# Supplementary material for: DAZL mediates a broad translational program regulating expansion and differentiation of spermatogonial progenitors
Source: eLife. 2020 Jul 20;9:e56523. doi: 10.7554/eLife.56523 (PMC7445011; doi:10.7554/eLife.56523)
Supplement: Figure 1—source data 1. [file elife-56523-fig1-data1.xlsx]

## Sheet: Description
Figure 1 - source data 1
Tab Name	Description
Sample metadata	Sample variables. "Dazl_status", "Cre_status", and "FACS_batch" were incorporated into the differential expression model in DESeq2. "Age" was confounded with "FACS_batch" and was therefore not included independently in the model. The complete genotype of each animal is listed under "Genotype"
Diff exp analysis	Deseq2 output, merged with sample TPMs. "log2FoldChange" represents enrichment in Ctrl/cKO samples.

## Sheet: Sample metadata
Sample_name	Dazl_status	Cre_status	FACS_batch	Age	Genotype
Ctrl1	Ctrl	Cre-positive	1	6months	Dazl2L/+; Ddx4Cre/+; Pou5f1:EGFP/+
Ctrl2	Ctrl	Cre-positive	2	8months	Dazl2L/+; Ddx4Cre/+; Pou5f1:EGFP/+
Ctrl3	Ctrl	Cre-negative	2	8months	Dazl2L/-; Ddx4+/+; Pou5f1:EGFP/+
cKO1	cKO	Cre-positive	1	6months	Dazl2L/-; Ddx4Cre/+; Pou5f1:EGFP/+
cKO2	cKO	Cre-positive	2	8months	Dazl2L/-; Ddx4Cre/+; Pou5f1:EGFP/+
cKO3	cKO	Cre-positive	3	8months	Dazl2L/-; Ddx4Cre/+; Pou5f1:EGFP/+

## Sheet: Diff exp analysis
Row.names	baseMean	log2FoldChange	lfcSE	stat	pvalue	padj	Ctrl1_TPM	Ctrl2_TPM	Ctrl3_TPM	cKO1_TPM	cKO2_TPM	cKO3_TPM
0610005C13Rik	2.73671	1.20752	3.6023	0.335207	0.737469	NA	0.98952	0	1.0367	0	0.22704	0.235713
0610009B22Rik	340.919	-0.128433	0.321119	-0.399953	0.689191	0.912434	64.1824	65.0526	61.6549	75.7466	81.4641	98.3604
0610009E02Rik	26.6853	0.147079	1.04465	0.140792	0.888034	0.972614	11.4533	5.7838	2.93003	8.01558	4.01594	5.85007
0610009L18Rik	24.0694	1.62263	1.14035	1.42292	0.15476	0.494271	13.927	8.44838	22.3699	6.40957	2.54366	3.50646
0610010B08Rik	154.292	-0.122185	0.57171	-0.213719	0.830766	0.955342	2.73219	3.55303	1.87849	6.83415	1.77319	1.64801
0610010F05Rik	1015.6	-0.12115	0.215393	-0.562457	0.573805	0.86315	27.1681	28.2152	28.3698	27.7964	34.0968	21.0506
0610010K14Rik	2475.74	-0.0577036	0.168495	-0.342464	0.732001	0.92612	464.425	465.255	402.249	546.262	494.533	589.38
0610012G03Rik	695.463	0.0580116	0.241364	0.240349	0.81006	0.948347	51.6458	55.9045	49.4949	54.4355	55.7029	73.8786
0610030E20Rik	390.619	0.260342	0.306524	0.849336	0.395694	0.754091	10.435	7.08794	6.35522	8.06214	6.97716	6.8059
0610031O16Rik	NA	NA	NA	NA	NA	NA	0	0	0	0	0	0
0610037L13Rik	851.229	0.0344916	0.222312	0.155149	0.876704	0.969592	67.9417	59.3677	62.3881	70.1639	61.7414	64.3427
0610038B21Rik	87.2421	0.431059	0.625933	0.688667	0.491033	0.817302	9.2498	9.86734	4.96876	10.8365	5.26388	4.88434
0610039H22Rik	NA	NA	NA	NA	NA	NA	0.515039	0	0	0	0	0.377819
0610039K10Rik	20.4173	0.0912853	1.19649	0.0762942	0.939185	0.986707	2.68108	3.83921	2.18535	3.90472	2.75455	2.97064
0610040B10Rik	6.47871	1.50483	2.12264	0.708944	0.478359	NA	8.67487	16.6996	22.0992	11.8881	2.8778	9.62313
0610040F04Rik	2.21154	1.24806	3.42918	0.363954	0.715893	NA	0.653447	0.162315	0	0.359359	0.222935	0.161189
0610040J01Rik	8.8295	-1.0191	1.75853	-0.579519	0.562239	NA	0.562859	0.221826	0.353711	0.861931	0.68428	0.356017
0610043K17Rik	3.85572	-0.392719	2.59055	-0.151597	0.879505	NA	2.33172	0.499163	0.832403	0.858547	3.41018	1.76191
1010001N08Rik	NA	NA	NA	NA	NA	NA	0.49675	0	0	0	0	0.338552
1110002J07Rik	3.6371	-1.0952	2.6232	-0.417507	0.676308	NA	0.159761	0.0542824	0.125296	0.180242	0.300111	0.112857
1110002L01Rik	191.99	0.0166506	0.41312	0.0403044	0.96785	0.991614	6.93607	4.91237	4.17727	6.80678	5.34214	4.6915
1110004F10Rik	2723.95	0.0170632	0.158748	0.107486	0.914404	0.980733	205.455	227.789	236.083	218.587	233.592	237.969
1110006O24Rik	53.2976	0.0514721	0.754564	0.0682144	0.945615	0.987985	12.2468	12.0011	13.6762	12.4372	13.5534	11.6276
1110008L16Rik	1683.98	0.160528	0.17818	0.900935	0.367623	0.733563	54.562	54.7237	59.2835	50.3521	52.0728	44.884
1110008P14Rik	778.224	0.0825375	0.23886	0.345548	0.729682	0.925705	220.247	229.222	232.998	249.089	233.397	317.28
1110012L19Rik	504.862	-0.199667	0.272281	-0.733311	0.463369	0.800484	59.6084	58.6595	53.6646	74.1729	71.7092	71.9016
1110015O18Rik	NA	NA	NA	NA	NA	NA	0	0	0	0	0	0
1110017D15Rik	218.94	3.26548	0.42025	7.77032	7.8288e-15	2.63617e-12	57.0751	39.5582	69.9066	9.83691	10.2029	2.90388
1110019D14Rik	91.4353	0.118585	0.587524	0.201839	0.840042	0.9589	9.72003	5.88733	5.22028	8.06899	6.76376	7.2311
1110020A21Rik	20.9962	-0.483144	1.18744	-0.406879	0.684097	0.909102	2.94749	3.87568	5.24386	6.5372	3.90699	3.45685
1110025L11Rik	NA	NA	NA	NA	NA	NA	0	0	0	0	0	0
1110028F11Rik	NA	NA	NA	NA	NA	NA	0	0	0	0	0	0.0494621
1110028F18Rik	2.13331	-4.5101	4.24845	-1.06159	0.288424	NA	0	0	0	0.97099	0.168229	0.0621244
1110032A03Rik	628.553	-0.19533	0.249309	-0.783483	0.433343	0.77965	17.0993	15.3772	16.1093	20.0031	18.6209	20.0799
1110032F04Rik	29.593	-2.06655	1.15088	-1.79562	0.0725546	0.336123	1.22756	0.0536911	1.23768	2.81214	0.72245	1.28426
1110036E04Rik	NA	NA	NA	NA	NA	NA	0.212276	0	0.476618	0	0.227513	0
1110038B12Rik	121.412	0.833866	0.516543	1.61432	0.106458	0.410097	90.1154	52.8284	53.6733	57.0321	34.213	47.8151
1110038F14Rik	889.295	0.419922	0.224354	1.8717	0.0612488	0.304284	84.1197	77.1562	59.5564	72.5439	57.1707	71.0422
1110046J04Rik	2.43987	0.263002	4.58035	0.0574196	0.954211	NA	0	0	2.52404	0	0	0.595584
1110051M20Rik	989.427	0.290237	0.213605	1.35875	0.174226	0.528527	59.7408	45.8086	48.6184	50.1478	38.0716	36.7442
1110058D11Rik	NA	NA	NA	NA	NA	NA	0	0	0	0	0	0
1110059E24Rik	1015.63	-0.261178	0.209961	-1.24393	0.213525	0.5786	73.9079	65.6307	78.1542	88.6694	88.4342	83.7734
1110059G10Rik	441.259	-0.186278	0.287287	-0.648403	0.516724	0.831698	11.6207	12.0421	11.0514	14.1334	13.9173	11.808
1110065P20Rik	561.174	0.210384	0.269563	0.780464	0.435118	0.781552	130.481	137.837	128.237	138.861	124.347	156.506
1190002N15Rik	1403.84	0.334672	0.190927	1.75288	0.0796226	0.355757	34.4673	43.9734	46.8377	30.3352	34.1838	19.6414
1190005I06Rik	5.22865	1.5829	2.30701	0.686127	0.492633	NA	1.02181	2.09597	2.11559	0.973553	0.274152	1.00136
1190007I07Rik	206.461	0.163589	0.411275	0.39776	0.690807	0.913004	56.601	47.7612	56.9438	62.2615	44.1749	57.4688
1190028D05Rik	27.7715	-0.193942	1.03996	-0.18649	0.852061	0.961506	9.36947	4.86516	5.2002	7.46249	9.96461	3.76076
1300002E11Rik	182.243	0.142604	0.42629	0.334524	0.737984	0.928332	70.2458	40.1982	46.4965	49.6337	51.3465	52.9165
1300017J02Rik	80.2471	-0.192047	0.62936	-0.305147	0.760255	0.935702	2.93738	3.67258	3.48961	4.29839	3.65688	3.66262
1500004A13Rik	103.942	-0.345353	0.568429	-0.607557	0.543481	0.845751	3.19866	2.08955	2.78934	3.058	3.89345	1.6094
1500009C09Rik	NA	NA	NA	NA	NA	NA	0.216751	0.0938509	0	0.158148	0	0
1500009L16Rik	199.828	-0.11562	0.409346	-0.282451	0.777597	0.937714	25.9586	15.4741	17.0873	32.1701	16.5665	17.8482
1500011B03Rik	792.077	0.516822	0.231006	2.23727	0.0252688	0.176545	196.438	182.308	161.791	147.125	132.895	165.373
1500011K16Rik	59.9068	0.164928	0.715816	0.230405	0.817777	0.950438	11.3582	12.3555	14.8114	10.4258	12.9991	13.3314
1500012K07Rik	3.45654	1.27001	2.99936	0.423426	0.671985	NA	0.169398	0.112437	0.132531	0.463954	0	0.029389
1500015A07Rik	489.517	0.299902	0.278866	1.07544	0.28218	0.653349	32.6245	28.0011	29.6126	25.0165	26.5994	26.9748
1500015L24Rik	NA	NA	NA	NA	NA	NA	0	0	0	0	0	0
1500015O10Rik	NA	NA	NA	NA	NA	NA	0	0	0.393332	0	0	0.266829
1500026H17Rik	27.398	0.0148187	1.03392	0.0143326	0.988565	0.996097	0.966137	0.788825	0.715952	0.885123	0.924139	0.841008
1600002D24Rik	NA	NA	NA	NA	NA	NA	0	0	0.0595309	0	0.0534895	0
1600002K03Rik	46.3892	0.563673	0.80596	0.699381	0.484314	0.814202	23.3172	15.6803	12.6129	15.2769	14.4338	15.6497
1600010M07Rik	3.58645	1.31658	2.81987	0.466894	0.640576	NA	3.52967	1.00724	0	0.433266	1.72403	2.07611
1600012H06Rik	893.256	-0.17008	0.218518	-0.778336	0.436371	0.782231	29.0603	30.9308	31.5488	33.3567	38.0692	31.2698
1600014C10Rik	124.848	0.398612	0.506153	0.787531	0.430971	0.777695	4.60492	3.96571	3.83486	3.27004	3.52197	3.27942
1600014C23Rik	NA	NA	NA	NA	NA	NA	0.712445	0	0.784448	2.38839	0	0
1600015I10Rik	NA	NA	NA	NA	NA	NA	0	0	0	0	0	0
1600019K03Rik	NA	NA	NA	NA	NA	NA	1.0769	0	0	0	0	0
1600020E01Rik	281.732	0.1946	0.353312	0.550788	0.581779	0.867755	166.443	102.281	114.344	173.204	105.567	98.0843
1600023N17Rik	76.5341	0.351603	0.64659	0.543781	0.586592	0.870234	11.4126	12.8632	8.18313	12.2478	8.5818	9.79695
1600025M17Rik	NA	NA	NA	NA	NA	NA	0	0.727811	0	0	0	0.452802
1600027J07Rik	NA	NA	NA	NA	NA	NA	0	0	1.05224	1.0565	0	0
1600029I14Rik	1.18898	0.262803	4.49081	0.0585203	0.953334	NA	0.362473	0.237333	0.19123	0.198846	0.362531	0
1600029O15Rik	24.3926	0.0736097	1.0943	0.0672667	0.946369	0.988119	1.7351	1.25839	1.1922	1.97618	1.12037	1.48258
1700001C02Rik	31.8354	3.00057	1.03376	2.90257	0.00370117	0.0495361	14.4309	11.9861	21.6574	1.49763	2.24874	0.801589
1700001C19Rik	255.855	1.26683	0.369008	3.43308	0.000596763	0.0129643	38.9786	23.6157	30.0753	19.2706	9.61979	8.07584
1700001D01Rik	NA	NA	NA	NA	NA	NA	0	0	0	0	0	0
1700001F09Rik	33.6632	1.30196	1.14238	1.1397	0.254413	0.625105	0.875187	17.297	12.9962	1.4923	2.36904	0
1700001G01Rik	9.19502	3.2399	1.97746	1.63841	0.101336	NA	0.495034	1.77564	1.40488	0.154344	0.0668817	0
1700001G11Rik	18.7521	0.757612	1.30155	0.582085	0.56051	0.855959	2.75056	8.3343	5.81317	4.27998	2.31587	2.50638
1700001G17Rik	9.91954	-0.267162	1.74105	-0.153449	0.878044	NA	0.589223	1.77608	1.65123	1.93519	0.854423	4.47206
1700001J03Rik	27.2783	3.56343	1.19797	2.97456	0.00293409	0.0418801	3.72977	13.52	14.0237	0.457751	1.02202	1.0203
1700001J11Rik	88.1919	2.90662	0.671693	4.3273	1.50946e-05	0.00069888	2.51445	7.72922	8.94664	0.569678	0.692174	0.498585
1700001K19Rik	38.2475	3.64642	0.963517	3.78449	0.000154026	0.00459165	14.0658	9.41335	11.7263	1.06382	0.949302	0.115632
1700001K23Rik	2.90477	1.59817	3.54102	0.451331	0.651751	NA	0	5.08094	6.32828	0.912909	0	2.04103
1700001L05Rik	1096.02	-0.0307424	0.205576	-0.149543	0.881125	0.970091	16.7423	15.5335	15.248	16.6694	17.7354	14.7616
1700001L19Rik	75.4996	0.53301	0.653219	0.815974	0.414515	0.76861	5.23882	5.06459	5.47756	4.95435	2.8212	2.91391
1700001O22Rik	195.98	3.5874	0.444321	8.07391	6.80833e-16	2.4603e-13	54.235	36.6049	47.9421	4.91349	2.87828	2.3738
1700001P01Rik	6.00364	0.423049	2.14618	0.197117	0.843736	NA	0.709514	3.19707	5.68275	1.17419	1.5287	0.797993
1700003C15Rik	NA	NA	NA	NA	NA	NA	0.342676	0	0.401241	0	0	0
1700003D09Rik	2.30649	-0.64404	3.79526	-0.169696	0.865249	NA	0.176479	0	0.385684	0.565638	0	0.129208
1700003E16Rik	331.14	2.50067	0.348173	7.18227	6.85658e-13	1.5873e-10	30.4219	26.7438	37.5266	6.74518	4.26178	3.05566
1700003E24Rik	26.996	0.267703	1.0372	0.258103	0.796327	0.943151	24.9526	21.5871	18.6974	22.0186	29.7461	19.1213
1700003F12Rik	51.8773	3.59086	0.888737	4.04041	5.3358e-05	0.0020375	15.2417	19.1624	35.5108	2.35497	0.966749	1.21766
1700003G13Rik	1.90707	1.5336	3.91156	0.392068	0.695008	NA	0.27849	0.360418	2.06852	0.306422	0	0.205251
1700003G18Rik	13.8785	0.296037	1.42545	0.20768	0.835479	NA	6.93215	4.45306	4.94796	7.23101	3.79475	5.81545
1700003H04Rik	6.20896	2.34755	2.17346	1.0801	0.280097	NA	1.19076	3.70885	2.77034	0.784992	0.241687	0.173952
1700003I22Rik	1.84348	4.49883	4.51866	0.995611	0.319439	NA	4.05921	3.75452	3.43316	0	0	0
1700003L19Rik	NA	NA	NA	NA	NA	NA	0	0	0	0	0.250263	0
1700003M07Rik	39.2672	-0.196123	0.875791	-0.223938	0.822806	0.951877	1.83732	2.29462	1.40751	2.81311	2.18127	1.17216
1700003P14Rik	19.8497	5.32981	1.64382	3.24234	0.00118553	0.021874	8.01291	2.74062	5.24706	0	0.269027	0.391667
1700006A11Rik	17.7265	-0.307323	1.28286	-0.239561	0.810671	0.948578	1.03085	0.68599	1.18646	0.764457	1.49748	0.0719205
1700006F04Rik	NA	NA	NA	NA	NA	NA	0	0	2.14174	0	0	0
1700006H21Rik	3.34969	-2.02724	3.25128	-0.623521	0.532942	NA	0	1.47145	0	1.26451	1.66842	3.45539
1700007F19Rik	NA	NA	NA	NA	NA	NA	0	0	0.137206	0	0	0
1700007J10Rik	482.846	0.583905	0.292083	1.99911	0.0455968	0.254229	59.5405	67.0199	63.9193	50.7557	40.9946	52.7721
1700007K13Rik	51.7358	-0.450956	0.771881	-0.584229	0.559066	0.85504	7.86175	7.34836	8.49226	10.7816	10.9435	16.7853
1700007L15Rik	82.8457	-0.0388328	0.612072	-0.0634448	0.949412	0.988736	21.5578	18.1133	17.3673	22.1371	23.1997	22.4009
1700007P06Rik	3.48241	1.05465	2.6678	0.395324	0.692604	NA	0.739997	0.725239	1.56326	0.407351	0.400939	0.131885
1700008C04Rik	1.99477	1.55504	3.40781	0.456316	0.648163	NA	0.613624	0.537915	0.433343	0.224076	0.213723	0.464628
1700008J07Rik	334.431	0.20448	0.329971	0.619692	0.53546	0.842371	15.9287	15.7868	14.7455	16.6432	12.6544	12.928
1700008K24Rik	91.0961	2.49244	0.605641	4.11537	3.86555e-05	0.00154372	26.1465	30.4252	33.7567	4.90246	5.58588	1.53786
1700008O03Rik	24.8172	0.534069	1.08334	0.492982	0.622025	0.885799	6.60051	4.62431	5.383	4.97156	3.01442	3.42988
1700008P02Rik	8.69091	3.22705	2.11794	1.52367	0.127591	NA	3.72677	1.42437	5.09222	1.20351	0	0.159455
1700009C05Rik	NA	NA	NA	NA	NA	NA	0.439571	0.285596	0.232071	0	0.44206	0
1700009J07Rik	75.2011	3.59659	0.762514	4.71676	2.39631e-06	0.000147318	28.5907	16.8108	26.872	4.67218	0.669981	0.122695
1700009N14Rik	65.0751	4.21791	0.795237	5.30397	1.13313e-07	9.32694e-06	15.4551	8.62693	12.8692	1.09127	0.363084	0.773284
1700010B08Rik	44.5149	1.35819	0.84321	1.61074	0.107236	0.411503	8.88557	9.53302	12.5655	4.88181	3.15727	3.80339
1700010D01Rik	22.8358	1.1	1.19123	0.923415	0.355791	0.725398	20.3653	17.9499	43.908	20.0098	7.21945	8.38706
1700010I02Rik	NA	NA	NA	NA	NA	NA	0	0	2.24752	0	0	1.79447
1700010I14Rik	132.299	1.13424	0.549625	2.06367	0.0390494	0.230317	4.52704	13.2757	18.5586	3.65626	4.03752	1.73816
1700010J16Rik	2.16235	2.54804	3.91883	0.650205	0.51556	NA	0.336782	0.44463	1.248	0.18541	0	0
1700010K23Rik	NA	NA	NA	NA	NA	NA	0	0	0	0	0	0
1700010N08Rik	339.985	0.496017	0.322859	1.53632	0.124459	0.443724	41.5825	31.3346	34.2701	33.3264	22.1548	18.1764
1700011B04Rik	2.50445	3.55647	3.63003	0.979734	0.327217	NA	1.02596	2.644	0	0	0.365951	1.02272
1700011C11Rik	NA	NA	NA	NA	NA	NA	0	0	0	0	0	0
1700011L22Rik	36.4944	1.7202	0.95149	1.8079	0.0706224	0.33018	6.40911	6.97852	14.1015	3.19541	1.49848	1.64609
1700011M02Rik	3.26232	2.16149	3.25709	0.663628	0.506929	NA	10.4096	10.8786	9.14944	19.782	0	0
1700012A03Rik	132.358	5.25317	0.697724	7.52901	5.11258e-14	1.45669e-11	52.3945	29.4752	49.1842	2.95336	0.168476	1.21131
1700012B07Rik	118.198	0.359384	0.536606	0.669737	0.503026	0.825495	13.7101	17.0129	25.5779	15.5503	10.157	9.16599
1700012B09Rik	29.0079	1.4204	1.05995	1.34007	0.180222	0.536592	6.59873	17.8122	15.8414	5.05233	4.17747	1.05924
1700012C14Rik	5.39975	-1.64223	2.23231	-0.735664	0.461935	NA	1.70909	2.128	2.85654	7.6773	8.55316	9.36975
1700012D01Rik	113.048	0.617339	0.530659	1.16334	0.24469	0.61514	61.0278	26.4341	32.0978	44.0414	19.7698	17.8591
1700012D14Rik	11.3259	0.56098	1.57226	0.356799	0.721242	NA	9.25286	2.37997	3.56187	5.71988	2.41187	2.78486
1700012D16Rik	2.15369	3.99794	4.25267	0.940103	0.347165	NA	1.34995	1.15113	3.39102	0	0	0
1700012H19Rik	NA	NA	NA	NA	NA	NA	0	0	0	0	0	0
1700012I11Rik	NA	NA	NA	NA	NA	NA	0.131938	0	0	0.144992	0	0
1700012P22Rik	6.50649	0.486513	2.16928	0.224274	0.822544	NA	0.283318	1.66614	2.37055	0.308622	0.957321	0
1700013D24Rik	2.01106	3.59922	4.07779	0.882639	0.377431	NA	0.62406	2.36666	4.09155	0	0	0.498446
1700013F07Rik	28.4315	1.76922	1.0841	1.63197	0.102685	0.403152	12.3397	21.434	26.5479	7.80334	3.97854	4.38141
1700013G24Rik	156.4	3.36713	0.517183	6.51051	7.48953e-11	1.23294e-08	40.4392	27.2483	51.1949	5.8336	1.98184	1.74528
1700013H16Rik	838.911	-1.51214	0.235422	-6.42309	1.33535e-10	2.06089e-08	32.7287	45.0466	44.2775	84.8177	162.375	155.651
1700015F17Rik	22.8513	1.77948	1.16101	1.53271	0.125348	0.445789	5.75457	9.93302	14.2423	1.80878	3.39774	2.82464
1700015G11Rik	NA	NA	NA	NA	NA	NA	0	4.93175	0	0	0	0
1700016A09Rik	14.4929	0.172218	1.40281	0.122767	0.902292	NA	1.95644	4.32908	3.29864	2.79028	2.9166	1.98197
1700016C15Rik	13.5439	1.64756	1.48899	1.10649	0.268513	NA	3.6537	4.73995	7.9889	2.14143	0.991458	0.534392
1700016D06Rik	122.333	0.326869	0.51169	0.638804	0.522951	0.83454	12.4266	12.8283	14.8248	11.5033	10.1656	8.38645
1700016G22Rik	1.65209	2.19808	4.3991	0.499667	0.61731	NA	0.438443	1.12249	2.35774	0.485168	0	0
1700016H13Rik	122.174	4.05615	0.610661	6.64222	3.08987e-11	5.66303e-09	49.4524	26.1502	53.2105	5.06787	1.10515	1.27908
1700016K05Rik	NA	NA	NA	NA	NA	NA	0	0	0	0	0	0
1700016K19Rik	358.128	0.301279	0.340973	0.883587	0.376919	0.740445	56.6996	70.9996	65.5077	63.6785	49.5578	60.8476
1700016L04Rik	14.1909	-0.851979	1.43314	-0.594486	0.552187	NA	1.27723	1.89213	2.51912	4.18133	2.20262	1.80656
1700016L21Rik	NA	NA	NA	NA	NA	NA	0	0	0	0	0	0
1700016P04Rik	11.5188	4.4222	1.97182	2.2427	0.0249163	NA	69.3614	31.1716	42.7625	9.91391	0	0
1700017B05Rik	582.175	-0.66272	0.261443	-2.53485	0.0112495	0.106093	7.91138	8.66495	9.92275	14.2842	13.2859	10.9077
1700017D01Rik	59.4018	2.4459	0.752164	3.25182	0.00114668	0.021424	7.89461	9.67714	14.3034	1.87878	1.54207	0.993233
1700017G19Rik	9.14241	2.55701	1.82782	1.39894	0.161831	NA	0.407413	0.864464	0.638488	0.0444793	0.227247	0.0567435
1700017J07Rik	NA	NA	NA	NA	NA	NA	1.09014	1.33901	1.23532	0	0	0
1700017L05Rik	9.82228	6.13512	2.38432	2.57311	0.010079	NA	9.78574	3.93526	17.2841	0	0	0
1700017N19Rik	45.1921	3.54193	0.899716	3.93672	8.26015e-05	0.00284509	4.97919	4.65385	7.48633	0.506071	0.371787	0.0926065
1700018A04Rik	3.111	1.41063	2.84959	0.495031	0.620578	NA	0.541117	1.75171	1.72138	0.595223	0.27907	0.199053
1700018B08Rik	126.404	0.366958	0.508604	0.7215	0.470602	0.80473	21.9735	14.2355	22.2045	20.8079	10.5158	6.5066
1700018B24Rik	837.033	-0.227278	0.226614	-1.00293	0.315894	0.686322	18.6158	21.1718	17.5389	24.2439	24.1149	29.8425
1700018F24Rik	26.7029	1.27992	1.25048	1.02354	0.306053	0.678205	0.696659	8.35217	7.27998	1.58046	0.820223	0.421552
1700018G05Rik	NA	NA	NA	NA	NA	NA	0	11.9861	3.81958	3.78357	0	0
1700018L02Rik	20.6239	2.77384	1.25204	2.21546	0.0267283	0.183252	2.16759	6.26415	3.27338	0.481451	0.730676	0.547793
1700019A02Rik	49.8819	0.685917	0.809908	0.846908	0.397047	0.755448	22.7742	22.5622	21.5637	23.9063	10.967	13.2129
1700019C18Rik	2.34764	3.38579	3.78128	0.895409	0.370569	NA	8.8055	21.1394	3.39034	6.70127	0	0
1700019D03Rik	107.471	2.19044	0.57728	3.79442	0.000147989	0.00443986	33.769	30.2943	42.7735	10.509	5.458	6.67978
1700019E08Rik	59.7611	-0.321162	0.733749	-0.437701	0.661603	0.900134	26.3344	12.9988	19.2719	24.6814	29.2393	23.2937
1700019G24Rik	5.19916	-1.12656	2.57462	-0.437563	0.661703	NA	0	6.41997	8.86387	4.90235	1.9544	1.79651
1700019M22Rik	53.4799	3.34351	0.895985	3.73166	0.000190221	0.00536822	29.7644	41.3639	52.2005	7.41512	1.86944	2.87021
1700019N19Rik	62.5223	3.71501	0.823925	4.50892	6.51595e-06	0.000339309	12.5044	18.8661	24.663	1.90896	0.783218	0.795664
1700019P21Rik	NA	NA	NA	NA	NA	NA	5.45553	4.37064	6.32302	0	0	0
1700020A23Rik	24.3091	4.38051	1.41395	3.09807	0.00194785	0.0312669	11.2771	10.9172	16.6742	2.45761	0	0.905605
1700020D05Rik	84.9627	1.11324	0.670555	1.66018	0.0968774	0.390929	5.66945	19.8074	26.4543	4.8799	5.88437	10.2394
1700020D14Rik	6.54051	2.72595	2.23008	1.22236	0.221573	NA	3.11274	3.99094	7.5732	1.1472	0.461795	0
1700020G17Rik	2.72793	5.1097	3.83168	1.33354	0.182354	NA	2.823	2.06992	1.72978	0	0	0
1700020I14Rik	2220.56	-0.379112	0.166372	-2.2787	0.0226848	0.166271	142.4	139.535	154.424	186.186	201.815	197.318
1700020L24Rik	10.7274	2.05154	1.70269	1.20488	0.228249	NA	2.31993	2.36722	4.06197	0.510332	0.748504	0
1700020M21Rik	NA	NA	NA	NA	NA	NA	0	0	0	1.15957	0	0
1700020N01Rik	268.645	-0.925121	0.360958	-2.56296	0.0103784	0.101037	22.1911	22.2624	20.2201	39.4572	52.2172	45.9394
1700020N15Rik	21.0952	0.776413	1.1694	0.663942	0.506728	0.827891	14.5488	16.1159	16.271	9.63645	12.673	8.351
1700020N18Rik	2.29591	3.90137	3.8103	1.0239	0.305882	NA	2.2952	4.36686	0	0.638029	0	0.452802
1700021F02Rik	NA	NA	NA	NA	NA	NA	0	0	0	0	0	0
1700021F05Rik	642.091	0.0781869	0.248225	0.314984	0.752774	0.933062	137.894	95.3478	91.1851	143.194	97.3553	109.019
1700021F07Rik	35.4205	0.152984	0.963935	0.158707	0.873899	0.968621	7.38859	18.5753	15.7769	13.5847	10.9749	10.5453
1700021N21Rik	2.07503	4.88299	3.97738	1.22769	0.219562	NA	0.672485	1.09441	0.17675	0	0	0.121217
1700022A21Rik	61.9379	5.5512	2.36897	2.34329	0.0191143	0.15028	7.00757	10.4307	11.6622	1.54486	0	0.175221
1700022A22Rik	2.72561	2.07388	3.31182	0.626205	0.53118	NA	0.939606	0.248182	1.39204	0.416268	0	0.135052
1700022E09Rik	NA	NA	NA	NA	NA	NA	0	0	0	0	0	0
1700022H01Rik	11.8006	2.95025	1.63998	1.79895	0.0720258	NA	4.48408	6.56775	6.9904	0.987481	0.625658	1.54934
1700022H16Rik	NA	NA	NA	NA	NA	NA	0	0	0	0	0	0
1700022I11Rik	10.1893	1.64392	1.94113	0.84689	0.397056	NA	0.0247189	0.978659	0.309884	0.0270029	0.160157	0
1700023C21Rik	NA	NA	NA	NA	NA	NA	0	0	0	0	0	0
1700023D09Rik	9.12957	1.28334	1.7231	0.744786	0.456401	NA	9.80001	5.32139	4.96466	4.41559	3.20575	3.06629
1700023F02Rik	NA	NA	NA	NA	NA	NA	0	0	0	0	0	0
1700023F06Rik	33.8137	2.63864	1.08111	2.44067	0.0146601	0.127393	2.65298	7.01696	10.5219	1.20819	0.419737	0.473505
1700024B18Rik	NA	NA	NA	NA	NA	NA	0	0	0	2.72934	0	0
1700024F13Rik	32.922	0.0358895	0.948853	0.0378241	0.969828	0.991614	13.5659	8.9597	8.05918	15.9888	9.32311	8.6749
1700024G13Rik	NA	NA	NA	NA	NA	NA	3.47261	4.1846	11.967	0	0	0
1700024I08Rik	NA	NA	NA	NA	NA	NA	0.236833	0	0	0	0.240191	0.345875
1700024N05Rik	NA	NA	NA	NA	NA	NA	0	0	0	0	0	0
1700024P04Rik	23.7165	3.79096	1.28757	2.94429	0.00323701	0.0447801	58.8672	25.4412	66.7073	7.39778	1.70315	0.961157
1700025B11Rik	3.07205	3.1165	3.46125	0.900396	0.367909	NA	0.55159	4.20413	4.79194	0.612845	0	0
1700025C18Rik	1.6815	4.29828	4.70195	0.914149	0.360638	NA	0.843715	1.09172	0.895465	0	0	0
1700025F22Rik	6.3009	2.96309	2.24951	1.31722	0.187766	NA	2.20163	3.30408	7.45295	0.40501	0.397854	0.275896
1700025F24Rik	12.5324	-0.332776	1.48883	-0.223515	0.823135	NA	2.36316	2.12431	1.73153	4.41981	2.03271	1.31609
1700025G04Rik	242.307	0.21376	0.37188	0.574809	0.56542	0.858595	2.6499	2.13502	2.02001	2.40739	1.90065	1.91489
1700025J12Rik	NA	NA	NA	NA	NA	NA	0	0	0	0	0	0.277185
1700025K24Rik	3.00789	2.52459	3.35824	0.751761	0.452195	NA	0.999958	1.29667	1.32315	0	1.02081	0
1700025M24Rik	6.17916	2.9762	2.519	1.1815	0.237403	NA	3.32671	1.58889	4.69328	1.83371	0	0
1700025N23Rik	9.23973	1.86557	1.75621	1.06227	0.288115	NA	1.89152	2.91644	1.29502	0.442512	1.3411	1.35521
1700026D11Rik	2.10673	-1.64907	4.00547	-0.411704	0.680556	NA	0	0.206799	1.32726	0.343803	0.154284	0
1700026F02Rik	1.37777	-0.611619	4.36461	-0.140131	0.888556	NA	0	2.50301	2.28878	1.14539	1.55006	1.76751
1700026J14Rik	6.27046	0.518649	2.03421	0.254964	0.798751	NA	1.64896	1.34705	2.27894	0.909351	1.51696	0.470774
1700027A15Rik	5.27228	6.37004	3.12829	2.03627	0.0417237	NA	24.0316	54.4164	0	0	0	0
1700027F06Rik	NA	NA	NA	NA	NA	NA	0	0	0	0	0	0
1700027F09Rik	NA	NA	NA	NA	NA	NA	0	0.603266	0.24557	0	0	0
1700027H10Rik	NA	NA	NA	NA	NA	NA	4.15929	0	0	0	0	0
1700027I24Rik	NA	NA	NA	NA	NA	NA	0.286901	0.371088	0	0	0	0.211848
1700027J07Rik	NA	NA	NA	NA	NA	NA	0	0	0.131349	0	0	0
1700028B04Rik	NA	NA	NA	NA	NA	NA	0	0.705067	0	0	0	0
1700028D13Rik	12.3077	2.57918	1.62879	1.58349	0.113309	NA	4.30171	10.0973	3.4765	1.77433	1.2718	0
1700028E10Rik	114.997	0.184965	0.52517	0.3522	0.724688	0.924466	14.9036	12.7235	12.4127	16.1788	13.5733	12.3361
1700028I16Rik	112.231	1.12095	0.533205	2.10228	0.0355285	0.216825	29.5462	17.0072	16.7279	12.8354	9.77096	8.09341
1700028J19Rik	117.078	1.25717	0.599925	2.09555	0.0361221	0.219263	9.47338	23.1791	26.6174	8.01373	5.56043	2.98329
1700028K03Rik	183.938	0.0718687	0.421345	0.17057	0.864562	0.966663	16.6902	8.03764	9.80526	15.0122	11.1376	11.9987
1700028M03Rik	NA	NA	NA	NA	NA	NA	1.20713	0	0	0	0	0
1700028P14Rik	18.6039	0.573191	1.32511	0.432562	0.665333	0.901882	0.886975	7.17571	7.67279	1.56203	2.4224	0.25263
1700028P15Rik	5.79358	-1.66612	2.21833	-0.75107	0.45261	NA	0.198102	0.77364	1.04432	1.74082	1.1083	1.88737
1700029B22Rik	25.305	5.64963	1.56715	3.60502	0.000312125	0.00777219	11.4377	11.0962	20.3411	0	0.594495	0.211094
1700029F12Rik	198.671	2.93629	0.458435	6.40504	1.50335e-10	2.29624e-08	30.2502	32.7884	52.506	5.83927	3.22497	1.4989
1700029H14Rik	304.554	3.70819	0.38561	9.61642	6.81609e-22	4.2078e-19	56.4246	28.7791	52.6095	5.76243	1.83552	2.13687
1700029I15Rik	NA	NA	NA	NA	NA	NA	0	6.00304	2.90342	2.86335	0	0
1700029J03Rik	1.53564	0.769417	4.03366	0.190749	0.848722	NA	0.874644	0.284158	0.230862	0.480166	0.219778	0
1700029J07Rik	310.912	0.203545	0.342375	0.594509	0.552172	0.851653	24.1191	18.0243	23.1996	22.1169	13.2127	13.3677
1700029M20Rik	133.826	0.674828	0.492332	1.37068	0.170476	0.521306	7.26371	4.73122	6.49231	4.13796	3.61265	1.71108
1700029N11Rik	NA	NA	NA	NA	NA	NA	0.511955	0.652085	1.10813	0	0	0
1700029P11Rik	186.615	-0.0685602	0.422565	-0.162248	0.871111	0.968313	22.0216	23.5153	21.8422	26.4342	25.3051	34.3592
1700030A11Rik	1.66777	2.16007	4.93565	0.437647	0.661642	NA	0	0.452688	1.27318	0	0	0
1700030C10Rik	370.463	-0.0693694	0.32654	-0.212438	0.831765	0.955824	18.7939	25.2195	28.1272	25.6038	22.7844	24.1805
1700030C14Rik	4.6485	3.60787	2.68688	1.34277	0.179346	NA	1.5642	1.90491	2.63915	0.0294353	0.507967	0.179732
1700030F04Rik	NA	NA	NA	NA	NA	NA	2.58644	0	17.9772	0	0	0
1700030F18Rik	2.72541	0.553349	3.88777	0.142331	0.886819	NA	0	2.95574	1.64169	1.69368	0	0
1700030J22Rik	301.37	0.716921	0.338519	2.11782	0.0341906	0.212308	12.817	11.1018	14.2976	7.92616	7.39891	5.33293
1700030K09Rik	408.285	0.0997437	0.314175	0.317479	0.75088	0.931899	16.0501	18.1257	18.6775	19.3522	14.5059	13.6585
1700030L20Rik	7.93732	2.0467	2.16541	0.945176	0.344569	NA	1.6357	0.774342	2.29364	1.7036	0	0.204398
1700030M09Rik	2.1583	-0.94901	3.88148	-0.244497	0.806846	NA	0	0.576118	0.779493	0.162199	0.429456	0
1700030N03Rik	NA	NA	NA	NA	NA	NA	0	0	0	0	0	0
1700030O20Rik	NA	NA	NA	NA	NA	NA	0	0.558469	0	0	0.982046	0.333245
1700031A10Rik	NA	NA	NA	NA	NA	NA	0	0	0	1.09591	0	0
1700031F05Rik	29.4878	1.1934	1.03903	1.14858	0.25073	0.620984	3.41233	3.74886	2.44507	2.82075	0.962057	1.4759
1700031L13Rik	5.6233	1.18437	2.70345	0.438094	0.661318	NA	0	3.16642	3.17966	0.221063	0.20968	0
1700031M16Rik	106.977	4.1616	0.700461	5.94123	2.82884e-09	3.35297e-07	47.3302	26.9874	48.1841	5.49953	0.559483	1.6326
1700031P21Rik	NA	NA	NA	NA	NA	NA	0	0	0	0	0	0
1700034E13Rik	12.6289	4.57707	1.9233	2.3798	0.017322	NA	19.7873	14.8423	23.6886	2.66079	0	0
1700034G24Rik	22.1528	4.4904	1.475	3.04434	0.00233194	0.035766	6.80679	2.78149	7.37216	0.73351	0	0.286583
1700034H15Rik	437.776	0.487364	0.294586	1.6544	0.0980458	0.393565	9.60589	11.0778	11.9119	8.05254	7.32779	8.03785
1700034I23Rik	58.0789	4.34483	0.883955	4.91522	8.86839e-07	6.08306e-05	5.27362	3.47327	5.66229	0.447631	0.0730011	0.108063
1700034J05Rik	76.362	3.45587	0.716624	4.82243	1.41823e-06	9.55114e-05	4.00493	7.84053	9.4952	0.273449	0.976185	0.279272
1700034K08Rik	NA	NA	NA	NA	NA	NA	0	0	0.83633	0	0	0
1700034P13Rik	97.3057	0.164685	0.570608	0.288613	0.772878	0.937431	6.97366	9.32159	10.2516	5.81113	10.2573	5.73157
1700036G14Rik	1.52204	-0.247137	4.55439	-0.0542636	0.956725	NA	0	0.76742	3.30786	0	1.50593	0.482245
1700037C18Rik	42.4373	0.0118929	0.847636	0.0140307	0.988805	0.996097	4.25666	5.59461	8.28551	5.46224	5.20145	3.98405
1700037H04Rik	2135.39	0.280787	0.179398	1.56516	0.117546	0.432352	212.305	202.895	211.279	208.318	160.437	170.562
1700039E22Rik	NA	NA	NA	NA	NA	NA	0	0	0	0	0	0
1700039M10Rik	1.36472	3.85149	4.74153	0.812288	0.416626	NA	0.638031	3.22316	0.69803	0	0	0.511326
1700040D17Rik	39.1725	1.19907	0.876186	1.36851	0.171151	0.522517	8.63897	6.50016	6.01829	3.47753	3.55687	2.06662
1700041A01Rik	NA	NA	NA	NA	NA	NA	0	0	0	0	0	0
1700041C23Rik	NA	NA	NA	NA	NA	NA	0	0	0	0	0	0
1700041M19Rik	4.52743	1.12883	2.91977	0.386617	0.699039	NA	0.327069	0.143303	2.06415	0.477298	0	0
1700042G07Rik	2.29224	4.88335	4.11845	1.18572	0.235731	NA	10.1818	15.2512	8.84856	0	0	0
1700042G15Rik	20.1569	1.53314	1.22318	1.25341	0.210057	0.574418	1.07458	2.29706	1.44519	0.289416	1.10388	0.111095
1700042O10Rik	3.52101	1.10238	2.87477	0.383467	0.701374	NA	1.48574	0.163065	0.389024	0.541552	0.119606	0
1700044C05Rik	NA	NA	NA	NA	NA	NA	0.177335	0	0	0	0	0
1700044K03Rik	NA	NA	NA	NA	NA	NA	0	0	0	0	0	0
1700045H11Rik	NA	NA	NA	NA	NA	NA	0	0.561247	1.41465	0	0	0.335127
1700046C09Rik	NA	NA	NA	NA	NA	NA	0.52132	0.663593	0.564656	0	0	0
1700047A11Rik	2.34806	1.91726	3.34448	0.573261	0.566468	NA	1.92559	1.97913	0.41233	0.425353	0.843279	0
1700047E10Rik	89.8531	0.836778	0.642731	1.30191	0.192947	0.553584	59.6357	66.5651	40.1256	62.2293	28.7991	23.7454
1700047G03Rik	1.91618	1.32411	4.46486	0.296563	0.7668	NA	0	0.993382	1.00521	0	0.192034	0
1700047I17Rik2	2385.09	0.347124	0.165752	2.09423	0.0362392	0.219478	54.6086	65.7359	65.0382	47.3921	51.0759	61.588
1700047L14Rik	NA	NA	NA	NA	NA	NA	0	0	1.61162	0.817059	0	1.79651
1700047M11Rik	1.8119	-2.40099	4.66733	-0.514424	0.606955	NA	0	0	1.26194	1.63425	0	0.439389
1700048M11Rik	NA	NA	NA	NA	NA	NA	1.00316	0	0	0	0	0
1700048O20Rik	392.527	-0.0539781	0.301381	-0.179103	0.857857	0.963829	24.7673	20.4939	17.3996	27.2899	22.3333	22.4775
1700049E15Rik	1.89796	0.553108	3.46846	0.159468	0.8733	NA	0.473733	0.207293	0.166174	0.34626	0.15273	0.447838
1700049E17Rik1	575.329	0.428046	0.269825	1.58638	0.112653	0.422227	44.0216	37.9305	41.6981	40.0832	25.2936	21.3993
1700049E17Rik2	575.329	0.428046	0.269825	1.58638	0.112653	0.422227	44.0216	37.9305	41.6981	40.0832	25.2936	21.3993
1700049E22Rik	NA	NA	NA	NA	NA	NA	2.35274	0	0	0	1.08107	0.650936
1700049L16Rik	20.7955	4.05552	1.50002	2.70364	0.00685843	0.0769807	1.76325	9.8956	11.8679	0.268192	0.37638	1.04345
1700051A21Rik	37.1778	1.12446	1.0723	1.04865	0.294341	0.66624	1.68603	6.37648	8.02221	3.30885	0.781716	0.200198
1700052I22Rik	NA	NA	NA	NA	NA	NA	0	0	0	0	0	0
1700052K11Rik	173.881	-0.462417	0.441987	-1.04622	0.295459	0.667609	5.18459	6.62866	7.58932	8.78751	8.30341	8.78044
1700054A03Rik	3.91325	2.94972	3.01727	0.977611	0.328267	NA	1.34288	0.290749	3.30963	0	0.225528	0.16296
1700054K19Rik	NA	NA	NA	NA	NA	NA	0	0	0	0	0	0
1700054M17Rik	NA	NA	NA	NA	NA	NA	0	0	0	0	0	0
1700055C04Rik	NA	NA	NA	NA	NA	NA	0	0	0	0	0	0
1700055D16Rik	27.1331	-0.0952403	1.04766	-0.0909079	0.927566	0.983775	1.44641	2.70631	1.26346	1.9002	2.29561	1.29105
1700056E22Rik	10.8858	0.348188	1.59148	0.218783	0.826819	NA	2.53315	1.84662	2.86353	2.79224	1.23615	0.790065
1700057G04Rik	50.4083	0.898058	0.81135	1.10687	0.268351	0.638901	7.78723	9.00497	9.51698	7.24382	3.20673	3.66307
1700057H15Rik	NA	NA	NA	NA	NA	NA	0	0	0	0	0.147211	0
1700057H21Rik	3.8936	-0.967484	2.56241	-0.377568	0.705751	NA	0.791491	3.95794	4.38677	3.54773	6.5723	1.97418
1700060C16Rik	NA	NA	NA	NA	NA	NA	0.34614	0.445892	0	0	1.11361	0
1700060C20Rik	0.586102	2.08192	4.92892	0.422388	0.672742	NA	0.876887	0	0	0	0	0.670255
1700061F12Rik	11.6482	3.47189	1.88086	1.8459	0.0649061	NA	2.52353	2.85261	6.05148	0.987073	0	0.255412
1700061G19Rik	32.4705	2.2492	1.01569	2.21445	0.0267977	0.183557	1.38312	2.7427	2.53404	0.183226	0.934784	0.350534
1700061I17Rik	NA	NA	NA	NA	NA	NA	0.160438	0.0709713	0	0.0583783	0	0
1700061J23Rik	4.0939	3.92928	3.00124	1.30922	0.19046	NA	9.22622	1.556	4.02957	0.684941	0	0
1700061N14Rik	7.01242	4.29785	2.48553	1.72915	0.0837819	NA	6.82866	16.5802	32.9299	1.55355	0	1.24199
1700063A18Rik	NA	NA	NA	NA	NA	NA	0	0	0	0	0	0
1700063D05Rik	22.1034	-0.109415	1.14869	-0.0952523	0.924114	0.982989	6.04798	4.98218	6.99876	8.16595	5.39945	5.87102
1700063H04Rik	2.91936	-1.61875	3.06827	-0.527579	0.597792	NA	0.20862	0.543897	0.645517	1.6022	0.814505	0
1700063O14Rik	NA	NA	NA	NA	NA	NA	0	0	0	0	0	0
1700064J06Rik	NA	NA	NA	NA	NA	NA	0	0	0	0	0	0
1700064M15Rik	31.8657	1.55272	0.988061	1.57148	0.11607	0.428751	14.1917	13.3767	19.5771	6.49012	4.45444	9.066
1700065D16Rik	7.73229	0.39623	1.83606	0.215805	0.82914	NA	7.77217	6.21783	4.66546	6.31512	7.45318	3.45422
1700065I16Rik	5.39404	2.59157	2.51178	1.03177	0.30218	NA	0.347567	1.80387	2.63008	0	0.49953	0.325013
1700065J11Rik	NA	NA	NA	NA	NA	NA	0	0	0	0	0	0
1700065J18Rik	NA	NA	NA	NA	NA	NA	0	0	3.70913	0	0	0
1700065L07Rik	2.88925	4.58924	3.75899	1.22087	0.222135	NA	0.721489	2.78545	2.69808	0	0	0
1700065O20Rik	NA	NA	NA	NA	NA	NA	0.281239	0.363906	0.298489	0	0	0
1700066B17Rik	2.44533	1.6987	3.30239	0.514386	0.606982	NA	1.92848	4.05793	1.40714	1.4331	0.815928	0
1700066B19Rik	15.4779	0.723669	1.36891	0.528645	0.597052	NA	0.843688	0.579557	0.544062	0.746573	0.26167	0.727305
1700066C05Rik	NA	NA	NA	NA	NA	NA	4.5271	11.4382	0	0	0	0
1700066J03Rik	9.19453	1.20513	1.75065	0.68839	0.491207	NA	8.48432	7.41091	9.29386	7.27745	2.49985	2.62442
1700066M21Rik	859.346	-0.23565	0.223937	-1.05231	0.292658	0.664423	19.2958	29.1868	32.7082	22.1271	38.3273	25.8972
1700066N21Rik	NA	NA	NA	NA	NA	NA	0	0	0	0	0	0
1700066O22Rik	NA	NA	NA	NA	NA	NA	0	0.194713	0.313265	0.323905	0	0
1700067G17Rik	5.5779	0.625884	2.20444	0.28392	0.776471	NA	1.66822	3.74254	4.02959	3.68921	0.929121	0.317206
1700067K01Rik	120.047	0.624114	0.525093	1.18858	0.234605	0.602684	13.5616	19.6909	21.8839	11.3716	11.8229	13.0904
1700067P10Rik	7.77711	3.5503	2.27929	1.55763	0.119321	NA	1.42644	3.47246	3.86994	0	0.866833	0
1700069L16Rik	4.42159	1.22874	2.45145	0.501232	0.616208	NA	2.79401	0.723145	1.18597	1.53716	0.289484	1.02982
1700069P05Rik	NA	NA	NA	NA	NA	NA	0	0	0	0	0	0
1700071K01Rik	2.24382	3.44501	4.83011	0.713236	0.4757	NA	0	1.7066	0	0	0	0
1700071M16Rik	8.52556	1.6448	1.8075	0.909985	0.36283	NA	0.338042	1.53115	0.865724	0.378664	0.336408	0.055335
1700072B07Rik	NA	NA	NA	NA	NA	NA	0	8.10188	0	0	0	0
1700072I22Rik	12.3075	0.00149209	1.52701	0.000977134	0.99922	NA	1.42595	3.0157	2.27932	2.95906	1.75523	1.94988
1700072O05Rik	NA	NA	NA	NA	NA	NA	0	1.2262	0	0	0	0.235387
1700073E17Rik	3.90751	-0.301793	2.90797	-0.103781	0.917343	NA	0	0.203459	0.134322	0.0215181	0.0797778	0.0151223
1700074H08Rik	NA	NA	NA	NA	NA	NA	0	2.18344	1.2486	0	0	0
1700074P13Rik	161.959	3.56214	0.503687	7.07213	1.52574e-12	3.37394e-10	13.4202	18.0917	28.9441	1.56603	1.34947	0.674136
1700080E11Rik	50.1627	4.45041	0.978199	4.5496	5.3748e-06	0.000294937	20.2468	12.4085	23.2909	1.9243	0.178349	0.83911
1700080N15Rik	NA	NA	NA	NA	NA	NA	0	0	0	0	0	0
1700080O16Rik	132.464	-0.22153	0.527369	-0.420066	0.674437	0.905771	12.1352	6.51633	9.00772	9.62665	12.5683	9.83644
1700081H04Rik	1.8914	1.48474	3.83292	0.387364	0.698487	NA	0.241624	0.158116	0.636715	0.264734	0	0.0852856
1700083H02Rik	NA	NA	NA	NA	NA	NA	0	0.920903	0	0.789427	0	0
1700084D21Rik	4.94175	0.992766	2.28355	0.434747	0.663746	NA	10.7453	7.41755	15.941	3.50016	12.7045	2.82054
1700084E18Rik	12.4305	2.09336	1.64371	1.27356	0.202819	NA	27.631	25.9614	23.0258	24.5012	2.54089	16.9232
1700084F23Rik	6.01618	0.97942	2.12465	0.460979	0.644814	NA	1.00043	0.494252	2.23392	0.410879	0.359832	0.0885959
1700084J12Rik	1.45494	-0.999187	4.9603	-0.201437	0.840357	NA	0	0.164192	1.75724	0	0.23311	0.374111
1700084M14Rik	24.6471	0.257163	1.0931	0.23526	0.814007	0.949931	13.3339	11.1399	15.5914	14.6269	9.96212	9.54261
1700085C21Rik	NA	NA	NA	NA	NA	NA	0	0	0	0	0	0
1700086L19Rik	60.3369	1.03389	0.729698	1.41688	0.156518	0.497698	12.2897	13.8461	22.8312	7.92879	5.23676	5.11737
1700086O06Rik	71.1933	0.118077	0.673588	0.175296	0.860847	0.964835	6.64721	6.81968	6.07672	8.1919	5.66417	6.55976
1700088E04Rik	51.9158	0.8577	0.802137	1.06927	0.284948	0.655456	6.03352	8.56127	6.92585	6.31437	3.13475	2.90114
1700091H14Rik	41.3055	0.297682	0.851903	0.349432	0.726765	0.92521	5.05549	2.80898	4.81397	4.28035	2.4624	1.19546
1700092C02Rik	NA	NA	NA	NA	NA	NA	0	0	0	0	0	0
1700092C10Rik	2.4916	1.56199	3.14862	0.496089	0.619832	NA	0.999958	1.91205	3.24333	0.554478	0.583318	0.387697
1700092E19Rik	NA	NA	NA	NA	NA	NA	0	0.70232	0.0700269	0	0	0
1700092K14Rik	NA	NA	NA	NA	NA	NA	0	0	0	0	0	0
1700092M07Rik	NA	NA	NA	NA	NA	NA	0	0	0	0	0	0
1700093K21Rik	28.9662	2.2523	1.09977	2.04798	0.040562	0.235489	2.91566	6.21816	10.9313	1.28118	0.620157	0.519207
1700094D03Rik	466.117	0.36237	0.282985	1.28053	0.200359	0.564572	16.1986	16.3025	15.8626	14.1052	12.3806	11.0677
1700094J05Rik	NA	NA	NA	NA	NA	NA	0.148894	0	0	0.164745	0.143881	0.10567
1700094M24Rik	NA	NA	NA	NA	NA	NA	0	0.414746	1.02685	0	0	0
1700095A21Rik	13.9727	0.872538	1.45313	0.600454	0.548204	NA	1.99356	1.51413	4.79375	1.63922	0.589652	0.0862281
1700095B10Rik	8.9221	3.44724	2.14671	1.60583	0.108312	NA	1.79667	1.79943	2.83204	0.805161	0	0
1700095J03Rik	37.6742	0.514196	0.890646	0.577329	0.563717	0.857675	2.75159	2.71314	2.92017	2.16733	1.86642	1.70719
1700095J12Rik	1.81258	4.29781	4.20696	1.02159	0.306973	NA	0.724546	0.940089	0.766435	0	0	0.17654
1700096J18Rik	1.65626	3.11524	4.90182	0.635526	0.525086	NA	10.2772	0	5.07345	0	0	0
1700096K18Rik	58.4493	-0.702604	0.731601	-0.960364	0.336872	0.707975	3.58421	4.02884	3.43705	7.42991	5.68037	5.66697
1700096P03Rik	NA	NA	NA	NA	NA	NA	0	0	0	0	0	0
1700097N02Rik	50.9917	-1.21541	0.780234	-1.55775	0.119292	0.435005	6.08843	5.03004	7.08537	14.3575	13.8471	14.2049
1700099I09Rik	NA	NA	NA	NA	NA	NA	0	0	0.325922	0	0	0
1700100I10Rik	15.4182	0.972358	1.38442	0.702357	0.482457	NA	1.41133	2.48642	4.51945	0.761226	1.78046	1.14482
1700100L14Rik	4.53894	5.29599	2.96756	1.78463	0.0743221	NA	1.80626	2.33402	3.84048	0	0	0.222998
1700101I11Rik	8.36008	1.65928	1.85225	0.89582	0.370349	NA	2.47795	1.62379	3.92598	1.13355	0.41936	0.912578
1700101O22Rik	NA	NA	NA	NA	NA	NA	0	0	0	0	0	0
1700102H20Rik	4.52644	1.12538	2.44544	0.460194	0.645377	NA	3.62712	1.31942	2.80541	0.575015	2.44348	4.0352
1700102P08Rik	46.475	0.987019	0.841145	1.17342	0.240626	0.609687	7.10305	6.44787	9.39704	2.28498	5.75632	3.46969
1700104L18Rik	NA	NA	NA	NA	NA	NA	0	0	0	0	0	0
1700105P06Rik	12.9	0.460016	1.48227	0.310346	0.756298	NA	8.54965	6.4097	4.89484	10.0404	4.11415	6.63419
1700108F19Rik	5.40182	-2.29173	2.51198	-0.912318	0.361601	NA	1.08472	0	1.71586	1.18941	1.42351	0.649111
1700108J01Rik	2.09106	-0.559685	3.61586	-0.154786	0.87699	NA	1.0148	1.25151	6.86633	3.43617	1.55006	0
1700109G14Rik	6.79963	1.94533	2.14953	0.905001	0.365465	NA	1.4495	2.15884	3.68986	0.22639	1.07156	0
1700109G15Rik	NA	NA	NA	NA	NA	NA	0	0	0	0	0	0
1700109H08Rik	28.4956	0.405632	1.05593	0.384146	0.70087	0.917595	5.66691	10.8656	6.77919	8.66534	5.02146	5.76948
1700109I08Rik	NA	NA	NA	NA	NA	NA	0	0	0	0	0	0
1700109K24Rik	3.08639	3.27096	3.23415	1.01138	0.311834	NA	0.118324	1.25359	0.498743	0.129872	0	0.166036
1700110C19Rik	NA	NA	NA	NA	NA	NA	0.527756	0.683702	0.559312	0	0	0
1700110I01Rik	51.8361	1.91634	0.782958	2.44756	0.0143826	0.125941	4.90688	6.08043	6.01443	1.68184	1.39858	0.103546
1700110I07Rik	20.8791	0.0992632	1.17445	0.084519	0.932644	0.984963	6.5165	5.06635	6.35194	7.45218	4.8154	3.44425
1700110K17Rik	3.35462	-0.695329	2.90252	-0.23956	0.810671	NA	0.302263	1.20705	2.33668	1.13048	0.934498	0
1700111N16Rik	NA	NA	NA	NA	NA	NA	0.230174	0.152358	0	0	0.444085	0.0808
1700112H15Rik	24.7936	0.283534	1.07965	0.262616	0.792847	0.942101	7.1997	7.3064	4.51573	7.65975	5.67117	2.13019
1700112J05Rik	6.39112	2.22381	2.22534	0.999314	0.317643	NA	1.56269	1.53345	3.72731	0.214429	0.639409	0
1700112J16Rik	36.1911	-0.140147	0.90748	-0.154435	0.877267	0.969669	1.55424	1.74677	1.68718	2.12017	1.72498	1.17629
1700113A16Rik	112.036	0.36006	0.536	0.671753	0.501741	0.824786	19.9563	16.2736	17.3516	18.8142	12.3635	15.0921
1700113B09Rik	NA	NA	NA	NA	NA	NA	3.41639	0	0	9.75212	0	0
1700113H08Rik	21.343	1.32738	1.19712	1.10882	0.26751	0.638028	1.50224	3.24715	4.07959	0.970364	0.925994	0.618873
1700116B05Rik	NA	NA	NA	NA	NA	NA	0	0	0	0	0	0
1700119H24Rik	NA	NA	NA	NA	NA	NA	0	1.16299	0	0	0	0
1700120C14Rik	NA	NA	NA	NA	NA	NA	0	0	0	0	0	0
1700120E14Rik	1.95116	2.34141	4.00511	0.584607	0.558812	NA	0.159012	0.210222	0.110748	0	0.1486	0
1700120G07Rik	2.0153	0.231554	4.04178	0.0572902	0.954314	NA	0.358376	0	1.34226	0.393273	0	0.128166
1700120K04Rik	10.0629	2.62536	1.71786	1.52828	0.126444	NA	21.8164	5.22964	4.49677	3.28001	1.44982	0.467061
1700121L16Rik	NA	NA	NA	NA	NA	NA	0.524518	0	0	1.74661	0	0
1700121N20Rik	NA	NA	NA	NA	NA	NA	0.275108	0	0.288479	0.45191	0	0
1700122C19Rik	5.839	3.61699	2.45897	1.47094	0.141307	NA	3.07526	1.32719	3.33867	0.4503	0	0.256786
1700122H20Rik	NA	NA	NA	NA	NA	NA	0	0	2.85792	0	0	0
1700122O11Rik	NA	NA	NA	NA	NA	NA	0.207129	0.270496	0	0	0.463174	0.167092
1700123J17Rik	2.29946	1.66799	4.18129	0.398919	0.689953	NA	0.376361	0	0	0	0.0517027	0.393485
1700123K08Rik	NA	NA	NA	NA	NA	NA	0	0.577635	0.432366	0.178375	0	0
1700123L14Rik	31.0969	3.95933	1.15157	3.4382	0.000585599	0.0127968	2.90756	3.57382	5.14452	0.353713	0.121221	0
1700123M08Rik	29.0268	0.203447	1.01768	0.199913	0.841549	0.959133	3.05716	4.34942	5.70404	3.63911	3.20911	3.28109
1700123O12Rik	1.51862	2.65057	4.91064	0.539761	0.589362	NA	1.8797	0	2.58847	0	0	0
1700123O20Rik	818.773	-0.118979	0.226045	-0.526351	0.598644	0.874705	46.2328	44.7918	45.9751	50.2021	55.0806	48.3925
1700123O21Rik	NA	NA	NA	NA	NA	NA	0	0	0.328337	0	0	0
1700124L16Rik	NA	NA	NA	NA	NA	NA	0	0	0	0	0	0
1700125G02Rik	NA	NA	NA	NA	NA	NA	0	0	0	0	0	0
1700125G22Rik	6.0385	-0.16945	2.07206	-0.0817783	0.934823	NA	0.874263	1.13931	1.10078	1.71694	0.860195	0.749124
1700125H03Rik	1.40688	3.5186	4.8508	0.725366	0.468228	NA	1.04264	0.447661	1.4837	0	0	0
1700125H20Rik	28.7269	0.370778	1.02032	0.363393	0.716312	0.921416	3.01112	7.1106	5.24068	3.1208	4.84664	2.89518
1700126H18Rik	NA	NA	NA	NA	NA	NA	0	0	0	0	0	0
1700128A07Rik	2.51155	1.55242	4.02273	0.385912	0.699562	NA	0	1.21216	1.36754	0.202937	0	0
1700128F08Rik	28.2377	0.123554	1.05156	0.117495	0.906468	0.978523	3.63888	3.46058	2.67808	6.3341	1.89322	1.21323
1700129C05Rik	59.1683	2.6234	0.790071	3.32046	0.000898698	0.0176461	8.90863	12.5384	21.9194	2.50634	1.30279	1.13755
1810006J02Rik	NA	NA	NA	NA	NA	NA	0	0	0	0	0	0
1810007C17Rik	NA	NA	NA	NA	NA	NA	0	0	0	0	0	0
1810007D17Rik	NA	NA	NA	NA	NA	NA	0	0	0.526118	0.546349	0	0.181955
1810008I18Rik	1.96128	3.07077	4.07319	0.753898	0.450911	NA	0.583593	1.88646	0.309969	0.64243	0	0
1810009A15Rik	577.963	0.123217	0.263696	0.467269	0.640307	0.893281	149.813	159.206	150.104	161.879	164.012	194.493
1810009J06Rik	NA	NA	NA	NA	NA	NA	0	0	0	0	0	0
1810010D01Rik	NA	NA	NA	NA	NA	NA	0	0	0	0	0.16143	0.119695
1810010H24Rik	48.6018	0.13348	0.79686	0.167507	0.866971	0.967528	5.89257	6.1276	4.78245	7.12123	4.89449	7.2039
1810012K16Rik	4.13231	-0.689373	2.43205	-0.283454	0.776829	NA	3.56235	1.50414	0.647085	5.94588	3.65865	0.941534
1810013A23Rik	NA	NA	NA	NA	NA	NA	0	0	0	0	0	0
1810013L24Rik	1294.33	-0.242428	0.202428	-1.1976	0.231071	0.598305	27.4287	26.7436	30.9832	29.5074	37.6438	26.809
1810014B01Rik	193.298	-0.322803	0.415392	-0.777104	0.437098	0.782792	12.8946	9.05698	12.2141	15.5422	13.1521	16.3945
1810018F18Rik	2.24752	1.33697	3.83353	0.348758	0.727271	NA	0.625828	0	0.16408	0.170672	0	0.109911
1810019D21Rik	53.1512	-1.67897	0.778386	-2.15699	0.0310068	0.20061	3.01747	1.45963	1.25524	7.55783	6.32358	5.66831
1810020O05Rik	29.9032	-0.963307	1.0003	-0.963017	0.335539	0.706458	3.74975	2.10931	2.90315	6.00503	5.8864	2.39379
1810021B22Rik	4.12879	-0.652728	2.43685	-0.267857	0.788809	NA	1.66985	0.861151	1.42411	2.20915	2.13528	0.498466
1810022K09Rik	645.185	0.388819	0.268702	1.44703	0.147889	0.485083	468.856	569.698	398.423	457.666	316.627	417.296
1810024B03Rik	17.6796	0.680922	1.29787	0.524646	0.599829	0.875142	2.15022	2.22269	1.17562	2.55894	0.794177	1.10496
1810026B05Rik	328.51	0.33282	0.345352	0.963711	0.335191	0.706127	5.79723	8.50698	7.39262	6.14098	5.48423	3.55707
1810030O07Rik	799.733	0.00711355	0.242124	0.0293798	0.976562	0.994132	34.4654	26.4287	22.5158	29.7793	33.3742	32.0534
1810032O08Rik	353.506	0.194482	0.320522	0.606765	0.544007	0.845751	63.2858	45.7891	38.7875	49.4046	39.1505	40.0032
1810034E14Rik	14.2874	-0.562012	1.41161	-0.398135	0.690531	NA	0.479287	0.944568	0.438247	1.04937	1.06437	1.13381
1810037I17Rik	1542.84	0.0590639	0.192216	0.307279	0.758631	0.935487	234.372	211.754	182.51	264.389	200.417	246.597
1810041H14Rik	1.98628	3.13136	4.31611	0.725506	0.468142	NA	16.021	9.60291	0	6.1017	0	0
1810043G02Rik	176.005	0.249367	0.429719	0.580303	0.561711	0.856468	13.2915	12.4414	10.3635	11.7069	11.3174	11.1218
1810044D09Rik	41.5984	0.906382	0.884091	1.02521	0.305263	0.67767	42.7319	41.7742	43.8202	40.4378	22.5749	32.3872
1810046K07Rik	4.03209	0.0793627	2.50864	0.0316358	0.974763	NA	0.356995	0.233735	0.749797	0.490183	0.169231	0.189353
1810053B23Rik	6.17407	0.230081	2.10071	0.109525	0.912786	NA	2.2977	0.247565	0.721805	1.37743	0.22028	0.272099
1810055G02Rik	1051.67	-0.0684286	0.206729	-0.331007	0.74064	0.929076	53.5183	49.9449	54.1764	56.2434	57.7811	51.8555
1810058I24Rik	917.02	0.303315	0.219847	1.37966	0.16769	0.516461	126.201	116.073	98.9159	113.454	96.9019	112.255
1810062G17Rik	2.2848	0.687046	3.78927	0.181313	0.856122	NA	0.175947	0.460148	0	0	1.02974	0.757477
1810062O18Rik	21.6627	-0.53464	1.204	-0.444053	0.657004	0.898412	1.61932	5.55995	6.60693	4.75068	5.37191	7.59421
1810063I02Rik	NA	NA	NA	NA	NA	NA	0	0	0	0	0	0
1810064F22Rik	27.9796	0.602966	1.03314	0.583623	0.559474	0.855083	1.3284	1.54689	1.44523	1.22464	0.780047	0.893604
1810065E05Rik	NA	NA	NA	NA	NA	NA	0	0.81568	0	0.684868	0	0
2010001A14Rik	8.18802	-1.05082	1.8678	-0.562599	0.573708	NA	0.835431	1.07679	1.7441	4.33649	1.18574	1.87498
2010003K11Rik	10.7675	0.020344	1.59383	0.0127642	0.989816	NA	1.63979	0.857482	1.02932	1.67319	0.949364	1.00725
2010005H15Rik	44.2874	0.277848	0.82688	0.33602	0.736856	0.92807	46.0362	23.2257	26.6667	33.7398	35.3737	24.8895
2010009K17Rik	NA	NA	NA	NA	NA	NA	0	0	1.07456	1.10239	0	0
2010010A06Rik	NA	NA	NA	NA	NA	NA	0	0	0	0	0	0
2010016I18Rik	22.9282	0.371664	1.14013	0.325984	0.744437	0.93053	3.05882	1.23565	1.9745	1.66101	1.53743	1.21118
2010106C02Rik	NA	NA	NA	NA	NA	NA	0	0	0	0	0	0
2010106E10Rik	NA	NA	NA	NA	NA	NA	0	0	0	0	0.0911006	0
2010109A12Rik	6.95507	1.59247	1.95772	0.81343	0.415972	NA	6.83972	5.78517	3.09969	3.16845	2.07786	3.59498
2010109I03Rik	9.27242	-0.133591	1.72335	-0.077518	0.938211	NA	0.378133	0.516284	1.02632	0.720948	0.394094	0.153388
2010111I01Rik	664.517	-0.0320104	0.248109	-0.129017	0.897344	0.975979	39.4512	18.1521	17.3553	31.8122	18.0809	18.0761
2010204K13Rik	58.0819	-0.0364894	0.725581	-0.0502899	0.959891	0.990664	18.865	14.3461	12.3814	18.3386	18.4534	21.7043
2010300C02Rik	919.218	0.450399	0.216327	2.08203	0.0373397	0.223977	32.064	17.0686	22.6149	24.0993	13.4915	10.3396
2010308F09Rik	NA	NA	NA	NA	NA	NA	0	0	0	0	0	0
2010310C07Rik	NA	NA	NA	NA	NA	NA	0.330107	0	0	0	0	0.354271
2010315B03Rik	96.6746	-0.400281	0.572671	-0.698973	0.484569	0.814202	2.84703	3.39264	2.50014	4.40219	4.07159	3.39821
2010320M18Rik	223.199	0.496509	0.430178	1.15419	0.24842	0.618588	53.9588	65.1938	46.1506	60.3866	36.1546	71.2171
2200002D01Rik	NA	NA	NA	NA	NA	NA	0	1.73553	1.51531	1.53966	0.89995	0.559469
2200002J24Rik	3.26202	1.21801	3.38409	0.359922	0.718906	NA	0	3.62236	3.02711	0.89141	0	0.30576
2210010C04Rik	86.7314	-1.16417	0.652586	-1.78393	0.074435	0.340379	5.04473	1.37452	2.45745	6.8277	5.84606	3.30032
2210011C24Rik	21.0579	1.00254	1.21154	0.827494	0.407957	0.764423	3.60203	6.4517	7.37257	3.50719	1.64717	2.05376
2210016F16Rik	1404.85	0.298325	0.191199	1.56029	0.118692	0.433835	43.8729	54.0398	55.4169	39.6236	43.6461	52.5041
2210016L21Rik	625.998	0.181847	0.258344	0.703896	0.481498	0.811872	78.7524	52.3127	48.653	62.523	59.8011	58.7261
2210039B01Rik	54.2198	0.426261	0.751498	0.567216	0.570568	0.861786	10.2619	7.16549	7.81037	9.07707	5.17544	5.38086
2210404E10Rik	NA	NA	NA	NA	NA	NA	0	0	0.459332	0	0	0.325921
2210406O10Rik	44.7867	0.0252076	0.831172	0.0303277	0.975806	0.993987	7.11592	6.09788	3.10496	5.28472	7.90546	7.37763
2210407C18Rik	NA	NA	NA	NA	NA	NA	0.505486	0	0	0	0	0
2210408F21Rik	37.766	0.364698	0.912677	0.399592	0.689457	0.912683	18.058	6.24788	7.63825	10.792	9.06758	6.89871
2210408I21Rik	208.596	-0.0456304	0.397972	-0.114657	0.908717	0.97881	10.5189	9.98901	11.8985	10.5793	11.7076	7.53678
2210409D07Rik	NA	NA	NA	NA	NA	NA	0	0	0	0	0	0
2210409E12Rik	NA	NA	NA	NA	NA	NA	0	0	0	0	0	0
2210414B05Rik	NA	NA	NA	NA	NA	NA	0	0	0	0	0	0
2210416O15Rik	2.86949	-0.889501	2.92502	-0.304101	0.761051	NA	0.0940381	0.260885	0.294153	0.20523	0.446623	0.336688
2210417A02Rik	5.27086	0.000176425	2.17896	8.09677e-05	0.999935	NA	3.93734	2.85596	1.22277	5.00147	3.40243	2.656
2210418O10Rik	123.392	0.413262	0.511315	0.808234	0.418956	0.771855	3.97185	2.58841	2.36026	2.627	2.35909	2.62554
2210420H20Rik	NA	NA	NA	NA	NA	NA	0.746694	0.960091	0	0.824357	0	0
2300002M23Rik	NA	NA	NA	NA	NA	NA	0	0	0	0	0.285049	0.0706352
2300003K06Rik	NA	NA	NA	NA	NA	NA	0	0	0	0	0	0
2300009A05Rik	95.0485	0.259892	0.584076	0.444962	0.656347	0.898412	39.9517	39.4837	29.5503	44.1481	33.942	48.7252
2310001H17Rik	NA	NA	NA	NA	NA	NA	0	0	0	0.277239	0	0.36958
2310001K24Rik	NA	NA	NA	NA	NA	NA	0	1.65802	0	3.10711	0	0
2310002D06Rik	NA	NA	NA	NA	NA	NA	0.777133	0	0	0	0	0
2310002F09Rik	NA	NA	NA	NA	NA	NA	0.0384402	0	0	0.0419684	0.107441	0.0533927
2310002L09Rik	NA	NA	NA	NA	NA	NA	0	0	0	0	0	0
2310003N18Rik	NA	NA	NA	NA	NA	NA	0	0	0	0	0	0
2310005A03Rik	8.59478	-0.55431	1.81327	-0.305696	0.759836	NA	1.04569	0.221439	1.17463	0.933053	0.62297	0.47646
2310005E17Rik	NA	NA	NA	NA	NA	NA	0	0	0	0	0	0
2310007B03Rik	NA	NA	NA	NA	NA	NA	0	0	0	0	0	0
2310008N11Rik	NA	NA	NA	NA	NA	NA	0.508907	0	1.10126	0.56456	0	0.39545
2310009A05Rik	29.3301	0.0975935	1.01274	0.0963654	0.92323	0.982786	20.3072	26.3522	23.554	27.5484	31.3256	36.3284
2310009B15Rik	79.2353	0.579765	0.624388	0.928533	0.353131	0.72315	49.9142	45.3764	31.5084	36.165	40.802	42.8617
2310010J17Rik	25.9037	1.05578	1.20058	0.879391	0.379189	0.74173	29.4224	37.4519	20.5676	52.5307	8.93214	39.1477
2310011J03Rik	500.244	-0.00920503	0.279552	-0.0329278	0.973732	0.993309	29.3848	32.6299	36.7733	34.7621	31.7134	37.3736
2310015A10Rik	99.216	0.0842051	0.565625	0.148871	0.881655	0.970091	2.28724	1.488	1.17315	1.98416	1.67344	2.44842
2310015D24Rik	NA	NA	NA	NA	NA	NA	0.098189	0	0.0341819	0.0715309	0.030199	0.0226855
2310016D03Rik	NA	NA	NA	NA	NA	NA	0.0681833	0	0	0	0	0
2310016G11Rik	2.58675	-2.96627	3.62137	-0.819101	0.412729	NA	0	0.334175	0.4033	0.844337	0.501841	0
2310020H05Rik	NA	NA	NA	NA	NA	NA	0	0	0	0	0	0
2310022A10Rik	480.258	0.182875	0.281444	0.649775	0.515837	0.831401	20.7438	20.6581	17.9468	16.2599	21.8598	18.7876
2310022B05Rik	221.084	-0.180306	0.38779	-0.464958	0.641962	0.893281	7.78346	5.13249	4.96764	8.82363	6.45282	5.7983
2310030A07Rik	8.87454	0.357737	1.73127	0.206633	0.836296	NA	5.24271	3.62236	3.892	3.56564	4.45871	1.83456
2310030G06Rik	113.628	-0.527881	0.529246	-0.997421	0.31856	0.688417	9.63793	9.39356	8.11226	15.6942	13.6884	13.48
2310033P09Rik	440.37	0.431634	0.297918	1.44883	0.147384	0.48493	51.9766	49.2782	45.788	47.4366	34.1628	38.6411
2310034C09Rik	NA	NA	NA	NA	NA	NA	0	0	0	0	0	0
2310034G01Rik	45.9566	0.0562811	0.815372	0.069025	0.94497	0.987632	11.1803	7.97652	6.94394	12.998	7.71408	14.351
2310034O05Rik	NA	NA	NA	NA	NA	NA	0.365939	0	0	0	0	0
2310039H08Rik	372.656	0.401551	0.31729	1.26557	0.205668	0.570241	74.6768	90.1934	85.0691	68.6998	68.4418	91.8266
2310039L15Rik	78.9158	0.16925	0.630543	0.26842	0.788376	0.940844	37.744	26.0603	21.8371	41.9414	24.603	20.2222
2310040G24Rik	14.7967	-0.675894	1.42701	-0.473644	0.635754	NA	3.45441	1.42798	7.33663	3.75111	4.11746	7.08266
2310043L19Rik	NA	NA	NA	NA	NA	NA	0	0	0	0	0	0
2310043M15Rik	7.90558	-0.43983	1.97543	-0.22265	0.823808	NA	0.383692	0.507562	0.797313	1.43815	0.289432	0
2310043O21Rik	NA	NA	NA	NA	NA	NA	0	0	0	0	0	0
2310050C09Rik	NA	NA	NA	NA	NA	NA	0	0	0	0	0	0
2310057J18Rik	NA	NA	NA	NA	NA	NA	0	0	0	0	0	0
2310057M21Rik	1291.4	0.0653359	0.193035	0.338467	0.735011	0.927508	33.2708	34.2698	32.7	32.149	33.9108	29.424
2310057N15Rik	NA	NA	NA	NA	NA	NA	0	0	0	0	0	0.0851295
2310061I04Rik	1590.89	0.18339	0.182842	1.003	0.315863	0.686322	181.598	170.069	163.125	175.541	157.116	145.098
2310061N02Rik	NA	NA	NA	NA	NA	NA	0	0	0	0	0	0
2310065F04Rik	NA	NA	NA	NA	NA	NA	0	0	0	0	0	0
2310068J16Rik	45.4419	0.912865	0.818468	1.11533	0.264708	0.634613	9.76991	6.84471	5.95636	6.11542	3.58012	4.83558
2310069B03Rik	1.92237	1.09083	4.13745	0.263648	0.792051	NA	0.163256	0	0.113618	0.0593085	0	0.265161
2310069G16Rik	NA	NA	NA	NA	NA	NA	0.553235	0	0.194164	0	0.350256	0
2310075C17Rik	NA	NA	NA	NA	NA	NA	0	0	0	0	0	0
2310079G19Rik	NA	NA	NA	NA	NA	NA	0	0	0	0	0	0.126248
2310081J21Rik	38.6327	-0.243809	0.880436	-0.276918	0.781843	0.939282	29.8938	15.8995	11.7332	41.2531	25.1151	25.6247
2400006E01Rik	158.68	-0.448019	0.465095	-0.963285	0.335405	0.706453	15.7782	15.6808	13.9059	28.3243	19.0888	22.6599
2410002F23Rik	3449.24	0.184262	0.15173	1.21441	0.224593	0.591928	191.065	192.998	194.085	166.175	192.709	194.011
2410003L11Rik	25.1931	-0.0925765	1.08172	-0.0855829	0.931798	0.984843	11.1864	6.66609	11.135	11.4785	10.1385	12.4082
2410004B18Rik	1037.38	0.0896191	0.208903	0.428999	0.667924	0.903246	80.2988	66.9153	63.3021	75.4545	70.8043	75.1015
2410004I01Rik	9.75826	-0.454812	1.69053	-0.269035	0.787903	NA	0.921219	1.01032	2.26069	1.51557	1.34643	1.97069
2410004P03Rik	34.8106	-0.0404044	0.922631	-0.0437926	0.96507	0.991521	2.44554	1.77787	1.72502	2.65396	1.93225	2.00948
2410006H16Rik	102.302	0.91405	0.633879	1.44199	0.149304	0.487458	196.507	143.651	105.041	220.373	75.8193	149.262
2410012E07Rik	17.8687	-2.47383	1.328	-1.86282	0.0624877	0.307071	0.599704	0.337528	0.0893111	3.38102	2.09547	2.68828
2410015M20Rik	1326.97	0.266604	0.210708	1.26527	0.205773	0.570284	318.756	326.312	302.173	333.664	266.307	386.701
2410017I17Rik	NA	NA	NA	NA	NA	NA	0.24312	0.105204	0	0.0884607	0	0
2410018L13Rik	95.6872	-1.0359	0.575947	-1.79861	0.0720809	0.334676	5.52106	4.9742	7.11027	11.387	11.4389	8.8892
2410021H03Rik	7.14853	-0.663348	1.94714	-0.340678	0.733346	NA	1.1744	1.21957	1.31723	3.71984	1.1899	1.86481
2410022M11Rik	88.3347	0.314351	0.627579	0.500895	0.616445	0.883512	3.77824	7.77195	5.31849	4.9055	4.3746	5.39187
2410124H12Rik	2.64244	2.04744	3.33538	0.613854	0.539312	NA	0.83547	0.720835	1.47751	0	0.865222	0.615753
2410131K14Rik	885.448	0.172601	0.23069	0.748193	0.454343	0.793832	38.0367	29.0495	35.8721	30.0771	32.2102	30.5063
2410137M14Rik	NA	NA	NA	NA	NA	NA	0.34255	0	0	0	0	0
2410141K09Rik	469.179	-0.0048771	0.282215	-0.0172815	0.986212	0.995761	48.1311	32.0869	34.6887	46.7319	40.6862	21.2216
2500002B13Rik	15.1164	0.183887	1.37799	0.133446	0.89384	NA	4.1331	2.90794	1.75982	5.78586	1.87697	3.62425
2500004C02Rik	3613.94	0.511201	0.185495	2.75588	0.00585344	0.0691583	212.233	258.533	233.995	198.014	151.508	184.148
2510002D24Rik	42.7332	-0.873997	0.848732	-1.02977	0.303119	0.676052	3.30137	2.51347	3.97516	7.01133	4.46916	5.90381
2510003B16Rik	7.64397	2.46543	1.99533	1.2356	0.216606	NA	5.69977	5.06202	7.28521	1.90107	0.692619	5.84184
2510009E07Rik	79.8816	0.729263	0.619992	1.17625	0.239496	0.608433	1.71982	2.30163	1.26694	1.07999	1.45067	0.552714
2510039O18Rik	1951.39	0.0189031	0.176359	0.107186	0.914642	0.980733	58.9158	89.1024	100.686	65.8607	87.3842	49.8288
2610001J05Rik	202.546	-0.0718469	0.407794	-0.176184	0.860149	0.96457	6.21567	5.42159	4.53998	7.5961	5.32355	7.36768
2610002M06Rik	363.539	-0.386097	0.319551	-1.20825	0.226952	0.593241	4.95561	4.42828	4.324	5.77936	6.96636	5.91392
2610005L07Rik	2073.48	-0.652884	0.178877	-3.64992	0.000262326	0.00684265	41.5001	30.7464	41.8457	59.7272	58.0546	47.9228
2610008E11Rik	93.9679	0.308629	0.616968	0.500234	0.61691	0.883512	2.97783	1.69076	2.02859	1.52712	2.34389	1.59655
2610016A17Rik	4.60128	-0.640842	2.31952	-0.276282	0.782331	NA	3.96706	3.67404	4.4665	6.71179	10.5201	3.4405
2610020C07Rik	196.574	0.234298	0.418099	0.560389	0.575214	0.863667	8.73234	11.7974	10.9425	9.25182	8.89568	7.67681
2610024D14Rik	72.0958	0.72462	0.656473	1.10381	0.269676	0.640514	4.66611	5.45423	5.75058	2.83332	3.69388	3.63981
2610027K06Rik	4.03662	0.175625	2.45683	0.0714845	0.943012	NA	0.180847	0.238805	0.0474199	0.149409	0.253964	0.222447
2610028E06Rik	11.8793	-0.102064	1.54805	-0.0659311	0.947433	NA	0.160042	0.494555	0.444309	0.320855	0.321754	0.167145
2610028H24Rik	26.7759	1.66505	1.04847	1.58808	0.112269	0.421535	3.26908	2.7899	0.802258	1.20911	0.887441	0.877772
2610035D17Rik	251.879	-0.23345	0.365963	-0.637907	0.523534	0.834748	14.7496	11.7912	13.027	17.5722	15.3159	13.6083
2610035F20Rik	3.07725	0.919157	2.94462	0.312148	0.754928	NA	0.618708	0.486957	0	0.40759	0.240208	0.533194
2610037D02Rik	77.3842	0.647257	0.641716	1.00863	0.31315	0.683422	3.38416	1.98112	2.28206	1.73445	1.72484	0.780313
2610042L04Rik	91.063	0.0264757	0.624447	0.0423986	0.966181	0.991614	1.72007	6.37543	9.25746	2.64669	4.54435	5.26368
2610044O15Rik8	178.874	-0.0276589	0.446256	-0.06198	0.950579	0.988736	15.3233	7.87984	8.17731	12.1525	11.4752	7.42604
2610203C22Rik	NA	NA	NA	NA	NA	NA	0.192203	0	0	0.3156	0.310237	0
2610206C17Rik	5.70762	0.182931	2.13362	0.0857376	0.931675	NA	0.440493	0.332988	0.330389	0.689019	0.17877	0.221281
2610301B20Rik	779.038	0.0191392	0.229631	0.0833474	0.933575	0.985526	37.29	38.6409	38.2725	39.0891	39.2869	30.8544
2610306M01Rik	65.4146	-1.46951	0.703089	-2.09008	0.0366105	0.220945	4.07533	3.73436	7.15012	13.7765	9.82498	13.1309
2610307P16Rik	301.174	0.181042	0.34952	0.517972	0.604478	0.87738	17.7871	10.7935	9.27004	19.6134	8.38005	6.90323
2610316D01Rik	1.8223	1.81675	4.50746	0.403055	0.686908	NA	0.461584	0.402339	0	0	0.913586	0
2610318M16Rik	10.5477	2.12414	1.64906	1.28809	0.197714	NA	4.64715	3.0238	3.71312	1.44797	0.663091	0.319771
2610318N02Rik	585.603	0.7692	0.257521	2.98694	0.00281784	0.0407308	67.1981	58.3088	103.449	41.2462	37.6455	37.0375
2610507B11Rik	17471	-0.153395	0.136106	-1.12702	0.259732	0.630542	224.687	184.837	235.478	231.132	243.174	127.369
2610507I01Rik	219.642	-0.000264162	0.394063	-0.000670355	0.999465	0.999735	6.938	7.04257	8.14842	8.13003	6.59491	7.82436
2610524H06Rik	1505.39	0.70235	0.185042	3.79563	0.00014727	0.00443486	318.058	246.769	239.901	210.469	164.615	223.842
2610528A11Rik	5.57469	3.06345	2.25432	1.35893	0.17417	NA	2.62699	2.78927	1.5154	0.262401	0.484885	0.348927
2610528J11Rik	4.88968	-5.50739	3.03406	-1.81519	0.0694955	NA	0	0	0	1.77174	1.5826	1.50519
2700012I20Rik	7.49598	-0.809597	1.90242	-0.425561	0.670428	NA	1.46986	0.95333	3.11056	3.49994	1.49675	0.896035
2700038G22Rik	557.423	0.646648	0.264408	2.44564	0.0144595	0.126242	76.8111	50.8595	48.8686	55.5314	32.7901	37.9564
2700046A07Rik	7.881	0.944315	1.88413	0.501193	0.616235	NA	0.734904	0.193898	0.821193	0.321764	0.136953	0.13702
2700046G09Rik	33.1044	-0.631993	0.95942	-0.658724	0.510073	0.829235	1.58766	1.27089	2.22931	2.33899	2.34561	3.78369
2700049A03Rik	1425.78	-0.0235393	0.199322	-0.118096	0.905991	0.978455	31.1998	19.6389	24.1251	28.3829	24.344	13.5015
2700054A10Rik	100.841	0.756747	0.55924	1.35317	0.176002	0.531196	2.72639	2.50116	3.04069	1.7451	1.49121	1.28889
2700062C07Rik	381.455	0.216551	0.306082	0.707496	0.479258	0.810666	46.4735	59.8257	51.6503	43.1721	54.9878	55.5207
2700069I18Rik	3.50618	0.953302	2.70786	0.35205	0.724801	NA	0.529429	1.8951	0.473963	1.33654	0.226256	0.342652
2700070H01Rik	42.0647	-0.197942	0.84429	-0.234447	0.814638	0.949939	2.75011	2.51436	2.1146	3.64492	2.75047	2.36407
2700081O15Rik	198.145	-0.266888	0.457841	-0.582927	0.559943	0.855534	2.74566	4.02114	3.79994	5.42857	3.25309	4.09948
2700089I24Rik	6.22576	-1.25994	2.13354	-0.590539	0.554829	NA	0.336782	0.234055	0	0.589703	0.781429	0.208645
2700097O09Rik	537.546	-0.0114879	0.267132	-0.0430046	0.965698	0.991588	57.2424	57.849	58.4531	55.8313	67.9848	50.6867
2700099C18Rik	1172.98	0.544694	0.204332	2.66573	0.00768221	0.0831407	174.702	120.532	124.491	113.3	100.147	86.3963
2810001G20Rik	351.565	0.201387	0.331632	0.607259	0.543679	0.845751	64.5405	60.8403	72.3868	71.9222	43.8715	69.4489
2810002D19Rik	199.001	0.553388	0.413582	1.33804	0.180885	0.537071	17.7879	15.4776	17.5639	10.8622	13.1187	13.858
2810004N23Rik	2135.28	0.115109	0.170174	0.67642	0.498774	0.822261	185.094	186.676	183.327	189.994	178.156	197.242
2810006K23Rik	397.338	0.202487	0.315137	0.642537	0.520525	0.83383	33.8517	20.6266	27.682	25.089	23.6921	24.6263
2810013P06Rik	598.99	-0.154785	0.254453	-0.608305	0.542985	0.845738	25.7764	29.9835	32.5633	30.3637	34.9465	36.9487
2810021J22Rik	505.72	-0.330221	0.275558	-1.19837	0.230771	0.597851	7.05726	8.25736	10.2038	8.40892	11.8765	9.85855
2810025M15Rik	544.262	0.134263	0.282055	0.476017	0.634062	0.891463	59.9994	67.7191	63.9332	70.347	56.2399	68.2007
2810029C07Rik	58.8142	-0.144265	0.729185	-0.197844	0.843167	0.959745	3.5518	2.65797	2.90833	3.15952	4.06271	2.97898
2810032G03Rik	57.3523	0.394744	0.738153	0.534772	0.592807	0.871973	7.94403	5.37138	6.24167	7.92891	3.47795	3.62462
2810047C21Rik1	298.872	0.943583	0.341232	2.76522	0.00568846	0.0676672	15.7603	14.1447	11.6741	9.05011	6.98846	7.45745
2810049E08Rik	NA	NA	NA	NA	NA	NA	0	0	0	0.127859	0	0
2810403D21Rik	49.7426	0.127958	0.777704	0.164534	0.869311	0.967905	11.244	5.69995	4.0623	10.881	5.61101	4.68825
2810404M03Rik	NA	NA	NA	NA	NA	NA	0	0	0	0	0.0938159	0
2810405F15Rik	NA	NA	NA	NA	NA	NA	0.0768274	0	0	0	0.0717184	0.0538216
2810408A11Rik	277.195	0.569439	0.35939	1.58446	0.113088	0.422878	25.8909	18.4998	21.4124	15.5232	16.3959	15.7891
2810408I11Rik	175.317	0.0561128	0.434309	0.1292	0.897199	0.975979	54.8263	38.3064	44.0376	49.8604	49.2937	56.3217
2810410L24Rik	64.5558	0.825881	0.708805	1.16517	0.243949	0.614384	5.45454	5.37037	5.3281	4.42674	2.36068	4.05306
2810414N06Rik	34.1149	-1.06831	0.983777	-1.08592	0.277513	0.648215	3.19088	0.888809	0.862397	4.03847	3.40203	4.59479
2810429I04Rik	48.4254	-0.25089	0.802437	-0.312661	0.754538	0.93404	17.8308	20.4579	18.7152	29.8695	24.472	28.4303
2810433D01Rik	1223.81	3.66713	2.14684	1.70815	0.0876078	0.37246	209.765	172.096	1.56565	272.845	0.955102	2.0799
2810442N19Rik	NA	NA	NA	NA	NA	NA	0	0	0	0	0	0
2810454H06Rik	43.0823	0.19909	0.843413	0.236053	0.813392	0.949618	2.08104	1.55075	0.761828	1.39485	1.92724	1.69835
2810459M11Rik	28.8988	-0.187599	1.01242	-0.185297	0.852996	0.961506	0.532796	1.08732	1.32531	0.71046	1.17776	0.330195
2810468N07Rik	92.6625	0.319105	0.58311	0.547246	0.58421	0.869303	10.9807	7.14207	8.38909	10.1323	5.65537	6.97153
2810471M01Rik	5.45379	1.91105	2.49156	0.767008	0.443077	NA	0.42087	0.452178	0.288277	0.834481	0	0.289297
2900005J15Rik	55.5899	0.223617	0.736952	0.303435	0.761558	0.935806	3.51438	3.03549	2.32861	2.94373	2.95038	2.08903
2900009J06Rik	1.42092	3.20909	4.6865	0.684752	0.4935	NA	2.41426	1.47451	2.75348	0	0	4.32459
2900011O08Rik	47.7511	-0.0233365	0.798814	-0.029214	0.976694	0.994132	2.42146	1.62622	1.79413	3.00393	1.48132	1.51801
2900026A02Rik	496.555	-1.05743	0.274472	-3.85258	0.000116879	0.00371606	6.26599	4.1321	5.26328	13.0293	9.04922	5.72704
2900040C04Rik	NA	NA	NA	NA	NA	NA	0	0	0	0	0	0
2900041M22Rik	149.046	-0.0314591	0.465206	-0.067624	0.946085	0.988012	19.6999	10.8772	7.69148	19.4213	13.1593	13.1693
2900052L18Rik	181.4	0.28425	0.440335	0.64553	0.518584	0.832622	2.70713	3.50014	2.74941	2.9784	2.35306	2.64554
2900052N01Rik	2.64362	0.0661044	3.01205	0.0219467	0.98249	NA	0.0742949	0.0989581	0.0387268	0.0404453	0.170646	0.154155
2900055J20Rik	NA	NA	NA	NA	NA	NA	0.745609	0.322316	0	1.0927	0.253535	0
2900057B20Rik	NA	NA	NA	NA	NA	NA	0	0	0	0.559585	0	0
2900060B14Rik	20.5993	0.364074	1.19313	0.305142	0.760258	0.935702	9.45187	10.4556	6.00241	11.4064	7.22809	10.4871
2900076A07Rik	50.3864	-0.311198	0.771926	-0.403145	0.686842	0.910871	12.0084	8.16979	3.16283	14.2462	12.6209	8.28596
2900079G21Rik	NA	NA	NA	NA	NA	NA	0	0	0	0	0.151357	0
2900092C05Rik	6.65575	3.25139	2.28384	1.42365	0.154548	NA	1.805	1.84441	4.00355	0.220217	0.175128	0
2900092D14Rik	4.40237	0.137113	2.37696	0.0576842	0.954	NA	0.091498	0.241929	0.17289	0.109068	0.188565	0.097577
2900093K20Rik	132.865	0.529567	0.499082	1.06108	0.288652	0.659471	72.3432	65.3669	40.5766	64.9794	47.9181	49.015
2900097C17Rik	5669.51	-0.429464	0.142819	-3.00706	0.00263787	0.0391218	86.8589	90.9661	105.701	112.603	137.598	81.8564
3000002C10Rik	17.5443	2.58913	1.30483	1.98426	0.0472263	0.259727	4.41815	2.79264	1.00565	0.815515	0.47938	0.655658
3010001F23Rik	NA	NA	NA	NA	NA	NA	0	0	0.179899	0.55995	0.335254	0
3010003L21Rik	151.352	0.527446	0.470565	1.12088	0.26234	0.632518	12.4538	13.8284	12.7352	10.9383	8.7293	8.8558
3100003L05Rik	NA	NA	NA	NA	NA	NA	0	0	0	0	0	0
3110009E18Rik	78.3636	0.547818	0.629515	0.870222	0.384179	0.745124	37.75	36.1494	29.4943	23.1041	18.3045	24.7353
3110009F21Rik	NA	NA	NA	NA	NA	NA	0	0	0	0	0.0634664	0
3110015C05Rik	1.98791	2.05498	3.62925	0.566226	0.57124	NA	0.646597	0.577435	0.297024	0.274542	0.121583	0
3110021A11Rik	56.8181	0.860342	0.734776	1.17089	0.241643	0.611087	18.5015	13.1824	8.61885	12.3918	7.1584	7.60842
3110039I08Rik	1.65579	-3.47192	4.74286	-0.732032	0.464149	NA	0	0	0.81017	0.705696	0.0894932	0
3110039M20Rik	NA	NA	NA	NA	NA	NA	0.183593	0.241354	0	0	0	0
3110040N11Rik	232.34	0.522895	0.382828	1.36587	0.171979	0.524494	51.4804	51.6877	42.7476	41.6977	35.9345	46.5015
3110045C21Rik	236.475	0.148556	0.380113	0.390821	0.69593	0.915338	36.1022	21.0988	25.6347	30.5886	23.1535	25.4344
3110056K07Rik	257.967	0.321829	0.363109	0.886314	0.375448	0.739778	43.7013	27.4682	23.2946	38.6343	22.545	26.8517
3110070M22Rik	30.6904	1.98064	1.01619	1.94908	0.0512858	0.273126	4.97206	8.03155	5.34478	2.14044	1.38705	0.515003
3110082I17Rik	916.099	0.041598	0.216745	0.191921	0.847804	0.960469	74.5031	66.5911	70.0213	77.3405	68.2718	63.081
3110082J24Rik	22.7643	-0.275316	1.14254	-0.240968	0.80958	0.948292	5.79244	2.70745	5.63252	6.10835	4.68771	7.26682
3110099E03Rik	2.36842	1.57311	3.52847	0.445834	0.655717	NA	0.0754199	0.0502611	0.314557	0	0.0696383	0.0260719
3200001D21Rik	6.22846	-1.80571	2.12656	-0.849123	0.395813	NA	0.203852	0.0696963	0.0552811	0.722288	0.23706	0.362107
3300002I08Rik	4.77962	-0.444204	2.30898	-0.192381	0.847444	NA	1.01659	1.15488	1.90117	1.63454	2.36859	2.2707
3300002P13Rik	12.2768	0.39239	1.55031	0.253105	0.800187	NA	1.53453	0.77269	1.74201	1.69113	0.457818	2.44294
3300005D01Rik	NA	NA	NA	NA	NA	NA	0	0	0	0.138412	0.73437	0
3425401B19Rik	2.75499	-2.42472	3.23081	-0.750499	0.452954	NA	0.0499046	0	0.0481043	0.113387	0.0576335	0.0114946
3632454L22Rik	8.72198	-0.0424217	1.7455	-0.0243034	0.980611	NA	0.27284	0.400582	0.182811	0.443467	0.344329	0.269546
3830403N18Rik	461.502	-0.29075	0.286084	-1.01631	0.309483	0.681727	55.1601	51.385	59.8498	76.9446	63.6478	67.6143
3830406C13Rik	572.051	0.0851271	0.259337	0.328248	0.742724	0.930194	22.9061	23.8374	24.0577	21.7251	24.9449	23.5448
3830408C21Rik	91.1765	-0.0672715	0.583699	-0.11525	0.908247	0.978732	5.31623	5.57579	4.22324	5.4868	6.61199	4.56328
3830417A13Rik	117.019	-1.53134	0.565584	-2.70754	0.0067784	0.0763301	4.05372	2.7579	6.63015	7.86588	13.4843	11.0302
3830432H09Rik	3.42114	-3.28746	3.01302	-1.09108	0.275236	NA	0.0403976	0	0.126915	0.530407	0.0755532	0.084555
3930402G23Rik	3.7495	1.82553	2.60819	0.699921	0.483977	NA	0.284645	0.138123	0.146027	0.103782	0.0324844	0.0442297
4430402I18Rik	110.531	1.18442	0.554341	2.13663	0.0326282	0.206252	5.41587	8.35417	10.1442	3.28513	2.99316	2.47403
4631405J19Rik	NA	NA	NA	NA	NA	NA	0	0	0	0.112797	0	0
4632404H12Rik	371.269	0.544761	0.312798	1.74158	0.0815825	0.360246	13.7489	15.2375	13.3885	10.8395	9.98647	10.5621
4632415L05Rik	104.351	-0.167526	0.551295	-0.303878	0.761221	0.935806	2.9092	1.74427	2.41585	3.05274	2.28216	1.78949
4632427E13Rik	121.109	-0.46734	0.515935	-0.905812	0.365036	0.731792	40.3821	28.9154	30.8935	50.3995	57.6035	32.355
4632428C04Rik	3.28942	-1.62347	2.75561	-0.589151	0.55576	NA	0.0405084	0.106897	0.0425668	0.178088	0.262642	0.168933
4732414G09Rik	NA	NA	NA	NA	NA	NA	0	2.02547	0	0	0	0
4732416N19Rik	8.4101	0.140834	1.829	0.0770009	0.938623	NA	3.22436	4.9661	4.78281	7.71506	2.43658	6.00611
4732471J01Rik	95.4406	-0.313557	0.598029	-0.524316	0.600058	0.875218	5.62276	2.31763	4.00575	5.68375	4.18032	3.54177
4732490B19Rik	14.9748	-2.00199	1.46748	-1.36424	0.172493	NA	0.122809	0.324578	0.727375	1.29409	0.570842	0.657181
4732491K20Rik	38.7685	-0.861823	0.891575	-0.96663	0.333729	0.705153	0.642134	0.733355	1.52268	1.02014	1.66041	1.17537
4831407H17Rik	NA	NA	NA	NA	NA	NA	0	0	0	0.573768	0	0
4831440E17Rik	281.262	0.115528	0.350417	0.329687	0.741637	0.929574	8.23843	4.37121	5.35667	7.24434	4.5801	3.45663
4833411C07Rik	NA	NA	NA	NA	NA	NA	0.0978486	0	0	0	0.0924631	0
4833412C05Rik	23.3006	0.462624	1.12428	0.411484	0.680717	0.908127	4.59722	2.5175	2.68604	4.3562	1.60087	2.35351
4833415N18Rik	3.75972	-0.249428	2.54956	-0.097832	0.922066	NA	0.417987	0.716867	0.150809	1.23783	0.411133	0.296454
4833417C18Rik	187.891	0.526798	0.417709	1.26116	0.207251	0.572112	20.8119	18.6751	17.836	15.5499	13.6471	12.6806
4833418N02Rik	7.41817	-0.453633	1.90417	-0.238231	0.811702	NA	0.395076	0.414353	1.15697	0.516592	0.66934	0.38937
4833419F23Rik	66.6136	0.0490806	0.684031	0.071752	0.942799	0.98714	14.6301	10.1192	15.6347	12.5479	12.3782	10.9632
4833420G17Rik	1980.72	0.372354	0.170564	2.18307	0.0290306	0.193311	87.9396	91.0419	73.2616	69.058	76.4008	55.4528
4833422C13Rik	2.26603	2.61737	3.75053	0.697867	0.48526	NA	0.118892	0.402263	0	0	0.114297	0.16934
4833422M21Rik	8.18303	-0.271411	1.81057	-0.149904	0.880841	NA	0.672582	0.554561	0.0879059	0.64211	0.949089	1.17717
4833423E24Rik	NA	NA	NA	NA	NA	NA	0	0.0848903	0	0	0.240784	0.0899412
4833427F10Rik	15.8237	-0.127867	1.34791	-0.0948632	0.924423	NA	1.52671	1.05567	0.757545	2.56418	0.841838	1.01847
4833427G06Rik	6.54861	1.00973	2.06019	0.490118	0.62405	NA	0.630195	2.45835	3.10278	0.46115	1.05124	0.609949
4833428L15Rik	NA	NA	NA	NA	NA	NA	0	0	0.100417	0.209288	0	0.269161
4833438C02Rik	31.6186	-0.582959	1.00055	-0.582638	0.560137	0.855565	0.909947	2.62012	2.32782	2.56307	2.32259	2.19903
4833439L19Rik	6834.42	-0.137236	0.136692	-1.00398	0.315386	0.686322	218.006	263.691	246.46	238.029	327.025	272.564
4921501E09Rik	11.746	5.92772	4.79908	1.23518	0.216765	NA	0.0234178	1.02846	0.585651	0	0	0
4921504A21Rik	6.97847	-0.230417	1.94486	-0.118475	0.905691	NA	0.501553	0.200241	0.471828	0.550207	0.27916	0.146867
4921504E06Rik	6.72355	-0.111241	2.3372	-0.0475958	0.962038	NA	0	1.10845	0.599644	0.170876	0.145305	0.0725763
4921507G05Rik	21.9343	0.300494	1.15852	0.259378	0.795344	0.943122	1.02429	1.80714	2.79228	0.971836	1.40616	1.00125
4921507P07Rik	204.252	0.865206	0.408926	2.1158	0.0343619	0.213193	11.4672	10.2523	17.3169	5.69178	6.83734	2.46443
4921508D12Rik	NA	NA	NA	NA	NA	NA	0.256435	0	0	0.28044	0	0
4921509C19Rik	3.1022	2.84621	3.35727	0.847775	0.396563	NA	0.145932	0.183213	0.20997	0.108041	0	0
4921509O07Rik	NA	NA	NA	NA	NA	NA	0	0	0	0	0	0
4921511C10Rik	14.5795	-1.52269	1.41354	-1.07721	0.281385	NA	0.550243	0.725331	1.07453	2.49512	1.48873	0.721051
4921511C20Rik	NA	NA	NA	NA	NA	NA	0	0	0.0730031	0	0.195495	0
4921511I17Rik	5.70476	0.183517	2.14324	0.0856259	0.931764	NA	1.00782	0.254022	0.473215	0.704278	0.34056	0.33073
4921511M17Rik	2.95692	0.598735	2.95572	0.202568	0.839473	NA	0.129249	0.498897	1.23938	0.224065	0.234429	0.226452
4921513H07Rik	NA	NA	NA	NA	NA	NA	0	0	0.262281	0	0.252709	0.1814
4921513I03Rik	14.2467	0.31248	1.41381	0.221019	0.825078	NA	0.854547	2.12801	2.90503	0.876652	0.98103	0.72075
4921515E04Rik	19.6564	-0.497949	1.21902	-0.408481	0.68292	0.908891	0.766012	0.717103	0.643603	1.63255	0.745319	0.741091
4921517D22Rik	26.8176	4.53002	1.25766	3.60194	0.000315853	0.00783867	1.48773	1.56185	1.71508	0.0401958	0.100467	0.0763226
4921518K17Rik	58.5715	0.488297	0.745003	0.65543	0.512191	0.829902	1.92736	1.85935	1.55601	2.14	0.927514	1.09113
4921524J17Rik	406.136	-0.15401	0.301045	-0.511585	0.608941	0.879037	30.7855	24.3874	27.5157	32.1622	32.1706	28.753
4921524L21Rik	11.8261	4.06698	1.86685	2.17853	0.0293667	NA	1.30001	2.12224	1.67745	0	0.378484	0.261563
4921525O09Rik	NA	NA	NA	NA	NA	NA	0	0	0	0	0.0270712	0
4921529L05Rik	3.73439	1.45748	2.62464	0.555307	0.578685	NA	0.474969	0.134017	0.110728	0.0594745	0.144359	0.103034
4921530L21Rik	17.8591	3.58804	1.57812	2.27362	0.022989	0.167621	0.743317	4.22483	7.34737	0.135395	0.241287	0.17745
4921531C22Rik	360.354	-0.355732	0.313626	-1.13425	0.256688	0.626848	16.1015	17.4299	17.2499	21.641	23.8486	26.211
4921531P14Rik	58.1831	0.20386	0.723492	0.281773	0.778118	0.937922	51.0211	39.0495	41.6713	52.3485	47.6974	30.2113
4921533I20Rik	NA	NA	NA	NA	NA	NA	0	0	0	0	0	0
4921534H16Rik	7.01385	0.793537	1.94679	0.407613	0.683558	NA	0.332497	0.221394	0.382668	0.145294	0.184051	0.137827
4921536K21Rik	59.6892	0.0868005	0.749353	0.115834	0.907784	0.978525	2.35187	1.26013	4.10109	1.48526	1.98509	1.94633
4921539E11Rik	39.1353	4.66651	1.05738	4.41328	1.01818e-05	0.000502843	3.14286	2.87052	3.62515	0.0940912	0.159347	0.0896755
4922502B01Rik	6.5607	0.342425	1.98599	0.17242	0.863107	NA	0.479276	0.353224	0.222752	0.465785	0.24819	0.332516
4922502D21Rik	373.011	2.78497	0.340294	8.18401	2.74544e-16	1.04299e-13	38.1989	44.2108	72.0838	7.33327	5.38512	2.30774
4922502H24Rik	NA	NA	NA	NA	NA	NA	0	0	0	0	0	0
4922502N22Rik	20.5853	-0.507045	1.19061	-0.42587	0.670202	0.904676	2.21443	1.46052	2.20711	3.86827	1.92397	2.19878
4930401C15Rik	NA	NA	NA	NA	NA	NA	0	0	0	0	0	0
4930401O10Rik	NA	NA	NA	NA	NA	NA	0.439571	0	0.232071	0	0	0
4930401O12Rik	NA	NA	NA	NA	NA	NA	0	0.232201	0	0	0.173266	0
4930402F06Rik	NA	NA	NA	NA	NA	NA	0	0.494016	0	0	0.0891364	0.0657194
4930402F11Rik	5.88002	-2.38661	2.41135	-0.989743	0.3223	NA	0.954664	0	0.716134	1.94437	0.666827	0.676847
4930402H24Rik	1837.61	-0.522707	0.194468	-2.68788	0.0071907	0.0793279	25.2025	17.5693	22.3373	31.0521	32.1414	22.1112
4930402K13Rik	0.834818	1.58087	4.97377	0.317842	0.750605	NA	0	0.0772693	0.122055	0	0	0.081157
4930404A05Rik	NA	NA	NA	NA	NA	NA	0.272282	0.352533	0.288765	0	0	0
4930404H11Rik	NA	NA	NA	NA	NA	NA	0.231698	0	0	0	0.703157	0.337992
4930404I05Rik	9.42982	-0.564851	1.69527	-0.333192	0.738989	NA	1.14805	1.12875	0.900723	2.35615	1.38804	1.32118
4930404N11Rik	3.58672	3.41391	3.78903	0.900999	0.367589	NA	0	3.20395	2.65746	0	0	0
4930405A10Rik	NA	NA	NA	NA	NA	NA	0	0	0.156509	0.487258	0	0
4930405A21Rik	9.20497	-0.143628	1.79572	-0.0799838	0.93625	NA	2.01133	0.403926	1.96051	0.854683	1.52997	1.89888
4930405D11Rik	NA	NA	NA	NA	NA	NA	0.681247	0.438953	1.45329	0.751229	0	0
4930405J17Rik	NA	NA	NA	NA	NA	NA	0	0	0	0.408563	0	0
4930405L22Rik	NA	NA	NA	NA	NA	NA	0	0	0.503699	0.517514	0	0
4930405O22Rik	2.90296	2.17971	2.96135	0.736051	0.4617	NA	1.02797	0.387134	0.772614	0.160384	0.142956	0.103466
4930406D18Rik	14.0417	2.36347	1.56293	1.51221	0.130482	NA	4.66874	6.79129	10.5389	2.2485	0.608484	0
4930407G08Rik	NA	NA	NA	NA	NA	NA	0	1.10599	0.302563	0	0	0
4930407I10Rik	46.6071	4.40043	1.1672	3.77006	0.000163209	0.00479781	0.368931	1.61049	3.33731	0.0635151	0.0179208	0
4930407I19Rik	1.86751	3.49052	4.09649	0.852077	0.394171	NA	0.585492	0.773783	0.1546	0	0.142238	0
4930412B13Rik	NA	NA	NA	NA	NA	NA	0	0	0	0	0	0
4930412C18Rik	140.604	0.716766	0.490775	1.46048	0.144158	0.479428	5.06063	3.67121	2.16953	4.04585	1.83324	2.37306
4930412O13Rik	4.86863	1.71128	2.3016	0.74352	0.457167	NA	0.217083	0.15834	0.175925	0.0789247	0.0445433	0.0336216
4930413E15Rik	NA	NA	NA	NA	NA	NA	0	0.116133	0	0	0	0
4930413F20Rik	2.39523	2.60656	3.4244	0.761173	0.446554	NA	0.200014	0.853325	0.413816	0	0.250821	0.093401
4930413G21Rik	233.149	0.563684	0.388785	1.44986	0.147098	0.484598	31.4207	25.8758	21.1015	26.5289	16.3195	17.6642
4930413M19Rik	NA	NA	NA	NA	NA	NA	0	0.54236	0	0	0	0
4930414N06Rik	4.52826	3.92656	2.93144	1.33947	0.180419	NA	2.54589	2.78969	5.64194	0.616761	0	0
4930415L06Rik	NA	NA	NA	NA	NA	NA	0	0	0	0	0	0
4930415O20Rik	5.09409	1.47745	2.29566	0.643587	0.519843	NA	2.54454	4.53836	4.40502	0.56456	3.58066	0.7909
4930417O13Rik	NA	NA	NA	NA	NA	NA	0	0	0	0	0	0.0876137
4930417O22Rik	5.10223	-0.767268	2.27134	-0.337804	0.735511	NA	0.311789	0.278943	0.49027	0.5747	0.500785	0.892017
4930419G24Rik	NA	NA	NA	NA	NA	NA	0	0	0	0	0	0
4930422M22Rik	6.36422	1.32128	2.04442	0.646286	0.518094	NA	1.05916	1.60428	1.147	0.296681	1.05933	0.0961243
4930423M02Rik	2.08093	4.35252	4.31911	1.00774	0.313581	NA	0.103657	0.959404	0.217687	0	0	0
4930425K10Rik	NA	NA	NA	NA	NA	NA	0.249261	0.646479	0.527684	0	0.254366	0
4930425L21Rik	NA	NA	NA	NA	NA	NA	0	0	0	0	0	0
4930425O10Rik	6.50043	-0.155954	1.98557	-0.0785436	0.937396	NA	0.821652	0.434928	0.432087	0.809225	0.62313	0.172612
4930426D05Rik	NA	NA	NA	NA	NA	NA	0	0	0	0	0	0.0501032
4930426L09Rik	NA	NA	NA	NA	NA	NA	0.156848	0	0.245557	0	0.149233	0.0552106
4930428D20Rik	2.07972	3.71245	4.0089	0.926053	0.354419	NA	1.20417	1.52447	3.94003	0	0	0.956716
4930428E07Rik	NA	NA	NA	NA	NA	NA	0	0	0.875219	0	0	0
4930428G15Rik	NA	NA	NA	NA	NA	NA	0	0	0	0	0	0
4930428O21Rik	6.86617	-0.108193	1.95457	-0.0553543	0.955856	NA	0.369878	0.407906	0.71096	0.336629	0.575622	0.172535
4930429B21Rik	12.1164	0.246771	1.52852	0.161445	0.871743	NA	0.955002	0.443388	0.936767	1.03931	0.313177	0.431627
4930429D17Rik	NA	NA	NA	NA	NA	NA	0	0.0877805	0	0	0	0.0462947
4930429F11Rik	NA	NA	NA	NA	NA	NA	0	0	0.276094	0	0	0
4930429F24Rik	7.59669	-0.72001	1.88116	-0.382749	0.701906	NA	0.289999	0.481215	0.45651	0.475402	0.893515	0.708705
4930429H19Rik	489.274	0.560624	0.286807	1.95471	0.0506176	0.271034	28.3487	34.984	31.5648	23.705	21.4085	25.4686
4930430A15Rik	16.6861	2.01075	1.42002	1.416	0.156776	NA	0.569999	1.97271	2.62084	0.249482	0.319246	0
4930430F08Rik	351.438	0.425584	0.316406	1.34506	0.178607	0.535099	16.9165	17.4457	17.8322	13.3198	13.3191	12.3115
4930430F21Rik	NA	NA	NA	NA	NA	NA	0	0.269737	0.217303	0.450709	0	0
4930430J02Rik	NA	NA	NA	NA	NA	NA	0	1.93722	0	1.83255	0	0
4930431F12Rik	35.4011	0.369338	0.996807	0.370521	0.710994	0.919792	2.24153	1.69436	0.625435	4.23832	0.536574	0.609396
4930431P03Rik	NA	NA	NA	NA	NA	NA	0.0438338	0	0.0457579	0	0.0812795	0
4930431P22Rik	NA	NA	NA	NA	NA	NA	0.271418	0.702871	0	0	0	0.199723
4930432J09Rik	6.36335	-1.41907	2.17426	-0.652667	0.513971	NA	0.0903548	0.120138	0.251631	0.590551	0.139254	0
4930432K21Rik	905.797	-0.241824	0.228015	-1.06056	0.288889	0.659808	36.0264	31.1484	31.8409	37.988	45.5299	38.3839
4930432L08Rik	30.0875	-0.300154	0.991459	-0.30274	0.762088	0.935806	1.82929	1.967	2.06462	2.68124	2.22594	1.91372
4930432M17Rik	NA	NA	NA	NA	NA	NA	0	0	0	0.257167	0	0
4930432O09Rik	3.34432	0.542166	2.84606	0.190497	0.84892	NA	0.204381	0.20314	0.321666	0.224029	0.0961355	0
4930433B08Rik	NA	NA	NA	NA	NA	NA	0	0	0	0	0	0
4930433I11Rik	6.13088	2.29768	2.16035	1.06357	0.287525	NA	0.378141	0.775976	0.466449	0.241513	0.0532792	0.0360469
4930433N12Rik	61.0865	-0.657501	0.715432	-0.919026	0.358082	0.727147	3.04314	4.80131	4.01546	6.07946	6.75202	5.30406
4930434J06Rik	4.3297	2.63287	2.75039	0.957272	0.33843	NA	1.12183	0.092787	0.367325	0.229213	0	0.0488316
4930435E12Rik	30.4263	4.33257	1.17469	3.68827	0.000225786	0.00617205	4.40774	3.45766	6.68054	0.178822	0.229811	0.0572027
4930435F18Rik	137.851	-0.377079	0.494723	-0.762202	0.445939	0.788771	12.4281	5.01246	6.00099	20.7536	5.56781	3.89106
4930438E09Rik	NA	NA	NA	NA	NA	NA	0	0.276744	0.477902	0	0.456363	0.494313
4930440C22Rik	NA	NA	NA	NA	NA	NA	0.0696523	0.468067	0	0	0	0.0482725
4930440I19Rik	3.74257	0.90318	2.69383	0.335278	0.737416	NA	0.132036	1.21778	0.978784	0.436323	0.129797	0.0951078
4930441H08Rik	NA	NA	NA	NA	NA	NA	0	0	0	0	0	0
4930441J16Rik	NA	NA	NA	NA	NA	NA	0.724512	0	1.59712	0	0	0
4930442J19Rik	13.9931	2.02665	1.49071	1.35952	0.173983	NA	1.35945	2.20863	1.79934	0.524952	0.415031	0
4930442L01Rik	27.3922	1.68654	1.07872	1.56347	0.117942	0.432457	1.60191	2.05175	2.97793	0.328152	1.02357	0.279505
4930443O20Rik	1.678	3.15393	4.30875	0.731983	0.464179	NA	0.235237	0.310106	0.164448	0.0860105	0	0
4930444F02Rik	13.6047	1.07593	1.43719	0.748639	0.454075	NA	0.727118	1.33986	0.83688	0.511409	0.789779	0.262273
4930444G20Rik	6.447	6.16851	2.62114	2.35337	0.0186043	NA	0.584929	0.944717	0.61523	0	0	0.138249
4930444M15Rik	NA	NA	NA	NA	NA	NA	0	0	0.277141	0	0	0
4930444P10Rik	15.3053	1.40157	1.37649	1.01822	0.308572	NA	1.83178	3.40635	3.76301	0.895209	1.3452	0.475473
4930445N18Rik	NA	NA	NA	NA	NA	NA	0	0	0.17808	0	0	0
4930447A16Rik	NA	NA	NA	NA	NA	NA	0	0	0	0	0	0
4930447C04Rik	932.692	-0.347868	0.220888	-1.57486	0.115288	0.427656	59.1401	40.1005	37.6294	70.2394	59.9102	45.33
4930447F24Rik	NA	NA	NA	NA	NA	NA	0	0	0	0	0	0.164387
4930447J18Rik	NA	NA	NA	NA	NA	NA	0	0	0.19252	0.200646	0	0
4930447K03Rik	4.76826	-0.927318	2.30776	-0.401826	0.687812	NA	0.540444	0.357505	1.01012	0.899193	0.917429	0.289105
4930447M23Rik	NA	NA	NA	NA	NA	NA	0	0.0579303	0.182974	0.0957308	0	0
4930447N08Rik	2.98566	1.72118	2.96772	0.579967	0.561937	NA	0.779781	0.146523	0.367986	0.125797	0.110451	0.471119
4930448C13Rik	2.66693	0.847969	3.15132	0.269084	0.787865	NA	0.624254	0.808628	1.10537	0.456266	0.41936	0
4930448F12Rik	NA	NA	NA	NA	NA	NA	0	0	0.194228	0	0	0
4930448H16Rik	1.88026	-1.07353	3.83847	-0.279676	0.779726	NA	0.830062	0	1.78193	0.458878	0.923591	0.946556
4930448I06Rik	NA	NA	NA	NA	NA	NA	0	0.623263	0	0	0	0
4930448I18Rik	NA	NA	NA	NA	NA	NA	0	0	0.270277	0.561158	0	0.187122
4930448K20Rik	11.7734	2.46067	1.64919	1.49204	0.135688	NA	1.34239	1.52243	2.14945	0.299785	0.25368	0
4930449E01Rik	1.17124	4.02782	4.82789	0.834281	0.404123	NA	0.8382	1.61159	0.450005	0	0	0
4930449E18Rik	NA	NA	NA	NA	NA	NA	0	0	0	0	0	0
4930449I24Rik	2.00203	-0.254211	4.41453	-0.057585	0.954079	NA	0	0.304131	0.551775	0.428849	0	0
4930451G09Rik	157.277	0.152267	0.458172	0.332335	0.739636	0.928839	4.38732	6.66414	5.36462	4.71762	5.55643	5.0177
4930451I11Rik	3.01941	4.4985	3.4575	1.30108	0.19323	NA	3.02614	2.84385	7.52521	0	0	0.623845
4930452A19Rik	NA	NA	NA	NA	NA	NA	0	0	0	0	0	0
4930452B06Rik	1406.37	0.286257	0.18808	1.522	0.12801	0.451034	59.9109	54.1639	55.7234	49.8168	48.3515	40.618
4930452G13Rik	29.0184	3.09974	1.07258	2.88997	0.00385281	0.0507857	10.502	3.57325	4.34408	1.29098	0.455604	0.667805
4930452N14Rik	NA	NA	NA	NA	NA	NA	0	0	0	0	0.438314	0.301104
4930453H23Rik	3.64798	4.83408	3.42593	1.41103	0.158236	NA	0.546363	0.160296	0.63675	0	0	0
4930453L07Rik	2.94355	0.779579	2.91444	0.267489	0.789093	NA	0.465164	0.102362	0.406097	0.0846417	0.220999	0.109026
4930453N24Rik	1173.79	0.314428	0.200854	1.56545	0.117476	0.432323	123.137	111	131.584	97.5649	102.953	107.826
4930455B14Rik	12.1844	1.97126	1.62772	1.21105	0.225875	NA	0.93339	4.48143	1.84153	0.892553	0.340068	0.0827915
4930455C13Rik	11.1689	2.65646	1.64585	1.61404	0.106519	NA	3.23749	2.16589	2.75678	0.696674	0.316274	0.1156
4930455D15Rik	2.76882	1.96208	3.27956	0.598276	0.549656	NA	0.14366	0.191325	0.451925	0	0.135023	0.250519
4930455F16Rik	4.67962	1.79023	2.49514	0.717484	0.473075	NA	3.32486	0.376036	2.77999	0.640222	0.303053	0.205251
4930455G09Rik	9.61789	1.12838	1.67723	0.672768	0.501095	NA	5.92184	4.75995	2.77034	3.2685	2.41187	2.78486
4930455H04Rik	NA	NA	NA	NA	NA	NA	0	0	0.183979	0	0	0
4930455J16Rik	4.58656	2.18687	2.43851	0.896806	0.369822	NA	0.404684	0.445814	0.706009	0.147661	0.0631282	0.0945851
4930456L15Rik	NA	NA	NA	NA	NA	NA	0	0	0.114637	0	0	0
4930459C07Rik	NA	NA	NA	NA	NA	NA	0	0.138406	0.110612	0	0	0.0744552
4930459L07Rik	NA	NA	NA	NA	NA	NA	0	0	0	0	0	0
4930461G14Rik	1.85316	1.99945	3.81119	0.524626	0.599843	NA	0.391686	0.512027	0.61752	0	0.451056	0.280452
4930463O16Rik	3.76903	0.0188192	2.5314	0.00743429	0.994068	NA	0.307446	0.11615	0.0918816	0.240192	0.163195	0.0922449
4930465K10Rik	28.5138	0.618314	1.02916	0.600794	0.547978	0.848274	2.28552	4.75441	4.13743	2.15824	2.50679	1.98951
4930465M20Rik	1.67632	-2.80117	4.29745	-0.651822	0.514516	NA	0	0.106843	0.172025	0.268676	0.312003	0
4930467D21Rik	31.4418	-0.514138	0.970564	-0.529731	0.596298	0.873202	0.888527	0.8037	0.661344	1.17676	1.34732	1.09153
4930467E23Rik	2.26386	0.263081	4.99733	0.0526443	0.958015	NA	0	0	0.491033	1.6251e-05	0	0
4930467J12Rik	NA	NA	NA	NA	NA	NA	0.62406	0	0	0	0	0
4930467K11Rik	2.02979	4.29799	4.34611	0.98893	0.322697	NA	0.789198	1.02245	1.39388	0	0	0
4930469K13Rik	28.4843	-1.1112	1.02497	-1.08414	0.278304	0.648769	7.97967	3.66277	3.2973	15.6822	11.2342	9.02093
4930470G03Rik	16.5471	-0.234012	1.32616	-0.176457	0.859935	NA	0.528365	0.338819	0.588573	0.449317	0.590727	0.575538
4930470H14Rik	564.037	0.0977589	0.259658	0.376491	0.706552	0.919512	63.5821	27.2282	23.0347	62.7073	27.3386	18.583
4930470O06Rik	NA	NA	NA	NA	NA	NA	0.326323	0	0.347651	0	0	0
4930470P17Rik	57.5774	0.0372402	0.72826	0.0511359	0.959217	0.990656	6.24417	4.38292	3.7529	7.105	4.11667	4.2129
4930471C04Rik	3.19453	0.267956	2.95648	0.0906336	0.927784	NA	0.534284	0.698097	0.562165	1.55674	0.176565	0
4930471G03Rik	10.1263	4.28063	2.06862	2.06932	0.0385162	NA	5.04776	6.10889	7.05178	1.04275	0	0
4930471G24Rik	NA	NA	NA	NA	NA	NA	0	0	0	0	0.301874	0
4930471M09Rik	4.6552	1.0063	2.35687	0.426964	0.669406	NA	1.48643	0.326112	0.781249	0.408395	0.355053	0.175171
4930473A02Rik	6.94431	1.01005	1.94436	0.519478	0.603428	NA	0.857197	0.878725	0.605154	0.626871	0.271445	0.203046
4930473O22Rik	2.35733	0.253728	4.14341	0.0612364	0.951171	NA	0	0.210002	0.744572	0.172687	0	0
4930474G06Rik	2.0995	0.461749	3.31833	0.139151	0.889331	NA	0.135451	0.0719183	0.0524149	0.131203	0.0404993	0.0644696
4930474H20Rik	NA	NA	NA	NA	NA	NA	0.0769332	0	0.0803477	0.168304	0	0
4930474M22Rik	NA	NA	NA	NA	NA	NA	0	0.510455	0	2.19699	0	0.301104
4930474N05Rik	1.2502	0.800529	4.84993	0.16506	0.868897	NA	0	0.47407	0.578328	0	0.19251	0.132007
4930474N09Rik	4.25896	4.9249	3.22861	1.5254	0.127161	NA	0.213013	1.26547	1.22892	0	0	0
4930477N07Rik	56.336	-0.677859	0.760705	-0.891092	0.37288	0.738186	24.117	7.62235	13.1127	29.3775	24.343	20.975
4930478L05Rik	7.95957	0.668741	1.81557	0.368336	0.712623	NA	0.806736	0.532656	0.422656	0.440319	0.432171	0.160643
4930478P22Rik	6.10238	2.67364	2.79624	0.956155	0.338994	NA	0	1.19922	0.583224	0	0.0474523	0
4930479D17Rik	4.04681	4.12868	2.87863	1.43425	0.151501	NA	1.99992	1.62085	1.85241	0	0.255203	0.366158
4930480E11Rik	NA	NA	NA	NA	NA	NA	0.233424	0	0.162741	0	0	0
4930480G23Rik	2.75204	0.941638	3.15587	0.298376	0.765416	NA	0.19078	0.505755	0.499791	0.31326	0.0904224	0
4930480K15Rik	2.82636	-0.950288	3.23304	-0.29393	0.768811	NA	0.290478	0	0.147794	0.165933	0.0903613	0.141622
4930480K23Rik	45.4665	0.734009	0.812719	0.903153	0.366445	0.732736	4.50607	2.95115	2.17945	4.10258	1.21746	1.49336
4930480M12Rik	NA	NA	NA	NA	NA	NA	0.562476	0	0	0	0	0
4930481A15Rik	124.05	0.397422	0.508882	0.78097	0.43482	0.781466	12.4313	8.15119	8.19346	7.51838	7.35568	11.033
4930482G09Rik	6.47016	2.53825	2.19615	1.15577	0.247775	NA	4.1748	0.480887	1.82048	0.203477	0.402768	0.26577
4930483J18Rik	10.3113	0.918889	1.65305	0.555873	0.578297	NA	1.77157	1.39424	1.24061	1.67967	0.453677	0.83575
4930483K19Rik	6.8666	1.87318	1.97119	0.950277	0.341971	NA	1.32497	1.06541	0.579814	0.359278	0.331478	0.316263
4930483O08Rik	1.0235	-0.737106	4.73009	-0.155834	0.876164	NA	0.121775	0.159115	0	0.266026	0.232562	0
4930484H19Rik	1.69696	-0.25625	4.6611	-0.0549764	0.956157	NA	0	0.256756	0	0.42548	0	0
4930486F22Rik	NA	NA	NA	NA	NA	NA	0	0	0.557553	0	0	0
4930486I03Rik	5.04082	4.05298	2.8492	1.4225	0.154882	NA	2.27922	0.821472	3.24152	0	0.221662	0
4930486L24Rik	1.98959	-4.34229	4.04078	-1.07462	0.282546	NA	0	0	0.0899465	0.374718	0.404771	0.180164
4930487D11Rik	NA	NA	NA	NA	NA	NA	0	0	0	0	0	0
4930487H11Rik	NA	NA	NA	NA	NA	NA	0	0	0.192613	0.600277	0	0
4930488B22Rik	NA	NA	NA	NA	NA	NA	0	0	0	0.0703924	0	0.0451886
4930488L21Rik	11.0801	4.42049	2.01636	2.19231	0.0283568	NA	0.373463	1.79489	1.82077	0	0.116088	0
4930500F04Rik	NA	NA	NA	NA	NA	NA	0	0	0.518427	0.532299	0	0
4930500G05Rik	10.7126	-1.64024	1.62607	-1.00871	0.313112	NA	0.788581	0.389874	0.207054	2.05059	1.70241	1.31487
4930500L23Rik	1.64916	-0.232445	3.87644	-0.0599637	0.952185	NA	0.739163	0.319577	0	0.812375	0.502146	0.180296
4930502A04Rik	NA	NA	NA	NA	NA	NA	0	0.226175	0	0	0	0
4930502E09Rik	6.95386	-0.666855	1.98413	-0.336095	0.736799	NA	1.19742	0.93232	1.77302	3.42085	0.972811	1.92476
4930502E18Rik	266.103	-0.206104	0.361627	-0.569936	0.568721	0.860867	17.0821	29.0439	26.5172	22.4428	33.8778	37.0851
4930503B20Rik	138.477	3.0993	0.52206	5.93668	2.9085e-09	3.42002e-07	34.8641	21.9929	49.8052	5.02346	2.36731	1.52124
4930503E14Rik	217.33	0.0252266	0.391604	0.0644185	0.948637	0.988536	21.4608	18.7211	24.9516	22.892	18.88	16.3458
4930503E24Rik	NA	NA	NA	NA	NA	NA	0	0	0.183541	0.192168	0.0828339	0.184187
4930503F20Rik	1.44308	2.49681	4.58158	0.544966	0.585777	NA	0.633307	0.817469	1.01123	0	0.334404	0
4930503H13Rik	NA	NA	NA	NA	NA	NA	0	0	0	0	0	0
4930503L19Rik	372.158	0.163727	0.313034	0.523031	0.600953	0.875545	23.342	14.9856	19.0554	19.3003	16.0243	9.64056
4930503O07Rik	1.01514	-2.18697	4.89219	-0.447033	0.654851	NA	0	0	2.04974	0.526285	0.546349	0
4930504C09Rik	NA	NA	NA	NA	NA	NA	0	0	0	0.427366	0	0
4930504O13Rik	44.0693	0.540051	0.82929	0.651221	0.514904	0.830764	22.6566	23.0002	14.6986	19.8599	17.2403	19.8812
4930505A04Rik	28.3093	2.85533	1.07551	2.65486	0.00793418	0.0851215	8.15366	6.27564	10.1149	1.23035	0.93573	0.683725
4930505G20Rik	NA	NA	NA	NA	NA	NA	0	0	0	1.74661	0	0
4930505K13Rik	NA	NA	NA	NA	NA	NA	0	0	0.624302	0	0	0
4930505K14Rik	NA	NA	NA	NA	NA	NA	0	0	0	0	0	0
4930505N22Rik	8.99155	0.29948	1.73343	0.172768	0.862834	NA	1.96784	1.60901	1.51097	2.35781	0.914518	1.30453
4930506A18Rik	2.45739	-2.99916	3.46217	-0.866266	0.386344	NA	0	0.186404	0.599033	0.623107	0.528874	0.200536
4930506C21Rik	9.40619	0.284505	1.71805	0.165597	0.868474	NA	1.08938	1.61711	2.28365	1.36306	0.913792	1.11159
4930507D05Rik	87.4915	0.023879	0.605626	0.0394286	0.968549	0.991614	3.29506	5.22151	5.14651	4.20313	4.4147	3.62864
4930507D10Rik	5.79728	5.65918	2.72236	2.07878	0.0376379	NA	1.08442	0.860032	1.59841	0	0	0.231259
4930509E16Rik	28.4349	-0.34405	1.01957	-0.337446	0.735781	0.927931	4.28039	2.11774	1.58094	4.45421	3.77866	2.41122
4930509G22Rik	65.0309	0.224458	0.686642	0.326892	0.74375	0.930378	3.42286	3.11434	1.82692	3.55715	2.41965	1.59041
4930509J09Rik	NA	NA	NA	NA	NA	NA	0	0.0977084	0.0768131	0.240447	0.0686157	0
4930509K18Rik	NA	NA	NA	NA	NA	NA	0.0580983	0.154051	0	0	0.271564	0
4930511A02Rik	2.44735	3.5977	3.78494	0.950532	0.341842	NA	0.0538154	0.213463	0.393077	0	0	0.112104
4930511A08Rik	NA	NA	NA	NA	NA	NA	0	0	0	0	0	0
4930511E03Rik	NA	NA	NA	NA	NA	NA	0	0	0	0	0	0
4930511M06Rik	266.794	-0.380319	0.360136	-1.05604	0.290948	0.662674	12.7749	8.38749	9.61112	18.4305	9.18801	5.50856
4930512B01Rik	1.85056	-0.443386	4.15297	-0.106763	0.914977	NA	0	0.492994	0	0.100826	0.178763	0.131559
4930512J16Rik	2.703	1.35027	3.52507	0.383048	0.701684	NA	0.11606	0.228474	0.181899	0	0.435961	0
4930512M02Rik	12.9899	-0.305314	1.48381	-0.205764	0.836976	NA	3.6334	2.36729	3.36241	7.37997	2.00885	2.08094
4930513D17Rik	1.10884	3.99789	4.8298	0.827754	0.40781	NA	0.310278	0.273317	0.108266	0	0	0
4930513N10Rik	128.799	-0.230089	0.506896	-0.453917	0.649889	0.895595	4.18046	5.17118	4.90511	6.33611	5.21165	3.04777
4930513O06Rik	NA	NA	NA	NA	NA	NA	0	0	0.427761	0	0	0
4930515B02Rik	NA	NA	NA	NA	NA	NA	0.438443	0.561247	0.943095	0	0	0
4930515G01Rik	25.6371	-0.278504	1.12798	-0.246905	0.804981	0.946849	1.17767	4.06133	3.59139	3.39643	2.43881	1.88464
4930515G16Rik	NA	NA	NA	NA	NA	NA	0	0	0	0	0	0
4930515L03Rik	NA	NA	NA	NA	NA	NA	0	0	0	0	0	0
4930515L19Rik	NA	NA	NA	NA	NA	NA	0	0	0	0	0	0
4930517E11Rik	NA	NA	NA	NA	NA	NA	0	0.100523	0.0792895	0.0823645	0	0
4930517M08Rik	NA	NA	NA	NA	NA	NA	0.152838	0.199696	0.321663	0.335793	0	0
4930518J21Rik	NA	NA	NA	NA	NA	NA	0	0	1.05537	0.541584	0.566288	1.13346
4930518P08Rik	5.80097	-1.28551	2.12881	-0.603866	0.545932	NA	0.511398	0.268438	0.215713	1.56957	0.586271	0.504746
4930519D14Rik	4.34262	2.50109	2.91536	0.857901	0.390947	NA	0.108896	1.14843	1.37776	0	0.20806	0
4930519F16Rik	9.32424	-1.57293	1.81022	-0.868914	0.384894	NA	1.13285	0.150484	1.67198	1.61893	1.30097	0.641492
4930519F24Rik	NA	NA	NA	NA	NA	NA	0	0.609787	0	0	0	0
4930519G04Rik	22.0799	0.0345264	1.17042	0.0294992	0.976466	0.994132	0.701026	1.67004	1.41546	1.24138	0.985013	0.552654
4930519H02Rik	8.30389	2.90549	2.14459	1.3548	0.175481	NA	1.46529	1.1524	3.85318	0.7986	0	0.10439
4930519K11Rik	NA	NA	NA	NA	NA	NA	0	1.30861	0	0	0	0
4930519L02Rik	16.6734	-0.697161	1.35175	-0.515747	0.606031	NA	4.991	5.04773	3.26124	18.2416	4.68046	4.48392
4930520O04Rik	40.6824	0.296707	0.862393	0.34405	0.730808	0.925984	4.85635	5.00668	4.8288	4.90514	4.06431	4.00491
4930520P13Rik	NA	NA	NA	NA	NA	NA	0	0	0.886076	0	0	0
4930521E06Rik	NA	NA	NA	NA	NA	NA	0	0	0	0	0	0
4930521O11Rik	28.8805	0.110182	1.03461	0.106496	0.915189	0.980775	2.7269	1.81602	1.1723	4.47934	1.06847	0.469858
4930521O17Rik	1.61256	0.84963	4.35889	0.194919	0.845456	NA	0.908637	2.25511	0	0	6.66125	1.55064
4930522H14Rik	9.50127	-0.74669	2.1757	-0.343194	0.731452	NA	0	4.59719	3.95861	1.92743	0.550225	0
4930522O17Rik	NA	NA	NA	NA	NA	NA	1.27379	1.55162	1.45725	0	0	0
4930522P08Rik	NA	NA	NA	NA	NA	NA	0	0	0	0	0	0
4930523C07Rik	9.72602	-1.06488	1.68007	-0.633829	0.526192	NA	0.174041	0.291468	0.385652	0.37238	0.799736	0.0172626
4930523O13Rik	7.13269	2.3737	2.02631	1.17144	0.241422	NA	1.70146	0.754615	0.887277	0.102885	0.444402	0.197062
4930524B15Rik	103.588	-0.900158	0.569893	-1.57952	0.114217	0.424864	2.66212	3.76565	3.30098	4.03189	9.55519	9.49031
4930524B17Rik	NA	NA	NA	NA	NA	NA	0.163748	0	0	0.0609716	0	0
4930524C18Rik	NA	NA	NA	NA	NA	NA	0	0.224655	0	0	0	0
4930524N10Rik	2.51505	2.9341	4.42356	0.663289	0.507146	NA	0	0.9209	1.35683	0	0	0
4930524O05Rik	0.684406	1.52519	4.9603	0.307479	0.758479	NA	0.440703	0	1.42221	0	0	0
4930524O08Rik	1.78455	-2.9659	4.17006	-0.711236	0.476938	NA	0.0809419	0	0.170096	0.354056	0.307568	0
4930525C09Rik	NA	NA	NA	NA	NA	NA	0	0.395827	0.325922	1.40702	0	0
4930525D18Rik	5.95977	1.1186	2.08345	0.536897	0.591339	NA	1.48571	1.16734	0.782744	0.978844	0.445336	0.528171
4930525G20Rik	17.0037	1.57554	1.33882	1.17681	0.239271	0.608433	0.894905	0.466653	1.23457	0.427623	0.118274	0.155426
4930526H09Rik	NA	NA	NA	NA	NA	NA	0	0	0.336464	0	0	0
4930526I15Rik	94.4108	0.258447	0.584556	0.442125	0.658399	0.898841	8.33045	12.1104	9.07525	9.35709	10.2943	8.30335
4930526L06Rik	2.5784	1.08044	3.07476	0.35139	0.725296	NA	0.810238	0.176589	0.426778	0.148277	0.264189	0.286719
4930527F14Rik	1.23274	3.51859	4.8508	0.725362	0.46823	NA	0.761096	0.328894	0.805918	0	0	0
4930527G23Rik	NA	NA	NA	NA	NA	NA	0.934388	0.596882	0.503699	0	0	0
4930528A17Rik	31.3012	0.512428	0.975398	0.525353	0.599338	0.875114	1.63036	2.12306	1.43855	1.48354	1.31485	1.63661
4930528D03Rik	20.8889	0.0364119	1.18178	0.0308111	0.97542	0.993799	2.01309	2.01348	2.69618	2.58393	1.61754	1.67073
4930528G23Rik	NA	NA	NA	NA	NA	NA	0	0	0	0	0	0.0434693
4930528H21Rik	NA	NA	NA	NA	NA	NA	0	0	0.877352	0.886931	0	0
4930528P14Rik	NA	NA	NA	NA	NA	NA	1.56849	3.92357	1.73758	0.878591	0	0
4930529C04Rik	24.5032	0.109445	1.09331	0.100105	0.920261	0.982385	0.656288	0.684149	0.798392	0.80087	0.532891	0.400822
4930529K09Rik	NA	NA	NA	NA	NA	NA	0	0	1.63412	0	0	0
4930529L06Rik	NA	NA	NA	NA	NA	NA	0	0	0	0	0	0
4930529N20Rik	NA	NA	NA	NA	NA	NA	0	0	0	0	0	0
4930532I03Rik	NA	NA	NA	NA	NA	NA	0.125759	0.13731	0.131417	0	0	0
4930532M18Rik	NA	NA	NA	NA	NA	NA	0	0	0	0	0	0
4930533B01Rik	NA	NA	NA	NA	NA	NA	0	0.156393	0.125835	0	0	0
4930533N22Rik	12.3665	-0.71712	1.50699	-0.475863	0.634172	NA	0.843696	0.540168	0.721215	1.9306	0.758482	0.527556
4930533P14Rik	NA	NA	NA	NA	NA	NA	0	0	0	0	0	0
4930534H03Rik	NA	NA	NA	NA	NA	NA	0	0	0	0	0	0.242112
4930539C22Rik	NA	NA	NA	NA	NA	NA	0	0	0.15508	0	0	0
4930539E08Rik	248.406	0.173072	0.370196	0.467515	0.640132	0.893281	6.30123	4.35309	5.27102	6.2335	3.79646	4.46152
4930539J05Rik	8.70094	0.523372	1.75089	0.298918	0.765002	NA	11.4492	5.73587	7.59665	7.69026	7.27985	3.78248
4930539M17Rik	NA	NA	NA	NA	NA	NA	0	0	0	0	0	0
4930539N22Rik	NA	NA	NA	NA	NA	NA	0	0	0	0	0	0
4930540M03Rik	NA	NA	NA	NA	NA	NA	0	0	0	0	0	0
4930542C21Rik	0.870412	2.06559	4.82593	0.428019	0.668638	NA	0.302634	0.198194	0.160534	0	0.149683	0
4930542D17Rik	NA	NA	NA	NA	NA	NA	0.197545	0	0	0	0	0.06084
4930542M03Rik	NA	NA	NA	NA	NA	NA	0	0	0	0	0	0
4930543E12Rik	8.16254	-0.066692	1.82112	-0.0366214	0.970787	NA	0.396283	0.945063	0.993164	0.780079	0.597796	0.222489
4930543N07Rik	2.06696	4.07835	4.33785	0.940178	0.347126	NA	0.649274	0.142703	0.568748	0	0	0
4930544D05Rik	30.453	4.63823	1.29933	3.56971	0.000357381	0.0086237	25.146	8.21228	26.4523	2.21791	0	0.250285
4930544G11Rik	40.5278	2.58686	0.919092	2.81459	0.004884	0.0606041	3.51503	5.61295	7.6925	0.429646	1.35021	0.654619
4930544M13Rik	NA	NA	NA	NA	NA	NA	0.0841254	0	0	0	0	0
4930545E07Rik	NA	NA	NA	NA	NA	NA	0	0.472841	0	0.584134	0	0
4930545H06Rik	1.53886	3.85027	4.51724	0.852351	0.39402	NA	0.230449	1.19693	0.487094	0	0	0.168038
4930545L23Rik	4.03199	-0.405203	2.71272	-0.149371	0.881261	NA	0.0388024	0.154519	0.526825	0.0846296	0.143611	0
4930546C10Rik	NA	NA	NA	NA	NA	NA	0	0.0582551	0.0920612	0.048124	0	0.0614067
4930546K05Rik	15.4514	0.0483636	1.35914	0.0355839	0.971614	NA	0.413227	0.32318	0.719111	0.378697	0.349632	0.335901
4930547E08Rik	6.76583	0.653593	1.9727	0.33132	0.740403	NA	7.17452	3.02848	2.60737	4.65761	2.95471	5.21985
4930547E14Rik	4.57211	0.0237669	2.48056	0.00958126	0.992355	NA	3.96342	1.43708	5.54068	2.51763	3.43249	0
4930548G14Rik	2.64419	3.8687	3.38721	1.14215	0.253392	NA	0.388929	0.772784	0.204388	0.106399	0	0.0684048
4930548H24Rik	4.09482	1.38434	2.70789	0.511224	0.609194	NA	0.16304	1.07125	0.34276	0.357463	0.0772691	0
4930548J01Rik	2.27409	2.25284	3.85036	0.585099	0.558481	NA	0.773182	0.333808	2.16596	0.282836	0	0
4930548K13Rik	NA	NA	NA	NA	NA	NA	0	0	0	0	0	0
4930549C15Rik	4.40616	-0.128812	2.39508	-0.0537818	0.957109	NA	0.554299	0.242484	0.582321	0.304768	0.620014	0.195578
4930549G23Rik	20.6742	0.891228	1.19169	0.747866	0.454541	0.794067	11.2742	10.801	15.7039	7.80606	6.46512	8.31893
4930550C14Rik	54.382	-0.60695	0.770521	-0.787714	0.430864	0.777695	3.02179	5.14929	5.31715	7.0455	5.85264	5.62459
4930550C17Rik	NA	NA	NA	NA	NA	NA	0	0	0	0	0	0
4930550L24Rik	1428.54	-0.637599	0.191785	-3.32455	0.000885614	0.0175184	78.5498	71.2298	80.6484	116.586	130.019	127.312
4930552N02Rik	2.32941	4.90806	4.09265	1.19924	0.230436	NA	0.700289	0.394977	0.314826	0	0	0
4930552P12Rik	19.123	0.650932	1.2381	0.52575	0.599062	0.87491	1.08667	1.06094	0.420449	0.440087	1.15704	0.477753
4930553C11Rik	1.5052	0.768808	4.21442	0.182423	0.855251	NA	0.216447	0.281323	0.228482	0.950534	0	0.314682
4930553E22Rik	NA	NA	NA	NA	NA	NA	0	0.76742	0	0	0	0
4930553J12Rik	NA	NA	NA	NA	NA	NA	0	0.378667	0	0	0	0
4930553P18Rik	7.81747	-0.174359	1.9166	-0.0909733	0.927514	NA	0.939611	0.141147	0.526229	0.343619	0.707391	0.306025
4930554C24Rik	NA	NA	NA	NA	NA	NA	0	0	0	0	0	0
4930554G24Rik	3.84452	-1.00023	2.62403	-0.381181	0.703069	NA	0.0677923	0.270686	0.212876	0.66637	0.127923	0.23716
4930554H23Rik	NA	NA	NA	NA	NA	NA	0.0382181	0	0	0	0	0.0264873
4930554I06Rik	1.32604	1.97389	4.40361	0.448244	0.653977	NA	0.425356	1.08996	0.456964	0	0.47596	0.972418
4930555B11Rik	NA	NA	NA	NA	NA	NA	0	0.292574	0.230941	0.16048	0	0
4930555B12Rik	NA	NA	NA	NA	NA	NA	0	0	0	0	0	0
4930555G01Rik	12.8101	0.921661	1.52095	0.605978	0.54453	NA	0.539728	1.19409	0.405838	0.691785	0.289632	0.640782
4930555G21Rik	NA	NA	NA	NA	NA	NA	0	0	0	0	0	0
4930555K05Rik	NA	NA	NA	NA	NA	NA	0	0	0	0	0	0
4930555K19Rik	2.0427	0.232462	4.31617	0.0538584	0.957048	NA	0.165646	0	0.405966	0.177035	0	0
4930556C24Rik	26.9927	-0.115086	1.04314	-0.110326	0.912151	0.980321	6.81922	2.7616	2.22985	7.4171	3.48897	4.05212
4930556G01Rik	NA	NA	NA	NA	NA	NA	0.489663	0	0	0	0	0
4930556J02Rik	4.53985	5.33919	2.96755	1.79919	0.0719886	NA	1.22576	3.56245	3.25922	0	0	0.22727
4930556L07Rik	8.32003	4.752	2.20966	2.15055	0.0315116	NA	1.35091	1.04892	0.811701	0.154286	0	0.046264
4930556M19Rik	71.7206	0.514902	0.654733	0.786432	0.431615	0.778525	8.38469	4.30268	4.36504	5.1601	2.46024	5.27368
4930556N09Rik	2.8096	1.39923	3.85633	0.362841	0.716723	NA	0	0.685859	1.36682	0.141974	0	0
4930556N13Rik	5.39515	-0.0140916	2.27113	-0.00620466	0.995049	NA	1.15065	0.1671	1.20637	0.979983	0.247498	0.456043
4930557F10Rik	1.776	1.55356	4.30201	0.361124	0.718007	NA	0.357726	0.486254	2.8336	0.417723	0	0
4930557J02Rik	NA	NA	NA	NA	NA	NA	0	0	0	0	0	0
4930557K07Rik	NA	NA	NA	NA	NA	NA	0	0	0	0	0	0
4930558C23Rik	9.95895	0.235496	1.77335	0.132797	0.894354	NA	0.468474	6.08144	3.96206	1.80129	1.66077	0.170944
4930558F17Rik	6.22521	2.06219	2.26349	0.911065	0.362261	NA	1.04744	2.29488	3.86808	0.725863	0.221662	0
4930558G05Rik	NA	NA	NA	NA	NA	NA	0	0	0.492506	1.01253	0.520682	0.350992
4930558J18Rik	199.87	0.351653	0.430123	0.817563	0.413607	0.768305	9.69451	12.0432	11.1152	10.7068	7.41739	9.22939
4930558K02Rik	18.1435	0.667091	1.27113	0.524803	0.59972	0.875142	3.3038	1.74153	2.65475	1.76032	1.53919	3.38696
4930559C10Rik	NA	NA	NA	NA	NA	NA	0	0	0.347651	0	0	0
4930562C15Rik	21.6594	2.26293	1.21208	1.86698	0.0619039	0.305825	0.561536	0.803288	1.19493	0.160131	0.135039	0.288763
4930562F07Rik	3.0795	1.00081	3.26882	0.306169	0.759476	NA	0.0938733	0.282226	2.9054	0.395291	0	0.245798
4930563E18Rik	6.50543	-0.704149	2.00045	-0.351995	0.724842	NA	0.520939	0.29136	0.461514	0.668187	0.623556	0.312918
4930563E22Rik	312.654	0.161157	0.332542	0.484621	0.627945	0.888993	12.5566	7.43883	8.20987	11.3043	7.29575	6.47244
4930563F08Rik	13.5814	0.384261	1.42009	0.270588	0.786708	NA	13.1526	13.7571	6.44644	9.80471	18.5668	4.7907
4930563H07Rik	NA	NA	NA	NA	NA	NA	0	0	0	0	0	0
4930563J15Rik	2.3374	1.54434	4.14163	0.372882	0.709236	NA	0	0.688207	0.583399	0.101177	0	0
4930563M20Rik	8.78489	1.72776	1.86164	0.928081	0.353366	NA	10.687	2.71833	6.3736	5.33994	0.635897	3.34183
4930563M21Rik	NA	NA	NA	NA	NA	NA	0	0.838559	0.687217	0	0.653778	0
4930564C03Rik	7.54359	2.05694	2.51149	0.819014	0.412778	NA	0	2.91392	1.75643	0	0.32079	0
4930564D02Rik	NA	NA	NA	NA	NA	NA	0.252202	0	0.267021	0	0	0
4930565D16Rik	NA	NA	NA	NA	NA	NA	0	0	0.118863	0	0	0
4930565N06Rik	8.75209	0.703948	1.75819	0.400383	0.688874	NA	0.505723	0.385668	0.611618	0.403524	0.191838	0.119768
4930567H12Rik	4.59409	3.251	2.68689	1.20995	0.226298	NA	2.0294	0.407872	1.48004	0.342306	0	0.111528
4930567H17Rik	4.26325	3.98167	3.78282	1.05256	0.292541	NA	0	4.83151	0	0	0	0
4930567J20Rik	NA	NA	NA	NA	NA	NA	0	0	0.291615	0	0	0
4930567K12Rik	NA	NA	NA	NA	NA	NA	0	0	0.096406	0	0	0
4930567K20Rik	NA	NA	NA	NA	NA	NA	1.70819	0	0	0	0	1.57824
4930568D16Rik	3.13705	4.25437	3.64776	1.16629	0.243495	NA	0.201062	0.534833	1.16901	0	0	0
4930568E12Rik	2.83615	-1.08642	2.91812	-0.3723	0.709669	NA	0.620996	0.271657	0.235774	0.457114	2.24874	0.162514
4930568G15Rik	NA	NA	NA	NA	NA	NA	0	0	0.148819	0	0.13792	0.100823
4930570G19Rik	15.1558	0.268731	1.43815	0.186859	0.851771	NA	2.57022	1.59927	2.32257	3.90026	0.297209	1.8812
4930571K23Rik	347.82	4.31602	0.437095	9.87434	5.37852e-23	3.79467e-20	29.7074	23.0913	40.139	2.73745	0.604696	0.875077
4930571O06Rik	NA	NA	NA	NA	NA	NA	0	0	0	0	0	0
4930572K03Rik	6.07182	3.35058	2.3588	1.42046	0.155474	NA	1.22104	1.80991	2.2551	0.167335	0.150111	0
4930572O03Rik	3.26776	-0.120715	3.60984	-0.0334405	0.973323	NA	0	0.429953	1.08046	0.54861	0	0
4930572O13Rik	1.26223	-0.296796	4.85397	-0.061145	0.951244	NA	0	0.272263	0.960986	0.457676	0	0
4930573H18Rik	1.01351	0.241125	4.82794	0.0499436	0.960167	NA	0.328509	0	0.3462	0.360404	0	0
4930573O16Rik	NA	NA	NA	NA	NA	NA	0	0	0	0	0	0
4930577N17Rik	51.2066	0.277529	0.774015	0.358558	0.719926	0.922956	3.3934	5.28023	4.52041	3.4044	4.08407	3.87954
4930578C19Rik	NA	NA	NA	NA	NA	NA	0	0	0	0	0	0
4930578E11Rik	25.4236	0.0698402	1.07332	0.0650696	0.948119	0.988437	1.75073	0.893955	1.63774	1.7467	0.9106	0.678
4930578G10Rik	9.68469	0.274006	1.70662	0.160555	0.872444	NA	3.37092	3.02223	4.11704	1.75733	5.06969	5.02642
4930578I06Rik	21.7575	1.77819	1.24156	1.43222	0.152081	0.491327	1.68836	5.10525	8.10523	1.14314	0.769386	0.282638
4930578L24Rik	120.961	-0.321498	0.521522	-0.61646	0.537591	0.842673	3.24515	3.06948	2.52856	5.21437	3.23981	3.03392
4930578M01Rik	NA	NA	NA	NA	NA	NA	0.330298	0	0.34891	0.275298	0	0.118182
4930578N18Rik	NA	NA	NA	NA	NA	NA	0	0	0	0	0	0
4930579D09Rik	1.02053	2.08213	4.92892	0.42243	0.672711	NA	2.38273	0	5.43072	0	0	0
4930579F01Rik	18.4279	2.55697	1.40557	1.81917	0.0688859	0.325555	0.843672	2.80386	3.0204	0.496325	0.13391	0.298768
4930579G18Rik	12.5512	0.789567	1.48757	0.530778	0.595573	NA	1.60054	0.989946	1.05754	1.03141	0.579765	0.644099
4930579G24Rik	894.058	-0.201312	0.219615	-0.916655	0.359323	0.728082	43.1988	47.253	49.7421	49.1098	60.7848	45.2646
4930579H20Rik	NA	NA	NA	NA	NA	NA	0	0	0	0.0818397	0	0
4930579J19Rik	NA	NA	NA	NA	NA	NA	0	0	0.570962	0	0	0
4930579K19Rik	188.758	0.365171	0.417947	0.873726	0.382267	0.744045	25.6935	21.9283	19.538	21.9444	17.7161	24.2706
4930579P08Rik	NA	NA	NA	NA	NA	NA	0.208397	0	0	0.342493	0	0
4930581F22Rik	13.4783	0.728134	1.43147	0.508661	0.61099	NA	0.887516	0.724359	0.442233	0.601991	0.434064	0.354285
4930583I09Rik	NA	NA	NA	NA	NA	NA	0	0	0	0	0	0
4930583K01Rik	6.53562	1.96789	2.0824	0.94501	0.344654	NA	1.55573	1.81672	1.10118	0.189404	1.02288	1.11615
4930583P06Rik	NA	NA	NA	NA	NA	NA	0	0	0	0	0	0
4930584F24Rik	26.6599	3.02856	1.12131	2.70091	0.00691501	0.0773229	5.21501	4.06147	5.59295	0.896873	0.389962	0.360323
4930586N03Rik	NA	NA	NA	NA	NA	NA	0	0	0	0.198513	0.379162	0
4930587E11Rik	NA	NA	NA	NA	NA	NA	0	0.242389	0	0	0.391826	0
4930589L23Rik	19.8935	0.440358	1.1952	0.368438	0.712547	0.920235	2.48286	2.18929	0.966409	1.90709	1.72959	1.74325
4930590A17Rik	NA	NA	NA	NA	NA	NA	0	0	0	0	0.130915	0
4930590J08Rik	30.058	3.72447	1.15383	3.22791	0.001247	0.0226549	1.40525	1.22632	2.22694	0.184281	0.0518909	0
4930590L20Rik	5.00719	-2.29798	2.73371	-0.840609	0.400567	NA	4.4704	0	0	4.96813	4.72202	4.39388
4930591A17Rik	17.7459	0.790376	1.27594	0.619445	0.535623	0.842371	8.87945	3.28894	3.76095	4.74129	2.59471	4.27681
4930591E09Rik	NA	NA	NA	NA	NA	NA	0	0	0	0	0	0
4930592A05Rik	1.27111	1.58088	4.97377	0.317843	0.750604	NA	0	0.180482	0.415471	0	0	0.382578
4930592C13Rik	17.8762	0.359698	1.2647	0.284415	0.776092	0.937714	5.52638	6.70993	6.92585	5.0159	5.86173	5.8107
4930592I03Rik	11.5017	3.64477	1.87502	1.94386	0.0519126	NA	1.69367	3.54944	3.5563	0.774682	0	0.200533
4930593A02Rik	2.55177	1.53589	3.04541	0.504329	0.61403	NA	0.646	0.633642	0.339691	0.35358	0.160873	0.346232
4930593C16Rik	NA	NA	NA	NA	NA	NA	0	0.590632	0	0.511826	0	0
4930594C11Rik	26.7762	1.12049	1.08112	1.03641	0.300011	0.672932	0.99024	1.40149	1.73798	0.811552	0.397084	0.363278
4930594M22Rik	90.2338	0.443139	0.590047	0.751023	0.452639	0.792707	2.72987	2.19105	2.85229	1.92705	1.81098	1.94646
4930594O21Rik	2.11592	2.27109	3.67248	0.618407	0.536307	NA	0.301044	0.490638	0.655349	0	0.315373	0.445997
4930595D18Rik	NA	NA	NA	NA	NA	NA	0	0.266141	0	0.223222	0.406187	0
4930595M18Rik	2.88162	0.257398	3.56446	0.0722123	0.942433	NA	0	0.0988531	0.348334	0.0808804	0	0.102349
4930596D02Rik	9.00415	4.72243	2.16951	2.17673	0.029501	NA	0.936894	3.1666	1.3122	0	0.199726	0
4930596I21Rik	1.78592	0.551353	4.2229	0.130563	0.896121	NA	4.0396	0	6.17988	3.06249	0	2.44535
4930597A21Rik	NA	NA	NA	NA	NA	NA	0	0	0	0	0.592226	0
4930597G03Rik	NA	NA	NA	NA	NA	NA	0.1089	0	0	0.237857	0	0
4930598F16Rik	NA	NA	NA	NA	NA	NA	0	0	0.249019	0	0	0
4930599N23Rik	41.5536	0.337595	0.855298	0.394711	0.693056	0.913349	7.32413	9.95927	8.55043	7.53139	6.73476	6.45924
4931402G19Rik	2.95151	-3.13915	3.42089	-0.91764	0.358807	NA	0	0.0816266	0	0.127973	0.284775	0.286437
4931403E22Rik	NA	NA	NA	NA	NA	NA	0	0	0.337076	0	0	0
4931403G20Rik	23.3459	1.62581	1.15698	1.40522	0.159957	0.502527	1.84603	2.29112	2.87594	1.01638	0.447916	0.251606
4931406B18Rik	19.4558	0.576435	1.21488	0.474479	0.635159	0.891991	0.486633	0.595095	0.518458	0.396485	0.348251	0.303218
4931406C07Rik	258.143	-0.0587715	0.370543	-0.158609	0.873977	0.968621	7.69163	10.136	9.01495	9.90133	9.47173	9.30705
4931406H21Rik	25.8876	-0.598752	1.11681	-0.536126	0.591872	0.871973	0.993573	0.187229	0.468691	0.814202	0.633507	0.608183
4931406P16Rik	4143.01	-0.163726	0.146339	-1.11881	0.26322	0.633154	57.0939	65.7526	71.0061	63.6237	80.7694	47.3516
4931408C20Rik	0.673145	2.50132	4.9215	0.508244	0.611282	NA	0	0.0830426	0	0	0	0
4931408D14Rik	8.55909	-0.518485	1.80294	-0.287578	0.77367	NA	0.214749	0.121089	0.607811	0.233925	0.254468	0.149112
4931409K22Rik	32.667	-0.108477	1.03162	-0.105153	0.916255	0.980898	0.861524	1.47608	1.21539	2.15934	0.556006	0.570792
4931414P19Rik	158.364	0.51444	0.467476	1.10046	0.27113	0.64185	5.07173	8.66617	8.47691	4.72567	5.12586	5.36706
4931417E11Rik	12.2608	1.14938	1.59253	0.721729	0.470461	NA	0.798809	2.88041	3.28957	0.489454	1.11896	0
4931419H13Rik	2.89857	3.88756	3.44472	1.12856	0.259084	NA	1.08151	0.806447	0.654765	0.170538	0	0
4931420L22Rik	NA	NA	NA	NA	NA	NA	0.227384	0	0.240247	0.998953	0.229532	0.165692
4931422A03Rik	6.06213	0.992835	2.0987	0.473072	0.636162	NA	1.11734	0.895668	1.00645	0.299394	0.935615	0.792224
4931423N10Rik	12.6832	1.21396	1.49838	0.810181	0.417836	NA	1.0269	0.75457	1.48739	0.499273	0.319002	0.279147
4931428F04Rik	952.919	0.187834	0.21363	0.879247	0.379267	0.74173	25.4685	27.1103	29.599	23.2269	25.5174	23.046
4931428L18Rik	25.0231	0.257934	1.08465	0.237804	0.812033	0.949269	3.22851	2.85279	2.89463	3.50352	2.09202	2.83595
4931429L15Rik	19.4399	2.47625	1.35585	1.82634	0.0677986	0.322577	1.22706	1.96754	1.93705	0.746031	0.106228	0.0722583
4931429P17Rik	NA	NA	NA	NA	NA	NA	0	0	0.106844	0	0	0
4931430N09Rik	6.65182	-0.519417	2.0045	-0.259126	0.795538	NA	0.133558	0.415684	0.510058	0.387225	0.327914	0.0307833
4931431B13Rik	NA	NA	NA	NA	NA	NA	4.52653	1.38711	0.462864	0	0	0
4931431C16Rik	31.1748	-0.301825	0.966852	-0.312173	0.754909	0.934058	1.20124	1.18827	0.813692	1.61481	1.46484	0.552567
4931440F15Rik	30.4298	2.75886	1.15449	2.38967	0.0168634	0.14005	0.672538	2.01113	2.42027	0.349221	0.0784038	0.0349975
4931440J10Rik	2.758	1.0527	2.8903	0.364217	0.715696	NA	1.06198	0.694132	0.187301	0.583748	0.352578	0.126666
4931440P22Rik	83.9966	-0.081015	0.609499	-0.132921	0.894256	0.974691	5.73171	5.96273	6.66217	6.98491	6.16605	4.51722
4932411N23Rik	6.34672	2.39505	2.17126	1.10307	0.269997	NA	0.206377	0.172252	0.511598	0.056358	0.0237895	0.0178062
4932412D23Rik	50.3918	-1.33631	0.789252	-1.69313	0.0904306	0.378811	0.629692	3.49081	2.58181	2.14433	1.99267	1.47849
4932413F04Rik	4.84579	-0.0250763	2.4227	-0.0103506	0.991742	NA	0.212363	0.0471239	0.258742	0.308958	0.0327423	0.171861
4932414J04Rik	2.83383	-2.56017	3.4649	-0.738888	0.459975	NA	0	0.130743	0.0895173	0.221348	0.0964755	0
4932414N04Rik	6.9694	1.13369	2.01641	0.56223	0.57396	NA	0.129628	0.24114	0.514188	0.141334	0.0476352	0.0179205
4932415M13Rik	9.47308	0.0107248	1.8044	0.0059437	0.995258	NA	0.0609708	0.44423	0.797774	0.22029	0.128254	0.0634439
4932429P05Rik	NA	NA	NA	NA	NA	NA	0	0.29161	0	0	0	0
4932435O22Rik	40.6866	1.02617	0.861506	1.19114	0.233599	0.602123	2.37136	1.37171	0.659078	0.952807	0.908809	0.472449
4932438A13Rik	7584.6	-0.00476676	0.150305	-0.0317139	0.9747	0.993612	56.35	35.2687	37.4036	50.4692	42.6783	21.31
4932438H23Rik	7.70293	0.789553	2.06066	0.383155	0.701605	NA	0.108035	0.482418	0.799404	0.275501	0.0667508	0
4932441J04Rik	NA	NA	NA	NA	NA	NA	0	0.337756	0	0	0	0
4932702P03Rik	3.4411	2.91056	3.006	0.968248	0.332921	NA	0.987692	2.49296	0.570878	0.80761	0	0.803328
4933400A11Rik	7.99266	5.11196	2.45121	2.08548	0.0370255	NA	0.962154	2.16637	1.61339	0.10927	0	0
4933400B14Rik	NA	NA	NA	NA	NA	NA	0	0	0	0	0	0
4933400C23Rik	NA	NA	NA	NA	NA	NA	0	0	0	0.207223	0	0
4933400F21Rik	13.0529	1.49477	1.49081	1.00266	0.316026	NA	0.354961	0.638093	0.529647	0.221438	0.140334	0.105433
4933400L20Rik	1.44705	0.826938	4.69146	0.176265	0.860086	NA	0	0.467167	0.751757	0.194989	0	0.126492
4933401B06Rik	2.57469	0.0456102	3.97476	0.0114749	0.990845	NA	0.00762513	0.39991	0.742268	0.432473	0	0
4933401D09Rik	6.61869	-0.319365	1.99152	-0.160362	0.872596	NA	0.709897	0.3525	0.280395	0.874251	0.513902	0.810094
4933401H06Rik	9.14414	2.27796	1.76112	1.29347	0.195848	NA	2.02132	3.06953	2.29048	0.509868	0.597695	0.109749
4933402C06Rik	2.22752	1.7297	3.58879	0.481972	0.629826	NA	0.44193	0.193562	0.932898	0.322151	0	0.104584
4933402D24Rik	2.05412	3.60051	4.36174	0.825475	0.409102	NA	0.0608246	0.241269	0.445024	0	0	0
4933402E13Rik	66.2751	0.525186	0.734877	0.714658	0.47482	0.807701	1.87469	5.23173	8.1881	2.46123	2.15926	0.763459
4933402J07Rik	52.0999	2.25888	0.788165	2.866	0.0041569	0.0535554	12.5943	8.4191	14.7415	3.02746	1.78913	1.03048
4933402J10Rik	10.8441	4.94671	2.14166	2.30975	0.0209019	NA	0.899821	3.1795	3.94729	0.164494	0	0.298096
4933402J15Rik	NA	NA	NA	NA	NA	NA	0	0	0.210096	0	0	0
4933402N03Rik	8.43973	5.78045	2.50843	2.30441	0.0211998	NA	1.49931	0.70378	3.26141	0	0	0
4933402N22Rik	5.25449	3.61529	3.24265	1.11492	0.264886	NA	0	1.60002	1.87108	0	0	0
4933403O08Rik	48.267	-0.402379	0.800556	-0.502625	0.615228	0.883131	3.09832	2.94083	4.64031	5.40617	3.2557	2.31854
4933404G15Rik	8.23956	2.21686	2.44965	0.90497	0.365481	NA	0	1.41374	1.74168	0	0.124027	0
4933404K08Rik	5.00885	0.130681	2.22079	0.0588441	0.953076	NA	0.482165	0.532292	0.167541	0.525337	0.45763	0.281741
4933404K13Rik	13.0441	0.550627	1.47805	0.372535	0.709494	NA	2.43686	3.18056	2.38485	2.8729	1.57127	2.45885
4933404O12Rik	158.238	-0.368025	0.452444	-0.813416	0.41598	0.769144	3.71465	3.20787	2.36087	5.32053	4.0895	3.75535
4933405D12Rik	16.7409	0.317373	1.3127	0.241771	0.808958	NA	5.66855	2.35097	4.17973	4.26902	2.48977	4.34534
4933405E24Rik	NA	NA	NA	NA	NA	NA	0	0.162234	0.129457	0	0	0
4933405L10Rik	37.633	0.503277	0.892765	0.563728	0.572939	0.862803	4.51136	4.65791	6.17471	3.72491	3.18305	2.23699
4933405O20Rik	9.47981	1.55759	2.28756	0.680892	0.49594	NA	0	1.58907	2.98703	0	0.313952	0
4933406C10Rik	11.6555	-0.26087	1.53962	-0.169438	0.865452	NA	0.61048	1.0752	0.568887	1.19072	0.894157	0.476761
4933406D12Rik	NA	NA	NA	NA	NA	NA	0	0	0.267021	0	0.257746	0
4933406F09Rik	36.7627	2.62589	0.95431	2.75161	0.00593031	0.0697329	4.12886	6.42572	7.60087	1.00436	0.779593	0.384425
4933406G16Rik	NA	NA	NA	NA	NA	NA	0	0.106802	0.0849891	0	0	0
4933406I18Rik	4.69763	1.86009	2.49502	0.745521	0.455957	NA	0.531149	1.84054	1.54607	0.346855	0.331546	0
4933406J09Rik	2.28512	-1.03088	3.17433	-0.324756	0.745366	NA	0.155599	0.102312	0.162744	0.339724	0.21937	0.109152
4933406J10Rik	2.58934	2.14596	3.62387	0.592175	0.553733	NA	0.14846	1.36156	0.156131	0.650608	0	0
4933406K04Rik	5.6059	-3.05226	2.51516	-1.21354	0.224922	NA	0.174046	0	1.54486	0.569052	0.57322	0.12213
4933406M09Rik	38.4306	1.16766	0.883118	1.3222	0.186102	0.54415	4.12981	3.05232	2.87017	1.97943	1.39999	1.0925
4933407E24Rik	NA	NA	NA	NA	NA	NA	0	0	0.119606	0	0	0.120895
4933407G14Rik	2.30998	0.755935	3.16782	0.238629	0.811393	NA	0.183682	0.366976	0.0973387	0.100956	0.265575	0.259592
4933407I05Rik	2.7116	3.52771	3.6087	0.977557	0.328294	NA	0.42963	1.67541	1.13364	0.235828	0	0
4933407K13Rik	62.5957	0.0453065	0.696104	0.0650858	0.948106	0.988437	2.51454	1.77616	1.19575	2.77547	1.65449	0.75376
4933407L21Rik	3.6235	-3.30492	3.04798	-1.0843	0.278233	NA	0	0.142268	0.229363	1.19111	0.208917	0.617641
4933408B17Rik	3.20885	-1.79752	3.02471	-0.594278	0.552326	NA	0.230616	0	0.0483302	0.416554	0.0862318	0.0965187
4933408J17Rik	44.3199	0.150619	0.835575	0.180258	0.85695	0.963614	2.58096	2.91728	2.62532	3.27022	2.06424	2.46455
4933408N05Rik	20.5114	-0.511587	1.18601	-0.431353	0.666212	0.902126	1.38734	0.816008	1.09308	2.19043	1.22644	0.98969
4933409F18Rik	2.26162	2.06244	3.45494	0.596954	0.550538	NA	0.599107	0.264555	0.313779	0.108863	0.0948755	0
4933409G03Rik	18.0823	2.62146	1.40947	1.85989	0.0629017	0.307879	1.18433	3.23762	4.09069	0.463203	0.241205	0
4933409K07Rik	68.6601	0.0750654	0.669761	0.112078	0.910762	0.979803	1.75524	1.16707	1.83432	1.84405	1.0989	0.729839
4933411E08Rik	17.0711	2.34816	1.39673	1.68118	0.0927271	0.38272	1.96421	1.46334	2.12264	0.860389	0.122128	0.227844
4933411G06Rik	3.67134	-0.697462	2.92739	-0.238254	0.811684	NA	0.810586	0	1.27731	0.739508	0.130755	0.0956969
4933411K16Rik	636.591	4.08981	0.308401	13.2613	3.87903e-40	1.91572e-36	123.708	63.5525	127.66	10.2068	2.84771	1.76103
4933412E12Rik	407.332	0.665749	0.299764	2.22091	0.0263568	0.181629	52.9051	27.8711	29.009	32.4898	20.1748	19.7668
4933412E24Rik	26.5409	-1.35811	1.06188	-1.27897	0.200908	0.565582	1.22479	0.73572	1.36796	3.40999	1.98322	1.35924
4933412O06Rik	2.40619	2.74516	3.44604	0.796612	0.425676	NA	0.581683	0.459172	0.243997	0	0.334612	0.0833226
4933413J09Rik	4.7958	0.951718	2.40317	0.396026	0.692086	NA	0.0816712	0.287461	0.141404	0.23846	0.0249091	0.018833
4933413L06Rik	1.65678	-0.974368	4.02605	-0.242016	0.808768	NA	0	0.410694	0.328046	0.169679	0.303036	0.332125
4933415F23Rik	205.64	2.73807	0.421195	6.50072	7.99376e-11	1.30149e-08	19.9401	17.3304	31.9528	3.13189	2.82234	1.68351
4933416C03Rik	455.146	-0.13029	0.285545	-0.456286	0.648184	0.894764	15.8571	22.5229	20.3861	16.9662	27.7706	23.1661
4933416E03Rik	NA	NA	NA	NA	NA	NA	0	0	0.359272	0	0	0
4933416I08Rik	3.97589	-1.6829	2.91373	-0.577575	0.563551	NA	0	0.24809	1.28046	0.512545	0.0894878	0.132378
4933416M06Rik	1.18341	3.60224	4.84348	0.743729	0.45704	NA	0.0891628	0.351661	0.187765	0	0	0
4933416M07Rik	117.063	-0.133764	0.524711	-0.254929	0.798778	0.944264	9.81878	7.45403	6.64021	9.57689	10.4608	9.50641
4933416O17Rik	8.72048	1.75699	1.84342	0.953111	0.340534	NA	0.335594	0.762252	0.998702	0.261723	0.0888417	0.0666939
4933417A18Rik	14.4276	1.14586	1.52461	0.751575	0.452307	NA	0.94377	4.19784	3.95671	1.7153	0.557568	0.306234
4933417D19Rik	18.6601	2.17533	1.33678	1.62728	0.103677	0.404696	2.49718	3.54583	2.61659	1.48714	0.296951	1.17606
4933417E11Rik	2.32196	-0.0486086	4.12281	-0.0117902	0.990593	NA	0.457489	0	0	0	0.663238	0.488169
4933417G07Rik	NA	NA	NA	NA	NA	NA	0.305225	0.199678	0.161768	0	0	0
4933417O13Rik	1.69806	2.0475	4.02414	0.508805	0.610889	NA	0.144371	0.0949686	0.377181	0	0.0680268	0.0504987
4933421I07Rik	2.07218	-2.39754	4.79898	-0.499593	0.617362	NA	0	0	0.625075	0.50994	0	0
4933421O10Rik	66.2133	0.110042	0.683985	0.160884	0.872185	0.968453	2.23079	1.35982	1.73378	2.43773	1.16908	0.972008
4933422A05Rik	NA	NA	NA	NA	NA	NA	0.26119	0.344922	0	0.285688	0	0
4933424G05Rik	4.51771	0.300682	2.34019	0.128486	0.897764	NA	0.424893	0.24003	0.126686	0.33079	0.227215	0.296929
4933424G06Rik	9.21612	1.7704	1.79276	0.987525	0.323385	NA	0.72144	2.52644	2.27439	0.525397	0.347482	0.256377
4933424L21Rik	3.40569	1.00825	2.80184	0.359854	0.718956	NA	0.103364	0.679086	0.869751	0.113727	0.197917	0.146436
4933425B07Rik	NA	NA	NA	NA	NA	NA	0	0.142718	0.0564354	0	0	0.0376676
4933425L06Rik	349.43	-0.554842	0.324794	-1.70829	0.0875831	0.37246	14.7639	12.0357	12.1382	19.4169	21.7198	19.7919
4933427D06Rik	1655.92	-0.212697	0.181549	-1.17156	0.241372	0.610684	45.1522	62.4811	65.2748	57.7265	72.5956	52.46
4933427D14Rik	502.634	-0.0991535	0.271744	-0.364878	0.715203	0.921323	10.452	9.64618	8.7579	11.3429	11.3016	6.6439
4933427E11Rik	13.0753	0.797091	1.52741	0.521859	0.601769	NA	0.534704	1.9608	3.14674	0.588208	0.720774	1.37466
4933427E13Rik	NA	NA	NA	NA	NA	NA	0.232461	0	0	0	0.147623	0
4933427I22Rik	NA	NA	NA	NA	NA	NA	0	0	0	0	0	0
4933428C19Rik	NA	NA	NA	NA	NA	NA	0	0	0.199662	0	0	0
4933428G20Rik	14.8958	0.417034	1.37052	0.304289	0.760908	NA	1.81621	1.17505	1.21985	1.24175	1.10871	0.914753
4933428M09Rik	29.8876	-0.648942	1.00374	-0.646524	0.51794	0.83257	1.97028	4.43416	2.66617	3.84859	6.58123	5.91163
4933429K18Rik	NA	NA	NA	NA	NA	NA	0	0	0.27592	0	0	0
4933429O19Rik	2.61589	4.65917	3.64053	1.2798	0.200614	NA	0.349925	0.278121	0.365894	0	0	0.0972901
4933430H16Rik	25.7023	0.310223	1.05845	0.293092	0.769452	0.936836	3.05848	2.33452	1.61048	2.56348	2.07397	1.02411
4933430I17Rik	97.0742	-0.126318	0.567588	-0.222553	0.823883	0.952232	6.25203	5.48328	6.05477	6.40628	7.05003	3.77525
4933430M04Rik	NA	NA	NA	NA	NA	NA	0.743448	0	0	0	0.252709	0
4933430N04Rik	2.81377	4.51586	3.80243	1.18762	0.234981	NA	0.669326	0.293086	0.933412	0	0	0
4933431E20Rik	587.202	0.335023	0.255353	1.312	0.189521	0.549713	13.3617	9.98489	8.0102	10.7154	8.52888	7.14404
4933431G14Rik	12.3283	-0.379861	1.56841	-0.242194	0.80863	NA	0.409284	0.976709	1.65114	1.17485	0.618293	0.264653
4933432G23Rik	NA	NA	NA	NA	NA	NA	0	0	0	0.421359	0	0
4933432I03Rik	1.64387	-0.578278	4.30935	-0.134191	0.893251	NA	0.6127	0	0.129269	0.40397	0.118086	0
4933432I09Rik	3.54127	2.31947	3.15275	0.7357	0.461913	NA	0.588948	0.190623	0.534659	0	0.344661	0
4933432K03Rik	14.3344	1.07777	1.41626	0.760998	0.446658	NA	7.73335	6.05326	15.2369	3.80214	3.85499	1.6386
4933433F19Rik	NA	NA	NA	NA	NA	NA	0	0	0	0	0.116989	0.0861791
4933433G08Rik	2.71614	-0.00129379	3.8658	-0.000334674	0.999733	NA	0.286836	0	0.300484	0	0.377582	0
4933433G15Rik	44.5986	0.59546	0.827064	0.719968	0.471545	0.804984	6.32496	4.70782	6.87195	3.73567	4.04517	3.70983
4933433G19Rik	2.15008	-0.505721	3.45454	-0.146393	0.883611	NA	0.53831	0.174022	0.137918	0.436117	0.513068	0
4933433H22Rik	1.21332	-1.47438	4.84005	-0.304621	0.760655	NA	0	0.0778916	0.185968	0.0648305	0.110793	0
4933434E20Rik	1981.43	-0.068203	0.170916	-0.399043	0.689862	0.912683	101.22	95.1567	100.634	114.406	101.843	114.783
4933436E23Rik	NA	NA	NA	NA	NA	NA	0	0	0	0	0	0
4933436H12Rik	NA	NA	NA	NA	NA	NA	0	0	0	0	0	0
4933436I01Rik	4.60915	-0.668048	2.41607	-0.276502	0.782163	NA	0.314875	0.104268	0.909472	0.432364	0.225121	0.221647
4933438B17Rik	7.18838	-1.17609	1.99726	-0.588852	0.55596	NA	1.06598	0.13905	0.778732	1.85683	0.50647	0.373781
4933438K21Rik	60.1636	0.985466	0.747623	1.31813	0.187459	0.546471	6.74882	4.10937	3.90915	5.47008	1.39986	1.26027
4933439C10Rik	221.405	0.759243	0.387567	1.95899	0.0501134	0.269722	14.9989	15.4622	12.792	9.13165	9.52871	8.24399
4933439K11Rik	2.61304	-0.921112	3.03233	-0.303764	0.761307	NA	0.30439	0.199839	0.479426	0.833368	0.296243	0.32294
4933440J02Rik	3.62595	-1.34832	2.90506	-0.464129	0.642555	NA	0.725835	0	0.545799	0.797021	0.198889	0.0736102
4933440M02Rik	13.4546	-0.965492	1.48346	-0.650839	0.51515	NA	0.738093	0.24393	1.56134	1.48891	0.519153	0.514719
5031410I06Rik	72.7548	1.68822	0.660915	2.55436	0.0106382	0.102149	4.65424	2.9169	3.41184	1.32526	1.08424	0.958486
5031425E22Rik	230.274	-0.285224	0.382742	-0.745213	0.456143	0.795131	8.59622	8.79744	8.8976	10.0049	12.4675	9.62899
5031425F14Rik	NA	NA	NA	NA	NA	NA	0	0	0	0	0	0
5031426D15Rik	183.194	0.337561	0.426155	0.79211	0.428297	0.776222	3.01555	3.05638	2.98048	2.78161	2.23889	2.44342
5031434C07Rik	11.73	-0.494861	1.54592	-0.320109	0.748886	NA	0.852617	0.252201	0.346387	1.18903	0.398922	0.366743
5031434O11Rik	14.6885	-0.0509488	1.37739	-0.0369894	0.970493	NA	7.1913	2.75989	2.54095	7.03037	3.83796	1.17461
5031439G07Rik	937.575	0.517904	0.244298	2.11996	0.034009	0.211802	15.7182	22.0895	25.8281	14.682	12.7112	11.0804
5033403F01Rik	20.9923	-0.0883981	1.22879	-0.0719394	0.94265	0.98714	1.28984	2.15444	2.70175	3.28209	1.057	0.543112
5033403H07Rik	NA	NA	NA	NA	NA	NA	1.05125	1.29388	1.18837	2.3755	0	0
5033404E19Rik	NA	NA	NA	NA	NA	NA	0	0	0	0	0	0
5033406O09Rik	23.8662	-0.473835	1.11236	-0.425971	0.670129	0.904659	1.10516	1.37125	1.15957	2.07041	1.59883	2.00598
5033417F24Rik	2.75448	2.72174	3.27505	0.831052	0.405944	NA	0.287372	0.235336	0.249421	0	0.15789	0.0417981
5033428I22Rik	NA	NA	NA	NA	NA	NA	0.15489	0	0.163253	0	0	0
5330411J11Rik	4.33402	-0.893286	2.47159	-0.361422	0.717784	NA	0.0680087	0.446701	0.354814	0.520049	0.25391	0.142302
5330413P13Rik	NA	NA	NA	NA	NA	NA	0	0	0.0264498	0	0	0
5330416C01Rik	NA	NA	NA	NA	NA	NA	0.05692	0	0	0.0311246	0.484885	0
5330417C22Rik	409.793	-0.00130729	0.301716	-0.00433284	0.996543	0.998989	4.81467	7.45926	8.69382	5.60651	6.94491	4.09103
5330434G04Rik	10.8313	-0.0753724	1.58935	-0.0474233	0.962176	NA	0.346852	0.24927	0.389843	0.466692	0.221118	0.0921158
5330439B14Rik	NA	NA	NA	NA	NA	NA	0	0	0	0	0	0
5430401F13Rik	NA	NA	NA	NA	NA	NA	0	0	0	0.695167	0	0.159455
5430402E10Rik	NA	NA	NA	NA	NA	NA	0.607478	0.00191275	0	0	0	0
5430402O13Rik	59.2757	0.140889	0.719716	0.195757	0.844801	0.960341	9.9013	8.12692	10.0195	8.4226	8.83948	11.3093
5430403N17Rik	NA	NA	NA	NA	NA	NA	0.0388389	0	0	0	0	0
5430405H02Rik	674.4	0.555403	0.245041	2.26657	0.0234162	0.169075	74.508	74.5564	71.3692	59.8293	50.8378	56.6299
5430416N02Rik	82.2646	0.191077	0.613583	0.311411	0.755488	0.934446	41.2483	28.4438	24.0682	40.5731	29.8076	28.5289
5430419D17Rik	NA	NA	NA	NA	NA	NA	0	0.12928	0	0.179003	0	0
5430421F17Rik	104.4	0.674343	0.566605	1.19015	0.233989	0.602353	4.36269	5.80852	5.95174	3.77125	2.87498	4.14956
5430425K12Rik	NA	NA	NA	NA	NA	NA	0	0	0	0	0	0
5430427M07Rik	2.51061	-1.24473	3.40403	-0.365663	0.714616	NA	0.651383	0	0.409226	0.284339	0.380956	0.276087
5430427O19Rik	NA	NA	NA	NA	NA	NA	0.024242	0.0323541	0	0.0264649	0.0444706	0
5430428K19Rik	NA	NA	NA	NA	NA	NA	0.156913	0.412516	0	0.343218	0.305531	0.111964
5430431A17Rik	4.70894	1.21602	2.34046	0.519565	0.603367	NA	2.15356	0.839782	0.909241	0.472854	0.864419	0.939064
5430434I15Rik	NA	NA	NA	NA	NA	NA	0	0	0	0	0	0
5430437J10Rik	2.60936	2.39328	3.57039	0.670315	0.502657	NA	0.378219	0.38612	0.447129	0	0.384922	0
5430440P10Rik	3.74912	-0.111554	2.56918	-0.04342	0.965367	NA	0.630648	0.420044	0.176493	1.09854	0.255726	0.478848
5530400C23Rik	NA	NA	NA	NA	NA	NA	0	0	0	0	0	0
5530401A14Rik	NA	NA	NA	NA	NA	NA	0	0	0	0	0	0
5530601H04Rik	363.674	0.133044	0.315323	0.42193	0.673076	0.905239	11.5471	8.08434	8.52282	9.80594	8.54671	7.22391
5730403I07Rik	24.911	-0.042874	1.07982	-0.0397047	0.968329	0.991614	1.3969	1.1156	1.08455	1.40811	1.31015	1.13658
5730405O15Rik	6.22674	-1.09261	2.06357	-0.529476	0.596475	NA	1.05509	0.463201	1.11577	2.50917	1.03405	0.631296
5730408K05Rik	NA	NA	NA	NA	NA	NA	3.028	10.9104	0	6.91078	0	0
5730409E04Rik	16.2882	0.823757	1.39336	0.591203	0.554384	NA	0.699107	0.219837	1.13334	0.552033	0.0940383	0.538269
5730412P04Rik	NA	NA	NA	NA	NA	NA	0	0	0	0	0	0
5730416F02Rik	NA	NA	NA	NA	NA	NA	0	0.285011	0	0	0.209145	0
5730420D15Rik	1.22057	3.74618	4.84293	0.773537	0.439205	NA	0.453428	0.148935	0.238025	0	0	0
5730422E09Rik	8.68654	-0.866653	1.81415	-0.477718	0.632851	NA	0.193373	0.595234	0.543166	0.917887	0.489012	0.637495
5730435O14Rik	NA	NA	NA	NA	NA	NA	0	0	0	0	0	0
5730455P16Rik	887.696	-0.192023	0.223217	-0.860253	0.389649	0.750331	16.9212	16.4135	17.6062	21.9199	17.9269	16.7226
5730460C07Rik	1.49069	-0.234117	3.77486	-0.06202	0.950547	NA	0.115448	0.0805591	0.0646128	0.129561	0.111693	0.0431403
5730480H06Rik	28.2311	-0.495466	1.01843	-0.486502	0.626611	0.888239	1.34155	1.80133	2.19344	2.21562	2.42749	0.643045
5730488B01Rik	2.06543	-2.20525	3.63373	-0.606884	0.543928	NA	0.154367	0	0.053704	0.225044	0.192281	0.0362927
5730507C01Rik	1456.86	-0.545415	0.195811	-2.78542	0.0053458	0.0646677	50.9709	47.6755	52.3692	67.7223	82.865	50.2778
5730522E02Rik	7.98007	0.457792	1.8605	0.246059	0.805637	NA	0.747418	0.494565	0.704924	0.982143	0.211703	0.473028
5830408C22Rik	NA	NA	NA	NA	NA	NA	0	0	0	0	0	0
5830411N06Rik	NA	NA	NA	NA	NA	NA	0	0	0	0	0.0306263	0
5830416I19Rik	39.0711	0.867311	0.906146	0.957143	0.338495	0.709405	2.18413	1.8076	0.987814	2.01134	0.637999	1.34124
5830417I10Rik	2320.72	-0.17413	0.170552	-1.02098	0.307265	0.679367	21.3663	18.956	22.1879	22.5949	24.8849	13.9659
5830418P13Rik	NA	NA	NA	NA	NA	NA	0.13682	0.0600981	0.0475455	0.0646457	0	0
5830428M24Rik	NA	NA	NA	NA	NA	NA	0	0	0	0.141479	0	0
5830432E09Rik	NA	NA	NA	NA	NA	NA	0	0	0	0	0	0
5830444B04Rik	59.0936	0.477786	0.748551	0.638282	0.52329	0.83466	5.11782	2.7435	2.75593	2.13418	2.15264	1.70945
5830454E08Rik	65.9566	0.93356	0.715897	1.30404	0.192219	0.552566	17.0993	22.4979	20.1956	14.7082	8.8448	15.6003
5830473C10Rik	11.7939	0.389835	1.52451	0.255712	0.798173	NA	0.838704	0.553986	0.24413	0.763726	0.391483	0.523645
5930403L14Rik	113.737	-1.24019	0.567871	-2.18393	0.0289676	0.193066	0.919921	1.2408	1.7833	3.53271	1.97973	1.67648
5930412G12Rik	65.4276	-0.115609	0.70845	-0.163185	0.870373	0.968201	2.31941	2.89373	1.69098	3.89628	2.23208	3.19144
5930430L01Rik	232.257	0.606959	0.385524	1.57437	0.115401	0.427656	7.05974	7.03878	5.94483	5.52812	4.19588	4.88525
5930438M14Rik	2.2094	-2.22543	4.13847	-0.537743	0.590754	NA	0.201989	0	0	0.132268	0.225485	0
6030407O03Rik	2.69104	1.70577	2.97872	0.572652	0.56688	NA	0.303432	0.239389	0.127097	0.066238	0.114354	0.127832
6030408B16Rik	251.787	0.145799	0.387937	0.375831	0.707043	0.919622	12.7221	13.8786	13.647	15.8047	10.1512	11.5136
6030440G07Rik	63.9971	0.691598	0.710056	0.974005	0.330054	0.700914	9.75573	10.0161	8.71501	8.89757	4.85223	6.51455
6030443J06Rik	72.0505	-0.284351	0.653185	-0.435329	0.663324	0.900724	1.7031	1.35313	1.13097	2.34507	1.59215	1.15881
6030458C11Rik	1124.64	-0.266701	0.212412	-1.25558	0.209267	0.573551	32.0824	26.4435	23.7892	34.9825	38.1224	28.6057
6030466F02Rik	NA	NA	NA	NA	NA	NA	0	0	0	0	0	0
6030468B19Rik	NA	NA	NA	NA	NA	NA	0.128842	0.166973	0.134894	0	0	0
6030469F06Rik	NA	NA	NA	NA	NA	NA	0	0	0	0.0772741	0	0
6030471H07Rik	NA	NA	NA	NA	NA	NA	0	0	0	0	0	0
6030498E09Rik	NA	NA	NA	NA	NA	NA	0	0	0	0	0	0
6230400D17Rik	35.7998	0.701114	0.923202	0.759437	0.447591	0.789747	9.68274	4.04819	3.25744	4.37789	3.98356	2.85348
6330403K07Rik	48.8238	-0.259982	0.78404	-0.331593	0.740197	0.929035	3.80042	3.19035	2.32862	4.94889	3.98628	2.97443
6330407A03Rik	NA	NA	NA	NA	NA	NA	0	0	0	0.0610089	0	0
6330409D20Rik	12.9429	0.800676	1.46636	0.546028	0.585046	NA	2.18751	1.64525	1.08441	1.37186	1.00508	1.64172
6330410L21Rik	4.5543	0.772179	2.38378	0.32393	0.745991	NA	0.194383	0.0645773	0.151658	0.10595	0.044605	0.100659
6330415B21Rik	2.75584	-0.655045	3.12797	-0.209416	0.834124	NA	0.195469	0.0655132	0	0.329082	0.0933912	0.102232
6330415G19Rik	114.659	0.370044	0.524603	0.705378	0.480575	0.81179	13.7039	7.48048	7.54895	11.1581	6.24716	7.15808
6330418K02Rik	27.9368	0.622701	1.02773	0.6059	0.544581	0.845794	8.96599	7.17017	8.91727	6.59057	5.03561	5.90236
6330549D23Rik	84.7185	0.327565	0.612095	0.535153	0.592544	0.871973	2.8223	4.45732	2.92429	2.89001	3.05539	2.08866
6430411K18Rik	NA	NA	NA	NA	NA	NA	0	0	0	0	0	0
6430503K07Rik	NA	NA	NA	NA	NA	NA	0	0.64097	0	0	0	0
6430531B16Rik	10.3153	0.336947	1.63277	0.206365	0.836506	NA	1.15266	1.33814	2.52931	1.16014	0.995725	0.338466
6430548M08Rik	492.983	-0.23291	0.288336	-0.807774	0.419221	0.772031	7.76201	6.99473	9.88293	7.76008	11.7718	9.74091
6430550D23Rik	21.9506	-0.0568944	1.16309	-0.0489167	0.960986	0.990675	1.71759	0.931413	1.75074	1.26779	1.49607	1.07479
6430553K19Rik	4.64224	0.331221	2.34214	0.141418	0.88754	NA	0.303006	0.165523	0.102422	0.440188	0.0868079	0.162158
6430562O15Rik	12.2967	-0.215744	1.50154	-0.143682	0.885752	NA	0.704308	0.900896	0.641856	1.2554	0.765234	0.420956
6430571L13Rik	68.4544	-0.121143	0.677359	-0.178846	0.858059	0.963829	2.21553	2.31947	2.58723	2.15137	3.121	3.85297
6430584L05Rik	NA	NA	NA	NA	NA	NA	0	0	0.0308076	0.0321464	0	0
6430628N08Rik	NA	NA	NA	NA	NA	NA	0	0.290578	0	0.0816823	0.0704062	0
6430706D22Rik	3047.59	0.0992123	0.168129	0.590095	0.555127	0.853545	76.6521	79.9161	84.2009	64.248	91.2965	70.6569
6430710C18Rik	125.188	-0.121019	0.521447	-0.232084	0.816473	0.950054	18.6124	5.51513	5.52807	15.6484	7.78411	6.46366
6530402F18Rik	10.0243	0.708106	1.67097	0.423768	0.671735	NA	0.153905	0.317406	0.228895	0.143824	0.141858	0.305444
6530403H02Rik	100.339	-0.242184	0.556463	-0.43522	0.663403	0.900749	2.89671	2.098	1.61609	3.68571	2.51285	1.22848
6530411M01Rik	1.90431	1.13194	4.44062	0.254906	0.798796	NA	0	0.819287	0	0	0.2003	0.147403
6720468P15Rik	66.115	0.361868	0.684748	0.528469	0.597174	0.873591	7.74275	3.13924	4.9725	5.669	2.83871	3.33982
6720483E21Rik	2.90633	1.51962	3.41378	0.445142	0.656217	NA	0.830897	0.155892	0	0.780418	0	0.334486
6720489N17Rik	214.787	-0.438273	0.393198	-1.11464	0.265006	0.634932	6.25498	6.26229	8.15277	8.7524	8.87395	5.41338
6820408C15Rik	76.6664	0.390914	0.667315	0.585802	0.558009	0.854536	3.13225	8.00764	6.05582	3.80968	4.35418	4.40098
6820426E19Rik	NA	NA	NA	NA	NA	NA	0	0	0	0.167417	0	0
6820431F20Rik	2746.62	-0.402692	0.157619	-2.55484	0.0106235	0.10214	49.7095	37.8471	61.8118	67.2249	52.608	36.7337
7420426K07Rik	NA	NA	NA	NA	NA	NA	0	0.197537	0	0	0	0.0524172
7420700N18Rik	3.97999	-2.14127	2.64152	-0.810621	0.417583	NA	0.0636866	0.0846867	0.267746	0.627736	0.179212	0.297258
7420701I03Rik	NA	NA	NA	NA	NA	NA	0	0	0	0	0	0
7530416G11Rik	NA	NA	NA	NA	NA	NA	0.341808	0	0	0	0.217411	0
7630403G23Rik	NA	NA	NA	NA	NA	NA	0	0	0	0	0	0
8030411F24Rik	7.23896	0.491284	2.10626	0.233249	0.815568	NA	0.795316	4.08364	7.67171	4.39398	0.438314	0.301104
8030423F21Rik	109.371	0.306225	0.552753	0.553999	0.579579	0.866241	3.38262	4.64756	4.89623	3.74265	2.97504	2.51886
8030423J24Rik	NA	NA	NA	NA	NA	NA	0	0	0	0	0	0
8030442B05Rik	NA	NA	NA	NA	NA	NA	0	0	0.137592	0.149049	0.132909	0
8030443G20Rik	NA	NA	NA	NA	NA	NA	0.176074	0	0	0	0.175029	0
8030451O07Rik	NA	NA	NA	NA	NA	NA	0	0	0	0.234146	0	0
8030455M16Rik	23.9779	0.0612193	1.10723	0.0552907	0.955907	0.98977	6.86408	2.47222	4.90309	5.82239	3.2704	2.07806
8030462N17Rik	395.831	-0.476654	0.301606	-1.58039	0.114018	0.424535	7.55223	9.39784	11.063	10.7969	13.9058	11.8885
8030474K03Rik	5058.39	-0.402392	0.140626	-2.86143	0.00421732	0.0540985	240.799	222.836	213.486	325.131	323.962	275.738
8430422H06Rik	NA	NA	NA	NA	NA	NA	0	0	0	0	0	0.134422
8430423G03Rik	NA	NA	NA	NA	NA	NA	0	0	0	0.391397	0.76435	0
8430426J06Rik	3.71118	1.32218	2.70028	0.489644	0.624386	NA	1.1892	1.0408	0.394552	0.43349	0.606966	0
8430429K09Rik	166.091	0.117092	0.443878	0.263792	0.79194	0.94167	11.4261	10.9865	13.8704	10.4811	11.7793	9.74045
8430430B14Rik	2.85833	-0.472534	2.97928	-0.158607	0.873979	NA	3.16406	1.90901	5.48191	9.02253	2.62209	8.73755
8430431K14Rik	NA	NA	NA	NA	NA	NA	0.0776755	0	0	0.0418433	0.036856	0
8430436N08Rik	NA	NA	NA	NA	NA	NA	0	0	0	0.13075	0	0
8430437L04Rik	NA	NA	NA	NA	NA	NA	0	0	0	0	0	0
9030025P20Rik	181.344	-0.373897	0.427006	-0.875623	0.381235	0.743454	9.51286	6.98709	8.77189	11.4689	10.7779	6.41464
9030204H09Rik	NA	NA	NA	NA	NA	NA	0	0	0	0	0	0
9030404E10Rik	NA	NA	NA	NA	NA	NA	0	0	0	0.114678	0	0
9030612E09Rik	50.0008	-0.391835	0.790926	-0.495413	0.620309	0.884637	1.8352	3.00734	3.2158	3.2583	3.24131	2.99524
9030616G12Rik	NA	NA	NA	NA	NA	NA	0	0	0	0	0	0.262467
9030619P08Rik	NA	NA	NA	NA	NA	NA	0.17231	0	0	0.379251	0.170116	0.370631
9030624G23Rik	385.426	-0.643251	0.30969	-2.07708	0.0377939	0.224809	12.7795	12.6261	15.1577	18.5709	23.5354	19.9213
9030625G05Rik	18.1266	-0.603502	1.26085	-0.478646	0.63219	0.890481	3.24676	1.11263	1.48908	4.46021	2.37041	1.78163
9130008F23Rik	16.3027	-0.187019	1.36749	-0.13676	0.89122	NA	1.65152	0.249696	0.541503	0.977195	0.659079	0.591143
9130015A21Rik	NA	NA	NA	NA	NA	NA	0	0	0	0.321712	0	0
9130015G15Rik	2.43961	1.55429	3.45454	0.449928	0.652762	NA	0.164266	0.0554033	0.172286	0	0.192607	0.0295323
9130015L21Rik	NA	NA	NA	NA	NA	NA	0	0	0	0	0	0.931689
9130019O22Rik	63.5857	0.309885	0.706987	0.438318	0.661156	0.899842	1.86886	1.50231	1.86748	1.16322	1.73556	1.12682
9130019P16Rik	6.01377	0.168564	2.05163	0.082161	0.934519	NA	0.126367	0.192858	0.108455	0.137781	0.15343	0.0436879
9130023H24Rik	156.163	0.261704	0.478627	0.54678	0.58453	0.869477	2.86317	5.03016	6.77228	3.36518	3.28292	4.09419
9130024F11Rik	5.32914	-0.00867666	2.1731	-0.00399276	0.996814	NA	0.206709	0.411489	0.216411	0.449865	0.18703	0.362124
9130204L05Rik	NA	NA	NA	NA	NA	NA	0	2.27775	2.05671	0	0	0
9130209A04Rik	NA	NA	NA	NA	NA	NA	0	0	0	0.348135	0	0
9130221F21Rik	10.2705	0.184704	1.61083	0.114664	0.908711	NA	0.514045	0.459211	0.192515	0.455474	0.421847	0.169548
9130221H12Rik	47.2308	-0.0930973	0.79905	-0.11651	0.907248	0.978525	3.31456	3.36411	3.57841	3.50059	4.17402	3.12604
9130227L01Rik	3.84784	-2.45528	2.84836	-0.861999	0.388688	NA	0.212687	0	0.111064	0.406574	0.24633	0.25914
9130230L23Rik	NA	NA	NA	NA	NA	NA	0	0	0	0.253374	0	0
9130401M01Rik	2947.03	0.353651	0.15529	2.27736	0.0227645	0.166392	378.469	280.677	266.848	315.2	236.738	285.738
9130409I23Rik	NA	NA	NA	NA	NA	NA	0.0562364	0	0	0	0.0524603	0
9230009I02Rik	NA	NA	NA	NA	NA	NA	0	0	0	0	0	0.0757526
9230019H11Rik	4.3087	0.401203	2.51966	0.159229	0.873488	NA	0.264713	0.13198	0	0.144793	0.15316	0.160649
9230020A06Rik	NA	NA	NA	NA	NA	NA	0	0	0	0	0	0
9230102K24Rik	NA	NA	NA	NA	NA	NA	0	0	0	0.101263	0	0
9230102O04Rik	NA	NA	NA	NA	NA	NA	0.252202	0	0	0	0	0
9230104L09Rik	NA	NA	NA	NA	NA	NA	0.657665	0	0	0.36246	0	0
9230105E05Rik	16.7834	0.75244	1.29834	0.579542	0.562223	NA	1.49287	0.962801	0.510138	0.655951	0.875103	0.232806
9230110F15Rik	NA	NA	NA	NA	NA	NA	0	0	0	0	0	0
9230112D13Rik	NA	NA	NA	NA	NA	NA	0	0	0	0	0.680541	0
9230112J17Rik	25.5428	-0.265669	1.06644	-0.249118	0.80327	0.946041	0.929012	1.02264	1.05484	1.27703	1.22616	0.672194
9230114K14Rik	226.938	-0.245564	0.383801	-0.639821	0.522289	0.834344	11.8415	9.03977	9.14229	15.1738	10.9813	11.4806
9230116L04Rik	33.2667	0.058921	0.947667	0.0621749	0.950424	0.988736	2.97142	1.90317	2.58364	2.50623	2.36362	2.03692
9230116N13Rik	148.415	0.20625	0.466219	0.442387	0.658209	0.898841	8.39908	7.52123	5.64783	8.18942	6.43769	7.11934
9230117E06Rik	1.49824	-2.18719	4.89218	-0.447078	0.654819	NA	0	0	0	0.931069	1.17183	6.26394
9330020H09Rik	277.369	0.234602	0.359751	0.652124	0.514321	0.830764	7.85948	9.18308	7.68646	8.24837	6.97402	8.11819
9330102E08Rik	187.047	0.721509	0.422486	1.70777	0.0876791	0.3725	6.04979	5.66576	4.67874	4.3248	3.20768	3.15892
9330104G04Rik	31.0125	0.0292356	0.975823	0.0299599	0.976099	0.994081	1.70745	1.3707	1.26793	2.00158	1.2101	1.13041
9330111N05Rik	NA	NA	NA	NA	NA	NA	0	0.107997	0	0.0899854	0.0777994	0
9330117O12Rik	NA	NA	NA	NA	NA	NA	0.285338	0	0	0	0	0
9330133O14Rik	179.58	-0.149191	0.43179	-0.345518	0.729705	0.925705	4.91059	5.94859	7.06004	6.39228	6.17764	7.10416
9330136K24Rik	216.406	-0.118888	0.420015	-0.283055	0.777134	0.937714	8.26064	8.79885	8.44775	12.9065	7.14498	6.86587
9330151L19Rik	232.072	0.167421	0.38011	0.440453	0.659609	0.899534	13.1746	7.91759	9.11726	11.4761	8.0308	7.02126
9330158H04Rik	112.19	0.252986	0.54132	0.467351	0.640249	0.893281	3.58643	3.90611	4.54487	3.90528	2.72347	2.56117
9330159F19Rik	25.1116	-0.304567	1.09092	-0.279183	0.780104	0.938639	0.418335	0.434006	0.201663	0.819894	0.352621	0.234505
9330159M07Rik	126.439	0.402836	0.517048	0.779107	0.435917	0.782162	5.0753	5.33492	5.57861	5.21608	3.2629	2.61936
9330162012Rik	18.9884	-1.70126	1.26016	-1.35004	0.177005	0.53289	0.635882	0.627684	1.50252	2.43326	1.94533	1.95128
9330162B11Rik	NA	NA	NA	NA	NA	NA	0	0	0	0.210696	0	0
9330175E14Rik	2.37534	-2.21091	3.45356	-0.640183	0.522054	NA	0.302276	0	0.0790732	0.330663	0.354325	0.0530993
9330175M20Rik	3.48986	-0.32051	2.67584	-0.119779	0.904658	NA	0.193567	0.0508724	0.161367	0.128335	0.143121	0.132735
9330178D15Rik	4.71644	-1.77208	2.38082	-0.744315	0.456686	NA	0.0269874	0.108224	0.140322	0.175933	0.222636	0.0927834
9330179D12Rik	11.6537	1.54972	1.58317	0.978872	0.327643	NA	2.44044	1.33222	0.564061	0.39803	0.860215	1.08682
9330182L06Rik	635.966	0.123157	0.263062	0.468167	0.639666	0.893281	14.6975	13.7736	17.1824	11.5733	16.2259	8.57228
9330182O14Rik	NA	NA	NA	NA	NA	NA	0.0962431	0	0.0502879	0	0	0
9330188P03Rik	NA	NA	NA	NA	NA	NA	0	0	0	0	0	0
9330198I05Rik	4.6891	0.584767	2.30509	0.253685	0.799739	NA	0.25322	0.335039	0.211465	0.221452	0.187784	0.211451
9330199G10Rik	NA	NA	NA	NA	NA	NA	0	0.0816373	0	0.213553	0	0
9430007A20Rik	NA	NA	NA	NA	NA	NA	0	0	0	0	0	0
9430014N10Rik	NA	NA	NA	NA	NA	NA	0	0	0	0	0	0
9430015G10Rik	1292.27	0.455622	0.19372	2.35197	0.0186744	0.148251	59.6262	54.7468	55.3001	43.6676	44.6235	37.2662
9430018G01Rik	177.806	-0.616191	0.441463	-1.3958	0.162776	0.507832	4.63279	2.3025	3.08715	5.97552	4.54464	2.8705
9430019J16Rik	NA	NA	NA	NA	NA	NA	0	0	0.1678	0	0	0
9430021M05Rik	36.4171	1.19379	0.919421	1.29842	0.194144	0.555678	3.42337	1.91972	2.11973	1.11091	1.25958	0.805663
9430037G07Rik	266.471	-0.00701519	0.370233	-0.018948	0.984883	0.995457	8.78016	7.9912	7.77146	11.3093	6.78232	6.93371
9430038I01Rik	462.208	0.256684	0.28253	0.908518	0.363604	0.731653	53.1824	56.4454	59.2067	48.0082	50.3144	52.9504
9430041J12Rik	1.91329	-2.86458	4.08756	-0.700805	0.483425	NA	0.0450456	0	0.140975	0.100323	0.251448	0
9430060I03Rik	87.0446	0.734055	0.607359	1.2086	0.226816	0.593241	9.76247	6.34336	5.61753	7.4471	3.32926	4.77543
9430065F17Rik	71.2456	0.309881	0.662202	0.467955	0.639817	0.893281	10.7171	9.54512	6.57647	10.9335	6.91475	8.18172
9430069I07Rik	NA	NA	NA	NA	NA	NA	0	0	0	0	0	0
9430078K24Rik	4.50769	-2.80792	2.67331	-1.05035	0.293557	NA	0.452687	0	0.223003	1.20753	0.604367	0.525261
9430083A17Rik	66.5176	-0.0889576	0.678344	-0.131139	0.895665	0.975103	2.62547	2.1264	1.75851	2.59552	2.66109	1.70931
9430091E24Rik	48.5419	0.143712	0.787594	0.18247	0.855214	0.962805	1.95198	1.92724	2.03457	1.84797	1.79951	1.27765
9530002B09Rik	NA	NA	NA	NA	NA	NA	0.192935	0.509102	1.01933	0	0	0
9530003J23Rik	NA	NA	NA	NA	NA	NA	0	0.136327	0	0	0	0.0730381
9530014B07Rik	NA	NA	NA	NA	NA	NA	0	0	0	0	0	0
9530020I12Rik	NA	NA	NA	NA	NA	NA	0.16319	0.430737	0.515146	0	0	0
9530026F06Rik	NA	NA	NA	NA	NA	NA	0.185884	0	0	0	0	0
9530026P05Rik	27.547	0.14604	1.03623	0.140935	0.887921	0.97261	6.46243	2.36935	2.59917	5.72555	2.53332	3.40854
9530027J09Rik	10.9232	-0.541741	1.6309	-0.332174	0.739758	NA	0.940923	0.374525	0.832978	0.544494	1.33074	0.342615
9530036O11Rik	3.32242	0.963627	2.74045	0.351631	0.725115	NA	0.226342	0.0863444	0.033159	0.0349688	0.148293	0.11107
9530051G07Rik	15.548	-0.159822	1.34202	-0.119091	0.905204	NA	0.390166	0.274732	0.128616	0.425931	0.338846	0.353583
9530052C20Rik	5.95899	-4.12263	2.49044	-1.65538	0.0978471	NA	0	0.0812328	0.127369	0.433463	0.393967	0.0844211
9530052E02Rik	7.55522	-0.234181	1.89823	-0.123368	0.901816	NA	0.673458	0.963106	2.26011	0.755111	1.16875	1.08403
9530053A07Rik	2.91947	-0.119367	3.77762	-0.0315984	0.974792	NA	0	0.0442837	0.0989633	0.064284	0	0
9530059O14Rik	17.1427	-0.955876	1.30589	-0.73197	0.464187	0.800893	0.487591	0.185269	0.460049	0.658015	0.573211	0.0802866
9530062K07Rik	53.5327	0.467267	0.771752	0.605463	0.544872	0.845972	13.0404	11.5671	11.0343	13.8617	7.39286	11.1959
9530068E07Rik	2337.27	-0.0894735	0.16597	-0.539094	0.589822	0.871527	92.0139	89.3683	104.866	95.3859	107.666	96.0554
9530077C05Rik	1289.67	0.427927	0.19531	2.19101	0.0284509	0.190833	81.199	60.9541	68.1873	57.9477	50.9929	45.1143
9530080O11Rik	67.7884	0.171598	0.675561	0.254009	0.799489	0.944423	7.34036	5.95398	6.92116	5.38748	6.4625	4.30973
9530082P21Rik	210.804	0.0936651	0.395414	0.236878	0.812751	0.949426	6.77127	6.88562	5.99041	6.60094	6.85189	5.17407
9530091C08Rik	33.0676	-0.389812	0.954902	-0.408222	0.68311	0.908891	0.37842	0.273127	0.303035	0.671848	0.289044	0.264678
9630001P10Rik	15.9895	0.808688	1.34649	0.600591	0.548112	NA	0.542776	0.650775	0.74338	0.270226	0.458143	0.682977
9630013A20Rik	NA	NA	NA	NA	NA	NA	0	0	0	0	0	0
9630013K17Rik	NA	NA	NA	NA	NA	NA	0	0	0	0	0.248629	0.180797
9630028B13Rik	33.9687	0.164666	0.933069	0.176478	0.859919	0.96457	1.49239	0.771583	0.920651	1.44214	0.687411	0.41032
9630028H03Rik	NA	NA	NA	NA	NA	NA	0	0	0	0	0	0.0298331
9630028I04Rik	7.95469	0.327022	1.84756	0.177002	0.859506	NA	0.627297	0.20329	0.256283	0.252306	0.358215	0.192477
9830107B12Rik	12.3245	-0.288631	1.48899	-0.193843	0.846299	NA	0.351593	0.303262	0.23421	0.511815	0.34585	0.160116
9830132P13Rik	20.6259	0.0595389	1.18112	0.0504089	0.959797	0.990664	0.626653	0.343816	0.33879	0.555133	0.381557	0.382674
9830166K06Rik	9.69073	-0.722071	1.67461	-0.431187	0.666332	NA	0.210005	0.323582	0.364937	0.419967	0.484428	0.24338
9930012K11Rik	62.2784	-1.88408	0.760593	-2.47712	0.0132446	0.118786	2.14785	0.825639	1.20225	4.70292	6.05398	4.6868
9930014A18Rik	24.4141	-0.995504	1.10343	-0.902189	0.366956	0.733223	0.26276	0.267258	0.349658	0.540676	0.581136	0.616172
9930021J03Rik	1800.59	0.175425	0.174675	1.00429	0.315239	0.686292	24.1443	21.2072	18.6207	21.8568	19.7869	14.0963
9930104L06Rik	405.312	0.157565	0.296912	0.530679	0.595641	0.873094	17.2488	12.9538	13.9864	16.1833	12.4244	8.95847
9930111H07Rik	9.24031	0.387895	1.71702	0.225912	0.82127	NA	3.04789	1.33677	1.97176	1.78867	1.61208	1.75755
9930111J21Rik1	18.2369	-0.235071	1.25322	-0.187574	0.85121	0.961477	0.591458	0.338896	0.262587	0.926261	0.328532	0.187322
9930111J21Rik2	2.48021	-2.4045	3.64248	-0.660129	0.509171	NA	0.174944	0	0	0.156757	0.21643	0.0449277
a	NA	NA	NA	NA	NA	NA	0	0.376036	0.308889	0	0	0
A030001D20Rik	154.567	0.391737	0.464084	0.844109	0.398609	0.756958	15.2469	11.0759	10.5988	10.0493	11.0958	7.09229
A130010J15Rik	559.837	-0.0683712	0.261317	-0.261641	0.793598	0.942395	11.3511	13.1834	15.1063	12.6578	14.1317	13.2873
A130030D18Rik	NA	NA	NA	NA	NA	NA	0	0	0	0	0	0
A130077B15Rik	602.882	-0.43481	0.270978	-1.6046	0.108583	0.414203	30.263	15.4552	14.7462	51.735	17.9025	12.3488
A1bg	NA	NA	NA	NA	NA	NA	0	0	0	0	0	0
A1cf	7.80813	-1.09981	1.87066	-0.587927	0.556581	NA	0.150456	0.0385233	0.0562186	0.297613	0.0894579	0.0185105
A230001M10Rik	NA	NA	NA	NA	NA	NA	0	0	0	0	0	0.0394567
A230009B12Rik	NA	NA	NA	NA	NA	NA	0.284959	0.149528	0	0.124903	0	0
A230020J21Rik	5.9377	-0.00861779	2.08225	-0.0041387	0.996698	NA	0.468653	0.397513	0.624238	0.455523	0.499759	0.309368
A230028O05Rik	NA	NA	NA	NA	NA	NA	0.0346614	0	0.0356436	0	0	0
A230050P20Rik	245.776	0.753538	0.370337	2.03473	0.0418776	0.240301	28.5231	15.7161	15.42	17.9989	9.9124	10.3718
A230051N06Rik	NA	NA	NA	NA	NA	NA	0.487159	0	0	0	0	0.178131
A230056J06Rik	14.14	0.222626	1.44725	0.153826	0.877747	NA	0.795158	0.240285	0.409378	0.329763	0.473813	0.335324
A230056P14Rik	76.5039	-0.145313	0.677674	-0.214429	0.830212	0.95515	8.42145	3.70315	6.40049	5.8433	7.59058	6.54443
A230057D06Rik	2.2764	-0.97506	4.11353	-0.237037	0.812628	NA	0	0.131334	0.10292	0	0.455756	0
A230070E04Rik	32.4678	-3.50228	1.05865	-3.30825	0.000938803	0.0182059	0.309154	0.303838	0.309064	2.77571	5.67132	3.23433
A230072C01Rik	137.384	-0.0238997	0.486417	-0.0491342	0.960812	0.990675	9.53379	5.54085	7.30117	11.3105	5.25118	6.10832
A230072E10Rik	128.191	0.402599	0.499352	0.806242	0.420103	0.772276	3.84278	3.94934	4.88701	3.11963	3.00482	2.66573
A230077H06Rik	15.4535	0.130216	1.34739	0.0966431	0.92301	NA	0.517717	0.650484	0.302821	0.614225	0.476301	0.424249
A230083G16Rik	2.74967	0.128916	3.08916	0.0417317	0.966713	NA	0.72916	0.380171	0	0.319638	0.859085	0.209416
A230103J11Rik	38.5138	0.624879	0.886873	0.704587	0.481067	0.811872	2.17674	2.12143	2.41486	1.19719	1.75325	1.51089
A230107N01Rik	30.4938	0.467624	0.981781	0.476302	0.633859	0.891463	1.7226	1.57224	1.48815	1.09901	1.39537	0.493232
A230108P19Rik	12.0552	0.469818	1.52054	0.308982	0.757335	NA	0.549225	0.522299	0.57364	0.556355	0.290222	0.353304
A2m	53.0431	0.0883087	0.768272	0.114945	0.908489	0.97881	1.78404	0.583904	1.16251	1.38202	0.740912	0.531812
A2ml1	103.526	-0.196387	0.551788	-0.355911	0.721907	0.923612	2.23647	1.82979	1.64331	2.3755	2.45148	1.56776
A330008L17Rik	NA	NA	NA	NA	NA	NA	0.113855	0	0	0	0	0
A330009N23Rik	7.16196	0.741583	1.94452	0.381371	0.702928	NA	1.35576	0.355653	0.41857	0.595038	0.342883	0.689543
A330015K06Rik	NA	NA	NA	NA	NA	NA	0	0.245125	0.144474	0.0504369	0	0
A330023F24Rik	2.05188	2.97982	3.69948	0.80547	0.420549	NA	0.0675615	0.0449541	0.0528525	0.0184802	0	0.0233323
A330032B11Rik	1786.66	0.620342	0.214064	2.89793	0.00375635	0.0500204	93.683	125.426	126.119	83.3347	65.8575	79.6051
A330033J07Rik	15.1688	-0.607451	1.37111	-0.443035	0.65774	NA	0.453306	0.321859	0.873171	0.723382	0.517892	0.316075
A330035P11Rik	94.6252	0.399218	0.594588	0.67142	0.501953	0.824984	4.47474	3.75837	3.43628	2.49289	4.26444	2.66882
A330040F15Rik	2.07809	2.5368	3.71465	0.682918	0.494659	NA	0.255647	0.332643	0.267474	0.139645	0	0.545202
A330041J22Rik	34.6229	0.39513	0.934573	0.422792	0.672447	0.905239	3.20774	1.75611	1.43772	1.88112	1.93352	1.76587
A330048O09Rik	NA	NA	NA	NA	NA	NA	0.388833	0	0	0	0.672756	0.237828
A330049N07Rik	145.513	-0.315094	0.494526	-0.637163	0.524019	0.834748	11.7649	4.53146	4.33519	10.8726	8.57199	4.73975
A330069E16Rik	3013.12	0.69226	0.191866	3.60804	0.000308518	0.00769528	557.645	628.018	639.655	465.923	334.845	431.529
A330070K13Rik	NA	NA	NA	NA	NA	NA	0	0	0	0	0	0
A330074K22Rik	2.30076	2.42443	3.53489	0.685859	0.492802	NA	0.0817592	0.214855	0.0427771	0.134167	0	0.0859336
A330076C08Rik	38.1635	-0.974038	0.890839	-1.09339	0.274221	0.645233	2.01543	0.981622	1.22254	4.16945	2.01906	1.88546
A330076H08Rik	2.77045	-5.05959	3.80375	-1.33016	0.183466	NA	0	0	0	0.761459	0.21627	0.0403987
A330093E20Rik	NA	NA	NA	NA	NA	NA	0	0	0	0	0	0
A330094K24Rik	10.3726	0.502459	1.66658	0.301492	0.76304	NA	0.928687	1.62051	0.7501	1.68289	0.491425	0.941569
A330102I10Rik	29.839	-0.101007	0.996669	-0.101344	0.919277	0.982189	10.4817	5.018	5.59796	10.9839	6.8875	8.5874
A3galt2	1.94652	-4.34249	4.40805	-0.985126	0.324562	NA	0	0	0	0.12617	0.133856	0.0805245
A430005L14Rik	1139.99	-0.349243	0.201273	-1.73517	0.0827099	0.362446	128.223	120.969	116.275	168.327	171.229	200.227
A430033K04Rik	124.888	-1.54928	0.51361	-3.01645	0.00255756	0.0382575	1.4897	2.15115	2.30327	4.34009	6.97684	5.06973
A430035B10Rik	34.1716	-0.538925	0.937089	-0.575106	0.56522	0.858595	1.94057	1.11082	1.45035	2.84624	1.75639	2.26897
A430046D13Rik	187.32	0.380736	0.418678	0.909376	0.363152	0.731234	9.34093	10.4121	10.1134	7.85928	8.23649	7.41012
A430057M04Rik	7.3036	-2.65589	2.24203	-1.18459	0.236178	NA	0.127487	0	0.182032	0.233122	0.14057	0.172645
A430078G23Rik	17.2013	-0.509067	1.29811	-0.392159	0.694941	0.914652	0.871708	0.35369	0.27672	0.817647	0.821334	0.27775
A430078I02Rik	24.5988	0.331925	1.12314	0.295533	0.767587	0.936836	0.668369	1.23845	1.18331	1.00529	0.577566	0.715014
A430085M09Rik	7.29292	-0.0457678	1.96486	-0.0232932	0.981416	NA	0.651977	0.31067	0	0.609633	0.38969	0.129196
A430088P11Rik	26.157	1.07776	1.08913	0.989563	0.322388	0.692857	0.521024	1.07465	0.499084	0.48526	0.31674	0.34084
A430089I19Rik	NA	NA	NA	NA	NA	NA	0.227301	0	0.0853197	0.248466	0	0
A430090L17Rik	7.56876	-1.4327	1.95439	-0.733065	0.463519	NA	0.278302	0.0334498	0.0263988	0.58062	0.139882	0.12298
A430093F15Rik	2.41891	3.25371	3.46927	0.937864	0.348315	NA	0.295825	0.129912	0.206064	0.0538614	0	0.0345249
A4galt	13.4128	-1.39107	1.45906	-0.953401	0.340387	NA	0.438389	0.312012	0.552266	1.43484	0.810442	0.525253
A4gnt	NA	NA	NA	NA	NA	NA	0	0	0	0.0747917	0.0317488	0
A530006G24Rik	NA	NA	NA	NA	NA	NA	0	0	0	0	0	0
A530010L16Rik	NA	NA	NA	NA	NA	NA	0	0	0	0	0	0
A530013C23Rik	NA	NA	NA	NA	NA	NA	0	0	0	0	0	0
A530016L24Rik	NA	NA	NA	NA	NA	NA	0	0	0	0.0815451	0	0.130636
A530021J07Rik	NA	NA	NA	NA	NA	NA	0	0	0	0.089254	0	0
A530032D15Rik	4.67858	-0.18175	2.36985	-0.0766926	0.938868	NA	0.260709	0.156925	0.561893	0.468988	0.113612	0.169481
A530046M15Rik	NA	NA	NA	NA	NA	NA	0	0	0	0.0794979	0	0
A530050N04Rik	10.1065	0.106183	1.67013	0.0635775	0.949307	NA	0.301129	1.10779	0.564775	0.596458	0.564548	0.507277
A530053G22Rik	NA	NA	NA	NA	NA	NA	0	0	0	0	0	0
A530058N18Rik	NA	NA	NA	NA	NA	NA	0	0.197325	0	0	0	0.0523238
A530064D06Rik	74.78	-0.251608	0.67576	-0.372334	0.709644	0.919668	8.62164	1.85526	1.77973	7.06079	3.78991	2.59909
A530065N20Rik	4.60359	-1.10119	2.75935	-0.399076	0.689838	NA	0.0996215	0.0325421	0	0.55893	0.0235002	0
A530072M11Rik	77.8728	-0.637018	0.69671	-0.914324	0.360547	0.729463	5.04114	1.94001	3.85427	4.26328	6.36262	5.06566
A530088E08Rik	22.1345	-0.810328	1.14838	-0.705626	0.480421	0.81179	1.31137	0.792778	0.917537	2.77873	1.27577	1.02715
A630001G21Rik	7.67173	-2.08707	1.94915	-1.07076	0.284276	NA	0.314807	0.0696747	0.164582	0.972176	0.487396	0.437601
A630001O12Rik	NA	NA	NA	NA	NA	NA	0	0	0	0	0	0
A630010A05Rik	1.96551	2.48816	4.04613	0.614949	0.538589	NA	0.134352	0.176721	0.423225	0	0.0633462	0
A630012P03Rik	NA	NA	NA	NA	NA	NA	0	0.0702428	0.0554379	0.0581488	0.0992206	0.111682
A630019I02Rik	2.04389	3.49403	4.82141	0.724691	0.468642	NA	0.342998	0	0	0	0.00666346	0.0534319
A630023A22Rik	15.4701	-0.734094	1.35565	-0.541509	0.588157	NA	1.31673	0.832673	1.28667	2.48279	1.30482	1.0484
A630023P12Rik	NA	NA	NA	NA	NA	NA	0.344744	0.888273	0	0	0.369436	0
A630066F11Rik	100.175	-0.0346157	0.561796	-0.0616162	0.950869	0.988736	8.69225	9.40205	12.0661	9.91035	9.8472	9.78644
A630072M18Rik	420.539	0.294602	0.298642	0.98647	0.323902	0.695054	10.2599	7.21747	6.03647	9.78024	5.46286	5.92497
A630073D07Rik	NA	NA	NA	NA	NA	NA	0	0	0	0	0	0
A630075F10Rik	15.932	-0.746537	1.34015	-0.557053	0.577491	NA	1.00726	0.38409	0.716266	1.39144	0.890728	0.49691
A630076J17Rik	NA	NA	NA	NA	NA	NA	0	0	0	0	0	0
A630077J23Rik	NA	NA	NA	NA	NA	NA	0	0	0	0	0	0
A630089N07Rik	332.29	-0.487804	0.33798	-1.44329	0.148938	0.486906	20.8834	10.3801	7.80718	37.0942	12.4786	7.88575
A630095E13Rik	NA	NA	NA	NA	NA	NA	0.374984	0	0	0.41401	0	0
A630095N17Rik	3.74546	-0.911283	2.93451	-0.31054	0.75615	NA	0	2.644	1.07456	0.557799	1.09785	1.78975
A730004F24Rik	NA	NA	NA	NA	NA	NA	0	0	0	0	0	0
A730006G06Rik	2.22454	4.65911	3.87326	1.20289	0.229018	NA	0.306606	0.229147	0.121462	0	0	0.121313
A730008H23Rik	490.823	-0.0147552	0.297547	-0.0495894	0.96045	0.990675	21.0066	21.7668	24.4016	17.1908	30.2228	20.026
A730013G03Rik	81.1318	0.809569	0.649698	1.24607	0.212739	0.578055	3.42797	7.27706	5.78545	3.08641	2.98501	3.62431
A730017C20Rik	68.1903	-0.340236	0.680112	-0.500265	0.616888	0.883512	3.32083	3.53424	2.91932	5.53447	3.79679	3.26646
A730017L22Rik	174.489	-0.354395	0.451346	-0.785196	0.432339	0.779167	7.14715	6.34814	7.12053	12.5683	6.49559	4.64588
A730018C14Rik	NA	NA	NA	NA	NA	NA	0	0	0	0	0	0
A730020E08Rik	15.4571	-0.215492	1.34955	-0.159678	0.873135	NA	1.11027	0.978894	1.24766	1.7173	0.94542	0.282538
A730020M07Rik	2.45046	-1.5698	3.37826	-0.464678	0.642162	NA	0.168334	0	0.131897	0.22993	0.0777935	0.0292374
A730035I17Rik	4.17796	1.20982	2.52729	0.478702	0.632151	NA	0.310924	0.448866	1.03998	0.34073	0.108828	0.22702
A730036I17Rik	NA	NA	NA	NA	NA	NA	0	0	0	0.14974	0.0506189	0.0382334
A730043L09Rik	1.60992	-0.592339	4.77028	-0.124173	0.901178	NA	0.196558	0	0	0.645136	0	0.14194
A730046J19Rik	0.642524	-0.507503	4.82055	-0.105279	0.916154	NA	0.0390561	0	0	0.0212848	0.0179065	0
A730056A06Rik	NA	NA	NA	NA	NA	NA	0	0.044503	0	0	0	0.0232461
A730063M14Rik	NA	NA	NA	NA	NA	NA	0	0	0	0	0	0
A730081D07Rik	14.0618	-0.515568	1.41768	-0.363669	0.716105	NA	1.18137	0.461475	0.697708	1.22803	0.986889	0.400499
A730082K24Rik	3.18876	-0.541004	2.90189	-0.186432	0.852106	NA	0.175208	0.153223	0	0.38134	0.163446	0.243505
A730085K08Rik	NA	NA	NA	NA	NA	NA	0	0	0	0	0	0
A730090N16Rik	2.35909	-0.728418	3.33071	-0.218697	0.826886	NA	0.246127	0.108764	0.2578	0.358566	0.231988	0
A730098A19Rik	NA	NA	NA	NA	NA	NA	0.470982	0.203854	0.165312	0.172586	0	0
A830009L08Rik	1.88743	0.262805	3.48341	0.0754448	0.939861	NA	0.0731059	0.0481808	0.0762109	0.0398884	0.0679152	0.102026
A830010M20Rik	209.784	-0.22873	0.408942	-0.559321	0.575942	0.86438	3.32154	2.14414	2.55468	3.26332	3.24814	2.13156
A830011K09Rik	3.4344	-0.835984	2.67512	-0.312503	0.754659	NA	0.216665	0.0673269	0.149263	0.275665	0.158577	0.0615929
A830018L16Rik	73.0843	0.367766	0.675331	0.544571	0.586048	0.870117	0.85891	1.35099	1.65317	1.00087	0.739321	0.793084
A830019L24Rik	NA	NA	NA	NA	NA	NA	0	0	0	0	0	0
A830019P07Rik	NA	NA	NA	NA	NA	NA	0	0.0786164	0	0.0643788	0.0547235	0
A830029E22Rik	NA	NA	NA	NA	NA	NA	0	0	0	0	0	0
A830035O19Rik	69.7774	0.399946	0.670561	0.596436	0.550884	0.850907	4.46613	5.1129	5.06318	4.34913	3.4345	2.69352
A830036E02Rik	8.55368	1.43996	1.77979	0.809059	0.418481	NA	0.430992	0.320498	0.18441	0.132904	0.174896	0.164595
A830052D11Rik	18.3222	-0.132159	1.25543	-0.10527	0.916162	0.980898	2.21208	1.8248	0.331688	3.26886	1.65466	3.36419
A830082K12Rik	10.9922	-0.344972	1.57697	-0.218757	0.826839	NA	0.576809	0.350517	0.37392	0.681775	0.536245	0.435487
A830082N09Rik	95.8428	-0.15144	0.573117	-0.264238	0.791596	0.941577	1.19914	0.835404	1.07273	1.50069	0.886148	0.848468
A930001A20Rik	NA	NA	NA	NA	NA	NA	0.0862953	0	0	0.0945977	0	0
A930001C03Rik	NA	NA	NA	NA	NA	NA	0	0	0.194725	0.330367	0	0
A930002C04Rik	3.6154	-3.19895	3.12474	-1.02375	0.305953	NA	0	0.154816	0.0814806	0.425382	0.216887	0
A930003A15Rik	NA	NA	NA	NA	NA	NA	0	0	0	0	0.128881	0
A930003O13Rik	2.85412	-0.817146	2.93109	-0.278786	0.780409	NA	0.11522	0.0772263	0.416067	0.190989	0.166331	0.0403342
A930004D18Rik	14.662	1.73342	1.44533	1.19932	0.230404	NA	0.27237	0.938375	0.515427	0.132729	0.217429	0.582363
A930005H10Rik	73.3627	-0.064726	0.679746	-0.0952209	0.924139	0.982989	14.7955	14.2246	18.6654	22.5323	11.7099	20.3621
A930006I01Rik	NA	NA	NA	NA	NA	NA	0	0	0	0	0	0
A930006K02Rik	48.0552	0.148339	0.80545	0.184169	0.853881	0.961944	10.3496	13.1516	9.03146	13.5899	9.98126	9.99549
A930007A09Rik	99.8515	-0.276084	0.560117	-0.492904	0.62208	0.885799	2.4055	2.23694	1.88357	3.26786	2.62988	1.9024
A930007I19Rik	7.4139	-0.661072	1.88276	-0.351119	0.725499	NA	0.264233	0.291267	0.0460588	0.433042	0.491	0.427607
A930009A15Rik	NA	NA	NA	NA	NA	NA	0	0	0	0	0	0
A930011G23Rik	18.1924	1.80127	1.27878	1.40858	0.15896	0.501772	1.49855	0.455922	0.501535	0.465075	0.131293	0.0977913
A930012L18Rik	12.6287	-0.349251	1.47893	-0.236151	0.813315	NA	0.617517	0.45213	0.251522	0.986212	0.534438	0.54414
A930013F10Rik	46.6395	0.278848	0.870214	0.320437	0.748637	0.931054	3.73307	1.31768	1.21224	1.49611	2.49964	1.4402
A930015D03Rik	NA	NA	NA	NA	NA	NA	0	0.277177	0	0.0299466	0	0
A930016O22Rik	40.1834	-0.0568368	0.867093	-0.0655487	0.947737	0.988298	1.81109	1.35015	1.83078	2.29462	1.33668	1.58786
A930017K11Rik	47.2795	0.527455	0.806279	0.654185	0.512993	0.830293	1.7529	2.18211	2.93208	1.08867	1.8933	1.39605
A930017M01Rik	4.19421	-1.29678	2.64872	-0.489588	0.624426	NA	0.0279755	0.101089	0	0.207296	0.103889	0.233214
A930018P22Rik	10.4235	1.22174	1.69253	0.721843	0.470391	NA	1.42156	2.64194	4.92506	1.33712	0.607689	1.76628
A930019D19Rik	1.32553	-2.65063	4.86086	-0.545301	0.585547	NA	0	0	0	1.23152	0	0.113878
A930024E05Rik	4.85636	-1.02523	2.33204	-0.439628	0.660207	NA	0.39345	0.0739317	0.0586758	0.552586	0.261678	0.315079
A930031H19Rik	NA	NA	NA	NA	NA	NA	0	0.20545	0.164675	0.172562	0	0
A930033H14Rik	1.8543	-4.17093	4.81473	-0.866284	0.386334	NA	0	0	0	0.363395	0.0306647	0
A930037H05Rik	420.103	0.16726	0.295352	0.566308	0.571184	0.861943	16.4558	13.6473	16.1166	16.4555	11.961	10.3
A930041C12Rik	11.4585	-0.828473	1.56299	-0.530055	0.596074	NA	4.92065	4.66802	6.71594	12.329	9.21363	8.33361
AA387883	1.89457	-4.64851	4.45568	-1.04328	0.29682	NA	0	0	0	0.434466	0.312741	0.0463916
AA388235	7.62183	-0.3981	1.96959	-0.202123	0.839821	NA	0.274843	0.0395772	0.45355	0.216925	0.0777781	0.0590785
AA413626	NA	NA	NA	NA	NA	NA	0	0	0	0	0	0
AA414768	4.55273	1.3397	2.4844	0.539246	0.589717	NA	0.599981	0.320897	0.493188	0.311425	0.128267	0
AA465934	NA	NA	NA	NA	NA	NA	0	0	0	0	0	0
AA467197	65.6013	0.77525	0.694047	1.117	0.263995	0.633862	24.0264	25.3824	32.8706	18.5618	14.4644	10.6586
AA536875	2.29737	-1.43653	3.48647	-0.412029	0.680318	NA	0.172903	0	0.119776	0.186204	0.107992	0.197275
AA543186	27.0901	0.407599	1.06819	0.381579	0.702773	0.918051	1.59185	1.92151	2.03661	1.96726	0.983155	2.49964
AA543401	3.71808	-0.920571	2.63482	-0.349387	0.726799	NA	0.30561	0.132628	0.394354	0.223225	0.811867	0.40395
AA545190	NA	NA	NA	NA	NA	NA	0	0	0	0	0	0
AA619741	NA	NA	NA	NA	NA	NA	0	0	0	0	0	0
AA792892	NA	NA	NA	NA	NA	NA	0	0	0.222659	0.372214	0	0.0749111
AA986860	73.0228	-1.21995	0.69511	-1.75505	0.0792504	0.354414	3.01521	0.881466	1.01424	4.64456	3.57538	1.82261
Aaas	3070.01	0.312255	0.153842	2.02972	0.0423849	0.241915	205.755	202.497	187.343	168.524	180.071	147.223
Aacs	2326.1	0.274925	0.164946	1.66676	0.0955625	0.389181	80.0707	74.5476	83.9034	65.7361	68.8955	56.9013
Aadac	NA	NA	NA	NA	NA	NA	0	0	0	0.09985	0	0
Aadacl2	NA	NA	NA	NA	NA	NA	0	0	0	0	0	0
Aadacl3	NA	NA	NA	NA	NA	NA	0	0	0	0	0	0
Aadacl4	NA	NA	NA	NA	NA	NA	0	0	0	0	0	0
Aadat	6.55322	3.07298	2.31306	1.32853	0.184001	NA	1.0214	0.398027	0.125899	0	0.338145	0.459648
Aaed1	612.364	0.199451	0.254683	0.783135	0.433548	0.779828	121.623	85.6633	85.8228	101.389	91.4089	96.4923
Aagab	3604.49	-0.281317	0.150277	-1.87199	0.0612078	0.304284	57.5152	52.7478	58.4725	69.4656	70.4636	58.6062
Aak1	813.219	-0.633133	0.233781	-2.70823	0.00676429	0.0763121	2.98407	2.81224	3.19685	4.2245	5.16214	3.26437
Aamdc	485.335	0.214911	0.280921	0.765023	0.444258	0.787712	84.3008	93.2628	78.0809	87.9484	82.1563	106.154
Aamp	8221.85	0.242437	0.131973	1.83703	0.066206	0.317652	529.921	506.871	471.588	471.56	462.982	438.144
Aanat	4.19384	-1.04934	2.4839	-0.422456	0.672692	NA	0.181068	0.235627	0.663801	0.714264	0.234502	0.174142
Aar2	1779.17	0.10369	0.175919	0.58942	0.555579	0.853794	42.0156	54.3612	58.5455	41.7197	52.6099	42.4028
Aard	191.695	0.600757	0.528723	1.13624	0.255856	0.626159	12.2159	28.7673	40.516	18.0613	9.644	3.78686
Aars	5835.65	-0.181018	0.137547	-1.31604	0.18816	0.547374	122.605	152.949	165.292	143.497	185.923	136.667
Aars2	461.054	-0.589227	0.295585	-1.99343	0.0462147	0.256256	11.7328	9.09572	11.38	15.4145	17.4046	15.3862
Aarsd1	805.87	-0.308003	0.227258	-1.3553	0.175322	0.530225	59.0775	67.9071	71.7889	76.673	93.1725	95.3078
Aasdh	908.381	0.0449991	0.217162	0.207214	0.835843	0.957364	23.1742	25.7042	21.4831	22.7114	26.9663	20.0998
Aasdhppt	1784.87	0.00469006	0.182334	0.0257223	0.979479	0.994504	69.7856	55.859	55.1809	64.6901	64.8979	60.6832
Aass	10.0584	-1.2762	1.78008	-0.716937	0.473413	NA	0.0351481	0.404972	0.110853	0.237728	0.353504	0.370979
Aatf	2492.69	0.187801	0.163756	1.14683	0.251451	0.621849	167.084	149.949	155.656	143.19	152.293	136.014
Aatk	36.4562	-0.249299	0.906219	-0.275098	0.783241	0.939504	0.543939	0.549517	0.930783	0.736421	0.630143	0.379905
AB124611	37.7169	0.904067	0.888167	1.0179	0.308724	0.680948	6.86556	4.83112	3.44157	4.15267	2.55733	1.59901
Abat	178.888	-0.051849	0.44063	-0.11767	0.906329	0.978516	3.98807	3.28733	4.39621	5.37274	2.79284	2.36552
Abca1	4234.83	0.152587	0.167342	0.91183	0.361858	0.730587	52.9539	33.5409	34.7579	41.137	38.0163	17.6738
Abca12	17.0514	-1.04032	1.32674	-0.784123	0.432968	0.779353	0.127117	0.126283	0.110338	0.138719	0.524012	0.0733237
Abca13	25.8239	0.743308	1.07065	0.694259	0.48752	0.815601	0.330181	0.106178	0.0886442	0.156794	0.0874111	0.0660625
Abca14	27.7935	1.47891	1.06992	1.38226	0.166893	0.514713	0.377358	0.567298	1.24668	0.107225	0.269881	0.158388
Abca15	13.7123	4.71533	1.84402	2.55709	0.0105551	NA	0.184304	0.468441	0.680378	0	0.0306682	0.0115524
Abca16	218.29	-0.347326	0.392768	-0.884301	0.376534	0.740178	4.60034	3.01433	3.46708	5.47602	4.51941	2.87843
Abca17	178.168	0.927934	0.429475	2.16063	0.0307242	0.199592	4.99319	4.15609	3.47514	2.46094	2.53401	1.08933
Abca2	2532.2	-0.235004	0.178377	-1.31746	0.187685	0.546833	31.6062	23.2473	29.3771	32.6185	34.4033	19.6225
Abca3	1490.63	-0.429625	0.200952	-2.13795	0.0325207	0.205909	19.3297	16.5718	20.3337	22.7609	27.9682	17.3211
Abca4	41.0446	0.276218	0.878965	0.314254	0.753328	0.933469	0.452977	0.871021	0.31907	0.641952	0.460553	0.280603
Abca5	803.331	-0.971312	0.267055	-3.63712	0.000275701	0.00711154	7.80385	5.37285	5.57574	11.601	14.994	7.07548
Abca6	6.14633	-1.40547	2.35179	-0.597618	0.550095	NA	0.189718	0.1016	0.0355791	0.741103	0.0156263	0
Abca7	659.525	0.0417611	0.254194	0.164288	0.869504	0.967905	11.6496	8.16459	9.26676	10.1006	9.83558	6.98316
Abca8a	30.417	0.367422	0.988472	0.371708	0.710111	0.919668	0.462622	0.614473	0.706175	0.446097	0.407027	0.258164
Abca8b	39.9195	0.27531	0.863735	0.318744	0.749921	0.931817	0.755043	0.488632	0.357867	0.730501	0.360694	0.229347
Abca9	2.4823	-4.63536	3.70114	-1.25241	0.210419	NA	0	0	0.0298955	0.0782343	0.0788501	0.0297333
Abcb10	596.346	-0.294571	0.25511	-1.15468	0.24822	0.618296	11.7631	12.0584	13.3643	14.3373	16.446	12.1447
Abcb11	17.4071	-1.58647	1.29353	-1.22646	0.220024	0.586535	0.31659	0.123285	0.0775661	1.0158	0.376076	0.103214
Abcb1a	5.97405	-1.18249	2.14176	-0.552114	0.58087	NA	0.181642	0.0276471	0.0479754	0.232046	0.114178	0.0444829
Abcb1b	127.105	-0.194629	0.507375	-0.383599	0.701276	0.917772	3.72076	1.99467	2.12999	5.21479	2.00659	1.82534
Abcb4	13.0479	1.13673	1.48921	0.763309	0.445279	NA	0.681303	0.25059	0.275069	0.194122	0.224786	0.253123
Abcb5	NA	NA	NA	NA	NA	NA	0	0	0	0	0	0.0337881
Abcb6	3373.16	0.416912	0.168812	2.46968	0.0135232	0.120458	158.198	106.539	102.009	104.625	100.634	80.2494
Abcb7	1140.43	0.0615836	0.200961	0.306445	0.759266	0.935569	15.9406	19.8512	17.0877	15.6116	20.0288	16.352
Abcb8	1417.75	0.0670536	0.189353	0.354119	0.72325	0.924163	55.6557	45.407	43.5271	51.9372	49.5257	43.0316
Abcb9	102.713	-0.0196034	0.583502	-0.0335961	0.973199	0.99297	2.49588	2.40402	3.03676	1.78872	3.82994	4.47925
Abcc1	2664.45	-0.157915	0.16123	-0.979442	0.327362	0.698717	45.8729	35.5306	39.1597	49.8111	44.5751	28.6377
Abcc10	298.22	0.117816	0.340142	0.346374	0.729062	0.925705	5.35316	6.10143	6.15838	4.96414	6.26062	5.39863
Abcc12	16.6497	2.69045	1.59639	1.68533	0.0919253	NA	0.206331	0.707317	0.709428	0	0.341755	0.0862181
Abcc2	5.31295	1.43959	2.71145	0.530931	0.595466	NA	0.0844654	0.0223462	0	0	0.0776829	0.316749
Abcc3	74.536	-0.169409	0.647949	-0.261454	0.793742	0.942395	1.13764	1.27246	1.79806	1.48315	1.31589	1.21295
Abcc4	1944.05	0.0946777	0.17105	0.553509	0.579915	0.866568	36.5041	31.4433	37.4782	35.2389	31.1082	17.4054
Abcc5	1556.03	-0.274696	0.190606	-1.44117	0.149536	0.48782	31.8387	20.4307	30.2133	36.1702	31.12	17.4213
Abcc6	11.6596	0.0562071	1.52691	0.0368109	0.970636	NA	0.339364	0.197207	0.098184	0.32994	0.208696	0.158015
Abcc8	1839.1	-0.257171	0.177582	-1.44818	0.147568	0.485083	40.9027	27.9377	34.3965	47.086	38.3479	21.7541
Abcc9	14.2092	0.634367	1.45285	0.436635	0.662376	NA	0.207726	0.170427	0.210761	0.281432	0.0578219	0.106485
Abcd1	156.671	-0.68351	0.503427	-1.35771	0.174555	0.529093	3.87069	2.27312	3.87992	3.99571	6.34398	3.66524
Abcd2	507.432	0.889839	0.274048	3.24701	0.00116622	0.0216797	16.7103	8.08872	6.73627	8.5766	4.97524	3.74747
Abcd3	848.484	-0.666708	0.260445	-2.55988	0.0104709	0.101304	21.0193	15.1252	16.8689	25.5477	34.3282	24.7427
Abcd4	173.88	-0.741361	0.446899	-1.6589	0.0971355	0.391077	8.65554	3.75027	4.74002	12.1368	8.42589	5.54916
Abce1	4776.68	-0.440289	0.14897	-2.95556	0.00312103	0.0435827	86.5865	107.375	121.304	110.702	168.061	112.712
Abcf1	4654.72	0.0577721	0.142473	0.405497	0.685113	0.909636	158.531	145.514	137.433	154.801	152.359	132.044
Abcf2	11381.2	-0.141327	0.129959	-1.08748	0.276826	0.648066	384.621	386.367	448.731	420.886	480.648	403.238
Abcf3	2426.02	0.201172	0.162142	1.24071	0.214712	0.580294	75.5304	74.9178	73.0818	67.0302	70.4642	66.9434
Abcg1	491.753	-0.0507981	0.276303	-0.183849	0.854132	0.962051	7.79237	6.78312	6.73531	7.90346	7.87647	8.96668
Abcg2	857.024	-0.578209	0.223767	-2.58398	0.00976668	0.0972467	29.2074	29.0022	34.449	48.1097	43.0809	45.1062
Abcg3	NA	NA	NA	NA	NA	NA	0	0.040934	0.0965944	0.0337057	0	0
Abcg4	54.2041	-0.96022	0.817988	-1.17388	0.240443	0.609583	1.30945	0.504429	1.04339	1.31734	2.17732	1.93017
Abcg5	0.784883	3.26198	4.85814	0.671446	0.501936	NA	0.0430368	0.11307	0.0448357	0	0	0
Abcg8	2.34352	1.4427	3.54891	0.406519	0.684361	NA	0.0318503	0.083718	0.132856	0.104339	0	0.0887488
Abhd1	31.4396	-0.667977	0.968624	-0.689615	0.490437	0.81699	2.95014	1.96363	2.4601	4.86351	3.14754	1.55698
Abhd10	1927.89	-0.326837	0.173935	-1.87908	0.0602334	0.301696	121.022	113.29	132.471	150.843	160.36	160.048
Abhd11	1513.33	0.402151	0.188402	2.13454	0.0327985	0.206696	214.988	161.331	163.568	186.944	130.481	135.619
Abhd11os	4.55093	-1.74758	2.52018	-0.693436	0.488036	NA	3.5328	0.888262	0	6.31512	10.2481	2.30281
Abhd12	1316.84	-0.0390046	0.192682	-0.202429	0.839581	0.958708	70.3166	66.9227	65.7101	72.3025	73.0877	74.1094
Abhd12b	8.25103	-0.0299151	1.8404	-0.0162547	0.987031	NA	0.853725	0.956447	0.381812	1.99787	0.471126	1.38037
Abhd13	1378.85	-0.21751	0.18977	-1.14617	0.251724	0.622316	21.3486	22.8218	23.2767	24.9422	28.6314	22.4054
Abhd14a	468.979	0.593612	0.283447	2.09426	0.0362368	0.219478	75.109	48.3273	55.7172	55.0756	33.1664	37.6273
Abhd14b	28.5304	0.136046	1.02091	0.133259	0.893989	0.974691	3.52122	1.42921	2.78028	2.8309	1.70663	1.32175
Abhd15	37.1119	-0.453796	0.904833	-0.501525	0.616002	0.883512	0.888152	0.802342	1.57365	1.07064	1.3888	1.09494
Abhd16a	2061.67	0.37776	0.184849	2.04361	0.0409917	0.237147	167.581	104.172	111.678	113.982	103.131	91.8265
Abhd16b	43.7561	2.75798	0.901021	3.06094	0.0022064	0.0341588	5.40414	3.09463	6.09985	1.29186	0.277732	0.26223
Abhd17a	2047.62	-0.0791519	0.169229	-0.467721	0.639984	0.893281	153.379	154.186	147.071	166.606	183.597	213.299
Abhd17b	411.417	-0.139513	0.298921	-0.466722	0.640699	0.893281	17.6208	15.4761	19.8163	18.2757	19.7389	10.5305
Abhd17c	1285.83	0.239937	0.210351	1.14065	0.254016	0.624889	45.6061	88.5024	86.513	47.823	67.6162	34.1765
Abhd18	118.409	-0.920542	0.534256	-1.72304	0.0848821	0.367723	4.72346	2.53369	3.88123	7.20336	6.67523	3.74301
Abhd2	271.518	-0.586913	0.356209	-1.64766	0.0994217	0.3966	6.28337	7.89264	9.02068	10.476	11.7596	8.95823
Abhd3	329.388	-0.169647	0.33682	-0.503671	0.614492	0.882715	25.6584	13.9716	13.3607	24.7634	20.5651	15.1684
Abhd4	1579.84	-0.335694	0.184934	-1.81521	0.0694917	0.327324	55.2292	50.5745	59.2687	77.2414	64.8506	60.2544
Abhd5	1379.8	0.0402468	0.189099	0.212835	0.831456	0.955669	42.6113	42.1166	41.9957	43.1579	42.9291	43.2553
Abhd6	626.193	-0.269389	0.251934	-1.06928	0.284943	0.655456	32.1469	20.9215	21.9091	37.6673	28.759	30.4129
Abhd8	188.157	0.9865	0.431053	2.28858	0.0221037	0.163826	16.655	14.6119	10.6971	10.8779	6.38936	7.01598
Abi1	2398.29	-0.280273	0.16555	-1.69298	0.0904585	0.378811	54.3515	61.7407	63.3265	64.4009	84.287	66.1122
Abi2	1119.88	-0.185362	0.20463	-0.905844	0.365019	0.731792	16.5457	18.6081	14.2718	18.0682	23.6405	13.9258
Abi3	49.0869	-0.423916	0.78612	-0.539252	0.589713	0.871488	0.991579	1.08992	0.496212	1.29664	1.47663	1.81749
Abi3bp	25.4537	0.459253	1.0627	0.432158	0.665626	0.901919	0.760943	0.835083	0.226015	0.712851	0.489667	0.267798
Abl1	1292.68	0.108158	0.197352	0.548043	0.583662	0.869012	18.8589	16.1566	18.0126	16.1306	16.9804	12.8903
Abl2	928.476	-0.0150926	0.21625	-0.0697925	0.944359	0.987471	9.94362	6.81822	6.46927	9.98278	7.63611	6.15466
Ablim1	251.746	-0.35625	0.400257	-0.890053	0.373438	0.738766	4.74631	2.074	2.1147	4.41792	3.87912	2.95886
Ablim2	122.947	0.144651	0.523199	0.276473	0.782185	0.939341	2.70596	3.60265	3.412	2.00105	4.35709	3.51627
Ablim3	131.256	0.654236	0.493874	1.3247	0.18527	0.542981	4.11263	2.68381	3.69448	2.74527	1.84219	1.89439
Abo	16.0811	-0.465765	1.3576	-0.343079	0.731539	NA	0.386341	1.21625	1.01156	0.81905	1.1372	1.04667
Abr	1174.48	-0.75863	0.22368	-3.39159	0.000694886	0.0144668	17.0813	14.8666	17.69	23.3091	33.8735	19.9789
Abra	NA	NA	NA	NA	NA	NA	0	0	0	0.338665	0	0.0435409
Abracl	107.209	-0.773052	0.551964	-1.40055	0.16135	0.505189	15.8026	16.1999	17.6701	35.2142	25.1623	25.1738
Abraxas1	1531.57	-0.0868383	0.184995	-0.469409	0.638778	0.893281	65.2562	55.7134	56.7174	68.1048	66.1869	51.6098
Abraxas2	1681.97	-0.250371	0.183992	-1.36077	0.173586	0.527572	47.6743	51.6513	59.7672	53.5843	71.6728	52.2015
Abt1	1461.92	0.137052	0.18976	0.722239	0.470147	0.804673	34.238	28.3042	28.6913	29.7086	29.3769	26.9644
Abtb1	1991.31	0.395324	0.174435	2.26631	0.0234325	0.169107	150.624	118.978	112.592	110.067	105.735	95.6605
Abtb2	541.74	-0.573637	0.270906	-2.11748	0.0342194	0.212398	7.7881	9.33009	10.1783	10.6498	16.6882	12.9079
Acaa1a	1070.88	0.276513	0.206846	1.33681	0.181286	0.537401	85.7032	69.9163	70.6507	77.8037	59.6202	61.7182
Acaa1b	944.877	0.903995	0.246849	3.66214	0.000250121	0.00661748	128.22	58.5127	62.0086	54.4478	45.0093	52.7118
Acaa2	1616.8	-0.122392	0.181249	-0.675267	0.499506	0.82239	163.356	97.9162	102.475	177.464	121.523	113.837
Acaca	1781.34	0.107447	0.190304	0.564604	0.572343	0.862615	25.0512	13.9529	17.5209	20.6057	15.912	9.52529
Acacb	285.8	0.188643	0.360137	0.523807	0.600413	0.875545	4.30874	2.43552	3.6069	3.16521	2.82455	1.93878
Acad10	412.008	0.403879	0.298878	1.35132	0.176595	0.532226	14.0233	13.1972	8.6602	12.2564	9.57255	7.77829
Acad11	767.361	-0.141152	0.234765	-0.601251	0.547673	0.848069	21.1118	20.5527	21.5741	22.0676	26.2617	20.2011
Acad12	631.825	0.0961134	0.261524	0.367513	0.713236	0.920337	32.867	25.682	26.4423	26.7975	30.8068	23.2471
Acad8	538.759	-0.315914	0.265561	-1.18961	0.2342	0.602353	17.2741	14.4816	15.874	21.4757	19.8434	20.0276
Acad9	2217.14	-0.132481	0.167034	-0.793138	0.427698	0.776114	49.6566	52.0538	50.7319	59.0916	57.4827	48.0601
Acadl	570.503	0.150748	0.258262	0.583704	0.55942	0.855083	37.515	32.8132	29.5441	35.1742	31.3822	27.7613
Acadm	2015.47	0.142763	0.185119	0.771199	0.440589	0.785153	124.932	104.456	104.034	100.727	118.786	97.8182
Acads	530.704	0.182112	0.267262	0.6814	0.495619	0.819541	35.2367	32.2058	31.2611	33.9542	29.5053	33.1202
Acadsb	619.823	-0.241464	0.258185	-0.935239	0.349665	0.719166	17.8897	16.3492	15.4421	19.091	23.2452	14.6937
Acadvl	3485.68	-0.164117	0.151107	-1.0861	0.277436	0.648169	116.839	180.143	184.783	140.672	211.026	184.623
Acan	181.047	-0.143027	0.429328	-0.333142	0.739027	0.928639	1.54171	1.99323	2.56549	1.58403	2.56706	2.09241
Acap1	48.7753	-1.9493	0.848288	-2.29792	0.0215665	0.161705	1.46274	0.490862	0.695861	3.50784	3.59592	2.53781
Acap2	1293.76	-0.722444	0.198986	-3.63063	0.000282725	0.00723314	16.4702	13.8385	14.6225	25.3478	26.4904	13.6125
Acap3	2765.77	-0.161679	0.1595	-1.01366	0.310744	0.682477	54.0343	63.937	64.2223	66.1408	72.3418	49.9852
Acat1	3511	-0.268793	0.151043	-1.77958	0.0751448	0.342041	88.0268	90.3763	88.0664	105.275	119.927	108.504
Acat2	2534.47	0.165661	0.16092	1.02946	0.303263	0.6762	122.132	144.698	144.718	116.279	134.51	114.871
Acat3	112.85	0.0742715	0.531992	0.13961	0.888968	0.972744	4.94649	7.07224	7.26681	5.46546	6.4658	4.86092
Acbd3	2973.76	-0.0470482	0.157748	-0.298249	0.765513	0.936164	78.4657	84.1479	88.5105	78.4962	97.6778	59.1482
Acbd4	25.9062	-1.323	1.07545	-1.23018	0.218629	0.58486	0.623502	0.88162	1.03248	1.82173	2.13702	1.61325
Acbd5	1136.37	-0.589528	0.201485	-2.92591	0.00343445	0.0465978	23.3274	25.1494	28.3787	35.7569	40.2954	24.0138
Acbd6	975.807	0.304957	0.219324	1.39044	0.164394	0.510194	114.85	121.371	100.917	112.14	98.8217	119.993
Acbd7	27.7665	-0.616139	1.10868	-0.555742	0.578387	0.865444	5.61655	19.7221	18.4119	22.9404	18.7973	25.9191
Accs	53.3711	-0.91171	0.757876	-1.20298	0.228983	0.595823	0.837923	0.96273	0.775925	1.47129	2.10425	1.31299
Accsl	4.9495	-1.22045	2.32088	-0.525854	0.59899	NA	0.230517	0.0854875	0.203575	0.354786	0.258056	0.308133
Acd	1386.64	-0.0784308	0.190898	-0.410852	0.681181	0.908183	89.0271	108.644	93.2871	104.032	118.435	111.898
Ace	406.344	0.121916	0.33822	0.360465	0.7185	0.922629	12.8462	7.10017	12.9054	7.33259	7.83798	7.5822
Ace2	18.8354	-0.575056	1.23912	-0.464083	0.642588	0.893281	0.4126	0.400961	0.689786	0.48849	0.786337	0.30527
Ace3	11.1946	2.17004	1.9182	1.13129	0.257934	NA	0.0912439	1.79655	0.904348	0.199327	0.0424774	0
Acer1	31.2835	0.787414	0.980838	0.802798	0.422092	0.772683	1.54978	1.27245	1.20424	1.08301	0.66113	1.58743
Acer2	202.396	0.0109079	0.413105	0.0264047	0.978935	0.994504	13.1859	8.7177	11.5612	12.0804	10.9415	9.06775
Acer3	679.687	-0.130457	0.247432	-0.527245	0.598024	0.874489	14.3195	14.9822	13.8248	14.5176	19.0545	18.6452
Ache	5.49723	-0.952804	2.22612	-0.428012	0.668643	NA	0.376529	0.0613268	0.0490371	0.358897	0.307833	0.396245
Acin1	1630.06	0.0596458	0.179789	0.331755	0.740075	0.929001	35.6823	30.1089	28.5934	35.0635	30.8624	30.4448
Ackr1	NA	NA	NA	NA	NA	NA	0.219443	0	0	0	0	0.0779941
Ackr2	9.77953	-2.81881	2.01415	-1.3995	0.161662	NA	0	0.259348	0.37652	0.179392	0.726053	0.328706
Ackr3	25.5204	-0.274434	1.13479	-0.241838	0.808906	0.948292	2.03498	0.335225	1.16975	1.33511	0.853356	1.59902
Ackr4	21.3955	1.42396	1.17556	1.21131	0.225777	0.592549	2.18067	1.31771	0.998753	0.603514	0.744937	0.593129
Acly	18920.7	0.186262	0.123683	1.50596	0.132078	0.457638	376.188	445.219	526.058	341.333	414.858	277.942
Acmsd	31.9106	-0.00918591	0.964134	-0.00952762	0.992398	0.997549	1.24245	1.44032	1.83341	1.3544	1.45198	1.22711
Acnat1	143.207	1.0435	0.484532	2.15363	0.0312692	0.201691	4.47265	3.15565	2.53216	2.75745	1.28392	1.2385
Acnat2	NA	NA	NA	NA	NA	NA	0	0.179204	0	0.0741963	0	0
Aco1	1945.02	-0.647358	0.183846	-3.52119	0.000429614	0.00989915	35.5101	29.0115	45.6254	50.0615	55.5088	38.7896
Aco2	5869.46	-0.176582	0.137491	-1.28431	0.199032	0.562586	163.038	212.669	208.141	192.149	256.662	222.961
Acod1	NA	NA	NA	NA	NA	NA	0.116142	0	0	0	0	0
Acot1	235.56	-1.30016	0.383363	-3.39146	0.000695221	0.0144668	11.7723	9.33941	9.82534	27.5694	27.6052	25.8815
Acot10	3.87495	-3.77023	3.16416	-1.19155	0.233439	NA	0	0	0.986845	0.260378	0.21127	0.248186
Acot11	213.492	-0.685415	0.395687	-1.73222	0.0832348	0.363564	2.37553	2.6897	3.34774	3.78083	4.80278	3.20576
Acot12	2.29037	3.13623	3.77247	0.831345	0.405779	NA	0.0635179	0.210293	0.132476	0	0.0292384	0
Acot13	760.13	-0.113508	0.233879	-0.485327	0.627444	0.888655	258.865	180.343	158.373	312.142	224.055	261.876
Acot2	42.1432	-0.426538	0.853531	-0.499733	0.617263	0.883512	2.2712	1.4364	1.76692	2.46976	2.63872	2.47372
Acot3	83.1242	-0.421596	0.61649	-0.683866	0.49406	0.818836	2.48078	3.33034	3.39675	3.97613	3.97427	2.88399
Acot4	27.9527	-0.448068	1.04233	-0.429873	0.667288	0.902661	1.02322	1.38858	0.751592	2.267	1.2908	1.06549
Acot5	15.876	0.418618	1.37261	0.304979	0.760383	NA	0.995143	1.72672	0.961573	1.57713	0.65851	1.84136
Acot6	28.986	0.340708	1.00686	0.338388	0.73507	0.927508	2.15114	2.30059	1.20928	1.46956	2.27348	1.81122
Acot7	1351.57	0.787664	0.190705	4.13027	3.6233e-05	0.00146275	126.914	128.099	137.332	76.6849	81.351	94.9353
Acot8	195.347	0.14442	0.415232	0.347806	0.727986	0.925317	26.7554	19.7892	25.1651	26.4968	18.4804	24.4435
Acot9	3284.94	0.218654	0.152602	1.43284	0.151903	0.491321	231.971	187.384	203.281	198.502	178.881	186.364
Acox1	1272.13	-0.516178	0.216114	-2.38844	0.0169198	0.140439	18.2567	30.5238	28.1447	33.2129	37.7892	34.0279
Acox2	NA	NA	NA	NA	NA	NA	0	0	0	0	0	0
Acox3	216.874	0.0859373	0.393193	0.218563	0.826991	0.953828	5.86357	5.76224	5.98591	6.15385	5.39427	4.51925
Acoxl	14.9731	-1.21318	1.43365	-0.846221	0.39743	NA	0.105497	0.415988	0.47665	0.384334	0.717378	0.981355
Acp1	659.382	-0.156203	0.251841	-0.620242	0.535098	0.842331	13.9467	22.0808	18.552	18.2847	22.8736	23.227
Acp2	578.687	-0.655158	0.271107	-2.4166	0.0156661	0.132995	8.94093	7.38924	9.93743	12.237	14.646	12.3885
Acp4	3.43622	-1.83438	3.20761	-0.571883	0.567401	NA	0	0.50599	0.713087	0.639355	0.186388	0
Acp5	314.18	0.583963	0.334651	1.74499	0.0809864	0.359076	35.4706	30.6436	30.7972	27.2085	20.3114	22.9543
Acp6	2150.77	0.322464	0.168688	1.9116	0.0559278	0.288318	175.076	133.494	142.487	138.309	123.376	117.171
Acp7	12.1107	-3.647	1.68158	-2.16879	0.0300984	NA	0.0574809	0.225382	0.360593	1.76033	1.51174	0.40271
Acpp	135.975	-0.459179	0.486469	-0.943902	0.34522	0.714718	3.6259	2.08216	1.74178	4.41944	3.24435	2.56751
Acr	43.9261	1.29519	1.00488	1.28891	0.197431	0.559916	0.985612	8.06615	7.09194	1.61546	0.976587	0.312106
Acrbp	208.49	0.473571	0.423854	1.1173	0.263867	0.633829	12.3611	23.9042	29.1584	13.1154	13.2546	14.3514
Acrv1	33.984	1.15589	1.20379	0.960214	0.336948	0.708015	0.234482	8.88345	11.8438	0.770005	1.01807	0.999005
Acsbg1	240.058	-0.743819	0.500072	-1.48742	0.136903	0.466566	4.58891	8.34209	9.32974	17.7127	6.73951	5.92475
Acsbg2	133.444	3.55691	0.57488	6.18722	6.12345e-10	8.17342e-08	11.9592	5.17569	11.7084	0.638816	0.789111	0.540841
Acsf2	293.461	-0.50468	0.346299	-1.45735	0.145018	0.480455	8.64644	6.32343	7.53368	11.5163	10.5891	10.9308
Acsf3	99.6842	-0.880634	0.566183	-1.55539	0.119854	0.436411	2.88703	2.98029	4.57538	5.80042	5.67139	5.89497
Acsl1	2471.79	0.56779	0.19093	2.97382	0.0029412	0.0419412	71.7024	65.741	84.0142	40	58.898	44.0376
Acsl3	4826.05	0.100574	0.157582	0.638232	0.523323	0.83466	117.277	124.046	138.922	97.9248	141.206	87.4339
Acsl4	595.356	-0.52214	0.261147	-1.99941	0.0455641	0.254171	8.93029	9.41207	8.10448	11.8686	15.7512	8.43066
Acsl5	119.084	-0.161989	0.516198	-0.313811	0.753664	0.933533	3.55828	3.62281	3.05312	4.42823	4.00954	3.60014
Acsl6	25.0351	2.39176	1.26605	1.88916	0.0588705	0.297239	1.0313	1.94352	1.15339	0.0433599	1.10204	0.526758
Acsm1	NA	NA	NA	NA	NA	NA	0.0502573	0	0	0	0	0
Acsm2	13.2813	-2.94157	1.75144	-1.67952	0.0930509	NA	0.190817	0	0.128968	0.425752	0.225181	0.133218
Acsm3	15.5917	-0.649459	1.35604	-0.478938	0.631983	NA	0.375108	0.552145	0.483248	0.44637	1.19529	0.476411
Acsm4	NA	NA	NA	NA	NA	NA	0	0	0.298721	0	0	0.0662931
Acsm5	NA	NA	NA	NA	NA	NA	0	0	0	0.0873062	0	0
Acss1	338.554	-1.84175	0.92339	-1.99455	0.0460917	0.255877	6.50566	2.05626	6.01971	11.3052	17.0181	10.3852
Acss2	2309.43	-0.507411	0.164632	-3.08209	0.0020555	0.0325873	56.1846	68.5442	77.4547	80.7763	106.118	82.3795
Acss2os	2.83249	-1.89647	3.24088	-0.585171	0.558433	NA	0	2.38393	0.493479	1.46603	1.47616	0.650838
Acss3	13.2499	-3.46553	1.62589	-2.13147	0.0330503	NA	0.047561	0.188256	0.347812	0.778891	1.68587	0.74829
Acta1	257.454	-0.334678	0.367895	-0.909711	0.362975	0.731151	14.0503	16.2841	17.0793	16.2717	25.3442	23.6116
Acta2	128.496	-1.17717	0.69118	-1.70314	0.0885424	0.374496	4.47157	0.560255	0.722304	24.741	0.391571	0.16041
Actb	11247.5	-0.479737	0.132566	-3.61885	0.000295916	0.00746899	436.758	582.34	597.797	676.411	823.721	781.353
Actbl2	NA	NA	NA	NA	NA	NA	0	0	0	0	0	0
Actc1	NA	NA	NA	NA	NA	NA	0.0762496	0.100243	0	0	0	0.0536792
Actg1	12019.6	0.461918	0.128716	3.58867	0.000332375	0.00816661	653.879	811.19	824.167	511.482	612.072	559.564
Actg2	82.8459	1.93514	0.673994	2.87115	0.00408978	0.0529207	10.7715	9.189	17.2637	4.82579	1.52746	1.45462
Actl10	4.74607	1.66779	2.54846	0.654429	0.512836	NA	0.0797566	0.623376	1.08953	0.0876807	0.0755558	0.282019
Actl11	206.241	4.91018	0.502909	9.76357	1.61378e-22	1.08681e-19	9.21169	5.98204	12.4751	0.336862	0.188026	0.142401
Actl6a	3957.15	-0.12819	0.147806	-0.867287	0.385785	0.746923	188.128	204.252	208.858	204.458	251.903	217.867
Actl6b	12.769	-1.14577	1.51136	-0.758106	0.448387	NA	0.885019	0.384586	0.538267	1.1251	1.73854	1.03738
Actl7a	57.6797	2.5526	0.828294	3.08176	0.00205781	0.0325873	2.79436	8.17534	11.793	1.02241	0.742688	0.252185
Actl7b	41.9166	3.49044	0.983257	3.54988	0.000385404	0.00913622	2.2506	7.38716	9.86659	0.18235	0.785303	0.354475
Actl9	30.4667	3.26159	1.08416	3.0084	0.00262627	0.0390161	4.66783	3.34794	6.56862	0.699639	0.241058	0.059823
Actn1	241.658	-0.0782189	0.384726	-0.203311	0.838892	0.958216	8.55944	4.40059	5.23194	7.66138	6.07813	6.36768
Actn2	1065.51	0.619577	0.221021	2.80325	0.0050591	0.0618975	69.4416	35.0246	28.0904	39.3372	29.1611	14.8704
Actn3	525.575	0.412177	0.269421	1.52986	0.12605	0.447428	25.9779	18.1536	18.8026	18.7336	15.8154	13.5495
Actn4	4710.4	-0.511703	0.149961	-3.41224	0.000644316	0.0136765	112.171	86.3474	97.5969	149.996	145.269	111.639
Actr10	6955.13	0.125499	0.144585	0.867995	0.385397	0.746606	158.015	164.706	161.452	167.358	141.684	162.449
Actr1a	1703.57	-0.323193	0.181719	-1.77853	0.0753169	0.342299	50.8027	52.4269	55.215	60.9964	75.8999	64.7208
Actr1b	1860.17	-0.0328671	0.176777	-0.185924	0.852504	0.961506	87.5915	87.7513	94.1014	99.8933	90.645	93.7314
Actr2	1683.08	-0.213511	0.178296	-1.19751	0.231108	0.598305	39.3609	40.6445	40.3446	47.0526	49.7607	46.126
Actr3	6082.99	-0.350986	0.138337	-2.53719	0.0111748	0.105688	163.963	222.048	222.292	208.319	311.434	255.884
Actr3b	933.804	-0.245476	0.215307	-1.14012	0.254235	0.624889	42.0466	39.708	39.3458	52.7542	49.5793	44.0621
Actr5	959.699	0.26248	0.212656	1.23429	0.217094	0.583856	47.2496	50.2254	49.8073	40.7874	45.2045	28.1084
Actr6	1468.6	0.345309	0.19521	1.76892	0.076908	0.347399	96.7281	99.4757	112.44	69.093	93.849	83.0307
Actr8	1689.56	-0.160145	0.18008	-0.889298	0.373843	0.738876	75.884	77.2284	84.0446	83.207	98.1534	84.9488
Actrt1	16.3158	2.8192	1.39308	2.02371	0.0429995	NA	2.62624	1.86497	3.01655	0.462669	0.2393	0.118283
Actrt2	284.437	3.31049	0.466307	7.09937	1.25325e-12	2.81335e-10	37.8931	29.8385	61.5047	7.08167	1.69553	1.03472
Actrt3	15.047	1.44952	1.64279	0.882353	0.377586	NA	0.418877	1.10715	2.72876	0.868967	0.0763071	0
Acvr1	59.5656	1.12645	0.742591	1.51692	0.129287	0.453162	2.66743	2.22575	3.00376	1.88212	0.700743	1.27225
Acvr1b	103.96	-0.171273	0.556593	-0.307717	0.758298	0.935154	2.56657	1.57846	1.51227	2.53665	2.2548	2.62886
Acvr1c	3.97568	-0.0557463	2.58037	-0.021604	0.982764	NA	0.0302371	0.0269473	0.021258	0.0849267	0.00935084	0.0647196
Acvr2a	714.574	-0.530228	0.24442	-2.16933	0.0300575	0.197486	8.77665	9.73616	11.3681	11.6003	16.459	9.98026
Acvr2b	1543.29	0.414706	0.191632	2.16408	0.0304581	0.199059	14.9121	15.021	15.4966	13.0978	10.4757	8.91027
Acvrl1	8.76456	1.0349	1.76866	0.585129	0.558461	NA	0.162382	0.587532	0.0848377	0.118491	0.224917	0.207988
Acy1	907.042	0.286967	0.217718	1.31807	0.187481	0.546471	84.2206	71.7182	81.0521	69.8752	66.3561	69.7085
Acy3	256.827	-0.328703	0.373607	-0.879808	0.378963	0.741716	29.285	17.1853	17.623	35.0764	28.3286	27.5559
Acyp1	209.796	0.0339644	0.423632	0.0801743	0.936099	0.985833	52.895	63.2226	57.6034	73.4598	57.1181	68.8172
Acyp2	6.9638	0.0764219	1.98292	0.03854	0.969257	NA	1.2527	2.83038	1.99964	3.10507	1.32054	2.79141
Ada	97.6425	0.353314	0.576306	0.613068	0.539831	0.843775	12.3318	3.6509	5.55862	8.37301	3.76415	4.73328
Adad1	1310.63	0.128304	0.19606	0.654411	0.512847	0.830293	84.3853	68.9903	75.3232	73.5763	73.4331	51.6564
Adad2	965.428	0.17159	0.212489	0.807524	0.419365	0.772031	73.8273	48.7667	41.9893	68.8937	46.8807	54.177
Adal	1414.3	-0.0214948	0.192926	-0.111414	0.911288	0.980013	55.6882	65.7964	50.3196	64.5913	64.5971	50.35
Adam10	1576.78	-0.564252	0.18865	-2.991	0.00278066	0.040411	23.7457	28.0265	31.2104	32.7027	48.2207	26.3481
Adam11	76.0442	-0.817286	0.672801	-1.21475	0.22446	0.591795	0.952681	0.853784	1.40067	1.11842	2.35903	1.66816
Adam12	85.381	-1.1608	0.610507	-1.90138	0.0572526	0.292388	0.617804	0.579311	0.780553	1.59666	1.22388	1.09296
Adam15	1425.76	-0.320693	0.189212	-1.69489	0.0900956	0.377932	30.3888	49.6297	53.6668	41.1892	63.9298	52.2745
Adam17	2090.29	-0.611665	0.183522	-3.33292	0.00085941	0.0171373	32.3178	34.9953	42.2845	43.9033	65.7906	39.2754
Adam18	29.2657	2.03821	1.16762	1.74561	0.0808789	0.359076	0.491228	3.25802	3.27932	0.439461	0.248558	0.0310717
Adam19	37.8633	0.846818	0.929334	0.91121	0.362185	0.730683	1.25105	0.497547	0.516784	0.389638	0.569293	0.216321
Adam1a	146.696	2.25646	0.526961	4.28202	1.85202e-05	0.000831502	6.00642	6.58614	10.6466	2.09885	0.882519	0.30877
Adam1b	36.9998	1.63688	1.08517	1.50841	0.131451	0.456747	0.260185	3.55452	2.67133	0.366141	0.34746	0.144994
Adam2	86.2766	0.96792	0.624528	1.54984	0.121179	0.438903	2.21668	4.94478	8.48816	1.58478	2.01283	0.585163
Adam20	5.27514	1.63363	2.97603	0.548931	0.583053	NA	0	0.257453	0.8974	0	0.0452916	0
Adam21	20.8281	1.93487	1.25244	1.54488	0.122375	0.440224	1.26931	0.504449	1.78883	0.27758	0.175168	0
Adam22	339.077	-0.192737	0.364831	-0.528293	0.597296	0.873684	4.92323	2.68684	3.01979	3.98603	3.97569	2.62999
Adam23	265.669	0.0272437	0.364685	0.0747049	0.94045	0.986707	5.20908	3.33451	3.36615	4.48682	4.06568	2.75283
Adam24	25.9421	2.51499	1.30206	1.93154	0.0534157	0.280045	0.227317	1.51594	2.94562	0.177394	0.0598322	0.112251
Adam25	6.58401	3.82443	2.43595	1.57	0.116416	NA	0.307252	0.66224	0.294592	0	0.130863	0
Adam26a	6.63143	-0.357708	2.48162	-0.144143	0.885388	NA	0	0.598199	0.686437	0.166482	0.0873797	0
Adam26b	2.7938	1.04582	3.47626	0.300847	0.763531	NA	0.0403076	0.172977	0.298571	0	0.16785	0
Adam28	24.4028	0.440129	1.12878	0.389917	0.696598	0.915573	0.459544	0.855757	0.67983	0.670127	0.353437	0.497149
Adam29	17.2677	3.20066	1.42601	2.24448	0.0248015	0.174648	0.80995	0.991694	1.5113	0.110218	0.093059	0
Adam3	321.018	2.51047	0.415071	6.04829	1.46388e-09	1.8226e-07	12.6806	18.364	31.2036	4.03385	1.91829	0.798277
Adam30	45.0308	1.83239	0.95529	1.91815	0.0550924	0.285302	0.461428	2.68748	2.05708	0.398976	0.282153	0.922455
Adam32	152.58	1.6072	0.475795	3.37792	0.000730359	0.0150501	5.37068	9.03465	17.4202	1.60673	3.47632	0.877832
Adam33	10.4187	-3.04372	1.93956	-1.56928	0.116582	NA	0.355069	0	0.033609	0.670044	0.637379	0.338871
Adam34	4.05553	1.58996	3.74277	0.424809	0.670976	NA	0	0.0514648	0.903559	0	0	0
Adam39	4.81715	0.379365	2.91822	0.129999	0.896567	NA	0	0.355836	0.360547	0.260627	0	0.148697
Adam4	9.92415	5.23914	2.4326	2.15372	0.0312619	NA	0.0474099	1.02446	1.14934	0	0	0
Adam5	315.474	2.361	0.39954	5.90928	3.43604e-09	3.91603e-07	12.4679	16.4669	29.3551	4.10925	2.0586	0.584548
Adam6a	19.2889	1.09994	1.39221	0.790066	0.429489	0.776935	0.250163	1.31511	1.95909	0.505035	0.142356	0.265892
Adam6b	10.784	5.48342	2.2651	2.42083	0.0154852	NA	0.151077	0.647263	1.58994	0	0	0.360373
Adam7	2.44575	-1.04292	3.48531	-0.299232	0.764763	NA	0.0536234	0	0.22358	0.0292539	0.0492312	0.0370984
Adam8	7.84832	0.124422	1.96237	0.0634039	0.949445	NA	0.121736	0.199796	0.253949	0.0332488	0.535055	0.276525
Adam9	595.318	-0.17923	0.278636	-0.643242	0.520067	0.833637	19.2983	10.5948	11.5235	17.5766	16.3056	8.96906
Adamdec1	NA	NA	NA	NA	NA	NA	0	0	0	0	0	0
Adamts1	56.3049	-1.25642	0.738048	-1.70236	0.0886887	0.374897	0.693688	0.717109	0.273593	1.82213	1.70443	1.14434
Adamts10	258.095	-1.18074	0.36528	-3.23242	0.00122746	0.0225075	4.84644	3.19402	3.32605	10.4652	8.39974	4.86403
Adamts12	2.82982	-0.9953	3.08404	-0.322726	0.746903	NA	0.0429214	0.0134258	0	0.0373786	0.0770961	0.0141694
Adamts13	5.6076	-0.311341	2.13464	-0.145852	0.884038	NA	0.10853	0.193799	0.0612761	0.109971	0.261577	0.146694
Adamts14	146.98	0.47708	0.493122	0.967468	0.33331	0.704673	2.6263	3.20517	4.36527	2.73503	1.74898	1.34778
Adamts15	40.8073	-0.374666	0.865635	-0.432822	0.665144	0.901791	0.857413	0.564861	0.583326	1.54883	0.549748	0.376007
Adamts16	4.46229	-2.51835	2.70887	-0.929668	0.352543	NA	0.109296	0	0.0759213	0.159026	0.117364	0.0379091
Adamts17	172.616	-0.236603	0.434289	-0.544805	0.585887	0.870026	2.63565	2.53568	2.40982	3.46425	2.92699	1.71068
Adamts18	11.21	-1.13432	1.61615	-0.701866	0.482763	NA	0.206512	0.0628141	0.18172	0.207852	0.349458	0.0769936
Adamts19	152.058	-0.407582	0.465899	-0.874829	0.381667	0.743462	2.27734	2.63782	3.43847	3.64325	3.16994	1.68423
Adamts2	120.831	-0.284003	0.515886	-0.550515	0.581966	0.867795	1.56864	1.24488	1.16909	2.27078	1.39554	1.28791
Adamts20	114.865	0.171614	0.523579	0.327771	0.743085	0.930266	2.07578	1.32411	1.35238	1.89465	1.28324	1.01578
Adamts3	78.8269	0.413372	0.633499	0.652521	0.514065	0.830764	1.28147	0.957629	0.885788	0.800479	0.939448	0.652217
Adamts4	296.884	0.303602	0.365906	0.829724	0.406695	0.763699	4.16364	5.08172	4.56907	4.6768	3.24281	3.63445
Adamts5	10.5587	-1.04159	1.70562	-0.610681	0.541411	NA	0.088839	0.0590274	0.0115593	0.520581	0.0406453	0.0153358
Adamts6	37.9743	-1.51256	0.899118	-1.68228	0.0925152	0.382592	0.245996	0.251136	0.593484	0.734815	0.73901	0.365271
Adamts7	182.841	0.406571	0.446707	0.910152	0.362742	0.73111	4.55233	2.65118	3.58785	2.59518	3.00762	2.29553
Adamts8	30.8995	-0.0036385	1.01041	-0.003601	0.997127	0.999064	0.649379	0.585141	0.821663	0.37606	1.11866	0.262797
Adamts9	167.48	0.269432	0.529901	0.508458	0.611132	0.880212	5.35415	1.36893	1.85657	2.35675	2.40462	1.53546
Adamtsl1	18.1753	0.487193	1.2935	0.376648	0.706435	0.919512	0.363018	0.17916	0.106332	0.123923	0.291839	0.173371
Adamtsl2	1.97953	-4.65422	4.7702	-0.975687	0.32922	NA	0	0	0	0.25346	0.0716037	0
Adamtsl3	3.39302	-2.11101	3.26639	-0.646283	0.518096	NA	0	0.048583	0	0.160276	0.0112437	0.0339317
Adamtsl4	75.4492	-0.0874241	0.64489	-0.135564	0.892166	0.974085	1.65155	2.12419	1.54488	2.2215	1.96915	1.22703
Adamtsl5	45.9259	1.99264	0.878981	2.26699	0.0233909	0.169075	0.933285	3.09364	2.3987	0.437649	0.463602	0.540464
Adap1	262.79	1.04649	0.383395	2.72953	0.00634248	0.0730149	16.7898	16.0437	12.8851	11.2657	6.25059	6.10674
Adap2	6.30922	-0.808122	2.10293	-0.384284	0.700768	NA	0.854806	0.0930886	0.074417	0.934906	0.335677	0.452633
Adar	2159.56	0.0624411	0.171652	0.363766	0.716033	0.921323	38.4394	32.3241	36.4666	35.0192	35.8301	20.1317
Adarb1	828.784	-0.121042	0.225981	-0.53563	0.592215	0.871973	11.3146	10.469	10.8549	12.0171	12.7595	9.49528
Adarb2	56.0962	-0.526143	0.739269	-0.711707	0.476646	0.808589	0.745469	1.08562	0.998478	1.19282	1.47757	1.07911
Adat1	716.995	0.206595	0.237188	0.871017	0.383745	0.744867	37.5829	19.792	23.6722	34.5325	17.4427	14.7218
Adat2	106.269	0.127499	0.546259	0.233403	0.815448	0.949939	8.37531	9.43612	6.64066	8.68875	8.66272	11.8651
[truncated: 22,982 more rows]
