# Supplementary material for: DAZL mediates a broad translational program regulating expansion and differentiation of spermatogonial progenitors
Source: eLife. 2020 Jul 20;9:e56523. doi: 10.7554/eLife.56523 (PMC7445011; doi:10.7554/eLife.56523)
Supplement: Figure 2—source data 1. [file elife-56523-fig2-data1.xlsx]

## Sheet: Description
Figure 2 - source data 1
Tab Name	Description
Gonia factors	Spermatogonial factors listed as regulating development and differentiation of undifferentiated spermatogonia in review by Mecklenburg and Hermann (2016). We also included two factors whose functional roles in undifferentiated spermatogonia were reported after the publication of this review, Foxc2 (Wei et al., 2018) and Tsc22d3 (also known as Gilz) (La et al., 2018a)

## Sheet: Gonia factors
Gene.id
Atm
Bcl6b
Cd24a
Cd81
Cd9
Cdh1
Cldn3
Csf1
Csf1r
Cxcr4
Dazl
Dmrt1
Dnmt3l
Egr2
Egr3
Epcam
Epha2
Etv5
Foxc2
Foxo1
Gndf
Gfra1
Gpr125
Id4
Itga6
Itgb1
Kdr
Kit
Lin28a
Lin28b
Lhx1
Mcam
Mycn
Nanos2
Nanos3
Neurog3
Notch1
Nox1
Nox2
Nox4
Pax7
Pou3f1
Pvr
Rarg
Rb1
Sall4
Sohlh1
Sohlh2
Stat3
Sox3
Stra8
T
Taf4b
Tspan8
Tsc22d3
Thy
Uchl1
Utf1
Utp14b
Zbtb16
