# Supplementary material for: DAZL mediates a broad translational program regulating expansion and differentiation of spermatogonial progenitors
Source: eLife journal article supplement (doi:10.7554/elife.56523), 2020-07-20
Supplement: supp [file elife-56523-supp-v1.zip]

Frequency in DAZL 3' UTR crosslinked sites over background frequency

Distance from 3' UTR crosslinked nucleotide

Legend: UGUU(U/A) (blue), UGUU (green), GUU(U/A) (orange)

| Distance from 3' UTR crosslinked nucleotide | UGUU(U/A) | UGUU | GUU(U/A) |
|---------------------------------------------|-----------|------|----------|
| -10                                         | 3.0       | 2.5  | 2.5      |
| -9                                          | 3.5       | 3.0  | 2.5      |
| -8                                          | 3.0       | 3.0  | 2.5      |
| -7                                          | 2.5       | 2.5  | 2.5      |
| -6                                          | 2.0       | 2.0  | 2.0      |
| -5                                          | 1.5       | 1.5  | 1.5      |
| -4                                          | 18.0      | 10.0 | 2.0      |
| -3                                          | 23.0      | 18.0 | 5.0      |
| -2                                          | 18.0      | 10.0 | 10.0     |
| -1                                          | 23.0      | 18.0 | 17.0     |
| 0                                           | 2.0       | 1.0  | 2.0      |
| 1                                           | 1.0       | 1.0  | 1.0      |
| 2                                           | 2.0       | 4.0  | 1.0      |
| 3                                           | 3.0       | 2.0  | 2.0      |
| 4                                           | 3.0       | 3.0  | 2.0      |
| 5                                           | 2.0       | 1.0  | 2.0      |
| 6                                           | 2.0       | 2.0  | 2.0      |
| 7                                           | 2.0       | 1.0  | 2.0      |
| 8                                           | 2.0       | 2.0  | 2.0      |
| 9                                           | 2.0       | 2.0  | 2.0      |
| 10                                          | 2.0       | 2.0  | 2.0      |

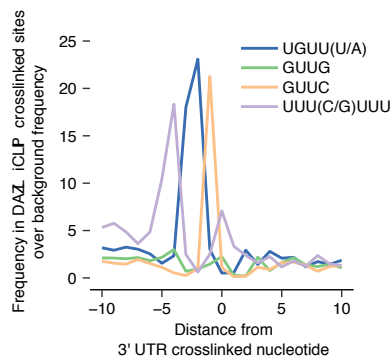

| Motif       | Percentage of binding sites with motif |
|-------------|----------------------------------------|
| GUU         | ~78                                    |
| UGUU(U/A)   | ~40                                    |
| UUU         | ~79                                    |
| UGUU        | ~50                                    |
| GUU(U/A)    | ~65                                    |
| GUUG        | ~11                                    |
| GUUC        | ~16                                    |
| UUU(C/G)UUU | ~10                                    |

| DAZL iCLIP from P6 testes (Zagore et al., 2018) |                                                                                   |                                                                                   |                                                                                   |                                                                                   |                                                                                   |
|-------------------------------------------------|-----------------------------------------------------------------------------------|-----------------------------------------------------------------------------------|-----------------------------------------------------------------------------------|-----------------------------------------------------------------------------------|-----------------------------------------------------------------------------------|
| Region                                          |  |  |  |  |  |
|                                                 | Adjusted <i>P</i> value                                                           |
| 3' UTR                                          | 2.33e-49                                                                          | 1.01e-31                                                                          | 1.03e-9                                                                           | 5.50e-14                                                                          | 2.80e-2                                                                           |

DAZL iCLIP from testes enriched for undifferentiated spermatogonia

| Region    | Adjusted <i>P</i> value | Adjusted <i>P</i> value |
|-----------|-------------------------|-------------------------|
| 3' UTR    | 0.00e+0                 | 0.00e+0                 |
| 5' UTR    | 3.38e-8                 | 4.40e-7                 |
| CDS       | 1.16e-8                 | 4.00e-10                |
| ncRNA     | 4.40e-8                 | 5.56e-7                 |
| Retrogene | 9.76e-12                | 3.88e-8                 |

3' UTR of *Lin28a*

Mouse chr4: 134003641 134003631 134003621

\*\*\*

| Species    | Sequence                      |
|------------|-------------------------------|
| Mouse      | GUA U - CUCC - AUGUUUACUGCUA  |
| Rat        | GUA U - CUCC - AUGUUUACUGCUA  |
| Squirrel   | GUA A - CUCC - AUGUUUACUGCUA  |
| Rabbit     | GUA A - CUCC - AUGUUUA UGC UA |
| Human      | GUA A - CUCC - AUGUUUA UGC UA |
| Chimp      | GUA A - CUCC - AUGUUUA UGC UA |
| Rhesus     | GUA A - CUCC - AUGUUUA UGC UA |
| Pig        | GUA A - CUCC - AUGUUUA UGC UA |
| Cow        | GUA A - CUCC - AUGUUUA UGC UA |
| Cat        | GUA A - CUCC - AUGUUUA UGC UA |
| Dog        | GUA A - CUCC AUGUUUA UGC UA   |
| Elephant   | GUA A - CCC - AUGUUUA UGC UA  |
| Chicken    | GUA A - CUCC - AUGUUUA UGC UA |
| Lizard     | GUA A CUUCC - GUGUUUA UGC UA  |
| Coelacanth | GUA A GCCAC - AUGUUUACUGCUA   |
| Consensus  | GUA A - CUCC - AUGUUUACUGCUA  |

[illegible]
