# Supplementary material for: DAZL mediates a broad translational program regulating expansion and differentiation of spermatogonial progenitors
Source: eLife journal article supplement (doi:10.7554/elife.56523), 2020-07-20

**A**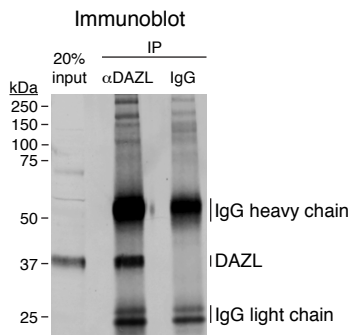**B**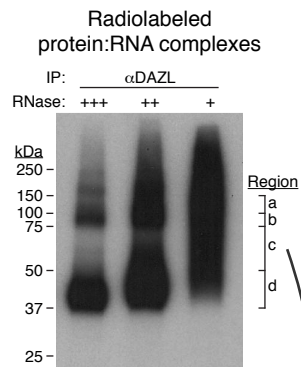**C**

**Radiolabeled protein:RNA complexes**

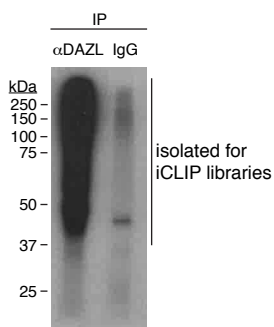

**Radiolabeled RNA isolated from protein:RNA complexes**

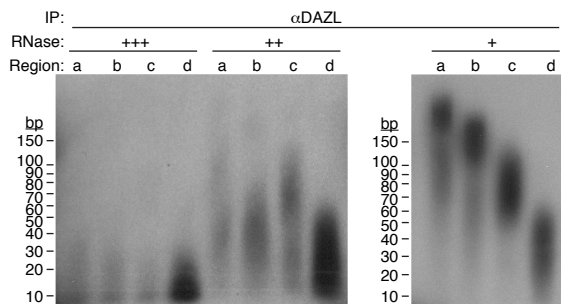**D**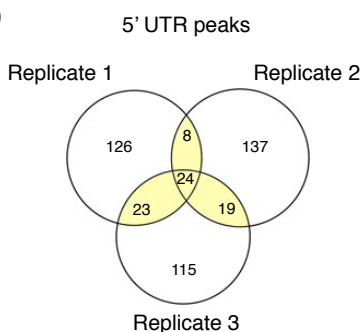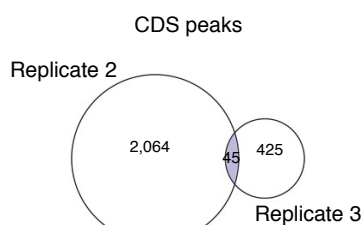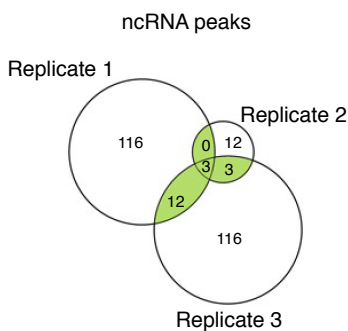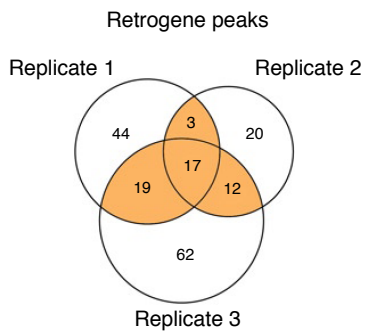

Supplement: supp [file elife-56523-supp-v1.zip]
