# Supplementary material for: DAZL mediates a broad translational program regulating expansion and differentiation of spermatogonial progenitors
Source: eLife journal article supplement (doi:10.7554/elife.56523), 2020-07-20
Supplement: supp [file elife-56523-supp-v1.zip]

Archive with 22 entries (22 files):
- elife_poa_e56523_Transparent_Reporting_File.docx
- elife_poa_e56523_Figure_1_source_data_1.xlsx
- elife_poa_e56523_Figure_1_source_data_2.xlsx
- elife_poa_e56523_Figure_2_source_data_1.xlsx
- elife_poa_e56523_Figure_2_source_data_2.xlsx
- elife_poa_e56523_Figure_2_source_data_3.xlsx
- elife_poa_e56523_Figure_3_source_data_1.xlsx
- elife_poa_e56523_Figure_3_source_data_2.xlsx
- elife_poa_e56523_Figure_3_source_data_3.xlsx
- elife_poa_e56523_Figure_3_source_data_4.xlsx
- elife_poa_e56523_Figure_3_source_data_5.xlsx
- elife_poa_e56523_Figure_4_source_data_1.xlsx
- elife_poa_e56523_Figure_5_source_data_1.xlsx
- elife_poa_e56523_Supplementary_file_1.xlsx
- elife_poa_e56523_Figure_1_figure_supplement_1.pdf
- elife_poa_e56523_Figure_1_figure_supplement_2.pdf
- elife_poa_e56523_Figure_1_figure_supplement_3.pdf
- elife_poa_e56523_Figure_2_figure_supplement_1.pdf
- elife_poa_e56523_Figure_2_figure_supplement_2.pdf
- elife_poa_e56523_Figure_4_figure_supplement_1.pdf
- elife_poa_e56523_Figure_4_figure_supplement_2.pdf
- elife_poa_e56523_Figure_5_figure_supplement_1.pdf
