# Supplementary material for: DAZL mediates a broad translational program regulating expansion and differentiation of spermatogonial progenitors
Source: eLife journal article supplement (doi:10.7554/elife.56523), 2020-07-20
Supplement: supp [file elife-56523-supp-v1.zip › elife_poa_e56523_Figure_1_source_data_1.xlsx]

## Sheet: Description
Figure 1 - source data 1
Tab Name	Description
Sample metadata	Genotype and stage of animals used in these experiments.
FOXC2	Quantification of FOXC2-positive and SOX9-positive cells in tubule cross sections from control and Dazl cKO testes.
ZBTB16	Quantification of ZBTB16-positive and SOX9-positive cells in tubule cross sections from control and Dazl cKO testes.
KIT	Quantification of KIT-positive and SOX9-positive cells in tubule cross sections from control and Dazl cKO testes.
SOX9 per area	Quantification of SOX9-positive cells per 0.03mm2 (172800 pixels) area of tubule cross section from control and Dazl cKO testes. Tubules from ZBTB16 quantification experiments.

## Sheet: Sample metadata
Sample	Dazl status	Genotype	Age	Notes
7007	cKO	Dazl2L/-; Ddx4Cre/+; Pou5f1:EGFP/+	6months	Sample cKO1 in differential expression analysis of sorted Pou5f1:EGFP-positive spermatogonia (Figure 1-source data 2)
7058	Control	Dazl2L/+; Ddx4Cre/+; Pou5f1:EGFP/+	6months	Sample Control1 in differential expression analysis of sorted Pou5f1:EGFP-positive spermatogonia (Figure 1-source data 2)
7565	cKO	Dazl2L/1L; Ddx4Cre/+; +/+	6months
7568	Control	Dazl1L/+; Ddx4Cre/+; +/+	6months

## Sheet: FOXC2
ImageNumber	ObjectNumber	Metadata_Genotype	Metadata_Sample	Metadata_Section	FOXC2pos	SOX9pos	Dazl_status
2	8	DazlcKO	7007	section2_region2	0	13	mosaic
2	25	DazlcKO	7007	section2_region2	0	12	mosaic
2	14	DazlcKO	7007	section2_region2	0	26	mosaic
1	67	DazlcKO	7007	section1_region1	0	25	mosaic
1	31	DazlcKO	7007	section1_region1	1	19	mosaic
2	19	DazlcKO	7007	section2_region2	0	18	mosaic
1	26	DazlcKO	7007	section1_region1	1	11	mosaic
1	65	DazlcKO	7007	section1_region1	0	17	mosaic
2	7	DazlcKO	7007	section2_region2	0	15	mosaic
1	33	DazlcKO	7007	section1_region1	0	10	mosaic
1	40	DazlcKO	7007	section1_region1	0	23	mosaic
1	38	DazlcKO	7007	section1_region1	0	7	mosaic
2	2	DazlcKO	7007	section2_region2	0	39	mosaic
1	70	DazlcKO	7007	section1_region1	1	21	mosaic
1	32	DazlcKO	7007	section1_region1	0	19	mosaic
2	17	DazlcKO	7007	section2_region2	0	10	mosaic
1	63	DazlcKO	7007	section1_region1	0	9	mosaic
1	29	DazlcKO	7007	section1_region1	0	24	mosaic
1	59	DazlcKO	7007	section1_region1	0	14	mosaic
1	14	DazlcKO	7007	section1_region1	0	22	mosaic
1	15	DazlcKO	7007	section1_region1	0	25	mosaic
1	69	DazlcKO	7007	section1_region1	0	10	mosaic
1	68	DazlcKO	7007	section1_region1	0	17	mosaic
1	48	DazlcKO	7007	section1_region1	0	11	mosaic
1	24	DazlcKO	7007	section1_region1	0	9	mosaic
6	26	DazlcKO	7565	section1_region2	0	21	mosaic
6	11	DazlcKO	7565	section1_region2	0	26	mosaic
6	15	DazlcKO	7565	section1_region2	1	26	mosaic
5	15	DazlcKO	7565	section1_region1	0	26	mosaic
7	4	DazlcKO	7565	section2_region1	3	43	mosaic
6	10	DazlcKO	7565	section1_region2	0	11	mosaic
7	3	DazlcKO	7565	section2_region1	3	45	mosaic
5	13	DazlcKO	7565	section1_region1	0	22	mosaic
6	19	DazlcKO	7565	section1_region2	0	15	mosaic
7	9	DazlcKO	7565	section2_region1	1	29	mosaic
6	6	DazlcKO	7565	section1_region2	0	12	mosaic
7	7	DazlcKO	7565	section2_region1	0	60	mosaic
7	2	DazlcKO	7565	section2_region1	3	66	mosaic
7	5	DazlcKO	7565	section2_region1	2	46	mosaic
5	26	DazlcKO	7565	section1_region1	1	49	mosaic
5	4	DazlcKO	7565	section1_region1	0	17	mosaic
6	3	DazlcKO	7565	section1_region2	0	17	mosaic
5	3	DazlcKO	7565	section1_region1	0	22	mosaic
6	2	DazlcKO	7565	section1_region2	1	14	mosaic
5	12	DazlcKO	7565	section1_region1	0	22	mosaic
6	7	DazlcKO	7565	section1_region2	0	27	mosaic
6	9	DazlcKO	7565	section1_region2	0	24	mosaic
5	11	DazlcKO	7565	section1_region1	0	22	mosaic
6	16	DazlcKO	7565	section1_region2	0	22	mosaic
6	13	DazlcKO	7565	section1_region2	0	35	mosaic
1	12	DazlcKO	7007	section1_region1	0	18	neg
1	43	DazlcKO	7007	section1_region1	0	17	neg
2	3	DazlcKO	7007	section2_region2	0	17	neg
1	35	DazlcKO	7007	section1_region1	0	9	neg
1	44	DazlcKO	7007	section1_region1	0	26	neg
1	4	DazlcKO	7007	section1_region1	0	22	neg
2	6	DazlcKO	7007	section2_region2	0	24	neg
1	6	DazlcKO	7007	section1_region1	0	22	neg
1	22	DazlcKO	7007	section1_region1	0	28	neg
2	15	DazlcKO	7007	section2_region2	0	17	neg
1	49	DazlcKO	7007	section1_region1	1	21	neg
1	16	DazlcKO	7007	section1_region1	0	12	neg
1	60	DazlcKO	7007	section1_region1	0	12	neg
2	4	DazlcKO	7007	section2_region2	0	35	neg
1	34	DazlcKO	7007	section1_region1	0	8	neg
1	47	DazlcKO	7007	section1_region1	1	13	neg
1	54	DazlcKO	7007	section1_region1	0	6	neg
2	26	DazlcKO	7007	section2_region2	0	14	neg
1	36	DazlcKO	7007	section1_region1	0	9	neg
1	62	DazlcKO	7007	section1_region1	0	31	neg
1	30	DazlcKO	7007	section1_region1	1	59	neg
2	21	DazlcKO	7007	section2_region2	0	15	neg
1	8	DazlcKO	7007	section1_region1	1	21	neg
1	13	DazlcKO	7007	section1_region1	0	23	neg
1	9	DazlcKO	7007	section1_region1	0	49	neg
5	30	DazlcKO	7565	section1_region1	1	32	neg
5	21	DazlcKO	7565	section1_region1	0	42	neg
6	24	DazlcKO	7565	section1_region2	0	22	neg
5	22	DazlcKO	7565	section1_region1	1	24	neg
6	17	DazlcKO	7565	section1_region2	1	18	neg
6	20	DazlcKO	7565	section1_region2	0	14	neg
5	20	DazlcKO	7565	section1_region1	0	24	neg
6	25	DazlcKO	7565	section1_region2	0	27	neg
6	30	DazlcKO	7565	section1_region2	0	19	neg
5	28	DazlcKO	7565	section1_region1	0	30	neg
7	10	DazlcKO	7565	section2_region1	0	32	neg
6	27	DazlcKO	7565	section1_region2	1	32	neg
6	28	DazlcKO	7565	section1_region2	0	17	neg
7	8	DazlcKO	7565	section2_region1	1	35	neg
5	16	DazlcKO	7565	section1_region1	2	39	neg
6	5	DazlcKO	7565	section1_region2	1	15	neg
5	29	DazlcKO	7565	section1_region1	0	33	neg
5	23	DazlcKO	7565	section1_region1	0	35	neg
6	21	DazlcKO	7565	section1_region2	0	39	neg
5	5	DazlcKO	7565	section1_region1	0	48	neg
5	2	DazlcKO	7565	section1_region1	0	29	neg
7	11	DazlcKO	7565	section2_region1	0	23	neg
6	29	DazlcKO	7565	section1_region2	1	40	neg
5	18	DazlcKO	7565	section1_region1	1	119	neg
5	19	DazlcKO	7565	section1_region1	1	58	neg
8	10	Dazlcontrol	7568	section1_region1	0	28	pos
10	3	Dazlcontrol	7568	section2_region2	0	18	pos
9	6	Dazlcontrol	7568	section2_region1	0	28	pos
8	6	Dazlcontrol	7568	section1_region1	0	38	pos
10	33	Dazlcontrol	7568	section2_region2	0	19	pos
10	27	Dazlcontrol	7568	section2_region2	0	51	pos
9	3	Dazlcontrol	7568	section2_region1	0	31	pos
9	14	Dazlcontrol	7568	section2_region1	1	23	pos
8	2	Dazlcontrol	7568	section1_region1	0	32	pos
8	17	Dazlcontrol	7568	section1_region1	0	27	pos
8	16	Dazlcontrol	7568	section1_region1	0	35	pos
9	12	Dazlcontrol	7568	section2_region1	1	27	pos
8	3	Dazlcontrol	7568	section1_region1	0	7	pos
10	38	Dazlcontrol	7568	section2_region2	0	26	pos
9	15	Dazlcontrol	7568	section2_region1	0	29	pos
10	32	Dazlcontrol	7568	section2_region2	0	23	pos
8	19	Dazlcontrol	7568	section1_region1	1	19	pos
10	31	Dazlcontrol	7568	section2_region2	1	81	pos
8	14	Dazlcontrol	7568	section1_region1	0	25	pos
9	20	Dazlcontrol	7568	section2_region1	0	18	pos
9	21	Dazlcontrol	7568	section2_region1	0	23	pos
9	11	Dazlcontrol	7568	section2_region1	0	28	pos
10	28	Dazlcontrol	7568	section2_region2	1	60	pos
8	11	Dazlcontrol	7568	section1_region1	0	36	pos
8	20	Dazlcontrol	7568	section1_region1	0	27	pos
9	2	Dazlcontrol	7568	section2_region1	0	18	pos
9	18	Dazlcontrol	7568	section2_region1	1	73	pos
10	10	Dazlcontrol	7568	section2_region2	1	29	pos
10	5	Dazlcontrol	7568	section2_region2	0	24	pos
10	35	Dazlcontrol	7568	section2_region2	0	24	pos
10	36	Dazlcontrol	7568	section2_region2	0	30	pos
9	19	Dazlcontrol	7568	section2_region1	0	18	pos
9	4	Dazlcontrol	7568	section2_region1	0	19	pos
8	8	Dazlcontrol	7568	section1_region1	0	16	pos
9	23	Dazlcontrol	7568	section2_region1	0	13	pos
9	16	Dazlcontrol	7568	section2_region1	0	25	pos
10	15	Dazlcontrol	7568	section2_region2	1	34	pos
9	9	Dazlcontrol	7568	section2_region1	0	40	pos
8	7	Dazlcontrol	7568	section1_region1	0	20	pos
9	5	Dazlcontrol	7568	section2_region1	0	36	pos
9	22	Dazlcontrol	7568	section2_region1	0	22	pos
10	30	Dazlcontrol	7568	section2_region2	0	19	pos
10	34	Dazlcontrol	7568	section2_region2	0	28	pos
9	10	Dazlcontrol	7568	section2_region1	0	73	pos
10	18	Dazlcontrol	7568	section2_region2	0	30	pos
9	13	Dazlcontrol	7568	section2_region1	1	25	pos
8	9	Dazlcontrol	7568	section1_region1	0	32	pos
10	25	Dazlcontrol	7568	section2_region2	0	47	pos
10	6	Dazlcontrol	7568	section2_region2	0	12	pos
9	17	Dazlcontrol	7568	section2_region1	0	26	pos
3	14	Dazlcontrol	7058	section1	0	45	pos
3	26	Dazlcontrol	7058	section1	0	30	pos
4	11	Dazlcontrol	7058	section2	0	25	pos
3	19	Dazlcontrol	7058	section1	0	50	pos
4	7	Dazlcontrol	7058	section2	0	45	pos
4	9	Dazlcontrol	7058	section2	1	24	pos
4	2	Dazlcontrol	7058	section2	0	32	pos
3	20	Dazlcontrol	7058	section1	0	26	pos
3	12	Dazlcontrol	7058	section1	0	23	pos
3	10	Dazlcontrol	7058	section1	0	18	pos
3	32	Dazlcontrol	7058	section1	0	26	pos
3	13	Dazlcontrol	7058	section1	0	14	pos
3	33	Dazlcontrol	7058	section1	0	52	pos
4	20	Dazlcontrol	7058	section2	0	30	pos
3	25	Dazlcontrol	7058	section1	0	24	pos
4	12	Dazlcontrol	7058	section2	0	28	pos
3	17	Dazlcontrol	7058	section1	0	25	pos
3	31	Dazlcontrol	7058	section1	0	34	pos
3	15	Dazlcontrol	7058	section1	0	40	pos
4	5	Dazlcontrol	7058	section2	1	40	pos
4	16	Dazlcontrol	7058	section2	0	31	pos
3	28	Dazlcontrol	7058	section1	0	38	pos
3	9	Dazlcontrol	7058	section1	0	28	pos
3	22	Dazlcontrol	7058	section1	0	23	pos
3	16	Dazlcontrol	7058	section1	0	20	pos
3	29	Dazlcontrol	7058	section1	0	27	pos
4	6	Dazlcontrol	7058	section2	0	18	pos
3	3	Dazlcontrol	7058	section1	0	44	pos
3	18	Dazlcontrol	7058	section1	0	29	pos
3	11	Dazlcontrol	7058	section1	0	23	pos
3	30	Dazlcontrol	7058	section1	0	43	pos
3	6	Dazlcontrol	7058	section1	0	47	pos
4	17	Dazlcontrol	7058	section2	0	37	pos
4	18	Dazlcontrol	7058	section2	0	33	pos
3	5	Dazlcontrol	7058	section1	0	40	pos
3	34	Dazlcontrol	7058	section1	1	36	pos
4	3	Dazlcontrol	7058	section2	0	28	pos
3	24	Dazlcontrol	7058	section1	0	23	pos
3	23	Dazlcontrol	7058	section1	0	38	pos
3	8	Dazlcontrol	7058	section1	0	33	pos
4	8	Dazlcontrol	7058	section2	0	22	pos
4	13	Dazlcontrol	7058	section2	0	13	pos
4	19	Dazlcontrol	7058	section2	0	18	pos
3	7	Dazlcontrol	7058	section1	0	41	pos
3	4	Dazlcontrol	7058	section1	0	43	pos
4	10	Dazlcontrol	7058	section2	0	32	pos
3	21	Dazlcontrol	7058	section1	0	25	pos
3	27	Dazlcontrol	7058	section1	0	22	pos
4	4	Dazlcontrol	7058	section2	0	40	pos
4	14	Dazlcontrol	7058	section2	1	20	pos

## Sheet: ZBTB16
ImageNumber	ObjectNumber	Metadata_Genotype	Metadata_Sample	Metadata_Section	ZBTB16pos	SOX9pos	DAZL_status
1	2	DazlcKO	7007	section1_region1	4	16	mosaic
1	12	DazlcKO	7007	section1_region1	1	22	mosaic
3	3	DazlcKO	7007	section1_region2.2	2	37	mosaic
2	15	DazlcKO	7007	section1_region2	3	15	mosaic
1	59	DazlcKO	7007	section1_region1	6	17	mosaic
1	5	DazlcKO	7007	section1_region1	7	26	mosaic
1	52	DazlcKO	7007	section1_region1	4	32	mosaic
1	4	DazlcKO	7007	section1_region1	6	18	mosaic
3	7	DazlcKO	7007	section1_region2.2	2	21	mosaic
1	19	DazlcKO	7007	section1_region1	5	9	mosaic
1	21	DazlcKO	7007	section1_region1	2	18	mosaic
1	28	DazlcKO	7007	section1_region1	3	11	mosaic
2	8	DazlcKO	7007	section1_region2	9	74	mosaic
1	64	DazlcKO	7007	section1_region1	2	36	mosaic
3	12	DazlcKO	7007	section1_region2.2	3	24	mosaic
2	13	DazlcKO	7007	section1_region2	4	17	mosaic
2	27	DazlcKO	7007	section1_region2	0	20	mosaic
1	17	DazlcKO	7007	section1_region1	4	36	mosaic
2	7	DazlcKO	7007	section1_region2	0	18	mosaic
2	25	DazlcKO	7007	section1_region2	1	35	mosaic
2	24	DazlcKO	7007	section1_region2	3	22	mosaic
3	13	DazlcKO	7007	section1_region2.2	7	11	mosaic
1	18	DazlcKO	7007	section1_region1	3	23	mosaic
1	50	DazlcKO	7007	section1_region1	1	21	mosaic
2	23	DazlcKO	7007	section1_region2	2	23	mosaic
7	45	DazlcKO	7565	section1_region1	21	74	mosaic
9	6	DazlcKO	7565	section1_region3	3	14	mosaic
9	9	DazlcKO	7565	section1_region3	10	10	mosaic
9	35	DazlcKO	7565	section1_region3	3	12	mosaic
9	40	DazlcKO	7565	section1_region3	1	30	mosaic
7	32	DazlcKO	7565	section1_region1	3	48	mosaic
7	52	DazlcKO	7565	section1_region1	16	27	mosaic
7	2	DazlcKO	7565	section1_region1	3	9	mosaic
7	34	DazlcKO	7565	section1_region1	1	35	mosaic
9	7	DazlcKO	7565	section1_region3	6	24	mosaic
8	25	DazlcKO	7565	section1_region2	4	29	mosaic
7	43	DazlcKO	7565	section1_region1	6	32	mosaic
9	39	DazlcKO	7565	section1_region3	5	19	mosaic
8	30	DazlcKO	7565	section1_region2	8	42	mosaic
8	15	DazlcKO	7565	section1_region2	3	17	mosaic
8	21	DazlcKO	7565	section1_region2	17	39	mosaic
7	30	DazlcKO	7565	section1_region1	16	40	mosaic
7	9	DazlcKO	7565	section1_region1	4	35	mosaic
7	50	DazlcKO	7565	section1_region1	5	26	mosaic
7	38	DazlcKO	7565	section1_region1	9	29	mosaic
8	2	DazlcKO	7565	section1_region2	8	98	mosaic
7	25	DazlcKO	7565	section1_region1	4	39	mosaic
9	32	DazlcKO	7565	section1_region3	1	21	mosaic
8	8	DazlcKO	7565	section1_region2	12	46	mosaic
7	15	DazlcKO	7565	section1_region1	4	20	mosaic
1	11	DazlcKO	7007	section1_region1	3	25	neg
1	8	DazlcKO	7007	section1_region1	0	13	neg
1	9	DazlcKO	7007	section1_region1	4	9	neg
1	77	DazlcKO	7007	section1_region1	2	18	neg
1	65	DazlcKO	7007	section1_region1	3	29	neg
3	2	DazlcKO	7007	section1_region2.2	3	20	neg
1	10	DazlcKO	7007	section1_region1	1	21	neg
2	11	DazlcKO	7007	section1_region2	2	34	neg
1	78	DazlcKO	7007	section1_region1	1	9	neg
2	12	DazlcKO	7007	section1_region2	1	16	neg
1	72	DazlcKO	7007	section1_region1	1	15	neg
1	73	DazlcKO	7007	section1_region1	1	20	neg
2	19	DazlcKO	7007	section1_region2	2	17	neg
3	11	DazlcKO	7007	section1_region2.2	10	33	neg
1	27	DazlcKO	7007	section1_region1	1	16	neg
1	79	DazlcKO	7007	section1_region1	0	17	neg
1	45	DazlcKO	7007	section1_region1	2	9	neg
1	54	DazlcKO	7007	section1_region1	2	8	neg
1	31	DazlcKO	7007	section1_region1	0	12	neg
3	4	DazlcKO	7007	section1_region2.2	5	35	neg
2	10	DazlcKO	7007	section1_region2	13	78	neg
3	5	DazlcKO	7007	section1_region2.2	4	33	neg
2	18	DazlcKO	7007	section1_region2	2	23	neg
1	71	DazlcKO	7007	section1_region1	1	15	neg
2	6	DazlcKO	7007	section1_region2	3	22	neg
8	18	DazlcKO	7565	section1_region2	4	16	neg
7	57	DazlcKO	7565	section1_region1	1	14	neg
9	38	DazlcKO	7565	section1_region3	3	26	neg
7	40	DazlcKO	7565	section1_region1	10	27	neg
7	58	DazlcKO	7565	section1_region1	8	27	neg
7	46	DazlcKO	7565	section1_region1	3	40	neg
9	4	DazlcKO	7565	section1_region3	3	20	neg
9	44	DazlcKO	7565	section1_region3	6	20	neg
7	24	DazlcKO	7565	section1_region1	3	13	neg
9	3	DazlcKO	7565	section1_region3	0	10	neg
7	16	DazlcKO	7565	section1_region1	5	20	neg
8	11	DazlcKO	7565	section1_region2	13	45	neg
7	27	DazlcKO	7565	section1_region1	4	31	neg
7	62	DazlcKO	7565	section1_region1	2	26	neg
9	41	DazlcKO	7565	section1_region3	2	32	neg
8	22	DazlcKO	7565	section1_region2	0	30	neg
8	19	DazlcKO	7565	section1_region2	5	43	neg
9	42	DazlcKO	7565	section1_region3	5	15	neg
7	7	DazlcKO	7565	section1_region1	5	11	neg
7	3	DazlcKO	7565	section1_region1	3	26	neg
8	12	DazlcKO	7565	section1_region2	7	42	neg
8	13	DazlcKO	7565	section1_region2	11	37	neg
7	48	DazlcKO	7565	section1_region1	5	25	neg
8	9	DazlcKO	7565	section1_region2	5	32	neg
7	54	DazlcKO	7565	section1_region1	2	16	neg
11	16	Dazlcontrol	7568	section1_region2	9	31	pos
11	5	Dazlcontrol	7568	section1_region2	6	22	pos
11	23	Dazlcontrol	7568	section1_region2	16	60	pos
12	13	Dazlcontrol	7568	section1_region3	12	39	pos
11	2	Dazlcontrol	7568	section1_region2	14	19	pos
11	14	Dazlcontrol	7568	section1_region2	6	16	pos
11	12	Dazlcontrol	7568	section1_region2	6	33	pos
11	7	Dazlcontrol	7568	section1_region2	13	36	pos
12	16	Dazlcontrol	7568	section1_region3	3	42	pos
10	5	Dazlcontrol	7568	section1_region1	6	45	pos
12	11	Dazlcontrol	7568	section1_region3	7	35	pos
12	5	Dazlcontrol	7568	section1_region3	4	24	pos
11	17	Dazlcontrol	7568	section1_region2	7	40	pos
12	4	Dazlcontrol	7568	section1_region3	14	35	pos
10	2	Dazlcontrol	7568	section1_region1	4	9	pos
12	3	Dazlcontrol	7568	section1_region3	7	27	pos
11	3	Dazlcontrol	7568	section1_region2	6	17	pos
10	8	Dazlcontrol	7568	section1_region1	11	44	pos
12	2	Dazlcontrol	7568	section1_region3	4	24	pos
10	10	Dazlcontrol	7568	section1_region1	14	34	pos
12	7	Dazlcontrol	7568	section1_region3	7	22	pos
11	10	Dazlcontrol	7568	section1_region2	9	16	pos
11	8	Dazlcontrol	7568	section1_region2	7	39	pos
11	4	Dazlcontrol	7568	section1_region2	6	15	pos
12	9	Dazlcontrol	7568	section1_region3	10	24	pos
11	18	Dazlcontrol	7568	section1_region2	4	18	pos
12	23	Dazlcontrol	7568	section1_region3	3	18	pos
11	25	Dazlcontrol	7568	section1_region2	1	19	pos
10	7	Dazlcontrol	7568	section1_region1	11	24	pos
10	6	Dazlcontrol	7568	section1_region1	4	10	pos
11	20	Dazlcontrol	7568	section1_region2	12	34	pos
11	9	Dazlcontrol	7568	section1_region2	6	59	pos
12	8	Dazlcontrol	7568	section1_region3	5	28	pos
11	21	Dazlcontrol	7568	section1_region2	3	18	pos
11	15	Dazlcontrol	7568	section1_region2	3	20	pos
12	6	Dazlcontrol	7568	section1_region3	5	22	pos
12	22	Dazlcontrol	7568	section1_region3	7	25	pos
11	19	Dazlcontrol	7568	section1_region2	19	23	pos
11	22	Dazlcontrol	7568	section1_region2	16	32	pos
11	6	Dazlcontrol	7568	section1_region2	13	23	pos
12	10	Dazlcontrol	7568	section1_region3	5	15	pos
11	24	Dazlcontrol	7568	section1_region2	3	20	pos
10	9	Dazlcontrol	7568	section1_region1	7	25	pos
12	24	Dazlcontrol	7568	section1_region3	4	26	pos
10	3	Dazlcontrol	7568	section1_region1	10	24	pos
11	13	Dazlcontrol	7568	section1_region2	11	17	pos
12	14	Dazlcontrol	7568	section1_region3	7	32	pos
10	4	Dazlcontrol	7568	section1_region1	18	37	pos
12	15	Dazlcontrol	7568	section1_region3	5	19	pos
11	11	Dazlcontrol	7568	section1_region2	8	25	pos
4	41	Dazlcontrol	7058	section1_region1	1	2	pos
6	7	Dazlcontrol	7058	section1_region3	15	6	pos
6	18	Dazlcontrol	7058	section1_region3	4	16	pos
4	52	Dazlcontrol	7058	section1_region1	4	10	pos
6	23	Dazlcontrol	7058	section1_region3	7	5	pos
6	25	Dazlcontrol	7058	section1_region3	8	14	pos
4	27	Dazlcontrol	7058	section1_region1	10	13	pos
6	14	Dazlcontrol	7058	section1_region3	5	2	pos
4	18	Dazlcontrol	7058	section1_region1	8	10	pos
5	3	Dazlcontrol	7058	section1_region2	5	11	pos
6	22	Dazlcontrol	7058	section1_region3	3	18	pos
4	58	Dazlcontrol	7058	section1_region1	6	14	pos
4	60	Dazlcontrol	7058	section1_region1	6	12	pos
5	6	Dazlcontrol	7058	section1_region2	6	13	pos
4	31	Dazlcontrol	7058	section1_region1	8	11	pos
6	4	Dazlcontrol	7058	section1_region3	2	11	pos
4	45	Dazlcontrol	7058	section1_region1	8	5	pos
4	8	Dazlcontrol	7058	section1_region1	4	10	pos
5	4	Dazlcontrol	7058	section1_region2	5	27	pos
5	8	Dazlcontrol	7058	section1_region2	0	16	pos
4	34	Dazlcontrol	7058	section1_region1	3	14	pos
4	2	Dazlcontrol	7058	section1_region1	10	18	pos
4	3	Dazlcontrol	7058	section1_region1	1	15	pos
4	59	Dazlcontrol	7058	section1_region1	5	13	pos
4	15	Dazlcontrol	7058	section1_region1	2	2	pos
6	3	Dazlcontrol	7058	section1_region3	3	11	pos
6	6	Dazlcontrol	7058	section1_region3	5	16	pos
4	9	Dazlcontrol	7058	section1_region1	8	6	pos
4	22	Dazlcontrol	7058	section1_region1	0	12	pos
6	16	Dazlcontrol	7058	section1_region3	5	21	pos
6	19	Dazlcontrol	7058	section1_region3	2	19	pos
4	30	Dazlcontrol	7058	section1_region1	4	3	pos
6	5	Dazlcontrol	7058	section1_region3	2	16	pos
6	17	Dazlcontrol	7058	section1_region3	4	18	pos
4	35	Dazlcontrol	7058	section1_region1	4	9	pos
4	16	Dazlcontrol	7058	section1_region1	0	8	pos
6	15	Dazlcontrol	7058	section1_region3	6	11	pos
4	14	Dazlcontrol	7058	section1_region1	3	7	pos
4	57	Dazlcontrol	7058	section1_region1	5	13	pos
6	13	Dazlcontrol	7058	section1_region3	8	13	pos
6	10	Dazlcontrol	7058	section1_region3	5	16	pos
4	29	Dazlcontrol	7058	section1_region1	6	2	pos
4	65	Dazlcontrol	7058	section1_region1	2	12	pos
4	56	Dazlcontrol	7058	section1_region1	3	2	pos
6	24	Dazlcontrol	7058	section1_region3	6	19	pos
4	6	Dazlcontrol	7058	section1_region1	2	13	pos
4	13	Dazlcontrol	7058	section1_region1	7	9	pos
4	5	Dazlcontrol	7058	section1_region1	15	14	pos
4	49	Dazlcontrol	7058	section1_region1	6	17	pos
4	11	Dazlcontrol	7058	section1_region1	6	22	pos

## Sheet: KIT
ImageNumber	ObjectNumber	Metadata_Genotype2	Metadata_Sample	Metadata_Section4	KITpos	SOX9pos	DAZL_status
1	12	DazlcKO	7007	section1	4	17	mosaic
1	15	DazlcKO	7007	section1	1	24	mosaic
1	3	DazlcKO	7007	section1	1	18	mosaic
1	56	DazlcKO	7007	section1	0	21	mosaic
1	36	DazlcKO	7007	section1	0	17	mosaic
1	54	DazlcKO	7007	section1	1	26	mosaic
1	51	DazlcKO	7007	section1	3	19	mosaic
1	44	DazlcKO	7007	section1	0	18	mosaic
1	7	DazlcKO	7007	section1	6	65	mosaic
1	49	DazlcKO	7007	section1	0	19	mosaic
1	55	DazlcKO	7007	section1	1	16	mosaic
2	4	DazlcKO	7007	section2	1	23	mosaic
1	28	DazlcKO	7007	section1	0	15	mosaic
1	32	DazlcKO	7007	section1	0	31	mosaic
2	2	DazlcKO	7007	section2	11	19	mosaic
1	13	DazlcKO	7007	section1	2	23	mosaic
1	35	DazlcKO	7007	section1	0	27	mosaic
1	4	DazlcKO	7007	section1	1	18	mosaic
1	29	DazlcKO	7007	section1	0	18	mosaic
1	20	DazlcKO	7007	section1	10	6	mosaic
1	57	DazlcKO	7007	section1	0	25	mosaic
1	5	DazlcKO	7007	section1	0	27	mosaic
1	38	DazlcKO	7007	section1	3	25	mosaic
1	48	DazlcKO	7007	section1	1	14	mosaic
1	50	DazlcKO	7007	section1	0	21	mosaic
4	68	DazlcKO	7565	section2	1	40	mosaic
4	24	DazlcKO	7565	section2	2	42	mosaic
4	27	DazlcKO	7565	section2	0	25	mosaic
4	53	DazlcKO	7565	section2	1	24	mosaic
4	75	DazlcKO	7565	section2	0	14	mosaic
4	47	DazlcKO	7565	section2	6	11	mosaic
4	10	DazlcKO	7565	section2	0	33	mosaic
4	14	DazlcKO	7565	section2	0	22	mosaic
4	8	DazlcKO	7565	section2	0	18	mosaic
4	12	DazlcKO	7565	section2	2	20	mosaic
4	29	DazlcKO	7565	section2	1	24	mosaic
4	31	DazlcKO	7565	section2	0	12	mosaic
4	54	DazlcKO	7565	section2	0	28	mosaic
4	25	DazlcKO	7565	section2	2	28	mosaic
4	70	DazlcKO	7565	section2	2	26	mosaic
4	13	DazlcKO	7565	section2	1	10	mosaic
4	17	DazlcKO	7565	section2	1	6	mosaic
4	6	DazlcKO	7565	section2	0	22	mosaic
4	51	DazlcKO	7565	section2	0	13	mosaic
4	30	DazlcKO	7565	section2	0	21	mosaic
4	4	DazlcKO	7565	section2	0	8	mosaic
4	63	DazlcKO	7565	section2	1	16	mosaic
4	5	DazlcKO	7565	section2	2	25	mosaic
4	19	DazlcKO	7565	section2	0	21	mosaic
4	26	DazlcKO	7565	section2	0	15	mosaic
1	6	DazlcKO	7007	section1	6	21	neg
2	6	DazlcKO	7007	section2	0	20	neg
1	34	DazlcKO	7007	section1	0	19	neg
1	41	DazlcKO	7007	section1	0	21	neg
1	14	DazlcKO	7007	section1	1	32	neg
1	23	DazlcKO	7007	section1	1	20	neg
1	21	DazlcKO	7007	section1	1	43	neg
1	30	DazlcKO	7007	section1	0	17	neg
1	17	DazlcKO	7007	section1	0	17	neg
1	27	DazlcKO	7007	section1	1	22	neg
1	18	DazlcKO	7007	section1	1	29	neg
1	33	DazlcKO	7007	section1	1	8	neg
1	9	DazlcKO	7007	section1	2	23	neg
1	24	DazlcKO	7007	section1	0	15	neg
1	43	DazlcKO	7007	section1	1	21	neg
1	8	DazlcKO	7007	section1	1	24	neg
1	22	DazlcKO	7007	section1	3	23	neg
1	11	DazlcKO	7007	section1	1	10	neg
1	25	DazlcKO	7007	section1	0	19	neg
2	5	DazlcKO	7007	section2	2	14	neg
1	26	DazlcKO	7007	section1	1	18	neg
1	42	DazlcKO	7007	section1	1	18	neg
1	40	DazlcKO	7007	section1	0	18	neg
1	52	DazlcKO	7007	section1	0	25	neg
1	39	DazlcKO	7007	section1	0	24	neg
4	80	DazlcKO	7565	section2	0	20	neg
4	46	DazlcKO	7565	section2	0	9	neg
4	35	DazlcKO	7565	section2	0	38	neg
4	41	DazlcKO	7565	section2	2	31	neg
4	16	DazlcKO	7565	section2	0	16	neg
4	38	DazlcKO	7565	section2	0	29	neg
4	71	DazlcKO	7565	section2	0	18	neg
4	79	DazlcKO	7565	section2	0	33	neg
4	50	DazlcKO	7565	section2	3	9	neg
4	56	DazlcKO	7565	section2	0	30	neg
4	36	DazlcKO	7565	section2	2	16	neg
4	21	DazlcKO	7565	section2	0	19	neg
4	59	DazlcKO	7565	section2	1	29	neg
4	65	DazlcKO	7565	section2	2	30	neg
4	60	DazlcKO	7565	section2	3	35	neg
4	62	DazlcKO	7565	section2	2	38	neg
4	28	DazlcKO	7565	section2	0	14	neg
4	73	DazlcKO	7565	section2	0	13	neg
4	43	DazlcKO	7565	section2	0	37	neg
4	52	DazlcKO	7565	section2	0	46	neg
4	66	DazlcKO	7565	section2	0	11	neg
4	33	DazlcKO	7565	section2	1	14	neg
4	61	DazlcKO	7565	section2	0	17	neg
4	39	DazlcKO	7565	section2	2	16	neg
4	11	DazlcKO	7565	section2	3	29	neg
7	4	Dazlcontrol	7568	section2_region3	2	22	pos
7	12	Dazlcontrol	7568	section2_region3	5	27	pos
7	2	Dazlcontrol	7568	section2_region3	13	53	pos
5	7	Dazlcontrol	7568	section2_region1	4	27	pos
5	8	Dazlcontrol	7568	section2_region1	2	21	pos
7	5	Dazlcontrol	7568	section2_region3	2	14	pos
5	5	Dazlcontrol	7568	section2_region1	1	16	pos
7	13	Dazlcontrol	7568	section2_region3	3	31	pos
7	8	Dazlcontrol	7568	section2_region3	7	10	pos
6	4	Dazlcontrol	7568	section2_region2	5	37	pos
6	2	Dazlcontrol	7568	section2_region2	14	30	pos
6	21	Dazlcontrol	7568	section2_region2	1	25	pos
6	24	Dazlcontrol	7568	section2_region2	3	27	pos
6	18	Dazlcontrol	7568	section2_region2	1	16	pos
7	35	Dazlcontrol	7568	section2_region3	2	11	pos
7	14	Dazlcontrol	7568	section2_region3	4	33	pos
6	7	Dazlcontrol	7568	section2_region2	2	21	pos
7	25	Dazlcontrol	7568	section2_region3	5	38	pos
5	2	Dazlcontrol	7568	section2_region1	2	16	pos
6	8	Dazlcontrol	7568	section2_region2	11	23	pos
5	4	Dazlcontrol	7568	section2_region1	2	20	pos
7	10	Dazlcontrol	7568	section2_region3	4	25	pos
6	16	Dazlcontrol	7568	section2_region2	3	23	pos
6	22	Dazlcontrol	7568	section2_region2	0	18	pos
6	6	Dazlcontrol	7568	section2_region2	5	45	pos
7	26	Dazlcontrol	7568	section2_region3	0	21	pos
5	6	Dazlcontrol	7568	section2_region1	1	34	pos
7	29	Dazlcontrol	7568	section2_region3	10	28	pos
6	23	Dazlcontrol	7568	section2_region2	8	21	pos
5	9	Dazlcontrol	7568	section2_region1	3	22	pos
7	6	Dazlcontrol	7568	section2_region3	0	37	pos
7	22	Dazlcontrol	7568	section2_region3	3	42	pos
7	34	Dazlcontrol	7568	section2_region3	1	18	pos
7	30	Dazlcontrol	7568	section2_region3	17	37	pos
7	7	Dazlcontrol	7568	section2_region3	14	26	pos
6	20	Dazlcontrol	7568	section2_region2	12	31	pos
7	24	Dazlcontrol	7568	section2_region3	5	26	pos
7	21	Dazlcontrol	7568	section2_region3	6	14	pos
7	20	Dazlcontrol	7568	section2_region3	2	20	pos
6	5	Dazlcontrol	7568	section2_region2	5	47	pos
7	11	Dazlcontrol	7568	section2_region3	3	37	pos
6	3	Dazlcontrol	7568	section2_region2	6	74	pos
6	10	Dazlcontrol	7568	section2_region2	1	17	pos
6	15	Dazlcontrol	7568	section2_region2	2	20	pos
6	13	Dazlcontrol	7568	section2_region2	5	21	pos
7	28	Dazlcontrol	7568	section2_region3	2	34	pos
7	23	Dazlcontrol	7568	section2_region3	1	28	pos
6	14	Dazlcontrol	7568	section2_region2	4	34	pos
6	9	Dazlcontrol	7568	section2_region2	3	20	pos
7	33	Dazlcontrol	7568	section2_region3	14	15	pos
3	18	Dazlcontrol	7058	section1	2	17	pos
3	4	Dazlcontrol	7058	section1	3	23	pos
3	38	Dazlcontrol	7058	section1	4	5	pos
3	51	Dazlcontrol	7058	section1	3	17	pos
3	62	Dazlcontrol	7058	section1	0	24	pos
3	23	Dazlcontrol	7058	section1	2	18	pos
3	14	Dazlcontrol	7058	section1	14	16	pos
3	28	Dazlcontrol	7058	section1	3	15	pos
3	46	Dazlcontrol	7058	section1	11	22	pos
3	3	Dazlcontrol	7058	section1	2	15	pos
3	33	Dazlcontrol	7058	section1	14	16	pos
3	16	Dazlcontrol	7058	section1	2	10	pos
3	59	Dazlcontrol	7058	section1	2	13	pos
3	9	Dazlcontrol	7058	section1	3	11	pos
3	2	Dazlcontrol	7058	section1	2	12	pos
3	26	Dazlcontrol	7058	section1	3	11	pos
3	36	Dazlcontrol	7058	section1	1	16	pos
3	52	Dazlcontrol	7058	section1	0	7	pos
3	60	Dazlcontrol	7058	section1	0	5	pos
3	43	Dazlcontrol	7058	section1	13	21	pos
3	5	Dazlcontrol	7058	section1	3	20	pos
3	11	Dazlcontrol	7058	section1	1	17	pos
3	8	Dazlcontrol	7058	section1	2	16	pos
3	63	Dazlcontrol	7058	section1	3	16	pos
3	53	Dazlcontrol	7058	section1	10	25	pos
3	25	Dazlcontrol	7058	section1	3	16	pos
3	27	Dazlcontrol	7058	section1	2	22	pos
3	54	Dazlcontrol	7058	section1	6	17	pos
3	61	Dazlcontrol	7058	section1	14	17	pos
3	31	Dazlcontrol	7058	section1	2	18	pos
3	44	Dazlcontrol	7058	section1	2	10	pos
3	50	Dazlcontrol	7058	section1	2	7	pos
3	40	Dazlcontrol	7058	section1	11	19	pos
3	37	Dazlcontrol	7058	section1	1	12	pos
3	34	Dazlcontrol	7058	section1	20	10	pos
3	47	Dazlcontrol	7058	section1	0	8	pos
3	48	Dazlcontrol	7058	section1	1	12	pos
3	13	Dazlcontrol	7058	section1	3	15	pos
3	24	Dazlcontrol	7058	section1	0	9	pos
3	6	Dazlcontrol	7058	section1	0	18	pos
3	22	Dazlcontrol	7058	section1	1	17	pos
3	7	Dazlcontrol	7058	section1	1	13	pos
3	41	Dazlcontrol	7058	section1	12	14	pos
3	58	Dazlcontrol	7058	section1	0	9	pos
3	35	Dazlcontrol	7058	section1	0	9	pos
3	56	Dazlcontrol	7058	section1	0	15	pos
3	30	Dazlcontrol	7058	section1	18	16	pos
3	49	Dazlcontrol	7058	section1	7	9	pos
3	17	Dazlcontrol	7058	section1	2	14	pos
3	29	Dazlcontrol	7058	section1	3	14	pos

## Sheet: SOX9 per area
ImageNumber	ObjectNumber	Metadata_Section	Metadata_Sample	Metadata_Genotype	Metadata_gonia.marker	DAZL_status	SOX9.per.172800.pixels
1	2	section1_region1	7007	DazlcKO	ZBTB16	pos	37.6953
1	12	section1_region1	7007	DazlcKO	ZBTB16	pos	57.0468
3	3	section1_region2.2	7007	DazlcKO	ZBTB16	pos	49.1861
2	15	section1_region2	7007	DazlcKO	ZBTB16	pos	37.1341
1	59	section1_region1	7007	DazlcKO	ZBTB16	pos	45.2217
1	5	section1_region1	7007	DazlcKO	ZBTB16	pos	62.051
1	52	section1_region1	7007	DazlcKO	ZBTB16	pos	64.3291
1	4	section1_region1	7007	DazlcKO	ZBTB16	pos	34.9158
3	7	section1_region2.2	7007	DazlcKO	ZBTB16	pos	38.5846
1	19	section1_region1	7007	DazlcKO	ZBTB16	pos	27.4639
1	21	section1_region1	7007	DazlcKO	ZBTB16	pos	47.7326
1	28	section1_region1	7007	DazlcKO	ZBTB16	pos	25.5415
2	8	section1_region2	7007	DazlcKO	ZBTB16	pos	29.0965
1	64	section1_region1	7007	DazlcKO	ZBTB16	pos	41.3708
3	12	section1_region2.2	7007	DazlcKO	ZBTB16	pos	33.3806
2	13	section1_region2	7007	DazlcKO	ZBTB16	pos	47.3112
2	27	section1_region2	7007	DazlcKO	ZBTB16	pos	26.825
1	17	section1_region1	7007	DazlcKO	ZBTB16	pos	54.6634
2	7	section1_region2	7007	DazlcKO	ZBTB16	pos	37.838
2	25	section1_region2	7007	DazlcKO	ZBTB16	pos	44.2173
2	24	section1_region2	7007	DazlcKO	ZBTB16	pos	65.6648
3	13	section1_region2.2	7007	DazlcKO	ZBTB16	pos	15.6182
1	18	section1_region1	7007	DazlcKO	ZBTB16	pos	33.3557
1	50	section1_region1	7007	DazlcKO	ZBTB16	pos	53.0705
2	23	section1_region2	7007	DazlcKO	ZBTB16	pos	75.1276
7	45	section1_region1	7565	DazlcKO	ZBTB16	pos	36.6699
9	6	section1_region3	7565	DazlcKO	ZBTB16	pos	25.6475
9	9	section1_region3	7565	DazlcKO	ZBTB16	pos	21.126
9	35	section1_region3	7565	DazlcKO	ZBTB16	pos	27.5642
9	40	section1_region3	7565	DazlcKO	ZBTB16	pos	51.0986
7	32	section1_region1	7565	DazlcKO	ZBTB16	pos	37.948
7	52	section1_region1	7565	DazlcKO	ZBTB16	pos	29.624
7	2	section1_region1	7565	DazlcKO	ZBTB16	pos	19.3171
7	34	section1_region1	7565	DazlcKO	ZBTB16	pos	33.6376
9	7	section1_region3	7565	DazlcKO	ZBTB16	pos	29.2759
8	25	section1_region2	7565	DazlcKO	ZBTB16	pos	49.5432
7	43	section1_region1	7565	DazlcKO	ZBTB16	pos	96.1837
9	39	section1_region3	7565	DazlcKO	ZBTB16	pos	32.0663
8	30	section1_region2	7565	DazlcKO	ZBTB16	pos	64.4324
8	15	section1_region2	7565	DazlcKO	ZBTB16	pos	22.2103
8	21	section1_region2	7565	DazlcKO	ZBTB16	pos	46.5145
7	30	section1_region1	7565	DazlcKO	ZBTB16	pos	48.5813
7	9	section1_region1	7565	DazlcKO	ZBTB16	pos	78.5159
7	50	section1_region1	7565	DazlcKO	ZBTB16	pos	40.6931
7	38	section1_region1	7565	DazlcKO	ZBTB16	pos	31.2561
8	2	section1_region2	7565	DazlcKO	ZBTB16	pos	51.0198
7	25	section1_region1	7565	DazlcKO	ZBTB16	pos	42.0908
9	32	section1_region3	7565	DazlcKO	ZBTB16	pos	43.9919
8	8	section1_region2	7565	DazlcKO	ZBTB16	pos	66.2731
7	15	section1_region1	7565	DazlcKO	ZBTB16	pos	35.0632
1	11	section1_region1	7007	DazlcKO	ZBTB16	neg	51.2267
1	8	section1_region1	7007	DazlcKO	ZBTB16	neg	61.9765
1	9	section1_region1	7007	DazlcKO	ZBTB16	neg	32.4948
1	77	section1_region1	7007	DazlcKO	ZBTB16	neg	50.2683
1	65	section1_region1	7007	DazlcKO	ZBTB16	neg	82.9339
3	2	section1_region2.2	7007	DazlcKO	ZBTB16	neg	29.1071
1	10	section1_region1	7007	DazlcKO	ZBTB16	neg	49.1607
2	11	section1_region2	7007	DazlcKO	ZBTB16	neg	56.0771
1	78	section1_region1	7007	DazlcKO	ZBTB16	neg	25.8429
2	12	section1_region2	7007	DazlcKO	ZBTB16	neg	56.9815
1	72	section1_region1	7007	DazlcKO	ZBTB16	neg	39.549
1	73	section1_region1	7007	DazlcKO	ZBTB16	neg	54.7546
2	19	section1_region2	7007	DazlcKO	ZBTB16	neg	29.0975
3	11	section1_region2.2	7007	DazlcKO	ZBTB16	neg	67.9658
1	27	section1_region1	7007	DazlcKO	ZBTB16	neg	47.5158
1	79	section1_region1	7007	DazlcKO	ZBTB16	neg	50.5411
1	45	section1_region1	7007	DazlcKO	ZBTB16	neg	16.226
1	54	section1_region1	7007	DazlcKO	ZBTB16	neg	24.079
1	31	section1_region1	7007	DazlcKO	ZBTB16	neg	30.6609
3	4	section1_region2.2	7007	DazlcKO	ZBTB16	neg	35.7684
2	10	section1_region2	7007	DazlcKO	ZBTB16	neg	42.2506
3	5	section1_region2.2	7007	DazlcKO	ZBTB16	neg	44.0044
2	18	section1_region2	7007	DazlcKO	ZBTB16	neg	72.4885
1	71	section1_region1	7007	DazlcKO	ZBTB16	neg	42.6716
2	6	section1_region2	7007	DazlcKO	ZBTB16	neg	39.4406
8	18	section1_region2	7565	DazlcKO	ZBTB16	neg	24.0131
7	57	section1_region1	7565	DazlcKO	ZBTB16	neg	21.526
9	38	section1_region3	7565	DazlcKO	ZBTB16	neg	37.6549
7	40	section1_region1	7565	DazlcKO	ZBTB16	neg	31.3035
7	58	section1_region1	7565	DazlcKO	ZBTB16	neg	34.5331
7	46	section1_region1	7565	DazlcKO	ZBTB16	neg	69.9369
9	4	section1_region3	7565	DazlcKO	ZBTB16	neg	30.4429
9	44	section1_region3	7565	DazlcKO	ZBTB16	neg	40.322
7	24	section1_region1	7565	DazlcKO	ZBTB16	neg	14.5173
9	3	section1_region3	7565	DazlcKO	ZBTB16	neg	22.6784
7	16	section1_region1	7565	DazlcKO	ZBTB16	neg	26.7168
8	11	section1_region2	7565	DazlcKO	ZBTB16	neg	50.9054
7	27	section1_region1	7565	DazlcKO	ZBTB16	neg	44.1649
7	62	section1_region1	7565	DazlcKO	ZBTB16	neg	69.2906
9	41	section1_region3	7565	DazlcKO	ZBTB16	neg	52.0653
8	22	section1_region2	7565	DazlcKO	ZBTB16	neg	64.6828
8	19	section1_region2	7565	DazlcKO	ZBTB16	neg	55.091
9	42	section1_region3	7565	DazlcKO	ZBTB16	neg	28.916
7	7	section1_region1	7565	DazlcKO	ZBTB16	neg	22.0347
7	3	section1_region1	7565	DazlcKO	ZBTB16	neg	54.651
8	12	section1_region2	7565	DazlcKO	ZBTB16	neg	49.9639
8	13	section1_region2	7565	DazlcKO	ZBTB16	neg	50.7219
7	48	section1_region1	7565	DazlcKO	ZBTB16	neg	33.1205
8	9	section1_region2	7565	DazlcKO	ZBTB16	neg	32.6053
7	54	section1_region1	7565	DazlcKO	ZBTB16	neg	19.8447
11	16	section1_region2	7568	Dazlcontrol	ZBTB16	na	13.3194
11	5	section1_region2	7568	Dazlcontrol	ZBTB16	na	17.3068
11	23	section1_region2	7568	Dazlcontrol	ZBTB16	na	14.2475
12	13	section1_region3	7568	Dazlcontrol	ZBTB16	na	22.9013
11	2	section1_region2	7568	Dazlcontrol	ZBTB16	na	11.9886
11	14	section1_region2	7568	Dazlcontrol	ZBTB16	na	16.2056
11	12	section1_region2	7568	Dazlcontrol	ZBTB16	na	19.6353
11	7	section1_region2	7568	Dazlcontrol	ZBTB16	na	14.648
12	16	section1_region3	7568	Dazlcontrol	ZBTB16	na	26.8766
10	5	section1_region1	7568	Dazlcontrol	ZBTB16	na	13.484
12	11	section1_region3	7568	Dazlcontrol	ZBTB16	na	18.014
12	5	section1_region3	7568	Dazlcontrol	ZBTB16	na	14.0801
11	17	section1_region2	7568	Dazlcontrol	ZBTB16	na	25.7971
12	4	section1_region3	7568	Dazlcontrol	ZBTB16	na	12.9803
10	2	section1_region1	7568	Dazlcontrol	ZBTB16	na	7.68995
12	3	section1_region3	7568	Dazlcontrol	ZBTB16	na	16.4563
11	3	section1_region2	7568	Dazlcontrol	ZBTB16	na	14.9729
10	8	section1_region1	7568	Dazlcontrol	ZBTB16	na	16.0831
12	2	section1_region3	7568	Dazlcontrol	ZBTB16	na	12.2415
10	10	section1_region1	7568	Dazlcontrol	ZBTB16	na	10.7916
12	7	section1_region3	7568	Dazlcontrol	ZBTB16	na	13.2551
11	10	section1_region2	7568	Dazlcontrol	ZBTB16	na	12.023
11	8	section1_region2	7568	Dazlcontrol	ZBTB16	na	18.4575
11	4	section1_region2	7568	Dazlcontrol	ZBTB16	na	14.5508
12	9	section1_region3	7568	Dazlcontrol	ZBTB16	na	16.6402
11	18	section1_region2	7568	Dazlcontrol	ZBTB16	na	17.3825
12	23	section1_region3	7568	Dazlcontrol	ZBTB16	na	16.4471
11	25	section1_region2	7568	Dazlcontrol	ZBTB16	na	16.2864
10	7	section1_region1	7568	Dazlcontrol	ZBTB16	na	16.9193
10	6	section1_region1	7568	Dazlcontrol	ZBTB16	na	11.2131
11	20	section1_region2	7568	Dazlcontrol	ZBTB16	na	25.3064
11	9	section1_region2	7568	Dazlcontrol	ZBTB16	na	10.6358
12	8	section1_region3	7568	Dazlcontrol	ZBTB16	na	24.6477
11	21	section1_region2	7568	Dazlcontrol	ZBTB16	na	11.556
11	15	section1_region2	7568	Dazlcontrol	ZBTB16	na	17.538
12	6	section1_region3	7568	Dazlcontrol	ZBTB16	na	28.9405
12	22	section1_region3	7568	Dazlcontrol	ZBTB16	na	14.771
11	19	section1_region2	7568	Dazlcontrol	ZBTB16	na	19.6894
11	22	section1_region2	7568	Dazlcontrol	ZBTB16	na	15.1741
11	6	section1_region2	7568	Dazlcontrol	ZBTB16	na	17.8567
12	10	section1_region3	7568	Dazlcontrol	ZBTB16	na	15.8657
11	24	section1_region2	7568	Dazlcontrol	ZBTB16	na	13.9154
10	9	section1_region1	7568	Dazlcontrol	ZBTB16	na	12.0366
12	24	section1_region3	7568	Dazlcontrol	ZBTB16	na	13.1417
10	3	section1_region1	7568	Dazlcontrol	ZBTB16	na	10.0222
11	13	section1_region2	7568	Dazlcontrol	ZBTB16	na	9.46044
12	14	section1_region3	7568	Dazlcontrol	ZBTB16	na	16.1368
10	4	section1_region1	7568	Dazlcontrol	ZBTB16	na	23.2255
12	15	section1_region3	7568	Dazlcontrol	ZBTB16	na	17.709
11	11	section1_region2	7568	Dazlcontrol	ZBTB16	na	8.92997
4	41	section1_region1	7058	Dazlcontrol	ZBTB16	na	61.869
6	7	section1_region3	7058	Dazlcontrol	ZBTB16	na	5.45443
6	18	section1_region3	7058	Dazlcontrol	ZBTB16	na	11.2337
4	52	section1_region1	7058	Dazlcontrol	ZBTB16	na	9.82795
6	23	section1_region3	7058	Dazlcontrol	ZBTB16	na	15.819
6	25	section1_region3	7058	Dazlcontrol	ZBTB16	na	15.7796
4	27	section1_region1	7058	Dazlcontrol	ZBTB16	na	11.2253
6	14	section1_region3	7058	Dazlcontrol	ZBTB16	na	6.43372
4	18	section1_region1	7058	Dazlcontrol	ZBTB16	na	10.0688
5	3	section1_region2	7058	Dazlcontrol	ZBTB16	na	8.95096
6	22	section1_region3	7058	Dazlcontrol	ZBTB16	na	16.7359
4	58	section1_region1	7058	Dazlcontrol	ZBTB16	na	13.4154
4	60	section1_region1	7058	Dazlcontrol	ZBTB16	na	12.2622
5	6	section1_region2	7058	Dazlcontrol	ZBTB16	na	7.27242
4	31	section1_region1	7058	Dazlcontrol	ZBTB16	na	10.4202
6	4	section1_region3	7058	Dazlcontrol	ZBTB16	na	11.0149
4	45	section1_region1	7058	Dazlcontrol	ZBTB16	na	33.8452
4	8	section1_region1	7058	Dazlcontrol	ZBTB16	na	9.261
5	4	section1_region2	7058	Dazlcontrol	ZBTB16	na	15.9246
5	8	section1_region2	7058	Dazlcontrol	ZBTB16	na	14.9351
4	34	section1_region1	7058	Dazlcontrol	ZBTB16	na	12.2135
4	2	section1_region1	7058	Dazlcontrol	ZBTB16	na	12.5557
4	3	section1_region1	7058	Dazlcontrol	ZBTB16	na	22.326
4	59	section1_region1	7058	Dazlcontrol	ZBTB16	na	11.4868
4	15	section1_region1	7058	Dazlcontrol	ZBTB16	na	9.80092
6	3	section1_region3	7058	Dazlcontrol	ZBTB16	na	11.6694
6	6	section1_region3	7058	Dazlcontrol	ZBTB16	na	13.0117
4	9	section1_region1	7058	Dazlcontrol	ZBTB16	na	5.26736
4	22	section1_region1	7058	Dazlcontrol	ZBTB16	na	16.4038
6	16	section1_region3	7058	Dazlcontrol	ZBTB16	na	10.8068
6	19	section1_region3	7058	Dazlcontrol	ZBTB16	na	23.7991
4	30	section1_region1	7058	Dazlcontrol	ZBTB16	na	3.23091
6	5	section1_region3	7058	Dazlcontrol	ZBTB16	na	16.0041
6	17	section1_region3	7058	Dazlcontrol	ZBTB16	na	19.3907
4	35	section1_region1	7058	Dazlcontrol	ZBTB16	na	8.07703
4	16	section1_region1	7058	Dazlcontrol	ZBTB16	na	8.89816
6	15	section1_region3	7058	Dazlcontrol	ZBTB16	na	8.91854
4	14	section1_region1	7058	Dazlcontrol	ZBTB16	na	7.76455
4	57	section1_region1	7058	Dazlcontrol	ZBTB16	na	12.9463
6	13	section1_region3	7058	Dazlcontrol	ZBTB16	na	14.0444
6	10	section1_region3	7058	Dazlcontrol	ZBTB16	na	16.6187
4	29	section1_region1	7058	Dazlcontrol	ZBTB16	na	2.39085
4	65	section1_region1	7058	Dazlcontrol	ZBTB16	na	13.1511
4	56	section1_region1	7058	Dazlcontrol	ZBTB16	na	40.8269
6	24	section1_region3	7058	Dazlcontrol	ZBTB16	na	17.9101
4	6	section1_region1	7058	Dazlcontrol	ZBTB16	na	12.2956
4	13	section1_region1	7058	Dazlcontrol	ZBTB16	na	8.17403
4	5	section1_region1	7058	Dazlcontrol	ZBTB16	na	14.1885
4	49	section1_region1	7058	Dazlcontrol	ZBTB16	na	13.4268
4	11	section1_region1	7058	Dazlcontrol	ZBTB16	na	10.961
