# Supplementary material for: DAZL mediates a broad translational program regulating expansion and differentiation of spermatogonial progenitors
Source: eLife journal article supplement (doi:10.7554/elife.56523), 2020-07-20
Supplement: supp [file elife-56523-supp-v1.zip › elife_poa_e56523_Figure_2_source_data_1.xlsx]

## Sheet: Description
Figure 2 - source data 1
Tab Name	Description
counts	Pseudoaligned read counts, rounded to nearest integer, for Pdx1:GFP-positive undifferentiated spermatogonia and Pdx1:GFP-negative undifferentiated spermatogonia from 6-8 week old adult testes (La et al., 2018); KIT-positive, Pou5f1:EGFP-positive differentiating spermatogonia from P7 testes (Kubo et al., 2015); KIT-positive differentiating spermatogonia from P7 testes (Maezawa et al., 2017), and 3…
TPMs	TPMs for Pdx1:GFP-positive undifferentiated spermatogonia and Pdx1:GFP-negative undifferentiated spermatogonia from 6-8 week old adult testes (La et al., 2018); KIT-positive, Pou5f1:EGFP-positive differentiating spermatogonia from P7 testes (Kubo et al., 2015); KIT-positive differentiating spermatogonia from P7 testes (Maezawa et al., 2017), and 3S undifferentiated spermatogonia from this study. …

## Sheet: counts
gene.id	PDX1.GFP.neg.1	PDX1.GFP.neg.2	PDX1.GFP.neg.3	PDX1.GFP.neg.4	PDX1.GFP.pos.1	PDX1.GFP.pos.2	PDX1.GFP.pos.3	PDX1.GFP.pos.4	KIT.pos.1	KIT.pos.2	KIT.pos.Pou5f1.GFP.pos.1	KIT.pos.Pou5f1.GFP.pos.2	3S.gonia.1	3S.gonia.2
0610005C13Rik	3	0	0	2	1	18	3	0	3	5	0	7	0	1
0610009B22Rik	215	307	197	231	201	235	388	180	207	155	645.233	551	27	36
0610009E02Rik	12	15	13	19	22.3312	21	33.8952	1	2	0	248.733	130.399	1	2
0610009L18Rik	13	13	13	11	1	6	5	2	8	6	58	61	7	10
0610010B08Rik	149.589	190.99	307.466	170.738	355.443	151.448	354.048	422.941	114.243	133.558	2399.65	1718.95	324.912	186.077
0610010F05Rik	465	503	601.001	593	559	339	594	523	318	227	3318	3144	132	208.001
0610010K14Rik	1180	1208	1432	1441	1001	1187	1420	1107	301	198	6966	4884	255	439
0610012G03Rik	178.208	216.107	222.901	296.983	211.891	216.469	210.209	183.798	176.865	113.94	1548.67	1242.45	95.9369	107.24
0610030E20Rik	690.789	655.495	748.061	607.493	600.542	736.844	631.95	578.022	603.132	544.212	2651.51	3049.67	128.55	171.786
0610031O16Rik	0	0	1	0	0	0	0	0	1	0	2	0	0	0
0610037L13Rik	669	580	579	572	435	400	753	544	254	219	1734	1547	78	111
0610038B21Rik	168.515	107.586	94.1804	140.07	126.214	66.9415	58.8707	55.6302	17.457	16.2807	121.09	153.715	21	25
0610039H22Rik	19	2	11	12	26	1	8	9	5	1	0	0	5	8
0610039K10Rik	12	27	6	7	13	8	10.0253	18	3	18	23	21	4	10
0610040B10Rik	10	3	4	5	6	1	17	5	1	0	31	45	4	0
0610040F04Rik	18	19	10.4428	17.2047	28	19	33.6904	23.5162	10.0589	21.513	14	1.00627	1.11199	2
0610040J01Rik	0	7	0	2	6	3	0	2	14	1	24	19	1	0
0610043K17Rik	32	6	20	20	45	69	11	15	0	3	0	5	2	2
1010001N08Rik	1.59857	2.9448	0	0	0	0	0	0	1.29599	2.94202	3.22036	68.1607	0	0
1110002J07Rik	103.212	102.738	70.4508	110.409	158.098	167.475	137.481	140.293	75.1327	43.6731	19.8014	76.8571	4.71324	1.19419
1110002L01Rik	81.0089	91.5432	115.07	121.232	87.5421	158.407	114.498	143.596	63.1123	41.8949	746.552	676.443	50.2878	63.0803
1110004F10Rik	707	799	784	900	639	839	1039	612	623	442	6793	5751	205	384
1110006O24Rik	40	49	12	30	23	1	33	29	11	12	162	119	5	15
1110008L16Rik	1723	1518.89	1555.42	1683.73	2013.75	1668.68	1723	1927	550.615	484	2911.33	2723	207	322
1110008P14Rik	568	563	551	544	301	309	514	274	315	238	2215	1426	104	137
1110012L19Rik	115	146	91	113	196	175	258	65	73	37	1019	791	58.7538	107.604
1110015O18Rik	0	0	0	0	0	0	0	0	0	0	0	1	0	0
1110017D15Rik	16	20	21	3	11	0	10	3	1	1	8	12	0	0
1110019D14Rik	47	42	61	92	45	56	58	78	14	10	179	142	13	10
1110020A21Rik	9	35	27	41	61	1	46	50	10	12	35	21	2	13
1110025L11Rik	0	0	0	0	0	0	0	0	0	0	0	0	0	0
1110028F11Rik	0	7	0	0	8.73372	2	0	0	2	2	1	0	2	6
1110028F18Rik	2	8.42425	14.247	5	9	0	12	19.2256	0	1	1	8	0	1
1110032A03Rik	382.428	314.267	420.302	385.893	581.749	607.785	453.746	573.688	532.517	353.912	727.814	638.1	49.5893	75.6237
1110032F04Rik	4	0	18	14	4	0	1	5	0	6	141	219	6	6
1110036E04Rik	6	7	2	1	1	5	12	0	3	2	2	1	0	0
1110038B12Rik	389	442	461	453	151	308	322	224	195	167	846	874	51	81
1110038F14Rik	350	356	338	269	188	172	384	135	108	60	1901.01	1565	84	163
1110046J04Rik	68.6482	58.775	96.2398	105.031	114.849	83.0473	143.138	111.842	27.563	30.7108	35.0501	97.176	7.69251	7.50612
1110051M20Rik	237.186	285.549	357.955	259.513	480.27	498.042	360.151	278.766	225.688	166.764	2550.95	2148.22	120.369	216.101
1110058D11Rik	10	14.0152	30	20	23	0	38	15.0404	7	1	0	0	2	6
1110059E24Rik	628	797	627	567	618	456	742	610	476	274	2225	1827	132.911	224.765
1110059G10Rik	155	193.382	202.205	132.313	134.5	253.339	225.367	185.248	101.128	56.0242	1564.34	1212.35	34.3564	63.5278
1110065P20Rik	90.2274	110.453	104.183	101.201	95.9087	84.3393	125.389	27	81.2128	54.226	1225.75	1375.83	49	82
1190002N15Rik	676	599	577	827	1079	943	783	833	725	474	9058	7228	226	336
1190005I06Rik	0	0	0	0	0	0	0	0	3	0	8.59286	3.00072	0	0
1190007I07Rik	113.233	65.163	93.7674	79.5758	69.3006	86.7164	88.5714	56.4122	18.2295	23.8035	626.168	508.475	23.4373	31.4075
1190028D05Rik	71	83	56	94	128	111	147	98	11	6	31	79	6	12
1300002E11Rik	910.826	773.005	891.511	909.523	577.931	523.045	656.838	670.453	527.121	404.453	478.277	488.477	83.6202	106.861
1300017J02Rik	18	47	28	23	16	29	22	13	4	0	139	122	7	20
1500004A13Rik	529.538	461.363	507.288	650.834	829.259	741.357	705.706	633.769	236.276	245.69	2310.66	1711.12	81.48	145.925
1500009C09Rik	0	0	0	0	2	4	1	0	0	0	6	2	0	1
1500009L16Rik	333	194	250	422	648	465	969	864	529	314	497	876	30	65
1500011B03Rik	402.549	381.009	400.239	440.945	230.847	279.376	388.59	324.684	94.9573	50	1746.74	1391.84	48	96
1500011K16Rik	56	40	78	71	75	41	117	63	40	24	158	275	7	8
1500012K07Rik	48.4043	62.8616	54.6087	64.0595	119.078	80.3962	91.4052	107.145	22.3348	27.3102	27.5824	95.2718	12.6034	11.2986
1500015A07Rik	127	188	256	207	129	158	180	120	92	65	1978	1238	57	89
1500015L24Rik	4	3	7	10	0	0	2	0	0	1	1	0	1	3
1500015O10Rik	5	1	4	2	9	0	0	4	20	4	3	26	0	0
1500026H17Rik	361	371	418	385	526	376.845	506	578	82	50	123	564	15.5002	30
1600002D24Rik	0	6	0	0	2	0	0	0	1	0	0	6	0	0
1600002K03Rik	15	35	23	17	19	14	21	0	14	3	335	251	9	15
1600010M07Rik	5.09447	12.1538	12	7.09891	6.05883	3.04279	21.2074	30.8626	1.09455	0	2.00964	7	1	2
1600012H06Rik	482.893	397.442	625.091	682.734	462.041	470.157	384.146	471.493	542.602	350.929	3639.28	3102.95	101.947	166.344
1600014C10Rik	37	60	36	36	29	22	24	27	222	174	353	576	18	19
1600014C23Rik	2	0	0	0	1	0	0	0	3	0	3	4	0	0
1600015I10Rik	0	0	0	0	0	0	0	0	0	3	1	1	0	0
1600019K03Rik	0	0	0	0	0	0	1	0	0	0	0	0	0	0
1600020E01Rik	146	126	122	91	156	158	211	127	28	14	400	289	28	51
1600023N17Rik	53	57	33	44	8	35	26	12	21	4	118	72	4	10
1600025M17Rik	0	0	0	0	7	0	1	0	0	0	0	0	1	0
1600027J07Rik	0	0	0	0	0	0	0	0	0	0	0	0	0	0
1600029I14Rik	5	1	4	0	0	0	0	0	5	0	1	4	3	1
1600029O15Rik	117.875	125.643	134.68	146.883	213.675	139.287	143.769	176.778	42.332	52.017	436.833	113.5	7.01619	8.39792
1700001C02Rik	3	0	0	3	0	0	3	0	0	0	0	1	0	0
1700001C19Rik	57.0075	80.0081	113.027	85.0152	101.017	160.061	95.1572	78.0319	33	11	166.207	94.0014	28.0057	31
1700001D01Rik	2	1	10	1	1	0	1	0	3	5	0	1	1	0
1700001F09Rik	18.8666	9.3003	23.4353	7.52962	97.0945	50.0576	76.85	8.63929	7.75146	0	0	0	2.04132	0
1700001G01Rik	1.00574	0	0	0	4	0	0	0	0	0	0	0	0	0
1700001G11Rik	3	9	4	0	11	11	0	16	1	0	27	20	1	1
1700001G17Rik	16	8	2	6	4	0	6	3	0	0	22	20	0	2
1700001J03Rik	6	5	3	1	7	0	0	16	0	0	15	11	1	3
1700001J11Rik	23.2738	17.6586	22.3696	10.2726	19.6759	4.36013	61.2526	28.2905	10.7129	7.88392	29.9559	35.1923	0	0
1700001K19Rik	4	1	5	7	10	15	7	0	4	7	15	25	1	0
1700001K23Rik	2	0	3	3	12	3	2	1	1	1	0	1	0	0
1700001L05Rik	1515	1743	1758	1820	1412	1795	1669	1423	823	555	12520	12073	234	419
1700001L19Rik	56	71	52	43	59	15	103	17	32	8	93	61	7	10
1700001O22Rik	7	1	11	5	8	13	9	14	5	8	38	32	2	1
1700001P01Rik	2	3	1	3	8	3	5	0	3	4	6	4	0	0
1700003C15Rik	0	1	1	1	0	0	0	0	0	0	0	0	0	0
1700003D09Rik	1	1	3	8	0	0	4	0	1	3	21.9157	18.0185	0	0
1700003E16Rik	3	4	9	8	20	9	51	2	3	4	58	68	9	9
1700003E24Rik	6.9748	0	0	1.92789	4.90193	0.3625	0	0	0	0	25.391	3.21762	0	0
1700003F12Rik	8	14	13	0	8	0	4	0	2	1	20	14	0	1
1700003G13Rik	0	0	0	0	0	0	0	0	0	0	0	0	0	0
1700003G18Rik	10	2	4	3	12	13	14	8	2	1	19	7	1	5
1700003H04Rik	3	0	0	0	0	0	0	0	0	0	0	0	0	0
1700003I22Rik	0	0	1	0	0	0	0	0	0	0	0	0	0	0
1700003L19Rik	0	0	0	0	0	0	4	0	0	0	0	0	0	0
1700003M07Rik	63.9233	95.5	73.92	89.297	189.681	111.378	104.072	165.581	198.615	127.571	129.582	123.324	38.2082	58.4117
1700003P14Rik	2	6	4	0	1	0	2	0	0	0	0	0	0	0
1700006A11Rik	3	12	29	22.9999	0	26	3	0	0	0	5	1	0	0
1700006F04Rik	0	0	0	0	0	0	0	0	0	0	0	0	0	0
1700006H21Rik	0	0	0	0	0	1	3	0	0	0	8	4	2	0
1700007F19Rik	7	5	0	4	4	12	17	8	2	0	1	4	0	1
1700007J10Rik	76.9901	80.7647	77.2502	87.9755	131.385	137.669	161.351	94.7099	69.1719	40.3298	197.42	61.9197	119.536	126.248
1700007K13Rik	14	11	12	8	38	9	13	9	22	18	39	30	2	4
1700007L15Rik	43	42	27	46	56	6	42	22	49	8	217	202	4	10
1700007P06Rik	49	38	48	44	95	35	71	99	21	3	5	40	1	4
1700008C04Rik	21.7485	28.1979	31.1581	39.3276	57.6293	60.5904	25.2965	26.4468	11.2122	9	11.9792	8	6	4.07733
1700008J07Rik	212.263	157.076	208.574	170.697	144.566	249.133	196.836	109.923	201.274	135.26	905.342	680.938	46.4259	88.0815
1700008K24Rik	7	20	35.9999	28	6	14	47	2	0	0	5	0	0	0
1700008O03Rik	10	9	28	9	16	4	5	23	0	3	47	28	9	2
1700008P02Rik	0	0	0	0	0	0	0	0	0	0	0	0	0	0
1700009C05Rik	0	0	7	2	0	7	1	0	0	0	1	1	0	0
1700009J07Rik	2	0	0	0	0	4	0	0	0	0	0	0	0	0
1700009N14Rik	9	9	16	8	19	24	13	3	0	0	1	0	0	0
1700010B08Rik	9	13	19	21	20	13	25	25	6	0	16	17	0	4
1700010D01Rik	1	0	0	0	2	0	1	1	2.84273	3.88356	11.9269	12.4397	0.573962	1
1700010I02Rik	117.387	71.5453	94.2195	114.865	181.227	180.057	135.799	237.178	25.1963	10.7969	21.4772	78.5442	1.48266	0
1700010I14Rik	6	22	23	25	84	24	114	43	0	2	32	38	3	7
1700010J16Rik	0	0	0	3	0	4	0	0	0	0	0	1	0	0
1700010K23Rik	0	0	0	0	0	0	0	0	0	0	0	0	0	0
1700010N08Rik	239.535	198.329	174.482	279.809	351.874	203.782	346.574	220.657	19.3872	21.3243	238.931	323.733	47.7098	47.9896
1700011B04Rik	11	1	1	3	13	7	50	2	2	1	6	3	2	1
1700011C11Rik	0	0	0	0	0	0	3	0	0	0	0	0	0	0
1700011L22Rik	2	1	2	3	5	1	6	12	0	0	1	0	0	0
1700011M02Rik	2	0	8	0	0	0	3	0	0	0	6.7066	25	0	3
1700012A03Rik	9	9	0	0	0	0	0	0	0	0	0	0	0	0
1700012B07Rik	89	56	78	85	120	112	173	82	7	5	206	129	19	27
1700012B09Rik	9	3	3	7	7	17	15	0	5	0	8	3	0	0
1700012C14Rik	1	3	3	1	2	2	9	0	1	0	8	10	1	4
1700012D01Rik	83	90	119	63	23	18	42	14	6	6	111	79	34	45
1700012D14Rik	10	11	8	10	25	13	23	16	5	13	37	89	1	4
1700012D16Rik	2	6	1	8	3	2	5	15	0	0	0	1	1	2
1700012H19Rik	0	0	0	0	0	0	0	0	0	0	0	0	0	0
1700012I11Rik	0	0	0	0	0	0	0	0	0	0	0	0	0	0
1700012P22Rik	9	0	1	3	5	0	21	0	0	0	0	0	1	1
1700013D24Rik	0	0	0	1	0	2	5	0	0	0	0	0	0	0
1700013F07Rik	1	1	0	3	1	0	21	1	1	0	11	4	3	4
1700013G24Rik	65	13	13	5	37	78	57	1	0	0	1	0	0	0
1700013H16Rik	44	37	57	44	23	42	32	21	69	35	2930	2139	59	75
1700015F17Rik	20	18	15	8	2	14	45	0	2	0	15	3	0	3
1700015G11Rik	1	0	2	1	6	0	1	9	4	0	1	0	0	0
1700016A09Rik	18.5942	26	16.7473	16	6.37823	1	27.6411	2	2	0	28.1271	51.1762	6	10
1700016C15Rik	0	1	0	0	0	0	0	1	2	0	0	0	0	0
1700016D06Rik	196.879	202.652	163.57	244.144	286.796	204.117	323.875	270.159	64.9224	65.2008	94.0263	148.27	19.3723	17.4008
1700016G22Rik	0	2	0	0	0	0	0	0	2	0	1	0	0	0
1700016H13Rik	5	5	8	4	1	6	0	1	3	0	9	6	0	0
1700016K05Rik	0	0	0	0	5	0	0	1	3	0	0	0	0	0
1700016K19Rik	164	209	185	225	226	122	240	87	59	33	448	317	32	41
1700016L04Rik	14	13	30	18	23	5	19	11	6	0	33	41	7	6
1700016L21Rik	0	0	0	0	0	0	0	0	0	0	0	0	0	0
1700016P04Rik	0	0	0	0	0	1	0	0	0	0	0	0	0	0
1700017B05Rik	891	529	814	1220	1479	1368	1908	1708	898	578	2751	6570	200	308
1700017D01Rik	10	13	8	11	28	7	19	10	2	2	12	7	1	1
1700017G19Rik	4	2	3	0	1	0	4	0	0	0	2	1	0	0
1700017J07Rik	4	1	0	0	0	0	2	0	0	0	0	0	0	0
1700017L05Rik	0	3	1	1	0	0	0	0	0	0	0	0	0	0
1700017N19Rik	3	3	3	10	1	10	4	11	0	0	3	6	0	0
1700018A04Rik	0	1	2	1	0	13	7	0	1	1	2	0	0	0
1700018B08Rik	10	19	12	10	6	8	25	0	0	0	95	63	3	4
1700018B24Rik	559	470	453	558	573	420	442	525	158	88	2247	1635	63	97.4908
1700018F24Rik	0	0	0	0	0	0	3	0	1	0	2.93561	1.98245	0	0
1700018G05Rik	5	2	1	0	0	0	0	14	0	0	1	9	0	1
1700018L02Rik	6.11811	1.04857	14	14.5203	0	3	24.8037	15	14.1674	9.12661	10.0409	38.1774	2	1
1700019A02Rik	28	20	18	27	60	83	35	33	5	2	98	72	3	9
1700019C18Rik	14	24	26	28	18	19	24	18	2	1	60	36	2	11
1700019D03Rik	18	12	9	12	3	38	8	9	11	0	24	34	0	1
1700019E08Rik	33	24	33	51	49	19	26	36	2	6	44	63	4	8
1700019G24Rik	0	0	0	1	3	0	2	3	0	0	6	1	0	0
1700019M22Rik	1	2	0	0	6	14	19	0	0	0	1	0	0	0
1700019N19Rik	17	10	2	5	0	1	9	0	0	2	4	1	2	1
1700019P21Rik	0	0	0	0	0	0	0	0	0	0	0	0	0	0
1700020A23Rik	0	3	0	0	3	2	0	0	0	3	9	15	3	1
1700020D05Rik	7	8	11	17	6	11	51	1	24	6	220	148	4.25458	0
1700020D14Rik	0	0.5	0	0	0	0	0	0	0	0	0	0	0	0
1700020G17Rik	3	10	5	8	16	5	18	4	7	13	0	0	0	1
1700020I14Rik	625	723	780	719	589	415	754	370	635	425	4988	5038	184	263
1700020L24Rik	3	0	9	0	10	2	4.87418	0	2.65337	0	5.09505	18.1421	0	0
1700020M21Rik	0	1	4	1	4	2	4	1	0	0	3	9	0	1
1700020N01Rik	114	83	66	109	82	40	83	39	14	7	196	108	16	33
1700020N15Rik	0	0	0	0	0	9	5	0	0	0	5.87269	2	0	0
1700020N18Rik	0	0	0	1	0	0	0	0	0	0	0	1	0	0
1700021F02Rik	0	0	0	0	3	0	4	0	0	0	0	0	0	0
1700021F05Rik	294	332	313	284	299	324	487	192	130	149	1217	817	88	141
1700021F07Rik	12	54	22	13	30	40	65	0	0	8	29	12	4	8
1700021N21Rik	1	0	0	0	0	0	0	0	0	0	0	2	0	0
1700022A21Rik	7	0	0	0	0	2	5	0	0	0	0	0	0	0
1700022A22Rik	0	0	0	0	0	0	1	0	0	0	0	0	0	0
1700022E09Rik	0	0	0	0	2	0	0	0	0	0	0	1	0	0
1700022H01Rik	3	1	0	0	0	11	2	0	1	4	9	10	1	1
1700022H16Rik	0	0	0	0	0	0	0	0	0	0	0	0	0	0
1700022I11Rik	1	8	2	20	3	0	35	0	37	42	19	8	1	3
1700023C21Rik	4	1	1	0	2	4	0	0	0	0	1	0	1	0
1700023D09Rik	24.7656	6.61081	13.3151	14.5607	24.0508	24.2417	19.4134	16.4768	2.56388	2.47698	106.039	86.325	4.19109	2.13995
1700023F02Rik	0	0	0	0	0	0	0	0	0	0	0	0	0	0
1700023F06Rik	3	4	1	0	0	5	24	1	1	0	50	52	1	3
1700024B18Rik	0	1	0	2	0	0	5	0	0	0	0	0	0	0
1700024F13Rik	47	78	86	53	32	68	55	28	6	6	104	97	7	16
1700024G13Rik	2	0	0	1	5	0	3	2	0	0	0	0	1	1
1700024I08Rik	5	1	0	0	0	0	1	3	0	0	2	0	1	1
1700024N05Rik	0	0	0	2	0	0	0	0	0	0	0	0	0	0
1700024P04Rik	0	0	2	0	0	3	0	0	0	0	0	2	0	0
1700025B11Rik	1	0	0	0	1	2	8	0	0	0	0	0	0	0
1700025C18Rik	4	0	1	3	1	1	1	4	6	0	0	0	0	0
1700025F22Rik	0	0	0	0	0	0	1	0	0	1	0	0	0	0
1700025F24Rik	13	1	17	3	4	25	18	12	0	0	12	8	4	7
1700025G04Rik	423.343	459.739	385.235	319.95	342.931	365.678	308.897	421.1	1306.89	1187.21	1846.73	2431.33	81.3665	148.757
1700025J12Rik	0	0	0	0	1	0	0	10	0	0	2	0	0	1
1700025K24Rik	11	15	32	17	19	27	25	11	4	1	0	2	0	2
1700025M24Rik	2	0	4	2	2	2	0	0	0	0	0	2	0	0
1700025N23Rik	92.5554	128.879	153.554	149.154	224.831	128.676	201.899	142.325	43.4286	54.3177	25.0594	47.1419	5.66845	9.10889
1700026D11Rik	7	23	22	8	50	11.3444	2	6	4	1	1	3	3	2.59165
1700026F02Rik	1	0	0	0	1	0	0	4	0	0	0	0	0	0
1700026J14Rik	0	3	0	2	0	10	2	0	0	1	12	9	0	3
1700027A15Rik	7	7	2	1	6	35	4	11	0	0	0	0	0	0
1700027F06Rik	0	0	0	0	0	0	1	0	0	0	0	0	0	0
1700027F09Rik	1	0	0	0	0	0	0	0	0	0	0	0	0	0
1700027H10Rik	0	0	0	0	0	0	0	0	0	0	0	0	0	0
1700027I24Rik	4	1	0	0	0	0	0	1	5	6	5	2	0	0
1700027J07Rik	0	1	0	0	0	1	0	0	0	0	0	0	0	0
1700028B04Rik	0	0	0	0	0	0	1	0	0	0	0	2	0	0
1700028D13Rik	83	62	84	68	152	105	86	69	38	43	35	62	11	9
1700028E10Rik	198	242	230	300	530	384	419	376	68	41	388	430	43	55
1700028I16Rik	35	36	20	71	0	17	31	66	7	1	246	168	10	18
1700028J19Rik	19	49	19	14	12	19	38	40	4	2	87	70	3	3
1700028K03Rik	195.888	300.131	290.164	278.859	519.828	431.521	449.836	296.604	160.385	90.6017	821.53	474.359	33.9684	54.8431
1700028M03Rik	0	0	0	0	0	3	0	0	0	0	0	0	0	0
1700028P14Rik	3	1	6	0	2	27	45	0	0	0	1	2	0	1
1700028P15Rik	38	19	33	30	161	24	132	42	0	3	16	13	1	1
1700029B22Rik	11	6	4	10	0	20	6	19	4	1	0	0	0	1
1700029F12Rik	56	53	31	40	80	50	85	8	1	3	4	5	0	1
1700029H14Rik	25	9	20	21	34	18	26	1	9	5	3	3	2	6
1700029I15Rik	17	31	15	19	15	3	39	7	7	9	14	20	0	0
1700029J03Rik	2	0	3	1	0	0	0	0	0	0	0	0	1	3
1700029J07Rik	143.32	211.031	239.436	162.158	255.312	125.062	138.147	131.258	43.0206	19.0646	434.231	357.357	67.6206	76.4927
1700029M20Rik	108	99	93	60	63	88	48	45	5	4	242	173	22	39
1700029N11Rik	0	0	0	0	0	0	0	0	0	0	0	0	0	0
1700029P11Rik	195	215	218	258	22	95	72	88	37	7	386	223	17	31
1700030A11Rik	0	0	0	0	1	0	1	0	0	0	1	0	0	0
1700030C10Rik	107.036	106	52.5321	130.569	115.919	126.099	118.422	165.039	58.6838	29.2814	849.77	700.673	43.6391	70.5259
1700030C14Rik	4.00251	2.0008	1.00034	1.61627	5.00921	21.9604	5.00916	6.74988	8.49197	6.87137	1.01889	0	0.140853	0
1700030F04Rik	16.3828	7.22259	10.8487	8.21952	2.74921	16.3302	1.18076	10.2769	0	0	3.3727	0	0	2.22734
1700030F18Rik	0	0	0	0	0	0	0	0	3	0	3	1	0	0
1700030J22Rik	299	300	432	401	394	259	477	289	167	145	1265	1050	67	122
1700030K09Rik	182	131	76	128	66	65	96	39	68	61	874	923	50	62
1700030L20Rik	19.0571	14.6669	18.423	24.2578	38.6887	32.8816	36.9112	36.8729	26.4606	23.8757	26.7475	46.4346	4.72019	11.8496
1700030M09Rik	4	1	0	0	0	0	1	0	0	0	6	0	0	1
1700030N03Rik	2	1	0	0	1.08989	0	0	0	0	0	0	0	1	0
1700030O20Rik	0	0.151506	0	5.21418	4.2891	0	7.05537	0	0	0	1	0	0	0
1700031A10Rik	0	3	0	0	6	2	0	0	0	0	0	3	0	1
1700031F05Rik	0	0	0	1	0	0	0	2	4	0	154.742	46	0	0
1700031L13Rik	0	1	0	0	0	0	1	0	0	0	0	0	0	0
1700031M16Rik	4	1	2	5	2	22	2	8	0	0	0	0	1	0
1700031P21Rik	0	0	0	0	0	0	1	0	0	0	0	0	0	0
1700034E13Rik	5	0	3	0	0	8	0	1	0	0	0	0	0	0
1700034G24Rik	0	3	1	0	6	12	1	4	0	0	1	0	0	3
1700034H15Rik	472.008	447.125	450.148	470.352	867.204	638.174	709.867	684.888	213.712	171.833	415.566	592.374	68.2728	79.4148
1700034I23Rik	41.7617	13	19.2164	9.45811	19	18.0093	19.3921	28.9814	0	0	8.00606	5	0	5
1700034J05Rik	39	46	61	72	188	29	133	41	5	6	0	2	8	10
1700034K08Rik	1	4	0	2	6	4	0	0	2	0	0	4	2	0
1700034P13Rik	139.517	143.303	76.5661	102.91	40.3444	118.819	149.544	36.6087	8.38745	3.82138	93.3612	218.696	28.9769	28.5201
1700036G14Rik	0	0	0	0	2	0	0	1	0	0	0	0	0	0
1700037C18Rik	6	18.0305	7.3374	13	1	1	16	1	5	3	53.6098	68.5841	7	9
1700037H04Rik	654	806	1117	1001	378	426	468	368	611	309	6329	5242	171	296
1700039E22Rik	0	0	0	0	0	0	0	0	0	0	1	2	0	0
1700039M10Rik	1	0	1	0	0	1	1	0	0	3	9	5	3	1
1700040D17Rik	49	42	45	46	34	26	52	44	11	10	164	126	2	7
1700041A01Rik	0	0	0	2.49057	0	0	1.20085	0	0	0	0	0	0	0
1700041C23Rik	0	1	0	2	0	0	7	0	0	0	0	0	0	0
1700041M19Rik	3	0	0	0	5	0	3	0	0	0	0	0	0	0
1700042G07Rik	0	0	0	0	0	1	1	0	0	0	0	0	0	0
1700042G15Rik	9	17	22	11	5.02725	6	8.03881	3	2	0	2	2	2	1
1700042O10Rik	3	3	18	10	0	0	0	0	1	7	5	6	5	8
1700044C05Rik	0	0	0	0	1	0	1	0	0	0	0	0	0	0
1700044K03Rik	0	0	0	1	0	0	0	1	0	0	0	0	0	0
1700045H11Rik	0	0	0	0	0	0	0	0	0	0	3	1	0	0
1700046C09Rik	0	0	0	0	0	0	0	0	0	0	0	0	0	0
1700047A11Rik	17.7607	10.2998	21	16.7804	14.5223	17.7193	17.1932	22.256	3	0	1.00456	3	0	0
1700047E10Rik	55.2737	146.702	93.1925	61.0661	43.5943	103.185	122.243	50.5542	32.8705	34.4842	865.376	264.746	4.49259	1.66101
1700047G03Rik	2	6	10	0	7	4	8	7	1	3	1	0	0	0
1700047I17Rik2	434.902	642.396	732.071	503.006	418.857	733.174	787.835	477.272	1226.32	736.319	4934.56	3340.69	133.76	226.29
1700047L14Rik	74	67	93	85	131	109	92	107	9	3	7	8	5	2
1700047M11Rik	6	3	2	0	1	0	15	5	2	0	6	3	2	0
1700048M11Rik	0	1	0	2	2	0	0	0	0	0	3	8	0	0
1700048O20Rik	448.099	498.965	457.328	495.997	710.62	615.593	603.024	553.005	140.997	85.3712	1588.08	1234.91	54.0437	57.6521
1700049E15Rik	1	9	4	4	0	0	3	1	0	1	0	0	0	1
1700049E17Rik1	40.4662	195.883	183.736	29.5279	71.7892	110.361	168.409	48.1245	29.3213	17.7013	1267.57	946.02	68.0436	85.8073
1700049E17Rik2	40.4662	195.883	183.736	29.5279	71.7892	110.361	168.409	48.1245	29.3213	17.7013	1267.57	946.02	68.0436	85.8073
1700049E22Rik	0	0	0	0	0	0	2	0	0	0	2	4	1	0
1700049L16Rik	15.7505	5	0	6	4	0	7	1.12245	0	0	0	0	0	0
1700051A21Rik	16.4289	22.7061	14.6851	32.308	14.4405	18.2405	49.7313	7.93476	81.1709	49.1709	4.09949	11.82	3.29133	5.07866
1700052I22Rik	1	4	0	0	0	0	0	0	0	0	0	0	0	0
1700052K11Rik	100.372	98.8811	63.4994	99.1325	66.0764	73.7689	86.1073	70.003	63.1335	42.3352	498.441	435.342	23.5018	51.8079
1700054A03Rik	0	0	0	0	0	0	1	0	0	0	0	0	0	0
1700054K19Rik	1	0	0	1	0	0	4	0	0	0	0	0	0	0
1700054M17Rik	0	0	0	0	0	0	1	0	0	0	0	0	0	0
1700055C04Rik	0	0	0	0	0	1	0	0	0	0	0	0	0	0
1700055D16Rik	60.9615	72.2181	58.1653	49.5408	74.7692	41.0564	74.7456	59.4483	61.0945	39.0403	75.3176	88.8069	7.0968	9.0985
1700056E22Rik	14	11	33	10	0	12	8	4	7	8	19	22	4	5
1700057G04Rik	3	0	1	5	0	0	10	5	0	2	38	7	0	1
1700057H15Rik	1	4	0	2	5	0	0	0	2	0	1	3	0	0
1700057H21Rik	0	3	1	0	3	3	1	0	0	0	1	2	0	0
1700060C16Rik	0	0	0	1	0	0	0	0	0	0	0	1	0	0
1700060C20Rik	0	1	2	0	0	0	4	0	2	0	0	2	0	0
1700061F12Rik	0	0	0	0	0	0	0	0	0	0	0	0	0	0
1700061G19Rik	43	17	30	45	48	22	75	15	53	40	62	67	2	4
1700061I17Rik	0	0	1	1	0	1	0	0	0	0	0	0	0	0
1700061J23Rik	0	1	0	0	0	1	0	0	1	0	0	0	0	0
1700061N14Rik	4	0	1	0	0	0	0	0	1	1	0	0	0	0
1700063A18Rik	0	0	0	0	0	0	0	0	0	0	0	0	0	0
1700063D05Rik	172	155	189	209	329	167	194	285	128	109	63	72	10	22
1700063H04Rik	2	6	5	2	0	0	3	0	1	0	2	2	0	0
1700063O14Rik	3	4	5	2	7	0	7	6	0	0	2	4	0	0
1700064J06Rik	0	0	6	2	8	0	0	6	2	0	0	0	0	0
1700064M15Rik	0	1	0	0	3	0	2	0	3	0	28	17	0	2
1700065D16Rik	7	10	16	16	18	16	16	11	1	0	8	19.9999	4	1
1700065I16Rik	1	0	9.77676	2	2	0	2	0	0	0	3	2	0	1
1700065J11Rik	0	0	0	0	0	1	0	0	0	0	0	0	0	0
1700065J18Rik	0	0	0	0	0	0	0	2	0	0	1	2	0	0
1700065L07Rik	0	0	0	3	16	0	0	0	0	0	0	0	0	0
1700065O20Rik	0	0	0	0	0	0	0	0	0	0	0	0	0	0
1700066B17Rik	0	0	0	0	0	0	0	5	0	0	0	0	0	0
1700066B19Rik	9	29	30	22	9	52	19	34	5	1	41	35	2	2
1700066C05Rik	142.153	115.088	122	179.703	246.246	165.935	196.796	265.384	64	52.3888	62.8439	233.911	1	10.5906
1700066J03Rik	7	14	21	18	16	6	13	15	2	2	9	36	5	7
1700066M21Rik	198	259	258	277	255	328	273	350	257	156	3856	3325	96	138
1700066N21Rik	0	6	0	0	0	7	0	0	0	0	0	0	1	0
1700066O22Rik	7	5	0	1	0	0	0	0	0	1	0	2	0	1
1700067G17Rik	3	2	16	6	4	0	0	1	0	0	5	3	0	0
1700067K01Rik	47	42	52	24	19	2	49	20	35	40	307	334	8	10
1700067P10Rik	7	18	4	0	0	1	36	0	0	0	0	0	0	0
1700069L16Rik	9	10	16	7	1	0	0	0	0	1	2	0	2	5
1700069P05Rik	0	0	0	0	2	0	0	1	0	0	0	0	0	0
1700071K01Rik	4	2	0	1	0	0	0	1	0	0	8.25753	0	0	0
1700071M16Rik	61.3763	74.4628	89.9979	73.459	107.003	42.0671	118.294	58.1755	0	1.13112	7.27542	14.2657	20.6194	24.7742
1700072B07Rik	0	0	0	0	0	0	0	0	0	0	0	0	0	0
1700072I22Rik	176	139	197	193	318	214	195	254	129	95	18	118	1	6
1700072O05Rik	0	0	0	0	1	0	0	3	0	0	0	0	0	0
1700073E17Rik	21	11	15	11	35	18	22	7	7	3	5.00002	36	3	5.63581
1700074H08Rik	0	0	0	0	1	0	0	0	2	1	0	1	0	1
1700074P13Rik	12	16	6	13	43	32	27.0001	3	0	0	0	0	0	0
1700080E11Rik	5	0	6	0	0	0	0	22	0	0	0	0	1	0
1700080N15Rik	0	0	0	0	0	0	0	0	0	0	0	0	0	0
1700080O16Rik	20	19	15	23	46	9	13	4	0	13	183	108	25	23
1700081H04Rik	0	1	5	0	0	0	0	0	0	0	2	0	0	0
1700083H02Rik	0	0	0	0	0	0	2	0	0	0	0	0	0	0
1700084D21Rik	38	26	22	30	85	26	63	39	24	22	15	34	2	5
1700084E18Rik	31	26	40	37	4	6	19	19	2	9	63	28	3	3
1700084F23Rik	10	1	1	0	11	4	2	33	0	0	0	0	0	0
1700084J12Rik	0	0	2	0	1	1.01717	0	0	0	0	24.6234	11.0528	3.26565	6.80336
1700084M14Rik	11.8723	5	1.47142	0	12.133	4	15.9617	8.20493	0	0	17.8916	5.29104	2.39894	1.87873
1700085C21Rik	0	0	0	0	2	0	2	0	0	4	0	0	0	0
1700086L19Rik	4	0	0	3	7	10	33	0	4	5	30	19	2	2
1700086O06Rik	38.2594	51.9094	35.8651	42.6561	39.4042	124.26	60.3025	71.5266	20.4974	6.3979	233.165	208.34	4	6
1700088E04Rik	28.6939	67.7152	81.5659	105.55	8.30202	10.8943	16.7952	15.2056	16.2047	1.84976	113.493	95.8082	0	3.22402
1700091H14Rik	154.621	171.072	150.661	206.597	373.038	174.477	232.91	230.918	19.441	8	94.0532	87.4732	32.6163	34.5856
1700092C02Rik	2	0	0	0	0	0	0	0	0	0	0	0	0	0
1700092C10Rik	0	0	0	0	0	0	1	0	0	0	1	6	0	1
1700092E19Rik	1	0	0	1	0	0	0	0	0	0	0	0	0	0
1700092K14Rik	0	0	0	2	0	0	0	0	0	1	0	1	0	0
1700092M07Rik	0	5	5	4	1	15	5	4	3	1	8	8	0	0
1700093K21Rik	6	12	2	14	25	9	51	0	7	6	66	47	0	4
1700094D03Rik	252.623	213.166	250.227	301.754	390.378	273.894	419.387	366.32	187.289	148.673	1125.58	641.332	55.3704	99.9993
1700094J05Rik	3.43146	1.0973	6.88596	15.2118	10.996	3.43404	8.51067	13.5839	9.37753	0	2.60483	2.18726	0	2.64506
1700094M24Rik	7	0	0	1	0	0	6	1	0	0	0	0	0	0
1700095A21Rik	196	138.47	158.595	197.471	389.584	307.626	282.555	319	10	9.17008	55.0028	93	9	31.4517
1700095B10Rik	0	0	0	0	15.7364	0	9.84971	0	0	0	0	0	0	0
1700095J03Rik	32.5812	20	13	10	1	9	19	18	9	2	21.2108	24.1779	4.2925	11
1700095J12Rik	17	9	5	20	25	10	34	49	0	10	1	0	1	1
1700096J18Rik	0	3	2	3	2	0	2	0	0	0	5	1	0	0
1700096K18Rik	28.3042	8.49671	15.3948	24.3346	12.6355	41.9614	29.1237	5.15248	17.3673	27.5894	74.481	76.094	6.0781	3.11891
1700096P03Rik	0	0	0	0	0	0	0	0	0	0	0	0	0	0
1700097N02Rik	51.1804	44.4722	40.0318	80.6873	112.051	31	88.2498	116.82	8.43926	2	39.0627	37.2828	2.15019	7.32899
1700099I09Rik	2	0	11	0	15.6057	13.5244	2	1	2.1064	3.41568	1.06176	0	1.19987	1.33808
1700100I10Rik	53.9531	62.6587	30.8638	67.7975	87.1814	66.4854	123.154	65.1365	28.5703	21.8075	70.1811	54.1812	9.63938	14.1852
1700100L14Rik	10	0	15	1	0	0	0	0	1	0	0	0	0	1
1700101I11Rik	3	6	0	0	0	0	0	0	3	0	19	22	1	2
1700101O22Rik	0	0	0	1	2	2	0	0	0	0	1	0	0	0
1700102H20Rik	0	5	4	6	2	1	18	0	7	0	20	19	1	0
1700102P08Rik	17	42	20	50	26	17	23	48	2	17	93	63	5	11
1700104L18Rik	0	0	0	0	4	0	1	0	0	0	0	0	0	0
1700105P06Rik	11	0	5	0	0	0	2	0	9	2	27	28	4	3
1700108F19Rik	0	6	1	3	3	0	7	0	30	23	5	5	1	0
1700108J01Rik	0	9	0	4	2	2	5	0	0	1	0	0	2	3
1700109G14Rik	0	0	1	0	0	0	1	1	2	1	0	3	0	0
1700109G15Rik	0	3	1	0	2	0	6	0	0	0	0	0	0	0
1700109H08Rik	14	18	11	36	27	11.1063	52	30	8	4.17419	76.0656	85.3418	4.12816	12.6539
1700109I08Rik	0	0	0	0	0	0	0	0	0	0	0	0	0	0
1700109K24Rik	23	31	33	24	103	104	67	52	16	7	50	89	15	11
1700110C19Rik	8	9	13	8	2	1	50	3	2	0	6	13	0	0
1700110I01Rik	7.12871	10.8921	11.4493	15.7953	23.0239	13.4522	14.7959	18.2441	25.4119	29.9326	5.19817	8.10872	9.31958	9.55192
1700110I07Rik	47	70	63	71	101	53.3645	117	61	7	4	37.5552	61	11	11
1700110K17Rik	5.10273	5.09969	3.13493	2.08805	6.52825	2.08051	3	1	19.7805	19.5882	0	1.00355	0	0
1700111N16Rik	15	8	12	12	16	6	23	22	2	1	0	8	1	0
1700112H15Rik	56	40	31	38	81	72	79	47	8	5	213	202	15	20
1700112J05Rik	6	1.05811	8	4	3	0	11	3	8.43383	5.388	1	2.04972	0	0
1700112J16Rik	85.597	74.5943	94.9846	162.428	141.348	126.168	296.805	228.438	165.991	145.247	91.6195	55.2927	75.5822	49.7026
1700113A16Rik	60.922	81.5345	35.9847	55.054	75.3897	74.5525	33.0271	44.1588	32.4463	41.4215	275.205	235.881	9.94602	16.6482
1700113B09Rik	1	0	0	0	7	0	0	0	0	0	2	0	0	0
1700113H08Rik	22	26	7	2	22	2	17	4	31	16	23	29	0	4
1700116B05Rik	0	0	0	0	0	0	2	0	0	0	0	0	0	0
1700119H24Rik	0	3	0	7	6	0	0	0	3	2	0	0	0	0
1700120C14Rik	2	4	4	8	0	4	6	8	1	0	13	21	0	0
1700120E14Rik	3	0	9	0	0	0	4	0	1	0	0	0	1	1
1700120G07Rik	12	17.4066	9	23	24	29.3359	13	17.0671	7	5.02384	18	39.1687	1	0
1700120K04Rik	1	0	2	6	7	1	8	4	2	0	49	38	0	1
1700121L16Rik	7	12	26	17	30	22	23	24	0	0	4	36	0	0
1700121N20Rik	1	0	0	0	0	0	19	7	0	0	2	0	0	0
1700122C19Rik	3	0	0	0	0	0	0	0	0	0	0	0	0	0
1700122H20Rik	0	0	0	0	0	1	0	0	1	0	0	0	0	0
1700122O11Rik	0	0	1	0	0	0	0	0	0	0	0	0	0	0
1700123J17Rik	6	3	5	2	0	6	0	0	0	0	0	0	0	0
1700123K08Rik	0	4	1	0	0	0	9	0	0	0	0	4	0	0
1700123L14Rik	13	7.00306	18.966	3.01402	13	32.0326	34.0642	5.45535	0	0	0	5.05381	1.97833	0
1700123M08Rik	13	10	29	14	18	5	32	10	9	8	102	94	9	9
1700123O12Rik	0.760456	0	0	6.76321	3	5	0	0	1	0	1	3.81879	0	0
1700123O20Rik	330.604	350.782	311.97	319.171	411.222	324.882	377.395	291.128	242.982	145.316	2126.4	2178.37	120.492	158.658
1700123O21Rik	0	0	0	0	0	0	0	5	0	0	0	0	0	0
1700124L16Rik	1	0	0	0	9	5	4	5	0	1	5	5	0	2
1700125G02Rik	0	0	0	0	0	0	0	0	0	0	0	0	0	0
1700125G22Rik	10	5	15	8	47	23	30	31	5	8	21	8	4	1
1700125H03Rik	0	0	0	1	0	0	0	0	4	1	0	0	0	0
1700125H20Rik	4	13	19	7	0	0	0	0	3	12	49	44	10	7
1700126H18Rik	0	0	0	0	0	0	0	0	0	0	0	0	0	0
1700128A07Rik	0	1	0	0	0	0	0	2	0	0	1	0	0	0
1700128F08Rik	320.318	307.575	339.488	425.346	632.924	505.735	440.966	704.952	181.354	142.065	92.0327	183.56	27.96	30.6347
1700129C05Rik	5	3	5	4	9	2	12	8	0	0	0	0	0	0
1810006J02Rik	0	0	0	1	0	0	0	0	3	0	0	0	0	0
1810007C17Rik	0	0	0	0	0	0	0	0	0	0	0	0	0	0
1810007D17Rik	5	1	11	2	11	13	15	11	0	3	6	5	2	1
1810008I18Rik	0	0	0	1	0	0	0	0	0	0	0	0	1	0
1810009A15Rik	133	183	116	95.4508	49	100	148	81	100.286	57	1859.44	1345.4	57.2513	101.49
1810009J06Rik	0	0	0	0	0	0	0	0	0	0	0	0	0	0
1810010D01Rik	2	0	0	1	0	0	2	1	0	0	13	6	0	2
1810010H24Rik	11	21	15	6	16	15	25	78	11	1	96	92	3	7
1810012K16Rik	1	2	2	8	11	1	10	18	0	1	5	9	0	0
1810013A23Rik	0	5	2	6	0	0	0	2	0	0	1	1	1	1
1810013L24Rik	1770.96	1867	2029	1956	2285	2219	2331	2176	2190	1539	7426	6463	369	557
1810014B01Rik	136.194	125.007	153.089	158.095	202.638	81.7918	171.679	148.849	83.0511	70.497	473.146	406.322	17.1551	46.5303
1810018F18Rik	5	12	17	9	14	15	11	18	2	6	5	8	0	3
1810019D21Rik	16	4	8	5	0	3	13	6	37	42	59	39.2669	2	5
1810020O05Rik	31	24	55	54	109	121	143	68	6	7	55	37	1	2
1810021B22Rik	0	7	0	0	0	0	2	1	2	6	4	6	1	1
1810022K09Rik	193	208	222	251	183	491	304	162	163	100	2752	1737	128.784	200
1810024B03Rik	21	17	18	36	59	12	19	27	10	5	56	73	3	4
1810026B05Rik	133.18	143.896	160.715	169.931	337.829	262.902	296.624	262.305	125.686	92.4774	1096.75	980.71	50.5098	91.4394
1810030O07Rik	1104.33	870.941	1009.75	1095.6	1570.36	1512.35	1548.62	1526.06	876.92	496.179	2568.52	2577.54	230.168	366.331
1810032O08Rik	215	138	220	189	133	242	315	174	29.0001	36	1963	1170	59	93.557
1810034E14Rik	51	79	88	72	76	53	152	123	87	45	49	85	10	12
1810037I17Rik	531	574	519	498	664	706	1016	551	230	205	3596	2410	93	151
1810041H14Rik	9.05775	12	8	7	1	1.07373	6.06841	3.12349	0	0	14	10	1	0
1810043G02Rik	36	41	65	58	43	23	53	74	31	19	182	320	10	21
1810044D09Rik	9	20	7	17	21	7	23	11	4	9	188	110	7	13
1810046K07Rik	0	1	23	0	2	2	32	13	1	2	4	2	0	1
1810053B23Rik	6	0	5	5	1	0	4	1	2	2	1	5	4	9
1810055G02Rik	1299.89	1099.44	1427.17	1516.29	1103.94	1096.12	1007.19	1151.5	1256.54	877.121	3922.27	3334.26	143.266	261.137
1810058I24Rik	300	331	324	270	125	316	358	252	291	150	2301	2623	110	193
1810062G17Rik	0	2	0	0	0	0	0	0	6	3	1	10	2	0
1810062O18Rik	14.2045	20.8235	19.7934	14.5355	32.1397	36.3653	32.324	27.1445	16.8338	11.5498	52.8847	48	5.12927	6.53774
1810063I02Rik	0	0	0	0	0	0	3	5	0	0	0	1	0	0
1810064F22Rik	146.067	103.094	134.936	89.2402	261.505	159.107	215.698	132.639	33.0625	28.2907	65.0449	185	13.5353	14.586
1810065E05Rik	0	2	3	0	0	0	0	0	0	0	1	0	0	0
2010001A14Rik	130.847	85.4771	127.852	125.114	183.397	124.422	115.633	159.49	37.6437	48	37.6307	121.271	5	5.44998
2010003K11Rik	1	0	9	0	1	0	1	0	18	3	18	27	5	4
2010005H15Rik	149	58	92	72	172	107	152	94	3	3	24	69	3	5
2010009K17Rik	5	2	0	2	3	0	6	0	1	0	2.14265	3	0	1
2010010A06Rik	0	1	0	0	0	0	1	0	1	1	0	5	1.41038	1.18206
2010016I18Rik	22	6	1	10	0	54	19	5	1	1.20942	6.17353	2	0	3
2010106C02Rik	0	0	0	0	0	0	0	0	0	0	0	0	0	0
2010106E10Rik	0	1	0	0	0	0	0	0	0	0	3	1	0	0
2010109A12Rik	0	3	9	3	5	0	6	6	0	0	15	19	1	2
2010109I03Rik	68.3361	53.9975	65.6115	67.5476	115.195	89.6639	86.9467	82.685	41.0628	47.2433	49.2949	145.418	14.1631	21.0078
2010111I01Rik	434.23	502	522	518	491	470	480.911	512	183	163	724.829	834.857	162.568	269.746
2010204K13Rik	24	25	36	26	39	45	126	47	63	58	99	184	2	1
2010300C02Rik	454	390	522	516	141	259	213	300	35	21	1427	1104	322	558
2010308F09Rik	0	11	2	0	0	0	0	0	0	0	0	1	0	0
2010310C07Rik	1	0	0	0	0	0	0	0	8	14	4	0	0	0
2010315B03Rik	60.9038	55.8016	40.9445	75.1788	109.154	98.5809	93.8308	66.0236	105.037	75.4182	457.767	516.995	33.256	41.08
2010320M18Rik	43	49	29	68	21	87	16	23	8	17	452	399	26	36
2200002D01Rik	2	1	5	2	15	9	0	4.84412	1.74233	0	7.03771	19	0	2
2200002J24Rik	0	0	0	0	0	0	0	4	1	3	2	44	0	0
2210010C04Rik	63	99	35	75	79	78	58	50	10	4	33	29	7	12
2210011C24Rik	4	7	1	1	0	17	2	0	1	3	47	68	2	1
2210016F16Rik	644.073	667.608	640.842	782.222	440.035	565.628	697.596	617.973	570.306	369.386	4471.68	4324.97	131.157	209.858
2210016L21Rik	371	281	314	350	291	395	343	168	123	112	1456	1139	79	102
2210039B01Rik	82.5963	107.293	120.007	115.412	243.598	102.966	195.907	138.163	37.0755	37.6044	175.225	260.051	45.4992	78.0235
2210404E10Rik	8	0	6	4	3	0	1	0	0	0	2	1	0	0
2210406O10Rik	26	34	46.0001	14	9	46	19	21	43	12	129	109	3	2
2210407C18Rik	0	0	0	2	0	1	0	0	0	0	0	2	0	1
2210408F21Rik	11	15	9	30	30	19	30	21	5	6	86.9999	60	4	14
2210408I21Rik	59	80.9999	126	91	86	91	90	93	173	96	332	381	40	43
2210409D07Rik	0	0	0	0	0	0	0	0	0	0	0	0	0	0
2210409E12Rik	0	0.941021	0	1	1	1	1	4.32201	6.55706	1	5	3.56507	0	0
2210414B05Rik	0	0	0	0	0	0	0	0	0	0	0	0	0	0
2210416O15Rik	2	0	1	0	0	4	0	0	0	0	18.4582	16.1959	0	1
2210417A02Rik	53	10	11	15	25	37	8	43	12	6	8	6	0	1
2210418O10Rik	475.962	426.255	469.197	561.822	943.801	732.98	633.707	661.169	425.18	354.897	893.841	1260.65	108.469	175.721
2210420H20Rik	2	14.7823	15.9733	11.4845	8	13	15.3328	13.2652	8	4.84025	4	8.75154	2	1
2300002M23Rik	0	0	0	0	0	0	0	0	0	0	1	0	0	0
2300003K06Rik	0	0	0	0	0	0	0	0	0	0	0	0	0	0
2300009A05Rik	25	26	29	24	17	34	45	12	47	21	205	206	9	14
2310001H17Rik	4	0	0	0	0	0	4	0	0	1	0	5	0	0
2310001K24Rik	0	0	1	2	0	0	1	0	0	0	1	0	0	0
2310002D06Rik	0	1	0	0	1	17	2	0	1	1	0	4	0	0
2310002F09Rik	14.0271	1.00185	8.03842	1.00573	32.4162	2.20904	13.0989	5.03281	2.00543	4.00813	9.00172	2	1	7.07496
2310002L09Rik	0	0	0	0	0	0	0	0	0	0	0	0	0	0
2310003N18Rik	2	3	2	4	6	3	0	3	1	2	0	0	1	0
2310005A03Rik	69.3212	63.9835	65.197	65.6034	140.759	42.9292	100.624	71.1979	19.8972	20.1842	17.3706	40.7283	2.03511	4.09255
2310005E17Rik	0	0	0	0	0	0	0	0	0	0	0	0	0	0
2310007B03Rik	0	0	1	0	0	2	0	0	5	0	1	0	0	0
2310008N11Rik	0	0	0	0	0	0	0	0	0	0	1	0	0	0
2310009A05Rik	19	8	21	7	12	9	41	37	11	10	105	162	7	5
2310009B15Rik	89	108	80	77	46	72	65	41	49	35	227	221	21	32
2310010J17Rik	55	21	33	21	3	41	22	5	18	20	207	167	27	26
2310011J03Rik	99	75	68	99	56	26	73	42	63	30	1409	1344	47	72
2310015A10Rik	498	304	368	414	777	529	404	510	118	116	590	868	60	93
2310015D24Rik	9	10	7	12	14	0	13	15	6	1	4	1	1	1
2310016D03Rik	0	0	0	0	0	0	0	0	0	0	0	0	0	0
2310016G11Rik	12	6	16	8	24	12	13	20	3	0	2	5	0	0
2310020H05Rik	0	0	0	5	0	0	1	0	0	0	0	0	0	0
2310022A10Rik	161	227	215	216	195	152	266	172	125	90	1202	1247	46	106
2310022B05Rik	142	146	126	200	73	153	58	42	536	456	870	2324	45	81
2310030A07Rik	10	4	1	2	0	9	0	3	0	0	13	6	0	1
2310030G06Rik	57	75	64	24	18	22	7	33	29	17	300	231	7	11
2310033P09Rik	258	474	369	345	66	501	199	60	148	202	1771	1318	58	84
2310034C09Rik	0	0	0	0	0	0	0	0	0	0	0	0	0	0
2310034G01Rik	7	3	12	4	4	4	3	3	3	1	98	70	12	8
2310034O05Rik	37	4	10	18	32	23	15	15	1	1	2	9	1	1
2310039H08Rik	111	124	130	111	38	19	142	53	120	69	696	517	40	64
2310039L15Rik	76.4522	76.6587	82.2795	123.785	115.131	131.034	107.048	86.3804	69.3001	54.5097	160.443	94.8605	156.532	197.092
2310040G24Rik	18	35	9	7	5	5	6	16	7	4	33	35	9	8
2310043L19Rik	0	3	0	0	0	0	0	0	0	0	4	1	0	0
2310043M15Rik	31.5862	10.2011	46.2035	49.0376	82.272	40.1699	35.2404	27.5202	8.68196	4.17318	52.6339	71.2294	4.36623	9.53497
2310043O21Rik	0	0	0	0	2	0	0	0	0	0	0	0	0	0
2310050C09Rik	0	0	0	0	0	0	0	0	0	0	1	0	0	0
2310057J18Rik	0	0	0	0	0	0	0	0	0	0	0	0	0	0
2310057M21Rik	662.326	705.167	779.146	758.707	806.663	930.012	922.618	649.464	321.27	230.763	3144.35	2584.15	186.968	286.949
2310057N15Rik	0	0	0	0	1.20789	0	0	2.95152	0	1.06395	0	0	0	0
2310061I04Rik	469	454	537	530	612	604	799	593	191	116	3925	2826	143	223
2310061N02Rik	0	0	0	0	0	0	0	0	0	0	0	0	0	0
2310065F04Rik	0	0	0	0	0	0	0	0	0	0	0	1	0	0
2310068J16Rik	79.7849	54.2591	46.7342	37.7963	34.5666	71.7636	32.43	37.5159	17.8079	5.19137	121.034	109.164	11.6669	16.8307
2310069B03Rik	1	0	2	0	0	0	0	0	1	10	4	5	0	0
2310069G16Rik	0	1	0	2	1	0	0	1	0	0	3	4	1	0
2310075C17Rik	2	1	3	2	9	3	2	2	0	1	0	4	1	1
2310079G19Rik	0	0	0	0	0	0	0	0	0	0	0	0	0	0
2310081J21Rik	28	35	26	25	26	20	29	13	0	0	26	18	11	9
2400006E01Rik	217	178	172	228	281	219	215	218	30	19	269	238	25	30
2410002F23Rik	1026	1108	1001	1052	760	1168	1093	634	488	312	7879	9202	256.283	442.991
2410003L11Rik	3	5	8	6	11	0	18	2	1	2	67	59	2	10
2410004B18Rik	408	383.999	370.001	433	355	415.999	433.001	283.999	250	174	2799.99	1969	94.9999	142
2410004I01Rik	5	2	4	0	0	0	11	0	3	6	21	19	2	2
2410004P03Rik	160.604	145.103	130.949	206.978	340.923	194.513	209.579	230.996	194.402	116.241	110	122.194	11	10
2410006H16Rik	216	207	297	213	87	190	198	125	109	85	491	442	43	49
2410012E07Rik	18.6029	7.6816	16.8142	39.1146	45.7138	20.9709	26.154	62.7869	2.12172	5.36523	12.0232	19.0938	4.14096	4.11525
2410015M20Rik	530	509	477	438	201	269	362	100	113	107	4039	3040	117	218
2410017I17Rik	0	0	0	0	0	0	0	0	0	1	1	0	0	1
2410018L13Rik	73.5776	47	76.1669	77.988	79.889	56.7909	87.4931	42.9828	90.3699	39.4035	406.83	901.122	5.69222	9.70984
2410021H03Rik	58.882	33.8844	52.1184	56.7432	119.725	61.6255	80.8699	77.9407	35.4523	20.4611	50.8884	93.7934	4.8231	6.06108
2410022M11Rik	51	19	33	46	6	3	17	43	30	29	293	317	10	9
2410124H12Rik	0	0	9	1	0	0	0	3	1	0	2	2	1	0
2410131K14Rik	208	225	182	251	196	64	164	181	97	54	2488	2276	83	165
2410137M14Rik	3	0	2	4	0	0	0	0	0	0	0	2	0	0
2410141K09Rik	732.307	663.105	645.444	950.555	1136.46	1540.87	1292.78	1901.66	154.398	70.4341	3213.1	2416.63	176.76	243.982
2500002B13Rik	51.3496	63.7642	83.0729	55.6796	100.932	71.2086	57.077	107.932	51.3602	39.1686	71.9185	83.1386	9.71044	19.4032
2500004C02Rik	267.168	403.294	345.898	272.34	292.446	352.34	424.652	280.665	438.604	273.531	2459.59	911.057	120.27	168.615
2510002D24Rik	45.2195	32.2505	57.6025	53.8084	46.2192	52.264	55.5721	58.1536	65.0731	33.7071	269.588	263.686	9.74962	14.1386
2510003B16Rik	17	9	13.9792	17	13	10	22.7324	14	1	3	33.7077	37.8221	0	3.40452
2510009E07Rik	89	124	60	81	116	59	121	257	1130	765	226	856	29	20
2510039O18Rik	692	723	777	869	542	696	621	626	525	368	11930	11053	168	235
2610001J05Rik	39	81	28	43	41	48	45	50	75	50	484	697	14	22
2610002M06Rik	170	170	168	186	223	134	171	223	440	286	1257	1691	44	60
2610005L07Rik	1162.79	369.541	594.532	384.831	1218.46	629.099	512.431	371.213	958.671	602.069	1100.5	2552.21	129.252	221.683
2610008E11Rik	327	276	268	360	639	601	642	559	526	341	779	1727	116	189
2610016A17Rik	37	9	15	11	87	21	87	24	0	0	8	9	2	4
2610020C07Rik	290.894	229.565	258.286	278.457	417.986	399.234	466.712	564.97	104.8	80.5028	1322.04	903.479	43.3486	50.8869
2610024D14Rik	139.755	179.883	186.475	228.065	312.129	254.597	260.859	391.646	98.8321	64.0107	81.5294	141	28.8926	46.7018
2610027K06Rik	81.8719	35.8055	49.8376	59.4386	111.775	59.8073	60.5151	38.4978	33.8182	13.3895	10.6516	68.6276	11.4347	24.983
2610028E06Rik	123.861	116.129	89.7785	119.868	62.9253	93.3339	57.4525	109.771	47.2741	28.2996	34.3739	67.429	4	9
2610028H24Rik	13.1364	9.36252	13.5869	5.97728	0	4.08759	15.2535	13.2105	0	0	36.3302	33.4421	0	1.12532
2610035D17Rik	88	42	35	43	162	115	88	165	23	15	387	655	25	38
2610035F20Rik	8	9	9	4	0	0	0	0	0	0	12	3	1	3
2610037D02Rik	270.188	285.149	265.271	285.665	353.086	327.786	286.487	295.243	59.6146	32.4238	176.741	218.234	27.7872	47.3674
2610042L04Rik	24.2731	30.9455	11.4708	27.5407	3.81578	39.0412	18.0458	10.5291	22.1522	10.2331	356.689	155.516	5.25374	22.0216
2610044O15Rik8	357.149	528.475	450.809	581.16	648.451	684.808	537.396	500.427	219.417	100.658	825.108	1339.22	52	90
2610203C22Rik	3	7	1	4	22	13	7	28	5.06349	0	0	16	0	1
2610206C17Rik	48	27	36	60	63	87	84	96	11	11	24	74	4	11
2610301B20Rik	289	253	317	357	329	313	457	263	326	135	1558	1503	81	106
2610306M01Rik	3	13	3	15	15	15	1	11	27	6	162	157	8	5
2610307P16Rik	514.754	468.611	508.636	541.869	766.664	645.035	724.529	681.885	60.3001	45.5391	271.966	237.482	143.664	178.99
2610316D01Rik	0	0	6	0	0	0	3	0	1	1	2	10	0	0
2610318M16Rik	2	1	2	0	3	21	6	2	2	0	10	4	2	0
2610318N02Rik	176	160	120	123	64	47	90	56	54	20	948	719	30	65
2610507B11Rik	13222	14910	16175	15655	12996	14342	16628	12673	7969	4938	80733	82890	3362	4902
2610507I01Rik	165.211	178.771	159.497	153.175	208.131	318.391	188.242	299.178	568.257	346.94	1324.15	1291.86	47.4029	94.3828
2610524H06Rik	705.835	699.984	705.53	708.939	928.147	975.271	1253.77	696.617	215.516	131.276	3410.92	2454.13	198.187	253.704
2610528A11Rik	0	4	3	3	5	0	6	0	3	1	6	1	0	1
2610528J11Rik	0	0	0	0	0	0	0	0	5	0	0	2	0	0
2700012I20Rik	8	6	8	2	2	0	13	0	4	2	34	37	13	3
2700038G22Rik	352.376	312.781	392.529	376.041	426.601	627.041	374.599	582.155	255.635	177.351	1185.78	937.29	54.5554	86.2309
2700046A07Rik	0	14	1	14	0	0	8	0	1	10	2	21	6	5
2700046G09Rik	9	13	17	12	9	23	18	27	21	35	194	152	2	16
2700049A03Rik	1050	1157	1265	1429	1599	1294	1398	1249	585	357	3668	3813	292	424
2700054A10Rik	116.511	122.893	167.129	151.264	159.619	175.575	128.875	107.998	50.2447	53.5722	307.599	313.876	57.5077	71.6498
2700062C07Rik	308	410	276	382	207	428	435	280	163	113	1086	952	43	68
2700069I18Rik	58.9729	20.018	33.9273	56.748	48.3566	46.2764	84.3447	47.8678	14.5218	7.59773	30.7964	30.4581	5.78134	4.53359
2700070H01Rik	86.3853	120.624	85.258	121.317	170.151	151.625	145.369	147.101	18.1863	23.1023	115.007	170.282	25.6548	38.9921
2700081O15Rik	260	375	325	301	186	237	271	153	895	554	5084	6332	105	155
2700089I24Rik	37.7863	38.8395	45.4514	35.9979	53.105	59.0121	92.9515	43.8817	148.428	112.624	23.0021	44.2246	25.1998	29.3921
2700097O09Rik	232	176	241	285	222	371	222	292	134	71	1258	1139	34	69
2700099C18Rik	619.847	950.649	836.937	706.956	508.919	803.682	637.794	454.016	87.2077	63.864	2090.73	1229.44	113.473	175.877
2810001G20Rik	161	131	131	109	164	229	144	80	65	50	906	603	42	58
2810002D19Rik	47	97	91	49	103	130	98	126	69	61	555	523	22	53
2810004N23Rik	1423	1497	1256	1338	1323	787	1255	891	785	556	6076	4877	305	406
2810006K23Rik	507.642	491.257	521.272	549.569	922.525	623.312	565.608	417.179	358.775	233.675	1177.41	1189.84	94.5965	171.205
2810013P06Rik	226.728	260.237	177.95	241.75	269.594	202.629	368.382	308.038	151.409	90.1475	1684.96	1173	59.2219	125.496
2810021J22Rik	256.555	286.747	214.549	324.866	410.009	441.96	323.326	334.9	285.012	214.762	2118.84	2149.3	95.7583	116.519
2810025M15Rik	219	185	140	146	123	169	193	161	106	52	2159	1479	83	100
2810029C07Rik	27	38	37	64	87	89	68	69	18	12	256	131	24	30
2810032G03Rik	11	35	16	26	66	20	4	17	8	6	82	90	12	21
2810047C21Rik1	276.768	301.569	398.188	312.19	303.565	308.183	358.606	317.356	123.35	40.1298	806.198	758.302	95.0755	105.669
2810049E08Rik	13	14	26	10	52	7	24	21	6	7	1	13	3	0
2810403D21Rik	16	13	25	20	76	129	39	87	2	1	38	57	11	14
2810404M03Rik	0	0	0	0	0	0	0	0	0	0	0	0	0	0
2810405F15Rik	2	4	6	6	15	8	4	5	1	2	1	0	0	1
2810408A11Rik	79	52	37.9999	41	77.9999	164	106	2	36	18	223	195	12	21
2810408I11Rik	148	152	190	151	141	131	313	109	69	34	727	425	19	22
2810410L24Rik	97	85	70	71	39	86	72	29	15	11	287	489	10	13
2810414N06Rik	93.0691	141.048	115.768	140.752	181.664	160.734	143.572	149.383	98.9454	93.6986	56.8888	173.283	12.4316	11.2141
2810429I04Rik	125.968	57.906	80	63.8789	105.613	28	97.787	179	13.471	12	142.096	193.615	3.70688	12.5029
2810433D01Rik	93.0222	97.3926	90.5782	88.1659	135.71	124.461	158.077	165.572	22.5165	31.3914	24.2609	56.427	4.25424	4.05307
2810442N19Rik	0	5	3	2	0	0	0	0	6	3	0	1	1	1
2810454H06Rik	31	20	15	33	37	92	18	20	13	16	51	71	14	27
2810459M11Rik	44	36	27	46	136	54	154	148	25	7	127	156	16	27
2810468N07Rik	36	32	35	66	30	19	48	41	7	1	242	235	6	14
2810471M01Rik	18.6794	9.30287	9.16383	24.3828	34.4304	30.0848	16.7959	20.6539	47.3809	25.2564	14.6299	49.2417	5.99721	12.2644
2900005J15Rik	53.6304	68.7839	49.2706	62.3381	86.8464	85.6775	109.321	70.6134	151.894	58.6513	124.417	123.472	9.87591	15.0663
2900009J06Rik	6	10	2	2	0	10	3	2	14	1	42	46	0	1
2900011O08Rik	26	36	25	17	21	0	48	18	12	18	62	69	3	6
2900026A02Rik	2237.74	1446.04	1582.76	2165.93	4332.22	4062.11	4766.57	3584.65	465.933	201.646	2241.13	2409.85	326.973	627.644
2900040C04Rik	2.04693	0	1.03642	3.48223	2.21028	5.07647	2.0411	8.54269	1.24479	2.22756	1.1619	1.08189	1.73425	0
2900041M22Rik	23	25	29	20	25	40	37	22	0	0	142	99	11	27
2900052L18Rik	407.271	415.164	501.31	475.291	410.471	509.922	476.638	414.553	247.097	171.97	1067.17	1401.45	100.282	114.337
2900052N01Rik	15.0853	8.07301	6.15426	22.1769	59.8353	30.2839	25.2283	9.01416	2.00249	8.02802	4.06203	9.00176	5.43804	7
2900055J20Rik	0	0	2	0	0	0	0	0	0	1	0	3	0	0
2900057B20Rik	0	13	3	2	4	0	1	0	0	2	3	1	0	3
2900060B14Rik	1	5	4	0	4	2	13	1	4	4	2	2	1	1
2900076A07Rik	66	103	56	94	135	318	118	92	5	9	99	142	6	7
2900079G21Rik	0	1	0	2	1	2	5	4	0	0	0	0	0	0
2900092C05Rik	0	5	7	0	0	0	4	0	0	0	0	0	0	0
2900092D14Rik	61.9871	21.9122	39.5846	61.2533	64.3297	32.3001	45.2802	79.8998	27.7948	15.0072	20.7886	51.9531	45.0908	48.1655
2900093K20Rik	42	52	28	21	26	59	44	19	0	0	393	188	4	9
2900097C17Rik	2245	2108	2207	2460	1980	2355	2624	2462	3422	2088	24264	24825	661.25	1088.58
3000002C10Rik	38.908	43.568	23.1685	28.1729	56.2593	77.7335	87.1903	14.1762	50.7881	43.0861	212.758	191.111	20.5696	12.7521
3010001F23Rik	0	7	0	8	1	0	2	2	4	3	7	17.9999	1	0
3010003L21Rik	99.6997	85.2706	50.1158	52.0776	48.3618	54.2064	61.1401	42.3128	33.2278	21.0878	481.834	481.283	37.1063	51
3100003L05Rik	0	0	0	0	0	0	0	0	0	0	0	0	0	0
3110009E18Rik	22	30	17	35	20	15	62	9	6	6	304	268	15	22
3110009F21Rik	19.5107	7.38993	28.0338	31.6963	37.2707	16.2692	38.2072	37.1423	3.64859	5.93921	8.03571	10.5385	5.23251	7.35553
3110015C05Rik	41.7598	54.596	66.1061	118.124	137.104	52.6222	58.7576	93.54	42.3606	35.8971	9.18775	10.2371	18.8655	22.9064
3110021A11Rik	92	45	64	78	93	45	44	89	9	8	45	55	7	8
3110039I08Rik	0	1	1	8	2	0	0	2	41	28	13	272	1	4
3110039M20Rik	1	0	0	0	0	0	0	0	0	0	0	0	0	0
3110040N11Rik	105	169	130	127	84	82	110	97	42	49	466	439	21	35
3110045C21Rik	24	44	60	38	28	51	44	32	29	15	735	413	26	37
3110056K07Rik	223	225	214	211	192	284	247	252	63	38	718	768	48	67
3110070M22Rik	2.18702	6	4	18	3	2	35.4087	17.5505	5	44	41.7536	34	1	3
3110082I17Rik	698.618	762.415	580.396	802.888	550.964	377.787	581.375	271.155	366.795	249.777	1959.53	1550.7	117.731	146.146
3110082J24Rik	20.1251	17	23	9	4	13	25.1713	17	1	1	56	55	9	10
3110099E03Rik	15.022	5.00559	8	9.02811	12.0239	0	16.0303	19.0529	25	4	38	33.0136	4	6
3200001D21Rik	62	68.6324	50.6573	61.2253	96.6962	165.389	129	46.7349	35.4995	29.7825	11.5202	34.9482	3	9.12117
3300002I08Rik	27.2142	24.5858	25.5591	26.991	25.0345	19.3679	25.5428	15.3626	13.6685	11.5167	49.3265	82.0398	5.09364	1.03923
3300002P13Rik	6	0	10	0	0	0	2	1	5	5	47	28	2	0
3300005D01Rik	0	1	1	0	0	21	4	4	1	0	1	1	1	0
3425401B19Rik	4.282	19.4411	9.75355	13.4969	9.66207	16.133	14.148	9.47294	38.787	22.8978	5.11272	21.0485	8.3313	12.8933
3632454L22Rik	94.6564	64.902	97.7181	71.5282	116.926	137.821	157.963	130.778	55.9466	33.8894	22.2415	72.2294	16.0617	17.2862
3830403N18Rik	48.3368	25.6382	35.6387	55.3181	49.143	115.317	61.8169	38.851	10.4242	6	1153.44	775.861	46.8654	72.0894
3830406C13Rik	258	246	299	259	421	665	608	454	175	95	1108	1214	51.9996	68.483
3830408C21Rik	374	409	368	323	450	282	319	250	57	59	237	222	15	30
3830417A13Rik	64	40	66	102	87	26	44	69	25	7	276	206	10	23
3830432H09Rik	87.5043	76.3492	117.749	123.228	187.726	197.494	104.762	98.5912	62	37	37	48	3	7
3930402G23Rik	8	7	9	0	1	2	0	0	7	0	2	1	0	1
4430402I18Rik	24	89	76	27	30	12	86	17	38	49	61	37	5	2
4631405J19Rik	10	13	7	3	1	3	4	0	2	0	4	7	7	5
4632404H12Rik	397.2	356.008	366.531	402.316	557.282	372.507	475.439	510.313	143.365	79.6753	1218.64	766.71	69.0454	135.4
4632415L05Rik	811.834	735.29	794.597	855.129	1259.34	1030.92	1087.25	1133.6	674.183	518.216	458.352	1091.92	69.6745	135.869
4632427E13Rik	147	185	190	224	268	198	208	358	104	84	18	24	14	22
4632428C04Rik	0	1.11223	2.21559	0	14.2789	52.6548	14.9526	3.87068	2.05308	0	2.03382	8.6823	0	1.37025
4732414G09Rik	3	0	0	1	0	0	1	0	0	0	2	1	0	0
4732416N19Rik	47.517	23.6437	28.4414	32.2102	54.0389	34.8709	37.881	76.6852	13.8963	12.5479	42.012	47.0559	0	1.47592
4732471J01Rik	107.512	77.6259	126.229	113.797	75.5823	113.513	119.053	69.886	39.8533	26.9083	136.245	156.641	25.7402	50.7621
4732490B19Rik	1	0	0	4	7	0	9	0	0	0	14	21	0	0
4732491K20Rik	55	38	38	58	74	20	61	114	15	22	106	202	11	10
4831407H17Rik	0	0	2	0	3	0	0	0	4	0	0	0	0	0
4831440E17Rik	400.275	291.107	410.622	432.467	587.179	690.939	442.879	442.817	72.9132	35.6366	582.966	544.279	63	98.2336
4833411C07Rik	0	1	0	0	0	0	0	0	5	0	0	0	1	1
4833412C05Rik	29	65	40	42	23	17	44	28	2	3	17	24	4	6
4833415N18Rik	36.8846	48.8328	41.3727	42.1824	61.2377	50.0965	45.703	77.5342	13.1345	23.9915	21.8952	23.8484	2.38322	3.30719
4833417C18Rik	192.604	219.785	180.956	181.681	110.768	118.547	249.396	174.216	176.929	72.136	287.774	188.556	35.404	36.5007
4833418N02Rik	2	3	8	6	5	3	13	4	18	7	46	66	1	1
4833419F23Rik	44	43	95	32	43	1	58	24	8	4	60	71	8	11
4833420G17Rik	1481.6	1713.97	1442.65	1564.53	2629.08	2519.59	2078.79	1938.35	596.596	467.443	4934.65	4795.5	338.742	535.082
4833422C13Rik	25	17	13	23	40	77	56	29	28.0001	14	15	9	6	4
4833422M21Rik	27	14	21	18	34	25	41	7	1	0	14	5	3	3
4833423E24Rik	0	0	0	0	0	0	0	0	0	0	4	0	0	1
4833427F10Rik	134.408	141.341	147.223	156.373	264.66	147.944	166.255	217.111	104.352	70.8842	56.4267	153.357	20.7292	41.4676
4833427G06Rik	2	0	1	0	2	0	10	0	0	0	2	4	3	0
4833428L15Rik	0	0	0	4	0	16	10	0	0	3	3	2	0	0
4833438C02Rik	25	0	33	10	0	8	0	9	97	71	70.7492	95	2	5
4833439L19Rik	3189.45	3291.35	3637.78	3820.01	2820.68	3036.05	3437.4	2843.31	2498.05	1652.64	13566.9	13167.7	426.629	688.157
4921501E09Rik	5	1	3	2	4	0	9	0	0	0	0	0	0	1
4921504A21Rik	27.1111	34.8249	21.5267	41.6056	57.2998	21.8931	61.7623	65.3813	26.1645	18	13.2742	53.3759	3	3.04056
4921504E06Rik	9	1	7	2	0	0	5	0	0	0	1	0	0	1
4921507G05Rik	19	3	2	7	20	0	11	4	0	0	19	12	5	5
4921507P07Rik	84	130	55	93	90	131	39	98	30	7	480	438	23	27
4921508D12Rik	0	0	0	0	0	0	0	0	0	0	1	2	1	0
4921509C19Rik	9.49206	0	3.91832	6.43201	6.78658	32.0579	4.60075	4.55517	4.89778	0	4.49775	0	0	0.951802
4921509O07Rik	0	0	0	0	0	0	0	0	0	0	1	0	0	0
4921511C10Rik	12	9	12	24	48	6	45	13	2	3	1	0	5	3
4921511C20Rik	0	0	1	0	0	0	0	0	0	0	0	0	0	0
4921511I17Rik	2	9	6	9	75.8544	41.4688	78	27	1.05351	5	21.5304	6	4	7
4921511M17Rik	0	2.5	0	0	0.495423	0	0.678996	0	0	0	0	0	0	0
4921513H07Rik	0	5	5	6	0	0	0	0	0	0	0	0	0	0
4921513I03Rik	35.6044	50.0894	59.2045	57.7671	75.4388	53.3036	59.1366	69.1599	12.4261	16.5032	16.2277	72.5295	2	8.06713
4921515E04Rik	325.474	261.107	396.348	377.154	650.528	365.196	445.584	580.684	98.2369	59.5617	54.1849	137.243	26.1805	36.7904
4921517D22Rik	1.00014	0	8.00033	2	1.00017	0	0	0	1.00009	0	10.0549	0	1.00019	0
4921518K17Rik	171.024	179.464	198.948	220.793	310.508	164.236	289.978	213.112	143.541	120.619	123.676	161.123	28.7014	38.9815
4921524J17Rik	102	101	148	143	153	182	201	176	86	71	960	958	47	73.3234
4921524L21Rik	0	0	2	0	0	0	0	0	0	0	0	0	0	0
4921525O09Rik	2	0	1	7	0	3	0	0	1	0	0	1	0	0
4921529L05Rik	59.9253	40.9013	20.9425	57.8287	42.2793	15.9208	26.7869	13.8114	37.055	21.0203	2.38361	39.6254	8.69393	8.26377
4921530L21Rik	1	8	8	4	0	0	0	0	0	0	0	0	0	0
4921531C22Rik	120	149	116	166	112	164	82	119	201	138	764	744	15	47
4921531P14Rik	117	122	131	135	140	55	198	55	18	8	164	154	17	26
4921533I20Rik	0	0	0	0	0	0	0	0	0	0	0	0	0	0
4921534H16Rik	30	23	8	39	134	44	97	39	7	10	8	6	22	20
4921536K21Rik	76.1302	111.257	95.1296	134.739	199.538	415.356	135.913	143.214	88	29	352.375	150.07	12.8788	37.2769
4921539E11Rik	32	15	14	37	90	12	82	30	0	0	6	6	1	4
4922502B01Rik	21	16	17	19	59	40	42	44	6	2	14	17	8	7
4922502D21Rik	22	30	17	22	16	24	62	0	0	0	9	7	0	0
4922502H24Rik	0	0	0	0	0	0	0	0	0	0	0	0	0	0
4922502N22Rik	4	47	18	9	9	0	41	13	0	1	24	16	0	0
4930401C15Rik	0	0	0	0	0	0	0	0	0	0	0	0	0	0
4930401O10Rik	0	0	0	0	0	3	0	0	0	0	0	0	1	0
4930401O12Rik	1	0	5	0	4	0	12	1	0	0	0	0	0	0
4930402F06Rik	0	0	0	1	5	0	0	0	0	0	0	0	0	0
4930402F11Rik	1	24	6	7	43	29	41	21	0	1	2	0	1	2
4930402H24Rik	1306.16	1282.95	1218.85	1384.39	1606.87	1269.99	1755	1526.11	879.96	641.627	5896.8	6891.26	348.375	540.098
4930402K13Rik	1	0	1	0	1	0	6	25	1	1	2	1	1	0
4930404A05Rik	0	0	0	0	0	0	0	0	0	0	0	3	0	0
4930404H11Rik	1	0	0	0	1	0	0	0	0	0	3	5	1	2
4930404I05Rik	8	20	4	13	13	15	9	17	1	5	172	143	0	4
4930404N11Rik	2.90693	1.17083	0	0	0	0	2.57371	0	0	0	0	0	0	0
4930405A10Rik	2	0	0	0	1	9	4	0	0	0	0	0	0	0
4930405A21Rik	24	22	13	39	45	30	22	15	10	3	11	16	3	4
4930405D11Rik	0	0	0	0	0	0	1	0	0	0	0	0	0	0
4930405J17Rik	6	16	12	23	26	22	21	8	8	5	1	0	2	2
4930405L22Rik	0	1	0	0	0	0	1	1	0	0	0	0	0	0
4930405O22Rik	20	34	47	33	82	34	26	41	6	22	5	7	8	8
4930406D18Rik	0	0	0	0	0	10	2	0	0	0	0	0	0	0
4930407G08Rik	0	0	0	0	0	0	1	0	0	0	0	0	0	0
4930407I10Rik	10	1	0	2	6	21	0	0	1	1	12	2	1	3
4930407I19Rik	0	0	2	1	1	0	2	0	0	0	0	0	0	0
4930412B13Rik	0	0	0	0	0	0	0	0	0	0	0	0	0	1
4930412C18Rik	8	37	40	10	33	14	24	12	15	10	172	119	23	36
4930412O13Rik	22.2277	35.2745	31	26	58.8931	49	32	44.7034	15	12	1	52	2	2
4930413E15Rik	0	0	1	0	0	0	18	3	0	0	1	8	0	0
4930413F20Rik	17	21	39	18	41	47	33	27	4	7	2.303	13.581	0	1
4930413G21Rik	59	84	68	78	32	47	32	19	2	2	527	1023	126	189
4930413M19Rik	0	0	0	0	0	0	0	0	0	0	0	0	0	0
4930414N06Rik	5.03679	8	8.16685	5.01423	9	1.00384	7.0252	9.06671	0	5	4.79652	20.6643	1.45405	0
4930415L06Rik	0	0	0	0	0	5	0	0	0	0	0	0	0	0
4930415O20Rik	3	0	0	0	0	0	0	0	2	0	3	0	0	0
4930417O13Rik	0	0	0	0	0	0	1	0	0	0	4	8	1	1
4930417O22Rik	28.4425	28.5541	32.3511	37.0036	58.8999	43.8736	48.1195	42.1563	67.5745	33.2229	11.6795	11.14	20.089	20.9876
4930419G24Rik	0	0	0	1	0	0	2	0	0	0	0	0	0	0
4930422M22Rik	13	19	22	24	17	17	36	16	3	4	79	80	14.464	9.48662
4930423M02Rik	0	0	0	0	0	0	0	0	0	0	0	0	0	0
4930425K10Rik	0	0	0	0	0	0	0	0	0	0	0	0	0	0
4930425L21Rik	0	0	0	0	0	0	0	0	0	0	0	0	0	0
4930425O10Rik	5.01589	8	0	7.09135	15.015	6.06216	11.0562	5.15827	5.06245	2.02019	6.05058	4.08446	0	1.01256
4930426D05Rik	0	1	0	0	0	0	4	0	32.3403	26.4558	7	15	0	1
4930426L09Rik	21	9	7	16	20	3	0	8	2	1	9	17	3	2
4930428D20Rik	0	0	0	0	0	1	0	2	0	0	0	0	0	0
4930428E07Rik	0	0	2.00323	0	0	0	0	0	1	0	0	0	0	0
4930428G15Rik	1.00655	0	0	0	0	4	0	3.0142	0	0	4	6.01261	0	0
4930428O21Rik	0	1	2	0	0	0	0	0	0	0	2	3	0	2
4930429B21Rik	8	9	10	12	8	0	14	5	2	6	9	9	4	3
4930429D17Rik	2	2	2	1	10	1	0	2	2	0	2	0	0	0
4930429F11Rik	0	0	0	0	0	0	0	0	0	0	0	0	1	1
4930429F24Rik	3	4	3	16	2	1	16	10.0853	3	2	19	26	0	0
4930429H19Rik	38.6184	37.8535	72.2834	75.337	106.725	93.1002	88.3273	119.227	30.17	23.7318	610.044	36.8859	8.47564	20.0099
4930430A15Rik	13	10	14	4	6	4	16	0	0	0	0	0	0	0
4930430F08Rik	247.154	283.738	225.42	298.437	376.452	395.784	316.045	146.132	87.5839	63.2218	1649.16	1301.01	52.7737	91.1116
4930430F21Rik	0	0	2	0	0	0	0	0	0	0	0	0	0	0
4930430J02Rik	8	2	7	6	11	3	8	22	0	1	2	4	0	2
4930431F12Rik	170.205	136.525	222.143	217.854	371.897	183.324	290.377	170.005	67.5099	62.2368	51.5639	205.616	12.2466	16.3313
4930431P03Rik	1	0	5.00814	1	2.00516	6.018	7.00987	5	1	0	0	1.00249	0	3
4930431P22Rik	0	0	0	0	0	0	0	0	0	0	0	1	0	0
4930432J09Rik	216.375	187	222.892	254	337.178	250.567	264.204	347.188	52	40.127	16	179	4	10
4930432K21Rik	197	158	257	245	243	269	265	243	74	26	1649	1267	96	151
4930432L08Rik	75.8615	61.2247	68.1499	42.7238	63.8142	48.512	76.0325	100.399	33.6813	17.2411	51.1885	51.5439	10.0437	11.2635
4930432M17Rik	0	1	0	0	7	0	0	0	0	0	2	0	0	0
4930432O09Rik	6	12	18	2	2	21	12	5	0	1	6	0	1	3
4930433B08Rik	0	0	0	0	0	0	0	0	0	0	0	0	0	1
4930433I11Rik	13.9753	12	16	20.4616	24	23.7425	66.2875	5	1	3	5.58537	12.6024	3.68173	9.07195
4930433N12Rik	92	150	93	110	99	90	143	104	12	13	60	104	8	15
4930434J06Rik	0	0	2	0	0	0	0	0	0	4	0	0	0	0
4930435E12Rik	6	0	7	0	0	3	3	0	0	0	0	0	0	0
4930435F18Rik	1328.9	1568.11	1533.87	1897.74	2847.65	1883.58	1871.24	2039.42	882.485	739.118	506.197	943.267	71.1654	98.6583
4930438E09Rik	1	0	3	1	0	0	1	4	0	0	0	0	0	0
4930440C22Rik	0	0	0	0	0	0	1	0	0	0	0	0	0	0
4930440I19Rik	3	1	1	0	6	3	5	1	0	0	1	2	0	0
4930441H08Rik	1	0	3	0	0	2	2	0	1	0	0	0	0	0
4930441J16Rik	4	0	0	1	0	0	0	0	0	0	0	0	0	0
4930442J19Rik	1	15.8512	13.1568	9	4	13.432	1.37552	12	0	0	3.51002	0	2.74689	2.47558
4930442L01Rik	10	5	0	5	2	26	4	0	1	2	4	3.08176	0	0
4930443O20Rik	3	1	5	3	4	0	3	3	20	0	5	6	2	2
4930444F02Rik	12	20	16	27	11	58	0	42	0	1	23	18	1	2
4930444G20Rik	9.73052	26.41	10.0813	13.1703	26.3347	25.465	10.9139	26.5106	6.64702	7.7471	18.7428	32.3178	0	0
4930444M15Rik	0	1	0	0	0	0	0	0	6	3	11	0	0	0
4930444P10Rik	35.7782	25.5914	28.5465	40.5481	70.5684	51.8027	73.2143	37.0212	15.5102	17.0303	23.5218	13.0737	5.88194	14.7561
4930445N18Rik	0	0	0	0	0	0	0	0	0	0	0	1	0	0
4930447A16Rik	0	0	0	0	0	0	0	0	0	1	0	0	0	0
4930447C04Rik	726	1054	984	879	929	933	599	915	82	55	5326	3492	237	446
4930447F24Rik	1	0	0	0	0	0	0	6	9	0	7	7	0	0
4930447J18Rik	0	0	0	0	0	0	0	0	0	0	0	0	0	0
4930447K03Rik	0	0	0	0	0	0	2.08474	0	0	0	9.10295	0	2	3
4930447M23Rik	0	0	0	0	0	0	0	0	1	0	0	0	0	0
4930447N08Rik	7	13	10	8	37	30	10	13	12	3	5.14995	0	0	0
4930448C13Rik	5	0	11	0	0	0	0	0	0	0	0	0	0	0
4930448F12Rik	0	0	0	1	0	0	0	0	0	0	3	3	0	0
4930448H16Rik	3	5	1	0	0	1	3	0	0	0	3	7	0	1
4930448I06Rik	26	25	26	27	55	43	36	15	3	3	0	10	0	0
4930448I18Rik	2	0	2	3	0	0	0	0	4	0	1	0	0	0
4930448K20Rik	5.39502	8	11	7	19	14	12	6	4	1	0	0	0	1
4930449E01Rik	0	0	0	0	2	0	0	0	0	0	0	0	0	0
4930449E18Rik	0	0	1	0	0	0	0	0	0	0	0	0	0	0
4930449I24Rik	0	8.08115e-08	0	0	0	0	8	0	0	0	0	0	0	0
4930451G09Rik	156	145	192	158	189	67	145	125	64	43	378	429	31	31
4930451I11Rik	1	0	0	0	0	0	14	0	0	0	0	0	0	0
4930452A19Rik	0	0	0	0	0	0	0	0	0	0	0	0	0	0
4930452B06Rik	432	787	702	574	842	1021	753	700	184	96	2424	2038	189	290
4930452G13Rik	17	37	10	23	0	0	0	7	0	0	1	0	18	15
4930452N14Rik	1	0	0	0	0	0	0	0	0	0	1	0	0	0
4930453H23Rik	0	4	1	0	0	2	2	0	0	0	0	1	0	0
4930453L07Rik	22	28	46	27	82	45	51	67	13	7	2	21	0	0
4930453N24Rik	551	565	447	522	436	496	723	362	261	148	2294	2095	190.808	268.285
4930455B14Rik	0	0	2	4	2	0	5	8	0	0	2	0	0	0
4930455C13Rik	12.5489	35.3769	22.7621	30.7255	34.4326	46.6868	42.1728	50.1005	15.5572	4.47285	4.75374	11.1666	5.15248	1.42363
4930455D15Rik	4	2	2	2	21	7	4	33	0	0	7	4	2	2
4930455F16Rik	0	11	2	0	0	0	6	0	0	0	0	2	0	0
4930455G09Rik	2	3	2	9	1	2	3	0	0	0	18	21	0	1
4930455H04Rik	0	0	0	1	0	0	0	0	0	0	1.25992	0	0	0
4930455J16Rik	7	0	0	0	5	0	2	0	0	0	0	0	0	0
4930456L15Rik	6	6	4	7	15	7	9	18	2	0	7	10	0	1
4930459C07Rik	0	0	0	0	0	0	6	0	0	0	0	0	0	0
4930459L07Rik	0	0	0	0	0	0	0	0	0	0	0	0	0	0
4930461G14Rik	0	0	1	0	6	0	0	0	1	0	2	0	0	0
4930463O16Rik	4	47	24	28	23	9	6	20	1	3	2	7	5	7
4930465K10Rik	56	88	83.9347	99.9511	118.838	89.8397	94.8059	116.959	13	15	39	33	9	15
4930465M20Rik	0	0	0	0	22	0	0	0	0	0	1	0	0	0
4930467D21Rik	26	11	29	40	13	68	38	30	2	6	75	72	7	9
4930467E23Rik	4.77823	36.3513	28.5128	0	32.0718	0	48.5164	15.3184	0	5.99637	17.5007	40.1224	9.41552	0
4930467J12Rik	0	0	0	0	0	0	0	0	0	0	0	0	0	0
4930467K11Rik	0	11	0	2	3	0	2	0	0	0	9	7	0	0
4930469K13Rik	7	18	15	10	38	9	5	7	8	2	9.58617	20	0	0
4930470G03Rik	15.7017	30.9184	28.5104	43.7404	81.0446	31.6283	51.7133	47.4844	7.72716	5.10954	60.1262	72.9262	16.1692	11.3762
4930470H14Rik	2902.66	3050.86	3353.36	3972.43	5414.49	4557.86	3980.6	5084.12	1706.21	1450.49	1438.21	2413.26	625.412	780.645
4930470O06Rik	0	0	0	0	0	0	0	0	0	0	0	0	0	0
4930470P17Rik	26	10	56	16	21	11	43	31	4	0	72	49	13	9
4930471C04Rik	0	0	0	0	0	0	0	0	0	1	0	1	0	0
4930471G03Rik	0	6	4	4	1	0	23	0	0	0	0	0	0	0
4930471G24Rik	0	0	0	1	1	0	0	4	0	0	0	0	0	0
4930471M09Rik	10	0	0	1	0	0	3	22	2	3	9	5	0	0
4930473A02Rik	25.4003	16.3286	21.4602	25.2464	67.174	38.592	46.762	42.862	28.8633	28.4093	37.6209	45.4682	2.20251	4.26639
4930473O22Rik	2	3	1	14	4	3	2	1	0	0	1	0	2	1
4930474G06Rik	32.4202	53.6066	42.7227	88.0635	79.3408	68.1257	66.5669	73.4325	19.395	20.9356	10.9232	31.5099	4.23834	7.21214
4930474H20Rik	5.09526	9.06923	7.26903	11.1263	6.36745	0	6.66882	8.29718	0	0	1.00277	6.04179	0	0
4930474M22Rik	26	6	31	29	48	19	102	82	5	5	2	10	5	5
4930474N05Rik	0	0	0	0	0	0	8	0	0	1	0	0	0	1
4930474N09Rik	3	2	0	0	1	0	6	0	0	1	1	5	1	0
4930477N07Rik	45	16	32	41	69	15	30	46	5	11	47	17	2	4
4930478L05Rik	106	126	145	194	136	181	155	92	46	58	5	19	13	14
4930478P22Rik	0	0	0	0	1	0	0	0	0	0	3	0	0	0
4930479D17Rik	0	0	1	3	0	2	0	0	4	2	18	22	0	0
4930480E11Rik	0	0	0	0	0	0	0	0	0	0	0	0	0	0
4930480G23Rik	4	0	0	0	0	0	0	0	0	0	2	2	0	0
4930480K15Rik	19.2819	16.7511	35.136	13.5214	62.1594	8.85707	12.5141	17.8862	36.2334	21.0199	0	19.2079	21.9052	22.2012
4930480K23Rik	127.072	154.571	145.449	181.149	279.741	257.938	250.136	296.307	76.914	66.4266	243.279	433.714	22.3439	42.2208
4930480M12Rik	12	10.5192	6	6	12.8854	3	16	3.45818	3	9	2.00229	15	0	1
4930481A15Rik	64	57.105	55	93.1637	138	58	86.338	114.535	45	32	141.078	179.096	14	25.7938
4930482G09Rik	3.58425	10.9866	15.8857	12.0215	15.7231	7.37856	5.97207	32.209	1.10367	7.25589	4.12387	28.1753	4.57848	5.48188
4930483J18Rik	13.0679	20.1018	6	8.12346	9	1.00352	7.08783	1.00438	5	6	28.0744	14.0409	0	2.01587
4930483K19Rik	3.01651	5.02532	5.06621	3.05667	4	0	8.10875	9.21111	3.0632	8.28306	50.4432	46.8161	4	4.08828
4930483O08Rik	18	29	19	16	44	17	22	21	5	3	5	10	0	0
4930484H19Rik	0	0	0	0	0	0	7	0	0	0	0	4	1	0
4930486F22Rik	0	2	0	3	13	7	0	4	0	2	0	0	0	0
4930486I03Rik	0	2	1	0	3	0	0	0	0	0	0	0	0	0
4930486L24Rik	2	0	0	5	0	0	0	0	2	7	36	371	1	3
4930487D11Rik	0	0	0	0	0	0	0	0	0	0	0	0	0	0
4930487H11Rik	4	1	3	2	2	14	0	1	5	5	3	1	1	0
4930488B22Rik	3	4	5	15	14	6	16	5	0	0	0	20	1	0
4930488L21Rik	7	3	5	2	3	5	2	0	0	1	0	0	2	6
4930500F04Rik	0	0	0	0	0	0	0	0	0	1	0	0	0	0
4930500G05Rik	9	2	6	3	2	6	7	3	0	1	13	4	1	1
4930500L23Rik	0	0	0	3	0	1	0	2	1	2	0	0	0	1
4930502A04Rik	0	0	0	0	0	0	0	0	0	0	0	0	0	0
4930502E09Rik	9	6	21	9	16	8	19	16	6	8	18	13	1	1
4930502E18Rik	16	36.8666	23	27	6.16	16	41.3343	15.5418	26	8	662.482	469	12	14
4930503B20Rik	1.66773	7	0	6	6	3	5.5005	0	0	1	13	16.9562	3	1.86033
4930503E14Rik	37.2057	58.3468	41.2484	28	41.2325	41.2409	24.7472	6.08483	2.3951	5.56773	332.545	210.993	20.3979	43.1941
4930503E24Rik	0	0	0	0	0	0	1.00091	0	0	0	29.5916	0	0	0
4930503F20Rik	0	0	1	0	0	0	7	10	0	0	0	0	0	0
4930503H13Rik	0	0	0	0	0	0	0	0	0	0	0	0	0	0
4930503L19Rik	302	341	330	321	430	611	357	521	130	87	1457	1285	70	109
4930503O07Rik	0	0	0	0	0	0	0	0	0	0	0	0	0	0
4930504C09Rik	21.0858	26.0375	25.0563	33.1078	49.1212	29.1143	24.0501	36.1073	14.0613	16.0662	71.886	8.30064	3.31206	3.20648
4930504O13Rik	45	34	30	24	14	25	25	9	7	1	121	104	15	4
4930505A04Rik	2	13	10	4	11	10	10	4	0	1	5	3	2	2
4930505G20Rik	0	0	0	0	0	0	0	0	0	0	0	0	0	0
4930505K13Rik	0	0	0	0	0	0	0	0	0	0	0	0	0	0
4930505K14Rik	0	0	0	0	0	0	0	0	0	0	0	0	0	0
4930505N22Rik	0	1	2	1	0	8	8	1	4	2	10.182	8	1	2
4930506A18Rik	0	0	2	2	6	0	9	0	1	1	2	1	0	0
4930506C21Rik	3.05845	15.4878	3.06489	10.1525	58.2796	23.104	27.2644	24.3448	10.5326	3.15075	25.0894	35.1743	0	2.21633
4930507D05Rik	6	36.398	15.1214	9	8.042	0	9.04885	19.1335	28	11	102.733	134.806	12	14.0815
4930507D10Rik	2	0	3	0	0	0	1	0	0	0	0	0	0	0
4930509E16Rik	22	29	26	35	55	31	40	30	33	23	77	103	6	6
4930509G22Rik	195.674	221.827	232.04	247.352	359.592	295.469	305.545	319.987	93.1874	90.3906	266.115	380.192	68.0067	91.4563
4930509J09Rik	4	15	13	9	11	4	14	20	1	0	4	22	2	3
4930509K18Rik	0	0	0	0	0	0	0	0	0	0	0	2	0	0
4930511A02Rik	7	12	0	8	7	3	3	8	2	2	2	0	0	0
4930511A08Rik	2	2	5	6	5	9	4	2	1	0	1	1	1	2
4930511E03Rik	0	0	1	0	0	0	0	0	0	0	0	0	0	0
4930511M06Rik	511.752	493.727	496.583	688.985	1128.4	808.891	978.004	958.954	450.759	410.435	1237	1342.16	606.337	827.007
4930512B01Rik	40.0261	43.1739	84.7455	52.0819	76.7067	61.773	52.3905	77.8528	18.7115	6.94947	11.9891	16.5946	6.86727	12.3317
4930512J16Rik	1	0	0	0	0	0	0	0	25	14	1	2	0	0
4930512M02Rik	76.2441	75.9242	73.1771	97.0158	138.37	146.485	133.782	129.237	70.5756	67.2443	50.7461	78.5885	48.8201	42.9163
4930513D17Rik	0	0	0	0	0	0	4	0	0	0	0	0	0	0
4930513N10Rik	113.175	119.234	127.292	92.1088	66.143	66.1073	98.3626	37.0869	42.2656	31.4182	274.163	373.174	25	49
4930513O06Rik	0	0	0	0	2	0	21	0	0	0	0	0	0	0
4930515B02Rik	0	2	4	7	2	3	8	3	0	0	0	0	0	0
4930515G01Rik	15	6	4	21	9	1	4	27	14	11	70	71	2	5
4930515G16Rik	0	0	0	0	0	0	0	0	0	0	0	0	0	0
4930515L03Rik	0	0	0	0	0	0	0	0	0	0	0	0	0	0
4930515L19Rik	0	2	0	0	0	0	0	0	0	0	0	0	0	0
4930517E11Rik	0	0	0	1	0	0	0	0	0	1	0	0	0	1
4930517M08Rik	37	20	15	27	1	12	0	3	2	0	0	0	1	4
4930518J21Rik	0	0	0	2	0	0	0	0	0	0	0	2	0	0
4930518P08Rik	25	3	14	8	33	8	9	6	0	0	17	23	3	5
4930519D14Rik	2	0	0	0	0	0	0	0	0	0	0	0	0	0
4930519F16Rik	0	0	7	3	0	1	0	0	10	1	4	3	1	2
4930519F24Rik	2	0	0	0	0	0	0	0	0	0	0	0	0	0
4930519G04Rik	37.4209	21.3026	31.4196	17.962	40.1398	29.5483	34.2395	35.5958	28.8306	30.2412	21.9819	42.6991	0	2.86684
4930519H02Rik	17	18	31	21	53	34	43	26	5	7	1	10	2	1
4930519K11Rik	0	0	0	0	0	0	0	0	0	0	0	2	0	0
4930519L02Rik	101.394	120.731	107.473	152.781	210.298	184.069	154.56	184.619	135.448	111.907	68.2342	149.809	34.5276	52.2909
4930520O04Rik	22	41.9999	21	47	21	9	22	9	10	13	123	130	3	9
4930520P13Rik	3	14	5	8	13	14	13	0	4	6	0	3	0	0
4930521E06Rik	0	0	0	0	0	0	0	0	1	0	0	0	0	0
4930521O11Rik	377.939	375.928	386.844	583.681	722.723	537.854	411.48	639.71	235.395	174.709	75.2515	241.862	29.6957	26.1085
4930521O17Rik	0	0	1	0	0	0	0	0	0	0	1	1	0	0
4930522H14Rik	2	4	0	1	0	0	5	0	0	0	0	0	0	0
4930522O17Rik	0	0	0	0	0	0	0	0	0	0	0	0	0	0
4930522P08Rik	4	2	5	2	3	6	4	0	0	0	14	21	0	0
4930523C07Rik	4	15	25.6694	25	14	52	25.669	34	49	43	32.4067	187.998	0	0
4930523O13Rik	1	0	0	1	0	0	13	3	0	0	2	0	0	0
4930524B15Rik	1	14	17	14	7	28	18	0	9	11	315	331	1	7.58879
4930524B17Rik	108.195	83.166	98	93	151	160	95	144	35.1857	24	3.04778	19.0619	7	7
4930524C18Rik	0	0	1	0	0	0	0	0	0	0	0	0	0	0
4930524N10Rik	0	0	0	0	0	0	0	0	0	0	0	0	0	0
4930524O05Rik	1	0	0	0	0	3	0	0	0	2	0	0	0.649654	0
4930524O08Rik	11	20	18	18	42	11	11	15	2	1	2	5	2	2
4930525C09Rik	3	2	2	5	6	0	13	2	0	0	1	0	0	0
4930525D18Rik	13	5	5	15	5	4	1	0	11	0	24	24	3	1
4930525G20Rik	31	33	27	30	56	44.9859	71	13	26.1946	8	29	44	8	3
4930526H09Rik	0	0	0	0	0	0	0	0	0	0	0	0	0	0
4930526I15Rik	23.8575	18.3796	7.9835	16.5844	37.1156	20.0738	4.01288	23.6973	29.0034	25.9907	352.106	347.456	16.2415	34.1059
4930526L06Rik	73	87	81	86	106	78	43	85	34	17	10	53	0	1
4930527F14Rik	1	1	0	1	4	0	1	0	7	0	0	4	0	1
4930527G23Rik	0	0	1	0	0	0	0	0	0	0	0	0	0	0
4930528A17Rik	62.7095	59.1804	73.4468	82.5884	56.0201	141.058	72.8797	83.7213	25.3829	14.2924	113.795	148.435	16.7402	20.7011
4930528D03Rik	89.6534	79.9025	95.5793	109.988	180.09	158.614	120.98	105.287	62.022	39.5522	51.2315	98.2073	28.2629	47.6502
4930528G23Rik	0	0	0	0	0	0	0	0	0	0	0	0	0	0
4930528H21Rik	1	1	0	2	2	0	1	0	0	0	0	0	0	0
4930528P14Rik	0	0	0	0	0	0	0	0	0	0	0	0	0	0
4930529C04Rik	26.0838	33.8282	34.7983	44.5818	54.18	45.343	62.0496	36.3993	9.27334	6.80345	6.3018	26.4755	6.49965	14.8902
4930529K09Rik	0	1	0	0	0	0	0	0	1	1	0	0	0	0
4930529L06Rik	0	0	0	0	0	0	0	0	0	0	0	0	0	0
4930529N20Rik	1	2	0	1	1	1	9	7	0	0	0	0	0	0
4930532I03Rik	41	38	53	48	117	79	105	81	5	10	14	14	4.00715	0
4930532M18Rik	0	0	0	0	0	0	0	0	0	0	0	0	0	0
4930533B01Rik	9	1	1	3	67	27	17	32	3	0	0	0	1	2
4930533N22Rik	164.533	113.029	134.348	210.716	383.682	292.152	303.975	312.85	145.253	125.517	144.979	254.684	74.5824	61.12
4930533P14Rik	0	0	0	0	0	0	0	0	0	0	0	0	0	0
4930534H03Rik	0	0	0	0	0	0	2	0	0	0	0	0	0	0
4930539C22Rik	0	0	0	0	0	0	0	0	0	0	0	0	0	0
4930539E08Rik	322.384	300.621	364.662	365.438	495.92	525.683	515.787	261.027	124.87	97.2229	504.137	529.818	87.9901	145.75
4930539J05Rik	30	23	28	11	23	27	21	26	14	10	54	34	19	21
4930539M17Rik	3	0	0	0	0	0	0	0	0	0	2	21	0	0
4930539N22Rik	8	1	1	9	0	0	2	2	0	1	2	6	0	0
4930540M03Rik	0	0	0	0	0	0	0	0	0	0	0	0	0	0
4930542C21Rik	0	1	0	0	0	0	7	0	1	0	5	5	0	0
4930542D17Rik	4.25359	2	1.08568	7	0	2	10.388	0	0	0	1	0	1	1
4930542M03Rik	4	1	6	5.08939	4	8	19	2.04712	4	3.30666	2	5	0	0
4930543E12Rik	12	1	1	0	9	49	7	8	0	4	16	9	1	3
4930543N07Rik	0	0	0	0	0	0	0	0	0	0	0	0	0	0
4930544D05Rik	0	1	0	0	0	11	0	0	0	0	0	0	0	0
4930544G11Rik	4	7	1	5	0	11	23	6	0	0	8	1	1	1
4930544M13Rik	0	0	0	2	0	0	0	3	0	0	1	0	0	1
4930545E07Rik	0	0	0	0	0	0	0	0	0	0	0	0	0	0
4930545H06Rik	30	8	28	20	29	22	14	25	5	6	0	7	4	2
4930545L23Rik	1.01264	7	1.00267	0	7	0	5	0	0	1.00071	0	0	0	1.0197
4930546C10Rik	0	0	0	0	0	0	0	54	0	0	0	0	0	0
4930546K05Rik	37.1427	35.3395	31.8223	47.0465	65.0622	47.2472	47.3677	42.0435	47.8392	28	12.6727	16.8847	6	3
4930547E08Rik	3	2	1	3	2	12	11	7	1	0	10	8	1	0
4930547E14Rik	5	7	2	9	16	19	11	39	2	3	3	1	2	2
4930548G14Rik	1	14	28	9	10	18	9	2	2	0	0	1	0	0
4930548H24Rik	8	1	1	5	4	0	5	0	4	0	18	16	0	3
4930548J01Rik	2.13532	9	1.00094	2.04372	4.13209	0	9	3	1.01007	3	0	4.04942	0	0
4930548K13Rik	0	0	0	0	0	0	0	0	0	0	0	0	0	0
4930549C15Rik	5	8	9	4	5	6	17	29	4	7	0	1	1	3
4930549G23Rik	13.4559	13.444	13.8983	20.0206	20.6425	62.0845	21.1912	42.2274	0	5.27286	74.4638	55.1363	2.65723	4.4117
4930550C14Rik	32	18	23	4	64	15	48	20	30	29	31	37	8	4
4930550C17Rik	0	0	0	0	0	0	0	0	0	0	0	0	0	0
4930550L24Rik	119	176	159	128	80	229	192	138	87	50	3690	4298	154	249
4930552N02Rik	0	0	0	0	0	0	1	0	0	0	0	0	0	0
4930552P12Rik	26	18	13	27	39	123	15	30	3	4	63	75	11	21
4930553C11Rik	14	10	7	10	14	17	27	26	3	5	3	3	2	3
4930553E22Rik	0	0	0	0	0	0	0	0	0	0	0	0	0	0
4930553J12Rik	0	0	0	0	0	0	4	0	0	0	0	0	0	0
4930553P18Rik	5.28838	12.0409	6.77299	19.3971	8.49137	17.6517	3.10626	5.6186	12.1561	1.04656	11.2087	15.7536	6.10476	7.80736
4930554C24Rik	0	0	0	0	0	0	0	0	0	0	0	0	0	0
4930554G24Rik	4	15	11	16	31	12	25	34	1	5	1	9	3	2
4930554H23Rik	2	13	25	23	19	33	30	19	4	1	3	54	1	0
4930554I06Rik	3	0	0	2	3	0	1	0	0	0	2	2	1	0
4930555B11Rik	0	0	0	0	0	0	0	0	0	0	1	0	0	0
4930555B12Rik	0	0	0	0	0	0	0	0	0	0	0	0	0	0
4930555G01Rik	4.64936	2.36934	9.34588	2.02181	0	1.01526	5.09361	2.03272	8.54461	11.4164	72.1321	19.2116	1.35964	1.60821
4930555G21Rik	0	0	0	0	0	0	0	0	0	0	0	0	0	0
4930555K05Rik	0	0	0	0	0	0	0	0	0	0	0	0	0	0
4930555K19Rik	0	0	0	0	3	0	0	1.00478	0	0	0	0	0	0
4930556C24Rik	12	3	2	5	0	0	0	0	0	3	9	2	6	4
4930556G01Rik	0	1	0	0	0	0	0	0	0	0	0	0	0	0
4930556J02Rik	3	1	0	0	0	0	7	0	0	0	0	0	0	0
4930556L07Rik	1	3	0	2	1	0	0	0	0	0	2	1	0	2
4930556M19Rik	173.725	186.233	189.396	199.075	233.401	229.084	235.44	259.601	86.3958	70.5744	282.207	259.985	45.7003	58.9249
4930556N09Rik	1	0	0	0	0	0	0	0	0	0	0	0	0	0
4930556N13Rik	55	60	53	76.7717	110	32	115	85	11	14	20	43	5	15
4930557F10Rik	0	0	0	0	0	0	25	0	0	0	1	2	0	0
4930557J02Rik	3	5	2	0	0	2	0	0	8	2	0	0	1.06967	0
4930557K07Rik	2	2	5	2	11	6	5	6	7	1	5	33	2	0
4930558C23Rik	6	3	0	0	8	0	44	0	0	0	0	0	0	1
4930558F17Rik	1	3	6	2	12	14	10	4	0	0	0	5	0	0
4930558G05Rik	0	1	1	4	0	1	0	0	0	2	0	0	0	0
4930558J18Rik	74	100	100	99	111	202	124	68	59	26	468	421	14	26
4930558K02Rik	26	14	8	17	62	4	16.9999	17	1	0	18	11	2	3
4930559C10Rik	0	0	0	0	0	0	0	0	0	0	0	0	0	0
4930562C15Rik	11	8	37	38	45	17	41	43	44	38	33	82	6	7
4930562F07Rik	0	0	1.33067	0	0	0	1.33098	0	0	0	6.59329	14.0016	0	1
4930563E18Rik	45.5357	65.8034	55.3039	48.8455	54.6187	93.1587	44.4022	26.7849	31.9316	12.7042	45.1288	41.1926	12.8357	12.3142
4930563E22Rik	151.917	108.342	128.273	161.672	167.045	186.611	124.815	70.547	14.9728	14.926	740.246	486.622	68.2467	69.3697
4930563F08Rik	13	17	21	32	18	41	21	22	1	10	0	0	3	6
4930563H07Rik	0	0	0	0	0	0	0	0	0	0	0	0	0	0
4930563J15Rik	22	3	14	7	8	2	12	3	12	2	4	14	1	3
4930563M20Rik	13	14	29	26	42	36	43	26	5	4	22	50	3	5
4930563M21Rik	7	16	11	15	35	29	23	8	4	2	14	11	1	0
4930564C03Rik	9	11	0	18	16	11	17	3	12	4	0	0	1	5
4930564D02Rik	5	0	4	1	1	5	0	8	0	0	0	0	0	0
4930565D16Rik	0	0	0	0	0	0	0	0	0	0	0	0	0	0
4930565N06Rik	652.801	766.736	734.973	537.268	1107.75	925.4	894.97	665.239	237.71	159.177	450.014	632.517	72.0841	126.875
4930567H12Rik	1	0	1	0	0	0	5	0	0	0	0	2	0	1
4930567H17Rik	0	0	0	0	0	0	0	0	0	0	0	0	0	0
4930567J20Rik	0	0	0	0	0	0	0	0	0	0	0	0	0	0
4930567K12Rik	0	0	0	0	13	0	0	0	1	0	0	0	0	0
4930567K20Rik	0	5	2	0	0	1	0	0	0	0	0	0	0	0
4930568D16Rik	0	1	0	0	0	0	0	0	0	0	0	0	0	0
4930568E12Rik	4	9	6	3	0	9	4	3	2	0	1	3	0	2
4930568G15Rik	3	1	4	0	0	22	3	0	0	3	3	0	0	0
4930570G19Rik	69	18	46	85	105	76	70	83	2	8	19	48	1	10
4930571K23Rik	5	5	0	0	0	37	13	0	0	0	0	0	0	0
4930571O06Rik	4.22347	8.66611	6.25993	4.34271	11.5962	15.7521	7.21532	5.1549	4.13943	1.05988	1.23825	2.05352	1.07438	1.28801
4930572K03Rik	2	1	0	22	0	2	1	3	0	0	0	0	0	0
4930572O03Rik	6.39493	4.76613	0	14.617	20.4887	12.1432	4.76997	18.7529	0	0	0	8.65501	0	0
4930572O13Rik	7	0	9	0	0	1	0	0	0	0	0	2	0	0
4930573H18Rik	4.21056	1.18999	5.72584	8.74224	7.29157	7.32584	10.7206	7.4868	2.25372	1	2.06917	4.05039	0	0
4930573O16Rik	0	0	0	0	0	0	0	0	0	0	0	0	0	0
4930577N17Rik	25.8205	13.442	23.0389	40.3847	32.1841	17.4366	51.106	36.3888	22.3222	22.5921	120.856	194.426	17	25.5363
4930578C19Rik	1.001	7.01483	2.00127	5.00819	6.01541	0	1.00113	1.00188	15.0142	6.01773	1	9.00292	1.00095	0
4930578E11Rik	94.9156	85.6923	91.9324	88.1268	150.197	102.684	133.148	122.623	57.7496	43.9017	37.4813	84.5735	17.6009	21.5337
4930578G10Rik	0	0	5.33367	3.44119	0	0	3.10872	6.35659	24.9248	17.0464	20.5589	52.6121	0	0
4930578I06Rik	10	6	2	0	0	0	7	0	1	0	1	0	0	0
4930578L24Rik	138.985	130.326	105.326	159.234	130.15	154.307	152.759	223.4	36.4049	46.8365	492.101	353.397	25.6577	40.8414
4930578M01Rik	2.02396	1.43942	0	1.01473	4.27518	2.30666	7.17606	7.41113	0	1.81436	0	7.60768	6.34143	3.86546
4930578N18Rik	0	0	0	0	0	0	0	0	0	0	0	0	0	0
4930579D09Rik	0	0	0	0	0	0	0	0	0	0	0	0	0	0
4930579F01Rik	7	12	4	6	3	6	36	0	13	2	2	3	1	0
4930579G18Rik	226.21	156.764	196.099	183.027	254.249	205.038	210.664	241.145	94.4753	83.6852	183.839	337.26	26.5911	38.1587
4930579G24Rik	247.09	229.98	312.137	263.603	369.765	303.847	451.145	197.701	219.699	118.343	2145.42	1504.17	56.6762	98.0887
4930579H20Rik	0	4.00627	3.0107	5.01485	3.01364	0	2.0064	2.01532	12.0107	7.00826	1.0068	0	0	0
4930579J19Rik	1	0	0	0	0	0	0	0	0	3	0	0	1	2
4930579K19Rik	60	45	72	68	34	26	58	17	6	9	218	156	20	15
4930579P08Rik	0	0	0	0	0	0	0	0	0	0	0	0	0	0
4930581F22Rik	46	42	52	43	42	30	114	25	14	21	78	161	12	20
4930583I09Rik	0	0	0	0	0	0	0	0	0	0	0	0	0	0
4930583K01Rik	1	3	0	8	5	3	1	2	4	0	7	4	0	2
4930583P06Rik	0	2	0	2	3	0	4	15	0	0	0	3	0	0
4930584F24Rik	0	2	4	2	3	0	22	0	0	0	0	0	0	0
4930586N03Rik	0	0	0	0	1	0	3	0	0	1	0	3.00606	0	0
4930587E11Rik	2	0	0	3	5	12	8	0	1	0	2	0	1	0
4930589L23Rik	17	17	2	23	3	27	1	0	7	8	33	14	2	8
4930590A17Rik	0	0	0	0	0	0	0	0	0	0	0	0	0	0
4930590J08Rik	6	35	22	2	14	18	84	20	14	11	7	5	0	0
4930590L20Rik	86	63	45	55	48	27	49	42.9178	4	3	4.34517	23	2	0
4930591A17Rik	31	26	36	40	56	81	68	22	1	0	15	13	8	12
4930591E09Rik	0	0	0	0	0	0	0	0	0	0	0	0	0	0
4930592A05Rik	0	0	0	2	1	0	0	0	3.55962	3.71474	0	0	0	0
4930592C13Rik	3	0	1	5	0	0	2	1	7	0	29	23	1	1
4930592I03Rik	5	2	4	7	0	1	7	1	0	3	0	3	2	4
4930593A02Rik	1	0	5	2	1	0	0	0	2	0	3	0	1	1
4930593C16Rik	14	7	13	27	21	21	25	21	3	3	2	5	0	0
4930594C11Rik	99.2365	75.3376	110.367	86.5258	223.692	122.578	178.772	165.471	26.0746	18.6574	54.0135	30.7167	22.0916	29.1139
4930594M22Rik	255.497	267.783	298.695	225.582	281.515	272.199	341.19	284.338	89.0436	63.5963	499.715	449.553	60.843	90.3089
4930594O21Rik	0	2	1	1	0	8	9	7	8	0	0	2	0	1
4930595D18Rik	8	2	12	7	17	5	22	5	3	0	1	0	6	2
4930595M18Rik	0	0	0	0	0	0	3	0	0	0	0	7	0	0
4930596D02Rik	6	3	0	0	13	0	7	0	0	0	0	0	0	0
4930596I21Rik	16	9	28	22	53	20	29	44	3	7	2	13	1	0
4930597A21Rik	0	0	0	0	0	0	0	0	0	1	0	0	0	0
4930597G03Rik	4	9	14	14	52	43	30	58	1	0	0	7	0	0
4930598F16Rik	0	0	0	0	0	0	0	0	0	0	0	0	0	0
4930599N23Rik	16.9379	18.0741	9.73985	19.0169	31.2178	3.33945	13.7524	2.48535	9.826	3.49611	96.8132	117.918	13.9649	5.15338
4931402G19Rik	27.7033	39.659	56.6561	54.6084	113.769	41.1609	104.312	94.5883	47.8146	18.8351	20.7064	119.67	3.40252	14.6624
4931403E22Rik	10	1	7	0	19	2	11	12	2	0	6	15	1	1
4931403G20Rik	13	31	32	20	47	53	22	8	19	6	3.04837	7	6.06597	12.1653
4931406B18Rik	70.8581	44.4362	44.0277	88.2244	95.6944	51.5841	111.849	60.6767	47.06	29.8585	61.7737	79.2727	23.0039	25.0191
4931406C07Rik	591.176	501.063	506.062	589.035	512.14	588.006	567	603.077	1395	917	2491.99	2895	78	141
4931406H21Rik	77.0661	29.2988	63.0693	66.3928	144.134	66.5899	141.347	168.579	112.333	102.525	14	37.4375	16	25
4931406P16Rik	3045	2852	3208	3119	3181	2730	2850	2615	2459	1169	18859	20552	513	834
4931408C20Rik	1	0	5	1	5	37	1	19	0	0	2	2	2	2
4931408D14Rik	34.506	60.4978	38.4826	42.8665	63.8385	111.9	45.1521	77.5673	15.0623	13.2352	45.1003	59.2184	6.00865	5.05135
4931409K22Rik	7	1	5	1	13	21	4	0	8	4	80	48	0	2
4931414P19Rik	80	65	54	66	50	79	76	22	49	23	1095	977	43	61
4931417E11Rik	0	2	3	0	0	0	21	0	0	0	0	0	0	0
4931419H13Rik	0	13	0	1	2	0	6	0	0	0	6	4	0	0
4931420L22Rik	41	17	23	29	37	32	42	25	1	10	3	26	4	3
4931422A03Rik	27.3235	25	25.101	32	69.16	72.855	33.1253	39.0594	3.01769	3.02032	4.19338	25.419	7	7
4931423N10Rik	0	0	2	4	3	0	0	5	2	9	5	1	0	0
4931428F04Rik	543.714	410.098	409.213	351.113	299.911	833.572	289.628	435.866	117.378	179.937	2447.85	2384.73	179.755	311.765
4931428L18Rik	215.806	235.958	234.888	263.85	518.488	410.484	362.812	438.574	79	67	76.9407	123.991	13.9343	4.84749
4931429L15Rik	5.10019	4.0916	7.29934	12.4774	16.6008	5.18172	7.42534	3.12009	2.05761	7.41499	13.6045	8.31715	2.08571	4.19695
4931429P17Rik	0	0	0	0	0	0	0	0	0	0	0	0	0	0
4931430N09Rik	37	36	25	59	189	58	87	118	30	15	0	4	9	7
4931431B13Rik	0	0	0	0	0	0	2	0	0	0	0	0	0	0
4931431C16Rik	6.39665	13.1972	8.44905	10.6766	14.5175	2.26569	9.54401	7.31702	22.0131	9.55896	9.72786	8.26597	3.29452	2.34888
4931440F15Rik	15	8.12709	9.24787	22	1.03717	5.28921	8.06028	20.3956	2.2547	5.59323	15.7728	27.0761	9.82656	4.48124
4931440J10Rik	0	1	1	1	0	0	4	0	1	0	4.00882	8	0	4
4931440P22Rik	32.2219	42.3013	23.1581	28.0724	27.2466	36.5208	52.6315	44.486	8.08812	4.05141	112.036	187.424	27	37
4932411N23Rik	22	11	24	22	31	30	29	20	8	10	10	15	3	2
4932412D23Rik	18.7518	2	8.00075	30.7982	14.5075	3.31217	13	26.601	2	8	94	36	4	7
4932413F04Rik	11	18	15	12	39	6	64	32	12	2	5	8	15	19
4932414J04Rik	0	0	3	2	2	0	10	1	0	0	0	0	0	0
4932414N04Rik	52.0622	39.0995	41.0581	48.0857	64.2506	40.043	78.1473	63.341	24	8.01164	10.0072	31.0185	6	4.00635
4932415M13Rik	3	4	3	2	4	0	53	1	0	0	2	1	1	0
4932429P05Rik	0	0	0	0	0	0	0	0	0	0	0	0	0	0
4932435O22Rik	41.8866	63.012	159.722	68.4994	106.612	60.7181	37.2934	37	16.0268	3	43.2667	50.0587	35	53.0942
4932438A13Rik	14278	15268	17526	17895	36263	29940	30926	28701	4830	2846	48003	44931	4321	6063
4932438H23Rik	0	0	18	12	2	0	2	0	10	17	5	2	1	2
4932441J04Rik	0	0	0	0	0	0	0	0	0	0	0	7	0	0
4932702P03Rik	0.766981	2	0	0	5.202	0	1.46437	0	25.0894	18.3919	0	3.92275	0	0
4933400A11Rik	0	0	0	0	0	14	0	0	0	0	0	0	0	0
4933400B14Rik	0	0	0	0	0	0	0	0	0	0	0	0	0	0
4933400C23Rik	0	0	0	0	0	0	0	0	5	7	0	0	0	0
4933400F21Rik	180	137	156	172	313	198	243	284	46	49	5	12	48	54
4933400L20Rik	0	0	0	0	0	6	0	0	0	0	0	0	0	0
4933401B06Rik	1	0	0	0	0	0	0	0	0	0	1	0	0	0
4933401D09Rik	15.0318	22.094	51	32.1211	56.3874	60	27.213	32	27.2285	26	23.5507	71.3853	5.01148	11.8421
4933401H06Rik	0	0	5	3	1	22	5	0	0	0	0	0	0	0
4933402C06Rik	0	0	0	0	0	0	0	0	0	0	0	0	0	0
4933402D24Rik	0	4	0	3	4	9	3	4	7	7	2	5	0	0
4933402E13Rik	0	11	2	0	3	0	0	0	28	19	163	2104	4.53562	6
4933402J07Rik	11	14	19	6	23	56	72	0	5	1	16	20	5	6
4933402J10Rik	10	3	1	0	25	3	4	1	0	0	0	0	0	0
4933402J15Rik	0	0	0	0	1	3	0	0	0	0	1	0	0	0
4933402N03Rik	0	0	0	0	0	0	5	0	0	0	0	0	0	0
4933402N22Rik	0.863981	3.50776	3.14912	1.70082	9.66151	6.04349	8.8869	0	0	0	0	0	0	0
4933403O08Rik	190	301	274	171	102	195	174	137	32	34	312	312	46	45
4933404G15Rik	0	0	0	0	0	0	4	0	0	0	0	0	0	0
4933404K08Rik	102	91	95	129	128	123	118	187	33	31	19	159	10	10
4933404K13Rik	18	6	10	2	1	2	9	4	4	0	9	8	1	1
4933404O12Rik	253.198	146.642	229.563	235.141	261.49	309.576	230.464	189.656	210.375	140.187	594.032	553.934	29.8077	56.1647
4933405D12Rik	25.7095	12.5524	10.0126	17.4139	22.6738	24.3542	16.7038	18.6452	8.49835	8.51001	36.4421	39.2932	2.3561	8.18098
4933405E24Rik	0	0	0	0	0	0	0	0	1	0	0	0	0	0
4933405L10Rik	7	6	5	10	1	0	8	0	3	8	37	27	2	0
4933405O20Rik	3	0	1	0	4	0	16	2	0	0	0	0	0	0
4933406C10Rik	29	33	22	16	92	46	63	37	9	4	55	48	5	21
4933406D12Rik	0	0	0	0	0	0	0	0	0	0	0	0	0	0
4933406F09Rik	1	11	12	4	4	4	8	0	8	2	3	6	0	0
4933406G16Rik	0	4	0	0	0	0	1	0	0	0	0	0	0	0
4933406I18Rik	15	10	7	4	20	1	4	11	1	2	28	28	0	0
4933406J09Rik	0	0	1	10	1	0	2	0	0	0	4	2	0	1
4933406J10Rik	28	13	18	9	28	17	48	53	9	10	2	3	0	4
4933406K04Rik	4	0	14	6	45	14	40	14	0	0	4	17	1	4
4933406M09Rik	31	47	66	42	88	38	23	33	0	9	22	16	15	20
4933407E24Rik	0	2	2	3	8	0	8	1	1	0	0	0	1	8
4933407G14Rik	79	43.1499	57	73	126	84	40	80	21	18	6	44	3	4
4933407I05Rik	0	0	0	0	0	0	0	0	17	4	0	0	0	0
4933407K13Rik	111	148	134	156	153	221	54	191	73	83	569	608	20	32
4933407L21Rik	2	0	17	2	28	0	7	33	0	3	1	3	3	0
4933408B17Rik	15	29	55	45	61	41	49	103	19	13	53	103	0	6
4933408J17Rik	30.0174	29.0153	16	39	19	10	22	8	8	7	93	63	7	6
4933408N05Rik	268.405	274.246	304.221	338.546	738.349	453.087	484.141	472.703	168.342	98.316	82.6366	225.636	24.2735	27.5824
4933409F18Rik	0	0	0	0	0	0	1	0	0	0	0	3	0	0
4933409G03Rik	7	27	67	24	10	7	6	14	0	0	0	0	0	4
4933409K07Rik	468.032	378.234	501.373	503.086	754.146	442.863	429.206	582.393	1097.42	941.771	862.367	1586.08	220.751	267.477
4933411E08Rik	24.2426	20.3897	17.7808	43.9524	31.255	22.4042	33.2845	23.855	8.32941	8.06007	6.13364	9.42165	3.24602	3.2926
4933411G06Rik	4	0	0	0	0	0	13	0	0	0	0	0	0	0
4933411K16Rik	9	31	14	7	4	12	21	1	0	1	3	3	0	1
4933412E12Rik	361	297	450	296	483	495	425	431	23	16	445	334	80	108
4933412E24Rik	12	13	13	20	10	30	7	5	5	2	83	55	11	10
4933412O06Rik	1	0	0	0	4	0	2	0	2	0	0	0	0	0
4933413J09Rik	56.1999	53.3454	55.2733	77	78.7213	94	81.3968	114.039	143.721	136	64.0222	306.262	4	6
4933413L06Rik	18	25	25.4975	29	54.2912	45	42.5486	59.3565	2	2	7.1763	10	6	18.0682
4933415F23Rik	17	4.00569	9.04358	6	13.1335	42	15.0306	8	1.00292	0	66.0038	63.0047	1.00851	2.43176
4933416C03Rik	161	172	182	147	173	252	157	177	75	25	1994	1523	54	93
4933416E03Rik	0	0	0	0	1	0	2	0	0	0	0	0	0	0
4933416I08Rik	0	0	0	0	4	0	0	0	0	3	0	11.6838	0	0
4933416M06Rik	0	0	0	0	1	2	0	1	0	0	0	0	0	0
4933416M07Rik	80.8317	60.2925	53.8378	36.6806	48.3872	69.2611	55.5433	74.3588	24.7151	9.15522	393.411	285.374	19.2716	34.2332
4933416O17Rik	0	0	3	0	0	0	0	10	0	0	0	0	0	0
4933417A18Rik	1	0	2	0	1	12	2	0	0	1	0	0	0	0
4933417D19Rik	10	7	6	14	6	5	36	14	10	5	95	79	3	5
4933417E11Rik	1	0	0	0	9	0	0	0	0	0	5	1	1	1
4933417G07Rik	0	6	1	17	12	16	13	9	5.03059	6.02772	0	0	2.01357	1.92359
4933417O13Rik	4	0	1	3	2	0	9	0	0	0	1	1	1	2
4933421I07Rik	0	0	1	2	0	0	1	0	0	0	1.73737	5	0	0
4933421O10Rik	404.743	337.951	343.515	427.776	696.117	477.048	580.363	488.182	190.495	210.786	273.721	534.422	54.7811	77.6939
4933422A05Rik	2	0	0	1	6	7	0	0	0	0	4	5	1	2
4933424G05Rik	5	6	6	8	5	7	5	0	7	14	22	10	0	1
4933424G06Rik	1	5	1	1	0	0	2	4	0	2	6	3	1	0
4933424L21Rik	2	9	8	11	4	0	10	5	2	0	3	0	1	4
4933425B07Rik	0	1	2	0	0	4	0	0	0	0	2	0	0	0
4933425L06Rik	211	210	129	154	175	147	239	71	41	17	504	404	67	84
4933427D06Rik	1164.34	1269.24	1048	1308.15	1129.28	1073.83	876.648	949.926	921.401	535.61	8115.27	5827.85	182.888	288.342
4933427D14Rik	317.701	368.712	402.525	406.341	406.845	407.265	588.557	328.351	147.973	111.421	1744.21	1638.76	170.507	215.597
4933427E11Rik	17	13	6	9	38	19	7	4	6	1	50	43	2	4
4933427E13Rik	0	0	0	0	0	0	0	0	0	0	1	0	0	0
4933427I22Rik	9	3	4	12	12	0	10	9	0	0	0	2	1	0
4933428C19Rik	1	0	0	0	0	0	4	0	0	0	0	3	0	2
4933428G20Rik	43.3811	63.2397	57.0604	20	15	13.2048	47.4373	48	36	23	33.3665	50.4078	1.11241	5.69592
4933428M09Rik	7	5	2	7	3	4	4	12	0	1	74	55	5	8
4933429K18Rik	0	0	2	0	0	0	0	0	1	0	3	1	0	0
4933429O19Rik	12.3814	8.14318	3.95921	16.3192	9.79841	2.63097	18.2764	23.4194	0	3	2	9.34871	0	0
4933430H16Rik	18	35	18	24	33	42	29	49	5	1	65	42	12	16
4933430I17Rik	40	33	41	49.0001	28	24	59	74.9999	33	19	359	246	11	21
4933430M04Rik	0	0	0	0	0	1	0	0	0	0	0	0	2	1
4933430N04Rik	0	2	0	0	0	0	0	0	0	0	0	0	0	0
4933431E20Rik	858.193	719.692	835.222	769.915	788.605	580.529	807.737	519.76	384.846	215.885	2184.03	2417.35	164.159	236.039
4933431G14Rik	30	31	111	100	199	65	73	129	56	20	14	35	8	12
4933432G23Rik	3	2	1	1	7	12	6	9	0	0	1	3	0	0
4933432I03Rik	0	5	0	8	34	3	0	0	1	1	4	3	0	0
4933432I09Rik	0	0	1	3	1	0	16	0	9	10	8	4	1	2
4933432K03Rik	15	4	20	11	57	49	56	26	3	2	6	10	1	3
4933433F19Rik	0	5	0	0	0	0	2	0	0	0	0	0	0	0
4933433G08Rik	0	0	0	0	4	0	0	0	3	0	0	0	0	0
4933433G15Rik	83.8388	52.9489	85.9065	44.6087	36.7953	10.4362	61.6549	76.2096	31.6895	16.1822	165.822	197.775	15.9569	18.8142
4933433G19Rik	6	8	13	21	10.0857	19	12	11	16.0919	11.0887	7.59594	24.0624	1	2
4933433H22Rik	0	0	0	0	0	0	0	0	0	0	0	1	0	0
4933434E20Rik	979	814	888.001	907	1500	1368	1800	1372	449.704	271	6936.39	5811.91	399.599	545.722
4933436E23Rik	0	0	0	0	0	0	0	0	0	0	0	0	0	0
4933436H12Rik	0	0	0	0	0	0	0	0	0	0	0	0	0	0
4933436I01Rik	0	0	1	0	0	0	2	0	0	0	0	0	0	0
4933438B17Rik	2	9	0	2	1	0	8	2	7	3	7	6	0	0
4933438K21Rik	272.054	336.624	368.285	363.048	497.018	330.443	464.5	329.563	122.039	81.0743	257.572	615.944	31.9176	45.1381
4933439C10Rik	34	59.9774	65	22.5212	55.9546	56.0009	32	32.0175	40.1443	38.9723	383.095	468.157	12.8325	12.1239
4933439K11Rik	0	1	2	2	7	0	12	0	0	0	12	6	0	2
4933440J02Rik	36	37	27	43	76	20	38	27	1	5	12	3	5	4
4933440M02Rik	14	14	6	11	14	0	0	0	0	1	10	6	1	2
5031410I06Rik	323.093	348.321	300.155	317.057	21.4334	114.468	68.7162	139.067	2592.52	2387.23	75.7794	135.478	161.91	264.162
5031425E22Rik	89	64	72	79	153	127	95	39	68	72	942	931	54	71
5031425F14Rik	3	3	3	11	15	0	13	0	1	0	3	5	3	2
5031426D15Rik	405.485	442.683	459.888	455.263	650.793	578.956	707.424	411.965	284.532	216.635	92.1058	138.472	47.4878	47.2849
5031434C07Rik	31	17	26	25	64	43	45	41	13	5	14	9	4	10
5031434O11Rik	66	99	91	73	47	71	38	36	8	0	23	13	4	5
5031439G07Rik	468	457	568	595	321	417	471	321	550	311	4779	4793	146	252
5033403F01Rik	71	53	70	59	52	46	46	56	11	11	131	92	5	10
5033403H07Rik	0	0	0	0	2	0	0	0	1	0	0	0	0	0
5033404E19Rik	0	0	1	0	0	2	0	0	0	0	0	1	0	0
5033406O09Rik	21.0757	39.0421	18.0214	21.2894	28.2976	10.0776	42.0782	43.1812	63.1684	44	32.0533	71.4001	6.02708	5.03258
5033417F24Rik	0	0	0	1	1	0	0	0	8	9	33	40	0	0
5033428I22Rik	0	1	0	1	0	0	0	0	0	0	0	0	0	0
5330411J11Rik	0	0	1	2	3	0	0	0	0	0	5	2	0	0
5330413P13Rik	0	2	2	7	2	3.085	13.0155	7	1	0	0	7	1	0
5330416C01Rik	0	0	0	1	0	0	0	0	0	0	3	4	2	1
5330417C22Rik	147	215	191	182	144	101	141	77	61	21	481	480	31	44
5330434G04Rik	16	19	11	28	71	40	34	12	0	2	3	8	0	2
5330439B14Rik	0	0	0	0	1	0	0	0	5	3	0	0	0	0
5430401F13Rik	0	0	0	0	0	0	0	0	0	0	0	0	0	0
5430402E10Rik	0	1	0	0	0	0	0	0	0	0	2	0	0	0
5430402O13Rik	17	40	19	27	39	11	28	26	14	2	117	116	8	20
5430403N17Rik	0	0	10	1	0	0	0	0	2	0	0	0	0	0
5430405H02Rik	227.194	209.875	219.896	290.242	206.084	300.95	286.474	246.125	174.554	98.683	686.39	593.611	59.3533	70.8567
5430416N02Rik	147	164	117	152	76	168	178	73	29	28	368	300	31	51
5430419D17Rik	0	0	4	0	0	0	0	0	0	0	1	4	0	0
5430421F17Rik	35.4935	30.9357	60.1313	43.1285	99.7033	36.6238	56.2155	56.6791	31.5071	20.2637	140.924	45.9818	14.3971	22.4416
5430425K12Rik	0	0	0	1	0	0	0	0	0	0	0	0	0	0
5430427M07Rik	13	7	3	7	15	13	20	15	5	7	5.47215	2	4	3
5430427O19Rik	36	51	56	48	101	50	71	97	27	9	7	64	8	4
5430428K19Rik	26	8	17	32	29	24	26	47	1	9	3	35	4	3
5430431A17Rik	11	3	10	3	5	0	1	0	5	0	15	19	1	1
5430434I15Rik	0	0	0	0	0	0	0	0	0	0	0	0	0	0
5430437J10Rik	51.8203	100.336	116.289	103.645	190.573	110.358	134.087	161.216	13.5287	4.07482	23.8242	79.7477	5.5364	13.6598
5430440P10Rik	3.62384	17.3851	6.55765	12.5742	56.3107	10.6944	11.2277	12.3742	7.58112	1.52129	17.19	13.1404	0	2.69245
5530400C23Rik	0	0	0	0	0	0	0	0	0	0	0	0	0	0
5530401A14Rik	0	0	0	0	0	0	2	0	0	0	0	0	0	1
5530601H04Rik	823.451	928.744	864.749	886.094	1496.23	1282.9	1147.92	980.244	219.248	145.768	807.533	1006.43	59.9293	122.842
5730403I07Rik	168.97	193.054	175	220.482	373.477	259.656	293.742	229.508	157.167	152.697	76.6179	92.0851	10.3335	15.8383
5730405O15Rik	5	4	14	6	9	6	0	2	2	0	11	15	1	3
5730408K05Rik	5	10	7	2	2	7	18	1	1	2	42	17	3	2
5730409E04Rik	66.3675	113.801	82.662	74.8556	72.279	70.0158	105.516	64.8096	230.365	232.138	397.939	601.199	32.0511	68.2671
5730412P04Rik	0	1	0	0	0	0	0	0	0	0	1	0	1	0
5730416F02Rik	0	1	4	0	1	0	1	0	0	2	0	1	0	0
5730420D15Rik	3	8	1	0	6	0	0	0	0	0	4	13	0	0
5730422E09Rik	14	16	29	32	46	38	47	29	3	7	23	62	7	11
5730435O14Rik	1	5	1	2	51	0	0	17	4	4	1	1	0	0
5730455P16Rik	277.078	352.954	358.491	373.449	371.62	446.424	429.947	293.187	603.889	305.059	2253.69	2115.17	98.976	119.697
5730460C07Rik	31.4564	17.4964	17.4599	18.2808	20.8039	16.1043	15.294	10.271	13.2016	4	10.4703	18.4061	2	3.10504
5730480H06Rik	29	33	37	36	71	22	77	60	9	19	105.84	137	14.3625	13
5730488B01Rik	0	0	0	0	0	0	1	0	0	0	0	2	0	0
5730507C01Rik	679.659	742.569	774.209	729.436	1291.77	1424.89	1113.7	1116.2	631.337	322.954	5236.25	6510.93	188.464	310.745
5730522E02Rik	0	7	2	1	5	54	1	10	5	0	14	8	1	0
5830408C22Rik	0	0	0	0	0	0	0	0	0	0	0	1	0	0
5830411N06Rik	0	0	0	0	0	0	0	0	0	0	1	2	0	0
5830416I19Rik	221.853	160.832	214.54	276.678	319.449	321.838	400.375	186.263	27.9317	16.2166	11.5587	44.6886	34.2904	70.8627
5830417I10Rik	3079.3	3155.61	3280.64	3938.48	4412.77	4012.8	5177.69	3855.5	2580.42	1663.7	11808.8	14505.3	681.623	1021.57
5830418P13Rik	5	6	12	6	7	6	0	7	2	1	4	6	0	0
5830428M24Rik	1	0	0	0	0	0	0	16	0	0	1	1	0	1
5830432E09Rik	0	0	0	6	0	0	0	0	0	3	0	8	0	0
5830444B04Rik	82.0473	77.8411	49.3194	105.87	106.149	12.0912	61.7236	51.882	55.4565	36.5951	50.5753	48.8365	11.4163	17.8646
5830454E08Rik	4	20	18	5	10	19	40	3	57	30	174	109	4	3
5830473C10Rik	14	8	38	18	11	18	4	0	0	3	2	1	7	4
5930403L14Rik	214.759	207.357	328.585	206.531	305.369	336.174	716.656	177.708	170.508	118.025	430.988	498.734	74.5651	102.844
5930412G12Rik	50	44	57	54	74	134	91	44	20	9	154	179	10	14
5930430L01Rik	610.314	674.929	788.158	746.632	998.347	705.164	678.73	784.037	221.881	186.974	232.436	355.989	97.9937	100.89
5930438M14Rik	1	1	1	1	1	0	0	0	0	0	1	1	0	1
6030407O03Rik	8	1	15	1	50	0	0	5	4	3	2	5	3	0
6030408B16Rik	143.116	114.22	112.211	137.172	246.114	191.154	196.458	198.166	519.231	342.039	125.112	582.038	29.521	29.2518
6030440G07Rik	132.445	190.408	166.046	181.239	260.713	179.441	178.964	255.653	63.7334	42.0393	194.565	103.181	16.0503	37.6034
6030443J06Rik	377.132	282.626	330.861	403.775	640.313	402.004	480.42	483.687	150.007	92.683	193.068	412.01	71.5524	80.0119
6030458C11Rik	877.854	635.749	691.457	777.243	1608.11	1113.7	1724.33	1651.66	532.703	343.569	4709.97	4767.27	292.551	479.537
6030466F02Rik	0	0	0	0	0	0	0	0	0	0	1	5	0	0
6030468B19Rik	4	4.21771	1.02674	9.51553	3	1	9	0	2	2.15975	6	7.24846	1	2
6030469F06Rik	0	0	0	0	0	0	0	0	36	19	0	13	0	0
6030471H07Rik	0	0	0	0	0	0	0	0	9	2	1	0	0	0
6030498E09Rik	0	0	9	0	0	0	0	0	7	1	1	34	0	0
6230400D17Rik	72	70	58	56	54	117	95	30	18	12	130	160	7	20
6330403K07Rik	141	93	111	139	119	22	135	107	88	35	155	226	11	31
6330407A03Rik	17	23	14	15	26	26	23	12	13	4	1	22	2	0
6330409D20Rik	21	16	11	32	33	16	9	8	3	11	45.0635	25.2126	1.06866	5.57208
6330410L21Rik	61.5969	75	101.836	98.7463	195.36	184.821	100.818	144.719	35	27.5258	7.59653	101.41	7	5
6330415B21Rik	29.9031	22.8001	19.5269	12.5796	33.6295	30.147	22.1125	21.1611	50.5771	37.1002	5.20619	45.2031	5.64795	13.4146
6330415G19Rik	28	15.4671	46	33.6482	16.6443	2.02267	20.3636	12	8	16.4163	204.644	192.842	13	26.5132
6330418K02Rik	5.91411	10.6055	11.794	11.7827	13.6133	13	35.8397	5.48982	5.60541	6	100.078	86.0155	2	8
6330549D23Rik	141.119	129.056	171.808	105.401	173.088	193.491	196.463	145.613	105.14	103.247	441.35	307.25	31.5767	48.4427
6430411K18Rik	0	0	0	0	0	0	0	0	0	0	0	4.88691	2.70533	0
6430503K07Rik	0	3	1	6	0	0	0	0	0	0	1	0	0	0
6430531B16Rik	0	3	6	0	0	12	2	9	31	20	2	18	1	2
6430548M08Rik	100	98	82.8182	127	62.2697	66	70	45	155	107	1921	1915	53	66
6430550D23Rik	56.0387	75.0873	71.0455	67	66.0982	168.865	63.8165	47.0906	45.0388	13	189.31	222.406	9.01665	14.0173
6430553K19Rik	52.5918	35.8694	67.6947	50.1708	97.9218	65.0597	114.933	85.713	19.916	6.16251	0	18.0609	6.72966	3.41347
6430562O15Rik	3.04178	0	7.10639	5.08094	9.14734	2.01915	1.00222	9	10.2626	5.14386	51.9132	91.2576	11.0389	7.75328
6430571L13Rik	44.1073	63.7934	42.4276	40.0121	72.5926	37.4244	93.75	53.3314	29.5831	12.1208	225.029	240.863	14.9933	24.5697
6430584L05Rik	0	0	1	0	7	0	0	0	3	0	4	20	0	2
6430628N08Rik	0	0	0	0	0	0	0	0	3	0	10	7	0	0
6430706D22Rik	1095.49	1030.43	1071.29	956.252	1890.3	1628.26	2141.94	1228.07	714.852	608.767	28514.2	21802.8	700.165	1202.62
6430710C18Rik	64	97	103	100	35	80	53	51	4	0	41	19	28	36
6530402F18Rik	4	0	0	9	0	0	1	2	48	33	88.5516	147.76	0	1
6530403H02Rik	928.68	816.054	1006.59	1082.04	2164.81	1563.85	1794.16	1701.61	692.579	479.442	390.223	1260.81	209.659	320.297
6530411M01Rik	0	1	0	0	0	0	9	1	0	0	3	4	0	0
6720468P15Rik	32	67	42	36	47	53	65	18	5	8	32	18	10	22
6720483E21Rik	4	8	7	5	0	14	21	0	2	2	6	7	1	1
6720489N17Rik	193.916	186.666	152.755	193.926	359.765	335.443	310.776	327.879	309.572	142.404	849.306	990.355	24.5536	45.354
6820408C15Rik	21	5	6	7	1	0	16	0	15	4	242	190	3	2
6820426E19Rik	0	0	0	0	0	0	0	0	0	0	0	0	0	0
6820431F20Rik	3078.17	948.825	1016.81	877.817	3798.84	1330.91	1035.84	1167.5	5319.37	3365.35	10275.3	15078.8	411.997	634.592
7420426K07Rik	3	2	0	0	2	0	3	0	0	7	15	12	0	1
7420700N18Rik	19.3383	42	20	63	97.6341	45	45	71.742	10	12	15.2636	24.1637	2.95402	3
7420701I03Rik	0	2	3	3	14	0	3	0	0	0	0	0	0	0
7530416G11Rik	5.0493	5.38918	9.46083	13.1031	24.5368	22.8154	11.611	20.2518	13.0708	8.33536	2.17906	21.4632	6.55164	5.41587
7630403G23Rik	0	0	4	0	3	2	0	0	0	0	1	0	0	0
8030411F24Rik	0	0	0	0	0	0	0	0	11	3	28	340	0	0
8030423F21Rik	145.295	151.118	110.601	167.208	227.488	224.309	239.262	269.651	87.5906	93.1851	159.68	116.601	13.6733	21.8206
8030423J24Rik	0	0	0	0	0	0	0	0	0	0	0	13	0	0
8030442B05Rik	2.10005	7.29025	3.21011	4.29633	6.48501	13.6964	8.39867	6.44507	1.00879	0	0	6.14645	0	0
8030443G20Rik	0	0	0	0	0	0	0	0	0	0	1	0	1	0
8030451O07Rik	0	0	0	0	0	0	0	0	0	0	0	0	0	0
8030455M16Rik	103	53	70	64	117	68	68	80	11	3	44	104	7	13
8030462N17Rik	256	279	340	352	388	414	535	330	588	338	2421	3208	84	160
8030474K03Rik	1540	1325	1405	1575	1490	2397	1538	1493	466	240	11955	9717	394	667
8430422H06Rik	21.1362	8.0788	23	21	33.5255	9.03529	17.0132	13.3021	5.00701	3	4.00022	1	1	3
8430423G03Rik	0	7	0	1	0	0	0	0	0	0	0	0	0	0
8430426J06Rik	0	1	0	4	15	14	1	0	0	0	4	9	0	2
8430429K09Rik	186.551	257.64	226.314	209.921	270.235	551.68	211.515	211.221	287.413	169.291	554.394	488.415	37.8802	51.2619
8430430B14Rik	1	0	1	4	10	0	12	0	0	0	12	2	0	1
8430431K14Rik	5.87058	24.8505	15.4907	32.5161	30.191	24.6853	16.9139	60.2677	29.6108	15.6328	2.46386	5.09638	2.54055	4.07118
8430436N08Rik	0	0	0	0	0	0	1	0	0	0	0	0	0	0
8430437L04Rik	10	13	7	2	0	0	0	0	0	0	3	5	2	2
9030025P20Rik	588.391	740.295	570.049	798.733	847.348	1459.82	887.071	846.277	144.541	152.952	856.769	860.333	71.0324	69.6446
9030204H09Rik	5	1	6	3	4	2	8	1	3	1	3	9	0	1
9030404E10Rik	10.098	5	17	16	12	5	15	23	10	5.04222	5.01083	3	2	2
9030612E09Rik	18.512	12.2878	21.564	17.2148	73.394	22.179	44.3904	40.8834	22.1123	15.0238	84.3816	93.0154	6.55093	11.8461
9030616G12Rik	0	0	0	0	0	0	5	0	0	0	1	0	0	0
9030619P08Rik	0	0	0	0	0	0	0	0	0	0	1	0	0	0
9030624G23Rik	168.021	154.129	204.747	188.602	209.62	168.513	211.038	169.053	303.621	239.948	1016.8	1751.98	83.0271	63.7292
9030625G05Rik	49.0113	88.2721	55.9048	71.6025	100.025	71.5802	67.9204	102.147	17.983	14.0876	61.5888	54.4875	2.53037	2.46133
9130008F23Rik	13	13	21	12	45	15	60	29	8	11	25	40	5	5
9130015A21Rik	8	7	6	5	6	2	2	5	6	0	0	3	0	0
9130015G15Rik	22.6136	10.5392	22.4429	11.8126	36.5036	25.0038	17.4535	56.2852	9.24522	8.38625	9.24754	37.9493	0	4.09134
9130015L21Rik	0	0	0	0	0	0	0	0	0	0	0	0	0	0
9130019O22Rik	90.4883	100.438	38.1205	105.661	26.7994	115.62	75.4643	57.6917	61.7327	32.0618	374.579	535.794	21.8601	28.5956
9130019P16Rik	76.8447	90.2866	69.4622	64	74.3376	130.406	85.7789	129.43	5.1135	14	113.349	280.004	8.47141	18.2481
9130023H24Rik	125.25	100.394	76.6187	118.184	83.9006	24.2265	101.656	24	135.872	82.2058	1130.39	1096.99	25.6442	59.6374
9130024F11Rik	54	13	18	77	47	53	39	33	10	5	38	67	13	26
9130204L05Rik	0	0	0	0	0	0	2	0	2	0	0	0	0	0
9130209A04Rik	13.2009	7.04887	7.0562	13.1051	8.03429	8.05725	8.0569	20.0396	3.02963	4.03763	2.09992	4.03084	3.02468	1.03618
9130221F21Rik	212.962	208.518	201.021	231.807	409.781	302.136	395.415	296.952	233.393	151.169	49.0247	168.481	26.4601	26.522
9130221H12Rik	175.541	131.422	145.167	158.15	68.8433	150.875	74.6595	105.606	144.495	130.746	1071.32	818.433	38.5891	47.4157
9130227L01Rik	69	60	65	55	86	79	66	61	14	17	9	47	2	3
9130230L23Rik	0	0	0	0	0	0	0	0	15	14	0	0	0	0
9130401M01Rik	1362	1601	1511	1430	846	736	1110	757	402	352	6194	4518	360	526
9130409I23Rik	29	22	13	23	42	35	32	36	2	5	4.0144	6	0	0
9230009I02Rik	0	0	0	2	9	2	1	1	0	0	0	0	0	0
9230019H11Rik	34	42	53	49	86	80	70	65	9	9	21.7941	54	6	10
9230020A06Rik	0	0	0	0	2	0	3	0	0	0	0	0	0	0
9230102K24Rik	0	1	0	0	0	5	0	2	0	0	0	0	0	1
9230102O04Rik	0	2	1	0	0	0	0	0	0	0	0	0	0	0
9230104L09Rik	0	0	1	1	0	0	0	0	7	12	0	2	0	0
9230105E05Rik	204.518	221.708	246.539	242.362	411.26	229.886	246.921	288.452	222.895	111.943	46.6657	93.9211	11.8985	13.5148
9230110F15Rik	0	0	0	0	0	0	0	0	0	0	0	3	0	0
9230112D13Rik	0	2	0	5	0	0	2	3	1	1	8	3	0	0
9230112J17Rik	33	45	45	45	40	57	45.8435	80	15	23	35.2587	44	3	11
9230114K14Rik	160.592	128.923	216.045	188.436	210.666	191.886	224.239	191.582	107.479	73.8693	299.222	321.232	25.0949	39.0169
9230116L04Rik	29.9789	38.8485	58.2231	50.0821	75.7075	91.1083	33.5761	67.1982	1.0076	6	67.9111	45.3095	6	8.13754
9230116N13Rik	52	37	30	60	52	39	96	74	13	28	342	251	17	18
9230117E06Rik	6	2	10	2	21	5	20	26	0	0	3	0	1	2
9330020H09Rik	139.823	206.418	162.701	154.943	169.954	230.511	242.061	199.718	104.959	56.6235	432.17	354.139	36.2637	49.5671
9330102E08Rik	373	268	432	350	296	286	283	336	128	59	5201	4243	121	210
9330104G04Rik	120.436	101.572	89.1287	113.61	194.675	149.739	156.412	187.584	83.9078	74.6505	114.211	151.359	22.3774	26.7928
9330111N05Rik	3	0	2	4	0	3	14	4	0	1	4	11	1	0
9330117O12Rik	4	5	6	4	5	3	2	4	0	0	0	3	1	1
9330133O14Rik	108.545	100.116	86.432	139.38	42.1962	33.0796	15.4355	24.1818	161.027	124.582	925.362	630.478	14.2613	25.7694
9330136K24Rik	347.512	321.453	378.222	419.218	675.716	417.887	652.291	554.6	222.57	181.431	374.783	341.789	58.4494	92.3034
9330151L19Rik	154.688	152.995	192.574	151.501	216.714	198.945	147.908	179.061	235	185.25	725.284	754.413	19.9228	30.7037
9330158H04Rik	335.697	280.925	302.239	298.013	505.175	464.769	506.536	491.148	300.757	219.677	268.119	457.348	43.5775	51.8306
9330159F19Rik	114.785	144.803	151.153	202.869	233.467	190.044	221.308	244.598	100.32	97.1239	175.423	215.852	26.6838	35.0239
9330159M07Rik	324.873	276.677	284.116	393.135	566.624	487.173	421.336	425.324	213.36	140.098	815.581	938.57	88.9512	105.674
9330162012Rik	6	0	1	3	35	0	0	0	29	7	24	43	0	0
9330162B11Rik	0	0	0	0	18	0	2	0	1	0	0	0	0	2
9330175E14Rik	29	27	34	33.4545	53	92	33	25.2279	16.3299	19	8.39565	27	0	1
9330175M20Rik	15.3374	10.2935	15.4344	10.442	34.9773	12.3925	19.7415	23.1985	78.8516	43.8748	13.2523	34.7758	15.4408	8.8492
9330178D15Rik	16	30	20	28	49	14	37	34	3	7	13	17	2	3
9330179D12Rik	20	16	39	46.9999	93	93	145	15	9	7	26	20	4	12
9330182L06Rik	149	300	208	288	268	230	251	236	147	73	2233	1822	82	127
9330182O14Rik	4	5	2	0	6.0044	6.01101	9	9	0	0	0	0	0	0
9330188P03Rik	5	0	0	0	0	0	0	0	0	0	0	0	0	0
9330198I05Rik	4	18	23	23	74	9	11	69	5	17	72	52	3	5
9330199G10Rik	2	0	1	0	0	0	0	4	0	0	1	0	1	1
9430007A20Rik	0	0	0	0	0	0	0	0	0	0	0	0	0	0
9430014N10Rik	0	0	0	0	0	0	0	0	0	0	0	4	0	0
9430015G10Rik	529	554	633	622	521	256	547	328	191	105	5386	4451	136	214
9430018G01Rik	171.342	167.037	138.066	162.331	263.758	349.904	238.733	260.588	36.2137	16.406	581.664	333.423	92.0751	104.074
9430019J16Rik	20	20	9	62	57	8	28	12	0	0	1	9	3	3
9430021M05Rik	110	96	133	116	209	214	190	168	13	9	57	67	7	18
9430037G07Rik	207.919	166.33	172.501	220.156	355.41	202.005	293.196	191.028	169.422	127.804	1045.08	1261.05	89.288	142.333
9430038I01Rik	124.667	180.599	178.577	139.772	202.93	167.706	308.223	176.7	144.007	127.68	784.735	653.631	40.7395	51.0653
9430041J12Rik	20	23	19	11	6	18	5	19	6	4	22.0373	131.187	0	5
9430060I03Rik	19.3917	3.31739	9.02428	8.13377	23.9757	2.18866	11.2916	14.3711	2.0843	3	27.2246	15.6363	8.58146	11.0246
9430065F17Rik	50	36	37	11	40	51	85	31	2	1	101	101	10	6
9430069I07Rik	0	1	0	0	0	0	0	0	1	0	0	1	0	0
9430078K24Rik	4.49752	5.02057	4.21061	4.05851	12.0123	0	2.1335	3.07712	12.5001	6.08226	1.02811	10.0001	1.00021	5
9430083A17Rik	49.0566	31.6524	49.1355	91.1733	63.9997	113.795	103.407	124.033	3.13477	10.913	85.118	77.3987	17.4597	17.4687
9430091E24Rik	157.405	124.652	178.823	225.682	237.043	310.173	265.343	254.449	233.053	123.043	842.84	875.583	64.8227	50.2355
9530002B09Rik	0	0	0	0	0	0	0	0	0	0	0	16	0	0
9530003J23Rik	4.10371	11.1193	4.10023	2.01759	6.08513	1.00696	13.5531	5.07592	1.0035	3	7.00629	2.00709	0	0
9530014B07Rik	0	0	0	2	0	0	0	0	0	0	0	0	0	0
9530020I12Rik	51	53	54	68	65	86	70	108	11	9	8	22	16	29
9530026F06Rik	3.35295	2.19471	6.54913	5.51647	1.07617	5.36101	5.41794	2.16497	0	2.32865	2.69715	2.08852	1.35034	0
9530026P05Rik	4	33	18	4	21	4	22	14	4	4	2	7	8	4
9530027J09Rik	41.8082	67.0194	52.919	69.0399	19.7318	68.8037	38.08	80.6423	26.1248	18.5677	96.2602	119.211	13.134	14.2068
9530036O11Rik	32.4776	20.3442	17.1994	35.7658	80.3685	25.9518	38.4493	43.0406	7.80258	13.0089	19.2871	19.1851	2.51365	6.54247
9530051G07Rik	16	11	13	16	44	60	23	18	0	16	31	30	8	5
9530052C20Rik	35	5	9	4	12	9	1	12	3	5	54	56	1	3
9530052E02Rik	33.1336	53.2516	24.8948	47.0154	43.4457	48.3184	45.6235	31.9117	8.59074	7.76666	18.8588	22.5041	5.25764	6.4021
9530053A07Rik	5	1	3	0	1	2	2.43973	0	9	0	30.8669	25.2167	3.51214	2
9530059O14Rik	32	16	17	35	11	27	27	74	2	0	2	7	3	5
9530062K07Rik	3.74822	46.4747	24.3073	5.77395	11.5672	13.4394	8.50818	21.2856	41.5851	3.19064	152.182	74.3384	9.58037	10.5553
9530068E07Rik	1091	1125	1247	1359	781	1077	1365	1111	2600	1883	10732	10461	227	354
9530077C05Rik	657	817	733	719	528	467	404	340	153	155	2646	2155	159	288
9530080O11Rik	41	61	41	56	109.101	91.9999	67	57	11	1	101	120	17	16
9530082P21Rik	181.042	261.09	277.138	282.027	148.786	302.486	235.139	232.359	122.003	82.2709	539.825	436.264	14.9208	30.4032
9530091C08Rik	217.739	139.791	230.825	270.258	676.687	295.816	338.406	477.774	443.974	337.328	142.81	276.563	61.7337	78.0675
9630001P10Rik	18.9085	15.3455	18.9934	11.9643	36.3695	28.4153	22.9662	24.8398	18.6448	26.583	61.427	87.5188	10.4366	5.66199
9630013A20Rik	0	3	0	0	0	0	0	0	4	1	0	0	0	0
9630013K17Rik	1	19	3	4	9	10	1	4	4	5	37.721	73	0	2
9630028B13Rik	157.597	155.528	170.645	159.55	161.299	143.664	194.133	206.141	81.9287	58.5815	89.5181	155.263	19.4542	36.5872
9630028H03Rik	0	1	6	0	0	0	1	0	0	0	1	2	1	1
9630028I04Rik	55.562	60.411	48.5341	63.2365	85.6526	48.2868	52.7188	95.6758	57.6794	39.1662	23.6867	109.433	2	4
9830107B12Rik	45.2229	23.736	26.1539	58.1944	123.535	88.6739	52.1583	53.3123	17.5656	19.6354	26.7826	33.9143	9.25585	13.7738
9830132P13Rik	99.1667	86.7423	112.779	132.401	135.073	105.552	132.778	128.726	59.8388	56.6729	15.5189	50.5974	10.781	21.3905
9830166K06Rik	94	99	85	122	155	120	126	127	32	28	82	70	5	13
9930012K11Rik	9	5	8	9	22	44	30	25	16	19	36	83	3	6
9930014A18Rik	13.3189	23.8294	8.08273	22.0474	37.1385	0	37.0588	41.116	22.3759	21.1227	94.6866	166.368	6.72388	7.76596
9930021J03Rik	5098	5371	5692	5414	7785	9473	5546	6830	3676	2346	12121	12777	526	862
9930104L06Rik	204.501	242.504	249.67	150.247	169.346	109.15	216.794	223.297	56.2496	24.0077	1035.35	894.471	52.0687	103.109
9930111H07Rik	44	52.799	37.5981	51.2693	161.154	66.9303	138.515	95.3126	9.59545	11.7672	26.2922	72.0769	3	4
9930111J21Rik1	342.648	296.852	446.228	466.234	902.274	611.439	464.495	596.183	174.671	156.167	27.5155	110.84	28.0974	19.0809
9930111J21Rik2	9.52836	1.06498	0	4.22161	0	3.10908	1.06044	10.9155	6.77493	2.27733	0	0	0	0
a	0	7	0	1	0	0	0	2	0	0	2	0	0	0
A030001D20Rik	53.1047	55.2987	57.511	54.3372	36.4679	50.6888	43.2965	13.8321	55.2218	17.2156	218.31	290.897	25.6634	36.0207
A130010J15Rik	147.112	148.07	219.298	151.907	284.282	282.9	202.556	167.614	221.957	136.297	1557.01	1229.38	64.8131	97.9474
A130030D18Rik	0	0	0	0	0	0	0	0	0	0	0	0	0	0
A130077B15Rik	3468.29	3135.75	3350.31	3680.83	7036.31	5107.65	5873.57	6163.89	3026.63	2295.72	4988	5301.99	2117.54	2993.08
A1bg	0	0	0	0	0	0	0	0	0	0	0	0	0	0
A1cf	42.6971	45.601	65.5595	53.8463	91.8529	60.6539	68.1934	81.0002	30.8472	31.7492	6.52276	11.1412	9.15954	4.89486
A230001M10Rik	2	0	4	0	0	3	4	2	3	1	0	2	0	0
A230009B12Rik	2	0	10	0	17	0	13	4	4	2	1	3	1	0
A230020J21Rik	7.66342	26.5764	2.30511	11.0936	43.1988	4	13.3118	22.3278	14.494	7.70097	12.8884	8.64314	3.31689	3.27287
A230028O05Rik	1.00051	2.00383	22.0689	1.00711	4.0142	0	4.01727	8.03671	1.0033	7.02137	2.01942	14.1265	5.34816	2.14209
A230050P20Rik	105.759	76.334	99.8406	68.1127	131.298	123.589	125.415	163.263	43.8917	31.9015	276.01	334.123	36.6807	42.7481
A230051N06Rik	34	9	8	3	20	26	18	16	3	0	4	29	1	2
A230056J06Rik	74.6775	79.1586	72.7375	95.8486	118.62	77.6964	102.313	109.413	29.0442	33.2297	63.0198	71.0241	6.02567	4.28204
A230056P14Rik	18.0533	29.6725	20.7481	21.0253	24.2849	51.4641	30.4265	18	17.6474	12.6112	79.2339	192.935	5.95337	22.3568
A230057D06Rik	19	17	23	12	57	30	25	17	14	7	20	61	2	6
A230070E04Rik	19.835	9.31588	21.1524	28.7299	121.828	136.069	30.1206	87.2509	0	0	8.05764	3.22846	6.96954	14.4734
A230072C01Rik	600.352	685.468	704.851	825.141	1224.71	1070.23	1061.11	1015.73	439.535	390.943	406.36	713.312	29.853	59.3915
A230072E10Rik	215.466	188.536	216.848	216.959	309.202	216.506	322.204	231.884	111.488	63.7616	371.091	126.822	22.5048	39.2281
A230077H06Rik	122.92	116.475	112.368	163.205	259.758	203.222	150.907	217.351	56.9858	43.5043	99.5591	126.65	26.4249	35.233
A230083G16Rik	12	2	7	10	7	4	8	0	6	13	25	53	1	3
A230103J11Rik	27.041	8.01674	29.3555	62.8791	10	12.1785	13.051	7.0128	13.5648	4.1152	385.378	471.704	22.8291	42.1024
A230107N01Rik	8	1	8	7	14	11	13	13	4	1	76	64	2	6
A230108P19Rik	23	17	26	35	41	21	22	13	2	6	40	59	3	5
A2m	3	27	8	25	0	0	3	35	16	3	107.955	162.867	16	20
A2ml1	148.049	91.8804	182.455	197.288	435.167	451.481	263.917	535.086	26.7497	9.02667	137.643	118.829	31.682	50.3461
A330008L17Rik	0	0	2	0	0	0	0	2	2	0	0	1	2	0
A330009N23Rik	18	15.1783	5	17	62	75	39.0001	28	18	15	33.5062	53.3611	2.54824	3
A330015K06Rik	0	0	0	0	0	0	0	0	3	0	0	0	0	2
A330023F24Rik	35	24	11	32	45	17	13	17	35	13	28	39	22	13
A330032B11Rik	420.354	395.173	379.369	401.011	670.206	444.594	596.96	627.448	278.913	259.667	1566.88	364.626	93.5188	120.139
A330033J07Rik	14.0348	1	3	3	1	10	17	6	0	2	6.10288	5.00708	7.04954	11.1131
A330035P11Rik	128.505	162.642	95.753	106.147	123.621	68.7238	126.171	85.6197	78.191	111.104	128.014	178.028	11.8277	33.8965
A330040F15Rik	6	11	0	8	3	0	0	7	0	2	4	11	0	0
A330041J22Rik	34	17	14	10	52	11	23	40	13	12	129	80	3	7
A330048O09Rik	0	0	0	0	2.02409	0	14.8638	0	0	1.12688	0	0	0	0
A330049N07Rik	155.134	135.107	119.08	150.157	307.947	102.092	189.563	237.813	29.038	30	390.946	396.033	19.2399	40.5461
A330069E16Rik	179.566	216.045	215.336	206.446	190.551	292.173	222.39	235.151	172.325	159.724	1890.04	275.926	175.398	215.389
A330070K13Rik	0	0	0	0	0	0	0	0	0	1	0	0	0	0
A330074K22Rik	16	1	13	13	49	0	5	23	61	22	28	19	3	2
A330076C08Rik	8	30	15	4	6	3	11	1	2	3	19	12	4	4
A330076H08Rik	6	4	6	13	27	6	3	35	12	10	10	37	4	7
A330093E20Rik	0	2.12833	9.27971	1.04327	11.3895	11.7255	3.11945	6	3.28796	0	16.8147	17.7494	0	0
A330094K24Rik	4	4.02213	13.0005	4.07812	9.37417	5	7.00021	20	6	3	29.1181	68.2227	3	4
A330102I10Rik	9.01078	5	16	15.027	6	4	17	1	2	7.023	35.0116	23	4	8
A3galt2	6	4	0	0	2	0	0	2	15	37	21	29	0	1
A430005L14Rik	139	126	164	152	119	182	304	108	69	44	1932	1691	87	126
A430033K04Rik	278.586	210.017	205.257	282.557	402.871	238.817	359.178	427.027	376.343	389.308	379.27	819.717	49.0812	60.4838
A430035B10Rik	27	7	38	15	54	55	46	16	29	19	86	50	4	16
A430046D13Rik	280.002	206.388	366.51	292.434	422.711	263.052	305.652	342.855	201.828	130.43	298.31	391.262	36.8941	54.3908
A430057M04Rik	79.9809	71.9549	88.9022	112.219	83.2193	88.0429	85.7611	84.7645	107.5	72.4937	34.647	65.7234	7.1107	5.59237
A430078G23Rik	115.895	69.2992	89.7745	104.779	151.883	54.359	115.112	141.432	55.0733	69.954	85.3708	299.679	9.72821	23.9902
A430078I02Rik	57.9363	61.0195	78.2344	94.8981	87.9564	56.7101	57.6458	33.4727	28.118	19.0979	51.4212	147.366	9.16167	31.3563
A430085M09Rik	390	358	349	390	626	461	552	743	91	61	35	153	21	23
A430088P11Rik	33.5983	46.8511	52.5832	45.3197	62.2238	31.8675	47.761	35.2107	42.9079	37.4688	55.4632	99.6727	6.22793	14.2389
A430089I19Rik	0	0	1	0	0	0	0	0	0	0	0	0	0	0
A430090L17Rik	30.0996	11.0521	23.1617	35.2458	53.362	70.6247	18.2528	39.1434	36.4693	14.336	12.007	30.0403	6	15.0428
A430093F15Rik	3	0	6	8	14	0	0	2	0	0	8	1	0	0
A4galt	34.8757	21.7966	25.1431	45.1938	42.9473	4.406	30.3327	37.9292	63.6763	66.8574	61.2532	148.635	15.2932	10.2613
A4gnt	0	6	0	0	0	0	0	17	0	0	2	0	0	0
A530006G24Rik	0	0	0	0	0	0	0	0	0	0	0	0	0	0
A530010L16Rik	0	0	0	0	0	0	0	0	0	0	0	0	0	0
A530013C23Rik	1.03092	0	0	1.02898	1.02967	0	0	3.02235	3.00509	10.0069	1.01477	0	0	0
A530016L24Rik	0	0	0	0	0	11	0	0	6	2	1	1	2	5
A530021J07Rik	0	0	0	0	0	0	0	0	0	2	0	7	0	1
A530032D15Rik	0	1.04069	0	4.40682	5.02409	0	0	1.18198	0	0	5.35759	1.22812	1	3.63693
A530046M15Rik	0	0	0	0	0	0	0	0	0	2	0	0	0	0
A530050N04Rik	79.5645	70.6464	115.593	118.316	177.752	95.3366	151.523	111.036	53.107	29.969	28.8508	55.8375	7.70441	10.5432
A530053G22Rik	0	0	0	0	0	0	0	0	0	0	0	0	0	0
A530058N18Rik	0	0	0	0	0	3	0	11	0	0	2	1	0	0
A530064D06Rik	62.8801	52.3818	77.0246	71.1483	172.399	56.5659	84.4391	103.11	27.6916	10.6271	93.6885	168.097	17.5657	26.9901
A530065N20Rik	52.7004	49.3946	48.5293	51.5985	61.4723	56.5097	72.5853	92.5835	29.9059	26.6567	8.04042	65.5284	5.98478	11.8313
A530072M11Rik	181	78	93	135	181	120	68	92	9	9	73	85	12	13
A530088E08Rik	43.508	14	18.7821	26	42.2942	120.468	63.3225	53	2	2	33.5105	27.2105	1.21343	2.57233
A630001G21Rik	17	8	15	7	51	27	42	8	10	3	17	10	1	2
A630001O12Rik	0	0	0	1	0	0	0	0	0	0	0	0	0	1
A630010A05Rik	19	36	25	20	42	10	24	31	8	3	0	7	0	1
A630012P03Rik	0	0	0	2	1	0	0	6	0	0	2	0	1	3
A630019I02Rik	65.2337	9.44003	29.4643	65.2706	76.083	41.1863	32.9864	91.9985	4.77363	0	1.38338	6.2361	0	2.99283
A630023A22Rik	14	11	8	16	5	19	29	14	0	0	56.7584	58.8116	1.36103	8.80348
A630023P12Rik	0	0	0	0	0	0	0	0	0	0	2	3	0	0
A630066F11Rik	12	10	22	22	17	45	21	17	12	15	161	161	5	10
A630072M18Rik	516.986	423.591	496.172	457.741	772.759	534.895	733.401	674.372	207.59	190.675	1413.98	1195.13	89.7913	166.628
A630073D07Rik	0	0	0	0	0	0	0	0	0	0	0	0	0	0
A630075F10Rik	417.776	350.785	416.604	531.461	836.251	524.572	551.742	739.083	247.138	183.319	49.1636	240.305	53.9178	64.7233
A630076J17Rik	0	0	0	0	0	0	0	0	0	0	0	0	0	0
A630077J23Rik	0	1	0	0	4	0	0	2	0	0	0	15	0	1
A630089N07Rik	6769.29	5967.3	7261.21	7028.89	14284.8	11615	10887.9	12658.3	3157.7	2390.27	2338.96	5274.23	523.405	689.404
A630095E13Rik	0	0	0	0	0	0	0	0	0	0	0	0	0	0
A630095N17Rik	0	0	0	1	0	0	1	0	0	1	5	11	0	1
A730004F24Rik	1	0	0	0	0	0	0	0	0	0	0	0	0	0
A730006G06Rik	6.32739	15.3654	9.24343	11.0648	8.2286	7.05498	8.03396	10.3428	6.38389	4.10479	1.01027	4.31393	0	2.22244
A730008H23Rik	166.752	192.11	251.734	227.522	180.872	184.785	210.478	190.263	214.613	104.845	2223.16	3253.19	121.414	229.98
A730013G03Rik	0	13	0	2	0	0	2	0	8	2	213	203	4	3
A730017C20Rik	38	54	41	52	101	10	61	24	14	6	181	220	11	22
A730017L22Rik	1167.13	1121.25	1178.18	1360.47	2426.49	1905.7	2220.93	1986.22	969.095	747.841	1034.34	2030.53	313.156	446.872
A730018C14Rik	9	1	2	7	3	2	2	4	0	0	0	0	0	1
A730020E08Rik	130.59	95.1538	99.04	127.589	193.127	121.177	192.891	151.294	28.733	36.5439	95.1095	86.747	19.0616	20.1814
A730020M07Rik	3	2	1	13	9	0	0	0	0	2	19	15	0	1
A730035I17Rik	0	0	0	0	0	0	14.3949	0.583669	0	0	0	3.13518	0	0
A730036I17Rik	13.4031	15	17.1639	12.2537	45.6399	34.179	19.1817	20.2813	30	7.47419	8.55478	38.5903	1	1
A730043L09Rik	25.8592	26.0344	30.701	30.7691	37.0325	34.5397	48.122	63.2016	8.45158	10	1.00219	26.4996	0	0
A730046J19Rik	9	11	2	19	21.2159	82.2395	18	38.0643	10.0112	6	6	30.0067	1	0
A730056A06Rik	0	0	0	3	0	0	0	0	7.12059	7	12	37	0	2
A730063M14Rik	1	0	1	0	8	9	1	3	0	1	2	4	0	1
A730081D07Rik	293.818	307.99	301.221	378.153	542.301	311.952	337.768	439.032	62.4902	72.6691	53.3758	208.742	14.1694	33.4875
A730082K24Rik	88.1478	68	88.1457	116.154	121.134	135.332	107	151.184	58	32	16.1087	85	9	11
A730085K08Rik	0	0	2	0	1	0	0	0	1	4	3	5	1	1
A730090N16Rik	0	4	0	3	0	0	1	0	0	7	16	13	3	1
A730098A19Rik	8	6	5	18	24.0309	20	4	16.7457	0	0	3	3	3	0
A830009L08Rik	1	8	0	0	0	2	4	0	1	1	0	1	2	0
A830010M20Rik	332	411	452	404	507	553	341	463	191	106	1214	1228	91	124
A830011K09Rik	10.0303	5.34726	11.1188	14.9898	18.4295	18.7533	16.292	15.8148	42.1145	20.2943	6.51756	46.668	13.5101	14.779
A830018L16Rik	107.73	113.982	140.658	134.833	152.504	126.037	181.499	146.125	57.894	34.2903	162.122	176.336	31.5296	29.9719
A830019L24Rik	0	0	0	0	3	2	0	1	0	0	0	0	0	0
A830019P07Rik	0	0	0	0	14	3	2	0	0	0	8	0	0	1
A830029E22Rik	0	0	0	0	0	0	0	0	0	0	0	0	0	0
A830035O19Rik	36.0805	44.8938	49.5276	40.5947	23.7292	29.3304	70.8432	46.7105	36.4221	52.9683	106.867	299.825	15.8378	38.0344
A830036E02Rik	31.0216	24.5048	34.871	52.5169	30.6489	27	33.038	50	2.32061	1	24.9509	54.5714	6.30255	8.02506
A830052D11Rik	96.3332	112.953	143.69	139.432	154.024	195.742	107.589	122.974	66.0702	60.2248	35.185	66.9568	4.46411	15.0563
A830082K12Rik	283.244	232.349	280.111	320.023	438.542	336.586	428.634	400.677	130.042	109.583	46.0032	169.801	8.1477	14.0709
A830082N09Rik	267.009	302.065	327.892	329.433	407.275	303.153	447.472	485.652	167.209	160.902	584.437	370.063	46.3563	68.6135
A930001A20Rik	3	0	0	1	0	0	0	3	10	2	0	3	0	0
A930001C03Rik	0	6.96037	1.45445	0	1	0	0	9.00455	0	0	1.71501	12.963	0	0
A930002C04Rik	1	5	4	23	10	0	3	5	0	6	2	2	1	4
A930003A15Rik	0	0	0	0	0	0	0	0	0	0	0	0	0	0
A930003O13Rik	22.1336	19.1156	24.0411	35.053	57.4038	43.2564	31.1626	57.467	5.04078	11.1225	4.61494	14.2977	3.36091	1.83027
A930004D18Rik	23.9319	25.3157	7.66537	30.4667	37.6249	76.9098	44.4227	25.8337	12.7177	49.6961	44.0581	64.4183	1.25348	6.58024
A930005H10Rik	70	82	58	90	95	68	54	77.9999	61	60.9999	151	93.0001	2	8
A930006I01Rik	0	0	0	0	0	0	0	0	0	0	0	0	0	0
A930006K02Rik	34	40	55	79	52	48	84	67	11	9	43	31	9	10
A930007A09Rik	78	74	96	95	86	71	73	125	34	32	271	230	17	24
A930007I19Rik	53.6597	46	64	86	73	59	89	69	24.4046	19	24	104	4	9
A930009A15Rik	0	0	4	0	0	0	1	0	0	0	0	1	0	0
A930011G23Rik	102.506	54.0874	49.09	41.2082	33.2211	64	54.2008	92.2919	34.6294	26.1963	4.00452	13.1254	18.7759	35.1881
A930012L18Rik	30.9061	22.2038	28.8974	32.5756	54.9814	37.7214	42.5725	73.7805	19.9246	20.1792	16.805	67.2618	10.0344	7.19723
A930013F10Rik	119	121	152	115	206	171	208	130	71	32	558	553	30	46
A930015D03Rik	5.11442	9.46108	15.3828	5.14668	0	15.5427	6.96565	51.8691	0.166985	10.7487	0	0	0	0
A930016O22Rik	99.5982	71.671	92.9566	53.1976	71.3112	76.1688	121.484	65.8935	40.2185	31.3811	101.681	157.413	24.9107	43.0802
A930017K11Rik	30	39	19	19	50.4938	52	74	19	38.7955	33	214.533	180	7	12
A930017M01Rik	5	0	2	0	0	0	4	4	0	0	15	3	0	0
A930018P22Rik	18	32	9	14	11	1	9	5	3	4	41	31	1	1
A930019D19Rik	4	0	10	1	4	8	0	2	0	0	3	3	1	4
A930024E05Rik	56	47	40	20	62	34	87	24	3	2	27	71	10	13
A930031H19Rik	0	0	0	0	0	3	6	0	0	0	0	0	1	0
A930033H14Rik	6	7.52335	19	22.7352	7	14.0271	4	12.0681	514	376	9	107	2	2
A930037H05Rik	146.479	185.477	224.763	199.274	356.456	293.406	225.152	169.159	144.322	105.695	918.184	775.468	59.2278	81.9418
A930041C12Rik	20	9	21	21	44	62	23	44	3	4	17	27	9	13
AA387883	0	1	1	0	6	0	9	0	1	0	2	0	0	0
AA388235	58.3531	47.3995	32.5432	62.5062	61.4955	49.7093	73.0486	73.0901	34.3838	45.3416	25.9281	113.458	7.54138	11.3946
AA413626	3	2	6	3	0	0	2	0	16	6	2	4	0	0
AA414768	12.2347	4.80646	15.2359	8.18087	13.455	50.3449	20.0784	5.15315	71.9489	39.1005	64.9976	500.166	17.0748	13.288
AA465934	63.3579	49.7419	40.786	63.0966	42.5227	26.6421	84.7708	14.5336	3.44842	0	134.572	79	1	1.54822
AA467197	16	19	19	9	15	1	9	0	6	2	74	182	8	6
AA536875	15.3699	22.2579	17.852	22.5781	19.8361	25.7497	20.6894	28.5132	14.4989	14.6876	4.21745	7.4786	6.61461	6.26466
AA543186	52.3585	19.8485	37.6867	32.5269	19.8772	15.5925	32.1731	24.2475	14.8977	6.47365	141.078	124.508	1.12464	13.8227
AA543401	11	16	7	1	8	11	41	2	2	2	7	0	0	3.93988
AA545190	0	0	0	0	0	0	0	0	0	0	0	0	0	0
AA619741	0	0	0	0	0	0	2	0	0	0	0	0	0	0
AA792892	0	0	0.55363	0	0	2.06839	0	0	2.23664	0	5.49438	6.00813	3.31835	6.27317
AA986860	4	21	29	27	5	32	13	2	57	23	63	112	2	5
Aaas	1595	1596	1761	1420	1258	1374	1201	896	668	358	6792	5195	319	528
Aacs	169	184	179	231	160	135	284	193	154	113	3197	3250	179	224
Aadac	0	0	0	0	0	0	0	0	6	0	0	5	0	0
Aadacl2	0	0	0	0	0	0	0	0	0	0	0	0	0	0
Aadacl3	0	3	0	0	0	0	0	0	0	0	0	0	0	1
Aadacl4	0	0	0	0	0	0	0	0	0	0	0	0	0	0
Aadat	3	5	0	4	0	0	0	0	3	0	3	3	1	0
Aaed1	626	603	552	629	793	752	689	598	232	169	1464	1307	135	179
Aagab	628	796	821	794	511	500	674.001	462.001	333	219	5624	5075.01	269	396
Aak1	1877.06	2027.36	1835.44	2195.99	2831.23	1995.84	2385.97	2218.54	2638.87	1878.19	8262.7	9809.14	364.103	563.284
Aamdc	114	136	156	153	95.9999	57	115	60.9999	125	56	778	755	41	58
Aamp	1437	1556	1394	1265	1071	1126	1737	1093	236	202	12129	10605	757	1258
Aanat	9	10	10	23	2	1	11	2	8	4	47	60	0	2
Aar2	570	602	625	588	429	591	625	417	439	282	5168	4707	167	290
Aard	12	15	1	12	0	0	7	12	980	643	1501	19399	42	63
Aars	1417	1506	1555	1633	1080	1674	2041	1313	1350	1187	15667	13990	564	969
Aars2	55	45	97	23	76	31	91	40	59	52	1060	1611	40	72
Aarsd1	228	178	229	255	141	228	204	189	238	180	2730	2405	58	115
Aasdh	181	301	258	260	208	355	294	323	140	68	1957	2133	112	177.933
Aasdhppt	557.779	655.719	563.459	576.961	546.379	613.888	707.576	560.933	320.919	212.438	3902.61	3233.33	222.038	311.664
Aass	17.0958	4.52302	12.2659	7.81275	38.0429	2.34305	7.30716	28.1971	18.8947	6.31792	48.5395	665.816	3	0
Aatf	1259	1751	1812	1655	1058	932	1136	850	585	387	5682	4247	391	600
Aatk	0	0	11	1	2	0	2	0	2	7	145	113	0	4
AB124611	27	47	62	85	50	38	66	85	14	16	20	36	9	6
Abat	110	125	106	145	214	82	116	112	1314	964	496	4070	33	48
Abca1	5554	6261	6964	6002	11628	9041	11391	9584	18360	17472	14314	20165	1796	2462
Abca12	37	28	25	22	14	28	20	11	4	5	35	116	6	6
Abca13	264	296	263	208	206	145	179	84	4	8	65	72	121	180
Abca14	8	8	6	0	8	0	18	0	0	0	7	5	0	0
Abca15	8.24824	10	11.0008	10.2018	17.4925	9.68783	23	23.399	4	0	12	18	4	4
Abca16	294	209	217	314	531	358	320	410	87	18	575	475	56	69
Abca17	101.143	33	155.582	28.3195	193.55	8.01918	79.2557	26	26.5268	8	1113.36	739.127	75.9718	116.383
Abca2	1502	1296	1560	1458	2371	1719	2021	1675	1429	784	20344	22696	588	992
Abca3	745.557	500.911	796.034	618.548	1069.98	501.068	1046.15	696.341	397.261	227.976	8117.35	9454.95	281.17	430.702
Abca4	26	40	17	42	4	1	13	8	2	11	114	97	8	8
Abca5	498	476	482	525	970	1120	955	724	339	166	2196	2691	152	197
Abca6	12.8943	15.3504	14.4404	8.31014	25.3404	5.13216	8.9162	24.8309	68.4947	44.953	30.6171	392.523	6.10304	8.00335
Abca7	205	236	279	212	585	515	558	153	141	84	2193	2414	155	256
Abca8a	11	12	22	23.1162	0	57	39.2386	9	18	9	117.313	184.595	7.2362	6
Abca8b	195.532	154.923	184.9	235.448	276.117	195.964	166.344	223.287	138.485	68.2282	79.3547	574.038	30.774	43.9697
Abca9	12	2	5	11	0	1	11	5	157	157	8	127	3	1
Abcb10	258	177	238	264	437	352	585	367	234	192	2817	4276	84	114
Abcb11	17	0	3	3	0	0	27	1	0	0	3	7	6	4
Abcb1a	1.06718	32.9202	63.3529	97.2355	1.07697	0	0	1	29.187	37.8821	19.6969	138.592	2.47618	4.08776
Abcb1b	91.9328	123.08	165.647	115.659	68.923	37.256	117	118	26.813	17.817	486.011	474.313	49.5238	85.4312
Abcb4	20	48	59	38	122	100.744	69	73	17	12.3009	69.9073	66	1	9.48105
Abcb5	3	0	0	0	0	0	0	0	45	23	17	189	0	1
Abcb6	440	590	702	555	646	308	479	417	246	157	8916	7525	445	796
Abcb7	767.532	859.509	801.806	861.862	1286.52	1020.34	1097.73	960	822.73	475.13	6835.07	5257.35	198.377	321.343
Abcb8	346	357	458	414	560	707	554	353	665	397	3997	4230	140	204
Abcb9	21	18	13	17	21	17	23	10	15	6	399	448	14	17
Abcc1	1675	1649	1925	2212	2009	1775	2261	1876	1136	642	13129	15325	579	765
Abcc10	216.827	182.699	230.896	211.054	211.782	128.016	198.295	148.145	107.735	99.5355	1752.06	1928.36	58.1183	86.158
Abcc12	3	12	12	25	0	43	6	3	5	0	11	4	2	1
Abcc2	2	2	11	2	3	0	3	21	24	21	8	9	1	0
Abcc3	21	62	21	43	36	70	113	31	99	150	212	227	20	19
Abcc4	901.075	1272.13	1505.1	1513.08	780.823	441.847	678.022	960.326	999.418	488.162	9565.91	8598.55	369.348	590.721
Abcc5	658	686	780	688	790	626	862	494	401	250	10576	10407	286	472
Abcc6	9	2	17	14	2	0	17	4	8	0	36	37	2	6
Abcc8	422	455	594	451	209	314	353	153	167	121	6440	3983	176	269
Abcc9	20.1797	34.7881	39.8444	53.9856	60.4309	56.6093	50.0288	44.2694	297.822	215.304	77.21	320.235	10.9041	19.6606
Abcd1	141.425	99	113.127	115	174	36	123	111	316.015	187	597.433	860.876	24.0579	31.1038
Abcd2	345.861	547.178	421.125	422.825	134.832	116.591	170.634	177.452	103.78	79.8566	320.838	473.384	124.563	189.279
Abcd3	358	445	486	463	805	626	711	430	1036	578	3060	6197	136	209
Abcd4	64.7999	72.9256	129.214	85.4047	107.125	83.1342	137.521	72.2138	34.068	55.9582	498.332	492.166	30.893	41.5364
Abce1	1191	1811	1685	1579	1791	2069	1909	1835	2056	1326	19719	20411	528	913
Abcf1	2390	2477	2439	2484	1353	1569	1827	1210	1563	1297	15960	14265	704.908	1136.92
Abcf2	3238.99	3547	3251	3741	2812	4609	4142.99	2564	1497	1078	26200	22941	1079.94	1665
Abcf3	932	1117	868	1096	821	995	973	733	597	404	7219	6837	323	535
Abcg1	841.455	816.554	1042	881.575	598	672.356	1019.78	461.383	191.863	126.211	3517.51	3495.03	209.655	271.012
Abcg2	358	471	378	445	490	379	473	381	333	223	2534	2438	153	181
Abcg3	4	13	5	8	20	5	16	2	4	5	9	14	5	0
Abcg4	6	9	18	13	22	4	15	17	173	134	199.342	335	3	9
Abcg5	0	0	0	0	0	0	0	0	1	8	1	8	1	0
Abcg8	8	2	12	11	10	0	1	32	8	11	3	10	4	7
Abhd1	15.4909	37.3209	24.181	30.8437	19.3654	5.68349	37.643	13.1376	4.23233	0	109.499	105.516	0	3.78398
Abhd10	248	283	368	485	370	513	733	351	328	197	3700	2883	111	174
Abhd11	482	521	397	368	276	601.999	441	222	182	105	3097	2258	101	189
Abhd11os	4	2	5	7	7	2	0	1	2	0	18	18	1	0
Abhd12	491	387	483	459	478	489	567	356	451	330	3303	3209	151	257
Abhd12b	1	6	9	0	6	28	12	0	2	5	3	2	0	0
Abhd13	498	603.383	479.861	649	699.918	610	765.863	633.299	536.576	397	5900.72	5072	185	299
Abhd14a	236	132	126	172	107	71	143	135	93	68	816.001	729	62	110
Abhd14b	5	5	25	8	28	14	27	11	153	101	19	176	2	2
Abhd15	22	23	23	17	43.0978	39.0221	46.5963	48	22.1402	33	125.852	122.29	4.06993	13.0304
Abhd16a	364	551	488	341	368	230	404	301	334	203	3616	3275	149	230
Abhd16b	0	0	0	2	0	0	0	0	0	0	18	10	0	0
Abhd17a	272	209	257	247	218	186	295	155	204	111	4261	4391	149	239
Abhd17b	175	146	135	161	255	237	270	322	281	147	1996	1981	59	88
Abhd17c	636	629	650	671	699	524	731	614	935	432	7955	6229	117	218
Abhd18	93.5025	93.808	64.9104	86.0083	112.872	178.776	36.2416	140.289	49.3284	42	354.255	431.821	8.6207	24.4048
Abhd2	662	848	947	841	760	1058	1169	775	1639	1987	2832	3922	168	268
Abhd3	147	226	163	220	312	281	212	203	160	127	696	1026	57	91
Abhd4	244	278	317	284	406	523	406	180	2437	1889	1548	7735	127	223
Abhd5	1002	910	811.999	945	676	842	699	749	659	448	3725	3044	138	247
Abhd6	184	214	210	244	204	195	234	190	191	179	984	1371	59	101
Abhd8	28	25	29	12	24	17	48	14	59	63	249	670	15	24
Abi1	1963	2543	2528	2416	1799	2081.83	2188	1677	1473	1275	13537	12041	499	790
Abi2	2226.78	2490.18	2658.26	2635.41	3007.23	2978.11	2977.68	3105.45	1913.37	1369.22	6266.86	6497.44	463.116	712.224
Abi3	112.062	133.315	132.064	131.944	175.706	50	133.928	106	94.779	115.61	538.302	626.859	14.7514	27.46
Abi3bp	198	274	254	224	166	279	69	180	1170	745	70	616	18	23
Abl1	1716.86	1604.02	1631.59	1679.41	2138.36	1583.52	2251.97	1844.71	1593.35	1037.3	11783	14896.1	610.103	946.47
Abl2	3224.79	3589.34	3359.8	3216.93	4538.04	4978.93	4831.8	3535.69	1321.74	928.002	18219.5	20053	1063.87	1754.45
Ablim1	219	311	244	244	318	210	182	158	510	239	302	1024	61	101
Ablim2	12	25	16	37	95	37	22	20	102	71	336	314	9	3
Ablim3	134	61	87	77	120	139	100	24	26	8	332	326	40	40
Abo	1	4	1	13	7	0	10	29	1	0	90	47	2	2
Abr	3694.99	2098	3315.01	3941.01	8468.01	6969	9334.99	7432	1109	1082	5594.31	6767	505	740.999
Abra	0	0	0	1	4	0	0	0	3	0	2	1	1	5
Abracl	9	9	6	39	5	13	55	3	38	46	540	696	6	7
Abraxas1	571.078	566.567	514.37	534.011	732.114	638.245	793.878	655.61	167.64	106.645	2158.59	1619.36	177.037	273.149
Abraxas2	613	767	613	700	560	568	810	492	461	310	5067	4356	187	303
Abt1	953.508	1025.53	1203.36	1226.29	1734.26	1556.15	1574.84	1342.2	557.777	412.542	3978.32	3835.62	337.429	542.627
Abtb1	458	455	540	525	491	522	642	392	108	31	2896.01	2497	179	282
Abtb2	361	281	251	380	596	510	594	504	215	163	1747	4237	70	106
Acaa1a	108.023	181.935	240.055	129.981	137.209	273.337	144.99	79.6379	302.135	212.692	2562.49	2544.66	91.7823	162.159
Acaa1b	174.977	312.066	301.945	164.019	71.7918	91.6625	34.0097	20.362	50.8648	14.3074	1353.51	1042.33	40.2177	68.8409
Acaa2	349	367	385	345	296	243	335	259	2222	1624	1368	2911	149	240
Acaca	3971	4158	4714	4404	4880	3878	5450	4183	2105	1290	26042	27403	1252.97	1860.13
Acacb	240	134	204	248	610	216	416	362	138	96	1024	1043	88	126
Acad10	182.912	218.918	202.005	182.74	120.141	133.995	156.128	196.169	80.0479	72.9663	1259.45	1115.85	82.0299	111.131
Acad11	320	385	407	321	566	814	535	389	236	183	2318.3	2540.91	176.85	263.898
Acad12	80.0877	59.0818	73.9946	96.2598	56.8588	17.0045	64.8724	25.8306	30.9521	14.0337	1299.55	1282.15	47.9701	100.869
Acad8	158	160	175	273	264	301	276	180	534	414	1333	1764	38	49
Acad9	855.316	849.288	858.703	949.789	1333.67	1066.8	1217.67	960.847	667.831	465.842	6401.29	6815.23	363.413	611.91
Acadl	188	221	200	299	168	238	241	252	1073	787	1833	2719	89	146
Acadm	489	631	798	373	524	603	742	359	997	687	5735	5010	239	400
Acads	92	118	103	113	45	102	64	41	104	115	1482	1847	86	148
Acadsb	242	378	413	372	361	366	418	312	1120	798	2025	2919	82	126
Acadvl	552	514	512	583	517	553	546	548	927	675	8315	7900	156	243
Acan	63	61	122	78	86	228	69	205	140	102	2770	3095	63	101
Acap1	6	9	13	15	61	15	33	22	4	1	43	127	2	13
Acap2	757	871	968	827	1632	1780	1831	1188	581	370	3263	4609	245	383
Acap3	750	486	614	520	411	364	490	367	397	198	6404	6058	153	288
Acat1	1455	1915	1776	1539	1302	1392	1396	1105	2527	1849	7069	6761	325	491
Acat2	406.331	677.26	677.139	624.138	424.054	371.118	621.502	619.571	599.4	323.92	8598.82	6578.44	109.201	166.72
Acat3	18.2782	38.7213	25.5557	15.7742	41.6751	47.5184	49.1042	36.56	26.0713	39.3612	206.557	301.834	8.9651	21.5979
Acbd3	1401	1856	1610	1622	1619	2041	1741	1628	1460	944	11212	9926	311	534
Acbd4	14	20	7	36	0	23	39	0	34	37	72	250	3	10
Acbd5	646	969.001	841	875.999	709	913	724.999	709.001	1233	726	3985	4251	133.755	192.847
Acbd6	411	420	379	427.999	263	192	366	340	188	121	5225	4427	136	238
Acbd7	3	3	4	4	7	0	3	6	5	0	93	54	1	3
Accs	67.0333	48.6704	82.9506	97.1879	96.9651	107.729	90.5005	67.1392	153.354	116.469	277.371	557.082	13.0923	16.2752
Accsl	0	0	9	6	1	4	4	10	7	0	15	23	0	0
Acd	369	367	411	320	247	424.999	494.999	270	263	173	3211	2361.01	72	156
Ace	574.921	258	344.986	486.918	1240	1141.97	1161.95	1316.9	412	236.959	2471.65	4539.73	170.9	296
Ace2	21	19	19	10	28	2	15	0	18	18	21	97	4	8
Ace3	1	0	3	0	0	0	13	0	0	0	4	3	0	0
Acer1	100.064	82.6592	132.257	87.4951	189.845	124.676	147.19	132.304	60.8846	29.2666	127.516	77.8725	15.323	19.2667
Acer2	654.332	701.557	690.877	500.171	372.053	412.949	301.706	432.016	137.978	94.277	526.722	588.539	49.04	67.7
Acer3	173.94	218.846	244.954	296.836	403.028	427.814	359.894	408.183	218.194	138.485	2054.48	1701.87	66.6758	109.438
Ache	0	0	5	4	0	0	0	0	27	15	6	16	0	2
Acin1	2614.39	3102.9	3321.65	3167.83	3551.57	3226.35	3237.38	2350.05	2254.67	1642.36	21640.5	23875.3	999.95	1607.74
Ackr1	0	0	4	0	0	21	0	0	2	3	12	40	0	1
Ackr2	1	17	1	7	8	29	14	86	6	3	66	53	2	1
Ackr3	41	54	24.9999	71	35	13	65	29	113	53	284	591	2	5
Ackr4	47.1951	29.085	51.8446	59.2625	66.4591	49.1131	64.1188	104.077	37.1937	21.3453	84.5521	144.194	19.3592	18.6965
Acly	3824	4272	5373	3964.99	3319	3129	5301	3365	5018	3791	46006	47691	1691.99	2658
Acmsd	107.023	95.0493	114.553	137.359	218.897	128.415	225.781	145.236	90.03	85.8672	114.501	118.938	7.37337	12.5344
Acnat1	1583.5	1253.3	1449.86	1716.82	3165.67	2179.9	2098.86	2992.21	444.917	430.567	397.162	911.431	73.553	142.865
Acnat2	0	0	0	0	0	0	0	0	0	0	0	0	1	0
Aco1	593.253	471.7	595.169	479.075	968.093	823.348	1109.21	739.071	815.862	568.266	4675.05	4966.08	207.912	384.785
Aco2	3217	3241	3628	3929	2876	2725	2848	2647	2784	1922	34072	33443	657.607	1051.93
Acod1	0	0	0	0	0	0	0	0	5	3	1	3	0	0
Acot1	34.3378	29.1812	32.7372	29.2696	33.3146	39.4419	80.5235	48.6764	298.83	274.884	714.39	1054.05	12.0149	19.3954
Acot10	1.03072	0	0	4.06126	0	0	0	0	0	0	5.24709	0	0	0
Acot11	137.31	115.391	124.873	158.128	235.014	106.25	223.175	271.797	363.773	272.728	1386.19	1340.57	31.2032	48.2768
Acot12	0	0	0	2	4	0	12	0	3	3	2	8	0	0
Acot13	504	505	425	453	353	300	399	363	149	148	1006	723	153	197
Acot2	87.1382	102.844	84.2385	99.7334	176.769	213.608	157.043	91.1285	1236.1	976.114	390.418	581.093	27.872	52.1768
Acot3	13.3384	1	7	4	19	0	15.3547	25.5747	22.9246	6.01464	195.036	193.736	5	7.37302
Acot4	9	3	3	10	4	14	6.75894	0	11	4	67.5645	66.8321	1	5.34346
Acot5	1	3	0	3	0	0	0	0	1.11764	1.01884	53.0514	48.6067	1	0
Acot6	11	7	3	3	28	2	3.27978	24.8395	31.0762	17.0487	99.1513	102.191	5	7.53677
Acot7	440	435	427.999	411	308	366	504	220	219	173	4530.99	3435	170	291
Acot8	80	88.0001	81	102	123	85	173	81.0001	26.9999	15	473	588	18	33
Acot9	541.969	656	633	602.939	524	426	540	414	305	176	5167.75	4337	388	608
Acox1	433	422	457	613	424	690	522	425	921	679	5602	6243	191	277
Acox2	0	0	0	0	0	0	0	0	2	1	2	1	0	0
Acox3	188.603	178.803	263.55	247.323	213.483	158.734	271.456	223.683	827.987	461.44	610.272	939.733	57.7055	84.6511
Acoxl	0	0	0	1	1	0	14	1	4	2	42	57	1	3
Acp1	861.84	998.841	961.536	757.215	898.714	961.033	1207.95	479.818	1126.96	935.959	4033.85	3651.93	97.5563	130.268
Acp2	471.308	486.658	500.346	463.166	636.014	518.632	762.16	475.018	784.35	532.426	2433.38	2917.56	77.773	127.88
Acp4	10	5	6	17	6	2	10	15	30	16	2	15	0	5
Acp5	50	38	78	48	37	86	103	30	32	23	1806	1048	18	25
Acp6	819	1004	802	691	694	474	546	453	239	217	4545	3740	233	386
Acp7	0	0	1	4	10	0	0	0	3	0	36	356	1	3
Acpp	180	160	206	219	322	207	241	332	39	16	433	358	37	61
Acr	51	26	20	16	53	8	60	30.0001	8	3	5	12	5	2
Acrbp	80	51	39	51	137	238	241	104	34	27	427	375	18	28
Acrv1	4	21	9	1	6	6	128	0	14	12	5	6	0	0
Acsbg1	24	62	36	80	19	27	17	11	8586	6001	776	8093	37	50
Acsbg2	12.2276	14.0332	8.07256	7.12227	20.1577	4.04299	55.7941	8.04777	17.3916	10.1844	9.14786	19.2118	6.73119	7.65417
Acsf2	1038	565	866	705	1462	881	1562	820	838	897	2605	3068	100.008	200.023
Acsf3	104	44	69	97	45	26	104	119	90	77	682	704	39	44
Acsl1	1524	1441	1533	1632	1979	1725	1809	1699	1011	581	6861	6632	285	421
Acsl3	2181.9	2960.64	3031.89	2807.46	2251.49	2433.4	2972.86	2160.64	2023.95	1172.65	27900	19122.4	678.257	965.999
Acsl4	288	391	426	439	469	370	474	495	324	284	3627	4722	96.0001	144
Acsl5	42	41	86	51	17	31	27	20	184	147	205	523	8	24
Acsl6	2	4	4	11	4	0	20	0	5	0	35	109	0	0
Acsm1	0	0	1	0	0	0	0	0	0	0	0	0	0	0
Acsm2	373.917	226.946	209.336	321.185	366.961	314.593	252.555	295.958	558.579	556.183	31.7899	116.247	40.2522	48.8778
Acsm3	6.2887	8.61115	9.74023	6.39287	24.6541	5.21901	24.5753	4.33501	7.58492	11.6719	63.1761	139.674	3.85957	2.53796
Acsm4	5	2	1	1	9	12	0	0	0	0	0	9	1	1
Acsm5	0	0	0	0	0	0	0	0	0	0	1	0	0	0
Acss1	187.745	111.857	147.25	180.474	462.07	351.428	502.623	447.474	679.385	474.128	474.829	2042.95	41.9641	76.2465
Acss2	365.764	518	653.759	528.868	757.209	759	632	615.94	402	143	5101.91	5111.91	268	361
Acss2os	6.23574	17	7.24069	10.1319	23.7914	5	11	5.06049	3	5	1.09027	3.08842	0	0
Acss3	8	2	5	4	7	7	11	7	75	44	78	179	5	5
Acta1	5.01228	0	6.012	1.00078	6.00607	5.00398	0	5.00594	7.08781	4.04672	30.6844	23.0112	1.0184	2.04214
Acta2	48	207.007	111.031	458.016	8.00263	14	12.0003	17	419.153	239.066	405.841	5581.46	9.10205	15.1863
Actb	13957.6	13542.1	14575.6	13948.3	14095.4	16425.8	22596.9	14885.6	17035	13351.4	92774.8	87071	4524.83	8071.2
Actbl2	0	0	0	0	0	0	0	0	1	0	1	0	0	0
Actc1	0	3	1	0	0	0	0	1	0	0	0	10	0	0
Actg1	4449.27	4740.54	4932.4	4614.48	2765.57	3750.73	4469.71	3720.95	8353.86	5944.64	85707.3	84746.5	2535.58	4530.47
Actg2	25	20	7	55	4	35	9	2	5	6	42	164	1	2
Actl10	3	0	2	0	0	0	3	0	29	7	9	12	0	1.61492
Actl11	25	5	0	19	8	8	25	0	0	5	0	1	0	0
Actl6a	598	714	631	635	809	695	760	716	492	260	9540	8770	261.918	451.871
Actl6b	0	4	9	1	4	0	3	9	1	0	15	5	2	0
Actl7a	0	0	10	3	5	5	6	0	3	0	6	6	3	2.30843
Actl7b	11	13	10	1	8	1	74	37	6	8	20	20	1	0
Actl9	10	0	0	1	0	0	7	0	1	0	2	2	0	0
Actn1	229	238	282	261	184	68.0715	177.096	190	168	160	2539.48	2962.67	136.548	248.608
Actn2	564.573	766.645	763.342	742.351	875.153	1272.2	792.79	646.193	53.8281	34.8725	1217.49	869.593	241.822	325.788
Actn3	123	230	213	160	156	189	192	115	34	17	756.109	594	90.5647	127.288
Actn4	1563.28	1482.78	1770.96	1612.53	1769.75	1907.43	1734.52	1751.94	1446.65	989.774	9959.72	10895.2	393.433	620.373
Actr10	882.731	1041.37	1030.87	927.685	941.71	884.28	1187.51	636.573	894.353	749.883	9092.92	5532.42	462.682	656.647
Actr1a	708	790	895	969	567	545	1035	827	520	461	3473	4533	182	284
Actr1b	1249	1397	1417	1307	837	950	1204	827	788	489	5188	4413	164	268
Actr2	957.266	1256.33	1176	1049.73	1108.33	856.212	1194.8	699.183	1066.44	843.513	8110.39	7733.86	284.08	433.14
Actr3	2343	2796	2909	2915	2566	2837	3501	2381	2537	1486	25480	22863	724	1290.21
Actr3b	382	379	284	257	279	203	389	268	177	121	1941	1860	58	99
Actr5	163	127	172	205	117	146	121	126	69	33	3303	3207	108	164
Actr6	536.001	664	587	619	629	920	758	532	239	134	4472	3699	156	265
Actr8	444	471	521	542	675	562	805	570	243	171	3230	2735	173	260
Actrt1	0	0	0	0	0	0	0	0	0	0	0	0	0	0
Actrt2	0	0	2	2	0	15	6	0	1	0	0	0	0	0
Actrt3	0	1	5	1	0	0	0	7	2	0	4	7	1	0
Acvr1	165	159	267	198	57	23	17	26	1335	1116	944	1250	69	100
Acvr1b	1106.61	791	846.278	892	1066.27	1243.75	1165.4	974.527	322.481	246.451	3897.78	4591	177.194	266.268
Acvr1c	13	15	22	23	43	15	14.0331	20	37.1751	40	19.2122	28.1759	6	1.01204
Acvr2a	577.543	709.219	687.566	761.442	820.118	873.283	826.024	1163.87	853.69	533.189	2867.04	3130.32	152.393	210.657
Acvr2b	1963.37	1924.7	2073.42	2064.17	2487.25	1693.12	2272.84	1954.48	1169.65	757.559	13587.4	12978.1	335.389	540.897
Acvrl1	1	5	0	4	0	0	0	0	192	104	123	1946	8	4
Acy1	103	155	215	111	45	112	246	37	99	42	2330	2097	78	128
Acy3	222	195	125	153	271	318	261	232	115	134	468	407	40	64
Acyp1	201	380	223	229	174	256	327	177	131	74.0001	384	280	17	33
Acyp2	11	2	2	12	21	2	9	4	35	36	43	111	1	1
Ada	40	55	47	39	27	98	26	35	326	301	32	77	16	17
Adad1	958	933	873	993	1014	1080	1005	1224	190	132	2627	1918	208	281
Adad2	432	571	572	339	446	579	537	331	22	15	2353	1942	179	293
Adal	535	557	507	596	684	856	932.999	649	280	201	3410.01	3225.99	202	278
Adam10	764	751	820	913	1196	900	1008	926	1147	648	13507	15125	324	507
Adam11	75.2032	47.8732	37.8266	79.1032	166.479	184.436	189.026	56.2068	58.1616	34.0535	492.91	544.527	8.42876	20.4732
Adam12	122	74	59	91	62	113	37	42	2839	1800	354	1935	15	19
Adam15	505	648	581	721	520	625	610	504	485	282	6811	6941	120	180
Adam17	1069	1394	1363	1183	1760	1721	1942	1307	1376	906	13235	12218	362	575
Adam18	15	7	1	1	7	0	8	0	0	0	4	0	0	2
Adam19	391.992	449.395	353.744	469.854	525.48	769.348	641.882	985.837	1790.44	1126.8	1095.39	1363.93	69.3906	89.2825
Adam1a	15.9957	6.08402	15.0013	19	15.3881	0	52.6146	0	12.4952	18.8042	54.986	129.872	15.5956	13.7498
Adam1b	15.0043	61.916	13.9987	25	22.6119	11	32.3854	8	11.5048	1.19576	11.014	9.12809	8.4044	4.25022
Adam2	4	26	4	7	3	13	26	2	3	1	6	1	1	2
Adam20	2	0	5	0	0	0	19.4226	0	0	0	0	0	0	0
Adam21	0	0	0	0	5	1	7	0	14	4	5	6	0	0
Adam22	610.55	630.678	534.809	653.758	542.295	595.727	398.716	410.444	336.158	179.167	2132.61	2167.08	139.592	180.44
Adam23	593.017	579.166	639.316	768.27	996.379	784.675	829.424	1255.32	2073.73	1692.24	1457.85	1363.28	116.883	185.52
Adam24	1	2	0	0	2	0	24	0	0	0	0	0	0	0
Adam25	5	0	2	0	0	45	29.2675	0	0	0	0	0	0	0
Adam26a	0	1	1	0	1	0	35.8314	0	0	0	0	0	0	0
Adam26b	7	0	0	0	0	0	3.16858	0	0	0	0	0	0	0
Adam28	51.9539	67.3518	49.3763	48.682	83.5468	80.4816	77.7108	53.8964	38.5093	38.6329	100.375	96.7897	28.5857	26.8189
Adam29	0	0	0	1	0	0	15	0	0	0	0	0	0	0
Adam3	16	24	2	17	21	9	102	0	0	0	2	7	1	1
Adam30	8	15	2	26	9	1	23	0	36	23	31	20	3	1
Adam32	39	35	10	38	34	29	23	3	5	1	25	16	2	5
Adam33	31	14	65	26	130	96	135	46	0	10	40	74	4	4
Adam34	2	0	0	0	0	0	0	0	0	0	0	0	0	0
Adam39	0	2	0	0	0	0	2.30986	0	9	1	0	0	0	0
Adam4	31.7741	13	4	4	19	4	27.7634	15	18	8.68665	44.3423	30	8.79007	10.4209
Adam5	63	93	79	44	63	30	217	5	4	8	7	15	0	2
Adam6a	0	0	0	0	0	0	1	0	0	0	0	0	0	0
Adam6b	0	0	4	0	0	0	0	0	0	0	0	0	0	0
Adam7	2	0	2	0	1	2	0	1	0	0	14	2	1	0
Adam8	0	1	1	1	0	0	1	31.0001	70	59	37	118	2	4
Adam9	329	336	290	317	364	407	392	304	284	243	2250	3277	102	130
Adamdec1	0	0	0	0	0	0	0	0	10	0	0	3	0	0
Adamts1	41	26	66	44	26	0	0	2	2061	1628	331	2571	6	17
Adamts10	267	174	256	371	660	486.001	450.999	591	202	202	1154	2568	70.9999	147
Adamts12	17.3099	12.0436	13.2371	28.2648	40.9407	39.0386	18.2069	42.0645	1116.47	810.736	52.8279	866.289	9.40537	12.756
Adamts13	25.0814	15.9893	16.6193	16.3876	24.2836	21.3806	12.2776	33.1275	9.52631	2	10.1204	30.5271	0	1.05019
Adamts14	90.596	74.1346	110.748	101.531	7.37699	5.43164	56.2773	6.26943	128.098	75.7344	1947.88	1719.6	43.7754	71.4411
Adamts15	110	76	69	117	121	107	78	184	22	10	139	293	9	10
Adamts16	0	11	0	4	24	0	2	4	4	1	47	707	0	1
Adamts17	410.973	204.031	395.308	321.709	886.33	641.001	909.125	953.599	179.949	157.844	933.439	1140.56	74.5249	85.1002
Adamts18	11	21	5	10	74	20	3	21	5	9	78	66	3	7
Adamts19	72	119	109	117	71	33	32	85	150	53	1286	1141	29	55
Adamts2	389.45	455.961	482.776	446.987	691.813	574.238	694.873	609.596	1026.41	641.067	518.815	3522.65	91.773	110.403
Adamts20	193	155	209	147	272	78	232	142	28	13	323	306	37	67
Adamts3	219	142	166	183	413	411	364	374	101	61	1001	1118	58	90
Adamts4	159.116	160.502	157.657	196.388	180.084	148.38	205.319	190.424	252.585	199.323	293.284	749.93	18.1283	41.7762
Adamts5	27.0013	34.0026	35.0015	59.0028	29.0097	26	30.0017	12.0022	1965	1080	482.162	5634.15	5.00156	9.00094
Adamts6	28.0709	83.3314	106.375	76.1595	110.258	45.3205	106.162	30.2214	160.38	82.1724	207.072	511.155	25.0501	38.1536
Adamts7	49.0096	23.0039	68.0173	162.088	104.015	97.029	77.461	54.0101	310.257	208	967.102	2345.06	37	52.0233
Adamts8	9	27	60	23	44	5	13	34	5	21	233	457	6	4
Adamts9	77.1411	96.6789	118.517	97.1588	172.344	278.956	151.615	69.1326	616.206	470.568	474.642	3561.29	51.9942	56.5592
Adamtsl1	11	9	12	26	42	30	12	2	44	23	78	268	9	9
Adamtsl2	0	0	0	0	0	0	0	0	21	19	31	345	0	0
Adamtsl3	16	8	20	8	39	16	18	0	14	9	64	108	5	4
Adamtsl4	75	40	93	49	126	121	130	48	169	128	431	476	17	33
Adamtsl5	0	5	13	7	0	0	0	0	19	19.0001	146	291	0	0
Adap1	196	135	207	120	36	156	61	8	37	18	1079	842	102	149
Adap2	2	8	4	6	0	2	6	0	27	22	14	25	0	0
Adar	1361	1161	1268	1233	1181	788.001	1120	1001	357	205	10375	9983	470	677.999
Adarb1	815.03	811.658	640.547	881.677	808.138	1025.31	870.902	743.562	297.139	185.745	5474.18	4613.77	202.589	310.326
Adarb2	112.751	120.48	151.96	109.271	136.5	142.664	173.452	119.101	74.6655	73.4062	164.565	269.821	32.5669	50.3649
Adat1	639.757	710.407	629.194	597.935	639.371	595.962	602.302	642.795	154.794	146.052	1288.82	1313.74	160.52	217.86
Adat2	32	62	47	106	56	33	90	88	41	22	394	404	26	30
[truncated: 22,982 more rows]

## Sheet: TPMs
gene.id	PDX1.GFP.neg.1	PDX1.GFP.neg.2	PDX1.GFP.neg.3	PDX1.GFP.neg.4	PDX1.GFP.pos.1	PDX1.GFP.pos.2	PDX1.GFP.pos.3	PDX1.GFP.pos.4	KIT.pos.1	KIT.pos.2	KIT.pos.Pouf51.GFP.pos.1	KIT.pos.Pouf51.GFP.pos.2	3S.gonia.1	3S.gonia.2
0610005C13Rik	0.37721	0	0	0.30015	0.196003	2.26036	0.434666	0	0.477052	1.21341	0	0.279475	0	0.397722
0610009B22Rik	40.8736	51.0807	32.9163	37.8975	44.5703	44.3407	62.1827	42.0598	53.0489	59.8669	34.6503	32.9917	29.3183	22.5002
0610009E02Rik	4.05246	4.45955	3.88759	5.62842	8.28213	7.08311	9.28447	0.496672	1.06398	0	6.54436	4.27705	2.05367	2.56152
0610009L18Rik	4.33624	3.83542	3.86245	3.20581	0.386772	2.01268	1.40802	0.825109	3.39142	4.20529	4.27281	5.18519	13.456	11.9937
0610010B08Rik	3.37791	3.81357	6.1761	3.30758	9.37351	3.42986	6.77555	11.7643	3.1312	5.57503	15.7276	12.5874	48.4797	16.2897
0610010F05Rik	12.6267	11.1372	13.8867	13.8623	15.6456	9.67176	12.6903	17.9357	10.756	10.5565	22.5041	24.1137	23.5312	22.1806
0610010K14Rik	250.952	219.623	265.332	261.24	237.599	251.863	253.798	289.764	87.3203	89.6061	343.499	263.75	252.748	271.376
0610012G03Rik	15.19	16.2448	16.7733	22.3006	21.1185	18.4996	15.2153	19.1995	19.4889	18.9613	33.1743	30.1819	49.1077	33.2194
0610030E20Rik	16.0901	13.4132	15.3484	12.1875	16.0078	16.9395	12.4067	16.4159	16.7056	23.0219	15.9544	20.49	16.5872	13.46
0610031O16Rik	0	0	0.168158	0	0	0	0	0	0.234641	0	0.0992545	0	0	0
0610037L13Rik	58.6837	44.2088	44.1811	43.0283	43.2948	35.0822	55.244	58.7422	27.3747	35.2809	39.081	38.7559	34.3034	29.8914
0610038B21Rik	14.446	8.18201	7.11989	10.4961	12.5052	5.8206	4.30881	5.90802	2.09075	2.88512	2.26628	3.27902	9.25244	6.84266
0610039H22Rik	4.1929	0.389601	2.15347	2.33723	6.77699	0.220876	1.50589	2.4181	1.40981	0.423733	0	0	6.36354	6.30702
0610039K10Rik	1.86519	3.72005	0.82758	0.962164	2.35559	1.26119	1.32124	3.44031	0.594657	5.39472	0.869934	0.88199	3.40163	5.32246
0610040B10Rik	7.18365	1.90341	2.52641	3.12184	4.89819	0.715965	10.3017	4.39762	0.94206	0	5.51339	9.0123	18.8728	0
0610040F04Rik	3.62162	3.35484	1.84442	3.01876	6.39443	3.78611	5.72486	5.7791	1.02289	5.55421	0.439788	0.0202649	1.35295	0.950328
0610040J01Rik	0	0.399008	0	0.113175	0.446559	0.192411	0	0.156824	1.11134	0.12195	0.391169	0.349785	0.306443	0
0610043K17Rik	10.1253	1.66928	5.58524	5.54933	16.4696	21.7658	2.96338	5.83612	0	1.82623	0	0.434782	3.85757	2.40679
1010001N08Rik	0.423918	0.681247	0	0	0	0	0	0	0.45327	1.57305	0.193622	4.90253	0	0
1110002J07Rik	4.49775	3.93932	2.71635	4.20644	8.01321	7.27534	5.07569	7.4552	4.03371	3.5827	0.228795	1.003	1.16261	0.177574
1110002L01Rik	2.72244	2.70904	3.41592	3.48424	3.36846	5.25565	3.24428	5.91835	2.52895	2.59467	6.69742	6.83526	9.97899	7.53661
1110004F10Rik	63.9901	63.5232	62.5539	71.6994	66.9144	75.8602	79.4897	67.7893	70.7376	77.6811	163.833	154.967	106.355	118.425
1110006O24Rik	8.83502	9.52315	2.31485	5.71229	5.89037	0.221654	6.14387	7.89522	3.26073	5.22941	8.06811	6.67388	5.10376	9.79501
1110008L16Rik	59.8778	46.4381	47.7134	50.936	81.3974	58.1849	50.8491	82.3414	24.4999	32.5901	26.4799	27.9136	40.5536	37.8582
1110008P14Rik	167.188	146.844	142.833	140.966	102.738	92.4049	129.206	99.9199	121.604	140.189	147.787	106.533	138.993	117.795
1110012L19Rik	15.1512	16.9766	10.5763	13.0474	29.689	22.7156	28.6159	10.3415	11.9913	9.28214	34.5776	30.1759	37.2671	41.2315
1110015O18Rik	0	0	0	0	0	0	0	0	0	0	0	0.0271244	0	0
1110017D15Rik	4.34857	4.15316	2.33633	0.43506	2.45864	0	2.66865	2.03184	0.725436	0.30112	0.862023	0.592163	0	0
1110019D14Rik	3.84523	3.00727	4.38349	6.56609	4.29045	4.55577	4.00724	7.81054	1.45139	1.58609	4.0336	3.62969	6.59844	2.96048
1110020A21Rik	1.58222	5.58032	4.21401	6.6776	12.6265	0.177851	6.88574	10.7924	2.29687	4.1428	1.66404	1.09446	2.02442	7.88849
1110025L11Rik	0	0	0	0	0	0	0	0	0	0	0	0	0	0
1110028F11Rik	0	0.250617	0	0	0.4138	0.080914	0	0	0.101665	0.155246	0.0109375	0	0.451985	0.795053
1110028F18Rik	0.19065	0.709577	1.19966	0.423702	0.996171	0	0.964442	2.22492	0	0.181786	0.0250848	0.225578	0	0.345061
1110032A03Rik	12.992	9.46485	12.5566	11.3962	22.8621	20.4447	13.044	23.7046	21.2144	21.9524	6.72395	6.66448	10.6926	9.88477
1110032F04Rik	0.181075	0	0.718039	0.547889	0.208407	0	0.0381808	0.278584	0	0.525051	1.55645	2.77017	1.5843	0.962234
1110036E04Rik	1.26821	1.3167	0.377111	0.186451	0.24709	1.06049	2.16854	0	0.799426	0.811161	0.10738	0.0584661	0	0
1110038B12Rik	139.642	146.049	146.998	148.899	64.0086	123.575	113.79	102.4	108.99	139.083	72.7067	92.0558	147.189	121.375
1110038F14Rik	28.0935	25.2125	23.9187	19.2949	17.4042	13.732	25.5278	12.9224	12.1822	10.103	36.0565	33.567	39.6942	47.8189
1110046J04Rik	14.3426	10.8222	17.8831	18.9005	27.6043	17.2579	25.2737	28.5701	6.68043	11.1291	1.9513	6.03293	8.40782	4.96172
1110051M20Rik	10.9427	9.53979	12.9778	10.9514	22.8373	20.0286	14.1329	15.2283	9.76501	10.8141	28.0874	28.0851	26.9825	30.8072
1110058D11Rik	2.80316	3.46475	7.39982	4.94127	7.39893	0	9.0186	5.17784	2.3034	0.509445	0	0	3.18148	5.85089
1110059E24Rik	54.224	60.359	47.6203	42.2034	61.8581	38.7273	53.8545	64.0448	47.5395	42.0831	55.1991	51.3197	78.5988	77.1099
1110059G10Rik	4.9619	5.43015	5.70618	3.67795	4.98523	8.03782	6.09331	7.2512	3.96632	3.35864	13.7986	12.0443	6.82908	7.43886
1110065P20Rik	22.0704	22.2386	21.6104	19.9171	25.1274	19.5029	25.1598	8.20725	26.0443	26.2657	65.0485	81.9574	57.3423	60.1607
1190002N15Rik	18.1284	14.0728	13.6353	19.3512	33.7211	25.1294	17.7638	27.3283	25.5516	25.2355	65.289	59.256	39.2856	34.3367
1190005I06Rik	0	0	0	0	0	0	0	0	1.04716	0	0.470768	0.195057	0	0
1190007I07Rik	30.829	15.9699	22.5367	21.0363	23.1744	26.812	21.1582	20.6286	8.20314	14.3875	38.0678	34.6133	31.4105	33.1946
1190028D05Rik	15.2147	15.4915	10.524	17.564	31.7568	23.6276	26.6142	25.683	2.87981	2.43864	1.83773	5.22244	8.8385	9.72239
1300002E11Rik	79.6734	67.1842	73.629	59.0188	39.56	36.091	45.0758	60.0004	53.7859	49.0476	18.05	14.6893	40.4806	29.714
1300017J02Rik	0.928468	2.14194	1.27343	1.04044	0.946081	1.49029	0.959301	0.818343	0.260309	0	1.76019	1.74283	1.86812	3.28756
1500004A13Rik	16.0358	12.2936	13.5268	17.0655	28.7901	22.2593	18.0394	23.3832	8.90779	14.0866	17.6012	14.6573	13.3417	14.4738
1500009C09Rik	0	0	0	0	0.19432	0.340547	0.0709639	0	0	0	0.120591	0.044951	0	0.259631
1500009L16Rik	36.865	18.8601	24.4604	40.4927	83.2544	51.2544	90.2781	116.906	72.9229	66.5235	15.1241	29.8	19.8578	25.4661
1500011B03Rik	88.4315	78.5788	83.8066	99.3289	70.0256	68.615	84.89	105.905	16.8585	15.236	76.2362	65.1899	36.7298	41.1483
1500011K16Rik	10.9149	6.82782	13.3257	12.148	17.036	8.00373	19.4019	15.1774	10.8781	9.97205	7.8596	15.3385	10.3174	6.66552
1500012K07Rik	9.11985	8.20636	9.80374	8.12346	21.3495	10.9675	15.8427	26.1277	6.97824	12.032	1.98264	7.94893	24.898	10.2267
1500015A07Rik	8.11551	10.576	14.4212	11.5748	9.51981	9.99539	9.69746	9.3421	7.18847	7.72968	33.3135	23.4227	21.9411	20.3883
1500015L24Rik	0.833379	0.547216	1.28683	1.79112	0	0	0.35302	0	0	0.383776	0.0559356	0	1.23978	2.23241
1500015O10Rik	0.843915	0.149569	0.60175	0.294042	1.76958	0	0	0.83015	4.44361	1.36416	0.125785	1.23588	0	0
1500026H17Rik	12.769	11.5043	13.0933	12.0408	21.8325	13.3322	15.1881	24.9448	3.52437	3.26367	1.20632	6.183	3.06623	3.54759
1600002D24Rik	0	0.341727	0	0	2.00941	0	0	0	0.0794781	0	0	0.111969	0	0
1600002K03Rik	4.4536	9.13012	5.99683	4.40464	6.44366	4.20297	5.30994	0	5.30358	1.71681	24.0753	20.787	14.0661	14.5463
1600010M07Rik	1.60988	3.35901	3.35082	1.9592	2.21495	0.961726	5.71249	11.9331	0.421537	0	0.167808	0.630504	1.94191	2.14977
1600012H06Rik	20.2936	14.8332	23.6875	24.8769	22.6368	18.792	12.9767	24.9665	29.6089	28.8544	40.8726	39.5842	24.9225	23.0488
1600014C10Rik	1.3077	1.83985	1.1221	1.1053	1.1813	0.771845	0.708568	1.16608	9.87453	11.8193	3.13695	5.76691	3.64573	2.30712
1600014C23Rik	0.9447	0	0	0	0.536788	0	0	0	1.85831	0	0.35083	0.526747	0	0
1600015I10Rik	0	0	0	0	0	0	0	0	0	0.245469	0.011931	0.0132172	0	0
1600019K03Rik	0	0	0	0	0	0	0.490234	0	0	0	0	0	0	0
1600020E01Rik	51.3663	37.3175	35.7035	26.5928	62.0897	53.2766	61.6579	51.4648	11.6395	8.10731	35.0607	27.9387	54.6859	65.4501
1600023N17Rik	7.59883	7.16495	4.14216	5.18153	1.29083	4.92777	3.1142	2.09832	3.65696	1.07259	4.2731	2.8897	3.18065	4.88579
1600025M17Rik	0	0	0	0	3.31813	0	0.351862	0	0	0	0	0	2.53743	0
1600027J07Rik	0	0	0	0	0	0	0	0	0	0	0	0	0	0
1600029I14Rik	0.886822	0.15837	0.629561	0	0	0	0	0	1.14678	0	0.0449231	0.203471	3.15003	0.628311
1600029O15Rik	7.69909	7.2336	7.77954	8.29361	16.1691	9.07529	7.96828	14.1423	3.3678	6.27296	7.57908	2.22048	2.73253	2.01732
1700001C02Rik	0.760163	0	0	0.666856	0	0	0.643205	0	0	0	0	0.0698636	0	0
1700001C19Rik	4.8688	5.47859	8.66081	6.03441	11.102	15.8239	7.38169	9.49918	4.02888	1.71447	3.96048	2.29622	10.7147	7.36108
1700001D01Rik	0.777779	0.343472	3.4192	0.338004	0.441942	0	0.328052	0	1.52996	3.48593	0	0.108419	2.34947	0
1700001F09Rik	3.18098	1.37077	3.46722	1.08024	18.8469	8.29246	10.9587	1.7756	1.57634	0	0	0	1.89527	0
1700001G01Rik	0.077499	0	0	0	0.36015	0	0	0	0	0	0	0	0	0
1700001G11Rik	0.6529	1.71782	0.772142	0	2.77234	2.39017	0	4.28041	0.280797	0	1.43569	1.17276	1.08596	0.696752
1700001G17Rik	2.86587	1.27006	0.316283	0.944734	0.822449	0	0.903932	0.658679	0	0	0.875925	0.913331	0	1.26786
1700001J03Rik	1.22406	0.897262	0.541439	0.177787	1.66384	0	0	4.00619	0	0	0.805484	0.683801	1.29922	2.32538
1700001J11Rik	1.05178	0.700348	0.891812	0.397413	1.0241	0.195407	2.33574	1.55763	0.600574	0.669538	0.36656	0.481479	0	0
1700001K19Rik	0.619488	0.13716	0.690055	0.957333	1.80097	2.33336	0.927679	0	0.811444	2.1627	0.568232	1.06698	0.84629	0
1700001K23Rik	1.01416	0	1.33752	1.32219	6.9151	1.51616	0.855507	0.620841	0.664984	1.03393	0	0.14137	0	0
1700001L05Rik	26.0529	26.3231	26.6871	27.1859	28.11	30.5611	24.2557	29.7239	17.1161	17.5839	58.1168	62.7966	22.4198	23.7666
1700001L19Rik	3.69254	4.1127	3.03432	2.46327	4.49883	0.978713	5.761	1.36622	2.59928	0.99627	1.60981	1.18298	2.61199	2.22844
1700001O22Rik	1.04069	0.138981	0.888122	0.563722	1.44728	2.05533	1.04909	1.57805	0.604213	2.02389	1.08602	0.828319	1.32279	0.24908
1700001P01Rik	0.610903	0.8021	0.267975	0.805367	2.86381	0.92	1.29444	0	1.22402	2.49998	0.46954	0.348819	0	0
1700003C15Rik	0	0.210165	0.212093	0.208643	0	0	0	0	0	0	0	0	0	0
1700003D09Rik	0.0942231	0.083299	0.249546	0.652326	0	0	0.318454	0	0.112428	0.510439	0.514409	0.468643	0	0
1700003E16Rik	0.17759	0.209704	0.469554	0.409687	1.36655	0.535654	2.56338	0.145561	0.233326	0.468097	0.783693	1.03352	2.63745	1.63322
1700003E24Rik	3.41946	0	0	0.821491	2.73107	0.177126	0	0	0	0	3.08189	0.439783	0	0
1700003F12Rik	1.9285	3.02537	2.79395	0	2.24083	0	0.820897	0	0.697513	0.503058	1.06598	0.86593	0	0.729331
1700003G13Rik	0	0	0	0	0	0	0	0	0	0	0	0	0	0
1700003G18Rik	3.0677	0.542105	1.08495	0.800966	4.30087	3.98502	3.62181	3.01382	0.764734	0.578832	1.581	0.652275	1.91584	5.97687
1700003H04Rik	0.650403	0	0	0	0	0	0	0	0	0	0	0	0	0
1700003I22Rik	0	0	0.496999	0	0	0	0	0	0	0	0	0	0	0
1700003L19Rik	0	0	0	0	0	0	0.746474	0	0	0	0	0	0	0
1700003M07Rik	3.7407	5.08607	3.93976	4.66625	13.1056	6.66632	5.29108	12.19	13.7002	13.7872	1.95256	2.14251	12.3264	11.33
1700003P14Rik	0.280109	0.736532	0.489732	0	0.163124	0	0.236756	0	0	0	0	0	0	0
1700006A11Rik	0.174551	0.610978	1.48267	1.05999	0	1.49989	0.147486	0	0	0	0.0800341	0.017698	0	0
1700006F04Rik	0	0	0	0	0	0	0	0	0	0	0	0	0	0
1700006H21Rik	0	0	0	0	0	0.323701	0.824865	0	0	0	0.624099	0.345768	3.80613	0
1700007F19Rik	0.500628	0.315928	0	0.247547	0.334495	0.856407	1.03232	0.700282	0.17442	0	0.0198851	0.0896904	0	0.237494
1700007J10Rik	9.38606	8.70228	8.31494	9.48497	18.7022	16.9587	16.8079	14.2182	10.0475	8.82805	6.19505	2.13508	77.5268	49.9097
1700007K13Rik	2.82667	1.95744	2.1528	1.41299	8.92403	1.83421	2.2324	2.24172	5.63491	6.89432	1.94581	1.69407	2.59069	3.14941
1700007L15Rik	9.66793	8.29763	5.35273	9.1057	14.5442	1.33637	7.97183	5.98838	14.7032	3.64092	11.9951	12.4078	5.46453	7.98708
1700007P06Rik	9.45623	6.4814	8.16625	7.48379	21.2248	6.74632	11.6708	23.3355	5.1439	1.12285	0.240102	2.07885	0.998265	2.5263
1700008C04Rik	4.36189	4.95291	5.50657	6.86657	13.3583	12.1296	4.29597	6.48851	2.7754	3.42149	0.631227	0.468515	6.07723	2.49678
1700008J07Rik	10.2839	6.68147	8.90157	7.16559	8.06866	12.0073	8.06325	6.51738	12.6961	12.9885	10.9279	9.29974	13.0524	14.9699
1700008K24Rik	1.24187	2.8078	5.83549	4.19176	1.23941	3.58939	8.26912	0.627268	0	0	0.323776	0	0	0
1700008O03Rik	1.67627	1.3361	4.13182	1.31207	3.08637	0.674657	0.710846	4.75567	0	1.04601	1.7745	1.21686	7.58561	1.09509
1700008P02Rik	0	0	0	0	0	0	0	0	0	0	0	0	0	0
1700009C05Rik	0	0	1.25937	0.35873	0	1.42163	0.172835	0	0	0	0.0542661	0.060955	0	0
1700009J07Rik	0.330012	0	0	0	0	0.649086	0	0	0	0	0	0	0	0
1700009N14Rik	0.930024	0.818711	1.45776	0.71562	2.26569	2.46197	1.13507	0.377397	0	0	0.0265499	0	0	0
1700010B08Rik	1.48358	1.90759	2.79615	2.9481	3.79695	2.13217	3.49749	5.03317	1.17532	0	0.699921	0.823392	0	2.18029
1700010D01Rik	0.507081	0	0	0	1.15251	0	0.427753	0.620841	1.89037	4.01531	1.49733	1.7586	1.81043	1.95963
1700010I02Rik	88.6354	47.7126	62.5498	75.3822	155.506	135.501	86.4968	219.262	24.9492	16.6225	4.01492	16.534	7.42465	0
1700010I14Rik	0.381992	1.23192	1.32967	1.40687	6.32503	1.57779	6.16197	3.61246	0	0.25686	0.515239	0.683825	1.17615	1.65487
1700010J16Rik	0	0	0	0.431002	0	0.658926	0	0	0	0	0	0.0519357	0	0
1700010K23Rik	0	0	0	0	0	0	0	0	0	0	0	0	0	0
1700010N08Rik	22.7862	16.4489	14.5575	23.402	38.9197	19.2009	27.8882	25.6083	2.19603	3.65027	6.23341	9.33883	27.6563	16.3567
1700011B04Rik	3.21128	0.256371	0.256935	0.754256	4.36553	2.01849	12.266	0.716239	0.689163	0.53705	0.466942	0.245011	3.50259	1.00379
1700011C11Rik	0	0	0	0	0	0	4.00921	0	0	0	0	0	0	0
1700011L22Rik	0.30013	0.132106	0.265326	0.381235	0.855493	0.149433	0.762222	2.20704	0	0	0.036578	0	0	0
1700011M02Rik	1.70978	0	6.01309	0	0	0	2.16345	0	0	0	1.41946	5.95836	0	10.7531
1700012A03Rik	1.48297	1.30803	0	0	0	0	0	0	0	0	0	0	0	0
1700012B07Rik	11.9117	6.85318	10.2258	9.78696	18.0044	11.2432	18.7522	13.4246	1.44075	1.23493	6.49312	4.79334	14.317	12.1248
1700012B09Rik	2.41249	0.709532	0.707647	1.64931	2.17271	4.58092	3.40832	0	1.64243	0	0.532436	0.220371	0	0
1700012C14Rik	0.519823	1.37734	1.37111	0.451805	1.18147	1.03617	3.9465	0	0.681691	0	1.02958	1.44921	3.24388	8.05869
1700012D01Rik	21.7953	20.7291	27.5515	14.5342	6.90491	4.70499	9.30675	4.48259	1.9892	3.04368	7.09575	5.73064	52.041	50.1813
1700012D14Rik	3.16397	3.10241	2.26003	2.78137	9.24501	4.19716	6.24147	6.30226	2.16651	8.55471	2.7835	7.871	1.85968	4.64222
1700012D16Rik	0.715881	1.89682	0.314709	2.48884	1.22031	0.713489	1.50971	6.57361	0	0	0	0.0997902	2.14632	2.67621
1700012H19Rik	0	0	0	0	0	0	0	0	0	0	0	0	0	0
1700012I11Rik	0	0	0	0	0	0	0	0	0	0	0	0	0	0
1700012P22Rik	1.32918	0	0.129787	0.37419	0.848646	0	2.64536	0	0	0	0	0	0.831041	0.513401
1700013D24Rik	0	0	0	0.38097	0	0.87372	1.84876	0	0	0	0	0	0	0
1700013F07Rik	0.353054	0.311821	0	0.920571	0.401217	0	6.25425	0.432258	0.451922	0	0.961491	0.393712	6.34357	5.27371
1700013G24Rik	8.85161	1.56993	1.57088	0.602483	5.84276	10.6835	6.56627	0.166116	0	0	0.0336273	0	0	0
1700013H16Rik	4.61971	3.41094	5.27455	3.97215	2.81013	4.3858	2.854	2.70687	9.32026	7.04764	84.3238	69.0395	39.9739	30.0214
1700015F17Rik	4.74427	3.76228	3.13399	1.67661	0.554981	3.31513	9.05569	0	0.582923	0	0.982901	0.220923	0	2.82651
1700015G11Rik	1.16029	0	2.0403	1.00846	7.91143	0	0.978769	12.7853	6.08637	0	0.287261	0	0	0
1700016A09Rik	3.90255	4.8845	3.103	2.94492	1.53679	0.211851	4.89456	0.517399	0.620663	0	1.17186	2.51387	6.55527	6.94492
1700016C15Rik	0	0.190406	0	0	0	0	0	0.26691	0.580495	0	0	0	0	0
1700016D06Rik	20.1965	18.3333	14.8192	20.86	33.6363	20.5969	27.9666	33.7771	8.0742	12.3432	2.61602	4.59617	11.846	6.26072
1700016G22Rik	0	0.599652	0	0	0	0	0	0	0.822654	0	0.0871109	0	0	0
1700016H13Rik	0.781534	0.689318	1.44288	0.728856	0.238926	1.02149	0	0.24987	0.603156	0	0.470621	0.348974	0	0
1700016K05Rik	0	0	0	0	6.89667	0	0	1.48605	4.77513	0	0	0	0	0
1700016K19Rik	26.9169	30.447	26.8393	32.4549	42.9209	20.194	33.5656	17.587	13.3924	11.2687	17.0593	12.9848	30.1919	23.4664
1700016L04Rik	2.26991	1.84693	4.26356	2.51927	4.25854	0.791256	2.58475	2.15092	1.16399	0	1.47236	2.05775	6.41348	3.31729
1700016L21Rik	0	0	0	0	0	0	0	0	0	0	0	0	0	0
1700016P04Rik	0	0	0	0	0	0.793063	0	0	0	0	0	0	0	0
1700017B05Rik	19.3841	10.2004	15.7262	23.2729	37.1851	29.8324	35.2008	45.3533	24.5195	24.1792	14.6661	39.8413	20.3562	19.414
1700017D01Rik	1.09061	1.23871	0.768514	1.04669	3.54361	0.749471	1.74448	1.31281	0.266143	0.414133	0.371028	0.241593	0.798308	0.455973
1700017G19Rik	0.18298	0.0804575	0.121195	0	0.0529817	0	0.154651	0	0	0	0.024683	0.0139218	0	0
1700017J07Rik	2.33773	0.516179	0	0	0	0	0.986008	0	0	0	0	0	0	0
1700017L05Rik	0	1.0343	0.343211	0.33928	0	0	0	0	0	0	0	0	0	0
1700017N19Rik	0.210045	0.184284	0.185382	0.599511	0.0813081	0.699719	0.238621	0.949045	0	0	0.0566479	0.126549	0	0
1700018A04Rik	0	0.218002	0.434124	0.215954	0	3.17594	1.45007	0	0.304812	0.469963	0.122952	0	0	0
1700018B08Rik	1.26415	2.11289	1.34874	1.12183	0.884805	1.01232	2.67697	0	0	0	2.95655	2.18858	1.85897	1.56514
1700018B24Rik	17.9317	13.1696	12.7652	15.4421	21.2215	13.2665	11.9168	20.5061	5.91257	5.08591	20.3256	16.6934	13.0044	11.5309
1700018F24Rik	0	0	0	0	0	0	0.307095	0	0.153798	0	0.092225	0.0701371	0	0
1700018G05Rik	5.01988	1.77345	0.882718	0	0	0	0	17.209	0	0	0.248562	2.5191	0	4.35739
1700018L02Rik	0.681329	0.103927	1.38307	1.40112	0	0.335524	2.34778	2.05473	2.18433	2.12894	0.247616	1.08671	1.11345	0.352076
1700019A02Rik	8.50552	5.31428	4.77977	7.1279	21.0513	25.0614	9.04704	12.3847	1.72776	1.06743	8.34691	6.71512	5.6156	10.5131
1700019C18Rik	13.0455	19.7519	21.3012	22.677	19.0609	17.6454	18.8651	20.5356	2.44397	1.89995	13.8419	9.35217	12.9504	43.7623
1700019D03Rik	3.46397	2.03362	1.51706	2.03359	0.671531	7.39391	1.30495	2.12925	2.67318	0	1.16981	1.86507	0	0.650566
1700019E08Rik	9.76061	6.23645	8.60251	12.6533	16.528	5.48444	6.42655	12.8851	0.702353	3.21897	3.56528	5.71968	7.2961	8.42294
1700019G24Rik	0	0	0	0.416245	1.63273	0	0.807979	1.75905	0	0	0.711406	0.133516	0	0
1700019M22Rik	0.321648	0.565647	0	0	2.25586	4.4349	5.14801	0	0	0	0.0845236	0	0	0
1700019N19Rik	2.78242	1.44293	0.289046	0.708294	0	0.162484	1.24592	0	0	0.626371	0.161471	0.0448149	1.43473	0.447673
1700019P21Rik	0	0	0	0	0	0	0	0	0	0	0	0	0	0
1700020A23Rik	0	0.669306	0	0	0.882144	0.511133	0	0	0	2.55147	0.560602	1.16288	3.77459	1.57979
1700020D05Rik	0.967411	0.975422	1.33896	2.07051	0.962466	1.54028	5.96776	0.169955	4.28349	1.59747	7.54056	5.78841	2.91165	0
1700020D14Rik	0	0.138214	0	0	0	0	0	0	0	0	0	0	0	0
1700020G17Rik	0.985458	2.8628	1.44583	2.29124	6.02411	1.62285	4.96891	1.59004	2.75979	7.81457	0	0	0	1.0774
1700020I14Rik	51.893	52.4884	56.569	51.4894	56.2374	33.7345	52.2543	36.9931	65.5873	66.8181	108.503	124.687	96.6907	84.7121
1700020L24Rik	0.513359	0	1.35694	0	1.95216	0.347202	0.709745	0	0.57549	0	0.192788	0.752345	0	0
1700020M21Rik	0	0.264826	1.07923	0.263333	1.37838	0.595216	1.01111	0.364622	0	0	0.231174	0.838042	0	1.1137
1700020N01Rik	14.9132	9.48051	7.57529	12.4801	12.4365	5.19877	9.17551	6.2209	2.23657	1.69127	6.63876	4.02982	13.2759	16.1449
1700020N15Rik	0	0	0	0	0	3.75665	1.76643	0	0	0	0.60892	0.233517	0	0
1700020N18Rik	0	0	0	0.362537	0	0	0	0	0	0	0	0.116288	0	0
1700021F02Rik	0	0	0	0	6.93793	0	6.86665	0	0	0	0	0	0	0
1700021F05Rik	47.3534	47.2621	44.6219	40.4905	55.8854	52.8003	66.8213	38.1043	27.5745	47.9778	47.845	36.1966	83.9398	79.9969
1700021F07Rik	3.5833	14.224	5.76444	3.41793	10.3045	11.905	16.2974	0	0	4.69394	2.1271	0.988206	6.0333	7.5867
1700021N21Rik	0.168658	0	0	0	0	0	0	0	0	0	0	0.0932837	0	0
1700022A21Rik	0.607183	0	0	0	0	0.173695	0.367658	0	0	0	0	0	0	0
1700022A22Rik	0	0	0	0	0	0	0.150837	0	0	0	0	0	0	0
1700022E09Rik	0	0	0	0	2.72732	0	0	0	0	0	0	0.334538	0	0
1700022H01Rik	0.784703	0.232237	0	0	0	2.90021	0.444825	0	0.319715	1.95068	0.601359	0.757313	1.50856	0.891497
1700022H16Rik	0	0	0	0	0	0	0	0	0	0	0	0	0	0
1700022I11Rik	0.0291731	0.206089	0.0517531	0.511652	0.101598	0	0.86715	0	1.30132	2.24506	0.14204	0.0663096	0.162391	0.298964
1700023C21Rik	4.5904	1.01358	1.009	0	2.60832	4.57507	0	0	0	0	0.284121	0	8.39102	0
1700023D09Rik	23.5287	2.34104	15.0252	5.07419	10.9587	9.6872	18.0376	8.08842	1.34809	2.02498	10.5261	9.64946	10.1821	3.23804
1700023F02Rik	0	0	0	0	0	0	0	0	0	0	0	0	0	0
1700023F06Rik	0.335096	0.395821	0.0987717	0	0	0.562028	2.2846	0.136942	0.149617	0	1.33643	1.53409	0.565099	1.0335
1700024B18Rik	0	0.736788	0	1.45012	0	0	3.51855	0	0	0	0	0	0	0
1700024F13Rik	12.6003	18.3877	20.5548	12.4228	9.93549	18.2224	12.5297	9.1957	1.95697	2.96336	7.20957	7.51779	12.3251	16.0367
1700024G13Rik	2.06788	0	0	0.898652	5.87495	0	2.61658	2.53179	0	0	0	0	7.36997	4.51701
1700024I08Rik	1.0668	0.186895	0	0	0	0	0.17859	0.77123	0	0	0.113978	0	1.29502	0.772813
1700024N05Rik	0	0	0	0.443896	0	0	0	0	0	0	0	0	0	0
1700024P04Rik	0	0	1.02769	0	0	1.74744	0	0	0	0	0	0.325869	0	0
1700025B11Rik	0.407262	0	0	0	0.462821	0.811803	2.7484	0	0	0	0	0	0	0
1700025C18Rik	0.97321	0	0.216178	0.649982	0.286731	0.245684	0.2076	1.20233	1.91042	0	0	0	0	0
1700025F22Rik	0	0	0	0	0	0	0.251917	0	0	0.561531	0	0	0	0
1700025F24Rik	2.14559	0.145589	2.48134	0.436675	0.769571	4.11777	2.53026	2.41494	0	0	0.516675	0.389481	3.90794	4.09495
1700025G04Rik	4.46085	4.26659	3.58433	2.94768	4.19006	3.84468	2.75873	5.42823	16.8774	23.4144	5.06132	7.4799	4.72197	5.25374
1700025J12Rik	0	0	0	0	0.34901	0	0	3.69498	0	0	0.152777	0	0	1.0576
1700025K24Rik	2.52931	3.02624	6.47102	3.43646	5.02574	6.11904	4.82479	3.0663	1.09653	0.421277	0	0.140887	0	1.70792
1700025M24Rik	0.569268	0	1.31813	0.651515	0.851859	0.747095	0	0	0	0	0	0.208981	0	0
1700025N23Rik	15.5034	19.1973	22.8975	21.3511	43.1351	21.319	28.6122	28.9003	8.60537	16.406	1.0775	2.3013	5.69874	5.48541
1700026D11Rik	1.3381	3.84984	3.69284	1.31575	10.8468	2.16504	0.322716	1.41326	0.794	0.3031	0.0484972	0.150736	2.85532	1.54476
1700026F02Rik	0.565272	0	0	0	0.642386	0	0	2.76834	0	0	0	0	0	0
1700026J14Rik	0	0.535272	0	0.357125	0	2.00921	0.342101	0	0	0.364035	0.617121	0.515866	0	2.10249
1700027A15Rik	6.18866	5.46591	1.90433	0.768412	6.02822	30.8399	2.98314	23.995	0	0	0	0	0	0
1700027F06Rik	0	0	0	0	0	0	0.838803	0	0	0	0	0	0	0
1700027F09Rik	0.206412	0	0	0	0	0	0	0	0	0	0	0	0	0
1700027H10Rik	0	0	0	0	0	0	0	0	0	0	0	0	0	0
1700027I24Rik	0.992158	0.218989	0	0	0	0	0	0.308783	1.52898	2.7758	0.342405	0.149809	0	0
1700027J07Rik	0	0.114785	0	0	0	0.130079	0	0	0	0	0	0	0	0
1700028B04Rik	0	0	0	0	0	0	0.344907	0	0	0	0	0.227979	0	0
1700028D13Rik	20.3045	13.3087	18.0757	14.5886	42.6558	25.1805	17.7137	20.2981	11.2828	19.4807	2.15489	4.22043	15.0617	7.02583
1700028E10Rik	15.1325	13.6106	15.4628	19.1626	38.9216	25.5382	23.7797	36.4363	6.57187	5.19786	7.95013	10.8296	21.1375	17.9767
1700028I16Rik	4.72464	4.29564	2.38987	8.4138	0	2.31839	3.56675	11.0107	1.26353	0.268521	8.05305	6.24071	7.42807	8.10553
1700028J19Rik	2.13409	4.85024	1.88303	1.3546	1.55153	2.12543	3.60504	5.48581	0.560467	0.43043	2.51575	2.21386	1.79657	1.07475
1700028K03Rik	14.3901	19.4934	18.8982	21.9029	43.1843	37.2778	29.0752	29.8229	6.78562	5.68364	10.0776	6.95401	14.3733	13.9523
1700028M03Rik	0	0	0	0	0	1.83017	0	0	0	0	0	0	0	0
1700028P14Rik	0.520358	0.153167	0.920688	0	0.398525	4.66323	6.60551	0	0	0	0.0447672	0.0983427	0	0.567761
1700028P15Rik	6.7554	2.96208	5.16275	4.66296	33.0995	4.24857	19.7948	9.14883	0	1.06902	0.719747	0.641209	0.934994	0.559611
1700029B22Rik	2.74906	1.32769	0.87615	2.22603	0	5.03286	1.27519	5.86439	1.17632	0.446033	0	0	0	0.815982
1700029F12Rik	6.96239	5.69918	3.39091	4.19311	11.178	6.19796	8.72086	1.20531	0.15032	0.79262	0.131237	0.213281	0	0.412822
1700029H14Rik	2.22356	0.771778	1.5736	1.72691	3.81532	1.76419	1.97305	0.119485	1.07751	0.919312	0.0721728	0.0725378	0.924948	1.60905
1700029I15Rik	14.5331	23.4064	11.2745	14.1176	14.5727	2.5561	28.1248	7.32672	7.84766	15.6879	2.96312	4.76669	0	0
1700029J03Rik	0.409323	0	0.543725	0.178591	0	0	0	0	0	0	0	0	1.22436	2.25926
1700029J07Rik	11.6709	16.7955	18.2749	12.6485	26.0168	11.0435	10.7465	11.7919	4.96992	2.75259	8.32506	7.2731	30.7925	15.4194
1700029M20Rik	4.27041	3.47957	3.23584	2.04995	2.86205	3.51078	1.61134	2.1955	0.240982	0.300242	2.44827	1.9582	4.26486	4.45403
1700029N11Rik	0	0	0	0	0	0	0	0	0	0	0	0	0	0
1700029P11Rik	27.1723	26.4747	26.9212	31.5865	3.57979	13.3635	8.58665	15.2558	6.66641	1.9069	13.2646	8.63775	13.0052	14.5458
1700030A11Rik	0	0	0	0	0.19592	0	0.14273	0	0	0	0.0436904	0	0	0
1700030C10Rik	7.65236	6.68709	3.31696	8.03112	9.5189	8.9231	7.17763	14.4184	5.18152	3.99211	15.2724	14.2689	15.8268	15.9896
1700030C14Rik	0.912399	0.403598	0.201432	0.3237	1.30992	5.02438	0.960235	1.89122	2.32353	2.89366	0.0553007	0	0.139813	0
1700030F04Rik	14.2407	5.54499	8.29126	6.20991	2.71576	14.1476	0.865805	10.9372	0	0	0.725827	0	0	8.14548
1700030F18Rik	0	0	0	0	0	0	0	0	1.19304	0	0.241195	0.0909816	0	0
1700030J22Rik	11.6324	10.2692	14.9354	13.8475	17.9009	10.0316	15.6922	13.5754	8.00162	10.2771	11.932	10.9477	13.3745	14.1491
1700030K09Rik	8.62942	5.46818	3.17542	5.29278	3.59535	3.0724	3.84904	2.26491	3.96297	5.43218	10.3998	12.2618	11.3103	8.71269
1700030L20Rik	2.72787	1.84793	2.32342	3.04446	6.39276	4.65824	4.45053	6.44147	4.63728	6.38582	1.0427	1.96983	3.57339	5.31775
1700030M09Rik	0.620653	0.136443	0	0	0	0	0.131682	0	0	0	0.225791	0	0	0.438416
1700030N03Rik	2.1534	0.950957	0	0	1.33358	0	0	0	0	0	0	0	7.75176	0
1700030O20Rik	0	0.0445199	0	1.4953	1.65606	0	2.00909	0	0	0	0.0838417	0	0	0
1700031A10Rik	0	0.737819	0	0	1.94504	0.551024	0	0	0	0	0	0.238365	0	0.876809
1700031F05Rik	0	0	0	0.0811944	0	0	0	0.229201	0.457691	0	3.78677	1.26826	0	0
1700031L13Rik	0	0.16944	0	0	0	0	0.161599	0	0	0	0	0	0	0
1700031M16Rik	0.779806	0.172158	0.343667	0.828812	0.445703	4.2348	0.328036	1.9104	0	0	0	0	1.18526	0
1700031P21Rik	0	0	0	0	0	0	3.33721	0	0	0	0	0	0	0
1700034E13Rik	2.49867	0	1.31813	0	0	3.9845	0	0.611843	0	0	0	0	0	0
1700034G24Rik	0	0.353642	0.118366	0	0.931959	1.61841	0.113119	0.626073	0	0	0.0337579	0	0	1.2934
1700034H15Rik	11.8416	9.88121	9.94516	10.2282	24.9347	15.8945	15.0083	20.9939	6.58319	8.1806	2.61491	4.21776	9.53124	6.73385
1700034I23Rik	2.00932	0.547625	0.815811	0.39377	1.05733	0.865519	0.792256	1.70799	0	0	0.102629	0.0715238	0	0.858685
1700034J05Rik	2.2602	2.34919	3.12637	3.64123	12.5553	1.676	6.51799	2.90028	0.341953	0.630274	0	0.033879	2.48228	1.90075
1700034K08Rik	0.304153	1.0787	0	0.540302	2.1406	1.2206	0	0	0.762314	0	0	0.383795	3.87065	0
1700034P13Rik	12.0535	10.9482	5.83272	7.62704	3.98897	10.3255	10.925	3.89824	0.982734	0.679996	1.84966	4.90964	14.3098	8.84825
1700036G14Rik	0	0	0	0	0.979638	0	0	0.527715	0	0	0	0	0	0
1700037C18Rik	0.793305	2.1113	0.858626	1.48395	0.151629	0.133498	1.80403	0.163645	0.832318	0.761109	1.58381	2.3027	4.13126	3.27734
1700037H04Rik	66.4924	73.5306	101.551	88.6523	43.8005	43.4997	40.5151	46.2933	78.6838	61.8438	158.015	145.282	79.4427	88.2483
1700039E22Rik	0	0	0	0	0	0	0	0	0	0	0.0505424	0.110643	0	0
1700039M10Rik	0.443969	0	0.390347	0	0	0.442485	0.374514	0	0	2.71572	0.989251	0.618871	8.15601	1.69157
1700040D17Rik	6.61074	4.93555	5.32845	5.22188	5.25606	3.4343	5.90753	7.24025	1.77785	2.49538	6.0349	5.15844	1.65711	3.36833
1700041A01Rik	0	0	0	3.16162	0	0	1.47952	0	0	0	0	0	0	0
1700041C23Rik	0	0.838066	0	1.64945	0	0	5.60308	0	0	0	0	0	0	0
1700041M19Rik	0.355767	0	0	0	0.688575	0	0.300899	0	0	0	0	0	0	0
1700042G07Rik	0	0	0	0	0	0.859129	0.727154	0	0	0	0	0	0	0
1700042G15Rik	0.525146	0.897545	1.16157	0.554759	0.344842	0.354269	0.406125	0.218169	0.146301	0	0.0305548	0.0340944	0.618416	0.183304
1700042O10Rik	0.385778	0.339761	2.0481	1.12972	0	0	0	0	0.162044	1.74899	0.169806	0.228686	3.65997	3.4021
1700044C05Rik	0	0	0	0	0.196412	0	0.144862	0	0	0	0	0	0	0
1700044K03Rik	0	0	0	0.986639	0	0	0	1.38984	0	0	0	0	0	0
1700045H11Rik	0	0	0	0	0	0	0	0	0	0	0.261333	0.0951159	0	0
1700046C09Rik	0	0	0	0	0	0	0	0	0	0	0	0	0	0
1700047A11Rik	5.47228	2.77626	5.66552	4.46685	5.13651	5.38634	4.45912	8.3872	1.13788	0	0.0823447	0.263939	0	0
1700047E10Rik	21.2557	49.8262	31.509	20.4104	19.0513	39.5475	39.6549	23.8021	16.5766	27.0388	82.3896	28.3834	10.4265	2.40185
1700047G03Rik	0.379668	1.00176	1.66924	0	1.53236	0.762915	1.28787	1.64336	0.231381	1.06307	0.0482039	0	0	0
1700047I17Rik2	12.211	15.7712	18.0592	12.3611	13.6431	20.5453	18.6983	16.4262	42.3691	39.1099	37.7371	28.8134	22.6646	22.3233
1700047L14Rik	35.4393	28.3396	39.1593	35.3809	71.2959	52.0268	37.167	62.7394	5.65236	2.92946	0.829974	1.06813	14.7907	3.67808
1700047M11Rik	1.57762	0.690176	0.464792	0	0.30234	0	3.32553	1.61202	0.666981	0	0.382982	0.214569	3.12659	0
1700048M11Rik	0	0.496541	0	0.977272	1.27778	0	0	0	0	0	0.417564	1.25389	0	0
1700048O20Rik	28.8942	28.195	25.9624	27.9483	53.1199	39.3965	32.8825	43.4833	11.2442	10.3839	27.0691	23.3961	19.2906	12.2358
1700049E15Rik	0.157896	1.25606	0.558926	0.546415	0	0	0.403952	0.193696	0	0.289859	0	0	0	0.556179
1700049E17Rik1	2.71967	11.5285	10.8612	1.7338	5.61793	7.33838	9.58842	3.95466	2.37611	2.1682	23.8357	19.8529	30.8859	21.8908
1700049E17Rik2	2.71967	11.5285	10.8612	1.7338	5.61793	7.33838	9.58842	3.95466	2.37611	2.1682	23.8357	19.8529	30.8859	21.8908
1700049E22Rik	0	0	0	0	0	0	0.839054	0	0	0	0.246256	0.554603	3.08606	0
1700049L16Rik	3.19813	0.894248	0	1.0363	0.9169	0	1.19648	0.277281	0	0	0	0	0	0
1700051A21Rik	1.5768	1.92349	1.24801	2.69486	1.60463	1.74346	4.04643	0.932343	9.48645	8.97024	0.100294	0.331854	1.72211	1.62514
1700052I22Rik	1.31898	4.65977	0	0	0	0	0	0	0	0	0	0	0	0
1700052K11Rik	4.8431	4.22087	2.69976	4.16298	3.67924	3.55934	3.51299	4.13337	3.94604	4.03485	5.82175	5.73503	5.88997	7.86512
1700054A03Rik	0	0	0	0	0	0	0.175003	0	0	0	0	0	0	0
1700054K19Rik	0.626938	0	0	0.544903	0	0	2.11543	0	0	0	0	0	0	0
1700054M17Rik	0	0	0	0	0	0	0.597682	0	0	0	0	0	0	0
1700055C04Rik	0	0	0	0	0	1.77044	0	0	0	0	0	0	0	0
1700055D16Rik	3.89189	3.46214	2.80775	2.31957	4.69849	2.36945	3.69924	4.81806	3.96656	5.19294	1.47901	1.85709	3.23197	2.36164
1700056E22Rik	2.25888	1.57891	4.70334	1.36973	0	1.96324	1.09772	0.804682	1.67273	2.86923	0.637928	0.858334	3.80689	3.01704
1700057G04Rik	0.38627	0	0.113857	0.568327	0	0	1.09246	0.785592	0	0.480369	1.3731	0.288458	0	0.54869
1700057H15Rik	0.146566	0.515446	0	0.255253	0.849236	0	0	0	0.37183	0	0.0374159	0.129115	0	0
1700057H21Rik	0	1.3241	0.439376	0	1.70372	1.49419	0.421554	0	0	0	0.123723	0.278642	0	0
1700060C16Rik	0	0	0	0.255005	0	0	0	0	0	0	0	0.0826217	0	0
1700060C20Rik	0	0.303677	0.605941	0	0	0	1.16025	0	0.857793	0	0	0.186485	0	0
1700061F12Rik	0	0	0	0	0	0	0	0	0	0	0	0	0	0
1700061G19Rik	1.9773	0.691812	1.21815	1.81031	2.56541	1.00871	2.92603	0.841837	3.14963	3.5909	0.716224	0.875389	0.476059	0.591123
1700061I17Rik	0	0	0.0521007	0.0515116	0	0.0590186	0	0	0	0	0	0	0	0
1700061J23Rik	0	0.38388	0	0	0	0.433189	0	0	0.569986	0	0	0	0	0
1700061N14Rik	2.58611	0	0.568443	0	0	0	0	0	0.847854	1.31826	0	0	0	0
1700063A18Rik	0	0	0	0	0	0	0	0	0	0	0	0	0	0
1700063D05Rik	42.1624	33.305	40.4527	42.5518	91.3547	40.4138	39.8593	85.2536	40.7558	53.2583	3.90185	4.8647	16.4089	21.9743
1700063H04Rik	0.391225	1.03488	0.859384	0.34251	0	0	0.497696	0	0.24025	0	0.0969971	0.110453	0	0
1700063O14Rik	1.60795	1.89355	2.35624	0.9317	4.26371	0	3.16494	3.93735	0	0	0.265395	0.597708	0	0
1700064J06Rik	0	0	6.25897	2.06243	10.7865	0	0	8.71578	3.11183	0	0	0	0	0
1700064M15Rik	0	0.264462	0	0	1.03976	0	0.509069	0	1.3243	0	1.94112	1.38188	0	2.20684
1700065D16Rik	3.9206	7.4871	8.74516	11.0743	12.8427	7.49811	9.00007	7.90693	0.616621	0	1.93361	4.87504	11.5923	4.86912
1700065I16Rik	0.201762	0	1.64734	0.343127	0.433113	0	0.31992	0	0	0	0.153715	0.110898	0	0.594199
1700065J11Rik	0	0	0	0	0	0.787011	0	0	0	0	0	0	0	0
1700065J18Rik	0	0	0	0	0	0	0	2.41177	0	0	0.243846	0.549177	0	0
1700065L07Rik	0	0	0	0.773312	5.44954	0	0	0	0	0	0	0	0	0
1700065O20Rik	0	0	0	0	0	0	0	0	0	0	0	0	0	0
1700066B17Rik	0	0	0	0	0	0	0	2.72956	0	0	0	0	0	0
1700066B19Rik	0.414591	1.18109	1.2216	0.885596	0.479544	2.40437	0.742914	1.92091	0.287272	0.0882891	0.465093	0.44595	0.453914	0.275582
1700066C05Rik	138.694	99.1737	104.655	152.389	273.029	161.356	161.969	317.014	81.8869	104.22	15.1802	63.6254	6.85597	44.5622
1700066J03Rik	3.14832	5.56126	8.3042	7.03637	8.17785	2.68954	4.93218	8.25988	1.17962	1.8341	1.00215	4.51399	13.7903	12.0109
1700066M21Rik	7.14951	8.15308	8.17015	8.7457	10.731	11.7856	8.31902	15.4768	11.5956	10.7734	39.3314	38.3951	24.7081	20.5628
1700066N21Rik	0	1.08808	0	0	0	1.42376	0	0	0	0	0	0	1.50991	0
1700066O22Rik	1.08455	0.680989	0	0.135403	0	0	0	0	0	0.274919	0	0.0881792	0	0.534556
1700067G17Rik	0.997101	0.586838	4.68564	1.76128	1.53031	0	0	0.405131	0	0	0.421228	0.2846	0	0
1700067K01Rik	5.93494	4.71304	5.85017	2.6875	2.81481	0.256612	5.30255	3.12219	5.67424	9.84628	9.55622	11.7684	4.66056	3.66571
1700067P10Rik	1.4208	3.20504	0.716112	0	0	0.203392	6.2006	0	0	0	0	0	0	0
1700069L16Rik	2.21652	2.18338	3.50089	1.46033	0.280665	0	0	0	0	0.458683	0.126834	0	3.14563	4.58632
1700069P05Rik	0	0	0	0	0.478839	0	0	0.254126	0	0	0	0	0	0
1700071K01Rik	0.540974	0.238021	0	0.118373	0	0	0	0.165679	0	0	0.278814	0	0	0
1700071M16Rik	2.74838	4.82577	5.93249	3.03834	8.19235	5.25155	5.52305	3.17108	0	0.0930311	0.0913181	0.201571	6.02283	4.27081
1700072B07Rik	0	0	0	0	0	0	0	0	0	0	0	0	0	0
1700072I22Rik	31.2353	21.7572	30.873	29.9063	64.911	37.7909	29.2384	55.0373	27.5904	31.6775	0.798263	5.85725	0.958511	3.47741
1700072O05Rik	0	0	0	0	0.311882	0	0	0.976552	0	0	0	0	0	0
1700073E17Rik	0.48948	0.225486	0.308253	0.222855	0.940966	0.41633	0.433279	0.199202	0.1985	0.131187	0.0304546	0.244531	0.414028	0.463143
1700074H08Rik	0	0	0	0	0.474019	0	0	0	1.094	0.850488	0	0.116288	0	1.57979
1700074P13Rik	0.90554	1.05943	0.399712	0.849375	3.7593	2.38318	1.69514	0.276413	0	0	0	0	0	0
1700080E11Rik	0.879168	0	0.935013	0	0	0	0	4.75557	0	0	0	0	0.974918	0
1700080N15Rik	0	0	0	0	0	0	0	0	0	0	0	0	0	0
1700080O16Rik	1.71796	1.43511	1.13741	1.74108	4.58426	0.772407	0.942927	0.419216	0	1.95123	4.2086	2.79413	12.3035	6.79744
1700081H04Rik	0	0.104835	0.52593	0	0	0	0	0	0	0	0.0609872	0	0	0
1700083H02Rik	0	0	0	0	0	0	0.502716	0	0	0	0	0	0	0
1700084D21Rik	25.8611	15.628	13.164	17.7452	65.7389	17.6354	36.1676	32.4961	21.4195	30.5281	2.52736	6.45092	8.85139	13.6874
1700084E18Rik	21.0973	15.628	23.9345	21.8858	3.0936	4.0697	10.9077	15.8314	1.78495	12.4888	10.6149	5.31252	13.2771	8.21244
1700084F23Rik	1.3601	0.119327	0.119139	0	1.69979	0.534796	0.228992	5.47775	0	0	0	0	0	0
1700084J12Rik	0	0	0.408212	0	0.26859	0.23333	0	0	0	0	1.44096	0.716346	3.66702	4.81206
1700084M14Rik	4.41774	1.64323	0.481392	0	5.13063	1.48344	5.01023	3.73801	0	0	1.64825	0.548886	5.37099	2.62154
1700085C21Rik	0	0	0	0	0.295873	0	0.219355	0	0	0.967681	0	0	0	0
1700086L19Rik	0.769616	0	0	0.483388	1.54598	1.92474	5.18453	0	0.714585	1.24237	1.50132	1.07084	2.46285	1.44877
1700086O06Rik	3.89408	4.52292	2.9151	3.6763	4.87125	13.1124	5.16778	9.2343	2.78596	1.19147	5.17033	5.07329	1.85988	1.99114
1700088E04Rik	3.21518	7.26163	9.33285	11.6034	1.27717	1.4553	1.83404	2.1626	2.28359	0.487067	3.02711	3.07926	0	1.01641
1700091H14Rik	13.7614	13.3235	11.8389	16.1888	38.7963	15.4975	17.61	25.1053	2.12148	1.32199	2.35231	2.43883	18.5134	11.7291
1700092C02Rik	2.84559	0	0	0	0	0	0	0	0	0	0	0	0	0
1700092C10Rik	0	0	0	0	0	0	0.323192	0	0	0	0.0948542	0.640875	0	1.44021
1700092E19Rik	0.0739529	0	0	0.0645756	0	0	0	0	0	0	0	0	0	0
1700092K14Rik	0	0	0	1.87163	0	0	0	0	0	2.19536	0	0.300174	0	0
1700092M07Rik	0	5.61698	5.59161	4.42204	1.44546	19.0154	5.36479	6.22916	5.00405	2.59346	2.51924	2.83684	0	0
1700093K21Rik	0.841856	1.36281	0.248441	1.44368	4.04128	1.25585	5.65426	0	1.25051	1.33673	1.94484	1.36696	0	1.35409
1700094D03Rik	8.89656	6.56873	7.75185	9.26865	15.9195	9.57647	12.4589	15.769	7.98619	9.67539	10.6756	6.86029	11.35	12.1019
1700094J05Rik	0.49499	0.1391	0.870277	1.94224	1.83512	0.493275	1.03648	2.3907	1.6291	0	0.0969645	0.0914363	0	1.30203
1700094M24Rik	1.82221	0	0	0.223121	0	0	1.32057	0.314854	0	0	0	0	0	0
1700095A21Rik	24.663	15.2595	17.6016	21.261	56.852	38.159	30.0083	48.9438	1.5473	2.18874	1.95294	3.70401	8.08296	16.1847
1700095B10Rik	0	0	0	0	2.44437	0	1.12565	0	0	0	0	0	0	0
1700095J03Rik	2.15522	1.17458	0.764061	0.568349	0.0768146	0.597095	1.0654	1.46978	0.774913	0.260325	0.350257	0.456174	1.62049	2.51939
1700095J12Rik	3.94284	1.8298	1.01959	4.03462	6.66259	2.33878	6.68491	14.0196	0	4.41195	0.0542937	0	1.45179	0.845088
1700096J18Rik	0	1.76832	1.17356	1.74017	1.51686	0	1.12595	0	0	0	0.826149	0.18606	0	0
1700096K18Rik	2.44829	0.640965	1.17353	1.83543	1.26908	3.6283	2.13895	0.546806	1.91552	4.61655	1.73822	2.06483	3.5	1.07392
1700096P03Rik	0	0	0	0	0	0	0	0	0	0	0	0	0	0
1700097N02Rik	9.35785	7.1538	6.4574	12.9813	23.8395	5.61247	13.6208	25.862	2.02122	0.710864	1.79001	1.91633	1.89088	4.0214
1700099I09Rik	0.387514	0	2.608	0	4.40577	3.108	0.451311	0.327144	0.724569	1.77662	0.0737166	0	1.31168	1.251
1700100I10Rik	7.78212	8.538	3.85142	8.59901	16.1371	10.6902	17.1342	9.61204	6.43938	7.81682	3.19901	2.88013	9.93427	9.23993
1700100L14Rik	2.64677	0	3.49361	0.229759	0	0	0	0	0.331806	0	0	0	0	1.00258
1700101I11Rik	0.583717	1.03062	0	0	0	0	0	0	0.727755	0	0.998448	1.30205	1.04647	1.24765
1700101O22Rik	0	0	0	1.97378	5.16147	4.52669	0	0	0	0	0.562232	0	0	0
1700102H20Rik	0	2.66018	1.76544	2.04338	0.890581	0.390527	7.62222	0	3.59696	0	2.23707	2.07557	7.10465	0
1700102P08Rik	2.14417	4.65076	2.22298	5.53335	3.78897	2.14729	2.45071	7.43104	0.297655	3.79818	3.03429	2.33076	3.66366	4.8877
1700104L18Rik	0	0	0	0	1.52584	0	0.279157	0	0	0	0	0	0	0
1700105P06Rik	4.23008	0	1.69054	0	0	0	0.648785	0	4.5387	1.56819	2.57058	3.00187	9.28327	4.33804
1700108F19Rik	0	0.912259	0.152337	0.454344	0.598835	0	1.02624	0	6.34635	7.32972	0.226001	0.250966	0.979804	0
1700108J01Rik	0	4.49329	0	1.96523	1.28477	1.12676	2.3842	0	0	1.15257	0	0	7.1365	6.64098
1700109G14Rik	0	0	0.172961	0	0	0	0.165994	0.237659	0.511074	0.389899	0	0.172058	0	0
1700109G15Rik	0	3.216	1.06716	0	2.75866	0	6.14324	0	0	0	0	0	0	0
1700109H08Rik	3.32974	3.76644	2.30092	7.48515	7.52192	2.6919	10.5996	8.84999	2.41618	1.91121	4.89673	5.98564	6.21176	10.7609
1700109I08Rik	0	0	0	0	0	0	0	0	0	0	0	0	0	0
1700109K24Rik	2.84583	3.37934	3.61777	2.61786	14.7936	12.7283	6.98916	7.77641	2.37444	1.58845	1.73643	3.46795	12.2832	5.14018
1700110C19Rik	1.87133	1.84827	2.66317	1.58589	0.53497	0.23175	9.80583	0.85763	0.58241	0	0.365897	0.861933	0	0
1700110I01Rik	0.511634	0.687066	0.725724	0.993232	1.9126	0.957478	0.895517	1.6008	2.15973	3.94975	0.101344	0.17772	4.0492	2.49017
1700110I07Rik	11.1102	14.4616	13.0762	14.0943	27.2649	12.4882	23.517	17.7075	1.94447	1.71366	2.39537	4.18289	14.3457	8.52121
1700110K17Rik	1.28081	1.13454	0.69215	0.459928	1.88002	0.523814	0.638819	0.306958	5.80313	8.89719	0	0.0678644	0	0
1700111N16Rik	1.72297	0.805817	1.21754	1.20688	2.14125	0.677748	2.23102	3.05004	0.292756	0.222508	0	0.28575	0.757561	0
1700112H15Rik	11.3553	7.15451	5.57311	6.86339	19.2556	14.6991	13.6468	11.6367	2.02318	1.90237	11.7447	12.7478	20.1376	15.7121
1700112J05Rik	1.18669	0.184204	1.39712	0.697633	0.692272	0	1.84582	0.7308	2.03001	2.01061	0.051747	0.116425	0	0
1700112J16Rik	4.56251	3.48639	4.45261	7.48227	8.62274	6.63068	13.3028	14.752	12.3681	13.842	1.66702	0.861303	23.0616	9.09084
1700113A16Rik	9.26801	10.8294	4.76751	7.29354	13.0729	11.1678	4.23494	8.14353	5.92684	11.618	10.3293	9.90284	7.91364	7.8678
1700113B09Rik	0.713411	0	0	0	5.67514	0	0	0	0	0	0.35325	0	0	0
1700113H08Rik	2.09765	2.19237	0.591413	0.164747	2.4202	0.190248	1.37416	0.467767	3.77749	2.97852	0.563579	0.779234	0	1.15754
1700116B05Rik	0	0	0	0	0	0	1.55808	0	0	0	0	0	0	0
1700119H24Rik	0	0.95502	0	2.1929	2.45762	0	0	0	1.2831	1.31903	0	0	0	0
1700120C14Rik	2.32058	4.09912	4.08059	8.06771	0	4.62564	5.87262	11.3647	1.5216	0	3.7344	6.79301	0	0
1700120E14Rik	0.183207	0	0.484223	0	0	0	0.206106	0	0.0725639	0	0	0	0.336979	0.199659
1700120G07Rik	2.03273	2.57638	1.34048	3.30902	4.65951	4.90916	1.85201	3.53009	1.44989	1.58061	0.808556	1.90752	1.12197	0
1700120K04Rik	0.423954	0	0.745499	2.21087	3.37253	0.422538	2.86104	2.07626	1.11194	0	5.14311	4.49138	0	1.60813
1700121L16Rik	2.76379	4.18459	9.02566	5.83379	13.4607	8.65717	7.66038	11.6017	0	0	0.391001	3.96267	0	0
1700121N20Rik	0.137307	0	0	0	0	0	2.22329	1.1904	0	0	0.0698052	0	0	0
1700122C19Rik	0.607078	0	0	0	0	0	0	0	0	0	0	0	0	0
1700122H20Rik	0	0	0	0	0	0.845052	0	0	1.11191	0	0	0	0	0
1700122O11Rik	0	0	0.192262	0	0	0	0	0	0	0	0	0	0	0
1700123J17Rik	0.443204	0.19348	0.288848	0.128603	0	0.388254	0	0	0	0	0	0	0	0
1700123K08Rik	0	0.472579	0.11836	0	0	0	1.01667	0	0	0	0	0.151527	0	0
1700123L14Rik	0.936165	0.442451	1.20094	0.188656	1.07058	2.29016	2.06557	0.47995	0	0	0	0.100127	0.777884	0
1700123M08Rik	1.7182	1.16493	3.39357	1.63904	2.7575	0.668872	3.59898	1.62856	1.51386	2.06122	3.43103	3.5763	7.092	4.2382
1700123O12Rik	0.292436	0	0	2.2605	1.31104	1.91634	0	0	0.45155	0	0.0952068	0.409411	0	0
1700123O20Rik	20.6421	19.3112	17.2725	16.8576	29.676	20.495	20.0285	22.4408	20.1176	18.0879	32.0845	37.6158	38.996	31.1134
1700123O21Rik	0	0	0	0	0	0	0	1.58301	0	0	0	0	0	0
1700124L16Rik	2.03502	0	0	0	20.8138	10.1411	6.86665	12.4578	0	4.14936	2.51914	2.83673	0	19.7072
1700125G02Rik	0	0	0	0	0	0	0	0	0	0	0	0	0	0
1700125G22Rik	1.76543	0.773435	2.32983	1.24477	9.64813	4.04403	4.50598	6.63477	1.10378	2.7163	0.960342	0.393838	3.41726	0.51166
1700125H03Rik	0	0	0	0.488636	0	0	0	0	1.47453	1.1463	0	0	0	0
1700125H20Rik	0.605861	1.73248	2.52603	0.930677	0	0	0	0	0.572471	3.46307	1.80499	1.80407	7.99001	3.42255
1700126H18Rik	0	0	0	0	0	0	0	0	0	0	0	0	0	0
1700128A07Rik	0	0.155474	0	0	0	0	0	0.433134	0	0	0.048781	0	0	0
1700128F08Rik	39.1428	32.9325	36.4675	45.4833	88.9352	61.1465	45.1319	103.918	26.2579	31.5187	3.05466	6.74091	19.1596	12.4764
1700129C05Rik	0.645926	0.340942	0.568688	0.444944	1.33828	0.254587	1.3066	1.2515	0	0	0	0	0	0
1810006J02Rik	0	0	0	0.0597724	0	0	0	0	0.252994	0	0	0	0	0
1810007C17Rik	0	0	0	0	0	0	0	0	0	0	0	0	0	0
1810007D17Rik	1.10863	0.193416	2.14399	0.390083	2.83084	2.85156	2.83149	2.95529	0	1.24788	0.348627	0.321928	2.57888	0.762811
1810008I18Rik	0	0	0	0.225687	0	0	0	0	0	0	0	0	1.50057	0
1810009A15Rik	33.7888	40.2857	26.0609	21.5853	15.0637	23.7218	26.8134	23.6421	36.1747	27.7793	115.522	90.9914	69.2204	70.6583
1810009J06Rik	0	0	0	0	0	0	0	0	0	0	0	0	0	0
1810010D01Rik	0.330079	0	0	0.14534	0	0	0.281417	0.204721	0	0	0.482638	0.256279	0	1.13168
1810010H24Rik	1.3884	2.32531	1.66874	0.666119	2.33597	1.89931	2.66843	12.0293	1.7427	0.240694	3.05703	3.37061	2.07863	2.8984
1810012K16Rik	0.425698	0.751963	0.748567	2.95997	5.32149	0.424276	3.59101	9.3816	0	0.867988	0.526968	1.06813	0	0
1810013A23Rik	0	3.87116	1.54147	4.57144	0	0	0	2.14653	0	0	0.217029	0.24439	6.0044	3.69445
1810013L24Rik	46.0079	42.5695	46.4899	44.5062	69.2569	57.6496	51.265	69.3226	72.0608	76.9323	52.2163	51.1245	58.5834	52.2109
1810014B01Rik	10.1789	8.17724	10.0853	10.2149	17.5671	6.02058	10.8246	13.5793	7.39157	9.54445	10.1712	9.97051	9.20982	13.9731
1810018F18Rik	0.429371	0.900924	1.28085	0.676369	1.40131	1.28097	0.800146	1.89457	0.205736	0.948317	0.116844	0.208741	0	0.872
1810019D21Rik	1.38769	0.326719	0.656196	0.348654	0	0.275964	1.015	0.673054	4.33156	6.85791	1.34503	0.95839	0.971727	1.49883
1810020O05Rik	4.04335	2.75173	6.31385	6.18389	16.5734	15.7864	15.823	10.881	0.983523	1.74	1.86482	1.3928	0.621225	0.783203
1810021B22Rik	0	1.72156	0	0	0	0	0.468282	0.341988	0.718699	3.29351	0.279004	0.459294	1.42537	0.888343
1810022K09Rik	121.119	111.754	121.325	133.646	126.834	295.077	145.971	121.437	123.532	130.678	429.92	305.597	331.494	387.646
1810024B03Rik	2.14518	1.52511	1.63193	3.14641	7.00153	1.21991	1.64772	3.39208	1.19389	0.918992	1.59026	2.33628	1.97635	1.58335
1810026B05Rik	2.70195	2.55324	2.86866	3.02507	8.01959	5.31553	5.12125	6.54731	3.33512	3.73706	6.15395	6.23716	6.92702	7.10779
1810030O07Rik	45.5964	31.5847	36.8391	39.206	75.1137	61.9255	54.3031	76.7173	45.6387	39.1204	28.2564	31.8998	56.7437	53.61
1810032O08Rik	30.0274	18.4811	26.6779	24.8953	23.8351	50.7767	42.2213	35.8652	5.59936	11.2793	49.2622	30.1022	28.9245	25.3877
1810034E14Rik	3.45503	4.70937	5.23911	4.28383	5.91158	3.58679	8.71404	10.1573	7.18438	5.67292	0.831627	1.62	3.41526	2.4591
1810037I17Rik	77.6471	73.5275	66.844	63.4365	113.484	103.715	126.237	99.3884	39.898	54.4943	148.133	111.948	94.1321	88.8629
1810041H14Rik	14.9822	10.7	8.29037	6.11035	1.75144	4.49631	7.893	8.74886	0	0	3.06435	3.38966	6.0676	0
1810043G02Rik	2.63853	2.64428	4.19845	3.66474	3.62175	1.67411	3.28765	6.6388	2.88466	2.70154	3.22882	6.4045	3.46354	4.47438
1810044D09Rik	4.63185	9.09091	3.16744	7.60425	12.282	3.59052	9.98517	6.93117	2.69964	9.44421	23.9542	15.7827	22.452	25.8998
1810046K07Rik	0	0.0878583	2.02592	0	0.229087	0.197792	2.69723	1.57554	0.117654	0.360257	0.0997612	0.0564097	0	0.279272
1810053B23Rik	0.61125	0	1.05757	0.522729	0.683469	0	0.507335	0.736346	0.250123	0.378662	0.0795933	0.143322	3.83168	3.34831
1810055G02Rik	79.8358	58.0204	77.2095	80.2698	79.4356	68.3586	52.0867	85.8898	96.1869	103.816	57.5906	54.7668	44.9795	49.9349
1810058I24Rik	37.2884	35.0617	34.4904	28.7283	17.6253	37.5008	35.4017	38.3687	45.6644	36.1758	71.5896	97.5816	64.7091	68.026
1810062G17Rik	0	0.289425	0	0	0	0	0	0	1.25981	0.964035	0.0410842	0.460256	1.85558	0
1810062O18Rik	3.15432	4.08068	3.89382	2.84354	8.28259	8.07948	6.08239	7.35629	4.43371	4.62967	3.02845	3.10365	7.55044	5.82411
1810063I02Rik	0	0	0	0	0	0	15.2257	36.8308	0	0	0	1.67732	0	0
1810064F22Rik	7.12648	4.40572	5.81134	3.83879	14.8692	7.66872	8.89173	7.86508	1.91571	2.51949	0.899699	2.85286	4.20591	2.64597
1810065E05Rik	0	0.274094	0.414038	0	0	0	0	0	0	0	0.0418915	0	0	0
2010001A14Rik	28.9063	16.6919	24.9886	24.0866	46.6512	27.289	21.5348	42.9493	9.89932	19.7867	2.09772	7.30356	6.77822	4.53063
2010003K11Rik	0.118457	0	0.941557	0	0.136387	0	0.100709	0	2.66169	0.681323	0.518276	0.872975	2.79592	1.40817
2010005H15Rik	67.3068	23.1402	36.5392	28.2684	88.2958	48.1729	57.9204	51.9879	1.77716	2.76316	2.68408	8.6896	8.31437	8.62048
2010009K17Rik	1.90857	0.67427	0	0.663536	1.30137	0	1.93199	0	0.500578	0	0.202489	0.319256	0	1.43445
2010010A06Rik	0	0.227693	0	0	0	0	0.217074	0	0.318192	0.481974	0	0.409664	2.12131	1.08499
2010016I18Rik	1.83429	0.444447	0.0736453	0.725021	0	4.52746	1.34069	0.512584	0.105888	0.193559	0.118483	0.0433018	0	0.743102
2010106C02Rik	0	0	0	0	0	0	0	0	0	0	0	0	0	0
2010106E10Rik	0	0.0879749	0	0	0	0	0	0	0	0	0.0853116	0.0318571	0	0
2010109A12Rik	0	1.10077	3.28738	1.08325	2.36057	0	2.10269	3.05184	0	0	1.54281	2.2006	2.5262	3.14571
2010109I03Rik	4.2617	2.98182	3.62768	3.71899	8.36748	5.6106	4.61419	6.3016	3.21339	5.67141	0.794054	2.66153	4.96016	4.4259
2010111I01Rik	14.2577	11.8003	14.7336	13.2718	13.5374	16.7922	16.2773	14.7438	4.75079	8.89212	7.24711	9.39549	19.1304	25.6811
2010204K13Rik	7.93957	4.98917	8.52663	6.65783	11.4291	14.206	29.1063	16.1696	20.7059	38.083	5.97074	15.176	4.30883	1.34312
2010300C02Rik	11.6612	8.84688	11.8376	11.6062	4.16496	6.6955	4.65303	9.4722	1.12977	1.03206	8.56084	7.44497	36.7062	40.0125
2010308F09Rik	0	4.42082	0.560713	0	0	0	0	0	0	0	0	0.0921403	0	0
2010310C07Rik	0.182352	0	0	0	0	0	0	0	1.67486	4.58922	0.199745	0	0	0
2010315B03Rik	2.56911	2.07726	1.49531	2.58634	5.19752	4.08146	3.24628	3.35901	5.20171	5.67784	5.35975	6.82744	9.4673	6.59391
2010320M18Rik	9.5337	9.69946	5.69429	13.417	5.45574	19.8162	3.02406	6.30593	2.67775	8.29995	23.5686	23.8245	32.8582	27.6129
2200002D01Rik	0.927755	0.409702	2.03926	0.806359	7.9074	4.16094	0	2.75119	1.05991	0	0.808251	2.45717	0	3.55063
2200002J24Rik	0	0	0	0	0	0	0	1.55124	0.408195	1.84505	0.163601	4.04651	0	0
2210010C04Rik	3.40788	4.71589	1.66732	3.54688	4.9429	4.19762	2.65486	3.30258	0.654882	0.40397	0.481893	0.476579	2.14536	2.14554
2210011C24Rik	0.683408	1.06968	0.15148	0.148992	0	3.00119	0.291713	0	0.271154	1.19526	1.76665	2.92185	1.83708	0.560398
2210016F16Rik	25.1166	22.9292	22.1145	26.5801	19.8874	21.9527	23.0905	29.391	27.9434	27.6353	45.8411	49.4184	27.3012	27.0429
2210016L21Rik	37.3015	25.0013	27.7781	31.0374	33.8296	40.0561	29.2472	20.806	16.4479	22.8078	34.2828	29.7439	35.2169	28.5338
2210039B01Rik	11.0872	12.6384	14.1368	13.5282	37.9026	13.8358	22.1771	22.6811	6.49729	9.89854	5.92174	9.95494	36.9893	37.6063
2210404E10Rik	2.76775	0	1.8251	1.2028	1.1795	0	0.291845	0	0	0	0.171308	0.0964528	0	0
2210406O10Rik	3.50762	4.3188	7.12479	2.5198	2.12585	7.08552	2.69248	3.89415	7.71919	3.1845	4.63109	4.93545	2.71768	1.35635
2210407C18Rik	0	0	0	0.300723	0	0.169562	0	0	0	0	0	0.10342	0	0.640352
2210408F21Rik	2.32601	3.38697	1.59483	5.96845	8.92212	4.37285	4.67357	6.03977	1.49541	1.78226	4.82308	3.85364	6.20565	13.2883
2210408I21Rik	2.91494	1.75692	3.95089	1.66797	3.11141	3.50748	3.31136	3.44998	5.17707	4.14709	4.95481	5.16866	8.83019	8.8755
2210409D07Rik	0	0	0	0	0	0	0	0	0	0	0	0	0	0
2210409E12Rik	0	1.09623	0	1.1464	1.49893	1.31457	1.11265	6.97956	11.3418	2.68938	1.63276	1.31095	0	0
2210414B05Rik	0	0	0	0	0	0	0	0	0	0	0	0	0	0
2210416O15Rik	0.180936	0	0.0802973	0	0	0.375015	0	0	0	0	0.343184	0.345196	0	0.292434
2210417A02Rik	21.8429	3.63999	3.98589	5.37305	11.7088	15.1978	2.78125	21.6972	6.48558	5.04193	0.816274	0.689387	0	1.55918
2210418O10Rik	12.0883	9.51039	10.5374	12.2931	27.7292	18.3112	13.5633	20.8914	12.8965	16.7112	6.67066	10.0938	17.929	17.1549
2210420H20Rik	0.62466	4.068	4.39218	3.14593	2.88408	4.04102	4.06486	5.06617	3.12928	2.94776	0.308111	0.789197	3.74376	1.16812
2300002M23Rik	0	0	0	0	0	0	0	0	0	0	0.0256939	0	0	0
2300003K06Rik	0	0	0	0	0	0	0	0	0	0	0	0	0	0
2300009A05Rik	8.26236	7.58931	8.42675	6.89398	6.38487	11.1992	12.5456	4.85565	20.3702	14.1512	16.9862	18.9806	17.7182	17.1937
2310001H17Rik	1.4673	0	0	0	0	0	0.802196	0	0	0.422964	0	0.511336	0	0
2310001K24Rik	0	0	0.568443	1.12386	0	0	0.545385	0	0	0	0.160066	0	0	0
2310002D06Rik	0	0.437146	0	0	0.562472	8.38605	0.83504	0	0.649075	1.00919	0	0.55195	0	0
2310002F09Rik	0.606439	0.0380078	0.307396	0.037286	1.61765	0.0941479	0.477961	0.264313	0.106018	0.322538	0.107451	0.0269967	0.275157	1.13712
2310002L09Rik	0	0	0	0	0	0	0	0	0	0	0	0	0	0
2310003N18Rik	1.30119	1.72384	1.14403	2.26186	4.4361	1.94526	0	2.38965	0.853187	2.65309	0	0	4.19794	0
2310005A03Rik	6.29294	5.0937	5.22407	5.15886	14.6917	3.80302	7.64574	7.75402	2.20632	3.42597	0.414106	1.09981	1.09281	1.32307
2310005E17Rik	0	0	0	0	0	0	0	0	0	0	0	0	0	0
2310007B03Rik	0	0	0.0445961	0	0	0.10065	0	0	0.306905	0	0.012639	0	0	0
2310008N11Rik	0	0	0	0	0	0	0	0	0	0	0.09592	0	0	0
2310009A05Rik	9.82724	3.65454	9.54984	3.14681	7.05339	4.63945	17.8887	23.4305	7.46112	10.546	13.4456	23.3599	22.5788	10.0171
2310009B15Rik	33.8477	36.2767	26.7502	25.4522	19.8809	27.2909	20.853	19.0909	24.4381	27.1405	21.3736	23.432	48.1499	45.7195
2310010J17Rik	57.7727	14.145	27.6601	15.8204	4.38869	41.9254	21.4531	7.88038	22.4586	47.9437	45.2639	47.104	183.564	135.582
2310011J03Rik	7.38323	4.93342	4.48552	6.50681	4.86945	1.95228	4.6263	3.85176	6.06574	4.36976	25.3402	27.0332	15.3529	14.8134
2310015A10Rik	11.0555	5.93015	7.2054	8.04803	19.978	11.7231	7.60055	13.8719	3.18902	4.80273	3.35265	5.5381	6.77936	6.38072
2310015D24Rik	0.343631	0.336057	0.235618	0.403102	0.620167	0	0.419955	0.699349	0.274656	0.0696377	0.0394145	0.011087	0.192281	0.11615
2310016D03Rik	0	0	0	0	0	0	0	0	0	0	0	0	0	0
2310016G11Rik	1.63221	0.722498	1.92786	0.956778	3.77021	1.62603	1.49466	3.32649	0.504851	0	0.0666257	0.188389	0	0
2310020H05Rik	0	0	0	1.06778	0	0	0.203957	0	0	0	0	0	0	0
2310022A10Rik	7.13844	9.48771	9.62383	8.64955	9.8318	9.42614	9.89973	10.9353	6.92713	7.51384	12.6772	14.8441	9.36059	15.0441
2310022B05Rik	4.89555	4.45203	3.83357	5.9938	2.89775	5.30699	1.70033	1.78423	23.216	29.911	7.13771	21.3505	7.61401	8.58042
2310030A07Rik	3.2471	1.139	0.284696	0.575062	0	2.9295	0	1.20056	0	0	1.07054	0.556387	0	1.23659
2310030G06Rik	6.01892	6.93765	5.96375	2.18723	2.19213	2.30762	0.625935	4.26101	3.85961	3.488	8.35695	7.23408	4.60234	4.33288
2310033P09Rik	27.9365	45.6807	35.31	32.8494	8.22631	54.4527	18.1956	7.95244	20.4891	42.1049	45.0507	37.0977	27.7454	25.9294
2310034C09Rik	0	0	0	0	0	0	0	0	0	0	0	0	0	0
2310034G01Rik	1.47482	0.554086	2.21611	0.729165	0.966145	0.839247	0.530387	0.779209	0.819722	0.417238	4.89249	3.93948	14.1269	5.6995
2310034O05Rik	4.59002	0.440107	1.09003	1.96326	4.60214	2.84867	1.57139	2.28032	0.16335	0.252883	0.0627877	0.323732	0.773607	0.471395
2310039H08Rik	24.4288	24.1121	25.1369	21.279	9.63305	4.21129	26.4934	14.325	34.6547	30.2654	34.8822	29.4393	45.5628	45.3364
2310039L15Rik	22.1762	19.5188	21.1092	31.5358	39.0977	38.3367	26.3399	30.9638	23.9324	28.6941	12.1552	7.90754	272.233	219.652
2310040G24Rik	3.85331	6.60533	1.81177	1.79102	1.22058	1.59188	1.39062	5.55047	1.92443	1.67945	1.7544	2.7467	17.2483	6.07925
2310043L19Rik	0	0.668372	0	0	0	0	0	0	0	0	0.263922	0.0738726	0	0
2310043M15Rik	2.49905	0.70988	3.20857	3.3941	7.50277	3.16078	2.35922	2.65627	0.846653	0.627784	1.03391	1.59632	1.73379	2.33624
2310043O21Rik	0	0	0	0	0.727351	0	0	0	0	0	0	0	0	0
2310050C09Rik	0	0	0	0	0	0	0	0	0	0	0.0323744	0	0	0
2310057J18Rik	0	0	0	0	0	0	0	0	0	0	0	0	0	0
2310057M21Rik	16.7542	15.8493	16.9857	17.1224	22.6763	19.7142	17.5112	19.7596	10.5581	9.95635	25.465	22.4467	26.7641	27.0406
2310057N15Rik	0	0	0	0	0.189709	0	0	0.496418	0	0.25287	0	0	0	0
2310061I04Rik	52.2386	44.8546	52.8946	51.3714	78.4498	67.71	75.391	80.9245	25.8733	23.9859	103.526	86.242	84.4671	81.7109
2310061N02Rik	0	0	0	0	0	0	0	0	0	0	0	0	0	0
2310065F04Rik	0	0	0	0	0	0	0	0	0	0	0	0.0119427	0	0
2310068J16Rik	10.2467	6.14123	5.26567	4.24951	5.12956	9.37396	3.53526	5.95258	3.14303	1.36835	3.41492	3.6243	9.02416	7.90569
2310069B03Rik	0.0657581	0	0.116171	0	0	0	0	0	0.0726377	1.12075	0.0729932	0.102004	0	0
2310069G16Rik	0	0.155871	0	0.311999	0.205689	0	0	0.217644	0	0	0.13766	0.203552	0.933961	0
2310075C17Rik	1.37926	0.60909	1.81902	1.19879	7.05339	2.06198	1.16349	1.68868	0	1.40613	0	0.76905	4.49539	2.77992
2310079G19Rik	0	0	0	0	0	0	0	0	0	0	0	0	0	0
2310081J21Rik	11.9688	13.2138	9.77157	9.28813	12.6301	8.52059	10.457	6.80359	0	0	2.75156	2.14508	28.6764	14.6041
2400006E01Rik	28.7335	20.7744	20.0466	26.4567	42.7807	28.9204	24.0274	35.1729	4.68325	4.54831	9.09504	8.80588	16.5977	12.236
2410002F23Rik	62.0184	59.2759	53.6163	55.2827	53.0826	70.0764	56.1067	46.7449	37.0623	36.3652	119.412	157.966	74.9262	79.6934
2410003L11Rik	0.942603	1.38244	2.21877	1.66772	4.0231	0	4.81424	0.759935	0.405371	1.22247	5.47981	5.57332	3.93739	12.2812
2410004B18Rik	31.6227	26.1569	25.2339	29.4612	32.0357	31.5929	28.0103	27.2486	24.2268	26.4028	57.6705	45.1947	43.012	39.5235
2410004I01Rik	0.750944	0.264923	0.532365	0	0	0	1.41035	0	0.558642	1.72723	0.84959	0.850226	1.57252	0.93641
2410004P03Rik	11.4468	9.19543	8.22535	12.7	27.092	13.9549	12.681	19.898	16.8745	15.4846	1.79392	2.22818	3.37	1.92663
2410006H16Rik	137.926	116.742	166.743	118.213	63.1322	120.919	106.653	97.7249	91.2751	110.668	77.6224	78.6852	176.616	124.624
2410012E07Rik	1.7215	0.624748	1.37144	3.12381	4.89563	1.92104	2.04271	7.09294	0.231363	0.891161	0.306806	0.5376	2.04388	1.18153
2410015M20Rik	123.627	104.319	97.5774	88.2759	53.3199	62.0367	70.9365	28.5097	33.9007	49.606	224.655	189.488	133.013	152.712
2410017I17Rik	0	0	0	0	0	0	0	0	0	0.170398	0.0196076	0	0	0.272937
2410018L13Rik	6.83717	3.84072	6.19968	6.2675	8.50244	5.25354	6.87422	4.88158	10.3308	6.81537	9.29208	23.188	2.6598	2.78812
2410021H03Rik	13.0211	6.52901	10.0757	10.9663	30.5378	13.5534	15.0317	21.173	9.36431	8.26641	2.92341	5.9038	5.95007	4.48988
2410022M11Rik	3.19691	1.05673	1.82753	2.53904	0.440298	0.191013	0.910504	3.33932	2.52653	3.70101	4.38377	5.41596	3.26139	1.83371
2410124H12Rik	0	0	1.98758	0.217836	0	0	0	0.911883	0.306341	0	0.130634	0.14153	1.28008	0
2410131K14Rik	8.93787	8.53412	6.89728	9.37517	9.65202	2.75098	5.94689	9.52951	5.09111	4.30936	26.213	27.0235	17.7956	21.6918
2410137M14Rik	0.53424	0	0.314837	0.62494	0	0	0	0	0	0	0	0.100914	0	0
2410141K09Rik	112.198	116.676	99.9299	146.442	240.521	241.776	200.015	408.873	17.1951	16.3922	76.7221	66.0777	87.9417	71.2536
2500002B13Rik	136.949	151.033	85.0935	87.6852	226.07	171.099	102.963	258.606	174.294	189.27	3.65019	30.569	10.9412	12.9403
2500004C02Rik	16.4612	21.7592	18.7915	14.5404	20.837	21.3987	22.0016	21.0223	33.612	31.8798	42.0579	17.7841	48.4671	39.7773
2510002D24Rik	4.96168	3.1177	5.5604	5.18285	5.83532	5.66204	5.15207	7.73548	8.80666	7.079	7.42671	8.13082	5.3324	4.62198
2510003B16Rik	7.06248	3.3023	5.1061	6.13837	6.1375	4.14052	7.96654	7.12097	0.544807	2.54121	3.46697	4.38059	0	5.35483
2510009E07Rik	1.82453	2.2322	1.08662	1.44644	2.74949	1.20663	2.09775	6.44417	28.3833	29.6436	1.22296	5.24599	3.48511	1.4313
2510039O18Rik	29.9582	27.7806	29.7241	32.826	26.9091	30.2437	22.7388	33.2942	30.7792	33.1709	116.926	122.189	35.1216	31.3394
2610001J05Rik	1.33818	2.42852	0.845274	1.29342	1.63511	1.63804	1.30254	2.09194	3.13464	3.21059	4.49847	7.2842	2.99933	2.74997
2610002M06Rik	2.9926	2.62014	2.60791	2.83266	4.56422	2.33781	2.55062	4.80865	9.20984	9.22685	6.38799	9.69374	5.18508	4.05712
2610005L07Rik	31.434	8.78823	14.1703	9.05412	37.9701	16.9252	11.7063	12.2493	30.8059	29.9748	7.77345	20.1578	19.5912	20.4963
2610008E11Rik	8.14232	6.08191	5.9241	7.85157	18.6529	14.885	13.5852	17.0807	15.6422	15.2984	5.57249	13.706	18.6703	17.7277
2610016A17Rik	20.689	4.44471	7.37439	5.34594	55.2833	11.7031	41.0365	16.4305	0	0	1.10749	1.403	7.0484	8.74665
2610020C07Rik	15.4399	10.6676	12.046	12.9864	25.8467	21.1226	20.9214	36.6807	6.9636	8.05891	18.8662	14.4986	14.9243	10.021
2610024D14Rik	9.49918	10.6552	11.106	13.3773	24.5852	17.1346	14.9523	32.7185	7.78449	7.78345	1.64419	3.21927	13.8872	12.6653
2610027K06Rik	4.05681	1.56502	2.18836	2.53578	6.38527	2.97158	2.54925	2.34107	2.01636	1.19963	0.130982	0.955931	2.86608	3.86572
2610028E06Rik	3.78625	3.11385	2.41568	3.19339	2.22997	2.84079	1.48586	4.10145	1.77313	1.6184	0.282606	0.623198	0.722721	0.949668
2610028H24Rik	0.925322	0.580843	0.843733	0.36728	0	0.285167	0.904109	1.12986	0	0	0.62312	0.640747	0	0.232189
2610035D17Rik	5.72589	2.4184	2.01042	2.3989	12.0931	7.46733	4.84927	13.1591	1.83961	1.81848	6.2422	11.8251	7.90345	7.34083
2610035F20Rik	0.944621	0.933587	0.934905	0.410314	0	0	0	0	0	0	0.34635	0.0979536	0.663194	1.18819
2610037D02Rik	7.9029	7.34563	6.87653	7.27905	12.0124	9.53343	7.08478	10.534	2.11485	1.75487	1.43152	1.98484	4.61406	4.70316
2610042L04Rik	1.51154	1.68626	0.62892	1.4777	0.275111	2.41051	0.949552	0.803507	1.65624	1.17552	6.19239	3.01986	2.04962	4.9577
2610044O15Rik8	23.3503	30.3384	26.1158	33.2838	49.5989	44.5808	29.7587	39.9864	16.8601	11.7466	15.9415	28.5728	23.6241	23.527
2610203C22Rik	0.320217	0.654271	0.094015	0.371439	2.71429	1.37616	0.630482	3.66069	0.647691	0	0	0.527091	0	0.401684
2610206C17Rik	3.31593	1.64474	2.20286	3.61454	5.09273	6.0652	4.95618	8.15518	0.933371	1.41389	0.450482	1.54929	1.5464	2.5195
2610301B20Rik	15.8442	12.1374	15.2327	17.1328	20.9168	17.0675	21.061	17.6837	20.889	13.2265	23.2151	25.2897	27.8322	21.6525
2610306M01Rik	0.411685	1.5746	0.36266	1.80541	2.38256	2.05594	0.115949	1.83708	4.48554	1.50886	5.41408	5.85175	5.29234	2.12943
2610307P16Rik	23.5539	18.814	20.5624	21.4303	40.8687	29.7898	28.0385	38.4235	3.35331	3.94993	3.32751	3.19317	37.1464	27.2898
2610316D01Rik	0	0	0.852373	0	0	0	0.408966	0	0.195897	0.306232	0.0848265	0.466865	0	0
2610318M16Rik	0.403492	0.177027	0.356041	0	0.703596	4.23435	1.03055	0.495405	0.479315	0	0.533213	0.246466	1.77896	0
2610318N02Rik	19.3089	15.5304	11.0965	11.8321	7.78978	5.19253	8.2677	7.50625	7.73388	4.36113	24.3979	20.3932	14.1765	19.7318
2610507B11Rik	182.879	181.546	197.428	189.676	208.517	198.107	194.975	214.39	136.432	128.438	289.268	334.134	238.805	212.21
2610507I01Rik	6.19688	5.90861	5.2953	5.03642	9.13436	11.9686	6.00377	13.7164	27.1005	24.9799	13.1013	14.2138	10.1268	12.0582
2610524H06Rik	106.852	93.716	94.7724	94.6361	164.408	149	161.782	130.006	40.5528	36.6441	136.909	109.542	173.257	126.683
2610528A11Rik	0	0.763523	0.573274	0.570473	1.25403	0	1.1049	0	0.790033	0.397127	0.338225	0.0617905	0	0.63792
2610528J11Rik	0	0	0	0	0	0	0	0	1.06131	0	0	0.0920069	0	0
2700012I20Rik	1.88717	1.23998	1.6414	0.408383	0.543978	0	2.57929	0	1.2321	0.915843	1.91995	2.4282	16.1863	2.28405
2700038G22Rik	32.9786	25.6773	32.3995	30.7318	46.3461	58.4057	29.8717	67.0129	30.2556	31.6147	28.8605	25.7217	30.6001	29.3254
2700046A07Rik	0	0.65993	0.0473946	0.65204	0	0	0.361819	0	0.068713	1.04206	0.0285515	0.338256	1.87808	0.94756
2700046G09Rik	0.664835	0.845961	1.10681	0.782503	0.776935	1.69346	1.12444	2.44352	1.94168	4.90987	3.74674	3.31103	0.844013	3.95626
2700049A03Rik	19.0403	18.5005	20.4642	22.8086	33.6347	23.5473	21.5969	27.5105	13.6899	12.5228	17.4574	20.5352	31.0962	26.8358
2700054A10Rik	2.98212	2.80089	3.73481	3.36671	4.75533	4.50317	2.7812	3.33094	1.5396	2.51229	2.02865	2.31198	7.2073	5.47364
2700062C07Rik	42.9141	49.8973	33.614	46.1912	32.884	59.2495	50.9517	47.7554	28.7428	30.781	38.1771	37.1022	35.8139	33.7873
2700069I18Rik	12.1176	3.63362	6.17445	9.91901	11.5385	9.4879	14.7425	12.1767	3.71957	2.97667	1.75843	1.98174	7.89293	3.53853
2700070H01Rik	5.8695	7.23546	5.12233	7.10497	13.3769	10.2153	8.36378	12.2044	1.56081	3.01676	2.06003	3.39306	10.3295	9.53707
2700081O15Rik	5.79279	7.40892	6.39747	5.86443	4.79923	5.35603	5.13472	4.21294	26.2963	24.7842	25.8645	36.8624	11.1689	10.2442
2700089I24Rik	2.4961	2.25363	2.64703	1.99871	3.99556	3.82434	5.16577	3.53025	10.8784	12.8664	0.420455	0.902971	9.80342	6.72926
2700097O09Rik	27.4131	18.4427	24.8587	28.9639	29.2319	42.5647	22.0265	40.2596	19.8171	15.8668	40.8559	41.6353	27.3406	30.5983
2700099C18Rik	62.8658	83.9427	74.1599	62.7031	59.7161	80.6443	54.6129	56.1556	11.4335	12.6872	56.7	36.8479	67.284	58.4349
2810001G20Rik	27.1432	19.4042	19.4895	15.8855	31.7931	38.6159	20.5192	16.6463	14.6014	16.8928	37.8065	28.53	37.3311	31.0782
2810002D19Rik	3.88408	7.05382	6.64722	3.49755	9.88481	10.6698	6.83875	12.7393	6.864	9.32546	12.8816	13.3296	11.6319	16.3609
2810004N23Rik	134.392	124.7	104.38	108.2	143.194	73.9655	100.459	103.372	95.1609	102.522	137.229	124.161	150.935	125.882
2810006K23Rik	36.0966	30.6997	32.668	34.0359	75.8829	44.1711	34.169	36.0875	32.4442	32.3611	21.6269	24.3617	39.3041	43.7144
2810013P06Rik	12.8393	12.9791	8.9082	11.9249	17.8116	11.5414	17.7336	21.4906	10.78	9.72109	24.9637	19.8378	21.4606	27.2153
2810021J22Rik	5.56726	5.47683	4.11126	6.16214	10.2675	9.4955	5.91374	8.8447	7.50713	8.69382	12.2205	13.9879	11.819	8.68527
2810025M15Rik	24.9407	18.6741	14.0739	14.5249	16.2628	19.4993	18.7069	22.6224	17.1883	12.7298	56.9652	45.1165	51.9674	38.1635
2810029C07Rik	1.6371	2.02762	1.97876	3.36334	6.04475	5.32629	3.46926	5.08648	1.37761	1.39799	3.96226	2.26939	7.6049	5.7923
2810032G03Rik	1.12648	3.15376	1.4501	2.33842	7.89769	2.03451	0.346668	2.12888	1.02927	1.18612	2.23321	2.7381	7.29345	7.66183
2810047C21Rik1	11.6926	10.846	14.8911	11.6259	14.9674	12.8089	12.89	16.2569	6.22825	3.00049	9.62731	10.0275	24.4726	16.088
2810049E08Rik	1.65491	1.57138	2.92392	1.08139	7.53001	0.885544	2.56363	3.3012	0.908312	1.64826	0.0339758	0.492573	2.24012	0
2810403D21Rik	2.23639	1.58682	3.06008	2.31481	12.1144	17.6724	4.59094	14.8881	0.336319	0.256212	1.44614	2.43085	9.47638	6.96209
2810404M03Rik	0	0	0	0	0	0	0	0	0	0	0	0	0	0
2810405F15Rik	0.163923	0.288124	0.432291	0.426576	1.42243	0.66161	0.279271	0.50538	0.109806	0.334114	0.0201685	0	0	0.2574
2810408A11Rik	5.82782	3.42669	2.45661	2.6476	6.7729	12.919	6.57155	0.19865	3.29885	2.54131	4.15125	4.03496	4.55508	4.66803
2810408I11Rik	35.6527	32.2792	40.3583	31.7135	39.4791	31.5107	64.0815	32.063	21.1932	16.2284	44.67	28.5343	31.9757	22.0641
2810410L24Rik	7.17015	5.59427	4.58522	4.54461	3.32026	6.40136	4.50965	2.63332	1.52949	1.70598	4.7432	9.30644	3.85416	3.13173
2810414N06Rik	7.85752	11.2006	9.19904	10.7469	19.0431	15.1908	10.3367	17.1851	10.1872	14.6009	1.48279	4.88682	6.53096	3.50236
2810429I04Rik	45.5621	18.4983	25.4408	20.0815	43.4107	10.0936	29.8359	79.2679	6.38962	8.84983	12.7243	19.5235	8.0469	13.7845
2810433D01Rik	9.00159	8.29855	7.75585	7.44653	15.1719	11.9513	12.9291	19.4933	2.58188	5.5638	0.611518	1.60169	2.32439	1.382
2810442N19Rik	0	0.704129	0.424894	0.278725	0	0	0	0	1.19552	0.893282	0	0.0470781	0.954835	0.565946
2810454H06Rik	1.2229	0.691453	0.519168	1.13178	1.68727	3.58456	0.597309	0.959425	0.662995	1.24075	0.52898	0.831426	3.4188	3.85409
2810459M11Rik	1.47754	1.06933	0.802136	1.35713	5.28848	1.82968	4.38575	6.10798	1.06669	0.451682	1.03642	1.43809	2.92393	3.06632
2810468N07Rik	3.46441	2.72766	2.97302	5.63278	3.34841	1.83652	3.8859	4.80821	0.817021	0.176266	5.80742	6.45397	3.16813	4.43201
2810471M01Rik	1.46333	0.640949	0.633668	1.64524	3.10267	2.3439	1.11734	1.99415	4.29346	3.54832	0.298009	1.11022	2.52094	3.12368
2900005J15Rik	3.21343	3.65541	2.61306	3.23119	5.94023	5.07336	5.51451	5.1444	9.98815	6.09091	1.87201	2.14111	3.3108	3.13555
2900009J06Rik	3.6726	5.40613	1.07634	1.06401	0	6.10054	1.54902	1.49884	11.2378	1.24806	6.36477	7.84977	0	2.42305
2900011O08Rik	1.27245	1.55367	1.07816	0.720957	1.18178	0	1.98012	1.07462	0.692918	1.59701	0.797908	0.994166	0.778976	0.953704
2900026A02Rik	40.8304	23.5541	25.7031	34.5841	91.5217	74.4284	74.2864	79.8595	10.4736	6.92095	9.97723	11.9454	27.9168	34.3511
2900040C04Rik	1.27557	0	0.567848	1.88605	1.56526	3.15289	1.07295	6.51774	1.01725	2.83036	0.17926	0.187958	6.92388	0
2900041M22Rik	2.20529	2.11029	2.44748	1.68601	2.76769	3.8104	2.99157	2.56629	0	0	3.47585	2.70763	6.2236	9.15792
2900052L18Rik	7.49349	6.74301	8.13694	7.59127	8.66844	9.33884	7.40781	9.32598	5.64497	6.00174	4.7102	6.99935	9.26514	6.62062
2900052N01Rik	0.657513	0.308497	0.236287	0.840371	3.01606	1.30839	0.9306	0.480669	0.105372	0.648174	0.0479884	0.117987	1.44267	1.0932
2900055J20Rik	0	0	0.420067	0	0	0	0	0	0	0.476287	0	0.201728	0	0
2900057B20Rik	0	1.59271	0.369703	0.244033	0.64604	0	0.117964	0	0	0.514088	0.110947	0.0409461	0	1.24515
2900060B14Rik	0.333135	1.45255	1.1618	0	1.54551	0.647608	3.61875	0.400247	1.70066	2.67034	0.171883	0.193553	2.07608	1.29463
2900076A07Rik	11.8663	16.1557	8.85741	14.8614	28.1073	56.9133	17.9682	20.329	1.16474	3.26225	4.76926	7.74243	6.98899	4.79364
2900079G21Rik	0	0.0350271	0	0.0701972	0.0464298	0.0795596	0.168565	0.194915	0	0	0	0	0	0
2900092C05Rik	0	0.778993	1.08678	0	0	0	0.601988	0	0	0	0	0	0	0
2900092D14Rik	2.43088	0.749988	1.36723	2.09789	2.91583	1.25316	1.50036	3.82414	1.35197	1.13355	0.221804	0.627549	11.7045	7.21002
2900093K20Rik	14.1521	15.4752	8.29519	6.15014	9.95594	19.8138	12.5065	7.83836	0	0	32.8956	17.6606	8.04114	11.285
2900097C17Rik	48.4749	39.8943	41.9925	45.5967	49.1236	50.202	47.7179	64.7977	86.7952	82.1549	141.948	165.176	80.6034	78.6276
3000002C10Rik	4.03292	3.9865	2.11807	2.54775	6.73416	7.99191	7.6308	1.79797	6.52112	8.46235	5.65335	5.63037	9.86164	3.85836
3010001F23Rik	0	1.10341	0	1.2239	0.208548	0	0.306582	0.420486	0.826974	0.984568	0.319437	0.915854	1.00631	0
3010003L21Rik	7.33255	5.52862	3.22876	3.35843	4.08125	4.02498	3.82764	3.83302	3.54865	3.36058	7.59127	8.77453	14.9953	12.9841
3100003L05Rik	0	0	0	0	0	0	0	0	0	0	0	0	0	0
3110009E18Rik	5.94248	9.48518	6.05502	12.741	5.939	5.45679	17.0912	4.61544	3.68298	2.86318	24.3715	25.4366	23.0969	17.6935
3110009F21Rik	1.45514	0.484484	1.8431	2.05321	3.21812	1.20597	2.40276	3.39671	0.325852	0.820841	0.167126	0.246938	2.42219	1.99794
3110015C05Rik	6.90988	7.94549	9.63896	17.0196	26.0125	8.68818	8.23464	19.0701	8.40835	11.0041	0.370835	0.462878	19.0726	14.5945
3110021A11Rik	18.2878	7.95868	11.3116	13.7821	21.619	9.17815	7.46573	21.9961	2.4624	3.36831	2.04634	2.91076	6.69659	4.48949
3110039I08Rik	0	0.0317839	0.0318677	0.252364	0.0845207	0	0	0.0891871	1.824	2.38874	0.131599	3.31034	0.23481	2.01509
3110039M20Rik	0.176034	0	0	0	0	0	0	0	0	0	0	0	0	0
3110040N11Rik	19.1968	27.2405	20.865	20.4835	17.7654	15.0638	17.0387	21.8605	9.83111	17.307	20.8858	22.0587	21.0455	21.2692
3110045C21Rik	2.83838	4.61284	6.30616	3.89087	3.81277	5.95951	4.39088	4.6212	4.18206	3.26547	23.3376	14.5557	21.0231	17.8771
3110056K07Rik	26.7871	23.7941	22.915	22.2061	26.5662	34.1393	25.3685	36.8551	10.0715	8.97231	23.1173	28.5025	39.2599	33.3589
3110070M22Rik	0.270466	0.656234	0.437371	1.95025	0.428654	0.245573	3.72222	2.65485	0.831919	11.1447	1.23628	1.13811	0.69461	1.2918
3110082I17Rik	62.2197	59.6361	45.3704	62.2887	56.2887	33.4629	43.6942	29.4404	38.7488	41.2396	42.3723	37.06	47.0163	35.246
3110082J24Rik	4.48663	3.37009	4.53226	1.78663	1.05176	2.99194	4.79862	4.73704	0.323222	0.487581	2.7396	3.05708	11.2692	7.7343
3110099E03Rik	0.63295	0.184054	0.29542	0.332856	0.586527	0	0.56891	0.977174	1.29062	0.314064	0.441209	0.432641	1.13422	0.9779
3200001D21Rik	3.08313	3.00816	2.2257	2.66592	5.57018	8.1698	5.42716	2.83506	2.10403	2.72269	0.156204	0.526631	0.865028	1.5401
3300002I08Rik	7.74993	6.19803	6.51666	6.79104	8.38555	5.52954	6.18618	5.38436	4.79851	6.05853	3.66426	6.64216	8.92044	1.13622
3300002P13Rik	0.76026	0	1.11524	0	0	0	0.215346	0.155116	0.7664	1.15729	1.4988	0.995366	1.46402	0
3300005D01Rik	0	0.101275	0.122052	0	0	2.71244	0.618015	1.03988	0.241104	0	0.0566073	0.0399423	1.26254	0
3425401B19Rik	0.083261	0.333736	0.167498	0.227764	0.215153	0.312398	0.232708	0.224844	0.937398	0.847788	0.0238664	0.109947	0.762699	0.735431
3632454L22Rik	5.81209	3.53626	5.14135	3.82553	8.46447	7.62371	8.41134	9.54798	4.0887	3.88789	0.225257	1.03819	5.9969	3.89851
3830403N18Rik	6.49769	3.01554	4.21157	6.51048	7.72099	15.5106	7.05942	6.44649	1.77541	1.56889	44.0865	32.6576	48.5536	42.9675
3830406C13Rik	11.7875	9.86855	12.0196	10.3511	22.2084	30.3214	23.2232	25.2117	10.0636	8.57984	13.7238	17.2337	15.1377	11.4946
3830408C21Rik	22.679	21.77	19.7651	17.3227	31.9942	17.2114	16.4401	18.5878	4.50622	7.13122	3.90715	4.0835	5.05003	5.96924
3830417A13Rik	4.72645	2.59331	4.30384	6.46571	7.41748	1.90112	2.74596	6.22967	2.19175	0.932796	5.48386	4.55383	4.06816	5.61131
3830432H09Rik	4.07433	3.12603	4.84079	4.91951	10.06	9.07859	4.11437	5.60527	3.5027	3.20179	0.462083	0.669016	0.789431	1.11134
3930402G23Rik	0.295327	0.243255	0.286628	0	0.0416449	0.0716666	0	0	0.350013	0	0.0196024	0.0110095	0	0.124253
4430402I18Rik	1.32528	4.30566	3.6886	1.29297	1.90407	0.658467	3.99768	1.14691	2.66756	5.22407	0.825179	0.5681	1.58581	0.372974
4631405J19Rik	1.06814	1.21772	0.659082	0.279232	0.12353	0.319107	0.363022	0	0.27375	0	0.107208	0.209869	3.59382	1.58171
4632404H12Rik	15.0358	11.8364	12.2077	13.2711	24.349	13.9865	15.1906	23.5999	6.6205	5.6414	12.107	8.59707	15.7248	18.446
4632415L05Rik	21.219	16.8812	18.28	19.4904	38.1283	26.7664	24.0556	36.2042	21.5993	25.2765	3.15717	8.37551	10.2694	12.0076
4632427E13Rik	40.6712	45.6486	46.4656	54.707	87.6559	56.1326	49.2526	124.198	38.7601	47.6471	1.18762	1.72833	22.2531	21.556
4632428C04Rik	0	0.0467956	0.0936352	0	0.78285	2.4938	0.604204	0.22543	0.116391	0	0.0247403	0.118704	0	0.210073
4732414G09Rik	2.12557	0	0	0.615815	0	0	0.597682	0	0	0	0.35083	0.19753	0	0
4732416N19Rik	19.5055	8.5721	10.265	11.492	25.2089	14.2665	13.1173	38.5408	7.48066	10.5025	4.26966	5.38517	0	2.29127
4732471J01Rik	5.66256	3.44948	6.57265	4.86622	4.69178	6.27344	5.25196	4.10748	3.6783	4.4549	1.92826	2.54381	7.17883	7.59979
4732490B19Rik	0.0466457	0	0	0.163964	0.377992	0	0.354262	0	0	0	0.169738	0.284702	0	0
4732491K20Rik	1.91631	1.16744	1.17067	1.74724	2.96365	0.691557	1.79354	4.83822	0.612366	1.38175	0.98352	2.0946	2.15789	1.17177
4831407H17Rik	0	0	0.19736	0	0.385512	0	0	0	0.544287	0	0	0	0	0
4831440E17Rik	8.92022	5.70398	8.09094	8.20507	15.0894	15.2008	8.31958	12.0529	1.98185	1.48066	3.6403	3.849	8.96234	8.17893
4833411C07Rik	0	0.0982154	0	0	0	0	0	0	0.661919	0	0	0	0.607431	0.366916
4833412C05Rik	3.65052	7.15689	4.43894	4.61955	3.36031	2.12412	4.666	4.28377	0.320803	0.724386	0.565059	0.919394	2.8067	2.49029
4833415N18Rik	5.31223	6.1949	5.25693	5.21823	10.1479	7.15766	5.59238	13.7263	2.26555	6.43015	0.829336	1.01002	2.0438	1.73551
4833417C18Rik	18.9324	18.9224	15.6895	15.6692	12.5758	11.5439	20.6381	20.8127	20.3088	12.8462	7.72383	5.76167	19.9382	12.2013
4833418N02Rik	0.162932	0.215046	0.574404	0.424576	0.46965	0.242319	0.894565	0.398418	1.91786	1.12692	0.930569	1.5336	0.466819	0.283809
4833419F23Rik	7.45238	6.40818	14.2022	4.78699	8.47482	0.168647	8.32204	4.93186	1.7905	1.34618	2.70444	3.60618	8.35127	6.72496
4833420G17Rik	63.8215	64.3513	54.5388	58.6406	131.198	108.253	75.7233	101.484	31.7767	37.8111	53.3308	59.4301	83.3717	79.0939
4833422C13Rik	1.62111	0.979019	0.756419	1.315	3.05584	4.91041	3.07472	2.31048	2.32786	1.74231	0.247906	0.168405	2.18822	0.865149
4833422M21Rik	2.52194	1.15347	1.73296	1.43277	3.64616	2.30421	3.23771	0.793911	0.111907	0	0.352975	0.139956	1.60679	0.933396
4833423E24Rik	0	0	0	0	0	0	0	0	0	0	0.0762342	0	0	0.211472
4833427F10Rik	11.5853	10.7371	11.2145	11.7655	26.2068	12.7126	12.1248	22.8158	11.5329	12.0095	1.19888	3.61341	9.45862	11.2775
4833427G06Rik	0.40926	0	0.181197	0	0.482943	0	1.75092	0	0	0	0.104	0.231619	3.87588	0
4833428L15Rik	0	0	0	0.357875	0	1.63035	0.86501	0	0	0.571552	0.0814437	0.0607816	0	0
4833438C02Rik	1.95712	0	2.02586	0.6844	0	0.631224	0	0.864875	9.68274	10.6833	1.15308	1.77043	0.749905	1.17878
4833439L19Rik	141.383	127.203	141.686	145.735	149.674	140.702	131.943	154.856	144.74	143.959	169.153	172.344	99.0964	99.3957
4921501E09Rik	0.134835	0.0235318	0.0711825	0.0472118	0.125777	0	0.20558	0	0	0	0	0	0	0.0939839
4921504A21Rik	1.52802	1.72262	1.07097	2.05718	3.75039	1.2255	2.94742	4.5054	1.82244	1.98167	0.200722	0.905272	0.943647	0.558892
4921504E06Rik	0.519764	0.0505062	0.354374	0.100768	0	0	0.245731	0	0	0	0.0156985	0	0	0.217978
4921507G05Rik	1.40027	0.195085	0.13016	0.445105	1.69332	0	0.685633	0.361184	0	0	0.358489	0.25526	2.21325	1.32523
4921507P07Rik	4.08708	5.56383	2.36615	3.94427	5.06843	6.34798	1.60204	5.82741	1.79983	0.631306	6.23417	6.41087	6.2449	4.4476
4921508D12Rik	0	0	0	0	0	0	0	0	0	0	0.0333234	0.0744703	0.70869	0
4921509C19Rik	0.398521	0	0.145199	0.236826	0.330096	1.34503	0.163619	0.23447	0.248505	0	0.0495203	0	0	0.128115
4921509O07Rik	0	0	0	0	0	0	0	0	0	0	0.0112636	0	0	0
4921511C10Rik	1.01494	0.670712	0.894131	1.77963	4.71062	0.507532	3.22216	1.34374	0.211883	0.482992	0.0220621	0	2.45287	0.873353
4921511C20Rik	0	0	0.0653593	0	0	0	0	0	0	0	0	0	0	0
4921511I17Rik	0.191655	0.758253	0.506474	0.756518	8.45922	3.97037	6.37433	3.18684	0.126136	0.908614	0.537313	0.165421	1.95649	2.10866
4921511M17Rik	0	0.309845	0	0	0.0818496	0	0.08136	0	0	0	0	0	0	0
4921513H07Rik	0	1.02816	1.03417	1.1812	0	0	0	0	0	0	0	0	0	0
4921513I03Rik	2.80411	3.47208	4.11623	3.93478	6.80675	4.14599	5.41174	6.62425	1.12993	2.27746	0.341567	1.69146	0.920484	2.27607
4921515E04Rik	15.9816	11.2844	17.1813	16.0101	36.8359	17.7242	18.4919	34.878	5.83523	5.38734	0.719959	2.03015	7.50111	6.17152
4921517D22Rik	0.0343881	0	0.242602	0.0601164	0.0401051	0	0	0	0.0434118	0	0.0928991	0	0.207039	0
4921518K17Rik	5.47677	5.02541	5.60266	6.15702	11.5244	5.20947	7.84958	8.33347	5.35699	6.92386	1.09912	1.6161	5.63677	4.52932
4921524J17Rik	7.83762	6.78656	10.0025	9.61683	13.5951	13.918	13.0577	16.5353	8.33883	10.4081	19.4789	22.2688	24.8212	21.7703
4921524L21Rik	0	0	0.14684	0	0	0	0	0	0	0	0	0	0	0
4921525O09Rik	0.0680241	0	0.0300975	0.208263	0	0.101822	0	0	0.0422078	0	0	0.0096354	0	0
4921529L05Rik	3.205	1.92459	0.990379	2.68719	2.62164	0.847177	1.20967	0.905184	2.22685	1.96877	0.0351468	0.653932	2.81093	1.61014
4921530L21Rik	0.124713	0.878976	0.877056	0.435038	0	0	0	0	0	0	0	0	0	0
4921531C22Rik	7.57478	8.29183	6.48359	9.19381	8.18722	10.3043	4.38117	9.18046	15.6347	16.2353	12.3185	13.3316	5.21843	9.56695
4921531P14Rik	54.2737	49.9836	53.4285	54.4293	73.8024	25.4281	77.479	31.2369	10.9498	7.56666	18.8348	19.916	48.5283	46.1581
4921533I20Rik	0	0	0	0	0	0	0	0	0	0	0	0	0	0
4921534H16Rik	1.17057	0.78693	0.275419	1.32735	6.05123	1.70172	3.1915	1.85441	0.319998	0.702541	0.0873466	0.0736388	5.53656	2.9239
4921536K21Rik	3.30363	4.26917	3.64959	5.05858	9.93486	17.8389	4.98275	7.57135	4.59462	2.31582	3.9853	1.88671	2.90953	5.11457
4921539E11Rik	1.49501	0.617957	0.556206	1.53047	4.74751	0.561807	3.1634	1.68087	0	0	0.0782236	0.0879232	0.325246	0.748975
4922502B01Rik	1.2528	0.840297	0.894457	0.988807	4.08543	2.39237	2.1189	3.21785	0.439697	0.223082	0.225409	0.305719	2.87657	1.48156
4922502D21Rik	1.6967	2.03164	1.15555	1.48577	1.4341	1.83907	4.06018	0	0	0	0.187095	0.165026	0	0
4922502H24Rik	0	0	0	0	0	0	0	0	0	0	0	0	0	0
4922502N22Rik	0.447415	4.61495	1.78453	0.886005	1.18511	0	3.91158	1.77875	0	0.211669	0.761608	0.572877	0	0
4930401C15Rik	0	0	0	0	0	0	0	0	0	0	0	0	0	0
4930401O10Rik	0	0	0	0	0	0.610457	0	0	0	0	0	0	1.15263	0
4930401O12Rik	0.183298	0	0.802836	0	0.849059	0	1.8727	0.224259	0	0	0	0	0	0
4930402F06Rik	0	0	0	0.0859789	0.575779	0	0	0	0	0	0	0	0	0
4930402F11Rik	0.136499	2.87821	0.723555	0.844805	6.8852	3.94016	4.72198	3.49577	0	0.254383	0.0804555	0	0.950511	1.08812
4930402H24Rik	20.3716	17.5695	16.7937	18.8364	29.0115	19.8144	23.164	29.1287	17.2844	19.2194	23.6502	31.1387	29.9444	28.0256
4930402K13Rik	0.0669089	0	0.059089	0	0.0771707	0	0.339429	2.05112	0.078157	0.118852	0.0365649	0.0205335	0.39841	0
4930404A05Rik	0	0	0	0	0	0	0	0	0	0	0	0.231255	0	0
4930404H11Rik	0.215608	0	0	0	0.250699	0	0	0	0	0	0.171695	0.32423	1.399	1.64008
4930404I05Rik	1.17095	2.59464	0.520611	1.59855	2.19691	2.2047	1.11195	3.07882	0.179644	1.36985	6.70059	6.27144	0	1.8889
4930404N11Rik	0.785823	0.282227	0	0	0	0	0.598273	0	0	0	0	0	0	0
4930405A10Rik	0.290785	0	0	0	0.167663	1.30646	0.49421	0	0	0	0	0	0	0
4930405A21Rik	3.50133	2.83024	1.67057	5.00704	7.62271	4.38818	2.73255	2.67146	1.88627	0.853479	0.38871	0.645297	2.60993	2.07556
4930405D11Rik	0	0	0	0	0	0	0.238022	0	0	0	0	0	0	0
4930405J17Rik	1.83587	4.28568	3.23644	6.13917	9.14248	6.72432	5.44038	2.98588	2.94551	2.83932	0.0801313	0	3.30093	1.95991
4930405L22Rik	0	0.323985	0	0	0	0	0.309439	0.449118	0	0	0	0	0	0
4930405O22Rik	2.98962	4.44636	6.19441	4.3167	14.3345	5.0894	3.30926	7.55668	1.10556	6.20335	0.211538	0.329771	7.48985	4.40169
4930406D18Rik	0	0	0	0	0	2.60041	0.44691	0	0	0	0	0	0	0
4930407G08Rik	0	0	0	0	0	0	0.216138	0	0	0	0	0	0	0
4930407I10Rik	0.231415	0.0204724	0	0.0403091	0.15953	0.486231	0	0	0.0287455	0.0439194	0.0674197	0.0125965	0.116924	0.218521
4930407I19Rik	0	0	0.277765	0.137381	0.181693	0	0.263654	0	0	0	0	0	0	0
4930412B13Rik	0	0	0	0	0	0	0	0	0	0	0	0	0	0.376036
4930412C18Rik	0.216245	0.876287	0.954514	0.233071	1.02682	0.374484	0.546693	0.394887	0.482537	0.495451	1.26814	0.98012	3.51609	3.31237
4930412O13Rik	0.605492	0.847249	0.744303	0.620227	1.85301	1.33246	0.736555	1.49054	0.525892	0.636049	0.00652785	0.383282	0.270928	0.1654
4930413E15Rik	0	0	0.0897923	0	0	0	1.55692	0.375619	0	0	0.0269166	0.234583	0	0
4930413F20Rik	2.21992	2.42604	4.49727	2.02999	6.14947	6.15033	3.65304	4.33464	0.698282	1.83862	0.0689954	0.465158	0	0.424088
4930413G21Rik	5.77183	7.32055	5.88435	6.7153	3.63938	4.75098	2.67288	2.32758	0.275399	0.410394	11.1238	25.239	71.7287	66.1382
4930413M19Rik	0	0	0	0	0	0	0	0	0	0	0	0	0	0
4930414N06Rik	1.60814	2.24761	2.29423	1.34213	3.30551	0.319823	1.91713	3.57039	0	2.94622	0.39499	1.96894	2.88246	0
4930415L06Rik	0	0	0	0	0	0.204896	0	0	0	0	0	0	0	0
4930415O20Rik	1.1623	0	0	0	0	0	0	0	1.01615	0	0.28776	0	0	0
4930417O13Rik	0	0	0	0	0	0	0.107444	0	0	0	0.129002	0.291028	0.729779	0.435703
4930417O22Rik	3.27269	2.89254	3.29073	3.69545	7.74421	4.99133	4.67236	5.8973	8.68939	6.65973	0.349742	0.371194	11.5572	7.56944
4930419G24Rik	0	0	0	0.115055	0	0	0.223275	0	0	0	0	0	0	0
4930422M22Rik	1.86349	2.40488	2.79242	2.99806	2.8091	2.41721	4.3569	2.79693	0.527864	1.08016	2.92794	3.31502	10.4641	4.08109
4930423M02Rik	0	0	0	0	0	0	0	0	0	0	0	0	0	0
4930425K10Rik	0	0	0	0	0	0	0	0	0	0	0	0	0	0
4930425L21Rik	0	0	0	0	0	0	0	0	0	0	0	0	0	0
4930425O10Rik	0.440082	0.61462	0	0.53464	1.52243	0.522588	0.818099	0.548242	0.546832	0.330528	0.148091	0.113171	0	0.315314
4930426D05Rik	0	0.0681781	0	0	0	0	0.261776	0	3.15888	3.89838	0.136074	0.329909	0	0.286199
4930426L09Rik	1.78254	0.67177	0.523768	1.18443	1.95999	0.253153	0	0.823618	0.207213	0.156425	0.195486	0.412954	1.44259	0.566363
4930428D20Rik	0	0	0	0	0	0.427797	0	1.05105	0	0	0	0	0	0
4930428E07Rik	0	0	0.277337	0	0	0	0	0	0.195861	0	0	0	0	0
4930428G15Rik	0.19814	0	0	0	0	0.777719	0	0.730861	0	0	0.207055	0.34984	0	0
4930428O21Rik	0	0.0617623	0.123883	0	0	0	0	0	0	0	0.036786	0.062673	0	0.507871
4930429B21Rik	0.488131	0.483293	0.538255	0.643306	0.56774	0	0.726913	0.374552	0.159263	0.734516	0.137529	0.154785	1.35098	0.607478
4930429D17Rik	0.149548	0.131596	0.132176	0.0633781	0.854654	0.0738721	0	0.182223	0.181591	0	0.0406335	0	0	0
4930429F11Rik	0	0	0	0	0	0	0	0	0	0	0	0	0.44613	0.265484
4930429F24Rik	0.236884	0.275565	0.208615	1.10333	0.183632	0.077586	1.06554	0.962871	0.291986	0.30072	0.427967	0.659904	0	0
4930429H19Rik	2.50843	2.17435	4.15781	4.29828	8.04755	6.00116	4.83245	9.40068	2.39398	2.87929	10.5747	0.711522	3.10093	4.33745
4930430A15Rik	0.835555	0.561089	0.789955	0.222807	0.446013	0.253415	0.865014	0	0	0	0	0	0	0
4930430F08Rik	11.4011	11.4947	9.19236	11.9663	20.2549	18.2751	12.3856	8.33	5.12057	5.61009	21.1329	19.1081	16.9807	16.5154
4930430F21Rik	0	0	0.345551	0	0	0	0	0	0	0	0	0	0	0
4930430J02Rik	5.55408	1.22636	4.27286	3.62049	8.67867	2.07582	4.68519	18.7002	0	1.41558	0.343767	0.774212	0	5.60326
4930431F12Rik	8.64987	6.09622	9.96303	9.7021	21.8586	9.2793	12.4624	10.5655	4.30888	6.00872	0.681149	3.04364	3.50754	2.75705
4930431P03Rik	0.0494856	0	0.218229	0.043194	0.115056	0.295333	0.29343	0.301945	0.0605896	0	0	0.0156498	0	0.502042
4930431P22Rik	0	0	0	0	0	0	0	0	0	0	0	0.073795	0	0
4930432J09Rik	7.60664	5.74933	6.88457	7.80835	13.6911	8.68033	7.84001	14.8711	2.20648	2.62646	0.152804	1.90972	0.80861	1.19148
4930432K21Rik	9.30156	6.75526	10.7979	10.1797	13.56	12.8024	10.8047	14.2141	4.2321	2.3118	19.5208	16.5826	21.0691	20.8674
4930432L08Rik	5.71459	4.02138	4.51306	2.76331	5.55115	3.60409	4.81875	9.19626	3.11495	2.43161	1.04912	1.18979	4.538	3.07956
4930432M17Rik	0	0.104015	0	0	0.954478	0	0	0	0	0	0.0628291	0	0	0
4930432O09Rik	0.350313	0.61528	0.930176	0.102667	0.13622	1.22208	0.596365	0.356461	0	0.108276	0.0943143	0	0.317437	0.563856
4930433B08Rik	0	0	0	0	0	0	0	0	0	0	0	0	0	1.10004
4930433I11Rik	0.815395	0.615763	0.821819	1.04558	1.61419	1.37391	3.27455	0.356389	0.0714016	0.325958	0.0834336	0.209427	1.116	1.65856
4930433N12Rik	8.31271	11.9087	7.41156	8.61003	10.3849	8.05372	10.9455	11.4419	1.31341	2.1895	1.47345	2.79139	4.00862	4.50982
4930434J06Rik	0	0	0.13814	0	0	0	0	0	0	0.579184	0	0	0	0
4930435E12Rik	0.542668	0	0.561417	0	0	0.272419	0.230964	0	0	0	0	0	0	0
4930435F18Rik	88.9373	92.2894	90.4017	111.097	220.361	126.112	105.955	166.864	77.6779	98.7547	8.66392	18.117	26.6615	21.6532
4930438E09Rik	0.212342	0	0.560429	0.187011	0	0	0.179243	1.03563	0	0	0	0	0	0
4930440C22Rik	0	0	0	0	0	0	0.0645347	0	0	0	0	0	0	0
4930440I19Rik	0.394046	0.115638	0.11626	0	0.921182	0.396055	0.557378	0.160901	0	0	0.0356728	0.0784622	0	0
4930441H08Rik	0.517223	0	1.36426	0	0	1.03099	0.872617	0	0.678283	0	0	0	0	0
4930441J16Rik	1.90681	0	0	0.414327	0	0	0	0	0	0	0	0	0	0
4930442J19Rik	0.0852547	1.18342	0.985963	0.652902	0.38887	1.12745	0.0984833	1.24105	0	0	0.0834483	0	1.34589	0.708942
4930442L01Rik	0.574523	0.25217	0	0.24964	0.132326	1.47928	0.193404	0	0.0693591	0.210528	0.0598147	0.0516965	0	0
4930443O20Rik	0.258321	0.0757411	0.381021	0.228007	0.401519	0	0.218976	0.315341	2.09418	0	0.115786	0.15445	0.95893	0.577996
4930444F02Rik	0.771011	1.17777	1.57376	2.14156	1.4749	3.61017	0	3.45307	0	0.326115	0.319637	0.329241	0.937074	0.54756
4930444G20Rik	0.654346	1.56518	0.598592	0.783465	2.05401	1.7066	0.623466	2.17381	0.549765	0.987185	0.327303	0.630034	0	0
4930444M15Rik	0	0.0659137	0	0	0	0	0	0	0.558828	0.4235	0.206352	0	0	0
4930444P10Rik	2.4914	1.48887	1.66336	2.34667	5.33574	3.40546	4.08539	2.9992	1.29628	2.18416	0.383552	0.239847	2.50717	3.78919
4930445N18Rik	0	0	0	0	0	0	0	0	0	0	0	0.050318	0	0
4930447A16Rik	0	0	0	0	0	0	0	0	0	0.635233	0	0	0	0
4930447C04Rik	43.5496	55.3112	51.9832	44.8994	64.9225	55.7251	30.4461	67.8683	6.0916	6.15069	91.2616	66.6623	116.429	118.931
4930447F24Rik	0.0982279	0	0	0	0	0	0	0.912901	1.19474	0	0.218776	0.206051	0	0
4930447J18Rik	0	0	0	0	0	0	0	0	0	0	0	0	0	0
4930447K03Rik	0	0	0	0	0	0	0.23821	0	0	0	0.322054	0	1.50119	1.3647
4930447M23Rik	0	0	0	0	0	0	0	0	0.0604301	0	0	0	0	0
4930447N08Rik	0.802316	1.31	1.01572	0.804783	4.94373	3.42834	0.96616	1.82621	1.68761	0.65161	0.163649	0	0	0
4930448C13Rik	0.964442	0	1.87952	0	0	0	0	0	0	0	0	0	0	0
4930448F12Rik	0	0	0	0.150522	0	0	0	0	0	0	0.145967	0.164609	0	0
4930448H16Rik	0.964164	1.41782	0.283073	0	0	0.319685	0.810444	0	0	0	0.251908	0.661887	0	1.26272
4930448I06Rik	9.81592	8.3361	8.63037	8.85965	23.5971	16.1798	11.465	6.93348	1.48529	2.30936	0	1.05253	0	0
4930448I18Rik	0.450217	0	0.395217	0.595381	0	0	0	0	1.12316	0	0.0618179	0	0	0
4930448K20Rik	0.475933	0.618444	0.855085	0.537927	1.9382	1.2173	0.886941	0.643506	0.396683	0.157577	0	0	0	0.309154
4930449E01Rik	0	0	0	0	0.766333	0	0	0	0	0	0	0	0	0
4930449E18Rik	0	0	0.987369	0	0	0	0	0	0	0	0	0	0	0
4930449I24Rik	0	8.20002e-09	0	0	0	0	0.776508	0	0	0	0	0	0	0
4930451G09Rik	6.24044	5.1368	6.78505	5.51348	8.66559	2.67511	4.89856	6.09451	3.09084	3.16767	3.70001	4.69432	6.38514	3.9579
4930451I11Rik	0.487947	0	0	0	0	0	5.76257	0	0	0	0	0	0	0
4930452A19Rik	0	0	0	0	0	0	0	0	0	0	0	0	0	0
4930452B06Rik	17.6057	28.1848	25.1847	20.2896	39.608	41.4555	25.9829	34.9301	9.65445	7.68914	25.2425	23.7797	39.5643	36.8643
4930452G13Rik	2.14402	4.11069	1.11338	2.54521	0	0	0	1.0751	0	0	0.0343949	0	13.2745	6.73647
4930452N14Rik	0.309936	0	0	0	0	0	0	0	0	0	0.0843063	0	0	0
4930453H23Rik	0	0.247689	0.0620324	0	0	0.13956	0.118995	0	0	0	0	0.0205487	0	0
4930453L07Rik	1.89017	2.12863	3.51313	1.99901	8.13049	3.8101	3.69606	6.97655	1.30319	1.07445	0.047021	0.555878	0	0
4930453N24Rik	52.984	47.6095	37.9343	44.3984	48.8143	47.5979	58.6166	42.4353	32.6213	28.1089	57.4171	58.6579	107.059	89.921
4930455B14Rik	0	0	0.218799	0.434544	0.28919	0	0.525677	1.21642	0	0	0.0679517	0	0	0
4930455C13Rik	1.76619	4.39203	2.83154	3.81512	5.60119	6.57758	5.02785	8.68592	2.74022	1.21768	0.16932	0.442227	3.88397	0.633618
4930455D15Rik	0.300927	0.132157	0.132604	0.130761	1.82734	0.524311	0.255322	3.04407	0	0	0.139798	0.0900794	1.05475	0.609759
4930455F16Rik	0	2.25326	0.461735	0	0	0	1.33126	0	0	0	0	0.153772	0	0
4930455G09Rik	0.603964	0.794952	0.532114	2.34528	0.350733	0.601764	0.769205	0	0	0	1.37284	1.73901	0	0.890552
4930455H04Rik	0	0	0	0.0824278	0	0	0	0	0	0	0.0322962	0	0	0
4930455J16Rik	0.525949	0	0	0	0.4337	0	0.127555	0	0	0	0	0	0	0
4930456L15Rik	0.692577	0.610489	0.405015	0.707393	1.98374	0.797282	0.873001	2.51695	0.295198	0	0.203248	0.328438	0	0.408443
4930459C07Rik	0	0	0	0	0	0	0.556849	0	0	0	0	0	0	0
4930459L07Rik	0	0	0	0	0	0	0	0	0	0	0	0	0	0
4930461G14Rik	0	0	0.182853	0	1.44808	0	0	0	0.241602	0	0.111755	0	0	0
4930463O16Rik	0.195958	2.02531	1.03295	1.19723	1.29638	0.435966	0.24782	1.18941	0.0609924	0.279317	0.0253142	0.0990207	1.31268	1.09976
4930465K10Rik	6.02954	8.34059	7.94487	9.47723	14.8125	9.69	8.61887	15.501	1.81344	3.14159	0.98711	0.949827	5.15083	5.15074
4930465M20Rik	0	0	0	0	2.21493	0	0	0	0	0	0.021864	0	0	0
4930467D21Rik	0.936482	0.345889	0.919732	1.26495	0.547777	2.42607	1.15764	1.31968	0.087351	0.404326	0.772365	0.830984	1.58437	1.16566
4930467E23Rik	0.204864	1.36456	1.07656	0	1.59169	0	1.75351	0.79999	0	0.465659	0.213506	0.546416	2.73714	0
4930467J12Rik	0	0	0	0	0	0	0	0	0	0	0	0	0	0
4930467K11Rik	0	2.22468	0	0.38725	0.79893	0	0.389032	0	0	0	0.564665	0.495219	0	0
4930469K13Rik	1.7141	3.86759	3.25785	2.16611	10.9222	2.21274	1.04186	2.10395	2.27664	0.844258	0.658857	1.51786	0	0
4930470G03Rik	0.536599	0.930518	0.860433	1.2941	3.19104	1.07638	1.49419	1.98172	0.331575	0.33471	0.536738	0.740149	3.35739	1.38418
4930470H14Rik	201.143	186.592	205.398	245.039	437.34	317.29	233.709	431.608	151.884	197.679	25.4612	47.9273	208.266	156.319
4930470O06Rik	0	0	0	0	0	0	0	0	0	0	0	0	0	0
4930470P17Rik	2.39443	0.806808	4.51959	1.28323	2.22591	1.00144	3.32385	3.46262	0.467466	0	1.68146	1.26412	6.42856	2.67792
4930471C04Rik	0	0	0	0	0	0	0	0	0	0.332268	0	0.0509928	0	0
4930471G03Rik	0	1.44633	0.963039	0.947702	0.312826	0	5.31094	0	0	0	0	0	0	0
4930471G24Rik	0	0	0	0.222456	0.292403	0	0	1.23616	0	0	0	0	0	0
4930471M09Rik	1.19459	0	0	0.102198	0	0	0.305947	3.23928	0.305934	0.695979	0.294748	0.190066	0	0
4930473A02Rik	2.26316	1.28505	1.69549	1.95363	6.91086	3.42358	3.51903	4.66988	3.18921	4.75114	0.86444	1.17372	1.05182	1.22182
4930473O22Rik	0.166805	0.219363	0.0734601	1.02584	0.390804	0.249532	0.141437	0.101923	0	0	0.023585	0	1.18767	0.334808
4930474G06Rik	1.32994	1.92639	1.55157	3.1662	3.80589	2.79025	2.31476	3.69517	0.938526	1.56801	0.129565	0.418509	1.17175	1.14324
4930474H20Rik	0.418631	0.64999	0.525196	0.800505	0.613221	0	0.462954	0.836394	0	0	0.023646	0.158231	0	0
4930474M22Rik	8.265	1.68784	8.69485	8.20807	17.7532	6.06638	27.4687	32.0458	1.84421	2.7893	0.162889	0.888142	7.54585	4.73643
4930474N05Rik	0	0	0	0	0	0	1.25354	0	0	0.338363	0	0	0	0.59493
4930474N09Rik	0.342708	0.200933	0	0	0.130734	0	0.575895	0	0	0.210241	0.0295304	0.164181	0.633034	0
4930477N07Rik	13.2795	4.09859	8.11493	10.1111	21.9516	4.56874	6.84076	16.2024	1.45011	5.76615	3.5268	1.36768	3.9104	4.87908
4930478L05Rik	6.49055	6.80576	7.88457	10.524	9.76965	11.1148	8.06701	6.88433	3.56912	6.82545	0.0823451	0.353465	4.94588	3.13325
4930478P22Rik	0	0	0	0	0.065154	0	0	0	0	0	0.0429942	0	0	0
4930479D17Rik	0	0	0.197869	0.592064	0	0.447837	0	0	1.03075	0.782395	1.08568	1.47074	0	0
4930480E11Rik	0	0	0	0	0	0	0	0	0	0	0	0	0	0
4930480G23Rik	0.40297	0	0	0	0	0	0	0	0	0	0.0567898	0.0632902	0	0
4930480K15Rik	1.0112	0.770563	1.62058	0.617143	3.7702	0.459869	0.553171	1.15076	2.29446	2.06225	0	0.317422	7.81311	4.62046
4930480K23Rik	4.5198	4.38651	4.15916	7.39516	10.9255	8.34034	7.12303	12.117	3.4698	4.43633	2.5827	4.61691	7.85444	7.03135
4930480M12Rik	4.94556	3.82898	2.17413	2.14922	6.03494	1.23226	5.5625	1.74495	1.6214	7.5629	0.204303	1.72347	0	1.55918
4930481A15Rik	5.35679	4.78708	4.28099	7.12095	11.9541	6.1167	6.89265	13.9078	3.91721	5.56616	2.71695	4.00205	5.02731	7.13665
4930482G09Rik	0.657679	1.78341	2.57516	1.91709	3.35119	1.35474	0.934731	7.25006	0.230457	2.21875	0.209691	1.59513	4.92957	3.54413
4930483J18Rik	1.63723	2.22943	0.668161	0.871854	1.30412	0.125214	0.752457	0.154036	0.748576	1.36127	0.928288	0.510306	0	0.872641
4930483K19Rik	0.315011	0.465691	0.468228	0.273206	0.481816	0	0.718206	1.17921	0.395458	1.63822	1.3904	1.43924	2.22874	1.41084
4930483O08Rik	2.47174	3.49604	2.29277	1.93097	6.97114	2.31706	2.54126	3.51114	0.789762	0.723254	0.180386	0.402686	0	0
4930484H19Rik	0	0	0	0	0	0	0.403182	0	0	0	0	0.0800478	0.403505	0
4930486F22Rik	0	0.689536	0	1.01784	5.76693	2.72337	0	1.91172	0	1.59185	0	0	0	0
4930486I03Rik	0	0.351665	0.177831	0	0.700975	0	0	0	0	0	0	0	0	0
4930486L24Rik	0.181865	0	0	0.39356	0	0	0	0	0.227415	1.21054	0.898361	10.2555	0.513923	0.95083
4930487D11Rik	0	0	0	0	0	0	0	0	0	0	0	0	0	0
4930487H11Rik	0.67406	0.147445	0.444745	0.28675	0.386677	2.32074	0	0.205483	1.10871	1.67833	0.130341	0.0492332	1.17822	0
4930488B22Rik	0.213572	0.251896	0.314815	0.926124	1.14941	0.425832	0.962596	0.435689	0	0	0	0.406189	0.382108	0
4930488L21Rik	0.465196	0.176545	0.293163	0.116132	0.229293	0.332333	0.112262	0	0	0.13423	0	0	0.713834	1.30943
4930500F04Rik	0	0	0	0	0	0	0	0	0	0.761447	0	0	0	0
4930500G05Rik	0.946221	0.183877	0.556485	0.263912	0.240125	0.62142	0.6186	0.3846	0	0.189472	0.375553	0.129481	0.605105	0.350096
4930500L23Rik	0	0	0	0.60193	0	0.228743	0	0.558068	0.316197	0.972662	0	0	0	0.821712
4930502A04Rik	0	0	0	0	0	0	0	0	0	0	0	0	0	0
4930502E09Rik	2.01572	1.18001	4.13254	1.70503	4.09144	1.74692	3.57797	4.35348	1.70479	3.43635	1.05181	0.843999	1.3602	0.790587
4930502E18Rik	1.75472	3.54541	2.22072	2.61672	0.780839	1.73922	3.82269	2.0635	3.56229	1.66432	19.3844	15.5484	7.86554	5.43312
4930503B20Rik	0.229317	0.844545	0	0.730595	0.962878	0.413669	0.642653	0	0	0.257099	0.462732	0.674847	2.18328	0.80846
4930503E14Rik	3.65518	4.99379	3.5549	2.4148	4.76507	4.03675	2.07358	0.733186	0.293604	1.0247	9.08709	6.463	12.9328	15.7626
4930503E24Rik	0	0	0	0	0	0	0.0819099	0	0	0	0.763169	0	0	0
4930503F20Rik	0	0	0.319125	0	0	0	1.85914	3.81754	0	0	0	0	0	0
4930503H13Rik	0	0	0	0	0	0	0	0	0	0	0	0	0	0
4930503L19Rik	14.8408	14.6749	14.282	13.864	24.6097	30.0018	14.8101	31.2669	8.14035	8.23697	19.0977	19.0791	20.7367	19.091
4930503O07Rik	0	0	0	0	0	0	0	0	0	0	0	0	0	0
4930504C09Rik	2.6132	2.81659	2.7307	3.5743	7.04926	3.56921	2.51401	5.43181	2.1779	3.73815	2.43623	0.312051	2.55487	1.40488
4930504O13Rik	15.4622	10.2447	9.07094	7.21678	5.50432	8.37098	7.16275	3.71406	3.1259	0.692145	10.3641	10.0311	31.0283	5.15989
4930505A04Rik	0.313636	1.79942	1.39381	0.551075	2.02092	1.58192	1.33284	0.774114	0	0.281145	0.209741	0.140617	1.78421	1.05592
4930505G20Rik	0	0	0	0	0	0	0	0	0	0	0	0	0	0
4930505K13Rik	0	0	0	0	0	0	0	0	0	0	0	0	0	0
4930505K14Rik	0	0	0	0	0	0	0	0	0	0	0	0	0	0
4930505N22Rik	0	0.138909	0.277839	0.137595	0	1.28055	1.07639	0.194348	0.871141	0.636627	0.368807	0.34229	0.857604	1.09291
4930506A18Rik	0	0	0.254347	0.253262	0.950352	0	1.09529	0	0.179421	0.273345	0.0734786	0.0402991	0	0
4930506C21Rik	0.45824	2.04347	0.402931	1.32979	10.0861	3.44078	3.46	4.47865	1.8999	0.867899	0.978961	1.54323	0	1.24133
4930507D05Rik	0.313352	1.68124	0.700287	0.416478	0.491861	0	0.403239	1.22589	1.95491	1.15507	1.35535	2.02142	3.47868	2.45716
4930507D10Rik	0.229413	0	0.305837	0	0	0	0.0974276	0	0	0	0	0	0	0
4930509E16Rik	2.44128	2.81139	2.53759	3.4046	7.07252	3.38996	3.75655	4.05337	4.53486	4.84848	2.39203	3.59976	3.93939	2.3088
4930509G22Rik	8.84218	8.83602	9.29583	9.71911	18.869	13.2692	11.6824	17.6616	5.15509	7.56724	3.23455	5.2368	17.3048	13.6521
4930509J09Rik	0.31776	1.03649	0.90538	0.620842	1.01667	0.313734	0.938552	1.92949	0.0975706	0	0.0913282	0.556505	1.11463	0.973223
4930509K18Rik	0	0	0	0	0	0	0	0	0	0	0	0.0402494	0	0
4930511A02Rik	0.420664	0.631493	0	0.42026	0.488223	0.178306	0.152231	0.587833	0.145028	0.219759	0.0334612	0	0	0
4930511A08Rik	2.22215	1.96263	4.88441	5.79415	6.31323	9.96627	3.74903	2.72067	1.45706	0	0.275078	0.309757	8.0609	9.86486
4930511E03Rik	0	0	0.0461133	0	0	0	0	0	0	0	0	0	0	0
4930511M06Rik	21.7414	17.8885	18.5971	25.4597	54.8917	34.0944	35.1031	50.8316	23.5356	32.9341	13.9367	17.0679	152.845	122.715
4930512B01Rik	3.51811	3.33275	6.56192	3.98639	7.82059	5.3714	3.88199	8.32237	1.99747	1.13075	0.286581	0.445908	3.58951	3.86685
4930512J16Rik	0.0629636	0	0	0	0	0	0	0	1.96413	1.67538	0.0164404	0.0366927	0	0
4930512M02Rik	17.0059	15.0084	14.5609	19.1916	36.6189	33.0234	25.4052	35.7601	21.0327	30.3183	3.11713	5.53283	75.917	38.8987
4930513D17Rik	0	0	0	0	0	0	0.366046	0	0	0	0	0	0	0
4930513N10Rik	4.60419	4.28319	4.56141	3.23076	3.10812	2.6921	3.39488	1.85805	2.2209	2.49658	2.71492	4.21637	5.68591	6.82609
4930513O06Rik	0	0	0	0	0.454278	0	3.47068	0	0	0	0	0	0	0
4930515B02Rik	0	0.621521	1.23742	2.14069	0.799704	1.02734	2.37447	1.29236	0	0	0	0	0	0
4930515G01Rik	1.61647	0.567059	0.379735	1.97687	1.11933	0.107507	0.36467	3.57038	2.04826	2.43562	1.77748	2.09011	1.09972	1.64845
4930515G16Rik	0	0	0	0	0	0	0	0	0	0	0	0	0	0
4930515L03Rik	0	0	0	0	0	0	0	0	0	0	0	0	0	0
4930515L19Rik	0	0.361103	0	0	0	0	0	0	0	0	0	0	0	0
4930517E11Rik	0	0	0	0.0741959	0	0	0	0	0	0.156072	0	0	0	0.326338
4930517M08Rik	5.42347	2.58483	1.94179	3.35085	0.168245	1.74359	0	0.540025	0.368747	0	0	0	0.780776	1.88182
4930518J21Rik	0	0	0	0.656271	0	0	0	0	0	0	0	0.210507	0	0
4930518P08Rik	2.87278	0.304087	1.41734	0.808293	4.35845	0.911843	0.874026	0.841726	0	0	0.500943	0.758148	1.76242	1.79882
4930519D14Rik	0.237108	0	0	0	0	0	0	0	0	0	0	0	0	0
4930519F16Rik	0	0	0.738671	0.306063	0	0.118442	0	0	1.45132	0.223761	0.134309	0.113092	0.75097	0.882065
4930519F24Rik	0.744206	0	0	0	0	0	0	0	0	0	0	0	0	0
4930519G04Rik	2.14754	1.07694	1.59146	0.891984	2.65058	1.68665	1.66284	2.49507	2.02831	3.28389	0.323184	0.709476	0	0.518404
4930519H02Rik	2.49463	2.33323	4.02864	2.69683	9.05152	4.99348	5.36828	4.69013	0.900519	1.90079	0.0401047	0.441757	1.87369	0.543589
4930519K11Rik	0	0	0	0	0	0	0	0	0	0	0	0.322228	0	0
4930519L02Rik	31.8221	33.0037	29.6089	42.0081	76.5124	57.8049	40.939	71.2659	57.785	72.3225	5.53531	13.7251	66.1496	62.5073
4930520O04Rik	2.42858	4.57049	2.0398	4.95522	2.77032	1.04535	2.16282	1.3956	1.38609	2.85282	3.48451	4.19924	2.11732	3.80296
4930520P13Rik	1.50647	6.20917	2.20754	3.49161	7.41862	7.00673	5.50681	0	2.63412	6.14332	0	0.419991	0	0
4930521E06Rik	0	0	0	0	0	0	0	0	0.203653	0	0	0	0	0
4930521O11Rik	26.9195	23.6278	24.3781	36.4823	59.7213	38.342	24.8176	55.6824	20.9483	23.5197	1.39675	4.99167	11.5022	6.06885
4930521O17Rik	0	0	0.471247	0	0	0	0	0	0	0	0.132698	0.149427	0	0
4930522H14Rik	0.352127	0.616912	0	0.153551	0	0	0.747332	0	0	0	0	0	0	0
4930522O17Rik	0	0	0	0	0	0	0	0	0	0	0	0	0	0
4930522P08Rik	9.37709	4.14098	10.3057	4.07506	7.99224	14.0187	7.91013	0	0	0	8.12547	13.7248	0	0
4930523C07Rik	0.107094	0.35304	0.731805	0.571674	0.449508	1.90456	0.792069	2.33782	1.66235	2.09971	0.232458	1.63829	0	0
4930523O13Rik	0.0971804	0	0	0.0850082	0	0	1.06732	0.355553	0	0	0.0555672	0	0	0
4930524B15Rik	0.059019	0.725905	0.887439	0.71422	0.479545	1.6501	0.903091	0	0.667255	1.23278	5.02015	5.9404	0.3788	1.71885
4930524B17Rik	6.83086	4.59679	5.43945	5.03795	11.0002	9.93649	5.06312	11.0984	2.5778	2.6913	0.0539168	0.372854	3.15806	1.79447
4930524C18Rik	0	0	0.0549406	0	0	0	0	0	0	0	0	0	0	0
4930524N10Rik	0	0	0	0	0	0	0	0	0	0	0	0	0	0
4930524O05Rik	0.343602	0	0	0	0	1.05562	0	0	0	1.22096	0	0	1.37371	0
4930524O08Rik	0.934847	1.4999	1.35406	1.33869	4.15212	0.93694	0.792803	1.56227	0.207775	0.156803	0.0454344	0.127058	0.902191	0.561304
4930525C09Rik	1.85829	1.09418	0.470693	1.15222	3.69338	0	6.30214	1.51679	0	0	0.153357	0	0	0
4930525D18Rik	2.01733	0.68153	0.683499	2.0513	0.902042	0.616714	0.131967	0	2.00743	0	1.00872	1.11938	2.57999	0.528325
4930525G20Rik	1.13145	1.05451	0.867033	0.943836	2.3616	1.62544	2.18773	0.58105	1.16534	0.543344	0.289359	0.49365	1.92182	0.420904
4930526H09Rik	0	0	0	0	0	0	0	0	0	0	0	0	0	0
4930526I15Rik	1.95305	1.86333	0.578952	1.66637	4.93978	2.32951	0.291937	2.91991	3.41945	6.60772	6.76273	8.75309	8.11275	10.3388
4930526L06Rik	9.99622	10.4423	9.77502	10.283	16.9055	10.5535	4.96651	14.1147	5.63817	4.26663	0.372263	2.22998	0	0.438139
4930527F14Rik	0.231503	0.203394	0	0.202394	1.07723	0	0.196094	0	1.91532	0	0	0.284778	0	0.866139
4930527G23Rik	0	0	0.29525	0	0	0	0	0	0	0	0	0	0	0
4930528A17Rik	3.36213	2.79043	3.46726	3.866	3.49735	7.56068	3.3223	5.49967	1.77033	1.49675	1.61568	2.41407	5.72699	4.13681
4930528D03Rik	9.53942	7.48782	8.969	10.2766	22.3283	16.809	10.91	13.6989	8.05198	7.86321	1.42237	3.02983	16.3251	16.7279
4930528G23Rik	0	0	0	0	0	0	0	0	0	0	0	0	0	0
4930528H21Rik	0.499733	0.44137	0	0.868687	1.13582	0	0.421554	0	0	0	0	0	0	0
4930528P14Rik	0	0	0	0	0	0	0	0	0	0	0	0	0	0
4930529C04Rik	0.808301	0.923599	0.950253	1.20207	1.92813	1.3948	1.6227	1.37216	0.347792	0.389944	0.0508848	0.238284	1.1273	1.56696
4930529K09Rik	0	0.270156	0	0	0	0	0	0	0.396245	0.591872	0	0	0	0
4930529L06Rik	0	0	0	0	0	0	0	0	0	0	0	0	0	0
4930529N20Rik	1.56248	2.76	0	1.35803	1.77564	1.55727	11.8624	13.391	0	0	0	0	0	0
4930532I03Rik	4.32123	3.51965	4.93859	4.42452	14.4028	8.24651	9.34216	10.3965	0.660848	2.02099	0.429703	0.476805	2.16473	0
4930532M18Rik	0	0	0	0	0	0	0	0	0	0	0	0	0	0
4930533B01Rik	1.22725	0.119975	0.120647	0.356728	10.5526	3.64703	1.94736	5.31073	0.470572	0	0	0	0.74509	0.943428
4930533N22Rik	13.3247	8.0234	9.59141	14.6697	35.644	23.3142	20.7705	30.7505	13.7747	18.0754	3.22809	6.32435	38.6443	18.1613
4930533P14Rik	0	0	0	0	0	0	0	0	0	0	0	0	0	0
4930534H03Rik	0	0	0	0	0	0	0.461338	0	0	0	0	0	0	0
4930539C22Rik	0	0	0	0	0	0	0	0	0	0	0	0	0	0
4930539E08Rik	7.61612	6.28355	7.62082	7.51321	13.4907	12.3594	10.3032	7.5202	3.72176	4.442	2.91182	3.45515	10.0291	10.1853
4930539J05Rik	14.7078	9.95907	12.0693	4.6872	12.8142	13.1927	8.68481	15.6064	9.00092	9.99624	6.55437	4.6471	57.6994	39.6362
4930539M17Rik	0.540866	0	0	0	0	0	0	0	0	0	0.0967548	1.16232	0	0
4930539N22Rik	1.00795	0.110605	0.110955	0.973075	0	0	0.213553	0.307137	0	0.232704	0.0686475	0.224215	0	0
4930540M03Rik	0	0	0	0	0	0	0	0	0	0	0	0	0	0
4930542C21Rik	0	0.134172	0	0	0	0	0.902694	0	0.186574	0	0.200632	0.224148	0	0
4930542D17Rik	0.401197	0.166493	0.0903882	0.57714	0	0.187758	0.83051	0	0	0	0.0244113	0	0.55365	0.329916
4930542M03Rik	1.3119	0.285839	1.70772	1.4474	1.49	2.55527	5.17819	0.80731	1.58627	2.02825	0.167567	0.454452	0	0
4930543E12Rik	1.06778	0.0777835	0.0784089	0	0.924503	4.31955	0.525025	0.863552	0	0.669379	0.373197	0.233932	0.499166	0.931241
4930543N07Rik	0	0	0	0	0	0	0	0	0	0	0	0	0	0
4930544D05Rik	0	0.262168	0	0	0	3.24818	0	0	0	0	0	0	0	0
4930544G11Rik	0.338585	0.523832	0.0750708	0.35922	0	0.927091	1.64927	0.623473	0	0	0.181122	0.0254694	0.480006	0.28137
4930544M13Rik	0	0	0	0.157148	0	0	0	0.32789	0	0	0.0232681	0	0	0.31334
4930545E07Rik	0	0	0	0	0	0	0	0	0	0	0	0	0	0
4930545H06Rik	6.55648	1.52563	5.36893	3.78755	7.32004	4.78356	2.5844	6.73408	1.34847	2.5195	0	0.438597	5.32683	1.55624
4930545L23Rik	0.0449576	0.273439	0.0393169	0	0.360404	0	0.187484	0	0	0.0815114	0	0	0	0.163086
4930546C10Rik	0	0	0	0	0	0	0	3.18285	0	0	0	0	0	0
4930546K05Rik	1.14922	0.961935	0.867009	1.27149	2.31614	1.45339	1.23958	1.58661	1.83721	1.63664	0.100883	0.150671	0.984693	0.297021
4930547E08Rik	1.28237	0.755071	0.37583	1.11457	0.971542	5.11235	3.96644	3.66347	0.560564	0	1.05829	0.953368	2.60694	0
4930547E14Rik	2.0689	2.55818	0.727607	3.23672	7.52363	7.83553	3.83951	19.7576	1.08525	2.53105	0.307327	0.115358	5.03013	3.132
4930548G14Rik	0.108728	1.33344	2.69514	0.843746	1.25557	1.93037	0.828661	0.263727	0.252933	0	0	0.035258	0	0
4930548H24Rik	0.706611	0.0776665	0.0777238	0.386685	0.408463	0	0.375319	0	0.440464	0	0.410467	0.40262	0	0.845821
4930548J01Rik	0.491805	1.8061	0.201764	0.404752	1.08489	0	1.74654	0.844729	0.295225	1.34089	0	0.281471	0	0
4930548K13Rik	0	0	0	0	0	0	0	0	0	0	0	0	0	0
4930549C15Rik	0.516149	0.72631	0.821679	0.34802	0.587577	0.606655	1.47837	3.64776	0.47734	1.28172	0	0.0315059	0.589847	1.04372
4930549G23Rik	4.95355	4.37115	4.49843	6.40582	8.63581	22.7789	6.58072	19.0327	0	3.53872	6.7867	5.6587	5.88013	6.08498
4930550C14Rik	3.34879	1.64438	2.11445	0.361367	7.71859	1.54793	4.23898	2.54027	3.75631	5.55432	0.891742	1.17908	5.26653	1.51459
4930550C17Rik	0	0	0	0	0	0	0	0	0	0	0	0	0	0
4930550L24Rik	9.2941	12.0883	10.9276	8.68668	7.20038	17.8296	12.6972	13.1783	8.33904	7.27023	76.0088	98.7	67.8188	66.2461
4930552N02Rik	0	0	0	0	0	0	0.0965132	0	0	0	0	0	0	0
4930552P12Rik	1.18674	0.725269	0.523446	1.08089	2.06094	5.63263	0.580994	1.677	0.171797	0.348922	0.727839	0.977537	2.68705	3.11116
4930553C11Rik	2.98114	1.88233	1.30707	1.84751	3.41183	3.60805	4.87133	6.74931	0.81518	2.08823	0.156248	0.180243	2.42681	2.24166
4930553E22Rik	0	0	0	0	0	0	0	0	0	0	0	0	0	0
4930553J12Rik	0	0	0	0	0	0	0.512033	0	0	0	0	0	0	0
4930553P18Rik	0.380934	0.765933	0.43076	1.18933	0.698367	1.24748	0.187582	0.490996	0.989017	0.133652	0.222344	0.35413	2.6871	1.98642
4930554C24Rik	0	0	0	0	0	0	0	0	0	0	0	0	0	0
4930554G24Rik	0.3025	0.99362	0.731446	1.05409	2.7234	0.901302	1.60094	3.13992	0.091418	0.699526	0.0206362	0.206506	1.38474	0.53382
4930554H23Rik	0.0879477	0.503143	0.971026	0.876012	0.96449	1.43998	1.11221	1.01845	0.210411	0.080456	0.0356037	0.722491	0.264773	0
4930554I06Rik	1.03445	0	0	0.599394	1.17557	0	0.290872	0	0	0	0.170738	0.192263	1.72769	0
4930555B11Rik	0	0	0	0	0	0	0	0	0	0	0.0223666	0	0	0
4930555B12Rik	0	0	0	0	0	0	0	0	0	0	0	0	0	0
4930555G01Rik	0.259141	0.115986	0.45891	0.0989802	0	0.0561323	0.240292	0.13867	0.574838	1.17616	1.11694	0.332332	0.466923	0.323462
4930555G21Rik	0	0	0	0	0	0	0	0	0	0	0	0	0	0
4930555K05Rik	0	0	0	0	0	0	0	0	0	0	0	0	0	0
4930555K19Rik	0	0	0	0	0.247835	0	0	0.0885418	0	0	0	0	0	0
4930556C24Rik	1.96935	0.43201	0.289084	0.717755	0	0	0	0	0	0.856413	0.404357	0.10016	5.84253	2.24237
4930556G01Rik	0	0.144535	0	0	0	0	0	0	0	0	0	0	0	0
4930556J02Rik	0.817163	0.237008	0	0	0	0	1.59945	0	0	0	0	0	0	0
4930556L07Rik	0.0771147	0.191824	0	0.126218	0.0890993	0	0	0	0	0	0.0391946	0.0220481	0	0.543145
4930556M19Rik	9.51714	8.35014	8.37236	8.62786	13.2206	10.8745	9.64897	15.3686	5.73029	7.26303	4.07625	4.22037	15.0079	11.2194
4930556N09Rik	0.13709	0	0	0	0	0	0	0	0	0	0	0	0	0
4930556N13Rik	7.55513	7.2743	6.4054	9.2093	17.3259	4.35142	13.3411	14.2057	1.85587	3.65683	0.686809	1.65951	3.42117	6.17164
4930557F10Rik	0	0	0	0	0	0	6.44542	0	0	0	0.0742973	0.172004	0	0
4930557J02Rik	0.379801	0.553956	0.224083	0	0	0.248775	0	0	1.18239	0.459468	0	0	0.735653	0
4930557K07Rik	2.70418	2.38837	5.94394	2.35034	16.902	8.08544	5.70284	9.93252	12.4119	2.75687	1.67374	12.4393	20.5013	0
4930558C23Rik	1.3429	0.587939	0	0	2.09829	0	8.32954	0	0	0	0	0	0	0.837372
4930558F17Rik	0.203822	0.534198	1.07801	0.354753	2.81796	2.85105	1.72449	0.997635	0	0	0	0.306975	0	0
4930558G05Rik	0	0.319453	0.31801	1.25747	0	0.343614	0	0	0	1.1971	0	0	0	0
4930558J18Rik	4.17592	4.9475	4.96347	4.90829	7.25068	11.3251	5.90409	4.68454	4.07969	2.73294	7.0802	7.06318	4.47603	4.91772
4930558K02Rik	3.68364	1.7115	0.981798	2.12795	10.3319	0.553671	2.05484	2.91491	0.172495	0	0.704583	0.475659	1.58043	1.44965
4930559C10Rik	0	0	0	0	0	0	0	0	0	0	0	0	0	0
4930562C15Rik	0.309671	0.199121	0.923046	0.925457	1.46279	0.47878	0.981158	1.48179	1.55608	2.04092	0.235612	0.655411	0.834622	0.602675
4930562F07Rik	0	0	0.255073	0	0	0	0.213154	0	0	0	0.368439	0.903978	0	0.717141
4930563E18Rik	3.64777	4.61191	3.89032	3.4151	5.02198	7.34207	2.99733	2.60625	2.98175	1.81435	0.965548	0.990154	6.3389	3.7609
4930563E22Rik	5.05823	3.16053	3.76347	4.70506	6.42368	6.17417	3.51327	2.87189	0.599508	0.921421	6.58641	4.86703	13.3399	8.23435
4930563F08Rik	6.22584	7.19065	8.84244	13.3199	9.79638	19.5697	8.48377	12.8997	0.62804	9.76485	0	0	8.87441	11.0342
4930563H07Rik	0	0	0	0	0	0	0	0	0	0	0	0	0	0
4930563J15Rik	2.25476	0.361571	1.26506	0.624558	1.02097	0.271578	1.15959	0.502196	1.48444	0.509116	0.107623	0.572513	0.803794	1.45988
4930563M20Rik	5.19221	4.93857	10.1837	9.02563	19.0632	14.3304	14.4875	12.7141	2.61886	3.25747	2.17542	5.56744	7.25748	7.53387
4930563M21Rik	1.41533	2.84841	1.9675	2.58891	8.12363	5.8418	3.9534	1.98228	0.983577	0.743658	0.757594	0.672751	1.26141	0
4930564C03Rik	1.02064	1.10167	0	1.78906	2.09461	1.24744	1.64187	0.418035	1.74327	0.894202	0	0	0.66588	1.98989
4930564D02Rik	1.12612	0	0.801569	0.200455	0.26257	1.13047	0	2.21088	0	0	0	0	0	0
4930565D16Rik	0	0	0	0	0	0	0	0	0	0	0	0	0	0
4930565N06Rik	30.4793	31.3052	30.3123	21.7081	59.8807	42.5034	35.0935	37.8166	13.0572	13.5719	5.90051	9.27871	22.476	22.4835
4930567H12Rik	0.153997	0	0.136689	0	0	0	0.648982	0	0	0	0	0.0900303	0	0.520067
4930567H17Rik	0	0	0	0	0	0	0	0	0	0	0	0	0	0
4930567J20Rik	0	0	0	0	0	0	0	0	0	0	0	0	0	0
4930567K12Rik	0	0	0	0	1.50717	0	0	0	0.121415	0	0	0	0	0
4930567K20Rik	0	3.15046	1.25449	0	0	0.711027	0	0	0	0	0	0	0	0
4930568D16Rik	0	0.0929811	0	0	0	0	0	0	0	0	0	0	0	0
4930568E12Rik	0.804308	1.57961	1.06348	0.522251	0	1.79764	0.677324	0.738177	0.476049	0	0.0573362	0.187604	0	1.5014
4930568G15Rik	0.438592	0.128806	0.517269	0	0	3.20309	0.37137	0	0	0.81135	0.111678	0	0	0
4930570G19Rik	3.1932	0.930747	3.06775	3.74202	6.37123	3.45538	3.57034	12.6766	0.378027	0.500288	0.43432	1.53288	0.230845	2.53986
4930571K23Rik	0.267949	0.237108	0	0	0	1.97555	0.589228	0	0	0	0	0	0	0
4930571O06Rik	3.67124	6.65323	4.78422	3.28095	11.4551	13.6467	5.29072	5.48612	4.71864	1.8785	0.266479	0.497646	6.38444	4.71028
4930572K03Rik	0.306399	0.134919	0	2.9838	0	0.308471	0.131201	0.565433	0	0	0	0	0	0
4930572O03Rik	0.733595	0.475755	0	1.45856	2.70676	1.37842	0.459519	2.62827	0	0	0	0.287796	0	0
4930572O13Rik	1.47954	0	1.67527	0	0	0.210278	0	0	0	0	0	0.124888	0	0
4930573H18Rik	0.70366	0.175203	0.846935	1.28607	1.41113	1.22737	1.51785	1.53269	0.482172	0.328101	0.0863392	0.186493	0	0
4930573O16Rik	0	0	0	0	0	0	0	0	0	0	0	0	0	0
4930577N17Rik	2.01602	0.934243	1.5849	2.72574	2.91864	1.38576	3.39995	3.5436	2.49654	3.75544	2.08121	3.93491	7.80154	7.20062
4930578C19Rik	0.0307055	0.189024	0.0541831	0.173322	0.214511	0	0.0260152	0.0374718	0.879106	0.334133	0.0158301	0.0890853	0.172987	0
4930578E11Rik	5.0396	4.00273	4.31385	4.09504	9.26862	5.42408	5.98485	7.95996	3.85735	4.50752	0.541341	1.38028	5.91828	4.3045
4930578G10Rik	0	0	1.42854	0.919008	0	0	0.808769	2.38141	10.589	11.0683	1.55081	4.49533	0	0
4930578I06Rik	1.36773	0.726422	0.242313	0	0	0	0.806731	0	0.168418	0	0.0351031	0	0	0
4930578L24Rik	4.71313	3.89653	3.1463	4.6629	5.0787	5.18161	4.37053	9.27182	1.39454	2.78673	4.54905	3.67331	5.5301	5.11469
4930578M01Rik	0.342462	0.214508	0	0.151424	0.830663	0.387756	1.02356	1.52277	0	0.543628	0	0.36832	6.12056	2.28745
4930578N18Rik	0	0	0	0	0	0	0	0	0	0	0	0	0	0
4930579D09Rik	0	0	0	0	0	0	0	0	0	0	0	0	0	0
4930579F01Rik	0.534398	0.74692	0.268992	0.400761	0.265399	0.457674	2.15094	0	1.25525	0.295366	0.0388315	0.0661798	0.453505	0
4930579G18Rik	19.4648	11.894	14.9669	13.6645	25.1454	17.5407	15.3422	25.2306	10.1094	13.8501	4.05519	8.28657	11.2814	9.96399
4930579G24Rik	14.8702	12.1471	16.5429	13.9149	25.7469	18.1897	22.9782	14.5732	16.1873	13.2587	33.516	26.5985	20.9948	21.3788
4930579H20Rik	0	0.280986	0.211999	0.352372	0.282239	0	0.136503	0.19837	1.18327	1.03984	0.0224839	0	0	0
4930579J19Rik	0.180007	0	0	0	0	0	0	0	0	1.02065	0	0	1.02683	1.24482
4930579K19Rik	6.89882	4.54059	7.32276	6.89684	4.60496	3.02484	5.68687	2.41524	0.900503	2.05775	6.69409	5.32975	14.7828	6.37288
4930579P08Rik	0	0	0	0	0	0	0	0	0	0	0	0	0	0
4930581F22Rik	2.18874	1.76672	2.19228	1.77381	2.305	1.42312	4.60693	1.45378	0.834063	1.89823	0.937394	2.19401	3.24526	3.29788
4930583I09Rik	0	0	0	0	0	0	0	0	0	0	0	0	0	0
4930583K01Rik	0.168961	0.444985	0	1.19338	0.991125	0.506211	0.143833	0.41618	0.847976	0	0.317274	0.201768	0	1.21342
4930583P06Rik	0	0.387389	0	0.376859	0.770503	0	0.745008	4.07044	0	0	0	0.208058	0	0
4930584F24Rik	0	0.191558	0.384403	0.191902	0.382114	0	2.03	0	0	0	0	0	0	0
4930586N03Rik	0	0	0	0	0.199428	0	0.442772	0	0	0.333535	0	0.15021	0	0
4930587E11Rik	0.362549	0	0	0.439705	1.02978	2.13303	1.22692	0	0.645984	0	0.103626	0	1.03912	0
4930589L23Rik	1.58166	1.38964	0.164537	1.89153	0.324144	2.50298	0.0786272	0	0.842483	1.47567	0.798621	0.379832	1.19108	2.90546
4930590A17Rik	0	0	0	0	0	0	0	0	0	0	0	0	0	0
4930590J08Rik	0.191863	0.987439	0.622999	0.0559134	0.521016	0.578294	2.27765	0.784552	0.563718	0.673274	0.0569919	0.045633	0	0
4930590L20Rik	35.3026	22.8409	16.2412	19.623	22.3917	11.0464	16.9675	21.5698	2.15328	2.51096	0.441598	2.63217	4.98622	0
4930591A17Rik	7.2742	5.36809	7.44867	8.22932	15.1527	18.9312	13.528	6.31486	0.292201	0	0.870012	0.842591	10.8873	9.759
4930591E09Rik	0	0	0	0	0	0	0	0	0	0	0	0	0	0
4930592A05Rik	0	0	0	0.238708	0.160378	0	0	0	0.587382	0.934041	0	0	0	0
4930592C13Rik	0.829179	0	0.24552	1.20085	0	0	0.465084	0.340669	2.4395	0	2.21148	1.97042	1.50407	0.87609
4930592I03Rik	0.746632	0.260226	0.520176	0.918398	0	0.148444	0.877179	0.181476	0	0.835983	0	0.125801	1.60967	1.92055
4930593A02Rik	0.157917	0	0.698882	0.270276	0.180455	0	0	0	0.408308	0	0.123277	0	1.0289	0.614636
4930593C16Rik	5.09939	2.25192	4.16324	8.54769	8.69257	7.62352	7.68149	9.36507	1.433	2.22804	0.180356	0.507736	0	0
4930594C11Rik	3.958	2.63961	3.88609	2.99201	10.3279	4.84512	6.03437	8.03934	1.27906	1.39295	0.584028	0.375401	5.19357	4.00521
4930594M22Rik	7.68139	7.0584	7.92685	5.85311	9.71181	8.05749	8.64624	10.4118	3.14782	3.47138	4.08228	4.12616	10.6892	9.38896
4930594O21Rik	0	0.234234	0.233835	0.11564	0	1.05248	0.983352	1.10557	1.26977	0	0	0.148798	0	0.382061
4930595D18Rik	1.53989	0.342241	2.05468	1.19	3.80437	0.969486	3.61825	1.17989	0.725219	0	0.0490353	0	5.73813	1.15459
4930595M18Rik	0	0	0	0	0	0	0.105839	0	0	0	0	0.0935928	0	0
4930596D02Rik	0.685553	0.302496	0	0	1.7112	0	0.675932	0	0	0	0	0	0	0
4930596I21Rik	10.2802	5.10728	15.8175	12.2857	38.6988	12.8073	15.718	34.6129	2.52777	9.17047	0.318145	2.32864	4.13711	0
4930597A21Rik	0	0	0	0	0	0	0	0	0	0.432534	0	0	0	0
4930597G03Rik	0.466027	0.921983	1.44068	1.43159	7.06613	5.00852	2.96069	8.27303	0.137424	0	0	0.250826	0	0
4930598F16Rik	0	0	0	0	0	0	0	0	0	0	0	0	0	0
4930599N23Rik	2.88083	2.71609	1.45571	2.80601	6.13181	0.564116	1.97235	0.516774	2.29463	1.21884	3.991	5.4838	15.3952	3.39656
4931402G19Rik	1.38375	1.73912	2.49973	2.36293	6.57105	2.03322	4.40456	5.74884	2.87014	1.72335	0.282757	1.83685	0.930324	2.41536
4931403E22Rik	2.69026	0.238079	1.66399	0	5.92098	0.53206	2.4915	3.92339	0.71374	0	0.420629	1.17695	1.67413	0.996647
4931403G20Rik	0.818113	1.71529	1.77774	1.10349	3.43931	3.3216	1.17382	0.614303	1.53486	0.805349	0.0568658	0.134154	2.66954	2.79034
4931406B18Rik	2.01248	1.10911	1.09808	2.18474	3.09278	1.45592	2.6842	2.10613	1.58479	1.54684	0.425796	0.602343	3.37982	2.26394
4931406C07Rik	24.7782	18.323	18.6223	21.4993	25.2747	25.6529	20.2984	30.8075	74.6755	75.2128	28.0459	36.1968	17.4376	18.9504
4931406H21Rik	2.21419	0.744613	1.60209	1.66481	4.74162	1.88934	3.42233	5.86756	3.8222	5.37868	0.101345	0.301758	2.33537	2.23053
4931406P16Rik	55.083	45.5543	51.1891	49.4416	66.5696	49.0104	43.626	57.724	54.8707	40.2056	88.9789	109.77	52.7717	51.8702
4931408C20Rik	0.0245894	0	0.108351	0.0214568	0.14217	0.902376	0.0207621	0.569211	0	0	0.0130778	0.0145682	0.273865	0.166038
4931408D14Rik	1.17632	1.81925	1.15924	1.27172	2.51234	3.80436	1.30465	3.23395	0.654619	0.872718	0.389603	0.577853	1.14396	0.584099
4931409K22Rik	0.299321	0.0377269	0.156118	0.0373827	0.591496	0.897133	0.145192	0	0.344407	0.322711	0.736265	0.489988	0	0.257966
4931414P19Rik	3.54054	2.54332	2.11009	2.54626	2.55189	3.50265	2.84562	1.19412	2.80803	2.00315	11.8689	11.865	10.1655	8.8419
4931417E11Rik	0	0.211857	0.319873	0	0	0	2.14411	0	0	0	0	0	0	0
4931419H13Rik	0	1.69584	0	0.131627	0.342744	0	0.748854	0	0	0	0.221361	0.167348	0	0
4931420L22Rik	8.80909	3.21849	4.34176	5.43149	9.05725	6.7526	7.55608	6.45741	0.260834	4.06379	0.16438	1.59661	5.8352	2.51667
4931422A03Rik	3.59603	2.91961	2.91612	3.68935	10.5499	9.64261	3.68803	6.33414	0.531957	0.80415	0.127131	0.878522	4.57579	2.87733
4931423N10Rik	0	0	0.112906	0.222334	0.220888	0	0	0.389544	0.156617	1.06434	0.0867036	0.0192785	0	0
4931428F04Rik	18.3282	11.8847	12.5733	10.3689	11.6978	28.864	8.21806	18.5772	4.87275	11.6232	19.9202	21.4503	30.3051	33.1495
4931428L18Rik	26.5712	25.6734	25.6559	27.0146	73.2392	50.5708	38.0773	66.3435	11.6828	15.2231	2.59325	4.74543	9.13391	1.87351
4931429L15Rik	0.294288	0.208636	0.371223	0.632293	1.10492	0.297648	0.362631	0.220239	0.146069	0.794632	0.19711	0.134487	0.600843	0.750925
4931429P17Rik	0	0	0	0	0	0	0	0	0	0	0	0	0	0
4931430N09Rik	1.95555	1.67459	1.16384	2.67638	11.5897	3.03966	3.88978	7.64161	1.82132	1.42022	0	0.0681037	3.00636	1.35927
4931431B13Rik	0	0	0	0	0	0	1.00301	0	0	0	0	0	0	0
4931431C16Rik	0.25973	0.470867	0.302786	0.380251	0.685416	0.0919908	0.328055	0.363797	1.11189	0.729963	0.101467	0.098376	0.733588	0.316122
4931440F15Rik	0.514919	0.246986	0.280758	0.659512	0.0410703	0.182453	0.235052	0.8625	0.100084	0.378477	0.131574	0.255617	1.53744	0.440363
4931440J10Rik	0	0.150499	0.151165	0.150866	0	0	0.578956	0	0.209686	0	0.177422	0.405163	0	2.2399
4931440P22Rik	2.29715	2.6878	1.45503	1.75294	2.24963	2.68175	3.20043	3.9667	0.872496	0.65512	1.59694	3.12584	9.79616	8.40676
4932411N23Rik	0.637096	0.278126	0.611747	0.555099	1.04448	0.861461	0.710636	0.708332	0.286516	0.543876	0.082157	0.138023	0.500194	0.197518
4932412D23Rik	0.483535	0.045009	0.181388	0.884056	0.683214	0.0844767	0.643754	0.833641	0.0611781	0.373625	0.67753	0.290378	0.677087	0.688422
4932413F04Rik	0.434742	0.625004	0.523116	0.406305	1.78165	0.234823	2.14214	1.54713	0.591776	0.15034	0.0544203	0.0983287	3.60025	2.70829
4932414J04Rik	0	0	0.0943919	0.0623536	0.0823838	0	0.30181	0.0432145	0	0	0	0	0	0
4932414N04Rik	1.51254	0.995257	1.05012	1.21739	2.16254	1.15035	1.91784	2.24043	0.880894	0.447732	0.0796911	0.274953	1.08861	0.422967
4932415M13Rik	0.107657	0.125755	0.0946796	0.061745	0.164602	0	1.6031	0.0434019	0	0	0.01935	0.0107911	0.20369	0
4932429P05Rik	0	0	0	0	0	0	0	0	0	0	0	0	0	0
4932435O22Rik	1.33688	1.76778	4.49988	1.89615	3.92944	1.92773	1.00746	1.44212	0.62503	0.177568	0.373256	0.482208	6.2637	5.55902
4932438A13Rik	88.9321	83.4354	96.2487	96.736	262.215	185.145	163.317	218.251	36.9732	33.1936	82.8866	86.9996	156.362	129.321
4932438H23Rik	0	0	0.743031	0.488105	0.107388	0	0.078858	0	0.568079	1.38074	0.0545685	0.0276176	0.225384	0.265423
4932441J04Rik	0	0	0	0	0	0	0	0	0	0	0	0.507258	0	0
4932702P03Rik	0.199833	0.459332	0	0	1.55143	0	0.32145	0	8.58163	9.56633	0	0.281372	0	0
4933400A11Rik	0	0	0	0	0	1.43838	0	0	0	0	0	0	0	0
4933400B14Rik	0	0	0	0	0	0	0	0	0	0	0	0	0	0
4933400C23Rik	0	0	0	0	0	0	0	0	0.421334	0.905231	0	0	0	0
4933400F21Rik	5.42287	3.62119	4.13714	4.53839	10.8875	5.91808	6.18337	10.4077	1.65583	2.69171	0.0400262	0.107831	7.31825	4.93936
4933400L20Rik	0	0	0	0	0	1.03799	0	0	0	0	0	0	0	0
4933401B06Rik	0.107402	0	0	0	0	0	0	0	0	0	0.0281965	0	0	0
4933401D09Rik	1.49422	1.91938	4.4377	2.76794	6.4366	5.89034	2.28043	3.89442	3.09959	4.5676	0.612283	2.08124	3.33674	4.55925
4933401H06Rik	0	0	0.685018	0.409521	0.180857	3.43044	0.660015	0	0	0	0	0	0	0
4933402C06Rik	0	0	0	0	0	0	0	0	0	0	0	0	0	0
4933402D24Rik	0	0.236611	0	0.178088	0.313641	0.604828	0.171134	0.329189	0.578962	0.874132	0.0363686	0.101959	0	0
4933402E13Rik	0	0.590208	0.107672	0	0.211254	0	0	0	2.01846	2.14578	2.57614	36.0211	1.52139	1.213
4933402J07Rik	1.50076	1.67655	2.2835	0.695549	3.56876	7.48486	8.26266	0	0.862047	0.25884	0.563041	0.776143	3.54693	2.60864
4933402J10Rik	1.51237	0.395354	0.132875	0	4.3792	0.449878	0.509598	0.18463	0	0	0	0	0	0
4933402J15Rik	0	0	0	0	0.0824742	0.21208	0	0	0	0	0.0197696	0	0	0
4933402N03Rik	0	0	0	0	0	0	0.493004	0	0	0	0	0	0	0
4933402N22Rik	0.107106	0.380565	0.342797	0.184291	1.37838	0.738072	0.929314	0	0	0	0	0	0	0
4933403O08Rik	15.1733	21.1045	19.2486	12.0562	9.48928	15.4421	11.6998	13.2477	3.15011	5.10207	6.76474	7.57299	23.2935	13.481
4933404G15Rik	0	0	0	0	0	0	0.26142	0	0	0	0	0	0	0
4933404K08Rik	8.71235	6.82755	7.20165	9.62578	12.7336	10.4503	8.53749	19.5172	3.57769	5.11667	0.450961	4.25149	5.43517	3.1323
4933404K13Rik	3.38378	0.997677	1.66302	0.331796	0.217497	0.374868	1.43316	0.914908	0.92315	0	0.427884	0.416373	1.05601	0.670934
4933404O12Rik	6.91981	3.53341	5.5398	5.6189	8.26025	8.45503	5.33544	6.32693	7.07093	7.18122	4.14795	4.35464	4.18462	4.82357
4933405D12Rik	5.50739	2.37092	1.89803	3.30833	5.67512	5.29398	3.04373	4.92977	2.2204	3.39454	2.03578	2.45113	2.75513	5.99777
4933405E24Rik	0	0	0	0	0	0	0	0	0.159528	0	0	0	0	0
4933405L10Rik	0.805428	0.59289	0.507827	0.98008	0.132753	0	0.758139	0	0.447764	1.82238	1.00398	0.83544	1.12572	0
4933405O20Rik	0.289419	0	0.0847437	0	0.444303	0	1.30221	0.234015	0	0	0	0	0	0
4933406C10Rik	2.1707	2.17903	1.45577	1.02484	7.88773	3.40465	3.98457	3.39175	0.841562	0.571562	1.07239	1.04865	2.1579	5.42612
4933406D12Rik	0	0	0	0	0	0	0	0	0	0	0	0	0	0
4933406F09Rik	0.0984977	0.954427	1.04677	0.344564	0.458787	0.395033	0.66964	0	0.950257	0.362969	0.0823248	0.185571	0	0
4933406G16Rik	0	0.308427	0	0	0	0	0.0738392	0	0	0	0	0	0	0
4933406I18Rik	2.26198	1.19015	0.833258	0.455968	3.08755	0.133279	0.453626	1.80905	0.165912	0.505744	0.986607	1.11387	0	0
4933406J09Rik	0	0	0.0723336	0.721049	0.0950768	0	0.138598	0	0	0	0.0860398	0.048013	0	0.288476
4933406J10Rik	4.13445	1.69073	2.33455	1.16034	4.72687	2.49865	5.98626	9.56552	1.69331	2.86277	0.0714908	0.122133	0	1.93443
4933406K04Rik	0.369867	0	1.14721	0.482966	4.83455	1.2983	3.14379	1.58932	0	0	0.0999263	0.4733	0.564225	1.35004
4933406M09Rik	2.12125	2.81717	3.96119	2.49798	6.91886	2.57988	1.33105	2.75938	0	1.18445	0.383529	0.313365	5.62643	4.61023
4933407E24Rik	0	0.11712	0.116852	0.173382	0.606595	0	0.449674	0.0811097	0.0806992	0	0	0	0.319031	1.5962
4933407G14Rik	8.07276	3.88425	5.16611	6.38446	14.8552	8.47734	3.44801	9.96227	2.51146	3.2587	0.174192	1.4175	1.85038	1.42078
4933407I05Rik	0	0	0	0	0	0	0	0	4.4387	1.58068	0	0	0	0
4933407K13Rik	3.57617	4.18426	3.80315	4.3953	5.74727	7.14957	1.4741	7.57071	2.83661	4.89783	4.78965	5.75566	3.41757	3.3036
4933407L21Rik	0.241415	0	1.80123	0.210893	3.84994	0	0.706414	4.81461	0	0.672185	0.0307403	0.101459	1.93975	0
4933408B17Rik	0.758425	1.29272	2.28921	2.01624	3.4415	2.14864	2.09274	6.04165	1.15908	1.28465	0.676917	1.5192	0	0.978416
4933408J17Rik	1.91261	1.63103	0.898372	2.17219	1.40204	0.634915	1.18587	0.622464	0.662856	0.879047	1.52636	1.16225	2.45991	1.27043
4933408N05Rik	20.9147	18.9133	21.0714	22.5432	66.5612	35.2156	31.9362	45.3481	13.1422	12.4503	1.86634	5.58077	11.1772	7.41921
4933409F18Rik	0	0	0	0	0	0	0.0858608	0	0	0	0	0.0968191	0	0
4933409G03Rik	0.664176	2.25271	5.601	1.93882	1.08631	0.653917	0.481842	1.61723	0	0	0	0	0	1.28833
4933409K07Rik	11.0486	7.86878	10.4556	10.2804	20.4887	10.402	8.56232	16.8501	31.7879	41.3256	5.10493	10.5186	27.1769	20.392
4933411E08Rik	1.72202	1.27126	1.1119	2.7111	2.54774	1.57387	1.98113	2.05952	0.751166	1.10398	0.112465	0.193884	1.29193	0.784992
4933411G06Rik	0.546222	0	0	0	0	0	1.5089	0	0	0	0	0	0	0
4933411K16Rik	0.828779	2.52127	1.14007	0.559803	0.423577	1.09649	1.63576	0.111723	0	0.178717	0.0679466	0.0753432	0	0.256167
4933412E12Rik	27.8205	20.0253	30.2212	19.4853	42.3097	35.8647	27.0824	40.4956	2.17807	2.1734	8.49423	7.39365	32.5258	25.6424
4933412E24Rik	0.814175	0.776383	0.777611	1.19066	0.787646	2.03502	0.404278	0.41497	0.432996	0.264864	1.41468	1.04691	3.56536	1.99927
4933412O06Rik	0.120842	0	0	0	0.552011	0	0.204727	0	0.3069	0	0	0	0	0
4933413J09Rik	1.83405	1.52643	1.58468	2.16571	2.94935	3.03083	2.23477	4.53294	5.44173	8.02784	0.55755	3.00918	0.779545	0.706724
4933413L06Rik	2.77404	3.36369	3.46629	3.90987	9.78003	6.82947	5.57554	11.0838	0.368564	0.550886	0.320386	0.495629	6.274	11.1612
4933415F23Rik	1.15431	0.239076	0.54106	0.35375	1.02582	2.83416	0.860855	0.663496	0.0863103	0	1.14242	1.23316	0.378028	0.538032
4933416C03Rik	8.14874	7.6464	8.09442	6.54543	10.1508	12.708	6.71781	10.9165	4.94148	2.50687	26.2678	22.5679	17.6438	17.8731
4933416E03Rik	0	0	0	0	0.13775	0	0.200661	0	0	0	0	0	0	0
4933416I08Rik	0	0	0	0	0.478488	0	0	0	0	0.559201	0	0.36005	0	0
4933416M06Rik	0	0	0	0	0.116561	0.200139	0	0.123915	0	0	0	0	0	0
4933416M07Rik	6.81151	4.47127	3.99889	2.68901	4.66403	5.77324	3.95358	7.63495	2.57019	1.4563	8.23657	6.83919	8.57071	9.29857
4933416O17Rik	0	0	0.142799	0	0	0	0	0.656135	0	0	0	0	0	0
4933417A18Rik	0.132069	0	0.233036	0	0.152542	1.57483	0.223662	0	0	0.267593	0	0	0	0
4933417D19Rik	1.0808	0.670059	0.576662	1.33312	0.75083	0.538779	3.29926	1.83712	1.38598	1.05403	2.57744	2.47701	1.49509	1.52497
4933417E11Rik	0.126785	0	0	0	1.30641	0	0	0	0	0	0.168635	0.0378383	0.716373	0.445133
4933417G07Rik	0	0.803293	0.133894	2.25669	2.10239	2.41435	1.6681	1.66123	0.917936	1.6942	0	0	1.54278	0.930468
4933417O13Rik	0.321747	0	0.0716301	0.205717	0.184764	0	0.613203	0	0	0	0.02159	0.0244664	0.431019	0.508464
4933421I07Rik	0	0	0.0819423	0.159707	0	0	0.0784673	0	0	0	0.0419521	0.136324	0	0
4933421O10Rik	11.3944	8.35831	8.53206	10.5021	22.7432	13.4027	13.8406	16.8567	6.76959	11.4357	1.98135	4.37463	8.91579	7.48781
4933422A05Rik	0.185801	0	0	0.0798364	0.642133	0.644987	0	0	0	0	0.0985919	0.138141	0.514339	0.612367
4933424G05Rik	0.339443	0.360558	0.36053	0.464985	0.391819	0.471401	0.287761	0	0.582306	1.78962	0.405906	0.205336	0	0.239943
4933424G06Rik	0.120937	0.532772	0.106855	0.103379	0	0	0.204473	0.592973	0	0.463387	0.185292	0.102885	0.69684	0
4933424L21Rik	0.222994	0.882933	0.789421	1.07472	0.516087	0	0.949336	0.686101	0.27412	0	0.0843511	0	0.63196	1.53852
4933425B07Rik	0	0.0531302	0.106605	0	0	0.240754	0	0	0	0	0.0325408	0	0	0
4933425L06Rik	11.1716	9.72823	6.00533	6.98968	10.6267	7.65266	10.6273	4.56811	2.71203	1.72548	7.23298	6.52011	21.7269	16.0367
4933427D06Rik	48.3774	46.3757	38.7763	46.6799	54.6945	44.1581	30.8052	48.2058	46.1741	41.347	92.2445	75.4298	40.0354	39.9329
4933427D14Rik	6.92368	7.09745	7.70128	7.65558	10.1791	8.87043	10.8294	8.71866	4.08167	4.6845	9.95183	10.3596	20.234	15.1905
4933427E11Rik	1.85561	1.24924	0.576413	0.848424	4.81534	2.09435	0.6474	0.539127	0.875967	0.219631	1.34947	1.32017	1.20783	1.45794
4933427E13Rik	0	0	0	0	0	0	0	0	0	0	0.0216801	0	0	0
4933427I22Rik	0.839213	0.246037	0.329916	1.83859	2.49874	0	0.788158	1.02161	0	0	0	0.0528876	0.518213	0
4933428C19Rik	0.191102	0	0	0	0	0	0.649413	0	0	0	0	0.170182	0	1.30011
4933428G20Rik	3.99436	5.13499	4.62614	1.6141	1.58949	1.20887	3.68393	5.39019	4.19336	4.09649	0.728959	1.23312	0.484	1.54693
4933428M09Rik	0.970271	0.608482	0.243243	0.85124	0.478837	0.555704	0.467787	2.03723	0	0.268723	2.65816	2.20762	3.5724	3.40869
4933429K18Rik	0	0	0.250964	0	0	0	0	0	0.169095	0	0.105784	0.0385146	0	0
4933429O19Rik	0.93994	0.543312	0.263205	1.07972	0.852581	0.197461	1.16672	2.16897	0	0.423732	0.0393319	0.207844	0	0
4933430H16Rik	1.52807	2.61115	1.35537	1.74729	3.25033	3.54457	2.09445	5.0989	0.533462	0.161627	1.51082	1.09841	5.74643	4.58617
4933430I17Rik	2.58174	1.81869	2.31504	2.7857	2.14189	1.61918	3.25908	6.08572	2.63492	2.33851	5.89604	4.48382	4.23603	4.92628
4933430M04Rik	0	0	0	0	0	0.21575	0	0	0	0	0	0	3.17859	0.927231
4933430N04Rik	0	0.202704	0	0	0	0	0	0	0	0	0	0	0	0
4933431E20Rik	16.8431	12.4107	14.4454	13.1139	17.8308	11.2985	13.3823	12.4217	9.09505	7.79886	11.132	13.835	16.7725	14.741
4933431G14Rik	2.83473	1.95196	8.18754	7.56695	21.3013	5.59115	5.89241	11.7818	6.08257	3.1925	0.36914	0.784048	3.43964	2.71954
4933432G23Rik	0.542382	0.317988	0.159123	0.154066	1.46092	2.14857	0.918059	1.99309	0	0	0.0492001	0.164905	0	0
4933432I03Rik	0	0.564879	0	0.904809	5.07784	0.383824	0	0	0.156088	0.238533	0.141584	0.119857	0	0
4933432I09Rik	0	0	0.085505	0.249164	0.109749	0	1.30708	0	1.04779	1.62471	0.170466	0.106754	0.427431	0.603784
4933432K03Rik	5.09806	1.20094	5.95766	3.29351	22.4857	16.7932	16.2492	10.8597	1.32081	1.32783	0.51565	0.967765	1.76171	3.16634
4933433F19Rik	0	0.552048	0	0	0	0	0.212577	0	0	0	0	0	0	0
4933433G08Rik	0	0	0	0	0.299553	0	0	0	0.236983	0	0	0	0	0
4933433G15Rik	9.63134	5.38406	8.72532	4.4182	4.87041	1.18494	5.99384	10.5988	4.48338	3.46746	4.93381	6.57349	8.88373	6.3176
4933433G19Rik	0.782964	0.917927	1.49906	2.39319	1.52689	2.47692	1.32636	1.76756	2.64527	2.74603	0.257303	0.917922	0.655154	0.79243
4933433H22Rik	0	0	0	0	0	0	0	0	0	0	0	0.0191171	0	0
4933434E20Rik	80.5531	63.7724	66.5825	67.3432	144.232	91.7159	134.681	112.258	37.8382	36.0637	94.3955	97.8268	173.218	131.907
4933436E23Rik	0	0	0	0	0	0	0	0	0	0	0	0	0	0
4933436H12Rik	0	0	0	0	0	0	0	0	0	0	0	0	0	0
4933436I01Rik	0	0	0.077278	0	0	0	0.148608	0	0	0	0	0	0	0
4933438B17Rik	0.228452	0.90846	0	0.202249	0.133052	0	0.774557	0.278475	0.965445	0.625501	0.210281	0.202834	0	0
4933438K21Rik	19.4368	20.9872	23.1027	21.7687	40.4562	23.0073	27.8732	28.5607	10.3357	10.6798	5.1112	13.646	13.9702	11.4992
4933439C10Rik	1.84916	3.15161	3.27862	1.06385	3.55613	3.16933	1.51849	2.27049	3.01076	4.42648	5.03088	6.9712	3.51019	2.07117
4933439K11Rik	0	0.137705	0.277096	0.277529	1.26813	0	1.58362	0	0	0	0.473793	0.265967	0	1.0054
4933440J02Rik	4.20511	3.79874	2.78615	4.4018	10.3056	2.30411	3.7397	3.82915	0.130722	1.02008	0.406564	0.113113	3.62717	1.73183
4933440M02Rik	0.997781	0.878151	0.377831	0.682126	1.15226	0	0	0	0	0.127018	0.187085	0.125105	0.360188	0.427052
5031410I06Rik	12.1319	11.4445	9.9094	10.3958	0.928486	4.25624	2.17318	6.37219	119.155	166.549	0.76464	1.52811	36.1145	35.0919
5031425E22Rik	4.04417	2.5653	2.88193	3.13866	8.07969	5.82247	3.65656	2.17347	4.17437	6.72068	10.171	11.4533	12.7974	10.3782
5031425F14Rik	0.221772	0.196973	0.196758	0.711668	1.28026	0	0.81943	0	0.0941242	0	0.0553647	0.103896	1.16305	0.474373
5031426D15Rik	7.02139	6.70697	6.99717	6.87002	13.0631	9.92568	10.326	8.69953	6.07921	7.033	0.431924	0.732966	5.13748	3.01087
5031434C07Rik	1.70979	0.825451	1.27377	1.2129	4.07385	2.37057	2.10856	2.77553	0.868821	0.511755	0.202936	0.145402	1.26329	1.88935
5031434O11Rik	15.5545	20.3696	18.7413	15.2001	12.8865	16.5216	7.55912	10.2949	2.4082	0	1.41291	0.891249	5.65908	4.06886
5031439G07Rik	10.1457	8.75597	10.8561	11.1355	7.93543	8.94281	8.58725	8.46339	14.7402	12.8235	25.3575	28.7169	16.4135	17.6276
5033403F01Rik	6.43557	4.24656	5.64676	4.66074	5.50199	4.17532	3.5401	6.23645	1.25116	1.93158	3.22351	2.57654	2.66142	3.15862
5033403H07Rik	0	0	0	0	1.30618	0	0	0	0.753648	0	0	0	0	0
5033404E19Rik	0	0	0.215687	0	0	0.483091	0	0	0	0	0	0.0735788	0	0
5033406O09Rik	1.49392	2.44374	1.12665	1.31543	2.29557	0.705447	2.51042	3.71882	5.6038	5.97446	0.557423	1.40698	2.38912	1.20755
5033417F24Rik	0	0	0	0.0579432	0.0775403	0	0	0	0.622492	1.14238	0.553122	0.762004	0	0
5033428I22Rik	0	0.137384	0	0.134359	0	0	0	0	0	0	0	0	0	0
5330411J11Rik	0	0	0.0651405	0.129331	0.256836	0	0	0	0	0	0.0951592	0.043199	0	0
5330413P13Rik	0	0.0531049	0.0532672	0.18447	0.0695902	0.092473	0.331771	0.257997	0.0355548	0	0	0.0620299	0.171075	0
5330416C01Rik	0	0	0	0.028923	0	0	0	0	0	0	0.104143	0.214154	0.375982	0.992169
5330417C22Rik	2.66341	3.41462	3.00761	2.87086	3.00339	1.84647	2.15181	1.71678	1.38006	0.729568	2.21898	2.51873	2.93124	2.63694
5330434G04Rik	0.498506	0.518839	0.302282	0.743631	2.54392	1.23184	0.893685	0.457336	0	0.113175	0.0264888	0.0788285	0	0.234637
5330439B14Rik	0	0	0	0	0.105238	0	0	0	0.543622	0.493388	0	0	0	0
5430401F13Rik	0	0	0	0	0	0	0	0	0	0	0	0	0	0
5430402E10Rik	0	0.173618	0	0	0	0	0	0	0	0	0.107701	0	0	0
5430402O13Rik	2.59195	5.21992	2.50629	3.49916	7.06157	1.55451	3.54691	5.00816	2.72286	0.593842	4.55508	5.09737	7.50237	11.4609
5430403N17Rik	0	0	0.389847	0.0389111	0	0	0	0	0.109525	0	0	0	0	0
5430405H02Rik	21.2241	19.6203	20.0513	26.1015	25.054	25.5191	26.3393	31.4682	18.6521	19.7886	14.1943	14.6351	27.3126	21.5411
5430416N02Rik	46.2556	45.4959	32.3991	42.3013	27.8072	53.6067	47.2239	28.3027	12.215	17.4679	28.628	26.0145	53.6271	53.5117
5430419D17Rik	0	0	0.135147	0	0	0	0	0	0	0	0.00965762	0.0432533	0	0
5430421F17Rik	1.77723	1.36412	2.64905	1.87924	5.77052	1.83031	2.38537	3.48206	1.89966	1.86007	1.85552	0.674345	4.13283	3.79954
5430425K12Rik	0	0	0	0.0888617	0	0	0	0	0	0	0	0	0	0
5430427M07Rik	1.82729	0.868522	0.373367	0.822876	2.39893	1.79622	2.36772	2.59294	0.811891	1.77477	0.205293	0.0825761	3.38037	1.53608
5430427O19Rik	0.989874	1.23291	1.35943	1.15223	3.23714	1.36706	1.65326	3.27053	0.901592	0.456831	0.0538767	0.552745	1.47805	0.427502
5430428K19Rik	4.25204	1.14894	2.45901	4.39736	5.44283	3.95045	3.61226	9.47506	0.188466	2.57426	0.137062	1.79391	3.82988	1.66786
5430431A17Rik	2.33791	0.559294	1.85514	0.549747	1.20608	0	0.17868	0	1.32107	0	0.753503	1.10735	1.27651	0.779536
5430434I15Rik	0	0	0	0	0	0	0	0	0	0	0	0	0	0
5430437J10Rik	5.75673	9.82475	11.5201	9.80766	24.7551	12.1927	12.6829	22.0072	1.79565	0.825615	0.774943	2.92278	3.85022	5.43852
5430440P10Rik	0.523016	2.20448	0.83276	1.5463	9.24006	1.53467	1.3668	2.18795	1.34979	0.417131	0.576133	0.4813	0	1.14354
5530400C23Rik	0	0	0	0	0	0	0	0	0	0	0	0	0	0
5530401A14Rik	0	0	0	0	0	0	0.107002	0	0	0	0	0	0	0.19376
5530601H04Rik	23.7178	23.4301	21.9304	22.4027	50.1489	36.6976	27.9364	34.5443	7.53357	7.68955	6.49801	9.10025	10.3978	12.2109
5730403I07Rik	9.66165	9.68309	8.80734	10.849	24.72	14.6912	14.1745	16.1271	10.4436	15.6788	1.21804	1.65092	3.61102	3.25286
5730405O15Rik	0.857767	0.599755	2.09967	0.892365	1.78452	1.02155	0	0.420435	0.424948	0	0.496897	0.769541	1.02099	1.82965
5730408K05Rik	4.74442	8.38066	5.83996	1.64945	2.15666	6.61999	14.4079	1.16175	1.24436	3.86949	9.86674	4.49717	19.8681	8.13454
5730409E04Rik	2.71408	4.09447	2.97843	2.65146	3.34785	2.82524	3.61639	3.22462	10.9691	17.2522	4.04203	6.8541	6.64628	8.96943
5730412P04Rik	0	0.18984	0	0	0	0	0	0	0	0	0.0273311	0	0.575477	0
5730416F02Rik	0	0.172411	0.692406	0	0.227582	0	0.166364	0	0	0.737352	0	0.055433	0	0
5730420D15Rik	0.345881	0.794906	0.102333	0	0.803417	0	0	0	0	0	0.120844	0.444756	0	0
5730422E09Rik	0.981635	0.988023	1.78956	1.96223	3.73263	2.6402	2.79136	2.4748	0.266103	0.947456	0.413828	1.26512	2.92794	2.80328
5730435O14Rik	0.321341	1.41199	0.283296	0.556419	18.7214	0	0	6.67144	1.60813	2.48806	0.0779914	0.0858609	0	0
5730455P16Rik	6.39407	7.16923	7.30346	7.50789	9.96482	10.2392	8.40597	8.27998	17.1473	13.2178	14.2808	15.0701	15.5875	11.003
5730460C07Rik	2.05005	0.997081	1.00342	1.00805	1.55346	1.0351	0.839241	0.818535	0.996308	0.46329	0.182782	0.359275	0.751114	0.699122
5730480H06Rik	1.96931	1.95265	2.20752	2.15125	5.62604	1.4838	4.41683	4.96945	0.739106	2.37921	2.01433	2.91807	6.57677	3.43758
5730488B01Rik	0	0	0	0	0	0	0.044018	0	0	0	0	0.0261785	0	0
5730507C01Rik	30.8758	29.8356	31.2349	28.2727	67.9571	64.5495	42.7261	62.1082	35.4408	27.8615	65.5337	91.9483	58.2296	55.609
5730522E02Rik	0	0.502212	0.144349	0.069067	0.469401	4.36029	0.0689499	1.00202	0.502644	0	0.305515	0.196487	0.524287	0
5830408C22Rik	0	0	0	0	0	0	0	0	0	0	0	0.52564	0	0
5830411N06Rik	0	0	0	0	0	0	0	0	0	0	0.0098189	0.0221355	0	0
5830416I19Rik	9.62733	6.13696	8.22238	10.5934	16.0452	13.9295	14.6815	9.88217	1.49352	1.31507	0.129053	0.558862	8.64585	10.7132
5830417I10Rik	32.1347	29.1018	30.2901	36.104	53.3189	41.9933	45.8773	49.3419	33.4508	33.0577	31.6507	43.3125	37.7871	34.6695
5830418P13Rik	0.274031	0.289917	0.578274	0.284943	0.438346	0.325473	0	0.466498	0.130452	0.100428	0.0552391	0.0919947	0	0
5830428M24Rik	0.135474	0	0	0	0	0	0	2.63991	0	0	0.0356704	0.0397197	0	0.456513
5830432E09Rik	0	0	0	0.45158	0	0	0	0	0	0.484429	0	0.187666	0	0
5830444B04Rik	7.47071	5.24801	3.43571	3.97326	4.99236	1.41138	2.22021	3.29671	2.87424	5.17195	0.835604	0.774156	3.53522	2.29988
5830454E08Rik	0.931942	4.13365	3.71595	1.01526	2.68506	4.41346	7.87205	0.8493	16.4143	13.3552	9.67615	6.89103	4.33206	2.09684
5830473C10Rik	0.714258	0.360002	1.709	0.805438	0.651414	0.919668	0.173488	0	0	0.300235	0.0264525	0.0147373	1.90661	0.662971
5930403L14Rik	4.16774	3.55296	5.62605	3.50004	6.80229	6.515	11.7538	4.21468	4.09211	4.3546	1.96328	2.58085	7.20247	6.18529
5930412G12Rik	2.39103	1.85809	2.40288	2.25726	4.07613	6.38546	3.67619	2.56922	1.17031	0.799977	1.85835	2.41388	2.39569	2.07311
5930430L01Rik	17.727	17.4453	20.4175	19.1982	33.961	20.6876	17.0523	27.6512	8.31195	10.6237	1.7895	3.04787	15.9943	9.7051
5930438M14Rik	0.0462332	0.0404775	0.0408321	0.0392531	0.0531046	0	0	0	0	0	0.0127513	0.0143009	0	0.166071
6030407O03Rik	0.532509	0.0588526	0.881651	0.0584895	3.86451	0	0	0.409106	0.334725	0.380206	0.0341395	0.0954937	1.07938	0
6030408B16Rik	8.68819	6.16297	6.06957	6.83462	16.811	11.2943	10.0197	14.6414	35.3728	37.2465	2.01841	10.7308	8.97167	5.45539
6030440G07Rik	16.7948	21.2497	18.5129	20.0676	37.9356	22.627	19.178	39.3404	10.6985	10.7828	6.2346	3.74523	13.3372	18.7284
6030443J06Rik	9.27804	6.10477	7.18946	8.6645	18.2628	9.84315	9.99876	14.5419	4.5093	4.24895	1.26014	3.02825	10.1859	6.74401
6030458C11Rik	27.3069	18.0354	19.0942	19.8411	58.2636	36.0039	45.4635	60.3467	19.7757	18.4129	35.1525	41.8932	56.0554	53.8745
6030466F02Rik	0	0	0	0	0	0	0	0	0	0	0.0218921	0.122824	0	0
6030468B19Rik	0.53227	0.496907	0.12067	1.09252	0.454286	0.132151	1.01423	0	0.338783	0.560428	0.188796	0.260911	0.683825	0.853355
6030469F06Rik	0	0	0	0	0	0	0	0	3.38153	2.74172	0	0.299089	0	0
6030471H07Rik	0	0	0	0	0	0	0	0	6.35891	2.19709	0.133388	0	0	0
6030498E09Rik	0	0	0.880466	0	0	0	0	0	0.965793	0.211322	0.0303771	1.13903	0	0
6230400D17Rik	9.35505	8.00153	6.63469	6.21996	8.09652	15.1782	10.4882	4.819	3.04543	3.0956	4.13751	5.91072	5.62296	9.67573
6330403K07Rik	10.9535	6.39674	7.61391	9.52967	10.7227	1.72695	8.91088	10.218	8.76351	5.30776	2.97057	4.89605	4.81779	8.19637
6330407A03Rik	1.09184	1.28932	0.78857	0.83263	1.92497	1.65512	1.24554	0.941879	0.982227	0.470553	0.0177588	0.443239	0.841564	0
6330409D20Rik	2.57497	1.73042	1.19504	3.46162	4.69847	1.96905	0.939653	1.20325	0.448252	2.5364	1.42604	0.897625	0.639373	2.02403
6330410L21Rik	1.71536	1.82694	2.49371	2.37548	6.24566	5.06285	2.35763	4.8897	1.20014	1.44908	0.0563672	0.84871	1.15357	0.488054
6330415B21Rik	1.56824	1.05119	0.90092	0.567066	2.02824	1.56303	0.974875	1.35212	3.10316	3.5167	0.0731992	0.711713	1.77738	2.51392
6330415G19Rik	2.10107	1.02576	3.0569	2.20605	1.45823	0.15337	1.30302	1.10848	0.769324	3.30537	3.99859	4.76842	5.6101	8.04497
6330418K02Rik	1.35978	2.14536	2.3839	2.36761	3.60272	2.99881	6.97478	1.55175	1.61215	2.6613	5.68319	5.40069	2.49777	6.00889
6330549D23Rik	5.46628	4.41233	5.89217	3.53692	7.7975	7.48156	6.45785	6.90596	5.23913	7.86854	4.51804	3.5428	7.27964	6.58088
6430411K18Rik	0	0	0	0	0	0	0	0	0	0	0	0.135984	1.29755	0
6430503K07Rik	0	1.01892	0.338107	2.00541	0	0	0	0	0	0	0.0952068	0	0	0
6430531B16Rik	0	0.344447	0.619331	0	0	1.42592	0.219382	1.34059	5.01842	5.15245	0.0640311	0.608034	0.711013	0.798577
6430548M08Rik	2.48229	1.75427	1.41868	2.7667	1.38874	1.63947	1.15239	1.91336	4.15026	4.65916	9.62335	10.5863	5.03012	5.33368
6430550D23Rik	4.14698	4.1924	4.69059	4.39596	5.01399	12.8606	3.97581	4.42227	4.11594	1.75222	3.50861	4.51786	3.06221	2.89922
6430553K19Rik	2.64857	1.57766	2.9888	2.13467	5.64789	3.21192	4.87174	5.26013	1.12947	0.541194	0	0.28832	2.11778	0.627521
6430562O15Rik	0.213744	0	0.44222	0.307603	0.740288	0.141445	0.0597262	0.777664	0.895331	0.680463	0.927264	1.82418	4.09056	1.73744
6430571L13Rik	2.01602	2.5787	1.71314	1.5724	3.78909	1.69656	3.61508	2.98153	1.67246	1.04469	2.50873	3.05479	3.26954	3.29516
6430584L05Rik	0	0	0.0305187	0	0.280612	0	0	0	0.125576	0	0.0370439	0.206011	0	0.230546
6430628N08Rik	0	0	0	0	0	0	0	0	0.317409	0	0.183168	0.147596	0	0
6430706D22Rik	32.6208	27.001	28.14	24.7888	64.9488	48.2656	54.0453	44.6012	26.2467	33.94	218.74	187.53	109.733	114.65
6430710C18Rik	5.78354	8.37074	7.86756	7.58862	3.11429	6.08901	3.53904	4.7613	0.388027	0	0.854565	0.530453	14.5	10.1299
6530402F18Rik	0.101165	0	0	0.19957	0	0	0.0214129	0.061695	1.5364	1.60445	0.553472	1.04043	0	0.0802954
6530403H02Rik	25.0462	19.3261	23.99	25.5607	68.0027	41.9662	41.0726	55.9561	22.7666	24.1517	2.89694	10.4358	33.4582	30.2527
6530411M01Rik	0	0.0948173	0	0	0	0	0.817381	0.131551	0	0	0.0825819	0.123208	0	0
6720468P15Rik	2.64283	5.33123	3.52164	2.90319	5.19045	4.34948	5.14336	1.82928	0.594737	1.44924	0.740752	0.385221	4.96182	6.35011
6720483E21Rik	0.488683	0.860211	0.758205	0.53667	0	1.71896	2.17576	0	0.316043	0.485997	0.186411	0.248757	0.696724	0.422782
6720489N17Rik	7.71735	6.6278	5.42445	6.54437	16.5721	13.3337	10.4667	16.0794	14.5717	10.3131	9.80565	13.0337	6.8416	7.09193
6820408C15Rik	1.58294	0.318156	0.382453	0.462978	0.087477	0	0.984674	0	1.40167	0.539441	4.34967	3.78411	1.11583	0.457768
6820426E19Rik	0	0	0	0	0	0	0	0	0	0	0	0	0	0
6820431F20Rik	69.1262	18.7225	20.1556	17.1134	99.1486	29.6614	19.6986	32.1047	137.149	133.581	65.9566	107.991	59.948	54.2185
7420426K07Rik	0.252637	0.148095	0	0	0.194256	0	0.213879	0	0	1.08777	0.326357	0.29381	0	0.250093
7420700N18Rik	1.28836	2.45494	1.17391	3.68328	7.6135	2.99044	2.54292	5.86843	0.841431	1.50507	0.273679	0.489252	1.27936	0.74278
7420701I03Rik	0	0.408718	0.617422	0.616046	3.76714	0	0.590619	0	0	0	0	0	0	0
7530416G11Rik	0.595986	0.558925	0.979889	1.35452	3.33451	2.67798	1.15757	2.91452	1.83984	1.80549	0.0661896	0.708741	3.78603	1.97478
7630403G23Rik	0	0	0.447685	0	0.440955	0.251878	0	0	0	0	0.0346674	0	0	0
8030411F24Rik	0	0	0	0	0	0	0	0	4.40804	1.83927	2.28375	31.2273	0	0
8030423F21Rik	5.73485	5.23305	3.83988	5.77594	10.3611	8.76391	7.9849	12.9563	4.21554	6.92881	1.63996	1.33984	3.12929	3.01174
8030423J24Rik	0	0	0	0	0	0	0	0	0	0	0	0.657161	0	0
8030442B05Rik	0.288765	0.883661	0.390523	0.513539	1.02658	1.87769	0.975833	1.08415	0.15932	0	0	0.245088	0	0
8030443G20Rik	0	0	0	0	0	0	0	0	0	0	0.0432315	0	0.856678	0
8030451O07Rik	0	0	0	0	0	0	0	0	0	0	0	0	0	0
8030455M16Rik	17.5179	7.95173	10.5046	9.3465	22.7989	11.5315	9.69393	16.6497	2.29355	0.953317	1.86911	5.01622	7.65776	8.31654
8030462N17Rik	8.17605	7.81859	9.55708	9.76923	14.3682	13.1621	14.4682	12.9325	23.153	20.524	20.3647	30.1084	15.1421	17.1023
8030474K03Rik	92.1839	70.1796	74.5007	82.7998	102.978	144.253	78.1504	109.932	34.5362	26.9357	175.908	158.022	114.44	121.861
8430422H06Rik	2.14526	0.721146	2.05716	1.87669	3.92744	0.907219	1.45347	1.6395	0.610229	0.549108	0.109916	0.0314347	0.610228	1.09021
8430423G03Rik	0	1.9613	0	0.278655	0	0	0	0	0	0	0	0	0	0
8430426J06Rik	0	0.16305	0	0.653362	2.72914	2.45221	0.158484	0	0	0	0.169767	0.534221	0	0.862135
8430429K09Rik	15.0973	17.2985	15.0064	13.5646	23.1314	44.5413	14.0813	20.5597	27.0396	23.4048	10.9307	10.0456	16.1768	11.1391
8430430B14Rik	0.689631	0	0.606339	2.39758	7.8371	0	6.98093	0	0	0	2.04885	0.384525	0	2.77992
8430431K14Rik	0.226242	0.834667	0.525219	1.09649	1.34969	0.939242	0.548681	2.82176	1.39501	1.11112	0.0264124	0.0612246	0.637416	0.588851
8430436N08Rik	0	0	0	0	0	0	0.106675	0	0	0	0	0	0	0
8430437L04Rik	0.734656	0.838143	0.452231	0.128545	0	0	0	0	0	0	0.0565395	0.105398	0.832444	0.505557
9030025P20Rik	32.0891	35.415	27.4387	37.6533	53.3758	78.7668	40.803	56.2889	9.75411	15.7876	12.3661	14.0652	22.789	13.2835
9030204H09Rik	1.36997	0.240879	1.45219	0.708745	1.27293	0.541433	1.85151	0.331709	0.977412	0.502198	0.238588	0.803467	0	0.986021
9030404E10Rik	1.11582	0.485452	1.65954	1.55031	1.53075	0.552078	1.40793	3.10197	1.36126	1.03997	0.141645	0.0953269	1.23278	0.725506
9030612E09Rik	1.21694	0.714454	1.25131	0.99053	5.55318	1.45554	2.46397	3.29389	1.82558	1.90684	1.35202	1.67151	2.35408	2.56794
9030616G12Rik	0	0	0	0	0	0	1.2201	0	0	0	0.0771855	0	0	0
9030619P08Rik	0	0	0	0	0	0	0	0	0	0	0.0475851	0	0	0
9030624G23Rik	8.41067	6.81001	9.06332	8.21147	12.2178	8.40703	8.96714	10.3558	18.3946	22.0188	13.486	25.9836	22.2988	10.3376
9030625G05Rik	6.4401	10.2818	6.52942	8.00795	15.2115	9.47366	7.56522	16.5547	3.02197	3.60283	2.05962	2.01702	1.75883	1.0549
9130008F23Rik	0.705709	0.618185	1.00527	0.567758	2.82223	0.808481	2.74596	1.91898	0.531888	1.13372	0.35683	0.640751	1.62764	0.981934
9130015A21Rik	1.2692	0.975485	0.837074	0.695245	1.09791	0.315744	0.267805	0.967054	1.12222	0	0	0.140396	0	0
9130015G15Rik	1.01533	0.417297	0.889983	0.458104	1.88527	1.11291	0.662145	3.08634	0.505854	0.70574	0.11298	0.522651	0	0.68302
9130015L21Rik	0	0	0	0	0	0	0	0	0	0	0	0	0	0
9130019O22Rik	2.57554	2.52104	0.955824	2.63068	0.875335	3.27961	1.81006	2.00612	2.14921	1.70344	2.62688	4.25713	3.20437	2.57064
9130019P16Rik	1.84575	1.90872	1.47055	1.32851	2.05907	3.1259	1.74638	3.81448	0.153471	0.641981	0.692429	1.92574	1.09127	1.41399
9130023H24Rik	3.78609	2.67741	2.05115	3.12736	2.94437	0.73264	2.60241	0.886854	5.25967	4.81091	8.66987	9.5514	4.13031	5.8567
9130024F11Rik	1.76119	0.344626	0.478228	2.0284	1.6403	2.54176	1.64185	2.0019	0.420758	0.318457	0.266832	0.58684	2.15081	2.60197
9130204L05Rik	0	0	0	0	0	0	0.908976	0	1.4131	0	0	0	0	0
9130209A04Rik	3.34184	1.55748	1.59078	2.7959	2.36873	2.02382	1.73766	6.22339	1.00266	1.97763	0.151545	0.334446	4.87813	1.11327
9130221F21Rik	9.11203	7.86113	7.61945	8.6554	20.2573	12.8269	14.3477	15.4359	11.6283	11.6804	0.568739	2.17885	6.8864	4.14975
9130221H12Rik	14.3216	9.48138	10.4989	10.9768	6.44116	12.237	5.16945	10.5679	14.3564	19.8568	21.8895	18.6673	14.4241	10.6833
9130227L01Rik	4.18627	3.20039	3.47846	2.88866	6.06693	4.80905	3.40926	4.55308	1.01772	1.88879	0.152693	0.898317	0.731268	0.648029
9130230L23Rik	0	0	0	0	0	0	0	0	1.5699	2.21643	0	0	0	0
9130401M01Rik	138.529	144.223	135.76	128.27	99.7514	75.712	96.5933	95.0632	53.234	71.0567	148.347	122.039	186.344	171.638
9130409I23Rik	1.75167	1.17098	0.693665	1.20884	2.96112	2.10144	1.63631	2.64458	0.149188	0.566205	0.0682068	0.113665	0	0
9230009I02Rik	0	0	0	0.199836	1.19848	0.226283	0.0967409	0.138939	0	0	0	0	0	0
9230019H11Rik	1.33271	1.44347	1.82957	1.66077	3.90139	3.10332	2.32264	3.11428	0.406824	0.62585	0.245148	0.684355	1.46324	1.40931
9230020A06Rik	0	0	0	0	0.130195	0	0.142683	0	0	0	0	0	0	0
9230102K24Rik	0	0.0855299	0	0	0	0.482008	0	0.237631	0	0	0	0	0	0.350388
9230102O04Rik	0	0.420072	0.208726	0	0	0	0	0	0	0	0	0	0	0
9230104L09Rik	0	0	0.240872	0.232527	0	0	0	0	2.2476	5.8727	0	0.163085	0	0
9230105E05Rik	10.5093	10.0411	11.1589	10.8585	24.3989	11.7079	10.7347	18.0195	14.3048	10.9468	0.610093	1.37328	3.32726	2.26243
9230110F15Rik	0	0	0	0	0	0	0	0	0	0	0	0.115832	0	0
9230112D13Rik	0	0.351392	0	0.867174	0	0	0.341616	0.738788	0.261797	0.394567	0.449614	0.189401	0	0
9230112J17Rik	1.62641	1.95661	1.96059	1.91607	2.27693	2.80669	1.91542	4.84645	0.809815	1.94772	0.479041	0.66888	0.859305	1.86787
9230114K14Rik	8.6235	6.07318	10.2387	8.819	13.143	10.2432	10.1781	12.5417	7.11799	7.40221	4.39625	5.31018	8.22681	7.54043
9230116L04Rik	2.34386	2.68006	4.02205	3.45351	6.87502	7.13563	2.22383	6.44157	0.101062	0.915865	1.28504	0.974255	2.5651	2.17481
9230116N13Rik	2.88446	1.80735	1.47018	2.89032	3.34652	2.16134	4.52903	5.04616	0.883313	2.91479	4.96522	4.11865	5.19831	3.37005
9230117E06Rik	3.07262	0.90459	4.50251	0.890189	12.2212	2.55196	8.63977	16.3017	0	0	0.380356	0	3.18951	3.96258
9330020H09Rik	4.53695	5.90956	4.65549	4.38087	6.37387	7.4834	6.63967	7.9623	4.42302	3.6651	3.47447	3.23934	6.45687	5.37728
9330102E08Rik	10.4844	6.6405	10.7298	8.62387	9.58605	7.97857	6.69859	11.4854	4.38679	3.09736	38.2648	35.0115	17.5336	18.1591
9330104G04Rik	6.23758	4.64139	4.07103	5.11284	11.6411	7.76689	6.87643	11.9362	5.4304	7.35226	1.48455	2.23898	6.15456	4.48925
9330111N05Rik	0.264839	0	0.156376	0.308987	0	0.262235	1.04852	0.430844	0	0.166411	0.0976318	0.299733	0.550474	0
9330117O12Rik	0.257141	0.280553	0.33895	0.219972	0.369249	0.190354	0.108143	0.312329	0	0	0	0.0588477	0.405643	0.239977
9330133O14Rik	4.32748	3.53254	3.05914	4.88559	1.95021	1.31946	0.522951	1.18192	7.84165	9.16631	9.36209	7.26397	3.19126	3.5579
9330136K24Rik	15.665	12.6774	14.9951	16.5114	35.3912	18.5679	24.7277	30.3785	11.9231	14.8801	4.78258	4.95399	18.1111	16.1383
9330151L19Rik	6.86331	5.98283	7.53657	5.92816	11.2166	8.87542	5.56607	9.74148	13.7132	16.474	8.07955	9.63476	4.89653	4.60955
9330158H04Rik	11.8877	8.70148	9.4283	9.19847	20.7407	16.343	15.1787	21.2727	12.7945	14.3834	2.66381	5.13299	10.9345	7.41724
9330159F19Rik	2.14187	2.36016	2.47498	3.28191	5.02382	3.50557	3.49023	5.57792	2.27158	3.33786	0.879242	1.21828	3.16289	2.40021
9330159M07Rik	13.3237	9.97404	10.207	14.0074	26.518	19.8269	14.6153	21.2327	10.4196	10.386	9.02307	11.5905	22.7105	15.9945
9330162012Rik	0.504782	0	0.074569	0.221635	3.43468	0	0	0	3.0326	1.10544	0.528457	1.07003	0	0
9330162B11Rik	0	0	0	0	1.0733	0	0.0865275	0	0.0667438	0	0	0	0	0.368091
9330175E14Rik	2.34304	1.91938	2.42047	2.36823	4.98107	7.41545	2.26528	2.48248	1.68566	2.9965	0.171815	0.623104	0	0.256234
9330175M20Rik	0.676855	0.397482	0.599759	0.399293	1.78374	0.542934	0.736386	1.24748	4.00311	3.44406	0.15993	0.467141	4.09745	1.37989
9330178D15Rik	0.499155	0.814669	0.546708	0.757428	1.77063	0.429928	0.971566	1.29376	0.111367	0.401472	0.116804	0.173042	0.425397	0.361678
9330179D12Rik	1.97396	1.3835	3.37886	4.37588	10.6264	9.07999	12.2428	1.94607	1.07348	1.37244	0.711936	0.691204	2.20587	3.907
9330182L06Rik	4.39885	8.59314	5.35745	7.35053	8.33856	10.0249	5.92071	7.84982	5.56773	3.12447	14.2368	12.2336	12.392	11.6232
9330182O14Rik	0.227341	0.248733	0.0998873	0	0.39108	0.336006	0.431058	0.624107	0	0	0	0	0	0
9330188P03Rik	0.631664	0	0	0	0	0	0	0	0	0	0	0	0	0
9330198I05Rik	0.229578	0.905139	1.16162	1.13913	4.87468	0.508745	0.531464	4.81868	0.349536	1.85366	1.10989	0.899552	1.04151	1.03796
9330199G10Rik	0.13829	0	0.0608868	0	0	0	0	0.302872	0	0	0.0194097	0	0.309342	0.273081
9430007A20Rik	0	0	0	0	0	0	0	0	0	0	0	0	0	0
9430014N10Rik	0	0	0	0	0	0	0	0	0	0	0	0.138788	0	0
9430015G10Rik	23.323	21.7492	24.7238	24.0232	26.7053	11.3443	20.5919	17.9072	10.2034	8.5366	61.595	56.7245	30.0313	30.4963
9430018G01Rik	4.42439	3.78757	3.14473	3.63788	7.88392	8.9551	5.1969	8.2368	1.09473	0.766607	4.23508	2.73131	14.6539	9.64517
9430019J16Rik	3.11413	2.73418	1.23975	8.48822	10.2912	1.22449	3.69052	2.28441	0	0	0.0420907	0.433889	2.8576	1.63462
9430021M05Rik	5.85509	4.49744	6.27484	5.40739	12.9019	11.314	8.5559	10.8777	0.853849	0.905004	0.813935	1.08564	2.05399	3.18772
9430037G07Rik	7.02345	4.92435	5.1347	6.49732	13.9687	6.76822	8.36436	7.8571	7.16732	8.22486	9.77107	13.3978	19.7536	18.5359
9430038I01Rik	15.326	19.517	19.2985	15.0374	28.7785	20.5823	32.1143	26.6781	22.0705	29.8087	24.8379	23.2191	26.5013	20.7105
9430041J12Rik	1.02308	1.04161	0.858884	0.489886	0.352749	0.920972	0.216135	1.19002	0.380497	0.384676	0.275149	1.85088	0	0.820057
9430060I03Rik	1.45499	0.218567	0.594502	0.533653	2.05181	0.16331	0.711511	1.31088	0.207018	0.450486	0.480186	0.314502	3.27776	2.63454
9430065F17Rik	6.98804	5.86508	13.26	3.49098	6.82317	12.9214	10.2601	4.76078	0.517773	0.228178	5.52649	7.48125	11.6282	5.95192
9430069I07Rik	0	0.334665	0	0	0	0	0	0	0.440684	0	0	0.105639	0	0
9430078K24Rik	0.524925	0.517228	0.43433	0.440491	1.6502	0	0.211174	0.438127	1.77825	1.32133	0.029139	0.312528	0.527283	1.65574
9430083A17Rik	1.82225	1.03361	1.61006	2.91458	2.74356	4.20294	3.2465	5.64372	0.149385	0.793803	0.81559	0.835789	3.82465	2.29971
9430091E24Rik	6.7117	4.72822	6.83236	8.44194	11.8191	13.1257	9.54222	13.2732	11.4452	9.40657	9.78363	11.6561	17.8955	7.98319
9530002B09Rik	0	0	0	0	0	0	0	0	0	0	0	0.902736	0	0
9530003J23Rik	0.433978	1.03449	0.383568	0.188738	0.75284	0.107998	1.22044	0.664229	0.137401	0.62283	0.197275	0.0635077	0	0
9530014B07Rik	0	0	0	0.38252	0	0	0	0	0	0	0	0	0	0
9530020I12Rik	8.74532	7.86108	8.16833	10.2613	12.8708	14.5592	10.1476	22.5783	2.07386	2.54138	0.311993	1.04267	14.0785	15.4747
9530026F06Rik	0.564864	0.325085	0.971248	0.81425	0.209524	0.901139	0.773788	0.445183	0	0.747541	0.115994	0.0987485	1.1759	0
9530026P05Rik	0.566118	4.07331	2.24911	0.496113	3.46895	0.562237	2.6418	2.42337	0.69182	1.05524	0.0782832	0.308472	5.72471	1.72875
9530027J09Rik	2.99095	4.20759	3.33438	4.33188	1.63797	4.91	2.31171	7.05121	2.32406	2.5138	1.81693	2.51547	5.27588	3.42419
9530036O11Rik	1.22583	0.676059	0.574016	1.16274	3.48539	0.966603	1.22589	1.97793	0.348975	0.903746	0.197913	0.216275	0.507514	0.794111
9530051G07Rik	0.377902	0.227908	0.270342	0.328205	1.20907	1.40368	0.457953	0.518879	0	0.696574	0.207228	0.224315	1.21786	0.441588
9530052C20Rik	1.21228	0.151383	0.273614	0.120276	0.483368	0.306911	0.0292243	0.50554	0.126631	0.323613	0.541517	0.633559	0.244373	0.416528
9530052E02Rik	5.1562	7.24568	3.40012	6.39357	7.80414	7.53918	6.0125	6.09009	1.64331	2.23438	0.753732	1.03634	3.95022	2.88299
9530053A07Rik	0.0657242	0.0116497	0.034934	0	0.0151118	0.0261434	0.0271226	0	0.145383	0	0.102622	0.0949321	0.224878	0.0796985
9530059O14Rik	0.862109	0.379134	0.404685	0.821891	0.342679	0.717893	0.612625	2.41625	0.0645631	0	0.0147522	0.058213	0.480277	0.470939
9530062K07Rik	0.73906	8.0102	4.25457	0.996626	2.65913	2.62967	1.41432	5.05895	10.2272	1.19266	8.25217	4.54463	12.9938	8.38222
9530068E07Rik	50.0649	45.2406	50.3432	54.2687	41.5492	49.1071	52.9885	62.4005	152.361	167.768	128.112	142.881	60.2967	56.4741
9530077C05Rik	36.0046	39.874	34.6079	35.0315	27.9349	22.9954	16.3691	18.5861	8.98468	13.0087	37.8504	32.5169	43.085	48.9472
9530080O11Rik	3.7707	4.83987	3.51475	4.68601	11.5593	8.11821	5.15835	6.61572	1.218	0.203505	2.65688	3.15803	8.59364	4.72814
9530082P21Rik	6.40218	8.15557	8.65691	8.73986	6.04347	10.6536	7.01665	9.99658	5.28094	5.4567	4.79022	4.32027	2.55801	3.17845
9530091C08Rik	2.80281	1.58225	2.62667	3.03822	10.079	3.7796	3.6823	7.49133	6.89209	8.00684	0.497091	1.0805	4.82628	3.59329
9630001P10Rik	0.732141	0.520111	0.648744	0.398225	1.63617	1.09207	0.753563	1.17955	0.916293	1.97525	0.655443	1.04649	2.77155	0.886608
9630013A20Rik	0	0.14448	0	0	0	0	0	0	0.261409	0.0995668	0	0	0	0
9630013K17Rik	0.129539	2.16161	0.342305	0.449857	1.34364	1.29048	0.109548	0.6341	0.660528	1.25309	1.2368	2.66081	0	0.858268
9630028B13Rik	4.98408	4.326	4.75757	4.40544	5.90341	4.49021	5.18866	7.90734	3.17535	3.44207	0.771581	1.50523	3.54782	4.02298
9630028H03Rik	0	0.0435496	0.262989	0	0	0	0.0418732	0	0	0	0.0140451	0.0317644	0.286871	0.170253
9630028I04Rik	2.45111	2.34299	1.88564	2.42143	4.34663	2.10593	1.96443	5.14146	3.08961	3.16987	0.268596	1.41294	0.500317	0.601131
9830107B12Rik	1.3664	0.631165	0.698586	1.5261	4.31348	2.66024	1.33402	1.96613	0.632744	1.08046	0.21647	0.305149	1.4709	1.31788
9830132P13Rik	2.49398	1.91686	2.50602	2.90568	3.95195	2.6348	2.83264	3.95378	1.78318	2.60098	0.111039	0.404076	1.65308	1.93954
9830166K06Rik	3.81918	3.53943	3.03567	4.32438	7.2618	4.83217	4.31383	6.25403	1.57627	2.1234	0.883361	0.84993	1.05051	1.67997
9930012K11Rik	0.5384	0.262639	0.421907	0.471793	1.51242	2.62798	1.52091	1.82467	1.17265	2.11303	0.542163	1.38487	0.899053	1.09848
9930014A18Rik	0.277448	0.436631	0.148583	0.401603	0.89704	0	0.654269	1.04764	0.593319	0.853483	0.496231	0.981704	0.757493	0.536336
9930021J03Rik	64.7356	59.8814	63.7732	59.8468	114.877	119.947	59.7567	106.45	58.188	56.5264	41.8219	49.6213	39.8994	39.0573
9930104L06Rik	7.95983	8.24703	8.45084	5.00723	7.43363	4.14862	6.99781	10.5338	2.68123	1.79768	10.1921	9.80764	10.6021	12.7356
9930111H07Rik	8.20921	8.69615	6.24081	8.52172	35.4463	12.4075	21.8505	21.6144	2.15729	4.11986	1.38926	4.40308	3.74957	2.86452
9930111J21Rik1	9.59083	7.30336	11.0125	11.3203	29.0871	17.0037	11.0073	20.328	5.91678	7.99252	0.201684	0.906228	4.40013	1.78482
9930111J21Rik2	0.441737	0.0434014	0	0.169758	0	0.143887	0.0417354	0.618602	0.383144	0.194582	0	0	0	0
a	0	1.65171	0	0.231999	0	0	0	0.660067	0	0	0.121351	0	0	0
A030001D20Rik	3.90879	3.59616	3.75309	3.41917	3.0849	3.70466	2.69288	1.24561	5.25269	2.47279	4.04258	6.04529	11.5238	9.86287
A130010J15Rik	4.2244	3.75614	5.74338	3.85339	9.76494	8.13104	5.10488	6.05064	7.61884	7.27893	12.1814	10.7464	11.2818	10.0156
A130030D18Rik	0	0	0	0	0	0	0	0	0	0	0	0	0	0
A130077B15Rik	152.061	120.671	129.596	140.812	358.586	222.779	218.107	330.387	158.796	182.883	59.04	70.5801	563.403	467.367
A1bg	0	0	0	0	0	0	0	0	0	0	0	0	0	0
A1cf	0.658663	0.616034	0.88844	0.725468	1.6409	0.928666	0.889367	1.52467	0.581096	0.914601	0.0272434	0.0518622	0.902016	0.281517
A230001M10Rik	0.126317	0	0.2229	0	0	0.188969	0.213761	0.153957	0.229059	0.115392	0	0.0377122	0	0
A230009B12Rik	0.233175	0	1.02452	0	1.22338	0	1.0477	0.368891	0.578034	0.24305	0.016184	0.0548632	0.371259	0
A230020J21Rik	0.581922	1.78797	0.154458	0.740077	3.81663	0.307122	0.858717	2.08644	1.54683	1.22598	0.22564	0.172664	1.3178	0.798658
A230028O05Rik	0.0399753	0.0704015	0.77834	0.0350465	0.185478	0	0.135519	0.391545	0.0478771	0.512562	0.0218066	0.170323	1.28208	0.306826
A230050P20Rik	8.15568	5.21919	6.785	4.63039	11.5849	9.54521	8.1591	15.3835	4.17971	4.66086	4.91727	6.67452	13.0798	9.61843
A230051N06Rik	7.53175	1.75843	1.57184	0.582487	5.14659	5.77485	3.3778	4.32863	0.812569	0	0.226059	1.86858	1.305	1.57291
A230056J06Rik	2.57514	2.4018	2.21471	2.87	4.74822	2.67595	2.99053	4.62887	1.23693	2.16266	0.59813	0.75765	1.29219	0.544522
A230056P14Rik	1.59259	2.3195	1.62263	1.64487	2.50214	4.54817	2.27311	1.92774	1.96531	2.11956	1.86635	5.08736	3.10828	6.94328
A230057D06Rik	1.08881	0.857331	1.1624	0.587368	3.76612	1.70353	1.21559	1.18976	0.940467	0.719155	0.326086	1.10926	0.702779	1.23495
A230070E04Rik	1.28442	0.532767	1.20558	1.62875	9.15122	8.83603	1.65438	6.95071	0	0	0.124693	0.0562796	2.29161	2.91933
A230072C01Rik	37.8821	37.355	38.2969	43.0538	90.4536	63.7771	56.546	77.0053	31.8929	41.7838	7.30553	14.3587	12.2355	13.8654
A230072E10Rik	7.0118	5.37527	6.21156	6.13802	11.7074	6.96336	8.86329	9.21917	4.34481	3.81732	3.40057	1.30711	4.51554	4.6686
A230077H06Rik	4.60198	3.84116	3.71883	5.27983	11.2788	7.56892	4.77343	9.94049	2.55222	2.96496	1.02555	1.45197	5.57997	4.39671
A230083G16Rik	1.75991	0.258565	0.90328	1.28661	1.17891	0.581615	0.990234	0	1.14848	3.75318	0.902998	2.1009	0.755099	1.37026
A230103J11Rik	1.64614	0.485703	1.5892	3.72161	0.641076	0.832678	0.634743	0.586727	1.10731	0.505685	5.184	7.16005	5.83351	6.76169
A230107N01Rik	0.381026	0.0416451	0.336832	0.291701	0.778951	0.520481	0.524857	0.757459	0.22909	0.0875015	1.04324	0.988627	0.693702	1.18253
A230108P19Rik	1.02991	0.66714	1.02309	1.35468	2.12634	0.935476	0.833102	0.713736	0.108209	0.498469	0.490364	0.814311	0.853044	0.832781
A2m	0.0681794	0.541235	0.16059	0.497465	0	0	0.0576144	0.968738	0.444009	0.126528	0.641629	1.08528	1.9501	1.48253
A2ml1	3.31535	1.80857	3.60491	3.84175	11.2781	10.053	5.00106	14.6091	0.754025	0.386975	0.804276	0.77901	3.94108	3.77908
A330008L17Rik	0	0	0.0748097	0	0	0	0	0.104732	0.103035	0	0	0.0137128	0.632797	0
A330009N23Rik	1.75748	1.34418	0.414131	1.36932	6.76634	7.49189	3.17333	3.30386	2.22395	2.84686	0.767072	1.40239	1.19923	0.861518
A330015K06Rik	0	0	0	0	0	0	0	0	0.189789	0	0	0	0	0.363482
A330023F24Rik	0.701818	0.423027	0.194949	0.558428	1.04617	0.338701	0.220934	0.416215	0.838715	0.473457	0.152435	0.236768	2.5821	0.913275
A330032B11Rik	25.3265	20.8292	20.159	20.7721	46.7482	26.251	30.2896	45.7012	19.9587	28.84	27.1044	7.09879	37.4037	27.7334
A330033J07Rik	0.565964	0.0354411	0.106511	0.105477	0.0464826	0.399365	0.578651	0.294608	0	0.153513	0.062256	0.0577461	1.66075	1.58583
A330035P11Rik	5.27192	5.84633	3.46114	3.74008	5.84011	2.79966	4.36323	4.27795	4.03951	8.6956	1.35647	2.13415	2.75499	4.70739
A330040F15Rik	0.783276	1.27108	0	0.917319	0.449871	0	0	1.12008	0	0.520654	0.122841	0.38477	0	0
A330041J22Rik	2.19987	0.961294	0.794751	0.554513	3.86035	0.697236	1.24427	3.14238	1.01355	1.44627	2.29038	1.6035	1.25333	1.70958
A330048O09Rik	0	0	0	0	0.612611	0	3.29474	0	0	0.557435	0	0	0	0
A330049N07Rik	8.90901	6.82275	6.06142	7.42585	20.4823	5.82992	9.22927	16.675	2.00015	3.13953	6.23167	7.08565	6.49665	8.09676
A330069E16Rik	30.0046	31.6057	31.8831	30.3555	37.2271	48.9011	31.5349	48.1651	34.4515	49.1482	87.1223	14.2565	192.553	136.394
A330070K13Rik	0	0	0	0	0	0	0	0	0	0.544371	0	0	0	0
A330074K22Rik	0.75079	0.0413328	0.538939	0.533236	2.64226	0	0.197644	1.31151	3.50255	1.91719	0.318177	0.247976	0.691551	0.289726
A330076C08Rik	0.494555	1.61635	0.813488	0.211684	0.424096	0.182888	0.571731	0.0754493	0.147319	0.340741	0.312129	0.219659	1.51927	0.895361
A330076H08Rik	0.386058	0.224449	0.337911	0.710283	2.00664	0.378931	0.162805	2.76433	0.927516	1.18462	0.18481	0.770458	1.98269	1.95012
A330093E20Rik	0	0.0867092	0.380778	0.0421712	0.615004	0.541201	0.122908	0.340624	0.183986	0	0.219316	0.260726	0	0
A330094K24Rik	0.438003	0.386699	1.25091	0.383309	1.17924	0.541127	0.650131	2.65678	0.814119	0.62134	0.787082	2.07822	1.6119	1.28913
A330102I10Rik	2.44798	1.23522	3.81085	3.30989	1.53623	1.05862	3.04668	0.366912	0.715197	3.71474	2.28617	1.89968	6.2744	7.31878
A3galt2	0.195075	0.11468	0	0	0.0750041	0	0	0.0794931	0.615937	2.30609	0.170687	0.266024	0	0.0938759
A430005L14Rik	19.0262	14.9926	18.8973	18.1923	17.4828	25.1506	33.5134	16.8659	13.3756	11.4431	59.7088	59.548	63.1946	60.249
A430033K04Rik	9.70716	6.43138	6.30823	8.54234	16.2494	8.27795	10.6175	18.1925	16.0238	25.0354	3.52594	8.44455	9.3465	6.8322
A430035B10Rik	1.59381	0.360742	1.97403	0.768002	3.73308	3.22557	2.30271	1.16443	2.15244	2.16175	1.4881	0.974452	1.59295	3.62573
A430046D13Rik	15.4656	10.0494	17.407	13.8797	26.4447	14.289	14.1832	23.2136	13.8951	13.7889	4.17803	6.21574	11.2323	9.88266
A430057M04Rik	1.86744	1.48707	1.83348	2.29387	2.23993	2.0547	1.69397	2.42108	3.10874	3.20598	0.193774	0.41509	0.797594	0.3928
A430078G23Rik	4.37058	2.3093	2.99758	3.43999	6.60122	2.04694	3.67276	6.54296	2.49434	4.84438	0.824528	3.24248	2.00384	3.03535
A430078I02Rik	2.48391	2.19547	2.84986	3.4997	4.17032	2.3611	2.24871	1.71707	1.44189	1.50084	0.541711	1.82703	2.0546	4.40208
A430085M09Rik	20.6996	16.6575	16.3219	18.0503	38.5293	24.4537	24.7927	48.4468	5.73639	5.81114	0.506631	2.4643	7.12514	4.55901
A430088P11Rik	0.851694	1.04958	1.17547	0.975802	1.7644	0.803102	1.02159	1.08933	1.2984	1.73471	0.34487	0.680991	0.750348	1.05699
A430089I19Rik	0	0	0.0566272	0	0	0	0	0	0	0	0	0	0	0
A430090L17Rik	0.889559	0.286723	0.602569	0.912414	1.81875	2.06779	0.454669	1.40464	1.32765	0.797243	0.0920175	0.259067	0.990911	1.50717
A430093F15Rik	0.163508	0	0.288907	0.379863	0.884434	0	0	0.132925	0	0	0.113881	0.0160145	0	0
A4galt	1.92844	1.08536	1.25337	2.21555	2.79123	0.248243	1.42395	2.59568	4.40185	6.90637	0.849139	2.37512	4.1548	1.76091
A4gnt	0	0.214543	0	0	0	0	0	0.844462	0	0	0.0216614	0	0	0
A530006G24Rik	0	0	0	0	0	0	0	0	0	0	0	0	0	0
A530010L16Rik	0	0	0	0	0	0	0	0	0	0	0	0	0	0
A530013C23Rik	0.0561289	0	0	0.0494301	0.0653312	0	0	0.200967	0.198928	1.01161	0.0136468	0	0	0
A530016L24Rik	0	0	0	0	0	0.478679	0	0	0.323923	0.165177	0.0107169	0.0120671	0.418533	0.654952
A530021J07Rik	0	0	0	0	0	0	0	0	0	0.336854	0	0.186094	0	0.300088
A530032D15Rik	0	0.0630568	0	0.261388	0.396846	0	0	0.0991708	0	0	0.0942452	0.0241578	0.350096	0.784652
A530046M15Rik	0	0	0	0	0	0	0	0	0	0.295697	0	0	0	0
A530050N04Rik	5.29566	4.13924	6.789	6.76819	13.5414	6.26098	8.50279	8.99851	4.26366	3.67789	0.503441	1.09186	3.07613	2.53163
A530053G22Rik	0	0	0	0	0	0	0	0	0	0	0	0	0	0
A530058N18Rik	0	0	0	0	0	0.237171	0	1.07305	0	0	0.0440797	0.024714	0	0
A530064D06Rik	4.08494	3.00519	4.59993	4.17152	13.643	3.81443	4.71851	8.27343	2.31887	1.34763	1.62451	3.38402	5.80111	5.43653
A530065N20Rik	1.53761	1.26272	1.24739	1.29778	2.06653	1.63339	1.7915	3.30418	1.04504	1.41975	0.0618689	0.562796	0.982822	1.18057
A530072M11Rik	11.6315	4.4224	5.29409	7.40615	13.3459	7.598	3.68748	7.1927	0.699569	1.07388	1.21726	1.6005	4.12105	2.67822
A530088E08Rik	2.97551	0.84781	1.13748	1.54824	3.3326	8.2539	3.65588	4.46083	0.165127	0.251995	0.571214	0.521593	0.478619	0.621576
A630001G21Rik	1.03702	0.429821	0.807524	0.367885	3.58517	1.63963	2.1587	0.598693	0.695478	0.324946	0.276042	0.184138	0.337822	0.408514
A630001O12Rik	0	0	0	0.0362126	0	0	0	0	0	0	0	0	0	0.124652
A630010A05Rik	1.44324	2.4134	1.67785	1.33451	3.69047	0.758316	1.54032	2.8809	0.724124	0.416787	0	0.152771	0	0.275093
A630012P03Rik	0	0	0	0.104726	0.0689379	0	0	0.436335	0	0	0.0311999	0	0.326585	0.598096
A630019I02Rik	2.40623	0.307293	0.962312	2.09316	3.25875	1.51437	1.03242	4.16714	0.217333	0	0.0134211	0.0663005	0	0.380937
A630023A22Rik	1.37548	0.957514	0.696331	1.346	0.563786	1.86318	2.41269	1.69548	0	0	1.4378	1.67377	0.743074	2.96906
A630023P12Rik	0	0	0	0	0	0	0	0	0	0	0.151372	0.250155	0	0
A630066F11Rik	1.24237	0.911696	2.00925	1.97365	2.03055	4.60835	1.83149	2.1424	1.5168	2.85339	4.45105	4.95787	2.95872	3.54559
A630072M18Rik	10.098	7.27965	8.54693	7.75925	17.5118	10.4794	12.1728	16.2367	5.31439	7.42101	7.01343	6.71873	10.3869	11.5397
A630073D07Rik	0	0	0	0	0	0	0	0	0	0	0	0	0	0
A630075F10Rik	23.9823	17.7495	21.1772	26.9563	56.21	30.188	26.859	52.0747	17.4651	19.6229	0.745531	4.03062	17.5545	12.6887
A630076J17Rik	0	0	0	0	0	0	0	0	0	0	0	0	0	0
A630077J23Rik	0	0.13122	0	0	0.691925	0	0	0.364175	0	0	0	0.658616	0	0.484843
A630089N07Rik	362.244	280.734	343.16	328.542	889.368	620.526	493.899	828.162	204.546	236.217	33.6829	84.3314	166.868	130.548
A630095E13Rik	0	0	0	0	0	0	0	0	0	0	0	0	0	0
A630095N17Rik	0	0	0	0.233211	0	0	0.190737	0	0	0.53041	0.388044	0.803493	0	0.758071
A730004F24Rik	0.0913225	0	0	0	0	0	0	0	0	0	0	0	0	0
A730006G06Rik	0.421991	0.901266	0.54366	0.644768	0.629517	0.467869	0.452671	0.845333	0.518361	0.508794	0.0168253	0.0808148	0	0.50102
A730008H23Rik	8.66516	8.80998	11.5434	10.3698	10.85	9.55664	9.28074	12.0179	13.7245	10.1531	29.493	48.0166	33.7622	39.1771
A730013G03Rik	0	0.661517	0	0.0983503	0	0	0.0975055	0	0.630966	0.239855	2.81641	3.08927	1.24976	0.580012
A730017C20Rik	2.36603	2.87636	2.32161	2.73836	7.07101	0.64746	3.11408	1.86036	1.12755	0.732336	2.93089	3.91127	4.00708	4.69213
A730017L22Rik	56.0392	47.3455	50.1109	56.9883	134.248	90.4132	89.9499	116.051	56.1379	66.3627	13.1297	28.7908	77.9324	67.4768
A730018C14Rik	0.622774	0.0612366	0.12276	0.422537	0.239846	0.138368	0.116988	0.338716	0	0	0	0	0	0.235872
A730020E08Rik	9.5079	6.06079	6.35624	8.1632	16.4187	8.79204	11.8557	13.487	2.52884	4.98643	1.95076	2.02915	10.0332	5.98904
A730020M07Rik	0.141094	0.0829851	0.0416088	1.12514	0.493502	0	0	0	0	0.542058	0.24216	0.259004	0	0.162526
A730035I17Rik	0	0	0	0	0	0	1.13262	0.0669135	0	0	0	0.073854	0	0
A730036I17Rik	0.433065	0.427101	0.48873	0.34517	1.69341	1.10349	0.523416	0.800272	1.17873	0.450345	0.0702387	0.355359	0.176454	0.106772
A730043L09Rik	2.89068	2.59354	3.06055	3.03684	4.8201	3.9314	4.60183	8.7409	1.1103	2.01756	0.0285614	0.839937	0	0
A730046J19Rik	0.199508	0.213207	0.0390607	0.367318	0.547229	1.80459	0.336914	1.03074	0.273027	0.250175	0.0375415	0.211355	0.148204	0
A730056A06Rik	0	0	0	0.0999192	0	0	0	0	0.328265	0.490713	0.12438	0.420399	0	0.280212
A730063M14Rik	2.66512	0	2.34323	0	24.2295	23.906	2.24818	9.78904	0	5.43411	1.31965	2.97204	0	12.8991
A730081D07Rik	19.5796	18.0982	17.8423	22.0087	41.8618	20.783	19.105	35.7894	4.8886	8.70412	0.949055	4.13195	5.35616	7.54562
A730082K24Rik	5.7372	3.8927	5.07729	6.59005	9.17448	8.77351	5.89968	11.9796	4.53772	3.74852	0.287025	1.69668	3.5121	2.56514
A730085K08Rik	0	0	0.681279	0	0.440287	0	0	0	0.431764	2.54837	0.28776	0.540063	2.33984	1.45777
A730090N16Rik	0	0.315788	0	0.234924	0	0	0.076235	0	0	1.13556	0.406856	0.370657	1.78816	0.353593
A730098A19Rik	1.20701	0.80374	0.66621	2.32755	4.18893	3.01481	0.511877	3.1122	0	0	0.108125	0.123952	2.42058	0
A830009L08Rik	0.0399012	0.281357	0	0	0	0.079885	0.135389	0	0.0514496	0.0776739	0	0.0113427	0.42468	0
A830010M20Rik	5.0551	5.48315	6.07216	5.31989	8.92432	8.31138	4.38662	8.60206	3.60155	3.05067	5.08335	5.78694	9.31518	7.31147
A830011K09Rik	0.482314	0.225289	0.470286	0.61476	1.01822	0.887812	0.659596	0.929063	2.44687	1.81729	0.0828172	0.687122	3.89668	2.46728
A830018L16Rik	1.80259	1.67157	2.07524	1.96349	2.9584	2.10883	2.56226	3.01026	1.2039	1.09004	0.757191	0.927689	3.52985	1.93082
A830019L24Rik	0	0	0	0	0.25224	0.144213	0	0.0882837	0	0	0	0	0	0
A830019P07Rik	0	0	0	0	1.07418	0.196747	0.111641	0	0	0	0.153146	0	0	0.25334
A830029E22Rik	0	0	0	0	0	0	0	0	0	0	0	0	0	0
A830035O19Rik	2.21198	2.43656	2.67726	2.18502	1.68076	1.81981	3.69209	3.53732	3.15167	6.8553	1.43732	4.63848	5.03548	7.48903
A830036E02Rik	1.00236	0.699285	0.992929	1.47297	1.1416	0.867022	0.902457	1.97224	0.092102	0.060837	0.208115	0.508011	1.15037	0.874695
A830052D11Rik	12.1107	12.5485	16.0196	15.0693	22.0864	24.431	11.3752	18.8021	10.0498	14.2041	1.04901	2.26743	2.67253	5.71509
A830082K12Rik	14.0796	10.1502	12.2869	13.7984	25.2071	16.5096	17.9416	24.2531	7.6185	9.85792	0.628869	2.61007	2.53178	2.55393
A830082N09Rik	3.46844	3.43799	3.7556	3.72384	6.13584	3.90758	4.90519	7.70551	2.5977	3.83645	2.13374	1.53159	3.70086	3.24347
A930001A20Rik	0.274239	0	0	0.0806283	0	0	0	0.335702	1.15151	0.350895	0	0.0874643	0	0
A930001C03Rik	0	1.02	0.211876	0	0.190755	0	0	1.8162	0	0	0.070926	0.597821	0	0
A930002C04Rik	0.0448754	0.197983	0.158955	0.901362	0.522311	0	0.114758	0.276378	0	0.499279	0.02373	0.0266742	0.254852	0.618279
A930003A15Rik	0	0	0	0	0	0	0	0	0	0	0	0	0	0
A930003O13Rik	1.39998	1.06869	1.33519	1.94136	4.19896	2.75118	1.67596	4.47764	0.399513	1.36397	0.0697439	0.243184	1.08789	0.363956
A930004D18Rik	2.99611	0.808527	0.234855	0.934172	1.51618	2.68091	2.33406	3.41893	0.590977	4.13073	0.365425	0.602697	0.228234	0.745919
A930005H10Rik	16.9476	18.9726	12.4485	19.5446	27.8386	16.2064	13.359	24.6333	20.2423	29.5768	9.26002	6.1109	2.85099	5.78993
A930006I01Rik	0	0	0	0	0	0	0	0	0	0	0	0	0	0
A930006K02Rik	7.26278	7.46617	10.2878	14.3752	12.6283	10.1324	15.0167	17.3333	3.06068	3.8972	2.25361	1.78098	9.8741	6.52632
A930007A09Rik	2.13789	1.77826	2.31686	2.26956	2.71451	1.9344	1.69127	4.18113	1.14957	1.64724	1.91013	1.80613	2.44501	2.097
A930007I19Rik	2.64942	1.99055	2.7893	3.62011	4.13056	2.86159	3.70064	4.14257	1.49266	1.78653	0.317978	1.54154	1.10767	1.49423
A930009A15Rik	0	0	0.494842	0	0	0	0.117929	0	0	0	0	0.0420832	0	0
A930011G23Rik	3.32281	1.54594	1.40899	1.16092	1.25145	2.08105	1.49166	3.67136	1.37083	1.59012	0.0343996	0.126409	3.42542	3.8602
A930012L18Rik	1.50039	0.953393	1.24322	1.38251	3.09323	1.83573	1.75138	4.41444	1.27335	1.96156	0.207312	0.936181	2.93278	1.26863
A930013F10Rik	5.63089	5.01896	6.3371	4.66936	11.1822	7.99579	8.30224	7.52264	4.10812	2.8437	6.91962	7.73074	8.27324	7.53891
A930015D03Rik	1.02086	1.66345	2.70127	0.9106	0	3.12659	1.17685	12.7144	0.0443247	4.30295	0	0	0	0
A930016O22Rik	4.8435	3.07573	3.99939	2.25232	4.02247	3.6872	4.99796	3.90532	2.37685	2.9309	1.28406	2.22947	6.25179	6.66033
A930017K11Rik	1.39426	1.60886	0.783158	0.773001	2.70749	2.43797	2.9264	1.08808	2.22343	2.88505	2.32459	2.19696	1.42299	1.52709
A930017M01Rik	0.161513	0	0.0571819	0	0	0	0.109525	0.158096	0	0	0.12826	0.0285782	0	0
A930018P22Rik	3.64267	5.75242	1.60597	2.48957	2.60161	0.207935	1.56414	1.26382	0.869974	1.72156	1.82073	1.58167	1.03531	0.638486
A930019D19Rik	0.605943	0	1.32847	0.132927	0.704887	1.21246	0	0.374264	0	0	0.121542	0.135766	0.836813	1.96806
A930024E05Rik	3.59336	2.6579	2.26477	1.10486	4.54116	2.15871	4.71589	1.87489	0.240436	0.247925	0.433968	1.28825	3.58366	2.8998
A930031H19Rik	0	0	0	0	0	0.457316	0.77306	0	0	0	0	0	0.805791	0
A930033H14Rik	0.22715	0.250747	0.634728	0.755479	0.306836	0.52931	0.128129	0.556701	24.4012	27.3854	0.0867847	1.1591	0.398139	0.242215
A930037H05Rik	5.56635	6.19706	7.54435	6.63097	15.7311	11.1676	7.24832	7.89614	6.67339	7.43955	9.17983	8.74777	11.4561	9.5936
A930041C12Rik	8.69283	3.45493	8.02507	7.93315	21.7331	26.8577	8.43285	23.4146	1.70996	3.54489	1.82933	3.27169	23.899	21.4837
AA387883	0	0.0639658	0.0640711	0	0.501255	0	0.552624	0	0.0915707	0	0.0372564	0	0	0
AA388235	1.63471	1.16792	0.803278	1.52131	1.98384	1.38167	1.72659	2.50154	1.19334	2.41363	0.191766	0.935659	1.27407	1.1593
AA413626	2.98309	1.75647	5.24559	2.59275	0	0	1.67761	0	20.864	12.1648	0.492364	1.10888	0	0
AA414768	0.889947	0.307833	0.972689	0.523256	1.13489	3.67214	1.2426	0.460725	6.61209	5.43134	1.22798	10.5747	7.36631	3.31013
AA465934	72.7096	50.4172	41.1529	62.9351	55.4562	30.4723	82.0641	20.4205	5.18973	0	38.2345	25.2753	8.39102	7.94374
AA467197	4.60137	4.78173	4.80612	2.25109	4.99093	0.282711	2.17577	0	2.26396	1.11397	5.64959	16.0365	13.0496	6.14499
AA536875	0.94984	1.21108	0.973231	1.20702	1.41373	1.56661	1.07923	2.14332	1.04548	1.61383	0.0693283	0.143643	2.4488	1.38802
AA543186	3.72192	1.24246	2.37268	2.02867	1.64218	1.10616	1.92999	2.10585	1.35298	0.893636	2.6093	2.60979	0.479979	3.41802
AA543401	1.18943	1.53502	0.667663	0.0945778	0.991882	1.20674	3.75128	0.26603	0.274651	0.417554	0.177341	0	0	1.4094
AA545190	0	0	0	0	0	0	0	0	0	0	0	0	0	0
AA619741	0	0	0	0	0	0	0.0731284	0	0	0	0	0	0	0
AA792892	0	0	0.0539812	0	0	0.22829	0	0	0.300378	0	0.161968	0.196792	1.92644	2.15245
AA986860	0.156407	0.725687	1.0013	0.925349	0.224429	1.24885	0.429634	0.0956126	2.72989	1.67197	0.592755	1.17232	0.369154	0.58056
Aaas	107.386	94.7911	104.495	83.6832	97.4188	92.2317	68.5095	73.8764	56.5139	46.0483	111.305	95.3466	97.281	99.2595
Aacs	6.04043	5.80928	5.64286	7.17328	6.55584	4.81827	8.58579	8.41753	6.912	7.7154	27.291	31.5466	30.7806	24.3207
Aadac	0	0	0	0	0	0	0	0	0.707057	0	0	0.153533	0	0
Aadacl2	0	0	0	0	0	0	0	0	0	0	0	0	0	0
Aadacl3	0	0.0904865	0	0	0	0	0	0	0	0	0	0	0	0.118395
Aadacl4	0	0	0	0	0	0	0	0	0	0	0	0	0	0
Aadat	0.195553	0.286735	0	0.227202	0	0	0	0	0.244198	0	0.0542622	0.0608635	0.387056	0
Aaed1	93.7033	79.6741	73.2218	82.9082	138.322	113.129	87.9303	110.224	45.3201	50.3101	55.5581	55.3127	142.401	106.851
Aagab	12.5482	14.0011	14.4629	13.8678	11.7832	9.935	11.4	11.2871	8.07888	8.11022	29.1021	29.5566	29.3963	26.0174
Aak1	9.74888	9.25688	8.4098	9.9271	17.0056	10.3007	10.4699	14.0611	17.0319	18.5041	11.4843	15.2766	10.693	9.84116
Aamdc	20.6658	22.5824	25.4266	27.591	23.3348	11.5322	19.0448	14.1491	33.7683	21.1217	36.7154	39.5385	42.8638	38.4037
Aamp	98.624	94.4755	84.5788	75.7094	84.2374	77.2315	100.867	91.6603	19.4168	25.55	198.322	195.493	235.087	244.442
Aanat	0.841044	0.795986	0.793156	1.85638	0.214617	0.0891869	0.839461	0.219617	0.911988	0.669563	1.00491	1.48299	0	0.496897
Aar2	18.0711	16.7777	17.5803	16.2796	15.7569	18.6758	16.8446	16.2486	17.3492	16.8146	40.8368	41.5154	25.3548	27.2845
Aard	1.15203	1.27172	0.084749	1.00837	0	0	0.57216	1.41777	135.049	134.71	35.8263	525.473	23.5698	22.0984
Aars	41.452	38.9144	40.125	41.5865	36.4534	49.0314	50.5697	46.9837	51.1489	67.8733	111.77	112.406	81.3194	86.6967
Aars2	1.78028	1.30865	2.85353	0.670094	2.92091	1.03837	2.57164	1.6345	2.43549	3.29283	8.21504	14.2837	6.23117	6.74228
Aarsd1	22.562	15.4695	19.9366	21.806	15.9575	22.2623	16.9979	22.7337	30.6465	35.2193	65.6303	65.7396	31.3865	39.4869
Aasdh	5.32973	7.80196	6.70619	6.55263	7.03438	10.3732	7.31304	11.6396	5.24184	3.90779	14.7412	18.1157	18.7074	18.181
Aasdhppt	21.1619	21.7026	18.8322	18.949	24.1143	23.0557	22.7533	26.2491	16.093	16.3242	41.8541	39.0696	58.7211	45.3689
Aass	0.489736	0.114021	0.310748	0.193365	1.26552	0.0667912	0.17715	0.985958	0.678527	0.344341	0.376486	5.81546	0.516074	0
Aatf	82.9594	101.683	105.072	95.1917	80.9968	61.7387	63.7086	68.7437	49.5932	49.3802	94.9304	77.3513	129.311	118.108
Aatk	0	0	0.206097	0.018416	0.0485752	0	0.0358709	0	0.0536697	0.286516	0.705339	0.591839	0	0.213593
AB124611	2.85888	4.138	5.71207	7.42943	5.77435	3.80696	6.05174	10.3503	1.77711	3.15173	0.521915	1.00312	4.53948	2.00945
Abat	2.6001	2.55503	2.20719	2.97069	5.76977	1.96788	2.31113	3.18567	38.1937	42.2362	3.00934	27.4137	4.25096	3.77953
Abca1	55.3769	54.9628	61.2148	52.2526	133.987	89.6841	95.9577	116.763	227.975	329.915	37.0612	58.8946	102.329	84.1513
Abca12	0.453409	0.301746	0.270088	0.234976	0.198574	0.342149	0.207169	0.164731	0.0621878	0.118372	0.113291	0.420515	0.428742	0.257582
Abca13	1.63801	1.61361	1.44082	1.12209	1.48609	0.895839	0.941569	0.637778	0.0308178	0.0936086	0.109833	0.136062	4.39794	3.90397
Abca14	0.154134	0.135181	0.101727	0	0.179158	0	0.292912	0	0	0	0.0368945	0.029451	0	0
Abca15	0.159671	0.169436	0.187407	0.170728	0.393082	0.18613	0.37709	0.553341	0.0949683	0	0.0635722	0.106396	0.46288	0.271997
Abca16	6.25438	3.95957	4.03973	5.82747	12.9911	7.44862	5.76	10.6451	2.27409	0.748072	3.49516	3.26454	7.80026	5.55498
Abca17	2.03778	0.586377	2.76991	0.499878	4.52653	0.161595	1.354	0.642239	0.665683	0.306109	5.89811	4.36386	8.52914	7.87394
Abca2	19.5057	14.8878	17.8919	16.5406	35.4399	22.2234	22.1858	26.5013	23.8302	19.967	64.9556	81.7996	36.8911	38.645
Abca3	12.1887	7.24967	11.4978	8.88861	20.1533	8.26538	14.5346	13.9529	8.17903	7.18033	33.0784	43.2189	23.041	21.8685
Abca4	0.375118	0.509612	0.216408	0.529466	0.0665064	0.0143934	0.158688	0.140862	0.0362277	0.30316	0.412152	0.393114	0.574391	0.354014
Abca5	6.10119	5.10177	5.19407	5.56105	13.7836	13.6143	9.89995	10.8607	5.24755	3.91109	7.41644	10.2444	12.4395	9.30215
Abca6	0.96319	0.765166	0.785781	0.4455	2.35615	0.436312	0.589613	2.18311	2.56951	4.58424	0.285558	2.85692	3.14293	2.0662
Abca7	3.30212	3.37854	3.97089	2.99701	10.8625	8.32394	7.61288	3.01087	2.93846	2.64369	8.38153	10.4778	11.8569	12.183
Abca8a	0.204869	0.195872	0.360079	0.374608	0	1.05427	0.617064	0.204677	0.412899	0.317331	0.580875	1.01917	0.799317	0.395996
Abca8b	2.76251	1.92567	2.29237	2.84942	4.53924	2.7616	1.96951	3.86205	2.35781	1.81527	0.303822	2.40744	2.58474	2.18454
Abca9	0.196959	0.0288026	0.0724191	0.156413	0	0.0163261	0.152837	0.100454	3.25586	4.97824	0.0351046	0.624909	0.28279	0.0557923
Abcb10	6.48048	3.92104	5.27464	5.81882	12.7299	8.90417	12.4565	11.3316	7.62396	9.48894	17.5221	30.1148	11.4285	9.43097
Abcb11	0.360402	0	0.0562225	0.0556334	0	0	0.484908	0.0258991	0	0	0.0171158	0.0446828	0.716868	0.283616
Abcb1a	0.02158	0.585412	1.1294	1.72219	0.0251989	0	0	0.0246832	0.749869	1.48599	0.10503	0.833596	0.303827	0.298967
Abcb1b	2.22711	2.62213	3.54084	2.45952	1.93913	0.898302	2.3996	3.49461	0.840366	0.848288	3.11708	3.41618	7.35281	7.53939
Abcb4	0.519374	1.09729	1.35136	0.858933	3.67852	2.61099	1.52003	2.32565	0.582476	0.639626	0.468647	0.49682	0.145839	0.834412
Abcb5	0.0803495	0	0	0	0	0	0	0	1.5582	1.20708	0.125148	1.55986	0	0.0883355
Abcb6	15.9718	18.9442	22.5913	17.5489	27.1358	11.2595	14.7564	18.5818	11.3428	10.9534	80.693	77.0089	81.8816	90.1559
Abcb7	13.6229	13.3457	12.5287	13.2359	26.574	17.9451	16.4874	20.8531	17.7765	15.7447	34.9038	30.1875	22.3063	20.8083
Abcb8	13.3274	12.1809	15.5951	14.0184	24.9275	27.259	18.0725	16.6768	32.4042	29.4808	37.07	44.2224	25.3792	23.0083
Abcb9	0.706225	0.537911	0.387971	0.505457	0.821128	0.579481	0.661005	0.41553	0.644155	0.389088	3.18132	4.05901	2.22897	1.69648
Abcc1	29.5619	25.6864	30.0583	34.163	41.0181	31.2913	33.8033	40.4629	24.8761	21.3584	59.1238	77.6735	51.8428	42.0475
Abcc10	4.66186	3.26702	4.24248	3.73456	4.94142	2.75704	3.54272	3.73422	2.99831	4.0174	9.06262	11.4104	5.84791	5.57449
Abcc12	0.0712288	0.250134	0.250918	0.515167	0	1.01821	0.120483	0.0869635	0.151468	0	0.0655757	0.0268451	0.248808	0.0765527
Abcc2	0.0385164	0.0339019	0.186926	0.033635	0.066915	0	0.0488804	0.492957	0.584774	0.776323	0.0403566	0.0510431	0.109534	0
Abcc3	0.451711	1.18082	0.399784	0.798053	0.899671	1.51888	2.06756	0.820069	2.6438	6.09176	1.12523	1.35452	2.24302	1.33306
Abcc4	17.1784	21.1665	24.9961	24.7958	17.1036	8.27076	10.593	22.2677	24.2325	17.9948	45.6536	45.6059	36.706	34.8102
Abcc5	17.5648	15.8026	17.9229	15.8662	24.1043	14.0659	19.4098	14.1885	13.5604	12.0379	57.1715	70.0844	40.2152	39.3865
Abcc6	0.197395	0.0389819	0.330255	0.269486	0.0505853	0	0.316685	0.107698	0.223104	0	0.18708	0.216688	0.203375	0.38487
Abcc8	9.23815	8.79641	11.4754	8.62709	5.27192	6.90702	6.54408	4.08997	4.70359	5.21091	34.4215	23.7669	18.0456	17.2743
Abcc9	0.282695	0.428476	0.492173	0.660187	0.97611	0.789146	0.592264	0.757453	5.19074	5.7039	0.285962	1.32647	0.85032	0.924553
Abcd1	4.2645	2.64105	3.02133	3.01222	6.04747	1.08735	3.1524	4.09881	11.8687	10.8304	4.50289	7.23793	3.46268	2.8007
Abcd2	6.15796	8.56288	6.6286	6.51583	2.79378	2.06678	2.57491	3.87792	2.33478	2.72352	1.57334	2.61981	14.0978	12.4981
Abcd3	11.1825	12.1099	13.1895	12.3604	29.0817	19.3745	18.4621	16.2568	39.2253	33.3002	26.6512	60.1027	26.4026	23.6935
Abcd4	2.90767	2.89469	5.13003	3.33848	5.55813	3.72473	5.23353	3.96844	1.96631	4.91116	5.50567	6.15377	7.50822	6.22009
Abce1	32.8851	43.7924	41.0069	37.9346	57.7238	56.9858	44.7129	62.2163	70.6865	69.9018	152.85	178.911	94.0526	93.6595
Abcf1	85.6401	78.3763	76.8816	77.5782	55.753	56.3	55.5203	53.3207	73.6045	93.5984	136.681	136.628	127.041	125.75
Abcf2	137.178	134.459	122.783	139.536	138.621	199.242	148.226	132.526	81.4431	87.6645	282.802	276.714	211.466	205.165
Abcf3	31.1518	32.908	25.5627	32.0039	31.7311	33.2145	27.5667	29.9726	25.2696	25.8963	60.3676	64.4603	53.7659	54.3911
Abcg1	15.486	13.2638	16.9119	14.154	12.7011	12.3891	15.9213	10.4335	4.45011	4.45305	15.8867	17.8151	19.9321	15.9434
Abcg2	17.5415	19.68	16.0615	18.9903	27.2683	18.5653	19.8934	22.726	20.8442	21.1732	35.0013	36.6996	42.2915	30.466
Abcg3	0.142639	0.407683	0.157797	0.246934	0.828733	0.177311	0.48351	0.0871963	0.171945	0.329434	0.0901563	0.157003	1.06576	0
Abcg4	0.185641	0.245965	0.491099	0.353598	0.784897	0.12376	0.393866	0.644163	6.58508	7.77371	1.48695	2.79563	0.429071	0.812729
Abcg5	0	0	0	0	0	0	0	0	0.0605922	0.730333	0.012058	0.108371	0.257155	0
Abcg8	0.298168	0.065836	0.394316	0.358597	0.426907	0	0.0314248	1.45261	0.299012	0.758503	0.0241198	0.0938111	0.61092	0.650355
Abhd1	1.52372	3.23958	2.06919	2.64739	2.15038	0.552531	3.07729	1.56442	0.516549	0	2.68602	2.91994	0	1.08958
Abhd10	17.6618	16.8044	23.0651	26.9353	30.2987	40.9413	50.8603	27.3458	24.5401	23.177	69.7701	64.6462	45.3222	40.9873
Abhd11	56.6956	50.035	38.2704	35.4378	36.0957	75.151	40.0504	29.3477	32.6611	25.4809	83.5356	69.658	53.6627	62.5927
Abhd11os	1.88082	0.830578	2.06706	2.86074	3.74044	0.937264	0	0.575688	1.23324	0	2.09542	2.35959	2.89808	0
Abhd12	36.0705	25.4464	33.9434	28.0423	41.8462	35.244	36.2084	36.4017	42.8082	48.5298	59.2384	59.1184	43.204	44.9676
Abhd12b	0.127694	0.674691	1.01303	0	0.881926	3.53018	1.29003	0	0.316592	1.22361	0.100053	0.0746699	0	0
Abhd13	10.1338	10.8268	8.65096	11.6012	16.6775	12.4425	13.2843	15.9111	13.1254	14.8077	33.7291	32.6433	24.2846	22.6444
Abhd14a	28.8929	14.4637	12.4203	18.4531	15.7457	8.15355	15.6735	21.1788	14.5609	16.5554	22.9887	22.6926	33.1486	37.8429
Abhd14b	0.433629	0.382784	1.91607	0.606558	2.80301	1.21855	1.98284	1.17121	16.4716	16.6364	0.405617	4.22954	0.810693	0.505978
Abhd15	0.750759	0.695711	0.695443	0.50738	1.70354	1.34134	1.3504	2.00886	0.987649	2.24093	1.04103	1.14663	0.691973	1.34378
Abhd16a	23.1926	31.0554	27.306	18.9407	26.8399	14.7741	21.778	23.6028	26.6815	24.8518	53.9086	55.5057	46.2573	44.5273
Abhd16b	0	0	0	0.117888	0	0	0	0	0	0	0.308856	0.19471	0	0
Abhd17a	24.16	16.4931	20.2112	19.1309	22.2796	16.7388	22.2561	16.9494	23.9854	19.8028	85.261	100.269	60.2068	59.1355
Abhd17b	7.9243	5.77002	5.3758	6.27102	13.3712	10.6645	10.3486	17.8752	15.4945	12.2744	25.3388	28.603	17.6952	15.3517
Abhd17c	33.6618	29.1862	30.1689	30.8026	42.4509	27.4875	32.5664	39.6045	63.1268	44.1645	104.343	95.575	37.4905	40.8666
Abhd18	4.11793	3.62436	2.52203	3.2643	5.76694	7.79496	1.35118	7.547	2.69514	3.49347	4.40091	6.06837	2.51813	4.00447
Abhd2	25.4585	28.8087	32.2648	28.0655	33.7329	40.3656	38.0192	36.171	77.5988	143.215	27.541	42.7294	34.6486	33.6427
Abhd3	8.92096	12.0017	8.72481	11.7801	22.1433	16.9759	10.8674	14.9173	12.2988	14.8085	11.6818	19.5481	20.4805	19.2821
Abhd4	10.7186	11.2347	12.7256	11.2825	21.7083	24.4412	15.9053	10.2305	140.18	165.437	18.1345	100.917	27.3496	30.9591
Abhd5	35.5233	29.5027	25.9938	30.0083	28.6871	31.1216	21.7043	35.7499	31.4477	31.303	34.7531	32.034	29.2208	30.9265
Abhd6	9.79655	10.2792	9.83037	10.8768	11.7079	10.1561	10.1859	12.1403	12.8791	17.9075	13.1955	20.4196	17.0899	16.6631
Abhd8	1.70142	1.34684	1.55886	0.646136	1.69713	1.04066	2.49033	1.04523	4.89663	7.85606	3.48479	10.6895	4.48339	4.45905
Abi1	62.5148	71.0684	71.0946	67.2518	66.6425	66.0361	58.7737	65.3585	56.3479	75.185	123.758	122.014	106.639	96.7255
Abi2	41.6571	40.406	43.3393	41.986	65.38	54.9064	46.3481	70.5074	42.9714	47.0322	31.6297	36.5623	53.2305	47.3786
Abi3	3.11961	3.2851	3.24668	3.2134	5.62234	1.39652	3.15876	3.6387	3.40459	6.29982	3.7995	4.96785	1.8524	2.31696
Abi3bp	4.51948	5.44225	5.0636	4.39533	4.32385	6.29433	1.3157	4.96766	33.8459	32.6618	0.431976	4.37772	3.07453	1.99531
Abl1	24.7898	20.588	20.8913	21.1149	35.4791	22.8533	27.749	32.7868	29.3894	29.4128	45.9419	64.5685	42.9169	41.6807
Abl2	31.1018	30.4217	28.5039	26.9764	50.4768	47.9866	39.4957	41.6861	15.8372	16.9158	46.1813	56.6645	55.606	55.5433
Ablim1	3.35338	4.32095	3.30502	3.38695	5.72629	3.3206	2.4222	2.94901	10.62	7.34593	1.25331	4.89797	5.17126	5.35519
Ablim2	0.380005	0.72107	0.460872	1.01323	3.49264	1.19996	0.593181	0.794044	3.96286	4.32632	2.56341	2.68825	1.42052	0.291292
Ablim3	3.56333	1.41173	1.92678	1.74925	3.67254	3.63548	2.07719	0.746254	0.855261	0.393801	2.13198	2.29905	4.86056	3.32268
Abo	0.0732394	0.256959	0.0645011	0.816691	0.586894	0	0.613628	2.5666	0.086668	0	1.66048	0.938361	0.839148	0.508756
Abr	82.2381	40.8418	65.0845	75.9365	218.6	156.254	177.318	204.809	31.5346	47.0006	33.2787	41.8457	52.291	47.3871
Abra	0	0	0	0.0596371	0.316596	0	0	0	0.262367	0	0.0349042	0.0195353	0.388542	1.17736
Abracl	1.75951	1.54348	1.02741	6.88354	1.3554	2.56261	9.90601	0.721943	9.97854	18.1836	29.4367	43.1302	8.38085	6.42705
Abraxas1	26.0083	22.5708	20.6336	20.915	38.1051	28.7276	30.4736	36.3804	9.13243	8.93415	26.6353	22.5892	52.949	47.6585
Abraxas2	23.0207	25.2287	20.2955	22.926	24.4315	21.1549	25.7501	22.5387	21.3939	21.9073	51.2125	49.2119	40.0486	38.3764
Abt1	22.3426	21.1879	25.004	25.1812	47.5346	36.5556	31.3068	38.5756	16.1272	18.1103	25.235	27.1915	42.6714	40.8106
Abtb1	30.3113	26.6934	31.8571	29.9806	37.3594	34.3683	36.4565	31.9271	8.674	3.84303	44.9719	43.7111	59.0119	58.5089
Abtb2	8.58315	5.93068	5.28263	7.86586	16.3685	12.1978	12.02	14.719	6.661	7.68249	9.97697	27.3531	8.02976	7.54672
Acaa1a	7.5773	11.5511	15.0982	7.95608	11.0975	19.8079	8.78779	6.98032	28.2083	29.475	42.7534	48.8709	33.2549	36.5887
Acaa1b	12.8923	20.397	19.6797	10.5406	6.11648	6.76687	2.12879	1.83714	5.00056	2.14092	23.9707	21.2561	15.2376	16.4023
Acaa2	28.631	26.6842	27.9413	24.8201	28.22	20.0923	23.4121	26.1358	234.046	257.369	28.6988	68.3115	61.8613	60.6765
Acaca	44.7651	41.2278	46.9394	43.2884	63.6938	43.4466	51.9332	57.4337	29.4189	27.5392	76.9375	90.7718	75.9896	68.3378
Acacb	2.97164	1.46608	2.22626	2.67785	8.71073	2.68025	4.36223	5.49513	2.1982	2.32526	3.04822	3.52679	5.17154	4.60433
Acad10	5.51672	5.85236	5.39793	4.83023	4.20429	4.06931	4.0134	7.29112	3.07863	4.271	9.30297	9.34048	12.1539	10.2745
Acad11	10.2111	10.8349	11.4894	8.97516	20.99	25.9093	14.4444	15.136	9.51122	11.0674	19.5531	24.1584	31.7733	29.1873
Acad12	3.8177	2.5001	3.13278	3.97862	3.15414	0.816066	2.64414	1.52013	1.89436	1.30008	15.5787	17.193	11.6591	15.2828
Acad8	6.08108	5.41689	5.93895	9.02316	11.7216	11.5237	8.96617	8.49122	25.2914	30.0133	13.7487	20.3463	8.61201	6.72285
Acad9	23.3508	20.3675	20.6673	22.5454	42.0813	28.9483	28.1227	32.0317	22.9096	24.4246	45.6771	54.5525	57.6293	58.2775
Acadl	11.1958	11.5321	10.4557	15.4827	11.5778	14.0138	12.1114	18.2683	83.5263	92.1181	28.4588	47.9958	32.5468	31.385
Acadm	27.1606	30.8799	39.1701	18.1196	33.9659	33.7147	34.8984	24.5251	75.0858	77.3575	80.8509	80.5066	83.9084	83.237
Acads	5.99427	6.8159	5.91568	6.43094	3.38336	6.65209	3.53839	3.27503	9.05674	15.2846	22.4579	31.9236	24.2757	26.0338
Acadsb	7.64046	10.4291	11.4705	10.1932	13.2992	11.4321	11.1598	11.9984	44.46	48.1103	17.8311	28.7999	16.2013	14.3783
Acadvl	28.8289	23.7555	23.674	26.8034	31.4901	29.2126	24.3356	35.2471	63.8957	70.705	108.734	115.906	37.8754	36.85
Acan	0.881387	0.753808	1.50592	0.935388	1.37218	3.17252	0.804048	3.47997	2.3776	2.6457	9.48061	11.8826	4.05985	4.10995
Acap1	0.27609	0.367611	0.529237	0.605847	3.24852	0.694543	1.29039	1.24275	0.240072	0.0904404	0.474446	1.58517	0.455696	1.83146
Acap2	12.1016	12.2367	13.6268	11.4413	30.1003	28.2009	24.6982	23.2205	11.7681	11.421	13.7899	22.074	24.7431	22.7548
Acap3	18.9959	10.9168	13.7509	11.5549	12.0484	9.26919	10.538	11.4126	13.0391	9.74922	38.6718	41.6918	18.7825	21.9756
Acat1	46.6563	53.8413	50.097	42.9957	48.2868	44.1865	37.7942	43.2536	102.254	115.068	60.8816	65.6123	62.712	56.5543
Acat2	22.5929	33.2644	33.2806	30.5714	27.3806	20.6058	29.2377	42.0275	42.6336	34.8431	124.714	106.997	29.9534	27.923
Acat3	1.0631	1.98821	1.31398	0.806788	2.81133	2.75401	2.41223	2.58221	1.93744	4.4464	3.15724	5.20424	2.65877	3.92359
Acbd3	43.9897	51.0915	44.5267	44.5361	58.7776	64.0169	46.2081	62.6012	56.4603	55.7747	92.6891	92.1399	61.3019	62.6403
Acbd4	0.800395	1.01112	0.353715	1.80517	0	1.32834	1.90006	0	2.49328	4.08187	0.978888	3.8424	0.789893	1.64457
Acbd5	18.4623	24.3779	21.2191	22.041	24.0342	26.1549	17.5801	25.3251	45.4432	40.6584	32.4274	38.4653	25.4497	21.1381
Acbd6	45.1265	43.8944	37.3428	42.0282	34.2898	20.9589	35.0425	47.3381	27.8351	23.6315	121.521	122.768	97.5307	102.001
Acbd7	1.31498	1.1614	1.54153	1.52388	3.48685	0	1.10926	3.21995	2.87408	0	10.0923	6.59884	2.68038	5.00391
Accs	1.84597	1.18803	2.02226	2.32767	3.02708	2.95484	2.09805	2.26162	5.08622	5.9623	1.93593	4.35324	1.86999	1.41645
Accsl	0	0	0.401422	0.264192	0.0797311	0.273954	0.175148	0.840445	0.608372	0	0.23421	0.406866	0	0
Acd	30.1735	27.0443	29.5307	23.276	24.3136	38.1142	34.649	27.6865	27.2717	27.5777	63.8207	52.7407	30.31	38.2863
Ace	12.4174	4.91962	6.60329	9.2512	31.0566	24.753	21.423	35.0562	11.0787	9.75672	15.6185	29.1368	19.2367	19.6484
Ace2	0.658193	0.520832	0.499825	0.261077	0.969602	0.0619617	0.397026	0	0.701223	1.02738	0.17895	0.901094	0.729167	0.857469
Ace3	0.0516344	0	0.137097	0	0	0	0.571458	0	0	0	0.0531026	0.0446344	0	0
Acer1	4.71366	3.43436	5.49427	3.62431	10.3319	5.81328	5.85305	7.57441	3.37596	2.50192	1.59843	1.09316	4.02163	3.05726
Acer2	37.0405	42.0695	33.8879	34.6506	42.6731	37.4403	24.3154	51.7848	14.5402	16.1739	7.92604	9.71343	22.8727	18.7826
Acer3	4.68294	5.15101	5.82388	6.88228	12.5204	11.2158	8.09248	13.4418	7.11529	6.97752	15.6537	14.6024	12.7852	11.5818
Ache	0	0	0.239365	0.188462	0	0	0	0	1.8331	1.56334	0.076584	0.22986	0	0.317348
Acin1	62.6037	69.1323	69.6444	67.5886	97.6086	81.958	72.7806	66.8284	67.3877	78.6957	151.862	167.309	112.836	115.91
Ackr1	0	0	0.401655	0	0	2.3985	0	0	0.281398	0.633809	0.356428	1.3388	0	0.335834
Ackr2	0.0387796	0.582188	0.0342679	0.22875	0.358403	1.12863	0.461655	4.09976	0.284337	0.216627	0.607319	0.559803	0.375671	0.116733
Ackr3	2.32643	2.63422	1.24681	3.30686	2.32042	0.743976	3.16602	2.03658	6.92609	5.17859	4.16665	9.84715	0.639231	0.829615
Ackr4	2.62253	1.42204	2.54017	2.86488	4.25091	2.71579	3.01261	7.04444	2.50216	2.20527	1.21189	2.3305	5.61308	3.32128
Acly	93.2398	92.0359	116.021	84.2066	93.6459	76.2223	109.505	100.238	153.636	176.595	284.67	331.483	211.024	203.997
Acmsd	5.23818	4.07097	4.94956	5.91138	12.4895	6.27105	9.37628	8.69705	5.39802	7.78316	1.51018	1.77084	2.22415	2.21966
Acnat1	33.1987	23.0996	26.7792	31.3949	76.8406	45.4265	37.3143	76.6494	11.3042	16.7389	2.20286	5.65528	8.70016	10.0738
Acnat2	0	0	0	0	0	0	0	0	0	0	0	0	0.414594	0
Aco1	14.6645	10.2608	12.985	10.3723	27.7206	20.2624	23.2141	22.2452	25.9569	27.4855	29.2729	35.257	27.7133	31.4407
Aco2	129.286	114.617	128.758	135.942	132.696	108.366	96.632	129.064	141.341	148.188	347.989	386.107	127.51	125.487
Acod1	0	0	0	0	0	0	0	0	0.270576	0.246931	0.0112117	0.0380599	0	0
Acot1	2.75575	2.06904	2.31899	2.07724	3.10139	3.1749	5.48183	4.78033	32.7661	44.7707	13.8986	23.1932	5.17671	5.16427
Acot10	0.0824492	0	0	0.27878	0	0	0	0	0	0	0.116347	0	0	0
Acot11	2.61264	1.93743	2.10207	2.60616	5.1303	1.99973	3.59364	6.31785	8.33589	9.62315	6.60279	7.21213	2.82848	2.70873
Acot12	0	0	0	0.0630784	0.16689	0	0.363487	0	0.132941	0.202173	0.0194771	0.0874005	0	0
Acot13	135.081	119.682	100.372	106.774	109.071	80.4718	90.2114	119.53	50.7631	75.4187	65.4676	53.4157	239.975	193.024
Acot2	4.74049	4.93726	4.04483	4.73409	11.0539	11.584	7.19854	6.04682	90.6941	108.114	5.01913	8.43906	8.24284	9.46382
Acot3	0.561282	0.0390923	0.260501	0.14824	0.959369	0	0.552883	1.37372	1.20556	0.533815	2.09542	2.36253	1.16651	1.04204
Acot4	0.446224	0.131067	0.131421	0.43124	0.229667	0.693383	0.284562	0	0.715375	0.397971	0.855008	0.959685	0.281185	0.916266
Acot5	0.0936811	0.24839	0	0.24766	0	0	0	0	0.146069	0.20013	1.1407	1.11103	0.491397	0
Acot6	0.727209	0.409981	0.175825	0.175502	2.14945	0.132835	0.184416	2.00669	2.81327	2.32786	1.58635	1.86766	1.90688	1.75146
Acot7	39.3192	33.1348	34.7831	32.6495	31.6488	32.454	38.8628	23.9915	25.4063	31.3872	100.301	80.6633	82.0742	85.0594
Acot8	10.8948	10.1042	9.49666	12.384	19.0124	10.4834	20.2595	13.0169	4.34695	3.78016	15.2858	21.4722	11.332	13.5632
Acot9	37.4964	39.6439	38.3104	36.1271	41.3403	29.0657	31.0511	34.5941	25.9672	22.6382	94.8939	89.9558	161.917	149.523
Acox1	11.6275	9.975	10.8411	14.2055	13.1932	18.4881	11.8892	14.0091	31.4505	34.9816	38.5033	48.28	26.6356	23.2859
Acox2	0	0	0	0	0	0	0	0	0.112398	0.0849053	0.0239113	0.0134605	0	0
Acox3	5.52049	4.53132	6.84299	6.23594	7.15909	4.49173	6.54936	7.71066	28.7769	24.0721	4.28279	7.45545	8.2105	7.48972
Acoxl	0	0	0	0.0339579	0.0448248	0	0.456956	0.0469743	0.199655	0.150348	0.410907	0.630241	0.218735	0.404489
Acp1	30.3153	30.8524	29.8273	23.0658	36.5297	33.5373	35.8275	20.6721	47.3161	60.4861	38.927	39.7316	22.8676	17.8128
Acp2	10.7157	9.75633	10.0549	9.17206	16.712	11.7476	14.6406	13.1825	21.1045	22.0251	14.7178	19.8749	9.52075	9.46034
Acp4	1.05263	0.466509	0.558804	1.56071	0.727304	0.211436	0.896911	1.94677	4.05218	3.31934	0.0491635	0.416056	0	1.59203
Acp5	4.85442	3.25	6.504	3.82859	4.10109	7.89682	8.01123	3.5488	3.80363	4.26102	40.9441	26.9928	8.69988	7.06531
Acp6	57.1848	61.8935	49.4023	42.012	56.0145	33.1964	32.3562	38.9786	20.9281	28.7626	76.6211	71.4377	77.0905	78.303
Acp7	0	0	0.0550477	0.218402	0.7205	0	0	0	0.238555	0	0.543282	6.11883	0.315366	0.590082
Acpp	4.66182	3.55473	4.74135	5.14369	10.2606	5.44523	5.57745	10.5901	1.56573	0.887901	2.8882	2.6766	5.36357	5.37593
Acr	4.74397	2.09627	1.50931	1.34279	4.91142	0.759924	4.72014	3.22916	0.92544	0.530834	0.106334	0.317528	2.12977	0.609052
Acrbp	8.17489	4.16158	3.4896	4.3398	15.9543	20.9266	20.2211	11.9667	4.0733	4.73383	10.264	10.0448	8.50214	7.76625
Acrv1	0.490339	2.26837	0.976221	0.106795	0.854662	0.737957	13.2941	0	2.12013	2.80619	0.168817	0.222411	0	0
Acsbg1	0.965272	2.20926	1.28034	2.83206	0.887937	1.08985	0.581785	0.54067	442.261	465.286	7.72916	91.5611	6.91136	5.78783
Acsbg2	0.533137	0.54012	0.310265	0.271582	1.01346	0.174609	2.05487	0.426217	0.927545	0.836506	0.100096	0.236093	1.48995	1.03669
Acsf2	38.7403	18.6766	28.5847	22.7882	62.3839	32.7771	49.3824	37.3922	39.7189	65.1042	23.4959	30.7801	19.5036	24.0358
Acsf3	5.54591	2.07853	3.25234	4.4849	2.74383	1.37991	4.68613	7.75994	5.98786	7.88585	8.68025	10.1974	9.69868	6.96683
Acsl1	42.3891	35.2863	37.562	39.5881	63.6411	48.0194	42.6056	57.8986	35.8065	31.3656	48.6015	53.2598	44.6155	39.6942
Acsl3	60.6238	72.1313	74.3668	67.0882	72.7559	68.517	69.6295	74.1319	74.0304	65.0451	212.099	162.858	130.879	110.155
Acsl4	5.73137	6.73275	7.43414	7.5259	10.701	7.20156	7.94986	12.2007	7.92427	10.8921	20.5976	30.2348	12.3477	10.6089
Acsl5	1.47199	1.26414	2.65611	1.55679	0.68929	1.0877	0.802094	0.861591	8.1972	9.92964	1.81571	5.21226	1.55851	2.86785
Acsl6	0.089971	0.158152	0.157811	0.432009	0.20713	0	0.757974	0	0.283182	0	0.371915	1.30679	0	0
Acsm1	0	0	0.050735	0	0	0	0	0	0	0	0	0	0	0
Acsm2	5.91896	3.16916	2.90591	4.40211	6.67399	4.94564	3.35409	5.7574	10.6237	16.1946	0.137241	0.555047	3.72536	2.71264
Acsm3	0.2711	0.326704	0.371502	0.231675	1.23679	0.224744	0.899157	0.228559	0.406128	0.910624	0.708109	1.77013	1.00231	0.399013
Acsm4	0.267676	0.0943506	0.0472816	0.0464956	0.555068	0.63945	0	0	0	0	0	0.139435	0.277041	0.169827
Acsm5	0	0	0	0	0	0	0	0	0	0	0.0115715	0	0	0
Acss1	5.76334	3.02449	3.97875	4.84397	16.315	10.6738	13.0004	16.6518	25.4496	27.2737	3.72765	18.0913	6.77591	7.47359
Acss2	14.3102	17.8614	22.6294	17.9414	34.1937	29.5155	20.9181	29.3426	19.4231	10.5347	51.6232	58.4681	49.0726	40.6782
Acss2os	1.91211	4.61065	1.97394	2.72687	8.43446	1.51574	2.84637	1.88924	1.17503	2.98318	0.0864448	0.288614	0	0
Acss3	0.432999	0.0949771	0.238117	0.175104	0.438138	0.375812	0.490181	0.448889	4.87252	4.45593	1.10047	2.77912	1.40169	0.801481
Acta1	0.433188	0	0.429266	0.0757054	0.595676	0.429815	0	0.526718	0.795448	0.694594	0.610055	0.526424	0.456816	0.564428
Acta2	2.07634	7.86323	4.24201	17.3614	0.401883	0.60281	0.438594	0.894857	22.3558	19.5497	4.79582	74.6908	2.33878	2.32186
Actb	896.599	765.418	822.814	779.664	1031.69	1048.43	1220.43	1170.43	1397.18	1672.51	1474.9	1578.6	1541.71	1668.2
Actbl2	0	0	0	0	0	0	0	0	0.048764	0	0.0110937	0	0	0
Actc1	0	0.22882	0.0764523	0	0	0	0	0.105027	0	0	0	0.252928	0	0
Actg1	279.582	261.63	273.182	253.413	199.747	235.082	237.555	285.521	644.036	700.893	1372.3	1539.5	852.89	916.606
Actg2	2.48703	1.75137	0.614949	4.70613	0.45632	3.45547	0.755545	0.242491	0.605709	1.11616	1.07336	4.63419	0.531687	0.647892
Actl10	0.255623	0	0.150352	0	0	0	0.217362	0	3.22641	1.19357	0.182818	0.278426	0	0.391437
Actl11	0.676354	0.119281	0	0.452648	0.251206	0.216318	0.571315	0	0	0.250845	0	0.00782745	0	0
Actl6a	34.914	36.8153	32.6417	32.6582	55.1389	40.5565	37.5662	50.965	36.763	29.3724	146.76	152.593	86.0388	91.3162
Actl6b	0	0.289465	0.649998	0.0708579	0.376763	0	0.208193	0.906256	0.106222	0	0.298926	0.110507	0.797468	0
Actl7a	0	0	0.731987	0.215716	0.475736	0.411936	0.420595	0	0.293417	0	0.127052	0.142343	1.22794	0.582355
Actl7b	0.986937	1.03358	0.79325	0.0776509	0.823877	0.0898662	5.624	4.06386	0.685623	1.36577	0.439153	0.492514	0.413846	0
Actl9	0.931144	0	0	0.082609	0	0	0.55538	0	0.114128	0	0.0470024	0.0537469	0	0
Actn1	6.68541	6.13098	7.27074	6.60714	6.21894	1.99053	4.39536	6.83625	6.47121	9.36821	18.3952	24.4125	20.1585	22.5628
Actn2	21.0161	25.2002	25.1159	24.366	37.8081	47.8564	25.0801	29.5939	2.60198	2.53482	11.2254	9.01419	44.5108	36.8434
Actn3	4.76332	7.86824	7.28144	5.39564	6.98054	7.33604	6.30404	5.45729	1.7306	1.29978	7.13484	6.29676	17.5112	14.9252
Actn4	43.7711	36.8385	43.892	39.388	57.1974	53.678	41.4404	60.2615	52.2788	54.1957	69.344	84.7902	53.3558	51.6842
Actr10	23.2317	24.0963	23.9468	21.1587	28.8392	23.2137	26.4668	20.5231	28.7415	36.9036	66.1257	45.4267	79.0979	64.7099
Actr1a	29.7414	29.092	33.0754	35.5443	27.6825	22.6056	36.4846	42.0794	26.7761	36.9909	35.9614	52.6394	36.4178	35.7161
Actr1b	72.4517	71.3879	72.4042	65.6663	55.6403	54.8803	59.2078	58.842	55.6742	52.9577	73.9253	70.2503	47.4308	48.2921
Actr2	28.1642	32.3688	30.4078	26.6816	37.6667	24.9476	29.6394	25.1642	39.3738	47.3497	64.2137	69.1064	48.7444	43.3038
Actr3	100.412	104.136	110.039	108.654	127.772	120.943	126.881	124.663	135.856	120.821	295.98	295.704	176.138	186.852
Actr3b	21.1644	18.3199	13.7919	12.4578	17.7563	11.1472	18.1516	18.1001	11.6341	11.9103	28.2014	30.6849	18.0573	18.5766
Actr5	7.90615	5.4593	7.36447	8.67769	6.63168	7.22995	5.00996	7.60495	4.56966	3.29127	37.5943	41.5744	25.0688	24.5703
Actr6	36.4063	39.621	35.3081	36.4763	49.7924	62.4512	43.8445	44.191	20.1645	17.3365	84.5818	78.8509	78.6703	77.2615
Actr8	24.2233	22.5911	25.0384	25.8763	42.5045	30.4523	37.0127	37.8441	16.9568	18.3509	44.7484	42.6832	51.4323	46.8062
Actrt1	0	0	0	0	0	0	0	0	0	0	0	0	0	0
Actrt2	0	0	0.15844	0.154855	0	1.3312	0.453522	0	0.112156	0	0	0	0	0
Actrt3	0	0.0543406	0.273287	0.0541866	0	0	0	0.527147	0.155647	0	0.0641769	0.127978	0.342939	0
Acvr1	6.45198	5.47249	9.23636	6.69006	2.56355	0.922983	0.579508	1.18199	66.413	84.6972	9.43296	14.0962	14.6252	11.9025
Acvr1b	27.3823	17.2664	18.5074	19.2969	30.39	30.5287	24.3553	29.3186	9.85487	11.5827	23.936	31.6987	22.7012	20.8756
Acvr1c	0.152487	0.154109	0.227355	0.233308	0.583713	0.174353	0.138924	0.287052	0.511768	0.840702	0.0633098	0.0996304	0.474265	0.0455666
Acvr2a	10.5824	11.3605	11.0993	12.2002	17.4768	15.9492	12.8177	26.1665	19.2519	18.3806	14.5929	18.0843	18.1035	14.3616
Acvr2b	19.2534	16.6444	17.9554	17.5532	28.0257	16.4867	18.8096	23.3615	14.3479	14.2234	33.4992	36.3711	17.7552	17.5775
Acvrl1	0.0310554	0.137587	0	0.108469	0	0	0	0	7.44879	6.13155	0.900238	16.2846	1.17189	0.360381
Acy1	9.14611	12.1303	16.8601	8.64381	4.62123	10.0256	18.5317	4.01203	10.8562	6.98175	51.016	51.2449	33.2268	33.8521
Acy3	23.5082	17.7797	11.7568	13.8259	34.1157	33.0748	23.3344	30.5036	14.6406	25.0848	12.6092	12.6394	21.0863	21.6488
Acyp1	55.28	91.0498	52.7389	56.6825	59.583	68.8873	76.7521	62.8998	47.3218	43.9097	26.3809	22.0454	25.0802	25.4942
Acyp2	2.88742	0.460728	0.461219	2.69931	6.38188	0.520461	2.00468	1.28865	10.9535	17.589	3.27453	9.54799	1.73943	1.01059
Ada	2.88005	3.51567	2.99885	2.43559	2.24385	7.05674	1.58876	3.09707	29.6491	41.7973	0.577917	1.56358	6.06059	4.00727
Adad1	56.0529	47.9749	45.0504	49.7371	68.265	62.2439	49.4874	87.3117	14.1038	14.8889	41.4946	34.2679	70.073	56.2181
Adad2	27.8774	32.7394	32.6431	18.6912	32.7596	37.4438	29.3591	26.3121	1.82349	1.91654	34.5545	32.4317	53.509	56.0314
Adal	24.6321	22.6474	20.6976	23.8833	36.7231	38.9595	36.4821	36.3969	16.3678	18.1633	43.1494	45.5035	51.707	42.5645
Adam10	17.481	15.0393	16.4823	17.9109	31.6095	20.3481	19.4759	25.9299	32.9195	28.3684	84.4797	106.438	46.6514	42.1587
Adam11	1.62414	0.918345	0.723277	1.54657	4.29157	4.44336	3.46782	1.56843	1.61733	1.5549	2.52042	3.14862	0.846551	1.37117
Adam12	1.64069	0.876468	0.701921	1.06441	0.963966	1.51265	0.421578	0.689629	47.3677	46.0529	1.24315	7.65036	1.07652	0.82288
Adam15	19.0544	21.7644	19.4504	23.658	22.546	23.9579	19.5335	23.3647	23.6783	20.7677	61.3227	71.1773	20.3368	19.9586
Adam17	25.5673	29.4214	28.7108	24.1493	48.29	40.8529	39.2028	38.1718	40.7631	41.0336	85.4124	87.7559	51.3504	48.6668
Adam18	0.718046	0.3005	0.0431844	0.0415267	0.394247	0	0.330678	0	0	0	0.0523137	0	0	0.343192
Adam19	7.13074	7.39781	5.39799	7.62628	11.6697	12.7696	9.93515	21.8787	41.4415	39.6901	5.05886	6.64188	6.1375	4.81709
Adam1a	0.58085	0.194841	0.481057	0.604308	0.645726	0	1.62251	0	0.542137	1.25202	0.507668	1.35231	2.88277	1.55412
Adam1b	0.585899	2.12427	0.480419	0.852032	1.01818	0.429041	1.07074	0.382768	0.552694	0.0874001	0.109403	0.101025	1.67161	0.518156
Adam2	0.169465	0.969573	0.149594	0.257486	0.147321	0.547203	0.930952	0.103528	0.157849	0.0787828	0.0681202	0.0128385	0.241875	0.290887
Adam20	0.0849227	0	0.187971	0	0	0	0.696085	0	0	0	0	0	0	0
Adam21	0	0	0	0	0.216118	0.037099	0.221342	0	0.619365	0.270781	0.0521909	0.0697137	0	0
Adam22	15.8659	12.0715	11.7744	12.8899	15.6922	14.5987	6.77098	9.83826	10.6261	8.59947	11.9437	14.6564	17.7979	13.8869
Adam23	9.98687	8.56784	9.4924	11.2862	19.4043	13.1212	11.8011	25.839	43.5374	54.3181	6.3466	6.73519	10.9997	10.4585
Adam24	0.0375893	0.0660576	0	0	0.0870797	0	0.76318	0	0	0	0	0	0	0
Adam25	0.207678	0	0.0735791	0	0	1.85757	1.02761	0	0	0	0	0	0	0
Adam26a	0	0.0389386	0.039224	0	0.0517762	0	1.34416	0	0	0	0	0	0	0
Adam26b	0.324991	0	0	0	0	0	0.123727	0	0	0	0	0	0	0
Adam28	1.37798	1.56496	1.15391	1.12562	2.57798	2.12216	1.74875	1.74338	1.28981	1.95954	0.729159	0.793876	4.34957	2.38904
Adam29	0	0	0	0.0346084	0	0	0.501902	0	0	0	0	0	0	0
Adam3	0.638288	0.842838	0.070661	0.590045	0.972292	0.357359	3.43164	0	0	0	0.021763	0.0855353	0.234726	0.14024
Adam30	0.243153	0.399607	0.0536434	0.685503	0.315796	0.0300741	0.589943	0	1.30816	1.28497	0.258602	0.186555	0.516077	0.100521
Adam32	1.76917	1.38982	0.399102	1.49986	1.7814	1.2965	0.918892	0.181221	0.304261	0.0917812	0.312815	0.224779	0.645788	0.849688
Adam33	1.14755	0.458825	2.06482	0.834084	5.40354	3.45099	4.13124	2.08882	0	0.723951	0.341939	0.728274	0.667157	0.418284
Adam34	0.0873973	0	0	0	0	0	0	0	0	0	0	0	0	0
Adam39	0	0.0800873	0	0	0	0	0.0890327	0	0.493601	0.0837967	0	0	0	0
Adam4	1.35201	0.486509	0.150561	0.149878	0.942237	0.169583	0.997971	0.779003	0.923984	0.677389	0.529318	0.401372	2.29785	1.58309
Adam5	2.32223	3.16882	2.70586	1.46026	2.81659	1.08262	7.02877	0.259021	0.213251	0.642184	0.0814558	0.197239	0	0.321712
Adam6a	0	0	0	0	0	0	0.037247	0	0	0	0	0	0	0
Adam6b	0	0	0.174383	0	0	0	0	0	0	0	0	0	0	0
Adam7	0.0620433	0	0.0548373	0	0.0358516	0.0613792	0	0.0377362	0	0	0.118642	0.0190541	0.187242	0
Adam8	0	0.0314248	0.0314805	0.0312201	0	0	0.0302284	1.34622	3.07868	3.97822	0.331995	1.20174	0.340561	0.418446
Adam9	8.7914	7.85719	6.81529	7.35845	11.3126	10.7954	8.92353	9.95795	9.40616	12.4227	16.0748	26.1175	16.1322	12.3366
Adamdec1	0	0	0	0	0	0	0	0	0.547086	0	0	0.0429255	0	0
Adamts1	0.890139	0.497546	1.26451	0.83681	0.652812	0	0	0.0530487	55.6994	67.2642	1.87286	16.5042	0.724862	1.24244
Adamts10	6.92355	4.03869	5.89548	8.5025	20.2939	13.2241	10.0434	19.1154	6.49033	10.1247	7.46508	18.8739	8.57557	11.0325
Adamts12	0.206264	0.126056	0.139055	0.291598	0.561736	0.460989	0.18292	0.611729	16.2345	18.1303	0.16696	3.07727	0.61825	0.507755
Adamts13	0.747104	0.449178	0.418431	0.463742	0.853771	0.553291	0.280912	1.15836	0.340934	0.0903841	0.0625338	0.242417	0	0.103514
Adamts14	1.91626	1.3931	2.06885	1.88735	0.180751	0.116079	1.01161	0.163592	3.41619	3.08214	9.71389	9.74877	4.32808	4.4503
Adamts15	2.39945	1.44785	1.33158	2.21684	3.04954	2.30014	1.27287	4.89358	0.538081	0.412093	0.739576	1.74643	0.796111	0.664191
Adamts16	0	0.210231	0	0.0750001	0.594961	0	0.0365583	0.105708	0.106604	0.039571	0.245481	4.27602	0	0.0696901
Adamts17	7.31267	3.21124	6.20972	5.00958	18.1725	11.4104	13.6535	20.7481	3.96602	5.34098	4.11388	5.68221	6.71176	4.68205
Adamts18	0.197851	0.332849	0.079379	0.15685	1.53658	0.358108	0.0457155	0.461714	0.115412	0.316425	0.355571	0.342083	0.308631	0.427916
Adamts19	1.52371	2.21777	2.03176	2.16113	1.73436	0.69722	0.573998	2.20461	3.95673	2.12764	6.79943	6.85318	3.29769	3.81778
Adamts2	5.72353	5.91206	6.26286	5.70642	11.6777	8.38582	8.6411	10.9361	18.4705	17.6509	1.88107	14.4404	6.8248	5.0672
Adamts20	2.85328	2.00012	3.02826	1.94928	4.64126	1.12823	2.86963	2.54781	0.51951	0.358284	1.2681	1.36594	3.14654	3.34208
Adamts3	2.98005	1.69851	1.98885	2.1684	6.50076	5.55805	4.19195	6.21321	1.7082	1.57131	3.58748	4.51463	4.39058	4.10329
Adamts4	2.68125	2.38837	2.34742	2.89847	3.50462	2.49479	2.92868	3.91809	5.28546	6.38558	1.23919	3.57162	1.58725	2.26223
Adamts5	0.34254	0.379828	0.392005	0.647565	0.425925	0.327254	0.321531	0.186319	31.3597	26.4204	1.635	21.7211	0.391936	0.41535
Adamts6	0.412822	1.08975	1.39638	0.994816	1.89455	0.672524	1.34514	0.540217	2.92413	2.29144	0.843308	2.37539	2.16561	1.98537
Adamts7	1.00971	0.412894	1.24202	2.83751	2.40773	1.94844	1.30046	1.3735	7.89302	8.11157	4.74268	12.9882	3.57735	3.12099
Adamts8	0.216838	0.575548	1.28156	0.485643	1.23153	0.120825	0.265444	1.00457	0.154359	0.986482	1.36039	2.98617	0.728428	0.301993
Adamts9	1.3395	1.47898	1.81755	1.47701	3.45201	4.81311	2.21898	1.46095	12.8532	15.1156	2.15245	18.3617	4.92613	3.22612
Adamtsl1	0.147046	0.106294	0.141693	0.304326	0.647104	0.39967	0.135681	0.0326358	0.737185	0.588012	0.259856	1.0076	0.627745	0.381098
Adamtsl2	0	0	0	0	0	0	0	0	0.801122	1.12266	0.232275	2.93078	0	0
Adamtsl3	0.230009	0.10123	0.252985	0.100301	0.645462	0.228782	0.218613	0	0.249557	0.245205	0.235878	0.448944	0.38324	0.18256
Adamtsl4	2.15941	1.02006	2.37097	1.21639	4.12326	3.47355	3.11319	1.63133	5.83155	6.9459	2.84965	3.54464	2.16831	2.60696
Adamtsl5	0	0.166465	0.364855	0.229389	0	0	0	0	0.758595	1.16302	1.1491	2.67199	0	0
Adap1	9.53865	5.80769	8.90445	5.13961	2.02951	7.63833	2.52122	0.477081	2.33299	1.71371	12.5274	11.0188	23.5571	21.705
Adap2	0.154854	0.548038	0.274148	0.403728	0	0.155299	0.395634	0	2.70567	3.3807	0.26634	0.528959	0	0
Adar	24.5262	18.4141	20.2041	19.4578	24.6167	14.2067	17.1906	22.0033	8.02656	7.00697	46.2513	50.0834	38.9822	35.1622
Adarb1	13.1555	11.4909	9.07709	12.357	14.9573	16.3948	11.837	14.5776	5.83219	5.56525	22.0375	20.9571	17.0576	16.1337
Adarb2	2.52964	2.38858	3.02264	2.12352	3.54986	3.25265	3.48247	3.27073	2.15708	3.24949	1.00285	1.83436	4.11481	3.88637
Adat1	24.1914	24.3628	21.3588	19.7781	27.9275	22.1602	20.1722	31.2934	7.50842	10.8985	12.902	14.4669	32.6519	27.3466
Adat2	2.84805	4.86953	3.66965	8.27254	5.72162	2.93405	6.76935	9.57617	4.77116	3.82758	8.45158	9.83848	12.9575	9.15672
[truncated: 22,982 more rows]
