# Supplementary material for: DAZL mediates a broad translational program regulating expansion and differentiation of spermatogonial progenitors
Source: eLife journal article supplement (doi:10.7554/elife.56523), 2020-07-20
Supplement: supp [file elife-56523-supp-v1.zip › elife_poa_e56523_Figure_2_source_data_2.xlsx]

## Sheet: Description
Figure 2 - source data 2
Tab Name	Description
iCLIP library stats	Number of reads from each DAZL and IgG iCLIP library
Replicated 3' UTR peaks	Peaks identified in at least 2 of 3 biological replicates. Peaks called by ASPeak and filtered for FDR<0.05. Genes were further filtered for TPM ≥ 1 in RNA-seq data from undifferentiated spermatogonia. Maximum_Height, Tag_Count, and p-Value are from the biological replicate with the maximum value for these fields.
Replicated 5' UTR peaks	Peaks identified in at least 2 of 3 biological replicates. Peaks called by ASPeak and filtered for FDR<0.05. Genes were further filtered for TPM ≥ 1 in RNA-seq data from undifferentiated spermatogonia. Maximum_Height, Tag_Count, and p-Value are from the biological replicate with the maximum value for these fields.
Replicated CDS peaks	Peaks identified in at least 2 of 3 biological replicates. Peaks called by ASPeak and filtered for FDR<0.05. Genes were further filtered for TPM ≥ 1 in RNA-seq data from undifferentiated spermatogonia. Maximum_Height, Tag_Count, and p-Value are from the biological replicate with the maximum value for these fields.
Replciated ncRNA peaks	Peaks identified in at least 2 of 3 biological replicates. Peaks called by ASPeak and filtered for FDR<0.05. Genes were further filtered for TPM ≥ 1 in RNA-seq data from undifferentiated spermatogonia. Maximum_Height, Tag_Count, and p-Value are from the biological replicate with the maximum value for these fields.
Replicated retrogene peaks	Peaks identified in at least 2 of 3 biological replicates. Peaks called by ASPeak and filtered for FDR<0.05. Genes were further filtered for TPM ≥ 1 in RNA-seq data from undifferentiated spermatogonia. Maximum_Height, Tag_Count, and p-Value are from the biological replicate with the maximum value for these fields.
3S undiff gonia TPMs	TPMs at the transcript and gene level for all expressed genes (mean gene-level TPM ≥ 1). TPMs were calculated for protein-coding transcripts, non-coding transcripts, and retrogenes. For a gene with coding and noncoding isoforms, the gene-level TPM was calculated separately.

## Sheet: iCLIP library stats
DAZL iCLIP libraries
	Replicate 1	Replicate 2	Replicate 3	Total
Sequenced reads passing quality trimming	11367956	9983767	13806424	35158147
Reads after removal of PCR duplicates	1276786	892093	2023992	4192871
Reads uniquely mapped by STAR	845409	591201	1137829	2574439
IgG iCLIP libraries
	Replicate 1	Replicate 2	Replicate 3	Total
Sequenced reads passing quality trimming	537932	718977	134487	1391396
Reads after removal of PCR duplicates	52739	48304	14926	115969
Reads uniquely mapped by STAR	28622	24226	9303	62151

## Sheet: Replicated 3' UTR peaks
Chr	Start	End	Interval	Maximum_Height	Strand	Interval_Length	Tag_Count	Span_Size	RPKM	p-Value
chr7	116104576	116104577	1110004F10Rik_NM_019772_utr3_4_0_chr7_116104440_f	12	+	771	12	1	0	0.00153
chr7	116105136	116105137	1110004F10Rik_NM_019772_utr3_4_0_chr7_116104440_f	11	+	771	15	1	0	0.0061
chr15	76950700	76950701	1110038F14Rik_NM_001347540_utr3_4_0_chr15_76950389_f,1110038F14Rik_NM_054099_utr3_3_0_chr15_76950389_f	10	+	591	10	1	0	0.00108
chr4	124849564	124849565	1110065P20Rik_NM_001142727_utr3_0_0_chr4_124849485_r,1110065P20Rik_NM_001347196_utr3_0_0_chr4_124849485_r	11	-	382	11	1	0.0915763	0.000903
chr9	94517927	94517928	1190002N15Rik_NM_001033145_utr3_0_0_chr9_94517864_r	4	-	2451	4	1	0	0.00999
chr9	94518981	94518982	1190002N15Rik_NM_001033145_utr3_0_0_chr9_94517864_r	5	-	2451	5	1	0	0.00999
chr9	94518985	94518986	1190002N15Rik_NM_001033145_utr3_0_0_chr9_94517864_r	6	-	2451	6	1	0	0.00999
chr9	94519000	94519001	1190002N15Rik_NM_001033145_utr3_0_0_chr9_94517864_r	7	-	2451	7	1	0	0.00999
chr9	94519046	94519047	1190002N15Rik_NM_001033145_utr3_0_0_chr9_94517864_r	8	-	2451	8	1	0	0.00473
chr9	94519847	94519848	1190002N15Rik_NM_001033145_utr3_0_0_chr9_94517864_r	6	-	2451	9	1	0	0.00294
chr9	94519863	94519864	1190002N15Rik_NM_001033145_utr3_0_0_chr9_94517864_r	5	-	2451	5	1	0	0.00999
chr9	94519903	94519904	1190002N15Rik_NM_001033145_utr3_0_0_chr9_94517864_r	5	-	2451	5	1	0	0.00821
chr9	94519916	94519917	1190002N15Rik_NM_001033145_utr3_0_0_chr9_94517864_r	8	-	2451	8	1	0	0.00821
chr9	94519918	94519919	1190002N15Rik_NM_001033145_utr3_0_0_chr9_94517864_r	11	-	2451	17	1	0	0.00535
chr9	94519938	94519939	1190002N15Rik_NM_001033145_utr3_0_0_chr9_94517864_r	10	-	2451	18	1	0	0.000939
chr8	72460513	72460514	1700030K09Rik_NM_028170_utr3_7_0_chr8_72460152_f	32	+	390	37	1	0	0.0011
chr8	72460520	72460521	1700030K09Rik_NM_028170_utr3_7_0_chr8_72460152_f	10	+	390	15	1	0	0.00685
chr1	57385232	57385233	1700066M21Rik_NM_028546_utr3_1_0_chr1_57383565_f	6	+	1858	6	1	0.0867384	0.000718
chr16	8856399	8856400	1810013L24Rik_NM_001081400_utr3_3_0_chr16_8856039_f	5	+	2886	9	1	0	0.00612
chr16	8857002	8857003	1810013L24Rik_NM_001081400_utr3_3_0_chr16_8856039_f	5	+	2886	5	1	0	0.00652
chr16	8857480	8857481	1810013L24Rik_NM_001081400_utr3_3_0_chr16_8856039_f	6	+	2886	6	1	0	0.00652
chr16	8857502	8857503	1810013L24Rik_NM_001081400_utr3_3_0_chr16_8856039_f	13	+	2886	13	1	0	0.00124
chr16	8857509	8857510	1810013L24Rik_NM_001081400_utr3_3_0_chr16_8856039_f	5	+	2886	5	1	0	0.00652
chr16	8857517	8857518	1810013L24Rik_NM_001081400_utr3_3_0_chr16_8856039_f	6	+	2886	6	1	0	0.00395
chr16	8857631	8857632	1810013L24Rik_NM_001081400_utr3_3_0_chr16_8856039_f	13	+	2886	13	1	0	0.00395
chr16	8857651	8857653	1810013L24Rik_NM_001081400_utr3_3_0_chr16_8856039_f	11	+	2886	21	2	0	0.00612
chr16	8857655	8857656	1810013L24Rik_NM_001081400_utr3_3_0_chr16_8856039_f	4	+	2886	4	1	0	0.0087
chr16	8858157	8858158	1810013L24Rik_NM_001081400_utr3_3_0_chr16_8856039_f	7	+	2886	12	1	0	0.0024
chr1	37611707	37611708	2010300C02Rik_NM_028096_utr3_0_0_chr1_37611676_r	6	-	581	6	1	0	0.000536
chr7	131343309	131343310	2310057M21Rik_NM_026655_utr3_0_0_chr7_131342718_r	7	-	852	7	1	0	0.00282
chr7	131343419	131343420	2310057M21Rik_NM_026655_utr3_0_0_chr7_131342718_r	8	-	852	12	1	0	0.000689
chr4	147946933	147946934	2510039O18Rik_NM_029841_utr3_2_0_chr4_147946619_f	5	+	696	5	1	0	0.00804
chr4	147946986	147946987	2510039O18Rik_NM_029841_utr3_2_0_chr4_147946619_f	6	+	696	6	1	0	0.00521
chr4	147946993	147946994	2510039O18Rik_NM_029841_utr3_2_0_chr4_147946619_f	13	+	696	20	1	0	0.00252
chr6	13869991	13869992	2610001J05Rik_NM_001352887_utr3_0_0_chr6_13867735_r	6	-	2797	6	1	0	0.000234
chr4	10898629	10898630	2610301B20Rik_NM_026005_utr3_5_0_chr4_10898053_f	15	+	1371	15	1	0.0266374	0.000149
chr4	10898732	10898733	2610301B20Rik_NM_026005_utr3_5_0_chr4_10898053_f	7	+	1371	7	1	0.0266374	0.00101
chr13	119486070	119486071	4833420G17Rik_NM_001113550_utr3_12_0_chr13_119485918_f,4833420G17Rik_NM_026127_utr3_13_0_chr13_119485918_f	5	+	200	5	1	0	0.00753
chr13	54551391	54551392	4833439L19Rik_NM_001252645_utr3_0_0_chr13_54551218_r,4833439L19Rik_NM_001252646_utr3_0_0_chr13_54551218_r,4833439L19Rik_NM_001252647_utr3_0_0_chr13_54551218_r,4833439L19Rik_NM_001252648_utr3_0_0_chr13_54551218_r,4833439L19Rik_NM_133797_utr3_0_0_chr13_54551218_r	8	-	1394	8	1	0.0192059	0.000433
chr13	54551572	54551573	4833439L19Rik_NM_001252645_utr3_0_0_chr13_54551218_r,4833439L19Rik_NM_001252646_utr3_0_0_chr13_54551218_r,4833439L19Rik_NM_001252647_utr3_0_0_chr13_54551218_r,4833439L19Rik_NM_001252648_utr3_0_0_chr13_54551218_r,4833439L19Rik_NM_133797_utr3_0_0_chr13_54551218_r	5	-	1394	5	1	0.0192059	0.00119
chr14	8431311	8431312	4930452B06Rik_NM_028934_utr3_0_0_chr14_8431172_r	4	-	434	4	1	0.0616889	0.00167
chr14	8431382	8431383	4930452B06Rik_NM_028934_utr3_0_0_chr14_8431172_r	10	-	434	10	1	0.0616889	0.00116
chrX	58919948	58919949	4930550L24Rik_NM_023774_utr3_1_0_chrX_58919846_f	18	+	459	18	1	0	0.00334
chr3	79632352	79632353	4930579G24Rik_NM_029482_utr3_1_0_chr3_79631285_f	7	+	1535	7	1	0	0.00497
chr3	79632654	79632655	4930579G24Rik_NM_029482_utr3_1_0_chr3_79631285_f	11	+	1535	11	1	0	0.00374
chr7	34237837	34237838	4931406P16Rik_NM_172741_utr3_0_0_chr7_34236714_r	4	-	2215	4	1	0.0720384	0.00165
chr8	105280678	105280679	4931428F04Rik_NM_001166394_utr3_0_0_chr8_105280409_r,4931428F04Rik_NM_028888_utr3_0_0_chr8_105280409_r	6	-	1571	6	1	0.0111337	0.00147
chr3	37052775	37052776	4932438A13Rik_NM_172679_utr3_85_0_chr3_37052541_f	12	+	493	12	1	0	0.00843
chr3	37052904	37052905	4932438A13Rik_NM_172679_utr3_85_0_chr3_37052541_f	11	+	493	16	1	0	0.00379
chr10	116112162	116112163	4933416C03Rik_NM_001161855_utr3_0_0_chr10_116111664_r	7	-	819	15	1	0	0.000739
chr10	116112171	116112172	4933416C03Rik_NM_001161855_utr3_0_0_chr10_116111664_r	5	-	819	5	1	0	0.00357
chr13	105121747	105121748	4933425L06Rik_NM_025751_utr3_7_0_chr13_105121422_f	7	+	361	7	1	0	0.00111
chr15	84948027	84948028	5031439G07Rik_NM_001033273_utr3_0_0_chr15_84945720_r	6	-	3518	6	1	0	0.000114
chr11	52407254	52407255	9530068E07Rik_NM_153117_utr3_2_0_chr11_52407077_f	6	+	1647	10	1	0.0326169	0.0012
chr11	52407344	52407345	9530068E07Rik_NM_153117_utr3_2_0_chr11_52407077_f	9	+	1647	9	1	0.0326169	0.0012
chr19	29715359	29715360	9930021J03Rik_NM_172836_utr3_0_0_chr19_29714402_r	8	-	1606	12	1	0	0.00361
chr19	29715376	29715377	9930021J03Rik_NM_172836_utr3_0_0_chr19_29714402_r	5	-	1606	5	1	0	0.00361
chr19	29715505	29715506	9930021J03Rik_NM_172836_utr3_0_0_chr19_29714402_r	4	-	1606	4	1	0	0.00954
chr19	29715682	29715683	9930021J03Rik_NM_172836_utr3_0_0_chr19_29714402_r	8	-	1606	13	1	0	0.000288
chr19	29715740	29715741	9930021J03Rik_NM_172836_utr3_0_0_chr19_29714402_r	5	-	1606	5	1	0	0.00584
chr1	74279881	74279882	Aamp_NM_001190444_utr3_0_0_chr1_74279840_r,Aamp_NM_146110_utr3_0_0_chr1_74279840_r	11	-	394	11	1	0	0.00272
chr1	74279938	74279939	Aamp_NM_001190444_utr3_0_0_chr1_74279840_r,Aamp_NM_146110_utr3_0_0_chr1_74279840_r	11	-	394	11	1	0	0.00259
chr9	4296246	4296247	Aasdhppt_NM_001326359_utr3_0_0_chr9_4294793_r,Aasdhppt_NM_026276_utr3_0_0_chr9_4294793_r	6	-	1882	6	1	0	0.000882
chr4	53030826	53030829	Abca1_NM_013454_utr3_0_0_chr4_53030789_r	18	-	3154	31	3	0.0140343	0.000612
chr4	53030911	53030914	Abca1_NM_013454_utr3_0_0_chr4_53030789_r	52	-	3154	71	3	0.0140343	0.000216
chr4	53030919	53030921	Abca1_NM_013454_utr3_0_0_chr4_53030789_r	24	-	3154	40	2	0.0140343	5.51e-05
chr4	53030922	53030924	Abca1_NM_013454_utr3_0_0_chr4_53030789_r	20	-	3154	41	2	0.0140343	0.000347
chr4	53030927	53030928	Abca1_NM_013454_utr3_0_0_chr4_53030789_r	16	-	3154	16	1	0.0140343	0.000604
chr4	53031190	53031191	Abca1_NM_013454_utr3_0_0_chr4_53030789_r	8	-	3154	8	1	0.0140343	0.001
chr4	53031235	53031236	Abca1_NM_013454_utr3_0_0_chr4_53030789_r	14	-	3154	14	1	0.0140343	0.000584
chr4	53031595	53031596	Abca1_NM_013454_utr3_0_0_chr4_53030789_r	7	-	3154	7	1	0.0140343	0.00145
chr4	53031636	53031639	Abca1_NM_013454_utr3_0_0_chr4_53030789_r	18	-	3154	38	3	0.0140343	0.000162
chr4	53031671	53031673	Abca1_NM_013454_utr3_0_0_chr4_53030789_r	12	-	3154	16	2	0.0140343	0.00145
chr4	53031678	53031679	Abca1_NM_013454_utr3_0_0_chr4_53030789_r	18	-	3154	18	1	0.0140343	0.000248
chr4	53031683	53031684	Abca1_NM_013454_utr3_0_0_chr4_53030789_r	4	-	3154	4	1	0.0140343	0.00172
chr4	53032033	53032034	Abca1_NM_013454_utr3_0_0_chr4_53030789_r	11	-	3154	11	1	0.0140343	0.000162
chr4	53032880	53032881	Abca1_NM_013454_utr3_0_0_chr4_53030789_r	5	-	3154	5	1	0.0140343	0.00172
chr4	53032966	53032967	Abca1_NM_013454_utr3_0_0_chr4_53030789_r	13	-	3154	13	1	0.0140343	0.000255
chr16	20332252	20332253	Abcc5_NM_013790_utr3_0_0_chr16_20331304_r	8	-	1300	8	1	0.0340493	0.000844
chr3	121760145	121760146	Abcd3_NM_001355756_utr3_0_0_chr3_121758904_r,Abcd3_NM_008991_utr3_0_0_chr3_121758904_r	12	-	1328	17	1	0	0.000357
chr10	80583735	80583736	Abhd17a_NM_145421_utr3_0_0_chr10_80583649_r	14	-	189	14	1	0.283312	0.000778
chr7	84109491	84109492	Abhd17c_NM_133722_utr3_0_0_chr7_84109356_r	8	-	1226	8	1	0	0.00253
chr7	84109731	84109732	Abhd17c_NM_133722_utr3_0_0_chr7_84109356_r	12	-	1226	30	1	0	0.000512
chr7	84109768	84109769	Abhd17c_NM_133722_utr3_0_0_chr7_84109356_r	9	-	1226	16	1	0	0.00398
chr7	84109799	84109800	Abhd17c_NM_133722_utr3_0_0_chr7_84109356_r	10	-	1226	10	1	0	0.00645
chr7	84109962	84109963	Abhd17c_NM_133722_utr3_0_0_chr7_84109356_r	9	-	1226	9	1	0	0.00296
chr7	79361255	79361256	Abhd2_NM_018811_utr3_10_0_chr7_79360157_f	7	+	1445	7	1	0	0.000423
chr2	22940394	22940395	Abi1_NM_001077190_utr3_0_0_chr2_22940074_r,Abi1_NM_001077192_utr3_0_0_chr2_22940074_r,Abi1_NM_001077193_utr3_0_0_chr2_22940074_r,Abi1_NM_001331043_utr3_0_0_chr2_22940074_r,Abi1_NM_001331044_utr3_0_0_chr2_22940074_r,Abi1_NM_001331045_utr3_0_0_chr2_22940074_r,Abi1_NM_007380_utr3_0_0_chr2_22940074_r,Abi1_NM_145994_utr3_0_0_chr2_22940074_r	8	-	1798	8	1	0.239829	0.000315
chr2	22940437	22940438	Abi1_NM_001077190_utr3_0_0_chr2_22940074_r,Abi1_NM_001077192_utr3_0_0_chr2_22940074_r,Abi1_NM_001077193_utr3_0_0_chr2_22940074_r,Abi1_NM_001331043_utr3_0_0_chr2_22940074_r,Abi1_NM_001331044_utr3_0_0_chr2_22940074_r,Abi1_NM_001331045_utr3_0_0_chr2_22940074_r,Abi1_NM_007380_utr3_0_0_chr2_22940074_r,Abi1_NM_145994_utr3_0_0_chr2_22940074_r	5	-	1798	5	1	0.239829	0.000892
chr2	22940609	22940610	Abi1_NM_001077190_utr3_0_0_chr2_22940074_r,Abi1_NM_001077192_utr3_0_0_chr2_22940074_r,Abi1_NM_001077193_utr3_0_0_chr2_22940074_r,Abi1_NM_001331043_utr3_0_0_chr2_22940074_r,Abi1_NM_001331044_utr3_0_0_chr2_22940074_r,Abi1_NM_001331045_utr3_0_0_chr2_22940074_r,Abi1_NM_007380_utr3_0_0_chr2_22940074_r,Abi1_NM_145994_utr3_0_0_chr2_22940074_r	5	-	1798	5	1	0.239829	0.00124
chr2	22941447	22941449	Abi1_NM_001077190_utr3_0_0_chr2_22940074_r,Abi1_NM_001077192_utr3_0_0_chr2_22940074_r,Abi1_NM_001077193_utr3_0_0_chr2_22940074_r,Abi1_NM_001331043_utr3_0_0_chr2_22940074_r,Abi1_NM_001331044_utr3_0_0_chr2_22940074_r,Abi1_NM_001331045_utr3_0_0_chr2_22940074_r,Abi1_NM_007380_utr3_0_0_chr2_22940074_r,Abi1_NM_145994_utr3_0_0_chr2_22940074_r	7	-	1798	9	2	0.239829	0.000892
chr2	22941774	22941775	Abi1_NM_001077190_utr3_0_0_chr2_22940074_r,Abi1_NM_001077192_utr3_0_0_chr2_22940074_r,Abi1_NM_001077193_utr3_0_0_chr2_22940074_r,Abi1_NM_001331043_utr3_0_0_chr2_22940074_r,Abi1_NM_001331044_utr3_0_0_chr2_22940074_r,Abi1_NM_001331045_utr3_0_0_chr2_22940074_r,Abi1_NM_007380_utr3_0_0_chr2_22940074_r,Abi1_NM_145994_utr3_0_0_chr2_22940074_r	9	-	1798	9	1	0.239829	0.000196
chr2	22941800	22941801	Abi1_NM_001077190_utr3_0_0_chr2_22940074_r,Abi1_NM_001077192_utr3_0_0_chr2_22940074_r,Abi1_NM_001077193_utr3_0_0_chr2_22940074_r,Abi1_NM_001331043_utr3_0_0_chr2_22940074_r,Abi1_NM_001331044_utr3_0_0_chr2_22940074_r,Abi1_NM_001331045_utr3_0_0_chr2_22940074_r,Abi1_NM_007380_utr3_0_0_chr2_22940074_r,Abi1_NM_145994_utr3_0_0_chr2_22940074_r	6	-	1798	6	1	0.239829	0.00124
chr2	31803398	31803399	Abl1_NM_001112703_utr3_10_0_chr2_31801900_f,Abl1_NM_001283045_utr3_10_0_chr2_31801900_f,Abl1_NM_001283046_utr3_11_0_chr2_31801900_f,Abl1_NM_001283047_utr3_11_0_chr2_31801900_f,Abl1_NM_009594_utr3_10_0_chr2_31801900_f	39	+	2463	46	1	0.0218108	0.000602
chr2	31803483	31803484	Abl1_NM_001112703_utr3_10_0_chr2_31801900_f,Abl1_NM_001283045_utr3_10_0_chr2_31801900_f,Abl1_NM_001283046_utr3_11_0_chr2_31801900_f,Abl1_NM_001283047_utr3_11_0_chr2_31801900_f,Abl1_NM_009594_utr3_10_0_chr2_31801900_f	5	+	2463	5	1	0.0218108	0.00265
chr1	156649422	156649423	Abl2_NM_001136104_utr3_12_0_chr1_156642717_f,Abl2_NM_009595_utr3_11_0_chr1_156642717_f	9	+	6903	9	1	0.0158713	0.00105
chr1	156649447	156649448	Abl2_NM_001136104_utr3_12_0_chr1_156642717_f,Abl2_NM_009595_utr3_11_0_chr1_156642717_f	5	+	6903	5	1	0.0158713	0.00195
chr5	100805838	100805839	Abraxas1_NM_172405_utr3_0_0_chr5_100804802_r	5	-	1257	5	1	0.0630439	0.00166
chr5	100805962	100805963	Abraxas1_NM_172405_utr3_0_0_chr5_100804802_r	4	-	1257	4	1	0.0630439	0.00166
chr5	100806005	100806006	Abraxas1_NM_172405_utr3_0_0_chr5_100804802_r	4	-	1257	8	1	0.0630439	0.00166
chr3	153922462	153922463	Acadm_NM_007382_utr3_0_0_chr3_153922353_r	9	-	578	9	1	0	0.000553
chr1	180752484	180752485	Acbd3_NM_133225_utr3_7_0_chr1_180752371_f	6	+	1834	6	1	0	0.00824
chr1	180752486	180752487	Acbd3_NM_133225_utr3_7_0_chr1_180752371_f	12	+	1834	12	1	0	0.00526
chr1	180752899	180752900	Acbd3_NM_133225_utr3_7_0_chr1_180752371_f	32	+	1834	32	1	0	0.000148
chr1	180753701	180753702	Acbd3_NM_133225_utr3_7_0_chr1_180752371_f	15	+	1834	15	1	0	0.00816
chr1	180753706	180753707	Acbd3_NM_133225_utr3_7_0_chr1_180752371_f	8	+	1834	8	1	0	0.00816
chr1	180753791	180753792	Acbd3_NM_133225_utr3_7_0_chr1_180752371_f	6	+	1834	6	1	0	0.00737
chr1	180754067	180754068	Acbd3_NM_133225_utr3_7_0_chr1_180752371_f	8	+	1834	8	1	0	0.00386
chr11	100476386	100476387	Acly_NM_001199296_utr3_0_0_chr11_100476352_r,Acly_NM_134037_utr3_0_0_chr11_100476352_r	97	-	892	97	1	0	0.00138
chr11	100476680	100476681	Acly_NM_001199296_utr3_0_0_chr11_100476352_r,Acly_NM_134037_utr3_0_0_chr11_100476352_r	29	-	892	29	1	0	0.0076
chr11	100476718	100476719	Acly_NM_001199296_utr3_0_0_chr11_100476352_r,Acly_NM_134037_utr3_0_0_chr11_100476352_r	42	-	892	84	1	0	0.00815
chr11	100476725	100476726	Acly_NM_001199296_utr3_0_0_chr11_100476352_r,Acly_NM_134037_utr3_0_0_chr11_100476352_r	85	-	892	85	1	0	0.00109
chr11	100476793	100476795	Acly_NM_001199296_utr3_0_0_chr11_100476352_r,Acly_NM_134037_utr3_0_0_chr11_100476352_r	135	-	892	180	2	0	0.000236
chr4	40197846	40197847	Aco1_NM_007386_utr3_20_0_chr4_40197668_f	4	+	1342	4	1	0	0.00391
chr15	81914969	81914970	Aco2_NM_080633_utr3_17_0_chr15_81914763_f	5	+	375	9	1	1.49536	0.000533
chr8	46535967	46535968	Acsl1_NM_001302163_utr3_20_0_chr8_46534481_f,Acsl1_NM_007981_utr3_20_0_chr8_46534481_f	5	+	1571	5	1	0.0232463	0.00187
chr1	78706737	78706738	Acsl3_NM_001033606_utr3_14_0_chr1_78706416_f,Acsl3_NM_001136222_utr3_13_0_chr1_78706416_f,Acsl3_NM_028817_utr3_15_0_chr1_78706416_f	15	+	1328	15	1	0	0.00308
chr1	78706752	78706754	Acsl3_NM_001033606_utr3_14_0_chr1_78706416_f,Acsl3_NM_001136222_utr3_13_0_chr1_78706416_f,Acsl3_NM_028817_utr3_15_0_chr1_78706416_f	14	+	1328	25	2	0	0.00152
chr1	78706759	78706760	Acsl3_NM_001033606_utr3_14_0_chr1_78706416_f,Acsl3_NM_001136222_utr3_13_0_chr1_78706416_f,Acsl3_NM_028817_utr3_15_0_chr1_78706416_f	34	+	1328	34	1	0	0.000468
chr1	78706801	78706802	Acsl3_NM_001033606_utr3_14_0_chr1_78706416_f,Acsl3_NM_001136222_utr3_13_0_chr1_78706416_f,Acsl3_NM_028817_utr3_15_0_chr1_78706416_f	19	+	1328	22	1	0	0.00119
chr1	78706822	78706823	Acsl3_NM_001033606_utr3_14_0_chr1_78706416_f,Acsl3_NM_001136222_utr3_13_0_chr1_78706416_f,Acsl3_NM_028817_utr3_15_0_chr1_78706416_f	8	+	1328	8	1	0	0.00887
chr2	155562712	155562713	Acss2_NM_019811_utr3_17_0_chr2_155562081_f	12	+	663	16	1	0.0550828	0.000323
chr5	142903277	142903279	Actb_NM_007393_utr3_0_0_chr5_142903115_r	15	-	683	32	2	0.141636	2.54e-06
chr5	142903283	142903286	Actb_NM_007393_utr3_0_0_chr5_142903115_r	13	-	683	32	3	0.141636	2.66e-06
chr5	142903317	142903319	Actb_NM_007393_utr3_0_0_chr5_142903115_r	8	-	683	25	2	0.141636	0.000711
chr5	142903336	142903337	Actb_NM_007393_utr3_0_0_chr5_142903115_r	9	-	683	9	1	0.141636	0.000369
chr5	142903486	142903487	Actb_NM_007393_utr3_0_0_chr5_142903115_r	8	-	683	10	1	0.141636	0.00015
chr5	142903488	142903489	Actb_NM_007393_utr3_0_0_chr5_142903115_r	9	-	683	20	1	0.141636	0.000696
chr5	142903490	142903491	Actb_NM_007393_utr3_0_0_chr5_142903115_r	9	-	683	20	1	0.141636	0.00015
chr3	32726911	32726913	Actl6a_NM_019673_utr3_13_0_chr3_32726603_f	16	+	369	28	2	1.52542	5.38e-06
chr12	80168099	80168100	Actn1_NM_001346669_utr3_0_0_chr12_80167542_r,Actn1_NM_134156_utr3_0_0_chr12_80167542_r	47	-	780	47	1	0	0.000287
chr12	70962153	70962154	Actr10_NM_019785_utr3_12_0_chr12_70962049_f	7	+	2669	7	1	0	0.000141
chr10	89712211	89712212	Actr6_NM_025914_utr3_0_0_chr10_89711973_r	7	-	458	7	1	0	0.00583
chr10	89712275	89712276	Actr6_NM_025914_utr3_0_0_chr10_89711973_r	10	-	458	10	1	0	0.00174
chr9	119434968	119434969	Acvr2b_NM_001313757_utr3_10_0_chr9_119433462_f,Acvr2b_NM_007397_utr3_9_0_chr9_119433462_f	8	+	8687	8	1	0.0685115	0.00101
chr9	119434981	119434983	Acvr2b_NM_001313757_utr3_10_0_chr9_119433462_f,Acvr2b_NM_007397_utr3_9_0_chr9_119433462_f	10	+	8687	15	2	0.0685115	0.000144
chr2	121155938	121155939	Adal_NM_001290811_utr3_9_0_chr2_121155548_f,Adal_NM_001290812_utr3_8_0_chr2_121155548_f,Adal_NM_001355748_utr3_8_0_chr2_121155548_f,Adal_NM_029475_utr3_9_0_chr2_121155548_f	6	+	1133	6	1	0	0.00197
chr9	70779959	70779960	Adam10_NM_007399_utr3_15_0_chr9_70778095_f	6	+	2135	6	1	0	0.00701
chr19	53245937	53245938	Add3_NM_001164099_utr3_14_0_chr19_53245291_f,Add3_NM_001164100_utr3_13_0_chr19_53245291_f,Add3_NM_001164101_utr3_13_0_chr19_53245291_f,Add3_NM_001277100_utr3_14_0_chr19_53245291_f,Add3_NM_013758_utr3_15_0_chr19_53245291_f	5	+	2036	5	1	0	0.00205
chr19	53247057	53247058	Add3_NM_001164099_utr3_14_0_chr19_53245291_f,Add3_NM_001164100_utr3_13_0_chr19_53245291_f,Add3_NM_001164101_utr3_13_0_chr19_53245291_f,Add3_NM_001277100_utr3_14_0_chr19_53245291_f,Add3_NM_013758_utr3_15_0_chr19_53245291_f	4	+	2036	4	1	0	0.0028
chr5	49960090	49960091	Adgra3_NM_133911_utr3_0_0_chr5_49959951_r	10	-	321	10	1	0	0.00392
chr8	95014083	95014084	Adgrg1_NM_001198894_utr3_13_0_chr8_95012988_f,Adgrg1_NM_018882_utr3_13_0_chr8_95012988_f	8	+	1221	8	1	0	0.000671
chr12	28681585	28681586	Adi1_NM_134052_utr3_3_0_chr12_28681086_f	5	+	1089	5	1	0.0335353	0.0016
chr12	28681637	28681638	Adi1_NM_134052_utr3_3_0_chr12_28681086_f	7	+	1089	12	1	0.0335353	0.00119
chr6	119354248	119354249	Adipor2_NM_001355692_utr3_0_0_chr6_119353150_r,Adipor2_NM_197985_utr3_0_0_chr6_119353150_r	5	-	2650	5	1	0.0132008	0.00151
chr14	21448114	21448115	Adk_NM_001243041_utr3_10_0_chr14_21447939_f,Adk_NM_134079_utr3_10_0_chr14_21447939_f	8	+	631	8	1	0	0.00241
chr14	21448188	21448189	Adk_NM_001243041_utr3_10_0_chr14_21447939_f,Adk_NM_134079_utr3_10_0_chr14_21447939_f	5	+	631	10	1	0	0.00684
chr2	168181031	168181032	Adnp_NM_001310086_utr3_0_0_chr2_168180965_r,Adnp_NM_001310088_utr3_0_0_chr2_168180965_r,Adnp_NM_009628_utr3_0_0_chr2_168180965_r	8	-	1082	8	1	0	0.00152
chr2	168181056	168181057	Adnp_NM_001310086_utr3_0_0_chr2_168180965_r,Adnp_NM_001310088_utr3_0_0_chr2_168180965_r,Adnp_NM_009628_utr3_0_0_chr2_168180965_r	4	-	1082	4	1	0	0.00888
chr2	168181506	168181507	Adnp_NM_001310086_utr3_0_0_chr2_168180965_r,Adnp_NM_001310088_utr3_0_0_chr2_168180965_r,Adnp_NM_009628_utr3_0_0_chr2_168180965_r	7	-	1082	11	1	0	0.00552
chr10	67547039	67547041	Ado_NM_001005419_utr3_0_0_chr10_67544511_r	5	-	3492	9	2	0	0.0016
chr16	38445434	38445435	Adprh_NM_007414_utr3_0_0_chr16_38445399_r	57	-	291	57	1	0	0.000808
chr16	38445518	38445519	Adprh_NM_007414_utr3_0_0_chr16_38445399_r	22	-	291	22	1	0	0.00716
chr16	38445529	38445530	Adprh_NM_007414_utr3_0_0_chr16_38445399_r	37	-	291	37	1	0	0.00826
chr1	177763873	177763874	Adss_NM_007422_utr3_0_0_chr1_177763178_r	8	-	1067	8	1	0	0.00556
chr1	177763934	177763935	Adss_NM_007422_utr3_0_0_chr1_177763178_r	13	-	1067	13	1	0	0.00444
chr6	140651522	140651523	Aebp2_NM_001005605_utr3_7_0_chr6_140650787_f,Aebp2_NM_001309436_utr3_8_0_chr6_140651362_f,Aebp2_NM_001309437_utr3_8_0_chr6_140651362_f,Aebp2_NM_178803_utr3_7_0_chr6_140650787_f	6	+	4695	6	1	0.00886406	0.00146
chr6	140652745	140652746	Aebp2_NM_001005605_utr3_7_0_chr6_140650787_f,Aebp2_NM_001309436_utr3_8_0_chr6_140651362_f,Aebp2_NM_001309437_utr3_8_0_chr6_140651362_f,Aebp2_NM_178803_utr3_7_0_chr6_140650787_f	11	+	4695	11	1	0.00886406	0.000561
chr17	13904569	13904570	Afdn_NM_010806_utr3_32_0_chr17_13904008_f	10	+	1787	10	1	0	0.00239
chr17	13905720	13905721	Afdn_NM_010806_utr3_32_0_chr17_13904008_f	9	+	1787	9	1	0	0.00296
chr1	38177356	38177358	Aff3_NM_001290814_utr3_0_0_chr1_38175991_r	20	-	3458	29	2	0	0.00142
chr1	38178163	38178166	Aff3_NM_001290814_utr3_0_0_chr1_38175991_r	50	-	3458	75	3	0	3.32e-05
chr1	38178167	38178170	Aff3_NM_001290814_utr3_0_0_chr1_38175991_r	23	-	3458	48	3	0	0.00111
chr1	38178177	38178178	Aff3_NM_001290814_utr3_0_0_chr1_38175991_r	20	-	3458	29	1	0	0.00657
chr1	38178195	38178196	Aff3_NM_001290814_utr3_0_0_chr1_38175991_r	11	-	3458	19	1	0	0.00657
chr1	38178200	38178201	Aff3_NM_001290814_utr3_0_0_chr1_38175991_r	11	-	3458	11	1	0	0.00984
chr1	38178214	38178215	Aff3_NM_001290814_utr3_0_0_chr1_38175991_r	21	-	3458	21	1	0	0.00693
chr1	38178397	38178398	Aff3_NM_001290814_utr3_0_0_chr1_38175991_r	40	-	3458	57	1	0	0.00693
chr1	38178409	38178410	Aff3_NM_001290814_utr3_0_0_chr1_38175991_r	20	-	3458	29	1	0	0.00455
chr18	67404882	67404883	Afg3l2_NM_027130_utr3_0_0_chr18_67404764_r	7	-	514	7	1	0	0.0011
chr8	53523374	53523375	Aga_NM_001005847_utr3_8_0_chr8_53523277_f,Aga_NM_001205054_utr3_8_0_chr8_53523277_f	7	+	146	7	1	0	0.00267
chr1	82895135	82895136	Agfg1_NM_001310713_utr3_11_0_chr1_82895059_f,Agfg1_NM_001347077_utr3_12_0_chr1_82895059_f,Agfg1_NM_010472_utr3_12_0_chr1_82895059_f	6	+	5943	6	1	0	0.000298
chr8	18882117	18882118	Agpat5_NM_026792_utr3_7_0_chr8_18881964_f	7	+	2450	7	1	0	0.00197
chr8	18882229	18882231	Agpat5_NM_026792_utr3_7_0_chr8_18881964_f	8	+	2450	13	2	0	0.00127
chr2	75926153	75926154	Agps_NM_172666_utr3_19_0_chr2_75926044_f	11	+	5307	11	1	0	0.000337
chr2	75926269	75926270	Agps_NM_172666_utr3_19_0_chr2_75926044_f	6	+	5307	11	1	0	0.000886
chr2	75926329	75926330	Agps_NM_172666_utr3_19_0_chr2_75926044_f	4	+	5307	4	1	0	0.00235
chr2	75927137	75927138	Agps_NM_172666_utr3_19_0_chr2_75926044_f	6	+	5307	6	1	0	0.00204
chr1	179746147	179746148	Ahctf1_NM_026375_utr3_0_0_chr1_179744904_r	13	-	1429	13	1	0	0.000501
chr1	179746183	179746184	Ahctf1_NM_026375_utr3_0_0_chr1_179744904_r	10	-	1429	10	1	0	0.0014
chr3	107664545	107664546	Ahcyl1_NM_001357110_utr3_0_0_chr3_107663120_r,Ahcyl1_NM_001357111_utr3_0_0_chr3_107663120_r,Ahcyl1_NM_001357112_utr3_0_0_chr3_107663120_r,Ahcyl1_NM_001357113_utr3_0_0_chr3_107663120_r,Ahcyl1_NM_145542_utr3_0_0_chr3_107663120_r	6	-	1987	6	1	0	0.00484
chr4	133077385	133077386	Ahdc1_NM_146155_utr3_6_0_chr4_133076987_f	9	+	1124	9	1	0	0.00195
chr4	133077593	133077594	Ahdc1_NM_146155_utr3_6_0_chr4_133076987_f	20	+	1124	21	1	0	0.000218
chr10	21079621	21079622	Ahi1_NM_001177776_utr3_6_0_chr10_21079087_f,Ahi1_NM_026203_utr3_23_0_chr10_21079087_f	12	+	1343	12	1	0	0.00331
chr10	21079627	21079628	Ahi1_NM_001177776_utr3_6_0_chr10_21079087_f,Ahi1_NM_026203_utr3_23_0_chr10_21079087_f	19	+	1343	19	1	0	0.00123
chr10	21079717	21079718	Ahi1_NM_001177776_utr3_6_0_chr10_21079087_f,Ahi1_NM_026203_utr3_23_0_chr10_21079087_f	7	+	1343	7	1	0	0.00381
chr11	23489402	23489403	Ahsa2_NM_001290654_utr3_0_0_chr11_23487882_r,Ahsa2_NM_001290655_utr3_0_0_chr11_23487882_r,Ahsa2_NM_172391_utr3_0_0_chr11_23487882_r	6	-	2670	11	1	0	0.00238
chr11	23489418	23489419	Ahsa2_NM_001290654_utr3_0_0_chr11_23487882_r,Ahsa2_NM_001290655_utr3_0_0_chr11_23487882_r,Ahsa2_NM_172391_utr3_0_0_chr11_23487882_r	8	-	2670	12	1	0	0.00347
chr11	23489449	23489450	Ahsa2_NM_001290654_utr3_0_0_chr11_23487882_r,Ahsa2_NM_001290655_utr3_0_0_chr11_23487882_r,Ahsa2_NM_172391_utr3_0_0_chr11_23487882_r	13	-	2670	18	1	0	0.00238
chr11	23489539	23489540	Ahsa2_NM_001290654_utr3_0_0_chr11_23487882_r,Ahsa2_NM_001290655_utr3_0_0_chr11_23487882_r,Ahsa2_NM_172391_utr3_0_0_chr11_23487882_r	7	-	2670	7	1	0	0.00166
chr1	43115633	43115634	AI597479_NM_133818_utr3_3_0_chr1_43113243_f	6	+	2704	6	1	0	0.000998
chr1	43115850	43115851	AI597479_NM_133818_utr3_3_0_chr1_43113243_f	8	+	2704	15	1	0	0.00146
chr10	13647449	13647450	Aig1_NM_001347362_utr3_0_0_chr10_13647055_r	15	-	614	15	1	0	0.00109
chr14	54567809	54567810	Ajuba_NM_010590_utr3_0_0_chr14_54567469_r	9	-	1462	9	1	0	0.00173
chr4	129011490	129011491	Ak2_NM_016895_utr3_6_0_chr4_129010568_f	7	+	962	7	1	0	0.00071
chr4	101466866	101466867	Ak4_NM_001177602_utr3_5_0_chr4_101463668_f,Ak4_NM_001177604_utr3_5_0_chr4_101463668_f,Ak4_NM_001177605_utr3_5_0_chr4_101463668_f,Ak4_NM_009647_utr3_4_0_chr4_101463668_f	15	+	4104	15	1	0	0.000394
chr4	101466924	101466925	Ak4_NM_001177602_utr3_5_0_chr4_101463668_f,Ak4_NM_001177604_utr3_5_0_chr4_101463668_f,Ak4_NM_001177605_utr3_5_0_chr4_101463668_f,Ak4_NM_009647_utr3_4_0_chr4_101463668_f	6	+	4104	6	1	0	0.00314
chr4	101466929	101466930	Ak4_NM_001177602_utr3_5_0_chr4_101463668_f,Ak4_NM_001177604_utr3_5_0_chr4_101463668_f,Ak4_NM_001177605_utr3_5_0_chr4_101463668_f,Ak4_NM_009647_utr3_4_0_chr4_101463668_f	7	+	4104	7	1	0	0.00101
chr4	101466934	101466935	Ak4_NM_001177602_utr3_5_0_chr4_101463668_f,Ak4_NM_001177604_utr3_5_0_chr4_101463668_f,Ak4_NM_001177605_utr3_5_0_chr4_101463668_f,Ak4_NM_009647_utr3_4_0_chr4_101463668_f	11	+	4104	11	1	0	0.000462
chr14	78492307	78492308	Akap11_NM_001164503_utr3_0_0_chr14_78492246_r,Akap11_NM_001346784_utr3_0_0_chr14_78492246_r	10	-	3530	10	1	0.0125394	0.000386
chr14	78495022	78495024	Akap11_NM_001164503_utr3_0_0_chr14_78492246_r,Akap11_NM_001346784_utr3_0_0_chr14_78492246_r	13	-	3530	24	2	0.0125394	0.000987
chr14	78495031	78495032	Akap11_NM_001164503_utr3_0_0_chr14_78492246_r,Akap11_NM_001346784_utr3_0_0_chr14_78492246_r	8	-	3530	13	1	0.0125394	0.000956
chr14	78495246	78495247	Akap11_NM_001164503_utr3_0_0_chr14_78492246_r,Akap11_NM_001346784_utr3_0_0_chr14_78492246_r	7	-	3530	7	1	0.0125394	0.00165
chr14	78495286	78495287	Akap11_NM_001164503_utr3_0_0_chr14_78492246_r,Akap11_NM_001346784_utr3_0_0_chr14_78492246_r	19	-	3530	19	1	0.0125394	0.000119
chr14	78495299	78495300	Akap11_NM_001164503_utr3_0_0_chr14_78492246_r,Akap11_NM_001346784_utr3_0_0_chr14_78492246_r	20	-	3530	20	1	0.0125394	8.26e-06
chr14	78495310	78495311	Akap11_NM_001164503_utr3_0_0_chr14_78492246_r,Akap11_NM_001346784_utr3_0_0_chr14_78492246_r	10	-	3530	10	1	0.0125394	0.000956
chr14	78495314	78495315	Akap11_NM_001164503_utr3_0_0_chr14_78492246_r,Akap11_NM_001346784_utr3_0_0_chr14_78492246_r	8	-	3530	15	1	0.0125394	0.000386
chr14	78495323	78495324	Akap11_NM_001164503_utr3_0_0_chr14_78492246_r,Akap11_NM_001346784_utr3_0_0_chr14_78492246_r	12	-	3530	12	1	0.0125394	0.000258
chr14	78495332	78495333	Akap11_NM_001164503_utr3_0_0_chr14_78492246_r,Akap11_NM_001346784_utr3_0_0_chr14_78492246_r	10	-	3530	14	1	0.0125394	0.000149
chr14	78495585	78495586	Akap11_NM_001164503_utr3_0_0_chr14_78492246_r,Akap11_NM_001346784_utr3_0_0_chr14_78492246_r	15	-	3530	15	1	0.0125394	0.000175
chr14	78495642	78495643	Akap11_NM_001164503_utr3_0_0_chr14_78492246_r,Akap11_NM_001346784_utr3_0_0_chr14_78492246_r	12	-	3530	12	1	0.0125394	0.000594
chr14	78495649	78495651	Akap11_NM_001164503_utr3_0_0_chr14_78492246_r,Akap11_NM_001346784_utr3_0_0_chr14_78492246_r	17	-	3530	22	2	0.0125394	6.34e-05
chr14	78495753	78495754	Akap11_NM_001164503_utr3_0_0_chr14_78492246_r,Akap11_NM_001346784_utr3_0_0_chr14_78492246_r	7	-	3530	7	1	0.0125394	0.000594
chr7	75751456	75751457	Akap13_NM_029332_utr3_36_0_chr7_75750624_f	5	+	3986	5	1	0.154159	0.000886
chr7	75751960	75751961	Akap13_NM_029332_utr3_36_0_chr7_75750624_f	7	+	3986	9	1	0.154159	0.000235
chr7	75752022	75752023	Akap13_NM_029332_utr3_36_0_chr7_75750624_f	8	+	3986	8	1	0.154159	0.00052
chrX	36608344	36608345	Akap17b_NM_001081956_utr3_0_0_chrX_36608183_r	6	-	2790	6	1	0.0158652	0.00102
chrX	36608442	36608443	Akap17b_NM_001081956_utr3_0_0_chrX_36608183_r	8	-	2790	8	1	0.0158652	0.000397
chr17	32304917	32304919	Akap8_NM_019774_utr3_0_0_chr17_32303672_r	6	-	1585	11	2	0	0.00047
chr4	123736292	123736293	Akirin1_NM_023423_utr3_0_0_chr4_123735195_r	4	-	1659	4	1	0.016138	0.00163
chr4	123736322	123736325	Akirin1_NM_023423_utr3_0_0_chr4_123735195_r	20	-	1659	48	3	0.016138	4.36e-05
chr4	123736328	123736331	Akirin1_NM_023423_utr3_0_0_chr4_123735195_r	12	-	1659	25	3	0.016138	0.00097
chr4	123736489	123736490	Akirin1_NM_023423_utr3_0_0_chr4_123735195_r	10	-	1659	15	1	0.016138	0.000348
chr4	34566256	34566257	Akirin2_NM_001007589_utr3_4_0_chr4_34566226_f	10	+	683	10	1	0.585065	0.000145
chr4	34566493	34566494	Akirin2_NM_001007589_utr3_4_0_chr4_34566226_f	11	+	683	16	1	0.585065	4.92e-05
chr4	34566819	34566820	Akirin2_NM_001007589_utr3_4_0_chr4_34566226_f	8	+	683	10	1	0.585065	8.82e-05
chr4	34566846	34566847	Akirin2_NM_001007589_utr3_4_0_chr4_34566226_f	6	+	683	9	1	0.585065	0.000242
chr4	34566878	34566879	Akirin2_NM_001007589_utr3_4_0_chr4_34566226_f	8	+	683	8	1	0.585065	0.000145
chr1	177024396	177024397	Akt3_NM_011785_utr3_0_0_chr1_177022115_r	8	-	3249	8	1	0.0190074	0.00187
chr1	177024426	177024427	Akt3_NM_011785_utr3_0_0_chr1_177022115_r	10	-	3249	10	1	0.0190074	0.000677
chr9	71295991	71295992	Aldh1a2_NM_009022_utr3_13_0_chr9_71295611_f	10	+	633	10	1	0	0.000622
chr11	61244932	61244933	Aldh3a2_NM_001331114_utr3_0_0_chr11_61244752_r,Aldh3a2_NM_001331115_utr3_0_0_chr11_61244752_r,Aldh3a2_NM_007437_utr3_0_0_chr11_61244752_r	12	-	1570	12	1	0	0.00132
chr11	61244961	61244962	Aldh3a2_NM_001331114_utr3_0_0_chr11_61244752_r,Aldh3a2_NM_001331115_utr3_0_0_chr11_61244752_r,Aldh3a2_NM_007437_utr3_0_0_chr11_61244752_r	9	-	1570	9	1	0	0.00131
chr18	56526783	56526784	Aldh7a1_NM_001127338_utr3_0_0_chr18_56525736_r,Aldh7a1_NM_138600_utr3_0_0_chr18_56525736_r	5	-	1217	5	1	0	0.000253
chr15	90228485	90228486	Alg10b_NM_001033441_utr3_2_0_chr15_90228380_f	6	+	2175	6	1	0	0.00545
chr15	90229531	90229532	Alg10b_NM_001033441_utr3_2_0_chr15_90228380_f	4	+	2175	4	1	0	0.00769
chr15	90230400	90230401	Alg10b_NM_001033441_utr3_2_0_chr15_90228380_f	12	+	2175	12	1	0	0.000372
chr4	47469868	47469869	Alg2_NM_001355496_utr3_0_0_chr4_47469833_r,Alg2_NM_019998_utr3_0_0_chr4_47469833_r	5	-	1726	5	1	0.0101339	0.00167
chr4	47469879	47469880	Alg2_NM_001355496_utr3_0_0_chr4_47469833_r,Alg2_NM_019998_utr3_0_0_chr4_47469833_r	5	-	1726	9	1	0.0101339	0.00198
chr4	47469917	47469918	Alg2_NM_001355496_utr3_0_0_chr4_47469833_r,Alg2_NM_019998_utr3_0_0_chr4_47469833_r	10	-	1726	15	1	0.0101339	0.0012
chr4	47469927	47469928	Alg2_NM_001355496_utr3_0_0_chr4_47469833_r,Alg2_NM_019998_utr3_0_0_chr4_47469833_r	4	-	1726	4	1	0.0101339	0.00198
chr12	87428153	87428154	Alkbh1_NM_001102565_utr3_0_0_chr12_87428078_r	4	-	763	8	1	0	0.000947
chr11	60554471	60554473	Alkbh5_NM_172943_utr3_3_0_chr11_60554416_f	11	+	4097	12	2	0.0262241	0.00146
chr11	60554476	60554477	Alkbh5_NM_172943_utr3_3_0_chr11_60554416_f	21	+	4097	21	1	0.0262241	0.000162
chr11	60554489	60554491	Alkbh5_NM_172943_utr3_3_0_chr11_60554416_f	11	+	4097	17	2	0.0262241	0.00152
chr11	60554498	60554499	Alkbh5_NM_172943_utr3_3_0_chr11_60554416_f	26	+	4097	31	1	0.0262241	2.3e-05
chr11	60554501	60554502	Alkbh5_NM_172943_utr3_3_0_chr11_60554416_f	11	+	4097	31	1	0.0262241	0.00294
chr11	60554509	60554510	Alkbh5_NM_172943_utr3_3_0_chr11_60554416_f	8	+	4097	8	1	0.0262241	0.0014
chr11	60554517	60554520	Alkbh5_NM_172943_utr3_3_0_chr11_60554416_f	12	+	4097	37	3	0.0262241	0.00152
chr11	60554527	60554528	Alkbh5_NM_172943_utr3_3_0_chr11_60554416_f	9	+	4097	9	1	0.0262241	0.00294
chr11	60554539	60554540	Alkbh5_NM_172943_utr3_3_0_chr11_60554416_f	6	+	4097	6	1	0.0262241	0.0014
chr11	60554581	60554582	Alkbh5_NM_172943_utr3_3_0_chr11_60554416_f	18	+	4097	18	1	0.0262241	0.00152
chr11	60554633	60554634	Alkbh5_NM_172943_utr3_3_0_chr11_60554416_f	12	+	4097	16	1	0.0262241	0.00152
chr11	60554687	60554688	Alkbh5_NM_172943_utr3_3_0_chr11_60554416_f	19	+	4097	19	1	0.0262241	0.00152
chr11	60554708	60554710	Alkbh5_NM_172943_utr3_3_0_chr11_60554416_f	22	+	4097	28	2	0.0262241	0.000495
chr11	60554715	60554716	Alkbh5_NM_172943_utr3_3_0_chr11_60554416_f	53	+	4097	53	1	0.0262241	6.38e-08
chr11	60554728	60554729	Alkbh5_NM_172943_utr3_3_0_chr11_60554416_f	53	+	4097	60	1	0.0262241	5.71e-06
chr11	60554736	60554737	Alkbh5_NM_172943_utr3_3_0_chr11_60554416_f	22	+	4097	30	1	0.0262241	1.52e-05
chr11	60554760	60554761	Alkbh5_NM_172943_utr3_3_0_chr11_60554416_f	4	+	4097	4	1	0.0262241	0.00294
chr11	60554924	60554925	Alkbh5_NM_172943_utr3_3_0_chr11_60554416_f	5	+	4097	5	1	0.0262241	0.00294
chr11	60554992	60554993	Alkbh5_NM_172943_utr3_3_0_chr11_60554416_f	9	+	4097	9	1	0.0262241	0.00152
chr11	60555106	60555107	Alkbh5_NM_172943_utr3_3_0_chr11_60554416_f	5	+	4097	9	1	0.0262241	0.00223
chr11	60555137	60555138	Alkbh5_NM_172943_utr3_3_0_chr11_60554416_f	11	+	4097	11	1	0.0262241	0.000289
chr11	60555172	60555174	Alkbh5_NM_172943_utr3_3_0_chr11_60554416_f	10	+	4097	12	2	0.0262241	0.000495
chr11	60555210	60555211	Alkbh5_NM_172943_utr3_3_0_chr11_60554416_f	14	+	4097	18	1	0.0262241	0.000705
chr11	60555217	60555218	Alkbh5_NM_172943_utr3_3_0_chr11_60554416_f	16	+	4097	17	1	0.0262241	0.00098
chr11	60555245	60555246	Alkbh5_NM_172943_utr3_3_0_chr11_60554416_f	6	+	4097	6	1	0.0262241	0.00152
chr11	60555250	60555251	Alkbh5_NM_172943_utr3_3_0_chr11_60554416_f	7	+	4097	7	1	0.0262241	0.0014
chr11	60555258	60555260	Alkbh5_NM_172943_utr3_3_0_chr11_60554416_f	15	+	4097	22	2	0.0262241	0.000372
chr11	60555296	60555297	Alkbh5_NM_172943_utr3_3_0_chr11_60554416_f	4	+	4097	4	1	0.0262241	0.00294
chr11	60555677	60555678	Alkbh5_NM_172943_utr3_3_0_chr11_60554416_f	4	+	4097	4	1	0.0262241	0.00294
chr11	60555771	60555772	Alkbh5_NM_172943_utr3_3_0_chr11_60554416_f	7	+	4097	7	1	0.0262241	0.00223
chr11	60555785	60555786	Alkbh5_NM_172943_utr3_3_0_chr11_60554416_f	7	+	4097	7	1	0.0262241	0.001
chr11	60555790	60555791	Alkbh5_NM_172943_utr3_3_0_chr11_60554416_f	9	+	4097	10	1	0.0262241	0.000529
chr11	60555795	60555796	Alkbh5_NM_172943_utr3_3_0_chr11_60554416_f	8	+	4097	8	1	0.0262241	0.0014
chr11	60555802	60555806	Alkbh5_NM_172943_utr3_3_0_chr11_60554416_f	15	+	4097	64	4	0.0262241	9.95e-05
chr11	60555807	60555808	Alkbh5_NM_172943_utr3_3_0_chr11_60554416_f	14	+	4097	64	1	0.0262241	8.67e-05
chr1	59162960	59162961	Als2_NM_001159948_utr3_0_0_chr1_59162756_r,Als2_NM_028717_utr3_0_0_chr1_59162756_r	9	-	1421	9	1	0	0.000905
chr1	59162987	59162988	Als2_NM_001159948_utr3_0_0_chr1_59162756_r,Als2_NM_028717_utr3_0_0_chr1_59162756_r	10	-	1421	14	1	0	0.00173
chr8	93971844	93971845	Amfr_NM_011787_utr3_0_0_chr8_93971588_r	7	-	1579	7	1	0.0339113	0.000874
chr8	93971953	93971954	Amfr_NM_011787_utr3_0_0_chr8_93971588_r	7	-	1579	7	1	0.0339113	0.000886
chr8	93972074	93972075	Amfr_NM_011787_utr3_0_0_chr8_93971588_r	7	-	1579	12	1	0.0339113	0.00036
chr8	93972089	93972090	Amfr_NM_011787_utr3_0_0_chr8_93971588_r	9	-	1579	14	1	0.0339113	0.000449
chr8	93972101	93972102	Amfr_NM_011787_utr3_0_0_chr8_93971588_r	19	-	1579	19	1	0.0339113	1.01e-05
chr8	93972103	93972104	Amfr_NM_011787_utr3_0_0_chr8_93971588_r	7	-	1579	18	1	0.0339113	0.00142
chr18	31782546	31782547	Ammecr1l_NM_001242430_utr3_7_0_chr18_31780756_f,Ammecr1l_NM_153515_utr3_7_0_chr18_31780756_f	5	+	3328	5	1	0.308606	0.00147
chr18	31782712	31782714	Ammecr1l_NM_001242430_utr3_7_0_chr18_31780756_f,Ammecr1l_NM_153515_utr3_7_0_chr18_31780756_f	24	+	3328	30	2	0.308606	3.32e-05
chr18	31782820	31782821	Ammecr1l_NM_001242430_utr3_7_0_chr18_31780756_f,Ammecr1l_NM_153515_utr3_7_0_chr18_31780756_f	8	+	3328	8	1	0.308606	0.00147
chr18	31782878	31782881	Ammecr1l_NM_001242430_utr3_7_0_chr18_31780756_f,Ammecr1l_NM_153515_utr3_7_0_chr18_31780756_f	8	+	3328	23	3	0.308606	0.00147
chr18	31783574	31783575	Ammecr1l_NM_001242430_utr3_7_0_chr18_31780756_f,Ammecr1l_NM_153515_utr3_7_0_chr18_31780756_f	9	+	3328	12	1	0.308606	0.000948
chr18	31783613	31783614	Ammecr1l_NM_001242430_utr3_7_0_chr18_31780756_f,Ammecr1l_NM_153515_utr3_7_0_chr18_31780756_f	6	+	3328	6	1	0.308606	0.00147
chr18	31783645	31783646	Ammecr1l_NM_001242430_utr3_7_0_chr18_31780756_f,Ammecr1l_NM_153515_utr3_7_0_chr18_31780756_f	12	+	3328	12	1	0.308606	0.000948
chr18	31783672	31783673	Ammecr1l_NM_001242430_utr3_7_0_chr18_31780756_f,Ammecr1l_NM_153515_utr3_7_0_chr18_31780756_f	15	+	3328	20	1	0.308606	0.000353
chr18	31783731	31783732	Ammecr1l_NM_001242430_utr3_7_0_chr18_31780756_f,Ammecr1l_NM_153515_utr3_7_0_chr18_31780756_f	12	+	3328	12	1	0.308606	0.00052
chr18	31783747	31783748	Ammecr1l_NM_001242430_utr3_7_0_chr18_31780756_f,Ammecr1l_NM_153515_utr3_7_0_chr18_31780756_f	15	+	3328	27	1	0.308606	0.000216
chr18	31783795	31783796	Ammecr1l_NM_001242430_utr3_7_0_chr18_31780756_f,Ammecr1l_NM_153515_utr3_7_0_chr18_31780756_f	8	+	3328	10	1	0.308606	0.00078
chr18	31783920	31783921	Ammecr1l_NM_001242430_utr3_7_0_chr18_31780756_f,Ammecr1l_NM_153515_utr3_7_0_chr18_31780756_f	4	+	3328	4	1	0.308606	0.00147
chrX	145446454	145446455	Amot_NM_153319_utr3_0_0_chrX_145446424_r	6	-	3577	6	1	0.00488987	0.000958
chrX	145449684	145449685	Amot_NM_153319_utr3_0_0_chrX_145446424_r	5	-	3577	9	1	0.00488987	0.000958
chr9	102733103	102733104	Amotl2_NM_019764_utr3_9_0_chr9_102731707_f	11	+	1711	11	1	0	0.00282
chr3	108074115	108074116	Ampd2_NM_001289719_utr3_0_0_chr3_108074062_r,Ampd2_NM_001289720_utr3_0_0_chr3_108074062_r,Ampd2_NM_001346665_utr3_0_0_chr3_108074059_r,Ampd2_NM_028779_utr3_0_0_chr3_108074062_r	7	-	856	7	1	0	0.00742
chr3	108074154	108074155	Ampd2_NM_001289719_utr3_0_0_chr3_108074062_r,Ampd2_NM_001289720_utr3_0_0_chr3_108074062_r,Ampd2_NM_001346665_utr3_0_0_chr3_108074059_r,Ampd2_NM_028779_utr3_0_0_chr3_108074062_r	14	-	856	21	1	0	0.0058
chr3	108074323	108074324	Ampd2_NM_001289719_utr3_0_0_chr3_108074062_r,Ampd2_NM_001289720_utr3_0_0_chr3_108074062_r,Ampd2_NM_001346665_utr3_0_0_chr3_108074059_r,Ampd2_NM_028779_utr3_0_0_chr3_108074062_r	15	-	856	18	1	0	0.00173
chr3	108074502	108074503	Ampd2_NM_001289719_utr3_0_0_chr3_108074062_r,Ampd2_NM_001289720_utr3_0_0_chr3_108074062_r,Ampd2_NM_001346665_utr3_0_0_chr3_108074059_r,Ampd2_NM_028779_utr3_0_0_chr3_108074062_r	10	-	856	10	1	0	0.00365
chr3	108074533	108074534	Ampd2_NM_001289719_utr3_0_0_chr3_108074062_r,Ampd2_NM_001289720_utr3_0_0_chr3_108074062_r,Ampd2_NM_001346665_utr3_0_0_chr3_108074059_r,Ampd2_NM_028779_utr3_0_0_chr3_108074062_r	7	-	856	7	1	0	0.00865
chr3	108074555	108074556	Ampd2_NM_001289719_utr3_0_0_chr3_108074062_r,Ampd2_NM_001289720_utr3_0_0_chr3_108074062_r,Ampd2_NM_001346665_utr3_0_0_chr3_108074059_r,Ampd2_NM_028779_utr3_0_0_chr3_108074062_r	9	-	856	9	1	0	0.00865
chr2	128612810	128612811	Anapc1_NM_008569_utr3_0_0_chr2_128610083_r	7	-	2865	7	1	0	0.00179
chr8	79775025	79775026	Anapc10_NM_001357237_utr3_5_0_chr8_79774932_f	9	+	2390	9	1	0	0.000819
chr11	120605618	120605619	Anapc11_NM_001038230_utr3_2_0_chr11_120605427_f,Anapc11_NM_025389_utr3_2_0_chr11_120605427_f	8	+	2772	8	1	0.0131746	0.00191
chr11	120605622	120605623	Anapc11_NM_001038230_utr3_2_0_chr11_120605427_f,Anapc11_NM_025389_utr3_2_0_chr11_120605427_f	7	+	2772	7	1	0.0131746	0.00268
chr12	86700841	86700842	Angel1_NM_144524_utr3_0_0_chr12_86700502_r	10	-	1779	10	1	0.00983197	0.00109
chr1	190946339	190946340	Angel2_NM_001199020_utr3_9_0_chr1_190945092_f,Angel2_NM_001357131_utr3_8_0_chr1_190945092_f,Angel2_NM_001357132_utr3_7_0_chr1_190945092_f,Angel2_NM_001357133_utr3_8_0_chr1_190945092_f,Angel2_NM_001357134_utr3_7_0_chr1_190945092_f,Angel2_NM_021421_utr3_8_0_chr1_190945092_f	9	+	1872	9	1	0.0260857	0.00105
chr1	190946463	190946464	Angel2_NM_001199020_utr3_9_0_chr1_190945092_f,Angel2_NM_001357131_utr3_8_0_chr1_190945092_f,Angel2_NM_001357132_utr3_7_0_chr1_190945092_f,Angel2_NM_001357133_utr3_8_0_chr1_190945092_f,Angel2_NM_001357134_utr3_7_0_chr1_190945092_f,Angel2_NM_021421_utr3_8_0_chr1_190945092_f	16	+	1872	16	1	0.0260857	0.000262
chr15	27593327	27593328	Ank_NM_020332_utr3_11_0_chr15_27593218_f	8	+	1690	8	1	0.480568	0.000193
chr11	72768864	72768865	Ankfy1_NM_009671_utr3_24_0_chr11_72767646_f	6	+	4501	6	1	0.0162275	0.00144
chr8	11611613	11611614	Ankrd10_NM_001281974_utr3_0_0_chr8_11611581_r,Ankrd10_NM_001281975_utr3_0_0_chr8_11611581_r,Ankrd10_NM_133971_utr3_0_0_chr8_11611581_r	18	-	903	18	1	0	0.00242
chr8	11611649	11611650	Ankrd10_NM_001281974_utr3_0_0_chr8_11611581_r,Ankrd10_NM_001281975_utr3_0_0_chr8_11611581_r,Ankrd10_NM_133971_utr3_0_0_chr8_11611581_r	11	-	903	11	1	0	0.00701
chr8	11611764	11611765	Ankrd10_NM_001281974_utr3_0_0_chr8_11611581_r,Ankrd10_NM_001281975_utr3_0_0_chr8_11611581_r,Ankrd10_NM_133971_utr3_0_0_chr8_11611581_r	10	-	903	10	1	0	0.00893
chr8	11611818	11611819	Ankrd10_NM_001281974_utr3_0_0_chr8_11611581_r,Ankrd10_NM_001281975_utr3_0_0_chr8_11611581_r,Ankrd10_NM_133971_utr3_0_0_chr8_11611581_r	9	-	903	9	1	0	0.00893
chr8	11611855	11611856	Ankrd10_NM_001281974_utr3_0_0_chr8_11611581_r,Ankrd10_NM_001281975_utr3_0_0_chr8_11611581_r,Ankrd10_NM_133971_utr3_0_0_chr8_11611581_r	17	-	903	17	1	0	0.00664
chr8	11611865	11611866	Ankrd10_NM_001281974_utr3_0_0_chr8_11611581_r,Ankrd10_NM_001281975_utr3_0_0_chr8_11611581_r,Ankrd10_NM_133971_utr3_0_0_chr8_11611581_r	12	-	903	12	1	0	0.00487
chr8	11612004	11612005	Ankrd10_NM_001281974_utr3_0_0_chr8_11611581_r,Ankrd10_NM_001281975_utr3_0_0_chr8_11611581_r,Ankrd10_NM_133971_utr3_0_0_chr8_11611581_r	17	-	903	17	1	0	0.00173
chr17	65969122	65969123	Ankrd12_NM_001025572_utr3_0_0_chr17_65967501_r	15	-	2651	15	1	0	0.000682
chr3	158006035	158006036	Ankrd13c_NM_001013806_utr3_12_0_chr3_158005871_f	4	+	967	4	1	0.0377662	0.00211
chr3	158006097	158006098	Ankrd13c_NM_001013806_utr3_12_0_chr3_158005871_f	6	+	967	6	1	0.0377662	0.00136
chr5	90228986	90228988	Ankrd17_NM_030886_utr3_0_0_chr5_90227166_r,Ankrd17_NM_198010_utr3_0_0_chr5_90227166_r	9	-	2116	18	2	0.00826611	0.00063
chr5	90229088	90229089	Ankrd17_NM_030886_utr3_0_0_chr5_90227166_r,Ankrd17_NM_198010_utr3_0_0_chr5_90227166_r	9	-	2116	12	1	0.00826611	0.000144
chr18	12253963	12253964	Ankrd29_NM_001190371_utr3_0_0_chr18_12252357_r	6	-	2237	6	1	0	0.000179
chr1	161170249	161170250	Ankrd45_NM_028664_utr3_6_0_chr1_161167712_f	8	+	2796	8	1	0	0.000626
chr15	36478605	36478606	Ankrd46_NM_175134_utr3_0_0_chr15_36477668_r	5	-	1589	5	1	0	0.00279
chr15	36478792	36478793	Ankrd46_NM_175134_utr3_0_0_chr15_36477668_r	6	-	1589	6	1	0	0.005
chr9	22332066	22332067	Anln_NM_028390_utr3_0_0_chr9_22331214_r	6	-	1836	6	1	0	0.00271
chr9	22332160	22332161	Anln_NM_028390_utr3_0_0_chr9_22331214_r	5	-	1836	5	1	0	0.00325
chr9	22332167	22332168	Anln_NM_028390_utr3_0_0_chr9_22331214_r	8	-	1836	8	1	0	0.00148
chr9	22332780	22332781	Anln_NM_028390_utr3_0_0_chr9_22331214_r	5	-	1836	5	1	0	0.00524
chr3	95945311	95945312	Anp32e_NM_001253757_utr3_6_0_chr3_95945251_f,Anp32e_NM_001253758_utr3_4_0_chr3_95945251_f,Anp32e_NM_023210_utr3_6_0_chr3_95945251_f	16	+	2137	18	1	0	0.00543
chr3	95945314	95945315	Anp32e_NM_001253757_utr3_6_0_chr3_95945251_f,Anp32e_NM_001253758_utr3_4_0_chr3_95945251_f,Anp32e_NM_023210_utr3_6_0_chr3_95945251_f	8	+	2137	8	1	0	0.00832
chr3	95945316	95945317	Anp32e_NM_001253757_utr3_6_0_chr3_95945251_f,Anp32e_NM_001253758_utr3_4_0_chr3_95945251_f,Anp32e_NM_023210_utr3_6_0_chr3_95945251_f	23	+	2137	23	1	0	0.00243
chr3	95945375	95945376	Anp32e_NM_001253757_utr3_6_0_chr3_95945251_f,Anp32e_NM_001253758_utr3_4_0_chr3_95945251_f,Anp32e_NM_023210_utr3_6_0_chr3_95945251_f	16	+	2137	16	1	0	0.00463
chr3	95945403	95945404	Anp32e_NM_001253757_utr3_6_0_chr3_95945251_f,Anp32e_NM_001253758_utr3_4_0_chr3_95945251_f,Anp32e_NM_023210_utr3_6_0_chr3_95945251_f	16	+	2137	16	1	0	0.00453
chr3	95945420	95945422	Anp32e_NM_001253757_utr3_6_0_chr3_95945251_f,Anp32e_NM_001253758_utr3_4_0_chr3_95945251_f,Anp32e_NM_023210_utr3_6_0_chr3_95945251_f	67	+	2137	67	2	0	0.000881
chr3	95945433	95945434	Anp32e_NM_001253757_utr3_6_0_chr3_95945251_f,Anp32e_NM_001253758_utr3_4_0_chr3_95945251_f,Anp32e_NM_023210_utr3_6_0_chr3_95945251_f	70	+	2137	70	1	0	0.000148
chr3	95945453	95945454	Anp32e_NM_001253757_utr3_6_0_chr3_95945251_f,Anp32e_NM_001253758_utr3_4_0_chr3_95945251_f,Anp32e_NM_023210_utr3_6_0_chr3_95945251_f	15	+	2137	15	1	0	0.00819
chr3	95945503	95945506	Anp32e_NM_001253757_utr3_6_0_chr3_95945251_f,Anp32e_NM_001253758_utr3_4_0_chr3_95945251_f,Anp32e_NM_023210_utr3_6_0_chr3_95945251_f	13	+	2137	32	3	0	0.00761
chr14	20456326	20456327	Anxa7_NM_001110794_utr3_0_0_chr14_20455261_r,Anxa7_NM_009674_utr3_0_0_chr14_20455261_r	4	-	1218	4	1	0.0219811	0.00148
chr3	127807077	127807078	Ap1ar_NM_001346718_utr3_0_0_chr3_127807007_r,Ap1ar_NM_145964_utr3_0_0_chr3_127807007_r	13	-	1484	13	1	0.0180411	0.000639
chr3	127807091	127807093	Ap1ar_NM_001346718_utr3_0_0_chr3_127807007_r,Ap1ar_NM_145964_utr3_0_0_chr3_127807007_r	10	-	1484	15	2	0.0180411	0.00057
chr3	127807145	127807146	Ap1ar_NM_001346718_utr3_0_0_chr3_127807007_r,Ap1ar_NM_145964_utr3_0_0_chr3_127807007_r	7	-	1484	7	1	0.0180411	0.0018
chr8	109860801	109860802	Ap1g1_NM_001301211_utr3_22_0_chr8_109860196_f,Ap1g1_NM_009677_utr3_23_0_chr8_109860196_f	13	+	4014	13	1	0.107593	0.000673
chr8	109860955	109860956	Ap1g1_NM_001301211_utr3_22_0_chr8_109860196_f,Ap1g1_NM_009677_utr3_23_0_chr8_109860196_f	7	+	4014	7	1	0.107593	0.000422
chr8	109860989	109860990	Ap1g1_NM_001301211_utr3_22_0_chr8_109860196_f,Ap1g1_NM_009677_utr3_23_0_chr8_109860196_f	8	+	4014	8	1	0.107593	0.00079
chr7	44900561	44900562	Ap2a1_NM_001077264_utr3_0_0_chr7_44900373_r,Ap2a1_NM_007458_utr3_0_0_chr7_44900373_r	5	-	365	9	1	0.169192	0.000813
chr7	79879802	79879803	Ap3s2_NM_009682_utr3_0_0_chr7_79875325_r	7	-	5159	7	1	0.00518956	0.000329
chr7	64753339	64753340	Apba2_NM_001291166_utr3_14_0_chr7_64753143_f,Apba2_NM_001291167_utr3_13_0_chr7_64753143_f,Apba2_NM_007461_utr3_14_0_chr7_64753143_f	11	+	734	11	1	0	0.00897
chr7	64753346	64753347	Apba2_NM_001291166_utr3_14_0_chr7_64753143_f,Apba2_NM_001291167_utr3_13_0_chr7_64753143_f,Apba2_NM_007461_utr3_14_0_chr7_64753143_f	9	+	734	15	1	0	0.00849
chr7	64753350	64753353	Apba2_NM_001291166_utr3_14_0_chr7_64753143_f,Apba2_NM_001291167_utr3_13_0_chr7_64753143_f,Apba2_NM_007461_utr3_14_0_chr7_64753143_f	11	+	734	24	3	0	0.00186
chr7	64753357	64753358	Apba2_NM_001291166_utr3_14_0_chr7_64753143_f,Apba2_NM_001291167_utr3_13_0_chr7_64753143_f,Apba2_NM_007461_utr3_14_0_chr7_64753143_f	19	+	734	26	1	0	0.00139
chr2	22875457	22875458	Apbb1ip_NM_019456_utr3_13_0_chr2_22875322_f	5	+	332	5	1	0	0.00173
chr18	34318725	34318726	Apc_NM_007462_utr3_15_0_chr18_34318582_f	5	+	3609	5	1	0.0250041	0.00199
chr18	34319327	34319330	Apc_NM_007462_utr3_15_0_chr18_34318582_f	14	+	3609	30	3	0.0250041	0.000356
chr14	50927030	50927031	Apex1_NM_009687_utr3_4_0_chr14_50926974_f	10	+	215	15	1	0.759441	0.000455
chr2	94412367	94412369	Api5_NM_001305258_utr3_0_0_chr2_94411727_r,Api5_NM_001349003_utr3_0_0_chr2_94411727_r,Api5_NM_007466_utr3_0_0_chr2_94411727_r	21	-	2060	29	2	0.378927	1.44e-07
chr2	94412375	94412379	Api5_NM_001305258_utr3_0_0_chr2_94411727_r,Api5_NM_001349003_utr3_0_0_chr2_94411727_r,Api5_NM_007466_utr3_0_0_chr2_94411727_r	25	-	2060	88	4	0.378927	1.82e-06
chr2	94412380	94412382	Api5_NM_001305258_utr3_0_0_chr2_94411727_r,Api5_NM_001349003_utr3_0_0_chr2_94411727_r,Api5_NM_007466_utr3_0_0_chr2_94411727_r	25	-	2060	88	2	0.378927	0.000243
chr2	94412387	94412389	Api5_NM_001305258_utr3_0_0_chr2_94411727_r,Api5_NM_001349003_utr3_0_0_chr2_94411727_r,Api5_NM_007466_utr3_0_0_chr2_94411727_r	6	-	2060	10	2	0.378927	0.000436
chr2	94412392	94412393	Api5_NM_001305258_utr3_0_0_chr2_94411727_r,Api5_NM_001349003_utr3_0_0_chr2_94411727_r,Api5_NM_007466_utr3_0_0_chr2_94411727_r	9	-	2060	9	1	0.378927	0.000651
chr2	94412403	94412404	Api5_NM_001305258_utr3_0_0_chr2_94411727_r,Api5_NM_001349003_utr3_0_0_chr2_94411727_r,Api5_NM_007466_utr3_0_0_chr2_94411727_r	4	-	2060	4	1	0.378927	0.00106
chr2	94412444	94412445	Api5_NM_001305258_utr3_0_0_chr2_94411727_r,Api5_NM_001349003_utr3_0_0_chr2_94411727_r,Api5_NM_007466_utr3_0_0_chr2_94411727_r	22	-	2060	22	1	0.378927	0.000834
chr2	94412450	94412451	Api5_NM_001305258_utr3_0_0_chr2_94411727_r,Api5_NM_001349003_utr3_0_0_chr2_94411727_r,Api5_NM_007466_utr3_0_0_chr2_94411727_r	10	-	2060	11	1	0.378927	0.000243
chr2	94412464	94412465	Api5_NM_001305258_utr3_0_0_chr2_94411727_r,Api5_NM_001349003_utr3_0_0_chr2_94411727_r,Api5_NM_007466_utr3_0_0_chr2_94411727_r	11	-	2060	16	1	0.378927	0.000436
chr2	94412471	94412473	Api5_NM_001305258_utr3_0_0_chr2_94411727_r,Api5_NM_001349003_utr3_0_0_chr2_94411727_r,Api5_NM_007466_utr3_0_0_chr2_94411727_r	16	-	2060	26	2	0.378927	3.13e-05
chr2	94412477	94412478	Api5_NM_001305258_utr3_0_0_chr2_94411727_r,Api5_NM_001349003_utr3_0_0_chr2_94411727_r,Api5_NM_007466_utr3_0_0_chr2_94411727_r	10	-	2060	15	1	0.378927	7.47e-05
chr9	31149781	31149782	Aplp2_NM_001102455_utr3_0_0_chr9_31149557_r,Aplp2_NM_001102456_utr3_0_0_chr9_31149557_r,Aplp2_NM_009691_utr3_0_0_chr9_31149557_r	21	-	1314	92	1	0	0.00992
chr9	31149786	31149787	Aplp2_NM_001102455_utr3_0_0_chr9_31149557_r,Aplp2_NM_001102456_utr3_0_0_chr9_31149557_r,Aplp2_NM_009691_utr3_0_0_chr9_31149557_r	21	-	1314	92	1	0	0.000657
chr9	31149820	31149821	Aplp2_NM_001102455_utr3_0_0_chr9_31149557_r,Aplp2_NM_001102456_utr3_0_0_chr9_31149557_r,Aplp2_NM_009691_utr3_0_0_chr9_31149557_r	25	-	1314	25	1	0	0.00388
chr9	31149855	31149856	Aplp2_NM_001102455_utr3_0_0_chr9_31149557_r,Aplp2_NM_001102456_utr3_0_0_chr9_31149557_r,Aplp2_NM_009691_utr3_0_0_chr9_31149557_r	22	-	1314	22	1	0	0.00829
chr9	31150471	31150472	Aplp2_NM_001102455_utr3_0_0_chr9_31149557_r,Aplp2_NM_001102456_utr3_0_0_chr9_31149557_r,Aplp2_NM_009691_utr3_0_0_chr9_31149557_r	14	-	1314	14	1	0	0.00337
chr9	31150483	31150484	Aplp2_NM_001102455_utr3_0_0_chr9_31149557_r,Aplp2_NM_001102456_utr3_0_0_chr9_31149557_r,Aplp2_NM_009691_utr3_0_0_chr9_31149557_r	26	-	1314	26	1	0	0.00494
chr9	31150677	31150678	Aplp2_NM_001102455_utr3_0_0_chr9_31149557_r,Aplp2_NM_001102456_utr3_0_0_chr9_31149557_r,Aplp2_NM_009691_utr3_0_0_chr9_31149557_r	10	-	1314	10	1	0	0.00829
chr11	85191373	85191374	Appbp2_NM_025825_utr3_0_0_chr11_85191310_r	10	-	336	17	1	0	0.00541
chr11	85191377	85191378	Appbp2_NM_025825_utr3_0_0_chr11_85191310_r	17	-	336	17	1	0	0.00181
chr14	26922875	26922876	Appl1_NM_145221_utr3_0_0_chr14_26918988_r	6	-	4740	11	1	0	0.000564
chr2	114101248	114101249	Aqr_NM_009702_utr3_0_0_chr2_114101161_r	13	-	278	13	1	0	0.00264
chr2	114101256	114101257	Aqr_NM_009702_utr3_0_0_chr2_114101161_r	11	-	278	11	1	0	0.00251
chrX	20852715	20852716	Araf_NM_001159645_utr3_5_0_chrX_20852033_f	6	+	873	6	1	0	0.00135
chr9	44742247	44742249	Arcn1_NM_145985_utr3_0_0_chr9_44742144_r	9	-	1783	13	2	0	0.000135
chr11	59211476	59211478	Arf1_NM_001130408_utr3_0_0_chr11_59211412_r,Arf1_NM_007476_utr3_0_0_chr11_59211412_r	6	-	1122	10	2	0.0944912	0.000178
chr11	59211488	59211490	Arf1_NM_001130408_utr3_0_0_chr11_59211412_r,Arf1_NM_007476_utr3_0_0_chr11_59211412_r	15	-	1122	19	2	0.0944912	0.000888
chr11	59212168	59212169	Arf1_NM_001130408_utr3_0_0_chr11_59211412_r,Arf1_NM_007476_utr3_0_0_chr11_59211412_r	9	-	1122	18	1	0.0944912	8.85e-05
chr15	98737712	98737713	Arf3_NM_001355510_utr3_0_0_chr15_98737624_r,Arf3_NM_007478_utr3_0_0_chr15_98737626_r	10	-	2709	23	1	0.0555165	0.000538
chr15	98737714	98737715	Arf3_NM_001355510_utr3_0_0_chr15_98737624_r,Arf3_NM_007478_utr3_0_0_chr15_98737626_r	10	-	2709	23	1	0.0555165	0.000538
chr15	98737719	98737720	Arf3_NM_001355510_utr3_0_0_chr15_98737624_r,Arf3_NM_007478_utr3_0_0_chr15_98737626_r	10	-	2709	16	1	0.0555165	0.000537
chr15	98737752	98737753	Arf3_NM_001355510_utr3_0_0_chr15_98737624_r,Arf3_NM_007478_utr3_0_0_chr15_98737626_r	8	-	2709	18	1	0.0555165	0.000931
chr15	98737783	98737784	Arf3_NM_001355510_utr3_0_0_chr15_98737624_r,Arf3_NM_007478_utr3_0_0_chr15_98737626_r	12	-	2709	19	1	0.0555165	0.000333
chr15	98737785	98737786	Arf3_NM_001355510_utr3_0_0_chr15_98737624_r,Arf3_NM_007478_utr3_0_0_chr15_98737626_r	7	-	2709	7	1	0.0555165	0.000909
chr15	98737902	98737903	Arf3_NM_001355510_utr3_0_0_chr15_98737624_r,Arf3_NM_007478_utr3_0_0_chr15_98737626_r	5	-	2709	5	1	0.0555165	0.00142
chr15	98738215	98738216	Arf3_NM_001355510_utr3_0_0_chr15_98737624_r,Arf3_NM_007478_utr3_0_0_chr15_98737626_r	14	-	2709	14	1	0.0555165	9.53e-05
chr15	98738232	98738233	Arf3_NM_001355510_utr3_0_0_chr15_98737624_r,Arf3_NM_007478_utr3_0_0_chr15_98737626_r	13	-	2709	19	1	0.0555165	0.000203
chr15	98738239	98738240	Arf3_NM_001355510_utr3_0_0_chr15_98737624_r,Arf3_NM_007478_utr3_0_0_chr15_98737626_r	8	-	2709	14	1	0.0555165	0.000909
chr15	98738247	98738248	Arf3_NM_001355510_utr3_0_0_chr15_98737624_r,Arf3_NM_007478_utr3_0_0_chr15_98737626_r	4	-	2709	4	1	0.0555165	0.00162
chr15	98738295	98738296	Arf3_NM_001355510_utr3_0_0_chr15_98737624_r,Arf3_NM_007478_utr3_0_0_chr15_98737626_r	6	-	2709	10	1	0.0555165	0.00162
chr15	98739224	98739225	Arf3_NM_001355510_utr3_0_0_chr15_98737624_r,Arf3_NM_007478_utr3_0_0_chr15_98737626_r	7	-	2709	7	1	0.0555165	0.000862
chr14	26656010	26656013	Arf4_NM_007479_utr3_5_0_chr14_26655983_f	12	+	1276	27	3	0.0421003	4.66e-05
chr14	26656036	26656037	Arf4_NM_007479_utr3_5_0_chr14_26655983_f	71	+	1276	78	1	0.0421003	1.7e-06
chr14	26656086	26656087	Arf4_NM_007479_utr3_5_0_chr14_26655983_f	14	+	1276	14	1	0.0421003	0.00108
chr14	26656099	26656100	Arf4_NM_007479_utr3_5_0_chr14_26655983_f	11	+	1276	11	1	0.0421003	0.00161
chr14	26656107	26656108	Arf4_NM_007479_utr3_5_0_chr14_26655983_f	8	+	1276	13	1	0.0421003	0.00032
chr14	26656128	26656129	Arf4_NM_007479_utr3_5_0_chr14_26655983_f	6	+	1276	11	1	0.0421003	0.00207
chr14	26656135	26656138	Arf4_NM_007479_utr3_5_0_chr14_26655983_f	8	+	1276	18	3	0.0421003	0.00135
chr14	26656175	26656176	Arf4_NM_007479_utr3_5_0_chr14_26655983_f	6	+	1276	6	1	0.0421003	0.00161
chr14	26656285	26656286	Arf4_NM_007479_utr3_5_0_chr14_26655983_f	9	+	1276	9	1	0.0421003	0.000622
chr14	26656307	26656309	Arf4_NM_007479_utr3_5_0_chr14_26655983_f	11	+	1276	24	2	0.0421003	4.77e-05
chr14	26656315	26656317	Arf4_NM_007479_utr3_5_0_chr14_26655983_f	8	+	1276	14	2	0.0421003	0.000158
chr14	26656332	26656333	Arf4_NM_007479_utr3_5_0_chr14_26655983_f	10	+	1276	14	1	0.0421003	0.000303
chr14	26656343	26656345	Arf4_NM_007479_utr3_5_0_chr14_26655983_f	15	+	1276	47	2	0.0421003	0.000709
chr14	26656349	26656350	Arf4_NM_007479_utr3_5_0_chr14_26655983_f	16	+	1276	16	1	0.0421003	0.000432
chr14	26656370	26656371	Arf4_NM_007479_utr3_5_0_chr14_26655983_f	8	+	1276	12	1	0.0421003	0.00161
chr14	26656424	26656425	Arf4_NM_007479_utr3_5_0_chr14_26655983_f	8	+	1276	8	1	0.0421003	0.000874
chr14	26656517	26656518	Arf4_NM_007479_utr3_5_0_chr14_26655983_f	5	+	1276	5	1	0.0421003	0.00135
chr14	26656612	26656613	Arf4_NM_007479_utr3_5_0_chr14_26655983_f	5	+	1276	9	1	0.0421003	0.000709
chr14	26656638	26656639	Arf4_NM_007479_utr3_5_0_chr14_26655983_f	8	+	1276	8	1	0.0421003	0.000709
chr14	26656653	26656654	Arf4_NM_007479_utr3_5_0_chr14_26655983_f	11	+	1276	21	1	0.0421003	0.000153
chr14	26656655	26656656	Arf4_NM_007479_utr3_5_0_chr14_26655983_f	11	+	1276	21	1	0.0421003	0.000303
chr14	26656671	26656672	Arf4_NM_007479_utr3_5_0_chr14_26655983_f	22	+	1276	27	1	0.0421003	4.69e-06
chr14	26656689	26656691	Arf4_NM_007479_utr3_5_0_chr14_26655983_f	10	+	1276	13	2	0.0421003	0.000231
chr14	26656709	26656710	Arf4_NM_007479_utr3_5_0_chr14_26655983_f	6	+	1276	6	1	0.0421003	0.00207
chr14	26656728	26656730	Arf4_NM_007479_utr3_5_0_chr14_26655983_f	24	+	1276	32	2	0.0421003	7.6e-07
chr14	26656759	26656760	Arf4_NM_007479_utr3_5_0_chr14_26655983_f	7	+	1276	7	1	0.0421003	0.000709
chr14	26656790	26656792	Arf4_NM_007479_utr3_5_0_chr14_26655983_f	8	+	1276	19	2	0.0421003	0.000223
chr14	26656795	26656796	Arf4_NM_007479_utr3_5_0_chr14_26655983_f	11	+	1276	11	1	0.0421003	0.00207
chr14	26656806	26656807	Arf4_NM_007479_utr3_5_0_chr14_26655983_f	36	+	1276	48	1	0.0421003	0.000117
chr14	26656814	26656815	Arf4_NM_007479_utr3_5_0_chr14_26655983_f	5	+	1276	5	1	0.0421003	0.00135
chr12	69373439	69373440	Arf6_NM_007481_utr3_1_0_chr12_69373322_f	8	+	2659	10	1	0	0.00705
chr12	69373453	69373454	Arf6_NM_007481_utr3_1_0_chr12_69373322_f	8	+	2659	8	1	0	0.00603
chr12	69373680	69373681	Arf6_NM_007481_utr3_1_0_chr12_69373322_f	10	+	2659	10	1	0	0.00833
chr12	69373691	69373692	Arf6_NM_007481_utr3_1_0_chr12_69373322_f	24	+	2659	24	1	0	0.00685
chr12	69373718	69373720	Arf6_NM_007481_utr3_1_0_chr12_69373322_f	16	+	2659	39	2	0	0.00692
chr12	69373724	69373726	Arf6_NM_007481_utr3_1_0_chr12_69373322_f	98	+	2659	117	2	0	4.9e-05
chr12	69373740	69373742	Arf6_NM_007481_utr3_1_0_chr12_69373322_f	47	+	2659	66	2	0	0.00172
chr12	69373752	69373753	Arf6_NM_007481_utr3_1_0_chr12_69373322_f	23	+	2659	23	1	0	0.00476
chr15	83299922	83299923	Arfgap3_NM_025445_utr3_0_0_chr15_83299740_r	5	-	945	5	1	0	0.00206
chr1	10137620	10137621	Arfgef1_NM_001102430_utr3_0_0_chr1_10137507_r	7	-	1325	12	1	0.0800145	0.00165
chr3	84496334	84496335	Arfip1_NM_001081093_utr3_0_0_chr3_84496093_r,Arfip1_NM_001293801_utr3_0_0_chr3_84496093_r	8	-	1643	9	1	0	0.000118
chr8	8667106	8667107	Arglu1_NM_176849_utr3_0_0_chr8_8666576_r	5	-	676	5	1	0	0.0014
chr2	91671093	91671094	Arhgap1_NM_001145902_utr3_12_0_chr2_91670901_f,Arhgap1_NM_146124_utr3_12_0_chr2_91670901_f	7	+	1420	7	1	0.0635492	0.00107
chr7	123279315	123279316	Arhgap17_NM_001122640_utr3_0_0_chr7_123279149_r,Arhgap17_NM_001122641_utr3_0_0_chr7_123279149_r,Arhgap17_NM_001122642_utr3_0_0_chr7_123279149_r,Arhgap17_NM_001122643_utr3_0_0_chr7_123279149_r,Arhgap17_NM_001316713_utr3_0_0_chr7_123279149_r,Arhgap17_NM_144529_utr3_0_0_chr7_123279149_r	8	-	968	8	1	0	0.000643
chr3	122015374	122015375	Arhgap29_NM_001356524_utr3_22_0_chr3_122014976_f,Arhgap29_NM_172525_utr3_22_0_chr3_122014976_f	20	+	1702	20	1	0	0.0037
chr3	122015632	122015633	Arhgap29_NM_001356524_utr3_22_0_chr3_122014976_f,Arhgap29_NM_172525_utr3_22_0_chr3_122014976_f	17	+	1702	17	1	0	0.00721
chr3	122015636	122015638	Arhgap29_NM_001356524_utr3_22_0_chr3_122014976_f,Arhgap29_NM_172525_utr3_22_0_chr3_122014976_f	15	+	1702	34	2	0	0.00975
chr3	122015643	122015644	Arhgap29_NM_001356524_utr3_22_0_chr3_122014976_f,Arhgap29_NM_172525_utr3_22_0_chr3_122014976_f	29	+	1702	36	1	0	0.000698
chr3	122015794	122015795	Arhgap29_NM_001356524_utr3_22_0_chr3_122014976_f,Arhgap29_NM_172525_utr3_22_0_chr3_122014976_f	13	+	1702	13	1	0	0.00409
chr3	122015900	122015901	Arhgap29_NM_001356524_utr3_22_0_chr3_122014976_f,Arhgap29_NM_172525_utr3_22_0_chr3_122014976_f	11	+	1702	11	1	0	0.00495
chr3	122016090	122016091	Arhgap29_NM_001356524_utr3_22_0_chr3_122014976_f,Arhgap29_NM_172525_utr3_22_0_chr3_122014976_f	10	+	1702	10	1	0	0.00584
chr3	122016116	122016117	Arhgap29_NM_001356524_utr3_22_0_chr3_122014976_f,Arhgap29_NM_172525_utr3_22_0_chr3_122014976_f	15	+	1702	15	1	0	0.00841
chr9	32261820	32261822	Arhgap32_NM_001195632_utr3_21_0_chr9_32261149_f,Arhgap32_NM_177379_utr3_12_0_chr9_32261149_f	8	+	4363	12	2	0.00837037	0.00197
chr9	32262147	32262148	Arhgap32_NM_001195632_utr3_21_0_chr9_32261149_f,Arhgap32_NM_177379_utr3_12_0_chr9_32261149_f	7	+	4363	7	1	0.00837037	0.00197
chr9	32262740	32262742	Arhgap32_NM_001195632_utr3_21_0_chr9_32261149_f,Arhgap32_NM_177379_utr3_12_0_chr9_32261149_f	6	+	4363	9	2	0.00837037	0.00144
chr9	32264309	32264310	Arhgap32_NM_001195632_utr3_21_0_chr9_32261149_f,Arhgap32_NM_177379_utr3_12_0_chr9_32261149_f	15	+	4363	19	1	0.00837037	0.00216
chr9	32264314	32264315	Arhgap32_NM_001195632_utr3_21_0_chr9_32261149_f,Arhgap32_NM_177379_utr3_12_0_chr9_32261149_f	13	+	4363	13	1	0.00837037	0.00138
chr9	32264323	32264324	Arhgap32_NM_001195632_utr3_21_0_chr9_32261149_f,Arhgap32_NM_177379_utr3_12_0_chr9_32261149_f	6	+	4363	6	1	0.00837037	0.00149
chr9	32264458	32264459	Arhgap32_NM_001195632_utr3_21_0_chr9_32261149_f,Arhgap32_NM_177379_utr3_12_0_chr9_32261149_f	6	+	4363	6	1	0.00837037	0.00144
chr9	32264495	32264496	Arhgap32_NM_001195632_utr3_21_0_chr9_32261149_f,Arhgap32_NM_177379_utr3_12_0_chr9_32261149_f	16	+	4363	22	1	0.00837037	0.00034
chr9	32264530	32264532	Arhgap32_NM_001195632_utr3_21_0_chr9_32261149_f,Arhgap32_NM_177379_utr3_12_0_chr9_32261149_f	22	+	4363	26	2	0.00837037	0.000938
chr9	32264565	32264566	Arhgap32_NM_001195632_utr3_21_0_chr9_32261149_f,Arhgap32_NM_177379_utr3_12_0_chr9_32261149_f	8	+	4363	12	1	0.00837037	0.00105
chr9	32264703	32264704	Arhgap32_NM_001195632_utr3_21_0_chr9_32261149_f,Arhgap32_NM_177379_utr3_12_0_chr9_32261149_f	11	+	4363	17	1	0.00837037	0.000615
chr11	65002069	65002070	Arhgap44_NM_001099288_utr3_0_0_chr11_65002039_r,Arhgap44_NM_175003_utr3_0_0_chr11_65002039_r	12	-	1412	12	1	0.1594	0.000138
chr11	65002362	65002363	Arhgap44_NM_001099288_utr3_0_0_chr11_65002039_r,Arhgap44_NM_175003_utr3_0_0_chr11_65002039_r	6	-	1412	6	1	0.1594	0.000557
chr12	52567824	52567825	Arhgap5_NM_009706_utr3_5_0_chr12_52567339_f	9	+	513	9	1	0	0.00174
chr7	24926541	24926542	Arhgef1_NM_001130150_utr3_30_0_chr7_24926251_f,Arhgef1_NM_001130151_utr3_29_0_chr7_24926251_f,Arhgef1_NM_001130152_utr3_28_0_chr7_24926251_f,Arhgef1_NM_001130153_utr3_28_0_chr7_24926251_f,Arhgef1_NM_008488_utr3_28_0_chr7_24926251_f	7	+	341	7	1	0	0.00125
chr3	87737964	87737965	Arhgef11_NM_001003912_utr3_39_0_chr3_87737103_f	8	+	931	8	1	0	0.00234
chr8	3456091	3456092	Arhgef18_NM_133962_utr3_19_0_chr8_3454536_f	8	+	2065	8	1	0.12277	0.000628
chr8	3456135	3456136	Arhgef18_NM_133962_utr3_19_0_chr8_3454536_f	8	+	2065	8	1	0.12277	0.000469
chr8	3456139	3456141	Arhgef18_NM_133962_utr3_19_0_chr8_3454536_f	11	+	2065	19	2	0.12277	9.22e-06
chr8	3456145	3456146	Arhgef18_NM_133962_utr3_19_0_chr8_3454536_f	14	+	2065	44	1	0.12277	6.84e-05
chr8	3456147	3456148	Arhgef18_NM_133962_utr3_19_0_chr8_3454536_f	14	+	2065	44	1	0.12277	0.000194
chr8	3456188	3456189	Arhgef18_NM_133962_utr3_19_0_chr8_3454536_f	8	+	2065	8	1	0.12277	0.000342
chr3	88647512	88647513	Arhgef2_NM_001198911_utr3_22_0_chr3_88646864_f,Arhgef2_NM_001198912_utr3_21_0_chr3_88646864_f,Arhgef2_NM_001198913_utr3_21_0_chr3_88646864_f,Arhgef2_NM_008487_utr3_21_0_chr3_88646864_f	6	+	1189	10	1	0.0758957	0.00155
chr14	27402029	27402030	Arhgef3_NM_001289686_utr3_12_0_chr14_27401980_f,Arhgef3_NM_001289687_utr3_9_0_chr14_27401980_f,Arhgef3_NM_001289688_utr3_9_0_chr14_27401980_f,Arhgef3_NM_027871_utr3_10_0_chr14_27401980_f	4	+	1932	4	1	1.27221	0.000692
chr8	11834388	11834389	Arhgef7_NM_001113518_utr3_20_0_chr8_11833093_f,Arhgef7_NM_017402_utr3_19_0_chr8_11833093_f	8	+	2125	8	1	0	0.00034
chr4	133679205	133679206	Arid1a_NM_001080819_utr3_0_0_chr4_133679008_r	17	-	1323	17	1	0	0.00765
chr4	133679260	133679261	Arid1a_NM_001080819_utr3_0_0_chr4_133679008_r	7	-	1323	7	1	0	0.00765
chr4	133679415	133679416	Arid1a_NM_001080819_utr3_0_0_chr4_133679008_r	17	-	1323	17	1	0	0.00537
chr4	133679660	133679661	Arid1a_NM_001080819_utr3_0_0_chr4_133679008_r	8	-	1323	8	1	0	0.00829
chr4	133679665	133679667	Arid1a_NM_001080819_utr3_0_0_chr4_133679008_r	13	-	1323	19	2	0	0.00121
chr4	133679980	133679981	Arid1a_NM_001080819_utr3_0_0_chr4_133679008_r	13	-	1323	13	1	0	0.00696
chr13	14198982	14198983	Arid4b_NM_194262_utr3_23_0_chr13_14197734_f,Arid4b_NM_198122_utr3_22_0_chr13_14197734_f	4	+	1870	4	1	0	0.00268
chr13	14199068	14199069	Arid4b_NM_194262_utr3_23_0_chr13_14197734_f,Arid4b_NM_198122_utr3_22_0_chr13_14197734_f	7	+	1870	8	1	0	0.000425
chr9	59392137	59392139	Arih1_NM_019927_utr3_0_0_chr9_59388554_r	14	-	4740	19	2	0.276462	0.000408
chr9	59392626	59392627	Arih1_NM_019927_utr3_0_0_chr9_59388554_r	6	-	4740	6	1	0.276462	0.000408
chr9	59393149	59393150	Arih1_NM_019927_utr3_0_0_chr9_59388554_r	14	-	4740	14	1	0.276462	0.000165
chr9	59393161	59393162	Arih1_NM_019927_utr3_0_0_chr9_59388554_r	6	-	4740	6	1	0.276462	0.000467
chr9	108604763	108604764	Arih2_NM_001357283_utr3_0_0_chr9_108602943_r,Arih2_NM_001357285_utr3_0_0_chr9_108602943_r,Arih2_NM_001357286_utr3_0_0_chr9_108602943_r,Arih2_NM_011790_utr3_0_0_chr9_108602943_r	4	-	2139	4	1	0.00817722	0.00162
chr9	108604900	108604901	Arih2_NM_001357283_utr3_0_0_chr9_108602943_r,Arih2_NM_001357285_utr3_0_0_chr9_108602943_r,Arih2_NM_001357286_utr3_0_0_chr9_108602943_r,Arih2_NM_011790_utr3_0_0_chr9_108602943_r	6	-	2139	6	1	0.00817722	0.00162
chr18	46933264	46933265	Arl14epl_NM_001033446_utr3_4_0_chr18_46932629_f	8	+	1594	8	1	0	0.0082
chr18	46933379	46933380	Arl14epl_NM_001033446_utr3_4_0_chr18_46932629_f	79	+	1594	79	1	0	0.000156
chr18	46933978	46933979	Arl14epl_NM_001033446_utr3_4_0_chr18_46932629_f	20	+	1594	20	1	0	0.00391
chr8	94673490	94673491	Arl2bp_NM_024191_utr3_5_0_chr8_94673119_f,Arl2bp_NM_024269_utr3_5_0_chr8_94673119_f	6	+	1339	6	1	0	0.00468
chr8	94674402	94674403	Arl2bp_NM_024191_utr3_5_0_chr8_94673119_f,Arl2bp_NM_024269_utr3_5_0_chr8_94673119_f	12	+	1339	12	1	0	0.00468
chr2	52401930	52401931	Arl5a_NM_182994_utr3_0_0_chr2_52397951_r	7	-	4433	7	1	0	0.000667
chr2	15077919	15077920	Arl5b_NM_029466_utr3_5_0_chr2_15076305_f	9	+	2887	9	1	0	0.000372
chr7	118118938	118118939	Arl6ip1_NM_019419_utr3_0_0_chr7_118118890_r	16	-	1402	16	1	0	0.006
chr7	118118974	118118975	Arl6ip1_NM_019419_utr3_0_0_chr7_118118890_r	14	-	1402	14	1	0	0.00802
chr7	118119072	118119073	Arl6ip1_NM_019419_utr3_0_0_chr7_118118890_r	14	-	1402	14	1	0	0.00858
chr7	118119581	118119582	Arl6ip1_NM_019419_utr3_0_0_chr7_118118890_r	63	-	1402	75	1	0	2.05e-05
chr7	118119627	118119628	Arl6ip1_NM_019419_utr3_0_0_chr7_118118890_r	24	-	1402	24	1	0	0.00858
chr7	118120211	118120212	Arl6ip1_NM_019419_utr3_0_0_chr7_118118890_r	22	-	1402	22	1	0	0.00264
chr2	53217585	53217586	Arl6ip6_NM_022989_utr3_3_0_chr2_53217389_f	8	+	1833	8	1	0.0199236	0.00151
chr2	53218030	53218031	Arl6ip6_NM_022989_utr3_3_0_chr2_53217389_f	7	+	1833	7	1	0.0199236	0.00106
chr2	53218101	53218102	Arl6ip6_NM_022989_utr3_3_0_chr2_53217389_f	14	+	1833	14	1	0.0199236	0.00283
chr2	53218168	53218169	Arl6ip6_NM_022989_utr3_3_0_chr2_53217389_f	6	+	1833	6	1	0.0199236	0.002
chr2	53218322	53218324	Arl6ip6_NM_022989_utr3_3_0_chr2_53217389_f	22	+	1833	22	2	0.0199236	0.000325
chr2	53218329	53218330	Arl6ip6_NM_022989_utr3_3_0_chr2_53217389_f	5	+	1833	5	1	0.0199236	0.002
chr2	53218413	53218414	Arl6ip6_NM_022989_utr3_3_0_chr2_53217389_f	4	+	1833	4	1	0.0199236	0.00283
chr1	135156113	135156114	Arl8a_NM_026823_utr3_6_0_chr1_135155272_f	8	+	997	12	1	0.0538817	0.000435
chr1	135156117	135156118	Arl8a_NM_026823_utr3_6_0_chr1_135155272_f	8	+	997	8	1	0.0538817	0.00124
chr1	135156123	135156124	Arl8a_NM_026823_utr3_6_0_chr1_135155272_f	5	+	997	5	1	0.0538817	0.001
chr1	135156144	135156145	Arl8a_NM_026823_utr3_6_0_chr1_135155272_f	8	+	997	8	1	0.0538817	0.000352
chr1	135156156	135156157	Arl8a_NM_026823_utr3_6_0_chr1_135155272_f	8	+	997	11	1	0.0538817	0.000194
chr1	135156164	135156165	Arl8a_NM_026823_utr3_6_0_chr1_135155272_f	8	+	997	19	1	0.0538817	0.00024
chr1	135156187	135156189	Arl8a_NM_026823_utr3_6_0_chr1_135155272_f	24	+	997	29	2	0.0538817	1.13e-05
chr9	99520008	99520009	Armc8_NM_001166138_utr3_0_0_chr9_99518245_r	6	-	2176	6	1	0	0.000303
chr9	99520137	99520138	Armc8_NM_001166138_utr3_0_0_chr9_99518245_r	5	-	2176	5	1	0	0.000994
chrX	134804310	134804311	Armcx2_NM_001166397_utr3_0_0_chrX_134804142_r,Armcx2_NM_001166398_utr3_0_0_chrX_134804142_r,Armcx2_NM_026139_utr3_0_0_chrX_134804142_r	5	-	386	5	1	0	0.00499
chr7	113313879	113313880	Arntl_NM_001243048_utr3_16_0_chr7_113313620_f,Arntl_NM_001357070_utr3_19_0_chr7_113313620_f,Arntl_NM_007489_utr3_19_0_chr7_113313620_f	10	+	507	10	1	0.500039	0.00101
chr7	113313894	113313895	Arntl_NM_001243048_utr3_16_0_chr7_113313620_f,Arntl_NM_001357070_utr3_19_0_chr7_113313620_f,Arntl_NM_007489_utr3_19_0_chr7_113313620_f	7	+	507	12	1	0.500039	0.000278
chr7	113314026	113314027	Arntl_NM_001243048_utr3_16_0_chr7_113313620_f,Arntl_NM_001357070_utr3_19_0_chr7_113313620_f,Arntl_NM_007489_utr3_19_0_chr7_113313620_f	6	+	507	11	1	0.500039	0.000587
chr7	113314089	113314090	Arntl_NM_001243048_utr3_16_0_chr7_113313620_f,Arntl_NM_001357070_utr3_19_0_chr7_113313620_f,Arntl_NM_007489_utr3_19_0_chr7_113313620_f	5	+	507	5	1	0.500039	0.000587
chr5	145108599	145108600	Arpc1a_NM_019767_utr3_9_0_chr5_145108416_f	8	+	341	12	1	0.157537	0.00113
chr5	145108608	145108610	Arpc1a_NM_019767_utr3_9_0_chr5_145108416_f	10	+	341	16	2	0.157537	0.000264
chr5	145108613	145108614	Arpc1a_NM_019767_utr3_9_0_chr5_145108416_f	9	+	341	10	1	0.157537	9.8e-05
chr5	145108618	145108619	Arpc1a_NM_019767_utr3_9_0_chr5_145108416_f	4	+	341	4	1	0.157537	0.00113
chr5	145108638	145108640	Arpc1a_NM_019767_utr3_9_0_chr5_145108416_f	19	+	341	27	2	0.157537	0.000519
chr5	145108670	145108671	Arpc1a_NM_019767_utr3_9_0_chr5_145108416_f	11	+	341	11	1	0.157537	0.000885
chr1	74268085	74268087	Arpc2_NM_001357387_utr3_10_0_chr1_74267796_f,Arpc2_NM_029711_utr3_9_0_chr1_74267796_f	20	+	414	31	2	0	0.00231
chr5	122406098	122406099	Arpc3_NM_019824_utr3_6_0_chr5_122405932_f	6	+	250	6	1	0	0.00464
chr1	152774536	152774537	Arpc5_NM_026369_utr3_3_0_chr1_152774323_f	26	+	1258	33	1	0	0.00326
chr1	152775524	152775525	Arpc5_NM_026369_utr3_3_0_chr1_152774323_f	13	+	1258	17	1	0	0.00166
chr2	39015421	39015422	Arpc5l_NM_028809_utr3_3_0_chr2_39015121_f	13	+	752	17	1	0.382872	0.000888
chr13	80893659	80893661	Arrdc3_NM_001042591_utr3_7_0_chr13_80893427_f	11	+	2617	19	2	0.0821093	0.00114
chr13	80893877	80893878	Arrdc3_NM_001042591_utr3_7_0_chr13_80893427_f	7	+	2617	7	1	0.0821093	0.00155
chr13	80893948	80893949	Arrdc3_NM_001042591_utr3_7_0_chr13_80893427_f	9	+	2617	9	1	0.0821093	0.00155
chr13	80893954	80893955	Arrdc3_NM_001042591_utr3_7_0_chr13_80893427_f	10	+	2617	10	1	0.0821093	0.00114
chr13	80893961	80893963	Arrdc3_NM_001042591_utr3_7_0_chr13_80893427_f	12	+	2617	14	2	0.0821093	0.000475
chr13	80893965	80893966	Arrdc3_NM_001042591_utr3_7_0_chr13_80893427_f	14	+	2617	14	1	0.0821093	4.11e-05
chr13	80893968	80893971	Arrdc3_NM_001042591_utr3_7_0_chr13_80893427_f	29	+	2617	47	3	0.0821093	0.000202
chr13	80893974	80893976	Arrdc3_NM_001042591_utr3_7_0_chr13_80893427_f	36	+	2617	54	2	0.0821093	1.01e-05
chr13	80893989	80893990	Arrdc3_NM_001042591_utr3_7_0_chr13_80893427_f	5	+	2617	8	1	0.0821093	0.000709
chr13	80894048	80894049	Arrdc3_NM_001042591_utr3_7_0_chr13_80893427_f	9	+	2617	9	1	0.0821093	0.000605
chr13	80894077	80894078	Arrdc3_NM_001042591_utr3_7_0_chr13_80893427_f	6	+	2617	10	1	0.0821093	0.000758
chr13	80894119	80894121	Arrdc3_NM_001042591_utr3_7_0_chr13_80893427_f	12	+	2617	20	2	0.0821093	0.000758
chr13	80894209	80894210	Arrdc3_NM_001042591_utr3_7_0_chr13_80893427_f	6	+	2617	6	1	0.0821093	0.00155
chr13	80894266	80894267	Arrdc3_NM_001042591_utr3_7_0_chr13_80893427_f	6	+	2617	6	1	0.0821093	0.00155
chr13	80894337	80894338	Arrdc3_NM_001042591_utr3_7_0_chr13_80893427_f	7	+	2617	7	1	0.0821093	0.000758
chr13	80894350	80894351	Arrdc3_NM_001042591_utr3_7_0_chr13_80893427_f	42	+	2617	53	1	0.0821093	4.91e-06
chr13	80894369	80894370	Arrdc3_NM_001042591_utr3_7_0_chr13_80893427_f	10	+	2617	10	1	0.0821093	0.000758
chr13	80894380	80894381	Arrdc3_NM_001042591_utr3_7_0_chr13_80893427_f	37	+	2617	37	1	0.0821093	2.03e-05
chr13	80894386	80894387	Arrdc3_NM_001042591_utr3_7_0_chr13_80893427_f	6	+	2617	10	1	0.0821093	0.000709
chr13	80894393	80894397	Arrdc3_NM_001042591_utr3_7_0_chr13_80893427_f	18	+	2617	34	4	0.0821093	0.000202
chr13	80894409	80894410	Arrdc3_NM_001042591_utr3_7_0_chr13_80893427_f	6	+	2617	10	1	0.0821093	0.000654
chr13	80894458	80894459	Arrdc3_NM_001042591_utr3_7_0_chr13_80893427_f	9	+	2617	9	1	0.0821093	0.000475
chr13	80894564	80894565	Arrdc3_NM_001042591_utr3_7_0_chr13_80893427_f	4	+	2617	4	1	0.0821093	0.00155
chr13	80894797	80894800	Arrdc3_NM_001042591_utr3_7_0_chr13_80893427_f	17	+	2617	31	3	0.0821093	0.000135
chr13	80894822	80894823	Arrdc3_NM_001042591_utr3_7_0_chr13_80893427_f	6	+	2617	6	1	0.0821093	0.00155
chr13	80894848	80894849	Arrdc3_NM_001042591_utr3_7_0_chr13_80893427_f	8	+	2617	8	1	0.0821093	0.0003
chr13	80894869	80894870	Arrdc3_NM_001042591_utr3_7_0_chr13_80893427_f	10	+	2617	14	1	0.0821093	0.000455
chr13	80894878	80894879	Arrdc3_NM_001042591_utr3_7_0_chr13_80893427_f	5	+	2617	13	1	0.0821093	0.00114
chr13	80894880	80894881	Arrdc3_NM_001042591_utr3_7_0_chr13_80893427_f	6	+	2617	13	1	0.0821093	0.000455
chr13	80895602	80895603	Arrdc3_NM_001042591_utr3_7_0_chr13_80893427_f	12	+	2617	12	1	0.0821093	0.000307
chr13	80895672	80895673	Arrdc3_NM_001042591_utr3_7_0_chr13_80893427_f	10	+	2617	10	1	0.0821093	0.00114
chr13	80895735	80895736	Arrdc3_NM_001042591_utr3_7_0_chr13_80893427_f	5	+	2617	9	1	0.0821093	0.00155
chr13	80895798	80895799	Arrdc3_NM_001042591_utr3_7_0_chr13_80893427_f	17	+	2617	21	1	0.0821093	3.61e-05
chr13	80895819	80895820	Arrdc3_NM_001042591_utr3_7_0_chr13_80893427_f	17	+	2617	25	1	0.0821093	0.000475
chr13	80895848	80895849	Arrdc3_NM_001042591_utr3_7_0_chr13_80893427_f	11	+	2617	14	1	0.0821093	0.000101
chr13	80895949	80895951	Arrdc3_NM_001042591_utr3_7_0_chr13_80893427_f	18	+	2617	32	2	0.0821093	6.22e-05
chr13	80895975	80895976	Arrdc3_NM_001042591_utr3_7_0_chr13_80893427_f	11	+	2617	11	1	0.0821093	0.000297
chr13	80895995	80895996	Arrdc3_NM_001042591_utr3_7_0_chr13_80893427_f	6	+	2617	6	1	0.0821093	0.000758
chr7	68737758	68737759	Arrdc4_NM_001042592_utr3_0_0_chr7_68736994_r	12	-	2483	16	1	0	0.000277
chr8	41340774	41340775	Asah1_NM_019734_utr3_0_0_chr8_41340646_r	10	-	950	10	1	0.055235	0.000864
chr8	41340781	41340782	Asah1_NM_019734_utr3_0_0_chr8_41340646_r	16	-	950	16	1	0.055235	0.000304
chr8	41341256	41341257	Asah1_NM_019734_utr3_0_0_chr8_41340646_r	7	-	950	7	1	0.055235	0.000324
chr8	41341439	41341440	Asah1_NM_019734_utr3_0_0_chr8_41340646_r	5	-	950	5	1	0.055235	0.00136
chr11	31101338	31101339	Asb3_NM_023906_utr3_9_0_chr11_31101243_f	7	+	1462	15	1	0	0.000212
chr15	98135000	98135001	Asb8_NM_001170710_utr3_0_0_chr15_98134640_r,Asb8_NM_001170711_utr3_0_0_chr15_98134640_r,Asb8_NM_030121_utr3_0_0_chr15_98134640_r	6	-	1166	11	1	0	0.0079
chr10	50850948	50850949	Ascc3_NM_198007_utr3_41_0_chr10_50850594_f	4	+	609	4	1	0	0.00121
chr10	53607976	53607977	Asf1a_NM_025541_utr3_3_0_chr10_53607878_f	8	+	1338	8	1	1.05815	0.000425
chr10	53608077	53608078	Asf1a_NM_025541_utr3_3_0_chr10_53607878_f	7	+	1338	7	1	1.05815	0.000109
chr10	53608088	53608089	Asf1a_NM_025541_utr3_3_0_chr10_53607878_f	11	+	1338	11	1	1.05815	0.000307
chr6	18051081	18051082	Asz1_NM_023729_utr3_0_0_chr6_18050964_r	20	-	287	20	1	0	0.00284
chr19	32672593	32672594	Atad1_NM_026487_utr3_0_0_chr19_32672563_r	12	-	1681	12	1	0	0.00615
chr19	32673373	32673374	Atad1_NM_026487_utr3_0_0_chr19_32672563_r	14	-	1681	14	1	0	0.00446
chr19	32673402	32673403	Atad1_NM_026487_utr3_0_0_chr19_32672563_r	9	-	1681	9	1	0	0.00864
chr19	32673409	32673410	Atad1_NM_026487_utr3_0_0_chr19_32672563_r	50	-	1681	50	1	0	2.51e-05
chr19	32673428	32673429	Atad1_NM_026487_utr3_0_0_chr19_32672563_r	16	-	1681	16	1	0	0.00223
chr19	32673563	32673564	Atad1_NM_026487_utr3_0_0_chr19_32672563_r	8	-	1681	8	1	0	0.00957
chr15	58094199	58094200	Atad2_NM_027435_utr3_0_0_chr15_58094047_r	35	-	1480	35	1	0	0.000422
chr15	58094312	58094313	Atad2_NM_027435_utr3_0_0_chr15_58094047_r	9	-	1480	9	1	0	0.0069
chr15	58094920	58094921	Atad2_NM_027435_utr3_0_0_chr15_58094047_r	8	-	1480	8	1	0	0.0069
chr15	58095294	58095295	Atad2_NM_027435_utr3_0_0_chr15_58094047_r	22	-	1480	22	1	0	0.00974
chr15	58095346	58095347	Atad2_NM_027435_utr3_0_0_chr15_58094047_r	16	-	1480	16	1	0	0.00356
chr12	5046981	5046983	Atad2b_NM_001099628_utr3_30_0_chr12_5044048_f	6	+	3363	10	2	0	0.00229
chr12	5047229	5047230	Atad2b_NM_001099628_utr3_30_0_chr12_5044048_f	5	+	3363	5	1	0	0.00504
chr12	5047264	5047265	Atad2b_NM_001099628_utr3_30_0_chr12_5044048_f	7	+	3363	7	1	0	0.00242
chr15	100260661	100260662	Atf1_NM_007497_utr3_6_0_chr15_100259960_f	9	+	1289	9	1	0	0.00851
chr15	100260848	100260849	Atf1_NM_007497_utr3_6_0_chr15_100259960_f	10	+	1289	10	1	0	0.00851
chr15	100260997	100260998	Atf1_NM_007497_utr3_6_0_chr15_100259960_f	9	+	1289	9	1	0	0.00528
chr15	100261100	100261101	Atf1_NM_007497_utr3_6_0_chr15_100259960_f	26	+	1289	26	1	0	0.00562
chr15	100261112	100261113	Atf1_NM_007497_utr3_6_0_chr15_100259960_f	31	+	1289	31	1	0	0.00177
chr2	73817375	73817376	Atf2_NM_001025093_utr3_0_0_chr2_73816509_r,Atf2_NM_001284369_utr3_0_0_chr2_73816509_r,Atf2_NM_001284372_utr3_0_0_chr2_73816509_r,Atf2_NM_001284373_utr3_0_0_chr2_73816509_r,Atf2_NM_001284374_utr3_0_0_chr2_73816509_r,Atf2_NM_001284376_utr3_0_0_chr2_73816509_r,Atf2_NM_009715_utr3_0_0_chr2_73816509_r	16	-	2413	16	1	0	0.000633
chr2	73817477	73817478	Atf2_NM_001025093_utr3_0_0_chr2_73816509_r,Atf2_NM_001284369_utr3_0_0_chr2_73816509_r,Atf2_NM_001284372_utr3_0_0_chr2_73816509_r,Atf2_NM_001284373_utr3_0_0_chr2_73816509_r,Atf2_NM_001284374_utr3_0_0_chr2_73816509_r,Atf2_NM_001284376_utr3_0_0_chr2_73816509_r,Atf2_NM_009715_utr3_0_0_chr2_73816509_r	10	-	2413	10	1	0	0.000494
chr16	10242007	10242008	Atf7ip2_NM_153123_utr3_10_0_chr16_10241957_f	18	+	1095	29	1	0	0.00449
chr16	10242009	10242010	Atf7ip2_NM_153123_utr3_10_0_chr16_10241957_f	18	+	1095	29	1	0	0.00268
chr16	10242013	10242014	Atf7ip2_NM_153123_utr3_10_0_chr16_10241957_f	10	+	1095	10	1	0	0.00449
chr16	10242076	10242077	Atf7ip2_NM_153123_utr3_10_0_chr16_10241957_f	8	+	1095	8	1	0	0.00263
chr16	10242124	10242125	Atf7ip2_NM_153123_utr3_10_0_chr16_10241957_f	4	+	1095	4	1	0	0.00804
chr16	10242424	10242425	Atf7ip2_NM_153123_utr3_10_0_chr16_10241957_f	6	+	1095	6	1	0	0.00804
chr15	101290795	101290797	Atg101_NM_026566_utr3_2_0_chr15_101290673_f	16	+	262	16	2	0	0.00104
chr14	47540923	47540924	Atg14_NM_172599_utr3_0_0_chr14_47540893_r	6	-	1944	6	1	0.0365417	0.000709
chr14	47541151	47541152	Atg14_NM_172599_utr3_0_0_chr14_47540893_r	10	-	1944	10	1	0.0365417	0.000243
chr10	44363420	44363421	Atg5_NM_001314013_utr3_6_0_chr10_44363053_f,Atg5_NM_053069_utr3_7_0_chr10_44363053_f	7	+	1247	13	1	0	0.00119
chr10	44363975	44363976	Atg5_NM_001314013_utr3_6_0_chr10_44363053_f,Atg5_NM_053069_utr3_7_0_chr10_44363053_f	4	+	1247	4	1	0	0.00707
chr10	44364031	44364032	Atg5_NM_001314013_utr3_6_0_chr10_44363053_f,Atg5_NM_053069_utr3_7_0_chr10_44363053_f	5	+	1247	8	1	0	0.00193
chr1	71579130	71579131	Atic_NM_026195_utr3_15_0_chr1_71578672_f	7	+	732	12	1	0	0.00411
chr1	71579320	71579321	Atic_NM_026195_utr3_15_0_chr1_71578672_f	9	+	732	9	1	0	0.00563
chr1	71579361	71579362	Atic_NM_026195_utr3_15_0_chr1_71578672_f	8	+	732	12	1	0	0.0015
chr12	69963481	69963482	Atl1_NM_178628_utr3_14_0_chr12_69963339_f	4	+	747	4	1	0.339384	0.00152
chr12	69963614	69963615	Atl1_NM_178628_utr3_14_0_chr12_69963339_f	4	+	747	4	1	0.339384	0.00152
chr12	69963699	69963700	Atl1_NM_178628_utr3_14_0_chr12_69963339_f	10	+	747	10	1	0.339384	0.00152
chr12	69963977	69963978	Atl1_NM_178628_utr3_14_0_chr12_69963339_f	5	+	747	5	1	0.339384	0.000806
chr9	53437231	53437232	Atm_NM_007499_utr3_0_0_chr9_53437122_r	5	-	2624	5	1	0	0.00036
chr3	35855322	35855323	Atp11b_NM_029570_utr3_29_0_chr3_35855187_f	14	+	1090	14	1	0	0.0087
chr3	35855507	35855508	Atp11b_NM_029570_utr3_29_0_chr3_35855187_f	18	+	1090	18	1	0	0.00279
chr3	35855532	35855533	Atp11b_NM_029570_utr3_29_0_chr3_35855187_f	13	+	1090	13	1	0	0.00508
chr3	35856105	35856106	Atp11b_NM_029570_utr3_29_0_chr3_35855187_f	54	+	1090	54	1	0	0.00134
chrX	60224521	60224522	Atp11c_NM_001001798_utr3_0_0_chrX_60223290_r,Atp11c_NM_001037863_utr3_0_0_chrX_60223290_r	8	-	2504	8	1	0	0.000568
chr5	122456368	122456369	Atp2a2_NM_001110140_utr3_0_0_chr5_122456324_r	5	-	827	5	1	0.107047	0.00126
chr10	99023517	99023519	Atp2b1_NM_026482_utr3_20_0_chr10_99023120_f	7	+	3024	13	2	0	0.00235
chr10	99023561	99023563	Atp2b1_NM_026482_utr3_20_0_chr10_99023120_f	9	+	3024	14	2	0	0.00291
chr10	99023581	99023583	Atp2b1_NM_026482_utr3_20_0_chr10_99023120_f	6	+	3024	10	2	0	0.00453
chr10	99023588	99023589	Atp2b1_NM_026482_utr3_20_0_chr10_99023120_f	20	+	3024	20	1	0	0.000254
chr10	99023864	99023865	Atp2b1_NM_026482_utr3_20_0_chr10_99023120_f	11	+	3024	11	1	0	0.00318
chr10	99023886	99023887	Atp2b1_NM_026482_utr3_20_0_chr10_99023120_f	7	+	3024	7	1	0	0.00408
chr10	99023969	99023970	Atp2b1_NM_026482_utr3_20_0_chr10_99023120_f	14	+	3024	18	1	0	0.00199
chr10	99023977	99023978	Atp2b1_NM_026482_utr3_20_0_chr10_99023120_f	11	+	3024	11	1	0	0.00135
chr1	133704261	133704262	Atp2b4_NM_001167949_utr3_0_0_chr1_133702674_r,Atp2b4_NM_213616_utr3_0_0_chr1_133702674_r	4	-	4323	4	1	0.00435426	0.00171
chr10	128090179	128090180	Atp5b_NM_016774_utr3_9_0_chr10_128090120_f	4	+	269	4	1	0.407285	0.00146
chr2	73908483	73908484	Atp5g3_NM_001301721_utr3_0_0_chr2_73908447_r,Atp5g3_NM_001301722_utr3_0_0_chr2_73908447_r,Atp5g3_NM_175015_utr3_0_0_chr2_73908447_r	11	-	247	14	1	0	0.00214
chrX	74304496	74304497	Atp6ap1_NM_018794_utr3_9_0_chrX_74304007_f	8	+	715	8	1	0	0.00342
chrX	12615946	12615948	Atp6ap2_NM_027439_utr3_8_0_chrX_12615874_f	24	+	1178	35	2	0	0.000315
chrX	12615971	12615972	Atp6ap2_NM_027439_utr3_8_0_chrX_12615874_f	9	+	1178	9	1	0	0.00492
chrX	12616071	12616072	Atp6ap2_NM_027439_utr3_8_0_chrX_12615874_f	11	+	1178	11	1	0	0.00677
chrX	12616685	12616686	Atp6ap2_NM_027439_utr3_8_0_chrX_12615874_f	14	+	1178	14	1	0	0.00492
chr16	44087251	44087252	Atp6v1a_NM_007508_utr3_0_0_chr16_44085404_r	7	-	2020	7	1	0	0.00238
chr8	69113533	69113534	Atp6v1b2_NM_007509_utr3_13_0_chr8_69112570_f	11	+	1148	11	1	0	0.00474
chr8	69113554	69113555	Atp6v1b2_NM_007509_utr3_13_0_chr8_69112570_f	9	+	1148	9	1	0	0.00984
chr8	69113605	69113606	Atp6v1b2_NM_007509_utr3_13_0_chr8_69112570_f	10	+	1148	10	1	0	0.005
chr8	69113647	69113648	Atp6v1b2_NM_007509_utr3_13_0_chr8_69112570_f	15	+	1148	25	1	0	0.00695
chr8	69113674	69113675	Atp6v1b2_NM_007509_utr3_13_0_chr8_69112570_f	39	+	1148	41	1	0	0.000218
chr6	29470403	29470404	Atp6v1f_NM_025381_utr3_1_0_chr6_29470269_f	15	+	241	15	1	0	0.00114
chr4	63550326	63550327	Atp6v1g1_NM_024173_utr3_2_0_chr4_63550119_f	9	+	583	13	1	0	0.000527
chr1	5162373	5162375	Atp6v1h_NM_001310442_utr3_12_0_chr1_5162166_f,Atp6v1h_NM_133826_utr3_13_0_chr1_5162166_f	7	+	384	12	2	0	0.00673
chrX	106125919	106125920	Atp7a_NM_001109757_utr3_22_0_chrX_106124616_f,Atp7a_NM_009726_utr3_22_0_chrX_106124616_f	8	+	3545	8	1	0.0254556	0.00151
chrX	106127849	106127850	Atp7a_NM_001109757_utr3_22_0_chrX_106124616_f,Atp7a_NM_009726_utr3_22_0_chrX_106124616_f	5	+	3545	5	1	0.0254556	0.00198
chrX	105797645	105797646	Atrx_NM_009530_utr3_0_0_chrX_105797615_r	4	-	2560	4	1	0	0.00155
chr7	126491763	126491764	Atxn2l_NM_001347658_utr3_0_0_chr7_126491708_r,Atxn2l_NM_183020_utr3_0_0_chr7_126491708_r	12	-	961	12	1	0	0.00515
chr7	126491766	126491769	Atxn2l_NM_001347658_utr3_0_0_chr7_126491708_r,Atxn2l_NM_001347658_utr3_0_0_chr7_126491708_r,Atxn2l_NM_183020_utr3_0_0_chr7_126491708_r	8	-	961	17	3	0	0.00497
chr7	126491825	126491826	Atxn2l_NM_001347658_utr3_0_0_chr7_126491708_r,Atxn2l_NM_001347658_utr3_0_0_chr7_126491708_r,Atxn2l_NM_183020_utr3_0_0_chr7_126491708_r	7	-	961	7	1	0	0.00497
chr7	126491834	126491835	Atxn2l_NM_001347658_utr3_0_0_chr7_126491708_r,Atxn2l_NM_183020_utr3_0_0_chr7_126491708_r	15	-	961	15	1	0	0.00604
chr10	112925773	112925774	Atxn7l3b_NM_001033474_utr3_0_0_chr10_112925428_r	5	-	3001	5	1	0.00582842	0.000912
chr10	112925957	112925958	Atxn7l3b_NM_001033474_utr3_0_0_chr10_112925428_r	5	-	3001	5	1	0.00582842	0.000977
chr10	112925959	112925960	Atxn7l3b_NM_001033474_utr3_0_0_chr10_112925428_r	5	-	3001	5	1	0.00582842	0.000912
chr10	112925978	112925979	Atxn7l3b_NM_001033474_utr3_0_0_chr10_112925428_r	8	-	3001	22	1	0.00582842	0.000143
chr10	112925988	112925989	Atxn7l3b_NM_001033474_utr3_0_0_chr10_112925428_r	12	-	3001	12	1	0.00582842	0.00159
chr10	112926652	112926653	Atxn7l3b_NM_001033474_utr3_0_0_chr10_112925428_r	7	-	3001	7	1	0.00582842	0.000977
chr10	112926659	112926661	Atxn7l3b_NM_001033474_utr3_0_0_chr10_112925428_r	6	-	3001	9	2	0.00582842	0.00155
chr10	112926717	112926719	Atxn7l3b_NM_001033474_utr3_0_0_chr10_112925428_r	26	-	3001	41	2	0.00582842	1.15e-05
chr10	112926757	112926758	Atxn7l3b_NM_001033474_utr3_0_0_chr10_112925428_r	12	-	3001	12	1	0.00582842	0.000538
chr10	112926759	112926762	Atxn7l3b_NM_001033474_utr3_0_0_chr10_112925428_r	26	-	3001	64	3	0.00582842	3.26e-09
chr10	112926767	112926768	Atxn7l3b_NM_001033474_utr3_0_0_chr10_112925428_r	5	-	3001	5	1	0.00582842	0.000977
chr10	112926769	112926771	Atxn7l3b_NM_001033474_utr3_0_0_chr10_112925428_r	14	-	3001	24	2	0.00582842	2.2e-06
chr10	112927516	112927517	Atxn7l3b_NM_001033474_utr3_0_0_chr10_112925428_r	7	-	3001	7	1	0.00582842	0.000912
chr5	131437789	131437790	Auts2_NM_177047_utr3_0_0_chr5_131437682_r	7	-	1754	12	1	0	0.00349
chr5	131437796	131437797	Auts2_NM_177047_utr3_0_0_chr5_131437682_r	9	-	1754	22	1	0	0.00246
chr5	131437804	131437810	Auts2_NM_177047_utr3_0_0_chr5_131437682_r	20	-	1754	67	6	0	0.00349
chr5	131439266	131439267	Auts2_NM_177047_utr3_0_0_chr5_131437682_r	5	-	1754	5	1	0	0.00651
chr6	56761715	56761716	Avl9_NM_030235_utr3_15_0_chr6_56757388_f	6	+	4524	6	1	0	0.000332
chr11	108950363	108950364	Axin2_NM_015732_utr3_10_0_chr11_108949396_f	11	+	1386	11	1	0.0263492	0.00151
chr11	108950594	108950595	Axin2_NM_015732_utr3_10_0_chr11_108949396_f	6	+	1386	6	1	0.0263492	0.0029
chr11	108950701	108950702	Axin2_NM_015732_utr3_10_0_chr11_108949396_f	12	+	1386	12	1	0.0263492	0.00101
chr15	38488349	38488350	Azin1_NM_001102458_utr3_0_0_chr15_38487430_r,Azin1_NM_001301688_utr3_0_0_chr15_38487430_r,Azin1_NM_018745_utr3_0_0_chr15_38487430_r	8	-	2938	8	1	0	0.00903
chr15	38489070	38489071	Azin1_NM_001102458_utr3_0_0_chr15_38487430_r,Azin1_NM_001301688_utr3_0_0_chr15_38487430_r,Azin1_NM_018745_utr3_0_0_chr15_38487430_r	16	-	2938	16	1	0	0.00618
chr15	38489181	38489182	Azin1_NM_001102458_utr3_0_0_chr15_38487430_r,Azin1_NM_001301688_utr3_0_0_chr15_38487430_r,Azin1_NM_018745_utr3_0_0_chr15_38487430_r	7	-	2938	7	1	0	0.00618
chr15	38489608	38489609	Azin1_NM_001102458_utr3_0_0_chr15_38487430_r,Azin1_NM_001301688_utr3_0_0_chr15_38487430_r,Azin1_NM_018745_utr3_0_0_chr15_38487430_r	12	-	2938	12	1	0	0.00217
chr15	38489627	38489628	Azin1_NM_001102458_utr3_0_0_chr15_38487430_r,Azin1_NM_001301688_utr3_0_0_chr15_38487430_r,Azin1_NM_018745_utr3_0_0_chr15_38487430_r	9	-	2938	14	1	0	0.00903
chr15	38489678	38489679	Azin1_NM_001102458_utr3_0_0_chr15_38487430_r,Azin1_NM_001301688_utr3_0_0_chr15_38487430_r,Azin1_NM_018745_utr3_0_0_chr15_38487430_r	8	-	2938	8	1	0	0.00783
chr15	38489716	38489718	Azin1_NM_001102458_utr3_0_0_chr15_38487430_r,Azin1_NM_001301688_utr3_0_0_chr15_38487430_r,Azin1_NM_018745_utr3_0_0_chr15_38487430_r	15	-	2938	22	2	0	0.00076
chr15	38489845	38489846	Azin1_NM_001102458_utr3_0_0_chr15_38487430_r,Azin1_NM_001301688_utr3_0_0_chr15_38487430_r,Azin1_NM_018745_utr3_0_0_chr15_38487430_r	8	-	2938	8	1	0	0.00471
chr15	38489882	38489883	Azin1_NM_001102458_utr3_0_0_chr15_38487430_r,Azin1_NM_001301688_utr3_0_0_chr15_38487430_r,Azin1_NM_018745_utr3_0_0_chr15_38487430_r	11	-	2938	11	1	0	0.00511
chr15	38489940	38489941	Azin1_NM_001102458_utr3_0_0_chr15_38487430_r,Azin1_NM_001301688_utr3_0_0_chr15_38487430_r,Azin1_NM_018745_utr3_0_0_chr15_38487430_r	15	-	2938	15	1	0	0.00304
chr15	38490008	38490009	Azin1_NM_001102458_utr3_0_0_chr15_38487430_r,Azin1_NM_001301688_utr3_0_0_chr15_38487430_r,Azin1_NM_018745_utr3_0_0_chr15_38487430_r	14	-	2938	20	1	0	0.00184
chr15	38490121	38490122	Azin1_NM_001102458_utr3_0_0_chr15_38487430_r,Azin1_NM_001301688_utr3_0_0_chr15_38487430_r,Azin1_NM_018745_utr3_0_0_chr15_38487430_r	8	-	2938	8	1	0	0.00903
chr2	122152691	122152692	B2m_NM_009735_utr3_3_0_chr2_122152651_f	6	+	432	12	1	0.671388	0.000306
chr1	23845657	23845658	B3gat2_NM_172124_utr3_3_0_chr1_23845188_f	11	+	2671	11	1	0	0.000131
chr16	19772155	19772156	B3gnt5_NM_001159407_utr3_5_0_chr16_19770164_f,B3gnt5_NM_001159408_utr3_4_0_chr16_19770164_f,B3gnt5_NM_054052_utr3_3_0_chr16_19770164_f	12	+	2590	12	1	0	0.00013
chr4	40806474	40806475	B4galt1_NM_022305_utr3_0_0_chr4_40804582_r	7	-	2603	12	1	0	0.00115
chr4	40806646	40806647	B4galt1_NM_022305_utr3_0_0_chr4_40804582_r	14	-	2603	20	1	0	0.000364
chr2	167298486	167298487	B4galt5_NM_019835_utr3_0_0_chr2_167298445_r	16	-	2891	16	1	0.015311	0.000385
chr2	167298612	167298613	B4galt5_NM_019835_utr3_0_0_chr2_167298445_r	8	-	2891	8	1	0.015311	0.000226
chr2	167299634	167299635	B4galt5_NM_019835_utr3_0_0_chr2_167298445_r	7	-	2891	7	1	0.015311	0.000589
chr2	167299776	167299777	B4galt5_NM_019835_utr3_0_0_chr2_167298445_r	8	-	2891	8	1	0.015311	0.00167
chr2	167300641	167300642	B4galt5_NM_019835_utr3_0_0_chr2_167298445_r	5	-	2891	5	1	0.015311	0.000977
chr2	167300643	167300644	B4galt5_NM_019835_utr3_0_0_chr2_167298445_r	9	-	2891	9	1	0.015311	0.000585
chr2	167300730	167300731	B4galt5_NM_019835_utr3_0_0_chr2_167298445_r	22	-	2891	22	1	0.015311	3.81e-05
chr8	25767464	25767465	Bag4_NM_026121_utr3_0_0_chr8_25764539_r	7	-	3385	7	1	0.253938	0.000664
chr8	25767557	25767558	Bag4_NM_026121_utr3_0_0_chr8_25764539_r	8	-	3385	12	1	0.253938	0.000281
chr2	118924320	118924321	Bahd1_NM_001045523_utr3_6_0_chr2_118922573_f	15	+	1952	19	1	0	0.00095
chr2	118924380	118924381	Bahd1_NM_001045523_utr3_6_0_chr2_118922573_f	6	+	1952	6	1	0	0.00362
chr2	118924416	118924417	Bahd1_NM_001045523_utr3_6_0_chr2_118922573_f	8	+	1952	8	1	0	0.00362
chr2	118924422	118924425	Bahd1_NM_001045523_utr3_6_0_chr2_118922573_f	10	+	1952	23	3	0	0.00329
chr2	118924458	118924459	Bahd1_NM_001045523_utr3_6_0_chr2_118922573_f	5	+	1952	5	1	0	0.00615
chr19	5364719	5364720	Banf1_NM_001038231_utr3_0_0_chr19_5364633_r,Banf1_NM_001286608_utr3_0_0_chr19_5364633_r,Banf1_NM_011793_utr3_0_0_chr19_5364633_r	10	-	379	10	1	0.116792	0.000122
chr19	5364852	5364853	Banf1_NM_001038231_utr3_0_0_chr19_5364633_r,Banf1_NM_001286608_utr3_0_0_chr19_5364633_r,Banf1_NM_011793_utr3_0_0_chr19_5364633_r	6	-	379	6	1	0.116792	0.00142
chr19	5364970	5364971	Banf1_NM_001038231_utr3_0_0_chr19_5364633_r,Banf1_NM_001286608_utr3_0_0_chr19_5364633_r,Banf1_NM_011793_utr3_0_0_chr19_5364633_r	6	-	379	6	1	0.116792	0.00142
chr5	135245288	135245289	Baz1b_NM_011714_utr3_18_0_chr5_135244464_f	9	+	1666	13	1	0.0322449	0.00241
chr5	135245296	135245298	Baz1b_NM_011714_utr3_18_0_chr5_135244464_f	9	+	1666	14	2	0.0322449	0.000373
chr5	135245316	135245317	Baz1b_NM_011714_utr3_18_0_chr5_135244464_f	10	+	1666	10	1	0.0322449	0.00082
chr5	135245323	135245325	Baz1b_NM_011714_utr3_18_0_chr5_135244464_f	30	+	1666	30	2	0.0322449	1.59e-05
chr5	135245326	135245327	Baz1b_NM_011714_utr3_18_0_chr5_135244464_f	10	+	1666	10	1	0.0322449	0.00164
chr5	135245339	135245341	Baz1b_NM_011714_utr3_18_0_chr5_135244464_f	16	+	1666	26	2	0.0322449	0.000111
chr5	135245413	135245415	Baz1b_NM_011714_utr3_18_0_chr5_135244464_f	12	+	1666	16	2	0.0322449	0.00179
chr5	135245428	135245429	Baz1b_NM_011714_utr3_18_0_chr5_135244464_f	11	+	1666	11	1	0.0322449	0.00055
chr5	135245435	135245436	Baz1b_NM_011714_utr3_18_0_chr5_135244464_f	12	+	1666	13	1	0.0322449	0.000269
chr5	135245649	135245650	Baz1b_NM_011714_utr3_18_0_chr5_135244464_f	4	+	1666	8	1	0.0322449	0.00179
chr5	135245660	135245662	Baz1b_NM_011714_utr3_18_0_chr5_135244464_f	14	+	1666	24	2	0.0322449	0.000111
chr5	135245679	135245680	Baz1b_NM_011714_utr3_18_0_chr5_135244464_f	9	+	1666	19	1	0.0322449	0.00014
chr5	135245681	135245682	Baz1b_NM_011714_utr3_18_0_chr5_135244464_f	26	+	1666	26	1	0.0322449	2.9e-05
chr5	135245690	135245692	Baz1b_NM_011714_utr3_18_0_chr5_135244464_f	15	+	1666	23	2	0.0322449	0.000272
chr5	135246093	135246094	Baz1b_NM_011714_utr3_18_0_chr5_135244464_f	24	+	1666	28	1	0.0322449	0.000237
chr10	128128485	128128486	Baz2a_NM_054078_utr3_29_0_chr10_128126754_f	5	+	2550	5	1	0.106165	0.00146
chr10	128129138	128129139	Baz2a_NM_054078_utr3_29_0_chr10_128126754_f	6	+	2550	6	1	0.106165	0.00146
chr10	128129182	128129184	Baz2a_NM_054078_utr3_29_0_chr10_128126754_f	12	+	2550	22	2	0.106165	0.000787
chr2	59899640	59899641	Baz2b_NM_001001182_utr3_0_0_chr2_59899363_r	6	-	1286	6	1	0	0.000364
chr19	53929674	53929675	Bbip1_NM_001195338_utr3_0_0_chr19_53929659_r,Bbip1_NM_001195348_utr3_0_0_chr19_53929659_r	6	-	1686	11	1	0	0.000659
chr19	53929703	53929704	Bbip1_NM_001195338_utr3_0_0_chr19_53929659_r,Bbip1_NM_001195348_utr3_0_0_chr19_53929659_r	9	-	1686	9	1	0	0.000858
chr19	53929750	53929751	Bbip1_NM_001195338_utr3_0_0_chr19_53929659_r,Bbip1_NM_001195348_utr3_0_0_chr19_53929659_r	9	-	1686	9	1	0	0.00265
chr13	24812850	24812851	BC005537_NM_024473_utr3_4_0_chr13_24812763_f	10	+	137	10	1	0	0.00802
chr10	121751186	121751187	BC048403_NM_173022_utr3_2_0_chr10_121751120_f	9	+	1740	9	1	0	0.00109
chr12	31595412	31595413	Bcap29_NM_001164090_utr3_0_0_chr12_31595354_r,Bcap29_NM_007530_utr3_0_0_chr12_31595354_r	8	-	988	8	1	0	0.000697
chrX	73686258	73686259	Bcap31_NM_001313698_utr3_0_0_chrX_73686178_r,Bcap31_NM_012060_utr3_0_0_chrX_73686178_r	11	-	379	11	1	0	0.00526
chrX	73686261	73686262	Bcap31_NM_001313698_utr3_0_0_chrX_73686178_r,Bcap31_NM_012060_utr3_0_0_chrX_73686178_r	8	-	379	8	1	0	0.00337
chr3	103178653	103178654	Bcas2_NM_001356330_utr3_5_0_chr3_103178482_f,Bcas2_NM_001356331_utr3_6_0_chr3_103178482_f,Bcas2_NM_026602_utr3_6_0_chr3_103178482_f	18	+	673	18	1	0	0.0071
chr3	103178693	103178694	Bcas2_NM_001356330_utr3_5_0_chr3_103178482_f,Bcas2_NM_001356331_utr3_6_0_chr3_103178482_f,Bcas2_NM_026602_utr3_6_0_chr3_103178482_f	23	+	673	23	1	0	0.00588
chr3	103178727	103178728	Bcas2_NM_001356330_utr3_5_0_chr3_103178482_f,Bcas2_NM_001356331_utr3_6_0_chr3_103178482_f,Bcas2_NM_026602_utr3_6_0_chr3_103178482_f	26	+	673	26	1	0	0.0071
chr3	103178767	103178768	Bcas2_NM_001356330_utr3_5_0_chr3_103178482_f,Bcas2_NM_001356331_utr3_6_0_chr3_103178482_f,Bcas2_NM_026602_utr3_6_0_chr3_103178482_f	34	+	673	34	1	0	0.0071
chr3	103178796	103178797	Bcas2_NM_001356330_utr3_5_0_chr3_103178482_f,Bcas2_NM_001356331_utr3_6_0_chr3_103178482_f,Bcas2_NM_026602_utr3_6_0_chr3_103178482_f	14	+	673	14	1	0	0.0074
chr3	145933541	145933542	Bcl10_NM_009740_utr3_2_0_chr3_145933307_f	6	+	1058	6	1	0.0345179	0.0017
chr3	145933845	145933847	Bcl10_NM_009740_utr3_2_0_chr3_145933307_f	5	+	1058	10	2	0.0345179	0.0017
chr3	145934175	145934176	Bcl10_NM_009740_utr3_2_0_chr3_145933307_f	5	+	1058	5	1	0.0345179	0.0017
chr11	70224836	70224837	Bcl6b_NM_007528_utr3_0_0_chr11_70224127_r	7	-	1900	7	1	0.153872	0.000645
chr11	70225447	70225448	Bcl6b_NM_007528_utr3_0_0_chr11_70224127_r	8	-	1900	8	1	0.153872	0.000887
chr11	70225463	70225464	Bcl6b_NM_007528_utr3_0_0_chr11_70224127_r	5	-	1900	5	1	0.153872	0.000524
chr11	70225707	70225708	Bcl6b_NM_007528_utr3_0_0_chr11_70224127_r	5	-	1900	5	1	0.153872	0.000927
chr5	123372639	123372640	Bcl7a_NM_029850_utr3_5_0_chr5_123371090_f	6	+	2994	6	1	0	0.00152
chr10	20340118	20340119	Bclaf1_NM_001025392_utr3_12_0_chr10_20340058_f,Bclaf1_NM_001025393_utr3_11_0_chr10_20340058_f,Bclaf1_NM_153787_utr3_12_0_chr10_20340058_f	7	+	2444	7	1	0	0.00707
chr10	20340141	20340143	Bclaf1_NM_001025392_utr3_12_0_chr10_20340058_f,Bclaf1_NM_001025393_utr3_11_0_chr10_20340058_f,Bclaf1_NM_153787_utr3_12_0_chr10_20340058_f	7	+	2444	12	2	0	0.00435
chr10	20340184	20340186	Bclaf1_NM_001025392_utr3_12_0_chr10_20340058_f,Bclaf1_NM_001025393_utr3_11_0_chr10_20340058_f,Bclaf1_NM_153787_utr3_12_0_chr10_20340058_f	48	+	2444	91	2	0	5.38e-05
chrX	12037400	12037401	Bcor_NM_001168321_utr3_0_0_chrX_12036738_r,Bcor_NM_029510_utr3_0_0_chrX_12036738_r,Bcor_NM_175044_utr3_0_0_chrX_12036738_r,Bcor_NM_175045_utr3_0_0_chrX_12036738_r,Bcor_NM_175046_utr3_0_0_chrX_12036738_r	11	-	888	16	1	0	0.0031
chrX	48406673	48406674	Bcorl1_NM_178782_utr3_14_0_chrX_48406200_f	7	+	529	11	1	0	0.00651
chr10	75183362	75183363	Bcr_NM_001081412_utr3_22_0_chr10_75182330_f	5	+	2594	5	1	0.0488666	0.00164
chr13	100019104	100019105	Bdp1_NM_001081061_utr3_0_0_chr13_100017994_r	5	-	2285	5	1	0	0.00126
chr11	101288512	101288513	Becn1_NM_019584_utr3_0_0_chr11_101288267_r	12	-	546	12	1	0.275244	0.000787
chr11	101288524	101288526	Becn1_NM_019584_utr3_0_0_chr11_101288267_r	13	-	546	32	2	0.275244	4.63e-05
chr11	101288533	101288534	Becn1_NM_019584_utr3_0_0_chr11_101288267_r	28	-	546	28	1	0.275244	2.56e-05
chr11	101288540	101288541	Becn1_NM_019584_utr3_0_0_chr11_101288267_r	5	-	546	5	1	0.275244	0.00107
chr11	101288550	101288552	Becn1_NM_019584_utr3_0_0_chr11_101288267_r	20	-	546	35	2	0.275244	6.83e-05
chr11	101288590	101288591	Becn1_NM_019584_utr3_0_0_chr11_101288267_r	18	-	546	36	1	0.275244	3.38e-05
chr11	101288762	101288764	Becn1_NM_019584_utr3_0_0_chr11_101288267_r	17	-	546	23	2	0.275244	4.04e-06
chr11	101288778	101288779	Becn1_NM_019584_utr3_0_0_chr11_101288267_r	10	-	546	10	1	0.275244	0.000103
chr11	101288793	101288794	Becn1_NM_019584_utr3_0_0_chr11_101288267_r	5	-	546	9	1	0.275244	0.000787
chr5	67392302	67392303	Bend4_NM_001164806_utr3_0_0_chr5_67392147_r	5	-	6089	5	1	0.00287257	0.00175
chr5	67392321	67392322	Bend4_NM_001164806_utr3_0_0_chr5_67392147_r	20	-	6089	20	1	0.00287257	0.000614
chr6	145861447	145861448	Bhlhe41_NM_001271768_utr3_0_0_chr6_145858243_r,Bhlhe41_NM_024469_utr3_0_0_chr6_145858243_r	9	-	5575	9	1	0.0348964	0.000716
chr6	145862312	145862313	Bhlhe41_NM_001271768_utr3_0_0_chr6_145858243_r,Bhlhe41_NM_024469_utr3_0_0_chr6_145858243_r	5	-	5575	5	1	0.0348964	0.00128
chr10	70923804	70923805	Bicc1_NM_001347189_utr3_0_0_chr10_70922830_r,Bicc1_NM_031397_utr3_0_0_chr10_70922830_r	4	-	2549	4	1	0	0.00107
chr13	49385090	49385091	Bicd2_NM_001039179_utr3_6_0_chr13_49383353_f,Bicd2_NM_001039180_utr3_8_0_chr13_49384977_f,Bicd2_NM_029791_utr3_7_0_chr13_49384977_f	4	+	3674	4	1	0.0262049	0.00294
chr13	49385580	49385581	Bicd2_NM_001039179_utr3_6_0_chr13_49383353_f,Bicd2_NM_001039180_utr3_8_0_chr13_49384977_f,Bicd2_NM_029791_utr3_7_0_chr13_49384977_f	15	+	3674	15	1	0.0262049	0.000185
chr13	49385670	49385671	Bicd2_NM_001039179_utr3_6_0_chr13_49383353_f,Bicd2_NM_001039180_utr3_8_0_chr13_49384977_f,Bicd2_NM_029791_utr3_7_0_chr13_49384977_f	9	+	3674	16	1	0.0262049	0.00223
chr13	49385688	49385689	Bicd2_NM_001039179_utr3_6_0_chr13_49383353_f,Bicd2_NM_001039180_utr3_8_0_chr13_49384977_f,Bicd2_NM_029791_utr3_7_0_chr13_49384977_f	10	+	3674	10	1	0.0262049	0.00152
chr13	49386641	49386642	Bicd2_NM_001039179_utr3_6_0_chr13_49383353_f,Bicd2_NM_001039180_utr3_8_0_chr13_49384977_f,Bicd2_NM_029791_utr3_7_0_chr13_49384977_f	11	+	3674	11	1	0.0262049	0.00146
chr13	49386669	49386670	Bicd2_NM_001039179_utr3_6_0_chr13_49383353_f,Bicd2_NM_001039180_utr3_8_0_chr13_49384977_f,Bicd2_NM_029791_utr3_7_0_chr13_49384977_f	7	+	3674	7	1	0.0262049	0.00101
chr13	49386744	49386745	Bicd2_NM_001039179_utr3_6_0_chr13_49383353_f,Bicd2_NM_001039180_utr3_8_0_chr13_49384977_f,Bicd2_NM_029791_utr3_7_0_chr13_49384977_f	18	+	3674	18	1	0.0262049	0.000289
chr13	49386773	49386774	Bicd2_NM_001039179_utr3_6_0_chr13_49383353_f,Bicd2_NM_001039180_utr3_8_0_chr13_49384977_f,Bicd2_NM_029791_utr3_7_0_chr13_49384977_f	8	+	3674	13	1	0.0262049	0.000704
chr17	74702609	74702610	Birc6_NM_007566_utr3_72_0_chr17_74702384_f	7	+	973	7	1	0	0.00196
chr2	157556392	157556393	Blcap_NM_001355426_utr3_0_0_chr2_157556362_r,Blcap_NM_016916_utr3_0_0_chr2_157556362_r	5	-	1528	5	1	0	0.00883
chr2	157556404	157556405	Blcap_NM_001355426_utr3_0_0_chr2_157556362_r,Blcap_NM_016916_utr3_0_0_chr2_157556362_r	11	-	1528	11	1	0	0.00232
chr2	157556875	157556876	Blcap_NM_001355426_utr3_0_0_chr2_157556362_r,Blcap_NM_016916_utr3_0_0_chr2_157556362_r	10	-	1528	10	1	0	0.00578
chr2	157556943	157556944	Blcap_NM_001355426_utr3_0_0_chr2_157556362_r,Blcap_NM_016916_utr3_0_0_chr2_157556362_r	5	-	1528	5	1	0	0.00883
chr2	157557462	157557463	Blcap_NM_001355426_utr3_0_0_chr2_157556362_r,Blcap_NM_016916_utr3_0_0_chr2_157556362_r	12	-	1528	18	1	0	0.000946
chr7	80455188	80455189	Blm_NM_001042527_utr3_0_0_chr7_80454993_r,Blm_NM_007550_utr3_0_0_chr7_80454993_r	7	-	266	13	1	0	0.00282
chr7	80455234	80455235	Blm_NM_001042527_utr3_0_0_chr7_80454993_r,Blm_NM_007550_utr3_0_0_chr7_80454993_r	6	-	266	6	1	0	0.00428
chr2	122747707	122747708	Bloc1s6_NM_019788_utr3_4_0_chr2_122746631_f	17	+	2857	17	1	0.0188029	0.00213
chr2	18684737	18684738	Bmi1_NM_007552_utr3_9_0_chr2_18684482_f	15	+	2148	22	1	0	0.00941
chr2	18684982	18684983	Bmi1_NM_007552_utr3_9_0_chr2_18684482_f	6	+	2148	6	1	0	0.00852
chr2	18685333	18685334	Bmi1_NM_007552_utr3_9_0_chr2_18684482_f	13	+	2148	13	1	0	0.00443
chr2	18685630	18685631	Bmi1_NM_007552_utr3_9_0_chr2_18684482_f	8	+	2148	8	1	0	0.00781
chr2	18685698	18685699	Bmi1_NM_007552_utr3_9_0_chr2_18684482_f	7	+	2148	7	1	0	0.00852
chr2	18685780	18685781	Bmi1_NM_007552_utr3_9_0_chr2_18684482_f	15	+	2148	15	1	0	0.000573
chr2	18685796	18685797	Bmi1_NM_007552_utr3_9_0_chr2_18684482_f	26	+	2148	26	1	0	0.00234
chr13	38500298	38500299	Bmp6_NM_007556_utr3_6_0_chr13_38499069_f	6	+	1246	6	1	0	0.000367
chr14	34414259	34414260	Bmpr1a_NM_009758_utr3_0_0_chr14_34411068_r	6	-	3476	6	1	0	0.000497
chr7	81966861	81966862	Bnc1_NM_007562_utr3_0_0_chr7_81966662_r	6	-	1681	6	1	0.0318536	0.000876
chr7	81966894	81966895	Bnc1_NM_007562_utr3_0_0_chr7_81966662_r	4	-	1681	8	1	0.0318536	0.00151
chr7	81966917	81966919	Bnc1_NM_007562_utr3_0_0_chr7_81966662_r	13	-	1681	23	2	0.0318536	0.000544
chr7	81967109	81967110	Bnc1_NM_007562_utr3_0_0_chr7_81966662_r	8	-	1681	13	1	0.0318536	0.000522
chr7	81967115	81967116	Bnc1_NM_007562_utr3_0_0_chr7_81966662_r	16	-	1681	16	1	0.0318536	1.52e-05
chr7	81967122	81967123	Bnc1_NM_007562_utr3_0_0_chr7_81966662_r	7	-	1681	7	1	0.0318536	0.000876
chr7	81967244	81967245	Bnc1_NM_007562_utr3_0_0_chr7_81966662_r	5	-	1681	5	1	0.0318536	0.00139
chr7	81967301	81967303	Bnc1_NM_007562_utr3_0_0_chr7_81966662_r	7	-	1681	12	2	0.0318536	0.000876
chr4	84273280	84273281	Bnc2_NM_172870_utr3_0_0_chr4_84272542_r	9	-	3245	9	1	0.00825053	0.000455
chr4	84273282	84273283	Bnc2_NM_172870_utr3_0_0_chr4_84272542_r	6	-	3245	6	1	0.00825053	0.00172
chr4	84273403	84273404	Bnc2_NM_172870_utr3_0_0_chr4_84272542_r	5	-	3245	5	1	0.00825053	0.00161
chr4	84273579	84273581	Bnc2_NM_172870_utr3_0_0_chr4_84272542_r	7	-	3245	14	2	0.00825053	0.000431
chr4	84273587	84273588	Bnc2_NM_172870_utr3_0_0_chr4_84272542_r	9	-	3245	9	1	0.00825053	0.001
chr4	84273692	84273693	Bnc2_NM_172870_utr3_0_0_chr4_84272542_r	9	-	3245	9	1	0.00825053	0.000229
chr4	84273751	84273752	Bnc2_NM_172870_utr3_0_0_chr4_84272542_r	6	-	3245	6	1	0.00825053	0.00103
chr4	84273772	84273774	Bnc2_NM_172870_utr3_0_0_chr4_84272542_r	5	-	3245	13	2	0.00825053	0.00104
chr4	84275115	84275116	Bnc2_NM_172870_utr3_0_0_chr4_84272542_r	9	-	3245	27	1	0.00825053	0.001
chr4	84275117	84275118	Bnc2_NM_172870_utr3_0_0_chr4_84272542_r	9	-	3245	27	1	0.00825053	0.001
chr4	84275121	84275122	Bnc2_NM_172870_utr3_0_0_chr4_84272542_r	9	-	3245	9	1	0.00825053	0.000455
chr4	84275123	84275124	Bnc2_NM_172870_utr3_0_0_chr4_84272542_r	5	-	3245	5	1	0.00825053	0.001
chr4	84275127	84275128	Bnc2_NM_172870_utr3_0_0_chr4_84272542_r	10	-	3245	19	1	0.00825053	0.001
chr4	84275179	84275180	Bnc2_NM_172870_utr3_0_0_chr4_84272542_r	21	-	3245	21	1	0.00825053	0.000104
chr4	84275448	84275449	Bnc2_NM_172870_utr3_0_0_chr4_84272542_r	5	-	3245	9	1	0.00825053	0.001
chr7	138891019	138891022	Bnip3_NM_009760_utr3_0_0_chr7_138890836_r	21	-	1079	42	3	0	0.000118
chr14	66985554	66985555	Bnip3l_NM_009761_utr3_0_0_chr14_66985240_r	6	-	2487	10	1	0	0.0067
chr14	66986563	66986564	Bnip3l_NM_009761_utr3_0_0_chr14_66985240_r	5	-	2487	5	1	0	0.0067
chr14	66986693	66986694	Bnip3l_NM_009761_utr3_0_0_chr14_66985240_r	9	-	2487	9	1	0	0.0024
chr14	66987106	66987107	Bnip3l_NM_009761_utr3_0_0_chr14_66985240_r	7	-	2487	7	1	0	0.00155
chr11	31665223	31665224	Bod1_NM_001024919_utr3_0_0_chr11_31665150_r	11	-	718	11	1	0	0.00622
chr11	31665226	31665227	Bod1_NM_001024919_utr3_0_0_chr11_31665150_r	11	-	718	19	1	0	0.00629
chr11	31665232	31665234	Bod1_NM_001024919_utr3_0_0_chr11_31665150_r	15	-	718	25	2	0	0.000469
chr11	31665240	31665241	Bod1_NM_001024919_utr3_0_0_chr11_31665150_r	8	-	718	8	1	0	0.00927
chr6	39607447	39607448	Braf_NM_139294_utr3_0_0_chr6_39603237_r	5	-	7145	5	1	0.0358716	0.000763
chr5	140719323	140719324	Brat1_NM_001276287_utr3_13_0_chr5_140718598_f,Brat1_NM_181066_utr3_13_0_chr5_140718598_f	8	+	781	8	1	0	0.000563
chr15	88687963	88687964	Brd1_NM_001033274_utr3_0_0_chr15_88687035_r	25	-	1262	25	1	0	0.00161
chr15	88687971	88687972	Brd1_NM_001033274_utr3_0_0_chr15_88687035_r	18	-	1262	23	1	0	0.00357
chr15	88688123	88688124	Brd1_NM_001033274_utr3_0_0_chr15_88687035_r	11	-	1262	11	1	0	0.00346
chr15	88688206	88688207	Brd1_NM_001033274_utr3_0_0_chr15_88687035_r	27	-	1262	27	1	0	0.00346
chr17	34112169	34112170	Brd2_NM_001204973_utr3_0_0_chr17_34112019_r,Brd2_NM_010238_utr3_0_0_chr17_34112019_r	4	-	556	4	1	0	0.00856
chr2	27445609	27445610	Brd3_NM_001113573_utr3_0_0_chr2_27445581_r,Brd3_NM_001113574_utr3_0_0_chr2_27445581_r,Brd3_NM_023336_utr3_0_0_chr2_27445581_r	11	-	2884	11	1	0.00606487	0.000959
chr2	27445750	27445751	Brd3_NM_001113573_utr3_0_0_chr2_27445581_r,Brd3_NM_001113574_utr3_0_0_chr2_27445581_r,Brd3_NM_023336_utr3_0_0_chr2_27445581_r	5	-	2884	5	1	0.00606487	0.00154
chr2	27446180	27446181	Brd3_NM_001113573_utr3_0_0_chr2_27445581_r,Brd3_NM_001113574_utr3_0_0_chr2_27445581_r,Brd3_NM_023336_utr3_0_0_chr2_27445581_r	10	-	2884	10	1	0.00606487	0.000959
chr2	27446710	27446711	Brd3_NM_001113573_utr3_0_0_chr2_27445581_r,Brd3_NM_001113574_utr3_0_0_chr2_27445581_r,Brd3_NM_023336_utr3_0_0_chr2_27445581_r	13	-	2884	13	1	0.00606487	0.000633
chr2	27447328	27447329	Brd3_NM_001113573_utr3_0_0_chr2_27445581_r,Brd3_NM_001113574_utr3_0_0_chr2_27445581_r,Brd3_NM_023336_utr3_0_0_chr2_27445581_r	5	-	2884	5	1	0.00606487	0.000975
chr2	27447353	27447354	Brd3_NM_001113573_utr3_0_0_chr2_27445581_r,Brd3_NM_001113574_utr3_0_0_chr2_27445581_r,Brd3_NM_023336_utr3_0_0_chr2_27445581_r	6	-	2884	6	1	0.00606487	0.00154
chr2	27447369	27447370	Brd3_NM_001113573_utr3_0_0_chr2_27445581_r,Brd3_NM_001113574_utr3_0_0_chr2_27445581_r,Brd3_NM_023336_utr3_0_0_chr2_27445581_r	5	-	2884	8	1	0.00606487	0.000909
chr2	27448080	27448081	Brd3_NM_001113573_utr3_0_0_chr2_27445581_r,Brd3_NM_001113574_utr3_0_0_chr2_27445581_r,Brd3_NM_023336_utr3_0_0_chr2_27445581_r	4	-	2884	4	1	0.00606487	0.00159
chr2	27448348	27448349	Brd3_NM_001113573_utr3_0_0_chr2_27445581_r,Brd3_NM_001113574_utr3_0_0_chr2_27445581_r,Brd3_NM_023336_utr3_0_0_chr2_27445581_r	7	-	2884	7	1	0.00606487	0.00159
chr17	32196445	32196447	Brd4_NM_001286630_utr3_0_0_chr17_32196272_r,Brd4_NM_020508_utr3_0_0_chr17_32196272_r	7	-	1480	8	2	0.0118183	0.000927
chr17	32196452	32196454	Brd4_NM_001286630_utr3_0_0_chr17_32196272_r,Brd4_NM_020508_utr3_0_0_chr17_32196272_r	12	-	1480	25	2	0.0118183	0.000927
chr17	32196457	32196458	Brd4_NM_001286630_utr3_0_0_chr17_32196272_r,Brd4_NM_020508_utr3_0_0_chr17_32196272_r	11	-	1480	11	1	0.0118183	0.000335
chr17	32196590	32196591	Brd4_NM_001286630_utr3_0_0_chr17_32196272_r,Brd4_NM_020508_utr3_0_0_chr17_32196272_r	7	-	1480	8	1	0.0118183	0.000373
chr17	32196674	32196675	Brd4_NM_001286630_utr3_0_0_chr17_32196272_r,Brd4_NM_020508_utr3_0_0_chr17_32196272_r	4	-	1480	4	1	0.0118183	0.00153
chr17	32196697	32196698	Brd4_NM_001286630_utr3_0_0_chr17_32196272_r,Brd4_NM_020508_utr3_0_0_chr17_32196272_r	14	-	1480	14	1	0.0118183	0.000339
chr17	32196793	32196794	Brd4_NM_001286630_utr3_0_0_chr17_32196272_r,Brd4_NM_020508_utr3_0_0_chr17_32196272_r	8	-	1480	16	1	0.0118183	0.000249
chr17	32196799	32196801	Brd4_NM_001286630_utr3_0_0_chr17_32196272_r,Brd4_NM_020508_utr3_0_0_chr17_32196272_r	41	-	1480	88	2	0.0118183	1.53e-05
chr17	32196802	32196803	Brd4_NM_001286630_utr3_0_0_chr17_32196272_r,Brd4_NM_020508_utr3_0_0_chr17_32196272_r	41	-	1480	88	1	0.0118183	0.000208
chr17	32196946	32196947	Brd4_NM_001286630_utr3_0_0_chr17_32196272_r,Brd4_NM_020508_utr3_0_0_chr17_32196272_r	18	-	1480	18	1	0.0118183	0.000335
chr17	32196950	32196952	Brd4_NM_001286630_utr3_0_0_chr17_32196272_r,Brd4_NM_020508_utr3_0_0_chr17_32196272_r	13	-	1480	19	2	0.0118183	2.24e-05
chr17	32196953	32196954	Brd4_NM_001286630_utr3_0_0_chr17_32196272_r,Brd4_NM_020508_utr3_0_0_chr17_32196272_r	7	-	1480	7	1	0.0118183	0.000507
chr8	88332394	88332395	Brd7_NM_012047_utr3_0_0_chr8_88332311_r	11	-	177	11	1	0	0.00868
chr8	88332452	88332453	Brd7_NM_012047_utr3_0_0_chr8_88332311_r	11	-	177	11	1	0	0.008
chr5	107386175	107386176	Brdt_NM_054054_utr3_18_0_chr5_107385527_f	5	+	1532	5	1	0.0238381	0.00221
chr6	113616217	113616218	Brk1_NM_133937_utr3_2_0_chr6_113616092_f	11	+	860	11	1	0	0.00494
chr6	113616324	113616325	Brk1_NM_133937_utr3_2_0_chr6_113616092_f	7	+	860	13	1	0	0.00873
chr6	113616337	113616338	Brk1_NM_133937_utr3_2_0_chr6_113616092_f	11	+	860	11	1	0	0.00596
chr6	113616359	113616360	Brk1_NM_133937_utr3_2_0_chr6_113616092_f	6	+	860	6	1	0	0.0098
chr6	113616572	113616573	Brk1_NM_133937_utr3_2_0_chr6_113616092_f	8	+	860	8	1	0	0.00596
chr6	113616624	113616625	Brk1_NM_133937_utr3_2_0_chr6_113616092_f	18	+	860	28	1	0	0.00873
chr7	142003055	142003056	Brsk2_NM_001009929_utr3_19_0_chr7_142002475_f,Brsk2_NM_001009930_utr3_19_0_chr7_142002233_f,Brsk2_NM_001276763_utr3_19_0_chr7_142002495_f,Brsk2_NM_029426_utr3_18_0_chr7_142002495_f	6	+	2011	6	1	0.433642	0.000614
chr16	96001881	96001882	Brwd1_NM_001103179_utr3_0_0_chr16_96001548_r	4	-	641	4	1	0.0272872	0.00147
chr16	96066928	96066929	Brwd1_NM_176928_utr3_0_0_chr16_96066668_r	9	-	1795	9	1	0	0.00518
chr16	96067707	96067708	Brwd1_NM_176928_utr3_0_0_chr16_96066668_r	7	-	1795	7	1	0	0.00596
chr16	96067822	96067823	Brwd1_NM_176928_utr3_0_0_chr16_96066668_r	5	-	1795	5	1	0	0.00596
chr19	37012063	37012064	Btaf1_NM_001080706_utr3_37_0_chr19_37011405_f	7	+	2653	7	1	0.217052	0.000848
chr7	113315732	113315733	Btbd10_NM_133700_utr3_0_0_chr7_113315644_r	52	-	785	68	1	0	0.000224
chr7	113315770	113315771	Btbd10_NM_133700_utr3_0_0_chr7_113315644_r	20	-	785	20	1	0	0.00387
chr2	138287326	138287327	Btbd3_NM_001025431_utr3_4_0_chr2_138284491_f,Btbd3_NM_145534_utr3_3_0_chr2_138284491_f	6	+	2932	6	1	0	0.000816
chr2	138287364	138287365	Btbd3_NM_001025431_utr3_4_0_chr2_138284491_f,Btbd3_NM_145534_utr3_3_0_chr2_138284491_f	12	+	2932	12	1	0	0.000188
chr12	102784980	102784981	Btbd7_NM_172806_utr3_0_0_chr12_102784648_r	13	-	463	13	1	0	0.00358
chr2	118641533	118641534	Bub1b_NM_009773_utr3_22_0_chr2_118641320_f	5	+	273	5	1	0	0.00284
chr7	131571037	131571038	Bub3_NM_001317350_utr3_7_0_chr7_131570889_f,Bub3_NM_009774_utr3_7_0_chr7_131570889_f	20	+	1004	24	1	0	0.00906
chr7	131571112	131571113	Bub3_NM_001317350_utr3_7_0_chr7_131570889_f,Bub3_NM_009774_utr3_7_0_chr7_131570889_f	5	+	1004	5	1	0	0.00906
chr7	131571128	131571129	Bub3_NM_001317350_utr3_7_0_chr7_131570889_f,Bub3_NM_009774_utr3_7_0_chr7_131570889_f	6	+	1004	6	1	0	0.00862
chr7	131571130	131571131	Bub3_NM_001317350_utr3_7_0_chr7_131570889_f,Bub3_NM_009774_utr3_7_0_chr7_131570889_f	30	+	1004	30	1	0	0.000585
chr7	131571137	131571138	Bub3_NM_001317350_utr3_7_0_chr7_131570889_f,Bub3_NM_009774_utr3_7_0_chr7_131570889_f	6	+	1004	6	1	0	0.00716
chr1	58405331	58405332	Bzw1_NM_025824_utr3_11_0_chr1_58405067_f	12	+	1482	13	1	0.0246423	0.000706
chr1	58406044	58406046	Bzw1_NM_025824_utr3_11_0_chr1_58405067_f	14	+	1482	19	2	0.0246423	0.000321
chr1	58406190	58406193	Bzw1_NM_025824_utr3_11_0_chr1_58405067_f	37	+	1482	63	3	0.0246423	0.000967
chr1	58406196	58406197	Bzw1_NM_025824_utr3_11_0_chr1_58405067_f	8	+	1482	14	1	0.0246423	0.000967
chr1	58406208	58406209	Bzw1_NM_025824_utr3_11_0_chr1_58405067_f	5	+	1482	5	1	0.0246423	0.00153
chr1	58406255	58406256	Bzw1_NM_025824_utr3_11_0_chr1_58405067_f	6	+	1482	6	1	0.0246423	0.0022
chr1	58406519	58406520	Bzw1_NM_025824_utr3_11_0_chr1_58405067_f	4	+	1482	4	1	0.0246423	0.00289
chr11	17266759	17266760	C1d_NM_001330649_utr3_4_0_chr11_17266696_f,C1d_NM_020558_utr3_4_0_chr11_17266696_f	11	+	2481	11	1	0	0.00182
chr11	17266931	17266932	C1d_NM_001330649_utr3_4_0_chr11_17266696_f,C1d_NM_020558_utr3_4_0_chr11_17266696_f	6	+	2481	6	1	0	0.00472
chr11	17266946	17266947	C1d_NM_001330649_utr3_4_0_chr11_17266696_f,C1d_NM_020558_utr3_4_0_chr11_17266696_f	6	+	2481	6	1	0	0.00345
chr11	17267102	17267103	C1d_NM_001330649_utr3_4_0_chr11_17266696_f,C1d_NM_020558_utr3_4_0_chr11_17266696_f	7	+	2481	12	1	0	0.00708
chr11	17267197	17267199	C1d_NM_001330649_utr3_4_0_chr11_17266696_f,C1d_NM_020558_utr3_4_0_chr11_17266696_f	9	+	2481	14	2	0	0.00472
chr11	17267211	17267212	C1d_NM_001330649_utr3_4_0_chr11_17266696_f,C1d_NM_020558_utr3_4_0_chr11_17266696_f	8	+	2481	8	1	0	0.00708
chr1	85849949	85849950	Cab39_NM_001355046_utr3_9_0_chr1_85849222_f,Cab39_NM_001355047_utr3_9_0_chr1_85849222_f,Cab39_NM_133781_utr3_8_0_chr1_85849222_f	14	+	2356	14	1	0	0.00156
chr1	85849979	85849980	Cab39_NM_001355046_utr3_9_0_chr1_85849222_f,Cab39_NM_001355047_utr3_9_0_chr1_85849222_f,Cab39_NM_133781_utr3_8_0_chr1_85849222_f	13	+	2356	13	1	0	0.00387
chr1	85850033	85850034	Cab39_NM_001355046_utr3_9_0_chr1_85849222_f,Cab39_NM_001355047_utr3_9_0_chr1_85849222_f,Cab39_NM_133781_utr3_8_0_chr1_85849222_f	22	+	2356	29	1	0	0.000683
chr1	85850339	85850340	Cab39_NM_001355046_utr3_9_0_chr1_85849222_f,Cab39_NM_001355047_utr3_9_0_chr1_85849222_f,Cab39_NM_133781_utr3_8_0_chr1_85849222_f	11	+	2356	11	1	0	0.00393
chr1	85851411	85851412	Cab39_NM_001355046_utr3_9_0_chr1_85849222_f,Cab39_NM_001355047_utr3_9_0_chr1_85849222_f,Cab39_NM_133781_utr3_8_0_chr1_85849222_f	18	+	2356	18	1	0	0.00227
chr1	85851470	85851471	Cab39_NM_001355046_utr3_9_0_chr1_85849222_f,Cab39_NM_001355047_utr3_9_0_chr1_85849222_f,Cab39_NM_133781_utr3_8_0_chr1_85849222_f	8	+	2356	14	1	0	0.00552
chr14	59548403	59548404	Cab39l_NM_026908_utr3_10_0_chr14_59547166_f	4	+	1738	4	1	0	0.00105
chr2	180258569	180258570	Cables2_NM_145851_utr3_0_0_chr2_180258539_r	8	-	1504	8	1	0.381175	0.000242
chr2	27020562	27020563	Cacfd1_NM_029862_utr3_5_0_chr2_27020021_f	6	+	1069	6	1	0.134668	0.000557
chr19	60524757	60524758	Cacul1_NM_001172096_utr3_0_0_chr19_60524696_r,Cacul1_NM_001172097_utr3_0_0_chr19_60524696_r,Cacul1_NM_030197_utr3_0_0_chr19_60524696_r	5	-	4351	9	1	0.00402927	0.00168
chr19	60528076	60528077	Cacul1_NM_001172096_utr3_0_0_chr19_60524696_r,Cacul1_NM_001172097_utr3_0_0_chr19_60524696_r,Cacul1_NM_030197_utr3_0_0_chr19_60524696_r	5	-	4351	5	1	0.00402927	0.00168
chr19	60528556	60528557	Cacul1_NM_001172096_utr3_0_0_chr19_60524696_r,Cacul1_NM_001172097_utr3_0_0_chr19_60524696_r,Cacul1_NM_030197_utr3_0_0_chr19_60524696_r	7	-	4351	8	1	0.00402927	0.000691
chr19	60528683	60528684	Cacul1_NM_001172096_utr3_0_0_chr19_60524696_r,Cacul1_NM_001172097_utr3_0_0_chr19_60524696_r,Cacul1_NM_030197_utr3_0_0_chr19_60524696_r	6	-	4351	6	1	0.00402927	0.000978
chr19	60528701	60528703	Cacul1_NM_001172096_utr3_0_0_chr19_60524696_r,Cacul1_NM_001172097_utr3_0_0_chr19_60524696_r,Cacul1_NM_030197_utr3_0_0_chr19_60524696_r	10	-	4351	19	2	0.00402927	0.000172
chr19	60528711	60528712	Cacul1_NM_001172096_utr3_0_0_chr19_60524696_r,Cacul1_NM_001172097_utr3_0_0_chr19_60524696_r,Cacul1_NM_030197_utr3_0_0_chr19_60524696_r	6	-	4351	6	1	0.00402927	0.00168
chr1	160203079	160203080	Cacybp_NM_009786_utr3_0_0_chr1_160202367_r	6	-	1200	6	1	0.191275	0.000475
chr1	160203214	160203215	Cacybp_NM_009786_utr3_0_0_chr1_160202367_r	14	-	1200	20	1	0.191275	1.48e-05
chr1	160203223	160203227	Cacybp_NM_009786_utr3_0_0_chr1_160202367_r	78	-	1200	99	4	0.191275	1.91e-07
chr1	160203341	160203342	Cacybp_NM_009786_utr3_0_0_chr1_160202367_r	7	-	1200	7	1	0.191275	0.000349
chr1	160203361	160203362	Cacybp_NM_009786_utr3_0_0_chr1_160202367_r	18	-	1200	18	1	0.191275	6.91e-05
chr1	160203365	160203366	Cacybp_NM_009786_utr3_0_0_chr1_160202367_r	19	-	1200	19	1	0.191275	2.53e-05
chr1	160203367	160203368	Cacybp_NM_009786_utr3_0_0_chr1_160202367_r	4	-	1200	4	1	0.191275	0.000813
chr1	160203465	160203467	Cacybp_NM_009786_utr3_0_0_chr1_160202367_r	8	-	1200	16	2	0.191275	7.04e-05
chr1	160203483	160203485	Cacybp_NM_009786_utr3_0_0_chr1_160202367_r	68	-	1200	98	2	0.191275	1.33e-15
chr1	160203486	160203489	Cacybp_NM_009786_utr3_0_0_chr1_160202367_r	49	-	1200	98	3	0.191275	0.000109
chr1	160203514	160203515	Cacybp_NM_009786_utr3_0_0_chr1_160202367_r	4	-	1200	4	1	0.191275	0.000813
chr5	31078442	31078443	Cad_NM_001289522_utr3_42_0_chr5_31078196_f,Cad_NM_001289523_utr3_43_0_chr5_31078196_f,Cad_NM_023525_utr3_43_0_chr5_31078196_f	5	+	284	5	1	0.128591	0.00141
chr9	47850665	47850666	Cadm1_NM_001025600_utr3_8_0_chr9_47850391_f,Cadm1_NM_001310841_utr3_11_0_chr9_47850391_f,Cadm1_NM_018770_utr3_9_0_chr9_47850391_f,Cadm1_NM_207675_utr3_10_0_chr9_47850391_f,Cadm1_NM_207676_utr3_9_0_chr9_47850391_f	13	+	3001	17	1	0	0.00221
chr9	47850671	47850672	Cadm1_NM_001025600_utr3_8_0_chr9_47850391_f,Cadm1_NM_001310841_utr3_11_0_chr9_47850391_f,Cadm1_NM_018770_utr3_9_0_chr9_47850391_f,Cadm1_NM_207675_utr3_10_0_chr9_47850391_f,Cadm1_NM_207676_utr3_9_0_chr9_47850391_f	25	+	3001	25	1	0	0.0065
chr9	47850715	47850716	Cadm1_NM_001025600_utr3_8_0_chr9_47850391_f,Cadm1_NM_001310841_utr3_11_0_chr9_47850391_f,Cadm1_NM_018770_utr3_9_0_chr9_47850391_f,Cadm1_NM_207675_utr3_10_0_chr9_47850391_f,Cadm1_NM_207676_utr3_9_0_chr9_47850391_f	14	+	3001	14	1	0	0.00326
chr9	47850836	47850839	Cadm1_NM_001025600_utr3_8_0_chr9_47850391_f,Cadm1_NM_001310841_utr3_11_0_chr9_47850391_f,Cadm1_NM_018770_utr3_9_0_chr9_47850391_f,Cadm1_NM_207675_utr3_10_0_chr9_47850391_f,Cadm1_NM_207676_utr3_9_0_chr9_47850391_f	18	+	3001	44	3	0	0.00941
chr9	47850933	47850935	Cadm1_NM_001025600_utr3_8_0_chr9_47850391_f,Cadm1_NM_001310841_utr3_11_0_chr9_47850391_f,Cadm1_NM_018770_utr3_9_0_chr9_47850391_f,Cadm1_NM_207675_utr3_10_0_chr9_47850391_f,Cadm1_NM_207676_utr3_9_0_chr9_47850391_f	16	+	3001	24	2	0	0.000763
chr9	47850965	47850966	Cadm1_NM_001025600_utr3_8_0_chr9_47850391_f,Cadm1_NM_001310841_utr3_11_0_chr9_47850391_f,Cadm1_NM_018770_utr3_9_0_chr9_47850391_f,Cadm1_NM_207675_utr3_10_0_chr9_47850391_f,Cadm1_NM_207676_utr3_9_0_chr9_47850391_f	10	+	3001	10	1	0	0.00688
chr9	47850972	47850973	Cadm1_NM_001025600_utr3_8_0_chr9_47850391_f,Cadm1_NM_001310841_utr3_11_0_chr9_47850391_f,Cadm1_NM_018770_utr3_9_0_chr9_47850391_f,Cadm1_NM_207675_utr3_10_0_chr9_47850391_f,Cadm1_NM_207676_utr3_9_0_chr9_47850391_f	19	+	3001	19	1	0	0.00934
chr9	47851614	47851615	Cadm1_NM_001025600_utr3_8_0_chr9_47850391_f,Cadm1_NM_001310841_utr3_11_0_chr9_47850391_f,Cadm1_NM_018770_utr3_9_0_chr9_47850391_f,Cadm1_NM_207675_utr3_10_0_chr9_47850391_f,Cadm1_NM_207676_utr3_9_0_chr9_47850391_f	7	+	3001	7	1	0	0.00941
chr9	47852805	47852806	Cadm1_NM_001025600_utr3_8_0_chr9_47850391_f,Cadm1_NM_001310841_utr3_11_0_chr9_47850391_f,Cadm1_NM_018770_utr3_9_0_chr9_47850391_f,Cadm1_NM_207675_utr3_10_0_chr9_47850391_f,Cadm1_NM_207676_utr3_9_0_chr9_47850391_f	15	+	3001	15	1	0	0.00157
chr9	47853068	47853069	Cadm1_NM_001025600_utr3_8_0_chr9_47850391_f,Cadm1_NM_001310841_utr3_11_0_chr9_47850391_f,Cadm1_NM_018770_utr3_9_0_chr9_47850391_f,Cadm1_NM_207675_utr3_10_0_chr9_47850391_f,Cadm1_NM_207676_utr3_9_0_chr9_47850391_f	7	+	3001	17	1	0	0.00939
chr9	47853213	47853215	Cadm1_NM_001025600_utr3_8_0_chr9_47850391_f,Cadm1_NM_001310841_utr3_11_0_chr9_47850391_f,Cadm1_NM_018770_utr3_9_0_chr9_47850391_f,Cadm1_NM_207675_utr3_10_0_chr9_47850391_f,Cadm1_NM_207676_utr3_9_0_chr9_47850391_f	22	+	3001	29	2	0	0.000462
chr9	47853238	47853239	Cadm1_NM_001025600_utr3_8_0_chr9_47850391_f,Cadm1_NM_001310841_utr3_11_0_chr9_47850391_f,Cadm1_NM_018770_utr3_9_0_chr9_47850391_f,Cadm1_NM_207675_utr3_10_0_chr9_47850391_f,Cadm1_NM_207676_utr3_9_0_chr9_47850391_f	10	+	3001	10	1	0	0.00546
chr9	47853307	47853308	Cadm1_NM_001025600_utr3_8_0_chr9_47850391_f,Cadm1_NM_001310841_utr3_11_0_chr9_47850391_f,Cadm1_NM_018770_utr3_9_0_chr9_47850391_f,Cadm1_NM_207675_utr3_10_0_chr9_47850391_f,Cadm1_NM_207676_utr3_9_0_chr9_47850391_f	21	+	3001	21	1	0	0.00215
chr12	100206847	100206848	Calm1_NM_001313934_utr3_5_0_chr12_100206429_f,Calm1_NM_009790_utr3_5_0_chr12_100206429_f	10	+	3396	10	1	0.0107538	0.00273
chr12	100207226	100207227	Calm1_NM_001313934_utr3_5_0_chr12_100206429_f,Calm1_NM_009790_utr3_5_0_chr12_100206429_f	10	+	3396	10	1	0.0107538	0.000484
chr17	87433447	87433448	Calm2_NM_001355703_utr3_0_0_chr17_87433401_r,Calm2_NM_007589_utr3_0_0_chr17_87433401_r	35	-	626	35	1	0	0.00881
chr17	87433956	87433958	Calm2_NM_001355703_utr3_0_0_chr17_87433401_r,Calm2_NM_007589_utr3_0_0_chr17_87433401_r	33	-	626	55	2	0	0.00403
chr17	87433965	87433966	Calm2_NM_001355703_utr3_0_0_chr17_87433401_r,Calm2_NM_007589_utr3_0_0_chr17_87433401_r	28	-	626	45	1	0	0.00924
chr7	16915434	16915435	Calm3_NM_007590_utr3_0_0_chr7_16915379_r	6	-	1569	6	1	0.0222958	0.000875
chr8	84842453	84842454	Calr_NM_007591_utr3_0_0_chr8_84842088_r	8	-	559	8	1	0.0478944	0.000469
chr6	29374548	29374549	Calu_NM_001285412_utr3_6_0_chr6_29374504_f,Calu_NM_007594_utr3_6_0_chr6_29374504_f,Calu_NM_184053_utr3_6_0_chr6_29374504_f	6	+	2172	6	1	0.016814	0.00105
chr6	29374765	29374766	Calu_NM_001285412_utr3_6_0_chr6_29374504_f,Calu_NM_007594_utr3_6_0_chr6_29374504_f,Calu_NM_184053_utr3_6_0_chr6_29374504_f	5	+	2172	5	1	0.016814	0.00197
chr6	29374843	29374844	Calu_NM_001285412_utr3_6_0_chr6_29374504_f,Calu_NM_007594_utr3_6_0_chr6_29374504_f,Calu_NM_184053_utr3_6_0_chr6_29374504_f	8	+	2172	9	1	0.016814	0.00197
chr6	29374874	29374875	Calu_NM_001285412_utr3_6_0_chr6_29374504_f,Calu_NM_007594_utr3_6_0_chr6_29374504_f,Calu_NM_184053_utr3_6_0_chr6_29374504_f	10	+	2172	14	1	0.016814	0.00219
chr6	29375149	29375150	Calu_NM_001285412_utr3_6_0_chr6_29374504_f,Calu_NM_007594_utr3_6_0_chr6_29374504_f,Calu_NM_184053_utr3_6_0_chr6_29374504_f	7	+	2172	13	1	0.016814	0.000665
chr6	29375157	29375158	Calu_NM_001285412_utr3_6_0_chr6_29374504_f,Calu_NM_007594_utr3_6_0_chr6_29374504_f,Calu_NM_184053_utr3_6_0_chr6_29374504_f	5	+	2172	5	1	0.016814	0.00278
chr6	29375397	29375398	Calu_NM_001285412_utr3_6_0_chr6_29374504_f,Calu_NM_007594_utr3_6_0_chr6_29374504_f,Calu_NM_184053_utr3_6_0_chr6_29374504_f	7	+	2172	7	1	0.016814	0.0015
chr6	29376490	29376491	Calu_NM_001285412_utr3_6_0_chr6_29374504_f,Calu_NM_007594_utr3_6_0_chr6_29374504_f,Calu_NM_184053_utr3_6_0_chr6_29374504_f	12	+	2172	12	1	0.016814	0.000348
chr14	20734920	20734921	Camk2g_NM_001039138_utr3_0_0_chr14_20734873_r,Camk2g_NM_001039139_utr3_0_0_chr14_20734873_r,Camk2g_NM_178597_utr3_0_0_chr14_20734873_r	19	-	1980	19	1	0	0.000145
chr5	122731310	122731311	Camkk2_NM_001199676_utr3_0_0_chr5_122731170_r,Camkk2_NM_145358_utr3_0_0_chr5_122731170_r	4	-	3003	4	1	0	0.00293
chr5	122733725	122733726	Camkk2_NM_001199676_utr3_0_0_chr5_122731170_r,Camkk2_NM_145358_utr3_0_0_chr5_122731170_r	7	-	3003	12	1	0	0.00157
chr5	122733859	122733860	Camkk2_NM_001199676_utr3_0_0_chr5_122731170_r,Camkk2_NM_145358_utr3_0_0_chr5_122731170_r	6	-	3003	6	1	0	0.00228
chr5	122733877	122733878	Camkk2_NM_001199676_utr3_0_0_chr5_122731170_r,Camkk2_NM_145358_utr3_0_0_chr5_122731170_r	7	-	3003	9	1	0	0.000488
chr2	25929207	25929208	Camsap1_NM_001276359_utr3_0_0_chr2_25926838_r,Camsap1_NM_001276360_utr3_0_0_chr2_25926838_r,Camsap1_NM_001276361_utr3_0_0_chr2_25926838_r	6	-	2888	6	1	0	0.000395
chr1	136269341	136269342	Camsap2_NM_001081360_utr3_0_0_chr1_136268123_r,Camsap2_NM_001347109_utr3_0_0_chr1_136268123_r,Camsap2_NM_001347110_utr3_0_0_chr1_136268123_r	5	-	2719	5	1	0	0.00169
chr1	136270363	136270364	Camsap2_NM_001081360_utr3_0_0_chr1_136268123_r,Camsap2_NM_001347109_utr3_0_0_chr1_136268123_r,Camsap2_NM_001347110_utr3_0_0_chr1_136268123_r	4	-	2719	4	1	0	0.00169
chr10	119202683	119202685	Cand1_NM_027994_utr3_0_0_chr10_119198812_r	8	-	4169	10	2	0	0.000763
chr10	119202763	119202764	Cand1_NM_027994_utr3_0_0_chr10_119198812_r	16	-	4169	16	1	0	0.000188
chr10	119202827	119202828	Cand1_NM_027994_utr3_0_0_chr10_119198812_r	5	-	4169	15	1	0	0.00128
chr10	119202879	119202880	Cand1_NM_027994_utr3_0_0_chr10_119198812_r	6	-	4169	6	1	0	0.00294
chr6	115805535	115805536	Cand2_NM_025958_utr3_14_0_chr6_115803865_f	9	+	1691	27	1	0	0.00103
chr6	115805542	115805543	Cand2_NM_025958_utr3_14_0_chr6_115803865_f	16	+	1691	16	1	0	0.00132
chr11	50294548	50294549	Canx_NM_001110499_utr3_0_0_chr11_50293957_r,Canx_NM_001110500_utr3_0_0_chr11_50293957_r,Canx_NM_007597_utr3_0_0_chr11_50293957_r	17	-	2325	18	1	0.0265613	0.000188
chr11	50294875	50294876	Canx_NM_001110499_utr3_0_0_chr11_50293957_r,Canx_NM_001110500_utr3_0_0_chr11_50293957_r,Canx_NM_007597_utr3_0_0_chr11_50293957_r	9	-	2325	9	1	0.0265613	0.00128
chr11	50294880	50294881	Canx_NM_001110499_utr3_0_0_chr11_50293957_r,Canx_NM_001110500_utr3_0_0_chr11_50293957_r,Canx_NM_007597_utr3_0_0_chr11_50293957_r	4	-	2325	4	1	0.0265613	0.00128
chr11	50295011	50295012	Canx_NM_001110499_utr3_0_0_chr11_50293957_r,Canx_NM_001110500_utr3_0_0_chr11_50293957_r,Canx_NM_007597_utr3_0_0_chr11_50293957_r	38	-	2325	38	1	0.0265613	0.000149
chr11	50295112	50295113	Canx_NM_001110499_utr3_0_0_chr11_50293957_r,Canx_NM_001110500_utr3_0_0_chr11_50293957_r,Canx_NM_007597_utr3_0_0_chr11_50293957_r	5	-	2325	5	1	0.0265613	0.00139
chr11	50295222	50295223	Canx_NM_001110499_utr3_0_0_chr11_50293957_r,Canx_NM_001110500_utr3_0_0_chr11_50293957_r,Canx_NM_007597_utr3_0_0_chr11_50293957_r	9	-	2325	11	1	0.0265613	0.0008
chr11	50295393	50295394	Canx_NM_001110499_utr3_0_0_chr11_50293957_r,Canx_NM_001110500_utr3_0_0_chr11_50293957_r,Canx_NM_007597_utr3_0_0_chr11_50293957_r	6	-	2325	6	1	0.0265613	0.00128
chr11	50295668	50295671	Canx_NM_001110499_utr3_0_0_chr11_50293957_r,Canx_NM_001110500_utr3_0_0_chr11_50293957_r,Canx_NM_007597_utr3_0_0_chr11_50293957_r	8	-	2325	18	3	0.0265613	0.000817
chr11	50295715	50295716	Canx_NM_001110499_utr3_0_0_chr11_50293957_r,Canx_NM_001110500_utr3_0_0_chr11_50293957_r,Canx_NM_007597_utr3_0_0_chr11_50293957_r	8	-	2325	13	1	0.0265613	0.00139
chr11	50295733	50295735	Canx_NM_001110499_utr3_0_0_chr11_50293957_r,Canx_NM_001110500_utr3_0_0_chr11_50293957_r,Canx_NM_007597_utr3_0_0_chr11_50293957_r	16	-	2325	16	2	0.0265613	0.000241
chr11	50295745	50295746	Canx_NM_001110499_utr3_0_0_chr11_50293957_r,Canx_NM_001110500_utr3_0_0_chr11_50293957_r,Canx_NM_007597_utr3_0_0_chr11_50293957_r	25	-	2325	30	1	0.0265613	0.000335
chr11	50295767	50295768	Canx_NM_001110499_utr3_0_0_chr11_50293957_r,Canx_NM_001110500_utr3_0_0_chr11_50293957_r,Canx_NM_007597_utr3_0_0_chr11_50293957_r	15	-	2325	15	1	0.0265613	0.000513
chr11	50295808	50295809	Canx_NM_001110499_utr3_0_0_chr11_50293957_r,Canx_NM_001110500_utr3_0_0_chr11_50293957_r,Canx_NM_007597_utr3_0_0_chr11_50293957_r	5	-	2325	10	1	0.0265613	0.00128
chr11	50295812	50295813	Canx_NM_001110499_utr3_0_0_chr11_50293957_r,Canx_NM_001110500_utr3_0_0_chr11_50293957_r,Canx_NM_007597_utr3_0_0_chr11_50293957_r	6	-	2325	6	1	0.0265613	0.000513
chr11	50295831	50295832	Canx_NM_001110499_utr3_0_0_chr11_50293957_r,Canx_NM_001110500_utr3_0_0_chr11_50293957_r,Canx_NM_007597_utr3_0_0_chr11_50293957_r	11	-	2325	11	1	0.0265613	0.000513
chr11	50295887	50295888	Canx_NM_001110499_utr3_0_0_chr11_50293957_r,Canx_NM_001110500_utr3_0_0_chr11_50293957_r,Canx_NM_007597_utr3_0_0_chr11_50293957_r	17	-	2325	17	1	0.0265613	6.91e-05
chr11	50295895	50295896	Canx_NM_001110499_utr3_0_0_chr11_50293957_r,Canx_NM_001110500_utr3_0_0_chr11_50293957_r,Canx_NM_007597_utr3_0_0_chr11_50293957_r	6	-	2325	6	1	0.0265613	0.000817
chr11	50295903	50295904	Canx_NM_001110499_utr3_0_0_chr11_50293957_r,Canx_NM_001110500_utr3_0_0_chr11_50293957_r,Canx_NM_007597_utr3_0_0_chr11_50293957_r	7	-	2325	7	1	0.0265613	0.0008
chr11	50295931	50295932	Canx_NM_001110499_utr3_0_0_chr11_50293957_r,Canx_NM_001110500_utr3_0_0_chr11_50293957_r,Canx_NM_007597_utr3_0_0_chr11_50293957_r	11	-	2325	12	1	0.0265613	0.00128
chr11	50295951	50295952	Canx_NM_001110499_utr3_0_0_chr11_50293957_r,Canx_NM_001110500_utr3_0_0_chr11_50293957_r,Canx_NM_007597_utr3_0_0_chr11_50293957_r	7	-	2325	7	1	0.0265613	0.000817
chr14	31371554	31371555	Capn7_NM_009796_utr3_20_0_chr14_31371023_f	5	+	961	5	1	0	0.00559
chr14	31371797	31371798	Capn7_NM_009796_utr3_20_0_chr14_31371023_f	9	+	961	9	1	0	0.00382
chr14	31371800	31371801	Capn7_NM_009796_utr3_20_0_chr14_31371023_f	5	+	961	5	1	0	0.00649
chr14	31371840	31371841	Capn7_NM_009796_utr3_20_0_chr14_31371023_f	5	+	961	5	1	0	0.00649
chr2	103765519	103765520	Caprin1_NM_001111289_utr3_0_0_chr2_103762945_r,Caprin1_NM_001111290_utr3_0_0_chr2_103762945_r,Caprin1_NM_016739_utr3_0_0_chr2_103762945_r	10	-	3854	15	1	0.0459409	0.0003
chr2	103765528	103765529	Caprin1_NM_001111289_utr3_0_0_chr2_103762945_r,Caprin1_NM_001111290_utr3_0_0_chr2_103762945_r,Caprin1_NM_016739_utr3_0_0_chr2_103762945_r	9	-	3854	9	1	0.0459409	0.000455
chr2	103765542	103765543	Caprin1_NM_001111289_utr3_0_0_chr2_103762945_r,Caprin1_NM_001111290_utr3_0_0_chr2_103762945_r,Caprin1_NM_016739_utr3_0_0_chr2_103762945_r	5	-	3854	5	1	0.0459409	0.000757
chr2	103766711	103766712	Caprin1_NM_001111289_utr3_0_0_chr2_103762945_r,Caprin1_NM_001111290_utr3_0_0_chr2_103762945_r,Caprin1_NM_016739_utr3_0_0_chr2_103762945_r	8	-	3854	8	1	0.0459409	0.000831
chr2	103766724	103766726	Caprin1_NM_001111289_utr3_0_0_chr2_103762945_r,Caprin1_NM_001111290_utr3_0_0_chr2_103762945_r,Caprin1_NM_016739_utr3_0_0_chr2_103762945_r	11	-	3854	19	2	0.0459409	0.000455
chr2	103766736	103766737	Caprin1_NM_001111289_utr3_0_0_chr2_103762945_r,Caprin1_NM_001111290_utr3_0_0_chr2_103762945_r,Caprin1_NM_016739_utr3_0_0_chr2_103762945_r	11	-	3854	11	1	0.0459409	0.000296
chr2	103767370	103767371	Caprin1_NM_001111291_utr3_0_0_chr2_103767107_r,Caprin1_NM_001111292_utr3_0_0_chr2_103767107_r	9	-	1279	9	1	0	0.000565
chr6	17665608	17665609	Capza2_NM_007604_utr3_9_0_chr6_17665436_f	10	+	1101	10	1	0	0.00694
chr6	17665991	17665992	Capza2_NM_007604_utr3_9_0_chr6_17665436_f	43	+	1101	43	1	0	0.000337
chr6	17666047	17666048	Capza2_NM_007604_utr3_9_0_chr6_17665436_f	6	+	1101	6	1	0	0.00898
chr6	17666075	17666076	Capza2_NM_007604_utr3_9_0_chr6_17665436_f	8	+	1101	8	1	0	0.00923
chr11	98832607	98832608	Casc3_NM_138660_utr3_13_0_chr11_98832261_f	9	+	1547	9	1	0	0.0093
chr11	98832653	98832654	Casc3_NM_138660_utr3_13_0_chr11_98832261_f	19	+	1547	20	1	0	0.00113
chr11	98832666	98832667	Casc3_NM_138660_utr3_13_0_chr11_98832261_f	15	+	1547	15	1	0	0.00339
chr11	98832735	98832737	Casc3_NM_138660_utr3_13_0_chr11_98832261_f	11	+	1547	14	2	0	0.0093
chr11	98833225	98833226	Casc3_NM_138660_utr3_13_0_chr11_98832261_f	19	+	1547	19	1	0	0.00614
chr2	121933640	121933641	Casc4_NM_001205369_utr3_9_0_chr2_121933549_f,Casc4_NM_001205370_utr3_8_0_chr2_121933549_f,Casc4_NM_001205371_utr3_9_0_chr2_121933549_f,Casc4_NM_177054_utr3_8_0_chr2_121933549_f,Casc4_NM_199038_utr3_7_0_chr2_121933549_f	4	+	2659	4	1	0.0137345	0.00212
chr2	121934235	121934236	Casc4_NM_001205369_utr3_9_0_chr2_121933549_f,Casc4_NM_001205370_utr3_8_0_chr2_121933549_f,Casc4_NM_001205371_utr3_9_0_chr2_121933549_f,Casc4_NM_177054_utr3_8_0_chr2_121933549_f,Casc4_NM_199038_utr3_7_0_chr2_121933549_f	9	+	2659	9	1	0.0137345	0.00103
chr2	121934722	121934723	Casc4_NM_001205369_utr3_9_0_chr2_121933549_f,Casc4_NM_001205370_utr3_8_0_chr2_121933549_f,Casc4_NM_001205371_utr3_9_0_chr2_121933549_f,Casc4_NM_177054_utr3_8_0_chr2_121933549_f,Casc4_NM_199038_utr3_7_0_chr2_121933549_f	4	+	2659	4	1	0.0137345	0.00269
chr2	121934753	121934754	Casc4_NM_001205369_utr3_9_0_chr2_121933549_f,Casc4_NM_001205370_utr3_8_0_chr2_121933549_f,Casc4_NM_001205371_utr3_9_0_chr2_121933549_f,Casc4_NM_177054_utr3_8_0_chr2_121933549_f,Casc4_NM_199038_utr3_7_0_chr2_121933549_f	5	+	2659	5	1	0.0137345	0.00146
chr2	121935801	121935802	Casc4_NM_001205369_utr3_9_0_chr2_121933549_f,Casc4_NM_001205370_utr3_8_0_chr2_121933549_f,Casc4_NM_001205371_utr3_9_0_chr2_121933549_f,Casc4_NM_177054_utr3_8_0_chr2_121933549_f,Casc4_NM_199038_utr3_7_0_chr2_121933549_f	18	+	2659	18	1	0.0137345	0.000446
chr6	42280782	42280783	Casp2_NM_007610_utr3_10_0_chr6_42280478_f	9	+	2031	9	1	0	0.00651
chr6	42280856	42280857	Casp2_NM_007610_utr3_10_0_chr6_42280478_f	13	+	2031	17	1	0	0.00157
chr6	42281882	42281883	Casp2_NM_007610_utr3_10_0_chr6_42280478_f	10	+	2031	10	1	0	0.00531
chr6	42282001	42282002	Casp2_NM_007610_utr3_10_0_chr6_42280478_f	8	+	2031	8	1	0	0.00651
chr6	42282189	42282190	Casp2_NM_007610_utr3_10_0_chr6_42280478_f	19	+	2031	19	1	0	0.000945
chr6	42282251	42282252	Casp2_NM_007610_utr3_10_0_chr6_42280478_f	11	+	2031	25	1	0	0.00531
chr6	42282253	42282254	Casp2_NM_007610_utr3_10_0_chr6_42280478_f	11	+	2031	25	1	0	0.00478
chr6	42282255	42282256	Casp2_NM_007610_utr3_10_0_chr6_42280478_f	16	+	2031	37	1	0	0.00754
chr6	42282257	42282258	Casp2_NM_007610_utr3_10_0_chr6_42280478_f	16	+	2031	37	1	0	0.00894
chr6	42282263	42282264	Casp2_NM_007610_utr3_10_0_chr6_42280478_f	20	+	2031	23	1	0	0.00157
chr6	42282318	42282319	Casp2_NM_007610_utr3_10_0_chr6_42280478_f	13	+	2031	13	1	0	0.00531
chr6	42282354	42282355	Casp2_NM_007610_utr3_10_0_chr6_42280478_f	14	+	2031	20	1	0	0.00379
chr19	56441201	56441202	Casp7_NM_007611_utr3_6_0_chr19_56441096_f	19	+	1248	24	1	0	0.000435
chr19	56441232	56441233	Casp7_NM_007611_utr3_6_0_chr19_56441096_f	10	+	1248	17	1	0	0.00591
chr19	56441244	56441245	Casp7_NM_007611_utr3_6_0_chr19_56441096_f	8	+	1248	8	1	0	0.00611
chr19	56442144	56442145	Casp7_NM_007611_utr3_6_0_chr19_56441096_f	11	+	1248	11	1	0	0.00422
chr19	56442267	56442268	Casp7_NM_007611_utr3_6_0_chr19_56441096_f	10	+	1248	19	1	0	0.00425
chr4	141813670	141813671	Casp9_NM_001277932_utr3_7_0_chr4_141813651_f	5	+	2328	5	1	0.992147	0.000526
chr4	141815851	141815852	Casp9_NM_001277932_utr3_7_0_chr4_141813651_f,Casp9_NM_001355176_utr3_8_0_chr4_141813688_f,Casp9_NM_015733_utr3_8_0_chr4_141813688_f	7	+	2328	7	1	1.00817	0.00018
chr8	105216186	105216187	Cbfb_NM_001161456_utr3_4_0_chr8_105215973_f,Cbfb_NM_001161457_utr3_4_0_chr8_105215973_f,Cbfb_NM_001161458_utr3_5_0_chr8_105215927_f,Cbfb_NM_022309_utr3_5_0_chr8_105215973_f	11	+	2062	11	1	0.0266468	0.00199
chr8	105216217	105216218	Cbfb_NM_001161456_utr3_4_0_chr8_105215973_f,Cbfb_NM_001161457_utr3_4_0_chr8_105215973_f,Cbfb_NM_001161458_utr3_5_0_chr8_105215927_f,Cbfb_NM_022309_utr3_5_0_chr8_105215973_f	9	+	2062	16	1	0.0266468	0.000535
chr8	105216222	105216223	Cbfb_NM_001161456_utr3_4_0_chr8_105215973_f,Cbfb_NM_001161457_utr3_4_0_chr8_105215973_f,Cbfb_NM_001161458_utr3_5_0_chr8_105215927_f,Cbfb_NM_022309_utr3_5_0_chr8_105215973_f	6	+	2062	6	1	0.0266468	0.00222
chr8	105216331	105216332	Cbfb_NM_001161456_utr3_4_0_chr8_105215973_f,Cbfb_NM_001161457_utr3_4_0_chr8_105215973_f,Cbfb_NM_001161458_utr3_5_0_chr8_105215927_f,Cbfb_NM_022309_utr3_5_0_chr8_105215973_f	7	+	2062	12	1	0.0266468	0.001
chr8	105216346	105216347	Cbfb_NM_001161456_utr3_4_0_chr8_105215973_f,Cbfb_NM_001161457_utr3_4_0_chr8_105215973_f,Cbfb_NM_001161458_utr3_5_0_chr8_105215927_f,Cbfb_NM_022309_utr3_5_0_chr8_105215973_f	8	+	2062	8	1	0.0266468	0.00152
chr8	105216373	105216374	Cbfb_NM_001161456_utr3_4_0_chr8_105215973_f,Cbfb_NM_001161457_utr3_4_0_chr8_105215973_f,Cbfb_NM_001161458_utr3_5_0_chr8_105215927_f,Cbfb_NM_022309_utr3_5_0_chr8_105215973_f	9	+	2062	9	1	0.0266468	0.00152
chr8	105216405	105216406	Cbfb_NM_001161456_utr3_4_0_chr8_105215973_f,Cbfb_NM_001161457_utr3_4_0_chr8_105215973_f,Cbfb_NM_001161458_utr3_5_0_chr8_105215927_f,Cbfb_NM_022309_utr3_5_0_chr8_105215973_f	30	+	2062	30	1	0.0266468	0.00102
chr8	105216411	105216414	Cbfb_NM_001161456_utr3_4_0_chr8_105215973_f,Cbfb_NM_001161457_utr3_4_0_chr8_105215973_f,Cbfb_NM_001161458_utr3_5_0_chr8_105215927_f,Cbfb_NM_022309_utr3_5_0_chr8_105215973_f	14	+	2062	36	3	0.0266468	0.000127
chr8	105216419	105216420	Cbfb_NM_001161456_utr3_4_0_chr8_105215973_f,Cbfb_NM_001161457_utr3_4_0_chr8_105215973_f,Cbfb_NM_001161458_utr3_5_0_chr8_105215927_f,Cbfb_NM_022309_utr3_5_0_chr8_105215973_f	8	+	2062	8	1	0.0266468	0.000978
chr8	105216430	105216431	Cbfb_NM_001161456_utr3_4_0_chr8_105215973_f,Cbfb_NM_001161457_utr3_4_0_chr8_105215973_f,Cbfb_NM_001161458_utr3_5_0_chr8_105215927_f,Cbfb_NM_022309_utr3_5_0_chr8_105215973_f	7	+	2062	13	1	0.0266468	0.00152
chr8	105216459	105216460	Cbfb_NM_001161456_utr3_4_0_chr8_105215973_f,Cbfb_NM_001161457_utr3_4_0_chr8_105215973_f,Cbfb_NM_001161458_utr3_5_0_chr8_105215927_f,Cbfb_NM_022309_utr3_5_0_chr8_105215973_f	6	+	2062	6	1	0.0266468	0.00145
chr8	105216842	105216845	Cbfb_NM_001161456_utr3_4_0_chr8_105215973_f,Cbfb_NM_001161457_utr3_4_0_chr8_105215973_f,Cbfb_NM_001161458_utr3_5_0_chr8_105215927_f,Cbfb_NM_022309_utr3_5_0_chr8_105215973_f	19	+	2062	34	3	0.0266468	0.000513
chr8	105216858	105216859	Cbfb_NM_001161456_utr3_4_0_chr8_105215973_f,Cbfb_NM_001161457_utr3_4_0_chr8_105215973_f,Cbfb_NM_001161458_utr3_5_0_chr8_105215927_f,Cbfb_NM_022309_utr3_5_0_chr8_105215973_f	14	+	2062	18	1	0.0266468	0.00152
chr8	105216869	105216870	Cbfb_NM_001161456_utr3_4_0_chr8_105215973_f,Cbfb_NM_001161457_utr3_4_0_chr8_105215973_f,Cbfb_NM_001161458_utr3_5_0_chr8_105215927_f,Cbfb_NM_022309_utr3_5_0_chr8_105215973_f	4	+	2062	4	1	0.0266468	0.00292
chr8	105216936	105216937	Cbfb_NM_001161456_utr3_4_0_chr8_105215973_f,Cbfb_NM_001161457_utr3_4_0_chr8_105215973_f,Cbfb_NM_001161458_utr3_5_0_chr8_105215927_f,Cbfb_NM_022309_utr3_5_0_chr8_105215973_f	16	+	2062	16	1	0.0266468	0.000124
chr8	105217005	105217006	Cbfb_NM_001161456_utr3_4_0_chr8_105215973_f,Cbfb_NM_001161457_utr3_4_0_chr8_105215973_f,Cbfb_NM_001161458_utr3_5_0_chr8_105215927_f,Cbfb_NM_022309_utr3_5_0_chr8_105215973_f	6	+	2062	10	1	0.0266468	0.00108
chr8	105217009	105217010	Cbfb_NM_001161456_utr3_4_0_chr8_105215973_f,Cbfb_NM_001161457_utr3_4_0_chr8_105215973_f,Cbfb_NM_001161458_utr3_5_0_chr8_105215927_f,Cbfb_NM_022309_utr3_5_0_chr8_105215973_f	10	+	2062	16	1	0.0266468	0.001
chr8	105217172	105217173	Cbfb_NM_001161456_utr3_4_0_chr8_105215973_f,Cbfb_NM_001161457_utr3_4_0_chr8_105215973_f,Cbfb_NM_001161458_utr3_5_0_chr8_105215927_f,Cbfb_NM_022309_utr3_5_0_chr8_105215973_f	7	+	2062	7	1	0.0266468	0.00102
chr8	105217236	105217237	Cbfb_NM_001161456_utr3_4_0_chr8_105215973_f,Cbfb_NM_001161457_utr3_4_0_chr8_105215973_f,Cbfb_NM_001161458_utr3_5_0_chr8_105215927_f,Cbfb_NM_022309_utr3_5_0_chr8_105215973_f	7	+	2062	7	1	0.0266468	0.000702
chr8	105217345	105217346	Cbfb_NM_001161456_utr3_4_0_chr8_105215973_f,Cbfb_NM_001161457_utr3_4_0_chr8_105215973_f,Cbfb_NM_001161458_utr3_5_0_chr8_105215927_f,Cbfb_NM_022309_utr3_5_0_chr8_105215973_f	8	+	2062	11	1	0.0266468	0.00199
chr9	44151104	44151105	Cbl_NM_007619_utr3_0_0_chr9_44149262_r	5	-	2183	5	1	0	0.0012
chr16	52204973	52204974	Cblb_NM_001033238_utr3_17_0_chr16_52204693_f	7	+	3354	12	1	0	0.00674
chr16	52204975	52204976	Cblb_NM_001033238_utr3_17_0_chr16_52204693_f	7	+	3354	7	1	0	0.00441
chr16	52204996	52204997	Cblb_NM_001033238_utr3_17_0_chr16_52204693_f	8	+	3354	11	1	0	0.00105
chr16	52205008	52205009	Cblb_NM_001033238_utr3_17_0_chr16_52204693_f	6	+	3354	16	1	0	0.00555
chr16	52205026	52205027	Cblb_NM_001033238_utr3_17_0_chr16_52204693_f	13	+	3354	13	1	0	0.00165
chr16	52205743	52205744	Cblb_NM_001033238_utr3_17_0_chr16_52204693_f	10	+	3354	13	1	0	0.00265
chr16	52206150	52206151	Cblb_NM_001033238_utr3_17_0_chr16_52204693_f	14	+	3354	14	1	0	0.000431
chr16	52207892	52207893	Cblb_NM_001033238_utr3_17_0_chr16_52204693_f	8	+	3354	8	1	0	0.00345
chr16	52207905	52207906	Cblb_NM_001033238_utr3_17_0_chr16_52204693_f	6	+	3354	11	1	0	0.00555
chr16	52208010	52208011	Cblb_NM_001033238_utr3_17_0_chr16_52204693_f	6	+	3354	6	1	0	0.00441
chr12	31486510	31486511	Cbll1_NM_001253847_utr3_0_0_chr12_31484829_r,Cbll1_NM_001253848_utr3_0_0_chr12_31484829_r,Cbll1_NM_134048_utr3_0_0_chr12_31484829_r	7	-	2450	7	1	0	0.00252
chr11	119030985	119030986	Cbx2_NM_007623_utr3_4_0_chr11_119029171_f	4	+	2105	4	1	0	0.00587
chr11	119031065	119031066	Cbx2_NM_007623_utr3_4_0_chr11_119029171_f	11	+	2105	11	1	0	0.000455
chr11	119031128	119031130	Cbx2_NM_007623_utr3_4_0_chr11_119029171_f	14	+	2105	21	2	0	0.00202
chr11	119031239	119031241	Cbx2_NM_007623_utr3_4_0_chr11_119029171_f	20	+	2105	25	2	0	0.000305
chr6	51482986	51482987	Cbx3_NM_001355002_utr3_5_0_chr6_51482607_f,Cbx3_NM_007624_utr3_5_0_chr6_51482607_f	17	+	1098	54	1	0	0.00151
chr6	51482988	51482992	Cbx3_NM_001355002_utr3_5_0_chr6_51482607_f,Cbx3_NM_007624_utr3_5_0_chr6_51482607_f	17	+	1098	54	4	0	0.00191
chr6	51482995	51482997	Cbx3_NM_001355002_utr3_5_0_chr6_51482607_f,Cbx3_NM_007624_utr3_5_0_chr6_51482607_f	42	+	1098	62	2	0	0.000198
chr11	119038479	119038480	Cbx8_NM_013926_utr3_0_0_chr11_119038436_r	14	-	241	14	1	0	0.0011
chr10	62744626	62744628	Ccar1_NM_026201_utr3_0_0_chr10_62743928_r	5	-	835	8	2	0	0.00254
chr10	62744645	62744646	Ccar1_NM_026201_utr3_0_0_chr10_62743928_r	4	-	835	4	1	0	0.00427
chr10	62744694	62744695	Ccar1_NM_026201_utr3_0_0_chr10_62743928_r	6	-	835	6	1	0	0.00365
chr18	46282795	46282796	Ccdc112_NM_001160399_utr3_0_0_chr18_46282151_r	9	-	1105	9	1	0	0.00797
chr18	46282816	46282817	Ccdc112_NM_001160399_utr3_0_0_chr18_46282151_r	10	-	1105	10	1	0	0.00561
chr18	46282855	46282856	Ccdc112_NM_001160399_utr3_0_0_chr18_46282151_r	8	-	1105	14	1	0	0.00537
chr18	46282867	46282868	Ccdc112_NM_001160399_utr3_0_0_chr18_46282151_r	8	-	1105	8	1	0	0.00506
chr18	46283036	46283037	Ccdc112_NM_001160399_utr3_0_0_chr18_46282151_r	11	-	1105	20	1	0	0.00797
chr18	46283047	46283048	Ccdc112_NM_001160399_utr3_0_0_chr18_46282151_r	17	-	1105	24	1	0	0.000303
chr18	46283120	46283121	Ccdc112_NM_001160399_utr3_0_0_chr18_46282151_r	9	-	1105	9	1	0	0.00362
chr11	5528917	5528918	Ccdc117_NM_134033_utr3_0_0_chr11_5528888_r	14	-	2408	14	1	0.106438	0.00146
chr11	5529132	5529133	Ccdc117_NM_134033_utr3_0_0_chr11_5528888_r	10	-	2408	10	1	0.106438	0.0008
chr11	5529981	5529982	Ccdc117_NM_134033_utr3_0_0_chr11_5528888_r	6	-	2408	6	1	0.106438	0.00146
chr11	5529987	5529989	Ccdc117_NM_134033_utr3_0_0_chr11_5528888_r	8	-	2408	15	2	0.106438	0.000162
chr9	110711482	110711483	Ccdc12_NM_028312_utr3_6_0_chr9_110711334_f	6	+	260	6	1	0	0.00122
chr13	74357344	74357345	Ccdc127_NM_001168659_utr3_2_0_chr13_74357118_f,Ccdc127_NM_024201_utr3_2_0_chr13_74357118_f	8	+	2551	8	1	0.0143159	0.00189
chr10	58576060	58576061	Ccdc138_NM_001162956_utr3_15_0_chr10_58575855_f	5	+	390	10	1	0	0.000609
chr12	72101405	72101406	Ccdc175_NM_028687_utr3_0_0_chr12_72101292_r	19	-	115	19	1	0	0.00311
chr14	65866156	65866157	Ccdc25_NM_145944_utr3_8_0_chr14_65865160_f	10	+	1445	15	1	0	0.000936
chr11	102685331	102685332	Ccdc43_NM_025918_utr3_0_0_chr11_102684688_r	7	-	1621	7	1	0.0330326	0.000848
chr10	70190816	70190817	Ccdc6_NM_001111121_utr3_8_0_chr10_70189279_f	26	+	3922	26	1	0	0.00847
chr10	70192159	70192160	Ccdc6_NM_001111121_utr3_8_0_chr10_70189279_f	35	+	3922	35	1	0	0.00658
chr10	70192242	70192243	Ccdc6_NM_001111121_utr3_8_0_chr10_70189279_f	31	+	3922	31	1	0	0.006
chr10	70192249	70192251	Ccdc6_NM_001111121_utr3_8_0_chr10_70189279_f	76	+	3922	147	2	0	0.000326
chr10	70192273	70192274	Ccdc6_NM_001111121_utr3_8_0_chr10_70189279_f	20	+	3922	31	1	0	0.00832
chr10	70192312	70192313	Ccdc6_NM_001111121_utr3_8_0_chr10_70189279_f	25	+	3922	25	1	0	0.00877
chr10	70192475	70192476	Ccdc6_NM_001111121_utr3_8_0_chr10_70189279_f	34	+	3922	34	1	0	0.00695
chr10	70192483	70192484	Ccdc6_NM_001111121_utr3_8_0_chr10_70189279_f	50	+	3922	50	1	0	0.00253
chr10	70192487	70192488	Ccdc6_NM_001111121_utr3_8_0_chr10_70189279_f	71	+	3922	87	1	0	0.00047
chr10	70192493	70192494	Ccdc6_NM_001111121_utr3_8_0_chr10_70189279_f	57	+	3922	78	1	0	0.00227
chr10	70192508	70192509	Ccdc6_NM_001111121_utr3_8_0_chr10_70189279_f	33	+	3922	33	1	0	0.00847
chr10	70192517	70192518	Ccdc6_NM_001111121_utr3_8_0_chr10_70189279_f	16	+	3922	24	1	0	0.00877
chr10	70192523	70192524	Ccdc6_NM_001111121_utr3_8_0_chr10_70189279_f	22	+	3922	22	1	0	0.00734
chr10	70193088	70193090	Ccdc6_NM_001111121_utr3_8_0_chr10_70189279_f	32	+	3922	64	2	0	0.00143
chr10	70193112	70193113	Ccdc6_NM_001111121_utr3_8_0_chr10_70189279_f	58	+	3922	58	1	0	0.00158
chr10	70193130	70193131	Ccdc6_NM_001111121_utr3_8_0_chr10_70189279_f	36	+	3922	36	1	0	0.0022
chr12	32380392	32380393	Ccdc71l_NM_001162903_utr3_0_0_chr12_32379641_f	5	+	3303	5	1	0	0.00124
chr2	104999698	104999699	Ccdc73_NM_177600_utr3_17_0_chr2_104999185_f	4	+	553	4	1	0	0.00157
chr4	21747805	21747806	Ccnc_NM_001122982_utr3_11_0_chr4_21747535_f	5	+	428	5	1	0	0.00104
chr7	144930323	144930325	Ccnd1_NM_007631_utr3_0_0_chr7_144929931_r	9	-	2676	14	2	0.283866	3.13e-05
chr7	144930432	144930433	Ccnd1_NM_007631_utr3_0_0_chr7_144929931_r	13	-	2676	13	1	0.283866	0.000454
chr7	144930712	144930713	Ccnd1_NM_007631_utr3_0_0_chr7_144929931_r	8	-	2676	12	1	0.283866	0.000413
chr7	144930728	144930729	Ccnd1_NM_007631_utr3_0_0_chr7_144929931_r	6	-	2676	11	1	0.283866	0.000488
chr7	144930735	144930736	Ccnd1_NM_007631_utr3_0_0_chr7_144929931_r	5	-	2676	5	1	0.283866	0.00108
chr7	144930741	144930742	Ccnd1_NM_007631_utr3_0_0_chr7_144929931_r	12	-	2676	12	1	0.283866	0.000413
chr7	144930761	144930762	Ccnd1_NM_007631_utr3_0_0_chr7_144929931_r	10	-	2676	10	1	0.283866	0.000413
chr7	144932237	144932238	Ccnd1_NM_007631_utr3_0_0_chr7_144929931_r	4	-	2676	4	1	0.283866	0.00108
chr7	144932280	144932281	Ccnd1_NM_007631_utr3_0_0_chr7_144929931_r	5	-	2676	5	1	0.283866	0.000658
chr7	144932462	144932463	Ccnd1_NM_007631_utr3_0_0_chr7_144929931_r	9	-	2676	9	1	0.283866	0.000171
chr7	144932469	144932471	Ccnd1_NM_007631_utr3_0_0_chr7_144929931_r	13	-	2676	20	2	0.283866	9.55e-05
chr6	127125798	127125799	Ccnd2_NM_009829_utr3_0_0_chr6_127125709_r	9	-	4626	9	1	0.00756208	0.000442
chr6	127128556	127128557	Ccnd2_NM_009829_utr3_0_0_chr6_127125709_r	6	-	4626	6	1	0.00756208	0.00172
chr6	127128764	127128765	Ccnd2_NM_009829_utr3_0_0_chr6_127125709_r	6	-	4626	11	1	0.00756208	0.00105
chr6	127128805	127128806	Ccnd2_NM_009829_utr3_0_0_chr6_127125709_r	8	-	4626	8	1	0.00756208	0.000464
chr6	127128938	127128939	Ccnd2_NM_009829_utr3_0_0_chr6_127125709_r	10	-	4626	10	1	0.00756208	0.001
chr6	127128963	127128964	Ccnd2_NM_009829_utr3_0_0_chr6_127125709_r	8	-	4626	8	1	0.00756208	0.00163
chr6	127129578	127129579	Ccnd2_NM_009829_utr3_0_0_chr6_127125709_r	8	-	4626	11	1	0.00756208	0.000366
chr6	127129602	127129603	Ccnd2_NM_009829_utr3_0_0_chr6_127125709_r	6	-	4626	6	1	0.00756208	0.000689
chr6	127129963	127129964	Ccnd2_NM_009829_utr3_0_0_chr6_127125709_r	5	-	4626	5	1	0.00756208	0.00104
chr6	127130114	127130115	Ccnd2_NM_009829_utr3_0_0_chr6_127125709_r	9	-	4626	9	1	0.00756208	0.00163
chr6	127130250	127130251	Ccnd2_NM_009829_utr3_0_0_chr6_127125709_r	8	-	4626	13	1	0.00756208	0.000143
chr6	127130260	127130261	Ccnd2_NM_009829_utr3_0_0_chr6_127125709_r	6	-	4626	6	1	0.00756208	0.000689
chr6	127130269	127130270	Ccnd2_NM_009829_utr3_0_0_chr6_127125709_r	15	-	4626	15	1	0.00756208	0.000689
chr11	40749237	40749238	Ccng1_NM_009831_utr3_0_0_chr11_40748552_r	4	-	2316	4	1	0.02312	0.00146
chr5	93182338	93182339	Ccni_NM_017367_utr3_0_0_chr5_93181933_r	10	-	1044	10	1	0	0.00841
chr5	93182680	93182681	Ccni_NM_017367_utr3_0_0_chr5_93181933_r	10	-	1044	12	1	0	0.00926
chr5	93182712	93182714	Ccni_NM_017367_utr3_0_0_chr5_93181933_r	6	-	1044	12	2	0	0.0025
chr5	93182724	93182725	Ccni_NM_017367_utr3_0_0_chr5_93181933_r	14	-	1044	14	1	0	0.00413
chr11	43586901	43586902	Ccnjl_NM_001045530_utr3_5_0_chr11_43585716_f	10	+	1284	16	1	0	0.00613
chr11	43586905	43586906	Ccnjl_NM_001045530_utr3_5_0_chr11_43585716_f	8	+	1284	8	1	0	0.0025
chr11	43586932	43586933	Ccnjl_NM_001045530_utr3_5_0_chr11_43585716_f	11	+	1284	11	1	0	0.0014
chr11	43586992	43586993	Ccnjl_NM_001045530_utr3_5_0_chr11_43585716_f	9	+	1284	19	1	0	0.000751
chr12	108203304	108203305	Ccnk_NM_009832_utr3_11_0_chr12_108202702_f	8	+	658	8	1	0.137143	0.000506
chr3	65946430	65946431	Ccnl1_NM_001355432_utr3_0_0_chr3_65946151_r,Ccnl1_NM_001355433_utr3_0_0_chr3_65946151_r,Ccnl1_NM_019937_utr3_0_0_chr3_65946151_r	7	-	449	8	1	0	0.00189
chr4	155824079	155824080	Ccnl2_NM_207678_utr3_10_0_chr4_155823698_f	8	+	846	9	1	0	0.000795
chr18	9314437	9314438	Ccny_NM_026484_utr3_0_0_chr18_9312304_r	16	-	4252	16	1	0	0.000589
chr18	9316020	9316021	Ccny_NM_026484_utr3_0_0_chr18_9312304_r	5	-	4252	5	1	0	0.0057
chr18	9316037	9316038	Ccny_NM_026484_utr3_0_0_chr18_9312304_r	4	-	4252	4	1	0	0.0057
chr18	9316447	9316450	Ccny_NM_026484_utr3_0_0_chr18_9312304_r	15	-	4252	45	3	0	0.00113
chr7	118735874	118735875	Ccp110_NM_182995_utr3_15_0_chr7_118735321_f	8	+	1698	12	1	0	0.00117
chr7	118736699	118736700	Ccp110_NM_182995_utr3_15_0_chr7_118735321_f	6	+	1698	6	1	0	0.0036
chr7	118736738	118736739	Ccp110_NM_182995_utr3_15_0_chr7_118735321_f	8	+	1698	8	1	0	0.0036
chr9	73013906	73013907	Ccpg1_NM_001114328_utr3_7_0_chr9_73013367_f,Ccpg1_NM_001286546_utr3_7_0_chr9_73013367_f	7	+	572	12	1	1.32965	0.000259
chr10	117051047	117051048	Cct2_NM_007636_utr3_0_0_chr10_117050998_r	148	-	248	148	1	0	0.00115
chr10	117051053	117051054	Cct2_NM_007636_utr3_0_0_chr10_117050998_r	77	-	248	77	1	0	0.00876
chr10	117051133	117051134	Cct2_NM_007636_utr3_0_0_chr10_117050998_r	118	-	248	118	1	0	0.00991
chr3	88321634	88321635	Cct3_NM_009836_utr3_13_0_chr3_88321549_f	5	+	218	5	1	0.246422	0.0013
chr11	23003314	23003315	Cct4_NM_009837_utr3_13_0_chr11_23003152_f	5	+	185	5	1	0	0.00211
chr5	129845859	129845860	Cct6a_NM_009838_utr3_12_0_chr5_129845821_f	22	+	623	22	1	0.0586195	0.000199
chr5	129845930	129845931	Cct6a_NM_009838_utr3_12_0_chr5_129845821_f	4	+	623	4	1	0.0586195	0.00145
chr5	129845966	129845967	Cct6a_NM_009838_utr3_12_0_chr5_129845821_f	6	+	623	9	1	0.0586195	0.000456
chr5	129845968	129845971	Cct6a_NM_009838_utr3_12_0_chr5_129845821_f	10	+	623	13	3	0.0586195	9.52e-05
chr5	129846011	129846012	Cct6a_NM_009838_utr3_12_0_chr5_129845821_f	13	+	623	13	1	0.0586195	0.00111
chr5	129846032	129846034	Cct6a_NM_009838_utr3_12_0_chr5_129845821_f	11	+	623	17	2	0.0586195	0.000302
chr5	129846056	129846057	Cct6a_NM_009838_utr3_12_0_chr5_129845821_f	16	+	623	16	1	0.0586195	2.08e-05
chr5	129846086	129846088	Cct6a_NM_009838_utr3_12_0_chr5_129845821_f	10	+	623	16	2	0.0586195	0.000133
chr5	129846097	129846098	Cct6a_NM_009838_utr3_12_0_chr5_129845821_f	20	+	623	20	1	0.0586195	0.000456
chr5	129846118	129846121	Cct6a_NM_009838_utr3_12_0_chr5_129845821_f	20	+	623	52	3	0.0586195	0.000737
chr5	129846184	129846185	Cct6a_NM_009838_utr3_12_0_chr5_129845821_f	6	+	623	6	1	0.0586195	0.000585
chr5	129846245	129846246	Cct6a_NM_009838_utr3_12_0_chr5_129845821_f	5	+	623	5	1	0.0586195	0.000701
chr5	129846253	129846254	Cct6a_NM_009838_utr3_12_0_chr5_129845821_f	6	+	623	6	1	0.0586195	0.00111
chr5	129846271	129846273	Cct6a_NM_009838_utr3_12_0_chr5_129845821_f	46	+	623	61	2	0.0586195	5.34e-09
chr5	129846315	129846318	Cct6a_NM_009838_utr3_12_0_chr5_129845821_f	32	+	623	48	3	0.0586195	9.52e-05
chr5	129846324	129846325	Cct6a_NM_009838_utr3_12_0_chr5_129845821_f	22	+	623	22	1	0.0586195	0.000301
chr6	85468360	85468361	Cct7_NM_007638_utr3_11_0_chr6_85468278_f	6	+	200	6	1	0.998999	0.000618
chr16	87483446	87483447	Cct8_NM_009840_utr3_0_0_chr16_87483325_r	5	-	663	5	1	0.811923	0.000428
chr16	87483875	87483876	Cct8_NM_009840_utr3_0_0_chr16_87483325_r	10	-	663	12	1	0.811923	1.62e-05
chr16	87483883	87483884	Cct8_NM_009840_utr3_0_0_chr16_87483325_r	9	-	663	9	1	0.811923	0.000259
chr16	87483905	87483906	Cct8_NM_009840_utr3_0_0_chr16_87483325_r	5	-	663	5	1	0.811923	0.000259
chr16	87483914	87483930	Cct8_NM_009840_utr3_0_0_chr16_87483325_r	93	-	663	398	16	0.811923	5.39e-11
chr16	87483931	87483935	Cct8_NM_009840_utr3_0_0_chr16_87483325_r	93	-	663	398	4	0.811923	4.01e-07
chr16	87483945	87483946	Cct8_NM_009840_utr3_0_0_chr16_87483325_r	7	-	663	7	1	0.811923	7.69e-05
chr16	87483958	87483962	Cct8_NM_009840_utr3_0_0_chr16_87483325_r	55	-	663	92	4	0.811923	1.11e-16
chr16	87483963	87483966	Cct8_NM_009840_utr3_0_0_chr16_87483325_r	34	-	663	76	3	0.811923	0.000259
chr16	87483970	87483972	Cct8_NM_009840_utr3_0_0_chr16_87483325_r	16	-	663	21	2	0.811923	4.31e-07
chr10	41529002	41529003	Cd164_NM_016898_utr3_5_0_chr10_41528842_f	6	+	2201	6	1	0.0165924	0.00105
chr10	41529011	41529012	Cd164_NM_016898_utr3_5_0_chr10_41528842_f	4	+	2201	4	1	0.0165924	0.00278
chr10	41529069	41529070	Cd164_NM_016898_utr3_5_0_chr10_41528842_f	7	+	2201	19	1	0.0165924	0.0015
chr10	41529096	41529097	Cd164_NM_016898_utr3_5_0_chr10_41528842_f	12	+	2201	12	1	0.0165924	0.0015
chr10	41529370	41529372	Cd164_NM_016898_utr3_5_0_chr10_41528842_f	20	+	2201	25	2	0.0165924	7.85e-05
chr10	41529643	41529645	Cd164_NM_016898_utr3_5_0_chr10_41528842_f	18	+	2201	28	2	0.0165924	0.000194
chr10	41529647	41529648	Cd164_NM_016898_utr3_5_0_chr10_41528842_f	8	+	2201	8	1	0.0165924	0.00105
chr10	41529722	41529723	Cd164_NM_016898_utr3_5_0_chr10_41528842_f	5	+	2201	9	1	0.0165924	0.00278
chr10	41529734	41529735	Cd164_NM_016898_utr3_5_0_chr10_41528842_f	14	+	2201	17	1	0.0165924	0.000691
chr10	41529757	41529758	Cd164_NM_016898_utr3_5_0_chr10_41528842_f	12	+	2201	12	1	0.0165924	0.000269
chr10	41529881	41529882	Cd164_NM_016898_utr3_5_0_chr10_41528842_f	8	+	2201	8	1	0.0165924	0.000549
chr10	41529885	41529886	Cd164_NM_016898_utr3_5_0_chr10_41528842_f	7	+	2201	11	1	0.0165924	0.000702
chr10	41530194	41530195	Cd164_NM_016898_utr3_5_0_chr10_41528842_f	6	+	2201	6	1	0.0165924	0.0015
chr10	41530211	41530212	Cd164_NM_016898_utr3_5_0_chr10_41528842_f	10	+	2201	14	1	0.0165924	0.000945
chr10	41530220	41530221	Cd164_NM_016898_utr3_5_0_chr10_41528842_f	11	+	2201	11	1	0.0165924	0.00138
chr10	41530230	41530231	Cd164_NM_016898_utr3_5_0_chr10_41528842_f	18	+	2201	26	1	0.0165924	0.00105
chr10	41530237	41530238	Cd164_NM_016898_utr3_5_0_chr10_41528842_f	18	+	2201	18	1	0.0165924	0.000403
chr10	41530264	41530265	Cd164_NM_016898_utr3_5_0_chr10_41528842_f	9	+	2201	9	1	0.0165924	0.00219
chr10	41530351	41530352	Cd164_NM_016898_utr3_5_0_chr10_41528842_f	8	+	2201	8	1	0.0165924	0.00105
chr10	41530383	41530385	Cd164_NM_016898_utr3_5_0_chr10_41528842_f	14	+	2201	21	2	0.0165924	0.00138
chr10	41530395	41530396	Cd164_NM_016898_utr3_5_0_chr10_41528842_f	12	+	2201	12	1	0.0165924	0.00105
chr10	41530401	41530403	Cd164_NM_016898_utr3_5_0_chr10_41528842_f	26	+	2201	37	2	0.0165924	0.000474
chr10	41530414	41530415	Cd164_NM_016898_utr3_5_0_chr10_41528842_f	7	+	2201	7	1	0.0165924	0.00219
chr10	41530422	41530424	Cd164_NM_016898_utr3_5_0_chr10_41528842_f	13	+	2201	37	2	0.0165924	0.000474
chr10	41530440	41530441	Cd164_NM_016898_utr3_5_0_chr10_41528842_f	20	+	2201	22	1	0.0165924	3.87e-05
chr10	41530442	41530443	Cd164_NM_016898_utr3_5_0_chr10_41528842_f	6	+	2201	6	1	0.0165924	0.00142
chr10	41530451	41530452	Cd164_NM_016898_utr3_5_0_chr10_41528842_f	40	+	2201	62	1	0.0165924	0.000453
chr10	41530453	41530454	Cd164_NM_016898_utr3_5_0_chr10_41528842_f	61	+	2201	62	1	0.0165924	6.1e-09
chr10	41530457	41530459	Cd164_NM_016898_utr3_5_0_chr10_41528842_f	33	+	2201	41	2	0.0165924	0.000104
chr10	41530462	41530463	Cd164_NM_016898_utr3_5_0_chr10_41528842_f	8	+	2201	8	1	0.0165924	0.00219
chr10	41530470	41530471	Cd164_NM_016898_utr3_5_0_chr10_41528842_f	18	+	2201	18	1	0.0165924	0.000269
chr10	41530477	41530478	Cd164_NM_016898_utr3_5_0_chr10_41528842_f	8	+	2201	8	1	0.0165924	0.00105
chr10	41530494	41530496	Cd164_NM_016898_utr3_5_0_chr10_41528842_f	22	+	2201	26	2	0.0165924	4.48e-05
chr10	41530511	41530512	Cd164_NM_016898_utr3_5_0_chr10_41528842_f	6	+	2201	6	1	0.0165924	0.00142
chr10	41530518	41530519	Cd164_NM_016898_utr3_5_0_chr10_41528842_f	8	+	2201	12	1	0.0165924	0.000786
chr10	41530534	41530535	Cd164_NM_016898_utr3_5_0_chr10_41528842_f	24	+	2201	24	1	0.0165924	0.000139
chr10	41530538	41530540	Cd164_NM_016898_utr3_5_0_chr10_41528842_f	23	+	2201	56	2	0.0165924	9.58e-05
chr10	41530566	41530567	Cd164_NM_016898_utr3_5_0_chr10_41528842_f	14	+	2201	21	1	0.0165924	0.00138
chr10	41530960	41530961	Cd164_NM_016898_utr3_5_0_chr10_41528842_f	10	+	2201	18	1	0.0165924	0.00219
chr10	41530965	41530966	Cd164_NM_016898_utr3_5_0_chr10_41528842_f	10	+	2201	10	1	0.0165924	0.000453
chr10	41530971	41530972	Cd164_NM_016898_utr3_5_0_chr10_41528842_f	17	+	2201	21	1	0.0165924	0.000786
chr10	41530975	41530976	Cd164_NM_016898_utr3_5_0_chr10_41528842_f	6	+	2201	6	1	0.0165924	0.00142
chr10	41530996	41530997	Cd164_NM_016898_utr3_5_0_chr10_41528842_f	4	+	2201	4	1	0.0165924	0.00219
chr10	41531014	41531015	Cd164_NM_016898_utr3_5_0_chr10_41528842_f	9	+	2201	17	1	0.0165924	0.000945
chr10	41531026	41531027	Cd164_NM_016898_utr3_5_0_chr10_41528842_f	6	+	2201	6	1	0.0165924	0.00219
chr10	43583255	43583256	Cd24a_NM_009846_utr3_1_0_chr10_43582766_f	10	+	1500	10	1	0	0.00243
chr6	125460308	125460309	Cd9_NM_007657_utr3_0_0_chr6_125460266_r	17	-	395	17	1	0	0.0036
chr4	118432931	118432932	Cdc20_NM_023223_utr3_0_0_chr4_118432901_r	6	-	62	6	1	0	0.00538
chr18	34633474	34633475	Cdc23_NM_178347_utr3_0_0_chr18_34631683_r	6	-	2311	11	1	3.28498	7.78e-05
chr9	109893653	109893654	Cdc25a_NM_007658_utr3_14_0_chr9_109892220_f	8	+	1671	8	1	0	0.000786
chr11	104502789	104502790	Cdc27_NM_001285988_utr3_0_0_chr11_104502526_r,Cdc27_NM_001285989_utr3_0_0_chr11_104502526_r,Cdc27_NM_001285990_utr3_0_0_chr11_104502526_r,Cdc27_NM_145436_utr3_0_0_chr11_104502526_r	8	-	3072	11	1	0	0.000116
chr19	29016508	29016509	Cdc37l1_NM_001302443_utr3_6_0_chr19_29015893_f,Cdc37l1_NM_025950_utr3_6_0_chr19_29016105_f	7	+	4345	7	1	0.00883618	0.00273
chr19	29017251	29017252	Cdc37l1_NM_001302443_utr3_6_0_chr19_29015893_f,Cdc37l1_NM_025950_utr3_6_0_chr19_29016105_f	6	+	4345	6	1	0.00883618	0.00195
chr10	40832944	40832945	Cdc40_NM_027879_utr3_0_0_chr10_40831622_r	6	-	1557	6	1	0	0.00419
chr4	137319766	137319767	Cdc42_NM_009861_utr3_0_0_chr4_137319696_r	7	-	1407	7	1	0.0124315	0.00165
chr4	137319825	137319827	Cdc42_NM_009861_utr3_0_0_chr4_137319696_r	14	-	1407	23	2	0.0124315	5.47e-06
chr4	137319836	137319838	Cdc42_NM_009861_utr3_0_0_chr4_137319696_r	9	-	1407	16	2	0.0124315	0.00165
chr4	137319839	137319840	Cdc42_NM_009861_utr3_0_0_chr4_137319696_r	9	-	1407	9	1	0.0124315	0.000385
chr4	137319853	137319854	Cdc42_NM_009861_utr3_0_0_chr4_137319696_r	7	-	1407	7	1	0.0124315	0.000568
chr4	137320353	137320354	Cdc42_NM_009861_utr3_0_0_chr4_137319696_r	7	-	1407	7	1	0.0124315	0.000954
chr4	137320546	137320547	Cdc42_NM_009861_utr3_0_0_chr4_137319696_r	6	-	1407	6	1	0.0124315	0.00165
chr4	137320610	137320613	Cdc42_NM_009861_utr3_0_0_chr4_137319696_r	32	-	1407	54	3	0.0124315	5.55e-06
chr4	137320621	137320623	Cdc42_NM_009861_utr3_0_0_chr4_137319696_r	8	-	1407	14	2	0.0124315	0.000986
chr4	137320766	137320767	Cdc42_NM_009861_utr3_0_0_chr4_137319696_r	8	-	1407	12	1	0.0124315	0.000907
chr4	137320783	137320785	Cdc42_NM_009861_utr3_0_0_chr4_137319696_r	8	-	1407	13	2	0.0124315	0.000593
chr4	137320804	137320807	Cdc42_NM_009861_utr3_0_0_chr4_137319696_r	38	-	1407	49	3	0.0124315	1.58e-08
chr4	137320809	137320810	Cdc42_NM_009861_utr3_0_0_chr4_137319696_r	16	-	1407	39	1	0.0124315	0.000593
chr4	137320811	137320812	Cdc42_NM_009861_utr3_0_0_chr4_137319696_r	16	-	1407	39	1	0.0124315	5.62e-05
chr4	137320813	137320815	Cdc42_NM_009861_utr3_0_0_chr4_137319696_r	9	-	1407	19	2	0.0124315	0.000593
chr4	137320820	137320821	Cdc42_NM_009861_utr3_0_0_chr4_137319696_r	22	-	1407	22	1	0.0124315	0.000986
chr4	137320850	137320855	Cdc42_NM_009861_utr3_0_0_chr4_137319696_r	30	-	1407	75	5	0.0124315	4.15e-10
chr4	137320858	137320862	Cdc42_NM_009861_utr3_0_0_chr4_137319696_r	12	-	1407	26	4	0.0124315	0.000986
chr4	137320865	137320866	Cdc42_NM_009861_utr3_0_0_chr4_137319696_r	16	-	1407	32	1	0.0124315	0.000954
chr4	137320867	137320868	Cdc42_NM_009861_utr3_0_0_chr4_137319696_r	16	-	1407	32	1	0.0124315	0.00165
chr4	137320871	137320872	Cdc42_NM_009861_utr3_0_0_chr4_137319696_r	12	-	1407	22	1	0.0124315	0.00165
chr4	137321008	137321009	Cdc42_NM_009861_utr3_0_0_chr4_137319696_r	4	-	1407	8	1	0.0124315	0.000986
chr4	137321019	137321020	Cdc42_NM_009861_utr3_0_0_chr4_137319696_r	5	-	1407	5	1	0.0124315	0.00165
chr1	180162472	180162473	Cdc42bpa_NM_001033285_utr3_36_0_chr1_180162167_f,Cdc42bpa_NM_001346804_utr3_35_0_chr1_180162167_f,Cdc42bpa_NM_001346805_utr3_34_0_chr1_180162167_f	8	+	3437	8	1	0.151956	0.000243
chr12	111293012	111293013	Cdc42bpb_NM_183016_utr3_0_0_chr12_111292972_r	10	-	1129	10	1	0.0629203	0.000396
chr12	111293915	111293916	Cdc42bpb_NM_183016_utr3_0_0_chr12_111292972_r	6	-	1129	6	1	0.0629203	0.00114
chr12	111293952	111293955	Cdc42bpb_NM_183016_utr3_0_0_chr12_111292972_r	15	-	1129	30	3	0.0629203	3.13e-05
chr11	113727537	113727538	Cdc42ep4_NM_001163346_utr3_0_0_chr11_113726850_r,Cdc42ep4_NM_020006_utr3_0_0_chr11_113726850_r	7	-	1664	7	1	0.0160895	0.000952
chr11	54718903	54718904	Cdc42se2_NM_178626_utr3_0_0_chr11_54717415_r	7	-	2310	7	1	0.0191619	0.000479
chr11	54719092	54719093	Cdc42se2_NM_178626_utr3_0_0_chr11_54717415_r	5	-	2310	5	1	0.0191619	0.00191
chr11	54719408	54719409	Cdc42se2_NM_178626_utr3_0_0_chr11_54717415_r	4	-	2310	4	1	0.0191619	0.00191
chr11	54719688	54719689	Cdc42se2_NM_178626_utr3_0_0_chr11_54717415_r	5	-	2310	5	1	0.0191619	0.00162
chr17	45392049	45392050	Cdc5l_NM_152810_utr3_0_0_chr17_45391888_r	7	-	312	7	1	0	0.00182
chr5	106983858	106983859	Cdc7_NM_001271566_utr3_11_0_chr5_106983356_f,Cdc7_NM_001271567_utr3_10_0_chr5_106983356_f,Cdc7_NM_001271568_utr3_10_0_chr5_106983356_f,Cdc7_NM_009863_utr3_11_0_chr5_106983356_f	15	+	1084	15	1	0	0.00445
chr5	106984157	106984158	Cdc7_NM_001271566_utr3_11_0_chr5_106983356_f,Cdc7_NM_001271567_utr3_10_0_chr5_106983356_f,Cdc7_NM_001271568_utr3_10_0_chr5_106983356_f,Cdc7_NM_009863_utr3_11_0_chr5_106983356_f	9	+	1084	9	1	0	0.00219
chr5	106984377	106984378	Cdc7_NM_001271566_utr3_11_0_chr5_106983356_f,Cdc7_NM_001271567_utr3_10_0_chr5_106983356_f,Cdc7_NM_001271568_utr3_10_0_chr5_106983356_f,Cdc7_NM_009863_utr3_11_0_chr5_106983356_f	5	+	1084	5	1	0	0.00445
chr1	143607928	143607929	Cdc73_NM_145991_utr3_0_0_chr1_143603276_r	7	-	5245	7	1	0	0.00173
chr1	143607941	143607942	Cdc73_NM_145991_utr3_0_0_chr1_143603276_r	5	-	5245	5	1	0	0.00104
chr1	143608192	143608193	Cdc73_NM_145991_utr3_0_0_chr1_143603276_r	6	-	5245	6	1	0	0.00173
chr12	112820289	112820290	Cdca4_NM_028023_utr3_0_0_chr12_112820235_r	8	-	1158	8	1	0.0915537	0.000791
chr12	112821080	112821081	Cdca4_NM_028023_utr3_0_0_chr12_112820235_r	7	-	1158	7	1	0.0915537	0.00132
chr12	112821108	112821109	Cdca4_NM_028023_utr3_0_0_chr12_112820235_r	6	-	1158	6	1	0.0915537	0.00132
chr2	72485851	72485852	Cdca7_NM_025866_utr3_8_0_chr2_72485751_f	7	+	1140	7	1	0	0.00561
chr2	72486377	72486378	Cdca7_NM_025866_utr3_8_0_chr2_72485751_f	16	+	1140	16	1	0	0.00393
chr2	72486656	72486657	Cdca7_NM_025866_utr3_8_0_chr2_72485751_f	20	+	1140	20	1	0	0.000244
chr12	117877576	117877578	Cdca7l_NM_146040_utr3_9_0_chr12_117877486_f	16	+	1221	25	2	0.163636	1.7e-06
chr12	117877586	117877588	Cdca7l_NM_146040_utr3_9_0_chr12_117877486_f	10	+	1221	17	2	0.163636	6.01e-05
chr12	117877593	117877594	Cdca7l_NM_146040_utr3_9_0_chr12_117877486_f	7	+	1221	7	1	0.163636	0.00022
chr12	117877607	117877609	Cdca7l_NM_146040_utr3_9_0_chr12_117877486_f	16	+	1221	16	2	0.163636	0.000341
chr12	117877621	117877624	Cdca7l_NM_146040_utr3_9_0_chr12_117877486_f	15	+	1221	33	3	0.163636	6.29e-06
chr12	117877630	117877631	Cdca7l_NM_146040_utr3_9_0_chr12_117877486_f	7	+	1221	7	1	0.163636	0.00102
chr12	117877721	117877722	Cdca7l_NM_146040_utr3_9_0_chr12_117877486_f	8	+	1221	11	1	0.163636	0.000102
chr12	117877733	117877734	Cdca7l_NM_146040_utr3_9_0_chr12_117877486_f	7	+	1221	7	1	0.163636	0.000272
chr12	117877766	117877767	Cdca7l_NM_146040_utr3_9_0_chr12_117877486_f	14	+	1221	14	1	0.163636	8.91e-05
chr12	117878082	117878083	Cdca7l_NM_146040_utr3_9_0_chr12_117877486_f	4	+	1221	4	1	0.163636	0.00102
chr12	117878098	117878099	Cdca7l_NM_146040_utr3_9_0_chr12_117877486_f	9	+	1221	11	1	0.163636	0.00059
chr12	117878114	117878115	Cdca7l_NM_146040_utr3_9_0_chr12_117877486_f	19	+	1221	19	1	0.163636	0.00102
chr12	117878212	117878213	Cdca7l_NM_146040_utr3_9_0_chr12_117877486_f	12	+	1221	12	1	0.163636	0.000341
chr12	117878236	117878237	Cdca7l_NM_146040_utr3_9_0_chr12_117877486_f	17	+	1221	17	1	0.163636	0.000582
chr12	117878661	117878662	Cdca7l_NM_146040_utr3_9_0_chr12_117877486_f	4	+	1221	4	1	0.163636	0.00102
chr12	117878672	117878673	Cdca7l_NM_146040_utr3_9_0_chr12_117877486_f	10	+	1221	16	1	0.163636	0.000793
chr12	117878679	117878680	Cdca7l_NM_146040_utr3_9_0_chr12_117877486_f	17	+	1221	17	1	0.163636	7.52e-06
chr4	124918498	124918499	Cdca8_NM_026560_utr3_0_0_chr4_124918465_r	16	-	521	16	1	0	0.00225
chr4	124918579	124918580	Cdca8_NM_026560_utr3_0_0_chr4_124918465_r	23	-	521	26	1	0	0.00055
chr13	17717548	17717549	Cdk13_NM_001081058_utr3_0_0_chr13_17715962_r,Cdk13_NM_027118_utr3_0_0_chr13_17715962_r	9	-	2099	9	1	0.235881	0.000445
chr13	17717643	17717645	Cdk13_NM_001081058_utr3_0_0_chr13_17715962_r,Cdk13_NM_027118_utr3_0_0_chr13_17715962_r	9	-	2099	13	2	0.235881	7.08e-05
chr13	17717716	17717717	Cdk13_NM_001081058_utr3_0_0_chr13_17715962_r,Cdk13_NM_027118_utr3_0_0_chr13_17715962_r	5	-	2099	5	1	0.235881	0.000856
chr10	93239830	93239832	Cdk17_NM_146239_utr3_16_0_chr10_93239626_f	8	+	1717	13	2	0.0212696	0.00041
chr10	93240015	93240016	Cdk17_NM_146239_utr3_16_0_chr10_93239626_f	6	+	1717	6	1	0.0212696	0.002
chr10	93240050	93240051	Cdk17_NM_146239_utr3_16_0_chr10_93239626_f	10	+	1717	10	1	0.0212696	0.000447
chr10	93240097	93240098	Cdk17_NM_146239_utr3_16_0_chr10_93239626_f	13	+	1717	52	1	0.0212696	0.00137
chr10	93240099	93240103	Cdk17_NM_146239_utr3_16_0_chr10_93239626_f	13	+	1717	52	4	0.0212696	0.000449
chr10	93240110	93240111	Cdk17_NM_146239_utr3_16_0_chr10_93239626_f	17	+	1717	17	1	0.0212696	0.0013
chr10	93240886	93240887	Cdk17_NM_146239_utr3_16_0_chr10_93239626_f	9	+	1717	9	1	0.0212696	0.000867
chr10	93240944	93240945	Cdk17_NM_146239_utr3_16_0_chr10_93239626_f	8	+	1717	8	1	0.0212696	0.000628
chr10	93240973	93240974	Cdk17_NM_146239_utr3_16_0_chr10_93239626_f	12	+	1717	12	1	0.0212696	0.000447
chr10	93240984	93240985	Cdk17_NM_146239_utr3_16_0_chr10_93239626_f	5	+	1717	5	1	0.0212696	0.002
chr10	93241018	93241019	Cdk17_NM_146239_utr3_16_0_chr10_93239626_f	6	+	1717	6	1	0.0212696	0.002
chr10	93241288	93241289	Cdk17_NM_146239_utr3_16_0_chr10_93239626_f	13	+	1717	27	1	0.0212696	0.000133
chr10	93241295	93241298	Cdk17_NM_146239_utr3_16_0_chr10_93239626_f	8	+	1717	20	3	0.0212696	0.00137
chr10	128697974	128697975	Cdk2_NM_016756_utr3_0_0_chr10_128697939_r,Cdk2_NM_183417_utr3_0_0_chr10_128697939_r	10	-	1167	10	1	0.0229417	0.000836
chr10	128697987	128697988	Cdk2_NM_016756_utr3_0_0_chr10_128697939_r,Cdk2_NM_183417_utr3_0_0_chr10_128697939_r	6	-	1167	11	1	0.0229417	0.000836
chr10	128697994	128697995	Cdk2_NM_016756_utr3_0_0_chr10_128697939_r,Cdk2_NM_183417_utr3_0_0_chr10_128697939_r	8	-	1167	8	1	0.0229417	0.000864
chr10	128698054	128698055	Cdk2_NM_016756_utr3_0_0_chr10_128697939_r,Cdk2_NM_183417_utr3_0_0_chr10_128697939_r	11	-	1167	11	1	0.0229417	0.000516
chr10	128698110	128698111	Cdk2_NM_016756_utr3_0_0_chr10_128697939_r,Cdk2_NM_183417_utr3_0_0_chr10_128697939_r	4	-	1167	4	1	0.0229417	0.00135
chr10	128698171	128698172	Cdk2_NM_016756_utr3_0_0_chr10_128697939_r,Cdk2_NM_183417_utr3_0_0_chr10_128697939_r	6	-	1167	10	1	0.0229417	0.00135
chr10	128698177	128698178	Cdk2_NM_016756_utr3_0_0_chr10_128697939_r,Cdk2_NM_183417_utr3_0_0_chr10_128697939_r	6	-	1167	6	1	0.0229417	0.00146
chr10	128698495	128698496	Cdk2_NM_016756_utr3_0_0_chr10_128697939_r,Cdk2_NM_183417_utr3_0_0_chr10_128697939_r	5	-	1167	9	1	0.0229417	0.000516
chr10	128698592	128698593	Cdk2_NM_016756_utr3_0_0_chr10_128697939_r,Cdk2_NM_183417_utr3_0_0_chr10_128697939_r	5	-	1167	5	1	0.0229417	0.00146
chr10	128698621	128698622	Cdk2_NM_016756_utr3_0_0_chr10_128697939_r,Cdk2_NM_183417_utr3_0_0_chr10_128697939_r	5	-	1167	5	1	0.0229417	0.00146
chr5	3521023	3521024	Cdk6_NM_009873_utr3_7_0_chr5_3520792_f	7	+	10214	11	1	0.0124104	0.000732
chr5	146301878	146301879	Cdk8_NM_153599_utr3_12_0_chr5_146301702_f	14	+	1173	20	1	0	0.000324
chr5	146302251	146302252	Cdk8_NM_153599_utr3_12_0_chr5_146301702_f	11	+	1173	12	1	0	0.00137
chr5	146302844	146302845	Cdk8_NM_153599_utr3_12_0_chr5_146301702_f	12	+	1173	12	1	0	0.00105
chr2	32707470	32707472	Cdk9_NM_130860_utr3_0_0_chr2_32705782_r	19	-	2142	37	2	0	0.000251
chr6	134924454	134924455	Cdkn1b_NM_009875_utr3_2_0_chr6_134924243_f	7	+	1283	7	1	0	0.0093
chr6	134924491	134924492	Cdkn1b_NM_009875_utr3_2_0_chr6_134924243_f	10	+	1283	10	1	0	0.00243
chr6	134924564	134924565	Cdkn1b_NM_009875_utr3_2_0_chr6_134924243_f	8	+	1283	8	1	0	0.00371
chr6	134924656	134924657	Cdkn1b_NM_009875_utr3_2_0_chr6_134924243_f	10	+	1283	17	1	0	0.0025
chr6	134924662	134924663	Cdkn1b_NM_009875_utr3_2_0_chr6_134924243_f	6	+	1283	6	1	0	0.0093
chr4	89274507	89274508	Cdkn2a_NM_001040654_utr3_0_0_chr4_89274473_r,Cdkn2a_NM_009877_utr3_0_0_chr4_89274473_r	5	-	302	5	1	0	0.00151
chr11	51976280	51976281	Cdkn2aipnl_NM_029976_utr3_2_0_chr11_51975912_f	15	+	1425	15	1	0	0.00127
chr11	51976659	51976660	Cdkn2aipnl_NM_029976_utr3_2_0_chr11_51975912_f	20	+	1425	20	1	0	0.00421
chr9	35507553	35507554	Cdon_NM_021339_utr3_18_0_chr9_35504221_f	11	+	3432	11	1	0.010641	0.000486
chr2	132305452	132305453	Cds2_NM_001291039_utr3_12_0_chr2_132305286_f,Cds2_NM_138651_utr3_12_0_chr2_132305286_f	6	+	6765	6	1	0	0.000147
chr8	122573077	122573078	Cdt1_NM_026014_utr3_9_0_chr8_122572655_f	5	+	476	9	1	0	0.0012
chr13	35872967	35872968	Cdyl_NM_001123386_utr3_6_0_chr13_35872671_f,Cdyl_NM_009881_utr3_9_0_chr13_35872671_f	5	+	1394	8	1	0.0261979	0.00201
chr13	35872996	35872997	Cdyl_NM_001123386_utr3_6_0_chr13_35872671_f,Cdyl_NM_009881_utr3_9_0_chr13_35872671_f	16	+	1394	16	1	0.0261979	0.000216
chr13	35873017	35873018	Cdyl_NM_001123386_utr3_6_0_chr13_35872671_f,Cdyl_NM_009881_utr3_9_0_chr13_35872671_f	5	+	1394	5	1	0.0261979	0.00224
chr13	35873372	35873373	Cdyl_NM_001123386_utr3_6_0_chr13_35872671_f,Cdyl_NM_009881_utr3_9_0_chr13_35872671_f	10	+	1394	10	1	0.0261979	0.00153
chr13	35873476	35873477	Cdyl_NM_001123386_utr3_6_0_chr13_35872671_f,Cdyl_NM_009881_utr3_9_0_chr13_35872671_f	11	+	1394	11	1	0.0261979	0.00201
chr2	167690272	167690273	Cebpb_NM_001287738_utr3_0_0_chr2_167689913_f,Cebpb_NM_001287739_utr3_0_0_chr2_167689913_f,Cebpb_NM_009883_utr3_0_0_chr2_167689913_f	5	+	520	5	1	0	0.00707
chr2	167690309	167690310	Cebpb_NM_001287738_utr3_0_0_chr2_167689913_f,Cebpb_NM_001287739_utr3_0_0_chr2_167689913_f,Cebpb_NM_009883_utr3_0_0_chr2_167689913_f	6	+	520	6	1	0	0.00707
chr2	167690361	167690362	Cebpb_NM_001287738_utr3_0_0_chr2_167689913_f,Cebpb_NM_001287739_utr3_0_0_chr2_167689913_f,Cebpb_NM_009883_utr3_0_0_chr2_167689913_f	9	+	520	12	1	0	0.00156
chr6	120766831	120766832	Cecr2_NM_001128151_utr3_18_0_chr6_120766418_f	7	+	4774	11	1	0.113414	0.000292
chr6	120766860	120766861	Cecr2_NM_001128151_utr3_18_0_chr6_120766418_f	16	+	4774	21	1	0.113414	0.000607
chr6	120766891	120766892	Cecr2_NM_001128151_utr3_18_0_chr6_120766418_f	5	+	4774	5	1	0.113414	0.000607
chr6	120767222	120767223	Cecr2_NM_001128151_utr3_18_0_chr6_120766418_f	7	+	4774	7	1	0.113414	0.000347
chr6	120767527	120767528	Cecr2_NM_001128151_utr3_18_0_chr6_120766418_f	7	+	4774	7	1	0.113414	0.000849
chr6	120769616	120769617	Cecr2_NM_001128151_utr3_18_0_chr6_120766418_f	10	+	4774	10	1	0.113414	0.00138
chr2	91016579	91016580	Celf1_NM_001244891_utr3_14_0_chr2_91013491_f,Celf1_NM_001244903_utr3_13_0_chr2_91013491_f,Celf1_NM_017368_utr3_14_0_chr2_91016566_f,Celf1_NM_198683_utr3_13_0_chr2_91016566_f	5	+	6007	5	1	0.0249113	0.00154
chr2	91016816	91016817	Celf1_NM_001244891_utr3_14_0_chr2_91013491_f,Celf1_NM_001244903_utr3_13_0_chr2_91013491_f,Celf1_NM_017368_utr3_14_0_chr2_91016566_f,Celf1_NM_198683_utr3_13_0_chr2_91016566_f	5	+	6007	5	1	0.0249113	0.00154
chr2	91017007	91017008	Celf1_NM_001244891_utr3_14_0_chr2_91013491_f,Celf1_NM_001244903_utr3_13_0_chr2_91013491_f,Celf1_NM_017368_utr3_14_0_chr2_91016566_f,Celf1_NM_198683_utr3_13_0_chr2_91016566_f	4	+	6007	8	1	0.0249113	0.00162
chr2	91017461	91017462	Celf1_NM_001244891_utr3_14_0_chr2_91013491_f,Celf1_NM_001244903_utr3_13_0_chr2_91013491_f,Celf1_NM_017368_utr3_14_0_chr2_91016566_f,Celf1_NM_198683_utr3_13_0_chr2_91016566_f	4	+	6007	4	1	0.0249113	0.00292
chr2	91017574	91017575	Celf1_NM_001244891_utr3_14_0_chr2_91013491_f,Celf1_NM_001244903_utr3_13_0_chr2_91013491_f,Celf1_NM_017368_utr3_14_0_chr2_91016566_f,Celf1_NM_198683_utr3_13_0_chr2_91016566_f	20	+	6007	27	1	0.0249113	2.09e-05
chr2	91017608	91017609	Celf1_NM_001244891_utr3_14_0_chr2_91013491_f,Celf1_NM_001244903_utr3_13_0_chr2_91013491_f,Celf1_NM_017368_utr3_14_0_chr2_91016566_f,Celf1_NM_198683_utr3_13_0_chr2_91016566_f	10	+	6007	10	1	0.0249113	0.00107
chr2	91018800	91018801	Celf1_NM_001244891_utr3_14_0_chr2_91013491_f,Celf1_NM_001244903_utr3_13_0_chr2_91013491_f,Celf1_NM_017368_utr3_14_0_chr2_91016566_f,Celf1_NM_198683_utr3_13_0_chr2_91016566_f	6	+	6007	6	1	0.0249113	0.00154
chr2	91018846	91018847	Celf1_NM_001244891_utr3_14_0_chr2_91013491_f,Celf1_NM_001244903_utr3_13_0_chr2_91013491_f,Celf1_NM_017368_utr3_14_0_chr2_91016566_f,Celf1_NM_198683_utr3_13_0_chr2_91016566_f	17	+	6007	17	1	0.0249113	0.000712
chr2	91018911	91018912	Celf1_NM_001244891_utr3_14_0_chr2_91013491_f,Celf1_NM_001244903_utr3_13_0_chr2_91013491_f,Celf1_NM_017368_utr3_14_0_chr2_91016566_f,Celf1_NM_198683_utr3_13_0_chr2_91016566_f	7	+	6007	7	1	0.0249113	0.00076
chr2	91018958	91018959	Celf1_NM_001244891_utr3_14_0_chr2_91013491_f,Celf1_NM_001244903_utr3_13_0_chr2_91013491_f,Celf1_NM_017368_utr3_14_0_chr2_91016566_f,Celf1_NM_198683_utr3_13_0_chr2_91016566_f	10	+	6007	11	1	0.0249113	0.000473
chr2	91019119	91019120	Celf1_NM_001244891_utr3_14_0_chr2_91013491_f,Celf1_NM_001244903_utr3_13_0_chr2_91013491_f,Celf1_NM_017368_utr3_14_0_chr2_91016566_f,Celf1_NM_198683_utr3_13_0_chr2_91016566_f	8	+	6007	8	1	0.0249113	0.00223
chr2	91019141	91019142	Celf1_NM_001244891_utr3_14_0_chr2_91013491_f,Celf1_NM_001244903_utr3_13_0_chr2_91013491_f,Celf1_NM_017368_utr3_14_0_chr2_91016566_f,Celf1_NM_198683_utr3_13_0_chr2_91016566_f	11	+	6007	11	1	0.0249113	0.00103
chr2	91019148	91019149	Celf1_NM_001244891_utr3_14_0_chr2_91013491_f,Celf1_NM_001244903_utr3_13_0_chr2_91013491_f,Celf1_NM_017368_utr3_14_0_chr2_91016566_f,Celf1_NM_198683_utr3_13_0_chr2_91016566_f	17	+	6007	17	1	0.0249113	0.00107
chr2	91019162	91019163	Celf1_NM_001244891_utr3_14_0_chr2_91013491_f,Celf1_NM_001244903_utr3_13_0_chr2_91013491_f,Celf1_NM_017368_utr3_14_0_chr2_91016566_f,Celf1_NM_198683_utr3_13_0_chr2_91016566_f	8	+	6007	8	1	0.0249113	0.00148
chr2	91019198	91019199	Celf1_NM_001244891_utr3_14_0_chr2_91013491_f,Celf1_NM_001244903_utr3_13_0_chr2_91013491_f,Celf1_NM_017368_utr3_14_0_chr2_91016566_f,Celf1_NM_198683_utr3_13_0_chr2_91016566_f	9	+	6007	9	1	0.0249113	0.00223
chr2	91019218	91019221	Celf1_NM_001244891_utr3_14_0_chr2_91013491_f,Celf1_NM_001244903_utr3_13_0_chr2_91013491_f,Celf1_NM_017368_utr3_14_0_chr2_91016566_f,Celf1_NM_198683_utr3_13_0_chr2_91016566_f	15	+	6007	53	3	0.0249113	0.00154
chr2	91019276	91019277	Celf1_NM_001244891_utr3_14_0_chr2_91013491_f,Celf1_NM_001244903_utr3_13_0_chr2_91013491_f,Celf1_NM_017368_utr3_14_0_chr2_91016566_f,Celf1_NM_198683_utr3_13_0_chr2_91016566_f	24	+	6007	24	1	0.0249113	0.000188
chr2	91019308	91019309	Celf1_NM_001244891_utr3_14_0_chr2_91013491_f,Celf1_NM_001244903_utr3_13_0_chr2_91013491_f,Celf1_NM_017368_utr3_14_0_chr2_91016566_f,Celf1_NM_198683_utr3_13_0_chr2_91016566_f	6	+	6007	6	1	0.0249113	0.00199
chr2	91019315	91019316	Celf1_NM_001244891_utr3_14_0_chr2_91013491_f,Celf1_NM_001244903_utr3_13_0_chr2_91013491_f,Celf1_NM_017368_utr3_14_0_chr2_91016566_f,Celf1_NM_198683_utr3_13_0_chr2_91016566_f	23	+	6007	25	1	0.0249113	0.000106
chr2	91019337	91019338	Celf1_NM_001244891_utr3_14_0_chr2_91013491_f,Celf1_NM_001244903_utr3_13_0_chr2_91013491_f,Celf1_NM_017368_utr3_14_0_chr2_91016566_f,Celf1_NM_198683_utr3_13_0_chr2_91016566_f	10	+	6007	19	1	0.0249113	0.00103
chr2	91019402	91019403	Celf1_NM_001244891_utr3_14_0_chr2_91013491_f,Celf1_NM_001244903_utr3_13_0_chr2_91013491_f,Celf1_NM_017368_utr3_14_0_chr2_91016566_f,Celf1_NM_198683_utr3_13_0_chr2_91016566_f	4	+	6007	8	1	0.0249113	0.00223
chr2	91019435	91019436	Celf1_NM_001244891_utr3_14_0_chr2_91013491_f,Celf1_NM_001244903_utr3_13_0_chr2_91013491_f,Celf1_NM_017368_utr3_14_0_chr2_91016566_f,Celf1_NM_198683_utr3_13_0_chr2_91016566_f	8	+	6007	12	1	0.0249113	0.00148
chr2	91019467	91019468	Celf1_NM_001244891_utr3_14_0_chr2_91013491_f,Celf1_NM_001244903_utr3_13_0_chr2_91013491_f,Celf1_NM_017368_utr3_14_0_chr2_91016566_f,Celf1_NM_198683_utr3_13_0_chr2_91016566_f	12	+	6007	16	1	0.0249113	0.000336
chr2	6541908	6541909	Celf2_NM_001110228_utr3_0_0_chr2_6539699_r,Celf2_NM_001110229_utr3_0_0_chr2_6539699_r,Celf2_NM_001110230_utr3_0_0_chr2_6539699_r,Celf2_NM_001110231_utr3_0_0_chr2_6539699_r,Celf2_NM_001110232_utr3_0_0_chr2_6539699_r,Celf2_NM_001160292_utr3_0_0_chr2_6539699_r,Celf2_NM_001160293_utr3_0_0_chr2_6539699_r,Celf2_NM_001310447_utr3_0_0_chr2_6539699_r,Celf2_NM_001347094_utr3_0_0_chr2_6539699_r,Celf2_NM_010…	4	-	7387	4	1	0.00447933	0.00169
chr2	6541923	6541924	Celf2_NM_001110228_utr3_0_0_chr2_6539699_r,Celf2_NM_001110229_utr3_0_0_chr2_6539699_r,Celf2_NM_001110230_utr3_0_0_chr2_6539699_r,Celf2_NM_001110231_utr3_0_0_chr2_6539699_r,Celf2_NM_001110232_utr3_0_0_chr2_6539699_r,Celf2_NM_001160292_utr3_0_0_chr2_6539699_r,Celf2_NM_001160293_utr3_0_0_chr2_6539699_r,Celf2_NM_001310447_utr3_0_0_chr2_6539699_r,Celf2_NM_001347094_utr3_0_0_chr2_6539699_r,Celf2_NM_010…	5	-	7387	5	1	0.00447933	0.000996
chr2	6542012	6542013	Celf2_NM_001110228_utr3_0_0_chr2_6539699_r,Celf2_NM_001110229_utr3_0_0_chr2_6539699_r,Celf2_NM_001110230_utr3_0_0_chr2_6539699_r,Celf2_NM_001110231_utr3_0_0_chr2_6539699_r,Celf2_NM_001110232_utr3_0_0_chr2_6539699_r,Celf2_NM_001160292_utr3_0_0_chr2_6539699_r,Celf2_NM_001160293_utr3_0_0_chr2_6539699_r,Celf2_NM_001310447_utr3_0_0_chr2_6539699_r,Celf2_NM_001347094_utr3_0_0_chr2_6539699_r,Celf2_NM_010…	9	-	7387	9	1	0.00447933	0.00098
chr2	6542155	6542156	Celf2_NM_001110228_utr3_0_0_chr2_6539699_r,Celf2_NM_001110229_utr3_0_0_chr2_6539699_r,Celf2_NM_001110230_utr3_0_0_chr2_6539699_r,Celf2_NM_001110231_utr3_0_0_chr2_6539699_r,Celf2_NM_001110232_utr3_0_0_chr2_6539699_r,Celf2_NM_001160292_utr3_0_0_chr2_6539699_r,Celf2_NM_001160293_utr3_0_0_chr2_6539699_r,Celf2_NM_001310447_utr3_0_0_chr2_6539699_r,Celf2_NM_001347094_utr3_0_0_chr2_6539699_r,Celf2_NM_010…	5	-	7387	5	1	0.00447933	0.00169
chr2	6542173	6542174	Celf2_NM_001110228_utr3_0_0_chr2_6539699_r,Celf2_NM_001110229_utr3_0_0_chr2_6539699_r,Celf2_NM_001110230_utr3_0_0_chr2_6539699_r,Celf2_NM_001110231_utr3_0_0_chr2_6539699_r,Celf2_NM_001110232_utr3_0_0_chr2_6539699_r,Celf2_NM_001160292_utr3_0_0_chr2_6539699_r,Celf2_NM_001160293_utr3_0_0_chr2_6539699_r,Celf2_NM_001310447_utr3_0_0_chr2_6539699_r,Celf2_NM_001347094_utr3_0_0_chr2_6539699_r,Celf2_NM_010…	9	-	7387	9	1	0.00447933	0.000598
chr2	6542527	6542528	Celf2_NM_001110228_utr3_0_0_chr2_6539699_r,Celf2_NM_001110229_utr3_0_0_chr2_6539699_r,Celf2_NM_001110230_utr3_0_0_chr2_6539699_r,Celf2_NM_001110231_utr3_0_0_chr2_6539699_r,Celf2_NM_001110232_utr3_0_0_chr2_6539699_r,Celf2_NM_001160292_utr3_0_0_chr2_6539699_r,Celf2_NM_001160293_utr3_0_0_chr2_6539699_r,Celf2_NM_001310447_utr3_0_0_chr2_6539699_r,Celf2_NM_001347094_utr3_0_0_chr2_6539699_r,Celf2_NM_010…	5	-	7387	10	1	0.00447933	0.00098
chr2	6542571	6542572	Celf2_NM_001110228_utr3_0_0_chr2_6539699_r,Celf2_NM_001110229_utr3_0_0_chr2_6539699_r,Celf2_NM_001110230_utr3_0_0_chr2_6539699_r,Celf2_NM_001110231_utr3_0_0_chr2_6539699_r,Celf2_NM_001110232_utr3_0_0_chr2_6539699_r,Celf2_NM_001160292_utr3_0_0_chr2_6539699_r,Celf2_NM_001160293_utr3_0_0_chr2_6539699_r,Celf2_NM_001310447_utr3_0_0_chr2_6539699_r,Celf2_NM_001347094_utr3_0_0_chr2_6539699_r,Celf2_NM_010…	8	-	7387	12	1	0.00447933	0.000358
chr2	6542695	6542697	Celf2_NM_001110228_utr3_0_0_chr2_6539699_r,Celf2_NM_001110229_utr3_0_0_chr2_6539699_r,Celf2_NM_001110230_utr3_0_0_chr2_6539699_r,Celf2_NM_001110231_utr3_0_0_chr2_6539699_r,Celf2_NM_001110232_utr3_0_0_chr2_6539699_r,Celf2_NM_001160292_utr3_0_0_chr2_6539699_r,Celf2_NM_001160293_utr3_0_0_chr2_6539699_r,Celf2_NM_001310447_utr3_0_0_chr2_6539699_r,Celf2_NM_001347094_utr3_0_0_chr2_6539699_r,Celf2_NM_010…	8	-	7387	14	2	0.00447933	0.000586
chr2	6544150	6544151	Celf2_NM_001110228_utr3_0_0_chr2_6539699_r,Celf2_NM_001110229_utr3_0_0_chr2_6539699_r,Celf2_NM_001110230_utr3_0_0_chr2_6539699_r,Celf2_NM_001110231_utr3_0_0_chr2_6539699_r,Celf2_NM_001110232_utr3_0_0_chr2_6539699_r,Celf2_NM_001160292_utr3_0_0_chr2_6539699_r,Celf2_NM_001160293_utr3_0_0_chr2_6539699_r,Celf2_NM_001310447_utr3_0_0_chr2_6539699_r,Celf2_NM_001347094_utr3_0_0_chr2_6539699_r,Celf2_NM_010…	7	-	7387	7	1	0.00447933	0.00169
chr2	6544394	6544396	Celf2_NM_001110228_utr3_0_0_chr2_6539699_r,Celf2_NM_001110229_utr3_0_0_chr2_6539699_r,Celf2_NM_001110230_utr3_0_0_chr2_6539699_r,Celf2_NM_001110231_utr3_0_0_chr2_6539699_r,Celf2_NM_001110232_utr3_0_0_chr2_6539699_r,Celf2_NM_001160292_utr3_0_0_chr2_6539699_r,Celf2_NM_001160293_utr3_0_0_chr2_6539699_r,Celf2_NM_001310447_utr3_0_0_chr2_6539699_r,Celf2_NM_001347094_utr3_0_0_chr2_6539699_r,Celf2_NM_010…	20	-	7387	28	2	0.00447933	0.000586
chr2	6544409	6544410	Celf2_NM_001110228_utr3_0_0_chr2_6539699_r,Celf2_NM_001110229_utr3_0_0_chr2_6539699_r,Celf2_NM_001110230_utr3_0_0_chr2_6539699_r,Celf2_NM_001110231_utr3_0_0_chr2_6539699_r,Celf2_NM_001110232_utr3_0_0_chr2_6539699_r,Celf2_NM_001160292_utr3_0_0_chr2_6539699_r,Celf2_NM_001160293_utr3_0_0_chr2_6539699_r,Celf2_NM_001310447_utr3_0_0_chr2_6539699_r,Celf2_NM_001347094_utr3_0_0_chr2_6539699_r,Celf2_NM_010…	7	-	7387	7	1	0.00447933	0.00169
chr2	6544414	6544415	Celf2_NM_001110228_utr3_0_0_chr2_6539699_r,Celf2_NM_001110229_utr3_0_0_chr2_6539699_r,Celf2_NM_001110230_utr3_0_0_chr2_6539699_r,Celf2_NM_001110231_utr3_0_0_chr2_6539699_r,Celf2_NM_001110232_utr3_0_0_chr2_6539699_r,Celf2_NM_001160292_utr3_0_0_chr2_6539699_r,Celf2_NM_001160293_utr3_0_0_chr2_6539699_r,Celf2_NM_001310447_utr3_0_0_chr2_6539699_r,Celf2_NM_001347094_utr3_0_0_chr2_6539699_r,Celf2_NM_010…	10	-	7387	10	1	0.00447933	0.00098
chr2	6544468	6544469	Celf2_NM_001110228_utr3_0_0_chr2_6539699_r,Celf2_NM_001110229_utr3_0_0_chr2_6539699_r,Celf2_NM_001110230_utr3_0_0_chr2_6539699_r,Celf2_NM_001110231_utr3_0_0_chr2_6539699_r,Celf2_NM_001110232_utr3_0_0_chr2_6539699_r,Celf2_NM_001160292_utr3_0_0_chr2_6539699_r,Celf2_NM_001160293_utr3_0_0_chr2_6539699_r,Celf2_NM_001310447_utr3_0_0_chr2_6539699_r,Celf2_NM_001347094_utr3_0_0_chr2_6539699_r,Celf2_NM_010…	14	-	7387	14	1	0.00447933	0.00109
chr2	6544516	6544517	Celf2_NM_001110228_utr3_0_0_chr2_6539699_r,Celf2_NM_001110229_utr3_0_0_chr2_6539699_r,Celf2_NM_001110230_utr3_0_0_chr2_6539699_r,Celf2_NM_001110231_utr3_0_0_chr2_6539699_r,Celf2_NM_001110232_utr3_0_0_chr2_6539699_r,Celf2_NM_001160292_utr3_0_0_chr2_6539699_r,Celf2_NM_001160293_utr3_0_0_chr2_6539699_r,Celf2_NM_001310447_utr3_0_0_chr2_6539699_r,Celf2_NM_001347094_utr3_0_0_chr2_6539699_r,Celf2_NM_010…	8	-	7387	8	1	0.00447933	0.000358
chr2	6544660	6544661	Celf2_NM_001110228_utr3_0_0_chr2_6539699_r,Celf2_NM_001110229_utr3_0_0_chr2_6539699_r,Celf2_NM_001110230_utr3_0_0_chr2_6539699_r,Celf2_NM_001110231_utr3_0_0_chr2_6539699_r,Celf2_NM_001110232_utr3_0_0_chr2_6539699_r,Celf2_NM_001160292_utr3_0_0_chr2_6539699_r,Celf2_NM_001160293_utr3_0_0_chr2_6539699_r,Celf2_NM_001310447_utr3_0_0_chr2_6539699_r,Celf2_NM_001347094_utr3_0_0_chr2_6539699_r,Celf2_NM_010…	9	-	7387	9	1	0.00447933	0.000491
chr2	6544666	6544667	Celf2_NM_001110228_utr3_0_0_chr2_6539699_r,Celf2_NM_001110229_utr3_0_0_chr2_6539699_r,Celf2_NM_001110230_utr3_0_0_chr2_6539699_r,Celf2_NM_001110231_utr3_0_0_chr2_6539699_r,Celf2_NM_001110232_utr3_0_0_chr2_6539699_r,Celf2_NM_001160292_utr3_0_0_chr2_6539699_r,Celf2_NM_001160293_utr3_0_0_chr2_6539699_r,Celf2_NM_001310447_utr3_0_0_chr2_6539699_r,Celf2_NM_001347094_utr3_0_0_chr2_6539699_r,Celf2_NM_010…	5	-	7387	5	1	0.00447933	0.00109
chr2	6544689	6544690	Celf2_NM_001110228_utr3_0_0_chr2_6539699_r,Celf2_NM_001110229_utr3_0_0_chr2_6539699_r,Celf2_NM_001110230_utr3_0_0_chr2_6539699_r,Celf2_NM_001110231_utr3_0_0_chr2_6539699_r,Celf2_NM_001110232_utr3_0_0_chr2_6539699_r,Celf2_NM_001160292_utr3_0_0_chr2_6539699_r,Celf2_NM_001160293_utr3_0_0_chr2_6539699_r,Celf2_NM_001310447_utr3_0_0_chr2_6539699_r,Celf2_NM_001347094_utr3_0_0_chr2_6539699_r,Celf2_NM_010…	13	-	7387	13	1	0.00447933	0.00169
chr2	6544726	6544727	Celf2_NM_001110228_utr3_0_0_chr2_6539699_r,Celf2_NM_001110229_utr3_0_0_chr2_6539699_r,Celf2_NM_001110230_utr3_0_0_chr2_6539699_r,Celf2_NM_001110231_utr3_0_0_chr2_6539699_r,Celf2_NM_001110232_utr3_0_0_chr2_6539699_r,Celf2_NM_001160292_utr3_0_0_chr2_6539699_r,Celf2_NM_001160293_utr3_0_0_chr2_6539699_r,Celf2_NM_001310447_utr3_0_0_chr2_6539699_r,Celf2_NM_001347094_utr3_0_0_chr2_6539699_r,Celf2_NM_010…	15	-	7387	26	1	0.00447933	0.000115
chr2	6544782	6544783	Celf2_NM_001110228_utr3_0_0_chr2_6539699_r,Celf2_NM_001110229_utr3_0_0_chr2_6539699_r,Celf2_NM_001110230_utr3_0_0_chr2_6539699_r,Celf2_NM_001110231_utr3_0_0_chr2_6539699_r,Celf2_NM_001110232_utr3_0_0_chr2_6539699_r,Celf2_NM_001160292_utr3_0_0_chr2_6539699_r,Celf2_NM_001160293_utr3_0_0_chr2_6539699_r,Celf2_NM_001310447_utr3_0_0_chr2_6539699_r,Celf2_NM_001347094_utr3_0_0_chr2_6539699_r,Celf2_NM_010…	39	-	7387	39	1	0.00447933	9.67e-05
chr2	6544786	6544787	Celf2_NM_001110228_utr3_0_0_chr2_6539699_r,Celf2_NM_001110229_utr3_0_0_chr2_6539699_r,Celf2_NM_001110230_utr3_0_0_chr2_6539699_r,Celf2_NM_001110231_utr3_0_0_chr2_6539699_r,Celf2_NM_001110232_utr3_0_0_chr2_6539699_r,Celf2_NM_001160292_utr3_0_0_chr2_6539699_r,Celf2_NM_001160293_utr3_0_0_chr2_6539699_r,Celf2_NM_001310447_utr3_0_0_chr2_6539699_r,Celf2_NM_001347094_utr3_0_0_chr2_6539699_r,Celf2_NM_010…	6	-	7387	6	1	0.00447933	0.00169
chr2	6544818	6544819	Celf2_NM_001110228_utr3_0_0_chr2_6539699_r,Celf2_NM_001110229_utr3_0_0_chr2_6539699_r,Celf2_NM_001110230_utr3_0_0_chr2_6539699_r,Celf2_NM_001110231_utr3_0_0_chr2_6539699_r,Celf2_NM_001110232_utr3_0_0_chr2_6539699_r,Celf2_NM_001160292_utr3_0_0_chr2_6539699_r,Celf2_NM_001160293_utr3_0_0_chr2_6539699_r,Celf2_NM_001310447_utr3_0_0_chr2_6539699_r,Celf2_NM_001347094_utr3_0_0_chr2_6539699_r,Celf2_NM_010…	4	-	7387	4	1	0.00447933	0.00169
chr2	6544846	6544847	Celf2_NM_001110228_utr3_0_0_chr2_6539699_r,Celf2_NM_001110229_utr3_0_0_chr2_6539699_r,Celf2_NM_001110230_utr3_0_0_chr2_6539699_r,Celf2_NM_001110231_utr3_0_0_chr2_6539699_r,Celf2_NM_001110232_utr3_0_0_chr2_6539699_r,Celf2_NM_001160292_utr3_0_0_chr2_6539699_r,Celf2_NM_001160293_utr3_0_0_chr2_6539699_r,Celf2_NM_001310447_utr3_0_0_chr2_6539699_r,Celf2_NM_001347094_utr3_0_0_chr2_6539699_r,Celf2_NM_010…	16	-	7387	81	1	0.00447933	0.000222
chr2	6544876	6544877	Celf2_NM_001110228_utr3_0_0_chr2_6539699_r,Celf2_NM_001110229_utr3_0_0_chr2_6539699_r,Celf2_NM_001110230_utr3_0_0_chr2_6539699_r,Celf2_NM_001110231_utr3_0_0_chr2_6539699_r,Celf2_NM_001110232_utr3_0_0_chr2_6539699_r,Celf2_NM_001160292_utr3_0_0_chr2_6539699_r,Celf2_NM_001160293_utr3_0_0_chr2_6539699_r,Celf2_NM_001310447_utr3_0_0_chr2_6539699_r,Celf2_NM_001347094_utr3_0_0_chr2_6539699_r,Celf2_NM_010…	7	-	7387	7	1	0.00447933	0.00169
chr2	6545028	6545029	Celf2_NM_001110228_utr3_0_0_chr2_6539699_r,Celf2_NM_001110229_utr3_0_0_chr2_6539699_r,Celf2_NM_001110230_utr3_0_0_chr2_6539699_r,Celf2_NM_001110231_utr3_0_0_chr2_6539699_r,Celf2_NM_001110232_utr3_0_0_chr2_6539699_r,Celf2_NM_001160292_utr3_0_0_chr2_6539699_r,Celf2_NM_001160293_utr3_0_0_chr2_6539699_r,Celf2_NM_001310447_utr3_0_0_chr2_6539699_r,Celf2_NM_001347094_utr3_0_0_chr2_6539699_r,Celf2_NM_010…	4	-	7387	4	1	0.00447933	0.00169
chr2	6545172	6545173	Celf2_NM_001110228_utr3_0_0_chr2_6539699_r,Celf2_NM_001110229_utr3_0_0_chr2_6539699_r,Celf2_NM_001110230_utr3_0_0_chr2_6539699_r,Celf2_NM_001110231_utr3_0_0_chr2_6539699_r,Celf2_NM_001110232_utr3_0_0_chr2_6539699_r,Celf2_NM_001160292_utr3_0_0_chr2_6539699_r,Celf2_NM_001160293_utr3_0_0_chr2_6539699_r,Celf2_NM_001310447_utr3_0_0_chr2_6539699_r,Celf2_NM_001347094_utr3_0_0_chr2_6539699_r,Celf2_NM_010…	6	-	7387	11	1	0.00447933	0.00169
chr5	30674236	30674237	Cenpa_NM_001302129_utr3_5_0_chr5_30674038_f,Cenpa_NM_001302130_utr3_6_0_chr5_30674038_f,Cenpa_NM_001302131_utr3_6_0_chr5_30674038_f,Cenpa_NM_001302132_utr3_3_0_chr5_30674113_f,Cenpa_NM_007681_utr3_4_0_chr5_30674038_f	10	+	800	10	1	0	0.00192
chr5	30674310	30674311	Cenpa_NM_001302129_utr3_5_0_chr5_30674038_f,Cenpa_NM_001302130_utr3_6_0_chr5_30674038_f,Cenpa_NM_001302131_utr3_6_0_chr5_30674038_f,Cenpa_NM_001302132_utr3_3_0_chr5_30674113_f,Cenpa_NM_007681_utr3_4_0_chr5_30674038_f	5	+	800	5	1	0	0.00965
chr5	30674320	30674321	Cenpa_NM_001302129_utr3_5_0_chr5_30674038_f,Cenpa_NM_001302130_utr3_6_0_chr5_30674038_f,Cenpa_NM_001302131_utr3_6_0_chr5_30674038_f,Cenpa_NM_001302132_utr3_3_0_chr5_30674113_f,Cenpa_NM_007681_utr3_4_0_chr5_30674038_f	7	+	800	7	1	0	0.00965
chr5	30674330	30674331	Cenpa_NM_001302129_utr3_5_0_chr5_30674038_f,Cenpa_NM_001302130_utr3_6_0_chr5_30674038_f,Cenpa_NM_001302131_utr3_6_0_chr5_30674038_f,Cenpa_NM_001302132_utr3_3_0_chr5_30674113_f,Cenpa_NM_007681_utr3_4_0_chr5_30674038_f	7	+	800	11	1	0	0.00385
chr5	86012052	86012053	Cenpc1_NM_001345902_utr3_0_0_chr5_86012025_r,Cenpc1_NM_001345903_utr3_0_0_chr5_86012025_r,Cenpc1_NM_001345904_utr3_0_0_chr5_86012025_r,Cenpc1_NM_007683_utr3_0_0_chr5_86012025_r	4	-	232	12	1	0	0.00472
chr5	86012054	86012055	Cenpc1_NM_001345902_utr3_0_0_chr5_86012025_r,Cenpc1_NM_001345903_utr3_0_0_chr5_86012025_r,Cenpc1_NM_001345904_utr3_0_0_chr5_86012025_r,Cenpc1_NM_007683_utr3_0_0_chr5_86012025_r	5	-	232	12	1	0	0.00421
chr1	189642019	189642020	Cenpf_NM_001081363_utr3_0_0_chr1_189640614_r	4	-	1985	4	1	0.0222993	0.00148
chr1	189642063	189642064	Cenpf_NM_001081363_utr3_0_0_chr1_189640614_r	8	-	1985	16	1	0.0222993	5.99e-05
chr1	189642095	189642096	Cenpf_NM_001081363_utr3_0_0_chr1_189640614_r	10	-	1985	15	1	0.0222993	0.000875
chr1	189642177	189642178	Cenpf_NM_001081363_utr3_0_0_chr1_189640614_r	6	-	1985	6	1	0.0222993	0.000851
chr17	40923102	40923104	Cenpq_NM_031863_utr3_0_0_chr17_40923055_r	9	-	433	10	2	0	0.00224
chr1	176733729	176733730	Cep170_NM_001099637_utr3_0_0_chr1_176733653_r	5	-	2027	5	1	0	0.00447
chr1	176734735	176734736	Cep170_NM_001099637_utr3_0_0_chr1_176733653_r	8	-	2027	13	1	0	0.0013
chr19	38074049	38074050	Cep55_NM_001164362_utr3_9_0_chr19_38073499_f,Cep55_NM_028293_utr3_8_0_chr19_38073499_f,Cep55_NM_028760_utr3_9_0_chr19_38073499_f	5	+	927	8	1	0.0579504	0.000853
chr19	38074054	38074055	Cep55_NM_001164362_utr3_9_0_chr19_38073499_f,Cep55_NM_028293_utr3_8_0_chr19_38073499_f,Cep55_NM_028760_utr3_9_0_chr19_38073499_f	9	+	927	9	1	0.0579504	0.000542
chr13	74037893	74037894	Cep72_NM_028959_utr3_0_0_chr13_74036495_r	7	-	1668	7	1	0	0.000855
chr4	134129888	134129889	Cep85_NM_144527_utr3_0_0_chr4_134129858_r	32	-	1421	32	1	0	0.00829
chr4	134129901	134129902	Cep85_NM_144527_utr3_0_0_chr4_134129858_r	24	-	1421	24	1	0	0.00676
chr4	134129913	134129914	Cep85_NM_144527_utr3_0_0_chr4_134129858_r	52	-	1421	52	1	0	0.00595
chr4	134129932	134129933	Cep85_NM_144527_utr3_0_0_chr4_134129858_r	43	-	1421	43	1	0	0.00197
chr4	134130321	134130322	Cep85_NM_144527_utr3_0_0_chr4_134129858_r	41	-	1421	66	1	0	0.00609
chr4	134130327	134130328	Cep85_NM_144527_utr3_0_0_chr4_134129858_r	24	-	1421	24	1	0	0.00829
chr4	134130354	134130355	Cep85_NM_144527_utr3_0_0_chr4_134129858_r	41	-	1421	41	1	0	0.00829
chr4	134130360	134130362	Cep85_NM_144527_utr3_0_0_chr4_134129858_r	78	-	1421	134	2	0	9.27e-05
chr4	134131101	134131102	Cep85_NM_144527_utr3_0_0_chr4_134129858_r	34	-	1421	34	1	0	0.00745
chr3	95323555	95323556	Cers2_NM_001320492_utr3_10_0_chr3_95322790_f,Cers2_NM_029789_utr3_10_0_chr3_95322790_f	6	+	810	10	1	0	0.00148
chr2	69108611	69108612	Cers6_NM_001347161_utr3_10_0_chr2_69108595_f,Cers6_NM_172856_utr3_9_0_chr2_69108595_f	12	+	5689	12	1	0.0381438	0.000634
chr2	69113804	69113805	Cers6_NM_001347161_utr3_10_0_chr2_69108595_f,Cers6_NM_172856_utr3_9_0_chr2_69108595_f	7	+	5689	13	1	0.0381438	0.00162
chr2	69113842	69113843	Cers6_NM_001347161_utr3_10_0_chr2_69108595_f,Cers6_NM_172856_utr3_9_0_chr2_69108595_f	6	+	5689	6	1	0.0381438	0.00134
chrX	72913745	72913746	Cetn2_NM_019405_utr3_0_0_chrX_72913565_r	7	-	639	7	1	0	0.00719
chrX	72913763	72913764	Cetn2_NM_019405_utr3_0_0_chrX_72913565_r	5	-	639	5	1	0	0.00854
chrX	72913825	72913826	Cetn2_NM_019405_utr3_0_0_chrX_72913565_r	8	-	639	8	1	0	0.00797
chr13	81796833	81796834	Cetn3_NM_007684_utr3_4_0_chr13_81796698_f	15	+	460	15	1	0	0.00969
chr13	81796844	81796845	Cetn3_NM_007684_utr3_4_0_chr13_81796698_f	27	+	460	27	1	0	0.00318
chr13	81796848	81796849	Cetn3_NM_007684_utr3_4_0_chr13_81796698_f	54	+	460	54	1	0	0.0015
chr13	81796893	81796894	Cetn3_NM_007684_utr3_4_0_chr13_81796698_f	30	+	460	30	1	0	0.00318
chr8	111768558	111768559	Cfdp1_NM_011801_utr3_0_0_chr8_111768473_r	10	-	224	10	1	0	0.00482
chr12	54861007	54861008	Cfl2_NM_007688_utr3_0_0_chr12_54858819_r	13	-	2306	13	1	0	0.000317
chr8	13880372	13880373	Champ1_NM_181854_utr3_1_0_chr8_13880253_f	17	+	1387	17	1	0.0650612	0.000673
chr8	13880399	13880400	Champ1_NM_181854_utr3_1_0_chr8_13880253_f	11	+	1387	11	1	0.0650612	8.86e-05
chr8	13880434	13880435	Champ1_NM_181854_utr3_1_0_chr8_13880253_f	4	+	1387	4	1	0.0650612	0.00141
chr8	13880457	13880458	Champ1_NM_181854_utr3_1_0_chr8_13880253_f	7	+	1387	7	1	0.0650612	0.000893
chr8	13880505	13880507	Champ1_NM_181854_utr3_1_0_chr8_13880253_f	22	+	1387	27	2	0.0650612	1.31e-05
chr8	13880684	13880685	Champ1_NM_181854_utr3_1_0_chr8_13880253_f	8	+	1387	17	1	0.0650612	0.000284
chr8	13880804	13880805	Champ1_NM_181854_utr3_1_0_chr8_13880253_f	6	+	1387	11	1	0.0650612	0.000584
chr5	129881231	129881232	Chchd2_NM_024166_utr3_0_0_chr5_129881161_r	54	-	225	78	1	0	0.00133
chr6	91464411	91464412	Chchd4_NM_133928_utr3_0_0_chr6_91464276_r	14	-	739	14	1	0	0.00224
chr6	91464419	91464420	Chchd4_NM_133928_utr3_0_0_chr6_91464276_r	8	-	739	8	1	0	0.00712
chr6	125130284	125130285	Chd4_NM_001346610_utr3_38_0_chr6_125130002_f,Chd4_NM_145979_utr3_38_0_chr6_125130002_f	9	+	590	16	1	0.10744	0.00031
chr6	125130382	125130383	Chd4_NM_001346610_utr3_38_0_chr6_125130002_f,Chd4_NM_145979_utr3_38_0_chr6_125130002_f	8	+	590	8	1	0.10744	0.00031
chr2	160947889	160947890	Chd6_NM_173368_utr3_0_0_chr2_160946978_r	8	-	2322	8	1	0	0.00682
chr2	160947906	160947907	Chd6_NM_173368_utr3_0_0_chr2_160946978_r	16	-	2322	16	1	0	0.000175
chr2	160947944	160947945	Chd6_NM_173368_utr3_0_0_chr2_160946978_r	5	-	2322	5	1	0	0.00498
chr2	160947959	160947960	Chd6_NM_173368_utr3_0_0_chr2_160946978_r	5	-	2322	5	1	0	0.00827
chr2	160948007	160948008	Chd6_NM_173368_utr3_0_0_chr2_160946978_r	4	-	2322	4	1	0	0.00827
chr2	160949150	160949151	Chd6_NM_173368_utr3_0_0_chr2_160946978_r	10	-	2322	10	1	0	0.0049
chr4	8866732	8866733	Chd7_NM_001277149_utr3_37_0_chr4_8866656_f,Chd7_NM_001355382_utr3_36_0_chr4_8866656_f	9	+	1794	9	1	0	0.0019
chr4	8866755	8866756	Chd7_NM_001277149_utr3_37_0_chr4_8866656_f,Chd7_NM_001355382_utr3_36_0_chr4_8866656_f	9	+	1794	9	1	0	0.000371
chr8	72460513	72460514	Cherp_NM_138585_utr3_0_0_chr8_72460483_r	32	-	832	37	1	0.149739	0.000107
chr8	72460520	72460521	Cherp_NM_138585_utr3_0_0_chr8_72460483_r	10	-	832	15	1	0.149739	0.00048
chr8	72460582	72460583	Cherp_NM_138585_utr3_0_0_chr8_72460483_r	13	-	832	17	1	0.149739	8.28e-05
chr8	72460606	72460607	Cherp_NM_138585_utr3_0_0_chr8_72460483_r	8	-	832	11	1	0.149739	0.000521
chr8	72460668	72460669	Cherp_NM_138585_utr3_0_0_chr8_72460483_r	4	-	832	4	1	0.149739	0.000887
chr8	72460672	72460673	Cherp_NM_138585_utr3_0_0_chr8_72460483_r	5	-	832	5	1	0.149739	0.000908
chr8	72460977	72460980	Cherp_NM_138585_utr3_0_0_chr8_72460483_r	21	-	832	32	3	0.149739	1.14e-07
chr8	72460985	72460986	Cherp_NM_138585_utr3_0_0_chr8_72460483_r	8	-	832	15	1	0.149739	6.48e-05
chr8	72460989	72460990	Cherp_NM_138585_utr3_0_0_chr8_72460483_r	7	-	832	7	1	0.149739	0.000315
chr8	72460998	72460999	Cherp_NM_138585_utr3_0_0_chr8_72460483_r	12	-	832	12	1	0.149739	0.000549
chr8	72461054	72461055	Cherp_NM_138585_utr3_0_0_chr8_72460483_r	7	-	832	11	1	0.149739	0.000908
chr5	110171402	110171403	Chfr_NM_001289577_utr3_17_0_chr5_110170905_f,Chfr_NM_001289578_utr3_16_0_chr5_110170905_f,Chfr_NM_001289579_utr3_18_0_chr5_110170905_f,Chfr_NM_001289580_utr3_18_0_chr5_110170905_f,Chfr_NM_172717_utr3_17_0_chr5_110170905_f	6	+	1069	8	1	0.0502526	0.00069
chr5	110171415	110171416	Chfr_NM_001289577_utr3_17_0_chr5_110170905_f,Chfr_NM_001289578_utr3_16_0_chr5_110170905_f,Chfr_NM_001289579_utr3_18_0_chr5_110170905_f,Chfr_NM_001289580_utr3_18_0_chr5_110170905_f,Chfr_NM_172717_utr3_17_0_chr5_110170905_f	16	+	1069	21	1	0.0502526	0.000242
chr5	110171536	110171537	Chfr_NM_001289577_utr3_17_0_chr5_110170905_f,Chfr_NM_001289578_utr3_16_0_chr5_110170905_f,Chfr_NM_001289579_utr3_18_0_chr5_110170905_f,Chfr_NM_001289580_utr3_18_0_chr5_110170905_f,Chfr_NM_172717_utr3_17_0_chr5_110170905_f	16	+	1069	16	1	0.0502526	0.000549
chr5	110171542	110171543	Chfr_NM_001289577_utr3_17_0_chr5_110170905_f,Chfr_NM_001289578_utr3_16_0_chr5_110170905_f,Chfr_NM_001289579_utr3_18_0_chr5_110170905_f,Chfr_NM_001289580_utr3_18_0_chr5_110170905_f,Chfr_NM_172717_utr3_17_0_chr5_110170905_f	10	+	1069	10	1	0.0502526	0.00069
chr5	110171771	110171772	Chfr_NM_001289577_utr3_17_0_chr5_110170905_f,Chfr_NM_001289578_utr3_16_0_chr5_110170905_f,Chfr_NM_001289579_utr3_18_0_chr5_110170905_f,Chfr_NM_001289580_utr3_18_0_chr5_110170905_f,Chfr_NM_172717_utr3_17_0_chr5_110170905_f	7	+	1069	7	1	0.0502526	0.000835
chr5	110171818	110171819	Chfr_NM_001289577_utr3_17_0_chr5_110170905_f,Chfr_NM_001289578_utr3_16_0_chr5_110170905_f,Chfr_NM_001289579_utr3_18_0_chr5_110170905_f,Chfr_NM_001289580_utr3_18_0_chr5_110170905_f,Chfr_NM_172717_utr3_17_0_chr5_110170905_f	19	+	1069	19	1	0.0502526	7.14e-05
chr5	110171866	110171867	Chfr_NM_001289577_utr3_17_0_chr5_110170905_f,Chfr_NM_001289578_utr3_16_0_chr5_110170905_f,Chfr_NM_001289579_utr3_18_0_chr5_110170905_f,Chfr_NM_001289580_utr3_18_0_chr5_110170905_f,Chfr_NM_172717_utr3_17_0_chr5_110170905_f	5	+	1069	5	1	0.0502526	0.00106
chr5	75006451	75006452	Chic2_NM_028850_utr3_0_0_chr5_75005004_r	21	-	1709	26	1	0.0102347	0.00166
chr5	75006459	75006466	Chic2_NM_028850_utr3_0_0_chr5_75005004_r	20	-	1709	72	7	0.0102347	0.000704
chr5	75006473	75006477	Chic2_NM_028850_utr3_0_0_chr5_75005004_r	70	-	1709	107	4	0.0102347	4.56e-10
chr5	75006481	75006482	Chic2_NM_028850_utr3_0_0_chr5_75005004_r	12	-	1709	14	1	0.0102347	8.62e-05
chr5	75006485	75006486	Chic2_NM_028850_utr3_0_0_chr5_75005004_r	7	-	1709	8	1	0.0102347	0.000618
chr5	75006487	75006490	Chic2_NM_028850_utr3_0_0_chr5_75005004_r	33	-	1709	55	3	0.0102347	5.8e-05
chr5	75006505	75006508	Chic2_NM_028850_utr3_0_0_chr5_75005004_r	24	-	1709	31	3	0.0102347	2.31e-06
chr5	75006512	75006514	Chic2_NM_028850_utr3_0_0_chr5_75005004_r	6	-	1709	16	2	0.0102347	0.00045
chr5	75006517	75006520	Chic2_NM_028850_utr3_0_0_chr5_75005004_r	23	-	1709	45	3	0.0102347	2.61e-05
chr5	75006531	75006532	Chic2_NM_028850_utr3_0_0_chr5_75005004_r	20	-	1709	20	1	0.0102347	8.56e-05
chr5	75006534	75006536	Chic2_NM_028850_utr3_0_0_chr5_75005004_r	21	-	1709	25	2	0.0102347	4.08e-05
chr5	75006538	75006540	Chic2_NM_028850_utr3_0_0_chr5_75005004_r	15	-	1709	26	2	0.0102347	0.000314
chr5	75006543	75006544	Chic2_NM_028850_utr3_0_0_chr5_75005004_r	5	-	1709	9	1	0.0102347	0.00166
chr5	75006553	75006554	Chic2_NM_028850_utr3_0_0_chr5_75005004_r	15	-	1709	15	1	0.0102347	0.00106
chr5	75006567	75006569	Chic2_NM_028850_utr3_0_0_chr5_75005004_r	10	-	1709	36	2	0.0102347	0.00114
chr5	75006583	75006588	Chic2_NM_028850_utr3_0_0_chr5_75005004_r	18	-	1709	59	5	0.0102347	3.05e-06
chr5	75006591	75006592	Chic2_NM_028850_utr3_0_0_chr5_75005004_r	16	-	1709	33	1	0.0102347	0.000303
chr5	75006593	75006594	Chic2_NM_028850_utr3_0_0_chr5_75005004_r	16	-	1709	33	1	0.0102347	0.00198
chr5	75006596	75006597	Chic2_NM_028850_utr3_0_0_chr5_75005004_r	4	-	1709	4	1	0.0102347	0.00166
chr5	75006602	75006603	Chic2_NM_028850_utr3_0_0_chr5_75005004_r	4	-	1709	4	1	0.0102347	0.00198
chr5	75006699	75006700	Chic2_NM_028850_utr3_0_0_chr5_75005004_r	6	-	1709	10	1	0.0102347	0.00198
chr1	175684561	175684562	Chml_NM_021350_utr3_0_0_chr1_175682238_r	8	-	4250	8	1	0.00411555	0.000446
chr8	123204366	123204367	Chmp1a_NM_145606_utr3_0_0_chr8_123204261_r	16	-	1464	16	1	0	0.00878
chr8	123204524	123204525	Chmp1a_NM_145606_utr3_0_0_chr8_123204261_r	24	-	1464	24	1	0	0.000366
chr8	123204713	123204714	Chmp1a_NM_145606_utr3_0_0_chr8_123204261_r	13	-	1464	13	1	0	0.00451
chr18	67206615	67206616	Chmp1b_NM_024190_utr3_0_0_chr18_67206101_f	8	+	1787	8	1	0.0300616	0.00194
chr6	71581399	71581400	Chmp3_NM_001355674_utr3_5_0_chr6_71579793_f,Chmp3_NM_001355675_utr3_5_0_chr6_71579793_f,Chmp3_NM_025783_utr3_5_0_chr6_71579793_f	6	+	1787	6	1	0	0.00154
chr2	154694411	154694412	Chmp4b_NM_029362_utr3_4_0_chr2_154694009_f	14	+	775	22	1	0	0.000517
chr2	154694443	154694444	Chmp4b_NM_029362_utr3_4_0_chr2_154694009_f	7	+	775	7	1	0	0.00331
chr14	69717111	69717112	Chmp7_NM_134078_utr3_0_0_chr14_69716979_r	6	-	1269	6	1	0.0275667	0.000796
chr14	69717941	69717942	Chmp7_NM_134078_utr3_0_0_chr14_69716979_r	7	-	1269	7	1	0.0275667	0.000435
chr14	69717984	69717985	Chmp7_NM_134078_utr3_0_0_chr14_69716979_r	18	-	1269	18	1	0.0275667	0.000435
chr14	69717999	69718000	Chmp7_NM_134078_utr3_0_0_chr14_69716979_r	7	-	1269	7	1	0.0275667	0.000473
chr14	69718178	69718179	Chmp7_NM_134078_utr3_0_0_chr14_69716979_r	13	-	1269	13	1	0.0275667	3.8e-05
chr2	73612366	73612367	Chn1_NM_001113246_utr3_0_0_chr2_73610660_r,Chn1_NM_001166603_utr3_0_0_chr2_73610660_r,Chn1_NM_001166604_utr3_0_0_chr2_73610660_r,Chn1_NM_029716_utr3_0_0_chr2_73610660_r,Chn1_NM_175752_utr3_0_0_chr2_73610660_r	6	-	2365	6	1	0	0.00148
chr2	73612925	73612926	Chn1_NM_001113246_utr3_0_0_chr2_73610660_r,Chn1_NM_001166603_utr3_0_0_chr2_73610660_r,Chn1_NM_001166604_utr3_0_0_chr2_73610660_r,Chn1_NM_029716_utr3_0_0_chr2_73610660_r,Chn1_NM_175752_utr3_0_0_chr2_73610660_r	6	-	2365	6	1	0	0.000594
chr9	18313042	18313043	Chordc1_NM_025844_utr3_10_0_chr9_18312922_f	7	+	1079	7	1	0	0.00233
chr9	18313225	18313226	Chordc1_NM_025844_utr3_10_0_chr9_18312922_f	7	+	1079	7	1	0	0.00676
chr2	119586991	119586992	Chp1_NM_019769_utr3_6_0_chr2_119585161_f	5	+	1862	5	1	0	0.00086
chr7	66173452	66173453	Chsy1_NM_001081163_utr3_2_0_chr7_66172422_f	5	+	1377	9	1	0	0.00535
chr3	90498986	90498987	Chtop_NM_001293776_utr3_0_0_chr3_90498539_r,Chtop_NM_001293777_utr3_0_0_chr3_90498539_r,Chtop_NM_001293778_utr3_0_0_chr3_90498539_r,Chtop_NM_001293779_utr3_0_0_chr3_90498539_r,Chtop_NM_001293780_utr3_0_0_chr3_90498539_r,Chtop_NM_001293781_utr3_0_0_chr3_90498539_r,Chtop_NM_001293782_utr3_0_0_chr3_90498539_r,Chtop_NM_023215_utr3_0_0_chr3_90498539_r	31	-	1363	38	1	0.0128328	2.89e-05
chr3	90499431	90499432	Chtop_NM_001293776_utr3_0_0_chr3_90498539_r,Chtop_NM_001293777_utr3_0_0_chr3_90498539_r,Chtop_NM_001293778_utr3_0_0_chr3_90498539_r,Chtop_NM_001293779_utr3_0_0_chr3_90498539_r,Chtop_NM_001293780_utr3_0_0_chr3_90498539_r,Chtop_NM_001293781_utr3_0_0_chr3_90498539_r,Chtop_NM_001293782_utr3_0_0_chr3_90498539_r,Chtop_NM_023215_utr3_0_0_chr3_90498539_r	5	-	1363	5	1	0.0128328	0.00163
chr3	90499546	90499549	Chtop_NM_001293776_utr3_0_0_chr3_90498539_r,Chtop_NM_001293777_utr3_0_0_chr3_90498539_r,Chtop_NM_001293778_utr3_0_0_chr3_90498539_r,Chtop_NM_001293779_utr3_0_0_chr3_90498539_r,Chtop_NM_001293780_utr3_0_0_chr3_90498539_r,Chtop_NM_001293781_utr3_0_0_chr3_90498539_r,Chtop_NM_001293782_utr3_0_0_chr3_90498539_r,Chtop_NM_023215_utr3_0_0_chr3_90498539_r	9	-	1363	23	3	0.0128328	0.00142
chr3	90499570	90499574	Chtop_NM_001293776_utr3_0_0_chr3_90498539_r,Chtop_NM_001293777_utr3_0_0_chr3_90498539_r,Chtop_NM_001293778_utr3_0_0_chr3_90498539_r,Chtop_NM_001293779_utr3_0_0_chr3_90498539_r,Chtop_NM_001293780_utr3_0_0_chr3_90498539_r,Chtop_NM_001293781_utr3_0_0_chr3_90498539_r,Chtop_NM_001293782_utr3_0_0_chr3_90498539_r,Chtop_NM_023215_utr3_0_0_chr3_90498539_r	16	-	1363	25	4	0.0128328	5.85e-05
chr3	90499668	90499669	Chtop_NM_001293776_utr3_0_0_chr3_90498539_r,Chtop_NM_001293777_utr3_0_0_chr3_90498539_r,Chtop_NM_001293778_utr3_0_0_chr3_90498539_r,Chtop_NM_001293779_utr3_0_0_chr3_90498539_r,Chtop_NM_001293780_utr3_0_0_chr3_90498539_r,Chtop_NM_001293781_utr3_0_0_chr3_90498539_r,Chtop_NM_001293782_utr3_0_0_chr3_90498539_r,Chtop_NM_023215_utr3_0_0_chr3_90498539_r	30	-	1363	30	1	0.0128328	1.31e-05
chr3	90499670	90499671	Chtop_NM_001293776_utr3_0_0_chr3_90498539_r,Chtop_NM_001293777_utr3_0_0_chr3_90498539_r,Chtop_NM_001293778_utr3_0_0_chr3_90498539_r,Chtop_NM_001293779_utr3_0_0_chr3_90498539_r,Chtop_NM_001293780_utr3_0_0_chr3_90498539_r,Chtop_NM_001293781_utr3_0_0_chr3_90498539_r,Chtop_NM_001293782_utr3_0_0_chr3_90498539_r,Chtop_NM_023215_utr3_0_0_chr3_90498539_r	12	-	1363	30	1	0.0128328	0.000891
chr3	90499673	90499674	Chtop_NM_001293776_utr3_0_0_chr3_90498539_r,Chtop_NM_001293777_utr3_0_0_chr3_90498539_r,Chtop_NM_001293778_utr3_0_0_chr3_90498539_r,Chtop_NM_001293779_utr3_0_0_chr3_90498539_r,Chtop_NM_001293780_utr3_0_0_chr3_90498539_r,Chtop_NM_001293781_utr3_0_0_chr3_90498539_r,Chtop_NM_001293782_utr3_0_0_chr3_90498539_r,Chtop_NM_023215_utr3_0_0_chr3_90498539_r	12	-	1363	30	1	0.0128328	0.00142
chr3	90499675	90499678	Chtop_NM_001293776_utr3_0_0_chr3_90498539_r,Chtop_NM_001293777_utr3_0_0_chr3_90498539_r,Chtop_NM_001293778_utr3_0_0_chr3_90498539_r,Chtop_NM_001293779_utr3_0_0_chr3_90498539_r,Chtop_NM_001293780_utr3_0_0_chr3_90498539_r,Chtop_NM_001293781_utr3_0_0_chr3_90498539_r,Chtop_NM_001293782_utr3_0_0_chr3_90498539_r,Chtop_NM_023215_utr3_0_0_chr3_90498539_r	31	-	1363	76	3	0.0128328	3.8e-05
chr3	90499679	90499681	Chtop_NM_001293776_utr3_0_0_chr3_90498539_r,Chtop_NM_001293777_utr3_0_0_chr3_90498539_r,Chtop_NM_001293778_utr3_0_0_chr3_90498539_r,Chtop_NM_001293779_utr3_0_0_chr3_90498539_r,Chtop_NM_001293780_utr3_0_0_chr3_90498539_r,Chtop_NM_001293781_utr3_0_0_chr3_90498539_r,Chtop_NM_001293782_utr3_0_0_chr3_90498539_r,Chtop_NM_023215_utr3_0_0_chr3_90498539_r	24	-	1363	76	2	0.0128328	5.42e-05
chr3	90499758	90499759	Chtop_NM_001293776_utr3_0_0_chr3_90498539_r,Chtop_NM_001293777_utr3_0_0_chr3_90498539_r,Chtop_NM_001293778_utr3_0_0_chr3_90498539_r,Chtop_NM_001293779_utr3_0_0_chr3_90498539_r,Chtop_NM_001293780_utr3_0_0_chr3_90498539_r,Chtop_NM_001293781_utr3_0_0_chr3_90498539_r,Chtop_NM_001293782_utr3_0_0_chr3_90498539_r,Chtop_NM_023215_utr3_0_0_chr3_90498539_r	5	-	1363	5	1	0.0128328	0.00142
chr19	44073408	44073409	Chuk_NM_001162410_utr3_0_0_chr19_44073334_r,Chuk_NM_007700_utr3_0_0_chr19_44073334_r	6	-	1207	6	1	0	0.00726
chr19	44073731	44073732	Chuk_NM_001162410_utr3_0_0_chr19_44073334_r,Chuk_NM_007700_utr3_0_0_chr19_44073334_r	6	-	1207	6	1	0	0.00422
chr19	44073751	44073752	Chuk_NM_001162410_utr3_0_0_chr19_44073334_r,Chuk_NM_007700_utr3_0_0_chr19_44073334_r	9	-	1207	11	1	0	0.00123
chr19	44073799	44073800	Chuk_NM_001162410_utr3_0_0_chr19_44073334_r,Chuk_NM_007700_utr3_0_0_chr19_44073334_r	5	-	1207	5	1	0	0.00708
chr2	127242597	127242598	Ciao1_NM_025296_utr3_0_0_chr2_127240938_r	13	-	1859	13	1	0.0902497	0.000551
chr2	127242622	127242623	Ciao1_NM_025296_utr3_0_0_chr2_127240938_r	6	-	1859	6	1	0.0902497	0.000876
chr8	94822591	94822593	Ciapin1_NM_134141_utr3_0_0_chr8_94819818_r	20	-	3279	32	2	0	0.000968
chr8	94822633	94822635	Ciapin1_NM_134141_utr3_0_0_chr8_94819818_r	10	-	3279	21	2	0	0.000759
chr8	94822838	94822839	Ciapin1_NM_134141_utr3_0_0_chr8_94819818_r	6	-	3279	6	1	0	0.00186
chr8	94822884	94822885	Ciapin1_NM_134141_utr3_0_0_chr8_94819818_r	7	-	3279	7	1	0	0.00186
chr7	80227189	80227190	Cib1_NM_001291275_utr3_0_0_chr7_80227156_r,Cib1_NM_001291276_utr3_0_0_chr7_80227156_r,Cib1_NM_011870_utr3_0_0_chr7_80227156_r	4	-	209	4	1	0.167379	0.000852
chr10	80171035	80171038	Cirbp_NM_007705_utr3_6_0_chr10_80170999_f	12	+	655	23	3	0.111511	2.6e-06
chr10	80171061	80171062	Cirbp_NM_007705_utr3_6_0_chr10_80170999_f	5	+	655	5	1	0.111511	0.00104
chr10	80171081	80171082	Cirbp_NM_007705_utr3_6_0_chr10_80170999_f	8	+	655	8	1	0.111511	0.000394
chr10	80171089	80171091	Cirbp_NM_007705_utr3_6_0_chr10_80170999_f	27	+	655	39	2	0.111511	2.09e-06
chr10	80171100	80171102	Cirbp_NM_007705_utr3_6_0_chr10_80170999_f	8	+	655	21	2	0.111511	0.000757
chr10	80171105	80171107	Cirbp_NM_007705_utr3_6_0_chr10_80170999_f	23	+	655	31	2	0.111511	4.59e-06
chr10	80171126	80171129	Cirbp_NM_007705_utr3_6_0_chr10_80170999_f	16	+	655	45	3	0.111511	0.000142
chr10	80171160	80171162	Cirbp_NM_007705_utr3_6_0_chr10_80170999_f	24	+	655	58	2	0.111511	4.37e-06
chr10	80171163	80171165	Cirbp_NM_007705_utr3_6_0_chr10_80170999_f	24	+	655	58	2	0.111511	5.42e-05
chr10	80171203	80171205	Cirbp_NM_007705_utr3_6_0_chr10_80170999_f	9	+	655	17	2	0.111511	0.000757
chr10	80171222	80171226	Cirbp_NM_007705_utr3_6_0_chr10_80170999_f	24	+	655	69	4	0.111511	1.35e-05
chr10	80171253	80171256	Cirbp_NM_007705_utr3_6_0_chr10_80170999_f	21	+	655	36	3	0.111511	0.000469
chr10	80171257	80171259	Cirbp_NM_007705_utr3_6_0_chr10_80170999_f	32	+	655	38	2	0.111511	1.85e-05
chr10	80171282	80171283	Cirbp_NM_007705_utr3_6_0_chr10_80170999_f	17	+	655	22	1	0.111511	0.000862
chr10	80171288	80171290	Cirbp_NM_007705_utr3_6_0_chr10_80170999_f	13	+	655	23	2	0.111511	0.000128
chr10	80171295	80171296	Cirbp_NM_007705_utr3_6_0_chr10_80170999_f	21	+	655	40	1	0.111511	3.19e-05
chr10	80171297	80171298	Cirbp_NM_007705_utr3_6_0_chr10_80170999_f	21	+	655	40	1	0.111511	0.000757
chr10	80171300	80171302	Cirbp_NM_007705_utr3_6_0_chr10_80170999_f	23	+	655	55	2	0.111511	0.000757
chr10	80171304	80171306	Cirbp_NM_007705_utr3_6_0_chr10_80170999_f	43	+	655	55	2	0.111511	3.63e-08
chr10	80171311	80171316	Cirbp_NM_007705_utr3_6_0_chr10_80170999_f	27	+	655	65	5	0.111511	0.000469
chr10	80171328	80171331	Cirbp_NM_007705_utr3_6_0_chr10_80170999_f	13	+	655	62	3	0.111511	0.000757
chr10	80171332	80171333	Cirbp_NM_007705_utr3_6_0_chr10_80170999_f	12	+	655	62	1	0.111511	3.14e-05
chr10	80171334	80171348	Cirbp_NM_007705_utr3_6_0_chr10_80170999_f	43	+	655	190	14	0.111511	0.000299
chr10	80171524	80171528	Cirbp_NM_007705_utr3_6_0_chr10_80170999_f	19	+	655	43	4	0.111511	1.77e-05
chr10	80171529	80171532	Cirbp_NM_007705_utr3_6_0_chr10_80170999_f	34	+	655	53	3	0.111511	2.69e-05
chr10	80171542	80171545	Cirbp_NM_007705_utr3_6_0_chr10_80170999_f	30	+	655	43	3	0.111511	0.000195
chr10	80171546	80171547	Cirbp_NM_007705_utr3_6_0_chr10_80170999_f	30	+	655	43	1	0.111511	9.76e-06
chr10	80171579	80171580	Cirbp_NM_007705_utr3_6_0_chr10_80170999_f	11	+	655	11	1	0.111511	0.000862
chr10	80171597	80171599	Cirbp_NM_007705_utr3_6_0_chr10_80170999_f	13	+	655	31	2	0.111511	0.000469
chr10	80171600	80171601	Cirbp_NM_007705_utr3_6_0_chr10_80170999_f	11	+	655	31	1	0.111511	0.000153
chr10	80171603	80171604	Cirbp_NM_007705_utr3_6_0_chr10_80170999_f	18	+	655	18	1	0.111511	0.000117
chr10	80171611	80171612	Cirbp_NM_007705_utr3_6_0_chr10_80170999_f	38	+	655	59	1	0.111511	3.03e-06
chr10	80171633	80171634	Cirbp_NM_007705_utr3_6_0_chr10_80170999_f	9	+	655	9	1	0.111511	0.000309
chr10	17725471	17725472	Cited2_NM_010828_utr3_1_0_chr10_17724756_f	6	+	919	6	1	0	0.00655
chr2	32378244	32378245	Ciz1_NM_001252534_utr3_17_0_chr2_32378171_f,Ciz1_NM_001252536_utr3_18_0_chr2_32378171_f,Ciz1_NM_001252537_utr3_17_0_chr2_32378171_f,Ciz1_NM_001252538_utr3_17_0_chr2_32378171_f,Ciz1_NM_028412_utr3_16_0_chr2_32378171_f	5	+	143	5	1	0.255384	0.00103
chr8	22168479	22168480	Ckap2_NM_001004140_utr3_0_0_chr8_22168152_r	12	-	579	12	1	0	0.00831
chr8	22168490	22168491	Ckap2_NM_001004140_utr3_0_0_chr8_22168152_r	18	-	579	18	1	0	0.00361
chr8	22168550	22168551	Ckap2_NM_001004140_utr3_0_0_chr8_22168152_r	27	-	579	34	1	0	0.0041
chr8	22168708	22168709	Ckap2_NM_001004140_utr3_0_0_chr8_22168152_r	17	-	579	26	1	0	0.00361
chr2	91620418	91620419	Ckap5_NM_001165989_utr3_43_0_chr2_91620225_f,Ckap5_NM_029437_utr3_42_0_chr2_91620225_f	7	+	441	7	1	0.0828116	0.000477
chr2	91620626	91620627	Ckap5_NM_001165989_utr3_43_0_chr2_91620225_f,Ckap5_NM_029437_utr3_42_0_chr2_91620225_f	6	+	441	6	1	0.0828116	0.000656
chr3	89415557	89415559	Cks1b_NM_016904_utr3_0_0_chr3_89415472_r	8	-	439	14	2	0	0.000589
chr1	118609297	118609298	Clasp1_NM_001293300_utr3_40_0_chr1_118606995_f,Clasp1_NM_001293301_utr3_35_0_chr1_118606995_f,Clasp1_NM_029709_utr3_36_0_chr1_118606995_f	5	+	2468	5	1	0.0147974	0.00192
chr1	118609409	118609410	Clasp1_NM_001293300_utr3_40_0_chr1_118606995_f,Clasp1_NM_001293301_utr3_35_0_chr1_118606995_f,Clasp1_NM_029709_utr3_36_0_chr1_118606995_f	7	+	2468	12	1	0.0147974	0.00136
chr9	113918272	113918273	Clasp2_NM_001081960_utr3_33_0_chr9_113918082_f,Clasp2_NM_001114347_utr3_39_0_chr9_113918082_f,Clasp2_NM_001286600_utr3_34_0_chr9_113918082_f,Clasp2_NM_001286601_utr3_34_0_chr9_113918082_f,Clasp2_NM_001286602_utr3_34_0_chr9_113918082_f,Clasp2_NM_029633_utr3_32_0_chr9_113918082_f	10	+	1616	10	1	0.0332426	0.000366
chr16	58733589	58733590	Cldnd1_NM_001252450_utr3_5_0_chr16_58733060_f,Cldnd1_NM_001252451_utr3_4_0_chr16_58733060_f,Cldnd1_NM_001356488_utr3_5_0_chr16_58733060_f,Cldnd1_NM_171826_utr3_5_0_chr16_58733060_f	4	+	1188	4	1	0	0.00145
chr4	135214401	135214403	Clic4_NM_013885_utr3_0_0_chr4_135213970_r	9	-	3131	21	2	0	0.00366
chr4	135214418	135214419	Clic4_NM_013885_utr3_0_0_chr4_135213970_r	9	-	3131	26	1	0	0.00085
chr4	135214465	135214466	Clic4_NM_013885_utr3_0_0_chr4_135213970_r	6	-	3131	6	1	0	0.00604
chr4	135214538	135214539	Clic4_NM_013885_utr3_0_0_chr4_135213970_r	6	-	3131	6	1	0	0.00262
chr4	135214548	135214549	Clic4_NM_013885_utr3_0_0_chr4_135213970_r	6	-	3131	6	1	0	0.00604
chr4	135215552	135215553	Clic4_NM_013885_utr3_0_0_chr4_135213970_r	8	-	3131	8	1	0	0.00399
chr4	135216135	135216136	Clic4_NM_013885_utr3_0_0_chr4_135213970_r	13	-	3131	13	1	0	0.0004
chr16	92539850	92539852	Clic6_NM_172469_utr3_5_0_chr16_92539597_f	12	+	1645	21	2	0.0326565	0.000306
chr16	92541219	92541220	Clic6_NM_172469_utr3_5_0_chr16_92539597_f	4	+	1645	4	1	0.0326565	0.00241
chr11	45910258	45910259	Clint1_NM_001045520_utr3_11_0_chr11_45909288_f,Clint1_NM_001346760_utr3_11_0_chr11_45909288_f	8	+	1338	8	1	0	0.00156
chr11	45910302	45910303	Clint1_NM_001045520_utr3_11_0_chr11_45909288_f,Clint1_NM_001346760_utr3_11_0_chr11_45909288_f	9	+	1338	9	1	0	0.00254
chr11	45910591	45910592	Clint1_NM_001045520_utr3_11_0_chr11_45909288_f,Clint1_NM_001346760_utr3_11_0_chr11_45909288_f	6	+	1338	6	1	0	0.00214
chr14	103076607	103076608	Cln5_NM_001033242_utr3_3_0_chr14_103076340_f	4	+	1291	4	1	0.6457	0.000878
chr14	103076674	103076675	Cln5_NM_001033242_utr3_3_0_chr14_103076340_f	7	+	1291	8	1	0.6457	0.000196
chr14	103076683	103076684	Cln5_NM_001033242_utr3_3_0_chr14_103076340_f	13	+	1291	13	1	0.6457	4.75e-05
chr14	103076711	103076712	Cln5_NM_001033242_utr3_3_0_chr14_103076340_f	6	+	1291	10	1	0.6457	0.000501
chr14	103076727	103076728	Cln5_NM_001033242_utr3_3_0_chr14_103076340_f	5	+	1291	5	1	0.6457	0.000878
chr14	103076750	103076751	Cln5_NM_001033242_utr3_3_0_chr14_103076340_f	6	+	1291	6	1	0.6457	0.000526
chr14	103077553	103077554	Cln5_NM_001033242_utr3_3_0_chr14_103076340_f	6	+	1291	6	1	0.6457	0.000381
chr14	103077566	103077567	Cln5_NM_001033242_utr3_3_0_chr14_103076340_f	8	+	1291	8	1	0.6457	0.000381
chr7	97718773	97718774	Clns1a_NM_023671_utr3_6_0_chr7_97718219_f	17	+	2575	17	1	0.0141825	0.00145
chr5	76213408	76213409	Clock_NM_001289826_utr3_0_0_chr5_76209868_r,Clock_NM_001305222_utr3_0_0_chr5_76209868_r,Clock_NM_007715_utr3_0_0_chr5_76209868_r	4	-	6831	4	1	0.0864849	0.00128
chr5	76215270	76215271	Clock_NM_001289826_utr3_0_0_chr5_76209868_r,Clock_NM_001305222_utr3_0_0_chr5_76209868_r,Clock_NM_007715_utr3_0_0_chr5_76209868_r	6	-	6831	6	1	0.0864849	0.00128
chr5	76215764	76215765	Clock_NM_001289826_utr3_0_0_chr5_76209868_r,Clock_NM_001305222_utr3_0_0_chr5_76209868_r,Clock_NM_007715_utr3_0_0_chr5_76209868_r	10	-	6831	10	1	0.0864849	0.000195
chr5	76215851	76215852	Clock_NM_001289826_utr3_0_0_chr5_76209868_r,Clock_NM_001305222_utr3_0_0_chr5_76209868_r,Clock_NM_007715_utr3_0_0_chr5_76209868_r	9	-	6831	9	1	0.0864849	0.00149
chr13	73620535	73620536	Clptm1l_NM_146047_utr3_16_0_chr13_73620118_f	14	+	522	16	1	0	0.0035
chr13	73620550	73620552	Clptm1l_NM_146047_utr3_16_0_chr13_73620118_f	9	+	522	19	2	0	0.00233
chr4	149648653	149648655	Clstn1_NM_001290989_utr3_17_0_chr4_149647565_f,Clstn1_NM_023051_utr3_18_0_chr4_149647565_f	10	+	1335	14	2	0.0547115	0.0008
chr4	149648871	149648873	Clstn1_NM_001290989_utr3_17_0_chr4_149647565_f,Clstn1_NM_023051_utr3_18_0_chr4_149647565_f	12	+	1335	22	2	0.0547115	3.54e-05
chr4	44032714	44032715	Clta_NM_001080384_utr3_4_0_chr4_44032573_f,Clta_NM_001080385_utr3_6_0_chr4_44032573_f,Clta_NM_001080386_utr3_4_0_chr4_44032573_f,Clta_NM_001290470_utr3_5_0_chr4_44032573_f,Clta_NM_016760_utr3_5_0_chr4_44032573_f	7	+	276	10	1	0	0.00269
chr11	86694707	86694708	Cltc_NM_001003908_utr3_0_0_chr11_86694354_r,Cltc_NM_001356393_utr3_0_0_chr11_86694354_r	12	-	1212	20	1	0.073043	0.000261
chr11	86694770	86694771	Cltc_NM_001003908_utr3_0_0_chr11_86694354_r,Cltc_NM_001356393_utr3_0_0_chr11_86694354_r	8	-	1212	8	1	0.073043	0.000615
chr11	86694819	86694820	Cltc_NM_001003908_utr3_0_0_chr11_86694354_r,Cltc_NM_001356393_utr3_0_0_chr11_86694354_r	5	-	1212	5	1	0.073043	0.0018
chr11	86695262	86695263	Cltc_NM_001003908_utr3_0_0_chr11_86694354_r,Cltc_NM_001356393_utr3_0_0_chr11_86694354_r	5	-	1212	5	1	0.073043	0.000979
chr11	86695368	86695369	Cltc_NM_001003908_utr3_0_0_chr11_86694354_r,Cltc_NM_001356393_utr3_0_0_chr11_86694354_r	6	-	1212	6	1	0.073043	0.0016
chr11	86695504	86695505	Cltc_NM_001003908_utr3_0_0_chr11_86694354_r,Cltc_NM_001356393_utr3_0_0_chr11_86694354_r	5	-	1212	5	1	0.073043	0.0018
chr6	142775476	142775477	Cmas_NM_009908_utr3_7_0_chr6_142775341_f	7	+	374	7	1	0	0.00507
chr6	142775685	142775687	Cmas_NM_009908_utr3_7_0_chr6_142775341_f	8	+	374	13	2	0	0.00949
chr8	117460158	117460159	Cmip_NM_001163262_utr3_20_0_chr8_117459383_f,Cmip_NM_028941_utr3_20_0_chr8_117459383_f	6	+	2123	6	1	0.0425059	0.00156
chr4	114960746	114960747	Cmpk1_NM_025647_utr3_0_0_chr4_114960613_r	27	-	1101	40	1	0	0.00483
chr4	114960753	114960754	Cmpk1_NM_025647_utr3_0_0_chr4_114960613_r	60	-	1101	60	1	0	6.73e-05
chr9	114746817	114746818	Cmtm6_NM_026036_utr3_3_0_chr9_114746577_f	5	+	2767	5	1	0	0.00499
chr9	114746822	114746823	Cmtm6_NM_026036_utr3_3_0_chr9_114746577_f	11	+	2767	16	1	0	0.000506
chr9	114747005	114747006	Cmtm6_NM_026036_utr3_3_0_chr9_114746577_f	6	+	2767	6	1	0	0.00499
chr6	87843109	87843110	Cnbp_NM_001109745_utr3_0_0_chr6_87842615_r,Cnbp_NM_001109746_utr3_0_0_chr6_87842615_r,Cnbp_NM_001347325_utr3_0_0_chr6_87842615_r,Cnbp_NM_001355195_utr3_0_0_chr6_87842615_r,Cnbp_NM_013493_utr3_0_0_chr6_87842615_r	22	-	1424	22	1	0.0188012	5.37e-06
chr6	87843112	87843113	Cnbp_NM_001109745_utr3_0_0_chr6_87842615_r,Cnbp_NM_001109746_utr3_0_0_chr6_87842615_r,Cnbp_NM_001347325_utr3_0_0_chr6_87842615_r,Cnbp_NM_001355195_utr3_0_0_chr6_87842615_r,Cnbp_NM_013493_utr3_0_0_chr6_87842615_r	6	-	1424	6	1	0.0188012	0.00155
chr6	87843136	87843138	Cnbp_NM_001109745_utr3_0_0_chr6_87842615_r,Cnbp_NM_001109746_utr3_0_0_chr6_87842615_r,Cnbp_NM_001347325_utr3_0_0_chr6_87842615_r,Cnbp_NM_001355195_utr3_0_0_chr6_87842615_r,Cnbp_NM_013493_utr3_0_0_chr6_87842615_r	37	-	1424	67	2	0.0188012	2.54e-05
chr6	87843139	87843140	Cnbp_NM_001109745_utr3_0_0_chr6_87842615_r,Cnbp_NM_001109746_utr3_0_0_chr6_87842615_r,Cnbp_NM_001347325_utr3_0_0_chr6_87842615_r,Cnbp_NM_001355195_utr3_0_0_chr6_87842615_r,Cnbp_NM_013493_utr3_0_0_chr6_87842615_r	37	-	1424	67	1	0.0188012	0.000692
chr6	87843143	87843147	Cnbp_NM_001109745_utr3_0_0_chr6_87842615_r,Cnbp_NM_001109746_utr3_0_0_chr6_87842615_r,Cnbp_NM_001347325_utr3_0_0_chr6_87842615_r,Cnbp_NM_001355195_utr3_0_0_chr6_87842615_r,Cnbp_NM_013493_utr3_0_0_chr6_87842615_r	19	-	1424	47	4	0.0188012	0.000175
chr6	87843149	87843150	Cnbp_NM_001109745_utr3_0_0_chr6_87842615_r,Cnbp_NM_001109746_utr3_0_0_chr6_87842615_r,Cnbp_NM_001347325_utr3_0_0_chr6_87842615_r,Cnbp_NM_001355195_utr3_0_0_chr6_87842615_r,Cnbp_NM_013493_utr3_0_0_chr6_87842615_r	10	-	1424	14	1	0.0188012	0.000237
chr6	87843158	87843159	Cnbp_NM_001109745_utr3_0_0_chr6_87842615_r,Cnbp_NM_001109746_utr3_0_0_chr6_87842615_r,Cnbp_NM_001347325_utr3_0_0_chr6_87842615_r,Cnbp_NM_001355195_utr3_0_0_chr6_87842615_r,Cnbp_NM_013493_utr3_0_0_chr6_87842615_r	8	-	1424	8	1	0.0188012	0.00181
chr6	87843169	87843170	Cnbp_NM_001109745_utr3_0_0_chr6_87842615_r,Cnbp_NM_001109746_utr3_0_0_chr6_87842615_r,Cnbp_NM_001347325_utr3_0_0_chr6_87842615_r,Cnbp_NM_001355195_utr3_0_0_chr6_87842615_r,Cnbp_NM_013493_utr3_0_0_chr6_87842615_r	12	-	1424	12	1	0.0188012	0.000305
chr6	87843261	87843262	Cnbp_NM_001109745_utr3_0_0_chr6_87842615_r,Cnbp_NM_001109746_utr3_0_0_chr6_87842615_r,Cnbp_NM_001347325_utr3_0_0_chr6_87842615_r,Cnbp_NM_001355195_utr3_0_0_chr6_87842615_r,Cnbp_NM_013493_utr3_0_0_chr6_87842615_r	12	-	1424	27	1	0.0188012	0.000661
chr6	87843264	87843265	Cnbp_NM_001109745_utr3_0_0_chr6_87842615_r,Cnbp_NM_001109746_utr3_0_0_chr6_87842615_r,Cnbp_NM_001347325_utr3_0_0_chr6_87842615_r,Cnbp_NM_001355195_utr3_0_0_chr6_87842615_r,Cnbp_NM_013493_utr3_0_0_chr6_87842615_r	12	-	1424	27	1	0.0188012	0.000175
chr6	87843282	87843283	Cnbp_NM_001109745_utr3_0_0_chr6_87842615_r,Cnbp_NM_001109746_utr3_0_0_chr6_87842615_r,Cnbp_NM_001347325_utr3_0_0_chr6_87842615_r,Cnbp_NM_001355195_utr3_0_0_chr6_87842615_r,Cnbp_NM_013493_utr3_0_0_chr6_87842615_r	7	-	1424	7	1	0.0188012	0.001
chr6	87843317	87843318	Cnbp_NM_001109745_utr3_0_0_chr6_87842615_r,Cnbp_NM_001109746_utr3_0_0_chr6_87842615_r,Cnbp_NM_001347325_utr3_0_0_chr6_87842615_r,Cnbp_NM_001355195_utr3_0_0_chr6_87842615_r,Cnbp_NM_013493_utr3_0_0_chr6_87842615_r	11	-	1424	11	1	0.0188012	0.00101
chr6	87843361	87843362	Cnbp_NM_001109745_utr3_0_0_chr6_87842615_r,Cnbp_NM_001109746_utr3_0_0_chr6_87842615_r,Cnbp_NM_001347325_utr3_0_0_chr6_87842615_r,Cnbp_NM_001355195_utr3_0_0_chr6_87842615_r,Cnbp_NM_013493_utr3_0_0_chr6_87842615_r	5	-	1424	5	1	0.0188012	0.0011
chr6	87843666	87843667	Cnbp_NM_001109745_utr3_0_0_chr6_87842615_r,Cnbp_NM_001109746_utr3_0_0_chr6_87842615_r,Cnbp_NM_001347325_utr3_0_0_chr6_87842615_r,Cnbp_NM_001355195_utr3_0_0_chr6_87842615_r,Cnbp_NM_013493_utr3_0_0_chr6_87842615_r	6	-	1424	10	1	0.0188012	0.000403
chr6	87843707	87843708	Cnbp_NM_001109745_utr3_0_0_chr6_87842615_r,Cnbp_NM_001109746_utr3_0_0_chr6_87842615_r,Cnbp_NM_001347325_utr3_0_0_chr6_87842615_r,Cnbp_NM_001355195_utr3_0_0_chr6_87842615_r,Cnbp_NM_013493_utr3_0_0_chr6_87842615_r	6	-	1424	6	1	0.0188012	0.00181
chr6	87843814	87843818	Cnbp_NM_001109745_utr3_0_0_chr6_87842615_r,Cnbp_NM_001109746_utr3_0_0_chr6_87842615_r,Cnbp_NM_001347325_utr3_0_0_chr6_87842615_r,Cnbp_NM_001355195_utr3_0_0_chr6_87842615_r,Cnbp_NM_013493_utr3_0_0_chr6_87842615_r	87	-	1424	146	4	0.0188012	1e-45
chr6	87843827	87843828	Cnbp_NM_001109745_utr3_0_0_chr6_87842615_r,Cnbp_NM_001109746_utr3_0_0_chr6_87842615_r,Cnbp_NM_001347325_utr3_0_0_chr6_87842615_r,Cnbp_NM_001355195_utr3_0_0_chr6_87842615_r,Cnbp_NM_013493_utr3_0_0_chr6_87842615_r	9	-	1424	9	1	0.0188012	0.00155
chr6	87843831	87843834	Cnbp_NM_001109745_utr3_0_0_chr6_87842615_r,Cnbp_NM_001109746_utr3_0_0_chr6_87842615_r,Cnbp_NM_001347325_utr3_0_0_chr6_87842615_r,Cnbp_NM_001355195_utr3_0_0_chr6_87842615_r,Cnbp_NM_013493_utr3_0_0_chr6_87842615_r	35	-	1424	45	3	0.0188012	0.000298
chr6	87843845	87843847	Cnbp_NM_001109745_utr3_0_0_chr6_87842615_r,Cnbp_NM_001109746_utr3_0_0_chr6_87842615_r,Cnbp_NM_001347325_utr3_0_0_chr6_87842615_r,Cnbp_NM_001355195_utr3_0_0_chr6_87842615_r,Cnbp_NM_013493_utr3_0_0_chr6_87842615_r	18	-	1424	37	2	0.0188012	7.58e-05
chr6	87843849	87843851	Cnbp_NM_001109745_utr3_0_0_chr6_87842615_r,Cnbp_NM_001109746_utr3_0_0_chr6_87842615_r,Cnbp_NM_001347325_utr3_0_0_chr6_87842615_r,Cnbp_NM_001355195_utr3_0_0_chr6_87842615_r,Cnbp_NM_013493_utr3_0_0_chr6_87842615_r	13	-	1424	27	2	0.0188012	0.000403
chr6	87843855	87843858	Cnbp_NM_001109745_utr3_0_0_chr6_87842615_r,Cnbp_NM_001109746_utr3_0_0_chr6_87842615_r,Cnbp_NM_001347325_utr3_0_0_chr6_87842615_r,Cnbp_NM_001355195_utr3_0_0_chr6_87842615_r,Cnbp_NM_013493_utr3_0_0_chr6_87842615_r	36	-	1424	71	3	0.0188012	6.44e-09
chr6	87843871	87843874	Cnbp_NM_001109745_utr3_0_0_chr6_87842615_r,Cnbp_NM_001109746_utr3_0_0_chr6_87842615_r,Cnbp_NM_001347325_utr3_0_0_chr6_87842615_r,Cnbp_NM_001355195_utr3_0_0_chr6_87842615_r,Cnbp_NM_013493_utr3_0_0_chr6_87842615_r	21	-	1424	32	3	0.0188012	3.13e-05
chr6	87843880	87843882	Cnbp_NM_001109745_utr3_0_0_chr6_87842615_r,Cnbp_NM_001109746_utr3_0_0_chr6_87842615_r,Cnbp_NM_001347325_utr3_0_0_chr6_87842615_r,Cnbp_NM_001355195_utr3_0_0_chr6_87842615_r,Cnbp_NM_013493_utr3_0_0_chr6_87842615_r	11	-	1424	15	2	0.0188012	0.000149
chr6	87843989	87843990	Cnbp_NM_001109745_utr3_0_0_chr6_87842615_r,Cnbp_NM_001109746_utr3_0_0_chr6_87842615_r,Cnbp_NM_001347325_utr3_0_0_chr6_87842615_r,Cnbp_NM_001355195_utr3_0_0_chr6_87842615_r,Cnbp_NM_013493_utr3_0_0_chr6_87842615_r	13	-	1424	13	1	0.0188012	0.000443
chr6	87843992	87843994	Cnbp_NM_001109745_utr3_0_0_chr6_87842615_r,Cnbp_NM_001109746_utr3_0_0_chr6_87842615_r,Cnbp_NM_001347325_utr3_0_0_chr6_87842615_r,Cnbp_NM_001355195_utr3_0_0_chr6_87842615_r,Cnbp_NM_013493_utr3_0_0_chr6_87842615_r	9	-	1424	27	2	0.0188012	0.00021
chr6	87844028	87844029	Cnbp_NM_001109745_utr3_0_0_chr6_87842615_r,Cnbp_NM_001109746_utr3_0_0_chr6_87842615_r,Cnbp_NM_001347325_utr3_0_0_chr6_87842615_r,Cnbp_NM_001355195_utr3_0_0_chr6_87842615_r,Cnbp_NM_013493_utr3_0_0_chr6_87842615_r	9	-	1424	9	1	0.0188012	0.001
chr6	87844036	87844037	Cnbp_NM_001109745_utr3_0_0_chr6_87842615_r,Cnbp_NM_001109746_utr3_0_0_chr6_87842615_r,Cnbp_NM_001347325_utr3_0_0_chr6_87842615_r,Cnbp_NM_001355195_utr3_0_0_chr6_87842615_r,Cnbp_NM_013493_utr3_0_0_chr6_87842615_r	11	-	1424	15	1	0.0188012	0.00155
chr8	88134403	88134406	Cnep1r1_NM_029074_utr3_5_0_chr8_88133830_f	7	+	1368	21	3	0.0266959	0.000702
chr8	88135050	88135051	Cnep1r1_NM_029074_utr3_5_0_chr8_88133830_f	13	+	1368	13	1	0.0266959	0.000239
chr10	7119132	7119133	Cnksr3_NM_172546_utr3_0_0_chr10_7119062_r	6	-	1226	6	1	0	0.00194
chr10	7120166	7120167	Cnksr3_NM_172546_utr3_0_0_chr10_7119062_r	4	-	1226	8	1	0	0.00194
chr3	121457788	121457789	Cnn3_NM_028044_utr3_6_0_chr3_121457427_f	7	+	779	7	1	0	0.00164
chr3	121458116	121458117	Cnn3_NM_028044_utr3_6_0_chr3_121457427_f	5	+	779	5	1	0	0.0046
chr8	95720245	95720246	Cnot1_NM_001205226_utr3_0_0_chr8_95719451_r,Cnot1_NM_153164_utr3_0_0_chr8_95719451_r,Cnot1_NM_178078_utr3_0_0_chr8_95719451_r	12	-	956	19	1	0.0463013	0.00076
chr9	114586153	114586154	Cnot10_NM_153585_utr3_0_0_chr9_114585874_r	6	-	466	6	1	0.15244	0.000499
chr1	39545294	39545295	Cnot11_NM_028043_utr3_6_0_chr1_39545267_f	16	+	1611	16	1	0.314736	0.000787
chr1	39545304	39545305	Cnot11_NM_028043_utr3_6_0_chr1_39545267_f	4	+	1611	4	1	0.314736	0.00145
chr1	39545315	39545316	Cnot11_NM_028043_utr3_6_0_chr1_39545267_f	10	+	1611	10	1	0.314736	0.000523
chr11	49671869	49671870	Cnot6_NM_001290741_utr3_0_0_chr11_49671497_r,Cnot6_NM_212484_utr3_0_0_chr11_49671497_r	5	-	3696	5	1	0	0.00137
chr5	96075618	96075619	Cnot6l_NM_001285511_utr3_0_0_chr5_96070333_r,Cnot6l_NM_001285514_utr3_0_0_chr5_96070333_r,Cnot6l_NM_144910_utr3_0_0_chr5_96070333_r,Cnot6l_NM_178854_utr3_0_0_chr5_96070333_r	6	-	6847	6	1	0	0.00532
chr5	96075635	96075637	Cnot6l_NM_001285511_utr3_0_0_chr5_96070333_r,Cnot6l_NM_001285514_utr3_0_0_chr5_96070333_r,Cnot6l_NM_144910_utr3_0_0_chr5_96070333_r,Cnot6l_NM_178854_utr3_0_0_chr5_96070333_r	10	-	6847	18	2	0	5.13e-05
chr5	96075666	96075667	Cnot6l_NM_001285511_utr3_0_0_chr5_96070333_r,Cnot6l_NM_001285514_utr3_0_0_chr5_96070333_r,Cnot6l_NM_144910_utr3_0_0_chr5_96070333_r,Cnot6l_NM_178854_utr3_0_0_chr5_96070333_r	5	-	6847	5	1	0	0.00403
chr5	96075668	96075669	Cnot6l_NM_001285511_utr3_0_0_chr5_96070333_r,Cnot6l_NM_001285514_utr3_0_0_chr5_96070333_r,Cnot6l_NM_144910_utr3_0_0_chr5_96070333_r,Cnot6l_NM_178854_utr3_0_0_chr5_96070333_r	6	-	6847	6	1	0	0.00532
chr5	96075678	96075679	Cnot6l_NM_001285511_utr3_0_0_chr5_96070333_r,Cnot6l_NM_001285514_utr3_0_0_chr5_96070333_r,Cnot6l_NM_144910_utr3_0_0_chr5_96070333_r,Cnot6l_NM_178854_utr3_0_0_chr5_96070333_r	5	-	6847	5	1	0	0.00532
chr5	96075762	96075763	Cnot6l_NM_001285511_utr3_0_0_chr5_96070333_r,Cnot6l_NM_001285514_utr3_0_0_chr5_96070333_r,Cnot6l_NM_144910_utr3_0_0_chr5_96070333_r,Cnot6l_NM_178854_utr3_0_0_chr5_96070333_r	9	-	6847	9	1	0	0.00177
chr5	96075921	96075922	Cnot6l_NM_001285511_utr3_0_0_chr5_96070333_r,Cnot6l_NM_001285514_utr3_0_0_chr5_96070333_r,Cnot6l_NM_144910_utr3_0_0_chr5_96070333_r,Cnot6l_NM_178854_utr3_0_0_chr5_96070333_r	6	-	6847	6	1	0	0.00325
chr5	96075932	96075933	Cnot6l_NM_001285511_utr3_0_0_chr5_96070333_r,Cnot6l_NM_001285514_utr3_0_0_chr5_96070333_r,Cnot6l_NM_144910_utr3_0_0_chr5_96070333_r,Cnot6l_NM_178854_utr3_0_0_chr5_96070333_r	7	-	6847	18	1	0	0.00238
chr5	96076076	96076077	Cnot6l_NM_001285511_utr3_0_0_chr5_96070333_r,Cnot6l_NM_001285514_utr3_0_0_chr5_96070333_r,Cnot6l_NM_144910_utr3_0_0_chr5_96070333_r,Cnot6l_NM_178854_utr3_0_0_chr5_96070333_r	6	-	6847	10	1	0	0.00532
chr5	96076213	96076214	Cnot6l_NM_001285511_utr3_0_0_chr5_96070333_r,Cnot6l_NM_001285514_utr3_0_0_chr5_96070333_r,Cnot6l_NM_144910_utr3_0_0_chr5_96070333_r,Cnot6l_NM_178854_utr3_0_0_chr5_96070333_r	6	-	6847	6	1	0	0.00532
chr5	96076378	96076380	Cnot6l_NM_001285511_utr3_0_0_chr5_96070333_r,Cnot6l_NM_001285514_utr3_0_0_chr5_96070333_r,Cnot6l_NM_144910_utr3_0_0_chr5_96070333_r,Cnot6l_NM_178854_utr3_0_0_chr5_96070333_r	6	-	6847	14	2	0	0.000777
chr5	96076384	96076385	Cnot6l_NM_001285511_utr3_0_0_chr5_96070333_r,Cnot6l_NM_001285514_utr3_0_0_chr5_96070333_r,Cnot6l_NM_144910_utr3_0_0_chr5_96070333_r,Cnot6l_NM_178854_utr3_0_0_chr5_96070333_r	4	-	6847	4	1	0	0.00532
chr8	40493888	40493889	Cnot7_NM_001271542_utr3_0_0_chr8_40492538_r,Cnot7_NM_001271543_utr3_0_0_chr8_40492538_r,Cnot7_NM_011135_utr3_0_0_chr8_40492538_r	9	-	1449	9	1	0	0.00238
chr8	40493927	40493928	Cnot7_NM_001271542_utr3_0_0_chr8_40492538_r,Cnot7_NM_001271543_utr3_0_0_chr8_40492538_r,Cnot7_NM_011135_utr3_0_0_chr8_40492538_r	9	-	1449	9	1	0	0.000529
chr1	74530213	74530214	Cnot9_NM_021383_utr3_7_0_chr1_74528855_f	6	+	1988	6	1	0	0.00831
chr1	74530275	74530276	Cnot9_NM_021383_utr3_7_0_chr1_74528855_f	6	+	1988	6	1	0	0.00565
chr1	74530335	74530336	Cnot9_NM_021383_utr3_7_0_chr1_74528855_f	7	+	1988	12	1	0	0.00202
chr11	101288533	101288534	Cntd1_NM_026562_utr3_6_0_chr11_101287582_f	28	+	1120	28	1	0	0.00162
chr11	101288551	101288552	Cntd1_NM_026562_utr3_6_0_chr11_101287582_f	20	+	1120	31	1	0	0.00449
chr11	101288590	101288591	Cntd1_NM_026562_utr3_6_0_chr11_101287582_f	18	+	1120	30	1	0	0.00181
chr1	37417118	37417119	Coa5_NM_198006_utr3_0_0_chr1_37417085_r	11	-	3501	11	1	0.0782044	0.000239
chr1	37417327	37417328	Coa5_NM_198006_utr3_0_0_chr1_37417085_r	6	-	3501	6	1	0.0782044	0.000977
chr1	37418631	37418632	Coa5_NM_198006_utr3_0_0_chr1_37417085_r	4	-	3501	4	1	0.0782044	0.00143
chr8	124551645	124551646	Cog2_NM_029746_utr3_17_0_chr8_124551493_f	6	+	515	6	1	0	0.00104
chr2	180621986	180621987	Col9a3_NM_009936_utr3_31_0_chr2_180621421_f	6	+	765	6	1	0	0.00346
chr2	180622053	180622054	Col9a3_NM_009936_utr3_31_0_chr2_180621421_f	4	+	765	4	1	0	0.00346
chr2	180622140	180622141	Col9a3_NM_009936_utr3_31_0_chr2_180621421_f	7	+	765	7	1	0	0.00156
chr2	153618932	153618934	Commd7_NM_001195390_utr3_0_0_chr2_153616930_r,Commd7_NM_133850_utr3_0_0_chr2_153616930_r	16	-	2506	22	2	0	9.13e-05
chr5	72159161	72159162	Commd8_NM_001356611_utr3_0_0_chr5_72156576_r,Commd8_NM_001356612_utr3_0_0_chr5_72156576_r,Commd8_NM_001356613_utr3_0_0_chr5_72156576_r,Commd8_NM_001356614_utr3_0_0_chr5_72156576_r,Commd8_NM_178599_utr3_0_0_chr5_72156576_r	4	-	3297	4	1	0	0.000398
chr1	172122255	172122256	Copa_NM_009938_utr3_32_0_chr1_172121760_f	10	+	573	10	1	0.0937522	0.00128
chr1	172122263	172122266	Copa_NM_009938_utr3_32_0_chr1_172121760_f	21	+	573	29	3	0.0937522	0.000543
chr1	172122283	172122284	Copa_NM_009938_utr3_32_0_chr1_172121760_f	7	+	573	11	1	0.0937522	0.000396
chr7	114215782	114215783	Copb1_NM_033370_utr3_0_0_chr7_114215559_r	14	-	319	14	1	0	0.000814
chr9	98588141	98588142	Copb2_NM_015827_utr3_21_0_chr9_98588141_f	5	+	235	5	1	0.155404	0.000885
chr9	98588342	98588343	Copb2_NM_015827_utr3_21_0_chr9_98588141_f	15	+	235	19	1	0.155404	0.000264
chr8	13884820	13884821	Coprs_NM_025556_utr3_0_0_chr8_13884788_r	6	-	244	9	1	0.14337	0.000346
chr8	13884822	13884823	Coprs_NM_025556_utr3_0_0_chr8_13884788_r	6	-	244	6	1	0.14337	0.000561
chr8	13884824	13884825	Coprs_NM_025556_utr3_0_0_chr8_13884788_r	70	-	244	70	1	0.14337	2.08e-06
chr8	13884826	13884827	Coprs_NM_025556_utr3_0_0_chr8_13884788_r	11	-	244	20	1	0.14337	0.000561
chr8	13884828	13884829	Coprs_NM_025556_utr3_0_0_chr8_13884788_r	11	-	244	20	1	0.14337	9.2e-05
chr8	13884833	13884835	Coprs_NM_025556_utr3_0_0_chr8_13884788_r	15	-	244	24	2	0.14337	3.27e-06
chr8	13884843	13884844	Coprs_NM_025556_utr3_0_0_chr8_13884788_r	12	-	244	21	1	0.14337	0.000561
chr8	13884845	13884846	Coprs_NM_025556_utr3_0_0_chr8_13884788_r	12	-	244	21	1	0.14337	2.32e-06
chr8	13884847	13884848	Coprs_NM_025556_utr3_0_0_chr8_13884788_r	11	-	244	21	1	0.14337	0.000561
chr8	13884962	13884964	Coprs_NM_025556_utr3_0_0_chr8_13884788_r	44	-	244	59	2	0.14337	6.27e-05
chr8	13884971	13884972	Coprs_NM_025556_utr3_0_0_chr8_13884788_r	10	-	244	10	1	0.14337	0.000561
chr1	86606193	86606194	Cops7b_NM_172974_utr3_6_0_chr1_86605217_f	11	+	1284	15	1	0	0.000234
chr1	90612324	90612326	Cops8_NM_133805_utr3_7_0_chr1_90612254_f	21	+	1088	29	2	0	0.00108
chr1	90613002	90613003	Cops8_NM_133805_utr3_7_0_chr1_90612254_f	21	+	1088	21	1	0	0.00914
chr1	90613036	90613037	Cops8_NM_133805_utr3_7_0_chr1_90612254_f	8	+	1088	8	1	0	0.00547
chr1	90613067	90613068	Cops8_NM_133805_utr3_7_0_chr1_90612254_f	16	+	1088	16	1	0	0.00751
chr1	90613082	90613083	Cops8_NM_133805_utr3_7_0_chr1_90612254_f	8	+	1088	8	1	0	0.00914
chr1	90613086	90613087	Cops8_NM_133805_utr3_7_0_chr1_90612254_f	25	+	1088	25	1	0	0.0047
chr1	55072192	55072193	Coq10b_NM_001039710_utr3_4_0_chr1_55071804_f,Coq10b_NM_026424_utr3_3_0_chr1_55071804_f	9	+	899	9	1	0.100378	0.000357
chr1	55072207	55072208	Coq10b_NM_001039710_utr3_4_0_chr1_55071804_f,Coq10b_NM_026424_utr3_3_0_chr1_55071804_f	12	+	899	19	1	0.100378	0.000172
chr1	55072628	55072629	Coq10b_NM_001039710_utr3_4_0_chr1_55071804_f,Coq10b_NM_026424_utr3_3_0_chr1_55071804_f	4	+	899	4	1	0.100378	0.000964
chr11	90644801	90644802	Cox11_NM_199008_utr3_3_0_chr11_90644553_f	6	+	1425	6	1	0.241235	0.00153
chr15	99727975	99727976	Cox14_NM_183256_utr3_1_0_chr15_99727827_f	13	+	310	13	1	0.117806	0.0006
chr15	99727977	99727978	Cox14_NM_183256_utr3_1_0_chr15_99727827_f	6	+	310	6	1	0.117806	0.00083
chr19	43735392	43735393	Cox15_NM_144874_utr3_0_0_chr19_43733254_r	8	-	3467	8	1	0.00772223	0.00161
chr17	83501964	83501965	Cox7a2l_NM_001159529_utr3_0_0_chr17_83501917_r,Cox7a2l_NM_009187_utr3_0_0_chr17_83501917_r	7	-	686	7	1	0.0390276	0.000496
chr7	81347518	81347519	Cpeb1_NM_001252525_utr3_0_0_chr7_81347026_r,Cpeb1_NM_001252526_utr3_0_0_chr7_81347026_r,Cpeb1_NM_001357107_utr3_0_0_chr7_81347026_r,Cpeb1_NM_007755_utr3_0_0_chr7_81347026_r	6	-	1315	6	1	0	0.00944
chr7	81348141	81348142	Cpeb1_NM_001252525_utr3_0_0_chr7_81347026_r,Cpeb1_NM_001252526_utr3_0_0_chr7_81347026_r,Cpeb1_NM_001357107_utr3_0_0_chr7_81347026_r,Cpeb1_NM_007755_utr3_0_0_chr7_81347026_r	5	-	1315	5	1	0	0.00583
chr7	81348143	81348144	Cpeb1_NM_001252525_utr3_0_0_chr7_81347026_r,Cpeb1_NM_001252526_utr3_0_0_chr7_81347026_r,Cpeb1_NM_001357107_utr3_0_0_chr7_81347026_r,Cpeb1_NM_007755_utr3_0_0_chr7_81347026_r	12	-	1315	12	1	0	0.00328
chr19	37021916	37021917	Cpeb3_NM_001290826_utr3_0_0_chr19_37021291_r,Cpeb3_NM_001290827_utr3_0_0_chr19_37021291_r,Cpeb3_NM_001290828_utr3_0_0_chr19_37021291_r,Cpeb3_NM_001290829_utr3_0_0_chr19_37021291_r,Cpeb3_NM_198300_utr3_0_0_chr19_37021291_r	6	-	3569	6	1	0	0.000677
chr11	31935503	31935504	Cpeb4_NM_001290676_utr3_8_0_chr11_31931533_f,Cpeb4_NM_001290678_utr3_7_0_chr11_31931533_f,Cpeb4_NM_026252_utr3_9_0_chr11_31931533_f	5	+	4103	5	1	0	0.000706
chr2	156071888	156071891	Cpne1_NM_170588_utr3_0_0_chr2_156071841_r,Cpne1_NM_170590_utr3_0_0_chr2_156071841_r	39	-	1680	79	3	0	3.43e-05
chr2	156071910	156071911	Cpne1_NM_170588_utr3_0_0_chr2_156071841_r,Cpne1_NM_170590_utr3_0_0_chr2_156071841_r	12	-	1680	12	1	0	0.00868
chr2	156071925	156071926	Cpne1_NM_170588_utr3_0_0_chr2_156071841_r,Cpne1_NM_170590_utr3_0_0_chr2_156071841_r	20	-	1680	20	1	0	0.00868
chr2	156071929	156071930	Cpne1_NM_170588_utr3_0_0_chr2_156071841_r,Cpne1_NM_170590_utr3_0_0_chr2_156071841_r	29	-	1680	127	1	0	0.00328
chr2	156071931	156071932	Cpne1_NM_170588_utr3_0_0_chr2_156071841_r,Cpne1_NM_170590_utr3_0_0_chr2_156071841_r	29	-	1680	127	1	0	0.00911
chr2	156071933	156071934	Cpne1_NM_170588_utr3_0_0_chr2_156071841_r,Cpne1_NM_170590_utr3_0_0_chr2_156071841_r	29	-	1680	127	1	0	0.00692
chr2	156071939	156071940	Cpne1_NM_170588_utr3_0_0_chr2_156071841_r,Cpne1_NM_170590_utr3_0_0_chr2_156071841_r	47	-	1680	47	1	0	0.000643
chr16	58679120	58679121	Cpox_NM_007757_utr3_6_0_chr16_58678758_f	5	+	1632	5	1	0	0.00147
chr12	21314806	21314807	Cpsf3_NM_018813_utr3_17_0_chr12_21314750_f	4	+	307	4	1	0.174984	0.00106
chr5	145181388	145181389	Cpsf4_NM_001291248_utr3_7_0_chr5_145181205_f,Cpsf4_NM_001291249_utr3_7_0_chr5_145181205_f,Cpsf4_NM_178576_utr3_6_0_chr5_145181205_f	11	+	837	17	1	0.36454	0.00131
chr5	145181996	145181997	Cpsf4_NM_001291248_utr3_7_0_chr5_145181205_f,Cpsf4_NM_001291249_utr3_7_0_chr5_145181205_f,Cpsf4_NM_178576_utr3_6_0_chr5_145181205_f	20	+	837	20	1	0.36454	0.000292
chr10	117349017	117349018	Cpsf6_NM_001013391_utr3_0_0_chr10_117344668_r,Cpsf6_NM_001310609_utr3_0_0_chr10_117344667_r	5	-	4835	5	1	0	0.00506
chr10	117349115	117349116	Cpsf6_NM_001013391_utr3_0_0_chr10_117344668_r,Cpsf6_NM_001310609_utr3_0_0_chr10_117344667_r	25	-	4835	33	1	0	0.000565
chr10	117349123	117349124	Cpsf6_NM_001013391_utr3_0_0_chr10_117344668_r,Cpsf6_NM_001310609_utr3_0_0_chr10_117344667_r	25	-	4835	25	1	0	0.00287
chr10	117349129	117349130	Cpsf6_NM_001013391_utr3_0_0_chr10_117344668_r,Cpsf6_NM_001310609_utr3_0_0_chr10_117344667_r	15	-	4835	15	1	0	0.00317
chr10	117349143	117349144	Cpsf6_NM_001013391_utr3_0_0_chr10_117344668_r,Cpsf6_NM_001310609_utr3_0_0_chr10_117344667_r	13	-	4835	23	1	0	0.00411
chr10	117349233	117349234	Cpsf6_NM_001013391_utr3_0_0_chr10_117344668_r,Cpsf6_NM_001310609_utr3_0_0_chr10_117344667_r	18	-	4835	18	1	0	0.000854
chr10	117349261	117349263	Cpsf6_NM_001013391_utr3_0_0_chr10_117344668_r,Cpsf6_NM_001310609_utr3_0_0_chr10_117344667_r	6	-	4835	10	2	0	0.00286
chr10	117349267	117349268	Cpsf6_NM_001013391_utr3_0_0_chr10_117344668_r,Cpsf6_NM_001310609_utr3_0_0_chr10_117344667_r	4	-	4835	4	1	0	0.00545
chr9	54773064	54773065	Crabp1_NM_001284507_utr3_2_0_chr9_54772877_f,Crabp1_NM_013496_utr3_3_0_chr9_54772877_f	27	+	234	27	1	0	0.00117
chr1	64601563	64601564	Creb1_NM_001037726_utr3_6_0_chr1_64597379_f,Creb1_NM_009952_utr3_8_0_chr1_64597379_f,Creb1_NM_133828_utr3_7_0_chr1_64597379_f	12	+	7170	12	1	0.0251715	0.00151
chr17	26771520	26771521	Crebrf_NM_029870_utr3_8_0_chr17_26771408_f	6	+	5219	6	1	0	0.00598
chr17	26772570	26772571	Crebrf_NM_029870_utr3_8_0_chr17_26771408_f	5	+	5219	5	1	0	0.00598
chr17	26773629	26773630	Crebrf_NM_029870_utr3_8_0_chr17_26771408_f	15	+	5219	15	1	0	0.00229
chr17	26773699	26773700	Crebrf_NM_029870_utr3_8_0_chr17_26771408_f	4	+	5219	4	1	0	0.00408
chr17	26773720	26773721	Crebrf_NM_029870_utr3_8_0_chr17_26771408_f	5	+	5219	5	1	0	0.00598
chr17	26774125	26774126	Crebrf_NM_029870_utr3_8_0_chr17_26771408_f	5	+	5219	5	1	0	0.00598
chr17	26774772	26774773	Crebrf_NM_029870_utr3_8_0_chr17_26771408_f	5	+	5219	5	1	0	0.00408
chr15	88826475	88826476	Creld2_NM_029720_utr3_9_0_chr15_88826437_f	8	+	245	8	1	0	0.00118
chr17	78375095	78375096	Crim1_NM_015800_utr3_16_0_chr17_78374233_f	8	+	2360	8	1	0.0154745	0.0019
chr12	113145061	113145062	Crip2_NM_001347443_utr3_6_0_chr12_113145031_f,Crip2_NM_024223_utr3_6_0_chr12_113145031_f	11	+	476	11	1	0	0.000821
chr11	75706034	75706035	Crk_NM_001277219_utr3_2_0_chr11_75703374_f,Crk_NM_001277221_utr3_1_0_chr11_75703374_f,Crk_NM_133656_utr3_2_0_chr11_75703504_f	8	+	5055	8	1	0	0.000627
chr16	17485530	17485531	Crkl_NM_001277231_utr3_1_0_chr16_17483677_f,Crkl_NM_007764_utr3_2_0_chr16_17483796_f	4	+	3764	8	1	0.0247572	0.0029
chr16	17486879	17486880	Crkl_NM_001277231_utr3_1_0_chr16_17483677_f,Crkl_NM_007764_utr3_2_0_chr16_17483796_f	4	+	3764	4	1	0.0247572	0.0029
chr11	80046549	80046550	Crlf3_NM_001277106_utr3_0_0_chr11_80046493_r,Crlf3_NM_001277106_utr3_0_0_chr11_80046493_r,Crlf3_NM_018776_utr3_0_0_chr11_80046493_r	6	-	1169	9	1	0	0.00955
chr11	80046556	80046557	Crlf3_NM_001277106_utr3_0_0_chr11_80046493_r,Crlf3_NM_018776_utr3_0_0_chr11_80046493_r	13	-	1169	13	1	0	0.00623
chr11	80046695	80046696	Crlf3_NM_001277106_utr3_0_0_chr11_80046493_r,Crlf3_NM_001277106_utr3_0_0_chr11_80046493_r,Crlf3_NM_018776_utr3_0_0_chr11_80046493_r	12	-	1169	30	1	0	0.0088
chr11	80046703	80046704	Crlf3_NM_001277106_utr3_0_0_chr11_80046493_r,Crlf3_NM_018776_utr3_0_0_chr11_80046493_r	9	-	1169	31	1	0	0.00765
chr11	80046778	80046779	Crlf3_NM_001277106_utr3_0_0_chr11_80046493_r,Crlf3_NM_001277106_utr3_0_0_chr11_80046493_r,Crlf3_NM_018776_utr3_0_0_chr11_80046493_r	5	-	1169	5	1	0	0.00955
chr11	80046886	80046887	Crlf3_NM_001277106_utr3_0_0_chr11_80046493_r,Crlf3_NM_018776_utr3_0_0_chr11_80046493_r	9	-	1169	12	1	0	0.00262
chr2	145918340	145918341	Crnkl1_NM_025820_utr3_0_0_chr2_145917482_r	9	-	942	9	1	0.178104	0.000216
chr2	145918369	145918370	Crnkl1_NM_025820_utr3_0_0_chr2_145917482_r	6	-	942	10	1	0.178104	0.000216
chr2	145918419	145918420	Crnkl1_NM_025820_utr3_0_0_chr2_145917482_r	4	-	942	8	1	0.178104	0.000552
chr5	8966390	8966391	Crot_NM_023733_utr3_0_0_chr5_8966048_r	12	-	804	12	1	0	0.00533
chr5	8966722	8966723	Crot_NM_023733_utr3_0_0_chr5_8966048_r	5	-	804	5	1	0	0.00861
chr10	85131730	85131731	Cry1_NM_007771_utr3_0_0_chr10_85131700_r	14	-	608	14	1	0	0.00695
chr10	85132025	85132026	Cry1_NM_007771_utr3_0_0_chr10_85131700_r	7	-	608	7	1	0	0.00789
chr10	85132203	85132204	Cry1_NM_007771_utr3_0_0_chr10_85131700_r	7	-	608	7	1	0	0.00494
chr2	92403676	92403677	Cry2_NM_009963_utr3_0_0_chr2_92403647_r	7	-	2174	7	1	0	0.00129
chr10	43951592	43951593	Crybg1_NM_172393_utr3_0_0_chr10_43950307_r	6	-	1562	6	1	0.276752	0.000465
chr10	43951665	43951666	Crybg1_NM_172393_utr3_0_0_chr10_43950307_r	11	-	1562	15	1	0.276752	6.4e-05
chr10	43951669	43951670	Crybg1_NM_172393_utr3_0_0_chr10_43950307_r	19	-	1562	19	1	0.276752	1.08e-05
chr10	43951677	43951678	Crybg1_NM_172393_utr3_0_0_chr10_43950307_r	12	-	1562	12	1	0.276752	0.000647
chr10	43951692	43951693	Crybg1_NM_172393_utr3_0_0_chr10_43950307_r	5	-	1562	5	1	0.276752	0.000647
chr3	103057063	103057065	Csde1_NM_001161854_utr3_18_0_chr3_103056934_f,Csde1_NM_001310693_utr3_17_0_chr3_103056934_f,Csde1_NM_144901_utr3_19_0_chr3_103056934_f	16	+	1253	24	2	0.101165	7.9e-06
chr3	103057083	103057084	Csde1_NM_001161854_utr3_18_0_chr3_103056934_f,Csde1_NM_001310693_utr3_17_0_chr3_103056934_f,Csde1_NM_144901_utr3_19_0_chr3_103056934_f	12	+	1253	12	1	0.101165	6.34e-05
chr3	103057088	103057089	Csde1_NM_001161854_utr3_18_0_chr3_103056934_f,Csde1_NM_001310693_utr3_17_0_chr3_103056934_f,Csde1_NM_144901_utr3_19_0_chr3_103056934_f	5	+	1253	5	1	0.101165	0.00132
chr3	103057122	103057123	Csde1_NM_001161854_utr3_18_0_chr3_103056934_f,Csde1_NM_001310693_utr3_17_0_chr3_103056934_f,Csde1_NM_144901_utr3_19_0_chr3_103056934_f	9	+	1253	9	1	0.101165	0.000983
chr3	103057794	103057795	Csde1_NM_001161854_utr3_18_0_chr3_103056934_f,Csde1_NM_001310693_utr3_17_0_chr3_103056934_f,Csde1_NM_144901_utr3_19_0_chr3_103056934_f	12	+	1253	12	1	0.101165	0.000326
chr3	103057821	103057823	Csde1_NM_001161854_utr3_18_0_chr3_103056934_f,Csde1_NM_001310693_utr3_17_0_chr3_103056934_f,Csde1_NM_144901_utr3_19_0_chr3_103056934_f	20	+	1253	36	2	0.101165	3.78e-07
chr3	103057890	103057891	Csde1_NM_001161854_utr3_18_0_chr3_103056934_f,Csde1_NM_001310693_utr3_17_0_chr3_103056934_f,Csde1_NM_144901_utr3_19_0_chr3_103056934_f	12	+	1253	12	1	0.101165	6.34e-05
chr3	103058093	103058094	Csde1_NM_001161854_utr3_18_0_chr3_103056934_f,Csde1_NM_001310693_utr3_17_0_chr3_103056934_f,Csde1_NM_144901_utr3_19_0_chr3_103056934_f	6	+	1253	6	1	0.101165	0.000592
chr3	103058127	103058128	Csde1_NM_001161854_utr3_18_0_chr3_103056934_f,Csde1_NM_001310693_utr3_17_0_chr3_103056934_f,Csde1_NM_144901_utr3_19_0_chr3_103056934_f	8	+	1253	15	1	0.101165	0.000366
chr3	103058133	103058134	Csde1_NM_001161854_utr3_18_0_chr3_103056934_f,Csde1_NM_001310693_utr3_17_0_chr3_103056934_f,Csde1_NM_144901_utr3_19_0_chr3_103056934_f	22	+	1253	22	1	0.101165	3.48e-05
chr2	166946065	166946066	Cse1l_NM_023565_utr3_24_0_chr2_166945794_f	7	+	596	13	1	0.580335	0.000954
chr2	166946069	166946070	Cse1l_NM_023565_utr3_24_0_chr2_166945794_f	12	+	596	12	1	0.580335	8.83e-05
chr2	166946134	166946135	Cse1l_NM_023565_utr3_24_0_chr2_166945794_f	5	+	596	5	1	0.580335	0.000727
chr2	166946170	166946171	Cse1l_NM_023565_utr3_24_0_chr2_166945794_f	7	+	596	7	1	0.580335	0.000954
chr2	166946172	166946173	Cse1l_NM_023565_utr3_24_0_chr2_166945794_f	9	+	596	9	1	0.580335	0.0002
chr2	166946214	166946215	Cse1l_NM_023565_utr3_24_0_chr2_166945794_f	10	+	596	10	1	0.580335	0.0002
chr9	57626760	57626761	Csk_NM_001304761_utr3_0_0_chr9_57626646_r,Csk_NM_007783_utr3_0_0_chr9_57626646_r	5	-	675	5	1	0	0.00269
chr9	57626961	57626962	Csk_NM_001304761_utr3_0_0_chr9_57626646_r,Csk_NM_007783_utr3_0_0_chr9_57626646_r	6	-	675	6	1	0	0.00427
chr18	61587504	61587505	Csnk1a1_NM_001357498_utr3_10_0_chr18_61587434_f,Csnk1a1_NM_001357499_utr3_10_0_chr18_61587434_f,Csnk1a1_NM_001357500_utr3_9_0_chr18_61587434_f,Csnk1a1_NM_146087_utr3_9_0_chr18_61587434_f	13	+	2887	36	1	0.0126498	0.00106
chr18	61587506	61587507	Csnk1a1_NM_001357498_utr3_10_0_chr18_61587434_f,Csnk1a1_NM_001357499_utr3_10_0_chr18_61587434_f,Csnk1a1_NM_001357500_utr3_9_0_chr18_61587434_f,Csnk1a1_NM_146087_utr3_9_0_chr18_61587434_f	13	+	2887	36	1	0.0126498	0.00106
chr18	61587510	61587511	Csnk1a1_NM_001357498_utr3_10_0_chr18_61587434_f,Csnk1a1_NM_001357499_utr3_10_0_chr18_61587434_f,Csnk1a1_NM_001357500_utr3_9_0_chr18_61587434_f,Csnk1a1_NM_146087_utr3_9_0_chr18_61587434_f	22	+	2887	22	1	0.0126498	7.91e-05
chr18	61587683	61587684	Csnk1a1_NM_001357498_utr3_10_0_chr18_61587434_f,Csnk1a1_NM_001357499_utr3_10_0_chr18_61587434_f,Csnk1a1_NM_001357500_utr3_9_0_chr18_61587434_f,Csnk1a1_NM_146087_utr3_9_0_chr18_61587434_f	10	+	2887	16	1	0.0126498	0.000609
chr18	61587698	61587699	Csnk1a1_NM_001357498_utr3_10_0_chr18_61587434_f,Csnk1a1_NM_001357499_utr3_10_0_chr18_61587434_f,Csnk1a1_NM_001357500_utr3_9_0_chr18_61587434_f,Csnk1a1_NM_146087_utr3_9_0_chr18_61587434_f	8	+	2887	8	1	0.0126498	0.00135
chr18	61587721	61587722	Csnk1a1_NM_001357498_utr3_10_0_chr18_61587434_f,Csnk1a1_NM_001357499_utr3_10_0_chr18_61587434_f,Csnk1a1_NM_001357500_utr3_9_0_chr18_61587434_f,Csnk1a1_NM_146087_utr3_9_0_chr18_61587434_f	9	+	2887	9	1	0.0126498	0.00147
chr18	61587767	61587768	Csnk1a1_NM_001357498_utr3_10_0_chr18_61587434_f,Csnk1a1_NM_001357499_utr3_10_0_chr18_61587434_f,Csnk1a1_NM_001357500_utr3_9_0_chr18_61587434_f,Csnk1a1_NM_146087_utr3_9_0_chr18_61587434_f	14	+	2887	14	1	0.0126498	0.00135
chr18	61587776	61587777	Csnk1a1_NM_001357498_utr3_10_0_chr18_61587434_f,Csnk1a1_NM_001357499_utr3_10_0_chr18_61587434_f,Csnk1a1_NM_001357500_utr3_9_0_chr18_61587434_f,Csnk1a1_NM_146087_utr3_9_0_chr18_61587434_f	7	+	2887	7	1	0.0126498	0.00135
chr18	61587780	61587782	Csnk1a1_NM_001357498_utr3_10_0_chr18_61587434_f,Csnk1a1_NM_001357499_utr3_10_0_chr18_61587434_f,Csnk1a1_NM_001357500_utr3_9_0_chr18_61587434_f,Csnk1a1_NM_146087_utr3_9_0_chr18_61587434_f	6	+	2887	12	2	0.0126498	0.00123
chr18	61587809	61587810	Csnk1a1_NM_001357498_utr3_10_0_chr18_61587434_f,Csnk1a1_NM_001357499_utr3_10_0_chr18_61587434_f,Csnk1a1_NM_001357500_utr3_9_0_chr18_61587434_f,Csnk1a1_NM_146087_utr3_9_0_chr18_61587434_f	6	+	2887	11	1	0.0126498	0.00194
chr18	61587887	61587888	Csnk1a1_NM_001357498_utr3_10_0_chr18_61587434_f,Csnk1a1_NM_001357499_utr3_10_0_chr18_61587434_f,Csnk1a1_NM_001357500_utr3_9_0_chr18_61587434_f,Csnk1a1_NM_146087_utr3_9_0_chr18_61587434_f	7	+	2887	7	1	0.0126498	0.00272
chr18	61587925	61587926	Csnk1a1_NM_001357498_utr3_10_0_chr18_61587434_f,Csnk1a1_NM_001357499_utr3_10_0_chr18_61587434_f,Csnk1a1_NM_001357500_utr3_9_0_chr18_61587434_f,Csnk1a1_NM_146087_utr3_9_0_chr18_61587434_f	9	+	2887	13	1	0.0126498	0.000446
chr18	61587929	61587931	Csnk1a1_NM_001357498_utr3_10_0_chr18_61587434_f,Csnk1a1_NM_001357499_utr3_10_0_chr18_61587434_f,Csnk1a1_NM_001357500_utr3_9_0_chr18_61587434_f,Csnk1a1_NM_146087_utr3_9_0_chr18_61587434_f	16	+	2887	20	2	0.0126498	0.000654
chr18	61588117	61588118	Csnk1a1_NM_001357498_utr3_10_0_chr18_61587434_f,Csnk1a1_NM_001357499_utr3_10_0_chr18_61587434_f,Csnk1a1_NM_001357500_utr3_9_0_chr18_61587434_f,Csnk1a1_NM_146087_utr3_9_0_chr18_61587434_f	10	+	2887	10	1	0.0126498	0.000554
chr18	61588141	61588142	Csnk1a1_NM_001357498_utr3_10_0_chr18_61587434_f,Csnk1a1_NM_001357499_utr3_10_0_chr18_61587434_f,Csnk1a1_NM_001357500_utr3_9_0_chr18_61587434_f,Csnk1a1_NM_146087_utr3_9_0_chr18_61587434_f	8	+	2887	8	1	0.0126498	0.00213
chr18	61588168	61588169	Csnk1a1_NM_001357498_utr3_10_0_chr18_61587434_f,Csnk1a1_NM_001357499_utr3_10_0_chr18_61587434_f,Csnk1a1_NM_001357500_utr3_9_0_chr18_61587434_f,Csnk1a1_NM_146087_utr3_9_0_chr18_61587434_f	22	+	2887	22	1	0.0126498	0.00147
chr18	61588247	61588249	Csnk1a1_NM_001357498_utr3_10_0_chr18_61587434_f,Csnk1a1_NM_001357499_utr3_10_0_chr18_61587434_f,Csnk1a1_NM_001357500_utr3_9_0_chr18_61587434_f,Csnk1a1_NM_146087_utr3_9_0_chr18_61587434_f	12	+	2887	30	2	0.0126498	0.000121
chr18	61588262	61588263	Csnk1a1_NM_001357498_utr3_10_0_chr18_61587434_f,Csnk1a1_NM_001357499_utr3_10_0_chr18_61587434_f,Csnk1a1_NM_001357500_utr3_9_0_chr18_61587434_f,Csnk1a1_NM_146087_utr3_9_0_chr18_61587434_f	11	+	2887	11	1	0.0126498	0.00147
chr18	61588268	61588271	Csnk1a1_NM_001357498_utr3_10_0_chr18_61587434_f,Csnk1a1_NM_001357499_utr3_10_0_chr18_61587434_f,Csnk1a1_NM_001357500_utr3_9_0_chr18_61587434_f,Csnk1a1_NM_146087_utr3_9_0_chr18_61587434_f	21	+	2887	46	3	0.0126498	1.93e-05
chr18	61588276	61588277	Csnk1a1_NM_001357498_utr3_10_0_chr18_61587434_f,Csnk1a1_NM_001357499_utr3_10_0_chr18_61587434_f,Csnk1a1_NM_001357500_utr3_9_0_chr18_61587434_f,Csnk1a1_NM_146087_utr3_9_0_chr18_61587434_f	25	+	2887	25	1	0.0126498	0.000105
chr18	61590018	61590019	Csnk1a1_NM_001357498_utr3_10_0_chr18_61587434_f,Csnk1a1_NM_001357499_utr3_10_0_chr18_61587434_f,Csnk1a1_NM_001357500_utr3_9_0_chr18_61587434_f,Csnk1a1_NM_146087_utr3_9_0_chr18_61587434_f	6	+	2887	6	1	0.0126498	0.00142
chr11	120961801	120961802	Csnk1d_NM_027874_utr3_0_0_chr11_120961741_r,Csnk1d_NM_139059_utr3_0_0_chr11_120961741_r	4	-	2166	4	1	0.00827001	0.00173
chr15	79417890	79417892	Csnk1e_NM_001289898_utr3_0_0_chr15_79417852_r,Csnk1e_NM_013767_utr3_0_0_chr15_79417852_r	11	-	1336	15	2	0.0130921	8.4e-05
chr15	79417893	79417896	Csnk1e_NM_001289898_utr3_0_0_chr15_79417852_r,Csnk1e_NM_013767_utr3_0_0_chr15_79417852_r	16	-	1336	29	3	0.0130921	0.000348
chr15	79417905	79417906	Csnk1e_NM_001289898_utr3_0_0_chr15_79417852_r,Csnk1e_NM_013767_utr3_0_0_chr15_79417852_r	4	-	1336	4	1	0.0130921	0.00154
chr15	79418073	79418074	Csnk1e_NM_001289898_utr3_0_0_chr15_79417852_r,Csnk1e_NM_013767_utr3_0_0_chr15_79417852_r	12	-	1336	12	1	0.0130921	0.000885
chr15	79418442	79418443	Csnk1e_NM_001289898_utr3_0_0_chr15_79417852_r,Csnk1e_NM_013767_utr3_0_0_chr15_79417852_r	7	-	1336	13	1	0.0130921	0.00154
chr9	66041586	66041587	Csnk1g1_NM_173185_utr3_13_0_chr9_66039632_f	4	+	5383	4	1	0.0303325	0.00254
chr9	66042988	66042989	Csnk1g1_NM_173185_utr3_13_0_chr9_66039632_f	23	+	5383	23	1	0.0303325	0.000209
chr9	66043030	66043031	Csnk1g1_NM_173185_utr3_13_0_chr9_66039632_f	12	+	5383	21	1	0.0303325	0.00131
chr9	66043245	66043246	Csnk1g1_NM_173185_utr3_13_0_chr9_66039632_f	8	+	5383	8	1	0.0303325	0.000624
chr9	66043638	66043639	Csnk1g1_NM_173185_utr3_13_0_chr9_66039632_f	4	+	5383	4	1	0.0303325	0.00254
chr9	66043644	66043645	Csnk1g1_NM_173185_utr3_13_0_chr9_66039632_f	6	+	5383	14	1	0.0303325	0.00121
chr9	66043651	66043652	Csnk1g1_NM_173185_utr3_13_0_chr9_66039632_f	7	+	5383	7	1	0.0303325	0.00126
chr9	66043696	66043697	Csnk1g1_NM_173185_utr3_13_0_chr9_66039632_f	10	+	5383	10	1	0.0303325	0.00131
chr9	66043710	66043711	Csnk1g1_NM_173185_utr3_13_0_chr9_66039632_f	15	+	5383	15	1	0.0303325	0.00121
chr9	66044522	66044523	Csnk1g1_NM_173185_utr3_13_0_chr9_66039632_f	8	+	5383	10	1	0.0303325	0.000624
chr9	66044578	66044579	Csnk1g1_NM_173185_utr3_13_0_chr9_66039632_f	5	+	5383	5	1	0.0303325	0.00173
chr9	66044607	66044608	Csnk1g1_NM_173185_utr3_13_0_chr9_66039632_f	10	+	5383	10	1	0.0303325	0.000336
chr9	66044628	66044630	Csnk1g1_NM_173185_utr3_13_0_chr9_66039632_f	6	+	5383	9	2	0.0303325	0.00121
chr9	66044634	66044635	Csnk1g1_NM_173185_utr3_13_0_chr9_66039632_f	11	+	5383	16	1	0.0303325	0.000283
chr9	66044657	66044658	Csnk1g1_NM_173185_utr3_13_0_chr9_66039632_f	6	+	5383	10	1	0.0303325	0.00193
chr9	66044676	66044677	Csnk1g1_NM_173185_utr3_13_0_chr9_66039632_f	9	+	5383	9	1	0.0303325	0.00173
chr9	66044869	66044870	Csnk1g1_NM_173185_utr3_13_0_chr9_66039632_f	10	+	5383	10	1	0.0303325	0.000864
chr8	95448022	95448023	Csnk2a2_NM_009974_utr3_0_0_chr8_95446096_r	16	-	2323	16	1	0	0.000116
chr2	148838696	148838697	Cst9_NM_009979_utr3_2_0_chr2_148838530_f	25	+	208	35	1	0	0.0013
chrX	134086638	134086639	Cstf2_NM_001290398_utr3_13_0_chrX_134084232_f,Cstf2_NM_133196_utr3_13_0_chrX_134084232_f	10	+	2591	10	1	0.077113	0.000304
chrX	134086770	134086771	Cstf2_NM_001290398_utr3_13_0_chrX_134084232_f,Cstf2_NM_133196_utr3_13_0_chrX_134084232_f	8	+	2591	25	1	0.077113	0.00031
chrX	134086772	134086773	Cstf2_NM_001290398_utr3_13_0_chrX_134084232_f,Cstf2_NM_133196_utr3_13_0_chrX_134084232_f	8	+	2591	25	1	0.077113	0.00155
chrX	134086799	134086800	Cstf2_NM_001290398_utr3_13_0_chrX_134084232_f,Cstf2_NM_133196_utr3_13_0_chrX_134084232_f	18	+	2591	18	1	0.077113	0.000764
chr19	31085363	31085365	Cstf2t_NM_031249_utr3_0_0_chr19_31084965_f	11	+	1628	19	2	0.154423	0.000887
chr19	31085527	31085528	Cstf2t_NM_031249_utr3_0_0_chr19_31084965_f	4	+	1628	4	1	0.154423	0.000887
chr19	31085542	31085543	Cstf2t_NM_031249_utr3_0_0_chr19_31084965_f	13	+	1628	19	1	0.154423	0.00112
chr19	31085544	31085545	Cstf2t_NM_031249_utr3_0_0_chr19_31084965_f	13	+	1628	19	1	0.154423	1.5e-05
chr19	31085553	31085556	Cstf2t_NM_031249_utr3_0_0_chr19_31084965_f	22	+	1628	31	3	0.154423	5.45e-07
chr19	31085574	31085575	Cstf2t_NM_031249_utr3_0_0_chr19_31084965_f	7	+	1628	7	1	0.154423	0.000265
chr19	31085662	31085663	Cstf2t_NM_031249_utr3_0_0_chr19_31084965_f	6	+	1628	6	1	0.154423	0.000386
chr19	31086412	31086413	Cstf2t_NM_031249_utr3_0_0_chr19_31084965_f	4	+	1628	4	1	0.154423	0.00112
chr19	31086441	31086442	Cstf2t_NM_031249_utr3_0_0_chr19_31084965_f	9	+	1628	9	1	0.154423	0.00052
chr19	31086448	31086449	Cstf2t_NM_031249_utr3_0_0_chr19_31084965_f	15	+	1628	15	1	0.154423	0.000121
chr19	31086534	31086536	Cstf2t_NM_031249_utr3_0_0_chr19_31084965_f	22	+	1628	32	2	0.154423	4.88e-05
chr2	104665297	104665298	Cstf3_NM_145529_utr3_20_0_chr2_104664920_f	12	+	506	12	1	0	0.00371
chr2	104665366	104665367	Cstf3_NM_145529_utr3_20_0_chr2_104664920_f	9	+	506	9	1	0	0.00785
chr2	104665374	104665375	Cstf3_NM_145529_utr3_20_0_chr2_104664920_f	15	+	506	15	1	0	0.00883
chr2	104665383	104665384	Cstf3_NM_145529_utr3_20_0_chr2_104664920_f	7	+	506	7	1	0	0.00785
chr5	33247754	33247755	Ctbp1_NM_001198859_utr3_0_0_chr5_33247723_r,Ctbp1_NM_001198860_utr3_0_0_chr5_33247723_r,Ctbp1_NM_001198861_utr3_0_0_chr5_33247723_r,Ctbp1_NM_001310535_utr3_0_0_chr5_33247723_r,Ctbp1_NM_013502_utr3_0_0_chr5_33247723_r	5	-	777	5	1	0.0450221	0.000824
chr5	33247785	33247786	Ctbp1_NM_001198859_utr3_0_0_chr5_33247723_r,Ctbp1_NM_001198860_utr3_0_0_chr5_33247723_r,Ctbp1_NM_001198861_utr3_0_0_chr5_33247723_r,Ctbp1_NM_001310535_utr3_0_0_chr5_33247723_r,Ctbp1_NM_013502_utr3_0_0_chr5_33247723_r	15	-	777	15	1	0.0450221	0.000294
chr5	33248014	33248015	Ctbp1_NM_001198859_utr3_0_0_chr5_33247723_r,Ctbp1_NM_001198860_utr3_0_0_chr5_33247723_r,Ctbp1_NM_001198861_utr3_0_0_chr5_33247723_r,Ctbp1_NM_001310535_utr3_0_0_chr5_33247723_r,Ctbp1_NM_013502_utr3_0_0_chr5_33247723_r	4	-	777	12	1	0.0450221	0.00136
chr5	33248269	33248270	Ctbp1_NM_001198859_utr3_0_0_chr5_33247723_r,Ctbp1_NM_001198860_utr3_0_0_chr5_33247723_r,Ctbp1_NM_001198861_utr3_0_0_chr5_33247723_r,Ctbp1_NM_001310535_utr3_0_0_chr5_33247723_r,Ctbp1_NM_013502_utr3_0_0_chr5_33247723_r	6	-	777	6	1	0.0450221	0.00136
chr5	33248284	33248286	Ctbp1_NM_001198859_utr3_0_0_chr5_33247723_r,Ctbp1_NM_001198860_utr3_0_0_chr5_33247723_r,Ctbp1_NM_001198861_utr3_0_0_chr5_33247723_r,Ctbp1_NM_001310535_utr3_0_0_chr5_33247723_r,Ctbp1_NM_013502_utr3_0_0_chr5_33247723_r	15	-	777	25	2	0.0450221	0.000294
chr5	33248291	33248292	Ctbp1_NM_001198859_utr3_0_0_chr5_33247723_r,Ctbp1_NM_001198860_utr3_0_0_chr5_33247723_r,Ctbp1_NM_001198861_utr3_0_0_chr5_33247723_r,Ctbp1_NM_001310535_utr3_0_0_chr5_33247723_r,Ctbp1_NM_013502_utr3_0_0_chr5_33247723_r	9	-	777	9	1	0.0450221	0.000773
chr7	132987035	132987036	Ctbp2_NM_001170744_utr3_0_0_chr7_132987011_r,Ctbp2_NM_001347623_utr3_0_0_chr7_132987011_r,Ctbp2_NM_009980_utr3_0_0_chr7_132987011_r	10	-	1160	10	1	0.0843189	0.000888
chr10	126997302	126997303	Ctdsp2_NM_001113470_utr3_7_0_chr10_126996487_f,Ctdsp2_NM_146012_utr3_2_0_chr10_126996487_f	10	+	3489	10	1	0	0.000832
chr2	122010915	122010916	Ctdspl2_NM_001290991_utr3_12_0_chr2_122010629_f,Ctdspl2_NM_001290992_utr3_12_0_chr2_122010629_f,Ctdspl2_NM_212450_utr3_12_0_chr2_122010629_f	7	+	4698	7	1	0.146794	0.00091
chr2	122011292	122011293	Ctdspl2_NM_001290991_utr3_12_0_chr2_122010629_f,Ctdspl2_NM_001290992_utr3_12_0_chr2_122010629_f,Ctdspl2_NM_212450_utr3_12_0_chr2_122010629_f	5	+	4698	5	1	0.146794	0.00108
chr2	122012334	122012335	Ctdspl2_NM_001290991_utr3_12_0_chr2_122010629_f,Ctdspl2_NM_001290992_utr3_12_0_chr2_122010629_f,Ctdspl2_NM_212450_utr3_12_0_chr2_122010629_f	6	+	4698	9	1	0.146794	0.000324
chr15	39086895	39086897	Cthrc1_NM_026778_utr3_3_0_chr15_39086766_f	22	+	354	42	2	0	0.000207
chr18	35254034	35254035	Ctnna1_NM_009818_utr3_17_0_chr18_35253893_f	15	+	883	15	1	0.0413589	0.000221
chr9	120959540	120959541	Ctnnb1_NM_001165902_utr3_14_0_chr9_120959518_f,Ctnnb1_NM_007614_utr3_14_0_chr9_120959518_f	5	+	990	5	1	0.308202	0.00122
chr9	120959613	120959614	Ctnnb1_NM_001165902_utr3_14_0_chr9_120959518_f,Ctnnb1_NM_007614_utr3_14_0_chr9_120959518_f	13	+	990	21	1	0.308202	5.21e-05
chr9	120959624	120959625	Ctnnb1_NM_001165902_utr3_14_0_chr9_120959518_f,Ctnnb1_NM_007614_utr3_14_0_chr9_120959518_f	23	+	990	27	1	0.308202	0.000754
chr9	120959669	120959670	Ctnnb1_NM_001165902_utr3_14_0_chr9_120959518_f,Ctnnb1_NM_007614_utr3_14_0_chr9_120959518_f	47	+	990	47	1	0.308202	2.65e-05
chr9	120959683	120959684	Ctnnb1_NM_001165902_utr3_14_0_chr9_120959518_f,Ctnnb1_NM_007614_utr3_14_0_chr9_120959518_f	13	+	990	17	1	0.308202	3.91e-05
chr9	120959698	120959701	Ctnnb1_NM_001165902_utr3_14_0_chr9_120959518_f,Ctnnb1_NM_007614_utr3_14_0_chr9_120959518_f	22	+	990	41	3	0.308202	5.55e-07
chr9	120959711	120959713	Ctnnb1_NM_001165902_utr3_14_0_chr9_120959518_f,Ctnnb1_NM_007614_utr3_14_0_chr9_120959518_f	12	+	990	31	2	0.308202	7.45e-05
chr9	120959721	120959723	Ctnnb1_NM_001165902_utr3_14_0_chr9_120959518_f,Ctnnb1_NM_007614_utr3_14_0_chr9_120959518_f	25	+	990	36	2	0.308202	1.91e-05
chr9	120959741	120959742	Ctnnb1_NM_001165902_utr3_14_0_chr9_120959518_f,Ctnnb1_NM_007614_utr3_14_0_chr9_120959518_f	8	+	990	8	1	0.308202	0.00148
chr9	120959750	120959751	Ctnnb1_NM_001165902_utr3_14_0_chr9_120959518_f,Ctnnb1_NM_007614_utr3_14_0_chr9_120959518_f	27	+	990	27	1	0.308202	6.96e-06
chr9	120959757	120959758	Ctnnb1_NM_001165902_utr3_14_0_chr9_120959518_f,Ctnnb1_NM_007614_utr3_14_0_chr9_120959518_f	14	+	990	14	1	0.308202	0.000102
chr9	120960018	120960019	Ctnnb1_NM_001165902_utr3_14_0_chr9_120959518_f,Ctnnb1_NM_007614_utr3_14_0_chr9_120959518_f	23	+	990	23	1	0.308202	1.45e-05
chr9	120960040	120960042	Ctnnb1_NM_001165902_utr3_14_0_chr9_120959518_f,Ctnnb1_NM_007614_utr3_14_0_chr9_120959518_f	20	+	990	32	2	0.308202	0.00022
chr9	120960046	120960052	Ctnnb1_NM_001165902_utr3_14_0_chr9_120959518_f,Ctnnb1_NM_007614_utr3_14_0_chr9_120959518_f	51	+	990	127	6	0.308202	0.000296
chr9	120960082	120960083	Ctnnb1_NM_001165902_utr3_14_0_chr9_120959518_f,Ctnnb1_NM_007614_utr3_14_0_chr9_120959518_f	7	+	990	7	1	0.308202	0.000787
chr9	120960084	120960085	Ctnnb1_NM_001165902_utr3_14_0_chr9_120959518_f,Ctnnb1_NM_007614_utr3_14_0_chr9_120959518_f	15	+	990	18	1	0.308202	2.67e-05
chr9	120960087	120960091	Ctnnb1_NM_001165902_utr3_14_0_chr9_120959518_f,Ctnnb1_NM_007614_utr3_14_0_chr9_120959518_f	19	+	990	50	4	0.308202	0.000148
chr9	120960102	120960104	Ctnnb1_NM_001165902_utr3_14_0_chr9_120959518_f,Ctnnb1_NM_007614_utr3_14_0_chr9_120959518_f	24	+	990	31	2	0.308202	7.37e-05
chr9	120960106	120960111	Ctnnb1_NM_001165902_utr3_14_0_chr9_120959518_f,Ctnnb1_NM_007614_utr3_14_0_chr9_120959518_f	47	+	990	171	5	0.308202	1.11e-16
chr9	120960118	120960121	Ctnnb1_NM_001165902_utr3_14_0_chr9_120959518_f,Ctnnb1_NM_007614_utr3_14_0_chr9_120959518_f	99	+	990	133	3	0.308202	4.37e-13
chr9	120960124	120960125	Ctnnb1_NM_001165902_utr3_14_0_chr9_120959518_f,Ctnnb1_NM_007614_utr3_14_0_chr9_120959518_f	85	+	990	85	1	0.308202	5.28e-09
chr9	120960147	120960149	Ctnnb1_NM_001165902_utr3_14_0_chr9_120959518_f,Ctnnb1_NM_007614_utr3_14_0_chr9_120959518_f	7	+	990	18	2	0.308202	0.000754
chr9	120960155	120960156	Ctnnb1_NM_001165902_utr3_14_0_chr9_120959518_f,Ctnnb1_NM_007614_utr3_14_0_chr9_120959518_f	20	+	990	33	1	0.308202	1.2e-05
chr9	120960157	120960159	Ctnnb1_NM_001165902_utr3_14_0_chr9_120959518_f,Ctnnb1_NM_007614_utr3_14_0_chr9_120959518_f	19	+	990	33	2	0.308202	0.00012
chr9	120960188	120960189	Ctnnb1_NM_001165902_utr3_14_0_chr9_120959518_f,Ctnnb1_NM_007614_utr3_14_0_chr9_120959518_f	15	+	990	15	1	0.308202	6.92e-05
chr9	120960190	120960191	Ctnnb1_NM_001165902_utr3_14_0_chr9_120959518_f,Ctnnb1_NM_007614_utr3_14_0_chr9_120959518_f	16	+	990	16	1	0.308202	6.92e-05
chr9	120960196	120960197	Ctnnb1_NM_001165902_utr3_14_0_chr9_120959518_f,Ctnnb1_NM_007614_utr3_14_0_chr9_120959518_f	9	+	990	9	1	0.308202	0.000636
chr9	120960206	120960207	Ctnnb1_NM_001165902_utr3_14_0_chr9_120959518_f,Ctnnb1_NM_007614_utr3_14_0_chr9_120959518_f	9	+	990	14	1	0.308202	0.000636
chr9	120960238	120960240	Ctnnb1_NM_001165902_utr3_14_0_chr9_120959518_f,Ctnnb1_NM_007614_utr3_14_0_chr9_120959518_f	32	+	990	38	2	0.308202	2.65e-05
chr9	120960279	120960284	Ctnnb1_NM_001165902_utr3_14_0_chr9_120959518_f,Ctnnb1_NM_007614_utr3_14_0_chr9_120959518_f	27	+	990	112	5	0.308202	0.000151
chr9	120960314	120960315	Ctnnb1_NM_001165902_utr3_14_0_chr9_120959518_f,Ctnnb1_NM_007614_utr3_14_0_chr9_120959518_f	19	+	990	25	1	0.308202	0.000487
chr9	120960320	120960324	Ctnnb1_NM_001165902_utr3_14_0_chr9_120959518_f,Ctnnb1_NM_007614_utr3_14_0_chr9_120959518_f	34	+	990	68	4	0.308202	7.48e-07
chr9	120960335	120960338	Ctnnb1_NM_001165902_utr3_14_0_chr9_120959518_f,Ctnnb1_NM_007614_utr3_14_0_chr9_120959518_f	25	+	990	53	3	0.308202	0.00122
chr9	120960346	120960347	Ctnnb1_NM_001165902_utr3_14_0_chr9_120959518_f,Ctnnb1_NM_007614_utr3_14_0_chr9_120959518_f	11	+	990	11	1	0.308202	0.000487
chr9	120960391	120960393	Ctnnb1_NM_001165902_utr3_14_0_chr9_120959518_f,Ctnnb1_NM_007614_utr3_14_0_chr9_120959518_f	43	+	990	61	2	0.308202	3.92e-08
chr9	120960415	120960416	Ctnnb1_NM_001165902_utr3_14_0_chr9_120959518_f,Ctnnb1_NM_007614_utr3_14_0_chr9_120959518_f	18	+	990	18	1	0.308202	2.65e-05
chr9	120960417	120960418	Ctnnb1_NM_001165902_utr3_14_0_chr9_120959518_f,Ctnnb1_NM_007614_utr3_14_0_chr9_120959518_f	13	+	990	17	1	0.308202	0.000958
chr9	120960426	120960430	Ctnnb1_NM_001165902_utr3_14_0_chr9_120959518_f,Ctnnb1_NM_007614_utr3_14_0_chr9_120959518_f	21	+	990	59	4	0.308202	0.000754
chr9	120960454	120960455	Ctnnb1_NM_001165902_utr3_14_0_chr9_120959518_f,Ctnnb1_NM_007614_utr3_14_0_chr9_120959518_f	14	+	990	14	1	0.308202	0.000245
chr9	120960468	120960470	Ctnnb1_NM_001165902_utr3_14_0_chr9_120959518_f,Ctnnb1_NM_007614_utr3_14_0_chr9_120959518_f	36	+	990	50	2	0.308202	9.95e-06
chr9	120960479	120960481	Ctnnb1_NM_001165902_utr3_14_0_chr9_120959518_f,Ctnnb1_NM_007614_utr3_14_0_chr9_120959518_f	217	+	990	240	2	0.308202	4e-15
chr4	149564719	149564720	Ctnnbip1_NM_001141930_utr3_3_0_chr4_149564264_f,Ctnnbip1_NM_023465_utr3_4_0_chr4_149564264_f	7	+	2174	7	1	0	0.000516
chr2	84600837	84600838	Ctnnd1_NM_001085448_utr3_0_0_chr2_84600781_r,Ctnnd1_NM_001085449_utr3_0_0_chr2_84600781_r,Ctnnd1_NM_001085450_utr3_0_0_chr2_84600781_r,Ctnnd1_NM_001085453_utr3_0_0_chr2_84600781_r,Ctnnd1_NM_001355064_utr3_0_0_chr2_84600781_r,Ctnnd1_NM_001355065_utr3_0_0_chr2_84600781_r,Ctnnd1_NM_001355066_utr3_0_0_chr2_84600781_r,Ctnnd1_NM_001355067_utr3_0_0_chr2_84600781_r,Ctnnd1_NM_007615_utr3_0_0_chr2_84600781…	8	-	2111	10	1	0.00828568	0.00171
chr11	73183648	73183649	Ctns_NM_031251_utr3_0_0_chr11_73183133_r	5	-	1785	10	1	0.0945921	0.000889
chr11	73183654	73183656	Ctns_NM_031251_utr3_0_0_chr11_73183133_r	13	-	1785	17	2	0.0945921	0.000487
chr4	120539959	120539960	Ctps_NM_001355491_utr3_0_0_chr4_120539868_r,Ctps_NM_016748_utr3_0_0_chr4_120539868_r	14	-	787	16	1	0.022225	2.44e-05
chr4	120539963	120539964	Ctps_NM_001355491_utr3_0_0_chr4_120539868_r,Ctps_NM_016748_utr3_0_0_chr4_120539868_r	5	-	787	5	1	0.022225	0.000862
chr4	120540007	120540008	Ctps_NM_001355491_utr3_0_0_chr4_120539868_r,Ctps_NM_016748_utr3_0_0_chr4_120539868_r	5	-	787	5	1	0.022225	0.00139
chr4	120540013	120540014	Ctps_NM_001355491_utr3_0_0_chr4_120539868_r,Ctps_NM_016748_utr3_0_0_chr4_120539868_r	5	-	787	5	1	0.022225	0.000855
chr4	120540575	120540576	Ctps_NM_001355491_utr3_0_0_chr4_120539868_r,Ctps_NM_016748_utr3_0_0_chr4_120539868_r	4	-	787	4	1	0.022225	0.00149
chr13	64363826	64363827	Ctsl_NM_009984_utr3_0_0_chr13_64361890_r	7	-	2208	7	1	0	0.00855
chr13	64363910	64363911	Ctsl_NM_009984_utr3_0_0_chr13_64361890_r	4	-	2208	4	1	0	0.00855
chr13	64363933	64363934	Ctsl_NM_009984_utr3_0_0_chr13_64361890_r	9	-	2208	14	1	0	0.00328
chr13	64363942	64363943	Ctsl_NM_009984_utr3_0_0_chr13_64361890_r	34	-	2208	45	1	0	0.00026
chr13	64363950	64363951	Ctsl_NM_009984_utr3_0_0_chr13_64361890_r	11	-	2208	11	1	0	0.00183
chr13	64363959	64363960	Ctsl_NM_009984_utr3_0_0_chr13_64361890_r	7	-	2208	7	1	0	0.00411
chr13	64364027	64364028	Ctsl_NM_009984_utr3_0_0_chr13_64361890_r	10	-	2208	13	1	0	0.00331
chr3	105001950	105001951	Cttnbp2nl_NM_001163332_utr3_0_0_chr3_105001915_r,Cttnbp2nl_NM_001163333_utr3_0_0_chr3_105001915_r,Cttnbp2nl_NM_030249_utr3_0_0_chr3_105001915_r	5	-	2735	5	1	0	0.000379
chr6	47526019	47526020	Cul1_NM_001355550_utr3_21_0_chr6_47525635_f,Cul1_NM_001355551_utr3_21_0_chr6_47525635_f,Cul1_NM_012042_utr3_21_0_chr6_47525635_f	8	+	510	8	1	0	0.000851
chr18	3435254	3435255	Cul2_NM_029402_utr3_20_0_chr18_3434976_f	6	+	1725	6	1	0	0.00193
chr18	3435276	3435277	Cul2_NM_029402_utr3_20_0_chr18_3434976_f	8	+	1725	8	1	0	0.00231
chr18	3435287	3435288	Cul2_NM_029402_utr3_20_0_chr18_3434976_f	4	+	1725	4	1	0	0.00291
chr1	80266908	80266909	Cul3_NM_001313728_utr3_0_0_chr1_80264923_r,Cul3_NM_016716_utr3_0_0_chr1_80264923_r	8	-	2233	19	1	0	0.000549
chr8	13146841	13146842	Cul4a_NM_146207_utr3_19_0_chr8_13146628_f	15	+	1312	15	1	0	0.00505
chr8	13146847	13146848	Cul4a_NM_146207_utr3_19_0_chr8_13146628_f	17	+	1312	30	1	0	0.0097
chr8	13147294	13147295	Cul4a_NM_146207_utr3_19_0_chr8_13146628_f	31	+	1312	31	1	0	0.00136
chr8	13147557	13147558	Cul4a_NM_146207_utr3_19_0_chr8_13146628_f	18	+	1312	18	1	0	0.0023
chr8	13147572	13147573	Cul4a_NM_146207_utr3_19_0_chr8_13146628_f	15	+	1312	15	1	0	0.00667
chr8	13147651	13147652	Cul4a_NM_146207_utr3_19_0_chr8_13146628_f	11	+	1312	11	1	0	0.00842
chr8	13147854	13147855	Cul4a_NM_146207_utr3_19_0_chr8_13146628_f	9	+	1312	9	1	0	0.00799
chr8	13147880	13147881	Cul4a_NM_146207_utr3_19_0_chr8_13146628_f	17	+	1312	17	1	0	0.00317
chrX	38531646	38531647	Cul4b_NM_001110142_utr3_0_0_chrX_38531621_r,Cul4b_NM_028288_utr3_0_0_chrX_38531621_r	11	-	2012	11	1	0	0.000648
chrX	38531756	38531757	Cul4b_NM_001110142_utr3_0_0_chrX_38531621_r,Cul4b_NM_028288_utr3_0_0_chrX_38531621_r	14	-	2012	14	1	0	0.00318
chrX	38532167	38532168	Cul4b_NM_001110142_utr3_0_0_chrX_38531621_r,Cul4b_NM_028288_utr3_0_0_chrX_38531621_r	7	-	2012	13	1	0	0.00318
chrX	38532524	38532525	Cul4b_NM_001110142_utr3_0_0_chrX_38531621_r,Cul4b_NM_028288_utr3_0_0_chrX_38531621_r	6	-	2012	6	1	0	0.00584
chrX	38532529	38532530	Cul4b_NM_001110142_utr3_0_0_chrX_38531621_r,Cul4b_NM_028288_utr3_0_0_chrX_38531621_r	12	-	2012	12	1	0	0.00539
chrX	38532755	38532756	Cul4b_NM_001110142_utr3_0_0_chrX_38531621_r,Cul4b_NM_028288_utr3_0_0_chrX_38531621_r	7	-	2012	11	1	0	0.00192
chr9	14510398	14510399	Cwc15_NM_023153_utr3_6_0_chr9_14510330_f	5	+	291	5	1	0	0.00315
chr11	97745949	97745950	Cwc25_NM_026186_utr3_0_0_chr11_97745470_r	4	-	1885	4	1	0.0660917	0.00199
chr9	3478574	3478575	Cwf19l2_NM_027545_utr3_17_0_chr9_3477961_f	6	+	1276	6	1	0	0.00322
chr9	3478625	3478626	Cwf19l2_NM_027545_utr3_17_0_chr9_3477961_f	6	+	1276	6	1	0	0.00261
chr9	3478873	3478874	Cwf19l2_NM_027545_utr3_17_0_chr9_3477961_f	4	+	1276	8	1	0	0.00662
chr9	3479089	3479090	Cwf19l2_NM_027545_utr3_17_0_chr9_3477961_f	11	+	1276	11	1	0	0.000561
chr1	128588229	128588230	Cxcr4_NM_001356509_utr3_0_0_chr1_128588199_r,Cxcr4_NM_009911_utr3_0_0_chr1_128588199_r	8	-	644	13	1	0	0.00056
chr18	74221329	74221330	Cxxc1_NM_028868_utr3_14_0_chr18_74221206_f	15	+	286	21	1	0	0.00618
chr18	74221341	74221342	Cxxc1_NM_028868_utr3_14_0_chr18_74221206_f	7	+	286	7	1	0	0.00662
chr18	35860856	35860857	Cxxc5_NM_001357458_utr3_2_0_chr18_35860695_f,Cxxc5_NM_001357459_utr3_2_0_chr18_35860695_f,Cxxc5_NM_133687_utr3_2_0_chr18_35860695_f	9	+	999	9	1	0	0.0048
chr18	35860866	35860868	Cxxc5_NM_001357458_utr3_2_0_chr18_35860695_f,Cxxc5_NM_001357459_utr3_2_0_chr18_35860695_f,Cxxc5_NM_133687_utr3_2_0_chr18_35860695_f	15	+	999	23	2	0	0.00172
chr18	35861164	35861165	Cxxc5_NM_001357458_utr3_2_0_chr18_35860695_f,Cxxc5_NM_001357459_utr3_2_0_chr18_35860695_f,Cxxc5_NM_133687_utr3_2_0_chr18_35860695_f	10	+	999	10	1	0	0.00537
chr18	35861224	35861225	Cxxc5_NM_001357458_utr3_2_0_chr18_35860695_f,Cxxc5_NM_001357459_utr3_2_0_chr18_35860695_f,Cxxc5_NM_133687_utr3_2_0_chr18_35860695_f	7	+	999	7	1	0	0.00922
chr18	35861425	35861426	Cxxc5_NM_001357458_utr3_2_0_chr18_35860695_f,Cxxc5_NM_001357459_utr3_2_0_chr18_35860695_f,Cxxc5_NM_133687_utr3_2_0_chr18_35860695_f	16	+	999	16	1	0	0.00362
chr18	35861652	35861653	Cxxc5_NM_001357458_utr3_2_0_chr18_35860695_f,Cxxc5_NM_001357459_utr3_2_0_chr18_35860695_f,Cxxc5_NM_133687_utr3_2_0_chr18_35860695_f	13	+	999	13	1	0	0.00701
chr11	105935244	105935245	Cyb561_NM_001356374_utr3_0_0_chr11_105933702_r,Cyb561_NM_007805_utr3_0_0_chr11_105933702_r	6	-	1673	6	1	0.0418197	0.000521
chr2	76354033	76354034	Cyct_NM_009989_utr3_0_0_chr2_76353942_r	6	-	146	6	1	0	0.0069
chr15	76643829	76643830	Cyhr1_NM_019396_utr3_0_0_chr15_76643395_r	5	-	2788	5	1	0.00960293	0.00105
chr5	4082900	4082901	Cyp51_NM_020010_utr3_0_0_chr5_4080674_r	9	-	2451	13	1	0.065102	0.00117
chr5	4082906	4082907	Cyp51_NM_020010_utr3_0_0_chr5_4080674_r	9	-	2451	14	1	0.065102	0.00102
chr19	18718233	18718234	D030056L22Rik_NM_177640_utr3_1_0_chr19_18717375_f	14	+	1054	14	1	0	0.00816
chr19	18718289	18718291	D030056L22Rik_NM_177640_utr3_1_0_chr19_18717375_f	18	+	1054	34	2	0	0.00396
[truncated: 9,823 more rows]

## Sheet: Replicated 5' UTR peaks
Chr	Start	End	Interval	Maximum_Height	Strand	Interval_Length	Tag_Count	Span_Size	RPKM	p-Value
chr7	34285556	34285557	4931406P16Rik_NM_172741_utr5_12_0_chr7_34285197_r	4	-	413	8	1	0	0.000944
chr13	80883642	80883643	Arrdc3_NM_001042591_utr5_0_0_chr13_80883422_f	6	+	228	6	1	0	0.00927
chr13	24802067	24802068	BC005537_NM_024473_utr5_0_0_chr13_24801657_f	4	+	1724	4	1	0.0311601	1.98e-05
chr13	24802333	24802334	BC005537_NM_024473_utr5_0_0_chr13_24801657_f	8	+	1724	8	1	0.0311601	1.64e-05
chr13	24802567	24802568	BC005537_NM_024473_utr5_0_0_chr13_24801657_f	5	+	1724	9	1	0.0311601	3.76e-05
chr13	24802606	24802607	BC005537_NM_024473_utr5_0_0_chr13_24801657_f	7	+	1724	7	1	0.0311601	3.76e-05
chr13	24802652	24802654	BC005537_NM_024473_utr5_0_0_chr13_24801657_f	8	+	1724	14	2	0.0311601	1.98e-05
chr13	24802661	24802662	BC005537_NM_024473_utr5_0_0_chr13_24801657_f	6	+	1724	6	1	0.0311601	1.98e-05
chr13	24802709	24802710	BC005537_NM_024473_utr5_0_0_chr13_24801657_f	59	+	1724	59	1	0.0311601	3.39e-13
chr13	24802802	24802803	BC005537_NM_024473_utr5_0_0_chr13_24801657_f	14	+	1724	20	1	0.0311601	7.79e-06
chr13	24802806	24802807	BC005537_NM_024473_utr5_0_0_chr13_24801657_f	6	+	1724	6	1	0.0311601	3.76e-05
chr13	24802820	24802821	BC005537_NM_024473_utr5_0_0_chr13_24801657_f	9	+	1724	17	1	0.0311601	2.64e-08
chr13	24802835	24802837	BC005537_NM_024473_utr5_0_0_chr13_24801657_f	8	+	1724	13	2	0.0311601	1.75e-07
chr13	24802846	24802847	BC005537_NM_024473_utr5_0_0_chr13_24801657_f	25	+	1724	30	1	0.0311601	8.15e-13
chr13	24802851	24802852	BC005537_NM_024473_utr5_0_0_chr13_24801657_f	21	+	1724	26	1	0.0311601	1.83e-09
chr13	24802863	24802870	BC005537_NM_024473_utr5_0_0_chr13_24801657_f	16	+	1724	68	7	0.0311601	1.6e-06
chr13	24802914	24802917	BC005537_NM_024473_utr5_0_0_chr13_24801657_f	12	+	1724	21	3	0.0311601	2.74e-08
chr13	24802922	24802923	BC005537_NM_024473_utr5_0_0_chr13_24801657_f	28	+	1724	29	1	0.0311601	7.27e-14
chr13	24802925	24802926	BC005537_NM_024473_utr5_0_0_chr13_24801657_f	6	+	1724	6	1	0.0311601	7.39e-06
chr13	24802962	24802963	BC005537_NM_024473_utr5_0_0_chr13_24801657_f	11	+	1724	11	1	0.0311601	1.98e-05
chr13	24802990	24802992	BC005537_NM_024473_utr5_0_0_chr13_24801657_f	9	+	1724	13	2	0.0311601	4.84e-07
chr13	24802993	24802994	BC005537_NM_024473_utr5_0_0_chr13_24801657_f	7	+	1724	7	1	0.0311601	1.98e-05
chr13	24803021	24803022	BC005537_NM_024473_utr5_0_0_chr13_24801657_f	11	+	1724	30	1	0.0311601	1.6e-06
chr13	24803023	24803025	BC005537_NM_024473_utr5_0_0_chr13_24801657_f	11	+	1724	30	2	0.0311601	1.05e-07
chr13	24803030	24803031	BC005537_NM_024473_utr5_0_0_chr13_24801657_f	6	+	1724	6	1	0.0311601	7.39e-06
chr13	24803045	24803048	BC005537_NM_024473_utr5_0_0_chr13_24801657_f	17	+	1724	42	3	0.0311601	5.61e-07
chr13	24803050	24803051	BC005537_NM_024473_utr5_0_0_chr13_24801657_f	16	+	1724	16	1	0.0311601	4.28e-08
chr13	24803058	24803060	BC005537_NM_024473_utr5_0_0_chr13_24801657_f	30	+	1724	41	2	0.0311601	1.59e-12
chr13	24803072	24803073	BC005537_NM_024473_utr5_0_0_chr13_24801657_f	11	+	1724	20	1	0.0311601	1.98e-05
chr13	24803084	24803086	BC005537_NM_024473_utr5_0_0_chr13_24801657_f	8	+	1724	15	2	0.0311601	8.64e-08
chr13	24803095	24803097	BC005537_NM_024473_utr5_0_0_chr13_24801657_f	32	+	1724	39	2	0.0311601	1.05e-07
chr13	24803134	24803135	BC005537_NM_024473_utr5_0_0_chr13_24801657_f	6	+	1724	6	1	0.0311601	3.17e-06
chr13	24803151	24803153	BC005537_NM_024473_utr5_0_0_chr13_24801657_f	14	+	1724	18	2	0.0311601	3.76e-05
chr13	24803201	24803202	BC005537_NM_024473_utr5_0_0_chr13_24801657_f	8	+	1724	8	1	0.0311601	3.76e-05
chr13	24803235	24803236	BC005537_NM_024473_utr5_0_0_chr13_24801657_f	10	+	1724	10	1	0.0311601	1.44e-06
chr13	24803244	24803245	BC005537_NM_024473_utr5_0_0_chr13_24801657_f	6	+	1724	6	1	0.0311601	7.39e-06
chr13	24803248	24803249	BC005537_NM_024473_utr5_0_0_chr13_24801657_f	12	+	1724	12	1	0.0311601	1.98e-05
chr13	24803255	24803258	BC005537_NM_024473_utr5_0_0_chr13_24801657_f	6	+	1724	15	3	0.0311601	3.2e-08
chr13	24803295	24803298	BC005537_NM_024473_utr5_0_0_chr13_24801657_f	10	+	1724	22	3	0.0311601	1.12e-06
chr13	24803335	24803337	BC005537_NM_024473_utr5_0_0_chr13_24801657_f	12	+	1724	16	2	0.0311601	7.79e-06
chr10	20318010	20318011	Bclaf1_NM_001025392_utr5_1_0_chr10_20318008_f,Bclaf1_NM_001025393_utr5_1_0_chr10_20318008_f,Bclaf1_NM_153787_utr5_1_0_chr10_20318008_f	9	+	104	9	1	0	0.00416
chr1	179960796	179960797	Cdc42bpa_NM_001346804_utr5_0_0_chr1_179960760_f,Cdc42bpa_NM_001346805_utr5_0_0_chr1_179960760_f	6	+	350	6	1	0	0.00655
chr3	90506480	90506481	Chtop_NM_001293780_utr5_2_0_chr3_90506252_r,Chtop_NM_001293781_utr5_2_0_chr3_90506252_r,Chtop_NM_001293782_utr5_3_0_chr3_90506252_r,Chtop_NM_023215_utr5_3_0_chr3_90506252_r	10	-	1375	10	1	0	0.00734
chr3	90506795	90506798	Chtop_NM_001293780_utr5_2_0_chr3_90506252_r,Chtop_NM_001293781_utr5_2_0_chr3_90506252_r,Chtop_NM_001293782_utr5_3_0_chr3_90506252_r,Chtop_NM_023215_utr5_3_0_chr3_90506252_r	14	-	1375	31	3	0	9.67e-05
chr3	90507046	90507048	Chtop_NM_001293780_utr5_2_0_chr3_90506252_r,Chtop_NM_001293781_utr5_2_0_chr3_90506252_r,Chtop_NM_001293782_utr5_3_0_chr3_90506252_r,Chtop_NM_023215_utr5_3_0_chr3_90506252_r	11	-	1375	17	2	0	0.00638
chr9	113835249	113835250	Clasp2_NM_001286601_utr5_2_0_chr9_113835175_f	8	+	80	8	1	0	0.00328
chr3	103029113	103029114	Csde1_NM_001161854_utr5_1_0_chr3_103028789_f,Csde1_NM_001310693_utr5_1_0_chr3_103028789_f,Csde1_NM_144901_utr5_1_0_chr3_103028789_f	8	+	424	8	1	0.21283	1.96e-06
chr10	81176687	81176688	Eef2_NM_007907_utr5_0_0_chr10_81176631_f	7	+	96	7	1	2.05917	3.36e-06
chr2	34822842	34822843	Fbxw2_NM_001164770_utr5_5_0_chr2_34822661_r	7	-	315	7	1	0.0555272	7.17e-06
chr13	111487928	111487929	Gpbp1_NM_001122963_utr5_10_0_chr13_111487423_r,Gpbp1_NM_028487_utr5_11_0_chr13_111487423_r	13	-	948	18	1	0	0.00502
chr13	111487944	111487945	Gpbp1_NM_001122963_utr5_10_0_chr13_111487423_r,Gpbp1_NM_028487_utr5_11_0_chr13_111487423_r	10	-	948	10	1	0	0.00164
chr13	111488080	111488081	Gpbp1_NM_001122963_utr5_10_0_chr13_111487423_r,Gpbp1_NM_028487_utr5_11_0_chr13_111487423_r	12	-	948	16	1	0	0.000211
chr8	120489027	120489028	Gse1_NM_198671_utr5_0_0_chr8_120488866_f	5	+	249	5	1	1.95871	3.62e-06
chr3	96269701	96269702	Hist2h2bb_NM_175666_utr5_0_0_chr3_96269700_f	7	+	52	7	1	0	0.009
chr15	79687174	79687176	Josd1_NM_028792_utr5_3_0_chr15_79686918_r	14	-	955	25	2	0.0743843	1.99e-06
chr15	79687179	79687180	Josd1_NM_028792_utr5_3_0_chr15_79686918_r	4	-	955	4	1	0.0743843	8.17e-06
chr15	79687198	79687199	Josd1_NM_028792_utr5_3_0_chr15_79686918_r	5	-	955	5	1	0.0743843	8.17e-06
chr6	66535514	66535515	Mad2l1_NM_001355624_utr5_0_0_chr6_66535221_f,Mad2l1_NM_019499_utr5_0_0_chr6_66535221_f	6	+	306	6	1	0	0.00094
chr9	75398420	75398421	Mapk6_NM_015806_utr5_4_0_chr9_75398134_r,Mapk6_NM_027418_utr5_4_0_chr9_75398134_r	7	-	618	11	1	0	0.00265
chr18	35571987	35571988	Matr3_NM_010771_utr5_1_0_chr18_35571843_f	7	+	181	7	1	0	0.00566
chr15	36608795	36608796	Pabpc1_NM_008774_utr5_14_0_chr15_36608507_r	11	-	467	11	1	0.284351	3.53e-06
chr15	36608848	36608849	Pabpc1_NM_008774_utr5_14_0_chr15_36608507_r	6	-	467	6	1	0.284351	3.53e-06
chr12	44282665	44282666	Pnpla8_NM_026164_utr5_1_0_chr12_44282578_f	18	+	89	18	1	0	0.00357
chr9	71483694	71483695	Polr2m_NM_001164793_utr5_2_0_chr9_71483607_r	9	-	199	13	1	0.0878949	6.77e-08
chr15	73751426	73751427	Ptp4a3_NM_001166388_utr5_1_0_chr15_73751129_f,Ptp4a3_NM_001166389_utr5_1_0_chr15_73751129_f,Ptp4a3_NM_008975_utr5_1_0_chr15_73751129_f	11	+	794	11	1	0.0676574	5.67e-07
chr7	122970865	122970866	Rbbp6_NM_011247_utr5_0_0_chr7_122970564_f,Rbbp6_NM_175023_utr5_0_0_chr7_122970564_f	11	+	398	11	1	0	0.00391
chr7	122970894	122970895	Rbbp6_NM_011247_utr5_0_0_chr7_122970564_f,Rbbp6_NM_175023_utr5_0_0_chr7_122970564_f	9	+	398	9	1	0	0.00391
chr16	10170460	10170461	Rpl39l_NM_026594_utr5_1_0_chr16_10170415_f	5	+	77	5	1	0.474285	5.22e-06
chr1	156051845	156051846	Tor1aip2_NM_001160180_utr5_2_0_chr1_156051294_f,Tor1aip2_NM_001160181_utr5_2_0_chr1_156051294_f,Tor1aip2_NM_001160182_utr5_2_0_chr1_156051294_f,Tor1aip2_NM_022329_utr5_1_0_chr1_156051294_f	11	+	584	11	1	0	0.0018
chr3	96558110	96558111	Txnip_NM_001009935_utr5_0_0_chr3_96557957_f,Txnip_NM_023719_utr5_0_0_chr3_96557957_f	7	+	279	7	1	0	0.00786
chr9	31053250	31053251	Zbtb44_NM_001115130_utr5_1_0_chr9_31053240_f,Zbtb44_NM_172765_utr5_1_0_chr9_31053240_f	6	+	56	6	1	0	0.00515

## Sheet: Replicated CDS peaks
Chr	Start	End	Interval	Maximum_Height	Strand	Interval_Length	Tag_Count	Span_Size	RPKM	p-Value
chr10	70169096	70169097	Ccdc6_NM_001111121_cds_4_0_chr10_70169092_f	7	+	161	7	1	0.680496	6.51e-06
chr10	117051247	117051249	Cct2_NM_007636_cds_0_0_chr10_117051246_r	55	-	31	99	2	0.863644	1e-45
chr6	120761888	120761889	Cecr2_NM_001128151_cds_16_0_chr6_120761141_f	6	+	1417	6	1	0.101595	2.62e-05
chr5	30672543	30672544	Cenpa_NM_001302129_cds_2_0_chr5_30672464_f,Cenpa_NM_001302130_cds_3_0_chr5_30672464_f,Cenpa_NM_001302131_cds_3_0_chr5_30672464_f,Cenpa_NM_001302132_cds_1_0_chr5_30672464_f,Cenpa_NM_007681_cds_1_0_chr5_30672464_f	7	+	107	11	1	0.341308	6.43e-05
chr10	80170477	80170478	Cirbp_NM_007705_cds_4_0_chr10_80170425_f	7	+	82	7	1	0.445365	2.36e-05
chr10	80170759	80170761	Cirbp_NM_007705_cds_5_0_chr10_80170694_f	16	+	71	28	2	0.75662	5.1e-13
chr19	25559923	25559924	Dmrt1_NM_015826_cds_3_0_chr19_25559867_f	7	+	145	7	1	0.503723	3.86e-05
chr10	81179173	81179174	Eef2_NM_007907_cds_4_0_chr10_81179081_f	6	+	179	6	1	1.5124	1.53e-05
chr6	128432450	128432451	Fkbp4_NM_010219_cds_1_0_chr6_128432422_r	5	-	240	5	1	0.145759	3.97e-06
chr3	52345282	52345283	Foxo1_NM_019739_cds_1_0_chr3_52345039_f	8	+	1338	10	1	0.162182	5.33e-07
chr10	37000372	37000373	Hdac2_NM_008229_cds_12_0_chr10_37000369_f	6	+	58	9	1	0.629654	7.02e-06
chr13	58127400	58127401	Hnrnpa0_NM_029872_cds_0_0_chr13_58127396_r	7	-	918	7	1	0.143485	1.13e-05
chr11	51605621	51605622	Hnrnpab_NM_001048061_cds_5_0_chr11_51605461_r,Hnrnpab_NM_010448_cds_4_0_chr11_51605461_r	8	-	169	8	1	0.206995	8.4e-06
chr17	45570698	45570699	Hsp90ab1_NM_008302_cds_6_0_chr17_45570666_r	5	-	134	5	1	0.199798	5.36e-06
chr12	86881781	86881782	Irf2bpl_NM_145836_cds_0_0_chr12_86881570_r	14	-	2328	25	1	0.0716072	2.01e-06
chr13	47082903	47082904	Kdm1b_NM_172262_cds_20_0_chr13_47082875_f	11	+	84	11	1	0.639524	1.09e-06
chr18	35587800	35587801	Matr3_NM_010771_cds_12_0_chr18_35587631_f	5	+	223	5	1	0.481794	3.35e-05
chr14	56697132	56697133	Mphosph8_NM_023773_cds_13_0_chr14_56697131_f	9	+	42	9	1	5.16666	1.1e-05
chr11	48805588	48805589	Rack1_NM_008143_cds_6_0_chr11_48805545_f	4	+	111	4	1	0.967928	3.62e-05
chr10	58480586	58480587	Ranbp2_NM_011240_cds_19_0_chr10_58476157_f	17	+	4663	17	1	0.0271842	9.08e-07
chr10	58480617	58480618	Ranbp2_NM_011240_cds_19_0_chr10_58476157_f	5	+	4663	9	1	0.0271842	4.2e-05
chr10	58493867	58493869	Ranbp2_NM_011240_cds_28_0_chr10_58493663_f	9	+	306	13	2	0.294902	2.03e-08
chr14	73282907	73282908	Rb1_NM_009029_cds_20_0_chr14_73282868_r	6	-	111	6	1	0.241198	1.31e-05
chr2	156095382	156095383	Rbm12_NM_029397_cds_0_0_chr2_156095372_r,Rbm12_NM_170598_cds_0_0_chr2_156095372_r	8	-	2979	8	1	0.00587146	3.79e-05
chr6	115807839	115807840	Rpl32_NM_172086_cds_2_0_chr6_115807802_r	6	-	96	6	1	0.546596	2.9e-06
chr15	76905893	76905894	Rpl8_NM_012053_cds_4_0_chr15_76905856_f	10	+	116	10	1	1.40758	7.5e-06
chr2	180258018	180258020	Rps21_NM_001355516_cds_2_0_chr2_180257986_f,Rps21_NM_001355517_cds_3_0_chr2_180257986_f,Rps21_NM_001355518_cds_3_0_chr2_180257986_f,Rps21_NM_001355520_cds_3_0_chr2_180257986_f,Rps21_NM_001355521_cds_3_0_chr2_180257986_f,Rps21_NM_025587_cds_3_0_chr2_180257986_f	15	+	72	21	2	0.507221	6.55e-10
chr7	12925497	12925498	Rps5_NM_009095_cds_2_0_chr7_12925392_f	14	+	210	14	1	0.685524	4.94e-07
chr17	80445632	80445633	Sos1_NM_009231_cds_15_0_chr17_80445602_r	4	-	111	4	1	0.482396	2.38e-05
chr17	23817716	23817717	Srrm2_NM_175229_cds_9_0_chr17_23815122_f	4	+	6569	4	1	0.0964834	4.98e-05
chr17	23821381	23821382	Srrm2_NM_175229_cds_9_0_chr17_23815122_f	12	+	6569	12	1	0.0964834	2.47e-05
chr2	69870788	69870789	Ssb_NM_001110145_cds_10_0_chr2_69870678_f,Ssb_NM_001355265_cds_10_0_chr2_69870681_f,Ssb_NM_009278_cds_10_0_chr2_69870678_f	12	+	156	17	1	1.40444	1.23e-06
chr10	88472926	88472927	Sycp3_NM_011517_cds_8_0_chr10_88472905_f	10	+	54	10	1	18.4215	2.94e-07
chr17	12919421	12919422	Tcp1_NM_001290712_cds_2_0_chr17_12919351_f,Tcp1_NM_013686_cds_3_0_chr17_12919351_f	8	+	98	8	1	0.548163	1.55e-06
chr8	33573030	33573031	Tex15_NM_031374_cds_0_0_chr8_33570544_f	6	+	7035	6	1	0.0180185	1.58e-05
chr11	121147661	121147662	Tex19.1_NM_028602_cds_2_0_chr11_121146818_f	7	+	1056	7	1	0.0508712	8.35e-06
chr7	13030769	13030770	Trim28_NM_011588_cds_16_0_chr7_13030689_f	10	+	174	10	1	0.629654	1.33e-06
chr1	84786140	84786141	Trip12_NM_133975_cds_37_0_chr1_84786091_r	12	-	106	16	1	0.67016	3.27e-07
chrX	140598304	140598305	Tsc22d3_NM_001077364_cds_2_0_chrX_140598128_r	7	-	314	9	1	0.111408	6.95e-06
chr5	125386068	125386069	Ubc_NM_019639_cds_0_0_chr5_125386057_r	10	-	2205	14	1	0.0200744	1.94e-05
chr4	155957293	155957294	Ube2j2_NM_001039157_cds_7_0_chr4_155957081_f,Ube2j2_NM_001039158_cds_6_0_chr4_155957081_f,Ube2j2_NM_001039159_cds_6_0_chr4_155957081_f,Ube2j2_NM_001284312_cds_7_0_chr4_155957081_f,Ube2j2_NM_001284314_cds_5_0_chr4_155957081_f,Ube2j2_NM_021402_cds_7_0_chr4_155957081_f	13	+	285	19	1	0.188491	2.02e-07
chr4	155957297	155957299	Ube2j2_NM_001039157_cds_7_0_chr4_155957081_f,Ube2j2_NM_001039158_cds_6_0_chr4_155957081_f,Ube2j2_NM_001039159_cds_6_0_chr4_155957081_f,Ube2j2_NM_001284312_cds_7_0_chr4_155957081_f,Ube2j2_NM_001284314_cds_5_0_chr4_155957081_f,Ube2j2_NM_021402_cds_7_0_chr4_155957081_f	26	+	285	51	2	0.188491	4.09e-14
chr5	66682512	66682513	Uchl1_NM_011670_cds_4_0_chr5_66682442_f	7	+	86	7	1	3.99721	1.03e-06
chr11	23284722	23284723	Xpo1_NM_001035226_cds_14_0_chr11_23284548_f,Xpo1_NM_134014_cds_14_0_chr11_23284548_f	6	+	182	6	1	0.59033	4.93e-05
chr1	136627958	136627959	Zfp281_NM_001160251_cds_1_0_chr1_136625286_f,Zfp281_NM_177643_cds_1_0_chr1_136625286_f	6	+	2682	6	1	0.0336465	1.17e-05

## Sheet: Replicated ncRNA peaks
Chr	Start	End	Interval	Maximum_Height	Strand	Interval_Length	Tag_Count	Span_Size	RPKM	p-Value
chr11	116674635	116674636	1810032O08Rik_NR_027821_exon_4_0_chr11_116674300_f,1810032O08Rik_NR_027821_exon_4_0_chr11_116674300_f,Snord1a_NR_028570_exon_0_0_chr11_116674597_f	13	+	1499	13	1	0	0.0046
chr2	156389817	156389818	2900097C17Rik_NR_024329_exon_0_0_chr2_156388063_r	6	-	4917	6	1	0.00355727	8.35e-05
chr2	156391481	156391483	2900097C17Rik_NR_024329_exon_0_0_chr2_156388063_r	49	-	4917	55	2	0.00355727	8.01e-11
chr2	156391490	156391491	2900097C17Rik_NR_024329_exon_0_0_chr2_156388063_r	4	-	4917	4	1	0.00355727	0.000138
chr2	156391850	156391851	2900097C17Rik_NR_024329_exon_0_0_chr2_156388063_r	20	-	4917	28	1	0.00355727	0.000124
chr2	156391852	156391853	2900097C17Rik_NR_024329_exon_0_0_chr2_156388063_r	13	-	4917	28	1	0.00355727	1.09e-06
chr10	116962651	116962652	4933412E12Rik_NR_038025_exon_3_0_chr10_116962030_f,4933412E12Rik_NR_038026_exon_2_0_chr10_116962030_f	5	+	1250	5	1	0	0.000407
chr6	89109854	89109855	4933427D06Rik_NR_134977_exon_4_0_chr6_89107668_f,4933427D06Rik_NR_134978_exon_3_0_chr6_89107668_f,4933427D06Rik_NR_134979_exon_2_0_chr6_89107668_f	8	+	2372	12	1	0.0226476	2.61e-05
chr6	89110007	89110008	4933427D06Rik_NR_134977_exon_4_0_chr6_89107668_f,4933427D06Rik_NR_134978_exon_3_0_chr6_89107668_f,4933427D06Rik_NR_134979_exon_2_0_chr6_89107668_f	7	+	2372	7	1	0.0226476	0.000138
chr6	89110009	89110010	4933427D06Rik_NR_134977_exon_4_0_chr6_89107668_f,4933427D06Rik_NR_134978_exon_3_0_chr6_89107668_f,4933427D06Rik_NR_134979_exon_2_0_chr6_89107668_f	5	+	2372	10	1	0.0226476	0.000138
chrX	144373973	144373974	Alg13_NR_037145_exon_26_0_chrX_144373548_f	5	+	901	5	1	0	0.00297
chr10	12922603	12922604	B230208H11Rik_NR_038027_exon_3_0_chr10_12922574_r,B230208H11Rik_NR_038028_exon_2_0_chr10_12922574_r	7	-	554	7	1	0	0.00881
chr10	12922616	12922618	B230208H11Rik_NR_038027_exon_3_0_chr10_12922574_r,B230208H11Rik_NR_038028_exon_2_0_chr10_12922574_r	38	-	554	65	2	0	0.000703
chr5	104551688	104551689	D930016D06Rik_NR_030673_exon_3_0_chr5_104550886_f	5	+	3326	5	1	0	0.000905
chr5	52150308	52150310	Dhx15_NR_104311_exon_0_0_chr5_52150203_r	16	-	576	20	2	0.0464808	1.6e-05
chr5	52150314	52150315	Dhx15_NR_104311_exon_0_0_chr5_52150203_r	13	-	576	13	1	0.0464808	1.08e-05
chr5	52150378	52150379	Dhx15_NR_104311_exon_0_0_chr5_52150203_r	8	-	576	8	1	0.0464808	6.69e-05
chr5	52150418	52150419	Dhx15_NR_104311_exon_0_0_chr5_52150203_r	12	-	576	12	1	0.0464808	0.000103
chr5	52150430	52150431	Dhx15_NR_104311_exon_0_0_chr5_52150203_r	15	-	576	25	1	0.0464808	6.14e-05
chr5	52150432	52150433	Dhx15_NR_104311_exon_0_0_chr5_52150203_r	15	-	576	25	1	0.0464808	3.37e-05
chr5	52150439	52150441	Dhx15_NR_104311_exon_0_0_chr5_52150203_r	8	-	576	12	2	0.0464808	1.23e-05
chr5	52150511	52150512	Dhx15_NR_104311_exon_0_0_chr5_52150203_r	6	-	576	6	1	0.0464808	5.74e-05
chr5	52150534	52150536	Dhx15_NR_104311_exon_0_0_chr5_52150203_r	14	-	576	24	2	0.0464808	3.25e-06
chr5	52150599	52150600	Dhx15_NR_104311_exon_0_0_chr5_52150203_r	16	-	576	22	1	0.0464808	1.82e-06
chr1	161035861	161035862	Gas5_NR_002840_exon_0_0_chr1_161035166_f	4	+	2382	4	1	0.152426	0.000133
chr13	12182956	12182957	Gm10336_NR_045170_exon_0_0_chr13_12182717_r	7	-	3772	7	1	0.00463708	0.000155
chr11	62553171	62553173	Gm1821_NR_002875_exon_2_0_chr11_62552878_f	25	+	329	34	2	0.548571	5.77e-07
chr14	46084943	46084945	Gm1821_NR_002875_exon_1_0_chr14_46084736_f	48	+	222	70	2	0	0.00107
chr14	46084949	46084950	Gm1821_NR_002875_exon_1_0_chr14_46084736_f	15	+	222	15	1	0	0.00978
chr5	149154146	149154147	Gm8615_NR_028061_exon_0_0_chr5_149154128_r	10	-	2065	10	1	0	0.000218
chr6	113070752	113070753	Gt(ROSA)26Sor_NR_027008_exon_0_0_chr6_113070399_r,Gt(ROSA)26Sor_NR_027009_exon_0_0_chr6_113070399_r	6	-	1037	10	1	0.033734	6.54e-05
chr6	113071061	113071062	Gt(ROSA)26Sor_NR_027008_exon_0_0_chr6_113070399_r,Gt(ROSA)26Sor_NR_027009_exon_0_0_chr6_113070399_r	4	-	1037	4	1	0.033734	0.000124
chr6	113071145	113071146	Gt(ROSA)26Sor_NR_027008_exon_0_0_chr6_113070399_r,Gt(ROSA)26Sor_NR_027009_exon_0_0_chr6_113070399_r	4	-	1037	4	1	0.033734	0.000124
chr19	5796241	5796242	Malat1_NR_002847_exon_0_0_chr19_5795690_r	7	-	6983	10	1	0.0594007	1.87e-05
chr19	5796292	5796294	Malat1_NR_002847_exon_0_0_chr19_5795690_r	5	-	6983	9	2	0.0594007	0.000119
chr19	5796955	5796956	Malat1_NR_002847_exon_0_0_chr19_5795690_r	5	-	6983	5	1	0.0594007	9.5e-05
chr19	5797649	5797650	Malat1_NR_002847_exon_0_0_chr19_5795690_r	6	-	6983	6	1	0.0594007	6.23e-05
chr19	5797754	5797755	Malat1_NR_002847_exon_0_0_chr19_5795690_r	12	-	6983	12	1	0.0594007	6.34e-05
chr19	5797756	5797757	Malat1_NR_002847_exon_0_0_chr19_5795690_r	5	-	6983	5	1	0.0594007	0.000103
chr19	5797825	5797826	Malat1_NR_002847_exon_0_0_chr19_5795690_r	4	-	6983	4	1	0.0594007	0.000119
chr19	5798469	5798470	Malat1_NR_002847_exon_0_0_chr19_5795690_r	5	-	6983	5	1	0.0594007	0.000103
chr19	5798485	5798486	Malat1_NR_002847_exon_0_0_chr19_5795690_r	10	-	6983	10	1	0.0594007	3.38e-05
chr19	5799117	5799118	Malat1_NR_002847_exon_0_0_chr19_5795690_r	7	-	6983	7	1	0.0594007	3.04e-05
chr19	5800008	5800009	Malat1_NR_002847_exon_0_0_chr19_5795690_r	8	-	6983	8	1	0.0594007	6.34e-05
chr19	5800925	5800926	Malat1_NR_002847_exon_0_0_chr19_5795690_r	6	-	6983	6	1	0.0594007	9.5e-05
chr3	51388442	51388443	Mgarp_NR_028121_exon_0_0_chr3_51388413_r	4	-	911	4	1	0.0191999	0.000128
chr5	108107030	108107031	Mtf2_NR_045608_exon_16_0_chr5_108106588_f	6	+	2632	15	1	0.0204103	0.000137
chr5	108107223	108107224	Mtf2_NR_045608_exon_16_0_chr5_108106588_f	6	+	2632	6	1	0.0204103	0.000352
chr5	108107405	108107406	Mtf2_NR_045608_exon_16_0_chr5_108106588_f	6	+	2632	6	1	0.0204103	0.000137
chr5	108107930	108107931	Mtf2_NR_045608_exon_16_0_chr5_108106588_f	7	+	2632	10	1	0.0204103	0.000131
chr5	108108233	108108234	Mtf2_NR_045608_exon_16_0_chr5_108106588_f	6	+	2632	6	1	0.0204103	0.000352
chr6	85077042	85077043	Npm3-ps1_NR_002702_exon_0_0_chr6_85076141_f	8	+	986	8	1	0	0.000345
chr16	20663281	20663282	Psmd2_NR_027485_exon_20_0_chr16_20663063_f	9	+	352	25	1	0.10375	9.86e-05
chr16	20663283	20663284	Psmd2_NR_027485_exon_20_0_chr16_20663063_f	11	+	352	25	1	0.10375	3.4e-06
chr16	20663380	20663381	Psmd2_NR_027485_exon_20_0_chr16_20663063_f	7	+	352	7	1	0.10375	0.00014
chr16	20663386	20663388	Psmd2_NR_027485_exon_20_0_chr16_20663063_f	12	+	352	41	2	0.10375	9.65e-05
chr16	20663389	20663392	Psmd2_NR_027485_exon_20_0_chr16_20663063_f	13	+	352	41	3	0.10375	5.42e-05
chr6	148355531	148355535	Rps4l_NR_003634_exon_0_0_chr6_148354656_f	30	+	941	54	4	0.883612	3.74e-10
chr6	148355538	148355540	Rps4l_NR_003634_exon_0_0_chr6_148354656_f	27	+	941	38	2	0.883612	5.95e-09
chr6	148355541	148355544	Rps4l_NR_003634_exon_0_0_chr6_148354656_f	27	+	941	53	3	0.883612	2.05e-06
chr6	148355549	148355550	Rps4l_NR_003634_exon_0_0_chr6_148354656_f	9	+	941	13	1	0.883612	1.94e-07
chr6	148355556	148355558	Rps4l_NR_003634_exon_0_0_chr6_148354656_f	25	+	941	61	2	0.883612	3.59e-05
chr6	148355559	148355561	Rps4l_NR_003634_exon_0_0_chr6_148354656_f	25	+	941	61	2	0.883612	3.59e-05
chr6	148355571	148355572	Rps4l_NR_003634_exon_0_0_chr6_148354656_f	9	+	941	14	1	0.883612	1.58e-07
chr2	78920146	78920147	Ube2e3_NR_151457_exon_5_0_chr2_78919958_f,Ube2e3_NR_151458_exon_5_0_chr2_78919958_f	8	+	252	8	1	0.71619	3.44e-06

## Sheet: Replcated retrogene peaks
Chr	Start	End	Interval	Maximum_Height	Strand	Interval_Length	Tag_Count	Span_Size	RPKM	p-Value
chr10	73203262	73203263	AF073993.1-18_exon_10_0_chr10_73203040_f	8	+	228	8	1	0.631403	1e-45
chr14	48079144	48079145	AK002795.1-5_exon_0_0_chr14_48079135_r	5	-	678	9	1	0	0.000592
chr2	157902519	157902520	AK012282.1-4_exon_0_0_chr2_157901452_f	6	+	1070	6	1	0	0.0012
chr4	43664392	43664393	AK012395.1-12_exon_0_0_chr4_43663932_f	8	+	482	8	1	0.111452	4.58e-07
chr9	37486631	37486632	AK017852.1-25_exon_5_0_chr9_37486542_f	14	+	102	14	1	0	0.00328
chr9	71909761	71909764	AK082848.1-17_exon_7_0_chr9_71909745_f	26	+	36	51	3	3.52111	1e-45
chr9	71909775	71909776	AK082848.1-17_exon_7_0_chr9_71909745_f	6	+	36	6	1	3.52111	1e-45
chr11	98624392	98624393	AK134177.1-2_exon_0_0_chr11_98624371_r	21	-	61	21	1	0	0.00599
chr3	104752405	104752407	AK159807.1-72_exon_0_0_chr3_104752380_r	15	-	190	20	2	0	0.00634
chr2	153827057	153827059	BC002087.1-11_exon_0_0_chr2_153826065_f	19	+	1009	19	2	0	0.000275
chr7	140892196	140892197	BC057876.1-33_exon_0_0_chr7_140890800_f	14	+	1400	26	1	0	0.000397
chr15	81972863	81972864	BC062874.1-12_exon_0_0_chr15_81972374_f	19	+	521	27	1	0	0.00411
chr15	81972868	81972869	BC062874.1-12_exon_0_0_chr15_81972374_f	11	+	521	18	1	0	0.00104
chr12	64787635	64787636	NM_001127367.1-6_exon_2_0_chr12_64786659_f	13	+	993	13	1	0	0.000276
chr1	60705680	60705681	NM_001159375.1-1_exon_4_0_chr1_60705407_f	6	+	292	6	1	0	0.00137
chr17	37712162	37712163	NM_001285992.1-2_exon_0_0_chr17_37712141_r	10	-	662	10	1	0	0.000432
chr1	156526646	156526647	NM_007788.3-1_exon_3_0_chr1_156525890_f	18	+	775	18	1	0	0.000347
chr17	6121109	6121118	NM_007991.3-16_exon_0_0_chr17_6121094_r	34	-	960	124	9	0.617629	1e-45
chr8	72035929	72035930	NM_008210.4-154_exon_0_0_chr8_72035164_f	7	+	798	7	1	0	0.00124
chr13	117357921	117357922	NM_008210.4-56_exon_0_0_chr13_117357905_r	8	-	274	13	1	0	0.00108
chr2	166500105	166500106	NM_008907.1-112_exon_0_0_chr2_166500073_r	23	-	441	23	1	0	0.000577
chr14	8799390	8799391	NM_008972.2-21_exon_1_0_chr14_8799391_r	17	-	41	17	1	0	0.00781
chr11	96249205	96249207	NM_009077.2-6_exon_3_0_chr11_96248873_f	32	+	356	55	2	0	0.000737
chr15	76526458	76526459	NM_009082.2-73_exon_0_0_chr15_76526450_r	8	-	154	8	1	0	0.00258
chr2	40557419	40557421	NM_010106.2-47_exon_4_0_chr2_40557316_f	17	+	116	25	2	0	0.00217
chr11	77296378	77296379	NM_010480.5-16_exon_2_0_chr11_77295078_f	8	+	1325	8	1	0	0.000264
chr18	6333054	6333055	NM_011289.3-27_exon_0_0_chr18_6332591_f	8	+	494	8	1	0	0.0034
chr3	92691162	92691164	NM_011740.3-19_exon_4_0_chr3_92690989_f	16	+	188	27	2	0	0.00106
chr3	57717776	57717779	NM_013725.4-19_exon_0_0_chr3_57717766_r	28	-	551	42	3	0	0.000504
chr12	119264245	119264246	NM_019744.4-3_exon_0_0_chr12_119260933_f	5	+	3343	5	1	0	0.000157
chr3	87968654	87968655	NM_020600.4-19_exon_3_0_chr3_87968644_f	19	+	37	19	1	0	0.00979
chr5	26076132	26076133	NM_021511.2-7_exon_9_0_chr5_26076105_f	25	+	58	25	1	0	0.00889
chr6	66875294	66875295	NM_022891.3-145_exon_0_0_chr6_66875272_r	5	-	499	5	1	0	0.001
chr11	85218550	85218551	NM_023423.3-4_exon_6_0_chr11_85217735_f	13	+	832	13	1	0.630096	1e-45
chr15	31278014	31278015	NM_025591.2-3_exon_6_0_chr15_31277855_f	5	+	188	9	1	0	0.00246
chr18	6028497	6028498	NM_025939.2-9_exon_0_0_chr18_6028477_r	5	-	68	5	1	0	0.00595
chr3	95622730	95622732	NM_025963.3-24_exon_0_0_chr3_95622242_f	43	+	570	80	2	0	0.000351
chr17	47411754	47411756	NM_026242.3-2_exon_2_0_chr17_47410868_f	17	+	917	32	2	0.0398254	9.17e-10
chr17	47411766	47411767	NM_026242.3-2_exon_2_0_chr17_47410868_f	25	+	917	25	1	0.0398254	7.2e-07
chr9	114982406	114982409	NM_027015.4-77_exon_0_0_chr9_114982395_r	24	-	345	38	3	0.0776028	3.67e-11
chrX	103525048	103525049	NM_027654.2-5_exon_42_0_chrX_103525029_r	23	-	28	23	1	0	0.00903
chr10	90130441	90130442	NM_028127.3-1_exon_0_0_chr10_90130419_r	6	-	100	6	1	0.174911	1.16e-07
chr14	122119377	122119378	NM_053263.1-41_exon_2_0_chr14_122119052_f	4	+	341	4	1	0	0.00118
chr7	72674853	72674855	NM_133714.5-4_exon_1_0_chr7_72674466_f	16	+	428	27	2	0	0.0018
chr7	72674867	72674868	NM_133714.5-4_exon_1_0_chr7_72674466_f	9	+	428	9	1	0	0.00484
chrX	46455864	46455865	NM_172086.2-69_exon_0_0_chrX_46455842_r	16	-	504	27	1	0	0.000689
chr1	55128769	55128770	NM_175229.3-1_exon_7_0_chr1_55128708_f	9	+	93	9	1	0	0.00752
chr1	192073766	192073767	NM_181796.2-1_exon_0_0_chr1_192073757_r	6	-	752	6	1	0	0.000509
chr5	76231921	76231922	Y09873.1-26_exon_0_0_chr5_76231913_r	21	-	112	21	1	0	0.00954

## Sheet: 3S undiff gonia TPMs
gene.id	transcript.id	MM257.1a.transcript.TPM	MM257.1b.transcript.TPM	mean.transcript.TPM	MM257.1a.gene.TPM	MM257.1b.gene.TPM	mean.gene.TPM
0610009B22Rik	NM_025319	19.1456	24.7544	21.95	19.1456	24.7544	21.95
0610009E02Rik (ncRNA)	NR_152207	0	0	0	2.17962	1.73398	1.9568
0610009E02Rik (ncRNA)	NR_152208	2.17962	1.73398	1.9568	2.17962	1.73398	1.9568
0610009E02Rik (ncRNA)	NR_152209	0	0	0	2.17962	1.73398	1.9568
0610009L18Rik (ncRNA)	NR_038126	10.2056	11.3614	10.7835	10.2056	11.3614	10.7835
0610010B08Rik	NM_001177543	13.8611	40.933	27.3971	13.8611	40.933	27.3971
0610010B08Rik	NM_001177543	13.8611	40.933	27.3971	13.8611	40.933	27.3971
0610010B08Rik	NM_001177543	13.8611	40.933	27.3971	13.8611	40.933	27.3971
0610010B08Rik	NM_001177543	13.8611	40.933	27.3971	13.8611	40.933	27.3971
0610010B08Rik	NM_001177543	13.8611	40.933	27.3971	13.8611	40.933	27.3971
0610010B08Rik	NM_001177543	13.8611	40.933	27.3971	13.8611	40.933	27.3971
0610010F05Rik	NM_001347242	4.30478e-08	0.000326739	0.000163391	10.0271	11.0944	10.5607
0610010F05Rik	NM_027860	10.0271	11.0941	10.5606	10.0271	11.0944	10.5607
0610010F05Rik (ncRNA)	NR_156450	8.84662	8.77377	8.81019	8.84662	8.77377	8.81019
0610010K14Rik	NM_001177601	34.9625	25.834	30.3983	230.916	213.403	222.16
0610010K14Rik	NM_001177603	102.86	96.5112	99.6854	230.916	213.403	222.16
0610010K14Rik	NM_001177606	0.120157	13.2827	6.70144	230.916	213.403	222.16
0610010K14Rik	NM_001177607	28.4886	12.2279	20.3583	230.916	213.403	222.16
0610010K14Rik	NM_026757	0.217189	9.89286	5.05502	230.916	213.403	222.16
0610010K14Rik	NM_145758	64.268	55.6546	59.9613	230.916	213.403	222.16
0610012G03Rik (ncRNA)	NR_027897	28.2667	41.4633	34.865	28.2667	41.4633	34.865
0610030E20Rik	NM_026696	11.4533	14.0051	12.7292	11.4533	14.0051	12.7292
0610037L13Rik	NM_001347160	0	0	0	25.4349	28.9635	27.1992
0610037L13Rik	NM_028754	25.4349	28.9635	27.1992	25.4349	28.9635	27.1992
0610038B21Rik (ncRNA)	NR_028125	5.82249	7.81213	6.81731	5.82249	7.81213	6.81731
0610039H22Rik (ncRNA)	NR_131025	5.3667	5.37295	5.36983	5.3667	5.37295	5.36983
0610039K10Rik (ncRNA)	NR_028113	4.52893	2.87211	3.70052	4.52893	2.87211	3.70052
0610040B10Rik (ncRNA)	NR_027874	0	15.935	7.96748	0	15.935	7.96748
0610043K17Rik (ncRNA)	NR_040640	2.04796	3.25707	2.65252	2.04796	3.25707	2.65252
1110002L01Rik (ncRNA)	NR_030694	6.41298	8.42559	7.41928	6.41298	8.42559	7.41928
1110004F10Rik	NM_019772	100.769	89.7994	95.2844	100.769	89.7994	95.2844
1110006O24Rik (ncRNA)	NR_027810	8.33467	4.30927	6.32197	8.33467	4.30927	6.32197
1110008L16Rik	NM_025373	32.2139	34.2407	33.2273	32.2139	34.2407	33.2273
1110008P14Rik	NM_198001	100.233	117.356	108.795	100.233	117.356	108.795
1110012L19Rik	NM_026787	35.0843	31.4658	33.2751	35.0843	31.4658	33.2751
1110019D14Rik (ncRNA)	NR_045995	2.5191	5.57127	4.04519	2.5191	5.57127	4.04519
1110020A21Rik (ncRNA)	NR_027929	0	0	0	6.71239	1.70928	4.21084
1110020A21Rik (ncRNA)	NR_027930	6.71239	1.70928	4.21084	6.71239	1.70928	4.21084
1110032A03Rik	NM_001311073	0	7.09624e-09	3.54812e-09	8.41105	9.02813	8.71959
1110032A03Rik	NM_001361107	0	0	0	8.41105	9.02813	8.71959
1110032A03Rik	NM_001361108	1.16684	0	0.58342	8.41105	9.02813	8.71959
1110032A03Rik	NM_023483	7.24421	9.02813	8.13617	8.41105	9.02813	8.71959
1110032F04Rik	NM_001167996	0.818774	1.33767	1.07822	0.818774	1.33767	1.07822
1110038B12Rik (ncRNA)	NR_015536	26.4734	65.2496	45.8615	103.28	124.276	113.778
1110038B12Rik (ncRNA)	NR_027943	76.8061	59.0267	67.9164	103.28	124.276	113.778
1110038F14Rik	NM_001347540	40.6896	33.5151	37.1023	40.6896	33.5151	37.1023
1110038F14Rik	NM_054099	0	0	0	40.6896	33.5151	37.1023
1110046J04Rik (ncRNA)	NR_040707	4.22198	7.099	5.66049	4.22198	7.099	5.66049
1110051M20Rik	NM_001311144	3.62345	3.87494	3.7492	26.2142	22.7822	24.4982
1110051M20Rik	NM_175123	22.5907	18.9072	20.749	26.2142	22.7822	24.4982
1110058D11Rik (ncRNA)	NR_130982	4.97857	2.68623	3.8324	4.97857	2.68623	3.8324
1110059E24Rik	NM_025423	65.6135	66.3636	65.9885	65.6135	66.3636	65.9885
1110059G10Rik	NM_025419	6.3298	5.76602	6.04791	6.3298	5.76602	6.04791
1110065P20Rik	NM_001142727	20.952	13.9596	17.4558	51.1913	48.416	49.8036
1110065P20Rik	NM_001347196	30.2393	34.4563	32.3478	51.1913	48.416	49.8036
1190002N15Rik	NM_001033145	29.2175	33.1701	31.1938	29.2175	33.1701	31.1938
1190007I07Rik	NM_001135567	28.2456	26.5209	27.3833	28.2456	26.5209	27.3833
1190007I07Rik	NM_001135568	0	0	0	28.2456	26.5209	27.3833
1190007I07Rik	NM_001135569	0	0	0	28.2456	26.5209	27.3833
1190028D05Rik (ncRNA)	NR_151738	8.27287	7.46263	7.86775	8.27287	7.46263	7.86775
1300002E11Rik (ncRNA)	NR_037957	8.75971	11.3914	10.0756	25.2839	34.1791	29.7315
1300002E11Rik (ncRNA)	NR_037958	16.5242	22.7877	19.6559	25.2839	34.1791	29.7315
1300017J02Rik	NM_027918	2.79742	1.57731	2.18736	2.79742	1.57731	2.18736
1500004A13Rik (ncRNA)	NR_015498	12.3159	11.2648	11.7903	12.3159	11.2648	11.7903
1500009L16Rik	NM_001145198	21.6694	16.7666	19.218	21.6694	16.7666	19.218
1500011B03Rik (ncRNA)	NR_027817	18.2566	13.6021	15.9294	35.0135	31.0122	33.0128
1500011B03Rik (ncRNA)	NR_027818	16.7569	17.41	17.0835	35.0135	31.0122	33.0128
1500011K16Rik (ncRNA)	NR_015476	5.67175	8.71131	7.19153	5.67175	8.71131	7.19153
1500012K07Rik (ncRNA)	NR_045812	8.175	21.0222	14.5986	8.70201	21.0222	14.8621
1500012K07Rik (ncRNA)	NR_045814	0.527	0	0.2635	8.70201	21.0222	14.8621
1500015A07Rik (ncRNA)	NR_029432	17.3486	18.5256	17.9371	17.3486	18.5256	17.9371
1500015L24Rik (ncRNA)	NR_045817	1.89958	1.04678	1.47318	1.89958	1.04678	1.47318
1500026H17Rik (ncRNA)	NR_130956	3.01868	2.58892	2.8038	3.01868	2.58892	2.8038
1600002K03Rik	NM_027207	12.3776	11.8765	12.127	12.3776	11.8765	12.127
1600010M07Rik (ncRNA)	NR_037959	1.82926	1.63961	1.73444	1.82926	1.63961	1.73444
1600012H06Rik	NM_001083880	0	0.0693296	0.0346648	19.6125	21.0428	20.3277
1600012H06Rik	NM_001083881	0	7.56426	3.78213	19.6125	21.0428	20.3277
1600012H06Rik	NM_001083882	19.6125	13.4033	16.5079	19.6125	21.0428	20.3277
1600012H06Rik	NM_026451	0	0.00594192	0.00297096	19.6125	21.0428	20.3277
1600014C10Rik	NM_001085385	1.01201	1.71322	1.36261	1.96315	3.07821	2.52068
1600014C10Rik	NM_028166	0.951144	1.36499	1.15807	1.96315	3.07821	2.52068
1600020E01Rik (ncRNA)	NR_037960	47.6122	32.1668	39.8895	55.6921	46.1731	50.9326
1600020E01Rik (ncRNA)	NR_037961	8.07988	14.0064	11.0431	55.6921	46.1731	50.9326
1600023N17Rik (ncRNA)	NR_073433	4.15737	2.68553	3.42145	4.15737	2.68553	3.42145
1600025M17Rik (ncRNA)	NR_038168	0	2.14243	1.07122	0	2.14243	1.07122
1600029I14Rik (ncRNA)	NR_028123	0.534636	2.65968	1.59716	0.534636	2.65968	1.59716
1600029O15Rik (ncRNA)	NR_033522	1.71656	2.30717	2.01186	1.71656	2.30717	2.01186
1700001C19Rik	NM_001172091	0	6.38542e-08	3.19271e-08	6.26361	9.04678	7.6552
1700001C19Rik	NM_001347584	0	0	0	6.26361	9.04678	7.6552
1700001C19Rik	NM_029296	6.26361	9.04678	7.6552	6.26361	9.04678	7.6552
1700001J03Rik	NM_001008547	1.97869	1.09697	1.53783	1.97869	1.09697	1.53783
1700001L05Rik (ncRNA)	NR_027980	20.2232	18.9298	19.5765	20.2232	18.9298	19.5765
1700001L19Rik	NM_027035	1.8962	2.20539	2.0508	1.8962	2.20539	2.0508
1700003E16Rik	NM_027948	1.38972	2.22689	1.8083	1.38972	2.22689	1.8083
1700003G18Rik (ncRNA)	NR_029433	5.08578	1.61761	3.35169	5.08578	1.61761	3.35169
1700003M07Rik (ncRNA)	NR_040647	2.49633	1.9624	2.22936	9.64081	10.4076	10.0242
1700003M07Rik (ncRNA)	NR_040648	7.14449	8.4452	7.79484	9.64081	10.4076	10.0242
1700006H21Rik (ncRNA)	NR_045900	0	3.21364	1.60682	0	3.21364	1.60682
1700007J10Rik (ncRNA)	NR_045476	42.4686	65.4584	53.9635	42.4686	65.4584	53.9635
1700007K13Rik	NM_027040	2.67986	2.18741	2.43364	2.67986	2.18741	2.43364
1700007L15Rik (ncRNA)	NR_045709	6.79629	4.61388	5.70508	6.79629	4.61388	5.70508
1700007P06Rik (ncRNA)	NR_040554	2.14965	0.842868	1.49626	2.14965	0.842868	1.49626
1700008C04Rik (ncRNA)	NR_126468	2.12453	5.13121	3.62787	2.12453	5.13121	3.62787
1700008J07Rik (ncRNA)	NR_024331	12.738	11.0206	11.8793	12.738	11.0206	11.8793
1700008O03Rik	NM_027049	0.931823	6.40477	3.6683	0.931823	6.40477	3.6683
1700010D01Rik	NM_029590	1.66747	1.5286	1.59804	1.66747	1.5286	1.59804
1700010I02Rik (ncRNA)	NR_040587	0	6.26888	3.13444	0	6.26888	3.13444
1700010I14Rik	NM_001347544	1.40814	0.993061	1.2006	1.40814	0.993061	1.2006
1700010I14Rik	NM_025851	0	0	0	1.40814	0.993061	1.2006
1700010N08Rik (ncRNA)	NR_153826	13.9181	23.3511	18.6346	13.9181	23.3511	18.6346
1700011B04Rik (ncRNA)	NR_045616	0.854134	2.95735	1.90574	0.854134	2.95735	1.90574
1700011M02Rik (ncRNA)	NR_073044	9.14992	0	4.57496	9.14992	0	4.57496
1700012B07Rik	NM_001162428	0.844779	0.754125	0.799452	10.3171	12.0883	11.2027
1700012B07Rik	NM_027038	9.47229	11.3342	10.4032	10.3171	12.0883	11.2027
1700012C14Rik (ncRNA)	NR_131049	6.85722	2.73891	4.79807	6.85722	2.73891	4.79807
1700012D01Rik (ncRNA)	NR_045171	42.6997	43.9399	43.3198	42.6997	43.9399	43.3198
1700012D14Rik (ncRNA)	NR_015573	3.95011	1.57019	2.76015	3.95011	1.57019	2.76015
1700012D16Rik (ncRNA)	NR_126464	2.27721	1.81221	2.04471	2.27721	1.81221	2.04471
1700013F07Rik	NM_029314	4.48745	5.35609	4.92177	4.48745	5.35609	4.92177
1700013H16Rik	NM_001200013	25.5455	33.7512	29.6484	25.5455	33.7512	29.6484
1700015F17Rik	NM_001200025	2.40511	0	1.20255	2.40511	0	1.20255
1700016A09Rik (ncRNA)	NR_151732	5.9095	5.53483	5.72216	5.9095	5.53483	5.72216
1700016D06Rik	NM_024271	5.32731	10.002	7.66464	5.32731	10.002	7.66464
1700016K19Rik	NM_198637	19.9678	25.492	22.7299	19.9678	25.492	22.7299
1700016L04Rik (ncRNA)	NR_045824	2.82271	5.41511	4.11891	2.82271	5.41511	4.11891
1700017B05Rik	NM_028820	16.5195	17.1874	16.8535	16.5195	17.1874	16.8535
1700018B08Rik	NM_001357259	0.00125078	0.000308569	0.000779675	1.3318	1.56959	1.45069
1700018B08Rik	NM_001357260	1.31866	1.56793	1.4433	1.3318	1.56959	1.45069
1700018B08Rik	NM_029597	0.0118902	0.00134521	0.0066177	1.3318	1.56959	1.45069
1700018B24Rik (ncRNA)	NR_003617	9.81172	10.98	10.3959	9.81172	10.98	10.3959
1700018G05Rik (ncRNA)	NR_045422	3.70775	0	1.85387	3.70775	0	1.85387
1700019A02Rik	NM_027070	8.94568	4.74144	6.84356	8.94568	4.74144	6.84356
1700019C18Rik (ncRNA)	NR_126478	37.2378	10.9345	24.0861	37.2378	10.9345	24.0861
1700019E08Rik (ncRNA)	NR_040497	7.16716	6.16033	6.66375	7.16716	6.16033	6.66375
1700020A23Rik	NM_001163483	0	3.18701	1.5935	1.34426	3.18701	2.26563
1700020A23Rik	NM_029375	1.34426	0	0.67213	1.34426	3.18701	2.26563
1700020D05Rik	NM_023781	0	2.4584	1.2292	0	2.4584	1.2292
1700020I14Rik (ncRNA)	NR_015473	41.2553	61.8236	51.5395	72.0823	81.6391	76.8607
1700020I14Rik (ncRNA)	NR_027832	30.8271	19.8155	25.3213	72.0823	81.6391	76.8607
1700020N01Rik (ncRNA)	NR_027968	13.7379	11.2093	12.4736	13.7379	11.2093	12.4736
1700021F05Rik	NM_026411	68.0702	70.8731	69.4716	68.0702	70.8731	69.4716
1700021F07Rik	NM_028158	6.45559	5.09411	5.77485	6.45559	5.09411	5.77485
1700022H01Rik (ncRNA)	NR_126477	0.758584	1.27372	1.01615	0.758584	1.27372	1.01615
1700023C21Rik (ncRNA)	NR_045909	0	7.08481	3.54241	0	7.08481	3.54241
1700023D09Rik (ncRNA)	NR_132423	2.75528	8.59705	5.67617	2.75528	8.59705	5.67617
1700023D09Rik (ncRNA)	NR_132424	0	0	0	2.75528	8.59705	5.67617
1700024F13Rik (ncRNA)	NR_045363	13.6458	10.4065	12.0261	13.6458	10.4065	12.0261
1700024G13Rik	NM_001034037	3.84356	6.22271	5.03314	3.84356	6.22271	5.03314
1700025F24Rik (ncRNA)	NR_040578	3.48443	3.2996	3.39202	3.48443	3.2996	3.39202
1700025G04Rik	NM_197990	4.47046	3.98692	4.22869	4.47046	3.98692	4.22869
1700025N23Rik (ncRNA)	NR_040523	4.66759	4.81163	4.73961	4.66759	4.81163	4.73961
1700026D11Rik (ncRNA)	NR_028286	1.31445	2.41084	1.86265	1.31445	2.41084	1.86265
1700028D13Rik (ncRNA)	NR_045377	5.97835	12.7171	9.34773	5.97835	12.7171	9.34773
1700028D13Rik (ncRNA)	NR_045378	0	0	0	5.97835	12.7171	9.34773
1700028E10Rik (ncRNA)	NR_045699	7.17467	10.8132	8.99393	15.2966	17.8471	16.5718
1700028E10Rik (ncRNA)	NR_045700	8.12191	7.03389	7.5779	15.2966	17.8471	16.5718
1700028I16Rik (ncRNA)	NR_038042	6.89707	6.27176	6.58442	6.89707	6.27176	6.58442
1700028J19Rik (ncRNA)	NR_029436	0.914517	1.5169	1.21571	0.914517	1.5169	1.21571
1700028K03Rik	NM_175241	4.44161	4.81452	4.62807	11.8721	12.1359	12.004
1700028K03Rik	NM_182745	7.43051	7.32136	7.37593	11.8721	12.1359	12.004
1700029H14Rik	NM_001080781	1.36916	0	0.684579	1.36916	0.780964	1.07506
1700029H14Rik	NM_025601	0	0.780964	0.390482	1.36916	0.780964	1.07506
1700029J03Rik (ncRNA)	NR_040494	1.92243	1.03377	1.4781	1.92243	1.03377	1.4781
1700029J07Rik	NM_001033148	7.25197	5.67899	6.46548	13.1205	25.9991	19.5598
1700029J07Rik	NM_001359113	5.86856	20.3201	13.0943	13.1205	25.9991	19.5598
1700029M20Rik (ncRNA)	NR_015613	2.65221	0	1.32611	3.78998	3.60096	3.69547
1700029M20Rik (ncRNA)	NR_027909	1.13776	3.60096	2.36936	3.78998	3.60096	3.69547
1700029P11Rik	NM_025503	12.3771	10.9807	11.6789	12.3771	10.9807	11.6789
1700030C10Rik (ncRNA)	NR_015521	13.6057	13.3631	13.4844	13.6057	13.3631	13.4844
1700030F04Rik (ncRNA)	NR_045731	6.93107	0	3.46553	6.93107	0	3.46553
1700030J22Rik	NM_001357253	5.40595	0	2.70297	12.0396	11.2925	11.6661
1700030J22Rik	NM_001357254	0	11.2925	5.64626	12.0396	11.2925	11.6661
1700030J22Rik	NM_001357255	8.79352e-06	0	4.39676e-06	12.0396	11.2925	11.6661
1700030J22Rik	NM_027103	6.63365	0	3.31683	12.0396	11.2925	11.6661
1700030K09Rik	NM_028170	7.41371	9.54969	8.4817	7.41371	9.54969	8.4817
1700030L20Rik (ncRNA)	NR_040592	4.52492	3.01713	3.77102	4.52492	3.01713	3.77102
1700030N03Rik (ncRNA)	NR_045304	0	6.54506	3.27253	0	6.54506	3.27253
1700034H15Rik (ncRNA)	NR_030669	5.7299	8.04754	6.88872	5.7299	8.04754	6.88872
1700034J05Rik	NM_001164236	1.34624	1.92885	1.63754	1.61736	2.09587	1.85662
1700034J05Rik	NM_028509	0.271124	0.167021	0.219073	1.61736	2.09587	1.85662
1700034K08Rik (ncRNA)	NR_040756	0	3.26812	1.63406	0	3.26812	1.63406
1700034P13Rik (ncRNA)	NR_040462	7.52906	12.0822	9.80564	7.52906	12.0822	9.80564
1700037C18Rik	NM_028484	2.78872	3.48816	3.13844	2.78872	3.48816	3.13844
1700037H04Rik	NM_001311138	20.7643	59.9152	40.3397	73.0291	63.6501	68.3396
1700037H04Rik	NM_001361375	52.0975	3.48525	27.7914	73.0291	63.6501	68.3396
1700037H04Rik	NM_026091	0.167276	0.24964	0.208458	73.0291	63.6501	68.3396
1700037H04Rik (ncRNA)	NR_154886	0.0114258	0.291846	0.151636	2.06222	3.42601	2.74411
1700037H04Rik (ncRNA)	NR_154887	2.05079	3.13417	2.59248	2.06222	3.42601	2.74411
1700039M10Rik (ncRNA)	NR_152103	1.43937	6.88638	4.16288	1.43937	6.88638	4.16288
1700040D17Rik (ncRNA)	NR_152121	2.86614	1.39915	2.13265	2.86614	1.39915	2.13265
1700042O10Rik (ncRNA)	NR_045178	2.89488	3.09023	2.99256	2.89488	3.09023	2.99256
1700047E10Rik (ncRNA)	NR_073363	2.04375	8.80341	5.42358	2.04375	8.80341	5.42358
1700047I17Rik2	NM_001100116	18.9951	19.1364	19.0658	18.9951	19.1364	19.0658
1700047I17Rik2	NM_001100116	18.9951	19.1364	19.0658	18.9951	19.1364	19.0658
1700047L14Rik (ncRNA)	NR_040691	3.12971	12.4883	7.80899	3.12971	12.4883	7.80899
1700047M11Rik (ncRNA)	NR_015458	0	2.63988	1.31994	0	2.63988	1.31994
1700048O20Rik (ncRNA)	NR_033553	10.4115	16.2877	13.3496	10.4115	16.2877	13.3496
1700049E17Rik1	NM_001358038	18.6271	26.0779	22.3525	18.6271	26.0779	22.3525
1700049E17Rik1	NM_001358038	18.6271	26.0779	22.3525	18.6271	26.0779	22.3525
1700049E17Rik2	NM_001358037	18.6271	26.0779	22.3525	18.6271	26.0779	22.3525
1700049E17Rik2	NM_001358037	18.6271	26.0779	22.3525	18.6271	26.0779	22.3525
1700049E22Rik (ncRNA)	NR_040525	0	2.60566	1.30283	0	2.60566	1.30283
1700051A21Rik (ncRNA)	NR_045922	1.38285	1.45404	1.41844	1.38285	1.45404	1.41844
1700052K11Rik (ncRNA)	NR_027956	6.69251	4.9731	5.8328	6.69251	4.9731	5.8328
1700055D16Rik (ncRNA)	NR_151454	0.978391	1.42061	1.1995	2.00955	2.72886	2.3692
1700055D16Rik (ncRNA)	NR_151455	1.03115	1.30825	1.1697	2.00955	2.72886	2.3692
1700056E22Rik	NM_028516	2.56723	3.21429	2.89076	2.56723	3.21429	2.89076
1700063D05Rik (ncRNA)	NR_040392	18.6982	13.8546	16.2764	18.6982	13.8546	16.2764
1700065D16Rik	NM_001271569	0	9.78774	4.89387	0	9.78774	4.89387
1700065D16Rik (ncRNA)	NR_073361	4.14318	0	2.07159	4.14318	0	2.07159
1700066C05Rik	NM_030146	37.9184	5.78872	21.8536	37.9184	5.78872	21.8536
1700066J03Rik (ncRNA)	NR_126543	10.2202	11.6436	10.9319	10.2202	11.6436	10.9319
1700066M21Rik	NM_028546	17.497	20.8619	19.1795	17.497	20.8619	19.1795
1700067K01Rik	NM_183097	3.11918	3.93506	3.52712	3.11918	3.93506	3.52712
1700069L16Rik (ncRNA)	NR_033216	3.90255	2.65596	3.27925	3.90255	2.65596	3.27925
1700071M16Rik (ncRNA)	NR_045444	3.63408	5.08528	4.35968	3.63408	5.08528	4.35968
1700071M16Rik (ncRNA)	NR_045445	0	0	0	3.63408	5.08528	4.35968
1700072I22Rik (ncRNA)	NR_131109	2.95896	0.809303	1.88413	2.95896	0.809303	1.88413
1700072I22Rik (ncRNA)	NR_131143	0	0	0	2.95896	0.809303	1.88413
1700080O16Rik	NM_028851	5.78401	10.3882	8.08611	5.78401	10.3882	8.08611
1700084D21Rik (ncRNA)	NR_131045	11.6467	7.47352	9.56012	11.6467	7.47352	9.56012
1700084E18Rik (ncRNA)	NR_028299	6.98804	11.2103	9.09916	6.98804	11.2103	9.09916
1700084J12Rik (ncRNA)	NR_033608	4.09463	3.09618	3.59541	4.09463	3.09618	3.59541
1700084M14Rik (ncRNA)	NR_126536	2.23069	4.5349	3.3828	2.23069	4.5349	3.3828
1700086L19Rik (ncRNA)	NR_030733	0	0	0	1.23277	2.07947	1.65612
1700086L19Rik (ncRNA)	NR_030734	0	0	0	1.23277	2.07947	1.65612
1700086L19Rik (ncRNA)	NR_030735	1.23277	2.07947	1.65612	1.23277	2.07947	1.65612
1700086O06Rik (ncRNA)	NR_015475	0	1.0683	0.53415	1.69428	1.57036	1.63232
1700086O06Rik (ncRNA)	NR_027903	1.31367	0	0.656833	1.69428	1.57036	1.63232
1700086O06Rik (ncRNA)	NR_027904	0.380612	0.502059	0.441335	1.69428	1.57036	1.63232
1700091H14Rik (ncRNA)	NR_073362	9.98041	15.6314	12.8059	9.98041	15.6314	12.8059
1700094D03Rik	NM_028567	10.2976	9.58318	9.94038	10.2976	9.58318	9.94038
1700095A21Rik (ncRNA)	NR_045468	13.7717	6.82471	10.2982	13.7717	6.82471	10.2982
1700095J03Rik (ncRNA)	NR_152110	2.14377	1.36823	1.756	2.14377	1.36823	1.756
1700096K18Rik (ncRNA)	NR_027388	0.91381	2.95517	1.93449	0.91381	2.95517	1.93449
1700097N02Rik (ncRNA)	NR_045287	3.42185	1.59654	2.50919	3.42185	1.59654	2.50919
1700099I09Rik (ncRNA)	NR_130171	0	1.1075	0.553748	1.06448	1.1075	1.08599
1700099I09Rik (ncRNA)	NR_130318	1.06448	0	0.532242	1.06448	1.1075	1.08599
1700100I10Rik (ncRNA)	NR_126548	0	1.40413	0.702064	7.86235	8.38783	8.12509
1700100I10Rik (ncRNA)	NR_126549	0	0	0	7.86235	8.38783	8.12509
1700100I10Rik (ncRNA)	NR_126550	0	0	0	7.86235	8.38783	8.12509
1700100I10Rik (ncRNA)	NR_126551	7.86235	6.9837	7.42302	7.86235	8.38783	8.12509
1700102H20Rik (ncRNA)	NR_045302	0	0	0	0	5.99869	2.99934
1700102H20Rik (ncRNA)	NR_045303	0	5.99869	2.99934	0	5.99869	2.99934
1700102P08Rik	NM_053216	4.15899	3.09335	3.62617	4.15899	3.09335	3.62617
1700105P06Rik (ncRNA)	NR_045703	3.69128	7.83817	5.76472	3.69128	7.83817	5.76472
1700108J01Rik (ncRNA)	NR_015532	5.65087	6.02558	5.83823	5.65087	6.02558	5.83823
1700109H08Rik	NM_029843	9.15651	5.24479	7.20065	9.15651	5.24479	7.20065
1700109K24Rik (ncRNA)	NR_108037	4.37383	10.3711	7.37247	4.37383	10.3711	7.37247
1700110I01Rik (ncRNA)	NR_038059	2.11891	3.41887	2.76889	2.11891	3.41887	2.76889
1700110I01Rik (ncRNA)	NR_038059	2.11891	3.41887	2.76889	2.11891	3.41887	2.76889
1700110I01Rik (ncRNA)	NR_038059	2.11891	3.41887	2.76889	2.11891	3.41887	2.76889
1700110I07Rik (ncRNA)	NR_131068	7.25078	12.1125	9.68166	7.25078	12.1125	9.68166
1700112H15Rik (ncRNA)	NR_040472	13.3696	17.0028	15.1862	13.3696	17.0028	15.1862
1700112J16Rik (ncRNA)	NR_131043	0	0	0	7.73548	19.4717	13.6036
1700112J16Rik (ncRNA)	NR_131044	7.73548	19.4717	13.6036	7.73548	19.4717	13.6036
1700113A16Rik (ncRNA)	NR_045997	6.69479	6.68174	6.68827	6.69479	6.68174	6.68827
1700123M08Rik (ncRNA)	NR_040577	3.60632	5.98801	4.79717	3.60632	5.98801	4.79717
1700123O20Rik	NM_021437	26.4747	32.9256	29.7002	26.4747	32.9256	29.7002
1700124L16Rik (ncRNA)	NR_105027	16.769	0	8.38452	16.769	0	8.38452
1700125G22Rik (ncRNA)	NR_040548	0.435376	2.88531	1.66034	0.435376	2.88531	1.66034
1700125H20Rik	NM_028589	2.91228	6.74622	4.82925	2.91228	6.74622	4.82925
1700128F08Rik (ncRNA)	NR_033618	10.6163	16.1771	13.3967	10.6163	16.1771	13.3967
1810007D17Rik (ncRNA)	NR_038136	0.649083	2.17743	1.41326	0.649083	2.17743	1.41326
1810009A15Rik	NM_025463	19.8891	29.8325	24.8608	19.8891	29.8325	24.8608
1810009A15Rik (ncRNA)	NR_104416	40.2347	28.6125	34.4236	40.2347	28.6125	34.4236
1810010H24Rik	NM_001163473	2.46627	1.75505	2.11066	2.46627	1.75505	2.11066
1810013A23Rik (ncRNA)	NR_045427	3.14364	5.06971	4.10668	3.14364	5.06971	4.10668
1810013L24Rik	NM_001081400	44.4268	49.4639	46.9453	44.4268	49.4639	46.9453
1810014B01Rik (ncRNA)	NR_015572	11.8899	7.77615	9.833	11.8899	7.77615	9.833
1810019D21Rik (ncRNA)	NR_040344	0	0	0	1.27537	0.820461	1.04792
1810019D21Rik (ncRNA)	NR_040345	0	0	0	1.27537	0.820461	1.04792
1810019D21Rik (ncRNA)	NR_040346	1.27537	0.820461	1.04792	1.27537	0.820461	1.04792
1810022K09Rik	NM_001099674	126.333	30.1869	78.2599	329.852	279.891	304.871
1810022K09Rik	NM_001347206	203.519	249.704	226.612	329.852	279.891	304.871
1810024B03Rik	NM_198630	1.34729	1.6687	1.50799	1.34729	1.6687	1.50799
1810026B05Rik (ncRNA)	NR_037569	6.04809	5.84871	5.9484	6.04809	5.84871	5.9484
1810030O07Rik	NM_175141	45.6173	47.9106	46.7639	45.6173	47.9106	46.7639
1810032O08Rik (ncRNA)	NR_027819	10.5153	14.1332	12.3243	21.6027	24.4219	23.0123
1810032O08Rik (ncRNA)	NR_027820	0	0	0	21.6027	24.4219	23.0123
1810032O08Rik (ncRNA)	NR_027821	11.0873	10.2887	10.688	21.6027	24.4219	23.0123
1810034E14Rik (ncRNA)	NR_045798	2.09247	2.88362	2.48805	2.09247	2.88362	2.48805
1810037I17Rik	NM_024461	75.6143	79.4788	77.5465	75.6143	79.4788	77.5465
1810041H14Rik (ncRNA)	NR_130999	0	0	0	0	5.12308	2.56154
1810041H14Rik (ncRNA)	NR_131000	0	5.12308	2.56154	0	5.12308	2.56154
1810041H14Rik (ncRNA)	NR_131002	0	0	0	0	5.12308	2.56154
1810043G02Rik	NM_026431	3.80729	2.92438	3.36583	3.80729	2.92438	3.36583
1810044D09Rik (ncRNA)	NR_038153	22.0384	18.9569	20.4976	22.0384	18.9569	20.4976
1810053B23Rik (ncRNA)	NR_040486	0	0	0	2.84911	3.23521	3.04216
1810053B23Rik (ncRNA)	NR_040487	0.600389	0.576365	0.588377	2.84911	3.23521	3.04216
1810053B23Rik (ncRNA)	NR_040488	0.474321	1.28258	0.878452	2.84911	3.23521	3.04216
1810053B23Rik (ncRNA)	NR_040489	1.7744	0.00598287	0.890191	2.84911	3.23521	3.04216
1810053B23Rik (ncRNA)	NR_040490	0	0	0	2.84911	3.23521	3.04216
1810053B23Rik (ncRNA)	NR_040491	0	1.37028	0.685141	2.84911	3.23521	3.04216
1810055G02Rik	NM_001358256	6.75296	3.48341	5.11818	42.4901	37.9777	40.2339
1810055G02Rik	NM_001358257	27.8542	34.4943	31.1742	42.4901	37.9777	40.2339
1810055G02Rik	NM_001358258	7.40618	0	3.70309	42.4901	37.9777	40.2339
1810055G02Rik	NM_028077	0.476744	0	0.238372	42.4901	37.9777	40.2339
1810058I24Rik (ncRNA)	NR_015608	2.54262	0.000611456	1.27162	57.8839	54.636	56.26
1810058I24Rik (ncRNA)	NR_027875	55.3413	54.6354	54.9883	57.8839	54.636	56.26
1810062O18Rik (ncRNA)	NR_033571	4.95579	6.37508	5.66544	4.95579	6.37508	5.66544
1810064F22Rik (ncRNA)	NR_027981	2.25148	3.55119	2.90134	2.25148	3.55119	2.90134
2010001A14Rik (ncRNA)	NR_131042	3.85516	5.72307	4.78912	3.85516	5.72307	4.78912
2010003K11Rik	NM_027237	1.19823	2.36069	1.77946	1.19823	2.36069	1.77946
2010005H15Rik	NM_029733	7.33525	7.0201	7.17768	7.33525	7.0201	7.17768
2010010A06Rik (ncRNA)	NR_045393	0	0	0	0.923229	1.79109	1.35716
2010010A06Rik (ncRNA)	NR_045394	0.923229	1.79109	1.35716	0.923229	1.79109	1.35716
2010109A12Rik	NM_029363	2.67672	2.13295	2.40484	2.67672	2.13295	2.40484
2010109I03Rik	NM_025929	3.76604	4.18802	3.97703	3.76604	4.18802	3.97703
2010111I01Rik	NM_001289924	2.43249	4.14357	3.28803	8.73177	11.2151	9.97345
2010111I01Rik	NM_001289926	6.29928	7.07156	6.68542	8.73177	11.2151	9.97345
2010111I01Rik (ncRNA)	NR_110520	8.06214	0.812059	4.4371	13.1205	4.93729	9.02889
2010111I01Rik (ncRNA)	NR_110521	5.05836	4.12523	4.59179	13.1205	4.93729	9.02889
2010204K13Rik (ncRNA)	NR_027924	0	0	0	1.14287	3.63809	2.39048
2010204K13Rik (ncRNA)	NR_027925	1.14287	3.63809	2.39048	1.14287	3.63809	2.39048
2010300C02Rik	NM_028096	34.047	30.9922	32.5196	34.047	30.9922	32.5196
2010315B03Rik	NM_001243117	3.61858e-06	0	1.80929e-06	5.61082	7.99355	6.80219
2010315B03Rik	NM_001243118	5.61072	1.52036e-06	2.80536	5.61082	7.99355	6.80219
2010315B03Rik	NM_001243119	9.80411e-05	7.99355	3.99682	5.61082	7.99355	6.80219
2010320M18Rik (ncRNA)	NR_029440	23.4961	27.7432	25.6197	23.4961	27.7432	25.6197
2200002D01Rik	NM_028179	3.02126	0	1.51063	3.02126	0	1.51063
2210010C04Rik	NM_023333	1.82566	1.8114	1.81853	1.82566	1.8114	1.81853
2210011C24Rik	NM_001291292	0.476848	1.55111	1.01398	0.476848	1.55111	1.01398
2210016F16Rik	NM_027335	23.0111	23.0513	23.0312	23.0111	23.0513	23.0312
2210016L21Rik	NM_028211	24.2797	29.7348	27.0072	24.2797	29.7348	27.0072
2210039B01Rik (ncRNA)	NR_044985	31.9996	31.2312	31.6154	31.9996	31.2312	31.6154
2210406O10Rik (ncRNA)	NR_126488	0	1.02076	0.51038	1.15413	2.29463	1.72438
2210406O10Rik (ncRNA)	NR_126489	0.397076	0	0.198538	1.15413	2.29463	1.72438
2210406O10Rik (ncRNA)	NR_126490	0.757056	1.27387	1.01546	1.15413	2.29463	1.72438
2210408F21Rik (ncRNA)	NR_040257	0.850555	1.0751	0.962825	11.3071	5.23963	8.27338
2210408F21Rik (ncRNA)	NR_040258	0	0	0	11.3071	5.23963	8.27338
2210408F21Rik (ncRNA)	NR_040259	0	0	0	11.3071	5.23963	8.27338
2210408F21Rik (ncRNA)	NR_040260	5.17964	0	2.58982	11.3071	5.23963	8.27338
2210408F21Rik (ncRNA)	NR_040261	5.27693	0	2.63846	11.3071	5.23963	8.27338
2210408F21Rik (ncRNA)	NR_040262	0	4.16454	2.08227	11.3071	5.23963	8.27338
2210408I21Rik	NM_001081353	6.6212	4.01425	5.31772	7.55225	7.45562	7.50393
2210408I21Rik	NM_001145676	0.931052	3.44137	2.18621	7.55225	7.45562	7.50393
2210418O10Rik	NM_001305136	1.20788e-08	4.59393	2.29696	12.8974	12.9517	12.9245
2210418O10Rik	NM_001305136	1.20788e-08	4.59393	2.29696	12.8974	12.9517	12.9245
2210418O10Rik	NM_001305137	12.8974	8.35773	10.6275	12.8974	12.9517	12.9245
2210418O10Rik	NM_001305137	12.8974	8.35773	10.6275	12.8974	12.9517	12.9245
2210418O10Rik (ncRNA)	NR_130971	1.69988	2.18642	1.94315	1.69988	2.18642	1.94315
2210418O10Rik (ncRNA)	NR_130971	1.69988	2.18642	1.94315	1.69988	2.18642	1.94315
2210420H20Rik (ncRNA)	NR_045389	0.993962	3.16098	2.07747	0.993962	3.16098	2.07747
2300009A05Rik	NM_027090	14.6303	14.9601	14.7952	14.6303	14.9601	14.7952
2310003N18Rik (ncRNA)	NR_131161	0	3.54446	1.77223	0	3.54446	1.77223
2310005A03Rik (ncRNA)	NR_040634	1.12581	0.922698	1.02425	1.12581	0.922698	1.02425
2310009A05Rik	NM_001308425	8.52366	19.064	13.7938	8.52366	19.064	13.7938
2310009B15Rik	NM_001081226	38.9032	40.6545	39.7788	38.9032	40.6545	39.7788
2310010J17Rik (ncRNA)	NR_046006	9.93257	41.96	25.9463	115.368	154.989	135.179
2310010J17Rik (ncRNA)	NR_046007	105.436	113.029	109.233	115.368	154.989	135.179
2310011J03Rik	NM_025521	12.6049	12.963	12.7839	12.6049	12.963	12.7839
2310015A10Rik (ncRNA)	NR_033514	5.42941	5.72403	5.57672	5.42941	5.72403	5.57672
2310022A10Rik	NM_001122767	3.98253	0	1.99127	12.8012	7.90345	10.3523
2310022A10Rik	NM_175107	8.81866	7.90345	8.36106	12.8012	7.90345	10.3523
2310022B05Rik	NM_175149	7.30116	6.42875	6.86496	7.30116	6.42875	6.86496
2310030G06Rik	NM_025865	3.68689	3.88591	3.7864	3.68689	3.88591	3.7864
2310033P09Rik	NM_024210	22.0636	23.4264	22.745	22.0636	23.4264	22.745
2310034G01Rik (ncRNA)	NR_040418	4.84976	11.9278	8.38878	4.84976	11.9278	8.38878
2310039H08Rik	NM_025966	38.5772	38.4702	38.5237	38.5772	38.4702	38.5237
2310039L15Rik (ncRNA)	NR_045337	186.904	229.855	208.379	186.904	229.855	208.379
2310040G24Rik (ncRNA)	NR_040292	5.17289	4.47858	4.82574	5.17289	14.5633	9.86809
2310040G24Rik (ncRNA)	NR_040293	0	10.0847	5.04236	5.17289	14.5633	9.86809
2310043M15Rik (ncRNA)	NR_151466	1.98793	1.46389	1.72591	1.98793	1.46389	1.72591
2310057M21Rik	NM_026655	15.5196	10.3166	12.9181	15.5196	10.3166	12.9181
2310057M21Rik (ncRNA)	NR_152380	7.48951	12.2812	9.88536	7.48951	12.2812	9.88536
2310061I04Rik	NM_001033630	69.5286	71.3184	70.4235	69.5286	71.3184	70.4235
2310068J16Rik (ncRNA)	NR_028124	6.72703	7.61939	7.17321	6.72703	7.61939	7.17321
2310075C17Rik (ncRNA)	NR_131053	2.36546	3.7956	3.08053	2.36546	3.7956	3.08053
2310081J21Rik (ncRNA)	NR_045474	12.4268	24.2124	18.3196	12.4268	24.2124	18.3196
2310081J21Rik (ncRNA)	NR_045474	12.4268	24.2124	18.3196	12.4268	24.2124	18.3196
2400006E01Rik (ncRNA)	NR_130791	10.4118	14.014	12.2129	10.4118	14.014	12.2129
2410002F23Rik	NM_025880	67.8119	63.2626	65.5373	67.8119	63.2626	65.5373
2410003L11Rik (ncRNA)	NR_045496	10.4502	3.32446	6.88735	10.4502	3.32446	6.88735
2410004B18Rik	NM_001356284	0	7.02062	3.51031	24.5206	22.4983	23.5095
2410004B18Rik	NM_025555	24.5206	15.4777	19.9991	24.5206	22.4983	23.5095
2410004B18Rik (ncRNA)	NR_151445	9.11029	9.25901	9.18465	9.11029	13.8182	11.4642
2410004B18Rik (ncRNA)	NR_151446	0	4.55914	2.27957	9.11029	13.8182	11.4642
2410004I01Rik (ncRNA)	NR_037963	0.7968	1.32773	1.06226	0.7968	1.32773	1.06226
2410004P03Rik	NM_001201332	0	2.71379e-09	1.3569e-09	1.63939	2.8454	2.2424
2410004P03Rik	NM_001201333	1.63939	2.8454	2.2424	1.63939	2.8454	2.2424
2410006H16Rik (ncRNA)	NR_030738	106.044	149.122	127.583	106.044	149.122	127.583
2410012E07Rik (ncRNA)	NR_045939	1.00538	1.72571	1.36554	1.00538	1.72571	1.36554
2410015M20Rik	NM_153152	129.944	112.307	121.126	129.944	112.307	121.126
2410018L13Rik (ncRNA)	NR_015504	2.37244	2.24575	2.3091	2.37244	2.24575	2.3091
2410021H03Rik (ncRNA)	NR_045428	3.82048	5.02383	4.42216	3.82048	5.02383	4.42216
2410022M11Rik (ncRNA)	NR_152252	1.56032	2.7537	2.15701	1.56032	2.7537	2.15701
2410131K14Rik	NM_001081236	18.4578	15.0254	16.7416	18.4578	15.0254	16.7416
2410141K09Rik	NM_001290196	57.5006	69.0828	63.2917	60.6303	74.252	67.4412
2410141K09Rik	NM_183119	3.12971	5.16919	4.14945	60.6303	74.252	67.4412
2500002B13Rik (ncRNA)	NR_126553	11.0111	9.23799	10.1245	11.0111	9.23799	10.1245
2500002B13Rik (ncRNA)	NR_126555	0	0	0	11.0111	9.23799	10.1245
2500002B13Rik (ncRNA)	NR_126556	0	0	0	11.0111	9.23799	10.1245
2500004C02Rik (ncRNA)	NR_040318	33.8469	40.9224	37.3846	33.8469	40.9224	37.3846
2510002D24Rik	NM_001033164	3.93289	4.50232	4.2176	3.93289	4.50232	4.2176
2510003B16Rik (ncRNA)	NR_131048	4.55648	0	2.27824	4.55648	0	2.27824
2510009E07Rik	NM_001001881	1.2179	2.94259	2.08025	1.2179	2.94259	2.08025
2510039O18Rik	NM_029841	26.667	29.6543	28.1606	26.667	29.6543	28.1606
2610001J05Rik	NM_001352887	2.33997	2.53243	2.4362	2.33997	2.53243	2.4362
2610002M06Rik	NM_025921	3.45224	4.37793	3.91509	3.45224	4.37793	3.91509
2610005L07Rik (ncRNA)	NR_028428	17.4405	16.5415	16.991	17.4405	16.5415	16.991
2610008E11Rik	NM_001004362	6.87064	0.261172	3.56591	15.0846	15.764	15.4243
2610008E11Rik	NM_001359715	8.214	3.07901	5.6465	15.0846	15.764	15.4243
2610008E11Rik	NM_001359717	0	12.4238	6.21189	15.0846	15.764	15.4243
2610016A17Rik (ncRNA)	NR_045347	7.44261	5.9512	6.6969	7.44261	5.9512	6.6969
2610020C07Rik (ncRNA)	NR_038156	8.52696	12.6011	10.564	8.52696	12.6011	10.564
2610024D14Rik (ncRNA)	NR_151470	10.777	11.7254	11.2512	10.777	11.7254	11.2512
2610027K06Rik (ncRNA)	NR_077059	3.28938	2.41992	2.85465	3.28938	2.41992	2.85465
2610035D17Rik (ncRNA)	NR_015556	6.24639	6.67314	6.45976	6.24639	6.67314	6.45976
2610037D02Rik (ncRNA)	NR_040423	4.00196	3.89581	3.94888	4.00196	3.89581	3.94888
2610042L04Rik	NM_001309398	4.21855	1.73056	2.97456	4.21855	1.73056	2.97456
2610044O15Rik8	NM_153780	20.0193	19.9466	19.983	20.0193	19.9466	19.983
2610206C17Rik (ncRNA)	NR_038175	2.14387	1.30568	1.72477	2.14387	1.30568	1.72477
2610301B20Rik	NM_026005	18.4243	23.4996	20.962	18.4243	23.4996	20.962
2610306M01Rik (ncRNA)	NR_028298	1.81195	4.4685	3.14022	1.81195	4.4685	3.14022
2610307P16Rik (ncRNA)	NR_045053	8.41958	11.2189	9.81923	23.2211	31.3639	27.2925
2610307P16Rik (ncRNA)	NR_045054	14.8016	20.1451	17.4733	23.2211	31.3639	27.2925
2610318N02Rik	NM_001358255	7.67242	8.35518e-05	3.83625	16.7899	11.9697	14.3798
2610318N02Rik	NM_183287	9.11752	11.9696	10.5436	16.7899	11.9697	14.3798
2610507B11Rik	NM_001002004	180.572	201.631	191.101	180.572	201.631	191.101
2610507I01Rik (ncRNA)	NR_037964	10.2604	8.55042	9.40542	10.2604	8.55042	9.40542
2610524H06Rik	NM_181075	107.796	146.286	127.041	107.796	146.286	127.041
2700012I20Rik (ncRNA)	NR_152107	1.94352	13.6666	7.80506	1.94352	13.6666	7.80506
2700038G22Rik (ncRNA)	NR_045040	10.7755	0	5.38775	24.9533	25.8367	25.395
2700038G22Rik (ncRNA)	NR_045042	14.1778	25.8367	20.0072	24.9533	25.8367	25.395
2700046A07Rik (ncRNA)	NR_037693	0.806288	1.58573	1.19601	0.806288	1.58573	1.19601
2700046G09Rik (ncRNA)	NR_033198	3.36642	0.712628	2.03952	3.36642	0.712628	2.03952
2700049A03Rik	NM_001163378	14.9577	23.0685	19.0131	22.8349	26.2555	24.5452
2700049A03Rik	NM_029818	7.87714	3.18706	5.5321	22.8349	26.2555	24.5452
2700054A10Rik (ncRNA)	NR_045436	4.65757	5.74614	5.20186	4.65757	6.08536	5.37147
2700054A10Rik (ncRNA)	NR_045437	0	0.339219	0.16961	4.65757	6.08536	5.37147
2700062C07Rik	NM_026529	28.7499	30.2388	29.4944	28.7499	30.2388	29.4944
2700069I18Rik (ncRNA)	NR_045905	3.01097	6.66426	4.83761	3.01097	6.66426	4.83761
2700070H01Rik (ncRNA)	NR_046019	8.11519	8.72149	8.41834	8.11519	8.72149	8.41834
2700081O15Rik	NM_175381	8.71686	9.43029	9.07358	8.71686	9.43029	9.07358
2700089I24Rik (ncRNA)	NR_045308	5.72599	8.27735	7.00167	5.72599	8.27735	7.00167
2700097O09Rik	NM_028314	13.1803	23.0845	18.1324	13.1803	23.0845	18.1324
2700097O09Rik (ncRNA)	NR_030764	12.8561	0	6.42806	12.8561	0	6.42806
2700097O09Rik (ncRNA)	NR_155260	0	0	0	12.8561	0	6.42806
2700099C18Rik (ncRNA)	NR_024720	49.7228	56.8101	53.2665	49.7228	56.8101	53.2665
2810001G20Rik (ncRNA)	NR_033780	26.4448	31.5199	28.9823	26.4448	31.5199	28.9823
2810002D19Rik (ncRNA)	NR_027831	13.9216	9.82115	11.8714	13.9216	9.82115	11.8714
2810004N23Rik	NM_025615	107.114	127.44	117.277	107.114	127.44	117.277
2810006K23Rik	NM_001134717	34.7352	31.8805	33.3078	37.197	33.1857	35.1914
2810006K23Rik	NM_028310	2.46179	1.30527	1.88353	37.197	33.1857	35.1914
2810013P06Rik (ncRNA)	NR_045268	23.1577	18.1199	20.6388	23.1577	18.1199	20.6388
2810021J22Rik	NM_172403	7.39038	9.97916	8.68477	7.39038	9.97916	8.68477
2810025M15Rik (ncRNA)	NR_027984	32.4737	43.8778	38.1757	32.4737	43.8778	38.1757
2810029C07Rik (ncRNA)	NR_045295	4.92873	6.42106	5.6749	4.92873	6.42106	5.6749
2810032G03Rik (ncRNA)	NR_015579	6.51952	6.1581	6.33881	6.51952	6.1581	6.33881
2810047C21Rik1 (ncRNA)	NR_015598	6.4577	8.56663	7.51217	13.6894	20.663	17.1762
2810047C21Rik1 (ncRNA)	NR_015598	6.4577	8.56663	7.51217	13.6894	20.663	17.1762
2810047C21Rik1 (ncRNA)	NR_015598	6.4577	8.56663	7.51217	13.6894	20.663	17.1762
2810047C21Rik1 (ncRNA)	NR_154463	7.2317	12.0964	9.66403	13.6894	20.663	17.1762
2810047C21Rik1 (ncRNA)	NR_154463	7.2317	12.0964	9.66403	13.6894	20.663	17.1762
2810047C21Rik1 (ncRNA)	NR_154463	7.2317	12.0964	9.66403	13.6894	20.663	17.1762
2810403D21Rik (ncRNA)	NR_015493	5.92411	8.00121	6.96266	5.92411	8.00121	6.96266
2810408A11Rik	NM_001316696	2.0872	3.846	2.9666	3.97207	3.846	3.90904
2810408A11Rik	NM_001316697	0	0	0	3.97207	3.846	3.90904
2810408A11Rik	NM_001316698	0	0	0	3.97207	3.846	3.90904
2810408A11Rik	NM_001363161	0	0	0	3.97207	3.846	3.90904
2810408A11Rik	NM_027419	1.88487	0	0.942435	3.97207	3.846	3.90904
2810408I11Rik (ncRNA)	NR_038009	18.7746	26.9981	22.8864	18.7746	26.9981	22.8864
2810410L24Rik (ncRNA)	NR_030682	2.66482	3.25419	2.95951	2.66482	3.25419	2.95951
2810414N06Rik (ncRNA)	NR_151473	2.98019	5.5143	4.24725	2.98019	5.5143	4.24725
2810414N06Rik (ncRNA)	NR_151474	0	0	0	2.98019	5.5143	4.24725
2810414N06Rik (ncRNA)	NR_151475	0	0	0	2.98019	5.5143	4.24725
2810429I04Rik (ncRNA)	NR_015522	11.7293	6.79426	9.26179	11.7293	6.79426	9.26179
2810433D01Rik (ncRNA)	NR_033474	1.17596	1.96256	1.56926	1.17596	1.96256	1.56926
2810454H06Rik (ncRNA)	NR_029441	3.27948	2.88661	3.08305	3.27948	2.88661	3.08305
2810459M11Rik	NM_001144992	0.403182	0.516127	0.459654	2.60916	2.46877	2.53896
2810459M11Rik	NM_001144993	2.20598	1.95264	2.07931	2.60916	2.46877	2.53896
2810468N07Rik (ncRNA)	NR_045176	3.77124	2.67495	3.2231	3.77124	2.67495	3.2231
2810471M01Rik (ncRNA)	NR_045906	2.65797	2.12851	2.39324	2.65797	2.12851	2.39324
2900005J15Rik (ncRNA)	NR_027851	2.66807	2.79542	2.73174	2.66807	2.79542	2.73174
2900009J06Rik (ncRNA)	NR_045298	2.0618	0	1.0309	2.0618	0	1.0309
2900026A02Rik	NM_001347397	3.54189	8.87088	6.20638	29.2297	23.571	26.4003
2900026A02Rik	NM_172884	25.6878	14.7002	20.194	29.2297	23.571	26.4003
2900040C04Rik (ncRNA)	NR_152108	0	5.84606	2.92303	0	5.84606	2.92303
2900041M22Rik (ncRNA)	NR_015489	7.79256	5.25479	6.52368	7.79256	5.25479	6.52368
2900052L18Rik (ncRNA)	NR_151480	5.63355	7.82286	6.72821	5.63355	7.82286	6.72821
2900052N01Rik (ncRNA)	NR_015605	0.930213	1.21809	1.07415	0.930213	1.21809	1.07415
2900060B14Rik (ncRNA)	NR_027901	1.10161	1.7529	1.42726	1.10161	1.7529	1.42726
2900076A07Rik (ncRNA)	NR_045299	4.07895	5.90103	4.98999	4.07895	5.90103	4.98999
2900092D14Rik (ncRNA)	NR_027891	6.13507	9.88247	8.00877	6.13507	9.88247	8.00877
2900093K20Rik (ncRNA)	NR_151490	9.60251	6.7894	8.19595	9.60251	6.7894	8.19595
2900097C17Rik (ncRNA)	NR_024329	66.905	68.0561	67.4806	66.905	68.0561	67.4806
3000002C10Rik (ncRNA)	NR_033215	3.28311	8.3265	5.80481	3.28311	8.3265	5.80481
3010003L21Rik (ncRNA)	NR_144294	11.0483	12.661	11.8546	11.0483	12.661	11.8546
3110009E18Rik	NM_001172074	6.99487	6.54447	6.76967	15.0556	19.5014	17.2785
3110009E18Rik	NM_028439	8.06072	12.957	10.5089	15.0556	19.5014	17.2785
3110009F21Rik (ncRNA)	NR_045466	1.70007	2.04513	1.8726	1.70007	2.04513	1.8726
3110015C05Rik (ncRNA)	NR_045908	12.4186	16.1036	14.2611	12.4186	16.1036	14.2611
3110021A11Rik (ncRNA)	NR_030776	3.82015	5.65415	4.73715	3.82015	5.65415	4.73715
3110040N11Rik	NM_026077	18.0981	17.7694	17.9338	18.0981	17.7694	17.9338
3110045C21Rik (ncRNA)	NR_040438	15.2118	17.7505	16.4811	15.2118	17.7505	16.4811
3110056K07Rik (ncRNA)	NR_045055	4.22025	0.98117	2.60071	28.3854	33.1484	30.7669
3110056K07Rik (ncRNA)	NR_045056	24.1651	32.1673	28.1662	28.3854	33.1484	30.7669
3110082I17Rik	NM_028469	29.9912	39.6974	34.8443	29.9912	39.6974	34.8443
3110082J24Rik	NM_001256263	6.58119	9.51499	8.04809	6.58119	9.51499	8.04809
3200001D21Rik (ncRNA)	NR_045888	1.31048	0.730372	1.02043	1.31048	0.730372	1.02043
3300002I08Rik	NM_027017	0.966823	7.53182	4.24932	0.966823	7.53182	4.24932
3632454L22Rik (ncRNA)	NR_040281	0	0	0	3.31728	5.06338	4.19033
3632454L22Rik (ncRNA)	NR_040282	0	0	0	3.31728	5.06338	4.19033
3632454L22Rik (ncRNA)	NR_040283	3.31728	5.06338	4.19033	3.31728	5.06338	4.19033
3830403N18Rik	NM_027510	36.5615	40.9954	38.7784	36.5615	40.9954	38.7784
3830406C13Rik	NM_001284383	0	0	0	9.78089	12.7813	11.2811
3830406C13Rik	NM_001284384	8.0075	0	4.00375	9.78089	12.7813	11.2811
3830406C13Rik	NM_001284385	0.636597	10.9097	5.77316	9.78089	12.7813	11.2811
3830406C13Rik	NM_001284386	0	0	0	9.78089	12.7813	11.2811
3830406C13Rik	NM_001284387	0	0	0	9.78089	12.7813	11.2811
3830406C13Rik	NM_146051	1.13679	1.87154	1.50417	9.78089	12.7813	11.2811
3830406C13Rik	NM_178141	0	0	0	9.78089	12.7813	11.2811
3830408C21Rik (ncRNA)	NR_015471	5.07929	4.26391	4.6716	5.07929	4.26391	4.6716
3830417A13Rik	NM_027512	4.77472	3.43488	4.1048	4.77472	3.43488	4.1048
4631405J19Rik (ncRNA)	NR_110333	1.34589	3.03438	2.19013	1.34589	3.03438	2.19013
4632404H12Rik (ncRNA)	NR_130957	15.6958	13.277	14.4864	15.6958	13.277	14.4864
4632415L05Rik (ncRNA)	NR_027985	10.2174	8.67081	9.44409	10.2174	8.67081	9.44409
4632427E13Rik (ncRNA)	NR_015510	18.3422	18.789	18.5656	18.3422	18.789	18.5656
4732471J01Rik (ncRNA)	NR_015569	2.80899	3.19228	3.00063	6.46673	6.06132	6.26402
4732471J01Rik (ncRNA)	NR_073027	3.65775	1.7758	2.71677	6.46673	6.06132	6.26402
4732471J01Rik (ncRNA)	NR_073028	0	1.09324	0.54662	6.46673	6.06132	6.26402
4732491K20Rik (ncRNA)	NR_045290	0.997067	1.82198	1.40952	0.997067	1.82198	1.40952
4831440E17Rik (ncRNA)	NR_030700	6.95953	7.5672	7.26336	6.95953	7.5672	7.26336
4833412C05Rik (ncRNA)	NR_045954	2.11901	2.36979	2.2444	2.11901	2.36979	2.2444
4833415N18Rik (ncRNA)	NR_126430	1.47676	1.72565	1.60121	1.47676	1.72565	1.60121
4833417C18Rik (ncRNA)	NR_045187	10.3822	16.8345	13.6084	10.3822	16.8345	13.6084
4833419F23Rik (ncRNA)	NR_040328	5.72234	7.05125	6.38679	5.72234	7.05125	6.38679
4833420G17Rik	NM_001113550	5.2268	0	2.6134	58.0917	57.3514	57.7216
4833420G17Rik	NM_001360805	0	1.46929	0.734647	58.0917	57.3514	57.7216
4833420G17Rik	NM_026127	52.8649	55.8821	54.3735	58.0917	57.3514	57.7216
4833420G17Rik (ncRNA)	NR_153825	9.21007	13.0421	11.1261	9.21007	13.0421	11.1261
4833422C13Rik (ncRNA)	NR_015501	0	0	0	0.736164	1.84758	1.29187
4833422C13Rik (ncRNA)	NR_028313	0.184458	1.23751	0.710986	0.736164	1.84758	1.29187
4833422C13Rik (ncRNA)	NR_028314	0.551706	0.610068	0.580887	0.736164	1.84758	1.29187
4833422M21Rik (ncRNA)	NR_130160	0.794236	1.35667	1.07545	0.794236	1.35667	1.07545
4833427F10Rik (ncRNA)	NR_045459	9.59616	7.98622	8.79119	9.59616	7.98622	8.79119
4833427G06Rik	NM_177702	0	3.27253	1.63627	0	3.27253	1.63627
4833439L19Rik	NM_001252645	0.000261322	5.31662	2.65844	84.5767	83.6703	84.1235
4833439L19Rik	NM_001252646	18.2219	50.5179	34.3699	84.5767	83.6703	84.1235
4833439L19Rik	NM_001252647	27.8542	1.68618	14.7702	84.5767	83.6703	84.1235
4833439L19Rik	NM_001252648	4.00257e-05	4.73359e-06	2.23796e-05	84.5767	83.6703	84.1235
4833439L19Rik	NM_133797	38.5003	26.1497	32.325	84.5767	83.6703	84.1235
4921507G05Rik (ncRNA)	NR_152102	1.12765	1.86872	1.49819	1.12765	1.86872	1.49819
4921507P07Rik	NM_027564	3.78451	5.27277	4.52864	3.78451	5.27277	4.52864
4921511C10Rik (ncRNA)	NR_045502	0.743145	2.07104	1.40709	0.743145	2.07104	1.40709
4921511I17Rik (ncRNA)	NR_045829	1.79428	1.65193	1.72311	1.79428	1.65193	1.72311
4921513I03Rik (ncRNA)	NR_038000	1.93673	0.777194	1.35696	1.93673	0.777194	1.35696
4921513I03Rik (ncRNA)	NR_038003	0	0	0	1.93673	0.777194	1.35696
4921515E04Rik (ncRNA)	NR_045711	5.25141	6.33343	5.79242	5.25141	6.33343	5.79242
4921518K17Rik (ncRNA)	NR_131110	3.85404	4.75931	4.30668	3.85404	4.75931	4.30668
4921524J17Rik	NM_025722	18.5245	20.9574	19.741	18.5245	20.9574	19.741
4921529L05Rik (ncRNA)	NR_110484	1.37008	2.37336	1.87172	1.37008	2.37336	1.87172
4921531C22Rik (ncRNA)	NR_033782	8.14061	4.40609	6.27335	8.14061	4.40609	6.27335
4921531P14Rik (ncRNA)	NR_045361	39.2763	40.9741	40.1252	39.2763	40.9741	40.1252
4921534H16Rik (ncRNA)	NR_110443	2.48797	4.6747	3.58133	2.48797	4.6747	3.58133
4921536K21Rik	NM_026150	4.35204	2.45661	3.40432	4.35204	2.45661	3.40432
4922502B01Rik (ncRNA)	NR_151498	1.26068	2.42878	1.84473	1.26068	2.42878	1.84473
4930402H24Rik	NM_001311147	19.0809	19.5025	19.2917	23.8473	25.2831	24.5652
4930402H24Rik	NM_029432	4.76642	5.78054	5.27348	23.8473	25.2831	24.5652
4930404H11Rik (ncRNA)	NR_045941	1.39556	1.18122	1.28839	1.39556	1.18122	1.28839
4930405A21Rik (ncRNA)	NR_040505	1.76612	2.20365	1.98488	1.76612	2.20365	1.98488
4930405J17Rik (ncRNA)	NR_045350	1.66771	2.78708	2.22739	1.66771	2.78708	2.22739
4930405O22Rik (ncRNA)	NR_130176	3.74544	6.32393	5.03468	3.74544	6.32393	5.03468
4930412C18Rik (ncRNA)	NR_030693	2.81852	2.96875	2.89364	2.81852	2.96875	2.89364
4930413G21Rik (ncRNA)	NR_045614	56.2776	60.5629	58.4203	56.2776	60.5629	58.4203
4930414N06Rik (ncRNA)	NR_040294	0	2.43376	1.21688	0	2.43376	1.21688
4930417O22Rik (ncRNA)	NR_045806	6.44091	9.75815	8.09953	6.44091	9.75815	8.09953
4930422M22Rik (ncRNA)	NR_151500	3.47264	8.83516	6.1539	3.47264	8.83516	6.1539
4930429H19Rik (ncRNA)	NR_105062	3.69077	2.61821	3.15449	3.69077	2.61821	3.15449
4930430F08Rik	NM_175128	14.0531	14.3374	14.1952	14.0531	14.3374	14.1952
4930430J02Rik (ncRNA)	NR_040729	4.76787	0	2.38393	4.76787	0	2.38393
4930431F12Rik (ncRNA)	NR_073013	2.346	2.96153	2.65377	2.346	2.96153	2.65377
4930432K21Rik	NM_001163752	7.49964	6.54992e-05	3.74985	17.7563	17.7893	17.7728
4930432K21Rik	NM_029045	10.2567	17.7893	14.023	17.7563	17.7893	17.7728
4930432L08Rik (ncRNA)	NR_152115	2.62043	3.83158	3.22601	2.62043	3.83158	3.22601
4930433I11Rik	NM_207248	1.41128	0.942278	1.17678	1.41128	0.942278	1.17678
4930433N12Rik (ncRNA)	NR_027988	3.83745	3.38461	3.61103	3.83745	3.38461	3.61103
4930435F18Rik (ncRNA)	NR_153406	18.4249	22.5112	20.468	18.4249	22.5112	20.468
4930444P10Rik	NM_001243238	0	0	0	3.22426	2.11689	2.67057
4930444P10Rik	NM_001305227	3.22426	2.11689	2.67057	3.22426	2.11689	2.67057
4930447C04Rik	NM_029444	101.199	98.3046	99.752	101.199	98.3046	99.752
4930447K03Rik (ncRNA)	NR_046184	1.16123	1.2675	1.21437	1.16123	1.2675	1.21437
4930451G09Rik (ncRNA)	NR_073370	3.36782	5.39118	4.3795	3.36782	5.39118	4.3795
4930452B06Rik	NM_028934	31.3682	33.4055	32.3868	31.3682	33.4055	32.3868
4930452G13Rik (ncRNA)	NR_045060	5.73213	11.2081	8.4701	5.73213	11.2081	8.4701
4930453N24Rik	NM_026273	76.5146	90.3938	83.4542	76.5146	90.3938	83.4542
4930455C13Rik (ncRNA)	NR_045352	0.539151	3.27936	1.90926	0.539151	3.27936	1.90926
4930463O16Rik (ncRNA)	NR_108059	0.935796	1.10834	1.02207	0.935796	1.10834	1.02207
4930465K10Rik (ncRNA)	NR_027978	4.38281	4.34902	4.36591	4.38281	4.34902	4.36591
4930467D21Rik (ncRNA)	NR_045981	0.991869	1.33774	1.1648	0.991869	1.33774	1.1648
4930467E23Rik	NM_001039553	0	2.31106	1.15553	0	2.31106	1.15553
4930470G03Rik (ncRNA)	NR_151504	1.17782	2.83475	2.00628	1.17782	2.83475	2.00628
4930470H14Rik (ncRNA)	NR_045764	133.013	175.846	154.43	133.013	175.846	154.43
4930470P17Rik (ncRNA)	NR_027825	2.27867	5.42784	3.85325	2.27867	5.42784	3.85325
4930474M22Rik (ncRNA)	NR_027986	4.03027	6.37121	5.20074	4.03027	6.37121	5.20074
4930477N07Rik (ncRNA)	NR_126085	0	0	0	4.15166	3.30168	3.72667
4930477N07Rik (ncRNA)	NR_126086	4.15166	3.30168	3.72667	4.15166	3.30168	3.72667
4930478L05Rik (ncRNA)	NR_040569	2.66611	4.17597	3.42104	2.66611	4.17597	3.42104
4930480K15Rik (ncRNA)	NR_045463	3.93159	6.59687	5.26423	3.93159	6.59687	5.26423
4930480K23Rik (ncRNA)	NR_130157	2.60817	4.04482	3.3265	5.98304	6.63176	6.3074
4930480K23Rik (ncRNA)	NR_130166	3.37487	2.58693	2.9809	5.98304	6.63176	6.3074
4930481A15Rik (ncRNA)	NR_015545	1.6218	2.62001	2.1209	6.07264	4.24472	5.15868
4930481A15Rik (ncRNA)	NR_027938	4.45085	1.62472	3.03778	6.07264	4.24472	5.15868
4930482G09Rik (ncRNA)	NR_108044	3.01573	4.1622	3.58897	3.01573	4.1622	3.58897
4930483K19Rik (ncRNA)	NR_045354	1.20049	1.8818	1.54115	1.20049	1.8818	1.54115
4930502E18Rik	NM_029142	4.62309	6.64114	5.63212	4.62309	6.64114	5.63212
4930503B20Rik	NM_029144	0.687926	1.84341	1.26567	0.687926	1.84341	1.26567
4930503E14Rik	NM_029131	13.4125	10.9196	12.1661	13.4125	10.9196	12.1661
4930503L19Rik	NM_172967	16.2447	17.5087	16.8767	16.2447	17.5087	16.8767
4930504C09Rik (ncRNA)	NR_130983	1.19542	2.15716	1.67629	1.19542	2.15716	1.67629
4930504O13Rik	NM_207527	4.3906	26.1982	15.2944	4.3906	26.1982	15.2944
4930505A04Rik	NM_001100394	0.898495	1.50647	1.20248	0.898495	1.50647	1.20248
4930507D05Rik (ncRNA)	NR_027926	2.09082	2.93716	2.51399	2.09082	2.93716	2.51399
4930509E16Rik (ncRNA)	NR_045735	1.96458	3.32615	2.64537	1.96458	3.32615	2.64537
4930509G22Rik (ncRNA)	NR_151506	11.6167	14.611	13.1139	11.6167	14.611	13.1139
4930511A08Rik (ncRNA)	NR_130996	8.39411	6.80608	7.60009	8.39411	6.80608	7.60009
4930511M06Rik (ncRNA)	NR_015494	0	3.3042	1.6521	104.419	129.052	116.735
4930511M06Rik (ncRNA)	NR_027944	103.926	125.747	114.837	104.419	129.052	116.735
4930511M06Rik (ncRNA)	NR_027945	0.493187	0	0.246594	104.419	129.052	116.735
4930512B01Rik (ncRNA)	NR_033573	3.29034	3.03074	3.16054	3.29034	3.03074	3.16054
4930512M02Rik	NM_001305143	33.0993	64.0992	48.5992	33.0993	64.0992	48.5992
4930513N10Rik (ncRNA)	NR_015574	5.80838	4.8008	5.30459	5.80838	4.8008	5.30459
4930515G01Rik (ncRNA)	NR_027872	1.40268	0.928528	1.1656	1.40268	0.928528	1.1656
4930517M08Rik (ncRNA)	NR_130984	1.60126	0.659235	1.13025	1.60126	0.659235	1.13025
4930518P08Rik (ncRNA)	NR_045364	1.53063	1.48807	1.50935	1.53063	1.48807	1.50935
4930519H02Rik (ncRNA)	NR_045974	0.462545	1.58202	1.02228	0.462545	1.58202	1.02228
4930519L02Rik	NM_029164	53.1881	55.8523	54.5202	53.1881	55.8523	54.5202
4930520O04Rik (ncRNA)	NR_040383	0	0	0	3.23598	1.78772	2.51185
4930520O04Rik (ncRNA)	NR_040384	3.23598	1.78772	2.51185	3.23598	1.78772	2.51185
4930521O11Rik (ncRNA)	NR_152169	5.16404	9.7117	7.43787	5.16404	9.7117	7.43787
4930524B17Rik (ncRNA)	NR_126084	1.52693	2.66646	2.0967	1.52693	2.66646	2.0967
4930525D18Rik (ncRNA)	NR_040738	0.449557	2.17837	1.31396	0.449557	2.17837	1.31396
4930526I15Rik (ncRNA)	NR_015516	3.42804	2.13055	2.7793	8.79741	6.84986	7.82363
4930526I15Rik (ncRNA)	NR_027950	5.36937	4.7193	5.04434	8.79741	6.84986	7.82363
4930526I15Rik (ncRNA)	NR_102721	0	0	0	8.79741	6.84986	7.82363
4930528A17Rik (ncRNA)	NR_028384	3.52005	4.83548	4.17777	3.52005	4.83548	4.17777
4930528D03Rik (ncRNA)	NR_045977	14.2339	13.7838	14.0089	14.2339	13.7838	14.0089
4930529C04Rik (ncRNA)	NR_033593	1.33334	0.951818	1.14258	1.33334	0.951818	1.14258
4930533N22Rik (ncRNA)	NR_131122	15.4536	32.6287	24.0411	15.4536	32.6287	24.0411
4930539E08Rik	NM_172450	8.66679	8.46791	8.56735	8.66679	8.46791	8.56735
4930539J05Rik (ncRNA)	NR_030689	33.7269	48.7175	41.2222	33.7269	48.7175	41.2222
4930545H06Rik (ncRNA)	NR_045357	1.32422	4.49762	2.91092	1.32422	4.49762	2.91092
4930547E08Rik (ncRNA)	NR_040514	0	2.20113	1.10056	0	2.20113	1.10056
4930547E14Rik (ncRNA)	NR_040564	2.66505	4.2471	3.45607	2.66505	4.2471	3.45607
4930549G23Rik (ncRNA)	NR_045376	5.17776	4.96478	5.07127	5.17776	4.96478	5.07127
4930550C14Rik	NM_029247	1.28878	4.4467	2.86774	1.28878	4.4467	2.86774
4930550L24Rik	NM_023774	56.3695	57.2616	56.8156	56.3695	57.2616	56.8156
4930552P12Rik (ncRNA)	NR_045318	2.64732	2.26877	2.45804	2.64732	2.26877	2.45804
4930553C11Rik (ncRNA)	NR_126439	1.90745	2.04903	1.97824	1.90745	2.04903	1.97824
4930553P18Rik (ncRNA)	NR_155305	1.69026	2.2688	1.97953	1.69026	2.2688	1.97953
4930556C24Rik (ncRNA)	NR_040506	1.90805	4.93304	3.42054	1.90805	4.93304	3.42054
4930556M19Rik (ncRNA)	NR_045063	3.63091	2.72382	3.17736	9.54672	12.6716	11.1092
4930556M19Rik (ncRNA)	NR_045064	0	0	0	9.54672	12.6716	11.1092
4930556M19Rik (ncRNA)	NR_045065	5.91582	9.94783	7.93182	9.54672	12.6716	11.1092
4930556N13Rik (ncRNA)	NR_126433	5.25151	2.88861	4.07006	5.25151	2.88861	4.07006
4930557K07Rik (ncRNA)	NR_130997	0	17.3099	8.65496	0	17.3099	8.65496
4930558J18Rik (ncRNA)	NR_037999	4.18453	3.77926	3.9819	4.18453	3.77926	3.9819
4930558K02Rik	NM_001204904	1.23352	1.33441	1.28396	1.23352	1.33441	1.28396
4930558K02Rik	NM_001204905	0	0	0	1.23352	1.33441	1.28396
4930563E18Rik (ncRNA)	NR_045379	3.20018	5.35214	4.27616	3.20018	5.35214	4.27616
4930563E22Rik	NM_001163728	7.00669	11.2633	9.13501	7.00669	11.2633	9.13501
4930563F08Rik (ncRNA)	NR_040704	9.38914	7.49295	8.44104	9.38914	7.49295	8.44104
4930563M20Rik (ncRNA)	NR_046193	6.41064	6.12773	6.26919	6.41064	6.12773	6.26919
4930564C03Rik	NM_029257	1.69321	0.562225	1.12772	1.69321	0.562225	1.12772
4930565N06Rik (ncRNA)	NR_040476	19.1314	18.9772	19.0543	19.1314	18.9772	19.0543
4930570G19Rik (ncRNA)	NR_040398	0.752072	0.19491	0.473491	2.16119	0.19491	1.17805
4930570G19Rik (ncRNA)	NR_040399	1.40912	0	0.704559	2.16119	0.19491	1.17805
4930570G19Rik (ncRNA)	NR_040400	0	0	0	2.16119	0.19491	1.17805
4930571O06Rik (ncRNA)	NR_110476	4.00802	5.39059	4.69931	4.00802	5.39059	4.69931
4930577N17Rik (ncRNA)	NR_073429	6.12708	6.5871	6.35709	6.12708	6.5871	6.35709
4930578E11Rik (ncRNA)	NR_045391	3.66274	4.997	4.32987	3.66274	4.997	4.32987
4930578L24Rik (ncRNA)	NR_155448	4.35214	4.66924	4.51069	4.35214	4.66924	4.51069
4930578M01Rik (ncRNA)	NR_045991	1.94641	5.16779	3.5571	1.94641	5.16779	3.5571
4930579G18Rik (ncRNA)	NR_038053	8.47846	9.52527	9.00186	8.47846	9.52527	9.00186
4930579G24Rik	NM_029482	18.1914	17.7266	17.959	18.1914	17.7266	17.959
4930579K19Rik (ncRNA)	NR_029444	5.42274	12.4816	8.95219	5.42274	12.4816	8.95219
4930581F22Rik (ncRNA)	NR_029475	2.8062	2.74008	2.77314	2.8062	2.74008	2.77314
4930589L23Rik (ncRNA)	NR_152118	2.47228	1.00567	1.73898	2.47228	1.00567	1.73898
4930590L20Rik (ncRNA)	NR_040604	0	4.21003	2.10501	0	4.21003	2.10501
4930591A17Rik	NM_026596	8.30403	9.19248	8.74825	8.30403	9.19248	8.74825
4930592C13Rik (ncRNA)	NR_152231	0.745473	1.26993	1.0077	0.745473	1.26993	1.0077
4930592I03Rik (ncRNA)	NR_033307	1.63421	1.3591	1.49666	1.63421	1.3591	1.49666
4930594C11Rik (ncRNA)	NR_024017	3.40807	4.3851	3.89659	3.40807	4.3851	3.89659
4930594M22Rik (ncRNA)	NR_155286	5.50952	3.92592e-06	2.75476	7.98915	9.02522	8.50719
4930594M22Rik (ncRNA)	NR_155287	2.47963	9.02522	5.75242	7.98915	9.02522	8.50719
4930595D18Rik (ncRNA)	NR_130987	0.982453	4.84489	2.91367	0.982453	4.84489	2.91367
4930596I21Rik (ncRNA)	NR_108103	0	3.4931	1.74655	0	3.4931	1.74655
4930599N23Rik (ncRNA)	NR_045813	2.89016	12.9987	7.94442	2.89016	12.9987	7.94442
4931402G19Rik (ncRNA)	NR_040608	2.05525	0.785503	1.42038	2.05525	0.785503	1.42038
4931403E22Rik (ncRNA)	NR_045306	0.848056	1.41352	1.13079	0.848056	1.41352	1.13079
4931403G20Rik (ncRNA)	NR_038172	2.37433	0	1.18716	2.37433	2.25398	2.31415
4931403G20Rik (ncRNA)	NR_038173	0	2.25398	1.12699	2.37433	2.25398	2.31415
4931406B18Rik	NM_028737	1.92641	2.85369	2.39005	1.92641	2.85369	2.39005
4931406C07Rik	NM_001199484	14.2209	14.7231	14.472	16.1251	14.7231	15.4241
4931406C07Rik	NM_001199485	1.90393	0	0.951963	16.1251	14.7231	15.4241
4931406C07Rik	NM_001359258	0.000216556	0	0.000108278	16.1251	14.7231	15.4241
4931406C07Rik	NM_133732	0	0	0	16.1251	14.7231	15.4241
4931406H21Rik (ncRNA)	NR_033492	1.89798	1.97183	1.93491	1.89798	1.97183	1.93491
4931406P16Rik	NM_172741	44.1368	44.5569	44.3469	44.1368	44.5569	44.3469
4931414P19Rik	NM_028890	7.52366	8.58305	8.05335	7.52366	8.58305	8.05335
4931420L22Rik (ncRNA)	NR_040561	2.14146	4.92685	3.53416	2.14146	4.92685	3.53416
4931422A03Rik	NM_175161	2.44835	3.86349	3.15592	2.44835	3.86349	3.15592
4931428F04Rik	NM_001166394	20.6974	14.8997	17.7985	28.2073	25.5876	26.8974
4931428F04Rik	NM_028888	7.50991	10.6879	9.09888	28.2073	25.5876	26.8974
4931428L18Rik (ncRNA)	NR_033445	1.59419	7.71206	4.65313	1.59419	7.71206	4.65313
4931430N09Rik (ncRNA)	NR_046053	1.15662	2.53837	1.84749	1.15662	2.53837	1.84749
4931440P22Rik (ncRNA)	NR_027955	7.15339	8.27122	7.7123	7.15339	8.27122	7.7123
4932413F04Rik (ncRNA)	NR_040764	2.30451	3.03981	2.67216	2.30451	3.03981	2.67216
4932435O22Rik (ncRNA)	NR_027643	4.73022	5.28864	5.00943	4.73022	5.28864	5.00943
4932438A13Rik	NM_172679	110.041	132.022	121.031	110.041	132.022	121.031
4933400F21Rik (ncRNA)	NR_015540	4.20295	6.17904	5.191	4.20295	6.17904	5.191
4933401D09Rik (ncRNA)	NR_045431	3.87951	2.81732	3.34842	3.87951	2.81732	3.34842
4933402E13Rik	NM_001199996	1.07309e-07	2.47111e-07	1.7721e-07	1.03215	1.28456	1.15835
4933402E13Rik	NM_001199997	1.03215	1.28456	1.15835	1.03215	1.28456	1.15835
4933402J07Rik	NM_177901	2.21972	2.99479	2.60725	2.21972	2.99479	2.60725
4933403O08Rik	NM_001177389	11.4711	19.6675	15.5693	11.4711	19.6675	15.5693
4933404K08Rik (ncRNA)	NR_046038	2.6653	4.58909	3.6272	2.6653	4.58909	3.6272
4933404O12Rik (ncRNA)	NR_015555	4.10442	3.53321	3.81882	4.10442	3.53321	3.81882
4933405D12Rik (ncRNA)	NR_046036	5.10356	2.32624	3.7149	5.10356	2.32624	3.7149
4933406C10Rik (ncRNA)	NR_044986	4.61713	1.82199	3.21956	4.61713	1.82199	3.21956
4933406M09Rik	NM_173771	3.92289	4.75058	4.33674	3.92289	4.75058	4.33674
4933407G14Rik (ncRNA)	NR_045841	1.20895	1.56234	1.38565	1.20895	1.56234	1.38565
4933407K13Rik (ncRNA)	NR_029443	2.81107	2.88557	2.84832	2.81107	2.88557	2.84832
4933408J17Rik (ncRNA)	NR_045810	1.08102	2.07698	1.579	1.08102	2.07698	1.579
4933408N05Rik (ncRNA)	NR_045831	6.31308	9.43726	7.87517	6.31308	9.43726	7.87517
4933409K07Rik (ncRNA)	NR_033123	17.3518	22.9464	20.1491	17.3518	22.9464	20.1491
4933409K07Rik (ncRNA)	NR_033123	17.3518	22.9464	20.1491	17.3518	22.9464	20.1491
4933409K07Rik (ncRNA)	NR_033123	17.3518	22.9464	20.1491	17.3518	22.9464	20.1491
4933409K07Rik (ncRNA)	NR_033123	17.3518	22.9464	20.1491	17.3518	22.9464	20.1491
4933412E12Rik (ncRNA)	NR_038025	17.052	16.743	16.8975	21.8194	27.4626	24.641
4933412E12Rik (ncRNA)	NR_038026	4.76739	10.7197	7.74352	21.8194	27.4626	24.641
4933412E24Rik	NM_027668	1.7012	3.01035	2.35577	1.7012	3.01035	2.35577
4933413L06Rik (ncRNA)	NR_045508	9.4972	5.29735	7.39728	9.4972	5.29735	7.39728
4933416C03Rik	NM_001161855	15.2084	14.8972	15.0528	15.2084	14.8972	15.0528
4933416M07Rik (ncRNA)	NR_045840	7.91224	7.23653	7.57439	7.91224	7.23653	7.57439
4933417D19Rik (ncRNA)	NR_045849	1.29761	1.26235	1.27998	1.29761	1.26235	1.27998
4933417G07Rik (ncRNA)	NR_033592	0.791744	1.30262	1.04718	0.791744	1.30262	1.04718
4933421O10Rik (ncRNA)	NR_036602	6.37145	7.52789	6.94967	6.37145	7.52789	6.94967
4933425L06Rik	NM_025751	13.6458	18.3448	15.9953	13.6458	18.3448	15.9953
4933427D06Rik (ncRNA)	NR_134977	15.2515	33.8032	24.5274	33.9793	33.8032	33.8913
4933427D06Rik (ncRNA)	NR_134978	18.7278	5.03241e-06	9.36389	33.9793	33.8032	33.8913
4933427D06Rik (ncRNA)	NR_134979	0	0	0	33.9793	33.8032	33.8913
4933427D14Rik	NM_001361564	0	0	0	1.94387	2.31085	2.12736
4933427D14Rik	NM_028963	1.94387	2.31085	2.12736	1.94387	2.31085	2.12736
4933427D14Rik (ncRNA)	NR_155065	9.38795	10.7864	10.0872	10.9818	14.7734	12.8776
4933427D14Rik (ncRNA)	NR_155066	0.0207427	0.0717899	0.0462663	10.9818	14.7734	12.8776
4933427D14Rik (ncRNA)	NR_155067	1.57315	3.91513	2.74414	10.9818	14.7734	12.8776
4933427E11Rik (ncRNA)	NR_033197	1.24058	1.01981	1.13019	1.24058	1.01981	1.13019
4933428M09Rik	NM_001357856	2.90049	3.0163	2.95839	2.90049	3.0163	2.95839
4933430H16Rik (ncRNA)	NR_045855	3.90242	4.8519	4.37716	3.90242	4.8519	4.37716
4933430I17Rik	NM_001356420	0	0	0	4.19182	3.57662	3.88422
4933430I17Rik	NM_001356421	4.19182	3.57662	3.88422	4.19182	3.57662	3.88422
4933430I17Rik	NM_001356422	0	0	0	4.19182	3.57662	3.88422
4933430I17Rik	NM_177607	0	0	0	4.19182	3.57662	3.88422
4933430M04Rik (ncRNA)	NR_045857	0.78899	2.68378	1.73639	0.78899	2.68378	1.73639
4933431E20Rik (ncRNA)	NR_015459	12.5432	14.1615	13.3524	12.5432	14.1615	13.3524
4933431G14Rik (ncRNA)	NR_045163	0	0.83907	0.419535	2.31408	2.9042	2.60914
4933431G14Rik (ncRNA)	NR_045165	2.31408	2.06513	2.1896	2.31408	2.9042	2.60914
4933432K03Rik (ncRNA)	NR_102286	2.69427	1.48747	2.09087	2.69427	1.48747	2.09087
4933433G15Rik (ncRNA)	NR_040719	5.37571	7.50082	6.43827	5.37571	7.50082	6.43827
4933434E20Rik	NM_001287086	0	0	0	112.241	146.253	129.247
4933434E20Rik	NM_001287087	51.6054	60.0565	55.831	112.241	146.253	129.247
4933434E20Rik	NM_025762	0	0	0	112.241	146.253	129.247
4933434E20Rik	NM_027500	60.6353	86.1968	73.4161	112.241	146.253	129.247
4933438K21Rik (ncRNA)	NR_045446	9.78475	11.7955	10.7901	9.78475	11.7955	10.7901
4933439C10Rik (ncRNA)	NR_015585	1.28652	1.93763	1.61207	1.76238	2.96377	2.36307
4933439C10Rik (ncRNA)	NR_135273	0.475858	1.02614	0.750999	1.76238	2.96377	2.36307
4933440J02Rik (ncRNA)	NR_045344	1.47363	3.06254	2.26808	1.47363	3.06254	2.26808
5031410I06Rik	NM_207657	29.86	30.4926	30.1763	29.86	30.4926	30.1763
5031425E22Rik (ncRNA)	NR_040469	8.83094	10.8053	9.81811	8.83094	10.8053	9.81811
5031426D15Rik (ncRNA)	NR_027890	2.56198	4.33774	3.44986	2.56198	4.33774	3.44986
5031434C07Rik (ncRNA)	NR_045986	1.60766	0.000131122	0.803898	1.60766	1.06664	1.33715
5031434C07Rik (ncRNA)	NR_045987	0	1.06651	0.533255	1.60766	1.06664	1.33715
5031434O11Rik (ncRNA)	NR_033624	3.46223	4.77815	4.12019	3.46223	4.77815	4.12019
5031439G07Rik	NM_001033273	14.9995	13.8584	14.429	14.9995	13.8584	14.429
5033403F01Rik (ncRNA)	NR_131019	2.6877	2.24712	2.46741	2.6877	2.24712	2.46741
5033406O09Rik (ncRNA)	NR_029464	1.02752	2.01722	1.52237	1.02752	2.01722	1.52237
5330417C22Rik	NM_001033304	2.19439	0	1.0972	2.2438	2.47494	2.35937
5330417C22Rik	NM_001346518	0	2.44534	1.22267	2.2438	2.47494	2.35937
5330417C22Rik	NM_001358063	0	0.0295963	0.0147982	2.2438	2.47494	2.35937
5330417C22Rik	NM_001358064	0	0	0	2.2438	2.47494	2.35937
5330417C22Rik	NM_001358065	0.0494088	0	0.0247044	2.2438	2.47494	2.35937
5430402O13Rik (ncRNA)	NR_015581	3.74988	2.9023	3.32609	9.7522	6.3345	8.04335
5430402O13Rik (ncRNA)	NR_027892	6.00232	3.4322	4.71726	9.7522	6.3345	8.04335
5430405H02Rik (ncRNA)	NR_015591	13.6161	23.056	18.3361	18.3295	23.0609	20.6952
5430405H02Rik (ncRNA)	NR_027914	4.7134	0.00488666	2.35915	18.3295	23.0609	20.6952
5430416N02Rik (ncRNA)	NR_034038	45.5336	45.2791	45.4064	45.5336	45.2791	45.4064
5430421F17Rik (ncRNA)	NR_040352	3.23306	3.48949	3.36127	3.23306	3.48949	3.36127
5430427M07Rik (ncRNA)	NR_045858	1.30706	2.85416	2.08061	1.30706	2.85416	2.08061
5430428K19Rik (ncRNA)	NR_045426	1.41919	3.23369	2.32644	1.41919	3.23369	2.32644
5430437J10Rik (ncRNA)	NR_045274	4.62769	3.25086	3.93928	4.62769	3.25086	3.93928
5530601H04Rik (ncRNA)	NR_015467	10.3903	8.7792	9.58476	10.3903	8.7792	9.58476
5730403I07Rik (ncRNA)	NR_040378	2.76789	3.0489	2.9084	2.76789	3.0489	2.9084
5730405O15Rik (ncRNA)	NR_038158	1.55687	0.862059	1.20946	1.55687	0.862059	1.20946
5730408K05Rik (ncRNA)	NR_027866	6.92176	16.7753	11.8485	6.92176	16.7753	11.8485
5730409E04Rik	NM_001013755	7.63216	5.61126	6.62171	7.63218	5.61167	6.62192
5730409E04Rik	NM_001145950	1.78588e-05	0.000414731	0.000216295	7.63218	5.61167	6.62192
5730422E09Rik (ncRNA)	NR_015478	2.38534	2.47215	2.42875	2.38534	2.47215	2.42875
5730455P16Rik	NM_027472	9.36255	13.1611	11.2618	9.36255	13.1611	11.2618
5730480H06Rik (ncRNA)	NR_045500	2.92507	5.55298	4.23903	2.92507	5.55298	4.23903
5730507C01Rik	NM_001033157	47.3182	49.1651	48.2417	47.3182	49.1651	48.2417
5730507C01Rik	NM_001201330	0	0	0	47.3182	49.1651	48.2417
5830416I19Rik (ncRNA)	NR_045384	9.11598	7.29998	8.20798	9.11598	7.29998	8.20798
5830417I10Rik (ncRNA)	NR_028359	29.5006	31.9049	30.7027	29.5006	31.9049	30.7027
5830444B04Rik (ncRNA)	NR_102283	1.95699	1.851	1.90399	1.95699	2.98491	2.47095
5830444B04Rik (ncRNA)	NR_102284	0	1.13391	0.566954	1.95699	2.98491	2.47095
5830444B04Rik (ncRNA)	NR_102287	0	0	0	1.95699	2.98491	2.47095
5830454E08Rik (ncRNA)	NR_073359	1.78422	3.6577	2.72096	1.78422	3.6577	2.72096
5830473C10Rik	NM_001252661	0.564129	1.60981	1.08697	0.564129	1.60981	1.08697
5930403L14Rik (ncRNA)	NR_045643	5.26313	6.08128	5.6722	5.26313	6.08128	5.6722
5930412G12Rik (ncRNA)	NR_015517	1.76403	2.02276	1.89339	1.76403	2.02276	1.89339
5930430L01Rik (ncRNA)	NR_102383	3.68022	3.11575	3.39798	8.25816	13.5045	10.8813
5930430L01Rik (ncRNA)	NR_102384	4.57794	10.3888	7.48335	8.25816	13.5045	10.8813
6030408B16Rik (ncRNA)	NR_033803	4.64204	7.57507	6.10856	4.64204	7.57507	6.10856
6030440G07Rik (ncRNA)	NR_036598	15.9362	11.2611	13.5986	15.9362	11.2611	13.5986
6030443J06Rik (ncRNA)	NR_102315	5.73855	8.60027	7.16941	5.73855	8.60027	7.16941
6030458C11Rik	NM_001166360	8.87719	11.6854	10.2813	45.8423	47.3294	46.5859
6030458C11Rik	NM_001357761	25.7279	1.74436	13.7361	45.8423	47.3294	46.5859
6030458C11Rik	NM_029998	11.2373	33.8996	22.5684	45.8423	47.3294	46.5859
6230400D17Rik (ncRNA)	NR_029446	8.23317	4.74765	6.49041	8.23317	4.74765	6.49041
6330403K07Rik	NM_134022	6.97437	4.06782	5.52109	6.97437	4.06782	5.52109
6330409D20Rik	NM_027529	1.72227	0.539843	1.13106	1.72227	0.539843	1.13106
6330415B21Rik (ncRNA)	NR_045141	2.13912	1.5007	1.81991	2.13912	1.5007	1.81991
6330415G19Rik (ncRNA)	NR_126484	5.72848	4.73679	5.23263	6.84554	4.73679	5.79116
6330415G19Rik (ncRNA)	NR_126485	1.11706	0	0.558532	6.84554	4.73679	5.79116
6330418K02Rik (ncRNA)	NR_045821	5.11302	2.10895	3.61099	5.11302	2.10895	3.61099
6330549D23Rik (ncRNA)	NR_003619	5.59973	6.14643	5.87308	5.59973	6.14643	5.87308
6430548M08Rik	NM_001163760	0	0	0	4.53848	4.24709	4.39279
6430548M08Rik	NM_001163761	2.80196	4.24694	3.52445	4.53848	4.24709	4.39279
6430548M08Rik	NM_001163762	1.73652	0.000149219	0.868336	4.53848	4.24709	4.39279
6430548M08Rik	NM_172286	0	0	0	4.53848	4.24709	4.39279
6430550D23Rik	NM_001145351	2.46698	2.58553	2.52625	2.46698	2.58553	2.52625
6430550D23Rik	NM_001145352	0	0	0	2.46698	2.58553	2.52625
6430553K19Rik (ncRNA)	NR_152166	0.533964	1.78811	1.16104	0.533964	1.78811	1.16104
6430562O15Rik (ncRNA)	NR_015515	1.4784	3.45379	2.4661	1.4784	3.45379	2.4661
6430571L13Rik	NM_175486	2.80389	2.76058	2.78223	2.80389	2.76058	2.78223
6430706D22Rik (ncRNA)	NR_040291	97.5568	92.6509	95.1038	97.5568	92.6509	95.1038
6430710C18Rik (ncRNA)	NR_102348	7.23512	8.30151	7.76832	8.61962	12.2428	10.4312
6430710C18Rik (ncRNA)	NR_102349	1.38449	3.94132	2.66291	8.61962	12.2428	10.4312
6530403H02Rik (ncRNA)	NR_130170	25.7423	28.2498	26.9961	25.7423	28.2498	26.9961
6720468P15Rik (ncRNA)	NR_040306	2.39893	1.3062	1.85256	5.40337	4.18943	4.7964
6720468P15Rik (ncRNA)	NR_040307	3.00445	2.88323	2.94384	5.40337	4.18943	4.7964
6720489N17Rik	NM_001324406	6.03459	5.77659	5.90559	6.03459	5.77659	5.90559
6720489N17Rik	NM_173381	0	0	0	6.03459	5.77659	5.90559
6820431F20Rik (ncRNA)	NR_030708	46.1351	50.6161	48.3756	46.1351	50.6161	48.3756
7530416G11Rik	NM_001256072	1.68036	3.19667	2.43852	1.68036	3.19667	2.43852
8030423F21Rik (ncRNA)	NR_045738	2.56271	2.64217	2.60244	2.56271	2.64217	2.60244
8030455M16Rik (ncRNA)	NR_131069	7.07663	6.4657	6.77116	7.07663	6.4657	6.77116
8030462N17Rik	NM_178670	14.5525	12.785	13.6687	14.5525	12.785	13.6687
8030474K03Rik	NM_001359671	103.693	96.6255	100.159	103.693	96.6255	100.159
8430429K09Rik (ncRNA)	NR_028317	0	2.89126	1.44563	9.47836	13.6586	11.5685
8430429K09Rik (ncRNA)	NR_045275	1.39427	6.01721	3.70574	9.47836	13.6586	11.5685
8430429K09Rik (ncRNA)	NR_045276	8.08409	4.75017	6.41713	9.47836	13.6586	11.5685
8430430B14Rik (ncRNA)	NR_130994	2.36546	0	1.18273	2.36546	0	1.18273
9030025P20Rik	NM_001123370	11.303	19.2415	15.2723	11.303	19.2415	15.2723
9030612E09Rik (ncRNA)	NR_102361	2.18509	1.98763	2.08636	2.18509	1.98763	2.08636
9030624G23Rik	NM_001256489	8.79637	18.8276	13.812	8.79637	18.8276	13.812
9030625G05Rik (ncRNA)	NR_110446	0.897628	1.48504	1.19133	0.897628	1.48504	1.19133
9130008F23Rik	NM_027834	0.835537	1.37427	1.1049	0.835537	1.37427	1.1049
9130019O22Rik	NM_030226	2.18738	2.70556	2.44647	2.18738	2.70556	2.44647
9130019P16Rik (ncRNA)	NR_033635	1.20318	0.921396	1.06229	1.20318	0.921396	1.06229
9130023H24Rik	NM_177001	4.98352	3.48736	4.23544	4.98352	3.48736	4.23544
9130024F11Rik (ncRNA)	NR_024325	2.21404	1.816	2.01502	2.21404	1.816	2.01502
9130024F11Rik (ncRNA)	NR_024326	0	0	0	2.21404	1.816	2.01502
9130209A04Rik (ncRNA)	NR_033453	0.947295	4.11876	2.53303	0.947295	4.11876	2.53303
9130221F21Rik (ncRNA)	NR_046180	3.53106	5.81442	4.67274	3.53106	5.81442	4.67274
9130221H12Rik (ncRNA)	NR_046001	9.09056	12.1787	10.6346	9.09056	12.1787	10.6346
9130401M01Rik	NM_029418	146.049	157.336	151.692	146.049	157.336	151.692
9230019H11Rik	NM_001033977	1.1992	1.23546	1.21733	1.1992	1.23546	1.21733
9230105E05Rik (ncRNA)	NR_040626	1.92512	2.80932	2.36722	1.92512	2.80932	2.36722
9230112J17Rik (ncRNA)	NR_040463	0	0	0	1.58939	0.725539	1.15747
9230112J17Rik (ncRNA)	NR_040464	1.58939	0.725539	1.15747	1.58939	0.725539	1.15747
9230114K14Rik (ncRNA)	NR_015537	6.41622	6.94616	6.68119	6.41622	6.94616	6.68119
9230116L04Rik (ncRNA)	NR_110486	1.85057	2.1658	2.00818	1.85057	2.1658	2.00818
9230116N13Rik (ncRNA)	NR_024328	2.86761	4.3891	3.62836	2.86761	4.3891	3.62836
9230117E06Rik (ncRNA)	NR_130988	3.3718	2.69301	3.0324	3.3718	2.69301	3.0324
9330020H09Rik (ncRNA)	NR_028442	4.57558	5.45174	5.01366	4.57558	5.45174	5.01366
9330102E08Rik (ncRNA)	NR_077223	15.4517	14.8042	15.128	15.4517	14.8042	15.128
9330104G04Rik (ncRNA)	NR_152128	3.81995	5.19649	4.50822	3.81995	5.19649	4.50822
9330133O14Rik (ncRNA)	NR_045696	3.02745	2.69449	2.86097	3.02745	2.69449	2.86097
9330136K24Rik (ncRNA)	NR_131123	13.7323	15.2918	14.512	13.7323	15.2918	14.512
9330151L19Rik (ncRNA)	NR_033222	3.92231	4.1343	4.0283	3.92231	4.1343	4.0283
9330158H04Rik (ncRNA)	NR_015589	6.3114	9.23236	7.77188	6.3114	9.23236	7.77188
9330159F19Rik	NM_001162537	2.04236	2.67054	2.35645	2.04236	2.67054	2.35645
9330159M07Rik (ncRNA)	NR_037982	0	10.2126	5.10628	13.6098	19.1752	16.3925
9330159M07Rik (ncRNA)	NR_037983	13.6098	8.96266	11.2863	13.6098	19.1752	16.3925
9330175M20Rik (ncRNA)	NR_045151	1.17416	3.45961	2.31689	1.17416	3.45961	2.31689
9330179D12Rik (ncRNA)	NR_040273	2.47975	0	1.23988	3.3245	1.86249	2.5935
9330179D12Rik (ncRNA)	NR_040274	0.844753	1.86249	1.35362	3.3245	1.86249	2.5935
9330179D12Rik (ncRNA)	NR_040275	0	0	0	3.3245	1.86249	2.5935
9330182L06Rik	NM_001359884	0	0.0327619	0.016381	9.89025	10.463	10.1766
9330182L06Rik	NM_001359885	0.796701	1.6496	1.22315	9.89025	10.463	10.1766
9330182L06Rik	NM_001359886	7.68718	6.17218	6.92968	9.89025	10.463	10.1766
9330182L06Rik	NM_001359887	1.40637	2.48645	1.94641	9.89025	10.463	10.1766
9330182L06Rik	NM_172706	1.40514e-08	0.121991	0.0609955	9.89025	10.463	10.1766
9430015G10Rik	NM_145557	22.4251	0.0106426	11.2179	25.9496	25.3564	25.653
9430015G10Rik	NM_177205	3.52456	25.3457	14.4352	25.9496	25.3564	25.653
9430018G01Rik (ncRNA)	NR_045988	8.20717	12.3728	10.29	8.20717	12.3728	10.29
9430019J16Rik (ncRNA)	NR_040635	1.39092	2.41276	1.90184	1.39092	2.41276	1.90184
9430021M05Rik (ncRNA)	NR_033569	2.71246	1.73425	2.22335	2.71246	1.73425	2.22335
9430037G07Rik (ncRNA)	NR_040766	15.7723	16.6786	16.2255	15.7723	16.6786	16.2255
9430038I01Rik	NM_029886	17.6228	22.3759	19.9994	17.6228	22.3759	19.9994
9430060I03Rik (ncRNA)	NR_015525	2.24175	2.76752	2.50463	2.24175	2.76752	2.50463
9430065F17Rik (ncRNA)	NR_131098	1.26603	5.78418	3.5251	5.06454	9.81804	7.44129
9430065F17Rik (ncRNA)	NR_131099	3.79851	4.03386	3.91619	5.06454	9.81804	7.44129
9430065F17Rik (ncRNA)	NR_131100	0	0	0	5.06454	9.81804	7.44129
9430083A17Rik (ncRNA)	NR_029463	1.95685	3.22928	2.59306	1.95685	3.22928	2.59306
9430091E24Rik (ncRNA)	NR_040363	1.52898	0	0.764492	6.79297	15.1098	10.9514
9430091E24Rik (ncRNA)	NR_040364	5.26399	15.1098	10.1869	6.79297	15.1098	10.9514
9530020I12Rik (ncRNA)	NR_131083	0.284313	0.476321	0.380317	13.1675	11.8869	12.5272
9530020I12Rik (ncRNA)	NR_131084	0	0	0	13.1675	11.8869	12.5272
9530020I12Rik (ncRNA)	NR_131085	12.8832	11.4106	12.1469	13.1675	11.8869	12.5272
9530026P05Rik (ncRNA)	NR_015530	1.47101	4.83356	3.15228	1.47101	4.83356	3.15228
9530027J09Rik (ncRNA)	NR_045916	2.91368	4.4546	3.68414	2.91368	4.4546	3.68414
9530052E02Rik (ncRNA)	NR_046017	2.45317	3.3353	2.89423	2.45317	3.3353	2.89423
9530062K07Rik (ncRNA)	NR_131013	7.13251	10.9711	9.05178	7.13251	10.9711	9.05178
9530068E07Rik	NM_153117	48.0544	50.9104	49.4824	48.0544	50.9104	49.4824
9530077C05Rik	NM_026739	40.0219	33.6123	36.8171	40.0219	33.6123	36.8171
9530077C05Rik (ncRNA)	NR_152381	1.62773	2.7658	2.19676	1.62773	2.7658	2.19676
9530077C05Rik (ncRNA)	NR_152382	0	0	0	1.62773	2.7658	2.19676
9530080O11Rik (ncRNA)	NR_045776	4.02322	7.25589	5.63955	4.02322	7.25589	5.63955
9530080O11Rik (ncRNA)	NR_045777	0	0	0	4.02322	7.25589	5.63955
9530082P21Rik (ncRNA)	NR_015472	2.70457	2.15981	2.43219	2.70457	2.15981	2.43219
9530091C08Rik (ncRNA)	NR_033299	3.05757	4.07499	3.56628	3.05757	4.07499	3.56628
9630001P10Rik (ncRNA)	NR_102378	0.754423	2.34011	1.54727	0.754423	2.34011	1.54727
9630028B13Rik (ncRNA)	NR_038006	3.42319	2.99554	3.20937	3.42319	2.99554	3.20937
9830107B12Rik	NM_001177896	0	0	0	1.1214	1.24193	1.18166
9830107B12Rik	NM_001177897	1.12098	1.24075	1.18086	1.1214	1.24193	1.18166
9830107B12Rik	NM_177824	0.000419215	0.00118416	0.000801686	1.1214	1.24193	1.18166
9830132P13Rik (ncRNA)	NR_040552	1.65037	1.39575	1.52306	1.65037	1.39575	1.52306
9830166K06Rik (ncRNA)	NR_045314	1.4295	0.886979	1.15824	1.4295	0.886979	1.15824
9930021J03Rik	NM_172836	33.2342	33.6884	33.4613	33.2342	33.6884	33.4613
9930104L06Rik	NM_001355603	0	0.361481	0.180741	10.8368	8.9517	9.89425
9930104L06Rik	NM_001355605	3.58496e-09	3.66737	1.83368	10.8368	8.9517	9.89425
9930104L06Rik	NM_177573	10.8368	4.92285	7.87983	10.8368	8.9517	9.89425
9930111H07Rik (ncRNA)	NR_108086	2.43745	3.16589	2.80167	2.43745	3.16589	2.80167
9930111J21Rik1	NM_001114679	1.51872	3.71517	2.61694	1.51872	3.71517	2.61694
A030001D20Rik (ncRNA)	NR_152217	8.39241	9.72991	9.06116	8.39241	9.72991	9.06116
A130010J15Rik	NM_001160359	2.7445	2.16837	2.45643	8.52235	9.52563	9.02399
A130010J15Rik	NM_001160360	5.75714	7.34035	6.54874	8.52235	9.52563	9.02399
A130010J15Rik	NM_181048	0.0207127	0.0169145	0.0188136	8.52235	9.52563	9.02399
A130077B15Rik (ncRNA)	NR_040616	397.687	475.7	436.694	397.687	475.7	436.694
A230050P20Rik	NM_175687	8.18442	11.0437	9.61406	8.18442	11.0437	9.61406
A230051N06Rik (ncRNA)	NR_155493	1.3384	1.10186	1.22013	1.3384	1.10186	1.22013
A230056P14Rik (ncRNA)	NR_015495	5.90811	2.62442	4.26626	5.90811	2.62442	4.26626
A230070E04Rik (ncRNA)	NR_045897	2.48409	1.93488	2.20949	2.48409	1.93488	2.20949
A230072C01Rik (ncRNA)	NR_027445	7.02274	8.67546	7.8491	11.7982	10.3309	11.0645
A230072C01Rik (ncRNA)	NR_027446	4.77548	1.65541	3.21544	11.7982	10.3309	11.0645
A230072E10Rik (ncRNA)	NR_015600	3.97256	3.81262	3.89259	3.97256	3.81262	3.89259
A230077H06Rik (ncRNA)	NR_040329	3.74121	4.71135	4.22628	3.74121	4.71135	4.22628
A230103J11Rik (ncRNA)	NR_110581	5.75359	4.92542	5.33951	5.75359	4.92542	5.33951
A230103J11Rik (ncRNA)	NR_110582	0	0	0	5.75359	4.92542	5.33951
A2m	NM_175628	1.2615	1.64653	1.45402	1.2615	1.64653	1.45402
A2ml1	NM_001001179	3.21566	3.32758	3.27162	3.21566	3.32758	3.27162
A330023F24Rik (ncRNA)	NR_015566	0.777115	2.18015	1.47863	0.777115	2.18015	1.47863
A330032B11Rik (ncRNA)	NR_045329	23.5986	31.5812	27.5899	23.5986	31.5812	27.5899
A330033J07Rik (ncRNA)	NR_102303	1.3494	1.40222	1.37581	1.3494	1.40222	1.37581
A330035P11Rik (ncRNA)	NR_015586	4.00556	2.32613	3.16584	4.00556	2.32613	3.16584
A330041J22Rik (ncRNA)	NR_045835	1.4547	1.05822	1.25646	1.4547	1.05822	1.25646
A330049N07Rik (ncRNA)	NR_040646	6.88961	5.48533	6.18747	6.88961	5.48533	6.18747
A330069E16Rik (ncRNA)	NR_015464	116.059	162.579	139.319	116.059	162.579	139.319
A330076C08Rik (ncRNA)	NR_045088	0.761871	1.28277	1.02232	0.761871	1.28277	1.02232
A330076H08Rik (ncRNA)	NR_015599	1.65938	1.67405	1.66671	1.65938	1.67405	1.66671
A330094K24Rik (ncRNA)	NR_155289	1.09693	1.36098	1.22895	1.09693	1.36098	1.22895
A330102I10Rik (ncRNA)	NR_045073	0	0	0	6.22762	5.29768	5.76265
A330102I10Rik (ncRNA)	NR_045074	0.635062	0	0.317531	6.22762	5.29768	5.76265
A330102I10Rik (ncRNA)	NR_045075	5.59255	5.29768	5.44512	6.22762	5.29768	5.76265
A330102I10Rik (ncRNA)	NR_045077	0	0	0	6.22762	5.29768	5.76265
A430005L14Rik	NM_001163019	25.8352	4.04532	14.9402	51.2665	53.3572	52.3119
A430005L14Rik	NM_175287	25.4313	49.3119	37.3716	51.2665	53.3572	52.3119
A430033K04Rik	NM_183025	5.81358	7.89155	6.85257	5.81358	7.89155	6.85257
A430035B10Rik (ncRNA)	NR_040452	3.08517	1.34498	2.21507	3.08517	1.34498	2.21507
A430046D13Rik (ncRNA)	NR_131150	6.72632	9.47545	8.10088	8.40925	9.4838	8.94652
A430046D13Rik (ncRNA)	NR_131151	1.68293	0.00835425	0.84564	8.40925	9.4838	8.94652
A430078G23Rik	NM_001033378	2.58281	1.69191	2.13736	2.58281	1.69191	2.13736
A430078I02Rik (ncRNA)	NR_131125	2.10867	1.64538	1.87702	3.74577	1.73477	2.74027
A430078I02Rik (ncRNA)	NR_131126	1.63711	0.0893835	0.863246	3.74577	1.73477	2.74027
A430085M09Rik (ncRNA)	NR_131142	3.87931	6.01599	4.94765	3.87931	6.01599	4.94765
A430090L17Rik (ncRNA)	NR_045836	1.28247	0.836659	1.05956	1.28247	0.836659	1.05956
A4galt	NM_001004150	1.49837	0	0.749186	1.49837	3.50804	2.5032
A4galt	NM_001170954	0	3.50804	1.75402	1.49837	3.50804	2.5032
A530050N04Rik (ncRNA)	NR_045419	2.15419	2.59728	2.37574	2.15419	2.59728	2.37574
A530064D06Rik	NM_001113556	0.0349392	0	0.0174696	4.62599	4.89807	4.76203
A530064D06Rik	NM_178796	4.59106	4.89807	4.74456	4.62599	4.89807	4.76203
A530072M11Rik (ncRNA)	NR_045765	2.27893	3.47954	2.87923	2.27893	3.47954	2.87923
A630023A22Rik	NM_001251843	2.5264	0.627402	1.5769	2.5264	0.627402	1.5769
A630066F11Rik (ncRNA)	NR_030698	3.01698	2.49814	2.75756	3.01698	2.49814	2.75756
A630072M18Rik (ncRNA)	NR_030699	9.8192	8.76997	9.29459	9.8192	8.76997	9.29459
A630075F10Rik (ncRNA)	NR_033632	0	0	0	10.7969	14.8218	12.8094
A630075F10Rik (ncRNA)	NR_033634	10.7969	14.8218	12.8094	10.7969	14.8218	12.8094
A630089N07Rik (ncRNA)	NR_015491	111.085	140.892	125.989	111.085	140.892	125.989
A730008H23Rik	NM_172505	33.3362	28.5065	30.9214	33.3362	28.5065	30.9214
A730017C20Rik	NM_001167925	0	3.38331	1.69165	1.11363	3.38331	2.24847
A730017C20Rik	NM_173759	1.11363	0	0.556814	1.11363	3.38331	2.24847
A730017C20Rik (ncRNA)	NR_033764	1.4279e-07	0	7.13951e-08	2.87895	0	1.43948
A730017C20Rik (ncRNA)	NR_033765	2.87895	0	1.43948	2.87895	0	1.43948
A730017L22Rik (ncRNA)	NR_015523	57.4167	65.8008	61.6088	57.4167	65.8008	61.6088
A730020E08Rik (ncRNA)	NR_040287	5.09613	8.47139	6.78376	5.09613	8.47139	6.78376
A730063M14Rik (ncRNA)	NR_040660	10.9759	0	5.48797	10.9759	0	5.48797
A730081D07Rik (ncRNA)	NR_155347	6.42064	4.52238	5.47151	6.42064	4.52238	5.47151
A730082K24Rik (ncRNA)	NR_040317	0.524451	1.82678	1.17561	2.1827	2.96538	2.57404
A730082K24Rik (ncRNA)	NR_040319	1.65825	1.13861	1.39843	2.1827	2.96538	2.57404
A730085K08Rik (ncRNA)	NR_045967	1.24043	1.9756	1.60802	1.24043	1.9756	1.60802
A730098A19Rik (ncRNA)	NR_155422	0	2.04377	1.02189	0	2.04377	1.02189
A830010M20Rik	NM_001007574	6.2214	7.86511	7.04325	6.2214	7.86511	7.04325
A830010M20Rik	NM_001168557	0	0	0	6.2214	7.86511	7.04325
A830011K09Rik (ncRNA)	NR_126072	0	0	0	2.09944	3.29009	2.69477
A830011K09Rik (ncRNA)	NR_126073	2.09944	3.29009	2.69477	2.09944	3.29009	2.69477
A830018L16Rik	NM_001160369	0	0	0	1.64295	2.98037	2.31166
A830018L16Rik	NM_001160370	0	0	0	1.64295	2.98037	2.31166
A830018L16Rik	NM_001160371	1.64295	2.98037	2.31166	1.64295	2.98037	2.31166
A830018L16Rik	NM_001310451	0	0	0	1.64295	2.98037	2.31166
A830018L16Rik	NM_177173	0	0	0	1.64295	2.98037	2.31166
A830035O19Rik (ncRNA)	NR_152206	6.37249	4.25162	5.31206	6.37249	4.25162	5.31206
A830052D11Rik (ncRNA)	NR_045403	4.86302	2.2565	3.55976	4.86302	2.2565	3.55976
A830082K12Rik (ncRNA)	NR_045195	2.17317	2.13766	2.15541	2.17317	2.13766	2.15541
A830082N09Rik (ncRNA)	NR_015526	2.7599	3.12476	2.94233	2.7599	3.12476	2.94233
A930005H10Rik (ncRNA)	NR_015487	0.29946	1.25948	0.779468	4.92671	2.40719	3.66695
A930005H10Rik (ncRNA)	NR_027894	3.49879	1.14771	2.32325	4.92671	2.40719	3.66695
A930005H10Rik (ncRNA)	NR_027895	1.12845	0	0.564227	4.92671	2.40719	3.66695
A930006K02Rik (ncRNA)	NR_077219	5.55331	8.33702	6.94517	5.55331	8.33702	6.94517
A930007A09Rik	NM_001357954	1.78436	2.0644	1.92438	1.78436	2.0644	1.92438
A930007I19Rik (ncRNA)	NR_015567	1.27146	0.935243	1.10335	1.27146	0.935243	1.10335
A930011G23Rik (ncRNA)	NR_030692	3.28468	2.89219	3.08844	3.28468	2.89219	3.08844
A930012L18Rik (ncRNA)	NR_026853	1.07949	2.47624	1.77786	1.07949	2.47624	1.77786
A930013F10Rik (ncRNA)	NR_027886	6.41493	6.98536	6.70015	6.41493	6.98536	6.70015
A930016O22Rik (ncRNA)	NR_073014	0	0	0	5.66734	5.27859	5.47296
A930016O22Rik (ncRNA)	NR_073015	5.66734	5.27859	5.47296	5.66734	5.27859	5.47296
A930017K11Rik	NM_001358019	1.29941	1.20148	1.25045	1.29941	1.20148	1.25045
A930019D19Rik (ncRNA)	NR_040619	1.67464	0.706548	1.19059	1.67464	0.706548	1.19059
A930024E05Rik (ncRNA)	NR_045820	2.46747	3.0258	2.74664	2.46747	3.0258	2.74664
A930037H05Rik (ncRNA)	NR_153849	8.16328	9.67276	8.91802	8.16328	9.67276	8.91802
A930041C12Rik (ncRNA)	NR_046195	18.2807	20.1787	19.2297	18.2807	20.1787	19.2297
AA388235 (ncRNA)	NR_033305	0.986463	1.07574	1.0311	0.986463	1.07574	1.0311
AA414768	NM_001272033	2.81662	6.21962	4.51812	2.81662	6.21962	4.51812
AA465934 (ncRNA)	NR_028363	6.7594	7.08481	6.92211	6.7594	7.08481	6.92211
AA467197	NM_001004174	5.22883	11.0182	8.12352	5.22883	11.0182	8.12352
AA536875 (ncRNA)	NR_045143	0	0	0	1.18108	2.0676	1.62434
AA536875 (ncRNA)	NR_045144	1.18108	2.0676	1.62434	1.18108	2.0676	1.62434
AA536875 (ncRNA)	NR_045145	0	0	0	1.18108	2.0676	1.62434
AA543186 (ncRNA)	NR_027448	2.90843	0.405262	1.65685	2.90843	0.405262	1.65685
AA792892	NM_178894	1.83154	1.62655	1.72905	1.83154	1.62655	1.72905
Aaas	NM_153416	84.4609	82.1375	83.2992	84.4609	82.1375	83.2992
Aacs	NM_030210	20.6947	25.9891	23.3419	20.6947	25.9891	23.3419
Aaed1	NM_025370	90.9205	120.234	105.577	90.9205	120.234	105.577
Aagab	NM_001357323	0.000341985	0.534499	0.267421	22.1384	24.8203	23.4794
Aagab	NM_025857	22.1381	24.2858	23.2119	22.1384	24.8203	23.4794
Aak1	NM_001040106	4.16566	2.55913	3.3624	8.37394	9.02844	8.70119
Aak1	NM_177762	4.20828	6.46931	5.33879	8.37394	9.02844	8.70119
Aamdc	NM_001177945	20.7163	16.4764	18.5964	32.6781	36.1913	34.4347
Aamdc	NM_001177946	0	12.0443	6.02215	32.6781	36.1913	34.4347
Aamdc	NM_001177947	11.9618	0	5.9809	32.6781	36.1913	34.4347
Aamdc	NM_183251	0	7.6706	3.8353	32.6781	36.1913	34.4347
Aamp	NM_001190444	0.132008	1.75179	0.941899	207.998	198.492	203.245
Aamp	NM_146110	207.866	196.74	202.303	207.998	198.492	203.245
Aar2	NM_001164818	10.2152	10.4977	10.3565	23.2166	21.4079	22.3123
Aar2	NM_026661	13.0014	10.9102	11.9558	23.2166	21.4079	22.3123
Aard	NM_175503	18.8038	19.9008	19.3523	18.8038	19.9008	19.3523
Aars	NM_146217	73.7711	68.6607	71.2159	73.7711	68.6607	71.2159
Aars2	NM_001358000	3.13656	0	1.56828	5.73707	5.26118	5.49913
Aars2	NM_198608	2.60051	5.26118	3.93085	5.73707	5.26118	5.49913
Aarsd1	NM_144829	33.5998	26.5006	30.0502	33.5998	26.5006	30.0502
Aasdh	NM_173765	15.4704	15.7953	15.6328	15.4704	15.7953	15.6328
Aasdhppt	NM_001326359	0	7.1415	3.57075	38.6049	42.4502	40.5275
Aasdhppt	NM_026276	38.6049	35.3087	36.9568	38.6049	42.4502	40.5275
Aasdhppt (ncRNA)	NR_136940	5.15207e-06	7.12994	3.56497	5.15207e-06	7.12994	3.56497
Aasdhppt (ncRNA)	NR_136941	0	0	0	5.15207e-06	7.12994	3.56497
Aatf	NM_019816	100.499	109.182	104.84	100.499	109.182	104.84
AB017108.1-26	AB017108.1-26	52.3758	43.8222	48.099	52.3758	43.8222	48.099
AB031388.1-2	AB031388.1-2	2.04493	3.64791	2.84642	2.04493	3.64791	2.84642
AB056870.1-3	AB056870.1-3	7.73277	3.89796	5.81536	7.73277	3.89796	5.81536
AB076406.1-1	AB076406.1-1	2.56429	4.86518	3.71473	2.56429	4.86518	3.71473
AB124611	NM_001198794	0	3.83283	1.91642	1.70986	3.83283	2.77134
AB124611	NM_206536	1.70986	0	0.854928	1.70986	3.83283	2.77134
AB201711.1-11	AB201711.1-11	5.17705	2.48528	3.83117	5.17705	2.48528	3.83117
AB201711.1-110	AB201711.1-110	1.1217	1.90257	1.51214	1.1217	1.90257	1.51214
AB201711.1-111	AB201711.1-111	0	3.77957	1.88979	0	3.77957	1.88979
AB201711.1-133	AB201711.1-133	1.21969	1.32045	1.27007	1.21969	1.32045	1.27007
AB201711.1-147	AB201711.1-147	3.33372	2.24604	2.78988	3.33372	2.24604	2.78988
AB201711.1-158	AB201711.1-158	2.32315	0	1.16157	2.32315	0	1.16157
AB201711.1-21	AB201711.1-21	2.84833	3.40391	3.12612	2.84833	3.40391	3.12612
AB201711.1-60	AB201711.1-60	0.900677	3.40672	2.1537	0.900677	3.40672	2.1537
AB201711.1-85	AB201711.1-85	10.3237	13.7347	12.0292	10.3237	13.7347	12.0292
AB201711.1-91	AB201711.1-91	1.73457	2.34122	2.0379	1.73457	2.34122	2.0379
AB201711.1-97	AB201711.1-97	236.606	241.365	238.986	236.606	241.365	238.986
AB221601.1-19	AB221601.1-19	4.55232	0	2.27616	4.55232	0	2.27616
Abat	NM_001170978	3.21604	3.58922	3.40263	3.21604	3.58922	3.40263
Abat	NM_172961	0	0	0	3.21604	3.58922	3.40263
Abca1	NM_013454	71.6052	86.3997	79.0024	71.6052	86.3997	79.0024
Abca13	NM_178259	3.32192	3.71333	3.51763	3.32192	3.71333	3.51763
Abca16	NM_001278943	2.83179	4.05849	3.44514	4.72679	6.58601	5.6564
Abca16	NM_001278944	1.89499	2.52753	2.21126	4.72679	6.58601	5.6564
Abca17	NM_001031621	6.70001	7.20144	6.95072	6.70001	7.20144	6.95072
Abca2	NM_007379	32.8834	31.1484	32.0159	32.8834	31.1484	32.0159
Abca3	NM_001039581	6.76283	14.9612	10.862	18.6081	19.4543	19.0312
Abca3	NM_013855	11.8453	4.49302	8.16914	18.6081	19.4543	19.0312
Abca5	NM_147219	7.91529	10.503	9.20916	7.91529	10.503	9.20916
Abca6	NM_001166556	0.225108	0	0.112554	1.75815	2.65367	2.20591
Abca6	NM_001166557	1.44989	2.65367	2.05178	1.75815	2.65367	2.20591
Abca6	NM_147218	0.0831486	0	0.0415743	1.75815	2.65367	2.20591
Abca7	NM_001347081	7.12335	9.45284	8.2881	10.3667	10.0111	10.1889
Abca7	NM_013850	3.24331	0.558304	1.90081	10.3667	10.0111	10.1889
Abca8b	NM_001362749	1.85884	2.18238	2.02061	1.85884	2.18238	2.02061
Abca8b	NM_013851	0	0	0	1.85884	2.18238	2.02061
Abcb10	NM_019552	8.0249	9.64946	8.83718	8.0249	9.64946	8.83718
Abcb1b	NM_011075	6.41534	6.20821	6.31177	6.41534	6.20821	6.31177
Abcb6	NM_023732	76.7145	69.1353	72.9249	76.7145	69.1353	72.9249
Abcb7	NM_009592	17.706	18.8339	18.27	17.706	18.8339	18.27
Abcb8	NM_029020	19.578	21.4285	20.5032	19.578	21.4285	20.5032
Abcb9	NM_019875	1.44355	1.88199	1.66277	1.44355	1.88199	1.66277
Abcc1	NM_008576	35.7786	43.7726	39.7756	35.7786	43.7726	39.7756
Abcc10	NM_001347396	5.50684e-10	0	2.75342e-10	4.74338	4.93758	4.84048
Abcc10	NM_145140	0.901899	1.46851	1.18521	4.74338	4.93758	4.84048
Abcc10	NM_170680	3.84148	3.46907	3.65528	4.74338	4.93758	4.84048
Abcc3	NM_001363187	8.76737e-10	1.08654e-08	5.87107e-09	1.13432	1.89386	1.51409
Abcc3	NM_001363189	1.13432	1.89386	1.51409	1.13432	1.89386	1.51409
Abcc3	NM_029600	1.87421e-09	2.1988e-08	1.19311e-08	1.13432	1.89386	1.51409
Abcc4	NM_001033336	3.40962	0.0245704	1.7171	29.6203	30.9921	30.3062
Abcc4	NM_001163675	24.9255	16.4324	20.679	29.6203	30.9921	30.3062
Abcc4	NM_001163676	1.28525	14.5351	7.91018	29.6203	30.9921	30.3062
Abcc5	NM_013790	21.1601	20.6149	20.8875	33.5143	33.955	33.7347
Abcc5	NM_176839	12.3543	13.3402	12.8472	33.5143	33.955	33.7347
Abcc8	NM_001357538	0	11.6925	5.84627	14.6988	15.2364	14.9676
Abcc8	NM_011510	14.6988	3.54391	9.12138	14.6988	15.2364	14.9676
Abcd1	NM_007435	2.38314	2.92365	2.6534	2.38314	2.92365	2.6534
Abcd2	NM_001358967	0.0278342	2.92448e-07	0.0139172	10.6347	11.9032	11.269
Abcd2	NM_011994	10.6069	11.9032	11.255	10.6347	11.9032	11.269
Abcd3	NM_001355756	6.04897e-06	0.269916	0.134961	20.161	22.2926	21.2268
Abcd3	NM_008991	20.161	22.0227	21.0918	20.161	22.2926	21.2268
Abcd4	NM_008992	5.29273	6.33944	5.81608	5.29273	6.33944	5.81608
Abce1	NM_015751	79.6958	58.9046	69.3002	79.6958	58.9046	69.3002
Abce1 (ncRNA)	NR_152614	3.54564e-05	20.5071	10.2536	3.54564e-05	20.5071	10.2536
Abcf1	NM_013854	107.002	107.265	107.133	107.002	107.265	107.133
Abcf2	NM_001190443	10.0959	13.2677	11.6818	174.577	178.548	176.562
Abcf2	NM_001359205	123.727	165.268	144.498	174.577	178.548	176.562
Abcf2	NM_013853	40.7543	0.0118872	20.3831	174.577	178.548	176.562
Abcf3	NM_013852	46.2819	45.3963	45.8391	46.2819	45.3963	45.8391
Abcg1	NM_009593	13.5664	16.8293	15.1978	13.5664	16.8293	15.1978
Abcg2	NM_001355477	13.7594	12.7382	13.2488	25.9239	35.7081	30.816
Abcg2	NM_011920	12.1644	22.9699	17.5672	25.9239	35.7081	30.816
Abhd10	NM_001272070	22.2196	25.4252	23.8224	30.5159	33.9875	32.2517
Abhd10	NM_172511	8.29631	8.56227	8.42929	30.5159	33.9875	32.2517
Abhd10 (ncRNA)	NR_073572	4.36061	4.27947	4.32004	4.36061	4.27947	4.32004
Abhd11	NM_001190437	21.7686	18.2852	20.0269	21.7686	30.6665	26.2175
Abhd11	NM_145215	0	12.3813	6.19064	21.7686	30.6665	26.2175
Abhd11 (ncRNA)	NR_033794	31.4922	14.6427	23.0674	31.4922	14.6427	23.0674
Abhd11os (ncRNA)	NR_026688	0	2.44694	1.22347	0	2.44694	1.22347
Abhd12	NM_001356549	0	0	0	38.2634	36.4786	37.371
Abhd12	NM_001356550	8.96598e-07	0	4.48299e-07	38.2634	36.4786	37.371
Abhd12	NM_024465	38.2634	36.4786	37.371	38.2634	36.4786	37.371
Abhd13	NM_001081119	17.2796	20.5043	18.8919	19.2683	20.5043	19.8863
Abhd13	NM_026868	1.98872	0	0.994358	19.2683	20.5043	19.8863
Abhd14a	NM_001110271	11.1645	10.5114	10.838	32.2009	27.9885	30.0947
Abhd14a	NM_001110272	0	0	0	32.2009	27.9885	30.0947
Abhd14a	NM_001359225	21.0364	17.477	19.2567	32.2009	27.9885	30.0947
Abhd16a	NM_178592	37.8887	39.0565	38.4726	37.8887	39.0565	38.4726
Abhd17a	NM_145421	50.319	50.8346	50.5768	50.319	50.8346	50.5768
Abhd17b	NM_146096	13.0629	14.9406	14.0018	13.0629	14.9406	14.0018
Abhd17c	NM_133722	34.7738	31.6544	33.2141	34.7738	31.6544	33.2141
Abhd18	NM_026622	3.40744	2.12614	2.76679	3.40744	2.12614	2.76679
Abhd2	NM_018811	28.6269	29.255	28.9409	28.6269	29.255	28.9409
Abhd3	NM_134130	16.4073	17.2924	16.8499	16.4073	17.2924	16.8499
Abhd4	NM_001205181	13.8447	20.6786	17.2616	26.3434	23.0921	24.7178
Abhd4	NM_134076	12.4987	2.41357	7.45613	26.3434	23.0921	24.7178
Abhd5	NM_001359207	0	0	0	26.3156	24.6721	25.4939
Abhd5	NM_026179	26.3156	24.6721	25.4939	26.3156	24.6721	25.4939
Abhd6	NM_001331064	13.6768	7.6473	10.6621	14.1788	14.4296	14.3042
Abhd6	NM_001331065	0	6.78226	3.39113	14.1788	14.4296	14.3042
Abhd6	NM_025341	0.501972	0	0.250986	14.1788	14.4296	14.3042
Abhd8	NM_022419	3.79425	3.78547	3.78986	3.79425	3.78547	3.78986
Abi1	NM_001077190	1.59021	3.09629	2.34325	82.3046	90.0389	86.1718
Abi1	NM_001077192	4.04486	4.78225	4.41356	82.3046	90.0389	86.1718
Abi1	NM_001077193	0	0	0	82.3046	90.0389	86.1718
Abi1	NM_001331043	5.08134	3.80677	4.44406	82.3046	90.0389	86.1718
Abi1	NM_001331044	0.101145	0.306368	0.203757	82.3046	90.0389	86.1718
Abi1	NM_001331045	0.339427	0.379202	0.359315	82.3046	90.0389	86.1718
Abi1	NM_007380	54.1168	42.8594	48.4881	82.3046	90.0389	86.1718
Abi1	NM_145994	17.0308	34.8086	25.9197	82.3046	90.0389	86.1718
Abi2	NM_001198570	4.05998	6.21964	5.13981	40.3149	44.9442	42.6296
Abi2	NM_001198571	1.88399	0.624903	1.25445	40.3149	44.9442	42.6296
Abi2	NM_198127	34.371	38.0997	36.2353	40.3149	44.9442	42.6296
Abi3	NM_001163464	1.25685	0	0.628427	1.97153	1.56405	1.76779
Abi3	NM_025659	0.714672	1.56405	1.13936	1.97153	1.56405	1.76779
Abi3bp	NM_001014399	0.738277	2.59593	1.6671	1.69782	2.59593	2.14688
Abi3bp	NM_001014422	0.00484243	0	0.00242121	1.69782	2.59593	2.14688
Abi3bp	NM_001014423	0.954705	0	0.477353	1.69782	2.59593	2.14688
Abi3bp	NM_001014424	1.94483e-08	0	9.72416e-09	1.69782	2.59593	2.14688
Abi3bp	NM_178790	0	0	0	1.69782	2.59593	2.14688
Abl1	NM_001112703	17.6992	0.0620172	8.88058	35.4665	36.2361	35.8513
Abl1	NM_001283045	0	0	0	35.4665	36.2361	35.8513
Abl1	NM_001283046	12.9017	36.1741	24.5379	35.4665	36.2361	35.8513
Abl1	NM_001283047	4.86569	0	2.43284	35.4665	36.2361	35.8513
Abl1	NM_009594	0	0	0	35.4665	36.2361	35.8513
Abl2	NM_001136104	19.4249	24.4544	21.9396	47.2624	46.9499	47.1061
Abl2	NM_009595	27.8375	22.4956	25.1665	47.2624	46.9499	47.1061
Ablim1	NM_001103177	0	0	0	4.55678	4.36626	4.46152
Ablim1	NM_001103178	3.5564e-07	0	1.7782e-07	4.55678	4.36626	4.46152
Ablim1	NM_001290813	0	3.20371	1.60186	4.55678	4.36626	4.46152
Ablim1	NM_001290815	0	1.24923e-07	6.24614e-08	4.55678	4.36626	4.46152
Ablim1	NM_001290816	2.09277	0	1.04638	4.55678	4.36626	4.46152
Ablim1	NM_001347459	1.35919	0	0.679593	4.55678	4.36626	4.46152
Ablim1	NM_001362445	0	0.0652961	0.032648	4.55678	4.36626	4.46152
Ablim1	NM_001362446	0	0	0	4.55678	4.36626	4.46152
Ablim1	NM_178688	1.10482	1.09726	1.10104	4.55678	4.36626	4.46152
Ablim3	NM_001164491	0	0	0	2.8273	4.10393	3.46561
Ablim3	NM_001360868	2.8273	0	1.41365	2.8273	4.10393	3.46561
Ablim3	NM_198649	0	4.10393	2.05196	2.8273	4.10393	3.46561
Abr	NM_001291186	1.10807e-09	0	5.54036e-10	40.3222	44.151	42.2366
Abr	NM_001346670	3.77137	8.82601e-07	1.88568	40.3222	44.151	42.2366
Abr	NM_001363379	0	0	0	40.3222	44.151	42.2366
Abr	NM_198018	7.72084	11.4056	9.56323	40.3222	44.151	42.2366
Abr	NM_198894	0.000118571	0.0309842	0.0155514	40.3222	44.151	42.2366
Abr	NM_198895	28.8298	32.7144	30.7721	40.3222	44.151	42.2366
Abracl	NM_001359559	0	0.00372525	0.00186263	5.46883	7.07622	6.27253
Abracl	NM_001359560	5.46883	0	2.73442	5.46883	7.07622	6.27253
Abracl	NM_028440	0	7.0725	3.53625	5.46883	7.07622	6.27253
Abraxas1	NM_172405	40.5531	44.7065	42.6298	40.5531	44.7065	42.6298
Abraxas2	NM_198017	32.6548	33.8144	33.2346	32.6548	33.8144	33.2346
Abt1	NM_013924	34.7261	36.0289	35.3775	34.7261	36.0289	35.3775
Abtb1	NM_001362152	21.69	36.4058	29.0479	36.9976	49.8257	43.4117
Abtb1	NM_030251	15.3076	13.4198	14.3637	36.9976	49.8257	43.4117
Abtb1 (ncRNA)	NR_155424	12.7881	2.07828e-06	6.39407	12.7881	2.07828e-06	6.39407
Abtb2	NM_178890	6.42158	6.77979	6.60068	6.42158	6.77979	6.60068
Acaa1a	NM_001357516	0.254846	14.3092	7.28203	31.1337	28.0782	29.6059
Acaa1a	NM_130864	30.8788	13.769	22.3239	31.1337	28.0782	29.6059
Acaa1b	NM_146230	13.9569	12.8656	13.4112	13.9569	12.8656	13.4112
Acaa2	NM_177470	51.6302	52.2315	51.9309	51.6302	52.2315	51.9309
Acaca	NM_133360	58.1493	64.1605	61.1549	58.1493	64.1605	61.1549
Acacb	NM_133904	3.91787	4.3665	4.14218	3.91787	4.3665	4.14218
Acad10	NM_028037	8.74271	10.262	9.50234	8.74271	10.262	9.50234
Acad11	NM_175324	24.8358	26.8272	25.8315	24.8358	26.8272	25.8315
Acad12	NM_178799	13.0043	9.84415	11.4242	13.0043	9.84415	11.4242
Acad8	NM_025862	5.72053	7.2714	6.49597	5.72053	7.2714	6.49597
Acad9	NM_172678	49.5889	48.6583	49.1236	49.5889	48.6583	49.1236
Acadl	NM_007381	26.7058	27.4803	27.0931	26.7058	27.4803	27.0931
Acadm	NM_007382	70.8271	70.8466	70.8369	70.8271	70.8466	70.8369
Acads	NM_007383	22.1524	20.4968	21.3246	22.1524	20.4968	21.3246
Acadsb	NM_025826	12.2347	13.6793	12.957	12.2347	13.6793	12.957
Acadvl	NM_017366	31.356	31.9794	31.6677	31.356	31.9794	31.6677
Acan	NM_001361500	5.59803e-07	1.74879e-06	1.15429e-06	3.49719	3.42786	3.46253
Acan	NM_007424	3.49719	3.42786	3.46253	3.49719	3.42786	3.46253
Acap2	NM_030138	19.3622	20.8914	20.1268	19.3622	20.8914	20.1268
Acap3	NM_207223	18.6992	15.8587	17.279	18.6992	15.8587	17.279
Acat1	NM_144784	48.1226	52.9498	50.5362	48.1226	52.9498	50.5362
Acat2	NM_009338	23.7599	25.2907	24.5253	23.7599	25.2907	24.5253
Acat3	NM_153151	3.33862	2.24488	2.79175	3.33862	2.24488	2.79175
Acbd3	NM_133225	53.3012	51.7592	52.5302	53.3012	51.7592	52.5302
Acbd4	NM_025988	1.39938	0.666932	1.03316	1.39938	0.666932	1.03316
Acbd5	NM_001102436	0.487282	1.13261e-05	0.243646	17.9866	21.488	19.7373
Acbd5	NM_001102437	0.98729	16.9444	8.96584	17.9866	21.488	19.7373
Acbd5	NM_001102438	0.535572	4.54358	2.53957	17.9866	21.488	19.7373
Acbd5	NM_001355637	7.16716	1.82064e-09	3.58358	17.9866	21.488	19.7373
Acbd5	NM_001355638	3.92335	0	1.96167	17.9866	21.488	19.7373
Acbd5	NM_001355639	3.95714	0	1.97857	17.9866	21.488	19.7373
Acbd5	NM_001355641	0	0	0	17.9866	21.488	19.7373
Acbd5	NM_001355642	0	0	0	17.9866	21.488	19.7373
Acbd5	NM_028793	0.92881	4.5349e-05	0.464428	17.9866	21.488	19.7373
Acbd6	NM_001145781	5.88654	3.90999	4.89827	86.7939	82.3483	84.5711
Acbd6	NM_026683	54.0339	55.7117	54.8728	86.7939	82.3483	84.5711
Acbd6	NM_028250	26.8735	22.7266	24.8001	86.7939	82.3483	84.5711
Acbd7	NM_030063	4.25787	2.26313	3.2605	4.25787	2.26313	3.2605
Accs	NM_001290782	0	0.410141	0.20507	1.20527	1.5789	1.39208
Accs	NM_183220	1.20527	1.16875	1.18701	1.20527	1.5789	1.39208
Acd	NM_001012638	4.69714	11.942	8.31958	18.0722	25.5917	21.832
Acd	NM_001348349	13.3751	13.6497	13.5124	18.0722	25.5917	21.832
Acd (ncRNA)	NR_145824	0	0	0	14.5059	0	7.25296
Acd (ncRNA)	NR_145825	14.5059	0	7.25296	14.5059	0	7.25296
Ace	NM_001281819	11.7131	3.18508	7.44909	16.719	16.2422	16.4806
Ace	NM_009598	0	1.54364	0.771819	16.719	16.2422	16.4806
Ace	NM_207624	5.0059	11.5135	8.25969	16.719	16.2422	16.4806
Acer1	NM_175731	2.60145	3.3956	2.99852	2.60145	3.3956	2.99852
Acer2	NM_001290541	2.09917	2.47525	2.28721	15.9823	19.3122	17.6472
Acer2	NM_001290543	13.8831	16.8369	15.36	15.9823	19.3122	17.6472
Acer2	NM_139306	0	0	0	15.9823	19.3122	17.6472
Acer3	NM_001360615	0	1.74491	0.872457	5.93092	10.7949	8.36292
Acer3	NM_001360616	0	0	0	5.93092	10.7949	8.36292
Acer3	NM_001360617	2.35359	0	1.17679	5.93092	10.7949	8.36292
Acer3	NM_025408	3.57733	9.05001	6.31367	5.93092	10.7949	8.36292
Acer3 (ncRNA)	NR_153759	3.92416	0	1.96208	3.92416	0	1.96208
Acin1	NM_001085472	0	0	0	98.6286	95.2709	96.9497
Acin1	NM_001085473	43.1591	29.9806	36.5699	98.6286	95.2709	96.9497
Acin1	NM_001242605	0	0	0	98.6286	95.2709	96.9497
Acin1	NM_001242606	8.89908	2.30484	5.60196	98.6286	95.2709	96.9497
Acin1	NM_019567	0	0	0	98.6286	95.2709	96.9497
Acin1	NM_023190	46.5704	62.9854	54.7779	98.6286	95.2709	96.9497
Ackr4	NM_145700	2.82611	4.73931	3.78271	2.82611	4.73931	3.78271
Acly	NM_001199296	79.1093	53.393	66.2511	173.583	178.175	175.879
Acly	NM_134037	94.4738	124.782	109.628	173.583	178.175	175.879
Acmsd	NM_001033041	1.88873	1.87792	1.88332	1.88873	1.87792	1.88332
Acnat1	NM_001164565	8.57189	7.34583	7.95886	8.57189	7.34583	7.95886
Aco1	NM_007386	26.7532	23.3993	25.0763	26.7532	23.3993	25.0763
Aco2	NM_080633	106.778	107.661	107.219	106.778	107.661	107.219
Acot1	NM_012006	4.39433	4.37087	4.3826	4.39433	4.37087	4.3826
Acot11	NM_001347159	2.30464	2.38798	2.34631	2.30489	2.38818	2.34653
Acot11	NM_025590	0.000241369	0.000197281	0.000219325	2.30489	2.38818	2.34653
Acot13	NM_025790	164.246	202.619	183.432	164.246	202.619	183.432
Acot2	NM_134188	8.05286	6.9597	7.50628	8.05286	6.9597	7.50628
Acot6	NM_172580	1.49034	1.61004	1.55019	1.49034	1.61004	1.55019
Acot7	NM_001146057	66.9304	41.6428	54.2866	72.3778	69.2979	70.8379
Acot7	NM_001146058	5.44745	27.6552	16.5513	72.3778	69.2979	70.8379
Acot7	NM_133348	1.52896e-07	7.22845e-09	8.00621e-08	72.3778	69.2979	70.8379
Acot8	NM_001362756	5.70843	0	2.85422	11.5411	9.56796	10.5545
Acot8	NM_001362757	5.83264	6.60736	6.22	11.5411	9.56796	10.5545
Acot8	NM_133240	0	2.9606	1.4803	11.5411	9.56796	10.5545
Acot9	NM_001313718	94.0339	136.712	115.373	127.231	136.712	131.971
Acot9	NM_019736	33.1969	0	16.5985	127.231	136.712	131.971
Acox1	NM_001271898	6.65113	6.65859	6.65486	19.8142	22.4893	21.1517
Acox1	NM_015729	13.163	15.8307	14.4969	19.8142	22.4893	21.1517
Acox3	NM_001357018	3.6291	4.07296	3.85103	6.37307	6.93239	6.65273
Acox3	NM_001357019	0.000497906	0.492737	0.246618	6.37307	6.93239	6.65273
Acox3	NM_001357020	2.74341	2.29543	2.51942	6.37307	6.93239	6.65273
Acox3	NM_030721	5.87074e-05	0.0712628	0.0356607	6.37307	6.93239	6.65273
Acp1	NM_001110239	6.09365	6.87991	6.48678	15.1571	19.3079	17.2325
Acp1	NM_021330	9.06344	12.428	10.7457	15.1571	19.3079	17.2325
Acp2	NM_001357067	4.02495	4.01934	4.02214	8.04989	8.03868	8.04428
Acp2	NM_007387	4.02495	4.01934	4.02214	8.04989	8.03868	8.04428
Acp5	NM_001102404	6.01194	0	3.00597	6.01194	7.3456	6.67877
Acp5	NM_001102405	8.05844e-06	0	4.02922e-06	6.01194	7.3456	6.67877
Acp5	NM_007388	0	7.3456	3.6728	6.01194	7.3456	6.67877
Acp6	NM_019800	66.6288	65.09	65.8594	66.6288	65.09	65.8594
Acpp	NM_019807	0.868358	0.642444	0.755401	4.57443	4.52864	4.55153
Acpp	NM_207668	3.70607	3.88619	3.79613	4.57443	4.52864	4.55153
Acr	NM_001205049	0	0	0	0.518248	1.79823	1.15824
Acr	NM_001277245	0	1.79823	0.899116	0.518248	1.79823	1.15824
Acr	NM_001277246	0	0	0	0.518248	1.79823	1.15824
Acr	NM_001277247	0.518248	0	0.259124	0.518248	1.79823	1.15824
Acr	NM_013455	0	0	0	0.518248	1.79823	1.15824
Acrbp	NM_001127340	5.56117	6.75493	6.15805	6.60838	7.17864	6.89351
Acrbp	NM_016845	1.04721	0.42371	0.735458	6.60838	7.17864	6.89351
Acsbg1	NM_053178	4.92492	5.83549	5.3802	4.92492	5.83549	5.3802
Acsbg2	NM_001039114	0.88213	1.25801	1.07007	0.88213	1.25801	1.07007
Acsf2	NM_153807	20.4523	16.4675	18.4599	20.4523	16.4675	18.4599
Acsf3	NM_144932	5.92815	8.18892	7.05853	5.92815	8.18892	7.05853
Acsl1	NM_001302163	30.7439	5.49632	18.1201	33.7762	37.6704	35.7233
Acsl1	NM_007981	3.03235	32.174	17.6032	33.7762	37.6704	35.7233
Acsl3	NM_001033606	93.7316	99.9296	96.8306	93.7316	110.505	102.118
Acsl3	NM_001136222	0	0	0	93.7316	110.505	102.118
Acsl3	NM_028817	7.85841e-06	10.5757	5.28784	93.7316	110.505	102.118
Acsl4	NM_001033600	2.39147	4.17483	3.28315	9.02721	10.4256	9.72641
Acsl4	NM_019477	1.15831	1.46322	1.31076	9.02721	10.4256	9.72641
Acsl4	NM_207625	5.47743	4.78755	5.13249	9.02721	10.4256	9.72641
Acsl5	NM_027976	2.44028	1.3159	1.87809	2.44028	1.3159	1.87809
Acsm2	NM_001177977	6.95877e-06	3.14544	1.57272	2.30821	3.14544	2.72683
Acsm2	NM_001177978	0.546967	0	0.273484	2.30821	3.14544	2.72683
Acsm2	NM_146197	1.76124	0	0.880618	2.30821	3.14544	2.72683
Acss1	NM_080575	6.35935	5.72112	6.04024	6.35935	5.72112	6.04024
Acss2	NM_019811	34.6135	41.4336	38.0236	34.6135	41.4336	38.0236
Acta2	NM_007392	1.97569	1.97471	1.9752	1.97569	1.97471	1.9752
Actb	NM_007393	1419.49	1301.72	1360.6	1419.49	1301.72	1360.6
Actg1	NM_001313923	7.61105	4.5282	6.06962	779.949	720.123	750.036
Actg1	NM_009609	772.338	715.595	743.966	779.949	720.123	750.036
Actl6a	NM_019673	77.7018	72.6454	75.1736	77.7018	72.6454	75.1736
Actn1	NM_001346669	4.05516	6.01604	5.0356	19.1989	17.0205	18.1097
Actn1	NM_134156	15.1438	11.0044	13.0741	19.1989	17.0205	18.1097
Actn2	NM_033268	31.3504	37.5819	34.4662	31.3504	37.5819	34.4662
Actn3	NM_013456	12.7	14.7853	13.7427	12.7	14.7853	13.7427
Actn4	NM_001360548	5.81572	0.0514825	2.9336	43.9786	45.05	44.5143
Actn4	NM_001360549	2.69311	7.67026	5.18168	43.9786	45.05	44.5143
Actn4	NM_001360550	0.000122901	0.0646286	0.0323758	43.9786	45.05	44.5143
Actn4	NM_021895	35.4696	37.2637	36.3667	43.9786	45.05	44.5143
Actr10	NM_019785	55.0623	66.7849	60.9236	55.0623	66.7849	60.9236
Actr1a	NM_001365070	0.0475889	1.82295	0.93527	30.3911	30.7488	30.57
Actr1a	NM_016860	30.3435	28.9258	29.6347	30.3911	30.7488	30.57
Actr1b	NM_146107	41.0922	40.0474	40.5698	41.0922	40.0474	40.5698
Actr2	NM_001362899	36.8395	18.086	27.4627	36.8476	41.1565	39.002
Actr2	NM_146243	0.00812069	23.0705	11.5393	36.8476	41.1565	39.002
Actr3	NM_001205385	7.45555	2.70909	5.08232	158.994	148.719	153.857
Actr3	NM_001205386	27.0447	34.9107	30.9777	158.994	148.719	153.857
Actr3	NM_023735	124.494	111.099	117.797	158.994	148.719	153.857
Actr3b	NM_001004365	12.2196	10.3607	11.2901	15.807	15.2464	15.5267
Actr3b	NM_001310504	3.58743	4.8857	4.23656	15.807	15.2464	15.5267
Actr5	NM_175419	20.9071	21.1664	21.0368	20.9071	21.1664	21.0368
Actr6	NM_001359468	14.331	16.783	15.557	65.7425	66.4239	66.0832
Actr6	NM_001359469	1.99815	4.80839	3.40327	65.7425	66.4239	66.0832
Actr6	NM_025914	49.4133	44.8325	47.1229	65.7425	66.4239	66.0832
Actr8	NM_027493	39.8278	43.426	41.6269	39.8278	43.426	41.6269
Acvr1	NM_001110204	1.73066	1.94495	1.8378	10.128	12.3485	11.2382
Acvr1	NM_001110205	0.430988	8.50072	4.46585	10.128	12.3485	11.2382
Acvr1	NM_001355048	1.17905	0	0.589526	10.128	12.3485	11.2382
Acvr1	NM_001355049	0	0	0	10.128	12.3485	11.2382
Acvr1	NM_007394	6.78725	1.90284	4.34505	10.128	12.3485	11.2382
Acvr1b	NM_007395	17.7632	19.1674	18.4653	17.7632	19.1674	18.4653
Acvr2a	NM_007396	12.2204	15.2853	13.7529	12.2204	15.2853	13.7529
Acvr2b	NM_001313757	13.6331	14.9913	14.3122	14.9569	14.9913	14.9741
[truncated: 30,050 more rows]
