# Supplementary material for: DAZL mediates a broad translational program regulating expansion and differentiation of spermatogonial progenitors
Source: eLife journal article supplement (doi:10.7554/elife.56523), 2020-07-20
Supplement: supp [file elife-56523-supp-v1.zip › elife_poa_e56523_Figure_3_source_data_1.xlsx]

## Sheet: Description
Figure 3 - source data 1
Tab Name	Description
GO Slim Biological Processes	GO Slim Biological Processes analysis via PANTHER v14.1 with Fisher Exact test and Bonferroni correction for multiple testing.

## Sheet: GO Slim Biological Processes
PANTHER GO-Slim Biological Process	Background - expressed in undifferentiated spermatogonia	DAZL targets	Expected no. in DAZL targets	over/under	fold Enrichment	P-value
regulation of mRNA metabolic process (GO:1903311)	60	35	12.08	+	2.9	0.00322
regulation of mRNA processing (GO:0050684)	57	32	11.47	+	2.79	0.0144
regulation of RNA metabolic process (GO:0051252)	74	39	14.9	+	2.62	0.00714
mRNA splicing, via spliceosome (GO:0000398)	149	68	29.99	+	2.27	0.000143
RNA splicing, via transesterification reactions with bulged adenosine as nucleophile (GO:0000377)	149	68	29.99	+	2.27	0.000143
RNA splicing, via transesterification reactions (GO:0000375)	150	68	30.19	+	2.25	0.000159
RNA processing (GO:0006396)	205	91	41.27	+	2.21	2.77e-06
RNA splicing (GO:0008380)	159	68	32.01	+	2.12	0.000826
regulation of nucleobase-containing compound metabolic process (GO:0019219)	145	61	29.19	+	2.09	0.00634
regulation of cellular metabolic process (GO:0031323)	371	122	74.68	+	1.63	0.00675
transcription by RNA polymerase II (GO:0006366)	708	231	142.52	+	1.62	4e-07
regulation of biosynthetic process (GO:0009889)	548	176	110.31	+	1.6	0.000136
regulation of cellular biosynthetic process (GO:0031326)	548	176	110.31	+	1.6	0.000136
regulation of RNA biosynthetic process (GO:2001141)	541	173	108.9	+	1.59	0.000256
regulation of nucleic acid-templated transcription (GO:1903506)	495	158	99.64	+	1.59	0.000991
regulation of transcription, DNA-templated (GO:0006355)	495	158	99.64	+	1.59	0.000991
regulation of metabolic process (GO:0019222)	1027	326	206.73	+	1.58	6.43e-10
regulation of transcription by RNA polymerase II (GO:0006357)	462	146	93	+	1.57	0.00395
gene expression (GO:0010467)	1414	444	284.63	+	1.56	5.59e-14
transcription, DNA-templated (GO:0006351)	888	277	178.75	+	1.55	2.26e-07
macromolecule metabolic process (GO:0043170)	1887	578	379.84	+	1.52	1.57e-17
organic substance metabolic process (GO:0071704)	2540	693	511.28	+	1.36	9.5e-12
regulation of biological process (GO:0050789)	1770	482	356.29	+	1.35	7.53e-07
biological regulation (GO:0065007)	2009	519	404.4	+	1.28	8.21e-05
metabolic process (GO:0008152)	2986	765	601.06	+	1.27	2.44e-08
Unclassified (UNCLASSIFIED)	6241	1090	1256.27	-	0.87	0
