# Supplementary material for: DAZL mediates a broad translational program regulating expansion and differentiation of spermatogonial progenitors
Source: eLife journal article supplement (doi:10.7554/elife.56523), 2020-07-20
Supplement: supp [file elife-56523-supp-v1.zip › elife_poa_e56523_Figure_3_source_data_2.xlsx]

## Sheet: Description
Figure 3 - source data 2
Tab Name	Description
Naqvi et al., 2019 RNAseq	log2(TPM) values across 12 tissues from adult male mice. RNA-seq data were originally collected by Naqvi et al. (2019) and reanalyzed here.
Testis-specific genes	1590 genes identified as testis-specific. Each gene was expressed at a minimum of 5 TPM in the testis, and at least 25% of its log2 normalized expression summed across all 12 tissues came from the testis ("Fraction of normalized expression from testis").
Exp. breadth, all genes	Expression breadth ("Exp.breadth") of all genes based on RNA-seq data from 12 male mouse tissues.
Exp. breadth, gonia genes	Expression breadth within the testis of DAZL targets and nontargets in undifferentiated spermatogonia

## Sheet: Naqvi et al., 2019 RNAseq
Genes	Adipose	Adrenal	Brain	Colon	Heart	Liver	Lung	Muscle	Pituitary	Skin	Spleen	Testis	Thyroid
0610009B22Rik	6.57279632137848	7.19398517550372	6.31457466565384	6.31665379468553	6.6476101922004	5.98666175299302	5.61680962246654	6.69234733059817	6.12653675900063	6.15350789122326	5.07758634307285	6.21763370673695	6.78036114905564
0610010B08Rik	2.66320632788669	3.10428139203856	4.45850509091214	2.62338902439262	2.61136600673231	2.09149116474221	2.9208618660313	2.04120672120562	2.75037844854443	3.22627111601281	3.05572753833867	1.9670651800464	3.1166652389337
0610010F05Rik	4.33270861112623	3.70235026859758	5.36962584938096	3.51293079523914	3.07553988421447	2.68812168141764	3.65341196698245	3.77416752569654	3.84818188490809	3.29826018226638	2.9281761440833	2.75606551388598	3.62341351068905
0610010K14Rik	5.98673870648521	6.0933607520294	6.04399956830816	5.56438605831618	5.67630914815573	4.53560450388665	6.14444833351028	5.31243483315428	5.23522218544659	6.37334322687051	6.60163114504453	4.51407512889169	6.56147311432871
0610030E20Rik	4.82532934280073	4.74633343265053	4.29320915127562	4.97377986958346	3.78204333583287	4.1970025233097	4.89104630804414	3.68792037282445	4.17948809441005	5.22131248668549	5.65382530555925	4.60572218082701	4.84759212211488
0610037L13Rik	5.70732937660437	6.13331536822515	5.96675551179554	5.2222085417982	5.56310441872069	4.09028931291023	5.82026581933974	5.17076596204262	5.11687396341562	5.64668084184065	5.34310897618721	5.45011951427269	5.84222958021912
0610040J01Rik	0.60856981458104	0.675864893320567	2.84530471237755	6.23603141443067	2.16679358628367	4.45031660565992	4.10021108007407	3.29204515485576	1.7451935266451	1.06849153709462	1.57679309537282	0.128030364387793	4.41011922299663
1110004F10Rik	6.84053560687466	7.8083267352754	7.7032599185264	6.66674842669697	6.50464323841579	5.61326376495297	6.84248940155611	6.3009908959534	6.81047119185623	6.87518727270895	6.96984911864165	6.49165669697099	7.14844380094495
1110008L16Rik	3.49571476025969	4.02856619396209	2.85862402608262	3.60235153563748	2.80657253682185	3.04996029724427	2.62508272438288	3.18469544795812	2.91887480316863	3.32660257950955	3.21305615019212	3.06960164535492	3.87013134117238
1110008P14Rik	6.90793228846962	8.30403677762634	8.73829753601708	5.3437662291877	6.06938615874928	4.88172400313918	6.02483341100809	5.64942922516198	6.08040993706054	5.92963018701321	5.94860398477852	5.14107447348578	6.67986313804474
1110012L19Rik	5.16460094657838	5.30594848363734	4.81669244229282	5.21580119908663	4.79436323397768	4.35419630494991	4.96457712844553	5.28401895448711	4.70421426795537	5.39376685490002	4.44531303971032	1.7434240110767	5.51662520619797
1110017D15Rik	0.4374494488146	0.749588281781276	3.35706216402864	0.534461643434017	0.115228929730138	0.0597922018049518	5.67865066248901	0.258219939201239	2.78983404506212	0.324313814754051	0.390766950991451	8.89833274363625	1.25292272115817
1110025L11Rik	0	0	0	0	0	0	0	0	0	0.83368875352846	0	1.38624235922696	0
1110032A03Rik	5.35918166893246	4.86252236984445	4.85604710741683	4.46843065175798	3.42994257322317	3.95305756248987	4.62605138773692	3.36008334044986	4.40419104451188	4.0242389770476	3.37923524408098	7.51310512097597	5.32454463866324
1110032F04Rik	0.0361079573276182	0.260247781416165	3.85451344820216	0.356618115457925	0.407030432794292	0	0.485761109134128	0.0178249363340088	0.369529591992009	0.422967429477889	1.13654337785352	0.0230056074998662	0.0791156546890494
1110038F14Rik	4.71456012452321	5.30597864570755	4.46195154527276	4.32192461905917	4.01407121871547	2.7468927388293	4.84855859412182	3.74691992297635	4.68160694287364	4.61198182675759	4.91807760264261	3.02897713775847	4.6017751813495
1110051M20Rik	3.32799583230001	4.88325118028504	6.63670692827072	3.20978610218517	3.5254011244571	1.66326252050927	4.62481463726152	4.60359001454726	5.06383268512996	4.37019605470088	3.27518724300783	5.51539960602672	4.41067429023228
1110059E24Rik	5.43838687645466	5.92695532469375	5.72154802561603	6.9965267522439	5.05771254018966	4.52812842744778	5.89222668969601	3.93817742959543	5.31245459009673	5.16175095667696	6.40842655545789	5.23152704412723	5.72642562886947
1110059G10Rik	3.57680536854652	3.85054032003735	3.71205997011114	3.52417696740209	3.42469358872396	2.29292642694112	3.71704388523117	2.49709237833944	3.16068147846311	3.53814577966685	3.65470843220735	2.48272978837592	3.68548250362859
1110065P20Rik	5.37985992862947	5.91285080706029	6.65417068600071	4.91228096837594	4.95888122920786	4.72422595184853	4.72143585048158	4.94237536716983	5.91254655677821	5.07421865772975	4.08103300859945	7.17467620211494	6.19653672097279
1190002N15Rik	5.45966796400339	4.35041957326292	5.01521057043723	4.61803650417635	5.28228753943005	4.13577604693685	6.30823061447368	2.4659535912189	3.29097722538441	4.91927048159204	4.02849841351081	2.1651805633631	3.51504021546852
1190005I06Rik	5.46348502283846	2.57501194017883	4.35235921448602	1.93285647314604	2.64866589899536	3.39273405812014	1.60724992925618	1.16365765597718	2.91444030767176	3.52549532469747	0.543089861155672	5.14453910583672	4.29812704316798
1190007I07Rik	4.61148325486666	5.20927513460535	5.22255697437007	4.98620094631231	5.59669125224127	4.41008907235046	4.29606503133516	5.71286212833281	4.31081919520176	4.80939349510846	4.88174780594725	3.37832618688144	5.17987493100183
1300017J02Rik	0.0802608145173492	0.37536134083887	0.306556076204727	0.0412974065574896	0.117046423845407	8.50584552707739	0.150999340809926	0.143397208962244	0.0657942482836592	0.018971823070717	3.57065403813502	4.17748729298153	0.0417573059240462
1500009L16Rik	2.04419744701375	5.52818624568766	5.33719302309287	3.60228084192623	3.0381535299712	0	2.70603599954815	0.921009754144474	3.06177699496948	1.68689889220867	0.915239103282159	4.15425942823229	3.31618369900493
1500015O10Rik	2.72675701531064	8.95538190501637	4.34000058138525	1.23018029237858	1.74921210223734	0.150376933116562	1.71082406735642	3.20859234525799	2.84387091635095	2.04187772618627	2.87512391847233	0.872558101973195	8.64037601958741
1600002K03Rik	4.74472016371291	5.60500636851101	4.23745684187443	5.07828606780673	4.04718391227455	3.30677790275421	4.66992767112217	4.75227337583755	4.99451366354238	5.04007789310079	4.78284386538318	3.74213347384278	5.0530854404675
1600012H06Rik	5.57531876067908	5.81281663461241	5.01356315038093	5.74415327580278	4.43731101535592	4.62067990801483	5.47143989855127	3.73456351928345	4.70769828066187	5.62066703285685	5.33590069429506	3.42032243632109	5.36543813403046
1600014C10Rik	6.4656162969846	5.12127653106315	4.83703990808757	3.32076262605347	4.7656895826207	6.14447681778922	3.97963593817902	4.56783208434428	4.06177371185758	4.17682383736674	4.65316020454058	1.62180981657795	4.24200367761864
1600014C23Rik	0	0.106134205684596	0.535386568692715	0	1.14749049458393	0	0.0625049931640851	0.0795588506583677	0.143911815731288	0	0	2.56812379307815	0.315789411098569
1600015I10Rik	0.327540063010703	0	0	0	0.359964200386659	0	0.0146071633266044	0.0648277968078137	0.0292256229837191	0	0	0	1.18284577537297
1700001C02Rik	0	1.30098756660553	1.44609109953543	0.0572938530988934	0	0	4.71063260912133	0	2.70747868257809	0	0	8.37564444467902	0.664321584563167
1700001C19Rik	0.671246589658936	0.926444042793532	1.62895650344872	0.578833865380152	1.54097448658229	3.52522596393695	0.75091142845943	0.625493168842044	0.68258374847904	0.844867925324299	0.571765878854407	8.0457829466356	0.766356529449706
1700001F09Rik	0	0	0	0		0	0	0	0.267001929022109	0	0	9.02067360950203	0
1700001J03Rik	1.94462775814292	2.65825865037737	0.973867041689599	1.41846334757126	1.1074609534865	0.120773835031536	1.84790531614245	1.86525708119273	1.77629378415466	1.33348421458705	1.13115100163149	8.71824983898283	3.3435387300325
1700001K19Rik	1.43996937768848	1.78641966808766	2.97079227976754	1.00365284600189	1.63516802676958	0.0946042169792394	1.64423682222398	1.65658441532964	1.89861811589112	2.22254434893699	1.01575011321226	8.62073284357612	2.00565937106743
1700001L19Rik	0	0.740620329096298	4.40628774859136	0.595376059613505	0.0550979944628755	0	2.52414276000706	0.0305984567570952	1.98896572372371	0.382632330651857	0.0184775885507974	6.88380831405562	0.892857634064607
1700001O22Rik	0.265442254378547	0.796754956987445	2.4314933217255	1.55557450684031	0.0602164898869294	0	0.295929398860993	2.17155853435143	0.105073337060549	1.29803047743185	0.298074415196845	5.09975130652893	1.26243246811159
1700001P01Rik	0.202889898219388	0.774052493930492	2.03871239115789	0.603143740485023	0.529692699792273	0.165387983609556	0.610748961695747	0.254050314113278	0.906758260981533	1.03832474354009	0.482111703033138	7.62166038791989	0.32132075050212
1700003E16Rik	0.356206144638024	1.58752750007433	4.80823068559276	2.25651778507563	1.00764159926729	1.15860065136924	2.88265948867792	0.131798813230116	2.18599564903856	1.43716886499865	0.441490119883455	8.98998239695906	2.68742626254773
1700003F12Rik	1.24617620220067	0.736993608036106	3.40363497366378	0.377512363761984	0.322040528442174	0.175228024335546	0.69537539830561	0.325900597671712	0.597320959684862	1.26855431219689	1.60464939014612	9.56239645150311	0.711991535716868
1700006A11Rik	0	0	0	0	0	0	0	0	0	0	0	7.18808602179018	0
1700007K13Rik	0.549670789791845	1.1928924141048	3.50433242333432	0.54389770708904	0.0658082850481442	0	5.79442707690015	0.136320879941947	3.29200852991868	1.79709397079312	0	6.8166265537408	1.63022995475475
1700008O03Rik	0.346754402114295	1.33281769434104	3.78988367269466	0.66059707509458	0.452114008169907	0.228792162076105	0.530108752545245	0.0483465766200931	1.86266043105661	0.396361952180042	0.490437647296902	5.99942449774382	1.38972137114297
1700008P02Rik	0	0	0	0	0	0	0	0	0	0	0	7.31614645929922	0
1700009N14Rik	0.0758728754066259	0	0	0	0	0	0	0	0	0	0	9.87313645789268	0
1700010B08Rik	0.132875257226088	0.120561314720687	0.305003985372759	0.220380546982406	0.523166816529358	0.0762477054278477	0.239904969388915	0	0.253144689551103	0.111668838997495	0.346782704321206	8.08095749228113	0.214528791090081
1700010D01Rik	0	0	0	0	0	0	0	0	0	0	0	8.58237097681817	0
1700010I14Rik	1.17795585909301	2.51314519346931	1.42142993825037	2.6803171293202	0.187971018064337	0.484556559126189	1.5178081396069	0.278286779114289	2.42616581661446	0.357907777541816	2.36583636667195	9.2871382470395	2.12070430304573
1700011L22Rik	0.16393186220801	0.289978127456825	0	0.104145841189544	0	0	0.285633245655219	0	0.0292783777487454	0.0552550445133549	0	8.55946618030209	0
1700012A03Rik	0	0	0	0	0	0	0	0	0	0	0	8.48676503265263	0
1700012B07Rik	0	0	0	0.0327138252636942	0	0	0.301978259156056	0	0	0	0	8.47587533085148	0
1700012B09Rik	0	0	1.5773337271147	0.296759065731825	0	0	3.26179404260177	0	0.340941770194515	0	0.0685029193312311	8.40058595330762	0
1700012P22Rik	0	0	0	0	0	0	0	0	0	0.477331308086644	0	7.00156321586283	0
1700013D24Rik	0	0	0	0	0	0	0	0	0	0	0	8.38002689389944	0
1700013F07Rik	0	0.915097988581606	3.23774313058524	0.378389027765237	0	0	4.6490078150194	0	3.62853370163342	0.353469655232667	0	9.63459466678986	1.53760422738824
1700013G24Rik	0	0	0	0.504586027909331	0	0	0	0.0692259136441596	0	0.0469031773430825	0	9.55918247742842	0
1700013H16Rik	0	0	0	0	0.0915959735049092	0	0.0412667425797999	0	0	0.339726513717117	0	6.30213708417838	0.0360091869990052
1700015F17Rik	0	0.0779722632043425	0.248599611853265	0	0	0	0.0544994619423606	0	0.0980052111698786	0	0	8.33464655189379	0.0850526302896965
1700015G11Rik	0	0	0	0	0	0	0	0	0.924175201618182	0	0	9.97820834558435	0
1700016C15Rik	0.107136118592805	0.285899659767143	0.596471068537304	0.547482591161326	0.0559741616202491	0	0.758917064849486	0.768733171419419	0.107802382374838	1.65306972017335	0.0568771547456289	7.90581268382653	1.6155351286454
1700016D06Rik	1.97826941646652	2.36299205995013	3.40795301283252	2.40876884665652	2.14649770002787	1.90457771011456	2.70079308852786	2.21812775151448	2.41858317210096	2.98459633320599	3.2980925265315	7.06687194844604	2.69717290156253
1700016H13Rik	0.163471110594498	0	0.138932133547709	1.18433184241507	0	0	1.19201890966411	0	0.0154252665317215	0.347040486137725	0.110425118725098	9.2015514852149	0
1700016K19Rik	0	0.119118301507833	2.99142188665359	2.27449199312741	0	0	4.9186098019051	0	1.03563117843748	0	0.663858585507658	8.44061283494919	1.23913320061246
1700017B05Rik	3.13318500433126	3.83669890970847	2.75047479077513	2.86105949815793	1.63344144411806	1.67151081165519	2.61148963287442	0.961832661162214	2.10091155528617	2.66906042008099	3.79480490353853	5.5099724636955	1.93812693135754
1700017D01Rik	0	0	0	0	0	0	0	0	0	0	0	8.72622003323007	0
1700017N19Rik	0	0	0	0	0	0	0	0	0	0	0	8.12343669714151	0
1700018B08Rik	0	0	0	0	0	0	0	0	0.0638668830994671	0.0799782767592347	0.0267765053281241	7.64490370424391	0
1700018F24Rik	0	0	0	0	0	0	0.40069330432366	0	0	0	0	7.17905551044784	0
1700019A02Rik	0	0.342473552120605	1.44686182757069	0	0.134682963345919	0.206500432489257	0.342801821931667	0.115813138221299	0.472987537734091	0.114253496635516	0.446513594462989	9.18283240957244	0
1700019D03Rik	2.0125752151335	1.09751677042356	3.89697267413658	4.1431365219977	1.50532236449709	0.0704496181222098	0.712119340885693	0.929685228636605	2.90321102213627	2.78951944593694	0.575206959576841	9.08737879724054	3.44317476875069
1700019N19Rik	0	0.0639660312029075	0.32438226928378	0	0	0	0.0797058925206742	0	0.310743494581996	0	0	9.06278513064444	0
1700020A23Rik	0.198996592343708	0.162295800597855	2.49427912754351	0.169911629101637	0.258598725023207	0	0.442896139205105	0.151163619483975	0.434548374995754	0.213479961199255	0.517554961812171	6.91076240190347	0.170268831606528
1700020D05Rik	1.01264527196357	1.59979694737607	3.18574756288218	0.895723308199795	1.01101684410133	0.554365797036638	1.66244069781901	0.687766390287651	2.19350662346056	1.13399293278876	2.17286383665317	8.86669648478972	1.00251508845249
1700020L24Rik	5.3742936867038	3.47130129232771	1.84114019342378	3.63639244509212	1.54730333020752	0.107610851234187	4.20388934877118	1.11409129008758	0.944546559760548	3.65995041617048	2.81322238583639	7.18002870207279	2.01872565251352
1700020N15Rik	0	0	0	0	0	0	0	0	0	0	0	7.47627947063302	0
1700021F05Rik	5.90770909216051	6.30103796088291	6.07433655301327	6.01120297904816	7.35900295448288	5.04108529771641	4.94776673112601	6.94744266662922	4.64226548792439	5.86161247552837	4.50868048885961	5.68521666693046	6.10493822871814
1700021F07Rik	0	0	0.313462462750112	0	0	0	0	0	0	0	0	8.30860145588257	0
1700022I11Rik	0	0.00648486494459972	0.0408130773304469	0	0.0248632074476333	0	0	0.026391416936605	0.00834318860793134	0	0.0236685118797919	3.72292043735435	0.0143707969275586
1700023F06Rik	0.106475563895025	1.00295897155709	2.28279721272416	0.414832194265835	0.0359103387549931	0	0.0791845409586356	0	2.1476360690537	0.487040745612027	0	7.70532786155685	0.724128767515495
1700024G13Rik	0	0	1.48616356419046	0	0	0	6.06391664052179	0	0.460707970199202	0	0	8.49877181108257	0
1700024P04Rik	0	0	0	0	0	0	0	0	0.59171830646906	0	0	9.15310692041474	0
1700025F22Rik	0	0.86474413722623	0	0	0	0	0	0	0	0	0	8.3837977463011	0
1700025G04Rik	2.37788821648697	4.2111148769161	5.03820538655813	2.78590777419702	3.27649249795458	0.845090649214569	2.33146028091787	4.49999485357685	3.58614075240054	4.28820483653631	2.35958779374276	2.6145698753365	2.64748092594101
1700028K03Rik	1.34697324957848	1.83570911073444	3.0815775541931	1.17517430021836	0.785272911183511	0.524844405070893	1.3837495185546	0.881873046133916	1.97694293661379	1.58101939477895	1.87463666885209	5.42401346576675	1.81325111210644
1700028P14Rik	0	0	2.50950339411174	0	0	0	3.52630919772396	0	0.97230896992816	0.170433304588035	0	8.83899508844612	0
1700029F12Rik	0.207088470802946	0.340362297408939	0.383190914201415	0.0854422611914108	0.127614929726726	0.895303361378434	0.0356838378113619	0.0587373011909479	0.352336128182973	0.0919877856834583	0.249727460569148	9.82309025942403	0.268102623860179
1700029H14Rik	0	0	0.11782036394943	0.0222115493014739	0	0	0.0228474414531056	0	0	0.0748112100010431	0.194910607079356	9.2056073680502	0
1700029I15Rik	4.87533595674731	4.62034084425395	4.00338443759845	3.54573166713548	2.29445904075048	2.7710274059231	3.50566760204935	1.68803566303759	4.40488815644719	4.67043522141282	3.3925234432812	7.63279400432533	4.40904005143473
1700029J07Rik	2.56471711960236	3.50788435413411	3.37358051619771	1.86470750638487	2.34768092492031	1.05363496230808	4.14731549128399	1.50605543262871	4.78603168353095	3.38495560697664	3.41336065641044	6.87996447594899	4.14656751994556
1700029P11Rik	0	0	0.0901272285585181	0	0	0	0	0	0.0472225955274659	0.333583767896739	0	7.67380717952914	0
1700030F18Rik	0.558093778330411	0.092005368475537	0.0799090450791301	0.172622640633795	0	0	0	0	0	0.121361781841152	0	6.83700521345708	0.10227995495862
1700030J22Rik	0.498852156978913	0.982553959409802	2.77476912615704	0.855964226909636	0.209397757091309	0.185955090072117	1.71274167273256	0.128658794009123	1.23846249613999	0.686989000873857	0.335197660672136	7.79386078051335	2.08286079580475
1700030K09Rik	3.38774424476266	3.51561407185935	3.55836168513172	2.61499702564497	2.65487067658964	1.62253211904744	3.34921282246746	2.19930481494879	3.47195404442128	3.20312789097811	4.14874356237167	5.53728246121805	3.46181360096749
1700031F05Rik	0	0	0	0	0	0	0	0	0	0	0	2.44618885917025	0
1700034E13Rik	0	0	0	0	0	0	0.442188657303574	0	0.054216965169102	0	0	9.52719907165347	0
1700034J05Rik	0	0	0	0	0	0	0	0	0	0	0	8.39771633565838	0
1700037C18Rik	2.32464194428423	2.35402013072021	3.0256913746219	2.19552118576486	1.67721911712255	0.371874569905188	2.93277066516532	1.83521279609917	2.70988037429754	2.44328947004413	2.62701944728659	6.95665958962592	3.60505405538337
1700037H04Rik	6.75573095176444	4.47509631301353	5.90054383717948	4.45939205871893	2.82229003839475	1.74024478304154	3.42741163724156	2.03182951973692	3.83154165821958	4.49892072655353	4.63785282967787	8.27843958771728	4.89393363509986
1700042G07Rik	0	0	0	0.308976617489281	0	0	0	0	0	0	0	9.36171395242529	0
1700047I17Rik2	5.43239978991113	4.73725417042422	5.70318410155565	5.91942315339202	4.55953717730125	2.41329797433409	6.18801803021238	4.12825382629829	4.15201024803115	5.45600187038951	4.92056053289648	6.74330725517303	6.87864077267616
1700049E17Rik1	0	0.063326155305493	0.373074906251246	0	0	0	0.325320301125453	0	2.16946456228522	0.16587452588482	0.0123665235233509	4.99704428580126	1.90545784872806
1700049E17Rik2	0	0.063326155305493	0.373074906251246	0	0	0	0.325320301125453	0	2.16946456228522	0.16587452588482	0.0123665235233509	4.99704428580126	1.90545784872806
1700056E22Rik	2.91803573127589	1.40339118275305	0.268597282719434	0.801939245234478	0.842221757991363	0.749023181323111	0.588354429417402	1.05192683669757	1.01799324984657	0.794135678609488	1.61073588046277	6.90819521477759	1.02283658830135
1700057G04Rik	0	0	0	1.29528336683021	0	0	0	0	0	0	0.0404730064767983	7.13889013281107	0
1700061G19Rik	0.412381696741077	0.759060620506169	0.713011020968158	1.04623532309185	0.212479501020172	0.0907722963244621	0.918222384842883	0.183526708076501	0.525839398003182	0.853889151591449	0.994064475215311	7.26179761467528	1.35824855220344
1700065D16Rik	0	0	0.288307399086339	0	0	0	0	0	0.177332433422644	0	0.316280870158933	4.45530410734156	0
1700066B19Rik	0.262388040026565	0.453534718774145	0.928891640018708	4.38114641450906	0.184495276259291	0.0703884923777031	0.573116830554497	0.199479007167287	0.528296344125945	0.602875193038296	0.925229094792905	2.17568607495912	0.673638378194265
1700066C05Rik	6.48626606073841	6.42241470113297	6.24574509259113	6.97028380656678	6.12168166265859	5.97257536691169	7.00374544702001	3.91094136664961	5.7130445495118	6.87276860858846	6.65669487616413	7.08254090481618	5.686121119073
1700066M21Rik	3.43953816076007	3.90982022043015	5.45668240963912	3.09898153295203	2.31667110999968	4.42310982727371	3.18051696253953	2.36695001547553	3.22196070808858	3.08721895285155	3.74308769556874	5.09757979495347	3.17865149828759
1700067K01Rik	1.16253761874296	1.3042527590844	1.67251731807751	1.02839381242438	1.3220132823966	0.943282402150423	1.23533333777534	1.44691354117388	1.73984989987654	1.37318034828114	1.53972567038108	6.05056094141736	1.31878772904458
1700067P10Rik	0	0.0523405488805685	0.153890702726244	0	0	0	0.17137023218147	0	0.0385284352543493	0	0	7.67078277490781	0.163510948685387
1700071K01Rik	0	0	0	0	0	0	0	0	0	0	0	4.13720205272677	0
1700074P13Rik	0	0	0	0	0	0	0	0	0	0	0	9.68711759472418	0
1700080E11Rik	0	0	0	0	0	0	0	0	0	0	0	7.9945978131466	0
1700080O16Rik	0	0	0	0	0	0	0	0	0	0	0	5.928013384498	0
1700088E04Rik	1.83423190056213	3.67090972262415	3.56553189833014	2.04163574230172	1.77392650872582	0.285323545199057	4.71210947507481	1.2457510679797	3.8896959399351	1.65259232380095	0.361223537717694	6.48385100217932	4.7743684441016
1700092M07Rik	1.9756428538273	2.37316400681893	1.95133629597612	1.9443094212288	1.41442113094304	0.984740348317973	2.05867755732281	0.448622710437653	2.78222611597634	1.93412380393731	2.33473514941293	9.45288996099094	2.44063245805172
1700093K21Rik	0.747714254862259	0.8703184312934	1.14879087552943	0.292155866069499	0.0522707549731773	0	0.249719428518243	0.331707247405004	0.601813502457917	0.241120640970886	0.125437265086887	9.16891206306078	0.632392737424116
1700094D03Rik	2.77279281827204	3.51423712896611	3.69727407073517	3.15854252999169	2.62859714540478	2.00343663295506	4.87924911505676	2.13585545833315	3.67418073882694	3.2570539991151	4.31335335326952	5.11452878411165	3.81039855325988
1700102P08Rik	0.773493642756679	1.68752698181869	2.14617573508455	1.60016579575748	1.40969903653411	0.582271068353376	1.72658354032558	1.0943354532697	1.4946678261499	1.92499055844787	2.38269585535316	7.65453369448685	1.39072707591304
1700109H08Rik	1.7995346968653	2.60325077201831	3.81056903014019	2.33380317054308	2.35709755002703	1.3466817164249	2.88416569227572	3.22661238579764	2.57138305295282	2.97905406342359	3.1999141020638	7.94813481186807	2.67408872956817
1700113H08Rik	0.555593148280791	0.0438140237375662	0.16948240533217	0.0560445847135294	0.653118365483548	0	0.24694386642124	1.22156070094076	1.46085338813554	0.434883729700881	0.113809048638397	7.48786182384377	0.319280370145117
1700122O11Rik	0	0	0	0	0	0	0	0	0.0129363995000629	0	0	4.64391789258812	0
1700123K08Rik	0.100585426872965	0.119704262164987	0.290827236220285	0	0	0	0.064421437019174	0.0258525562160458	0.0605563008247044	0	0.0326432669278848	5.39821419459166	0.241937984869643
1700123O20Rik	4.82785725345204	5.15844477937303	4.45605456466506	5.05151349884462	3.83203681162468	4.02165767038811	4.5752482426542	2.84995829804735	3.84323997707935	4.44989195407714	4.95598526606445	4.31599619602945	4.99942544860376
1700125H20Rik	0	1.21796207848553	0.418119327698992	0.0359505509159246	0	0	0.0882949895717555	0	0.766629519640579	0.0592013685265819	0.0832532548526709	6.39216707040445	0.0964938831682241
1700129C05Rik	0	0	0	0	0	0	0	0	0	0	0	9.52356709859781	0
1810009A15Rik	6.54899705154885	6.59201154847846	5.70548702780465	6.141222751424	5.80025832482616	5.44755025402631	6.15614105661855	4.71758364599333	5.57044184880229	6.06715391475286	6.75769215236672	6.91737802098392	6.41291263260127
1810009J06Rik	0	0	0	0	0	0	0	0	0.12745822076548	0	0	0.181571588219562	0
1810010H24Rik	3.3564158272051	2.36463006608151	3.16599132571705	2.23947359422277	1.83712484114557	2.16259426935289	6.40035629915288	1.92000884954345	2.58527107994114	2.13441134858129	2.06813212234638	0.937571304483252	4.62776718555492
1810013L24Rik	5.55797194988613	5.18044240747535	5.35475133676072	5.19025199332533	4.7710663133985	4.01129325369976	5.23403608414318	4.65210813615182	4.687782325087	5.20098338409106	5.12127521484103	6.4716466865172	5.1770012554434
1810022K09Rik	8.28015622333722	8.87465206939159	8.03153844818845	8.22566828356582	8.31820155828663	7.14171955691137	8.1218928121006	7.2450232433546	7.6325251794073	8.22037435325768	8.1644204851108	5.52537072729852	8.78310334575775
1810024B03Rik	1.05562897853612	1.30359775945115	1.64925719113044	0.67691097180383	0.851159297753395	0.437459278509228	0.669669547589122	0.80881914836131	0.85662284621379	0.659391059513432	0.935975877622832	3.97836544499427	0.98005983813236
1810030O07Rik	5.18998441965291	5.85345854911718	5.40128921806216	5.02076118720089	4.6242706694221	3.06775691021255	5.38338389982106	3.99972610584378	5.29688464396013	5.45826881080311	5.60945951694616	3.15675304189007	5.47097968598396
1810037I17Rik	7.61721264325218	7.28568124882289	7.52686301300524	8.31305451399083	7.32211785195938	5.13563945084038	7.74018046153309	5.65358008677668	6.72761358025877	7.62276713972008	6.86680928016458	5.8645363035736	8.26150498801572
1810043G02Rik	4.56053723798989	4.98979079396032	5.4347243991059	3.55359935177049	3.4759883678108	1.98274304708371	3.69498403283564	2.46080168547986	4.93904187309706	3.61523569648834	3.52679179220073	4.74677519143681	5.06973105317919
1810046K07Rik	0.0806974895563601	0.324832135520073	0.0850082584125496	1.69503447007222	0	1.52687707930635	0.449842882060136	0	0.0114346045314692	0	2.78168870432904	1.34843132403235	0.561993749903406
1810055G02Rik	4.47445429681186	4.8542156458567	4.64697511137211	4.94442365169765	2.80634488908348	3.77007457532867	3.74198133349758	2.90324500756931	3.61732254128811	4.53757021792628	2.51936776542197	6.84477545559494	4.37021643685104
1810062G17Rik	2.69647060817093	2.60634007556083	0.520863903090349	2.15159634255175	1.07694815125429	1.21370140957136	2.00823193917797	0.453932140681499	4.21061029599806	1.99304140498083	1.38970058068293	0.980060002880766	3.30293780142153
1810065E05Rik	0	0	0	10.7045057926254	0	0	0.0394291897012385	0	0	0	0.244215104867143	3.70235463756778	0
2010003K11Rik	5.2224667499876	3.31516101998569	0	5.10901521505036	0	3.07465605912339	0.0778811589042236	0.193496081089988	0.239448253670423	1.90626101561584	0	1.30188418108582	1.42810647909638
2010005H15Rik	0.72819316910806	1.67949991941399	1.10666177921482	3.66482490691666	0.883305032707166	0.248666275104203	3.24346522232808	0.767211038506969	3.54517807858399	1.78305837784334	1.16347374218675	2.51012223393304	1.54335991734718
2010106E10Rik	0.0378568153772075	0.0300594732882437	0	0.263056228999075	0	0	0	0	0	0	0	0.245593557636142	0
2010109A12Rik	1.79184780368054	1.86702486332823	1.06140297003578	1.26896124110803	0.290649476006237	0.697063949765694	0.913221146207357	0.232960154508154	2.04732358092224	0.425813995493951	1.9685651989528	6.67136281576423	1.86105622930215
2010109I03Rik	1.25364686144133	2.89531427963699	1.91212220830841	7.29749957317334	0.89029042054583	0.453735128010152	1.97598426856139	1.61888781838301	1.27429026779495	5.16299535812905	2.25918669308546	4.56081903329288	1.58398452257452
2010111I01Rik	2.18966197107121	3.48235228186468	3.58735143312573	3.73021660473241	3.11062691980525	1.9245118988345	4.15561841044591	1.91671043768257	2.67090833871381	4.96319469313541	2.3200799196863	3.14419394657747	3.62861944868523
2010300C02Rik	1.48466107785359	1.66250469215668	7.06349820950123	4.96360703533376	0.51763095122534	0.0888736660990152	4.06152144434834	0.138628695927282	4.16005478795384	2.41393749261213	0.674633607548178	2.15653717727462	4.48491037642734
2010315B03Rik	4.57479120557017	4.93160053890257	4.91555136262307	5.55284645721736	3.8592624385323	4.16814139130759	4.59989264369154	3.68640814374876	5.11879726603629	4.81257101594642	5.40870284479661	2.23096377570607	5.55547703204406
2200002D01Rik	3.55466355334119	3.94811532591643	1.1125446200239	10.1501682555627	2.9520768622715	4.61042314515703	5.85767768082372	1.4868119431773	1.4586659218747	5.18892109828205	3.52788446721276	2.05370207474955	4.54944723031065
2200002J24Rik	0	3.41846454181907	0	0.926668868826126	0	0	0.0486486426421432	0	0.0737393961509815	0	0.571471495006302	6.04744852131554	0
2210010C04Rik	0.233829951583293	0.345939207246005	0.643137120379559	0.233352987046322	0.237342118737038	0.060611405618916	0.207507736253416	0.609832140611194	0.28180090616774	0.258944846123143	0.185765974212754	1.46283527251976	0.241141848892845
2210011C24Rik	1.08655369222159	0.457102050738558	1.19427449005368	3.00820372019742	2.66523769046424	0.310424242306694	5.67724017975139	3.16654143855023	0.630097543850076	1.06368541980848	0.663885006534671	3.99862908577543	1.99649006180539
2210016F16Rik	5.19196247446101	4.9637822984394	3.17763717839716	5.36104640597529	5.52392769194421	3.79701501773805	4.31575108770677	3.03093374096867	4.12280448675516	4.42295024967504	4.48444745003534	2.84744710099185	5.01089581010325
2210016L21Rik	4.93195070681094	5.92004995406388	7.51183488715762	5.58972366600814	4.57517617749056	3.512656488227	5.03714727642462	4.48630593251631	5.37351212171433	5.04611271911251	5.50219176352812	2.7172497136696	5.97169052508456
2210407C18Rik	0	0	0	7.21476119145076	5.10723342349015	0	0.164513991878734	0	0	0.116627033656019	0	0	0.486296550909194
2210408I21Rik	2.71202642645305	2.61502719000281	3.47317774053559	1.68831081087484	1.86905094496107	1.00582450458343	2.49271784327296	1.48288185141534	2.51755883076241	1.84127146605232	1.42149682749365	5.24621981566279	2.39957402159568
2210418O10Rik	2.87152550474348	2.74229471117075	3.43086365699368	2.67858043472905	2.21306791777734	2.97064570721839	2.59139842702702	2.23826743063336	2.53307081121696	2.80080695882749	2.54828642644038	2.67074942149985	2.77700678187498
2300002M23Rik	0	0	0.0219207597139111	0	0	0	0	0	0	0	0	0	0.311092472439314
2300003K06Rik	0	0	0	0	0	0	0	0	0	0	0	0	0
2300009A05Rik	5.59514213718369	6.14480851034683	5.49650089354368	5.47659323010892	6.03674171055075	5.10705417625239	5.08185825172169	5.16086673836577	5.88052112310564	4.80245577671575	5.12418674987039	7.0015213700117	5.87192857100463
2310002L09Rik	0.0704939300508252	0	0	0	5.94226970561483	0	0.0830278551807867	7.56254888156217	0	5.1312866128924	0	0	5.23335826041415
2310007B03Rik	0.0458782337970753	0	0.0616660436699628	2.4086653131373	0	0.0836053541702246	5.20102339265391	0	0.104946959459601	3.65683158053982	0	0.0113891733238352	3.46384189267822
2310009A05Rik	5.9044079640776	6.37489037880467	5.3632679092695	6.21740113053511	5.71839430439267	5.00503885342516	5.51081658860935	4.88563873772372	5.77835023771986	5.76560962556035	5.66679571798322	4.54004222064016	5.97341799785289
2310009B15Rik	4.83489719568611	5.51190680431402	5.43417840222235	4.7814032299263	4.69442234505938	3.64322457065805	4.58564812458923	5.12106654385152	5.62082171908465	5.05340972892006	4.69033980793597	3.22112914575406	5.15575355066912
2310011J03Rik	5.51342435308055	5.55558623768747	5.20647193009893	5.02036442984593	4.16888677565692	3.32064500213023	5.13131567849263	3.03423871329219	4.16884042687045	5.10287168171519	5.27797924074553	2.94917390836452	5.20683015814269
2310022A10Rik	3.4304634551819	3.86124085764739	4.45697634989699	3.39535523996412	5.27785341698149	1.68570045563099	3.14546156103903	5.91054914257769	3.46290210968131	4.77151157150173	4.06482930028401	3.83184441244008	4.13482137487027
2310022B05Rik	4.83617963529756	5.10832924356199	5.96817491025927	4.87355571572512	4.75132288544486	2.89438782713201	5.17855110994953	3.14710558862044	3.39675659960758	5.67477382489111	4.99044439523846	3.49345154475565	4.20704199917119
2310030G06Rik	2.09193637827838	4.24507587496008	2.69762122908459	5.11288947809521	3.29216676349594	4.59355439205928	5.40740663678063	2.42259879614441	5.24411496803092	4.7333461393994	1.12506928984907	2.3860439976397	6.16796080663514
2310033P09Rik	4.84288476525326	5.4056697860822	4.90902664951302	4.56135638740583	4.06615940510413	2.90319195823218	4.75400748069277	2.23358206313471	4.38787955670836	4.74177570233016	5.25685995360081	4.06458124410488	5.07298092315352
2310034C09Rik	0	0	0	0	0	0	0	0	0	0	0	0.0889627800928966	0
2310039H08Rik	5.48042643445979	6.16572987909668	3.27457274902833	5.53272837271912	4.95482308616098	5.56951985409679	4.43243373376906	5.01150130164955	5.42859023636076	5.00499588080917	4.55686871569459	5.2468111021002	5.36809673923152
2310050C09Rik	0	0	0	0	0	0	0	0	0	8.729443947186	0	0	0
2310057J18Rik	0	0	0	0	0	0	0	0	0	0	0	0.275035288284116	0.0582769371316801
2310057M21Rik	2.31018303061587	2.80360614445138	4.07367127522876	2.05907402360495	2.78515331166655	0.766666918167755	2.46147092018164	2.94968416201648	2.78621372214201	2.91327683853517	2.40596697828602	3.35191420942592	2.80530214399705
2310057N15Rik	0	0	0.0370474892228292	0	0	0.0432371230008278	0.0640773984578589	0	0	0	0.0591301403263287	0.48366331946714	0
2310061I04Rik	5.65489453932889	5.90380921833495	6.6378622694497	6.59470783831125	6.85361188454186	4.94304604261409	4.93752413740633	6.29635702804081	4.93040268625333	5.28540368757909	5.45317975443892	7.05104800929079	6.53438037787893
2310061N02Rik	0	0	0	0	0	0	0	0	0	0	0	0.17584257243145	0
2310079G19Rik	0	0	0	0.0950474129643999	0	0	0	0	0.0113418641692893	0	0	0.164149117579724	0
2410002F23Rik	5.15341209572451	6.5877679833874	6.30247679351062	5.85696129459962	4.21837421717849	3.10039048340178	5.05361496335008	3.21640752514936	6.66802857612899	5.69465949976148	6.38311425409313	5.17642256207659	5.66373611734282
2410004B18Rik	4.3873670597292	4.55682292162397	5.43216357241451	4.2840439690336	4.97433598578224	2.15161200705343	4.58960034401381	4.787315966915	3.60607411150581	4.69367924161811	4.34169410843064	3.77538718601681	4.0234415829111
2410004P03Rik	0.95032209359043	0.962132319018612	3.16030086784491	1.90632379156049	0.894815511204271	0.519930666309727	4.72405250809973	0.538706859414601	1.1041487661383	2.15303265888125	1.30564028805275	2.76865771095006	1.28040127264172
2410015M20Rik	7.44985832064542	7.56472801342337	6.96041562128123	7.36338933887432	7.9485908111077	6.65380941266894	6.29770228317451	6.29347010249608	6.20356445312567	6.91384229265412	6.5162249276231	8.43585938938794	7.5965655356638
2410124H12Rik	0	0	0	0	0	0	0	0	0	0.475851617706933	0	0	0
2410131K14Rik	3.49688093275063	3.17272399862264	4.08157664743572	2.66613927128079	3.04861276547341	1.88425923342977	2.72018795434547	2.7267461710932	3.58554915325003	3.01179760808168	2.98295656202135	1.93019671784672	3.07774775135939
2410137M14Rik	0.0785933943723936	0	0.81345505302919	0	1.06062259901132	0	0.493091385670096	0.932902150153813	0	1.07120762743993	0.202155177288323	1.82892018829255	0.215461308405287
2410141K09Rik	0.732879435945959	0.525355372758592	0.764196429913364	0.632246841421798	0.429049995429836	0.24298544256774	0.656313945338878	0.29088685026069	0.660335412332464	0.703321233548646	1.1770013502983	4.93353047242594	0.502276292335109
2510002D24Rik	4.70325209509343	4.76816525993703	5.08643916796943	5.45227713428582	4.81776313721124	4.21718181822591	4.79431900482251	4.63218081780616	4.84807349146424	5.78344015040294	5.48656859585037	2.76111865473423	5.59238164347116
2510009E07Rik	4.50441692404098	4.01870634503734	5.3565017784437	4.64949916162403	3.44386044042768	2.13705404787304	4.54155800972392	4.15306893080748	4.28904905621896	4.52338370168563	3.08653875119334	1.00531039096286	4.54818396119019
2510039O18Rik	5.24903486499885	5.208163307419	4.52079846643228	5.97418842148447	4.51028986690429	3.68709545577325	5.1260889870608	3.7062989886688	4.74118471906731	5.26646390655643	5.53748306836094	4.38200689496564	5.73835431908269
2610001J05Rik	4.66733745319441	4.91585602531817	4.51437378898585	4.58646590963857	4.76870378454254	3.01559677313916	4.97032872706739	4.10021257197569	4.63937596025681	4.78502873902809	4.38982583870888	2.45117216591294	4.94696250589099
2610002M06Rik	3.3105959549835	3.90450501965608	5.49794711746531	4.10639419497621	2.39570971913316	3.05988457108332	3.60630102585202	2.67995087653232	4.06620218109332	3.26955997907668	3.67947969250937	1.86989943109692	4.38102991629812
2610008E11Rik	3.89590853308	4.50334961947569	4.9553263495835	3.66157037268367	4.32798175556477	2.66652606123606	4.41208164515623	3.67480663998632	4.80427247016388	4.54555557138338	4.32082578651243	2.57525333524315	4.3219734669846
2610028H24Rik	0.0924455726462215	0.0669810649717861	0.274681892269977	0.210923444007898	0.36230788276474	0	5.18476494314512	0.0841123222423274	0.310687246656312	0.687043501294483	0	0.818884632205647	2.38298914826969
2610042L04Rik	1.02782104802894	0.367267185611597	1.97568609008719	0.445558104506125	0.89404237582376	0	0.280627624495726	0.372054842775999	1.98185257741515	0.453522500512452	0.398019771723173	2.78452273330156	0.450330353261722
2610044O15Rik8	4.56941266903292	4.94920105391414	5.40226290821774	4.40825515369305	4.94945994680395	2.93312184188484	4.72963234220882	4.55181167701099	4.68840688053125	4.85775296728909	5.0755921444002	3.22394604840518	4.87972902433685
2610301B20Rik	4.40922205294337	5.78361253444574	6.21777737527476	4.00102684615501	3.88730656941829	2.5926216151834	4.90496942547772	2.95189020599534	5.66026202285854	3.84316330728415	3.87165285956403	6.49443786245393	5.6228818034496
2610318N02Rik	0.384840711544877	0.978257170414566	1.39573736822116	2.38122851895651	0.0736636418796866	0.0517712520023388	0.518823967637832	0	1.51275234936065	0.297139261174486	2.95550024927657	10.0935852760711	0.53271268390396
2610507B11Rik	6.3841886267344	6.20874930127841	6.76319756857415	6.37619041191286	6.44165728957774	5.08214766855463	5.7472980563646	7.01405046091231	5.1449263498059	6.2998799441226	6.06648570970058	6.85126821903959	6.41622253843957
2610524H06Rik	4.14130839985298	5.02973800615419	5.87827198731513	3.8204438542332	3.40493947107042	2.0139735426591	4.33295364149437	2.36242776114992	5.66781981444563	4.67670778419803	6.1254204902847	5.85011120765654	4.93851580469479
2610528A11Rik	1.19184097086764	0.691908484525042	1.26595457691458	10.1094139218246	0.188932429721596	0.165408376053096	0.582132063885682	0.575288296405362	0.122505276904101	1.0949934784985	3.03110285101492	6.04816089631008	0.673035034551543
2610528J11Rik	0.0469899307219291	0.0344484193274373	0	6.85591967817111	0	4.27358636349444	4.44475431298962	0	2.20559747524715	4.49112530175625	1.04270907802814	0	5.62437127422653
2700049A03Rik	1.9787323551246	3.29015463845673	2.76381279631676	2.42267574320305	1.67358783390543	1.01737662324517	2.4036783623367	1.65513933850246	2.62057695983463	2.5230735748131	2.80465401846739	5.88357728996204	2.56328933257108
2700062C07Rik	5.2770972677991	5.58054999548921	5.60280366040482	4.77496971026404	4.02623422344159	3.71781446017396	4.95863577086273	2.87714106142467	5.12612827506933	4.93037242424162	5.06622563896535	5.33984898868892	5.31933530533156
2700081O15Rik	5.19471803654142	3.9969383772517	4.54931332552955	3.19102011356233	3.4936559685178	0.851531150974208	3.88199725493032	2.38803683709278	4.06002849212272	3.83435137539869	2.99009194959677	1.18775040986136	4.6605076123181
2700097O09Rik	3.1055805435373	4.06298481313237	3.46354239739106	3.5179024055085	4.06892166345406	2.76347864980458	3.11513747144405	3.20369534843419	3.16586696001695	3.29191844624158	3.34377806721077	1.49923834123504	3.95217403135693
2810004N23Rik	4.99747331095725	5.49580999487669	4.72772846526585	5.00622712796156	5.99688631068823	4.71654104135338	4.60360550848945	5.20103790494138	4.44316255394036	5.06234318335617	5.29626773758803	4.92513910431227	5.33820693742614
2810006K23Rik	4.54877266103305	4.93088047594946	4.71890536766839	3.87634778233678	4.30862932799521	3.56778614479854	4.0152690760133	3.74618443140511	4.01222302026031	4.30726920992628	4.40818552514317	3.57846615443712	4.16473154981129
2810021J22Rik	2.14117185268083	2.74410026923932	3.12783647826262	2.31837646627661	1.49294668304189	1.13647395523934	2.36372551817605	1.0871574377185	2.87712525155639	2.25805758694188	2.97788547822532	2.79004617048339	2.68525823857633
2810408A11Rik	1.31135886959279	0.834661676175055	0.869613162409265	2.75901883914478	0.651038922645372	0.15320708571731	1.43368691414634	0.352452240426295	2.05243985685175	1.72280766085248	1.87587250565877	8.31141870595224	1.93023204923624
2810459M11Rik	1.65636594461904	0.235375768701974	3.55581352156309	4.10285226624119	0.0274717190361404	5.13164558513933	0.470675473813413	0.093508912481457	0.279294368815748	0.282938955314864	0.142178787319008	0.277231389123789	0.883595549392367
2900011O08Rik	0	1.87360566965389	8.19115334917054	1.16648608322949	0.0233991008841163	0.0323031145051508	0.0551304222696841	0.0100349876085159	1.52712371770404	0.0519516642819935	0.0244503219022593	4.39865308355512	0.0658802098037909
2900026A02Rik	3.58804638557611	3.07532181490956	4.76580956871354	5.3621510700786	2.85444496075243	3.89750318446223	3.81088277638308	3.63510020488875	3.53286001340261	4.81869766421338	2.53572176248822	1.61038587178687	4.79371591002379
2900092C05Rik	0	0	0	0	0	0	0	0	0	0	0	7.56647671324087	0
3110009E18Rik	3.45381540175722	3.62531923966128	3.06132957678893	2.89279111092658	3.26816516575657	1.52422593620954	3.3183068213818	2.74952153566607	3.21542552225047	3.62741670144922	4.33204779384511	3.90836336242839	3.32344086540261
3110040N11Rik	5.52691890228815	5.54133487233651	4.78399323316183	5.38471066652423	5.22605771848442	4.2461039920344	4.65514017346488	4.5288801575601	5.32826662418468	5.2897767478399	5.16850572199745	3.64377658299977	5.40682842437233
3110082I17Rik	3.03027244512788	4.09954463662128	3.97897026168058	3.39624679647479	2.78618152697111	1.97810381942327	3.62838715523389	2.95363625769006	4.00651879028973	3.66912752119301	3.43488809166754	3.72359863477245	3.43570604179539
3110082J24Rik	0	0	2.70205139876412	0	0	0	0	0	0.157801112739649	0	0	0.200849176326159	0
3300002I08Rik	2.11514166352562	2.36658427484111	2.22669692832756	0.519208187014469	0.590995107458079	0.366575250935031	1.06584079827936	0.677482906103141	0.840080084833249	1.22478961408939	1.49700703801181	1.55176444974692	1.66801194339988
3425401B19Rik	0.432790863188428	0.163398457618125	0.432926622508409	0.45750304193055	5.05741847791409	0.629549046528892	0.67429729060731	6.74492453032253	0.60495051812609	4.22124324173308	0.67301059000187	0.421953593904061	3.64724300175263
3830403N18Rik	1.59043564718229	0.70708260750365	0.649640103182825	3.12397153461285	2.78678490285825	0.240471173078029	1.67070111085877	0.428070213245553	0.64534280855578	1.12324191977802	1.98658874843829	4.2061396611731	0.49625848863752
3830406C13Rik	5.60164255025129	5.72458216410001	5.44382939268231	5.34376528525488	4.72204686577056	3.73374803106496	5.32838927917934	4.06555812677628	4.5057640517324	5.70065173450456	5.18436929374305	6.35210352879893	5.93640867229678
3830417A13Rik	0.178834043375756	0.022881373170902	0	0	0	0	0	0	0	0	0	4.57197415821991	0.173660145559039
4430402I18Rik	3.63544571737398	1.63264174016963	2.93057610183366	1.00655970482737	3.64639302946795	1.66874060753243	3.17902882691363	0.918682971116298	1.73658492740711	1.06022475602436	0.473006279734572	8.45706699737331	2.14911497468017
4833420G17Rik	4.41337799854474	5.11742438307894	4.99689121946454	4.95019936950537	4.04619463212243	3.50269531321993	4.94725217733719	3.51233163301262	5.03349710347474	5.1979533975042	5.72357523165703	4.80566398080517	4.77650412254234
4833423E24Rik	0	0.61282317669603	0.399035955607224	0.153474059096739	0	0	0.176830037280835	0	0.931849536969653	6.21225922465055	0	0	0.0635206191086921
4833427G06Rik	0	0.840433982214401	0.837735809390554	0	0	0	5.41095159391296	0	0.190417795013504	0	0	7.63441275755577	0
4833439L19Rik	6.78609341998813	7.3397846488412	7.15238928907866	7.39581955455417	6.36927262205999	5.1595894826967	6.51404263394987	7.8676832572213	5.53950410262859	6.889347647881	5.61396911594499	5.57702482849172	8.65127874087915
4921501E09Rik	0	0	0	0	0	0	0	0	0	0	0	5.10849519193973	0
4921504E06Rik	0	0.108429965007412	0	0	0.0444651837924111	0	0.166303818711217	0	0.0886758570423253	0.159977326956631	0.0464068712117374	5.93625622671724	0
4921507P07Rik	1.22830335222538	0.721460875958119	1.19296716645239	1.35724771741537	0.800091007587386	0.378113229935117	1.53129392796318	0.999694376167632	1.82183032296885	0.997792533696536	1.23403379914877	8.97692261675192	2.85973853352103
4921509C19Rik	0	0	0	0	0.0103021339387302	0	0.0228343762947156	0	0	0	0	5.48709216715146	0
4921511M17Rik	0	0	0	0	0	0	0	0	0	0	0	5.03198717171124	0
4921517D22Rik	0	0	0	0	0	0	0	0	0	0	0.0282291071927892	4.56844925992539	0
4921524J17Rik	4.71871594956502	5.84342838246705	4.89563805789724	4.4548515459606	5.58982608587	3.35148083415973	4.88465436854495	4.94944162082129	3.76274168113186	4.66514692142842	4.75582215904884	5.66898552211437	4.6129979160535
4921524L21Rik	0	0	0	0	0	0	0	0	0	0	0	6.31662451184965	0
4921530L21Rik	0	0	0.121547602866329	0	0	0	0	0	0	0	0	7.37558113357308	0
4921536K21Rik	0.985569166434239	1.0893303577492	1.01669605882016	1.93496423949593	0.90587192804131	0.270537904708627	1.03721954658652	0.276908804173792	1.36621210462754	1.36857816804115	0.632171554706958	6.17892134395642	0.993341071439629
4921539E11Rik	0	0	0.0610098768896971	0.111388276527577	0	0	0.0467497446024791	0.0186749870490316	0.0365092536167707	0	0.0168209584222318	7.34846195205764	0.0525735651284495
4922502D21Rik	0	0	0	0	0	0	0.0482803226261684	0	0	0	0	10.6739155140338	0
4930402F06Rik	0	0	0	0	0	0	0	0	0	0	0.0267184568096492	3.65943454727763	0
4930402H24Rik	5.75839271809241	4.00755762551086	6.1157522091164	4.32236820087772	4.22244141838584	3.16491802779192	4.74332482573376	1.79283613932074	3.9727040988448	3.56504199534326	3.42434890104828	5.04324433622019	4.38797993014758
4930402K13Rik	0	0	0	0	0	0	0	0	0	0	0	4.18436217863134	0
4930404N11Rik	0	0.261368029488593	0	0.979266015398847	0	0	1.35759288132161	0	0.240671230308848	0.366644063037508	0.0604016538774299	6.95645216678381	0.182104822644566
4930407I10Rik	0	0.0048645879270482	0	0	0	0	0	0	0.00317319647450812	0	0	7.42161575387438	0
4930415L06Rik	0	0	0	0	0	0	0	0	0	0	0	1.74575279054224	0
4930415O20Rik	2.17363418254902	1.99904808603726	2.04841399467727	4.10944048503092	2.11296931273286	0.46872455736301	1.44903728106334	0.676279484036917	3.23839600957415	2.22994198377056	0.57857608575141	7.74131214219648	3.25143427822965
4930426D05Rik	0.579982126045228	7.24190218739239	1.65157338197233	0.233192114576315	0.15028700232648	0.0641345846755693	1.29025868845056	0.0258391596690703	0.171133642353377	2.34301131119676	5.62403285232018	2.57489317602576	7.37589683888361
4930430A15Rik	0	0	0	0	0	0	0.18610280762956	0	0	0	0	6.84986737645119	0
4930430F08Rik	3.36985785176268	4.30242294641829	5.0134772730165	2.98206833756914	3.18352580333653	2.52821301317455	3.52015657094406	3.71830461193994	3.75154070652323	4.16471673152952	3.46387582195925	5.29061458248949	3.86157268151728
4930432K21Rik	0.372428617746143	0.545448274417113	1.80591768003613	0.332463703311499	0.347559529045464	0.0278808258424619	0.639902860523976	0.407192536401061	0.597213424961951	0.621834204297885	1.26323607203802	5.82298160483383	0.512947632385158
4930432M17Rik	0	0	0	0	0	0.0379642895800571	0.0208958755733716	0	0	0	0	0	0
4930433I11Rik	0	0	0	0	0	0	0	0	0	0	0	5.14425776057221	0
4930435E12Rik	0	0	0	0.0266068634193312	0	0	0	0	0	0	0	6.99620032572326	0
4930444G20Rik	0	0.016074653465171	0.0796764366953303	0.0216396646502021	0	0	0	0	0	0	0.0572651384829919	4.90218825562612	0.0420551602041414
4930444P10Rik	0.625286834269184	0.416546073030556	1.59342057864625	0.257382350759322	0.472746569933247	0.166736348572179	1.59792652680852	0.189883790885468	1.69246210157714	0.685813210252705	1.02211559639677	6.80680917385122	0.522196969352647
4930447A16Rik	0	0	0.246283679193254	0.0861158339473052	0	0	0.116001693419807	0	0	0	0	2.23318519950135	0
4930447C04Rik	0.596868344882192	0.63847180062778	4.93612965921646	0.515931460774299	0.277102123376985	0	0.0194030711386014	0.461913149054096	7.27879391022395	0.329589333365072	0.243041704417164	5.75431758379013	1.21396587032343
4930449I24Rik	0	0	0	0	0	0	0.0313972434809268	0	0	0	0	5.61082793569993	0
4930451G09Rik	0	0	0	0	0	0	0	0	0	0	0	0	0
4930451I11Rik	0	0	0.641726651500022	0	0	0	0	0	0.120125618476747	0	0	7.06306805197992	0
4930452B06Rik	0.153318972597023	1.59309799005495	3.68369118385897	1.2150061194083	1.42520327830534	0.856672590783438	1.53057036677516	0.0764926609456426	2.84598659355304	0.28854023257135	0.118757396913705	3.64858969475337	4.25900770413213
4930453H23Rik	0	0.0401001940656423	0.0770216164762889	0	0	0	0.0184061609166319	0	0.0274945717384611	0	0.0278476483277811	5.91317975635793	0.0653018085880981
4930453N24Rik	5.8584314631796	6.04700636158283	5.48208520902359	5.62065503151623	6.04889866677371	4.85290510631103	5.73271017232677	6.8244168449948	4.80646472638882	5.95568997958231	5.96271385114891	10.5890977678985	5.88213025470205
4930467E23Rik	0	0	0.971490380641921	0	0.0492371040708618	0	0	0	0	0.0970991849522289	0	5.36459517311645	0
4930474N05Rik	0	0	0.122380290591887	0	0	0	0	0	0	0	0	5.40003343570399	0
4930480E11Rik	0	0	0	0	0	0	0	0	0	0	0	4.14708371483353	0
4930486L24Rik	2.844932876798	4.38166505859152	0.381075041195286	0.695062833495799	2.29304822937403	0.402983377183983	3.30977407178559	0.93267845971294	0.479959793319295	2.02892962447187	2.62375332930747	1.52867385835978	0.75336465052471
4930502E18Rik	0.219057162580123	0.461032942209337	1.38029904072047	0.172879170172296	0.158058890505771	0.0501562882444873	0.414305235788361	0.0477017629038202	0.517992511228683	0.869315611759618	0.213904500389348	3.67853073751373	0.112514317390531
4930503B20Rik	0.355911448969099	0.671625061297894	0.395903180150636	1.25068985900567	1.53467760064316	0	0.50593713359116	0.852417587955291	0.37879886946394	0.786360436223375	0.210511334678614	9.45298754146604	0.819619027655721
4930503E14Rik	0	0.294782981228924	0.108896489172551	0	0	0	0.447706494961419	0	1.69801611059379	0.291517084732126	0	5.01896674435007	1.95932094014131
4930503L19Rik	3.92956656045551	3.96442608783013	4.31940847511512	2.74401396708881	4.01759433610516	1.7912088324817	4.93792112930124	2.32274930773065	3.75430710253582	3.51154735762909	4.8479495426307	6.96379860814576	3.33406179527114
4930504O13Rik	0	0	0	0	0	0	0	0	0	0	0	7.62582167528268	0
4930505A04Rik	1.74717732239251	0.790844624517061	1.49346141779543	0.0982619754027323	0.148832923339865	0	1.66151264018496	0.0490262168979326	2.42309409838825	0.981982967210725	0.0929454874997718	8.46132428146457	0.950685044303039
4930512M02Rik	1.14172693392543	1.62272037046043	3.09249238910048	1.77086058111248	1.41580631266359	1.36648250357893	1.76212756098645	1.0581544637983	1.77993630906913	2.0264070847833	2.78846237050992	5.7770649557101	1.56467785945144
4930513O06Rik	0	0	0	0	0	0.691934744169458	0	0	0.0794318962309484	0	0	5.19582824505349	0
4930519F16Rik	0	0	1.01444114104076	0	0	0	0.0637868531822622	0	0.188674051147667	1.23474804334683	0	4.44390106440166	0
4930519G04Rik	0.822598451337279	1.06503208865603	1.41546246732954	1.22987258627156	0.795538172335994	0.60205295131954	1.29103114908904	0.523045660967349	1.13727065358043	1.25159370476379	1.67653318318619	5.48852017541854	1.30360421657601
4930519L02Rik	0.999059849142202	1.33765991073705	3.81367421768963	2.37928817764267	1.48460184972161	2.54115871719768	2.34715303946092	0.95917152893721	3.14780356581341	2.23346767164433	2.39071311305003	6.34812345789154	1.05054356911019
4930522H14Rik	0.0445484445550476	0	0	0	0	0	0	0	0	0	0	7.67334629143646	0
4930523C07Rik	4.42769804253341	3.1477340073543	1.25617292696907	3.90813002096632	3.90527744992312	2.56251673022445	5.58418527046656	1.72294663493713	0.889622860308067	4.79666881169657	6.25479225035025	3.41050157435367	5.26128715685877
4930524B15Rik	0.0440110029868255	0	0.486727190118912	0	0	0	0.083798276621871	0	0.133803227420854	0	0	6.10154322941758	0
4930524N10Rik	0	0	0	0	0	0	0	0	0	0	0	4.78790677639289	0
4930539E08Rik	0.767806571458715	0.895458906750745	2.95574553810505	5.87883712817481	0.543380312627294	0.666525783766439	1.01266303193031	0.30703336265603	0.896649132205539	1.07465701814676	1.43532811481584	2.52706103315232	2.08167672596016
4930544D05Rik	0.0715845886317996	0.0652538361116188	0.0954726019725368	0	0	0.179586241668174	0.357057291329305	3.87162297145661	0.117712786138731	1.58493579853029	1.21776248887912	8.54790592885496	1.7521453827729
4930544G11Rik	0	0	0	0	0	0	0	0.0285625871787776	0	0	0	8.53645761502955	0.0316672244189878
4930548H24Rik	0.0636428146691834	0.048155244870121	0.0482565216755809	0	0	0	0.120772495192449	0	0.0590881691252165	0	0.236873629678358	4.77184954546649	0
4930550C14Rik	1.71028795303756	3.14692180392223	0.908711685410331	1.12351453263181	0.722037269958758	0.155095172712587	2.4284233193193	0.455249512551152	2.71526432057222	2.19182181246397	1.43385612379686	6.71316575399744	1.7800178986537
4930550L24Rik	0.0249052802364414	0	0	0	0	0	0.0452387060580809	0	0.0193864880129572	0	0	4.93628597170243	0
4930555G01Rik	0.337271466906199	0.124481540607379	0.372575012644407	0	0.552885410527353	0	0.0644370430542087	0.153740783104522	0.317649458601412	0.0773554310152084	0.0896833159003931	4.33097562669518	0.101351526778345
4930558K02Rik	0.0635859054230364	0	0.167955859271261	0	0	0	0.158607357365466	0	0	0	0.177202700361118	5.74564357646546	0
4930562C15Rik	0.194017964815893	0.224082822284697	0.410459539625696	0.579686127292142	0.094381756108242	0.00886248064417418	2.80459266676364	0.0497268042678228	0.440467613022951	0.640661817041585	0.266857999486636	5.78581370884332	1.178817304516
4930563E22Rik	0.581888377621196	1.57441237979011	2.30911174442713	0.854221819730804	0.708837849082041	0.460267189514314	0.925723517934865	0.683674503943404	1.78814671533251	1.0167509538272	0.935175964373307	2.90669505257619	1.4691976409443
4930563M21Rik	0.208905175698444	0.322379255634279	0.588751990494726	0.3251952529121	0	0	0.393956753991903	0.0505875031677801	1.20740209542879	0.0972718602629551	0.387322591738296	7.10817253590094	0.836360526216999
4930564C03Rik	0	0	0	0	0	0	0	0	0	0	0	6.71570697052645	0
4930564D02Rik	0	0	0	0	0	0	0	0	0	0	0	3.09988606230539	0
4930567H17Rik	0	0	0	0	0	0	0	0	0	0	0	4.13409131641658	0
4930568D16Rik	0	0	0	0	0	0	0	0	0	0	0	4.93374764813364	0
4930571K23Rik	0	0	0	0	0	0	0	0	0	0	0	9.48105014150175	0
4930578C19Rik	0.471282936769056	0	0.0631769593918733	0.0245750643382581	0.560275833202891	0	0.829422443898462	0.18407470404885	0	0.283290802812696	0	0	0.137973530139132
4930578I06Rik	0	0	0	0	0	0	0.0382612907545391	0	0	0.833938046947226	0	7.97900765931921	0
4930579F01Rik	0.0733268166600764	0	0.0212321831177119	0.0420205812945032	0.107110237541269	0.0655766693236111	0	0	0	0.0505090947152517	0	6.99783961221681	0.191340936896003
4930579G24Rik	3.0616195206226	2.65372164615429	2.32957080455884	2.54534014220674	2.14559824426692	1.12933303966718	2.23380444428942	2.13059273801981	2.92889018184552	2.78309075093505	3.53089779257006	6.04330925809664	2.33413823351403
4930583I09Rik	0	0	0.0747514282961143	0	0	0	0	0	0.727401029741727	0	0	0.700849117112222	0
4930590J08Rik	0.136306656324316	0.383673645899495	0.606849913435142	0.107618367138159	0.0714173540345887	0.038596560432508	0.280494485443975	0.184216286182396	0.194742670987447	0.218976676257208	0.149944641984002	6.67746597900048	0.136705344769113
4930591A17Rik	0	0	0	0	0	0	0	0	0	0	0	4.48458964049903	0
4930595M18Rik	0	0	0	0	0	0	0	0	0	0	0	4.04604397118943	0
4930596D02Rik	0	0	0	0	0	0	0	0	0	0	0	6.18723541974743	0
4931406B18Rik	0.251933401270674	0.337992503819311	1.1161000946402	0.373543304709969	0.277779338929767	0.183963926333763	0.40755336386693	0.154981075269363	0.389927399592487	0.3945050769051	0.608251154776139	3.5842036076716	0.461160073198463
4931406C07Rik	7.33321996152038	7.06971424548019	4.9591606097217	7.47931660037131	3.24104962809734	7.13605723134919	5.15126009717325	2.88440286911475	4.5988888923922	4.65790318629789	4.28014895496693	4.64503617222976	6.30121751016922
4931406P16Rik	4.97144008677188	4.53625932089059	4.52167364699562	3.87633082684877	4.20536149070413	2.51918771976231	5.75086653211902	4.13049848841008	3.57383880676717	4.55007534199546	4.4168241794912	3.88012814490996	4.73806612805315
4931408C20Rik	0	0	0	0	0	0	0	0	0	0	0.103456203955445	4.75227552506155	0
4931409K22Rik	0	0	0.126841779682418	0	0	0	0.00765414608215991	0	0.014410525285513	0	0	5.99042601384757	0.0202982356970012
4931414P19Rik	2.55763583200517	2.53544535047233	2.32723408659737	3.17688655167824	2.15215434706055	1.69740848528601	2.62913011931299	1.91225697082615	2.6240446896358	2.75540795379665	2.65985408053403	1.57937086436606	2.89695043142278
4931417E11Rik	0	0	0	0	0	0	0	0	0	0	0	6.49063970571845	0
4931422A03Rik	0.535993367854283	0.943621324983336	1.67800792784729	0.553053347656147	0.766889102996085	0.523719167914225	0.814401213459107	0.366523742927294	0.90925429135088	0.760754370278469	1.20899390077982	5.69460018836457	0.809845582278146
4931423N10Rik	0.0154826591849289	0.174860444318797	0.533846030425405	0.0494509046690233	0	0	0.0430097744298655	0.0790597027213331	0.0829414796920333	0.0619956247838682	0.134935232119732	6.04228240693822	0.126367156432636
4931428F04Rik	1.8015846761809	2.56471695133971	4.5270913780079	2.63092301860434	1.3411742899882	1.47911687581097	2.07281900018069	1.01294044822753	3.90481272624362	2.35459713279339	3.12817668340368	5.8247776950132	2.98167975310584
4931429L15Rik	0.292749805740064	0.390214604370573	1.08333705781726	0.262412744060885	0.250200597052575	0.104428785619401	0.255406862208662	0.0738567883132033	0.585876403211955	0.626309100857915	0.42371950330263	6.9779189620871	0.211597260805019
4931440F15Rik	0.0615259598335023	0.110038379818192	0.68131106848097	0.771713636139228	0.0892462083738595	0.0531248890499367	0.0979072762062156	0.352956256663652	0.130107340699099	0.216807994379169	0.321075605736396	4.80171096564161	0.127331554039679
4932411N23Rik	0.117351476810735	0.529985963773961	0.446520918157688	0.276685114814964	0.411047472614688	0.0280755400619938	0.363916615194742	0.142460759997055	0.126756138301235	0.311281426191971	0.357060052485066	3.83716672246215	0.352717396353922
4932414N04Rik	0.347260359222545	0.504150033593913	0.876852349510654	0.319541828387273	0.300772460841404	1.37657321958142	0.480030409081962	0.0894831746896374	0.704204255122574	0.512578782564204	0.471481650896964	6.89170772476413	0.512180678066518
4932429P05Rik	0	0	0	0	0	0	0	0	0	0	0	4.21686956218868	0
4932438A13Rik	3.10629314726059	3.55183610758172	5.00703886605182	3.68157791520987	3.10042410903547	2.72341546255365	3.45865570345333	2.70499226446341	3.80015704239075	3.74943952635765	4.41334556048573	5.25491814655094	3.75072120453858
4932438H23Rik	0.450559136885085	0.213566190020998	1.27363075058815	1.4622786099962	0.082132034694137	0.0299423084558103	0.155563966179347	0.0330116288325278	1.83339692543501	0.26882014032733	0.114859265176573	4.28849932697652	3.00256117010536
4933402D24Rik	0.134126789867603	0.213417313384604	1.77909994522758	0.174995486896047	0.121589681770398	0.109056949682334	0.228960349174764	0.279077736688002	0.235322246140959	0.122212904629806	0.213127036875523	3.46868520357655	0.154157172123306
4933402E13Rik	0	0	0	0	0	0	0	0	0	0	0	5.37544490711057	0.958792075121157
4933402J07Rik	0	0	0	0	0	0	0	0	0	0	0	9.29229315898215	0
4933402N03Rik	0	0	0	0	0	0	0	0	0	0	0	5.87682587531285	0
4933402N22Rik	0	0	0	0	0	0	0	0	0	0	0.105865077357293	6.84519234439455	0
4933403O08Rik	0	0.35468941490318	0	0	0	0	0.329228817812161	0	0.0403795750520014	0	0	3.65820608180674	0
4933405L10Rik	0.140103026660577	0.144164607792409	0.722172103110429	0.186079848763001	0.064482984577277	0.0621961674662254	0.25362048782103	0.167866828238913	0.178416528115366	0.314383145284427	0.149417211615864	6.03432729369784	0.170989337655634
4933405O20Rik	0	0	0	0	0	0	0	0	0	0	0	6.69657081270928	0
4933406M09Rik	0.0149782099620806	0	0.0693063039174248	0	0.017552583323356	0	0	0	0	0.0193935198105175	0.0377973638129818	6.07353420246418	0
4933408B17Rik	0.624086359097806	0.966419669741214	1.37982163570794	0.60117209273132	0.482927980665427	0.196807470940185	1.22530384991232	0.22578801803014	1.27420927324953	0.808205370108574	0.937899430675449	4.11859181378037	0.881367567227907
4933409G03Rik	0	0	0	0	0	0	0	0	0	0	0	7.88285353071837	0
4933411K16Rik	0.499721954139304	0.0772109957656333	0.196555445688725	0.360778569835218	0.0749242747711121	2.06193572611392	0.657865497070446	0.171451113288139	0.1003910116091	0.945587667324929	0.165683386793649	10.5590025340256	0.117964652540435
4933412E24Rik	0	0	0	0	0	0	0	0	0	0	0.0170897227059953	4.12010348252444	0
4933415F23Rik	0.0364984447945578	0	0	0	0	0	0.0294940568079871	0.104204373738201	0	0	0	9.05256480262835	0
4933416C03Rik	0	0	0	0	0	0	0	0	0.019573202573018	0	0	7.64500810303079	0
4933416I08Rik	0	0.359798846017489	0.160508351653416	0	0	0	0	0	0.0101291913325116	0	0	3.71902059277076	0
4933417A18Rik	0.470395548884607	0	0	0.383613890579179	0	0.125950845253548	0	0	0	0	0	8.0617384713815	0
4933421I07Rik	0.0556903372182993	0.0633847713449606	0	0.0558558038290266	0	0	0.0474248771511596	0	0	0	0.0244249829952134	4.71239173555488	0.0956148204154615
4933425L06Rik	0.0586017982505218	0	0.0286551816379427	0	0	0	0.0352149124643134	0	0.0348590760450982	0	0.0461167078127775	3.63116484861675	0
4933427D14Rik	1.18962577209507	1.4659576631748	4.55838929444237	1.18745466191519	0.521824940179339	0	1.44913901754531	0.26359329896126	2.40616079464279	1.33344117491317	1.1954681958776	4.40683646050677	2.43639119463673
4933428G20Rik	0.733559979264134	0.708996031171947	3.46880500598911	0.20251545118372	0.561983299610678	0.175454371722035	0.660302195066103	0.295174791159592	0.612380741713888	1.15526246323737	0.669402353658294	4.87064141521618	0.430635456122993
4933428M09Rik	0	0	0	0	0	0	0.210674343562737	0	1.40720809971359	0	0	5.18868232052024	0
4933430I17Rik	0.261816355845442	0.698157833587379	0.722842931400337	0.710606247044584	0.247854557821556	0.0927231627279694	0.460207064003261	0.103914605632427	0.820175156497192	0.48230312939883	0.740347574828642	5.23882738508429	0.514421294188143
4933434E20Rik	5.53402658860947	6.06567698971309	6.13719342773086	5.52654259064682	5.74842465358503	4.51364084628622	5.60879367541513	6.16493571065799	5.64779770329234	5.72838675459135	6.00061176478632	7.09691025585862	6.06755477750337
4933436I01Rik	0	0	0	0	0	0	0	0	0	0	0	5.8650677190789	0
5031410I06Rik	0	0.122405826573837	0.486413180031566	0	0.0964745046297498	0	0	0	0.0827012178980558	0	0	5.3818189568231	0
5031439G07Rik	4.45478713241572	3.84107902974083	6.04561384185589	3.76055164287294	3.39380713385421	2.97566555038789	3.87241778743218	5.67319956706715	3.59471251250662	5.45090531325892	5.36067518564711	5.24782652711675	4.53016291266013
5330417C22Rik	0.0685977111451646	2.06359690895742	4.71384869703567	7.43675339884454	0.0477655898538023	0.317045201725672	5.6878089719204	0.0367794990385618	8.08790515076938	0.22512375865374	1.74736276913722	6.63906942233722	3.32818023476384
5430401F13Rik	0	0	0	0	0	0	0	0	0	0	0	1.2932142779234	0
5430402E10Rik	0	0	0	0	0	0	0	0	0	0	0	1.82295692408058E-06	0
5430419D17Rik	0	0	0.0162329583082331	0	0.102451733202337	0	0.0558239294884409	0	0	0.135782071804318	0	0.16288855941064	0
5430427O19Rik	1.17772788560256	1.38547696625463	1.1991720662318	0.987908701862031	0.931652001093797	0.440312699348243	1.67725704523387	0.473632962207773	0.83739475241327	1.48648774273719	4.14532176687681	1.45225328112624	1.15473413649658
5530400C23Rik	0	0	0	0	0	0	0	0	0	0	0	0	0
5730409E04Rik	4.49320995943424	4.1169989345303	6.2073678405833	2.90567861275467	3.29348306594827	1.96966672479032	3.45562701323455	4.40505938311112	4.06212900994246	4.64583064650643	2.67382999259633	1.68643537862615	3.69390253591754
5730455P16Rik	4.34691217961307	4.75383918255849	6.18653640620401	3.66624694380987	4.37446549764385	3.16203774807118	3.91758050652866	5.78982912847571	4.4048712076425	4.26646566479855	4.02751169571096	3.0264259732092	4.54844914187321
5730507C01Rik	3.11497356776359	2.79653039061499	3.03209302069954	3.5101697157624	2.09406044277969	1.5473953014784	2.97335659494127	0.887747270934173	2.09825038205945	3.03347004523805	2.79718154212749	3.61421499520246	2.52725041691181
5830411N06Rik	0.030312378799656	0.0264155735189618	0.024442639152897	0.037257302165206	0	0.0137940996410693	0.629012843972749	0	0.0211567097998103	1.54481143537008	1.1905679676883	0.237337618325322	0.0749173231155694
5830473C10Rik	0	0	0.256953038055196	0.0749949879937862	0	5.17079620588934	0.0201499355433142	0.0131431000052424	0.0150284590752391	0.355764230188161	0	0.286330540288682	0
6030458C11Rik	3.98873951869241	4.44835600541438	5.48289173899351	4.77909732369709	3.95398114627117	3.2007517269936	4.28619003267004	4.7022018227996	3.98584250521244	4.65951477704661	5.15146033930748	3.13848605158092	4.22698848237871
6030468B19Rik	0.295446282608875	0.384632253399628	0.961309006233511	0.519854047659453	0.490472859841426	0.136234612073729	0.684123187423819	0.171642580110997	0.327539716729579	0.75995599929798	3.25758501143217	0.260222520791854	0.764933529921636
6030498E09Rik	0	0.191073482453351	0.217850670164751	0	0	0.289792395757774	0	0	0	0	0.0730107973375821	1.42321942893766	0
6330403K07Rik	0.152168648214857	4.64878839354125	8.02803974157864	2.85099006246138	0.463229613600167	0.104647655665544	1.7977323677207	0.436379347167547	7.19873229298753	0.953009264260501	0.981808440279615	0.169006442540579	2.00933465488204
6330409D20Rik	1.06816348781765	0.832680361537909	2.3314569410547	0.254546122866681	0.919976690976936	0.223404064886204	2.06906643639684	0.392159195940718	0.411730217349633	0.563215855620484	2.23920328253589	0.273602849409634	0.501747658924393
6430531B16Rik	1.17798354932402	3.55478423328441	1.43213156908327	0.593151501559745	0.714852945056406	0	2.79737264527927	0.408277303123435	1.50403186386685	1.42322120717508	1.32928739509444	6.7524983684425	1.62154975366635
6430548M08Rik	3.12243286764417	5.42727098279009	6.83355935587806	4.85041521176708	2.35933191494712	1.66045171478039	4.65222717567032	2.56303885651157	5.38805367256723	4.50494096047809	3.75326057932895	2.73631775001981	4.10429609082168
6430550D23Rik	2.44759361365941	2.00441584372124	2.32284363402315	1.83567284392836	1.00776399818824	1.23081671787881	1.78268523427917	0.959041112761933	1.97074177040581	1.90977046831067	2.01270759449163	3.67716235473487	2.19081231131845
6430571L13Rik	1.10418751560667	1.07206860651609	2.39956424410695	0.493499198550763	1.91531441591245	0.696339956630571	0.682571146569014	5.36272765418903	1.60782630512412	2.55923130110705	1.00001788969932	1.91859469417635	2.9566221999895
6430628N08Rik	0	0	0.169412281992345	0	0	0	0	0	0	0	0	0.10802141705279	0
6720489N17Rik	2.37699080949421	2.06993038534663	3.27470367920651	2.30155742247732	1.72323462375023	0.574671526525418	2.67190466482003	0.954354938169615	2.15265244419427	2.35232713081592	3.26423064783551	1.30525786450726	2.65427388592145
6820408C15Rik	0.0845253240254609	0.545797296904505	2.15694608959273	0	2.49265805042657	0	3.46965166545199	0	0.671176558790224	0	0.0775011542757996	6.12634797056334	0.961223450220694
7420426K07Rik	0	0	0	0	0	0	0	0	0.0224978404684521	0	0	0.0863865073701789	0
7530416G11Rik	0.499698109687006	0.691506720167697	1.44475215037559	0.627484847123916	0.514039852324271	0.201284333066341	0.843686564881219	0.139354609244759	0.644963801053157	0.611305670094887	1.0613876000005	1.06843170571523	0.480179756291884
8030411F24Rik	0	0	0	0	0	0	0	0	0	0	0	4.67421735469573	0
8030423J24Rik	0	0	0.436749951462667	0	0.0531674916684266	0	0	0	0	0	0	0.457551790449428	0
8030462N17Rik	2.81908790039806	3.74004128675658	4.6393806282797	3.35248539879004	3.80786366918381	2.06870379619537	3.52050772473024	3.71334540893645	3.09126997468182	3.66282189191216	4.07438422292865	3.12917689589796	3.34493141368461
8030474K03Rik	0	0.0197150650220061	0.576750992504027	0	0.134122436314762	0	0.0672302721980971	0.163930494082649	0	0	0.0872165177412588	3.83549350014941	0.0803880451211799
9030025P20Rik	4.47507662785299	5.04727337306702	4.81722059091839	4.38869108786077	3.48908163653854	3.53466297915636	4.55355599353273	2.95319573923691	4.23881802712055	5.13270623354585	5.02224198404995	4.26767412376676	5.00886632288717
9030624G23Rik	1.96884369137098	2.33524554411275	3.33890399451961	2.09100970265932	2.16294561321377	0.649855538575931	2.37347117078067	0.580949092654172	1.08806663815324	1.86398145983602	1.65350507286619	2.25196829826191	2.22735663024397
9130008F23Rik	1.99708017592673	1.29606559418661	0.405853864598257	3.87840754624723	1.06397749913273	0.298140665184861	2.09772129300372	0.461013925986321	0.269500203621922	3.37435782184145	1.905849937816	0.529734987884966	1.20454313089957
9130019O22Rik	1.550806363836	1.95976405206572	1.66687187901659	2.23847592835077	1.18317664806275	0.775550372345537	2.13705778977457	0.990033198962096	1.89040033458929	1.92291147653248	2.2023877728424	0.350952885184591	2.42622954376585
9130023H24Rik	2.50919008380835	2.44354463209179	1.61953724310412	2.53231144739472	1.40863196571571	1.02026725454093	2.1890730329085	1.09176702275328	2.38345945137308	2.59071978839906	2.13723177342925	3.58078748593353	3.25735918987216
9130204L05Rik	0	0.293073954483209	0	0	0	0	0	0	0	4.14350065056011	0	4.39923945204158	0
9130401M01Rik	5.30967021064299	5.36024640028341	5.76142026629952	4.24862654290448	4.54550148286055	3.81397390812525	4.43769047711505	4.23008272871107	4.75018055172956	5.20993421378269	4.83662717120804	2.80076153415966	4.35092547747344
9130409I23Rik	0.106133399019328	0.216276885079327	0.718033158358118	0.276218490898692	0.0446205022964856	3.00599219233524	0.1614516025557	0.0490398554305944	0.174019752826177	0.31190193779752	0.21156476826446	0.808704301982683	0.16702881627494
9230019H11Rik	1.11935009785412	0.289458423049446	0.467050667952505	0.467691643288712	0.213339711144142	0.078903207945081	0.414594635797874	0.127410373492156	0.443303015735282	0.360836330536367	0.610494801705007	0.862937493772144	0.574297811520103
9230104L09Rik	2.11183250205097	1.51711752091255	0	0	0.598253108061471	0	6.24102323534009	0.866636026834111	0	0.556126273142	0	3.98994043942232	0.675921530421202
9230110F15Rik	0	0	0	0	0	0	0	0	0	0	0	0	0
9230112D13Rik	0	0	0	0	0	0	0.0440910353964983	0	0	0	0	0.129525863928382	1.60743222365751
9330159F19Rik	2.88919204400843	3.14566645943499	6.27715514643646	1.94949919857561	1.10594944469098	0.481929384442339	2.20555408372789	4.54973466707225	4.43594768932534	3.38332330014096	1.32797985386818	1.49276600494199	2.86095936225739
9330182L06Rik	0.10266995655955	3.09717164375441	5.19164446112195	1.74881843850829	0.0483658651221671	0.332856872538235	2.45700999944949	0.0764342239097486	5.19522518416484	0.637021155022749	0.446077472469288	0.902584416719584	1.05936979113877
9330182O14Rik	0.0639754709813993	0.105574943471507	0	0.374561125495381	0	0	0	0	0	0	0	0.660972782582647	0
9430007A20Rik	0	0	0	0	0	0	0	0	0	1.978984351047	0	0.0591992742095854	0
9430015G10Rik	2.91285915447783	3.77149234733596	4.63504214570332	3.59147639625882	2.33097972792836	2.13851543942723	3.69567201419071	2.24338963363868	3.90021624460274	4.13110658906069	5.00345583391548	5.69271490360587	3.7377910995841
9430038I01Rik	4.00142425729841	4.01215409323477	3.33703046795308	4.1976786237829	3.64268429179714	3.29459231043949	3.81047205242627	2.69836821249738	2.60666811710167	3.7741034491223	4.23912821387028	2.65089260445424	4.51309841364964
9430069I07Rik	0.756920390666237	0.252170434026299	0	0.179748676042582	0	0	0.321555460638579	0	0	0.325623294899755	1.0075938422064	0.241635277200759	0
9530002B09Rik	0	0	0	0	0	0	0	0	0	0	0	4.22162120767083	0
9530003J23Rik	0	0	0	0	0	0	1.01969261001506	0.124646506580321	0.0901979758007672	0.0722979450978568	0.0337491293224469	0.730719530867286	0.359755320330311
9530053A07Rik	0.0355649533819316	0.113461335856255	0.0693171216521701	0.259287881299809	0.0220143206997967	0.00910636147330489	0.714484145708555	0.00846482878062337	0.668705276592392	0.134028391101559	0.0505043243627996	0.0689091884127089	0.104453889858696
9530068E07Rik	7.31305093560165	7.81079766646974	6.4647913541399	7.2404114744449	6.4325334990671	6.6425484049611	7.0640229233875	6.11858634118777	6.80673532140456	6.75718985469413	6.38550756089281	5.95718077638087	7.92195604684022
9530077C05Rik	0.694090241683	3.88508176545339	3.5833918035433	2.02949833093195	0.536902686342364	0.183609229544166	1.93239711920103	0.404878869065741	4.00749175592165	1.10363141419533	1.22803691772083	6.48986411610136	4.18021336584485
9830107B12Rik	0.268331750091001	0.077215421076737	0.415474363113206	0.155024988456804	0.141391346024421	0.067271336642906	0.317893593261301	0.0418623096646487	0.326783768233674	1.00419497099149	0.813642604007489	0.627875885578578	0.275912022578223
9930012K11Rik	1.78580556486774	2.28420254480676	1.86784400380896	1.76405513722258	1.13488391202167	0.576112868771537	4.15653402571509	0.450380300190665	1.22482021710459	3.98786727588238	2.71813630484031	2.71570867823833	3.52470903979523
9930021J03Rik	2.9881966871167	3.41022413519331	5.06488915714088	4.22631650928663	3.01657253692633	2.7916775421172	3.61029469622009	2.89489063340643	3.09954197279056	4.00408459691581	3.74629880026101	4.6180466477203	3.57752312706111
9930104L06Rik	3.64903104647192	3.9534737661007	4.19708209959409	3.43302336008851	2.78227550374573	1.88362616853334	3.56913287839796	3.17474875245774	3.84540661434619	3.7755845404385	4.00208104293856	2.99267416309204	3.78406154547476
9930111J21Rik1	1.16306728872418	0.961406751687877	1.64026888061768	1.49399472829882	1.66833052032863	0.683246301534076	3.47883547438637	0.426396323582479	0.629554924786472	2.94902288476481	5.94611467074434	2.12334079916002	1.29659136013535
9930111J21Rik2	2.00940381040281	1.3076062307922	0.362450296845071	1.93069138692291	1.35399780567809	0.484984368658968	2.16326548578239	0.400255480144192	0.17815617903733	2.13969148755737	4.03890503570507	0.122816327031793	1.70730551710229
A130010J15Rik	2.43160801053049	2.18915893298629	2.79316700060618	3.50818721130645	2.46001628485829	2.2582104983685	2.2664653315103	2.35890897593158	2.31723216980142	3.08625373920383	4.47685113798695	3.26723041449278	3.13874359937371
A1bg	0.111938430888243	0.098807205279922	0	0	0.220831454388643	4.73905866281766	0	0.786041314594997	0.00894283537948113	0.249266228244207	0	0.999721642682817	0.0661320942153433
A1cf	0.0404085713285952	0.175201452716719	0.254115888316064	4.64813954635838	0.0728602052901509	6.04873683059267	0.353655525464298	0.0496517516081895	0.113715945523873	0.11657601423341	0.243659755527186	1.8470950216816	0.0698553864081509
A230050P20Rik	4.08770031707256	5.57982855017198	6.71195163578161	3.62030761305027	3.33965594828984	5.539917435622	5.12124074300242	2.18496015570395	5.90303696492358	4.0305489422767	5.52199316184252	1.41349864621631	5.51163679494076
A2m	0.00692481787219839	2.864482554992	2.11165724299567	0.0721954679746119	0.18939886553448	0.0273806653305751	0.324688350638537	0	3.42069699341061	0.0157801071698174	0.337359442532155	1.79970987254238	1.27374074435502
A2ml1	0.0437700467048931	0.0356320440473092	2.83052931734962	0.49882765921347	0.0350973491712512	2.18641921676373	2.01180642290742	0.0325297281182592	0.379694205210647	0.0534958109374373	0.0864140669467636	0.401203583400482	0.277481746623855
A330070K13Rik	0	0.212392937165772	2.10678578316488	0	0	0	0	0	0	0	0	2.0341880780613	0
A3galt2	0.26945118385095	0.579472084911177	0.508568899455998	0.217991209952018	0.254166642816127	0.0216173612082342	0.677343720653548	0.141680424613311	0.421717268468206	0.599746812996033	0.567996087239447	0.0701812635963849	0.46828869741169
A430005L14Rik	5.12218042744807	5.54479510192624	5.43636239784676	5.42122827057376	5.12936341368084	5.20669111888776	5.16538656160984	5.21625422796403	5.14126385187618	5.56502562598327	5.60009860986075	6.74066646155153	5.27893146957156
A430033K04Rik	3.10008027260967	3.13682499892027	4.64269233415857	3.3966714173012	2.87868240504467	2.58342431222171	3.77326781414632	1.70898450012303	3.87682565520786	3.99306827868649	4.19785350952997	2.42976518039462	4.07065959044124
A430057M04Rik	0.75110807063158	1.15474088788917	1.15554460778688	0.997676278462944	0.415915100638859	0.245904628498972	0.70284667908978	0.266860348143297	0.970946419432107	0.808939451142245	1.36482406861651	1.23601248331679	0.725567285813945
A430078G23Rik	1.37061239671284	1.5124220452678	2.99178923495891	2.69285259104448	1.0578445839764	2.61072210165166	2.46617554343421	0.640828462147545	2.14919872687782	1.97093576602239	5.29387517802245	2.72397258082012	1.67142779062632
A430089I19Rik	0	0	0	0	0	0	0	0	0	0	0.0741680498804728	0.581402342534199	0
A4galt	3.65334486326252	3.82797496785849	1.76830411290305	4.21692655669381	2.70430985986123	0.446843036295685	4.59502791242511	1.67831614551574	2.63181798316703	3.78499829996703	3.82355381533049	1.35319550257718	4.3736445475581
A4gnt	0.00877368132144634	0	0.199883864248276	5.80933024137142	0	0	0	0	0	3.07930930349872	0	0	0.0118423631331434
A530016L24Rik	7.4763793425105	1.97435426500488	0.323261101013982	0.542445753098868	3.79850600733299	0.0489515059070822	0.259997670949227	0.813732050133927	0.0217451962068822	2.82075875819201	0.0465938424221261	0.0395222651649625	2.748084673553
A530021J07Rik	0	0	0.387100873860873	0	0	0	0.300566938197811	0	0	0	1.89717720279373	0.912502023585529	0
A530032D15Rik	0.56375611849111	0.215713255737897	0	0.210395235839254	0.11639857758881	0.0547631483532197	0.54810590978447	0.0320582910097844	0.0502695905420132	0.434288573704623	4.19421789487325	0.390787261166543	0.0508975593383094
A530064D06Rik	1.5852052248273	0.94953309503301	0.9721071392427	0.535342958790493	0.58906308274845	0.713803535492797	1.27141068974955	0.362975470782841	0.612350964058943	1.8929690366612	2.50358949746686	1.67345773243524	0.713179095165883
A630001G21Rik	3.22583778091525	2.38279341977716	1.4067292694985	2.24575791757041	2.46356842200445	1.12481784480815	3.52719021239351	0.531820270748895	1.09275392395805	2.84280466005867	7.44455324143234	0.662673565555376	1.94752612220708
A630023A22Rik	0.132048704194912	0	0	3.78650190177886	0	0	0.0824100080909176	0	0	1.59360935013639	0	4.07468374514767	0
A630073D07Rik	0	0	0	0	0	0	0	0	0	0	0	0	0
A630076J17Rik	0	0	0	0	0.402051195339886	0	0	0	0	0.609918506418736	0	0	0
A630095E13Rik	0	0	0	0	0	0	0	0	1.64828797080281	0	0	3.02368659654431	0
A630095N17Rik	0	0.0637848832295515	1.09678690276431	1.18673396412601	0.233643643147396	0.506958485725587	0.526756676982938	0	1.5602518908391	1.77989797856633	0.415409834602062	5.03068383004464	1.99029463540252
A730008H23Rik	2.18397114716183	2.45769300431249	2.83445984418006	3.30865883034293	1.79135297852909	3.8203216437547	2.47330988305281	1.34639253754098	2.85838781169915	3.24876813601217	3.30690605998397	2.15735531721521	2.43618531144174
A730017C20Rik	0.520560788832826	2.58338388846139	3.52249904908485	0.154892781482832	0	0	0.560720051515554	0	5.98756179032465	1.41782185609188	0	1.79590050659899	0.882039115745414
A730046J19Rik	0.474675130025151	3.06144529570868	0.186203281415419	0.236386441566047	0.61240934162157	0.0693824617276148	0.421764251985223	0.0508219403298712	0.693363999079369	0.0247643928010085	0.219657776290118	0.1991543939419	0.0701964225168762
A830010M20Rik	2.46080061344963	2.3743091748183	6.48271094432926	2.27983052957851	1.44475404795079	0.923868620365467	1.96218247576824	2.17651922665654	4.63944652650692	2.11653438129208	2.20842829096231	3.54302862770967	2.23834470580215
A830018L16Rik	1.71630666575573	0.939985556814487	5.91106400108713	0.881019079399362	0.419909159197781	0.423977188134344	1.70035181664146	0.199606144844188	2.77704169025857	0.902053094914624	0.975803444545341	1.34529410652579	1.34562571691624
A930007A09Rik	1.7587561662349	1.27058659806589	1.30311810126557	0.846664276577344	0.413810627308304	0.123113218994461	2.03457016431426	0.203050622751391	2.2118483694198	1.23902614245773	1.10032916330329	3.84244070008679	2.02551118180754
A930009A15Rik	0	0.0618197219550383	1.86740079498459	0.103141065462887	0	0.0468927560605415	0	0	0.460883517504038	0.166889592025944	0.479130151577219	0	0.124207084707968
A930017K11Rik	0	0	0.759453808119741	0	0.359356240199417	0	0.0121017673091304	0	0.00763741217350373	0.101692849602049	0.017422526487892	0.180479835945022	0.526303459922514
A930018P22Rik	1.08738734236672	0.833171260694829	0	0	0.221149400199459	0.326699255102542	0	0.104666397356017	0.205914868760975	0.28760462286985	0.155635376555875	6.10046256907209	0.204317561976966
A930033H14Rik	2.69318068229448	2.02615386297222	2.05949209913796	1.24535949175225	1.31550128275055	1.21995950440464	1.35489653772947	1.59046802329029	1.30473976410956	1.69727541072048	1.87898401650283	1.92632046961778	1.797406733519
AA414768	1.77821773385897	2.42242600731885	3.89483596092694	2.0351329819012	1.52920536782497	0.348337425122988	2.34792670253207	0.789388995068549	3.89927703500825	1.81659131911728	2.08906858111754	2.83493060192446	2.09155656709528
AA467197	2.87095488113812	2.24404825186414	1.14260216254335	9.83551183229723	1.50220502452596	0.184047191951285	2.98053053951464	0.245385098903732	0.540983995103086	2.81385808246518	1.55897568770936	9.54429865278699	1.29159293783666
AA792892	0.362884491430398	0.794261669782754	0.505525305244353	0.834108000281063	0.434016095095876	0.113458843132968	0.716803375319225	0.263984153731554	0.589847275966206	0.75536865780313	0.580772171410462	0.610615571440835	1.78355626805549
AA986860	1.37251438219859	3.38921743946941	1.74278109970371	4.34007705157227	1.02060565206301	0.67336934714855	5.7537320463556	0.28983796813802	1.31014119405339	5.25627802952642	1.26031373028144	2.33372751552203	4.16405570980773
AB124611	3.68443288993141	2.74496427047376	0.804118855202099	1.32042813131364	2.19120664750362	2.44071076925286	3.76326090497636	0.715268525683574	0.987395881231522	3.51871128894382	7.45351461972923	3.03196474228856	1.84165710112827
AF067061	0	0	0	0	0	0	0.269222787716392	0	0	0	3.56246885298549	0	0
AF067063	0	0	0	0	0	0	0	0	0	0	0.20769209735236	0.28806413100544	0
AF366264	0.16964928070691	0.0408282971599089	0.0210646496556587	0.356449180934746	0.16533401632672	0.0800603273322644	0.255352273054401	0.0283142562153423	0	0.100575402568783	0.380481817181343	5.85182206986841	0.030340992007608
AF529169	0	0.0320111085549111	1.68748024263538	0.0250648347314	0	0	0.00899543500353995	0	1.40169257027271	0.0530728089818886	0.0412081413457143	0	0.0136611986560333
AI182371	1.5490808959892	1.66549954909821	1.80814452187619	2.02601759432556	1.58689072910247	8.90575325269905	2.89529199193608	0.705225238681205	1.75138232516683	1.89961244923936	2.24165100094647	2.4872672171307	2.26779989063092
AI413582	5.44009032460248	5.8819846914903	7.28357023448445	5.3791581570712	4.38656782412033	2.63091453255633	5.50287547760857	2.71948140002265	4.95362120443567	6.18923158293502	6.38618749718899	4.63742430748083	5.62706576873349
AI429214	3.12630936479306	2.82641528297231	2.93569541612547	1.65661832450825	1.62829882497858	0.841784620594281	2.66990760682708	0.537570034393875	3.08996958260274	3.17175805336808	1.81510218760878	6.13004718128782	3.42720614484334
AI464131	5.14839247863147	2.3815858508242	4.56809546933714	3.2702861826157	2.65866595475505	3.69121612466054	3.1297349235828	5.79982934200713	1.75330242777019	3.82784326148003	1.26054154985915	3.0616998453169	4.30071354107808
AI467606	3.85918665654897	1.85951573726473	1.59381570797181	2.47089188033318	2.05516154586576	0.420161940291378	4.64106562685116	0.969106746604147	3.26123835356174	3.64322130160277	6.7272657936696	2.30866071759559	2.51326761446834
AI593442	0.105757062722477	0.510831313408264	6.56336666575785	0.1426709259863	0.424584087094858	0.0374491142078897	0.230312651015568	0.0722604212738544	4.72934947798798	0.220274308611967	0.145916897930036	0.871608108443162	0.114320200015842
AI597479	4.42613643423669	4.63818137781633	5.19400299113172	4.31503617573677	4.37403311005495	2.91144489253946	4.6342558000254	4.25551270868743	4.34423650609422	4.53284171507758	4.0037319085639	4.40928931944021	4.56431581643001
AI661453	1.36928230433458	0.481078006763322	0.194128184549035	3.99962913214745	0.413266525228021	2.40018347619388	3.50941781368228	0.130708378190773	0.57822740359758	4.69177748971096	0.20613316265595	0.4722309191981	3.74672265011307
AI837181	5.43505277534639	5.53987243266602	5.90580635924452	5.15371097561727	4.71329351738915	3.60608753151058	4.95318122095285	4.95455643016902	4.55981225756832	5.15224644129678	5.55017606735844	5.49314947019365	5.65749243082099
AI987944	3.98796364079494	4.38794060218314	3.65796578306748	3.95875485740148	3.75531370773411	3.714390780474	4.04568078680023	3.61923428944711	3.95273998428636	3.86189232344079	4.71703675173042	5.84728930271306	4.08087561189252
AU015228	0	0	0	0	0	0	0	0	0	0	0	0.0352270177337651	0
AU018091	0.201636605453899	0.712453661982567	0.290695903526807	0.0925256440618791	0.0705563410350291	0.0242953511701038	0.592772244388395	0.0413781361077807	0.096727148042795	0.395141194241507	0.123291281088855	2.1356000797223	0.190692121171933
AU021092	2.51201638713525	5.92167488011872	2.27256702367349	1.90944239446029	3.81250498398342	1.32079368719416	7.35198082536954	1.08718485996412	1.70185853338983	2.3323799826582	5.83870143482962	4.17141547405805	8.86701485902216
AU022252	3.15371717305428	3.28980369941282	4.17923530914452	3.22292894376167	2.61780626116521	4.19816577816861	3.02432863179904	3.45591139161274	2.75821170536098	3.23562426928426	3.04404190736726	3.85467624239038	3.15189833811155
AU022751	0	0.0306005626252103	0.12503243815279	0	0	0	0	0	0.144614660644366	0	0	1.22895486716199	0.098598287895252
AU040320	4.31520889229417	4.79304419187631	5.16961984173876	5.62327912300471	3.86688547007733	3.32800863980583	4.49994380199723	4.36776522106664	4.93664583287465	4.34271915539453	4.43206059578762	5.29034990428745	4.55259484273412
AU041133	2.67210032601204	2.74091070788671	3.12559606775812	2.62795041828072	2.10020290362505	1.7556275990097	2.37168687994912	0.557620911038916	3.0152963935297	2.27555735710261	2.86163877260543	1.21404389480114	3.32354049222344
AV320801	0	0	0	0	0	0	0.192066852776613	0	0.0132450429254081	0	0	4.19191828920269	0.816270465630001
AW146154	2.91875217116994	3.36631503984088	2.89109039055605	3.4179175078339	2.51206678942503	2.1476392495956	3.14440553786071	2.16268403103409	3.36443789714323	3.27801537519023	3.43746493302865	1.87725787434168	3.54543212822219
AW209491	3.93131531989884	4.75642446929728	5.00284985763416	4.27309362868135	4.4049473369862	3.87670044213315	4.08603593683732	4.14839740998931	4.68975302666672	3.86747483783604	3.43855633615091	3.70750430604087	4.90055937584504
AW549877	5.99516236568086	6.36274412408834	6.14057455001759	5.67581077113975	5.03662716605082	3.93064132821449	5.95660642354814	3.8787603048457	5.77980293567426	5.99912647100733	6.09803386961492	3.91142512348813	5.91143138177513
AW551984	1.54764458865257	4.03412132534715	2.82516284974401	2.50340562517847	0.208496196567615	0.0596542109132371	0.526520636205121	1.08532263313088	5.92726653061142	2.60686613040836	0.0839790068788094	0	0.326356534045723
AW554918	2.55229563794935	2.55266609809336	3.27614122867985	2.3914588289103	1.99023614780942	0.961914462654554	2.8725270500847	1.65619098649647	3.22787895755863	2.89084198975227	3.12716575336856	5.4961291526454	3.10052502519924
AY074887	1.8880062290803	2.25971680105211	3.26422610937089	1.95474493050491	1.87457826218194	2.00677239955869	2.00543627926754	1.56584404054527	2.25727535351143	2.02930163663836	2.42133807489968	2.99355813424331	2.25600159080545
AY358078	0	0	0.132763881756546	0.479133822098509	0	0	0.208991757451511	0	0.969995010173348	0	0	3.43246002185888	0.766288877521421
AY761184	0	0	0	0	0	0	0	0	0	0	0	0	0
AY761185	0	0	0	0	0	0	0	0	0	0	0	0	0
Aaas	4.07767671812623	4.46631593780297	4.37884872736971	4.30596717301362	3.58911567828546	2.97950629097373	4.10000805656696	3.12145699922528	3.84744985721172	4.55419669271229	5.6334498796878	4.80931236210395	4.30044714026826
Aacs	7.60746513101822	4.9854189386909	5.27040085657503	5.48912682577272	1.97790648076498	4.73752206140299	4.14008631721101	1.93557840805967	3.67803927995551	5.96104301760937	4.2040506807216	3.30453459513431	5.08748266962843
Aadac	0.291422104691467	0.522540079540172	0	7.00463525063932	0	9.80031279957605	0.413092308874465	0.0344220687005652	0	6.48697704617558	0	0.0365349443337492	0.0375119764619729
Aadacl2	0	0	0	0	0	0	0	0	0	4.78441059162609	0	0.0247123947007643	0
Aadacl3	0	0	0	0	0	0	0	0	0	3.07176961494662	0	0.572962776166776	0
Aadacl4	0	0	0	0	0	0	0	0	0	7.25963916176187	0	0	0
Aadat	0	0.270207108518951	0.329015306374639	0.088251855291216	0	6.68399346127062	0	0.0873244596755567	0.232552314363926	0.274260206586801	0.0255469173972688	0.15758554866284	0.421189402719553
Aaed1	5.91293751611252	6.04485553709075	4.5057390507731	6.14614613495516	6.19542520660112	6.24955685099825	6.86735880513583	5.98741449383148	5.52757176365685	6.1142905153881	5.66849668374182	5.08875621323151	6.48252207191577
Aagab	4.06290615219167	4.74606017709631	5.1317816409816	4.51753157325879	3.02528261319556	3.45683988856308	3.63007580752078	3.04479412823925	3.94898396566785	4.64113344468181	4.4414352917816	3.55674203584611	4.6880067002911
Aak1	2.69499656765743	3.55264796217421	6.43645722318101	3.17414120152194	2.95190320346797	1.42439387483574	3.11737705413729	2.13807655050213	4.29912533897404	3.20628772283914	3.53564370458984	3.20264013920767	3.5720759038946
Aamdc	6.92884652295615	5.81925364616363	5.98848056039699	6.32952092474826	6.87791654568957	4.75355992643321	5.58196678178855	8.01909782090722	4.39537555947773	6.00220620107528	4.28034573459153	5.60136642210725	6.66189120359376
Aamp	7.40553785720781	7.65355392857501	7.42659980466305	6.97105534610584	6.45946363006005	6.32352766454649	6.80197425431488	6.35357671163911	6.83406749967379	7.09245987460649	6.81337828640605	8.74658056386795	7.33918599099064
Aanat	0.0480258929821956	0	0.510192866113482	0	0	0	0.0734061638901833	0	0	0.227502770615248	0	0.193812714391116	0.13459405090751
Aar2	4.10789389554939	4.8114653886205	4.88548425420841	3.95309782756909	3.75368720948082	2.99896149145172	3.90414784231232	3.93840762554998	3.56861474298916	4.10102775140073	3.80519268950275	3.69575905635001	4.21861529436919
Aard	1.36966717823654	0.450029595847033	2.68812475777899	1.60581179854865	0.337311611314485	1.35326359306635	4.36809458604095	0.136402332239566	1.10110637278559	0.194187808983925	0.0997687232674644	7.24918795387637	0.488772789756358
Aars	5.79773529608599	6.77833828731372	6.79997887441611	5.67784801622076	4.91594079373873	6.28508361027994	5.15137770386961	5.66962697459631	5.22323497230927	5.28200899490873	5.44095656520069	6.16103825489675	5.85395048455136
Aars2	3.22510948363972	3.67130018399729	4.51198444578794	3.5636044193787	3.74542499600399	3.13786082508911	2.93161866044438	3.51047794833238	2.37949240571946	3.38799389443402	3.41635504731861	4.41057558758947	3.57685222710837
Aarsd1	5.58838641242383	5.87368779221862	6.52425547018463	4.90272356971328	5.78518927470867	4.39027988364156	5.05380706673457	5.57604636083862	5.14804330433087	5.25992601206612	5.34835343415165	4.68987964300709	5.87550914523765
Aasdh	2.95740628928501	3.42333438073514	3.91457636927812	2.8435465935649	3.53603126507329	2.55910639171998	3.24116430365189	2.65476396361123	3.58592073021159	3.47941243895483	3.92171156280618	2.69648167312228	3.51433034332997
Aasdhppt	4.91689527212965	5.55509984663718	5.38376663357916	4.44556263581905	5.25515336650371	4.56078661004714	4.48613990811875	4.43980752223431	3.69848770306576	4.55130258368446	4.45540408413084	5.21925983789331	4.81759029872977
Aass	0.449091985031634	1.43660765883822	2.53008835608152	0.289994745980217	0.735398017167552	7.12859460664918	2.72905115529175	0.242732185013909	1.08125348020465	0.842239904804242	0.455094641811092	1.59898555597796	1.96871968186824
Aatf	4.44901721991222	4.74272763317205	4.50061617749671	4.34974333990266	4.05058972265319	3.49901433151465	4.18799012583959	3.68487119090438	3.90667111254091	4.76361442666867	5.11993303996841	6.10317626193133	4.73733384861537
Aatk	3.59671688211259	3.52814798910326	6.75455372935164	2.17016764515684	1.2215631605238	0.925854288955838	2.8913228859647	1.6330014598081	3.82848713135664	3.11895836428547	1.85977110367407	0.413658385566375	2.76117708998815
Abat	3.98174393140515	6.49076357589564	7.47536912263245	6.36846644675639	2.25201547570699	6.91564743525628	2.02952478897241	1.1104480285797	5.00977566192969	2.46115666031471	2.80699902228086	4.26238710204142	3.00699700208753
Abca1	5.83916025607294	5.90212942195784	3.75083078372321	2.50747775350372	2.83754109576263	4.44300124257102	4.1632262658061	2.30947775958379	3.94985871351517	5.16787198051878	4.41638544051525	3.3573769699334	4.39312526468562
Abca12	0	0	0.231948671342613	2.52015847272359	1.04377982446466	0	0.0167745598236231	0	0.0119968387806901	5.2647414038662	0	0.841752591291783	0
Abca13	0.0171946547641289	0.0115419296458555	0.0492713163704029	0.00627608031414924	0.00182352062549499	0	0.0551457275450718	0	0.0560645487343012	0.00817736776831572	0.169388910909252	0.172214485220748	0.00749537857273853
Abca14	0.0201975682799781	0.0208805073131625	0.0440441087025114	0.20773498026175	0.0392206213286418	0.143558719246087	0.367546030366246	0.0146778651222173	0.0402637314686895	0.00801114751289922	0.0157021954903406	5.59467343910242	0.0470112224375183
Abca15	0	0	0.0107133377254988	0.0128825409759803	0	0	0	0	0	0	0	4.52880743306383	0
Abca16	0.01426991160633	0	0	0	0	0	0	0	0	0	0	5.69069415522417	0
Abca17	0.0618192375825034	0.0548765749253734	1.04145525005935	0.037485478224864	0	0.0127795965348668	1.59292433637538	0	0.036445278362147	0.145242004776272	0.339412573126481	5.0291870354898	0.466901090606633
Abca2	4.37089714497494	4.3376286475461	6.28281722974666	2.65433654490473	3.14063645285413	3.64323256848322	3.9694501997089	2.88025739306547	5.03303186429629	4.18116925048472	4.23882057257556	2.43504962711183	5.54411370563699
Abca3	4.89791231912812	4.19999199689565	5.20835204265859	4.63637176457089	2.70000917870607	5.05392708731788	7.09978459148171	2.46354977606696	4.01071479433594	4.70471924502658	4.8627420842965	2.07694605175684	6.39222422524076
Abca4	1.0974286962778	0.418088818676345	1.49748085043731	0.0832797035161028	1.00604554690649	0.0674399492043708	1.53379261333513	0.756148603360888	3.09809648809383	0.770910766965369	0.178738011307251	0.414660815346415	0.316847440498013
Abca5	2.165088944028	2.85234950060135	5.05369646024074	1.60919115349125	1.85199833562719	1.32059167566479	4.42476193083221	2.38384495651932	3.16184664599849	4.92720663710027	1.20961740570248	3.73606589549951	2.92291001282582
Abca6	2.97267922736759	2.00752344673959	1.94552531397765	0.911718822844014	2.67279612301075	5.7267502668087	1.88474545602495	1.64786640399187	0.429231596129039	3.18697215251266	1.11098301654027	1.6672870230587	1.77171455551139
Abca7	3.24647410885676	4.19700438095598	3.60174276580812	4.3587809280441	2.3645961335414	1.41335074444817	4.02599624321417	2.37414647012956	3.60680221866859	3.96261290601593	5.24195327678418	1.32131832875346	4.15680142556039
Abca8a	5.4428034474058	4.74610661489326	2.77659889383179	3.77005352201577	5.72369695603913	5.15929505550875	5.69510162166083	4.65803787756282	3.18394358110508	4.78195544974722	2.5938607201349	1.1909709892531	5.34233578813483
Abca8b	3.28540806388805	3.45760332073152	4.40537404589516	2.41156446891143	3.75669327219709	4.51094206511295	3.9024660862255	3.83022230997939	3.97499908971273	3.33158884375887	1.4458107112376	1.49336874997375	4.26049953921689
Abca9	4.38065904641064	3.37790336738885	2.85820125107754	2.14817686757042	3.5977405961017	1.37850279289323	3.0021188395224	2.85614436806871	1.63989349521019	4.73932348156186	3.16759278293005	3.1832527096585	3.28110437372743
Abcb10	3.83799665139354	3.8822615730065	4.15666640368298	4.07598982675331	4.47771627976568	3.70144845827363	3.74973280530694	3.6118575691562	3.17648771206106	4.0869184217352	5.32092805811009	2.18904565303636	4.37449510146097
Abcb11	0	0.104367161576136	0.0168842110086282	0.0421360022472857	0.0258648568917123	8.27264228737607	0.0189255094916078	0.103543739728237	0	0.0872623593633565	0.0503972652502981	1.41149248322878	0.012096431014227
Abcb1a	3.70281130299594	4.18309621658821	4.21942795382838	8.15638869470618	3.38521452916078	1.79560612207723	4.62644904896506	2.53311655701528	1.26962269784938	2.61756223647581	3.12943683490619	1.69578933684421	1.96054385374092
Abcb1b	3.55018114868706	10.0454241555302	2.14863518413937	1.19927627717491	2.65161923333081	0.395964403355326	1.68493126337532	2.41492347803867	2.05194101497113	3.56363440825546	2.86862836428921	0.283776811709849	1.42871925055302
Abcb4	0.782890306177666	1.02181958561212	2.53161383471365	0.521886789173738	3.87694652132437	6.85331697773643	0.269139515842357	6.49063722637044	1.0823503942821	3.4165077963402	4.46694222024009	1.34233902333079	2.92868626393868
Abcb5	0	0.0384322824920138	0	0	0	0	0	0	0	0	0	0.0864835675477293	0
Abcb6	4.23949653620616	3.99113034547976	4.09181583294296	5.29092645432621	3.73553808253208	5.01107638862585	3.09606247149272	4.02078381008229	3.43485509741456	3.34232774964651	3.7041239332459	4.66080583198965	3.81120169883831
Abcb7	3.3691043696752	4.60628714325772	5.09669685184931	4.74083478455328	4.54053564031696	4.14000548022786	3.79455088558778	5.09167956303083	4.44466584470873	4.32883199508028	4.68784014523671	2.19131944579691	4.250953505225
Abcb8	5.14051282597687	5.38078253338935	5.06804876252204	4.87577792791377	5.36955334824027	3.69466628219084	3.48735216297531	4.54261914037305	4.5378887081011	4.22463332965306	3.77355591486617	3.93768356808125	4.97618776232151
Abcb9	3.78524014513897	2.7307017594974	4.73994065107714	3.1007037731239	2.52568202710885	0.757587070182225	2.21337276999221	2.18035083402076	2.65348110222568	2.20745376290797	2.49239143749815	4.43176900893977	2.20156180777056
Abcc1	4.72286758394559	4.01217534424398	3.68955247369989	4.35595526842939	3.56957982496609	0.687818155654039	3.84413031027636	3.82952872579553	3.14754354489295	5.69662579071802	4.21425929189715	3.85923168495502	3.89500746403163
Abcc10	2.69713934102617	3.16662857275007	2.80255469431024	4.01148454666365	1.48274936788894	2.19688098683584	2.38436515191142	1.36822326612422	3.52547688381846	2.78627897441043	2.82999160615739	2.15369942268642	3.36168632448578
Abcc12	0.145456149914026	0.1241073422922	0.332828357569724	0.0314657340494009	0.0197726414918305	0.0936223803612385	0.193388418913433	0.0423149243174538	0.133114104435884	0	0.032733957528772	6.13866106350928	0.899164432097945
Abcc2	0.172628021722146	0.120508283209659	0.298037418932069	1.28001925853351	0	6.85311874877277	0.0390786759211154	0.0738726168181872	0.0283167011967087	0.15987845150221	0.144180533469221	0.43174008029673	0.0576383668136939
Abcc3	3.6538714829937	2.2303750525026	1.31523725257859	6.56528958841628	0.915466209871779	6.37118774241068	4.58399546990148	0.316755474142155	0.678778851341385	2.2208088355799	4.40003551820793	4.82798943696079	2.03580603507671
Abcc4	2.50087496763182	4.04608939650627	2.70029016724973	3.09367687416857	2.90491955840174	0.978850833886848	2.62092051958576	3.18922624959526	3.30346478296059	4.43452628047777	3.45294547883883	1.40786880365658	3.1083167945107
Abcc5	5.26579351593292	5.70788363807315	7.48248311824693	4.03239800585218	4.89370248009093	1.73568050803986	6.06701280100608	4.93098031551815	5.40400315379377	5.89083144347391	4.97898234601308	2.6501790065717	4.59925619418382
Abcc6	0.144826993228243	0.138379047875236	0.711032818749673	1.93443435267025	0.0114995454269153	5.61307756330446	0.295218288133158	0.0707070495309066	0.0920982547371678	0.491291071815301	0.00498472165050467	0.254308571123371	0.0452151841864439
Abcc8	0.126188319480767	0.835227781150587	4.29446720482448	1.29382280510168	3.52052630388366	0	0.234087125356807	1.42251699602613	2.72136094975461	0.128118290452808	0.0316780425378214	0.537906072155456	2.49968708531706
Abcc9	4.30757224409261	3.61610173283458	2.19096381778629	4.02678565622927	6.200740709947	2.58862241339992	2.63157521753056	6.44563738644033	1.86865957885116	4.48304369261728	3.28613274768107	1.24045908610318	5.04401510185604
Abcd1	4.54066196684985	4.26595023759663	3.66257090222574	4.17690942987336	3.71345104821056	3.28549030742282	4.59112611688573	4.116154277665	3.76317445149392	4.02286072133264	5.28122516042803	3.93826227697044	4.20538264053087
Abcd2	8.2923272301021	2.82679380941952	4.77268706307299	1.6060581053499	2.01854009151083	4.52139515405064	3.82049032671643	4.96388255401057	2.49471846281416	4.36268870471289	2.49295241684638	1.70186796706602	3.75077847551372
Abcd3	6.52547836869915	6.39637030493856	6.23458715819747	7.48352592984543	6.45631628185594	8.36518944373232	6.69633821603163	5.6656537754986	5.35469120065208	6.94944893515038	4.41724594533713	4.21055251057546	7.01758315312401
Abcd4	4.26928582249729	4.20266101170773	4.24782110639959	3.9756525462232	3.07924510584012	3.13233127691652	3.90629423430395	3.04627248923825	3.8582720497482	5.05564916535165	3.91094452962146	1.54775552170372	4.22379884246131
Abce1	5.76998269194138	6.55372167569241	6.65149751017094	6.00251955919702	5.79232580043714	5.59306900691815	5.86532079612883	5.76761463972465	5.35825123291821	5.93222203223494	6.44920493474242	6.20962783375475	5.91080371215621
Abcf1	5.80502057031099	6.13691268619716	5.87566133055873	5.9709623911342	5.26973943805096	4.65225851093641	5.28434926042597	5.76353189401445	5.16589838854197	5.96214173410592	6.16636952182679	6.71339578069061	5.94276388449885
Abcf2	5.36767779447348	6.20261520936767	6.66699180649758	5.13920740481754	5.54207321764026	4.56040572675655	5.45808739521582	6.8119658090613	4.80985897529871	5.86105252801482	5.68019814350448	7.53776270343327	5.7974198663684
Abcf3	5.00403490093735	5.56271065365611	5.74619308478849	4.78686788566779	4.8838844775809	4.45665571758659	4.87310303909597	5.01531768115174	5.12816506354666	5.02353193741578	5.10221884026632	5.91069309596323	5.31016900669299
Abcg1	3.30461990995915	2.91668519425473	4.78754112928285	1.7579182654501	1.54711629926793	1.36362864160384	5.00316816282557	0.676720082943967	4.53379268244105	3.49374315333904	4.76740468061463	0.661417491640135	2.42426736879582
Abcg2	4.98387651823019	5.54067810187471	5.04592448399868	7.2098784677964	5.3184922506514	5.51392756759172	5.07916169061143	4.81249751504184	4.35416042376465	4.99576783487494	5.37400790290622	5.82592193372013	4.95776449667708
Abcg3	2.80933107945921	1.99354777717329	0.423353459739993	1.7739756462799	0.717580610853849	1.85027198934738	2.9026480599273	0.35425131247729	0.499134010945249	2.53664476711116	6.70538178119455	0.824428254555998	0.912503002941631
Abcg4	2.06585806361211	4.28297420448243	5.52072475397459	1.46698060032159	0.253601016578271	0.0172509456315479	0.384551409636726	0.495638248435231	2.46211179839112	2.53018114645681	3.0824472182054	0.298700471482236	0.782364431792896
Abcg5	0.294976223016929	0.274314141392978	0.111959043556082	1.30267342094364	0	6.68830894074054	0.273240215408553	0.0144291137905549	0.111391813294321	0.124371119469756	0.0764130209122668	0.432763114287401	0.0395284407596164
Abcg8	0.0321768904684237	0	0	0.79768577999127	0	5.78693819534303	0.038972703313415	0.0106315608422401	0.119885301201624	0	0	1.02783633114895	0
Abhd1	0	0	0	0	0	0	0	0	0	0	0	0	0
Abhd10	3.92983940496812	4.59519240293066	4.31287669062392	3.54186790481221	3.8768013439365	2.24311692287374	3.36489378949713	2.93010860578355	3.98356711993035	3.37534175142352	3.46407297799423	4.22328551205153	3.59403630954221
Abhd11	5.95428029372226	6.03023358495706	5.35399393202246	6.4378802961498	6.05533192161321	5.14383915782475	5.14760138404645	5.71970718717538	4.41225211445476	5.75764064730188	4.91257050848362	5.87641940555225	6.51290176571848
Abhd12	7.06222622113377	6.66310657651908	8.54503081572703	5.6709215057474	5.69897163606886	4.70930838526726	6.23157115919688	4.68453638431607	5.77319447144045	6.74905071613837	6.36607952208517	5.84443125965004	6.45415146100581
Abhd12b	0.0512759829245164	0	2.48212469710695	0	0	0	1.47242527997735	0	0.105492352066144	5.28440945458013	0.146535374883386	0.340778043654581	0
Abhd13	4.19347609474846	4.43802028654109	4.90876539146943	5.24164489334452	3.6400562704185	3.01516870617563	4.41461467259609	2.97257396461159	4.19878763244772	4.5051602737342	4.33883332473575	2.44117740529993	4.87104195311839
Abhd14a	5.01374902979412	5.25689616062218	5.79679652881429	4.44001980582626	4.41894627426811	3.43622169600758	4.17511621340885	4.02781842664148	4.73343945082893	4.81638024780022	3.4676828589702	6.8372375048362	4.579487583498
Abhd14b	6.26195294166775	6.5638080741055	5.13153066493408	6.34749873407634	4.6399737600849	7.49087268386647	6.12007905537063	3.77943961753777	5.62783997100688	5.91767297141489	4.35816471682801	4.27708297154624	7.61605202007783
Abhd15	5.32671779662074	2.76702906812318	1.22135447860824	1.04539191272122	1.05527920208982	3.864183452172	1.59704195824157	0.49868835924672	1.97285980235485	2.37106638277754	2.1192787840205	0.690338421921424	1.62850413315615
Abhd16a	6.63034316574157	6.17576683526677	6.51293383333947	6.13414360147653	5.57251334496911	4.67492587044605	6.20019654764031	6.12411092013093	6.05555098730427	6.22829366106976	5.92514786022397	6.02620371622013	6.79135418188085
Abhd16b	0.218779000021411	0.32723517232663	0.0863861499585611	0.115257483464073	0.079146113757995	0	0.185072822738282	0.0381964539053944	0.344407824862338	0.387343141895594	0.397067803249888	5.6798479159221	0.890127857177448
Abhd17a	6.18662709279673	6.19167187552259	7.29774870886846	5.77346219110797	5.1224409739732	5.07697253012259	5.46305300036446	5.85058152356688	5.03237309933543	5.85058301965512	6.43617429568127	6.7999464477752	5.86990015084432
Abhd17b	5.31556324711686	5.84367978431058	5.91284795533563	6.7338368103462	3.96666901387719	3.85894115753412	5.40809710454152	4.63762830031197	4.58748049759826	4.82952053243408	6.32985491783527	7.14408370077858	4.77577739967542
Abhd17c	4.68509963334291	4.96799037679359	5.38448815623941	6.54019581681564	4.54426194235955	5.57765299880888	5.81276269979119	2.93682267312908	3.44095611314277	5.48295477839186	4.79044746553938	3.95185116866652	4.96789516041676
Abhd18	3.13797404708962	3.13486375992068	4.56226920909691	3.36145560666854	5.65789923118696	4.13878579067522	2.89857636375281	2.92002093970977	3.96942988515361	3.20721061806151	3.24050932560382	4.6340757932849	3.37768637585156
Abhd2	2.96754178388739	7.24554775838374	5.20089175140417	6.25727081657944	2.53820815920905	4.15911145107354	5.49944496744023	0.956666616880783	3.31450825324178	4.07815093952347	4.22681430384685	6.56792325145107	3.4851594090724
Abhd3	4.17059584618578	7.42287308801577	6.67004171001525	2.44398276877468	2.78486196001355	6.07236201953812	3.34361454863365	0.886815576556942	3.8908036985307	4.65567226343983	0.777451124113206	3.83165466714412	3.67407321982265
Abhd4	6.0218863018135	9.61589126957951	6.20089715348629	6.10908155224206	5.20173031635246	4.55620822768946	5.91820225142386	4.43697299292255	4.97444083398535	6.1330242807697	4.87155163111716	7.64401188620772	6.36484675407985
Abhd5	7.1711658906326	5.33192316837039	4.49936477087543	4.72932898355784	5.51852266246361	4.04908919109466	5.54913729776669	4.78606502019325	3.8662015482519	6.08904991091116	3.744459725326	7.157890213522	5.05138460467317
Abhd6	4.46818176527665	6.70370283479226	6.4653703764555	5.72457884299197	3.2241513275811	4.80799757604135	3.24355428717845	2.37027511302958	4.86629041811453	4.18639871761534	3.77413003196018	4.14070896762059	3.81796272928551
Abhd8	2.87091568631076	6.06510909592717	7.95281441480206	4.01317303079333	3.95696721751291	1.6224286272227	3.74501051423763	4.05459504186513	5.94594360665016	4.08569682765941	4.70281328553739	7.07884367155705	5.04589405481363
Abi1	6.07014907604458	6.11944683351674	7.01427526171549	6.89903733235605	4.64390992179609	4.51788366321324	6.40397158326586	4.01691057061382	5.08797993996561	6.76419398000721	6.77794393909735	4.27328984098778	6.05554418775052
Abi2	3.44577290295493	4.05065949766121	6.82650086247117	2.72508796838273	2.94205138537271	1.25441179483567	3.32115711719776	1.83164462183174	3.75489370071013	3.19959429165568	2.71778075708683	4.16278519707698	3.54255668931617
Abi3	2.93188992282547	3.55666134316045	2.73390534893756	2.29843106324161	3.44874369854666	1.62852621416447	4.19131838544906	4.11371785384067	1.2495056878374	3.4746176910799	5.07158482493007	4.30122698202488	3.29789251397757
Abi3bp	5.12003827729342	3.03777016600092	2.76698312885956	4.42549506605246	3.06742548634347	1.84322735659824	5.71225200428163	4.46538492648265	1.4222309905385	6.48318571205112	3.99614147178399	1.3791092390358	3.40223606275741
Abl1	4.79872309174291	5.11571651255939	4.46839095485529	5.29018343138303	3.79251759833561	2.54205094703329	4.78107551251834	3.99038942681345	3.95073693001194	4.81267480053096	5.08117478003069	5.25451764463442	5.00794136484877
Abl2	2.40248598030549	2.70957582835946	4.47547919356736	2.46945696475313	2.19816710761914	1.16104885730465	2.94412458953571	2.37728571971951	2.3878056781232	3.27065034596182	3.5932108343204	2.71172949588085	2.78987777952392
Ablim1	6.01654092575966	3.36506160345865	5.92614339266729	5.91001587984805	6.92529218943942	3.19115547662301	5.92478065604797	3.63219428648041	2.63875896002647	6.8028801511986	7.22342291354721	1.95118755865528	4.40442884236733
Ablim2	3.62479556250092	3.32161118035382	6.50822001275718	2.86214193926961	3.19435178890303	0.867990883808438	1.95838320312156	4.58904421131595	2.69537245534979	3.30922784933778	1.45657929018274	0.45714215748287	2.97550536951102
Ablim3	5.38217093834207	0.669415149546222	4.20344202858308	1.69224900981945	4.83508795746517	3.77370428692273	5.36765603297252	3.35078898645023	2.39693947069053	4.46683606255743	1.12302153152753	2.19112344542451	1.95266879745942
Abo	0	0	0	3.94112827716595	0	0	0	0	0.0099422684928085	0.0238647097110498	0	1.66941689557811	0
Abr	3.69115781292164	5.83230477972202	7.99748401394643	6.46731182085832	4.06964549686265	1.55205759775412	5.18957890506647	2.7267500974262	5.62013331478444	5.81349595408256	5.27407404852606	2.80396980280472	4.60939104582031
Abra	0.240745936778668	0.245441462807733	0.338114555487079	0.702797138531217	6.12840948834193	0	1.92213594113642	7.25814550179266	0.0201189458502123	4.54173939136522	0.0651713326580242	0.209779245991711	3.85869273727159
Abracl	6.29843008061884	5.79441245514849	5.54881361997871	7.51748787818362	6.15986658732601	4.60354270303233	6.88884118155039	2.84348748001012	5.39243055494674	6.86163814342125	7.60838376828226	3.93418714871598	7.38426469275748
Abraxas1	4.00785361701294	4.33469783117136	3.27696246257218	3.92183449774241	3.9828391965147	2.78477528941959	3.23762342742846	2.63799624413477	3.4852881378185	3.72608825688786	4.44743418791849	3.84768741118507	3.48161441234145
Abraxas2	4.8706427601922	5.41157809732734	5.21544109023688	4.97766064767932	4.66375859028252	4.36610468185438	4.91166264758399	4.65361283915389	4.37662807617837	5.06035528082797	5.24813444171816	5.12047720873844	5.23341957183916
Abt1	2.98516021585136	3.53973833168346	4.31781562979263	3.12717687239295	3.41126169827642	2.50406258271032	3.33281392161672	2.82921305445224	3.17091839843321	3.59546399822388	3.71737707483771	3.8979985500384	3.33824462132701
Abtb1	4.26971636826895	5.05882731068522	5.09773808708026	4.75785659670036	4.24546785128048	3.97370169234783	4.75049708830045	4.53754580514154	4.13761708496707	4.87665006415737	5.17500720721967	4.17710301872484	4.98488283882715
Abtb2	0.788790458871263	3.81350767850147	2.76427509235947	1.96183486577885	3.19837237399361	2.77909671640601	1.80321109056183	1.94547330540625	1.30357079502982	4.53137893978283	2.70481988475343	2.52012468150768	2.43677265202367
Acaa1a	7.08630496029604	6.99743541062503	6.13019295782761	6.70904177097711	5.90304204016391	6.758690223051	6.61481438431115	5.40520001424541	5.60946123480878	6.59493097713935	6.06452725080756	3.17629984560569	7.02697251780142
Acaa1b	6.00687477664928	1.8338612275603	0.97907438511623	1.6566918731434	0.266733021395103	9.79707405542572	3.81898214962273	1.00212305959647	1.31638475453598	4.21729751147909	0.618793593077657	2.76707081387621	2.05853254556308
Acaa2	7.38262392303553	8.44448185261501	5.18026333265584	7.35096904949938	10.0097866532469	9.51837415851618	6.9791140500826	6.69458808623538	4.6353771243275	7.5245933442405	5.78561065063727	4.79621963101119	8.65080996875491
Acaca	7.21170506085749	5.1318128817053	4.84697937033227	3.96191859287502	1.74243922309098	4.47547411971296	4.08075819973731	2.2976660468404	2.44404075791831	4.45015886295022	3.20973774862479	4.22917908658947	5.27036508912492
Acacb	4.61167874994846	4.09500459866944	1.14015648419568	3.02905448772314	5.22000980260146	3.97238433266433	2.18122848535898	5.70041980167844	3.02415483921772	5.06186244995431	1.98689777501724	1.39714574420689	3.67725700779556
Acad10	3.46789630526014	3.42962689689855	2.04629044931924	3.1026953625446	2.01143538615514	3.72116646692637	2.78795474517513	1.89257233565629	2.66557554943942	3.0175231045876	2.68227274290621	2.79270618725198	3.34766701786317
Acad11	6.72749999001946	4.90728172410059	4.74914775761147	6.35087451726194	6.79067596865792	7.65932653730423	4.3290288142528	5.61653741920619	4.69737686162968	5.50763710702661	3.45516833001011	4.15276326221441	5.89423306098368
Acad12	4.25064802004715	3.83324661041897	1.76435356956567	2.98778223642227	5.02132303419854	2.34468650582451	2.96210383365193	4.18664672751089	3.20526217914189	3.09292540842239	2.21193763636631	1.39601707450761	3.61831980421181
Acad8	5.31890198708322	6.23433244356013	4.75519700594769	4.94795402326196	5.16087140021427	5.27709031141484	4.64745514209216	4.66596155658243	4.62369551956318	4.80982483010037	3.53655875889857	3.33480089665784	5.0302082424598
Acad9	5.35555464945515	5.23025123495805	5.54148155960274	4.9197850382606	4.93819801317867	4.39522163582471	4.60593090706476	4.46096869775763	4.45163487048265	6.46296211090702	4.96272329119684	4.44779193924124	4.80101830013245
Acadl	8.36293670761182	8.23276521348445	5.84075128669489	7.3744603226649	10.2226285019206	7.52158578245367	6.88421049061288	7.35518804310249	5.27749740103993	7.03019034925593	6.32937307318412	4.65944628976644	8.14365462281182
Acadm	8.68921278388148	9.10396518509474	5.79614143507285	7.50920148520369	10.4042995848107	7.97646693165623	6.40385474848129	7.73280434520402	4.99028793809104	7.16700388287406	5.98980931746386	4.29230862558011	8.15841118250882
Acads	7.07166139435008	6.73873881758871	3.16001259614478	7.48628380365029	7.20930913107916	6.5878468626379	4.16844898280701	5.64345108163706	3.59540165054943	4.9683972295156	4.555943216392	2.96148893807902	5.66562882924864
Acadsb	7.79165376348707	7.71355121876958	6.2355638756076	5.01345019282843	6.79486091266943	6.37709368622671	6.33834019434319	6.65988278139186	5.9653072153698	6.0265254669177	4.42689741976818	4.37246344141654	6.53491110089551
Acadvl	7.44851272002183	7.69209502383418	5.82467875520094	7.24396316869061	9.72045486034311	7.97795037681264	6.17317967708043	7.55940467262585	5.86820178864452	6.91994598954926	5.63579903715238	4.40194910015911	7.63238173438762
Acan	0.00366707288390438	2.19490772018397	1.03498056380192	0.00752033053288261	0.013007815751565	0	0.00611764735297788	0.0161257018808034	0.0320581203270851	0.0576968317491128	0.00667992801855265	0.325046841014807	0.157970076377603
Acap1	2.23000726917411	1.40409065958264	0.389459094233077	1.85971430577131	1.15278099357176	1.53648285691271	3.75873882158473	0.393218379385988	0.497386083795808	3.0633549929063	7.95819328782411	3.10233233708403	1.18741511828109
Acap2	4.8706145453829	4.69857075963795	6.30351512414383	5.34781791931618	3.67719554610803	2.73610417627571	5.33127480793156	2.92260350316767	3.88073371966974	5.83451708633546	5.3771227635748	2.94968035628869	4.21471729563416
Acap3	4.08501298483698	3.46594440627445	6.1804957970631	3.04575681611277	2.77766835939201	1.16489372900392	3.81244901761397	2.61800242727316	3.89003550207499	4.54527832459373	3.67860525044604	2.4037710430843	3.78700918828513
Acat1	7.63036374215578	6.99441277839314	6.45283664558317	6.81176276757928	8.57970278110224	7.6190776856437	5.6880011741554	6.51573035016013	5.72311121170512	6.38307809731247	5.39403701795728	4.34618009911574	6.90633373474767
Acat2	6.49232540126988	5.85091221481342	5.79670522378116	5.09990038370142	2.66425151434776	6.04077624278115	4.9660813570135	2.53615843550868	3.52829667163774	5.74746982039261	4.33475546368697	3.56411331376332	5.11905811552842
Acat3	1.67616919065821	1.74057086257276	3.65537422800652	0.755779970156009	0.275670088950705	8.03954040777503	0.922135377957007	0.386359438381973	1.07510782616966	1.04930940756988	1.24473247602587	2.19427105543906	1.3670944347643
Acbd3	5.09636769025936	5.52454134485737	5.14356576016368	6.11147894785457	4.26724675077232	3.58888695253381	5.19628278661217	3.59051579023193	5.80841564328421	5.53245531795166	5.23006606236644	5.38464717709	5.73573658800703
Acbd4	6.98120902224704	5.64027830933735	5.13314554298941	4.37215127754421	3.89830652894484	4.82791725231498	4.75507029353029	3.96923469464185	4.17478146707079	5.62208393726669	4.17997804774355	1.88352168641193	5.34860228848146
Acbd5	6.14089618675796	6.22415536088885	6.51062987372799	5.89971425198471	4.71607009888852	7.08946773173045	5.91521519416563	4.74163168889688	5.57174041886767	5.52602662252851	5.0867932495493	4.99987917564371	6.03271363032808
Acbd6	5.264074796904	5.47842375393623	5.9685761020854	4.71926022040018	5.29778783573214	4.51974211577615	4.67115501553826	5.54652765843864	4.60838889454396	6.17778124266498	5.30305561324448	7.9473255684684	5.58587813031014
Acbd7	0.12023559465631	0.83288139615993	1.57514549872492	0.138550166291419	1.61523403886782	0	1.14493323444062	1.33490492810141	2.19512117138067	0.546354661748547	0.232416641607022	1.78453249658882	1.24267905423668
Accs	3.28642120557706	2.95660678168598	2.09983129455039	2.18818792240676	1.98696779782778	1.30843534944379	2.74165063624396	1.46996795457453	2.99657841811622	2.56084078503476	3.22713411433809	1.20747318518067	3.01701869730084
Accsl	0.753323427291157	0.104227625135344	0.734456530355281	0.0774570695521996	0.0344840535720392	0	0.0634210966469387	0.0538960477595889	0.421024711835988	0.129239650180434	0.0391134883252774	0.0872532396164947	0.122039412921947
Acd	4.16901351781033	4.18934510039708	5.01379309952985	3.70847462638679	2.92414063416032	2.8613545811622	3.99528791137959	2.57833136406782	4.34113832103624	4.30845499864919	4.94001188739934	4.80943677832983	4.93547566264386
Ace	5.36273448721115	3.30292686759329	3.25977110944949	3.88792398975799	4.60601232354559	0.315470279768765	8.35438186456874	4.3218968334318	2.65007203925332	6.23304734672535	3.73720603408018	8.38250065902509	4.26863090455221
Ace2	0.410849732301197	4.03112155160051	1.53577822041204	2.02860389441737	1.63523559260371	0.412625250025422	3.84724332738409	0.483930172890614	0.767996834140802	4.69341177740959	0.170774284399618	0.46466932425643	0.392484322733494
Ace3	0.0104406351744951	0.0579505799587304	0.143245633238914	0.436799519200427	0	0	2.97179838978036	0	0.0720176575191502	0.0624276216759866	0	6.61743263040765	0
Acer1	0.405445154881261	0.54656649600173	0.869995476760514	5.77388580513089	0.366663659409916	0.25280535782273	0.726973631288376	0.150122015407686	0.551402099778156	6.52290938401153	1.11618949347036	1.50270401491903	0.742427222786236
Acer2	4.21491388305819	4.46860257389476	3.71880282254621	4.57129550891868	4.21757941496781	2.88094109823001	7.5651840865082	1.58120810964169	4.27853291768652	4.80985335249523	2.97778054393966	4.74345636133359	4.48154940316562
Acer3	3.24690832033104	3.58577029406611	3.6019086564698	4.21623835784321	2.93579331783474	3.34197568070846	4.9795508506928	1.44039935404249	2.72882112247725	5.49568793096475	4.38342879248684	3.224657651058	4.37544566888929
Ache	1.55528174712652	4.29989543462766	5.85195211743255	4.10231700648632	1.34700153531053	0.556528113961425	0.917150068655891	5.19022680654898	4.34907520423113	5.38364069008011	4.17544241760909	0.210928144568272	3.68960337147043
Acin1	6.22808739393225	6.97138849220863	6.90896043270362	6.55900597501448	5.69409519990357	4.61588722582686	6.51132036858706	5.33944651287956	6.60849398446498	6.79718893485809	7.4920174835745	6.82105155408735	6.94775290793776
Ackr1	4.27188044286179	1.29905048359283	6.63591740895648	3.05621379242001	0.633224033787644	1.91221401932547	0.606472768694157	2.4658769843773	0.592891199763799	5.77870303996125	3.37957476035555	0	4.3183207544891
Ackr2	2.54477231729583	0.550330957868268	1.20756800777744	1.21523668485281	1.46809057432832	1.2176720209084	4.78131679565683	0.808803659961025	0.164861594566342	3.06567584895333	3.68842688401463	0.352191545045696	0.709393876949237
Ackr3	6.4536754415462	6.85150194186596	3.90674043634825	4.46450104957294	6.80539810388488	0.746945659139415	5.64501057826677	4.32946872225385	2.37689236768068	5.71663929944931	5.51047216833789	2.31959558542545	5.0398707856045
Ackr4	2.26095633272192	0.649188061494472	0.670865225995271	4.17621583439492	3.11752262569185	1.34763809472457	3.4316383166513	1.03615689522455	1.50938933134284	6.49810672683033	1.92460898377229	1.00366125200942	1.47060534556234
Acly	8.36041893881491	9.58551786460027	6.64648139862479	6.84851932244263	4.14553353222445	6.69483180055317	6.71612935490652	3.45017188234424	5.74860181893947	7.23600646338127	6.44228676041713	4.61237669935893	6.95298421215385
Acmsd	1.08342613671736	1.55298665058168	2.55674515162705	1.49675958065366	0.931999148119702	3.91166880474781	1.45971271668978	0.930285063177866	1.32715326894769	1.57483181776767	2.96867841370615	2.0184079142689	1.39966917628725
Acnat1	1.40420559406639	2.01504551648835	2.55079806171487	5.53173797554244	1.36641222017239	6.45675235505872	1.84367511909305	0.914059432059383	2.00708612239939	1.72555145612238	2.08925247508568	3.58201275067336	2.593918745018
Acnat2	0.0561677742805138	0.0465677983782896	0.113593220678249	0.108543540181167	0	6.8118418245621	0	0	0	0	0	0.533128548258374	0
Aco1	7.34725867415771	6.02352497208623	4.51896271870775	5.62435082066467	4.18989733197529	6.47987589853927	5.0030616778172	3.52303673345006	3.6429446305989	5.33001029677815	4.42852929920216	2.82568333037049	5.26569373585072
Aco2	8.50827571032187	8.15361422310992	8.91336548258638	8.50599742363818	10.3091136423482	6.64975315117701	6.87875760671302	9.85658732835972	6.8955423102495	7.94391864535766	6.71629211235474	6.60091586997862	8.69009908223424
Acod1	0.118368222532528	0.127643322437651	0.0274927959242386	0.048438407466802	0.107106192896537	0.109025136465451	0.16112364431652	0	0.0234133364885192	0.0675157741095134	0.442793622552723	0.0490273826440044	0
Acot1	0.826576852235221	1.82226633750903	4.1713256736213	2.69994226126256	4.12810885485669	4.49086701121534	5.54964741149625	0.381374607927054	2.4602368879886	6.62060560667148	2.73823112457063	0.973827956298315	6.85809743521944
Acot10	0.0790570088701426	0	0.267584742229279	0	0	0.034569271825538	0.0199100520897414	0	0.0421986538834706	0.117054222152933	0.0263945009232112	4.56102897444141	0
Acot11	1.00361643749168	2.49024682091025	4.54485530075745	4.73815205957204	2.84381524508482	1.80894545078936	3.00468663126937	1.5726937236217	4.07999987597159	2.20302711648177	2.75131329371771	0.8590137074513	3.14661076112108
Acot12	0.0199092292624946	1.29780524348388	0.530738586038198	0.122921912059905	0.0708484329547647	6.66536812420709	0.0632987723630192	0.033580206143915	1.62109050678391	0.549534138067236	0.0323849328272056	2.43635933191012	0.470107969913716
Acot13	6.42487945838893	7.00455233157545	7.97124633619635	6.97945649041553	9.89896162900678	6.98740434555356	6.40343203659305	7.95397419397259	5.51290955278753	6.58971067875005	5.98070187590055	3.80885318131614	7.85553612110935
Acot2	4.24737161266371	3.58704175888137	3.60524181179053	2.66875977364558	5.82377390586997	2.13874180244106	3.88115909893524	2.97258621746283	2.34399071800971	3.71412574305177	3.56286663729479	1.72794077099425	5.15460987982626
Acot3	0.0793476837872486	0.320214680915127	2.18841782163126	0.0424200089343868	1.1249991878783	5.43104702648677	0.0081018997771692	0.0795310243722838	0	0.0275456785319998	0.0247345443847478	0.0890362234230268	0.0632421471067923
Acot4	2.41112129579795	0.866819979947715	1.68379020248827	2.73369311653395	0.854159894423324	5.23282945136176	0.345270143387855	0.14628217406314	0.246491780955153	1.04955865302489	0.493459774653737	0.184929716093277	0.402953335949998
Acot5	0.0552182149876582	0	2.51731960588186	0.161198004398513	0	0	0	0	0.0777833630096084	0.937038384717586	0	0.0893617576477058	0.0235667545353331
Acot6	2.24869596096866	2.84463804040473	2.66257660298986	1.63780260364581	1.63221559398985	0.505624854869301	1.45548312797776	1.61159668230037	1.73455061076751	2.62713883261483	1.16387914104352	0.596503649371716	1.93633615630655
Acot7	5.26355048988646	5.57599475395197	8.59840899576245	6.7983453777634	6.19068099324062	4.47701676575916	6.91708119812184	4.42242771744808	6.31423878987395	4.41052679892356	4.83397718211094	9.38368038951026	5.35266866582566
Acot8	4.50187957388686	5.23067613964165	4.86458806789416	5.78038212521589	3.8295237089332	4.20410852953596	4.59230394415295	3.31326721678421	4.23738078807687	4.82804086221988	4.88817772611975	5.03381624177254	5.27113766723005
Acot9	6.7035787263058	6.14054393052936	5.16755663754257	5.19882447341566	5.46692441261204	2.53170285860796	6.13378977718317	4.89918972980251	4.09151291462689	6.47176240108422	5.65102090334136	5.94340086039644	5.7468060683906
Acox1	8.64949239351367	6.95339795005054	7.18714437352845	7.62566173277968	7.00610354900323	9.56769459242641	6.18819366126438	6.28375117116657	5.80346107766491	6.54828473561015	4.79778852552136	4.29840888193871	6.75447244291958
Acox2	0.297864839166313	0.236670188365945	0.186344986609213	1.49759021099265	0.29407665584319	6.75275719901671	3.31328487133262	0.314627572181353	0.51919022242771	3.73247853455485	0	0.17046947157212	1.72672690770828
Acox3	5.13144540718354	5.63912160429044	4.55568939793283	4.92216751535285	3.74103952867678	3.77914033905986	4.82452042633547	3.84153424995857	3.66875354795826	6.63612920338696	5.96357468104718	4.94076483331512	5.06212895874661
Acoxl	0.478626123559319	0.623746866247801	0.255437757014297	0.167837566185923	0.0415266723315131	0.0371965476419184	5.45410371543658	0.087899432579958	0.352152446058685	3.55857372999469	0.589518482862562	1.85165649583242	0.553142407262353
Acp1	5.76290967022618	6.09368020672041	6.12368157826388	5.71080838131761	4.96528943155627	5.5281088067954	5.18386330020747	4.84061686217238	5.05946362801118	5.54234511144114	5.53944860118543	5.78389814472548	5.58812284887315
Acp2	5.2833292316921	5.69463085293089	6.00283179681446	4.58144753044564	4.1065511954865	4.63166573298819	4.86121556076794	3.95985928597576	4.84215792431977	4.65399994994164	5.46328094014611	3.58761822307626	5.14962219193803
Acp4	0	0.170192372190863	0.103216164673732	0.0561305504520348	0	0	0.0165760993696773	0	0.18194374608927	0.210284554123931	0.0233225141398678	4.9112101911666	0.10658035990885
Acp5	9.33941829472302	5.18007445886416	0.981937035134915	8.01292230591942	1.23309575642298	6.87936800891036	4.73158927590568	2.30220916933673	0.909941708379357	5.9896566921676	8.21638632769363	2.4034645911581	4.81494609386777
Acp6	5.35123684803525	5.55169284146123	4.52191128839801	5.65650312665159	4.82595303259705	4.89234581780191	4.60417928303918	4.74424290178567	4.75577886132757	5.36525528420063	4.92963902570286	3.07216172638382	5.26602875165339
Acp7	0	0	1.40538372407124	0.0279200631454514	0	0	0.136700018644816	0	0.0278112921519462	4.0976692556629	0	2.02848718321099	0
Acpp	1.00829413449432	2.07953178940792	0.399019791758821	3.37860959529199	0.109394907796825	1.7939652597525	2.14816611936177	0.178356741219674	0.232156329797575	7.03103250602366	1.78754708776828	1.12400238805086	3.78794055895007
Acr	1.76652442235696	1.16060030782089	1.89461200806814	0.43117554216817	1.12763275962587	0.0805195188656611	1.96054216140583	0.551018638835019	2.39427503218761	0.53667573976832	0.535991598688528	7.99333881155784	1.00157553587252
Acrbp	3.22872404807451	4.0909244646305	4.00658997505215	4.06009697787015	3.29464545134329	2.44176769433439	4.08459054463569	2.57214083808058	3.84494709801741	4.21236123909567	4.68380022726871	9.13418234546045	4.2416448249975
Acrv1	0	0	0	0	0	0	0	0	0	0	0	8.79837013100135	0
Acsbg1	0.54102853517478	8.13384520961836	6.98607755888978	0.595423045547046	0.380667783260506	0.119953130627963	0.66590642482945	0.268978576222398	0.465197824164813	7.97140665594607	1.98494855217271	6.35844310255886	2.93752918094174
Acsbg2	0.26520180188523	0.636150342559168	1.21958397337706	0.325586554112022	0.221155167442522	0.0917443196198898	0.297737080781325	0.320459422702439	0.483699598908467	0.623868927049929	0.715426548137764	7.5872740772437	0.260717093224969
Acsf2	5.14307797912276	7.19230515943878	3.61883854310007	6.6872848119055	3.59111522041261	6.32980236470631	4.36759056552645	1.55568432961497	3.41462664068113	4.3241294655799	5.65999718554274	3.25840094669548	5.49636247947906
Acsf3	4.88864179680886	4.72994631508452	4.03487169078014	4.35278473098765	3.74871865581975	3.97946604107524	3.25572304349574	3.18351676762786	3.629899426484	3.6478353333526	3.53751725686908	4.03688566669409	4.7442577734223
Acsl1	9.53153972341391	5.77583178819023	5.20448470254852	4.372084861477	8.63626086616975	8.50077859298194	5.10600171895783	6.80801130366494	4.09547065584487	7.07284841343696	4.69952510362795	8.83956080162358	7.04213018781114
Acsl3	3.79570429804324	4.77173737786402	7.53214498771138	7.25639657037696	2.81826037876163	4.72077826809076	4.28016878669203	5.03070033017339	5.55203022840644	4.53416950612214	3.65711485493758	4.84411997438655	6.48794735368671
Acsl4	4.18910653098005	8.01046006601742	6.13221224176331	3.86689805190306	3.2128215193308	4.52487133481193	6.18655745111423	4.14837576078672	3.35388075320672	5.25682013040835	4.73777439194382	3.51991088602478	5.0730586936451
Acsl5	5.66230414351134	6.13953814850661	5.98372845996839	6.31570125164158	4.35994216308171	7.97093446723765	7.31121147059884	2.48275881645369	4.57470724627061	7.95098669837869	6.56180195903389	4.79110579184375	7.19036004299951
Acsl6	0.139208335176351	2.89151374181746	7.42062201883454	1.58347619105388	2.62154980232309	0.283559058532816	0.160440743868038	5.88576812077391	4.40913399010251	3.22405218845251	1.9529396580277	6.43613142384319	2.05851730672406
Acsm1	0	0.0533350628870888	0	0	0	8.04669160389831	3.09990223940078	0.212618326976805	0	1.24216440194116	0	0	0.104726317831265
Acsm2	0.602663038283046	0.587656091195628	1.07932623278738	0.468089381809552	0.332454785349213	1.32575954120058	0.505117415487427	0.236874042899342	0.616642536094181	0.76979110776709	0.821612523142453	1.2580613994699	0.538273481437257
Acsm3	3.78002071125863	3.12576382911358	0.444528183375172	7.02178114500155	0.226717068333486	6.40875228439663	0.71193144580332	0.606794420253133	0.278464320162862	2.95360541756155	0.440408983526103	1.5503796987876	2.6604587043532
Acsm4	0	0.0160321157640472	0.264307032916114	0	0	0	0.0208304576306572	0	0.0417706506563232	0.021849382049913	0	0.0800131989458732	0
Acsm5	3.70691723996581	1.5636847808425	0.132638648210217	0.118840792729744	1.70282863429669	6.30789381452565	0.26363103519286	0.269506382804499	0.0603506114445415	0.708573342324731	0	0.501996926312774	1.14018793995014
Acss1	3.23641062672314	2.93565595403064	4.65838610740145	6.11082678259774	7.10730458831476	0.261032002258517	5.23500987070696	3.47080895774169	0.707209473921023	3.84474773833222	5.78645194833448	3.02210185395412	6.13990622191743
Acss2	7.14847755458776	6.02253871956263	5.8337303426936	6.16909061256758	4.59733331414835	7.23968585870675	4.55427125075981	3.90579103224799	4.06025692649857	5.5072803141688	4.23973193783404	5.60670697290361	5.07962674890755
Acss3	5.62994873496806	1.76499697817885	1.21616401228892	1.13815601451027	0.789055789275846	4.4307665520177	2.80199145630282	1.88753784866786	2.21986255093171	2.99314041520183	0.148056431273841	1.03433048437603	2.47849306531117
Acta1	5.0548426214559	1.46877902701442	3.54358383698765	2.39482234998931	8.94503379300919	0.349982014863385	1.07335627674804	15.2566531440874	1.68337017120026	12.6456715484996	2.29848607387361	0.353986543981892	11.5933628749769
Acta2	7.1457494021899	5.06564852914618	3.48803907532076	10.5830487518268	6.90242207622207	1.19471853604966	7.22943207957815	4.81274230101569	1.90187307399537	7.44175120482559	6.53837936368315	5.25735183938046	5.9075905330967
Actb	10.4346162158731	10.025987814364	9.9633662092373	10.880021841821	8.87629696389146	7.90196836803752	10.6189865221473	7.7782147932463	8.17243782670613	10.2486992565802	11.7913419787274	8.97458410507975	10.031571819978
Actbl2	0.0292056527266801	0.059368812204289	0.0916532151234336	0	0	0	0	0	0	0	0	0	0.0627707499247953
Actc1	0.580163222723075	0.403201845178832	0.380246124767022	1.76355813102773	13.7237821644143	0.713626980766371	6.55949680289649	10.9405645746783	0.222798148209589	4.01546131102603	0.499465446320791	0.207743670227176	4.09352599342502
Actg1	10.1722465343297	10.1133322734427	10.2465370280031	10.9220262214051	8.75670005267825	6.19762910696135	10.2589118801012	8.00182271704793	9.05683580431176	10.5747005355292	10.6009720663385	9.44638219680079	10.8548739844926
Actg2	4.01740920745637	0.82756350414961	0.382338158756151	11.2108172368534	1.08887759179277	0.321573950213633	4.83929646000261	1.2540456462551	0.315411229264984	5.15557365744184	3.31460899559692	8.43470629450352	1.35025087669606
Actl10	0.35578679772365	0.177683318204409	2.54199327764314	0.0881381989491544	0	0	0.145037805751022	0.0410012140258766	0.194105953511969	0.335303690599221	0.240878730498063	4.55787298690952	0.0786918774872981
Actl11	0	0	0	0	0	0	0	0	0	0	0	7.89035233990797	0
Actl6a	5.24905082088499	6.19839218347161	4.57149452336742	5.63185398284704	5.18823006534726	4.30643636895893	5.59589291501094	4.52018611597849	4.91671629868407	5.44794314809116	6.09808637996989	6.75895530179505	5.63915193626338
Actl6b	0.303941171491749	3.21690874755828	6.97592817598863	1.01610987354408	0	0.0835152627534712	0.0624056779739226	0	5.46376690644738	0.257032901773006	0.124630467191787	0.436059083667871	1.24301879308947
Actl7a	0	0	0.0568778558547354	0.0186408181033323	0	0	0.0275152818547508	0	0.0199140022559545	0	0.0379327170773599	8.65892540893368	0.0199349282960434
Actl7b	0	0.051292704592368	0	0	0.0734014056911219	0	0.0455670789246067	0	0.0269536870247871	0	0.0430033744671607	9.30125956571238	0.0522508956794711
Actl9	0.359441529179277	0.361202496955538	0.368896295271309	0.22183197812207	0.122231048191901	0.223670120701721	0.378666417578122	0.033300460997978	0.159384293920343	0.443746665786706	0.129617998988873	9.06255841488463	0.240341195374149
Actn1	5.16383662362917	4.88098965834014	5.92500756711094	7.33402325003412	3.70286925571432	3.66367577937375	6.40821752619657	2.7087045586587	4.44639796499198	6.62345825149806	6.60584018997242	2.8138173215888	6.76167906687875
Actn2	0.687773069402407	0.835477522837915	3.73617334326211	2.06051865816694	9.43065326602565	0.377224379447105	2.23833159615145	7.06390938242648	3.5369335050392	6.70813536330375	2.51636267461355	2.4281815337586	5.58951594065797
Actn3	1.13309319139729	0.943044712398451	1.17865626419668	0.383447822587784	0.395119021064449	0.066990948626327	0.351109478961944	12.7473043821787	0.480234092584187	9.14745846270275	0.511611811879978	2.86196562004469	8.10193213734587
Actn4	7.87147955626714	7.4552206907621	6.45679371192657	8.40646520695543	5.76752081781483	5.83228858355255	7.37975637395508	4.62355410053157	5.9516404221521	7.86095478363979	6.92649730055137	4.63955368999107	7.41964223639061
Actr10	5.2864795290178	6.06308566450193	6.76257310508388	5.30592888064414	5.19160906208072	4.28037077085721	5.24060182078354	5.01868873105385	5.4681636107651	5.49818639726932	5.09537715507714	7.65577107711157	5.58866306277125
Actr1a	6.97585476348695	6.70191880821596	7.61223904591171	6.89893183098297	6.24962173854766	4.86189155394375	6.74911494754445	5.92298065635865	5.72999811405641	7.06091117442082	6.46032418366773	7.56204632808585	6.76858913100054
Actr1b	6.09368108560945	6.84855247183481	8.0253494751596	7.08320864099036	5.71302600954141	5.12874836448759	6.03117134281679	6.62579397521586	6.05469525571389	6.18984790173639	5.94499127231783	4.69876216527087	6.52598272269608
Actr2	6.65361344815559	7.02009010509891	8.25800230242016	7.28667239448109	5.99077260513322	5.7310268873626	7.07134576045787	4.8831420467586	5.3861009655133	6.97742086579213	8.02532116331224	4.77592733168874	7.06478143067124
Actr3	7.64640762602646	7.40529533481223	8.02448885292108	8.63645603911223	7.07418166451824	5.9656697970824	7.48328390578701	5.3203465598748	6.50323880284654	8.21753719151569	9.54714247814436	5.20400280392349	7.81703149723614
Actr3b	2.59849547381744	3.41673398399681	7.07729764061989	1.00460723979975	4.98570649970276	0.313973701805131	1.06296390943454	2.47986479959686	4.62542818655565	1.57432957434478	1.3756344104898	1.57492322224754	3.95344408729525
Actr5	2.98755696474729	3.56505033645604	3.03147404352439	3.20412360001265	2.20307943255294	2.22677731810678	3.48335746714526	1.5573980641027	3.21929702064576	3.51063498256417	4.15716511829908	3.64797722387307	3.37633526871555
Actr6	4.43359346858832	5.46352657988792	5.52456647898181	3.50611560871888	4.69782700989079	3.89550094787614	4.31380469107017	3.64964688747626	4.55966371882691	4.15469066791661	4.52144219430437	5.52696594774599	4.35694071529634
Actr8	5.01775336566171	5.74678123222343	5.97088594222913	4.97462435159767	5.09364010677458	4.33525302768042	5.33598110570461	4.91869821407187	5.13949237331205	4.97445504974391	5.18559504351932	5.52225366179622	5.61554782804165
Actrt1	0	0	0	0	0	0	0	0	0	0	0	5.47678985109206	0
Actrt2	0	0	0	0	0	0	0	0.0509065561940607	0	0.0199782494778271	0	9.0428473889345	0.068392482212953
Actrt3	0	0.0596940154163221	1.18454422103045	0.0201678644627165	0	0	0	0.0846688802361581	1.34286576204117	0	0.0165687085938957	6.11579869384384	0.121650134596502
Acvr1	4.56390084215913	5.41073197991331	4.76598106347258	4.26155014287337	3.47842469323746	3.04537405455502	4.20203712281424	3.78619523667387	4.38124332137381	4.64330288028351	2.3529799746627	2.42025801863629	4.07812845105785
Acvr1b	4.38185199809307	3.15308894663842	6.13164552184627	5.89266439383905	2.86261775342029	2.23518378118679	4.9379984675931	5.16971297362347	3.81687535379147	5.5455687716257	4.11343020030021	3.42781365628842	4.84640003569705
Acvr1c	5.77397690993015	2.3177242843021	3.31085742970581	2.43161263953054	0.0407995418470541	0.0354056165308926	0.111437541296974	0.419453899905915	2.22970408051181	1.85493078107806	0.194122052987226	0.401475788142729	1.4885256989945
Acvr2a	3.93288629305724	4.05545554215537	5.69617142796312	4.44509907701858	3.7462160622841	3.32269197273611	4.43021105531769	4.40505952256872	3.6608241828638	4.81163148447562	2.62224426066948	3.95176335800659	3.98822307623712
Acvr2b	1.73592548902341	2.20142296345432	2.93835076530293	2.18631910467798	1.52662274915288	1.01707585903579	2.8335082877861	2.87060388063739	2.51909742842951	2.56538111064343	0.921121784900995	1.47298117827912	3.03707969832191
Acvrl1	5.24375144594901	4.0232528521536	2.66478524684333	4.26516697151589	4.23804738084797	1.37393866910942	8.02931830239464	2.82974391660544	1.78099999178159	4.41183287430141	4.11736946807134	1.24176043458006	5.77893613300078
Acy1	3.98851357916537	4.23381360869829	4.14274524734225	5.3316491238495	4.25844550622148	5.49281612388573	3.42442262304288	3.26763555880098	4.56990561247593	4.02187806829175	3.97457510373793	1.78521075818562	4.13485123740093
Acy3	5.1445386168036	5.18007593521099	1.76598524462249	4.61433905112503	5.06609872715746	6.49066922759885	3.80230338700262	1.96842893772436	2.06319948762506	3.26921588524354	2.65835111471961	3.11675632976308	4.45017955470523
Acyp1	5.73702380099303	6.71338653331595	6.55979257081396	5.23742576309527	5.39135151345446	4.56780808893898	5.79760357091826	6.34096203096579	5.78122706828585	5.8525460263513	6.0485759133789	9.38701252261525	6.88610035877085
Acyp2	6.88991230130581	6.74386233247821	6.65209307831508	4.64636971951053	8.16723082786287	2.57145719677887	5.73167421566705	9.00819776968329	4.65760859805857	6.55017908566361	3.64087856239018	5.33341151725322	6.33112070631892
Ada	1.99196123823413	2.80762324071695	1.07596462774813	3.14486115732922	1.24857211660576	1.46165642651676	2.38482670022483	0.513692318615501	1.19201474779599	2.12465970743276	3.56612972940371	2.23222123464482	1.60896680556605
Adad1	0	0	0	0.0185899495443616	0	0	0	0	0.16774583795009	0.103091593772557	0	8.46327676868869	0.0201332085587742
Adad2	0	0	0.144503201429837	0	0	0	0	0.204739013249246	0	0.997370697366168	0	5.16809178698692	0.598297404559835
Adal	3.66295824795855	4.74695141589211	5.02588044201407	3.46641778111368	3.73389085461754	3.75046883187293	3.68885865869055	4.85163779260422	3.75457252813846	4.19712407741908	4.36154053494607	3.78012437016388	4.63225583909006
Adam10	5.46438895328684	5.4599477082017	5.99705033208488	6.12380864175243	4.9254399964511	3.79895692645297	5.8233687029304	3.70398256999745	4.65175986411339	5.72698864869472	6.26594137653498	3.93051090288493	5.47971454673321
Adam11	1.45746723896014	2.72292400747961	6.80999166394379	3.26351778448495	1.96199212492182	1.88507374465244	0.966994060440007	0.627679007711093	1.30668949489547	2.13898004636029	3.20398861488427	2.89532500233137	2.35529761580004
Adam12	3.80589651555568	1.00047127836582	1.79409409458057	0.584716152123451	0.537900967717032	0.131990726914873	0.869610192327358	0.234915191844943	0.630799780046511	1.44816064467761	0.964441991791276	0.659954458414843	1.38674869921487
Adam15	7.38046004596396	5.9198757170079	6.43765384068999	5.75144843088652	5.44739104502613	1.43816709794467	6.129372458798	3.78118616040795	4.09067387588349	6.29895085818987	4.43747813215067	4.2225023185063	6.19524715913315
Adam17	4.82201268479262	5.08721820212588	3.75196614975483	4.61410693513908	4.65524799124961	3.34574642649238	5.23366441063617	3.51486865674435	3.4617942511073	5.74896354326923	5.57812712914753	3.54614186379102	4.60049053077072
Adam18	0	0	0	0.111376749010609	0	0	0	0	0.0157781515288432	0.101912084388673	0	6.80517049837871	0
Adam19	3.91710370991022	2.14771701111702	3.47108386196881	4.17499645887313	3.87907311929526	0.597232266813524	4.75360767288986	1.96211301569238	0.722666579625507	3.5188808266651	5.2227795001336	1.09081789501868	2.31601725692034
Adam1a	2.21566387246658	2.81679907930281	3.85057354880052	2.25828244281403	2.44797800407304	0.618621180361854	3.12288250178486	1.25557842925833	2.83343680101102	3.29996378445875	2.30219522413969	7.23036516785323	3.22649109997046
Adam1b	0.0397566062022644	0.0747976039316792	0.39842621223223	0.0302863261740036	0.0381153816816635	0	0.701655470480625	0	0.070632606738245	0.184596048990523	0.0133239858670408	6.88460156785085	0.99214691487232
Adam2	0.109307856419746	0	0	0	0.0171144280800024	0.020869957038382	0	0	0	0.0166278522413984	0.0139436247153171	8.4538447391259	0
Adam20	0	0	0	0	0	0	0	0	0	0	0	6.25067155329415	0
Adam21	0.127174847461162	0.356810011472313	1.06740524965805	0.201331373644075	0.113749601803739	0.0698581494438458	0.212188349349378	0.0330824175741489	0.302186557359663	0.154656217924082	0.106256125749943	4.89044089431711	0.303288553989628
Adam22	1.1301000149907	1.96606885472775	6.40033149906689	1.69216874316275	2.10750524381329	0.155955152433817	2.2555178209355	0.737145532742956	3.35821936117281	1.51897885491283	1.87531309118827	2.50103191493668	3.13426447226276
Adam23	3.42009260158837	3.140806470856	5.90467684872453	2.75315958388634	0.967952100602085	2.28322858328402	1.79814760760336	0.939514866567697	3.2960186366749	3.48773552931316	4.02108494112023	1.05612672225876	2.32937322897707
Adam24	0	0	0	0	0	0	0	0	0	0	0	6.90178236670704	0
Adam25	0	0	0	0	0	0	0	0	0	0	0	5.46891125075687	0
Adam26a	0	0	0	0	0	0	0	0	0	0	0	6.12283261782504	0
Adam26b	0	0	0	0	0	0	0	0	0	0	0	4.17875507693004	0
Adam28	0	0	0	0	0	0	3.84638931318232	0	1.61087861638355	0	1.8532704306607	0	0.272218655395124
Adam29	0	0	0	0	0	0	0	0	0	0	0	5.89114011386584	0
Adam3	0.0918112114847476	0.212651167824465	0.197063687159889	0.102503083522153	0.0170921173406427	0	2.09983526392935	0	1.88965143467493	1.18202727813037	0.150089828788808	9.93739042596096	0.0173387330691623
Adam30	0	0	0	0.00905639628824492	0	0	0.0458274009828754	0	0	0	0.0889787234654359	5.83707027221208	0.00966467396611784
Adam32	0.260745199171341	1.01654778817804	0.478384650862343	0.0367061120631443	0.320043766518342	0.078732347668166	0.311824959211064	0.2458213642184	0.151760296674839	0.34952891210294	0.116491470374445	9.33776263233057	0.300179432489874
Adam33	3.83066605213539	2.61161068110389	2.56948267693941	4.57960071707331	1.41316196589822	0.620271845061828	3.20325701210615	1.82937950348551	0.128711925949267	5.0466908402959	3.2217188285665	0.519472483234362	3.08289867033049
Adam34	0	0	0	0	0	0	0	0	0	0	0	4.81414777446043	0
Adam39	0	0	0	0	0	0	0	0	0	0	0	5.71962531948084	0
Adam4	0.769732412502752	0.866138196239977	0.739329182578624	1.11221554036429	0.600027965456038	0.517609476657923	1.17274052023088	0.392047470247338	0.586893125922336	1.07952147350889	1.5822195771049	5.91304978489838	0.670178315751789
Adam5	0.717000104855413	1.22669909666001	0.422343645021096	0.218713016399829	0.366964387902126	0	1.15378392395328	0.112656702261336	1.94844746389099	0.296779160658356	0.528808423676427	9.9543301258849	0.547357665441359
Adam6a	0	0	0	0	0	0	0.010598521195176	0	0	0	0.166847466984469	6.53541215432062	0
Adam6b	0.0314956791931695	0.0443715757905093	0	0.0686845446922513	0.0499762963013809	0	0.221132905527294	0	0	0.0202960351258187	2.31751738140479	6.35739475785343	0
Adam7	0	0.125971720909497	0.0766599549219368	0.598918460735148	0	0.0530634378547729	0.798890711503371	0	0.279016663414143	0	0.0625270748584694	0.0295585235679782	0.0745991878225735
Adam8	3.25374128389639	2.45111317343867	2.77174159636947	2.03779137660728	0.948868870511865	0.248189525177881	3.67256583298895	0.893795596761466	2.56965090574979	4.08405628376783	4.63322083736347	2.24623165516352	1.77042688051916
Adam9	6.54976885686564	6.31045420077384	5.68951143077495	6.24651612554848	5.14331843064939	5.1440051547815	6.64292830282669	5.8729336380005	3.79118192679569	5.63514275124324	4.71056077903001	3.76096520376644	5.56333215074218
Adamdec1	0.0719103528665387	0.873557691476055	0	8.16079164556426	0.0131011359624879	1.37732025055175	2.89974710149007	0	0.507487376045239	0.115480313111431	5.63422683995249	0.0298502506099842	0.125155308660258
Adamts1	5.12628413655943	4.17192458441739	3.05114846764771	2.48498751666088	3.77391043179045	1.9464610938438	5.52437302772972	3.84283044729435	1.81231249110581	4.87083703322157	2.3505108225778	0.766729986500989	3.0649639712862
Adamts10	5.07068092249675	4.53424137783229	4.05054455110879	3.59915551020881	4.31805747751313	1.87463552895529	6.6188280694616	2.53015333072444	3.34390734994291	4.92285889235617	5.36115854757925	1.38715971107138	3.95537950819511
Adamts12	4.43853170126526	1.26784305619618	0.289566869701461	0.922800138680274	1.10001754156997	0.185326014905663	1.11616413259347	1.82981311414649	0.189961891916773	3.21282776432135	0.615136361293896	0.383871273836445	2.05001102796627
Adamts13	0.0976324561003374	0.0559561955006758	0.749261812894252	0.363905428846256	0.0901886690899839	2.00133222545156	0.64376599775548	0.0159662675399942	0.454133536706017	0.240552807520449	1.62496992978071	0.154877662811251	0.37153473821624
Adamts14	2.27860841868054	1.48776088918904	0.318690690305627	0.724090100920186	0.420086229039581	0.378015258037436	1.4769115101526	0.672448284236385	0.00626272713586623	3.85501930534867	2.26198342045823	0.554354557415221	0.558818248077698
Adamts15	3.50022169254782	1.86283578482452	2.37336957478352	1.70999071295838	2.05617518203151	0.421463496919811	4.2841615530496	1.13324731450862	1.01503149750809	2.32037136797357	0.50888978588031	0.52982524163455	2.69777175191409
Adamts16	2.98002324731735	0.116748806882061	1.75405791325924	0.435025960344079	0.00488942113050146	0.0234083795645907	0	0.381673595901389	0.331902623356831	0.03801810825559	0.398940831749714	0.143429040039943	0.97898587050151
Adamts17	0.493337460400742	1.0997121193279	2.22108748205407	1.25013102346026	0.46974092663158	0.0853531750304254	1.90031349283758	0.175556963969817	0.933895880228886	0.885147423393675	0.427065848915412	2.32215088601221	0.63905294832934
Adamts18	0.36191558274287	0.0384284696397109	0.808975358538203	1.12618690325275	0.017599109145739	0	0.102484883322244	0.126903196243648	0.111534059005522	0.238901471525879	0	0.090703294177109	0.096860900134476
Adamts19	0.923687545154742	0.0785196992380432	0.855385188343766	1.37864802353205	0.579452099263216	0	0.163571537682956	0.0292023194375195	0.234301393144517	0.758747412142061	0.00812848136532184	0.648525460348355	0.0216319769000045
Adamts2	5.65106150683025	2.54818744769336	2.21363387888399	2.60264135296197	2.98139757908697	1.17413985102005	3.55853736133523	2.9144645290622	1.95738157758396	6.29914627291487	2.22073087112487	2.11836763408563	2.93688802018554
Adamts20	0.395809955982551	0.465216554543677	3.47662535097989	0.48650406820771	0.285919302061978	0.0179099492025966	0.621129085689624	1.9294053678287	0.150142344848605	1.2967769390642	0.597247208312637	1.66195732699684	1.00533691695459
Adamts3	0.791550540306089	1.36844548513854	3.20736797115578	0.984530732670082	1.35235817546687	0.103533137601037	0.711964377893252	0.993965863046651	0.274332763759436	0.388734591959619	0.80706104367897	0.661547491705739	1.94373532018087
Adamts4	1.81702888351382	1.47306223174368	4.14058108855562	1.61604457534938	0.900984488952687	0.335843164724914	0.828137538328242	0.564267816399004	0.562408270638995	1.58256512388908	0.99411628581993	0.885793409563955	1.28663320710153
Adamts5	6.6847868451491	3.02064846231602	0.946408941195526	1.36433234087515	3.65407268541747	0.620379308112608	2.56883668249156	2.25795964476385	0.48034200422011	4.20878137528358	2.69395405983462	1.4484788148552	2.59741935751226
Adamts6	1.00710644547218	1.61456949528136	1.10402177374387	0.647746695282071	0.979086132149304	0.554640258543848	0.92781590707641	0.191577932314915	2.05972860139639	0.964832291659044	2.4526514457102	0.451972870579306	0.94187875020462
Adamts7	2.12843769884479	1.98955883165162	0.22829882313214	1.36042154003904	3.13235256480327	1.7429097914315	0.927404702544937	0.407665262231918	0.585435465901439	1.97292447083544	1.33445807558782	1.22317717568054	2.1131586239285
Adamts8	0.5796481078882	0.199641599114392	1.73540917736907	2.1379387102743	0.333281886219918	0.0217992236358597	3.20849340839946	0.351176667030132	0.133513549544506	1.01742339939319	0.999809493609097	0.449825091455243	0.444391592207954
Adamts9	4.04517069901433	3.01998919158017	2.0341339282417	1.55676420565634	3.21961262261159	0.70753429507323	3.67764347036464	1.65646104500118	2.17766672112827	2.19433458174049	1.77681095295493	1.64658625089241	2.18276221395917
Adamtsl1	2.28743864797431	2.588216372704	1.67309367023625	1.41405176034493	0.356019758748417	0.270341933672842	2.09332301017705	1.77868891312547	0.453320760729012	2.83268687218902	0.324341053063551	1.23858666630373	1.18652095174991
Adamtsl2	1.98847298125124	4.59243410187329	2.301706133017	1.08777197212006	4.04809925973063	1.69146665039172	4.9727372509454	1.3095898739203	2.86403061118423	1.97181742403273	3.73064354144152	0.546883838919914	2.3500722337977
Adamtsl3	1.58298519638419	0.2006807153585	0.658344643516335	1.67888008175701	1.73926728868167	0.0426484450691747	2.39092038797465	1.14214211094365	0.157009774860674	1.61239437334394	0.233274079681426	0.576517241612044	1.88621139520394
Adamtsl4	4.6114649143039	2.66102166286273	2.4462102137347	3.66817743704501	4.00354533061839	1.12289604644692	5.00638118392023	3.01859144524547	2.30912332531976	5.28179361564043	1.909238426914	0.583822724151967	2.36774359175101
Adamtsl5	1.79252899058578	1.67755927539427	1.04575106745494	0.573792364194382	3.84722329130686	0.00116512739024925	2.3715711715053	2.58482823078673	0.145784028714004	3.26458056566864	0.761536360121467	0	1.59290826406872
Adap1	5.1048962616242	2.11693202533095	7.2988614488003	5.07786196551647	1.22025339850682	0.625357035915829	2.28358689511935	0.652627864656266	1.25140071320541	3.24101067528109	4.41735879145354	2.5593824056873	4.39386315971734
Adap2	4.94767093927769	4.09930657317891	3.37048612243595	3.4103437524508	4.13681416633107	4.80007297492856	4.67973810722169	2.27794971288669	2.56556530574639	3.41842748643079	5.03097353078568	1.2916153945858	3.81492912031805
Adar	3.87800127114324	4.78731111267038	6.47627350339061	4.95160314140903	2.96450723699273	2.83021874210645	4.39098439426702	1.50357188439256	4.59989931611737	4.17404726071027	5.80273350687759	2.16835119703053	4.42802944891701
Adarb1	2.91633001011632	3.33531753417769	5.37266693985483	1.30094846291613	2.38669269950216	1.85574605961547	3.34224794114678	1.51982014484961	2.88825498676363	3.44959124819423	1.232425124854	2.88569572417905	2.39483754071852
Adarb2	0.111071319321838	0.178432564321235	2.79960059656755	0.303841882336687	0.0935409378335864	0.0739326717442044	0.186609968817398	0.0590359647602954	0.686358675171161	0.203074294819476	0.291035039126473	0.220187920554147	0.523196691164238
Adat1	2.59407123924005	3.26047831668526	3.82391012570057	2.72026766430852	2.25234167472609	2.28981515267724	2.88978544975453	2.43742108168459	3.21933422287712	3.1559912242264	3.54085256983533	3.23569181281838	3.37467654550977
Adat2	2.70987350466516	2.57278914579414	3.44047415228819	2.87774413543821	1.78109692527514	1.90537063901074	2.07353274137567	2.39388868903798	2.10741246568546	3.06797549157512	3.05754714258852	4.4298179524711	2.95673801440838
Adat3	2.22641539122999	2.57221147736495	2.50081672109209	2.53151999896369	1.11049651663361	0.847806806061134	2.01856658008639	0.740300191964778	2.42508446561212	2.62796328742412	3.03040672087723	4.22476458977618	2.36971643018001
Adck1	4.13262368090043	4.40048041239138	5.19207907402974	3.4787046139956	4.7253470258326	3.31761942013625	3.61862574335475	4.06236212898087	3.81846784835083	4.07617428350755	3.78649318099618	3.8352790489566	4.27142780129284
Adck2	3.51632444799594	3.70960774112598	3.74745337859874	3.87413321471192	2.5190756271234	2.42891647087377	3.25623196785856	1.90500977188424	3.5831585721716	3.85751491091712	3.79778974422142	2.32445556359887	3.81721839125479
Adck5	2.88919340018791	6.47690533108616	3.54834393626594	5.65404193448315	1.99287470028354	4.14811882448238	3.13362813662296	1.71383551076615	3.75873147951368	3.89472937804175	3.38576053230263	2.83536668557872	4.19907294018741
Adcy1	0.190812040121163	1.77042393295444	7.48759825357229	1.01138088925898	0.224816981260991	0.0657409725774573	0.719998592783615	0.247597599672956	0.610366356125274	3.77690024007403	1.18022796447466	0.836260576182145	0.199694454977892
Adcy10	0.876427196826666	0.0698620203061504	0.733181881699526	0.0250796544617647	0	0.0158583391845685	0.0265815411618736	0.0245547695748296	0.0324686172535754	0.0803777143784928	0.0543304092611614	7.26052954456104	0.158497827307838
Adcy2	0.675984931051229	1.03929019970897	6.47465066464995	1.45645411469308	0.261383564320081	0.0833594233012148	3.52759356305643	4.02587857791343	3.69690995672286	3.22258996726004	0.480143692100174	1.7708383517297	2.77719641826258
Adcy3	3.94941227753061	4.59402889874508	5.11924334369778	2.38664330851793	1.89482475928921	0.567661536505292	3.46737861057145	1.14911025738265	2.7630760706411	3.76571256948064	3.67405664278953	2.54638560757221	3.38916666294924
Adcy4	4.41456941333974	3.02634539403837	1.79406038963665	2.00140326599278	4.19338335651443	1.92417964619653	6.08096214162266	2.66237444691416	1.25438730456476	3.39069499129452	2.86497613752735	0.306716325010445	3.70569384329045
Adcy5	5.82598358094679	2.7770930165195	5.65427877736554	4.00656081978526	3.66054363775646	0.519926682362466	2.78246233623623	0.790721617197294	4.73650565294421	2.50068233050981	2.00801422683535	1.38353676190252	1.54498036526716
Adcy6	6.05799668194042	4.61084110048267	4.86126080611961	6.70479508038164	5.71172359843554	2.70422583558527	4.76170894636731	3.24655895479718	6.42985829799506	5.16492190063817	3.97740042597951	2.22780658376972	6.2110226582058
Adcy7	4.00072236618698	3.91462141725562	2.53541985686406	3.1393182016873	3.42649431977534	1.18989222074896	5.13718035409168	1.83774699159555	2.41634109185136	4.98040040057933	6.69511797517603	2.35746393637425	2.9829022998227
Adcy8	0.0347691625371336	0.170321637899444	4.16000520960072	0.172596522860543	0.238477300795496	0.0125728986547605	3.66636080013709	0.0135406340560652	0.418153397637395	0.0505357617060732	0.0236307852855863	0	0.0855564023013018
Adcy9	2.99586506737653	4.44662274931002	5.14211285586724	3.00511980164767	2.56814293911488	2.7444508381025	3.51936664171584	4.41583643772197	2.2507195321167	3.42646889069627	1.80762913646342	1.85836764865822	4.15532005590181
Adcyap1	0.668762077803069	0.737877722197086	4.22683369054225	0.872234018400688	0.147805563614373	0.313204902852781	0.594797710710172	0.327594668947266	0.218546065688749	0.195930241341018	0.309971514360531	0.152415572990303	0.521146583484704
Adcyap1r1	3.52116879690242	5.14729367354181	6.46553320738201	2.73647437487318	1.90157105122398	0.407352639259075	0.988591498795379	0.955259122810273	2.73582205919517	2.87366033762437	0.13361808076142	0.601500412324785	1.85774780160762
Add1	6.55033524654692	6.41251910838189	7.93051083875899	6.95084149436495	5.65410789668559	3.81326165440713	6.76983383344217	5.02779717692704	6.12402474982481	6.79435658671064	7.00405613795247	4.3781750751809	6.92854886411256
Add2	0.0322048024886117	0.951977100278852	6.7007503900977	0.769017630535843	0.0356290032434578	0.00712929593472999	0.0197321858512907	0.0379655530945634	3.60875723724873	0.826397651676586	4.29417959856095	1.17989591552293	0.0877989784833924
Add3	5.86697753567427	5.11745109425055	6.70281161403911	5.74508530679499	5.31596103598959	2.99210302588228	6.39798214439576	4.31819636529409	4.39280998790507	6.46746104132472	7.30060385190176	5.63557861127228	6.42633197482667
Adgb	1.40685116975031	0.864697956718255	0.82949801188238	0.485188577222856	0.0874344342853993	0.543078460381687	2.77997037725616	0.0352596569164588	2.20410351200438	0.374244955915346	1.36352636204048	5.65747017266607	1.16310868089568
Adgra1	0.0602969476496752	1.90050326476926	5.28692004187827	0.200296047116916	0.0933702387199982	0.0348936093814488	0.112320143939084	0.055119344104129	1.35716504393275	0.294393827870857	0.201514837398192	0.436405800476274	0.134321741615296
Adgra2	3.35988427180749	3.56845503637706	2.9046924328348	3.28324061389772	2.27257659644195	1.21651225035426	3.97916037618757	1.83789109240273	2.15261685600425	3.93724569151645	2.65602855051096	0.617040084081621	2.50923443052303
Adgra3	4.07663860923143	4.97195101618735	3.84464122295936	5.20957732712369	3.59067127330326	3.91360146309177	4.9582861831174	3.32789167317778	3.30359434155616	6.46037539807736	2.05750103410104	3.43435546380327	4.67985808338119
Adgrb1	0.0647662847269457	1.71031716999882	7.30708232938496	0.798482680822916	0.023009365179278	0	0.0760456642798557	0.0275986248076682	2.49144767102105	0.421957680186429	0.421961706040216	1.80787885450964	0.152339299935755
Adgrb2	0.751043837135056	3.51890521675897	7.49266742486938	1.06799634440728	0.52470562845993	0.0116165819379732	0.24214953064402	0.302933929463789	3.7053566249944	1.99497750349591	1.27461189566334	0.621687949118007	0.798099919262316
Adgrb3	0.00699806869082975	0.975592956146784	5.86339365830145	0.835851454441946	0.0191668656737404	0.0253803093014394	0	0.0295364862246808	2.22938794602638	0.103865542339399	0.170205050316937	0.715865476064636	0.437163874454418
Adgrd1	5.56862392242526	1.21694622401021	1.91752949524239	3.06551431454695	2.56736259243086	0.337118766439249	2.40353578231603	2.0836491296604	0.651753472585263	5.56549653468406	1.04253749362994	1.58441480815531	2.14247882711145
Adgre1	5.46584006664057	4.15734237646921	2.57990740229481	3.33998205248203	3.66893008580613	3.57007798817154	4.16258425108605	1.82496025849352	1.95981291480837	5.46441042620715	5.87702268854586	1.76201223232665	3.37441600434739
Adgre4	2.41951475451467	1.5086934330906	0.102822409476053	0.455616055624183	1.0990371534075	2.34513968140594	2.45794818566965	0.202037602248475	0.138829050970655	3.31333867966746	5.8423128809288	0.0618871906425185	0.921994744191414
Adgre5	6.71098066818144	5.45119227109423	3.33129332562361	5.86017921370077	5.58895012521365	3.94904223447563	8.91447535469458	4.23473936756068	2.71481323752055	4.75221395616051	8.20016139269244	2.29702487600933	5.0086409141873
Adgrf1	0.0482305280274584	0.0205226523413933	0.0865467683712954	0.994841565701687	0.0937903043200312	2.39296840632883	0.0171423913157756	0.0223729112711495	1.81335907615573	0.197830623880577	0.0268457519965432	0.156717890798584	0
Adgrf2	0.078705596145517	0.153678173369697	1.27725640648823	0.0569581515191194	0.143159450006805	0.037871485170328	0.266737086659502	0.197169504599543	0.108829711478895	3.2350318263594	0.151131593588605	0.032080641058726	0.0759073686417163
Adgrf3	0	0.0151346669534966	0	0.417673446625863	0.108753465753302	0	0.204957129836144	0	0.0468970189529508	0.0280242815458779	0.169860027748641	3.78636024486938	0.0409105375328114
Adgrf4	0.994099825775347	0.434959404744704	1.9525475688151	0.135489568319942	0.457296480933066	0.0474870598626271	0.296717421014667	0.727949717601484	0.19345044289529	5.84735388534795	0.134535916294414	0.146191902156448	0.40942621059897
Adgrf5	5.68559652384363	4.82914663317298	3.66430276869712	3.11861632454783	5.81538825620798	3.12029305403316	8.40331570979444	4.11589519739614	2.47482249809723	3.8074077785328	3.8239531556018	1.13502305964625	5.86817032819686
Adgrg1	5.1680128030266	4.30184012829571	5.24988348759988	5.42550498360769	4.19981989002049	1.33106928561947	5.5519765545292	3.20716571187821	4.42903400457424	5.22261853660414	3.7127397070029	3.99395933715887	7.7231736382224
Adgrg2	4.1547257751202	2.5020624870946	1.51519074274134	1.35519692552197	1.02803030473285	0.458035225284006	1.8043581784498	0.802776561797765	0.915701473193183	3.42151815456291	2.39247247718933	0.900199778764528	5.78094092678604
Adgrg3	2.44751489795296	2.89334474424372	0.444622038234294	2.45412226057906	1.83981225900224	2.5650370765045	3.35594472770231	0.526005044137379	1.1134964613354	2.49098416751293	2.39751084518264	0.244272167258858	3.15723979766448
Adgrg4	0	0	0	0	0	0	0	0	0.0149553776318647	0	0	0.0394499430964313	0
Adgrg5	0.901573192651692	0.791889248894391	0.245093835904494	1.84445504279915	0.19595253725997	0.203180042394801	1.72054117669975	0.0930122086284962	0.0943295610704284	1.47031307782066	4.52560221992538	0.0935163293374352	0.758198815486231
Adgrg6	1.62867598497754	1.01968295162957	1.46568794232524	1.70211060241018	0.874621078973293	0.559083338355675	5.2755197152118	0.501918649064283	0.217525210670845	4.89309491066444	2.71675805711633	0.0451757241828974	1.28157202155972
Adgrg7	0.127778747141578	0.0689631244024622	0	8.58031402867705	0	0.0173551452738676	0.120720189851974	0.0184304459435781	0.0175990333432828	0.224872994789881	0.68788932458038	1.422406195733	0.257318524233902
Adgrl1	3.29960953742139	5.10522758290004	7.07582184904389	3.72032321006713	2.21341186566036	1.37260996542089	4.50333214573638	3.19646927323922	5.07206660725408	3.45520138778605	3.33922928411009	4.33979209526282	4.62673867480435
Adgrl2	3.904482262432	5.05242891317617	5.35629561939128	4.07495192049966	4.4503186136344	3.74301501331757	5.2155975063622	2.59587938230044	3.53565079481364	5.65569353504726	2.80206476741478	3.51425909188027	5.27167817190657
Adgrl3	0.571400529629478	0.963328336649222	5.23226986101797	1.09198177451679	0.58857510217849	0.120768221952473	3.37717636004784	0.0886160293634359	1.44091773923649	1.73811514028401	1.52946691407851	3.15551892267386	1.99199202191046
Adgrl4	5.5217338828706	5.82575159729225	3.8144656105087	3.15668733730469	5.94862306342314	3.38493468694728	7.14538836911769	3.6432344687046	3.90350628156624	3.55681923044305	2.91562829445108	0.499504955857328	5.48574241225363
Adgrv1	0.0238694110697607	0.548723672677629	0.505204657754553	0.0752210568379318	0.0452874560631165	0.201300178714589	0.273621017922803	0	0.301045879240931	0.356169961998185	0.0705130426230709	1.7387999468748	0.0820630019177536
Adh1	7.67548494657885	11.6505422502207	1.08858762962351	8.50738592851809	4.29481535756989	11.370273735085	7.30110051981426	4.65152258437391	2.88151112418468	6.25088876195082	2.02528522308987	2.17657161171599	5.7424744988335
Adh4	0.455549688835893	0.180964169918319	0	0.0698489687263858	0	7.49343136607058	0.0851960805047908	0.160568677270537	0	0.254012947723714	0.0336758413840107	4.41053555791581	0.071591664727011
Adh5	7.13277504614613	8.11951003679839	6.47573181145892	6.77603852390509	6.86970304539992	8.44733415815156	6.42651500704262	6.2722535444107	5.61595895611641	6.30761138909608	6.47015139257945	4.72673730323068	7.03109763497557
Adh6a	0.201582001176759	0.142860351972675	0	0.272014693061632	0.0792577436739207	0.0380329797611677	0	0	0.013712265668307	4.35600308420842	0	0.0971321762700526	0.121550570621091
Adh7	0.231712739009355	5.52051969613955	0.19947921331714	0.435585651136491	0.127144009731627	4.1653353783607	3.56614230969921	0.571779922786337	0.215714782601602	6.78563677388575	0.0811948969529406	3.63650674913935	1.33273503141849
Adhfe1	7.61648900291281	5.35942875454201	4.47932594353211	1.84218166381714	5.91984352537099	5.72107288524891	3.12051183708679	5.41715462330342	1.28787891516796	3.74048319491696	1.41773357466341	1.8141509800182	4.17164883429489
Adi1	6.13866948159174	6.78816195471936	6.03013505872499	5.71232762877916	5.66070714852139	7.04351564451753	5.87219165996795	6.70795792335427	6.24274782454676	6.10756099532603	5.89067528448919	4.78925734233553	7.20366509934629
Adig	9.62013226100402	4.19887842083356	0	2.11466287730111	2.46084569448895	0.247429895105961	2.06888976511442	2.78647626899307	0.262752961109709	5.83133958967972	0.326039961811263	6.70388068721596	5.74353205891744
Adipoq	12.6667687396781	6.57322796673669	0.347546273758739	4.6029127218291	0.43001758757976	0.0677819213795473	2.6155860853639	5.07614152997842	0.0801544867572027	8.06765317159946	1.27120062260647	4.61222970716643	7.72370602284213
Adipor1	6.79657407773798	7.17639200907487	6.00717278458316	6.95274539062005	6.98792420526049	5.6919234248657	6.72330767798799	7.68687144167508	5.12066168175613	7.2829358232007	6.72467801268908	5.82497414575899	6.99627938593848
Adipor2	8.53458789967728	6.10831310630307	5.43536483223178	6.95545262660143	5.11134017668464	7.76812464260785	6.28388277350313	6.21280292786386	4.65823493479842	6.3278862936153	5.44301869454221	4.24747571956374	6.04899699656608
Adk	6.78056077916428	7.07143009841753	6.70649372343479	7.72549948875903	7.84052911246692	9.21650383637523	7.12184404679659	6.16879174915853	5.28035781202856	6.43418447582058	5.27001225287616	4.6007099874904	6.12683331334549
Adm	4.23876242177967	5.33253906143157	2.11617721341042	3.17695113105598	4.21406990210695	1.4431425791201	4.22637801923348	2.2903532875127	1.68948222442366	3.96609888427101	3.28485882414896	1.15521547072096	4.33205193125825
Adm2	0.0438417966008453	0	0	0.0675652129816171	0.0577892657129997	0	0.10655488232557	0	0.0285439454267597	0.248017727642168	1.01639114888126	0.0482610236455271	3.55504016004719
Adnp	2.96800594315097	3.16307290408318	4.41626582522403	2.9822717593416	1.84582086389114	1.57193693177155	3.352321639856	1.63786916800568	3.45283243050614	3.51239309863909	3.84315602521075	3.38725948925704	3.6413344707437
Adnp2	3.18788573006217	3.7127090780248	4.08961408431801	3.57882937617309	2.61012669878242	1.78535261903141	3.34598978553544	1.4143424204217	3.45490150269062	3.59981714128202	3.68730159138356	3.4143293190406	3.42069955551442
Ado	4.03256468301839	4.49959373891162	5.32642432054988	3.85425696076704	3.82408946850857	2.58997606806918	3.74108706999813	4.37466168259603	2.88967870742286	4.58922897509056	4.17005797771866	3.91081608718924	4.21369895306581
Adora1	4.96777561318371	6.85749271268885	6.95052762248387	1.65184242514986	2.48265431338092	2.0233648211979	1.35001914585835	2.89997666699629	1.87403171615494	1.97080869827519	0.0879531827010609	4.08694999321335	5.46540607335225
Adora2a	3.15418881022377	2.35438941539423	3.69501418488369	1.23522300997423	3.185824306278	0.762715551106058	2.00806476439824	0.93133575108024	0.588425672502264	1.59731096394128	3.88000027661209	0.265908961094162	1.00534015641823
Adora2b	2.21498484207511	0.934890150701397	2.71853393016915	1.47580127767806	1.09963837255575	0	3.55404303054143	0.653198599675817	0.490556522289256	4.38466528380999	0.735707277915274	0.727763428480297	0.588323796516569
Adora3	1.16543636774119	0.697488166401691	1.48400550982283	0.643437545903909	0.93842696063357	0	1.40200351398097	0.166755601727131	0.172850737692381	2.77670654289794	1.56657494642317	2.5295108952695	0.872195644423947
Adpgk	5.07729452077675	5.33961337500055	4.43567058526475	4.453700957664	3.62958156177823	3.75872259334359	4.66682237838731	3.57642954946443	4.14640947754192	4.87210778144573	5.95103633336785	3.55110041765129	4.758942340811
Adprh	5.82600557762569	6.58453240746616	6.68296073403691	5.13167590275754	5.43731951832729	2.83057327726082	5.21178676780059	5.10387842232852	5.68242289191233	5.65276807856548	6.0588120485192	5.3230746733905	5.63657888883868
Adprhl1	0.140369363120358	0.177121570482943	0.344632725916371	0.266961197540751	8.94689668678724	0	0.750032821573206	4.12003421100701	2.16525134135494	2.7275278244448	0	0.0825557739144103	2.69522876580419
Adprhl2	5.25370474876722	5.28510198289276	5.02187144652057	4.54142658253742	3.91303200018086	3.6460382110895	4.88952946670044	3.23620022979535	4.59558518381145	5.80514704145635	5.37697936061377	2.64109853560212	5.4075790028675
Adprm	4.55006857336729	4.89745817464571	4.8293061669758	5.15323476456465	4.26367448012587	4.63450761295591	5.14438091875893	3.43354060633236	4.72539622816984	4.30200567851343	4.97521324027768	3.11803888263289	5.87635195282729
Adra1a	2.48408378471075	0.39253628870139	2.66186355382762	0.450477438281307	2.31999878910813	1.45828166400477	2.75625506754377	0.846886413095881	0.103715015474136	2.72999115091557	0.115570827775565	0.0589880069520618	1.35677744239139
Adra1b	1.16479171657055	1.70046796870578	3.21257368052057	0.203947671824791	3.61329709881781	5.09796547382107	0.801182339374497	0.25523497359649	0.076425795603279	0.989819699375568	0.877997774434956	0.480746975960478	0.348601776463729
Adra1d	2.98025601208343	3.5943399724524	5.05402209429897	0.0958192104684195	1.55619865705283	0.0197101133160384	1.08205515328192	0.533099947207662	0.0905575430195798	0.647112043068736	1.75491685867829	3.0902049876239	0.6660998434134
Adra2a	1.10695931000124	0.199530063858929	3.52593603339695	4.76190205152526	0.0222689471576346	0.0124830293089099	0.36435209736546	0.22067162757422	0.111163586764417	1.80631682307514	0.409836548097087	0.0945617366244017	0.687637570232588
Adra2b	0.673145403836923	1.51695511448791	1.23348602653384	1.03877502725271	1.36355923499216	1.37287979245413	0.709574500097751	0.605256395777944	0.711937690730646	0.794678993897406	1.49183861089126	1.01219452240642	0.896355776839601
Adra2c	0.341434804940409	1.01215208328664	3.74688646496978	0.525937619423548	0.135985306088017	0	0.0580286656714376	0.173579735813518	0.494670555651575	1.70154751198273	0.0958298761902927	0.0792080712119151	0.410773555034821
Adrb1	2.51637039080514	1.21108740358712	4.86927594612024	2.01552296766382	3.51391068736116	0.615795996614023	4.82685675906312	0.190078221106575	0.702962934854136	1.71385688426849	2.53199235548706	2.13245141189563	0.871713343731181
Adrb2	3.0864738481589	2.34851491769715	1.82905136584517	1.92796744230428	2.6245312497061	0.881743112951192	5.77879092766653	3.63001543248728	1.97078340792788	4.63635872946246	5.27952400534965	0.738936222461881	2.67829767144934
Adrb3	9.06505511231162	3.0238419066229	1.58370309701351	2.06694372953272	0.0370018004236475	2.09897263794711	3.36816189813843	1.02949175876501	0.0107412507514742	4.07600273791417	0.204205481353599	0.183993563281304	3.4027491756762
Adrm1	6.83125823205449	7.07112249403188	6.54130536070609	6.24294487325452	6.074226826976	6.01606691140496	6.00259820685481	6.67337507576362	5.61593191534331	6.57581529772392	6.40742999792525	6.7107929953019	6.59264516048352
Adsl	4.63918578057664	4.80961754579157	4.29631509395701	4.57869004888903	5.15122776145492	3.11779413104031	4.36772275031136	6.03089687153544	4.25087494763659	5.07880079684281	4.97996913437888	4.27452932866193	4.98982195880832
Adss	5.76903988434417	6.62063049268976	7.14829045641006	6.4357958221482	4.304162876538	5.20480621806289	6.40122368152432	4.01499416248692	5.75333197130062	6.09592115614664	6.31350554372195	6.99516367399776	6.7165872043064
Adssl1	2.9885958679414	4.67554639992756	4.65877148580855	0.912132101930538	6.86344942684155	4.02705556767077	4.18270112799765	10.251482962969	3.0913803045971	7.53541376371727	4.31884902377084	1.77411206842127	7.31892996600911
Adtrp	2.76383240214514	1.22777958773598	0.834357955062611	5.12786660585988	0.404769821320874	6.55660495311065	0.815775185683546	0.32109569997352	1.77200912034381	5.82480357257754	1.4288642158814	4.70177290638186	5.00996274093026
Aebp1	7.02691193693269	8.26574500486852	3.50860274960289	3.60690915497499	3.34325990119282	0.960505693914827	5.00253824766666	6.52213268594375	3.04058139442276	8.33698512981154	3.38856874646622	2.0418436500251	4.57977206421541
Aebp2	4.84880483739387	4.77930758338023	5.28342274744018	4.77712730042536	4.119719958425	3.08635620301265	4.72141197982737	4.15936505602249	3.98480730470601	5.15841503776178	5.47568504396344	4.35394390901764	4.96480356524501
Aen	3.21403754778787	4.2085415226342	3.48233338480388	3.51635945949838	3.28585721916359	2.25414295952279	3.30974301541034	3.92933291605695	2.84234711045414	3.79956416178132	3.80749743620209	2.35197728514173	3.24771062013413
Aes	8.1929106903691	9.84601564598551	9.11622699780936	8.96889813418647	9.46528946334064	8.3314795266715	8.22687608873265	9.61741329052396	7.79969329184428	8.37114556685656	8.31901456815704	5.71739997149628	9.17379537466308
Afap1	4.76258991853891	3.23518691439165	3.44749819576533	3.21346660147276	2.71559070306745	0.42234559822631	3.30432557463239	1.78991960693057	2.95794990549881	3.73286093894919	2.50054911305884	4.55715692503222	4.07402756198556
Afap1l1	4.82593063189927	3.7975156971327	4.41437002489388	3.71017886118405	6.29157802540975	1.59870496817526	7.33983734705295	5.20222141004751	1.75019201918254	4.38456343211196	2.15314799297335	2.60602198288283	6.07119892250968
Afap1l2	3.16932166892281	3.88740499809956	2.92611902655944	2.53716640238358	1.8475870637685	0.579968054621359	3.41534167810984	1.29161603306886	1.49988857190792	4.85350053239889	3.79957327837959	1.06125276534544	6.9156351495793
Afdn	5.31418141100945	4.32484906345863	3.17426389457385	5.80999335416046	4.88207605689163	3.33946030761426	5.72825569695456	3.77328448600875	4.23580930191027	6.81648733552464	2.64603567255162	4.12572820483441	5.85392915154839
Aff1	4.62071305844927	3.75650759871953	2.88358235122468	5.06225776864582	3.58000751449725	2.76646983693794	5.00777074637869	3.78414559912173	3.52424586596581	5.35393892418132	5.07738696584986	1.52432296270244	4.7574820168506
Aff2	0.16673889806444	0.314747096056257	2.85118871094744	0.062160638725502	0.271416106858632	0	0.698139683127087	0.0332140701201839	0.752838209112668	0.75411763427726	0.034960143322978	0.713283558342966	0.133906053126386
Aff3	2.12976461019494	1.48258977949654	4.18365821663597	1.19370951741077	1.29350350332199	0.220342291980224	3.56910334691118	1.0399603949284	2.31110338975939	4.47325293034024	4.95523943647129	1.88746649623697	1.74188854588495
Aff4	4.7763403391371	5.12395146671048	6.1825725956198	4.87166778490448	3.91537915282267	3.49428128065629	4.89421257625619	3.9748990586954	5.01886772363788	5.17390196573804	4.84563829659087	4.60523572682373	5.4101594457716
Afg1l	4.12761013877503	4.79431997930319	4.57092698126795	4.63960096799105	5.58716091493422	3.16747856980252	4.1878610088385	3.81109998641588	3.18020296180026	3.80473021412713	3.24369982124296	2.1327496635277	4.48558278922384
Afg3l1	4.91865775396582	5.06242680426514	3.97526266839225	4.53073703087843	4.62804681386907	4.38791637102327	3.8668957707497	4.68965139679854	3.83865468205266	4.27198577837663	4.35021113771409	4.45246200814131	4.68267930641709
Afg3l2	5.56868750983598	6.09950973583209	6.1788166356155	6.58964682125806	6.37445648460692	5.28155610555581	4.74961515075059	5.4114593993314	5.10134831093122	5.34387631784367	5.42011782156024	5.08884022798234	5.62800545310324
Afm	0.0136260074278937	0.25447226622245	0.07438886675592	1.56394938495183	0.0476822639921894	8.33967115077731	1.04033753724271	0.205272465905707	0.401758146562039	0.310998738835319	0.139760660551232	3.45495477265969	1.33659386140681
Afmid	2.71888795307294	3.88927624368943	2.53907719827951	4.18038720905689	3.12991800215227	6.44886176822622	2.76002945115149	2.71431159367008	2.24319762903718	3.07667711567687	4.93015692222089	2.3716167047176	3.81019028333686
Afp	0.110924686527533	0.0425557254743841	0.0598574991066777	0.0581586695761888	0	1.61691528205985	0.66681148536852	0	0.0132877707470667	0.0771600247609346	2.41314467493613	0.640532837912886	0.255486734183304
Aftph	4.81246411506859	5.62436777725803	6.1629412926686	6.30993230211433	4.24060802291383	4.21412563273855	5.4638174791029	3.803840778928	5.63214057818252	5.73879290506959	5.85443331954586	5.91715731001719	5.65549732549693
Aga	6.13689041830905	6.24356373660562	4.09697559812665	5.46039290107792	5.50457318652651	4.61864547142084	5.40038974809103	5.05288790604041	6.6598094855162	5.52474587043269	4.87294227380139	3.76764719872276	6.48508812069006
Agap1	3.10551452032355	3.69536412385744	5.00199982315364	4.07878926345443	2.56113235512553	1.34214872395323	3.65609556843638	2.27051222281303	4.57201458288721	3.32973028290757	2.54483000591763	3.06706672496137	3.89491223133413
Agap2	1.5093834237355	1.99995301835463	8.18721010589039	1.23016537232638	1.65702895383137	0.413630141122281	1.06669012127287	0.868955381569369	3.05638414413952	1.34831437137127	4.11399990186949	0.971970602073684	1.90766121193514
Agap3	4.91691192668269	5.25362643922721	7.81264430989374	4.73650055897938	4.62353420409171	3.487968275535	5.28422540675328	4.74981092251108	5.2904092329539	5.9555474924257	4.51638050506529	3.8818585879709	5.62713987360905
Agbl1	0	0	0.285332386069866	0	0	0	0.00837988156944381	1.05854574386497	0.0719523460480296	2.04706473892398	0.492713456717979	1.3661920977251	0.907417746649425
Agbl2	0.60392110473222	1.47836292846642	1.52534557886133	1.80288448844167	1.10842506495872	0.123660523356766	3.36911368524104	0.196379222168467	1.59140252747668	0.58340637741611	0.274578120750414	6.47297238947076	2.53363210461131
Agbl3	4.22237720265807	4.577569856649	4.65455423165734	2.64511245786984	2.67181022615725	2.83524780800199	3.86044036761721	2.03359343378068	4.81089334967267	3.51878428092081	2.73906833561328	5.72718870793349	4.45329879690553
Agbl4	0	0.91609294445637	4.02931074443305	0.0986371137489785	0.0647882902188566	0	0.557326198464778	0	1.97052532200634	0	0.0194771590929358	6.43389921284074	1.03245550188081
Agbl5	1.6998975001477	2.79304262943212	3.49371027143254	2.78424451950194	1.39348643032652	1.51385455345385	2.82184814493971	1.3547798616472	4.02167425801866	2.37666887410061	2.48109834537793	7.02191500164864	3.64268287279377
Ager	0.688386405826256	0.459547931780359	0.295033692975245	0.438474822404784	0.108790589274289	2.00379490808915E-06	11.4258496300766	0.131623949186026	0.0948183545703754	1.10031289930626	1.53785743563431	0.282057248318981	10.5062195411798
Agfg1	4.16012126759732	4.84448818367444	5.85365282540718	4.30239504786682	3.97793700109159	2.64803434997217	5.16630145283106	3.74211660279334	3.61918372636871	4.66372085629655	5.0415834715656	5.84196082618189	4.18333608559607
Agfg2	5.32098753130822	5.09856998156625	5.40016358923923	4.45655929038093	3.32610594838233	4.5353875182763	3.83212357743231	2.08232983966352	4.78019916227991	4.5047595459533	4.4743778588331	3.57172963313025	4.10522159549384
Aggf1	4.92740173560138	5.46764462533084	5.7717746999745	5.35157947885655	4.62621490415673	3.86729219431899	5.12370099564725	4.11378372637998	4.63499347638672	5.57075531248803	5.41396792290587	4.44858740990253	5.43453884312557
Agk	4.74227902913939	5.26905089284674	5.73579764593661	3.72566962547157	4.34535532805261	2.73548751938703	4.43504459460578	2.96156828391465	3.53859859536956	4.19518639089287	4.35016537320824	3.84908924626738	4.53001802598624
Agl	3.49190896075983	4.37232062651816	4.24026956022115	3.54678740336694	5.25640918270057	3.53246460208598	2.60124915200653	7.7705600029633	2.82475555217454	5.06594110073027	2.89171410981079	2.61669292369963	4.72195167925329
Agmat	0	3.07384458778111	1.690455292637	0.415332112355791	0.751035929399622	7.37383257342069	0.141425147404295	0.185923243057511	0.212171985597137	0.181053806051989	0.108539712338685	0.268621808682476	0.0769855055681041
Agmo	6.04697323765861	2.05324907000601	3.36036712026751	3.03317211040758	2.77645360143498	6.5015839967075	4.58287071471921	2.33098516028373	0.920099142162112	4.3512934905264	1.91246238733002	1.16116076691536	3.39822973814666
Ago1	3.87546377966129	4.22739735155781	5.03696902427297	4.09706807215025	2.43279430154345	2.74363059761457	4.59282055168123	2.37209848327609	4.1858758714672	4.87329524247145	4.79298260165652	1.92519591664608	4.64567342089809
Ago2	2.11958260683261	2.18444337845863	4.46478754080833	3.15240645671072	1.71970601975113	1.04518200473555	2.49680440332901	2.61949938039379	2.40391063664894	3.46168335618926	4.17624083045717	2.40346722769113	2.26496404148529
Ago3	1.08114847395449	1.23328776518693	3.78449514270157	1.0969199921634	1.15333498238093	0.426136255137848	1.1539233897225	0.783698110292895	1.08412112700469	1.60039473740559	1.8031625167367	1.72050863094729	1.25968550642025
Ago4	2.05300581562793	2.66295561842932	3.33653975022256	2.2576242879487	2.56933476942182	1.3441928101974	3.63242497256742	2.19186496916377	2.12860115744943	4.23321493074779	2.66075157807574	3.55625698272514	3.16953122829128
Agpat1	5.9081877633934	6.15161283513627	6.9430722970067	6.394528319246	5.29304894171025	2.70903265244473	5.25970958601445	5.85141215349067	5.34793716700893	5.23970261567099	5.84842424048865	7.91283573501664	5.95524977149641
Agpat2	9.68822542868309	6.71609587634076	1.42364846090711	6.64271246585655	5.71954727264637	7.345081135444	5.15918519997714	2.87501046145354	2.94492169673716	5.94700077715186	4.03706350128945	6.94947119435249	6.87838288401347
Agpat3	6.90434967223399	6.82751272749989	7.08160630226929	4.99095879440919	6.03154506602006	6.34473211838553	5.82135784581483	5.12287025399965	4.72941623650772	6.07128535999445	5.80756206330003	7.57538431237797	6.33576524589881
Agpat4	3.45069904871812	5.09411237063995	6.06666227687804	6.07674832473735	2.88262842693933	0.795252846372303	5.60227917211047	1.6661778999614	5.27427183994793	6.24732234576633	4.16118192820971	3.87073589508232	5.9109392148223
Agpat5	4.24372622723048	4.43766996944512	5.57909059702034	5.05901883566758	4.50920999961466	2.63415035298022	4.24559724169311	4.64042211663191	3.76215416909368	5.6145361189868	3.96777953407351	3.17905010787273	4.58074226893465
Agps	4.02220760028043	4.15474435068044	4.58898372644327	4.72964900424895	3.62980866688565	2.28657120151119	4.7361636920769	3.35637595471599	3.9121312529583	3.73157772663065	4.6714249790019	2.365715589357	4.12967426530357
Agr2	2.01726682449044	0.293176620491889	0.201952246833533	13.0738823541834	0	0	2.63145782278537	0.187066166757495	0.920205059959371	0	0	0	6.29184509420178
Agr3	0	0	0	3.57308396868056	0	0	4.59727022598499	0	3.87567025668883	1.51709922021038	0.11814909826871	3.30996638003248	4.11358649371025
Agrn	4.04084756985038	4.37191324130521	6.25119878014413	4.73526817115107	3.83867615324469	3.07034612352064	6.192827674543	2.40728314537933	3.79651313695085	6.29924411163692	3.33935302851081	1.85230038551383	5.68254926490071
Agrp	1.37366922170001	3.10108522538383	2.35846947152249	1.95899368238612	1.08468422668037	0.874464562239013	2.39349632316747	0.962552760080916	2.09446763303413	1.95553871067487	2.12369757747044	3.46547053347847	1.6802579829803
Agt	7.9746395755404	2.4702658377944	5.48113805317004	4.87026849098699	1.96295833376699	9.19265928137263	0.743168118728488	3.57147775963755	1.03461585889504	3.69391863445069	0.288380109075196	7.42846195940708	3.43851675420161
Agtpbp1	4.58793298550046	4.39111572056235	7.32135393564634	3.73117793927191	5.97843330281027	2.25747198841529	4.43220939517276	5.03515755270884	5.68099021385511	4.6104663618636	4.51410245424414	7.20735129716208	5.11843066705111
Agtr1a	4.71562516783077	8.55152739671983	0.743188376177894	2.44895265939533	5.07299460312004	5.89630641150729	4.10772103342401	2.69324846767404	5.02493042210159	4.00621594448912	4.41411003437067	4.27822680233312	2.92661594922929
Agtr1b	0.133717602186018	4.73486536515499	0.466108761158179	0.763467858766323	0.110300215181456	0.0530963387894885	0.859767815057507	0.0410942021823671	0.148583843874677	0.240505097526555	0.214290392842788	1.15616016502656	0.189485394651425
Agtr2	0.224521197294006	5.88947817857006	1.01167256043027	0.956450603050423	0.0516931518950014	0	0.0667918987506301	0.182578892696406	0.219273381759081	0.845005225551801	0.047764557097222	0.513786042291084	0.282063990405122
Agtrap	4.29598356068155	5.94024090238756	2.88046668190363	4.36054499234382	3.98836644840324	1.80239977850635	4.70461585960654	2.70367406735691	4.48967812649387	4.62667096667967	4.04835117828857	4.36861087527942	5.13767107819763
Agxt	0.0734936502307335	0.101332951576932	0	0.254596614174957	0.0317771496595967	8.26214713356539	0.0459745863129878	0.0609255389970527	0	0.194740951722418	0	0.0354498334008268	0.0607130789091947
Agxt2	0.516139563430941	2.65602329764215	0.0573125170197464	0.0477480503820569	0.0492707849547783	6.57337994792298	0	0.0539143838020916	0.317488755611687	0.334359575790068	0.0475055637453732	0.263481153325813	2.3319986745992
Ahctf1	3.71785104994647	4.14836667835923	4.75160140301557	3.94590270063789	3.3282601593001	3.7949438018989	4.19473688882486	3.44170426275228	3.45756769557542	4.36531721260353	5.18815231414144	6.57167186579919	3.92770593111605
Ahcy	5.10486865687709	6.30749999468386	5.06886948034707	7.24083541924092	4.48949359315947	9.97748438063846	4.41245098808034	5.07947762144808	5.15872989935433	5.15984859220671	5.83451585097883	4.75619548143174	4.96965121053874
Ahcyl1	6.29997593294023	7.4058912713306	8.48312631962159	6.73143474755175	5.90086153265566	5.6801364850023	5.97534472621231	4.7180416665558	6.58937630123311	6.55987879255237	6.14516255623927	5.57950134466239	6.70078180056401
Ahcyl2	6.38534893517329	5.97888474143295	6.8887629814702	8.60278400183394	2.98285934112297	2.74892580985059	5.42891793666928	3.15820896699903	4.41885460752217	5.33772571546704	4.44161035424169	5.69047371121229	4.82196227495164
Ahdc1	3.33125693455036	4.14537252311078	4.15990751871126	3.15470026622506	2.48099975721128	1.65753778246645	2.65222762738164	2.85930845892482	3.46068879217083	3.83935749187038	3.39025413700854	4.77952345603687	3.99412537753455
Ahi1	2.3364755104434	5.09642760443872	7.85904535596513	3.22005466472801	1.62504940211397	0.62635554477736	2.81697053080695	0.922895134178826	6.20026718550789	2.99147599422994	2.72818393523465	6.72816390701168	3.53722739606768
Ahnak	7.34857610197573	4.5141930895918	2.68337277438883	6.07273856759743	5.66830588997729	2.08355830122922	7.49210400836651	5.17482228871034	3.2232707885973	8.08415952773085	4.91105919815998	2.09541238057288	5.73554638337096
Ahr	2.93659045129857	1.74974959587683	3.05504496800974	3.62927080549515	2.41869910077204	3.91401361082281	5.26589676060649	1.07530965517163	2.20150505456868	5.40099077310722	3.67535260062226	0.971407826101797	3.87732776863486
Ahrr	0.416259668636923	2.03365062427642	0.806593403708693	1.22735624549256	1.20041079854917	0.0829913539784615	0.218096172455865	0.031818175683164	0.772093813953753	2.24629358000988	0.722740843423285	0.320505183565185	0.213909636724036
Ahsa1	6.9813464508765	7.98592219466064	8.04291673180641	7.21078509340749	7.49402313274146	6.8459053326899	7.1117035248107	7.42862177289926	6.82035474424081	7.35872373959164	7.26942467129731	6.10623560927454	7.53648625598923
Ahsa2	5.1583233037441	5.9619847208785	5.5121974523795	5.07116740309091	5.08989538253999	4.54986693646941	5.05642022238524	5.03567417640413	5.02856247948479	5.04384908233703	4.96698876689506	4.99404457327823	5.26427322412094
Ahsg	0.831549441629478	3.80473216656249	0.00622425492736528	0.0841875876015386	2.32015854483829	13.4674871999512	1.19645643124528	1.12994364404617	0.0842451000254353	0.448331519430008	0	0.176213900702176	0.802865964024411
Aicda	0.0452846172551188	0.021063935091321	0.0560934078622999	0.0809041527423034	0.0130024956909736	0	0.0999229499562778	0	0.327643726556368	0.0439606851455585	1.32183213231477	0.0173517332955277	0.0165943766153933
Aida	5.69549194232332	5.48157654036233	5.65143536228083	4.80905476851636	5.16975640990734	2.93315121619519	5.43128275323616	4.25594201200848	4.68109571458979	5.63727257405514	5.83920577558679	4.5758017897709	5.37056222247632
Aif1	4.50211989535556	4.05065970095879	4.09356473942762	3.58487241176256	3.71170702261972	3.32391988965312	3.60272432484564	1.14232504904644	2.43133555845383	4.92243405141477	6.87728812103964	9.56939276641174	3.66511787382936
Aif1l	2.65283107345907	4.73948100355335	3.11707062224948	0.722300195396748	1.42751923616416	0.178553832517063	1.89506379217733	1.49493168093101	1.09577122063919	5.24214498134622	0.724499079787891	1.30834407141723	6.9613520307679
Aifm1	5.76141204404992	7.25873054839427	5.15204511892551	5.98059058752197	6.34125228098324	6.39977725308869	4.71408480176396	5.04597263908568	4.39415180858543	4.85994795791605	4.98918068024559	3.2482863058134	5.78148764478003
Aifm2	7.64339249639105	8.4128599671687	2.96577176528825	3.75023373457809	4.17039773361542	4.01737435905903	3.96357089211159	3.46853624715872	3.14383465640642	4.3460179719904	2.25722320388517	4.46060316408594	4.73580436094611
Aifm3	0.479436975631847	4.24166956163085	6.71055981640337	1.20068686231152	0.0418110836333476	1.43528217623639	1.36758591627585	0.103326204921884	2.61667547962136	0.568276489570781	0.217221658782795	1.74674528916014	3.53801239376668
Aig1	3.9088192328995	5.30379454972341	6.40766640822737	6.34985084351589	5.83450875303343	4.1706386857509	5.68443012154973	3.55245558294372	5.09136946047499	5.10008464068902	3.92337121953781	1.57691719809484	6.08114108560295
Aim2	3.33360647567518	2.60147666674804	3.62352834886626	5.93823731854289	2.76112161331363	1.97818440582901	3.71636112073418	1.23971840469964	1.47730230984634	3.60746971812536	6.63775461364051	2.68618085362642	3.76815400960736
Aimp1	6.16770913682463	6.93477512569027	6.94013075123303	6.58255095693263	6.88198788927657	5.58174466592153	6.2283523027842	7.49269625927603	6.14324763841365	6.84781937229356	6.52435165140582	6.88643723524326	7.16168644499526
Aimp2	4.90315820018077	5.62171713037233	5.6946534503454	5.10321125598178	5.33051890131119	3.54643645420565	4.64685039405424	8.35251945800429	4.35935992249044	5.61613108481539	5.16940978251535	4.75378374288253	6.8181921962015
Aip	5.88701187648965	5.99781909868456	6.17553720096439	4.99223501707816	5.12209763913614	3.60269313075603	5.75976037929761	5.70854651121897	4.53775426063143	5.39687253063481	5.90196335723417	3.08075240484027	5.43919415737125
Aipl1	0.272224978345229	0.139418746780415	0.127846075017514	0.110929358918725	0.0649234698029693	0	0.140109035054075	0.061741029016057	0.410148466782824	0.125557092514156	0.298583838583344	0.831045533335233	0.252787868120618
Aire	0.0126026306002506	0.0901175965772439	0.412492793055053	0.231229444240731	0.0226977496615221	0	0.0976123738743757	0	0.0663650417903634	0.0809447854132733	1.76585465222474	0.787064667302835	0.0945709406335012
Ajap1	0.0288883341541941	1.29894753422304	5.25463138685578	0.60460832077124	0.0973370543082946	0.0158986804292631	0.491668699179399	0.372356647258208	2.37690600485002	0.515638152292546	0.0553604675620773	0.0398679860141058	0.17880987975919
Ajm1	0.362016420427033	2.19021429054921	6.0489752097823	0.471143507314634	0.129257770530181	0.0445470305053426	0.109106790434129	0.0510754914561989	3.54306252996692	0.898413238944236	1.66355793405642	0.0895583300454018	1.43295861170136
Ajuba	3.98838734337885	5.46770068207749	1.7685961139411	2.53920195084306	2.55447351807695	2.01458768105125	4.5546873488577	1.39464128498802	1.93557673889416	5.9207498193594	2.562796936928	3.27418542912224	3.49227955642249
Ak1	4.21421226548653	5.94640896739353	6.91599880317229	3.5511505717209	8.60911335522474	0.260102116986977	4.40788470885726	10.5919341056762	4.45967427330064	7.72833331199429	3.18959397227832	7.37031871420319	7.24197975303702
Ak2	8.59577489363813	5.93450946798335	4.16252947282759	7.54473977039085	5.94290437225947	7.33547066825811	4.87354843977783	4.72038382052115	3.96797936776056	6.06435574122887	6.44690677115771	7.02164455774342	5.56320171677586
Ak3	7.98827445491679	7.8758074072294	6.79273693214883	7.49706353897256	6.60853263209723	7.95182062558605	6.89931775619737	6.19800725856181	5.00990188704143	7.04252924440587	5.90272239858878	4.4172598630579	6.92981883830315
Ak4	0.908841307552081	2.83850324443316	5.33802894153238	3.2383983420026	4.03616535815813	4.24746674127315	1.24322749703965	1.7365590326524	3.66943400534729	3.75609476430868	0.247306705898347	2.17663668179126	0.880287895257272
Ak5	1.14595159481118	2.32035811976386	7.38177870992569	1.32011368404251	0.110471920369395	0.113239888248338	0.584699006819141	0.159524095313489	1.09796379889936	0.958855845159473	0.19475654450981	1.63875174553349	0.378762205714947
Ak6	4.79681751649111	5.52757158892052	5.18167448548481	5.10728018752319	5.55906685798802	4.28918467495992	4.88183161671149	6.581597405532	3.82429045273258	5.46410286754096	5.04874172821348	5.79143849942406	5.51307141375289
Ak7	0.0155127305698071	0.312113200161439	1.81061711490951	0.493044991407181	0.10132651570953	0.176933435651726	4.54468382808565	0.0809144006637712	0.361378142879337	0.0612056262697775	0.445034610937125	6.45238736148055	2.98358810304561
Ak8	1.59036063540888	0.810823884946676	2.11474177168168	0.18337534030871	0	0.0356642631179992	3.46355922319997	0.192787399025427	1.9831062381604	1.73798821057629	1.42585589554279	8.25793337142277	0.955576452337728
Akain1	0.0174235529246722	0.0939318410866333	3.80907274788739	0.038494181939275	0.0789263333213585	0	0	0	1.76913374797799	0	0	0.0944055343918764	0
Akap1	5.25292134286775	5.87942930273969	4.72259915307668	5.51123019697815	6.0666988479187	5.35543247135809	3.8421579748868	4.97762257789009	2.85933285740037	4.4611084572025	2.8163602428997	7.18295182112871	5.43309311896086
Akap10	3.97827363990847	4.05303795247578	4.58150625456475	4.19584339663484	3.21264793313374	2.46040791872785	3.76946362839054	2.40593932780276	3.15903853677648	4.09063419771348	4.6089132242996	5.92807082068381	4.08607603215276
Akap11	3.57136037891269	4.41338252479086	6.73815123687726	4.09925475413533	3.52670174065745	2.71561448771521	4.31574436022665	2.591757579902	5.03192871175597	3.87468931535435	4.02888646309338	3.78153173854109	3.80789634156305
Akap12	5.84991785360193	3.61250771985667	3.7276651719159	3.7341384912198	4.17688117442281	1.21082163085706	5.67700421374713	2.37192397070346	2.01747017878254	4.54334560877596	4.36454764612556	9.76170589475806	3.87556448825968
Akap13	3.85452757312912	3.82223065757909	4.12196274249013	4.59907335515406	3.35074939653332	2.73624976895679	5.02300779555267	3.39601466815876	2.90508433421528	4.53296335112831	5.68754471823255	2.18645398635839	4.3732586025201
Akap14	0.0147109523317139	0.021433153500724	0.675155659056704	0.0382895732182388	0	0.0299823301520342	3.00787962080781	0	0.0514329983771332	0.0439894836707276	0.0728991111307084	4.4710238321823	0.0577099242284998
Akap17b	1.83556679159982	3.27238879921487	4.0894120099792	1.50212645785074	1.75121201792809	1.48357520416471	1.89927108115011	1.20988948562383	3.34793990444891	2.54867271893546	2.37057300793811	2.39924467638797	2.78065444717373
Akap2	5.46792079485702	6.07430763023445	4.81108183708622	4.46888824996117	4.75408187842547	1.7920695687828	7.53244237928356	3.37042710090844	2.84064376808486	3.57212747504596	3.9036328342643	2.43314344665449	4.76810785492987
Akap3	0.027181724710521	0.0407242615972621	0.327057670750849	0.0404641620727762	0	0.0232735961102842	0.0398740285535394	0	0.424724286559998	0	0.0288263293398856	9.45053507746282	0.0776921584476384
Akap4	0	0	0	0	0	0	0.00836847029212463	0	0	0.187750876235648	0	10.4999601892292	0
Akap5	1.02610141342297	1.02251771741986	5.70059045468275	1.0126682081996	1.86741055385219	0.727248864903135	7.28582713882243	0.418380957857256	1.02437445992997	1.18916109180774	2.01930268297011	1.00918273433668	0.963449885933167
Akap6	0.19312954715637	1.11960419902998	6.04818876549485	2.17160210653686	4.81083674648724	0.0258237070692649	0.503928290517597	3.64931615806953	0.472454565964835	2.12792037638643	0.195998859837767	1.19631302948938	1.56730300103941
Akap7	5.49800901501873	4.87501675967836	5.91729078565496	5.40936092328897	4.68316370590728	2.26309405959065	5.10928486920414	2.86099753038794	4.16417758907923	4.30313393005125	3.98853506501337	4.12127365742518	4.01848085639917
Akap8	5.3246802975979	5.86662915623517	5.89837310857435	5.46114601658611	5.24955985520604	4.06415691380725	5.81159144204634	4.53432561533022	5.17835553733677	5.72385033146096	6.56162739801024	4.99828008913121	5.76893922723109
Akap8l	5.91109287349208	7.20146851819221	7.64356934619741	5.68808622143943	5.58327963369708	4.90206949902116	6.47102992521232	5.28798577337257	7.14261406233911	6.24337808627004	6.94354404289454	6.40577562879394	7.17853908177071
Akap9	3.2901757333009	4.30056663899993	4.65642360145217	4.8736697426895	3.04015155424835	2.31555750593413	3.88180960163559	3.49694882075563	4.17615651701797	4.14454837052363	3.80419978497233	3.93901880772813	4.46127865464388
Akip1	5.27455782017334	5.47017298469123	3.18179379213036	4.74978645458711	4.43165114192821	4.65826140243278	5.49008871621332	4.0893008038684	2.98349094782795	5.07362826338	4.87767900233664	5.39725679354882	4.89595553438864
Akirin1	6.46943667998815	6.80487964871063	6.76533312975475	6.42235948519612	5.4531265824801	4.69035800374504	5.88949320206819	5.53050893155227	5.89360041349578	5.81219672440943	6.62902030936835	6.73013832804278	5.81169522210413
Akirin2	5.92175524626322	6.45848823902924	6.87833476229242	5.77976340947803	5.78091896787759	4.52173529425203	5.96002921831506	5.22745896025055	5.29166677906606	6.13035563208144	6.04429708741182	7.44330787929126	6.16796736891138
Akna	3.20707081509044	2.70002032938171	1.72299829136088	2.32476972205219	1.77932207200549	0.92811854718944	3.98684793555663	0.895106814937184	2.94023509370419	3.24141472115163	6.72138369001592	5.23855386630278	2.37413158926451
Aknad1	0.190794177194468	0	0	0.238866795459715	0.0239286208239951	0	0.0612840160496038	0.134159043031542	0.0775785257223524	2.65024908908413	0.45935904939563	5.43121485158767	0.0776816547241021
Akp3	0.0837063777253432	0.0875510880138532	0.141519187835764	0.154251721887518	0.116816227105873	0.0471479957706633	0.274272017527684	0.0762929896395855	0.208388939942734	0.35850702475562	2.18237826471287	1.66406881681063	0.232107843312408
Akr1a1	9.41646435373401	10.1594528713606	9.02911577197762	9.27726099194656	8.07736040527483	8.52415858593645	9.10298346956606	7.82232180895071	8.38309964543539	8.90563187820247	8.47171709572052	6.46508840480357	9.29968562199677
Akr1b10	5.45730943618837	8.11241816213392	5.16605188350936	4.47504255690447	6.63747930420731	2.11605726216093	5.03857030719384	6.43479946446834	5.13914918171888	4.82648868557196	5.22438612539329	2.51434439927659	6.07023890125068
Akr1b3	7.87067622988639	8.98381939375872	6.34007386635361	6.70254956173792	8.66532011491174	3.632406559427	7.36374890396522	8.18815362962115	6.34961981719618	7.30769500070181	7.27168213731015	7.63662026300572	6.97997053287803
Akr1b7	0.377667782810625	12.3785864094495	0.105736932762142	4.05396855522228	0.169859300176563	1.82078430332497	1.93879292269688	0.0244525472436672	0.338422896430606	0.0753168662807526	3.44716532779503	3.39482062741644	0.401586585524809
Akr1b8	5.58794971222605	7.99280851978603	1.5756891768339	6.91166085244186	3.43983271263745	2.89226122540453	5.126727779057	1.901622495388	2.57239186451624	4.80511519923941	4.1854398974388	5.84332146578904	4.11093862820413
Akr1c12	1.92343497511125	1.27830840946218	0.0677174992399265	7.88390142882376	0.131775095203106	6.90998555361357	1.10889987543225	0.217459264277351	0.0855227244088084	1.09734132398236	2.418519240802	1.44363133157989	2.1015757012563
Akr1c13	5.15743330530856	5.81679456611138	0.546627338884754	8.26931532945313	1.40988891481355	7.1878335435888	3.74054986399978	0.53122681347918	0.926651298381029	3.47275165776181	4.25029781989992	3.44207888815107	6.66491613709227
Akr1c14	4.86690683729105	1.63489805827807	1.84452978016592	7.51422481112538	4.25193536678931	8.62407586636649	6.63623576053636	2.10778998157655	5.3138761496429	4.1897079004618	1.28841817415289	1.52801036173596	3.25018276075042
Akr1c18	2.91166817678312	5.99945283668235	2.60815010021381	1.83641473886394	0	0.898280468961682	0.337266232362143	0.712842923027983	0	6.58260444573266	0.259359744948043	0.120058039096287	1.65235490640425
Akr1c19	1.20003989567955	0.702033633429063	0.123328060541733	7.85364338695912	2.62046448426543	6.78829236148802	2.97126231460315	0.291530328199684	0.0174397033526447	1.95860203827447	1.58164644748354	1.19975217061397	2.28533713296331
Akr1c20	0	0.632949248801657	0	0	0	7.51204435476922	0	0	0	0	0	0.133815044597715	0
Akr1c21	0.708753913228927	0.727982995964127	0.177847688108389	1.55407723184835	0.123282357037951	0.249517658075111	0.572150588801221	0	0.390963575109957	0.582538548498579	0.0907266908273043	0.755173152930044	0.616582221293237
Akr1c6	0	0.497777502205421	0	0.0282308171012113	0.0377163377748621	10.8573133118113	0	0.0623239434666419	0	0.121256021507122	0	0	0
Akr1cl	1.81251131029277	11.1698215522536	0.0499509153574358	0.0327354548315878	0.159755919765081	0.0777324852539777	0.0752396184120354	0	0.770988873207315	2.53255106228888	1.8021622898936	7.23040608675062	0.161054649927561
Akr1d1	0.708207563915863	5.85590790018832	1.52287461048308	0.563426999206142	0.476796910276622	7.66766605203493	0.627582890167466	0.403601006711481	0.952248076299545	0.815325942688893	0.961097414243299	0.974993960041623	0.818938300658152
Akr1e1	5.77547164152091	6.12679587381447	5.75403879283813	6.10411686538175	5.56972516263907	5.53721494002733	4.8073188917106	4.84816507127531	4.9331576449171	5.09872793897067	3.89832258562549	5.67992088343007	5.48197782504193
Akr7a5	5.35434859319043	5.95265721855303	4.76805904582985	5.42167319116846	5.40455773982219	6.68640506184248	4.4865775528717	5.18125567586076	4.22365874496724	5.03873111592044	4.86071278670414	4.62575929263414	5.81643634613681
Akt1	6.60847695507312	7.85250162724805	7.03122428494886	7.07594499451012	6.69972710758512	5.12698147787224	6.74414386364813	5.14665035124211	5.84888565898128	6.79528309553957	6.78383822738311	4.46173287656007	7.14508263230953
Akt1s1	6.03347525098316	6.42852831180766	6.00620611544334	5.78399452744284	5.61365050767174	4.94487251984258	5.1901483723597	7.06213676934852	5.32042860991419	6.21911863043682	5.01785229150495	5.06118242431569	6.22862368289174
Akt2	7.3759193433365	6.38457476698296	5.71554952186962	4.91904051529822	5.99141239559844	4.98367164337394	5.45243575248332	6.87923053816239	5.07916885338701	6.28825318765874	5.51868608893902	5.00260168777123	6.95079338822081
Akt3	3.44754587802155	4.28189360021274	6.76473758928052	3.39402177623513	3.42895558240277	1.12523964179288	5.15164441177856	2.36793610765436	4.49358636558955	3.69158756996115	5.09873093076353	4.12578367957577	4.58577816148717
Aktip	5.75267133979325	6.05085981496254	7.26132296612186	6.02512244002945	6.11733593480942	3.44481473588157	6.18232364082998	5.9636161326012	5.84549895341956	6.29146835658902	4.91839930623498	5.58409319478293	6.48102695806596
Alad	4.78455137498498	5.51870473803451	3.66794757410937	4.06396072125733	3.98015456300271	5.20196717831755	3.91932137081594	2.49327566193811	2.85496423444172	4.49672548578076	4.72112617112166	3.37611221614026	4.73265199705886
Alas1	7.42246221977222	9.55513418120222	5.62360559296153	6.83801957636185	7.14315003658634	6.97472178374493	7.71490436083436	6.08998657819227	4.58337521847513	5.67816710419988	4.7520210880458	6.01629057628679	6.97979917826905
Alas2	4.19351698124028	3.42942995618997	1.94096549014936	0.906206608767758	4.52052728112505	4.05519472425431	6.27240484696245	1.37927441477389	2.38181797853859	1.79517912168786	8.90442407505231	4.14151299135211	3.00393545012696
Alb	4.58577049069672	4.37664933404608	0.362803929636215	1.1671841157153	1.06530851053131	16.1411636827988	1.12050690074024	2.90941579328682	0.00446585197405417	2.18942318844687	0.0451252468250267	0.0333234798154311	0.333542785673764
Alcam	5.62137734524574	5.89907128313283	6.77179008660691	4.56471287208997	1.32326461184596	4.37182461068783	7.90115305468922	0.644177747461891	6.00723105151757	5.34694273298201	3.99353520443775	1.7708860239585	6.31568247131804
Aldh16a1	4.00445760278151	4.83005689976683	2.47758939153569	5.40927728571604	3.11407579634669	4.93073537109955	3.99545286627467	2.64336986907394	2.56340909656017	4.34653630128609	5.09566354621421	2.734339305421	4.53115226661145
Aldh18a1	3.42821631838123	4.37947552132822	4.32872256824917	5.32308398182809	2.88787274384734	0.650568656922618	3.14186997428148	1.98094579153206	5.80882938763194	4.61530518042996	4.93694082011765	2.0794042717657	4.74462294455828
Aldh1a1	7.70167172157823	6.88863404423192	6.46350827697711	7.29839392608017	5.24927234616864	9.7896058810691	10.2688418747384	6.14682128624409	4.00620248382148	6.80994653973318	5.23685019664169	7.36760427449606	5.53543160509611
Aldh1a2	4.07682686391459	6.16986031320264	3.44123026010821	4.14835759264085	3.38023813589128	0.22112687747602	4.60545050582841	0.521979593713313	5.27931434669624	2.13379577082427	0.908667352206273	6.44833142094278	2.96589922949301
Aldh1a3	3.86589901653403	3.92360978133978	0.856180603100072	2.11836800571019	0.912000923746697	0.214139956100546	0.705061279598091	1.28396934120466	0.159800151469058	2.88201307073403	1.72766625354685	1.35227143335031	5.61541454825664
Aldh1a7	7.48865498383208	4.88063679555806	0.916727115785854	3.79577335799661	0.358244707671202	7.11640213220064	7.10093837445392	1.29297229458358	0.21511588859918	4.40007986361651	2.34099469012643	3.3074288060298	4.59063446979801
Aldh1b1	1.17427714583282	5.50283999183175	3.28025891280036	7.5009725156516	3.65986270246406	5.73376106621687	1.29368498762757	0.389479432182349	2.18096588333521	1.85808007767656	2.90253126497766	3.43975256308585	2.12718737509024
Aldh1l1	7.36485651629359	6.79384802447033	5.606731015125	4.68728468013527	1.36234535731159	9.04375608050029	3.64327140851312	2.89892994214402	2.44782985608994	3.65012635391487	1.9653196601248	3.63193230691875	3.29232228116217
Aldh1l2	0.424991814011832	0.967499729022873	2.4300672700597	2.16110648089452	1.71383585260143	0.0886594756740831	0.601097649090974	2.21755265071109	2.14724805174639	2.82382560316008	0.666178667514902	0.875238823166844	1.1202896108934
Aldh2	9.2436012931376	9.10309260617247	5.8311218305272	8.03872897917024	6.60982697193342	9.7042675126184	8.58789053641331	6.11618794308506	5.37433052604408	7.28503428905714	7.34449479045756	5.76378422938373	8.50846688935528
Aldh3a1	0	0.297926821332175	1.5929246773039	0.744178387200877	0.60671079670617	0.0462034490277201	4.20098912471485	0.404242485289673	3.33113660073023	7.24093916568549	1.55617789058941	1.78928953605314	0.562241116461741
Aldh3a2	5.64614177219494	5.89218603062745	5.77814089262965	6.69144854942073	4.59913033623345	7.37628360501994	6.47667851423826	3.51765629116614	4.74998571738657	5.94722001133991	5.34663440103972	4.45725751462637	6.21232543440447
Aldh3b1	3.99136474545177	6.24008484902864	2.77398006478537	3.58860520886987	1.99355558725297	1.56399348118165	6.25233665218742	1.22982792082337	4.30269265561897	3.53197355702685	4.98861860155882	5.13329312771922	2.85082049850295
Aldh3b2	4.63478150816798	0.791244804433503	1.16851761083557	3.25294499660862	0.0284524314159794	0.0872732724727205	0.298791385614877	0.442358644436431	0.25465525517944	6.34849605690803	0.735882869975241	4.41820423935879	1.18733555639067
Aldh3b3	0.578093078636006	0.0656850572266525	0	0.318797660635082	0.121004809818058	1.3476739193668	0.0219990228888394	0.0204601683920032	0.0115653033616101	2.22116233416671	0.164541772295841	1.06079302094331	0.0586953779178323
Aldh4a1	5.63069871938258	6.16301536033015	4.12672675246612	4.05332809877151	5.43104389426709	7.17928010072871	4.25118163058607	6.2090928453445	4.23397752687526	5.28162581058772	3.83324452366917	2.30950805780593	5.73259541115616
Aldh5a1	4.13294486963084	3.92326340688826	5.80377456833893	3.2903107845892	3.94590443923788	4.46656615190126	2.62590383697792	2.40871115491555	3.35187904649512	2.82122916760113	0.931241654258323	2.42087037007127	3.51483573360592
Aldh6a1	8.69722508741164	7.35059675712617	6.34590597396434	5.27082341095405	7.21256775925319	7.93212376247663	6.08207798171747	7.1224739601379	6.15053047970539	6.34584462476962	3.84362846129019	4.93348152126152	6.73860346718797
Aldh7a1	5.9629842590056	6.11557753743401	6.16438834083707	4.45073145257336	4.48516564398584	7.71175373796508	5.19281898109935	4.71719540119462	4.87857766229576	5.15105236102162	3.44870929592169	4.92456670732539	5.97107680682188
Aldh8a1	0.0998589752402551	0.336179146483465	0.365897599210999	0.181671886592478	0.119281714950006	8.02642620978394	0.180275398777713	0.142702998570891	0.158244361287596	0.322414554664871	0.376962777746506	2.4165027189676	0.132503090189433
Aldh9a1	6.08391503942461	6.31484671480318	4.82681307335623	5.61891654227652	4.95399112253247	7.13415391335265	4.85261500840508	2.23426062608582	5.53925603609226	5.20313240785675	5.41018399831734	5.3912741237212	6.04213196895859
Aldoa	10.509837670535	10.6780252418772	11.2588729882822	10.0884799231102	11.3412762717993	6.13399592317364	8.8765231301391	14.4264103378586	8.87965959341071	11.9161655162723	8.39180270011623	8.50767826068048	11.3928869202105
Aldoart1	0	0	0	0	0	0	0	0	0	0	0	6.91968086962306	0
Aldoart2	0	0	0.158742915060191	0	0	0	0	0	0.167386955131325	0	0	8.51890786890083	0
Aldob	0.162123226195727	0.952293270005571	2.89604707462892	7.40767525931262	1.35867719550373	11.6050548650272	0.101223500303463	0.801146770485338	0.667464054526061	0.0834004145687731	0.0315789717692161	0.244549408101465	0.251364795127693
Aldoc	0.685019247601365	3.974756222447	9.61809372844443	3.2765953802326	0.185645761047403	2.75464706584851	2.4677338708087	0.345046814556211	5.49521222766329	3.38739131629212	2.14040328073561	2.03385436377816	2.22408404660746
Alg1	4.93963399235798	5.35673129447685	5.12137625254672	4.46848753038109	4.16368177988184	4.01763987967358	4.9643463484745	3.76526046530828	4.80688741851822	4.49578197257486	4.77966475680676	3.4276338146447	5.44486728114246
Alg10b	3.66746110000238	3.93634385428603	4.8877234897057	4.29977121892933	3.16557712873411	3.15906879586765	3.99276867679794	3.01425249744415	4.01063498713096	4.0781375886612	4.04196562084172	2.75530415188413	3.85460328438088
Alg11	3.15789330202591	3.78761927031443	4.01519895192919	3.45689984534963	2.24503851995401	3.23748717573916	2.7140630294482	2.03216995088247	3.35894305482893	2.99194986652017	2.39301356528652	3.06531372743231	3.12455176528839
Alg12	3.71251362583147	4.50354680932022	4.03831056268423	4.34726701572298	3.29710076750873	3.01338757829312	4.10077642814885	2.51795516758254	4.06258367196902	4.1228485612545	4.53722176885207	4.80234346421169	5.20192983926565
Alg13	2.8827432374811	2.86172059441917	2.74717969281797	2.75337709219523	2.50069381111873	2.31634777360345	2.13111989909961	1.9821769558697	2.64088707547563	2.79266068521093	2.27600262905627	1.63855300166518	2.72929003681329
Alg14	4.64472152690227	5.46325908118677	4.25077489941343	4.58942207207525	4.14370823774263	4.13507119363124	4.94927582104717	3.65923636449616	3.79625665105514	4.53657812090366	3.39213415067728	2.20562518985807	5.29548354133431
Alg2	4.84669331949577	7.53344281264153	6.98373657079169	4.38265628000148	2.93798734366196	3.38792929567257	4.2286896832023	3.85941272548396	6.65394711295364	4.15201597555084	4.40907983198121	3.0998280576427	6.13363787277868
Alg3	4.41910751304178	5.27325294401959	4.18197338513226	4.25375028472566	3.66892667602859	3.36052333994688	3.91271294343503	4.31807141403669	4.36750771224645	4.00790634967527	4.25021537540159	3.61699539887148	4.73379987910688
Alg5	6.03597736071389	6.37467501451859	5.144252893424	6.37902394847703	4.69520496453479	5.30388722962107	5.4978604424139	3.99187255651724	5.34000087777124	5.62483348518651	5.46897211396181	3.70750544252608	6.51552196021456
Alg6	3.29763939002921	3.80130792212498	4.17110817983372	4.52647651547115	3.25079305586233	2.83527955008804	3.58878194492944	3.14262881750358	3.82502513742117	3.55072206447363	3.45741990180221	2.41239661594737	3.72671848385171
Alg8	4.11530958146068	4.50670004986466	3.7672746662706	4.37124412212513	2.90732583779957	2.90734851360515	3.46796257814109	2.63928864942415	3.6995332420237	3.6350963986282	4.44391181484013	4.90510066277775	3.9519869295709
Alg9	4.81530316345006	4.34068859344921	4.20396449150313	5.14757444972203	2.98611361439137	3.27234877538346	3.88322026274881	2.86988580172887	2.99592314049323	3.85362269292357	3.5882914211876	4.76464263030912	4.40265734109278
Alk	0	0.0647017449956136	1.77615566783578	0.308805029029187	0	0	0.0166487284864322	0.0129007752486664	2.12908510611536	0.0113111858088925	0	0.700880639648006	0.0653000068977779
Alkal1	0	0	0.270834369656916	1.64111864371339	0	0	1.79832592202925	0	0	0	0.0587686995384457	0	0.531848083748063
Alkal2	3.15411369004596	0.167909430605616	2.31512404271559	0.552829185296763	1.37694306372038	0	0.127642174957448	0.972352253118108	0.340172028245883	0.973856368605051	0.173240706960362	0.0284259722384177	0.739979309383105
Alkbh1	3.64679875896964	4.36970082967273	4.1262662295789	4.21885445697579	3.16938987479868	2.6137761308255	3.85255148849206	2.55388840706939	4.58726924719639	4.31093716827388	5.20021399686183	4.02098244252113	4.00136130341868
Alkbh2	3.88593876565927	4.58383665293205	3.69330413742316	3.59692139128645	2.74396810425767	3.00122885466126	3.35438041128808	1.35550414194967	3.91373618683571	3.53070420776823	4.23275493775719	1.96230903509721	4.46112200211226
Alkbh3	5.84841784475934	5.71959878187815	4.56200724478422	4.97331876044846	5.79966685418183	4.55709558231864	5.11104103875799	5.75519877079477	4.35836639455663	5.29326101528453	5.27583918631302	6.44843578403298	5.37037484951773
Alkbh4	3.08920846866537	3.39743068991836	3.37706418916928	3.64960696654476	2.60836503444477	2.10938017833011	3.26996876145182	2.55790035592934	3.39258286217355	3.44558552091017	4.31226497359914	4.06439275470776	3.65575575779816
Alkbh5	4.94647388773354	5.26327252550683	4.56735528822381	5.2232571248297	4.61160736332757	4.02630107012945	4.82474149258121	5.95624481738655	4.79981617699579	5.03553793460167	4.80214107568528	4.40350859335569	5.59262911872996
Alkbh6	5.3465966627101	6.650174685555	6.45822801217859	5.58598842360772	5.19786720223836	3.64192849658274	5.57421475933378	4.86764892201537	6.03624740850276	5.65620981470231	5.64306350252652	3.98177560580903	6.47283755042511
Alkbh7	4.04088419585639	6.06451058914247	4.93580746048674	4.68250237108826	5.95289827363901	3.50169618336724	3.98319304493433	4.52726004118549	3.70646015626149	4.07588082550899	4.08428910750937	4.64360133189077	4.92631989289892
Alkbh8	2.71970747745101	3.02901225618254	4.54549828743155	3.12659904251938	2.60749155950802	1.81177063567468	2.85526343841789	2.26183228998312	2.60474465235833	3.09936037929295	4.0603634034486	2.43388570103679	2.89711654834546
Allc	0.0666215017265641	0	1.03511481090515	0	0.0302012477560025	0	0	0	0	0	0	9.22849728944475	0
Alms1	1.12482290696792	2.02540376903246	2.59626964295258	1.58014574549892	0.783311038157617	0.447809699494235	1.80557581925008	0.304582249911773	1.80928951089976	1.89340547875061	2.15424690290374	5.54092965557744	2.37443651312626
Alox12	1.35467145749246	1.99166780493207	1.04646167952226	1.50465940506863	2.16769512229935	0.597462444037456	2.20580879225624	0.684639014439106	1.51527112827408	3.76558879731197	4.44497801849923	2.59826754162104	3.53811077715554
Alox12b	0	0.0267018409874587	2.6515262181216	0	0	0	0.0263171144664697	0.186234623916343	0.280718073205398	5.5791016003188	0	0.363599166612106	0.0468879579753881
Alox12e	0.212259849741056	0	0.296308223797917	0.0936533687559009	0	0.0351890883843099	0.0601519493020653	0.00882341395273258	3.04022238353905	7.60142277353661	0.125786586514021	0.0348395530601604	1.88050263866427
Alox15	3.23168213309003	0.708250909160565	0.0596923233069272	0.717065832093106	0.658611651605336	0.126865817798432	1.54302559907518	0.137064680123648	2.58633592213481	1.82107685349461	1.84868111434377	1.07393892410468	0.187518853129795
Alox5	3.86960712244061	1.17599900406298	0.647640157510622	2.68691497886099	3.50371770576195	0.0494076608794838	3.55923102192455	0.915684221010556	0.132742824344189	4.30844829599457	1.97679518487069	1.36813099887112	1.75359426072923
Alox5ap	6.44036509641993	5.02152694062009	3.67515780175897	4.00607177605284	4.85677145099752	2.11035605908802	6.45419417512587	2.90422692364977	3.08092062120971	6.63514639615378	6.60873685148579	1.3320725665748	4.46045115860006
Alox8	1.16918665657589	1.79618583771734	3.20291595331258	1.70770544269818	1.0714044118432	0.967478107711379	1.91252365312549	0.80829172182598	1.76939231180845	2.21898265466353	2.17138559949526	2.11841949842556	2.01525021597502
Aloxe3	0.193737165810031	0.783848344514015	3.35239977248238	0.140298780714297	0.0549249182097041	0.058847741969898	1.06322179547244	0.0165526910616569	2.23182848280296	5.41340941426976	0.866347537619151	1.73923895245318	1.03660200706247
Alpi	0.0271648976704787	0.0296537665326342	0	4.32327692338198	0.0614571302206075	0	0	0.0110977594548435	0.227519387670898	0.319669225216786	0	1.7849188158447	0.0827471006566302
Alpk1	2.36803687954967	2.600064301755	2.5032092691023	3.57442775642534	1.66874984382343	0.689504333912909	2.55747632050276	0.784699111114693	2.07186124058252	2.61558920982656	2.97220140050624	2.05664901212911	2.3761654233541
Alpk2	0.0298115759012739	0.138365813036796	0.158689862504822	0.0231143718958933	4.45919904528517	0.0100058240578101	0.0783283459314413	4.03598223744812	0.756574342934004	2.02475916323521	0.949465785180072	0.444263113936574	1.36984000323705
Alpk3	0.395858602601727	0.125564535611494	0.296035810960633	0.0964077400993511	4.64987570567277	0.0515312072057945	0.688481523741542	5.69111589763578	0.482592332752652	3.57081501805081	0.282460775790819	0.248671524110051	2.82129140442791
Alpl	2.8544679058826	2.68954226792963	2.9491585147869	1.36707071092328	4.53511787334836	2.93839203717411	1.90882853363029	2.88616475036726	0.875336751200983	2.25686560893845	3.16136296401068	2.79951447194325	3.5821502884212
Alppl2	0.102695734871233	0.104209305374065	0	0.265467169272618	0.214185251223778	0	0.0434878707942857	0	0.486133577223281	0.645590676176895	0.0409492019130197	2.50375227880416	0.157466173660416
Als2	3.38212842846028	2.98719726464292	4.82451692772864	2.92927786973959	2.61960399241376	4.41642201875862	3.21919716902103	3.21196650817792	2.95932889084219	3.65411924972627	3.58762127898401	3.97864323190308	4.39339467258834
Als2cl	3.76305893776971	4.0866181638203	2.57077178883865	4.11733852326683	3.39493774981385	3.54991623943778	5.87534229799931	2.17645927579413	3.4946825157907	4.83873561800664	4.95307099941217	1.42594197272853	4.86574147301208
Als2cr11	0	0	0	0	0	0	0.028453153819873	0.0192663149536647	0.106293935619152	0	0.0218429460656385	8.22623452199742	0
Als2cr12	5.71828889899071	1.18788921621758	0.635317927326879	1.78584574610737	0.185428530760593	0.242842910029661	0.980848754946789	0.241374860473872	0.39457018324812	2.55338395740077	2.69993046725257	8.00513989225611	1.56928596589457
Alx1	1.13710230975146	0	0.131134940319141	0	0	0	0.162122337937131	0	0.0343989201413738	0.255208580808853	0	5.09065111993295	0.185050713269611
Alx3	0.0655997773152776	0	0.632372732722688	0	0	0	0	0	0.707423679685072	0.266568698869146	0	0.117954937809999	0
Alx4	1.62457860326359	0.914643274964039	1.13262542049771	0.240924577890409	0.2550250301047	0.607992622190584	0.31209021999722	0.712080104700159	0.156547554051774	1.45114896607794	1.03010130245178	1.21703899992373	0.90905881383903
Alyref	5.63510098352891	6.16551333002932	5.70100881096838	6.10388220614175	5.49018779423367	4.28006652735138	5.84396481190792	4.39689292591829	5.40157987050809	6.23069690994989	6.87765593996837	5.72317788754412	5.75131294271611
Alyref2	2.71817530555016	3.42808135484178	3.2552559574094	3.21574880067033	2.75076789238399	2.24949546529281	2.92612651665816	1.9729212499858	3.39686607665986	3.10353371922567	4.05966728099536	2.04441322206065	3.48740566548609
Amacr	3.70848649932285	4.20090650846279	3.46312049762587	3.3050289324741	4.72265834153827	6.34900763594924	2.98486424124063	3.95283051740603	3.33005352226819	4.23215688730759	2.44552176019167	1.99989894472916	4.28470300380043
Ambn	0	0	0	0	0	0	0.0120559774122562	0	0	0.0344832197582623	0	0.0653516515939112	0
Ambp	0.030062587951879	0.659113177479463	0	2.29112433669478	0.229872077148208	11.3357201816679	0	1.07952319545571	0	0.0621372350087583	0	1.26370836727813	0.0452055871236859
Ambra1	4.00728212191655	4.4637882759465	4.9156885234589	4.26277873470811	3.25024221344013	2.84760590623178	3.87333104494663	3.42915123937297	4.1386220799567	4.33206500782026	4.60933999074299	4.69236432152937	4.65082817823449
Amd1	5.44429543005972	6.73714450859224	7.56834363701372	6.58884515468651	7.44445251308984	4.67103747514763	6.04611619729128	9.13655312120925	5.95292408850274	6.57780547204395	6.36452619481576	5.80381916315697	6.81363346896367
Amd2	0.000107211428436036	0.170330991308342	0.0939773016337258	0.348843833626964	0.129626190874275	0.158669331822939	0	0.810591312727543	0.218746777664319	0.213822371667334	0.127888007540054	0.0496862915348805	0.365470390873734
Amdhd1	0.0521545229213349	0.0866092909030019	0.330620081035941	0.121532864421745	0.0479264193539299	7.37944984811609	0.170554745049408	0.137837989649545	1.39116180156946	0.44208731650261	0.276256475665497	0.144351101173128	4.58242900272301
Amdhd2	4.58358803043509	4.55559814273619	4.29312958604021	4.5640553345452	2.79352728670583	3.47142629183259	4.23265753881138	2.74111730677235	3.13934672594101	4.08222544276573	4.45933402160208	6.26460853754434	5.13740642763393
Amelx	0.0420113791383202	0	0	0	0	0	0	0	0.103655651302616	0	0	0.0398297243997305	0
Amer1	2.59954515938498	2.27761244649291	2.27745690515923	2.26164440598392	1.51451813378448	0.991730907528177	2.72570703217591	2.21730139669572	1.65888010026048	2.72652145744122	2.45846712494214	1.06826398254056	2.44930475399016
Amer2	0.0934641124759148	1.39566682487228	4.56699386074947	0.142149990824461	0.0460085556923984	0.170014767925705	0.239297536379735	0.0296642067097003	2.82212511121213	0.450752991088772	0.349884917837448	6.13264735250792	0.362448336563233
Amer3	0	0.814809228041797	4.17290387380422	0.225922792081939	0	0	0.00416008165202963	0	1.97132040713659	0	0.0625528517534985	0.448666056231321	0.245031624878052
Amfr	6.60864623449658	7.59078466254131	6.83561354799351	6.53689594071555	6.10375649629148	6.69847093715221	6.32890049241317	6.6099997090945	5.78815421345762	6.24005058276679	6.14317829846008	6.09384137477059	6.85667541149148
Amh	0.21073900046172	0.561942406122923	1.60126861573509	0.29820610942126	0.206020340495965	0.07071620745817	0.265475063200034	0.350134362421593	0.333595814729082	0.396328092271751	0.712377327384555	1.54203874890458	0.434139747628772
Amhr2	1.87298261642826	0.812781577564503	1.13479680216763	1.20753140524774	0.210649919605999	0.241470862714333	2.263363036075	2.14268026025904	0.258901277849846	1.47665868438607	0.408478910920389	7.14529062393375	0.970500255838347
Amigo1	2.66192722790137	4.16627237886948	5.56657729389624	3.55661827828291	3.01437722673915	1.76253112759672	3.02362612251332	4.23339478244939	3.76697791068948	3.6006808911352	1.86711143394477	0.630072115470577	4.75828510213823
Amigo2	3.432702960495	3.15945264349282	3.95525537582909	3.09210800952638	2.26331501271127	2.39009875409259	4.71533894566375	1.50291377445895	4.18545089713901	2.6090432627156	3.5701305057824	2.24307740945174	3.11825830104199
Amigo3	2.16205342824572	3.00048116231592	2.87697243979275	3.21543169384674	2.02137288190553	1.43368158341658	2.13680821784667	1.98022813939849	3.18851750065295	3.18632607284727	3.21397549917052	1.50830187403709	2.86564812085472
Ammecr1	2.3837162061646	3.21761713494561	2.16200269566765	3.49092227506331	3.02785729448388	0.78020663597526	2.03527135015544	2.1367044825706	3.86677427644722	4.06326466217242	3.80120501969772	2.34894850481296	2.11215557740508
Ammecr1l	4.75296849977748	4.79987007676086	4.65038053020436	5.18316238786957	3.69028724128686	4.54071552919713	4.68683596755361	2.77356256155646	3.94334405836056	4.77946239253395	4.67411536251921	6.40013211515397	4.65812939414877
Amn	0.0179324043073048	0.0955393702469104	2.88710372681909	1.537193845197	0.0392852874420875	0.0294115506240975	0.181915581385463	0	0.279479337761587	0.921065789627806	0.494687429784104	2.82638496773156	0.184099798975477
Amn1	4.84789469620492	4.97496858286411	5.52412729505094	4.68251821258944	4.36395055991085	3.28224495588594	5.29708416625242	3.19153738693937	4.59066448699031	4.17417541138853	4.02812390841151	7.85189874309381	4.5080557321687
Amot	1.5889749645566	1.98775266823245	3.88068660666565	3.76226443840815	2.20320081170629	1.53721003052519	1.9786167792551	5.18929914703161	3.67842108511207	3.56466447823192	1.1935872735371	2.06318815326521	3.08972192696075
Amotl1	5.71633065803755	3.96150790996704	3.75150890445307	3.4195905813134	3.59405049789242	1.45424613136415	4.53399165819401	6.97153133649763	3.76500802537549	6.05707010490455	2.65903315256832	4.63309105987152	4.72193005889684
Amotl2	7.48306147902744	6.54098438001603	3.67075932353995	3.77930032174712	4.37725468496643	3.46134364494692	6.47786784938552	3.16363152470594	2.59618774587505	6.0033999875879	3.4305501579181	1.69455819078637	4.29685540406276
Ampd1	0	0.0740425270659066	0.040811795349494	0	0.031847082815645	0.0503098530648088	0.783083641151169	10.7581374716978	0.0602508945438582	7.12467879243922	1.62808392208297	0.707118920805917	5.55296068739113
Ampd2	4.50890241873955	6.7685229415581	5.55497247387313	4.79468499463778	2.73739400955379	4.21611399315591	3.76914772794487	2.25630862745982	5.27864867877505	4.24146683105766	4.68563683350539	2.31848033807245	4.78963350937937
Ampd3	5.11313329142961	4.84808580348389	4.29945095913297	5.52481536174104	4.30716555811409	0.834919331724806	4.39814978632453	2.96818688466122	3.99209054747557	4.68824865483795	4.66543935453027	1.53058529789077	4.21462101130103
Amph	0.708461706922559	2.94802914028755	7.57309970790899	2.25505811039385	1.14651573145385	0.0556312824296049	3.79086762986641	0.396856358605766	5.12567670703855	0.585387192696522	0.979410394757697	2.60777284429169	3.30005128454867
Amt	3.24105520727011	4.3154970921226	5.50634637910261	4.66759511512452	3.58288231767168	5.4584217475448	4.26784843637869	2.58093365510337	4.86960132955554	3.69550080252787	3.39127760030283	2.97430841489858	5.73891435809235
Amtn	0	0	0	0	0.0613864845066721	0	0.6091779094828	0	0	0	0	0.106786109719921	0
Amy1	8.71673289053168	5.72216837066927	5.50164327015353	2.03552423658679	4.55383882535624	7.92904070337629	3.30507021415276	4.75375705527209	2.80768329881482	5.39654402721252	1.22434883359318	4.4683370157112	5.00093546567344
Amy2a2	0.0986253196418574	0.534371867206295	0.48959940415486	0.277038395989854	0.0791319972322297	0.0722777290653881	0.181964568994582	0.0645012538257997	0.256071554265137	0.212617753137336	0.260747829704799	1.34384960625729	0.195949979695836
Amy2a3	0.0986253196418574	0.534371867206295	0.48959940415486	0.277038395989854	0.0791319972322297	0.0722777290653881	0.181964568994582	0.0645012538257997	0.256071554265137	0.212617753137336	0.260747829704799	1.34384960625729	0.195949979695836
Amy2a4	0.0986253196418574	0.534371867206295	0.48959940415486	0.277038395989854	0.0791319972322297	0.0722777290653881	0.181964568994582	0.0645012538257997	0.256071554265137	0.212617753137336	0.260747829704799	1.34384960625729	0.195949979695836
Amy2a5	0	0	0.0246359133187932	0	0	0	0	0	0	0	0	2.28255699773359	0
Amy2b	0	0	0	0	0	0	0.0201015067438472	0	0	0	0	0.130946957959653	0
Amz1	1.91663822141798	1.46762985126755	3.2970251675407	1.4097542502632	0.681985303770952	0.498361829533534	3.38728385992629	0.211223086855505	0.68723073447144	2.62154158739407	4.15513297171826	0.248148870484206	1.73552136543932
Amz2	5.22317996361173	5.13623633506795	5.67903615080058	4.76569006542116	5.40476841661379	3.03127265773554	4.65251127886403	5.97003952594654	5.32683382945924	5.27720698776472	4.34720886162952	7.89668857181198	5.27221989680555
Anapc1	4.56223889125424	4.68689691685206	5.04148129568019	4.65665120323676	3.78874740333926	3.08554138980077	4.67525532010971	3.30328201318408	4.52836159802888	4.70805220143797	4.93743806536453	3.9496372903946	4.37202610917928
Anapc10	3.64805027187596	4.10061577203543	4.02128640811896	3.24544664360844	3.23669249391586	1.83641596659797	3.67267970075746	2.56176687782703	2.98143515942459	3.58031880527433	3.50983660326502	5.01557868296077	3.50844765024231
Anapc11	4.10541799738932	4.44806506725371	4.66917786244001	3.83850011152825	3.90064536653015	2.26298849079744	4.17768110591859	3.60104689924288	3.58240082403282	4.11959048650689	4.14146161129576	4.37431575571661	4.58548818286791
Anapc13	8.25704150444553	8.76374086117234	7.32851080267936	8.03684291410742	8.69892600658796	7.13970142927875	7.46643753914541	7.8364710869948	7.08675125223317	7.80017054210292	7.2975144653869	7.4595985080254	8.9002205924276
Anapc15	5.65698732183487	4.95555183335705	5.38443019949914	4.95270404402901	4.53415937243379	4.3323763828431	4.39719885894857	4.36874765455659	3.93416936451578	5.04216433968658	5.88544664737874	6.0405627556205	4.86321305373149
Anapc16	5.89226290740419	6.18200017363969	6.2454361512364	5.61374575709638	6.00522442599514	4.3153817624985	5.77017076450601	5.46620239421733	5.69491565649376	5.76533544304035	5.95340206872471	4.72025284945353	5.99444448985008
Anapc2	6.12629326172888	6.19561365067299	6.00225326983901	5.92067484691274	4.65067150842401	4.23839749415728	5.84760928368467	4.63447425611822	5.67138098089859	6.1418964547617	5.80678908749129	4.64070034012395	6.07277880713517
Anapc4	5.77461168762055	6.3273645173005	6.21197415530337	5.34611066536774	5.3323863848465	3.6655319213834	5.88554507091329	5.09387478441472	6.13074387741339	5.52796233056933	5.61949353347354	4.92070241295596	5.84964865096917
Anapc5	7.45167686438926	7.65805753731415	7.8028477946514	7.05516408513683	7.31303868832811	5.32955585495928	7.4792307548266	9.16546828305519	7.41068293672795	7.9779098909018	7.43993782000378	6.04364557403855	8.03525672191688
Anapc7	4.54179691831448	5.21515759514129	4.95012446820502	4.66939435028068	4.6602312098811	3.37483931737067	4.23910539551475	3.50096268549884	4.07178762980037	4.62987684272716	4.8451281347902	3.91611773093324	4.8781785959542
Ang	5.28904331509255	3.8002977875486	3.04355169061088	6.57010457981226	4.10369294743924	9.07472845071427	6.70401028329844	2.8532445686478	2.19135476839132	6.60312753194985	2.35749455777504	0.737781542926179	4.67607040702996
Ang2	0	0	0.142376341729547	0.345595562775605	0	0	0	0	0	1.23307884516978	0.318417742208671	0	0
Ang3	0	0	0	0.51323070467786	0	0	0	0	0	0	0	0	0
Ang4	0.0813819897743393	0	0	9.2191453567161	0	0	0	0	0.0332126198578867	0	0	1.26760062008657	0
Ang5	0	0	0	0	0	0	0	0	0	0	0	0	0
Ang6	0	0	0	0	0	0	0	0	0	0	0	0.0619654091597226	0
Angel1	2.63956122579929	1.93854829325319	2.66822038497101	2.45022964212193	1.71818231766293	1.32546869878091	1.95531460717389	2.49853336775106	1.95287607609884	3.42824936175951	2.42741997077793	7.0822536783563	2.73037508503042
Angel2	5.26686810546869	5.48540617633026	5.84949003578657	5.68854511645994	4.67917656528177	3.64204556152619	5.37827647367859	4.68197275746944	5.14792078177657	5.46190849337276	5.99711939316706	5.07647470687742	5.43357226942122
Angpt1	3.95542002729451	2.63352981835391	3.16968378659033	1.87700277782794	4.53876252244992	0.428404221640462	5.86435974558766	2.92771313251543	5.62006374600812	2.73405523777372	3.01335186391722	0.385970992214911	1.98922218596301
Angpt2	3.07243129880907	2.42761685112666	1.37731904890837	1.68892163555362	2.22069334620521	0.598093097425111	4.07318635419249	1.13171408652109	2.22403227971806	2.44104833044638	3.30429641547131	1.62102000278572	2.47725608133376
Angpt4	0.728803150601905	1.21866773257825	0.145843675644859	0.511922793022917	0.208163683268522	0.0641462187261891	0.948417491468445	0.741287583749799	0.0878685197862835	1.78076551680977	0.402890025680702	0.422520074030861	0.414641824791518
Angptl1	2.76911942666134	2.59678154530289	1.2667171457002	2.96793783878549	2.39120872796828	0.103912757997702	0.128947684220056	4.27791305407999	0.729848260288548	5.32827566846984	0.41699609215424	0.956787329666189	3.25857184247678
Angptl2	7.40848049042512	4.56480975294078	2.02114184140102	5.63950052991216	5.66000997401277	2.94997155552203	5.3971906915809	5.75054204571245	3.29518435320294	6.49402903372632	4.76913839815379	1.18994248924543	6.24257770395297
Angptl3	2.67662345387107	0.48081405319431	0.479049271804779	0	2.68676436865956	9.8056911372828	0.392240575007747	0.343221500398372	0.254421111847854	0.222799090566625	1.01152307499335	0.336495043086163	0.53072409018223
Angptl4	8.18724395100571	6.1598570600386	2.03734055387493	2.4041251494157	3.88807983649288	6.64167717656303	5.75356460955139	2.65715496207034	2.65859375690955	5.45746332492159	3.97226235924375	1.90394511985601	4.83204297117185
Angptl6	2.07317764503214	2.12896172363712	3.37177340321649	2.10451851285321	1.95138291168442	3.85880505324543	1.17080225709425	2.78389837751771	3.15257666736834	2.07598143791164	1.32188639700148	0.557027260522965	1.88925625581194
Angptl7	0.804419569072655	1.21327580662941	1.91527379737073	4.72177288846037	1.90411782499136	0.721621256696441	2.51876369437686	4.65504952655421	1.34812844228626	5.13803483944961	2.34277117538046	1.44673466037697	2.03445193048997
Angptl8	6.15243129581346	1.92325144611773	0.843607815822289	1.95013290681776	0.359440938605974	7.29544563675623	2.40592729451893	0.757854593234991	1.23717654140297	1.45171226530757	0.384342376415578	1.27969129118638	2.1694214329386
Ank	5.02525199384474	5.19626847948706	7.30130093633454	5.67148375741144	6.8213808110968	3.85581799753259	3.70140024237563	6.68061922389364	4.75384447992362	6.94609263242014	4.33317968617991	2.91805166012525	6.51076939539538
Ank1	0.779504231692449	1.89157158293312	4.5885890738827	3.16806180591286	7.46037244166375	0.0732461294183297	1.0873450902908	8.64236841200242	2.96205246471988	5.18839781417548	4.40700637910271	0.716372615822531	4.70558790690697
Ank2	3.36732860097408	3.78836456577311	8.01026056350006	3.03339522306908	5.19179894202653	0.853641057038442	1.40589551503781	3.49360856970959	4.51091767836634	3.24123391430313	1.89714299057284	5.68540192128594	2.27455430660213
Ank3	0.756044628259987	2.86105134381197	6.55256316831808	4.80064139383376	3.85807937055602	1.85206322972686	4.23016534828659	4.64198649110716	3.40946996540322	4.60714146150415	1.46908205926609	2.21326093384501	3.8818232824043
Ankar	0.0059453448104116	0.0727775570441086	0.0753946066859029	0.0126669115598884	0	0	0.0360507298552974	0.0580833440307056	0.0386148887687492	0	0.0347608390579102	6.01435789114797	0.0485166665629993
Ankdd1b	1.35348431252624	2.04310660826943	3.24443781311259	1.53656513997778	1.25914901795768	0.441786944256872	1.88861311674041	1.15851775932544	2.23664263640423	1.8017247744962	1.58990931969283	1.84714286743381	1.91703831493693
Ankef1	3.82971066072648	0.864233194668477	1.11440932737513	0.122348566854735	0	0	0.840996640055697	0.103037040490882	1.52601308318526	0.598807167322319	0.034390497541873	8.91268813960098	1.05280353545583
Ankfn1	0.0372385008952585	0.0954744538781752	1.57733797046763	0.0202801724664588	0	0	1.2227515401749	0	0.101430210725508	0.483260906933966	0	1.98491563661822	0.41425155275288
Ankfy1	4.43018181499671	4.82185632899771	4.76407624326562	5.20315316673714	3.34314650127306	3.00013605327749	4.71835616698011	2.50750644060036	4.17067984757684	4.85439382135684	5.29643332880123	3.05983357562553	4.64019573818367
Ankhd1	3.79813402295982	4.34332735706327	5.02583196831552	4.5751750776557	3.68995610844804	3.11189108391464	4.43372361450096	2.9939399852343	3.82227744522444	4.84307246990956	5.27313987056894	4.62371414219876	4.59874057557478
Ankib1	4.08040317411466	4.3888635127528	5.07845272232531	4.65271333845877	2.97902678147704	2.9615912251488	3.93376082254546	2.74756011109012	3.43625771762721	4.02230997589305	4.44836995205311	4.26427827404224	4.4486371219984
Ankk1	0.0156478096689667	0.157522348308399	0.237428666409893	0	0.0460486591793583	0	0.34562190594474	0	0.406975186032425	0.0289488445488469	0	0.5707904118494	0.052617115312508
Ankle1	1.11855598762082	1.31010592775043	1.08898727712475	3.29704666527948	0.597912838227922	0.341851355472792	1.16318101543927	0.172886442842872	0.917127871173228	1.73211235973332	3.58153567873111	1.39965665263012	0.73705791086494
Ankle2	4.36024569768453	4.67767627359507	4.75401434317773	4.07995061500198	3.93717157231874	3.28617381959249	4.27602728763782	3.81917475916574	4.2780938766115	4.57263266698792	5.3289814058791	4.86720686860662	4.38010731149293
Ankmy1	0.118567329233569	0.508113410111615	0.269033764254212	0.102408616007893	0.0151204685866804	0.0184279743570078	0.92358120893334	0.0110916841845468	0.451769427695913	0.116081360295597	0.343034437890263	5.22186614694399	0.411505093387872
Ankmy2	4.79366539599772	5.29859202672368	5.85998106397682	5.00285282820071	3.99701472968009	2.68550481332988	4.45560594884188	2.77878583581953	4.45622963557958	4.56460773583618	4.59650917556508	1.85297224517671	5.63266054206856
Ankra2	4.59101495646786	5.21925408036223	5.82056741555573	5.17798594736641	4.59703974217534	3.51572520761367	4.74141970120804	4.28550021484593	5.4424421845706	5.22345947261071	5.16677095521642	5.06924408564637	5.15393634674062
Ankrd1	0.345191251166465	0.0300371952316484	0.241911943734729	1.43079854943882	10.2416940888623	0.583116407930941	5.06008102332822	3.55146065250363	0.0700931134713665	0.573871772522643	0.296436301378122	0.208550928075912	2.09889915119486
Ankrd10	4.68240837320326	5.80796698165607	5.75948990110593	5.5567997800792	5.09840147032387	2.63278806272895	5.04649778008842	4.10882772716426	5.21771990674032	5.29921627939478	6.08694049386853	4.98551895524952	5.38418110479224
Ankrd11	4.16366777228386	4.2944420420273	4.98524014465188	4.82324505627857	3.14993001501937	2.52924552297746	4.2586142331227	3.4458936518348	3.8927308042688	5.02012986748915	4.89652465970254	3.39605968160707	4.07354921156289
Ankrd12	3.18087912717846	3.22098868104877	5.17823948117026	3.33841485095155	2.6611974080771	0.92237247835744	3.76465987051592	1.96956267738318	3.29498652092451	3.94389936790348	4.32190676513587	3.62720533160001	3.59362640961693
Ankrd13a	5.76890328192836	5.85410931060139	5.20765090666499	7.11848243069521	4.49922922739971	3.63562629962807	6.69770981457824	3.73947257742142	5.14201962064001	5.88893246400347	7.04845839953724	7.57047358537684	6.6429458313574
Ankrd13b	2.77684292031866	3.37047212681834	5.93710128579652	3.34072908939572	3.75939339552681	1.29799392310846	2.84794469434753	3.59781400787393	3.05975577391003	3.83476434331924	2.19536940835406	1.08966876238261	3.99471483495744
Ankrd13c	5.22741057801233	5.55591819159787	6.07766061219365	5.2858410594966	4.08006479676656	3.77133365582407	4.85524340782327	4.02292584955276	4.34631862305117	5.16254530962722	5.20317466646595	4.77262789136184	5.26228043315657
Ankrd13d	1.9812232045356	2.7533580025612	5.91481463473161	1.7494246781965	0.861044958975885	0.369597758034897	2.33654933123654	0.496445138215548	3.73426625562622	3.37732556577723	3.55239780816921	2.11011510458829	3.04353598331087
Ankrd16	2.35409791493126	2.00255073290773	2.08650382136201	2.25526107567182	1.60919357681346	0.86993631533202	1.78264737972359	2.69016764150743	1.44204884193901	2.22884799214533	2.35871680122992	0.789662080536157	2.02075446228877
Ankrd17	4.6013150280172	4.98521885843623	5.67736442015639	5.00133277214948	4.34340649437291	3.23643042431681	4.26910800880811	3.61433296940418	4.50612437769792	4.69741190986933	4.9885985294138	4.07602398677574	4.48416854026671
Ankrd2	0.0804856532721961	0.804859154422397	0.705006748362945	0.112578164146613	0.452307551706949	0.478150508167425	0.289087537668714	2.61447629141493	1.02228688369143	2.44813785904188	4.04379494684423	1.21425775792218	2.57983204279498
Ankrd22	0	0	0.82464902597811	2.36714088527826	0	0	0.345588805960454	0	0.811083165790568	4.71480279923117	0.585170045798763	2.08683755229463	0.082434365493858
Ankrd23	2.49771866538773	3.81060390895479	2.91368557665461	2.94637804220337	8.36587822741325	1.49589127938679	3.22109851347617	11.2335630492389	2.91257523407219	6.56902786909592	3.83166855812702	2.987163548035	7.50458303788344
Ankrd24	2.42832697593755	4.71956674250161	4.94220922476408	3.13526699145183	2.35332998325485	1.57629622174575	2.60055909209121	2.3864075678075	6.1354964388169	2.99147943719387	2.1040258160791	2.09474745941843	4.89653464790608
Ankrd26	1.51762408291466	2.09047848084737	3.69043404072386	1.8910230105855	1.33549797388308	1.151651571052	2.26154195929603	1.2794812601463	2.50559128419917	2.20672419965299	3.14595461760193	1.41433827141334	2.02756251304501
Ankrd27	4.8274441431948	4.25119442688073	4.90056812992712	4.4130149004042	3.14482584446612	3.1651246802511	4.30494251641336	3.03512069989444	4.22709444125494	5.24304828164831	4.42356879666556	3.87509901337347	4.5228260000313
Ankrd28	3.13096524787254	3.52040503921577	5.34922694660794	4.29323846706144	3.82122728836559	3.33143897931147	3.35315464774299	4.87404987366349	3.50125222431559	4.26666782353563	4.15391166419157	5.0151877293061	4.2580567222551
Ankrd29	3.65224540368461	3.074919434674	4.82588845969207	1.22851490884671	2.26413671169199	0.400015201445826	3.74685148193433	0.883539738194643	1.53543977204265	3.6948588368669	1.46660787806349	0.393846323685652	1.91305679813861
Ankrd33	0.0810872499486688	0.130707879461555	0	0.0449290274199336	0	0	0.221871001055111	0	0.0131318844139901	0	0	0	0
Ankrd33b	0.790881288021073	1.32130138356077	5.29750756188552	0.468721456263104	3.73866917524317	3.34230872084559	5.07666697271984	3.8104768982315	0.759056325666429	2.39254608548649	2.04703003861318	0.979396005996589	3.38493837641762
Ankrd34a	0.26005603417605	0.928862368776463	5.5375970340014	0.799789523048028	0.833563973615035	0.0234044232373285	0.151757964106002	0.845822331011295	1.74767955966883	0.30359825890855	0.0903892259529907	0.111406278039748	0.766140706200344
Ankrd34b	0.126601379465743	1.5090595801108	4.45727271407777	0.342891999723017	0.0779113994787613	0.0313222318734125	0.231249276418207	0.017189412273789	0.906300906527695	0.0643396733382105	0.0658759343870997	0.203372070577203	0.0285617939363291
Ankrd34c	0	0	2.93616616107321	0.0125844912679199	0	0	0	0	0.0968386283697977	0	0	0.0154235183028308	0.250836305414363
Ankrd35	1.63796943991382	2.48362010331598	3.05979046464217	1.32360639778713	1.1639349145161	0.0265695510870169	0.889643703434295	0.693076012101637	2.71309932430395	6.11060495046148	1.14359759239032	0.594283360656988	1.10529362983777
Ankrd36	0	0	0	0	0	0	0	0	0	0.00737213005481971	0.0468318980646876	7.57573371109302	0
Ankrd37	1.33155616717078	1.42499743674312	3.89072951106492	4.66240007596176	4.29005174199845	1.3216456204777	3.43984488997732	2.75339979757803	4.45859165308124	3.37529034676937	4.08920030523756	4.09854551108229	2.73050756180481
Ankrd39	2.38786202383106	2.38987343606017	2.39453857414231	1.59486127509427	2.05391623296912	0.839969017402605	1.57992374805478	1.79356742080187	1.58939123793473	1.86830580354961	2.36717909531265	1.84220441469627	2.93366484879215
Ankrd40	6.83288213293612	6.3916268680649	6.64684393949292	5.66831074083914	6.86929502528563	4.27403293513136	6.47430551049609	7.18547874432314	4.96371122149469	5.90873179377178	5.29681027304241	5.41438422138476	6.08770504349773
Ankrd42	2.18931157768448	2.59144030900524	4.04013247825327	1.21596504754387	0.469865661490662	0.510678094475279	3.05722864536959	0.225094585369298	2.47387120170982	1.35498399572134	0.69256971180913	7.99975095608466	2.94008974395334
Ankrd44	3.93604240426663	2.81741190094515	2.98090270599167	2.88211195302298	2.32815382390748	1.16758254951478	5.29137884681536	2.12167430622688	3.20352455351143	3.90133993184982	5.80302862990525	2.30799508447694	3.59288401026728
Ankrd45	0.0241506332893551	2.89164007516215	5.92306593884731	0.405106523569178	1.02748254606115	0.0520180389889501	2.54417059922025	0.0184331458311915	3.53164096790437	0.0605851735556417	0	5.56559135833127	1.66902683747379
Ankrd46	6.25347648824636	6.24264418501151	8.01659988068448	5.27303476628872	5.20288304665415	5.2479549395218	6.39200568228281	4.76774826011006	5.51266542903287	5.61882914556877	5.13987954588162	3.81190518249378	7.2175919389899
Ankrd49	4.24365523011281	4.50889537100613	4.38971340326228	4.57998076574057	3.93995563614927	3.01787455752021	4.00947261735035	3.49091597561245	3.81889121743892	4.71740617580121	4.91802409174214	6.36996852911097	4.30317532446098
Ankrd50	3.34861550146836	3.24530206096552	4.33901450673673	4.11430617631467	3.44731138919567	1.49565338217787	4.57611424257132	1.54685759594728	3.18420687568929	4.63360310030149	3.72302063749251	1.94160558778307	3.87224703515799
Ankrd52	4.23117846769383	4.73678359807799	4.80161025966351	4.40414736826595	2.76490442647313	2.54351314479624	3.53135045634337	4.58353663121271	4.01160431746326	4.56447171360899	4.72188188624229	2.52032160334962	4.60711666510774
Ankrd53	0.210204563025878	0.594143814344329	2.008108613586	0.595745026295484	0.069898909797806	0.0435610234573638	0.409319322361379	0.175808480593951	0.693424239281087	0.603684908374777	0.689204595691592	6.27556800354326	0.363970235740885
Ankrd54	3.96453577326042	4.91927134189124	4.28708625366585	4.29638237286572	3.06437758893044	2.90545223450601	4.55922008914172	2.45037023352202	4.25414485933671	4.47774731029901	4.97919922895156	7.67303058472287	4.8119234446195
Ankrd55	0.396256773927383	2.02440004986074	2.50390466420885	0.216707219098742	0.339371291228282	0.186364994655542	0.343680427080661	0.10285200004738	1.15996917014982	1.29021080934683	1.52912012154607	3.9610878386103	0.513886614779513
Ankrd6	1.03362865049831	2.58495522250341	4.87314140507449	1.69868930784601	1.29582594562155	0.193031493171513	1.43295198473732	0.901365352030005	2.6418737727015	2.45177609098328	1.03045646182391	1.38288894080063	3.18980857846141
Ankrd60	0	0	0	0	0	0	0	0	0.272554899178986	0	0	8.31586349514539	0
Ankrd61	0.466969489847644	0.669777715964778	1.43279448142082	0.687885590572601	0.301912445302433	0.303288179036032	0.894796312496225	0.222839544956336	0.670698964343359	0.915916368435007	1.50252315856027	8.02385389607523	0.98912719688992
Ankrd63	0.00665118290633662	0.265301246110486	3.82300205558518	0.36487082044439	0.402734659661647	0	3.08251099728818	0	0	0.0556793449827435	0.037447925393077	1.46583642007994	0
Ankrd66	0.499788342999453	0.23547829462141	0.874164916206753	0.277625760536009	0.156971437667272	0	3.31794402827963	0	0.105192284116465	0.702420704855141	0.433332604483151	0.484198381296287	1.71855660206145
Ankrd7	0.0466782247705437	0.18912269630341	0.341616606553285	0.0852873086981491	0.225869790445425	0	0.321467963738098	0	0.0188080151503718	0.153123470448869	0.280541433966489	8.51299853884128	0.0494027479612836
Ankrd9	2.56880143683644	3.72647903602586	3.82772249973789	4.35043959122657	5.18585714049225	1.35158717740966	2.15542977040893	6.77635881310234	1.19837035164089	3.97864161986019	2.84828492971059	5.98229453004617	4.06445122688389
Anks1	4.74019694880199	3.70601830685961	3.99799442017862	4.07858180514342	4.16703519629434	2.20894563582243	4.8961545123388	2.20709506476937	3.42486331755952	4.38451792049888	3.6794815556222	3.00014976220459	4.11807242162979
Anks1b	0.0418372821684869	0.527533278079794	7.43722351562432	0.538021614140899	0.371335043313341	0.00567898227551543	0.0992476190840357	0.0463467631957475	3.15330306297599	0.121155967054315	0.191521070365255	1.89099250761053	0.276299369329806
Anks3	4.48798212723603	5.50190157598984	5.68764484836005	4.69975009473248	3.96086513795115	3.3363202003664	5.09208247662836	3.51730075022603	5.18902163015405	5.14787598346437	5.48678003936165	4.31730434803564	5.36820499971469
Anks4b	0.0449981447015202	0.0450356290559112	0.476253085565528	6.76079062063911	0	5.72196426081529	0.0362074922904686	0	0	0.230443399224498	0.0227323194436768	1.759999827644	0
Anks6	1.95903104900447	1.56397321226544	1.98985822817203	2.3708714549946	0.902158460933444	0.147598390876187	1.22884995233378	0.632879988076885	2.09784999124487	1.57825314769435	0.637153718912016	0.50532388052477	2.81342112884317
Ankub1	1.33502560808234	1.38841625874944	3.11934418913495	1.35471688267459	1.21966424896863	1.44968413765747	1.89983959969508	0.837720746627978	1.83849538591478	1.36126551795485	2.17448921540205	2.30382285365629	1.6173397298383
Ankzf1	4.17056297423266	4.40044255700335	4.65696798119323	4.86311959615693	3.71477941552244	3.49212950487884	4.23969377748796	3.07560526537162	4.63821037493166	4.739293065802	4.78900496226363	3.58198755357437	4.96441128088145
Anln	3.20181995703443	1.85354610605422	4.61626470148054	3.60412337454218	1.04810304748256	0.366933576468728	2.20838531030426	1.22109159698062	0.95102515268475	3.67004910542139	3.66072250600271	4.12642771428216	1.41923516132692
Ano1	4.23087332574676	4.36707981318986	1.51484438967427	6.05880283984585	2.65989937604564	0.896690511899321	5.68101751423523	1.60441357197404	2.43917760696344	4.72853374044263	2.71873800094121	3.84380721042171	4.09054454288145
Ano10	6.55218886563106	5.99005914206112	4.53944750822299	6.41291337482079	5.12041618568475	2.81895626590447	4.99051387634677	4.95991628489527	4.6562632712497	5.56970521812968	4.16543525626211	5.33088883285242	5.68208303789653
Ano2	0.0324782412491307	0.147174032543118	1.63272323362437	1.31815611958998	0.0354165711924777	0.0178594950896303	0.214936729634458	0.0273642052249278	0.364648985797059	0.119874893008404	0.0100248074049493	2.19480705668091	0.265033117396884
Ano3	0.665535510839842	0.894914662088662	6.39879924214513	1.09119547327539	0.758204603820696	1.56700799012639	0.800771464181358	0.698858885775373	1.2677426554809	1.15935761588925	1.0005576085199	1.37511478078585	0.892325052269656
Ano4	8.37688423737449E-08	0.473232266031958	4.0257196666994	1.61038456272046	1.85277001135794	1.87203148899404E-07	0.045731381433354	0.217641080691957	1.64590921900877	0.140650483001765	0	0.712103276454663	0.204109455790192
Ano5	0.0826043267884102	0.236860608287096	1.14544514824403	0.378061128300915	0.418157706235799	0.021684072224331	0.693655558072244	6.41825686510852	1.0367197771781	3.62467091599847	0.43097152428551	1.84253085004073	5.34905456827603
Ano6	5.61382387603995	5.66842623307883	4.05207741611417	4.61595236584592	3.85350225887304	2.07077987262385	6.0303156655644	4.48414979563843	4.75961119564356	5.83425523545503	5.38926017670501	2.58989439029962	5.55697293946873
Ano7	0.0958256772803994	0.121664045339735	0.345122349118869	6.16250289529425	0.0266744568059867	0.0146919292512706	0.210225232713895	0.0291970172145113	3.42327621609157	3.40546982224895	0.492031263644014	0.273364680165668	0.668192036228738
Ano8	4.82578768536335	3.97045038335155	5.29106402272328	3.42654127590535	3.16709689722933	1.40830154422916	3.70534777871701	3.72766042325136	4.29821182806161	5.31396462464606	3.39660099343085	0.787577928524937	3.7241667496445
Ano9	0.283730943357316	0.083740767405417	0.0418545154221355	6.39824740487026	0.168209688398451	0.119685913148235	1.7743335354151	0	2.65795187964518	8.02140717590074	0.206330730978221	1.29719971175372	4.14608213348055
Anp32a	6.89324262534373	7.68080401544816	7.86368045917528	6.80766664554577	7.22572483709317	6.45863256565767	7.6926658751176	5.19546035191727	6.28365399735843	6.77491115038689	7.57142057026543	3.56471640840475	7.51019578185103
Anp32b	7.1481807623379	7.45159436148645	6.29549731076544	7.18043845015945	6.38898132275371	5.26099023098275	6.83041415932892	6.61382023339798	6.51402885512408	7.35406579857731	8.3002193014015	6.44365113084246	7.44583750644467
Anp32e	5.52949157424906	6.3721065899275	6.69485944871347	5.83058939924321	5.72691071057736	3.64106032419243	5.98594191650142	6.18759749630393	5.75151557453931	5.82237607126113	6.65450391343205	3.69386552600309	6.52587580529642
Anpep	5.19313882263972	3.5832418867663	1.85433168587983	3.3821660859281	2.93889981646719	5.74132924601446	5.48943611975998	2.628519129763	1.94095523032233	6.11134160569574	4.40380601551364	0.756653888155521	6.82435282962677
Antxr1	4.92095167063794	3.83103480155185	3.3675134427698	4.62900941587244	3.07564309480141	0.645583905173249	5.69752602992913	3.10801559558637	3.65482686499664	6.63772338220978	3.76067501678139	1.67544095785453	6.80633860953374
Antxr2	5.93735504765186	5.49436721797317	1.29857008607762	5.36347493286416	6.17220695766986	3.9225918842281	5.73266862315568	3.89335944669857	2.94268097794959	5.4809380157525	3.89492689023065	3.91933533014983	4.47640535721928
Antxrl	0.0153994239610031	0	0	1.53957690288468	0	0	0	0	0	0.44112518139457	0	7.36725775030665	0
Anxa1	9.78839193354611	5.00439608692374	2.7755869637721	8.44623219455814	6.2769931391356	2.73373623359695	8.98467026377901	5.35909555205878	2.69103580301254	10.6220876940122	6.71015100166839	2.35212718385902	8.25507812890942
Anxa10	0	0	0	0	0	0	0	0	0.0575314696744736	0	0	0	0
Anxa11	6.00828682375768	5.7027565326432	5.53366752320921	8.01931477308965	5.60489025679569	4.36056951570933	6.69042358244125	6.87657471324747	4.04467407544058	6.43444418412525	6.09500702880436	5.71802658751763	7.51052741861051
Anxa13	0	0.0487686491049458	0.422133796804946	4.6891757738152	1.56157370159603	1.39985191461192	0.467123992443817	0.131162452114979	0.251743939934308	0.166340206790863	0	1.3552285806778	0.0247657388286845
Anxa2	10.9016730413688	9.705533186969	4.58966991027434	9.60601316820089	7.38121351305795	4.09615426237917	9.88277039987664	6.03301409075898	6.54639954793402	10.9199097729943	7.26622706246945	6.36022669678238	9.08029676924435
Anxa3	7.10892177346748	5.2258398938744	4.4498363196106	7.3162648853068	6.12531010772407	2.85297519998277	8.84491417365974	4.59906821121091	3.68569938326256	6.46798280165263	5.44060126270165	4.1423689328464	7.6297617393045
Anxa4	6.52732528127854	6.76876745883056	3.12557468946021	8.50392826310997	5.03709379022456	5.40993182215985	7.9209575948429	3.83081959526049	5.41436864040305	7.31447809110442	5.19546802623463	3.73110895545181	7.84864830591445
Anxa5	9.34870357605746	9.40621800824988	6.27867387340004	7.07418759228377	7.73576930294542	6.06652575254824	9.36950756804117	5.60151801865015	8.32073743468855	8.48089224218277	7.04416694818412	3.74017693247384	9.11512196511012
Anxa6	8.79690759394726	6.61994903634455	6.64676705248289	6.02747326896119	7.11815291042857	6.1671270286175	7.59325954313234	7.43347488185875	7.07478148563576	7.07211425570151	7.65953668964268	2.6717226061109	8.56886629066941
Anxa7	6.92090849003589	7.03014524326938	6.49631139108145	6.88188340402956	6.06307749057351	5.48853165918011	6.6782268249723	5.41902429379849	5.79895878607927	7.45059562759682	6.08707424556591	3.85970857102582	7.34172246457785
Anxa8	3.42360749549225	0.668921675335976	1.00954390507543	5.10371028591845	0.982754686432739	0.185487650633899	4.89764555749231	1.33228030962953	0.187328100026564	10.6952099485934	0.592616613269795	0.112179047844195	1.70218007471459
Anxa9	3.20576795061761	2.48033535183283	1.84039597360931	1.9612522388283	1.41726540413999	0.879730182366876	3.24851988320931	0.535612586883895	1.97732688695698	6.74407536595885	3.00557116940585	2.91008335020508	5.29011099862582
Aoah	2.93984729663458	2.55709429897016	1.43435485240483	1.66383825445241	1.9387201077297	1.36183626310515	1.63888410607524	0.756144879952342	1.35283029055742	3.02294722982809	2.61635395633115	1.77762961313005	1.211337677044
Aoc1	0.0813778816667224	0.0231170108208941	0.0659004265358477	6.58260521380511	0.00942686185285481	0.0632413727020396	1.92984090122004	0.00781455739983029	0.0661966730896487	0.0238305928800019	0.987889341517396	0.776751786678546	0.441961726455851
Aoc2	2.11865151113513	2.67187615860559	3.12188021850481	2.53881077568569	1.73193824486112	0.935017633971577	2.37498052569164	0.96960777501627	1.97927553889368	2.85660978607258	3.67002538680411	2.89860497942197	2.21276924798755
Aoc3	9.80959856300916	3.17005447150165	0.449144972250373	4.58457993814028	2.40524810967417	0.0428254082089046	1.59129122801654	2.3399828023862	0.560605205500011	4.41507445864199	1.05017740192793	1.65462384353311	4.44863574657704
Aox1	5.77066741293273	5.37402983827429	2.59084676629791	1.78462673589954	4.16640598888157	5.00837113269217	4.83774020891842	3.65575675120013	2.82265660171768	4.04854958846859	1.16208891252926	2.45675650593575	4.90164247007912
Aox2	0.024330840740214	0.244091613275101	0.0101680072711785	0.163168284967391	0.0371901480272755	0.0129380217975824	0.0214568376434414	0.294247949672938	0.419422745409105	0.179238900562297	0.0884278227179136	1.30648960349812	0.0963164492755134
Aox3	1.44027313916907	2.45159509544792	1.43856289586176	0.264230427195601	0.325864677632579	7.03944519142949	6.46816008618536	0.294704009475103	1.6661679162914	2.47677176618327	0.586963356965868	4.35368007011763	1.11259854639694
Aox4	0	0.058843810908576	1.10292269862987	0.0274660915965708	0	0	0.0184133470600281	0.0498351774304699	0.0668363400433825	1.4207843878701	0.213638275045309	1.36855737127017	0.0227940569275855
Ap1ar	4.81053221848229	5.57148532017092	6.70113325878781	6.43148044886343	4.45301816282091	4.04112560106455	5.17610859406833	5.08895379611191	6.0657151706688	5.63099234463572	5.28665336831493	4.05902843406882	5.32046124177523
Ap1b1	5.58068348794668	5.57712040289069	6.64710349698192	5.90770803685486	4.70445827959957	4.28269094036172	4.84718892181225	4.53568323795455	5.24660512563207	6.26102146017146	6.01083336166713	4.41028520619169	5.57709691190289
Ap1g1	4.9258821659841	5.37961817916038	5.85487581050822	5.62358348435256	4.27010523543259	4.56219157185998	5.32527806288599	4.10543668354217	5.19716698265653	5.11144891532542	5.27656242520932	4.06129119639284	5.38230069174317
Ap1g2	4.25365317098355	4.05207280183624	3.19657768329069	5.220902854068	2.41170556092565	2.45120078543456	3.97967596630315	2.10275268964004	2.54477836588256	5.0133005502137	5.89834723952107	1.61319432365094	4.34729387653843
Ap1m1	5.65535243520236	5.98937244126224	6.41788894413326	5.0123558504249	5.56608541136656	4.37545868020552	5.78698530132088	4.56267570409393	5.47621844644824	5.56338616666073	6.82977026179411	7.89317444118263	5.78390880900232
Ap1m2	0.115118936400669	0.063856032791375	1.61131142443423	6.98303026983885	0.0555842134814503	0.223885008585809	5.06469517013872	0	5.39489028695016	5.79639545642078	2.2980175031541	1.47547628149112	6.54956479553965
Ap1s1	6.73800407857738	6.59808358618505	8.54054260011758	7.11821091581602	5.14252631284441	4.60256646648182	5.91291543651039	4.40898733469718	5.86896670749539	6.26002172754202	5.5856091694481	4.44512153287549	6.35657531249461
Ap1s2	4.86723193370299	5.45277138138931	6.08936960567319	4.20216389092635	5.43716693728155	1.86526371530914	5.55939242259005	5.80212710992108	6.18449936658395	5.63541796272204	5.40036161665554	3.76832191769969	5.13001472189845
Ap1s3	2.1413961318496	2.33923235555176	3.98924036728523	4.77680434180334	1.64141051392348	1.44124850514447	3.97664187518469	1.24353297797004	3.56877751412617	4.42229475941498	6.0054843429818	3.39520067903746	3.99994355694112
Ap2a1	5.12358640547174	5.63201560559889	7.05932198533641	5.20251187465402	4.19190956728025	3.58002718596596	4.83179677821529	5.05785021555675	5.33904171088072	5.00885925438713	5.13249085275841	7.36998577611506	5.52149168610597
Ap2a2	6.24042344378213	5.12796483145892	6.80970689386751	5.28892359190938	4.68386711803947	4.75603291197526	5.30651763201369	4.78556839994199	5.07430672474639	5.65167460376643	5.06785970453834	5.02393889103018	5.15813242507007
Ap2b1	5.61424482088514	5.96002541960555	7.59793205810137	5.92228395995848	4.35894772396059	3.99211589185879	5.73010786161956	4.30721646507145	5.74558061551765	5.7329074093962	5.94725225574808	7.97447453720683	6.42163458596609
Ap2m1	7.13633923638384	7.78617258698782	9.11968324717354	7.47843350273945	6.85979246545249	6.65737554248543	7.28739050378223	6.43846910328592	7.2362757267113	7.34479389841734	7.22004461694248	5.55889093275172	8.05847158349705
Ap2s1	7.79232914907808	8.02120645562231	8.78270888562844	7.72638362063145	6.94736436376296	6.41122972804937	7.20789844255485	6.18196596569022	6.75335487011062	7.67173806986874	7.60889939688259	7.49492349562034	7.69047753798916
Ap3b1	5.17355907075364	5.27141061644133	5.37885841408103	6.1743822754953	4.04047489272372	4.09581085853033	4.95593895639921	3.73332315251399	4.42131862093842	5.33352885812858	5.31539102586943	6.8196504136274	5.62480829375325
Ap3b2	0.792725000009377	3.70340845241591	6.926021315006	1.61671616492231	0.0215302160728169	0	0.0352853059476102	0.168688692335196	6.44745905123791	0.267738746252936	0	0.157869644743555	1.74139275915398
Ap3d1	6.14176239054681	6.29931480290829	6.5168708843022	6.12505739031221	4.65197217526963	4.31136576796312	5.67723888618616	4.26628333835539	5.7866536519415	5.85645745210921	5.96581001351569	6.54151170697055	6.31120349013604
Ap3m1	5.45084373813499	5.9422362993899	5.71942954584831	6.11055332317489	4.67167748363861	5.45029770262455	5.17631862146449	4.10385151768569	5.74635233345225	5.42726076427942	5.33173066324582	4.34285029458363	5.56500100924692
Ap3m2	4.17148497256932	3.86601087853094	6.9717487468188	2.41615903840814	2.26855375223943	1.1772731149179	3.88011087882049	1.67874901335209	4.35472212512168	3.59996095403373	4.60808177171723	3.12040426603159	4.05139337284144
Ap3s1	8.21233176064984	6.13612441650193	7.36671749041722	7.00215130714255	5.15083171142972	5.48319864968825	5.76259646755017	4.94686267165125	5.19636339864808	6.14807561113541	5.98211972943855	7.57518541187167	6.55724388628813
Ap3s2	3.68051426509968	4.17222510093104	5.15726467370676	3.85750621687121	3.14530934085939	2.95873705259481	3.65988757591853	4.03609240141005	3.56492250358635	3.96335072000204	3.75297897792239	2.81113946654059	4.25718576182186
Ap4b1	4.33024584859649	4.43455237821892	4.11440139610667	4.24601766257329	4.11166494494871	3.49134281173064	4.04732520782423	3.47468378631842	4.13173839082548	4.42523249147778	5.05961904655622	5.36931531390144	4.31265425058737
Ap4e1	3.27195092577882	3.58884815268959	3.88148567122013	3.36307145319955	2.79223551611544	1.88620719663005	3.7166988983427	2.96024310912233	3.28846001927832	3.78791267563029	4.04178488805469	3.20637616861567	3.40513082690634
Ap4m1	5.18615394189884	4.47407106494094	4.40681574380982	4.75467067726577	3.07541063517739	2.97687415873565	4.54868298609489	2.89398445147896	4.56270583839435	4.90817005558118	4.52178732782448	5.52735336585848	4.7977934300839
Ap4s1	5.6878320891737	5.76792652035854	6.73524933443401	5.01516738477321	6.79164138798643	4.08389427476161	5.46436145734747	6.82619741043508	4.88088212597463	5.93941951542296	5.46564304960567	4.59819087252799	5.96383492569705
Ap5b1	2.33823600318538	2.20590037992106	1.79606803727129	2.73632138705639	1.01145280554653	0.887100551136984	2.21009012021459	0.740119268354484	1.83846201416816	2.35564434826988	3.25616587742985	3.26335861467891	2.68366078949868
Ap5m1	4.3086988198949	4.84648019470647	5.25478364397588	5.1635846112031	3.86676101553932	3.32851502832422	4.66708154070185	3.60974548083982	4.15505787349054	4.66795162226734	5.05734875623427	3.18742358012066	4.57815664005381
Ap5s1	4.09018165781548	4.11278421507076	3.47144683897398	4.22418292165779	3.96987824115543	3.80414585282522	3.65435921205993	3.64354272074501	3.72641622862045	3.80034151671924	3.8015559453609	2.16611186667525	4.49822172562441
Ap5z1	3.62968808407689	4.06897487873034	4.10449292510799	3.67290718758759	1.94144688468311	2.43042263775067	3.46881645703455	1.93670739247118	3.48241447748207	3.84148361740265	4.3929932031781	2.49325989753325	4.00839829740479
Apaf1	2.8210177786962	2.60882581397323	3.40151348168374	3.71771480496642	2.18960466432657	0.975234775600584	3.4986629348372	1.10250819025087	2.75443569904289	3.29433882566398	4.12335606753141	1.44574497509618	2.50626307375951
Apba1	2.51718847025559	2.18964455326942	6.23563921321637	1.62045503864759	1.38066885956013	0.120640075422735	1.76278435247769	0.646147558977587	2.80373321399122	2.25609311547141	1.71665089173042	5.16354110518421	1.45487687582792
Apba2	0.112731598127978	0.358815967996165	7.18497167799035	1.29320367131656	0.783416620019685	0.0491584530647853	0.743811878373644	0.081830682510175	1.47230418798829	0.818920954340318	0.122760867016542	0.411755169219289	0.812189610703365
Apba3	4.95860509013207	5.27126927808547	4.57937997266871	4.81858202021994	5.53353092700961	4.26915450778075	4.53160824422792	5.77403606749554	4.12518517885655	5.36785780773245	4.33434387380539	4.56621076274674	5.44358355224277
Apbb1	3.11930747989536	4.23698090298557	8.62474239928239	3.48215290338329	6.08551010335602	0.427905755775804	5.88483915735074	2.5293400816439	6.30779527581157	3.50818788267381	1.82945273485209	3.67224156624894	4.34911762258028
Apbb1ip	4.90941773130859	2.6959716515119	2.55491210139925	2.68471176728164	2.43230657387687	1.37781944510382	3.79967736348935	1.1600163981407	1.94438757191679	4.17763577698054	6.81307948854454	3.3811268771063	2.89485326538661
Apbb2	4.03666234655841	4.53782182784068	4.6848327138023	2.82102069958399	4.29275369993541	1.75357308440704	4.47023061839441	3.93565952450315	3.00361867783786	3.99713898982581	2.43299948662056	0.990601575519404	3.98202685526867
Apbb3	4.18481927070349	5.22282476355007	5.65689603193397	4.37629806561882	3.87139826126833	3.30529423149875	4.33992235874181	3.78979771038418	4.84793836742748	4.37688280255821	4.85260176586939	3.32902859940073	4.76771367196871
Apc	3.80501865795585	3.92780759741528	6.86830570795384	4.36743336317403	3.33550288784788	2.43292283677866	4.49384589004079	2.79074672983531	3.49767039789081	4.08290009764001	4.19772280930317	2.73800411861357	4.23838992614759
Apc2	0.987454148969618	1.16237221824408	4.89931294629752	0.754444522937607	0.577147004010888	0.0578050674725856	0.695541500591257	0.221495792740332	1.18158215627364	0.547359359673731	0.423451090622136	0.615457218038555	0.445855689567858
Apcdd1	7.53253576565289	4.33479225268901	3.88515974315434	1.76429950969227	1.75082792255809	0.0711543889065355	2.53327831883598	1.67490747661567	1.14532792052568	6.68233219551757	2.1641426297379	2.18366680401346	2.69879600227163
Apcs	0	0.411733214624587	0	0	0	7.42612049344736	0	0.327470856807546	0	0	0.0433248822468699	0	0
Apeh	5.1460821608903	5.93082246690428	4.13144902595672	6.23429016698649	4.6271539499238	5.18005554565816	5.03042642427361	4.66392857743021	4.95801329294576	4.93547943505105	6.22730613836521	3.15744254719681	5.83242579949506
Apela	0	0	0.0725194948306017	0.959344813459224	0.0621273510064952	0	0.215675450732981	0	0	0.455954808614474	0	0.178082035920485	0
Apex1	6.42969689892377	6.44521136004956	6.2429318809797	5.3509677216089	4.93273169048979	4.92017317904018	4.81839770755187	5.10203206298898	4.75387275625315	6.06586704766201	6.01815877436734	5.30987713975587	5.66306041228029
Apex2	3.61459875996791	3.53064362961787	2.94463849945795	2.7043626879395	2.7174225861433	2.38968336151557	2.98239468619354	2.28346180543946	2.91902317922344	2.93293150299591	3.36967591118022	1.25654016908754	2.88090566034092
Aph1a	5.53182094213326	5.81486088226768	4.99682205396098	6.61062798418666	5.32469403172158	5.11712119581991	5.63550831452088	4.40111105740723	4.86602265727596	5.74793825046934	5.09834367619925	2.9206626041381	5.79333197938175
Aph1b	3.6974113980895	3.54689398097111	4.78117296603459	3.48208500166181	2.57852330488476	1.43340613708436	3.60177458349933	1.69638967969056	3.50932656850204	3.92926182600201	2.45034770660959	2.04241146593905	3.15736400135683
Aph1c	1.81211673030709	2.19750534229078	3.12433481206327	1.45254568907271	0.958436127532251	0.689629331679176	2.80224361670383	0.6851822878554	2.18104482668946	2.47271721464977	2.44843995153585	2.50003106441062	1.61622867933818
Api5	5.76128929138461	6.57264969813699	6.51783680475659	6.50514483322152	5.37841853718972	4.94990900323125	6.06582352330225	4.55063535402576	5.68867091810526	6.29599671313725	6.53700808405621	5.68997819210053	6.08074684504303
Apip	6.57823587802172	6.00134621677499	5.4696902498688	4.37635856078853	6.82160459705425	4.71743600126642	5.26764522544221	5.75834650152607	4.78383741886811	4.9719890970165	5.36955261318509	5.04856375145202	6.33216217839496
Aplf	3.07857140265417	3.39598164676086	3.30132691282617	3.68862123759782	2.25070043092359	1.91542330173663	3.38558408126583	2.05423729390794	2.79215116248815	3.70692928144685	3.83093410203708	3.6173178645365	3.10382991093908
Apln	4.09248139965839	2.95030496303825	4.49166710483408	1.28262509422697	3.73343255413594	0.0194597092737105	4.56547499566722	1.2917702359478	3.3428196172638	1.22846459826967	0.61328528770377	2.48388103156108	1.80904932307368
Aplnr	5.05099547501854	3.22132778209817	0.53787694350812	2.40029259388973	5.41712723589563	0.0346749756076609	5.02485853648141	2.94359431648207	3.00193379058865	2.75679837596776	2.59965200154559	0.278207466273287	4.19902126645253
Aplp1	1.72732380019666	5.46114423421391	10.0013487916737	4.90401769770994	1.71227266967169	0.316665569769348	2.62548553585739	0.662787180221899	8.31006350281686	2.08773969705577	1.31536705507605	3.31009491768052	5.60483854578598
Aplp2	9.97382409253346	8.93658386847755	8.92591288560737	7.80214896810329	7.713425444742	7.12244090916076	8.77809139334371	7.10478606369436	6.71904543354356	8.21368233904978	6.5825894604423	6.83666707475572	8.5091767095331
Apmap	7.79724109307729	6.82702550884902	6.12496094119058	5.45165778645116	5.40721983519536	4.93466035897624	6.01823540612232	4.62016019978665	5.35595158339777	6.14579772150688	4.89105675686578	3.46508592421352	6.21920537765279
Apoa1	0.288779787135114	1.46191046272511	0.790320511787243	0.324573257444846	0.297921168141915	13.0456796390685	0.0923614153296895	0.1064678525537	0.67351843777308	0.213716738056649	0.115245431142563	0.2826380315618	0.255128690040365
Apoa2	1.65388140598501	2.99516920394005	2.32228205073388	1.93913024758201	1.75740467845904	14.2390838552983	0.894856856692917	0.694992538197319	2.47869899819007	1.21665941937801	1.44310991924637	2.1395999787227	2.61072079294946
Apoa4	0	0.018898372870074	0	0	0	7.55571683783935	0	0.105602470530433	0.24657274353696	0	0.719537003078326	0.032353831773594	0
Apoa5	0.00926709204652282	0.0896176425596989	0	0.197350019965942	0.0377591501839921	9.47820421236832	0	0.0746133904695922	0.0359827191350045	0	0.0118541813455676	0.0375174200017098	0.0132743155964745
Apob	0.0388284930749676	0.181252490157324	0.022086767412156	4.07723708390981	0.00755316088708875	9.27768505776609	0.236758643258766	0.161448132613711	0.0174708677571548	0.0254084133069576	0.00565865202769738	0.187842906737788	0.00441517098095935
Apobec1	5.06268916030181	4.640468561691	2.16210489750192	5.422716031753	3.64676012819112	4.20887700311156	4.37815498093331	2.19459738838286	5.08520533698762	4.53363635160417	6.15719084141577	1.82528786671645	3.94679821743835
Apobec2	0.510624734523712	2.26593723063547	1.25107813414267	2.17708509800222	8.69497134384285	0.260907628558283	2.32190291215914	9.57631355733414	1.89894001437735	9.40709264413092	2.29243966160171	1.95703901073156	7.35962326930425
Apobec3	4.55999321686964	3.86375321677278	2.38731229871153	5.4229337590879	3.70813135425133	1.75533914763207	5.95992401523914	2.24518776037046	4.13774851256384	4.66547565539304	8.79011878094632	2.22087264972908	6.66838456971081
Apobec4	0	0	0	0.0254550707254	0.0675879190070804	0	1.320572398047	0	0.298664367552655	0	0	6.81796585213778	0
Apobr	3.59723043202091	2.22184917412378	0.702492517445053	1.10882794276552	1.09821676310998	0.967764355280562	3.23228721590447	0.642855505847456	0.403106681363075	3.0212373822017	4.30863882126859	0.334488296372535	1.67355095783083
Apoc1	9.63725839881581	6.9453188425102	3.74171712467827	3.12730982214193	1.10453939280116	14.5259217511754	7.29045187563505	5.31254817876075	1.03885196994499	10.236230384675	5.71657147489475	6.64682232140484	7.82357552968589
Apoc2	2.92282827825804	3.53699270753184	0	3.40303505791124	0.528653693622403	8.42852630721664	1.73851518006097	0.673492398315793	0.355978219534455	1.99386225338584	2.99883352059463	0.65968472913333	0.310406463619671
Apoc3	2.33166386413604	2.20082971220234	2.18685438194569	0.532352327863421	0.185649972138653	12.3936789330177	0	1.60368398971804	2.21628234096296	1.41385851206703	0	0	1.51992288290045
Apoc4	1.30137544835989	7.31649041963024	0	0.213665632140972	0.112177135136947	11.2144869862968	0	0.939052545093893	0	2.44292138896227	0.239954684787316	0.0791341606091408	0
Apod	3.74638463605239	4.07004078255194	7.94253553080962	3.23008186349345	3.70424691901006	0.30327214404429	3.67324669369078	5.9243019075628	5.76830254838413	8.19011998740664	1.60711233758306	1.44284636180626	6.11852199124553
Apoe	12.2665620365345	10.5069053695499	11.2355362636637	8.21919126016003	9.15915360719367	14.1152635426922	9.35880686700013	7.28663003916597	7.99420363159361	12.137019840056	10.3169231311528	6.26685391720549	9.33582689016642
Apof	0.466630894453691	3.23082567512778	1.06972966281761	0.583103058529034	0.461588233354175	9.27812922713447	0.79688053170451	0.262947188281562	1.32513261290765	1.67893954353061	2.06463971345134	1.13298221093717	1.79691728979436
Apoh	0.0907690279268214	1.12393469171757	1.05847475493667	0.869597716181177	0.278054796121649	11.4907584291742	0.386311759292815	1.24065114555835	0.207709660814709	0.746872137392583	0.133659035301862	6.2497567723861	0.181950751324268
Apol10a	0.0178434180405972	0.00977604839590346	0	8.01793559358553	0.0156723958171108	0.046413910706371	0.0234231953347196	0	0.0490585981740636	0	1.22989943083674	0.955676869537504	0.0129435222987229
Apol10b	3.54419706833496	0.981558618306603	0.639100718525398	1.81054619029518	4.0808413398841	0.353988484234083	2.49751262430923	2.40097616659042	1.34761228999591	1.70211880728589	2.8617380568941	0.445565473400705	2.10507619334472
Apol11a	0.0667008461303685	0.190434491033375	0	0.7513465848017	0.0856735130472091	0	0	0	0	0	0.883517666986108	0.811692145815136	0
Apol11b	0.311993020287819	0.657281988233698	0	0.135209294180975	0.434756698170045	0.0342713937373506	0.433671520311436	0.041448928458379	0.00405694714751101	0	5.00582573258013	0.0480026424013347	0.0412449772549462
Apol6	8.58948491758188	3.51709528258982	1.32132499000409	4.0051153046429	0.713098348294582	0.214996825840048	1.7488502111976	2.746532564499	0.667317859069702	4.45986181043989	1.21413091670099	1.82434667420737	3.82924498668895
Apol7a	0.915134378510031	0.107287681454727	0.990676937002462	5.24920994458885	0.238361301397033	6.58326890588349	0.662820402785566	0.0185396706196653	0	2.5145574746201	0.503318650184146	0.0945406578304528	0.0212020227173809
Apol7b	0.223504403963567	0.178525372291795	1.39146149729131	0.857407877357951	0	0	0.220317899349192	0.115932592454767	0	0.238670943616274	2.00741978290088	4.42306737788939	0
Apol7c	0.549360373999094	0.553378432025839	0	3.85748343812053	0.150716597046907	0.569477813100623	1.92856351649429	0.058690708776762	0.0597978720013768	1.64193994493784	7.05882740837118	2.112795095944	0.55365253835943
Apol7e	1.40346722502792	1.67816729952353	1.18201369024607	2.30683027947585	1.01350473076829	1.33023753875957	2.34105136748554	0.549694388638357	1.5045837753727	1.88134369269224	5.09421881298169	0.157748399660019	1.33552799465191
Apol8	0.102847024199783	0.20080298238735	2.33836152582137	0.0931687170977197	0.0411269639570914	0.0221867536024444	0.0716790008107486	0.032398578482418	0.0303120424299933	0.544782638004714	3.28410718390262	0.191759309656441	0.131552938133357
Apol9a	2.4316998362016	3.10278400566321	0.143505625780941	5.45145697477803	0.561236059687801	5.48103583489262	1.47120313255196	0.444120134042836	0.607197964261857	1.66123023920983	0.966322762745772	0.145855625324592	0.627041608919964
Apol9b	2.70539771090412	3.30369171593481	0.288857123443539	4.84837846968996	0.900934290995123	6.8998575312664	2.5670123761029	0.715019185745136	0.652341386446671	1.74267465028284	1.9347290320585	0.0823369183864414	1.24753840874737
Apold1	2.86942522526906	2.66128403105952	2.14501154225403	3.08260875769703	3.29745035367529	0.672351341186394	1.9917260230634	1.02908451883985	2.74529192320416	2.47988848504931	2.08668571898572	1.05078331173404	2.153031003346
Apom	0.338366869745583	0.846332632497526	0.713192392174357	0.716269166287881	0.676133573534042	9.56720162474611	0.385820199362694	0.468113492760958	0.428101348017839	1.36375438199081	0.897296991715404	1.1549023109625	0.384183684309745
Apon	0.43731416204988	0.694026165318118	0.700898218305063	0.436504790964303	0.366149095996353	8.16987310891006	0.590144927529979	0.248277551411734	0.519225719920671	0.721713326290374	1.0102240693413	0.814396362507916	0.398988700169503
Apoo	6.20678464222255	6.68711348216065	7.21931217398733	6.32979589248047	8.77036625928838	5.5245327352169	5.26287322814544	8.54112585816292	5.71726888287086	6.37098435920694	4.40146493702258	5.17414260701234	6.53576211367755
Apool	5.9152608984646	5.9175397803569	3.39627069108433	5.8259599952394	6.79816408902994	5.03357499929637	4.76280593976055	5.90888422612169	4.11217745706358	5.18330239277454	4.61840778136878	2.77929969486323	5.5174597989782
Apopt1	7.02561357955522	7.14628710381248	6.38981865554244	5.78202053365188	6.07874173456402	4.95340193334678	5.80945076366331	6.34182302428686	5.60632374055676	6.12821924203699	6.03578958136846	6.86021210701717	6.11606718008826
App	8.8689544850829	8.31126176693093	10.2279027659108	8.45355272867582	6.7427849239366	5.21920696257656	9.28390718726205	6.06566342418613	8.40219376811624	8.73572341248554	6.59042138006766	5.70632137964928	9.82499250373167
Appbp2	4.64827946316971	4.88984394988176	5.84209291401186	4.9338155130932	3.85518482443932	3.34875504823931	4.40175334985677	2.812796284133	4.41412047445616	4.655001228463	4.91912898584539	5.9835680789809	4.33829761286356
Appl1	4.22879741435528	5.36156059928159	6.08684485786784	4.9122975010238	4.20625032785299	2.26831225644917	4.46251436418272	4.60971733363546	4.86565616492405	5.06159253209388	4.64407438777049	3.89430269813811	4.34484335759331
Appl2	5.37696427488578	7.13401234675042	6.90309480391085	8.09415700814844	5.88887208356572	3.91632139712407	6.73585589680685	4.30104595504441	5.86804494362364	6.80900903009794	5.4196810384459	5.48566381194536	8.03262724430325
Aprt	5.27342549706921	6.84111143094182	6.08346237485054	7.11749991931054	5.08447000865299	5.13628848306357	6.11673612403856	5.05284130635276	5.36140609808408	6.21657259850627	6.33858396248455	7.5181581487879	6.1403119513528
Aptx	3.15964122305037	3.43807857125366	4.09845540293934	2.60236966903325	2.83240737775209	1.81623603412887	3.00719290178098	3.11379200687532	3.1190319953145	3.6595581779087	3.12604741112673	5.4744246267791	3.51269048501648
Aqp1	7.74661092503925	5.71861673108838	1.77814909432081	6.19540277968711	8.29868744576102	6.03195029766504	8.83836426242762	7.14236184656437	2.20770927661274	6.40950674786242	6.77754229293028	0.386732673308603	6.08476853533329
Aqp11	2.74880149967248	2.4349166991003	4.9756781358838	4.39466309858339	1.41198213193759	4.25629428607375	2.15833215830302	0.838155833310298	3.1252757420035	1.12369562702137	1.34987773714214	9.48432973623158	3.5950426255638
Aqp12	0.0427348107267285	0.16657978699726	0.0885981882767432	1.12951546066952	0	0	0	0	0.0534504699265388	0.0278186441560341	0	0.60899323832778	0
Aqp2	0.374345601097556	0.133558332927682	0.107790458639676	0	0.151843413271648	0	0.50953615829482	0.0609239768987405	0	0	0	2.88397239453988	0.273765390439333
Aqp3	0.555773426805147	0.524621737361861	0.361129209483327	0.488203666830994	0.234001426319983	0.590093084565062	1.37995250390014	0.109258060006036	2.66992559504534	7.30978120558951	1.93002151695408	1.96561015912159	3.94086293158489
Aqp4	0.036350431106646	0.141260965037206	6.87703352555483	8.05924320222422	1.96484704029192	0.913703073892252	2.63442132228699	3.37610650956347	2.23853598074062	3.50805773137516	0.459114290647664	0.187620535102176	2.97066873273877
Aqp5	1.65774636613801	0.401241409096959	0.445238523231004	0.0623344467650901	0.0386946654878471	0.0437439794176678	8.08218398010625	0	0.283592816703886	2.53550228456915	0.0474028824548281	0.791852000019816	5.76668397065537
Aqp6	0	0	0.189372749343585	0	0.0378907549379403	0	0	0	0	0	0	0.0101769116918808	3.5020749119787
Aqp7	6.64525489200049	2.17679836723962	1.51480870589346	1.43462168505587	4.58589315136846	0.408824573362663	1.08064556815465	2.96341157974846	0.942388758235085	2.73925554615406	1.32441837572877	6.98872053435568	2.89786805443064
Aqp8	0.274346908858409	0.210953151198899	0.020592203570004	8.74231995587818	1.70403740770332	6.99399672431931	0	0.294444040447354	0	0.0940428906272993	0	4.78475270582803	0.176171494153368
Aqp9	1.96979138226071	0.95407688870759	2.00184757499904	0.739398099840235	1.58583951338753	7.86067249095282	1.31217441247965	0.456576841201101	0.781968816614035	4.46165536352012	3.44335491635897	5.87450368279407	0.926984159808902
Aqr	4.49187131004952	5.11541943401373	4.98753903527242	4.79776754400224	3.91396505099914	3.25352612913732	4.70024856305762	3.30000431260006	4.36026659164458	4.86146357778898	5.56039322347728	4.67261259058162	4.78766926852508
Ar	4.1247741955449	4.62936737717207	3.2542463440715	0.685992272595928	1.46087393069226	0.954286012700608	1.49655070957782	2.89255814427412	3.55797759249206	4.09677713770779	0.875453160758422	1.55502898168701	2.55890781160425
Araf	6.5972802004261	7.5576084871114	8.37654589453387	6.73382173825283	6.74826694870612	5.6019112989603	6.71974878219765	6.91185829922648	7.54597175056101	6.86122663117801	6.88914739052086	3.98897381463086	7.12338945925947
Arap1	4.94527422753604	4.32110292228693	3.05062432666173	5.36398197165927	3.88393761151461	4.05974511276894	5.1522630406081	2.72750916336587	4.69377175380671	5.66361414484893	6.05758974078158	1.22711503134956	4.71239338504112
Arap2	3.50992358499104	2.03591038721629	5.82611652792243	4.48553790195938	2.7907445889188	2.34069779287509	4.7801658702056	0.718100318229391	2.98886088921744	4.54907374096849	4.89045230594138	3.18042388558661	4.10311415858184
Arap3	4.84639088829302	4.67958829440746	2.5326757072933	2.64956931426287	4.77848063404939	2.3871633356475	6.69990763613966	2.82936672461913	2.40446862555508	3.31502248336649	3.6707077775831	0.70052157680549	4.59687964252082
Arc	0.515539171556225	1.42287651194605	7.00006150111679	0.507393723515484	0.64002710514898	0.0503584436016792	0.473451581550436	1.1097824616382	1.84165184448657	0.983056489343208	1.37524575102583	7.09627161542035	0.712055914838445
Arcn1	7.09081962114257	7.49218370785092	6.87065920809001	7.78848563151377	6.2991407583791	6.48570761772753	7.01825494828025	6.22571145870794	7.14387800742953	7.25042489315459	6.83743556318063	6.12140535803955	7.59585601489147
Areg	0	0	0.419539917762713	4.33641818425875	0.114253043599797	0	2.99240708011949	0	0.130225654471803	2.54945892875638	0.066336680488202	0.0336823267846335	1.90592130628909
Arel1	4.35186926871561	4.64562138818279	6.25399084947808	4.9788434960919	4.37242473973325	3.79601486014513	4.41616391703968	4.00348348807739	4.24017142132301	4.33869383637353	5.04187570122381	5.80455310076658	4.55594846094032
Arf1	8.41206138219669	9.04928816097723	9.2254607978082	9.20233350257309	8.09703446532981	7.58160878968177	8.79312443652239	7.94851823901844	8.28354359714696	8.61565366291374	8.2808189258171	7.6032116614194	9.35907537467029
Arf2	5.47162240410058	5.91807716819777	5.91923519920434	4.29126093145129	4.97570183624693	2.93698473983128	5.69864536127664	4.29750362133783	4.53502808151881	4.87665347983985	4.97006698475705	4.22012579090864	5.73594630684858
Arf3	6.1482740882386	6.59765498976045	9.30169569994447	6.49581205331467	3.67496676668056	4.16903225245808	6.41176325445681	3.23777271959829	6.43654551659376	6.23496371211689	6.05764168901396	5.36274187678708	6.67676448729611
Arf4	8.73309463189009	8.40099506306158	7.55278673980122	8.97936824610679	7.17909738801924	6.98962256701135	8.00614722011614	5.55181028913464	7.97619588064413	8.11746764791197	7.38700328852678	7.6725769184245	8.58969497576607
Arf5	6.99965284256687	7.08454228866008	7.80943238922816	7.48554596001208	6.96493853468282	6.37056069089346	6.78539809415715	5.98742300519874	6.62038273037653	7.54110595942879	7.36997245924999	6.02068425562848	7.2321203213721
Arf6	5.71787974068615	6.12575731754785	5.3476590974078	7.2670376786286	4.87062956706044	4.52498475048316	6.23411309412225	3.6008316411869	4.92299278168717	6.81263473811743	7.07899711157726	4.62906264125915	6.44375849334622
Arfgap1	5.1334076978844	5.38357111455126	6.44382915871045	5.6119552035484	4.33293272606757	3.65957157625923	4.81259887954478	4.51827993812535	6.36403370741373	5.32541300769266	5.0994755835804	4.53476053857946	5.3854642521899
Arfgap2	5.59634054755367	6.11640529737581	5.58410116060912	5.48488830844039	5.16123508583822	5.61098647605642	5.40065461061167	6.69184253872662	5.10945122990207	6.09938131132996	5.70445426326569	5.37098900598414	5.77646401885524
Arfgap3	5.00853961870719	5.17219379062818	4.41487790687569	6.87169942642908	3.30420399737513	3.02777395501611	5.06239765260671	2.57207670854546	6.12796287248956	5.07127499220698	4.28998790255512	6.42051399277633	6.17068497314293
Arfgef1	4.55980699747579	5.18181756862636	5.9271113979663	6.15770763020276	5.16247862034994	4.4123993964022	5.2607699692412	5.53559440189928	5.31924329394626	5.3062919262446	5.80168474522304	5.7955923327089	5.50809455384849
Arfgef2	3.83246503223097	4.59180073192412	4.74847512387028	4.52854646770736	3.53704142475762	3.44272045259681	4.20463118550996	2.95958581435267	3.7544875804742	4.07185035864126	4.34431316720507	4.60980782438792	5.19186883510308
Arfgef3	0.00261606835256529	0.381457777835407	4.2964291597777	1.4947258172294	0	0	0.657920420708397	0.00754027711010395	1.82904701805465	0.197015388398045	0.0208600446875049	0.621384626583776	0.87918570282757
Arfip1	5.42264844221861	6.07158020493097	4.89371725751845	6.54355352290814	4.8647190444851	4.10400552702068	6.02647195596135	3.99637629117269	5.57205062125528	5.98315067601545	5.35627237131564	3.64050293074826	6.25825528372241
Arfip2	5.0808632406693	5.68573638871697	6.23287712583369	5.89377294066779	3.96264983406186	3.04688851923278	5.2187604783875	2.85210887144488	5.94046547078431	5.26979081844884	4.67062761128877	2.88814913972638	5.60713859079857
Arfrp1	4.64987266231239	5.2563245607411	4.77267071504618	4.91906420245697	5.1634520872779	3.21336470336534	4.99564895383899	4.14250931395483	4.6990551080046	5.19107791948863	5.48069497190087	4.24312257357109	5.38837641242924
Arg1	1.33758158961589	0.763615294352878	0.472036321531502	1.75077674411604	0.203405002860556	10.5550146296935	1.8558385328626	0.686614718268022	1.56283461242604	6.61860531757258	0.71829390481483	0.63088209319625	1.17543395626749
Arg2	0.288472602727555	0.599896238812713	3.32846955004849	3.20952044652589	0.285787508411476	0.513049388431908	3.61252448340473	0.204096956539717	0.939759751379664	3.08623345741188	1.69365482297744	1.63681802439172	6.92141146389558
Arglu1	6.64486996574196	7.63227742143266	7.83189748089944	6.93033307681304	6.64389278935949	4.8836512957103	7.36823766302489	6.10137072933922	7.11611393113329	7.22436898550728	7.74351171581752	6.37799947464812	7.52477450713833
Arhgap1	3.94644767718823	3.56611524346989	4.45427256483692	4.32698522382489	2.93109428295619	1.1357127483252	4.34559562155257	1.14678370884447	3.14291979900689	4.11519432889004	3.69810230928362	2.98451639862713	3.97619198168472
Arhgap10	4.34687323237342	4.70466215089625	3.93722418004323	3.339682232299	5.09215866333861	1.15644923886148	3.57844283916402	4.94085801592304	3.03652136158358	5.56254183580035	2.97187075463355	3.47985733972707	3.85786546309652
Arhgap11a	2.3395986036254	1.60470142722033	1.62658465364571	4.0656916221575	1.185385297712	0.652214733203859	1.9747509279075	0.861921996931319	0.9720648687194	3.07266655596331	4.52634415366103	2.97272189198645	3.26884073526308
Arhgap12	4.70421387771621	4.75394476334851	5.2906115502585	5.68266884680456	4.3582886637	3.5358344468067	4.55083690710037	3.8832515344333	4.25189712354861	5.23129099574213	4.58930577998591	4.54477792199746	5.04538311663773
Arhgap15	2.99919665008024	2.67100017854029	4.27213403897204	1.59031272447725	1.55610883066192	0.691984533050564	3.1671064419558	1.33992874867905	1.02592693319951	3.67748964181957	6.34207366721913	1.49571517433783	1.71456913117616
Arhgap17	4.85067508309651	5.43460042842262	3.95495228488669	4.94290574336622	3.25836334859883	2.67475337605349	4.7378947521341	3.61957988903542	3.81925314970644	4.98903767209284	6.45928774826315	3.09728369825754	4.64676031471129
Arhgap18	6.04602656460148	5.58566245022708	3.38783599372915	5.16593050473128	4.89878725765721	2.87204103300245	4.98030985253252	2.28946719192964	4.01679320851997	4.98072832945085	4.57690128688867	2.92520389217303	4.87848522557929
Arhgap19	2.44069677843113	2.89363950682469	1.94381959175232	2.73061729688403	1.42676185140104	1.38246572284795	1.98626665494839	3.10234653717459	3.20370493923469	3.5165408215334	4.53885951810599	5.68504765578882	1.9519871714726
Arhgap20	2.27240569994081	0.988143414997976	5.40211981897222	3.53131288458731	3.27416711673494	0.0153101507007864	2.64172783518492	3.39328125962547	0.836760100172199	2.28893828537193	1.59944337792601	4.3225006249033	1.75840725490958
Arhgap21	4.55109336325292	4.58628211658509	6.71425942990889	5.58100119732596	4.54639820547214	3.22201130062355	5.0943719118551	2.82335657794992	4.69319283677468	4.98319733988918	3.72822369503348	1.93536300967627	4.34290370477162
Arhgap22	2.26370481144906	2.97040466064355	2.61959237223254	2.00808923254117	1.72291501501315	0.13158302829319	3.61898277003979	0.682320931825037	0.883796155106736	2.53000222647826	2.94012355028694	1.19426013302086	3.97221121888426
Arhgap23	4.71665409368811	3.79645308381312	5.67119263183365	2.5210991357155	2.33794521981408	1.8170449580893	4.11957955413801	1.9468536000493	3.03893872217962	4.82518156899387	4.05969767551674	4.0666351069943	3.00911622135884
Arhgap24	4.86617005441587	3.68277334117654	3.20253152787882	5.0662309820469	3.6970577935765	2.87339149677095	4.25812811277147	2.30695354849557	3.72733856051815	5.24472158531456	3.77033361484962	1.39399627904682	5.21904717569689
Arhgap25	2.86307410949698	2.2721589854043	2.95734173345365	1.27049659492407	2.1974446093819	1.03915270668194	3.62314778387774	0.800502381874109	0.958854276752966	3.53004900698267	6.18140620879579	0.720942786714992	1.7831780191132
Arhgap26	2.88814961557542	4.14543348201933	5.42255881787715	3.38505438281705	3.85281042715109	2.06738012681717	2.80494953561986	1.76106863441041	1.85413712164865	2.39101438455796	4.09139995485998	2.17275525387576	3.7256735101997
Arhgap27	3.59829324302383	3.62115265667915	3.081367455872	6.12320930627968	3.16020866903598	0.910552927337748	4.75361419030458	1.82173011036758	2.56739789800866	4.33865806749332	5.85015229279752	0.490172005479564	5.24728678491327
Arhgap28	2.48155306742085	3.7478321306593	0.432562223150997	2.14090588755009	1.71237615258525	0.262802611550976	3.27316713020302	0.758953854637737	0.767700046023295	1.867281984283	1.91627433069885	1.7411459662694	3.59363520239775
Arhgap29	6.95040532852905	5.11519555129077	3.91380643883558	4.1089501710582	5.90139540150995	4.7721126811246	6.80068719648292	3.34565212551644	4.24614101903413	5.24998614971595	4.52064201788684	7.42878472167365	6.0324257402984
Arhgap30	4.12402737244633	2.82708664359741	1.92596090006904	2.4696426339261	2.39925858714838	1.56207837644627	4.17457592543107	0.95963204580186	0.935000368061445	4.19655659665566	7.67241150433143	4.28230932837251	2.36007104100647
Arhgap31	4.22783637359049	3.79656124490659	3.55651374731145	2.90474385943233	3.89587010621741	1.53141382258646	6.05731841739344	3.03090664240407	1.88661965626718	3.66255368496072	3.05625744432574	2.21591595133218	4.98722096415268
Arhgap32	2.66966481260845	2.97879577521837	6.48585896720826	4.59894051366695	1.93321482604705	1.55357973115672	2.98731289498825	1.06285425267135	3.39424685272988	3.97775898684142	1.60037938857678	2.57210908357216	3.15606734867656
Arhgap33	1.52901954821762	2.46017667038268	6.53014560973144	2.4214862384573	0.516077195596298	0.258532214797868	2.54998699775013	0.514961744312639	3.85646258907429	2.77348803176481	2.76940457842865	5.62061067312955	4.52706146657049
Arhgap35	4.34909044689179	4.631213130687	5.99857032835872	4.25930652140477	3.496301511106	4.03400240304461	4.58230500567438	3.23329732055757	4.09624992220731	4.25274214474037	3.22271099812665	4.83491194342805	4.56311021674147
Arhgap36	0.119560113816273	0.664997302793912	1.29440026564722	0.116006163527339	0.00902448887345191	0.054645482633828	0.07661690414234	0.0473326267651773	5.12514260923609	0.0664437987458262	0	0.0880857100081336	0.0386680855720888
Arhgap39	3.09646432997769	3.40300856196966	5.48238010672125	4.1173073734632	1.55387525727729	1.00607960969542	3.25492022664756	1.31870405897321	3.63619616268407	3.38415409366492	3.43087374000275	4.11675402832741	3.32547230264708
Arhgap4	3.45871084881922	2.85556069976813	2.36469235730051	2.32286449041221	1.90397625000418	2.23692554675559	3.82937937691739	0.988492878192815	1.16810418825646	3.18798561239466	7.7860912000101	0.395255047482742	2.58349044425045
Arhgap40	0.118508699825651	0	0.571339139226001	0.0282177438561876	0	0	1.03398175674559	0	0.0632498432982169	4.86621856668052	0.051286612289509	0.923151873069129	0.814171747117904
Arhgap42	3.06269239392668	3.64204038367218	3.34267733671597	4.6151486139793	2.92906044459094	4.60446578992608	4.40013063319894	1.78970738802653	2.11027697191016	4.24447678770882	2.07322075325524	1.88326587167568	4.04801147895298
Arhgap44	1.81069389536764	2.86992053612783	6.20490221298282	1.88397036863264	3.35343722104954	0.424060924293544	4.86951678117502	2.03990584767154	4.2333057618431	4.24078238478688	0.574420123299618	3.21446510829331	4.36583617202424
Arhgap45	5.12488670522384	3.90505497905632	2.75576861343802	3.06311093528634	2.86216325561843	2.55371353647194	5.78559045585548	1.50839708475759	1.32514025345768	5.00789682824722	8.77716925948185	1.33150398551875	3.87255852080322
Arhgap5	4.82617515008194	4.85876117746793	6.46126774956992	5.94769255503781	4.70938721023811	4.18363433126517	5.14654888473184	3.78157335744172	4.13299545418976	4.97004746173974	3.5896275866504	6.2015518293445	4.84866340543571
Arhgap6	2.78369952882997	1.93944158453575	0.774770769721688	3.04425397368481	2.29048092695253	1.79670161211433	4.25293212309342	1.82831437126394	1.28642718603447	2.34984089169949	3.44879153243279	0.227245165803068	4.746106572779
Arhgap8	1.03253838981297	1.00043771635567	0.286178973406979	3.02803855404912	1.01841384725747	0.121965135744631	4.31889066126157	0.262183329499982	2.83137326202952	2.09046206778764	0.41272302472547	1.76315204335066	5.79550929976486
Arhgap9	4.23819579809066	2.76798423594775	1.27675882787115	2.36405069045431	3.00866162393569	1.68610910281051	4.43891449838474	0.90642590803057	0.973708654907508	4.75686820992426	7.30017181149466	0.807103962880363	2.42334545439481
Arhgdia	8.59753572920051	8.43819545802347	8.11075752347999	8.21760452096412	6.78886382640579	5.51216424974356	8.38218334595872	6.02696385598329	7.09141954389658	8.09736825756375	8.7365025897293	5.56948622961221	8.86364555169689
Arhgdib	7.05450580942143	6.19448089062331	4.40114941234164	4.45744217477082	6.20774660896919	4.12474378619338	7.02848809171794	3.95985750875823	3.51926367089466	7.89993305778338	10.1731366356431	2.66947829855621	5.7039847325962
Arhgdig	0.478255978658103	3.94463306550312	6.61447078638676	2.17028551057549	0.474507234809312	0	4.76659051630613	0.602591949181552	1.87641089975884	0.978917057557857	0.679198821029381	2.0701895057592	5.04662414699402
Arhgef1	6.40711312952332	5.94336851082699	5.60839005255522	5.5784100568498	4.92143182686973	3.98225088421138	6.79285941086274	4.48009408147412	5.78051743983298	6.62665839261855	8.62024366826372	3.73281534433376	6.38691972404878
Arhgef10	4.60223254395022	3.47462404362645	4.60661368288801	2.86959043666316	3.15946211140792	0.85858810755535	4.27610358218497	2.18158557421725	3.22295640623955	4.57652493028568	2.77488946170328	4.01709488532305	4.90327501337963
Arhgef10l	2.97866971522527	2.76138374360739	4.26573734283333	3.79059062921306	4.34582623252315	3.02564293872608	2.8112794005567	4.50837189371228	2.6642878652027	4.34839075835949	2.13442482226139	2.42522005670142	4.29795464407907
Arhgef11	4.56762691149574	4.92345785332543	5.21895172566872	4.95340752895678	3.25495307348171	3.21095323396437	4.68081513377936	3.40109679925709	4.4399177412429	4.79774641370104	4.00987046405324	3.66426343610228	5.01504197049157
Arhgef12	5.03562840241433	5.39678664002757	6.07755247472976	4.46224117817864	4.86170965677585	4.12965424836049	5.74694240056622	3.66665578063972	4.15584446861867	5.57449674662707	4.04239189783946	3.20843234601717	5.35495025734443
Arhgef15	4.43983291918822	4.32999755647979	3.28260895420282	2.17668335961863	4.61747616999533	1.97848554798301	5.80512176421789	2.7990559233305	1.84284799909705	2.63739481389542	2.30809502943445	1.54601108308058	4.18349225937601
Arhgef16	0.644234613255217	0.499261597448723	0.540302206906002	6.37465045266045	0.429061052519904	1.75578950737191	3.65626759116763	0.321981011678071	3.1207670556185	3.88521169172413	0.220867911587592	0.289022865477436	5.47116380477475
Arhgef17	3.29191382511534	5.06709229969696	5.33440991472084	2.97340533779691	2.93692656963302	0.483570979090668	4.12292078819878	3.61631373597744	4.37619067173415	3.04112632306632	2.62624917387516	1.19004044123059	3.786148014297
Arhgef18	4.31713891037623	4.298558022454	4.86390166369751	4.46460707838879	2.92622292309235	2.99434510013374	5.08863012080939	2.44516188187344	4.42348903268254	4.83930584404052	6.22794451163494	2.79545351466441	4.44214733275611
Arhgef19	0.869968572731696	5.47314589024354	3.66032093199598	4.56244311131249	4.33520616022967	4.32220458199069	3.16224297908456	0.38636831736005	3.22016659846595	4.49224984200143	0.440296491037507	0.405707707124355	5.06706016097173
Arhgef2	5.12838564901695	4.08421989625204	6.63449378197833	5.13990797706302	4.41568965135546	1.59606604652116	6.75441171472721	3.3033029956335	4.89901774531152	4.72406013870362	6.38067624569775	7.22623427010399	5.75497035608032
Arhgef25	4.66395029415408	5.68540328522912	7.57883579322432	5.12870245857528	4.4302549007229	1.38348789635576	5.10105589855553	3.88834523140204	5.29271188118151	5.23926946698125	3.70972295777698	4.14726287330081	5.80804614383652
Arhgef26	1.35131707064273	1.4838755131365	4.57872749214102	3.93266770750979	0.858081183646566	3.36638464831665	5.41902024928484	0.536950933261495	1.99634505087667	3.01611096797026	0.457651908759807	0.619147770812726	1.74591356295943
Arhgef28	3.64466908160224	3.64962338348603	4.43091469523095	4.87170589990151	1.6397177393168	0.0679478176354033	4.55001223041062	1.18198445228256	3.86435722934393	3.57742073397278	0.321607211984307	0.760469071283254	4.31148024243044
Arhgef3	5.09041260433515	5.72103870535114	6.18468058253636	4.95724215890346	4.82247508593515	3.82436891076093	6.56739154360205	2.78390422878739	4.09613067279839	5.46261648647477	6.52021413272918	3.97961661154674	4.49651984893467
Arhgef33	0.153056021285253	0.355477557133728	0.782437378339128	0.189968882129704	0.0380357713523584	0	0.478178200892584	0.0254011052065321	0.973287228502684	0.0721970863707022	0.219097630466603	4.08332772561655	4.32352096677679
Arhgef37	1.75529782487246	1.27316515057903	1.32804991203233	2.38144506791507	1.5684833640327	2.34137049049632	0.939816585915215	1.34499327806626	0.475420230966196	4.39763678730032	1.59750533589511	1.55662127114872	3.84204195541256
Arhgef38	0	0	0	2.58380292968898	0	0	2.18693537716116	0	0.518210816927383	0	0	0.152970805285785	0.658473185130785
Arhgef39	1.27349529173334	1.85578806182615	0.660311811099192	5.22044125390203	1.22036240852234	0.474469966802961	2.24391382921485	0.432732389368775	0.889916075657502	1.9692773453844	3.31274821298161	2.87643078677875	1.47263411756557
Arhgef4	1.69050424672579	3.96860130486881	7.63131871632589	1.43718307883397	0.682016111448097	0.300105433365983	2.26275529710987	0.62545538758372	3.34749673539382	4.90183691525105	3.20968686894944	1.08200799533791	3.35266128851899
Arhgef40	4.83787281762489	4.25846396419552	3.50820984911114	3.70467195628705	3.45052350103008	1.61625785485183	3.80539583192935	2.31308040606894	3.20334484593903	3.79984787966367	2.57586403693826	0.968645595064412	4.90465125864507
Arhgef5	2.74720680245537	4.09378223213656	1.34212534531298	6.00377857525363	3.46709267016601	2.99451535657621	4.94261158862865	2.15198508722951	3.98460305338294	6.18486120055044	2.13961381010245	1.11497450785704	4.77410714348436
Arhgef6	4.70422996941444	4.57203621179007	3.87096469281954	3.15092995013602	5.06226164437879	1.34380648682549	5.18622539911097	5.12875931887014	2.54060658356223	4.59268359336701	6.26881121388223	4.4576361458247	3.90385813579232
Arhgef7	5.03759806694313	4.87354190688583	6.25382737288781	4.74650950063033	5.39171875515159	3.43105221889121	5.57196078195944	4.48672392637872	4.18567375163644	5.09718715549485	4.8636921727136	4.54257652522585	5.10622872387328
Arhgef9	2.57546141110335	3.12444561551664	8.06038633455345	2.70694814835257	3.18497482291536	1.0993395565999	1.88305519875271	3.03699233816276	3.92279628896675	1.87764906789472	1.50275614934267	0.626935464229746	2.44503216064919
Arid1a	4.75958190397259	4.76644098241544	5.07304590716461	4.93616784891499	3.22681038391081	2.91552064813803	4.80017978785873	3.29437765085807	4.60138565182803	5.11942492891549	6.29004796071759	4.82157029384223	5.22689921997183
Arid1b	3.59906698514369	3.93165501138359	4.11379213843589	3.61070076227804	2.47599028455334	1.85342089407658	3.36290970874394	3.07002800539005	3.65759567718857	3.88683827676949	4.05752931230419	2.07058573239702	4.35602218123444
Arid2	3.50310925534981	3.9920752156274	4.11300441706244	4.03601731832092	3.03884370402671	2.30278741533584	4.24834473427822	2.43165876136694	3.86664933778414	4.28406120496854	4.49501115950788	6.40485196985043	4.04949693446789
Arid3a	2.03854300261673	2.0703435719746	2.27080464636247	2.06532843262513	0.909725066167623	0.496448491226424	2.28390546903526	1.18642346801847	2.44314977493398	2.45081407656875	3.78987644836693	3.8580517826003	2.70866688289366
Arid3b	2.09821389418122	2.22872714817448	2.55904994777636	2.67952825511133	1.37100462462944	1.30695465006236	3.44630319660743	1.72707813015235	2.77374429740865	1.84109101577631	5.14085792350099	5.06148150527093	2.59769466846045
Arid3c	0.0458687541442354	0.0479630316677989	0.291852848082803	0	0.0148728050563999	0	0.0327725618780365	0	0.0436508675274143	0.0827670315417787	0.0330702039623701	0.681216474002725	0.0171786126434749
Arid4a	3.86435930822021	4.18690611493773	4.88756429184227	4.50118709845617	3.49863811010359	2.87281091023232	4.67504791272704	2.66189318812189	4.06054404417409	4.49803068352245	5.63426670994192	3.96718482570131	4.15714174832782
Arid4b	3.75228632901401	4.58292145530955	5.27844161180874	4.47272086125617	3.55264857593261	2.70711303048463	4.68700213366818	2.8686219538161	4.36769870323812	4.53867357732772	5.31253794291482	4.79631355619087	4.87265194626009
Arid5a	2.17989101603639	1.00604944566856	2.24239917876211	1.90519929355214	1.51723499867219	0.374343861871016	2.40131870312002	1.1995187231787	2.17790582389894	3.1925354944509	4.16466696833468	1.1051304937371	2.27984900486421
Arid5b	3.13466401046384	2.63901333449777	3.80672901637829	3.49732932484605	2.34963688308436	2.68800254537158	4.34206178424504	1.82054541031391	2.92761796756963	4.29230089261416	3.50018490255664	3.16519803298663	1.95266439219667
Arih1	5.11973460219494	5.64201687780843	5.94918657569514	5.63644920448527	4.94027513570122	4.1654953209894	5.23671954884289	5.81275035821289	4.84424307253684	5.75315721481898	5.65756358615053	6.8487274401031	5.70034204312605
Arih2	4.60132064525304	4.70840812938606	4.87574339145546	4.97287743185924	4.24330355331846	3.84046503744628	4.30255804637124	5.27857260907953	4.16494771674241	4.73758351276405	4.99102508992933	6.72786051649814	4.67739952614803
Arl1	8.32823945383873	8.46190957903634	8.56097593664581	9.34694676200862	8.01792394665847	7.37494293263078	8.16043329750011	7.94934582626134	8.56328803818016	8.43270840585602	7.11422819901142	7.75264602396298	8.84602794313369
Arl10	4.26799429994699	5.70584551269102	4.68173250704274	4.36497347484289	3.00945137001461	1.91414540478062	4.71899910211489	2.23995570709881	3.34734540706934	4.46287650900817	4.18914227267989	1.25463074828658	5.25594070700612
Arl11	2.5717042741821	2.16066095621552	0.938594045896456	1.00504108277195	1.25365319560132	0.350094121904985	3.4320703857516	0.341248347860664	0.494343324739286	2.58079275808108	2.72595345445199	4.56263186538215	1.50762051565865
Arl13a	0	0.0180199369639432	0.0766511782115599	0.0458105441171417	0.0969229975520527	0	0.0346398877306385	0	0.0348005813689253	0.164452958210693	0.0717319985323944	5.28590263920839	0.0806100820213285
Arl13b	3.74399783371338	3.95378615744415	3.7964257848198	4.03551846469942	3.23959384272061	2.3087960278441	4.40952399487236	1.97813216186984	4.08971907022399	5.13507975655301	3.67546216844428	5.76882873663509	4.39234370447226
Arl14	0.0408714569605989	0	0	5.32374262684334	0	0	0	0.100190518745459	0	0	1.13669950509739	0.0325735132538865	0
Arl14ep	4.16299978274575	5.0368502984411	5.47221606991055	4.06391129226974	3.54615516120484	3.03961692608569	4.27746323748162	3.02095126868951	4.52660182516755	4.51357823761448	4.5294229021927	4.95133626361855	4.64540688513738
Arl14epl	0.113860171772702	0.115797127701739	0.244972297297571	0.102686056568233	0.156469034120211	0.148120943890932	0.297923545917702	0.0794683110149177	0.110431081274648	0.243053976785261	0.115986631153113	5.00629838037756	0.138309500905101
Arl15	4.10438643130869	4.73305715925193	5.53331874186127	3.4342927727238	3.48643731962803	2.62545165552071	5.29320406877626	2.26813157462685	3.39278649998358	4.52369416779594	3.12719853974004	2.33509978527649	4.02240198492021
Arl16	4.13308404143943	4.40599428216663	5.07566555032145	3.78955056704272	3.25941290942763	2.69431612225435	3.68092053068311	2.43100590266688	4.19019919282051	3.70171610067295	4.13594355207771	3.46725524367278	4.08064085287389
Arl2	6.35673373379782	7.04075067374824	6.80365644517353	5.39857192232945	6.28737484813199	2.81309993482302	5.68497860584628	6.2001568630955	5.64559444769935	5.65060431514012	4.97685691503712	5.22453980017272	6.59098624083142
Arl2bp	6.25362658610962	6.55703970614628	7.50677838694977	6.68843012900852	6.04664380484776	2.20862346742528	6.66449864914313	5.94506457465373	5.83855445401958	5.23474652888108	6.23762985936339	8.23101657415106	6.08969460215875
Arl3	5.83730733230653	7.06517819464225	7.89727494148709	5.02221180629339	6.46500368608721	4.24419565627789	6.37858672027885	6.92042290841527	6.91229832251188	6.18691597457422	4.85349306054804	8.40180542299482	7.26355420713551
Arl4a	6.9572185344625	4.87734517107177	5.31828529669242	5.85307859831396	4.14740637011968	4.32143132020204	4.55567639688271	4.39139468556098	4.18759781730279	6.56630535299168	4.35001554848493	8.29131006685002	5.0512493292564
Arl4c	3.2509204733542	4.45738663793435	5.44166236338586	2.3051722333726	3.09577096311501	1.18987368344139	4.99234230432507	0.922823523660407	3.67791469412271	5.82864352073106	5.95181505143369	2.75361024819575	2.66249112581056
Arl4d	4.09679797255285	3.90327870457656	4.60527133956305	4.00764534634159	4.66933101436717	4.68105571496583	6.22463936089315	2.30801650406022	2.69129086372712	4.62715264751998	3.77147585708602	3.39376669746933	6.31736631367603
Arl5a	5.66413736841716	5.56311919651091	6.34773202381469	5.54384768756562	4.86129537425288	5.94388112245777	5.91930843637789	5.06034398736983	4.73535246326539	5.66145832376183	5.90442902971726	2.25788549793283	6.48119379999568
Arl5b	2.27438064975158	2.27950294068641	3.88027924449351	3.38385376151958	2.5556262360464	2.60770905532106	3.46435977479014	2.13639300017228	2.44365562065416	3.65292874746361	3.22772479536318	3.69008938445196	2.76711043912242
Arl5c	1.59813988703347	1.40248157120158	1.43923596398026	1.38602590403787	1.02461560086827	0.374431215054132	2.56288915490961	0.565080520313716	0.533665926297093	2.1284022685542	6.21914742469607	0.723429507875491	0.880946280268526
Arl6	4.2660392550259	5.0009771931024	5.86998632198261	3.29398503579396	3.89107111339524	2.28191704945852	4.51010784631322	2.71407111013306	5.03206608124834	4.15375642093246	2.99936590241541	5.88848803717431	4.80037610281149
Arl6ip1	7.7702225051036	8.30454200279151	8.76886811173632	7.68346315258791	5.56001838684842	6.99922980089672	7.9039944335763	3.7685008479311	6.85890626576938	7.33900998119111	7.95739400383458	7.28875143246388	7.7247761499804
Arl6ip4	5.80982084359546	6.18448939275889	6.12991469838241	5.70259895079746	5.47312157744952	5.06367982126075	5.83031642795301	5.57867432212947	5.20702582161872	5.99638980717106	6.30504482183991	5.53985473538321	5.91159403492015
Arl6ip5	7.23039571154124	7.62342772926101	8.15541735759403	6.93018604832111	7.54052795875906	5.25632222648393	7.27208760278942	7.51481680541464	6.89282333538355	7.44789666561214	7.45056654964251	3.5126630041609	7.78036820972342
Arl6ip6	4.24961940444113	4.63896962924318	3.79899690255596	4.73286242246208	3.98849895411962	3.26877167949605	4.22447901652142	3.61197592895897	4.12749560703644	4.49838491704864	4.91149319069923	6.22339028507759	4.3414562593685
Arl8a	6.39698813896213	6.17175099168994	7.92464930971725	5.78818764869338	4.65391730217443	3.64566201310767	6.23562180653143	4.28994051671061	5.63540815555953	5.71629814166266	6.24582073119251	4.07543211327217	6.43989539436945
Arl8b	6.60017070293167	6.93581849254435	7.85740725218835	6.33512996726118	6.08874653354096	5.20906263931325	6.09648579591974	6.64498915217208	5.5783836851776	6.76419999923915	5.9410421304884	6.64132774603093	7.00171291939924
Arl9	1.88628437625426	1.6786986354757	1.39523013964229	1.50770724964463	0.451336054035408	0.890270589520418	1.68150443803302	0.463895306439806	1.3963296722588	1.6497559823408	1.9839295124087	9.17216174129058	1.60892810980346
Armc1	5.00314039285776	5.29136892686792	6.38187531603687	4.9377524336152	5.45555604241327	4.51293525513598	4.80674011221088	4.29405179990885	4.5066460973357	4.82646350559989	5.08016839810973	3.27290177519663	5.00080346949293
Armc10	5.00972653038295	5.27190532570853	5.0077109767589	5.43253299900275	3.90979139702384	2.88583217222504	5.05855814564325	2.70369600220091	5.2789660850436	5.05695950706529	5.73982544917658	3.47742674502699	5.93958248545861
Armc12	0	0.0975909031009348	0.0317688533911111	0.1326143319686	0	0	0.0292011354782253	0	0.174740626475954	0.0724571933570343	0.369604708184853	8.55637952662633	0.0952828927901641
Armc2	0.679642073374388	1.32614334725828	3.02840938069938	0.847955137308674	3.9674000877722	0.240654359846798	2.2051224006565	0.364592186227133	1.62325170535462	1.664004248029	1.36436027229875	4.87227435306974	3.78439237404654
Armc3	0.149763940774115	0.0610523027146425	1.00580627757054	0.333866479581351	0.112369911020292	0.0304226750255559	2.42471481718486	0.0352211017946604	0.373462834228793	0.120167006430024	1.32661784885882	7.15590129854463	0.188804173330871
Armc4	0	0.00797563094222581	0.672211428610061	0.0108309130597124	0.0208144336955175	0	2.18238502924989	0	0.103968388969676	0.0479481853994279	0	5.49132695096952	0.0307061087614091
Armc5	3.60513040137024	4.03980817725935	2.97450013923169	3.65062785067592	2.13257568347388	1.64524924261637	3.52750915019033	2.52477916132295	2.92639449295894	3.7487394837749	3.78497724246006	3.14710764746297	3.99641365694868
Armc6	3.07313971306017	3.41453454144083	4.91452281251379	2.87637570977745	2.90332602345997	1.82923839741115	2.78826039867564	3.10826923717012	3.42938211360937	2.98664255303395	3.17583024832274	1.77809300450108	3.04763918418219
Armc7	3.01979440553245	3.48878574268266	3.41965002772451	3.17313512771222	1.65149554603437	1.96591796649955	2.91198311826977	1.29476184974466	2.23101978956111	3.56445758257628	4.6884609059462	2.2488917168554	3.08001707665686
Armc8	4.53178984496807	5.06670173050715	6.14777144455458	4.71835125355522	4.26886033601271	2.91973520115263	4.39917181194215	4.84211526051406	4.33003475133135	4.55355618037454	4.87365708424251	4.29949915161266	4.89429793900745
Armc9	2.44837956153714	3.30683971819879	4.89069392813377	2.35761507129215	1.46533847853972	1.74995836617189	2.85935359045741	1.24349016092	4.05236351195698	2.41985670158909	3.32341970489505	5.76932959480893	3.31019520489062
Armcx1	4.58025253749524	5.36464140149889	6.78860453022467	3.91691400914392	3.09273186724	1.61799493179925	4.96849388095115	1.91807791210247	6.03592664405971	4.5521794601163	2.99405183097545	1.66139357246293	5.46181389467602
Armcx2	3.63421815951316	5.39092547657047	6.04600958721345	3.27192572613466	2.80946420663212	1.04587747432497	3.89931183696722	1.838855751734	6.30949615386638	3.11024538528974	4.09734530475322	2.10373379631832	4.94967611812057
Armcx3	5.19492341090907	6.37560955288884	6.86192212922969	5.71969376097513	4.70133165158914	3.21339960772873	5.64826498911067	4.7614784509967	6.53085948758964	5.55031920887563	4.58561278211349	2.07221713846233	6.16695382471231
Armcx4	1.63830284349869	3.19188410101481	4.68617376128395	1.58936054799138	1.67797890907129	0.504863245626401	3.09877186742494	2.57170615023427	4.4645580456426	1.85721158284904	1.65502219886964	0.491759672323945	2.96664696764702
Armcx5	3.44295653096921	3.94536492090769	5.1429409160026	2.85936606193177	3.21884151190191	1.55362070673671	3.27341713979751	2.37359740289206	3.7392327176642	3.38751381732076	3.67880434948786	2.70261217099616	3.65716966833718
Armcx6	1.86003173358665	3.98014852906022	3.30537475792542	2.66955476647613	1.45932467622001	0.592332986835734	2.6488746129325	1.85389795909014	5.04730746453568	1.99793602023643	2.33059174887654	1.98544770014084	3.85923821747202
Armh1	0.394042563168411	2.56860070756176	0.604470306600387	0.10171391684635	0.0590369113361361	0	2.68648656751235	0.0748511990266733	0.65211810481013	0.127966532998153	0.0174421789745066	7.04109048071407	0.690569212814437
Armh3	4.11127487085473	3.99891589322036	4.02972771009099	3.97143377597097	3.64833336821873	2.42525876744985	3.36782482632529	3.74294127196941	3.7022905532733	3.96480372301069	3.65568910065165	3.14711325813552	4.08357385354818
Armh4	2.50758474540162	1.58835239510534	4.81221422388882	3.27792319254393	3.89860680942462	0.131489125593073	2.52339531053564	1.90056073124522	5.19704689829764	3.19695398027955	0.657067745949191	0.9252742846215	1.3357854938059
Armt1	3.75672809782067	4.31229950857101	4.81725490001172	4.19083507085752	3.58691993882688	3.58749762650817	3.8234734063023	4.623321458564	3.65689742414071	4.28053068569375	5.23905899737786	6.84824899412767	4.73074156130778
Arnt	5.36273560262904	5.37714233724643	5.28501478032987	5.04040242522441	4.56648641012074	3.88893671671529	5.21331003403467	4.75391271226735	4.75226577665052	5.4661360440102	5.21365382067605	3.96113323518257	5.31794733989788
Arnt2	0.206596590088848	5.05302463242398	7.06907894934806	0.914413428666785	0.399614217916144	0.0138349331095824	0.308411660294234	1.3049908073592	3.38910714710509	1.46737947141441	1.53457161234102	1.37065339285147	1.04544982664551
Arntl	3.15694359770603	5.29990740310602	5.50804038301888	5.6895314989901	3.85350659294987	3.65058607763081	4.11478841032314	3.97833646447133	4.60888388227944	5.1372319708576	4.50476169442572	2.56777109300162	4.86955389586735
Arntl2	2.92642464334321	3.16716133718365	4.15652987095022	2.4202614208906	2.37786895316261	0.902613577306322	1.85824315715128	1.71824464515863	2.19161667102493	4.48672050457917	0.945370781301851	1.82291071007942	2.67039628215818
Arpc1a	7.13499065397677	7.34252657123697	7.97955918175287	6.99079812308091	5.92956995449891	5.53218230755076	7.02566609015159	4.92199508184076	6.70176842752028	7.26752185516797	6.35867023069594	6.9817514750756	7.61485814100623
Arpc1b	8.18773262712299	7.64684665101828	4.58433825881708	8.39537909390032	6.06955338894347	5.10217157991148	7.4983349564776	4.63068615212448	3.91118425285984	7.83915170380223	8.65544519265224	4.67094883467436	7.95659123577327
Arpc2	8.42466032568527	8.35227051362325	8.67551066165204	9.06982622632014	7.94786599242751	7.10671234178965	8.64441438475586	6.67064080530564	6.90368103598467	8.77135091634747	9.47818669303755	7.89116016578529	8.22171971159603
Arpc3	8.54538042791125	8.91283093118871	8.81022888630484	8.98599773573451	8.13794242573823	7.05952715384209	8.69551524846648	6.53055809816875	7.16829783196022	8.54746638707326	9.23626918937673	5.74460327817158	8.69607007415997
Arpc4	6.14200305630314	6.23243151643175	6.5967050396059	6.19916312733694	4.60762530801786	4.08501253935837	5.57768908198902	4.33761276836256	4.54713200111342	5.97052297884537	6.76100316631846	3.66163259118817	5.82555206085895
Arpc5	7.74520471395219	7.55770034171992	7.58690983781255	8.448288278602	6.27151326984021	6.19750459529955	7.78083311019571	4.39712704159615	6.80902896005712	8.03103971670844	8.82146566892978	4.98172158913673	7.77420809230706
Arpc5l	6.38333060173253	7.09938448226128	7.45412178896279	6.40140713988593	7.3263284298757	5.52141207572059	5.99195445298636	7.43478098466516	6.36928097105999	6.94397854246137	7.97044412563393	7.48968456937756	6.88356956161695
Arpin	4.21870189452374	4.66592885900609	4.34555962214443	5.71845072041336	3.84467811279958	2.11636908747984	4.80512726076524	2.3881445592633	4.3260803313725	4.64014829030624	2.82152239748982	0.961002563110878	5.30100597291564
Arpp19	6.72629564982794	7.61931669023011	8.73089582915098	6.86983343466056	6.73296161903728	5.9544139355395	6.57303832526361	5.86440884433652	5.5217259265168	6.62048164721966	6.67048129975951	6.23926303955743	6.58621202821904
Arpp21	0.0627636651296515	0.238960436178438	8.5001533476212	0.615883108252525	1.0127804085835	0.0270103334227827	0.219553980608102	2.27397943355474	1.66943582305455	1.71476063651011	0.546218650215529	0.636693092708699	1.36911818133017
Arr3	0	0.0698556914852654	2.31823437038757	0.0778823628827578	0.138187237926842	0	0.0955545418349139	0.248197420453004	0.12626650410582	0.15320186259795	0	0.0963180682385382	0.0733103560221262
Arrb1	5.12743760198429	4.64465277606396	6.67098974409593	5.5573991410504	3.18927139109601	2.12358806501965	6.35219960243036	2.97306429490913	2.80336430685558	5.54009140645956	5.69937478154073	3.0775264223623	4.72539902109116
Arrb2	5.62675020047009	5.29662848847241	6.0606156419642	4.05739802794077	4.28406100822223	4.109901942197	5.27862589499487	3.18498025431957	4.7406939583095	5.28758506505456	7.15644924099074	2.57600322770011	4.78593221000283
Arrdc1	4.02613128455538	3.71939486991046	3.05015838721631	5.9453416912743	2.45404644314869	1.39235344520857	5.53926439693606	1.87300011671079	3.97555134881059	5.02261032867923	5.65929377131927	1.55585418521334	5.99343226183121
Arrdc2	3.79181000041329	3.75573398506003	3.72236489266274	4.09127139196886	3.18366366060567	3.37605651181483	3.81895606048613	5.70973583153544	3.42015101769912	4.81929771893469	4.54250697652083	2.9087622931432	4.0572622220886
Arrdc3	4.52690992121459	6.36110863467057	5.44894529576276	4.93313895204892	4.86453413702428	5.80603337938545	6.25014839735711	4.87570803322249	4.5274768432331	6.71925172185717	4.5711760424356	2.00313163717673	5.9923994501685
Arrdc4	4.00927517068794	4.32390358088058	3.31380964087692	6.02025957141282	3.61171408465185	2.94652874380588	4.91970641998076	2.63843045136391	4.55008968216767	5.07581477999673	3.7707314746567	2.47119783794281	4.34597662619412
Arrdc5	0	0	0.0872677982240638	0	0.357976233764241	0	0.0249557051280136	0.763888952477964	0.504432275175202	0.0936506278872013	0.116979190313702	7.77095399127596	0.343707199156279
Arsa	5.13755974444748	4.32937873065589	4.66062182889103	4.20841729598483	3.37423785235334	3.20159191795248	4.55047493539029	2.22270285220665	4.45557841150558	5.48641109771733	4.33180701597488	6.85869473690102	4.0336237668499
Arsb	5.45398295239139	5.61364626995691	6.43714602251479	4.75203579250451	3.13242575261635	3.81510775214096	4.29956259706958	2.19645042581886	5.41653803675937	4.56813674120513	4.66648368760204	2.97346261497663	5.71009803542567
Arsg	2.62309922696641	3.15159377495879	4.63251000040919	2.67499531870787	1.28972362187624	3.41448612019312	2.26051598264442	1.01158254436986	2.4989216830099	2.73048919018456	2.8499305077043	1.95572161904306	2.53008731796712
Arsi	3.71583518871616	1.73497381393003	0.800259052095541	1.66587372442681	1.6410551057422	0.0602435006390578	0.977387820935721	1.76945010257257	0.677039246754616	4.62190364100761	1.74837415368174	0.0722249423295588	2.36457967596
Arsj	0.512111809406211	0.237124500101736	2.01412069859411	1.01927691957874	0.693547714276937	0	1.00568300837071	0.210422323266894	0.151452507610805	0.516174964947618	0.0317906943825325	0.0654132867770323	0.201506773022628
Arsk	3.94654152888419	4.39999252992468	3.92193536378268	3.55633805493551	3.12401031385611	2.88219780301675	4.19116357182011	2.85523885676862	3.11872925367658	4.09075712962276	3.99373193604875	4.23135366553612	4.26444060882902
Art1	0.162218447083633	0.165636390887788	0.0842398498567888	0.0753612946490055	7.93178761975661	0	1.15648221912402	8.83259650058262	0.274018182051021	6.31528471113917	0.130649666083263	3.34613146788236	5.69858449620402
Art2a-ps	0	0	0	0	0	0	0	0	0	0	0	0	0
Art2b	0.77875859626818	0.875334581093135	0.770883015615876	0.741150515855236	0.628664479517793	0.687849549172127	0.84852707713935	0.381293399826019	0.524047481899965	0.501967123692879	4.067537919195	0.52118592898721	0.799709587049132
Art3	8.8374215698828	4.26439781100604	3.08566030356642	5.41203388431785	9.28799598613709	2.26966145889653	5.43314774327971	8.17738978781203	2.12906530905045	6.81492971293148	2.65168898055931	8.3645824784418	6.47771668894119
Art4	0.470965787593635	3.78092537909964	0.0804003251000428	1.12153120453137	4.25670204409998	1.60472797287775	4.87110105067394	0.171990219850053	0.742154567163707	4.41911729496199	3.52084491044636	1.10983308517443	2.01055070541962
Art5	0.377128274665572	0.216670773843251	0	0.655804039676584	4.04599270019754	0	0.565838939304664	4.59121095717379	0.204218022087036	2.9937739502992	0.513440971603694	5.83639604055578	2.3384258384353
Artn	0.238460730826899	0.289615610857156	0.65072174628392	1.98055357809825	0.11130111481976	0	1.36560361305827	0.176175081159879	0.392244907800408	0.704934458430764	0.713528642324391	2.62176391684057	4.02418121508853
Arv1	3.28655554408932	3.73012307972193	4.28337010368949	2.94959436183597	2.83846067425868	1.80648910212066	3.45604768190348	2.38368235841574	3.63850186273498	3.66634152860975	4.41064861208447	3.2902362734893	3.32623899510515
Arvcf	3.17341103804907	4.56294379548486	4.27909231641646	2.89891506095868	2.98371677212219	2.41640729398998	4.05585610705122	2.90115202689475	3.83884583680602	5.11307331432135	4.16731069153738	2.05719008141424	3.37096754728446
Arx	1.82218001776829	0.9332880766061	3.94820078633777	0.27263102498006	0	0	0.00718633823757743	0.197116927508021	0.0130397564224994	0.151593200252327	0.0349632075017147	1.1549074826278	0.108850075050296
Arxes1	5.48877671304492	2.68694133192778	5.85736498372049	1.28441603975529	0.152078453902429	0	1.66862129247106	0.316982694971229	4.71078863115771	1.37527957205371	1.05710745073337	0.750754710729413	2.93355595142686
Arxes2	7.36224336363865	5.20045309781081	7.00650297253454	2.29559267838672	1.39054862846659	0.154325561032875	5.14686478193977	1.25784015433968	6.70086992930339	3.02171119099417	2.22457924540646	3.86830788570302	5.06518032416897
As3mt	4.36142987462348	6.72994126454964	4.15524456190697	5.79711377520676	6.26644712025061	5.43953486720558	5.04117503936764	5.23668185186078	5.43796383081581	3.84616090557967	4.87376373926655	4.32338684936875	6.60239970419472
Asah1	7.40016492115191	7.69035997312408	6.71863527645314	7.71036097440994	6.10089223007442	5.53168476548626	7.98047405759536	4.67024276264996	6.20734246882998	7.04407507120526	7.10073142712414	4.94896236050165	7.60921047760498
Asah2	4.39840185478954	4.71595608807581	3.65420569733263	3.99970878222774	3.21313792191086	3.02265272537236	3.83642043006565	2.53932855482375	3.98056851875833	4.87833363013346	2.89165102855425	1.91022354422383	4.9017229094711
Asap1	4.65367227012628	4.11240126963987	5.97098503013327	3.81497660131341	3.33819248352097	2.26749954227715	4.16207650337974	2.41044892259401	4.30134154147502	4.63864140594103	5.18624257757819	6.38148574065554	4.74824470303707
Asap2	4.12996444368008	3.94563231585471	5.04439361000093	4.69605508790972	3.28534642629013	2.34075622068248	4.51774117535363	2.0310797000801	2.92044491961909	4.06615122716505	2.87414054028404	0.978550759105247	3.22317365626525
Asap3	3.44909705149334	1.82755292948899	1.98190993253659	1.98252398135192	3.02115155058087	2.36168565222791	2.98008711031214	1.7326218757124	2.1564722431357	4.01001691525256	1.52695827600562	2.89459485054558	3.81975591558432
Asb1	3.30808721001949	3.41782121972276	4.76070906443058	2.2348320026019	2.95035881632311	1.63094654495339	3.49733677626646	2.74855868865408	3.69750423762932	2.73545986392922	4.1046670841831	5.05308501388653	2.66739302570658
Asb10	0.404420388241352	0.107632762019116	0.281345827765683	0.135255531241793	5.84979523462114	0.0221090402260474	0.257073781344361	6.34927295374591	0.121341849025408	3.55188650425218	0.0421867440818701	0.470327121957588	3.06210289195434
Asb11	0.103042048700401	0.63356082802961	2.42560008364145	2.58535183840181	7.61959101784409	0	0.928888986526193	7.66551488650639	0.161371557119125	4.94690520075626	0.114303544586392	0.676274847313322	4.32885127562995
Asb12	2.76176007963229	0.0733973875578832	0.107741982763408	0	4.20146894412819	0	0.0734410657904326	6.07210040749418	0.0073182768966996	3.97376583703784	0	4.25794749914176	3.4070611787296
Asb13	4.47127105936072	5.09802984088807	6.11379403618059	4.90322686034253	4.23205795853606	5.2192310127915	5.19234458201533	4.56127783694352	4.81974554033314	5.19790001181772	5.42483984602301	2.50177201147423	5.29032726829728
Asb14	0.832948730827787	1.36994819029586	1.1849452017917	0.99185767522696	6.92268226220425	0.335698258996968	2.67165473963861	7.49821153866446	1.30482943090438	4.54577473661094	1.01702740310298	2.69135352953461	3.99468121352711
Asb15	0.111652609838674	0.0786158396472885	0.336184343261124	0.0568035533267262	5.13108943982369	0.06106116009445	0.328302426422076	5.55343081591717	0.186029917961221	2.40296154725565	0.184483054982409	4.20016268935608	2.19058815183295
Asb16	0	0.300271257016663	0.885967559774089	0.689165460190019	0.152225660868456	0	0.0268341105543385	5.98226335977214	0.13392270153793	3.35493418501164	0.0853057095200424	0.110834490368578	2.66406779467773
Asb17	0	0	0.352771351022541	0	0	0	0.047292290910146	0.191719220380861	0.0696785576570305	0.605478944297548	1.06329719553341	8.99558733025411	1.41136058683874
Asb18	0	0	0.646017157253241	0	2.67912877740124	0	0.0144219700918651	3.79476549393188	0	1.37865877248339	0	0.204800614238664	0.998370069482667
Asb2	1.28288422432975	1.1244225067381	1.51264675612855	4.82592212597365	7.98624072576199	1.04384496324604	2.12020036617287	8.99725060624348	0.469185905041024	5.43932808931271	6.09080665764971	1.90035133771271	5.36468351012902
Asb3	3.51128660304831	4.07554835730289	4.27219630202171	3.40647529000839	3.27949984587552	2.30809119076324	3.57628376440892	2.84580311901914	3.78983775448867	3.5126811673971	4.01639657859241	3.87190963618653	3.7755138200228
Asb4	0.7623423081839	1.92482171596321	0.783038213831145	1.06350706074715	2.23959028043286	0.328558061072476	0.547514808128346	3.57895221065258	6.19853075228521	1.45567072040015	0.542644016670645	5.26683376043785	1.65657250236969
Asb5	0.296856427431319	0.880244156755011	1.07093201197635	0.801630287875292	5.39676286023414	0.091210503800006	0.475235221997132	8.3053547739908	1.34947427774084	6.0113498694158	0.296729353020707	2.81612604670005	5.15951574641234
Asb6	4.37305583611642	4.84109154514972	5.01783852564571	4.04995363272385	3.06921629248111	2.42838880527736	4.23035869364336	3.04124577776385	3.78048273224128	4.47124139452202	4.93655603175577	2.78692181524017	4.49677559462735
Asb7	2.44654772923844	2.81963611471137	3.24393187587899	2.83158734104186	1.72337621887584	1.17252685388094	2.35150354851506	1.85490005772018	2.69282082055935	2.51691532340295	2.01841258592032	1.28947744302004	2.90506023236036
Asb8	4.91369217410533	5.1566773165262	5.7066498875619	5.09466798207261	6.16027674368331	3.84634199339928	4.57040835595455	6.55542085027062	4.3218039919804	5.30881141923467	4.66777742911708	6.34832666051442	5.32452679703258
Asb9	0	0.119689607801558	0	0	0	0	0	0	0.271385406573226	0	0	6.76068597689948	2.69165796945822
Ascc1	4.8943980998389	5.84355363206191	4.73140545979138	5.1030439633557	4.9370647164432	3.53722636696432	5.31709218177885	4.46203132745845	4.65492028517425	5.10670842841528	4.89564506728117	6.91439573200452	5.58496391651375
Ascc2	4.75473591526728	5.25167257980393	4.6576818051785	5.6781349458825	3.45281702530819	3.87196728756251	5.78365147468087	3.71984303084809	4.23228012900786	4.85780726325743	4.96239950037016	6.49694198712249	4.73789002909877
Ascc3	3.01853108410793	3.9766916976368	3.54052178618395	3.97797766982817	2.48606956197811	2.88073759689073	3.50662236403228	2.65421953874966	3.8485575807048	3.94208600063936	4.06541076987136	4.6362331734907	3.65296903885007
Ascl1	1.64297906301903	1.38336257901817	3.13674372387064	0.572181110993025	0	0	0.738343986615887	0.0407619939331729	6.07432969257753	0.187756909318985	0.0131902275715162	0.0279238461862239	4.84081219184967
Ascl2	0.430542626911749	0.495128321834243	0.517739289910538	2.26607393106243	0.10317121514037	0	0.320099406889582	0.0379496102447351	0.371849874356818	2.94933460982198	0.144271630822506	0.481612639653061	0.319040746318356
Ascl3	0.748094436548385	0.859093951208888	0.505522396743251	0.588564509950046	0.2711838639898	0.198722974449423	0.674556662294375	0.134039940037742	0.133465239500536	0.366460699355395	0.436613030871021	1.20645722136039	0.549710264910286
Ascl4	0.505364816516277	0.803242388184212	1.56532129106929	0.962032461808011	0.515945174814676	0.525531645686113	1.18330646173165	0.316975729335854	1.77135592124989	1.27921436008685	1.14943504547875	1.51207108583376	1.61965470616211
Ascl5	0	0	1.73309002030647	0	0	0	0	0	0	0	0	0	0
Asdurf	0	0	0	0	0	0	0	0	0	0	0	0	0
Asf1a	4.52820235973593	4.67562849228481	4.47353167877606	4.32831956222129	4.78873811577032	3.20592552294983	4.63056182156264	4.34136857423196	3.99634797194942	4.50797624013451	5.20470585650216	4.96023394894019	4.9475240297491
Asf1b	2.58710820124829	2.31637659091807	0.875070557158535	4.0136278451864	1.86448887158865	0.68881004229081	2.40085413100584	0.42640782636876	1.85661679340707	3.21424159232651	5.35816099730605	5.64371387704455	1.55895389247089
Asgr1	0.0995805230074116	0.893872760395707	2.17190826585354	0.408921925443646	0	9.26279641752002	2.92261504255538	0.428326679204162	0.826567257231196	0.460029473531426	0.0905842426591635	1.30913159852988	8.58128578026367
Asgr2	2.83884571508219	2.30675614566146	0.273872029152373	0.744428050512325	1.21921579919715	7.85087350864214	1.16837922002466	0.87105039664983	0.388058430305628	2.68128067226766	1.22262453350052	0.248276803351301	1.5705792895319
Ash1l	3.81827807460039	4.2844957569646	5.5225133419007	4.20584289085453	3.49238742867436	2.41192218611843	4.17970995228133	3.18623048709213	3.84768419911448	4.40601027219564	4.7130189626964	3.58099695060343	4.28463302686835
Ash2l	4.62819094037399	5.85794576132873	5.42767610454715	5.12301144584021	4.47682256202498	3.51678372456005	4.72694341025453	3.97666533172182	4.86722502225214	5.1451812603557	5.30265467350299	7.00082439232766	5.26416112614992
Asic1	1.76294271173704	4.03389021501184	5.21718109121039	1.98619061638082	1.16451269335531	0.729584045737482	1.42101895183497	0.495838553647245	5.14024544047382	1.39763617480248	1.97561393658444	1.28072753641808	2.80019335448335
Asic2	1.50846580902143	2.04416724978088	5.5856612011484	1.09977948053286	0	0.0133349449693513	0.0266367346292029	0.0522453720167964	1.49912619438953	0.289527219169336	0.366350509587722	0.556976531103302	0.386212321519806
Asic3	0.290295385234225	0.582846987021759	0.744849377456606	0.515247943631002	0.250355491121396	0.232085033390782	0.47135547104154	0.901129927046405	0.7474133724064	0.725909167295322	0.317846607286528	1.1614941710443	1.0686626091977
Asic4	0.0538153411593707	3.67146514401401	3.50579306294699	0.71385623231593	0	0	0.0267715048931639	0.0307168314480009	5.13232463666493	0.0641268069728392	0.0773452771927133	0.583860773915216	0.0363605001527012
Asic5	0	0.025207007330536	0.0742255942786534	0.229353893096774	0.020840848846989	2.27831063059741	0.0609882535801504	0	0	0	0	0.0518187409633491	0
Asl	4.77506358963868	6.71041834623507	4.45667609425614	4.89312919999742	2.68413693845656	8.43595721100825	4.32904492440092	3.12281363523808	4.00765399538763	4.12602200021647	4.45148520888387	3.55563166720112	5.34269676309591
Asmt	0.025814199907082	0.0278343521096016	0.0909336703961375	0	0	0	0.0533654164135571	0	0.11873490056661	0.0633420000380727	0.089006185936935	0.323499754732533	0.172256184913991
Asna1	6.55379046097951	6.93545583343248	7.38140222259115	6.41634433975193	6.13999941111418	4.9921514265873	6.13345052278467	5.98256848455386	5.75149013654952	6.2670548243666	6.25125916351151	6.6431436645282	7.38937992111013
Asns	6.15281558150775	5.10572148115667	7.45485914129316	5.77068662656492	2.68769161039795	0.809397076313678	4.63049282092502	1.36920511568469	5.89547445348311	4.65498508578527	4.64699789807252	7.3495144285132	5.48129247772803
Asnsd1	5.85158090925846	5.50109157067454	4.95946576728723	5.66323925271953	6.61668264205679	5.10297124590606	5.26463938436427	6.99020224319176	5.06594574094696	6.11349109174341	6.69241203411591	8.31132536077865	5.93463645684799
Aspa	6.42512917649202	3.25325663705138	5.9180772165302	3.73216237747821	3.19020689218563	4.19058977090449	3.93168458239154	3.67850911436825	2.18012477390022	4.33760436276101	1.96166611627649	3.21423289395766	4.20114614238949
Aspdh	0.145991789089735	1.4675203453421	2.96707323744851	0.20434698833738	0.563639305689675	7.60191715182265	0.25267343358529	0.11484333722434	1.68330721062119	0.0961021038038251	0.0322724822072892	3.11421295111329	0.0571612665411204
Aspg	1.37917220797636	1.11978211891639	1.76605548452554	4.37307664426644	0.490608895829975	6.82701776655743	1.49630182290119	0.454121255575919	0.283469525917809	3.80898841798786	0.0651861437475839	1.16440806166024	1.74129673121181
Asph	6.65117084203268	5.84043975220759	7.03320104140165	6.56510261903913	7.69329518102973	4.17396036291194	5.38069374680946	8.07580953971042	6.18958645459104	6.29384749837318	4.10726645647749	2.75492047548095	6.72231048039493
Asphd1	0.597532064928546	2.83182295655844	6.07796136360501	0.991402982279322	0.677862089779494	0.15361386505018	0.270596197724586	0.0167840540867652	5.02132097649888	0.318929389597172	0.633137918089266	1.68863119852982	1.69818162489527
Asphd2	1.14591269027953	1.86157290253229	6.33886202454853	1.02270613834378	0.65934894141635	0	0.170337177161219	0.377760198643116	3.54587589688295	1.26943405802658	0.0431475980418287	0.387950481041524	0.311451889488639
Aspm	0.515679453759368	0.492090438636826	0.322780108466128	2.03021830800206	0.396688335009148	0.103555657991232	0.548284094227293	0.0480032969611673	0.345847816849861	1.61231126595485	2.82252531283923	2.5187014964337	0.237734154695861
Aspn	6.49038623327702	3.91207031939008	2.28677519132554	7.40940819116758	6.385342752639	0.150925464373246	5.33312579221871	4.96971568460994	2.12279477511612	7.83626913011299	1.46729593956777	2.41121344366994	5.83553335722341
Asprv1	0.378211955941262	0.614589747906612	1.97148972030018	1.10464579193038	0.129913886149422	0.112163051118652	0.876673612105743	0.0798255390844813	1.07708452018087	9.24911281621747	2.64177042481184	0.795052344923403	0.512352290447543
Aspscr1	5.856345818097	6.2467562930734	5.61719839518813	5.84955981782346	4.64500087067112	5.97955566172033	5.62191849903018	4.62641696771675	4.90085979098148	5.78993392723315	5.87009666432799	7.61375542448706	6.02653652401507
Asrgl1	4.39374309741817	4.15728951077024	7.54495420707697	2.93330748852493	5.2545190575558	2.91785503622001	3.42392083038692	5.63014694250344	4.48759046906138	3.66981088461599	4.99825060851386	9.75880712364764	4.53233077028774
Ass1	2.50345246144752	4.75764832805282	5.10431150238983	5.80413318465777	2.34293320348769	11.1496924613189	4.45421859764452	1.92303186290265	6.3480626055854	4.24339528192805	5.30068335935059	5.25886872579808	3.77574878339752
Aste1	2.37473926768087	2.6382009428971	2.32454638448239	2.823192170312	2.41854835609855	0.784977253150676	2.27132463232012	0.969288014387164	1.977425892362	2.31604184020546	2.39922490407296	4.24803034741192	2.65588061679274
Astl	0	0	0	0	0	0	0	0	0	0	0.105179899831326	0.0120298844830931	0.205457692284643
Astn1	0.0977221792803091	3.12377780818423	6.72505913080815	1.37342432389022	0.595841141765005	0.0193719522785438	0.048875013429907	0.0520892922651388	2.02053532784103	0.101314145100548	0.114306133372732	0.288970753807589	0.0777062731007033
Astn2	1.20874624552913	1.69432119977064	4.28891865657718	1.13262369821656	0.91854916575375	0.612273327775755	2.80917794606591	0.836694663234175	1.11243048631167	0.753881028913394	2.42592489314883	0.936735365019635	1.71207358656711
Asxl1	3.97339914532681	4.35099331754904	4.61643680418843	4.55806331286188	3.45931096191988	2.85932299530793	4.57827327900522	2.67904359707418	3.66659870140685	4.28637827508565	4.92657340410634	5.7403794078914	4.35260457071244
Asxl2	3.17122466407327	3.8878816013237	4.06432675125079	3.92191248296005	2.84051770292467	2.5078018247926	3.68134465389118	2.31531498339974	3.25576205635427	3.80203971291533	4.56651134406083	4.18260390320409	3.74721964914965
Asxl3	0.258584814949625	0.179958467380724	2.27751381241955	0.618155898036245	0.357978270648411	0.00650995673181379	0.169557212438889	0.0888493457637472	0.259067372159068	0.128730682025604	0.220842557760881	0.505662688985364	0.0916265125863488
Asz1	0	0	0	0.0652105805215024	0	0.0625474851018087	0.239690401953143	0	0	0	0	5.44720587522052	0.029503482113607
Atad1	6.15035816950831	6.96616906365011	7.36413562192335	6.88264255340378	6.8923465342768	5.64624071420267	6.34669490985138	6.27930940464834	6.20884881016026	6.31015667709133	6.27207697098559	7.20661753569831	6.69495775750647
Atad2	2.6833895147948	3.30659660964836	3.0826325487852	3.71397592982189	2.14289029767513	1.52116296115222	3.3138419747355	1.07817253208266	2.52493986326228	3.69880673670556	5.24660064301819	4.99902328065222	2.28281521840711
Atad2b	2.94101876085322	3.3886112065353	3.65877720435655	3.51196950919225	2.61131592678607	2.31840577704996	3.35120057361672	2.64773502304452	2.70820458691381	3.90227517392007	4.45096656863702	2.83838414391567	3.16735718095886
Atad3a	5.47162130640368	5.88643719925343	5.29135532613509	5.25371328386998	4.94095528351372	4.98605453565729	3.98973223391753	4.48384032550626	4.24410222957266	5.01227421381059	5.20982852483224	3.40127541303692	4.88178886320607
Atad5	1.24418624780127	1.75132805671896	2.0422803989618	2.24836511066412	0.96795583047281	0.621307672297869	1.36244833119841	0.584193547278612	1.64916938117556	2.16521336940897	3.40478137877267	2.13579518691163	1.42305274057436
Atat1	4.73544675952305	5.49821095571131	5.98477613501592	4.93461942584409	2.98458082185004	4.59469690651071	4.70802910481283	2.24045889794114	5.38929769121737	4.77641457570169	4.44785118806053	6.45813113161153	5.78688412344535
Atcay	0.0268018843725222	2.27290751440834	7.17952798038267	1.22971535990497	1.42270862932814	0	0.0751099184691518	3.30516157125343	4.48592226163172	1.50880129303559	1.08179892168101	1.57297043332471	1.18357987156466
Ate1	4.72906575835856	5.12589329722721	5.91905602808491	4.34509730162868	4.48359362756068	3.43488323378498	4.7425306028505	4.5916965143491	4.98406098896505	4.64525580932831	4.6990485963582	4.76702009077078	4.88396612585424
Atf1	5.40664238361088	6.00183292834161	4.1756325983554	5.40292483298068	5.66762055462875	4.43272175087054	5.18695343091734	5.69101846097512	4.77034863427284	5.58597091939099	5.75592322811406	6.88735241665816	5.77028211260352
Atf2	5.26377691448905	5.6791349968228	6.73766826502924	5.36931542461041	4.6012221012292	4.11414441507014	5.17206346142878	3.93705418961314	5.46562193569972	5.15510722077727	5.35991348204579	6.0377232289244	5.64322047669708
Atf3	3.45772148608165	2.40661185204786	1.00922768855146	4.70972780960552	3.12644258062966	0.927962867651749	3.48306213004706	1.70991539188253	0.785858895011043	3.95804384327614	1.99979726896384	0.313124396540361	2.03568812406762
Atf4	7.54924035958758	8.39072214189771	8.04723934014568	8.03002529399613	7.11812871855751	6.65713047786686	7.71938639196	7.90401053343042	7.49616188959119	7.9991645550031	8.04244025105024	5.76396327911101	7.94221062126437
Atf5	2.21392759017483	2.45805654351977	2.28640164087244	2.5653828685179	2.30230000217225	2.18333746742982	2.55012703717335	2.55022618194333	2.27619975573493	2.23745575247601	2.45906448913088	3.87416091380927	2.30774499070563
Atf6	4.14495780116347	4.52919009970174	4.99425750075856	4.5815632315489	4.75955681017792	4.06482872332255	4.49818456236896	3.37783133617162	4.15608325858028	4.39301231593282	4.49576438850263	2.97531971510948	4.67993079662789
Atf6b	5.1331685268762	5.42794372209494	5.78850530822839	5.18524780217213	3.70152072042323	3.60584216453584	5.01688818995031	2.85429381814938	4.85276896437194	5.24927744759588	5.75313437332423	4.11363547774109	5.65549589488225
Atf7	4.57126986308795	4.2345976094858	4.51075653214314	4.37341392612244	3.73367714765341	2.78272219668614	5.03724257203789	4.31259956910582	3.75909301607684	5.40664426782316	4.87638902101877	3.41097499340964	5.28523154176576
Atf7ip	3.76297258976698	3.67428082326095	4.92004396541533	4.166779594457	3.77812605812001	2.41532253625591	4.37770587963341	2.6374623528113	3.95937435127993	4.87769184162445	5.4962564393311	4.70004194641306	4.1469135173714
Atf7ip2	0.0625585851656957	0.701412099590982	0	0.97773289106104	0	0	0.0571837096361598	0	1.03837340822964	0.0196062232180109	0.370097962531234	6.8077115304419	0
Atg10	4.72423127765948	4.78745727366974	4.61255324098552	3.67326451767794	5.62569152678926	3.12628219262706	4.00672904798941	3.82133971491404	4.39661871557954	4.16133734008066	3.72780126687248	2.30218965665811	5.06350810865225
Atg101	4.70552070705927	5.39853760406841	5.64807448957196	5.28937014313794	4.59625957346885	5.07737278120453	4.90298587664866	5.18888481154066	4.04412746435746	5.15974949982753	4.86284524959745	3.18610172048436	5.13430843211701
Atg12	5.88727535547221	5.75151885106082	6.50868575067915	5.93958239476243	5.09387169205578	4.44434043231579	5.48638360484359	5.14132726152935	4.54604288056373	5.47788647178283	5.26529296216565	5.62748621560775	5.25400690741406
Atg13	4.89878539088308	5.90763536412944	6.1024402493338	5.20796917535449	4.68677296927556	4.63926905679017	4.95059081551265	4.38697950998476	4.98972423386727	5.36635323554924	4.68224160366306	4.99813649777664	5.7183758632649
Atg14	3.39078430883512	4.18690344511279	4.34062331803214	3.97301760114712	3.15567993308723	3.29843623315985	3.91630521277472	2.94438480881463	3.42442776489128	4.09535376794647	3.42209738103931	2.87741157287979	4.27739612993301
Atg16l1	4.91533467441597	4.79159276572371	5.85867303269279	4.38572722476619	4.58108705712514	3.94221162605387	4.7384446373053	3.98063450004628	4.23214274406866	4.74874917468497	5.01742882239406	2.81969913967177	4.65236785718301
Atg16l2	2.49770918699649	3.81767481697521	3.61863030387238	3.35797802924575	2.71111777449169	2.43921541482934	3.5180932946418	2.18728599919021	3.86059533318355	3.16445504496012	5.03376209308276	0.913542632636248	3.55515152186148
Atg2a	4.12472184234364	4.27495004741971	4.27874740792134	4.21038612558884	2.88914740627697	3.30002475661973	3.52216462742981	3.19351444911387	3.69102936612403	3.98577190139824	4.33850163209798	4.45911040419758	3.9097833092183
Atg2b	2.95636249269221	3.285207670803	4.12133977872427	3.20002188675993	2.43489246566284	2.63771799695863	3.09232455711421	2.65502080581529	3.48014554536993	3.53513460950661	3.70564902563054	4.04086708876744	3.2502050658056
Atg3	6.16546932941862	6.15389094623791	6.0249616293523	5.69952096657265	4.99805976488646	6.22962113946148	5.98018396571862	4.87448447756473	5.24712340900336	6.15344585265299	5.94001001966843	5.16657826845525	5.88575689944171
Atg4a	4.64888912819799	5.0204407250679	3.87975638265726	5.24792387534561	4.80527481160383	3.6420697852131	4.80973205782456	5.18214683801312	3.68067715748537	4.48466989325827	5.17513792084769	2.25627426262613	4.99730315691177
Atg4b	4.89254134689296	5.78523276009817	5.8050069636075	5.08515666078346	4.3241448265095	3.75072892989628	5.12961267165603	3.98703510697252	4.76792405809851	5.06008787965296	5.20974723965702	4.31574629226614	5.2677932104468
Atg4c	4.2779998644586	4.75940145496185	5.89269669620103	4.34871869661946	2.99577339578031	3.57627218803949	3.90321463426822	3.38108140924885	3.93946415888899	3.91746819348825	3.93584368072274	5.0583095357201	4.25365285280942
Atg4d	3.90633383011785	4.30770383271476	4.5368887369091	5.56397419176694	4.88361489302975	3.5592846494444	4.0482250798256	4.85805356044394	3.90489761474276	4.78124506314564	4.81355799013604	4.04765749301304	4.38324342780704
Atg5	5.18862896011887	5.92780228848434	5.32318337131329	5.67611106681726	4.80490801506599	5.49667402738258	5.24253169479052	4.10741635381567	4.59899306971359	5.36763469917447	5.3381761683652	2.93227660807861	5.5232281704643
Atg7	5.02292023734364	4.26581946816212	4.19557439826106	3.91220244596119	3.0525201013699	3.90287973854063	4.11607591025113	2.57744639199934	2.95417282318914	4.15093391108721	3.81912083222837	4.98545798225998	4.88899267764502
Atg9a	4.83436491279765	4.76628200229755	6.28812476828446	5.32108105538948	4.72689967504258	4.42221457702393	4.52149947947421	6.57794434088003	4.31362196923387	5.11454921866447	4.17301197240294	7.44609478615186	4.93433667713523
Atg9b	1.0459292814758	0.365586018403599	1.98769140171993	0.665453238891802	0.66527509796618	0.0946422078846426	0.423488984935399	0.142392169369692	3.71731793284251	5.36447205602209	0.55554253013288	0.987057666395932	0.975994326141359
Atic	5.73456381437293	6.09775767533543	5.04086271198286	5.82327140004004	4.42480142635845	4.03243807737272	4.84772760901933	4.75476546941116	5.42041123649154	5.45394150950542	6.05524556061922	3.49986185995474	5.41951878056391
Atl1	2.34391527019883	3.39819762704978	7.26526318771514	2.72460669357449	2.46338779122115	0.932113998741556	2.12792120301904	1.56328542807724	3.58544506709992	2.30709758173553	2.0049757991401	5.72141148805308	2.74351537868461
Atl2	6.39836874593209	6.5398664587172	6.05022889637679	6.4288809403007	5.38688898228656	5.88911983855483	5.00477487562686	7.84484195877704	4.83898541947836	6.33640164878353	5.03394777401967	5.46905269223608	5.9045535497731
Atl3	6.46326042185176	5.99331213699736	4.74986524958444	5.41615503060213	3.5820471699457	5.07119291536924	5.77325141775854	2.91683891741368	4.61581042321037	6.3353834701061	5.39686948427258	7.384390504134	5.49059755574741
Atm	2.31289841997388	2.65395811060928	3.41304266402408	3.00387882643761	1.88992849046571	1.37588780139098	2.50400903528073	1.74662283230635	2.95346739150046	2.90494971508092	3.97080223499577	2.18046510722075	2.82632664560812
Atmin	3.48372713819304	3.84326433246794	5.47847517207023	3.82847916530525	3.2818653612156	1.73700394119612	3.72955115475692	3.96324547024392	3.76269496490817	4.19567205825773	4.0402767102156	5.07209683575248	4.30157990464547
Atn1	5.50184782070996	5.30053431486559	6.19238357452352	5.22999082031419	2.68413590563538	2.60695265097279	4.59912967217787	3.91985770607222	5.21796431892947	5.01639745093488	4.22202030854225	2.90643521939723	5.62800989824611
Atoh1	0.246056050782562	0.011910227323853	0	6.49213343996255	0	0	0	0.0156672293263462	0	0.0214590289918048	0	0	0.0154412984056329
Atoh7	0.125998292306057	0.106147633720314	2.0273447919436	0.0830999572956553	0.129910621834528	0	0.0160747512557725	0.686441475172296	0.963018609951288	0.168056807482987	0	0.0574845286294991	0.151390798955937
Atoh8	3.36223703535598	1.88330097287378	1.50419912265132	2.1720954730578	2.58662051409398	3.92557393159988	3.69860865459989	1.83803855810703	0.389333207658793	1.8941202105162	2.48293199487087	6.61471362767119	2.22381407595988
Atox1	8.54342706702561	8.90690289296311	7.38763381215356	7.51001058712939	7.60454539600947	7.7292611268135	7.90649879131142	6.18166779918969	6.19478194500102	8.59575929361062	8.19835256517426	6.3057210315914	8.7775723459497
Atp10a	3.25648886695315	5.63887731359123	3.02582675482245	2.42136175256879	1.19998373854389	0.229349668585464	3.20563757927448	1.32670223681321	2.15427794465484	3.25623897051255	2.31379077254665	5.14735198322334	3.2468443490254
Atp10b	0.141866423425802	0.201548889029759	1.50677360036926	6.05855490247734	0.0892127317338091	0.0337838792964558	0.425819794565972	0.027651048048181	0.481403514131729	2.96839405129502	0.474618689264366	0.736332540745371	2.50708707937536
Atp10d	0	0	0	0	0	0	0	0	0	0	0	0	0
Atp11a	4.47995226665359	5.43082808196924	4.14099359500689	4.46822838192025	4.12855459631513	1.19066719928583	6.63823348668944	3.67540914561011	4.63140524509601	4.62689723979466	3.24282820818679	4.16252297124888	6.78780699901364
Atp11b	4.78859845422487	4.97072131654903	3.71933196564293	6.89550557948716	4.30359761853566	4.14038018346368	5.00288925207447	3.55175081646891	5.02054848940579	5.32641588037675	6.04702907551618	5.45132490869611	5.6868928377958
Atp11c	4.12544526641966	3.9710102745229	4.1547875371787	4.06302961918262	3.22517945221622	6.09230168771995	4.56474295078282	1.99956564336453	2.95425200372927	3.9861630782629	4.76561713247892	3.20621094766115	3.91539256253189
Atp12a	0.112544020340416	0.0147814245219113	0.0821120963764601	2.52279034113517	0	0	0.0271764704044151	0	0.227839148626077	2.44568760939811	0.0172709893208078	0.697185258987294	0.0309397935609138
Atp13a1	4.62660982681312	5.11108216806291	5.10531809313596	5.30545976906687	3.56931842882178	3.99558262456215	4.6779960004001	3.27761880537396	4.51253616303935	5.21846881738515	5.76952526757838	3.63709966957815	4.95156389037056
Atp13a2	4.75296646257903	4.61278346600493	6.25791013119469	3.76285613321226	3.02739993059044	2.70207987022233	5.13753144115312	3.97944902464951	4.41457840285361	5.41416032991233	5.81076970595461	3.63946225555994	4.40074373501731
Atp13a3	5.08695836304369	4.77988258319444	5.43789630954412	6.08953453321514	3.88739493927766	5.30299291097693	6.30623696514385	4.00241788422474	3.78512153473124	4.80711832313474	5.36481042453508	3.86300087174412	4.85777887551164
Atp13a4	0	0.047387767078517	3.88952112519111	0.301546273104342	0.0306605994101204	0.0147779439482645	2.18091925762977	0	0.107966138001139	0.818926655307796	0	1.82666030522818	0.143483638347622
Atp13a5	0	0	3.29630658881755	0	0	0.00870031644487478	0.120887936012316	1.26245367008508	0.03181319724813	1.03548400026553	0	0.167121059297069	1.19898044384813
Atp1a1	6.17516435628563	8.99788884828957	9.10840216406697	9.99154602019724	8.55340857301365	6.91329737748111	7.8737218229892	5.26848495387746	7.85802592931556	7.2719195197544	7.02449345983223	5.64509805130111	10.5945434149946
Atp1a2	8.28385759430772	4.67880302868286	8.97555436008732	3.5567361809417	7.63796575581734	0.369315470309238	5.2182239758623	8.80803161783838	3.93325485769431	7.30416651381547	1.76947699476025	4.09945968889614	6.73714573907261
Atp1a3	3.33964368337548	5.89003478803398	9.83488035187013	0.937229639619793	0.195628932509689	0.0758199962531045	1.21399078696137	0.196575610444089	2.23935352375982	1.65600417272681	3.31513551410341	0.621921517389677	0.539267615283615
Atp1a4	0.695272092484558	2.0689188815429	0.121086032263085	0.0737474304401505	0.062793037798194	0.0360306815998676	0.0451641072237218	0.779188363429501	0.0109757625672078	0.124875946539794	0.045464335629701	8.67864079197003	0.197914037567604
Atp1b1	4.43801803507696	6.56171007866661	10.7955643305274	10.1034161533915	7.65912940105377	5.32047895204796	8.07154677561954	5.18125833756406	7.7910511232606	6.91247312510757	4.97575958973956	4.81283774019736	10.4109029015431
Atp1b2	4.15170071128924	5.77264340803348	8.68460326802421	3.23929028926815	3.76872460186968	0.406262266538071	2.99253259144931	8.39645198619155	5.29130385390124	5.31224996432567	4.12192637940439	4.99354442420402	5.3119180805594
Atp1b3	7.61196391023964	8.25688478864128	7.47845905171609	6.80426167037519	6.36300975581187	5.27749042960385	7.72690828481821	5.52791747887117	5.96772654510612	8.79983473355983	7.84089476225708	9.15693825168328	8.03055196293538
Atp1b4	0	0.0205531548180449	0	0	0.0406117743691248	0	0.0113483905387156	2.56560501765439	0	0.91571438831099	0	0.0425275420215248	0.673585183905047
Atp23	3.28973947132021	3.74812022513006	3.9688668678928	3.13716159612774	3.16138133296615	3.18474524707866	2.9829934004477	2.21282799421506	2.70699024652321	3.43329218195807	3.67294935363312	3.88076994980087	3.28775395707037
Atp2a1	0.50377546743245	1.26184317657665	1.40147985944518	0.315650859617043	0.4308548128955	0.211520309763443	1.27683114694415	14.2263859825292	2.18201464909353	11.3703149890179	2.10483441431248	0.820403075062956	10.5258408915029
Atp2a2	5.67041301203263	5.38738083644918	2.63900804223641	6.77805635514062	11.5129278287624	5.58740504964045	5.94644309943262	3.78329938699426	4.6016348364232	6.12339463338224	5.22543537902103	6.1935904398283	6.5329394449209
Atp2a3	4.42304628650301	3.51711150197158	2.03356726340567	8.90867378704879	2.5482081976043	0.583446481277691	6.56764303420419	1.77341818424215	1.82557733185328	3.51750217219331	7.56666049421127	1.27527892439261	4.26106359058111
Atp2b1	4.79576401538626	4.54689707373756	8.43011307135588	6.43021261126441	4.45831304764073	3.34128587239657	5.88821057505475	4.50540813641547	5.3031645652192	5.56517281067763	5.22521401295811	2.93635261013558	4.9820163962632
Atp2b2	0.284355830357369	2.04596911118679	7.10968840265614	0.518763799009689	0.074180733496862	0.820293587224868	1.84360059407129	0.0997456506908436	3.44409544148721	0.238868506004884	0.243734930220592	0.941049819727742	0.803795028294091
Atp2b3	0.0544495375720056	5.45478207039295	6.2915210585244	0.933785507138039	0.0979190165783562	0.0311015565978069	0.101185049750609	2.88563182019865	0.535484556843077	0.506669645544643	0.0705773691935911	1.40740901562083	1.51692112499176
Atp2b4	6.01647334028773	3.95337990370009	6.75022627195396	6.02068171424819	2.76400434095542	1.36876178948767	3.62850649628249	2.47585582412601	4.53420824767671	6.07826972481506	4.32091122830023	5.08165630249129	4.07539717155659
Atp2c1	5.03438536647476	5.51239943550806	7.13307278257034	5.80128364491726	4.90412249227512	4.25698284613125	5.97718695873769	4.12696347854341	5.39372566714647	5.62973471052096	5.54867871450149	4.55148039589222	5.77215507523857
Atp2c2	0.0386545941761429	0.0906097510725988	0.919437349090277	5.59967231176958	0.00734507784729527	0	2.65981181593722	0.00747770783801778	0.118685687250931	3.88890910105226	0.0701734972403416	1.13843887644842	0.711022156740514
Atp4a	0.00610866560421785	1.34156341518283	0.645145603639199	0.230372713387291	0	0.392803358000076	0.0172423729156592	0	0.156285827064594	0.403644193167821	0.285623746832504	0.774293642577298	0.337184494984664
Atp4b	0.714591965302732	0.0958742391896709	0	0.0223733551445849	0	0	0	0	0.0428951060158409	0.0535513577349973	0.0858559289254666	0.0282419924108457	0.130021066413366
Atp5a1	9.52865527940064	9.65361413971836	9.75514231894076	10.122143814633	11.6807000318808	9.20768554318105	8.26105293703666	10.4164265891762	8.33880423602961	9.20844922618713	8.67323391213736	7.5405164572834	9.83346084414316
Atp5b	10.8486125162757	10.5126522150048	10.5443706309469	10.8332874823778	12.2006661383304	9.97585551947882	9.0309883961597	11.2968331512576	8.58290013975115	9.95975523696094	9.38534306291071	9.04642582649568	10.5047430039389
Atp5c1	9.61357292115508	9.34475339300325	9.16143053126382	9.61471778195821	11.3520213721714	8.81605509676891	8.16984850791604	10.1916667379564	7.5457932080418	9.11095441295932	8.41650944846936	7.62215987826593	9.34718510543738
Atp5d	8.58447379401262	8.57544604140492	8.7596154646555	9.23479502653259	9.78547412466378	8.13635431529602	7.48133459261207	9.08292745471391	7.14705430820434	8.44328194048281	7.81787066394221	7.07308585549067	8.98784992161998
Atp5e	9.69368463871063	9.82498674383378	9.22212607711597	9.80786469742389	11.3513464761156	8.92243666256551	8.95672377694763	10.8510509599666	8.96139832015288	9.68025829460034	9.2016692102556	8.37273713117278	10.0148465682093
Atp5f1	8.38508419506729	8.39644551344467	8.69220293865337	8.76231047869688	10.4549325528685	8.32184958405517	7.49344878132075	9.30230186461274	6.96192893688083	8.10343117644535	7.71018743614763	6.85578573848954	8.43407143983245
Atp5g1	6.88433068862531	7.94956460500983	8.49592735167557	8.65902481501055	11.1571156165738	7.59404115679179	6.54136940046057	9.65650903582542	7.71817739022712	7.95276147672163	6.99659978065882	6.4192526989663	8.2652534907289
Atp5g2	7.63027475211702	8.02788277407575	7.28136312612314	8.04875673634455	8.75600647840666	6.77617427797979	7.0662463248284	8.26585499096468	6.74678496576838	7.41036850067698	7.13565879315306	4.86731637170941	7.95143016302892
Atp5g3	10.0015416649559	9.85387266195336	9.61123877008129	10.1497645412618	11.7877408284703	9.30170139471049	8.18975034460777	10.2907455815284	7.95982873825577	9.25795153872241	8.39151571138897	6.74458951833466	9.83681245422641
Atp5h	9.83832417743987	10.1882236627757	10.2463754757739	10.2904046455589	12.2824405293079	9.42850036062557	9.43223025097573	10.1756479129329	8.71336396412898	9.68974111702677	9.36200167717114	8.76024267521038	10.1512572197132
Atp5j	9.37906150609316	9.73520782244826	9.62572542706503	9.78551177987989	11.7385408927569	9.17561658605359	8.71363615976471	10.3515749440978	8.15933347261797	9.32143395491122	8.38433563362782	8.84720973901791	9.72674431540495
Atp5j2	9.77719787461319	9.84010734439509	9.69165050588688	10.3034301538037	12.1198149396972	9.34950083846796	8.90449988980732	10.443994294827	8.3448468662893	9.48702743351801	8.84357588280511	7.88164939838533	9.90137246251185
Atp5k	9.23050654798201	8.52972327343363	9.28780804151967	9.30490572671298	10.8941152442555	8.29804704416103	7.8758195778067	9.87105349313354	7.04673498228231	8.75040939670985	7.70930171779304	7.27953601810447	8.85578048737992
Atp5l	8.63297214440947	8.36495812492641	8.12717188153594	8.75331306646387	9.57923977799952	7.37881248177356	8.05718141075918	8.0662816797779	7.29518760318515	8.44116617068643	8.06199780716802	5.90528585644211	8.44933866879082
Atp5mpl	9.35130574640521	9.62928456661626	9.92680340618007	10.5817030039981	11.9611104253009	9.19488820207784	8.68148569526053	10.6650890895047	8.32106398366159	9.3960890967364	9.08604072346822	9.15643769069376	10.0501457293598
Atp5o	9.37221914607765	8.97935229642007	9.47028629058614	9.75447088047562	11.7976318260666	8.55471665422975	8.13966625744025	10.3790544883888	7.22647753823175	9.14518719124006	8.13063262256408	8.26684414578453	9.57052957595474
Atp5s	4.60529280276899	5.07186286271707	5.56177962276159	4.51061396841224	5.61895923695436	3.07190135062036	4.25825650200979	4.81144726821324	4.67687878014842	4.59818148925224	4.06903134401535	5.98364653266968	4.86635493703236
Atp6ap1	7.53503910197917	8.16826851684622	8.81696070316963	7.12100219821438	7.07102273761353	5.87025167808317	7.62908278447243	6.92127100306544	7.41110416505273	7.63082392996929	7.41566208305845	4.16166388606271	8.21531235028958
Atp6ap1l	0	0.0278097798858554	4.59798707835874	0	0.256206364296244	0	0	0.0362377248373005	1.76506649236249	0.442088632520723	0	6.39034323078286	0.123784526885515
Atp6ap2	6.2629207836797	6.88818660791821	8.67817234563308	7.88588285630124	4.91936700736131	5.14700759420679	6.59612851776748	4.23704207036671	7.00463902886963	6.52052801663424	6.08000145087817	3.86393105223266	7.24354827514396
Atp6v0a1	6.34786364228299	6.11082375274121	8.26543385531563	5.51511525217883	4.94068932915429	4.10912212020576	5.75737744961469	5.69051958742336	5.8918862523568	5.60620246722742	5.40997072163207	4.29512995804436	5.82656180323053
Atp6v0a2	4.81107903376669	5.45109110542563	5.42010022605754	6.26980750226683	4.48247303407766	3.38721320777394	4.69921201319817	4.09568992621085	4.6223684831993	5.15465052372543	5.19747622439853	3.863026648156	5.35442361084799
Atp6v0a4	1.42323609088452	0.111352225252254	0.360892502352786	0.824781124497331	0.483545262783928	0.122540388411536	2.27512805080357	0.351417318975992	0.307820383785805	4.71823000958187	0.654406351880159	0.543700568847142	4.01346225381185
Atp6v0b	7.76903478753023	8.30130494162737	9.0409298799237	7.8273081643313	7.40294350191959	6.45979937068112	7.82680172640443	6.88793670447117	8.04609824998478	8.07406477377162	7.86532252798403	7.25596214891776	8.57473579618901
Atp6v0c	8.63954023101914	9.35990313187781	10.9013988133499	8.48119986916349	8.10444119608561	7.40874165714299	8.44634233131778	7.79063633432724	8.49735187721765	8.48462493655805	8.06105056900441	7.00436007191493	9.20921310237851
Atp6v0d1	7.49496214142702	7.15643641480519	8.43483920465519	7.14468783805823	5.6124253538864	5.95345817685873	6.74523581746475	5.36274319523848	6.78906169506218	7.09368061717221	6.66686847607006	5.25746357314194	7.61074690157651
Atp6v0d2	2.00489573473765	1.1637384683563	0.224658647793664	0.528730563058306	0.269113248631506	3.16188702650625	5.81749576371086	0.160847334066114	0.2244789700876	1.7177088526697	0.599398773476089	0.660970943915323	5.71556890894474
Atp6v0e	8.39333782593491	8.44220267954731	6.37497449439609	7.65258577863769	6.89810528142423	6.12019398967721	7.90075549924625	5.29510486514824	6.84783344139061	8.03243827321881	7.93383459110004	5.8112731369786	8.50193598513275
Atp6v0e2	6.02018664070323	7.31450451658704	8.89642666630235	4.85548289185989	3.47401537771749	0.561243755256957	4.51543429682789	5.75342236081597	6.95688524135904	4.81284915592547	1.22502941521956	3.76447359096836	5.23706165413616
Atp6v1a	6.01776796708814	6.72723499378416	8.83199041734909	5.62959245220978	4.1041794911208	4.41980221138897	6.23975574148938	3.74262816459202	4.96088368457428	6.03347901013235	5.24376492570604	5.8016875080954	7.0434391635574
Atp6v1b1	0	0	0.165650141812048	0	0	0	2.24867575898158	0.011158784165281	0.0333225666699416	2.72566697615205	0	3.69172254502186	0.102799441903022
Atp6v1b2	6.87225098002678	7.4352578345336	9.55731826443255	6.33226076516688	6.11926418597107	4.83590515813544	6.74037055913089	5.69456422393734	7.24424690192275	6.71914018750214	6.38829433568215	4.89426466087371	6.88050216520435
Atp6v1c1	6.1177229348897	6.83239423656947	8.64775388317488	5.75028886682588	5.86151960545572	4.86723617889831	5.8849332957645	4.99122226611245	6.16382349256055	5.90827153555746	5.94227711103873	6.37268777444741	7.58689919563427
Atp6v1c2	1.50835398160001	1.19531540895185	2.26258498818409	0.167268274383208	0.107331923075368	0.10045919257317	6.67468504386419	0.064180422034303	3.55558427764774	6.80509447106174	0.214427297473583	1.23808513357758	2.57352771436953
Atp6v1d	6.68740656562791	7.46870255141036	9.18863030948968	6.6188242185654	7.54186147198907	5.52143414350928	6.78247190663305	6.88849341615922	6.9654064681129	7.29530131006646	6.89617921600005	7.49492932108877	7.42187113716758
Atp6v1e1	8.20603886710064	8.76038559668491	9.66096300897378	7.54250892313864	7.67871359108468	6.79444933915061	7.58995522984993	7.26600029115442	6.82481641947403	7.84857880753513	6.99060944374701	5.47072947792967	8.13194852915369
Atp6v1e2	0	0	0.13328150864636	0	0.154054916529358	0	0	0	0	0	0	7.83252373369444	0
Atp6v1f	7.58048573337576	8.46090753756405	8.49581839388764	7.37654750238966	7.3983376261293	6.26934811731692	7.70319823558246	6.96981342149059	7.44976794379481	7.68238397985909	7.86509308355236	7.58393679620048	8.25489304874345
Atp6v1fnb	0.13743246577809	0.203139455858561	0.364529739608129	0	0.0568149916820367	0	0.219721679026483	0.0673019699622487	0.0853488002907988	0	0.121332856325663	5.61716054155098	0.119872092843501
Atp6v1g1	7.48704392004529	8.33072776765992	7.91682968992857	7.7209268152139	7.76689937283565	6.547428531299	8.11272093612674	8.49081590095941	8.15280660261083	7.85853109858811	7.28347669850027	7.59480690449935	8.15028626276293
Atp6v1g2	2.84502181996708	4.12288965142438	9.33787913218174	3.36059694853217	2.18067443541618	1.66021869030477	3.24141998863294	1.82844188230948	2.92164776396189	2.39480750006772	3.77473305742573	3.39747285314346	4.45788173133385
Atp6v1g3	0.455029138817899	0.244580861432648	0.340026878927451	0.200701655829519	0.0614853857166651	0.156541858886127	0.459231314755647	0.195918517840988	0.344975917368796	0.387321577481016	0.344238129636755	0.432230602218263	0.373575340236793
Atp6v1h	6.91145999847157	8.24456043171528	8.1051404044344	6.14462298194944	5.20397670781822	5.72302572113654	6.1354431390434	4.2714049760314	6.52428863959538	6.30707142826458	5.7351174834046	6.03322017834503	6.96364968147897
Atp7a	3.04341012604169	4.49402874560805	2.9112949187089	3.81916184401877	1.98276914797259	1.37326528722378	4.17392572877955	2.05897905965054	3.15471965993422	3.94582671782962	3.23364875606053	2.28580986722545	3.64037984959177
Atp7b	0.10223410293457	0.204003032733531	1.22747133717609	0.198157607209594	0	2.74609386303137	4.37169470168295	0.0341065664893685	0.841325076882326	0.088488075402455	1.93722300850939	1.89067133411393	0.138841547626837
Atp8a1	2.6567187048755	3.70433375385759	6.72886499027903	4.69140293422131	3.76839698998366	1.25962809330646	6.63306155844224	5.1630991204396	4.92156333528149	4.04565341474398	5.30430718666253	1.81289347801572	3.9605653326704
Atp8a2	0.243211385558845	0.568114463864094	4.14923051886029	3.29801640646587	1.32912234892589	0.0405759968358242	0.450273566222184	1.29242016422086	1.25628267681856	1.39580215196308	0.781189538933224	5.11835685198917	0.797392611976024
Atp8b1	2.70776311355345	0.584523062617901	1.81719745436453	7.22981798930565	2.20034818756367	3.35439467920853	3.18049620937707	0.913080340964042	0.584187117854999	3.84518752512495	1.63126395316969	1.01183368940983	4.13894511191968
Atp8b2	4.24219764815166	4.30629072521673	5.52431702177675	3.16072426799493	3.12807488454284	0.839780613248473	3.94496524148097	2.09667672020838	5.21030789584111	5.21114620055101	4.92554868342235	3.93810772854406	4.40721865765624
Atp8b3	0.0287661124347198	0.344684746324827	0.209498506597196	0.0609655327775974	0.0132889248400064	0	0.0396378906617208	0	0.00500739535648539	0.0160035360227424	0.0406850286425227	9.85330713507517	0.0416781599615732
Atp8b4	1.716614092427	1.36979274712708	0.615772142550452	0.591825152666827	0.768165210965036	0.4644930328587	2.26532199696129	0.227653730853028	0.325067625357529	1.86564970966859	3.54407394959366	1.04985030795242	0.814033197168408
Atp8b5	0.429471947113189	0.749363570761504	0.51724815064715	1.07692279542001	0.156162942202337	0.288367567285885	0.501355082681629	0.150761745206455	1.34604801897513	0.895279365954802	0.321324621322214	4.82876738581935	0.492672908234302
Atp9a	6.74993283719095	5.52694446732054	7.70060314396643	6.8308502801837	4.77288552665997	4.19467878120192	5.0776564667265	3.67651574360345	5.73674965556748	5.82000827603499	2.89316253357509	5.31332240448479	6.16331436981605
Atp9b	4.52968080460275	4.79170042905867	5.25011599968881	4.30202892833831	3.41936107318458	3.33872684564597	4.59963962409292	3.11307179504347	4.20614629723693	4.61158943671899	4.83541652453821	5.87243739797758	4.68588465401959
Atpaf1	3.65534701097935	4.83901589181346	5.14749875684171	3.86385437110126	5.35568285718107	2.52529528936378	3.39692260503353	4.9751367574145	3.11656106252068	3.8427056669597	3.51009343695557	3.12443427096234	4.08459795847658
Atpaf2	6.15474928327272	5.34620662607337	4.64057260160634	4.80179435405168	5.03866115462951	4.1191118675193	3.95791168559093	4.85902096646956	3.9268799455913	4.47078233467979	4.46329085529421	5.29019852663778	5.16039534271115
Atpif1	5.70898340808296	7.12266654751867	7.78743995059894	7.77746358266889	7.4789799864604	3.8430348839507	6.22700537218	4.46731787948209	6.57851446278276	6.83528522090685	6.9488704881209	7.11544250748396	7.08670069327899
Atr	2.80154012649503	3.4222679509665	3.3188044757154	2.87489808516278	2.65646665292834	1.85742280674968	3.10269450030819	1.63441598890928	2.84529722458384	3.09055157323275	4.07579249882457	6.49560772213957	3.0750362688619
Atraid	8.08543575988345	8.10162731279504	7.39957833149667	7.11396694558844	6.8960963699599	6.98171495551624	7.30273839948734	6.38541744605925	7.52181698978874	7.13188060370851	6.53821625959896	5.04844877429114	7.8803248520231
Atrip	3.10726391884198	3.73083237709606	3.8341917608135	2.54845706267017	2.0795591515661	1.69256297030718	2.8425056058796	1.96955160710168	2.91182201912665	3.00413631207137	3.51865199680212	2.77673968506011	3.04118198324239
Atrn	4.21242789265489	4.28484313066016	6.37600163423323	3.81070876578326	3.22712029230424	3.88066936097174	4.15246353595673	2.90261543862369	3.66767946235786	4.26493350515462	3.69078054948386	2.70671166451526	4.17268679098861
Atrnl1	4.31164726196342	3.96248088169966	5.77005109618462	5.33439627613226	3.12729444541847	2.88422448065493	4.6970488731914	2.15553914040974	2.57206677818949	4.91751719231866	3.79151460933853	2.67250918818925	4.47825535811528
Atrx	4.53850453781532	5.47112973220533	6.45033222753495	4.83644088777646	4.26898467176708	3.38971275141992	5.38675393515297	3.58458055478757	4.88854058311075	5.17233543390584	5.81272374342012	2.41593109466298	5.15861889212081
Atxn1	3.23285432482388	3.20034400964189	4.57018738609172	3.49558637318579	2.86984718807706	2.5096909084291	3.44562695097129	4.0915108553108	2.33999449591777	3.39836022295316	2.82569597525059	1.40386890167827	3.66157772470887
Atxn10	7.48361405625229	7.23146785725148	8.09166962346621	5.08481399288919	5.99123274907278	5.11932501621059	6.90968100442302	4.83402213170934	6.75625173775729	6.25275916452692	5.8159145074475	7.26154930702781	7.17827295705002
Atxn1l	3.75675930329821	3.62505913752343	4.1112692011725	3.73900327044762	2.20755716269429	2.24369218128827	4.03684030123714	2.64959521671263	3.61656364095729	3.83814976186568	3.74539742013151	4.78524973134036	3.83405623305892
Atxn2	4.86866149872311	5.27349913221544	5.76084767006552	4.72123371123263	4.49944687090491	4.23311759344931	4.51610418667376	4.35482641814962	4.16831270820865	4.50906379768918	4.08324326916961	5.63820079553157	4.74678057278465
Atxn2l	6.02538297217228	6.63683177393725	6.93741436901212	6.41776167651083	4.8527788135649	4.82417509524036	6.27119999530789	4.85600842034587	6.23502153883053	6.3728321210686	7.132463615404	8.72464773878795	6.88054477694567
Atxn3	4.10600655002345	4.11150276039631	4.6947455785936	4.48554318723474	3.16896842684475	3.11878049443282	4.48992792783254	2.34330575807923	3.25707761791435	4.90411796237856	4.82044218666513	8.70620700019795	3.99232563873333
Atxn7	3.65462759401437	3.92028974455484	4.54386614759946	4.24315545705069	3.44540695526062	3.09679997637504	4.64784708791836	3.38362285087505	3.96879659713201	4.66205301105034	4.8037248036905	3.58231813055127	4.08786934326185
Atxn7l1	5.17752645344874	4.40500082400136	5.23645251847356	4.44620166172594	4.02482652751513	3.05815060765783	5.1410979373529	4.12160778973911	3.67735369379479	4.64078915598421	4.92289148298588	6.27202780865931	4.76725546766776
Atxn7l2	2.30225016903429	3.52575601111266	4.7387389784926	2.45228565768852	1.72581275214941	1.03428801961489	2.47601835954499	3.01684286404782	3.37314426898337	2.77033263697576	3.43135195675228	2.99278816161834	3.13338985286738
Atxn7l3	4.96058633610283	5.17754344716704	7.25893588088379	5.25091654998805	3.29429803284629	3.31303244706986	4.64710695903699	3.20290837349931	4.68879250672087	5.21492752009386	5.46443439452259	4.03055943814142	5.04837355036863
Atxn7l3b	5.8998257749402	6.10100723538551	7.31872233582843	6.23636968411135	4.58057785626557	5.44201796012837	5.99419165185901	3.76422770561303	5.82610466414528	6.04845478253558	5.93649981930525	7.76389168671287	6.21973210824549
Auh	6.67527743017813	6.99990386250154	6.65105881147068	4.84969130880799	6.76980382342572	5.12040126123606	4.96122583771226	5.87686305025855	5.42937845366176	5.29171586459897	4.79852215640647	2.9311839657488	5.38960136049576
Aunip	0.683522798487267	1.71107071220935	0.787565663671842	2.28974731507755	0.484564146488178	0.109100687622377	0.622884856222538	0.104998231926133	0.231578889383066	1.27725559206303	3.08599430582595	3.21718408402226	0.341534251182044
Aup1	6.54996489734187	7.14844140530995	6.26721124473846	7.13762555247726	5.74328047076027	6.7297372459173	6.63791482596341	6.00244905671616	5.3626711874218	6.53355851087249	7.14814055251473	6.23562720937431	6.92417246315665
Aurka	2.31705797561961	2.71373547634993	1.74232576658116	4.3195508613566	1.5310081873845	1.68613289303727	1.96388155244918	3.62349061197949	1.56011732857673	3.01790544928515	4.7807065800448	7.19782650664612	2.18087208104611
Aurkaip1	6.70108113935687	7.17459955454509	6.6224804772107	6.4112651156752	6.83919118104712	5.78492170400668	6.09320098928945	6.12287854678713	5.45815248633037	6.09921937433658	6.26968668367167	5.99615167093815	6.54313164363047
Aurkb	2.53192303371566	1.94470718993123	0.431869653661509	4.23649523874838	1.08540769204105	0.454407895644092	1.72663424979729	0.218359415514603	0.885319111522361	3.00142329470445	4.95848553212029	3.31747944986766	1.00443268052052
Aurkc	0	0	0.116185850023715	0	0	0	0.0337329764317877	0	0	0	0.0457497376218715	4.65537215793518	0
Auts2	2.4739402688386	2.73987321307918	4.63834281412215	4.26894369852183	2.32595835361891	0.213552004360743	1.39232509366624	2.52780219651503	3.84995978095686	3.30191955997601	0.619683246507578	2.11943020980709	1.55912845073478
Aven	4.09033549687489	3.8976614902297	3.52423399902714	4.5758041634349	3.926753620064	3.62320824443867	3.64984149049867	4.31377539148903	3.21667930452142	4.38777074043198	4.24010280394417	8.08039707091829	4.35032888333032
Avil	0.509285411711822	0.904030232366075	0.627836992014028	3.31082177898068	0.681648373099051	0.16419409574924	1.0104556372007	3.60000770773497	0.71374275692936	2.66325395643929	0.497542336858367	0.721211934835186	1.65758119351411
Avl9	3.32700174602788	3.94759378566014	5.12272070900241	4.84219071226432	2.20320272254265	2.64870023678894	3.82433138677732	1.50834398479306	3.87854965617114	3.67102146816656	4.31825755233221	3.13219418623019	4.69596344160967
Avp	0	0	1.18395155609155	0	0	0	0	0	2.16145819320715	0.699754724915832	0	0.557938728268166	0
Avpi1	4.3701482464487	6.63321485559044	5.43450805930926	4.04777863643565	4.32507565049871	5.00602523542197	6.08383853068392	4.202705654804	3.56804354589594	6.29213306752181	4.57853430147529	3.81187005011589	5.36324010810102
Avpr1a	1.83590739037337	1.20541764192684	0.311719182896828	1.52889624148143	1.2111428878228	5.0476190153586	1.29636188820213	0.785549695990551	0.0656832169621432	3.96558198264322	1.18535119408061	0.651646009423875	1.40432554559349
Avpr1b	0.00567208407507719	0.112787263804784	0.0543271184742603	0.326651353268477	0	0	0.00686263655298983	0	1.03885013423891	0	0.00629546764065513	0.0395773066716374	0
Avpr2	0.307002844430448	0.301568424112513	0.460562471092284	0.628224586078659	0.0398047111347597	0.114451799926809	0.450488726629522	0.123814048752407	0.101090529599892	0.303466061454001	2.39001035008312	0.0568683933066669	0.282221270925646
Awat1	0	0	0	0	0	0	0.0851375766521709	0	0	6.54978736979853	0	0.0942147135104905	0
Awat2	0.804752560545572	1.52235163341691	1.1057362139745	1.29244389491175	0.561445368552432	1.184880753752	1.11076260928105	0.646100569002742	1.49328713200902	6.4317191585003	0.985153762659327	2.20911844439533	1.3792546760814
Axdnd1	0.0736398131944153	1.68709274317161	0.471628183476514	0.346418203228522	0.0406978207092841	0.0283920560075427	0.641402396328203	0	0.257468380985929	0.239865326147778	0.426883257378361	7.50336693271752	0.0962875673607305
Axin1	4.33017156242781	4.81870545287176	4.11511583906832	4.78736821710181	3.28097133557456	3.09272702070472	4.36159575462633	3.29648129523917	4.16598693656998	4.92454112729987	5.27729244448149	4.44855400942761	4.82203657500568
Axin2	4.60124432622092	4.66541459723751	4.02491135795322	4.24682951798476	1.16499581510471	1.63814806024282	3.5781060669253	1.78278285662337	3.65261486842495	5.10465680191732	2.62678962092604	1.32428070401708	2.41220668342527
Axl	6.39876557036256	5.10871758272672	4.79900684939687	5.07381878479374	5.61527425432693	3.32757081597344	5.87537039568861	4.05896192188455	2.95104260805796	6.42251741976843	6.7495074639715	4.15972903297021	5.16730835565657
Aym1	0	0	1.00449999319967	0	0	0	0	0	0.190357550773153	0	0	5.03405161972587	1.61560605465136
Azgp1	0.238314124942606	0.699084954193347	0	3.17837151156277	0.135925424263491	10.8256812109518	3.13500781888733	0.319399551258069	0	0.192754699626775	0	0.214453255787019	0.047485821357307
Azi2	5.26854506002908	5.95698908507523	6.14716227351994	6.44378263249517	5.57050753917699	4.74456855412975	5.68874157804434	4.75648908888193	5.18226495812839	5.56931466408956	5.87428880713783	6.23249000702967	5.71422444439012
Azin1	5.39904876102714	5.85539143155281	6.89647654744194	7.04160904823703	5.44780119814717	4.95110106125862	6.0520334222726	4.56182482645375	5.07525344136399	5.35341065803604	5.97050338439077	5.62451454587576	6.00613776964638
Azin2	4.31061399857473	5.15161693361311	4.98430854027611	2.28418771231931	0.787083712790389	0.695277198614788	4.34223603276233	1.26472277787027	2.97565081900385	3.05888019036572	1.95648638955805	7.40709073725159	1.95356298507057
B020004C17Rik	0.182497999420377	0.0756652721134334	0.52216835814571	0.118731490221635	0.175633328059251	0.111106859450543	0.556960747990884	0.0813446393793198	0.154136190593394	0.133783074556023	0.115720607489728	0.829559609729529	0.180620955495217
B020004J07Rik	0.045174319172612	0.114445624691069	0.352950314982359	0	0	0	0.25649095633387	0	0.140925161998947	0.14516383889104	0.0853067221989872	0.301672622675697	0.155432876766809
B020031M17Rik	0	0	0	0	0	0	0	0	0	0	1.53421751628941	0.0980004491548628	0
B230118H07Rik	4.80374408780106	4.62710306183063	4.75954725255699	3.34294450009185	6.03808187092628	3.2092038563459	3.78755386164351	5.93966686284218	4.71502119049061	4.20378830587973	2.05069716528243	6.51527608911046	5.17120257311906
B230217C12Rik	1.83515904025551	3.38230891260909	6.90216139104436	1.67356681818573	1.66965587023855	0.405863548485822	2.02822432529817	0.721823752295845	4.51756530911304	1.85737036459773	2.13428109888675	2.31169542000132	2.06650323246586
B230219D22Rik	5.50125791321671	6.13414993904421	6.66082274504653	5.74726106923488	5.18596062454374	4.29679020027608	6.12709040574745	5.05805903251714	5.68937035320186	5.79978554307705	6.04500610783787	3.4650404244856	6.17883203309038
B230307C23Rik	3.29786729009147	4.76814126523167	4.2721921189485	3.91609422924409	2.73526869676337	2.95642240456663	3.65596721686613	2.93221187582185	3.37000958659121	3.89520849343149	4.745415424248	3.45464047078229	3.7417030077041
B230311B06Rik	2.15500186986891	0.244370083927513	2.84759760191819	0.0605150288363373	0.682060375643296	0	0.0619847773512532	2.34963722130788	0.124793590750792	1.32494998285077	0.0948491498360464	2.9426595345775	0.582100919890589
B2m	12.9842264436701	12.0030402388491	8.67392843930038	11.1498036665068	10.8758369614551	12.180467880046	12.2469910689837	8.44943754441135	9.3083817878877	12.3357419780655	12.6548418257544	6.80763712834109	11.2563701428583
B3galnt1	5.16621100372243	5.15130805277888	6.31884935762571	3.703566645338	2.30020119099496	0.784227452704453	3.5572717429527	2.05169663671634	5.73853968638837	4.03715962407034	2.23660476816684	4.25827438094111	3.42798048598549
B3galnt2	3.90218761575816	4.68822436533374	4.50002561584952	4.70730352951429	4.49302197479232	3.74186860256738	4.73001555495599	6.71111422713414	4.06895069055953	5.32220000448613	5.01013695548398	3.95352051562879	4.81043889694586
B3galt1	1.64857886593623	1.60886051829568	5.11121596421356	0.62853070909083	0.699608839351635	3.22732319471688	0.91194825107602	1.33173965816289	1.71601680185801	1.01387143891492	1.18021546690606	0.696476189301372	2.24640643154876
B3galt2	7.43626191718054	3.90924596414282	5.64332048483195	3.44229172654811	3.13349323355672	0.0232226076970969	0.436764289143362	0.909656878809217	2.31316441166792	3.34426332914608	0.496456464304879	0.842386944063052	3.3120303506739
B3galt4	2.57375049588812	2.56313263054718	2.52111636540833	3.28387718681985	1.58500247912538	0.280352764213775	2.25300623618252	1.25848627446693	2.19437853894807	2.72146234863174	3.46973540880918	2.710990243441	2.49314067197589
B3galt5	0.0375904776146938	0.335104624881932	4.74116613652772	8.10516512457325	0.0147553002585411	0.0316845264178944	0.0632000933948077	0.0165155052274028	1.52423302192346	0.310099872752696	0.266390908358307	0.0844878139343581	0.38837437885242
B3galt6	2.57091676413734	3.25313947532554	3.70117623500893	2.59672401676773	1.94239825045829	1.08471465487956	2.28953707152398	1.47248615447147	3.10852760715099	3.09387697012879	2.66344603012535	1.66539936609195	3.09554778466017
B3gat1	0.585871132114943	1.58990070627059	7.50702986439017	0.159379416052479	0.0309842958081153	0	0.109836488665931	0.141345647970739	1.04501991752891	0.257804362911053	0.362417857865565	0.244904757060428	0.218205364367362
B3gat2	1.10694941225241	1.20417145218001	3.88792470625592	1.39049967058064	1.03492051572292	0.517093554157447	1.60666703561849	0.602962660026294	1.04838950414954	1.50292404924131	1.66207293119366	1.63659531537609	2.30159349620523
B3gat3	5.57152684639138	6.14623549697905	7.59627019308178	5.62470513086679	5.13745400994519	4.99118340677473	5.68530537775703	5.18632930719894	5.44510080404809	5.77946806374706	6.14081753313295	3.70638772202261	6.3505823283136
B3glct	4.63444585262688	4.15447584134734	4.02380323204276	3.60626065001949	2.48777774177928	1.0068683616348	2.8550981152488	1.53039242979122	2.80659398615456	3.10627027695968	2.86700536065106	1.37502368605447	3.36688738359979
B3gnt2	4.28653580728099	7.02431584609212	4.93281613092257	6.33200593726583	4.55039480970235	3.8482954617579	5.63545586712872	2.2428650374183	5.04277659644485	5.05041454252186	6.51890712432583	2.39580455417398	5.65038904792474
B3gnt3	4.03436723618479	3.24290826010523	0.904014555892202	7.6911282471546	3.23214501543141	1.52474912305136	4.25488866573848	2.06978585359601	1.2351825045774	2.82802376058073	2.48333806110997	1.4491307421746	2.70809736159284
B3gnt4	0.824688760983257	1.31604573601558	1.56567865917822	0.911546405768696	0.475117294334763	0.132061845773091	2.86309082025126	0.202386220899378	0.7491694133567	0.968545388746726	0.920952937922245	3.61378581914654	0.582343427192209
B3gnt5	0.552170962812915	0.353509850395659	0.865773927992882	4.80876385024181	0.459780041729217	0.190451343772819	2.67724406453467	0.11893134798844	0.0473428826157687	0.518505747049097	6.26509800122264	0.124463464498263	1.54283371326971
B3gnt6	0.118131842992489	0.149710906867296	0.542536238530231	6.65255984796677	0.100284407162745	0.0334413575597479	0.78412116396436	0.018804704372381	0.0852677589610554	0.346589732351995	0.117827182734876	0.110732639120861	0.184247771120718
B3gnt7	1.02951585883549	0.247080166887126	0.994811844589184	6.85731795230956	0.357317444194073	0.0273699999021845	3.14551893767188	0	2.41214155773603	0.970751017117074	1.30716114841441	0.174858387788164	0.944005289699166
B3gnt8	2.9465414036031	2.42009548949159	0.733417926553283	1.59775560107816	2.21165460927989	0.794004784330274	2.11449657719426	0.962627006271654	3.02993357990533	3.57040888924875	4.65422435110943	1.34604621134529	1.84870403754271
B3gnt9	3.99973833991171	2.55008310690582	2.21647457119619	4.0155118750466	2.57238536424813	0.59883421079343	3.94311300271549	1.7990243624113	5.12929404625933	4.22490327149781	2.65551794428585	2.33215812282121	2.33638811346512
B3gntl1	3.3264547634104	3.62010714732974	3.08618064216042	2.9066622086029	2.37937647361745	1.31729844444443	2.85127618041169	1.46188618546368	3.32394024198621	3.49621951825802	3.63597632521371	3.01942050666885	3.11288526704298
B430306N03Rik	1.00849085594899	0.667572093118543	0.334305914358866	0.203696210522174	0.400188344969491	1.29870443488684	0.932120603285047	0.100401132377222	0.127773340031526	0.783791801817105	4.00927977260902	2.84075039948632	0.256554125441614
B4galnt1	3.1454201016165	4.04636964929103	6.75024835364464	7.15852808043726	1.89982311734086	5.73840183819526	5.58535646685589	0.758282378907177	2.88168965039811	4.998613532471	7.95619837108402	4.5863808474511	6.83699551953009
B4galnt2	1.3553715220213	1.95250101366502	2.12408272378305	8.51399628687453	1.13239961009673	0.702634738612891	1.7573478072469	0.644834778014304	1.88728364100887	2.73334891016044	2.63634186509455	2.18169446030541	1.65908539498367
B4galnt3	0.0539995581584208	2.59962403394514	0.80617968806366	3.3665476157569	0.0322254940927051	0.614484690047662	0.0171639425504223	0.427551981438907	3.82882842086065	2.17310815541346	0.161240362305462	3.03678843257749	0.771970183539091
B4galnt4	0.0951813485783387	1.67473800898333	6.09374582364216	1.71081579582972	0.0791074433591172	0.029686422690111	0.288930250751681	0.101321386823208	3.62015084125918	2.33550248644106	1.17500217827156	3.56665031664789	1.95956339204322
B4galt1	5.59249946600096	5.5935321328729	2.42283215345609	5.31465725264929	5.19531645666664	3.63505176425273	5.5570579708174	4.21225516469116	4.38551594119367	5.76359084733579	5.38876059039955	3.64772022297423	5.32709916396213
B4galt2	3.5234294140404	3.92534599662182	6.18825078965943	2.94335107646156	2.49134337935375	0.22475408510688	2.77321330266324	1.79470276107589	3.21260424532009	3.42565458598191	1.71336048858764	4.26935869505454	3.08395996072802
B4galt3	4.17710635659803	4.96304168673524	5.70807745175465	5.37168325725031	3.9929632854087	3.19660671100765	5.2943259154239	3.50006101429025	5.56178901041798	5.02045465175854	5.39407215515039	4.02589339653587	5.93684885457698
B4galt4	4.08064223414178	4.14650455228504	4.75931496572808	6.26650570213752	4.09785519079844	0.933775073273834	5.60410016502829	2.1205712860297	2.9044260263745	3.64541127087947	3.07531393199368	1.34640752127057	5.37377797064366
B4galt5	3.44402354148221	5.52141871872841	4.76189243000926	4.68980094459238	2.18158512311759	3.21328723903864	3.62762956583456	2.6097644806668	4.08706405862293	3.01439490956881	4.88255792416362	2.83339511633811	3.27710258150539
B4galt6	3.67931316037918	3.63126583145202	6.46017439752003	4.68326362413991	3.42633368802145	1.21248001551776	1.92587394903415	1.21639875431323	5.01608265808502	3.13071231419343	2.73496323581748	1.99689141576361	2.50983561131343
B4galt7	4.05635085287743	4.15068226423595	4.89399462867814	4.14756809911596	3.38880653541885	3.02593041157053	4.00694770069379	2.78452910776642	4.06038451663091	4.02033189283394	4.56733386174596	3.96821470813346	4.04833822857966
B4gat1	5.34099270948065	5.44125751836348	6.72998794184017	4.27000422813765	5.23434272820883	3.73566745256452	4.7740086299462	4.65537976162984	4.57940721303471	4.74013126510895	3.69312543864786	2.74423576426119	4.79755837600719
B9d1	3.54340779355159	4.83147977713218	5.5489662609043	3.76262446797722	3.3470266744981	0.84629639537894	4.96287157794886	2.37013427861997	5.31926805078436	3.93947343985789	2.3692073658867	7.6287821986547	5.44100743521065
B9d2	3.65560716187918	4.55980942667073	4.83251215382105	3.1792044852712	3.58323441231557	2.51269586448306	4.02950401332024	3.29237507020113	4.26322717998013	3.81070906829255	5.1956855749765	3.17287320771581	3.98582082435859
BB287469	0	0	0	0	0	0	0.19045970686519	0	0.012834684239975	0	0	1.47997976276857	0
BC003965	4.52869369202899	4.71076237438152	4.94573001328266	4.35771075748109	4.63190810447776	3.62219339131757	3.91500665601318	4.0809251229898	3.6134813449814	4.33259353647957	4.29972220011679	2.75883205004297	4.28198364230223
BC004004	6.18351276324973	5.76046344705463	5.58745773024745	5.38086610212209	6.9617508790132	5.52937849383603	5.37397079309202	5.71153858423763	5.62273973406946	5.5549082933123	5.21798057945613	4.05435718949763	6.18443128176714
BC005537	7.10266975053723	7.62695156382876	7.5947436835007	7.31989672423404	6.86585681816636	6.48644694325233	7.0533442870064	5.7924829539012	6.98305567420353	7.27912565340345	7.62962342742556	7.84349905041244	7.58159910716879
BC005561	1.00497311265972	0.832883328619106	2.61496589677812	0.932202887644895	0.802429994662836	0.623829147790127	1.13947540688616	0.493506626507566	0.414650452765181	1.30250869521169	1.56660842972426	2.83697708074602	0.803947569379532
BC005624	5.90465918181218	6.68704647933136	7.0731024096179	5.84677042771016	5.41683894113396	4.87704853626258	6.26085686367941	5.46709841894361	5.99104359231033	5.96246916842772	6.31528432680428	5.43760263942501	6.53168808781653
BC016579	0.0642221204586888	0.768254610000649	0.909588655828116	5.37858347560513	0.0232003403157069	0.0719204049783848	0.502614308025967	0.0559509503990087	0.520817706792912	4.31063354951174	0.366127573049271	0.222760323905534	0.0969043729867938
BC017158	4.66430606587103	5.24974238302797	4.52937391257105	4.9979822364666	2.61260907339213	3.32142299737854	4.50486600846697	1.89545076535901	5.13697551605952	4.34865647910723	4.50045374282707	2.48567948972933	5.68704924837182
BC024139	1.17907106447114	0.787101446563694	1.47392144532075	1.30504451583961	0.182900099171876	2.65364388383068	0.637134211665366	0.182872599308894	0.44236150058521	0.953533411738727	0.371540328977597	0.896355889009382	0.561547345336673
BC024978	3.84331887020099	3.67232022664128	3.75647284480419	3.26541208822396	2.67684900777571	2.99903575639002	3.09872767242063	2.99644527995337	3.13755451837017	3.1837270833507	3.49190304505426	5.22870584936757	3.80019527448442
BC028528	5.36136725314629	4.84900330101813	4.24074771273842	3.84900572229282	5.66513691043488	2.92142920194151	8.4633990336184	3.15187412041022	3.68296071348346	5.02937117100417	6.35300169266176	3.44198760235834	5.23249121079663
BC030499	1.11411682989118	1.2475102926039	4.14985569016378	1.21218655440452	0.898285074654699	0.80506588002766	1.23616608090856	0.538216089821402	1.56464546152963	1.39063738040564	1.62735953068116	4.01063092157336	1.32932350334146
BC030500	0	0.206755486470482	4.19405579347948	0.150408093085127	0	0	0.156325262975171	0	0.450841464230855	0	0	0	0.485437955136062
BC030867	0.504789498826908	0.394326479071722	0.952108116830181	1.57677690656893	0.44509652431857	0.0872701388788432	0.307147468327293	0.0251958367839656	0.255144602453641	0.933366219882866	2.22220082494421	4.09754623846851	0.164166173699767
BC030870	0.433937044623237	0.817445265877005	1.34458258139992	7.58896713624703	0.308842358220848	0.368193720413405	3.05969725775925	0.33312463278201	0.872900147315163	0.793961054820566	1.12419124694826	1.14318419311909	1.03497592472077
BC031181	7.96192201590987	8.44466298362403	8.35869768030329	7.91587077893008	6.63058051433586	6.90420698126779	7.65009661692688	6.00453348522179	7.18240399247645	7.18474995557811	7.03421075130596	6.07238729009378	7.8801201952322
BC035044	1.58814662362709	0.622548638106685	1.29477804099038	1.00341804069045	0.618924821056469	0.504893370251625	1.52756682259264	0.201824905249617	0.392029236715828	1.02779031871538	5.46373017233224	0.320420750998191	0.603058594432753
BC037034	4.52558605428633	5.34657405296625	5.8494244206987	5.00341910154271	3.08160422364347	3.15971929499842	4.61899568006764	2.3620911829102	4.73684141286709	5.05620124697519	6.15665870815939	5.09655152037441	5.09543639823626
BC037156	0	0	0	0	0	0	0	0	0	0	0	0.422427636913614	0
BC048403	3.39444282079493	3.43062755260836	3.54035694131942	2.75736715408098	1.45492861838317	1.86166091325414	3.11948118167377	1.26098095841516	2.72597102006776	3.22614357305939	3.23864118988041	1.94488279426267	2.93280509260347
BC048507	0.146376587428361	0.164793577496719	0.279865941714162	0.094610238965932	0.250217982391702	0	0.0651529809871948	0	0	0	0	6.63184519636693	0
BC048562	0	0	0	0	0	0	0	0	0	0	0	6.61390391961742	0
BC048644	0	0.0141257838381488	0.224825886831357	0.0885137413685729	0	1.84706355329675	0.0239292909093656	0	0.030025003606478	0	0.0603382970641022	3.89266174948695	0
BC048671	0.0943346002994325	0	0	0	0	0.912158210384073	0	0	0.066335173761758	0.795701252080552	0	8.23167383353376	0
BC048679	0	0.0683202820149559	0	0	0.268832640917864	0	0	2.46407898045483	0.419764372350029	0.469032655275786	0	1.38771311069641	0.772071772355867
BC049352	0.317105003284509	0.338653277421233	0.561754032229896	0.10952857562983	0.222158624580603	0.100676429376899	0.405863305198489	1.6957766318149	0.08478632811692	0.753523109288247	1.15560783072471	0.343404742721511	0.367741050447689
BC049715	0.577071030947549	0.557800006638036	1.5284446288537	1.02364435971432	0.451762807116651	0.332742268664401	1.27132392094458	0.179164238000687	1.01040670107159	1.03074192522538	1.71728409899758	7.77370303855056	0.861367400028465
BC049730	0	0	0	0	0	0	0	0	0.0315156087956009	0	0	6.93427830952094	0
BC049762	1.0803716605067	0.826418095257594	0.452445324475935	0.485800373289658	0.658393887634377	0.590632712658792	0.614700039242965	0.0724716578828203	0.812236929030105	0.430097494641388	0.399155725008173	8.53396249735809	1.34972025894066
BC051019	0.079395869173423	0.0568289497519015	0.455392360820527	0.635680752881547	0.0312624392833758	0	4.25103732423653	0	0.157342760938005	0.547072129882674	0.2240424754626	0.377841770945383	0.0745774808354616
BC051142	1.28509003827083	2.34198531903199	2.73436890755738	2.00479313050471	0.164129795316638	0.0820376561560009	1.81675237869913	0.191649347270746	4.67951571137124	0.745690027194497	3.54834161745453	10.1857169624195	2.11831015856113
BC051665	0	0	0	0	0	0	0	0	0	0	0	0	0
BC052040	2.33330862802138	2.66800201946319	3.42740867298973	3.06324794631186	1.71150980484973	1.78677579662461	1.92097786853438	2.98591530626428	2.89669466015536	2.76958994759382	3.12860872097039	2.26512661026784	3.00567008617136
BC053393	1.06497272207071	1.00900743211919	1.60534621464668	0.702387828295035	1.6385380313501	0.512199293322353	0.931352706406164	0.649168697657452	0.976700692569738	1.0154501138975	1.345714459771	1.56900207767197	1.12462258631527
BC055324	1.06276439321781	1.6122724817356	1.33574660351722	2.08716038107188	0.814495150597601	0.37428435300205	1.22521059165013	0.222777737382798	1.27156098983203	1.90596412936272	3.06533790421064	3.69092014434873	1.1946323884143
BC061212	0	0	0	0	0	0	0	0	0	0	0	0.494822019773823	0
BC061237	0	0	0	0	0	0	0	0	0	0	0	7.46511098520618	0
BC080695	0	0	0	0	0	0	0	0	0	0	0	0	0
BC100530	0	0	0	0	0	0	0.112100688929192	0	0	2.9329977665534	0	2.41311049592618	0
BC107364	0.526531952871517	1.16164585801513	1.0739084260214	1.57699423117506	0.805172653308773	0.322966703326483	0.825729431937885	2.64090993720541	0.815163149737112	2.06927836384952	1.12457259228875	3.59563994015536	2.10246530997811
BC117090	0	0	0	0	0	0	0	0	0	0	0	0	0
BC147527	1.97283336059432	1.62075985507547	0.941536973472885	0.943317508164114	0.996826433664093	0.486640557546805	1.96166029213066	0.451413347057862	1.00951002360007	2.97079094759006	5.36127505642891	0.821479174639757	1.58852687344572
Baalc	0.211516773676329	2.58869029853653	7.33981186310701	0.159999850378726	0.606782502299364	0.0274407727121305	0.321374359569451	0.0717687744617756	1.92896292698035	0.43593365981249	0.0384437545265884	0.304219161340992	0.314853489733774
Baat	0.101513892676818	0.306112910419331	0.550756703470622	2.12604495201017	0.105184376189867	8.05754407146412	0.0563805644857672	0.408670898852134	0.0962218051664988	0.142972081619208	0.135741358133327	0.0674372868516619	0.0932456669521036
Babam1	6.05003172230838	6.77132907798561	6.60413871329062	6.16448107457374	5.95861726230946	5.51372842497178	5.95741621713522	6.10712589205522	5.50390497616286	6.11626356482477	6.23395142418541	5.52481331220782	6.32119297437884
Babam2	6.70895760255284	7.59006222729437	6.35989303871808	6.12381450711547	5.73304686279631	5.0526814867564	5.88143857753268	5.27781697290285	5.57693092711695	5.67235624864938	5.93379885170222	6.04665807235617	6.58297076962998
Bace1	4.52270151133275	4.91305469013582	6.16407118425193	4.57230074398633	4.22296343229703	3.63315928209067	4.4015375902094	4.48123343576032	4.38283183423769	4.52211168532176	3.7834653617925	2.33920215697033	5.21310147977369
Bace2	2.14235685685612	3.08427695764744	1.23698532926763	5.02066045709861	1.86105765226264	1.11693540488263	2.45150664397044	0.807845769693257	1.45829358828207	2.80931226067428	2.27719719434128	0.340860027672718	4.46721692212093
[truncated: 18,870 more rows]

## Sheet: Testis-specific genes
Genes	Fraction of normalized expression from testis
1110017D15Rik	0.358130461
[truncated: 1,589 more rows]

## Sheet: Exp. breadth, all genes
Gene.id	Exp.breadth
[truncated: 20,787 more rows]

[truncated: 1 more sheets: Exp. breadth, gonia genes]
