# Supplementary material for: DAZL mediates a broad translational program regulating expansion and differentiation of spermatogonial progenitors
Source: eLife journal article supplement (doi:10.7554/elife.56523), 2020-07-20
Supplement: supp [file elife-56523-supp-v1.zip › elife_poa_e56523_Figure_3_source_data_3.xlsx]

## Sheet: Description
Figure 3 - source data 3
Tab Name	Description
Mouse genes' orthology status	Mouse genes expressed in undifferentiated spermatogonia with their yeast orthology and DAZL target status
Mouse-yeast orthologs	Mouse-yeast ortholog data downloaded from Ensembl 98, filtered for mouse genes that are expressed in undifferentiated spermatogonia

## Sheet: Mouse genes' orthology status
gene.id	orthology	DAZL_status
0610009B22Rik	wo.orthology	nontarget
0610010B08Rik	wo.orthology	nontarget
0610010F05Rik	wo.orthology	nontarget
0610010K14Rik	wo.orthology	nontarget
0610030E20Rik	wo.orthology	nontarget
0610037L13Rik	wo.orthology	nontarget
1110004F10Rik	wo.orthology	DAZL.target
1110008L16Rik	wo.orthology	nontarget
1110008P14Rik	wo.orthology	nontarget
1110012L19Rik	wo.orthology	nontarget
1110032A03Rik	wo.orthology	nontarget
1110032F04Rik	wo.orthology	nontarget
1110038F14Rik	wo.orthology	DAZL.target
1110051M20Rik	wo.orthology	nontarget
1110059E24Rik	wo.orthology	nontarget
1110059G10Rik	wo.orthology	nontarget
1110065P20Rik	wo.orthology	DAZL.target
1190002N15Rik	wo.orthology	DAZL.target
1190007I07Rik	wo.orthology	nontarget
1300017J02Rik	wo.orthology	nontarget
1500009L16Rik	wo.orthology	nontarget
1600002K03Rik	wo.orthology	nontarget
1600012H06Rik	wo.orthology	nontarget
1600014C10Rik	wo.orthology	nontarget
1700001C19Rik	wo.orthology	nontarget
1700001J03Rik	wo.orthology	nontarget
1700001L19Rik	wo.orthology	nontarget
1700003E16Rik	wo.orthology	nontarget
1700007K13Rik	wo.orthology	nontarget
1700008O03Rik	wo.orthology	nontarget
1700010D01Rik	wo.orthology	nontarget
1700010I14Rik	wo.orthology	nontarget
1700012B07Rik	wo.orthology	nontarget
1700013F07Rik	wo.orthology	nontarget
1700013H16Rik	wo.orthology	nontarget
1700015F17Rik	wo.orthology	nontarget
1700016D06Rik	wo.orthology	nontarget
1700016K19Rik	wo.orthology	nontarget
1700017B05Rik	wo.orthology	nontarget
1700018B08Rik	wo.orthology	nontarget
1700019A02Rik	wo.orthology	nontarget
1700020A23Rik	wo.orthology	nontarget
1700020D05Rik	wo.orthology	nontarget
1700021F05Rik	wo.orthology	nontarget
1700021F07Rik	wo.orthology	nontarget
1700024G13Rik	wo.orthology	nontarget
1700025G04Rik	wo.orthology	nontarget
1700028K03Rik	wo.orthology	nontarget
1700029H14Rik	wo.orthology	nontarget
1700029J07Rik	wo.orthology	nontarget
1700029P11Rik	wo.orthology	nontarget
1700030J22Rik	wo.orthology	nontarget
1700030K09Rik	wo.orthology	DAZL.target
1700034J05Rik	wo.orthology	nontarget
1700037C18Rik	wo.orthology	nontarget
1700037H04Rik	wo.orthology	nontarget
1700047I17Rik2	wo.orthology	nontarget
1700049E17Rik1	wo.orthology	nontarget
1700049E17Rik2	wo.orthology	nontarget
1700056E22Rik	wo.orthology	nontarget
1700065D16Rik	wo.orthology	nontarget
1700066C05Rik	wo.orthology	nontarget
1700066M21Rik	wo.orthology	DAZL.target
1700067K01Rik	wo.orthology	nontarget
1700080O16Rik	wo.orthology	nontarget
1700094D03Rik	wo.orthology	nontarget
1700102P08Rik	wo.orthology	nontarget
1700109H08Rik	wo.orthology	nontarget
1700123O20Rik	wo.orthology	nontarget
1700125H20Rik	wo.orthology	nontarget
1810009A15Rik	wo.orthology	nontarget
1810010H24Rik	wo.orthology	nontarget
1810013L24Rik	wo.orthology	DAZL.target
1810022K09Rik	wo.orthology	nontarget
1810024B03Rik	w.orthology	nontarget
1810030O07Rik	wo.orthology	nontarget
1810037I17Rik	wo.orthology	nontarget
1810043G02Rik	wo.orthology	nontarget
1810055G02Rik	wo.orthology	nontarget
2010003K11Rik	wo.orthology	nontarget
2010005H15Rik	wo.orthology	nontarget
2010109A12Rik	wo.orthology	nontarget
2010109I03Rik	wo.orthology	nontarget
2010111I01Rik	wo.orthology	nontarget
2010300C02Rik	wo.orthology	DAZL.target
2010315B03Rik	wo.orthology	nontarget
2200002D01Rik	wo.orthology	nontarget
2210010C04Rik	wo.orthology	nontarget
2210011C24Rik	wo.orthology	nontarget
2210016F16Rik	wo.orthology	nontarget
2210016L21Rik	wo.orthology	nontarget
2210408I21Rik	wo.orthology	nontarget
2210418O10Rik	wo.orthology	nontarget
2300009A05Rik	wo.orthology	nontarget
2310009A05Rik	wo.orthology	nontarget
2310009B15Rik	wo.orthology	nontarget
2310011J03Rik	wo.orthology	nontarget
2310022A10Rik	wo.orthology	nontarget
2310022B05Rik	wo.orthology	nontarget
2310030G06Rik	wo.orthology	nontarget
2310033P09Rik	wo.orthology	nontarget
2310039H08Rik	wo.orthology	nontarget
2310057M21Rik	wo.orthology	DAZL.target
2310061I04Rik	wo.orthology	nontarget
2410002F23Rik	wo.orthology	nontarget
2410004B18Rik	wo.orthology	nontarget
2410004P03Rik	wo.orthology	nontarget
2410015M20Rik	wo.orthology	nontarget
2410131K14Rik	wo.orthology	nontarget
2410141K09Rik	wo.orthology	nontarget
2510002D24Rik	wo.orthology	nontarget
2510009E07Rik	wo.orthology	nontarget
2510039O18Rik	wo.orthology	DAZL.target
2610001J05Rik	wo.orthology	DAZL.target
2610002M06Rik	w.orthology	nontarget
2610008E11Rik	wo.orthology	nontarget
2610042L04Rik	wo.orthology	nontarget
2610044O15Rik8	wo.orthology	nontarget
2610301B20Rik	wo.orthology	DAZL.target
2610318N02Rik	wo.orthology	nontarget
2610507B11Rik	w.orthology	nontarget
2610524H06Rik	wo.orthology	nontarget
2700049A03Rik	wo.orthology	nontarget
2700062C07Rik	wo.orthology	nontarget
2700081O15Rik	wo.orthology	nontarget
2700097O09Rik	w.orthology	nontarget
2810004N23Rik	wo.orthology	nontarget
2810006K23Rik	wo.orthology	nontarget
2810021J22Rik	wo.orthology	nontarget
2810408A11Rik	wo.orthology	nontarget
2810459M11Rik	wo.orthology	nontarget
2900026A02Rik	wo.orthology	nontarget
3110009E18Rik	w.orthology	nontarget
3110040N11Rik	wo.orthology	nontarget
3110082I17Rik	wo.orthology	nontarget
3110082J24Rik	wo.orthology	nontarget
3300002I08Rik	wo.orthology	nontarget
3830403N18Rik	wo.orthology	nontarget
3830406C13Rik	wo.orthology	nontarget
3830417A13Rik	wo.orthology	nontarget
4833420G17Rik	wo.orthology	DAZL.target
4833427G06Rik	wo.orthology	nontarget
4833439L19Rik	wo.orthology	DAZL.target
4921507P07Rik	wo.orthology	nontarget
4921524J17Rik	wo.orthology	nontarget
4921536K21Rik	wo.orthology	nontarget
4930402H24Rik	wo.orthology	nontarget
4930430F08Rik	wo.orthology	nontarget
4930432K21Rik	wo.orthology	nontarget
4930433I11Rik	wo.orthology	nontarget
4930444P10Rik	wo.orthology	nontarget
4930447C04Rik	wo.orthology	nontarget
4930452B06Rik	wo.orthology	DAZL.target
4930453N24Rik	wo.orthology	nontarget
4930467E23Rik	wo.orthology	nontarget
4930502E18Rik	w.orthology	nontarget
4930503B20Rik	w.orthology	nontarget
4930503E14Rik	wo.orthology	nontarget
4930503L19Rik	wo.orthology	nontarget
4930504O13Rik	wo.orthology	nontarget
4930505A04Rik	wo.orthology	nontarget
4930512M02Rik	wo.orthology	nontarget
4930519L02Rik	wo.orthology	nontarget
4930539E08Rik	wo.orthology	nontarget
4930550C14Rik	wo.orthology	nontarget
4930550L24Rik	wo.orthology	DAZL.target
4930558K02Rik	wo.orthology	nontarget
4930563E22Rik	wo.orthology	nontarget
4930564C03Rik	wo.orthology	nontarget
4930579G24Rik	wo.orthology	DAZL.target
4930591A17Rik	wo.orthology	nontarget
4931406B18Rik	wo.orthology	nontarget
4931406C07Rik	wo.orthology	nontarget
4931406P16Rik	wo.orthology	DAZL.target
4931414P19Rik	wo.orthology	nontarget
4931422A03Rik	wo.orthology	nontarget
4931428F04Rik	wo.orthology	DAZL.target
4932438A13Rik	wo.orthology	DAZL.target
4933402E13Rik	wo.orthology	nontarget
4933402J07Rik	wo.orthology	nontarget
4933403O08Rik	wo.orthology	nontarget
4933406M09Rik	wo.orthology	nontarget
4933412E24Rik	wo.orthology	nontarget
4933416C03Rik	wo.orthology	DAZL.target
4933425L06Rik	w.orthology	DAZL.target
4933427D14Rik	wo.orthology	nontarget
4933428M09Rik	wo.orthology	nontarget
4933430I17Rik	wo.orthology	nontarget
4933434E20Rik	wo.orthology	nontarget
5031410I06Rik	wo.orthology	nontarget
5031439G07Rik	wo.orthology	DAZL.target
5330417C22Rik	wo.orthology	nontarget
5730409E04Rik	wo.orthology	nontarget
5730455P16Rik	wo.orthology	nontarget
5730507C01Rik	wo.orthology	nontarget
5830473C10Rik	wo.orthology	nontarget
6030458C11Rik	wo.orthology	nontarget
6330403K07Rik	wo.orthology	nontarget
6330409D20Rik	wo.orthology	nontarget
6430548M08Rik	wo.orthology	nontarget
6430550D23Rik	wo.orthology	nontarget
6430571L13Rik	wo.orthology	nontarget
6720489N17Rik	wo.orthology	nontarget
7530416G11Rik	wo.orthology	nontarget
8030462N17Rik	wo.orthology	nontarget
8030474K03Rik	wo.orthology	nontarget
9030025P20Rik	wo.orthology	nontarget
9030624G23Rik	wo.orthology	nontarget
9130008F23Rik	wo.orthology	nontarget
9130019O22Rik	wo.orthology	nontarget
9130023H24Rik	wo.orthology	nontarget
9130401M01Rik	wo.orthology	nontarget
9230019H11Rik	wo.orthology	nontarget
9330159F19Rik	wo.orthology	nontarget
9330182L06Rik	wo.orthology	nontarget
9430015G10Rik	wo.orthology	nontarget
9430038I01Rik	wo.orthology	nontarget
9530068E07Rik	wo.orthology	DAZL.target
9530077C05Rik	wo.orthology	nontarget
9830107B12Rik	wo.orthology	nontarget
9930021J03Rik	wo.orthology	DAZL.target
9930104L06Rik	wo.orthology	nontarget
9930111J21Rik1	wo.orthology	nontarget
A130010J15Rik	wo.orthology	nontarget
A230050P20Rik	wo.orthology	nontarget
A2m	wo.orthology	nontarget
A2ml1	wo.orthology	nontarget
A430005L14Rik	wo.orthology	nontarget
A430033K04Rik	wo.orthology	nontarget
A430078G23Rik	wo.orthology	nontarget
A4galt	wo.orthology	nontarget
A530064D06Rik	wo.orthology	nontarget
A630023A22Rik	wo.orthology	nontarget
A730008H23Rik	wo.orthology	nontarget
A730017C20Rik	wo.orthology	nontarget
A830010M20Rik	wo.orthology	nontarget
A830018L16Rik	wo.orthology	nontarget
A930007A09Rik	wo.orthology	nontarget
A930017K11Rik	wo.orthology	nontarget
AA414768	wo.orthology	nontarget
AA467197	wo.orthology	nontarget
AA792892	wo.orthology	nontarget
Aaas	wo.orthology	nontarget
Aacs	wo.orthology	nontarget
Aaed1	wo.orthology	nontarget
Aagab	wo.orthology	nontarget
Aak1	w.orthology	nontarget
Aamdc	wo.orthology	nontarget
Aamp	w.orthology	DAZL.target
Aar2	w.orthology	nontarget
Aard	wo.orthology	nontarget
Aars	w.orthology	nontarget
Aars2	wo.orthology	nontarget
Aarsd1	w.orthology	nontarget
Aasdh	wo.orthology	nontarget
Aasdhppt	wo.orthology	DAZL.target
Aatf	w.orthology	nontarget
AB124611	wo.orthology	nontarget
Abat	w.orthology	nontarget
Abca1	wo.orthology	DAZL.target
Abca13	wo.orthology	nontarget
Abca16	wo.orthology	nontarget
Abca17	wo.orthology	nontarget
Abca2	wo.orthology	nontarget
Abca3	wo.orthology	nontarget
Abca5	wo.orthology	nontarget
Abca6	wo.orthology	nontarget
Abca7	wo.orthology	nontarget
Abca8b	wo.orthology	nontarget
Abcb10	w.orthology	nontarget
Abcb1b	w.orthology	nontarget
Abcb6	w.orthology	nontarget
Abcb7	w.orthology	nontarget
Abcb8	w.orthology	nontarget
Abcb9	w.orthology	nontarget
Abcc1	wo.orthology	nontarget
Abcc10	wo.orthology	nontarget
Abcc3	wo.orthology	nontarget
Abcc4	wo.orthology	nontarget
Abcc5	wo.orthology	DAZL.target
Abcc8	wo.orthology	nontarget
Abcd1	w.orthology	nontarget
Abcd2	w.orthology	nontarget
Abcd3	w.orthology	DAZL.target
Abcd4	wo.orthology	nontarget
Abce1	w.orthology	nontarget
Abcf1	wo.orthology	nontarget
Abcf2	w.orthology	nontarget
Abcf3	w.orthology	nontarget
Abcg1	w.orthology	nontarget
Abcg2	w.orthology	nontarget
Abhd10	wo.orthology	nontarget
Abhd11	w.orthology	nontarget
Abhd12	wo.orthology	nontarget
Abhd13	w.orthology	nontarget
Abhd14a	w.orthology	nontarget
Abhd16a	wo.orthology	nontarget
Abhd17a	wo.orthology	DAZL.target
Abhd17b	wo.orthology	nontarget
Abhd17c	wo.orthology	DAZL.target
Abhd18	wo.orthology	nontarget
Abhd2	w.orthology	DAZL.target
Abhd3	w.orthology	nontarget
Abhd4	w.orthology	nontarget
Abhd5	w.orthology	nontarget
Abhd6	w.orthology	nontarget
Abhd8	w.orthology	nontarget
Abi1	wo.orthology	DAZL.target
Abi2	wo.orthology	nontarget
Abi3	wo.orthology	nontarget
Abi3bp	wo.orthology	nontarget
Abl1	wo.orthology	DAZL.target
Abl2	wo.orthology	DAZL.target
Ablim1	wo.orthology	nontarget
Ablim3	wo.orthology	nontarget
Abr	wo.orthology	nontarget
Abracl	wo.orthology	nontarget
Abraxas1	wo.orthology	DAZL.target
Abraxas2	wo.orthology	nontarget
Abt1	w.orthology	nontarget
Abtb1	wo.orthology	nontarget
Abtb2	wo.orthology	nontarget
Acaa1a	w.orthology	nontarget
Acaa1b	w.orthology	nontarget
Acaa2	wo.orthology	nontarget
Acaca	wo.orthology	nontarget
Acacb	wo.orthology	nontarget
Acad10	wo.orthology	nontarget
Acad11	wo.orthology	nontarget
Acad12	wo.orthology	nontarget
Acad8	wo.orthology	nontarget
Acad9	wo.orthology	nontarget
Acadl	wo.orthology	nontarget
Acadm	wo.orthology	DAZL.target
Acads	wo.orthology	nontarget
Acadsb	wo.orthology	nontarget
Acadvl	wo.orthology	nontarget
Acan	wo.orthology	nontarget
Acap2	wo.orthology	nontarget
Acap3	wo.orthology	nontarget
Acat1	w.orthology	nontarget
Acat2	wo.orthology	nontarget
Acat3	wo.orthology	nontarget
Acbd3	wo.orthology	DAZL.target
Acbd4	w.orthology	nontarget
Acbd5	w.orthology	nontarget
Acbd6	wo.orthology	nontarget
Acbd7	wo.orthology	nontarget
Accs	w.orthology	nontarget
Acd	wo.orthology	nontarget
Ace	wo.orthology	nontarget
Acer1	w.orthology	nontarget
Acer2	w.orthology	nontarget
Acer3	w.orthology	nontarget
Acin1	wo.orthology	nontarget
Ackr4	wo.orthology	nontarget
Acly	wo.orthology	DAZL.target
Acmsd	wo.orthology	nontarget
Acnat1	wo.orthology	nontarget
Aco1	wo.orthology	DAZL.target
Aco2	w.orthology	DAZL.target
Acot1	wo.orthology	nontarget
Acot11	wo.orthology	nontarget
Acot13	wo.orthology	nontarget
Acot2	wo.orthology	nontarget
Acot6	wo.orthology	nontarget
Acot7	wo.orthology	nontarget
Acot8	w.orthology	nontarget
Acot9	wo.orthology	nontarget
Acox1	wo.orthology	nontarget
Acox3	wo.orthology	nontarget
Acp1	wo.orthology	nontarget
Acp2	wo.orthology	nontarget
Acp5	wo.orthology	nontarget
Acp6	wo.orthology	nontarget
Acpp	wo.orthology	nontarget
Acr	wo.orthology	nontarget
Acrbp	wo.orthology	nontarget
Acsbg1	w.orthology	nontarget
Acsbg2	w.orthology	nontarget
Acsf2	wo.orthology	nontarget
Acsf3	wo.orthology	nontarget
Acsl1	w.orthology	DAZL.target
Acsl3	w.orthology	DAZL.target
Acsl4	w.orthology	nontarget
Acsl5	wo.orthology	nontarget
Acsm2	w.orthology	nontarget
Acss1	wo.orthology	nontarget
Acss2	wo.orthology	DAZL.target
Acta2	wo.orthology	nontarget
Actb	w.orthology	DAZL.target
Actg1	w.orthology	nontarget
Actl6a	wo.orthology	DAZL.target
Actn1	wo.orthology	DAZL.target
Actn2	wo.orthology	nontarget
Actn3	wo.orthology	nontarget
Actn4	wo.orthology	nontarget
Actr10	wo.orthology	DAZL.target
Actr1a	wo.orthology	nontarget
Actr1b	wo.orthology	nontarget
Actr2	wo.orthology	nontarget
Actr3	wo.orthology	nontarget
Actr3b	wo.orthology	nontarget
Actr5	w.orthology	nontarget
Actr6	w.orthology	DAZL.target
Actr8	w.orthology	nontarget
Acvr1	wo.orthology	nontarget
Acvr1b	wo.orthology	nontarget
Acvr2a	wo.orthology	nontarget
Acvr2b	wo.orthology	DAZL.target
Acy1	wo.orthology	nontarget
Acy3	wo.orthology	nontarget
Acyp1	wo.orthology	nontarget
Acyp2	wo.orthology	nontarget
Ada	w.orthology	nontarget
Adad1	wo.orthology	nontarget
Adad2	wo.orthology	nontarget
Adal	w.orthology	DAZL.target
Adam10	wo.orthology	DAZL.target
Adam15	wo.orthology	nontarget
Adam17	wo.orthology	nontarget
Adam19	wo.orthology	nontarget
Adam1a	wo.orthology	nontarget
Adam22	wo.orthology	nontarget
Adam23	wo.orthology	nontarget
Adam4	wo.orthology	nontarget
Adam9	wo.orthology	nontarget
Adamts10	wo.orthology	nontarget
Adamts17	wo.orthology	nontarget
Adamts19	wo.orthology	nontarget
Adamts2	wo.orthology	nontarget
Adamts20	wo.orthology	nontarget
Adamts3	wo.orthology	nontarget
Adamts4	wo.orthology	nontarget
Adamts7	wo.orthology	nontarget
Adamts9	wo.orthology	nontarget
Adamtsl4	wo.orthology	nontarget
Adap1	wo.orthology	nontarget
Adar	wo.orthology	nontarget
Adarb1	wo.orthology	nontarget
Adat1	wo.orthology	nontarget
Adat2	w.orthology	nontarget
Adat3	w.orthology	nontarget
Adck1	w.orthology	nontarget
Adck2	w.orthology	nontarget
Adck5	wo.orthology	nontarget
Adcy1	wo.orthology	nontarget
Adcy10	wo.orthology	nontarget
Adcy2	wo.orthology	nontarget
Adcy3	wo.orthology	nontarget
Adcy5	wo.orthology	nontarget
Adcy6	wo.orthology	nontarget
Adcy7	wo.orthology	nontarget
Adcy9	wo.orthology	nontarget
Adcyap1r1	wo.orthology	nontarget
Add1	wo.orthology	nontarget
Add2	wo.orthology	nontarget
Add3	wo.orthology	DAZL.target
Adgra3	wo.orthology	DAZL.target
Adgrb2	wo.orthology	nontarget
Adgrb3	wo.orthology	nontarget
Adgrd1	wo.orthology	nontarget
Adgre5	wo.orthology	nontarget
Adgrg1	wo.orthology	DAZL.target
Adgrg2	wo.orthology	nontarget
Adgrl1	wo.orthology	nontarget
Adgrl2	wo.orthology	nontarget
Adgrl3	wo.orthology	nontarget
Adgrv1	wo.orthology	nontarget
Adh5	w.orthology	nontarget
Adi1	w.orthology	DAZL.target
Adipoq	wo.orthology	nontarget
Adipor1	w.orthology	nontarget
Adipor2	wo.orthology	DAZL.target
Adk	w.orthology	DAZL.target
Adm	wo.orthology	nontarget
Adnp	wo.orthology	DAZL.target
Adnp2	wo.orthology	nontarget
Ado	wo.orthology	DAZL.target
Adora2b	wo.orthology	nontarget
Adpgk	wo.orthology	nontarget
Adprh	wo.orthology	DAZL.target
Adprhl2	wo.orthology	nontarget
Adprm	wo.orthology	nontarget
Adra2b	wo.orthology	nontarget
Adrb1	wo.orthology	nontarget
Adrb3	wo.orthology	nontarget
Adrm1	w.orthology	nontarget
Adsl	w.orthology	nontarget
Adss	w.orthology	DAZL.target
Adtrp	wo.orthology	nontarget
Aebp1	wo.orthology	nontarget
Aebp2	wo.orthology	DAZL.target
Aen	w.orthology	nontarget
Aes	wo.orthology	nontarget
Afap1	wo.orthology	nontarget
Afap1l1	wo.orthology	nontarget
Afap1l2	wo.orthology	nontarget
Afdn	wo.orthology	DAZL.target
Aff1	wo.orthology	nontarget
Aff3	wo.orthology	DAZL.target
Aff4	wo.orthology	nontarget
Afg1l	w.orthology	nontarget
Afg3l1	wo.orthology	nontarget
Afg3l2	wo.orthology	DAZL.target
Afmid	wo.orthology	nontarget
Afp	wo.orthology	nontarget
Aftph	wo.orthology	nontarget
Aga	wo.orthology	DAZL.target
Agap1	wo.orthology	nontarget
Agap2	wo.orthology	nontarget
Agap3	wo.orthology	nontarget
Agbl2	wo.orthology	nontarget
Agbl3	wo.orthology	nontarget
Agbl4	wo.orthology	nontarget
Agbl5	wo.orthology	nontarget
Agfg1	wo.orthology	DAZL.target
Agfg2	wo.orthology	nontarget
Aggf1	wo.orthology	nontarget
Agk	wo.orthology	nontarget
Agl	w.orthology	nontarget
Ago1	wo.orthology	nontarget
Ago2	wo.orthology	nontarget
Ago3	wo.orthology	nontarget
Ago4	wo.orthology	nontarget
Agpat1	w.orthology	nontarget
Agpat2	w.orthology	nontarget
Agpat3	w.orthology	nontarget
Agpat4	w.orthology	nontarget
Agpat5	w.orthology	DAZL.target
Agps	wo.orthology	DAZL.target
Agrn	wo.orthology	nontarget
Agrp	wo.orthology	nontarget
Agtpbp1	wo.orthology	nontarget
Agtrap	wo.orthology	nontarget
Ahctf1	wo.orthology	DAZL.target
Ahcy	w.orthology	nontarget
Ahcyl1	w.orthology	DAZL.target
Ahcyl2	w.orthology	nontarget
Ahdc1	wo.orthology	DAZL.target
Ahi1	wo.orthology	DAZL.target
Ahnak	wo.orthology	nontarget
Ahr	wo.orthology	nontarget
Ahsa1	wo.orthology	nontarget
Ahsa2	w.orthology	DAZL.target
Ahsg	wo.orthology	nontarget
AI182371	wo.orthology	nontarget
AI413582	wo.orthology	nontarget
AI464131	wo.orthology	nontarget
AI597479	wo.orthology	DAZL.target
AI661453	wo.orthology	nontarget
AI837181	wo.orthology	nontarget
AI987944	wo.orthology	nontarget
Aida	wo.orthology	nontarget
Aif1	wo.orthology	nontarget
Aifm1	w.orthology	nontarget
Aifm2	w.orthology	nontarget
Aifm3	w.orthology	nontarget
Aig1	wo.orthology	DAZL.target
Aim2	wo.orthology	nontarget
Aimp1	w.orthology	nontarget
Aimp2	wo.orthology	nontarget
Aip	wo.orthology	nontarget
Aipl1	wo.orthology	nontarget
Ajap1	wo.orthology	nontarget
Ajuba	wo.orthology	DAZL.target
Ak2	w.orthology	DAZL.target
Ak3	wo.orthology	nontarget
Ak4	wo.orthology	DAZL.target
Ak5	wo.orthology	nontarget
Ak6	w.orthology	nontarget
Ak7	wo.orthology	nontarget
Ak8	wo.orthology	nontarget
Akap1	wo.orthology	nontarget
Akap10	w.orthology	nontarget
Akap11	wo.orthology	DAZL.target
Akap12	wo.orthology	nontarget
Akap13	wo.orthology	DAZL.target
Akap17b	wo.orthology	DAZL.target
Akap2	wo.orthology	nontarget
Akap4	wo.orthology	nontarget
Akap5	wo.orthology	nontarget
Akap6	wo.orthology	nontarget
Akap7	wo.orthology	nontarget
Akap8	wo.orthology	DAZL.target
Akap8l	wo.orthology	nontarget
Akap9	wo.orthology	nontarget
Akip1	wo.orthology	nontarget
Akirin1	wo.orthology	DAZL.target
Akirin2	wo.orthology	DAZL.target
Akna	wo.orthology	nontarget
Akr1a1	w.orthology	nontarget
Akr1b10	w.orthology	nontarget
Akr1b3	w.orthology	nontarget
Akr1b7	w.orthology	nontarget
Akr1b8	w.orthology	nontarget
Akr1cl	w.orthology	nontarget
Akr1d1	w.orthology	nontarget
Akr1e1	w.orthology	nontarget
Akr7a5	w.orthology	nontarget
Akt1	wo.orthology	nontarget
Akt1s1	wo.orthology	nontarget
Akt2	wo.orthology	nontarget
Akt3	wo.orthology	DAZL.target
Aktip	wo.orthology	nontarget
Alad	w.orthology	nontarget
Alas1	w.orthology	nontarget
Alas2	w.orthology	nontarget
Alcam	wo.orthology	nontarget
Aldh16a1	w.orthology	nontarget
Aldh18a1	w.orthology	nontarget
Aldh1a1	w.orthology	nontarget
Aldh1a2	w.orthology	DAZL.target
Aldh1a3	w.orthology	nontarget
Aldh1b1	w.orthology	nontarget
Aldh1l1	w.orthology	nontarget
Aldh1l2	w.orthology	nontarget
Aldh2	w.orthology	nontarget
Aldh3a2	w.orthology	DAZL.target
Aldh4a1	w.orthology	nontarget
Aldh5a1	w.orthology	nontarget
Aldh6a1	w.orthology	nontarget
Aldh7a1	w.orthology	DAZL.target
Aldh9a1	w.orthology	nontarget
Aldoa	wo.orthology	nontarget
Aldoc	wo.orthology	nontarget
Alg1	w.orthology	nontarget
Alg10b	w.orthology	DAZL.target
Alg11	w.orthology	nontarget
Alg12	w.orthology	nontarget
Alg13	w.orthology	nontarget
Alg14	w.orthology	nontarget
Alg2	w.orthology	DAZL.target
Alg3	w.orthology	nontarget
Alg5	w.orthology	nontarget
Alg6	w.orthology	nontarget
Alg8	w.orthology	nontarget
Alg9	w.orthology	nontarget
Alkbh1	wo.orthology	DAZL.target
Alkbh2	wo.orthology	nontarget
Alkbh3	wo.orthology	nontarget
Alkbh4	wo.orthology	nontarget
Alkbh5	wo.orthology	DAZL.target
Alkbh6	wo.orthology	nontarget
Alkbh7	wo.orthology	nontarget
Alkbh8	w.orthology	nontarget
Alms1	wo.orthology	nontarget
Alox12	wo.orthology	nontarget
Alox12b	wo.orthology	nontarget
Alox8	wo.orthology	nontarget
Aloxe3	wo.orthology	nontarget
Alpk1	wo.orthology	nontarget
Alpl	w.orthology	nontarget
Als2	w.orthology	DAZL.target
Als2cl	wo.orthology	nontarget
Als2cr11	wo.orthology	nontarget
Alyref	wo.orthology	nontarget
Alyref2	wo.orthology	nontarget
Amacr	wo.orthology	nontarget
Ambra1	wo.orthology	nontarget
Amd1	w.orthology	nontarget
Amdhd2	wo.orthology	nontarget
Amer1	wo.orthology	nontarget
Amfr	wo.orthology	DAZL.target
Amh	wo.orthology	nontarget
Amhr2	wo.orthology	nontarget
Amigo1	wo.orthology	nontarget
Amigo2	wo.orthology	nontarget
Amigo3	wo.orthology	nontarget
Ammecr1	w.orthology	nontarget
Ammecr1l	w.orthology	DAZL.target
Amn1	wo.orthology	nontarget
Amot	wo.orthology	DAZL.target
Amotl1	wo.orthology	nontarget
Amotl2	wo.orthology	DAZL.target
Ampd2	w.orthology	DAZL.target
Ampd3	w.orthology	nontarget
Amph	w.orthology	nontarget
Amt	w.orthology	nontarget
Amy1	w.orthology	nontarget
Amy2a2	w.orthology	nontarget
Amy2a3	w.orthology	nontarget
Amy2a4	w.orthology	nontarget
Amz2	wo.orthology	nontarget
Anapc1	w.orthology	DAZL.target
Anapc10	w.orthology	DAZL.target
Anapc11	w.orthology	DAZL.target
Anapc13	wo.orthology	nontarget
Anapc15	wo.orthology	nontarget
Anapc16	wo.orthology	nontarget
Anapc2	w.orthology	nontarget
Anapc4	wo.orthology	nontarget
Anapc5	w.orthology	nontarget
Anapc7	wo.orthology	nontarget
Angel1	w.orthology	DAZL.target
Angel2	w.orthology	DAZL.target
Angpt2	wo.orthology	nontarget
Angptl1	wo.orthology	nontarget
Angptl2	wo.orthology	nontarget
Angptl3	wo.orthology	nontarget
Angptl4	wo.orthology	nontarget
Angptl6	wo.orthology	nontarget
Angptl7	wo.orthology	nontarget
Ank	wo.orthology	DAZL.target
Ank1	wo.orthology	nontarget
Ank2	wo.orthology	nontarget
Ank3	wo.orthology	nontarget
Ankef1	wo.orthology	nontarget
Ankfy1	w.orthology	DAZL.target
Ankhd1	wo.orthology	nontarget
Ankib1	wo.orthology	nontarget
Ankle1	wo.orthology	nontarget
Ankle2	wo.orthology	nontarget
Ankmy2	wo.orthology	nontarget
Ankra2	wo.orthology	nontarget
Ankrd10	wo.orthology	DAZL.target
Ankrd11	wo.orthology	nontarget
Ankrd12	wo.orthology	DAZL.target
Ankrd13a	wo.orthology	nontarget
Ankrd13b	wo.orthology	nontarget
Ankrd13c	wo.orthology	DAZL.target
Ankrd13d	wo.orthology	nontarget
Ankrd16	wo.orthology	nontarget
Ankrd17	wo.orthology	DAZL.target
Ankrd23	wo.orthology	nontarget
Ankrd24	wo.orthology	nontarget
Ankrd26	wo.orthology	nontarget
Ankrd27	wo.orthology	nontarget
Ankrd28	wo.orthology	nontarget
Ankrd29	wo.orthology	DAZL.target
Ankrd34b	wo.orthology	nontarget
Ankrd36	wo.orthology	nontarget
Ankrd37	wo.orthology	nontarget
Ankrd39	wo.orthology	nontarget
Ankrd40	wo.orthology	nontarget
Ankrd42	wo.orthology	nontarget
Ankrd44	wo.orthology	nontarget
Ankrd45	wo.orthology	DAZL.target
Ankrd46	wo.orthology	DAZL.target
Ankrd49	wo.orthology	nontarget
Ankrd50	wo.orthology	nontarget
Ankrd52	wo.orthology	nontarget
Ankrd54	wo.orthology	nontarget
Ankrd6	wo.orthology	nontarget
Ankrd61	wo.orthology	nontarget
Ankrd66	wo.orthology	nontarget
Ankrd9	wo.orthology	nontarget
Anks1	wo.orthology	nontarget
Anks1b	wo.orthology	nontarget
Anks3	wo.orthology	nontarget
Ankub1	wo.orthology	nontarget
Ankzf1	w.orthology	nontarget
Anln	wo.orthology	DAZL.target
Ano1	wo.orthology	nontarget
Ano10	wo.orthology	nontarget
Ano3	wo.orthology	nontarget
Ano6	wo.orthology	nontarget
Anp32a	wo.orthology	nontarget
Anp32b	wo.orthology	nontarget
Anp32e	wo.orthology	DAZL.target
Anpep	wo.orthology	nontarget
Antxr1	wo.orthology	nontarget
Antxr2	wo.orthology	nontarget
Anxa11	wo.orthology	nontarget
Anxa13	wo.orthology	nontarget
Anxa2	wo.orthology	nontarget
Anxa4	wo.orthology	nontarget
Anxa5	wo.orthology	nontarget
Anxa7	wo.orthology	DAZL.target
Anxa9	wo.orthology	nontarget
Aoc2	wo.orthology	nontarget
Aox4	wo.orthology	nontarget
Ap1ar	wo.orthology	DAZL.target
Ap1b1	wo.orthology	nontarget
Ap1g1	w.orthology	DAZL.target
Ap1g2	w.orthology	nontarget
Ap1m1	wo.orthology	nontarget
Ap1m2	wo.orthology	nontarget
Ap1s1	w.orthology	nontarget
Ap1s2	w.orthology	nontarget
Ap1s3	w.orthology	nontarget
Ap2a1	w.orthology	DAZL.target
Ap2a2	w.orthology	nontarget
Ap2b1	w.orthology	nontarget
Ap2m1	w.orthology	nontarget
Ap2s1	w.orthology	nontarget
Ap3b1	w.orthology	nontarget
Ap3b2	w.orthology	nontarget
Ap3d1	w.orthology	nontarget
Ap3m1	wo.orthology	nontarget
Ap3m2	wo.orthology	nontarget
Ap3s1	w.orthology	nontarget
Ap3s2	w.orthology	DAZL.target
Ap4b1	w.orthology	nontarget
Ap4e1	wo.orthology	nontarget
Ap4m1	wo.orthology	nontarget
Ap4s1	w.orthology	nontarget
Ap5b1	wo.orthology	nontarget
Ap5m1	wo.orthology	nontarget
Ap5s1	wo.orthology	nontarget
Ap5z1	wo.orthology	nontarget
Apaf1	wo.orthology	nontarget
Apba1	wo.orthology	nontarget
Apba2	wo.orthology	DAZL.target
Apba3	wo.orthology	nontarget
Apbb1	wo.orthology	nontarget
Apbb1ip	wo.orthology	DAZL.target
Apbb2	wo.orthology	nontarget
Apbb3	wo.orthology	nontarget
Apc	wo.orthology	DAZL.target
Apc2	wo.orthology	nontarget
Apcdd1	wo.orthology	nontarget
Apeh	wo.orthology	nontarget
Apela	wo.orthology	nontarget
Apex1	w.orthology	DAZL.target
Apex2	w.orthology	nontarget
Aph1a	wo.orthology	nontarget
Aph1b	wo.orthology	nontarget
Aph1c	wo.orthology	nontarget
Api5	wo.orthology	DAZL.target
Apip	w.orthology	nontarget
Aplf	wo.orthology	nontarget
Apln	wo.orthology	nontarget
Aplp1	wo.orthology	nontarget
Aplp2	wo.orthology	DAZL.target
Apmap	wo.orthology	nontarget
Apoa2	wo.orthology	nontarget
Apobec1	wo.orthology	nontarget
Apobec2	wo.orthology	nontarget
Apobec3	wo.orthology	nontarget
Apobec4	wo.orthology	nontarget
Apoc1	wo.orthology	nontarget
Apoc2	wo.orthology	nontarget
Apod	wo.orthology	nontarget
Apoe	wo.orthology	nontarget
Apof	wo.orthology	nontarget
Apol6	wo.orthology	nontarget
Apol7b	wo.orthology	nontarget
Apold1	wo.orthology	nontarget
Apoo	wo.orthology	nontarget
Apool	wo.orthology	nontarget
Apopt1	wo.orthology	nontarget
App	wo.orthology	nontarget
Appbp2	wo.orthology	DAZL.target
Appl1	wo.orthology	DAZL.target
Appl2	wo.orthology	nontarget
Aprt	wo.orthology	nontarget
Aptx	w.orthology	nontarget
Aqp11	wo.orthology	nontarget
Aqp5	w.orthology	nontarget
Aqp7	w.orthology	nontarget
Aqp9	w.orthology	nontarget
Aqr	wo.orthology	DAZL.target
Ar	wo.orthology	nontarget
Araf	wo.orthology	DAZL.target
Arap1	wo.orthology	nontarget
Arap2	wo.orthology	nontarget
Arap3	wo.orthology	nontarget
Arc	wo.orthology	nontarget
Arcn1	w.orthology	DAZL.target
Arel1	wo.orthology	nontarget
Arf1	wo.orthology	DAZL.target
Arf2	wo.orthology	nontarget
Arf3	wo.orthology	DAZL.target
Arf4	wo.orthology	DAZL.target
Arf5	wo.orthology	nontarget
Arf6	wo.orthology	DAZL.target
Arfgap1	wo.orthology	nontarget
Arfgap2	wo.orthology	nontarget
Arfgap3	wo.orthology	DAZL.target
Arfgef1	w.orthology	DAZL.target
Arfgef2	w.orthology	nontarget
Arfgef3	wo.orthology	nontarget
Arfip1	wo.orthology	DAZL.target
Arfip2	wo.orthology	nontarget
Arfrp1	w.orthology	nontarget
Arg1	w.orthology	nontarget
Arg2	w.orthology	nontarget
Arglu1	wo.orthology	DAZL.target
Arhgap1	wo.orthology	DAZL.target
Arhgap10	wo.orthology	nontarget
Arhgap11a	wo.orthology	nontarget
Arhgap12	wo.orthology	nontarget
Arhgap17	wo.orthology	DAZL.target
Arhgap18	wo.orthology	nontarget
Arhgap19	wo.orthology	nontarget
Arhgap20	wo.orthology	nontarget
Arhgap21	wo.orthology	nontarget
Arhgap22	wo.orthology	nontarget
Arhgap23	wo.orthology	nontarget
Arhgap25	wo.orthology	nontarget
Arhgap26	wo.orthology	nontarget
Arhgap28	wo.orthology	nontarget
Arhgap29	w.orthology	DAZL.target
Arhgap30	wo.orthology	nontarget
Arhgap31	wo.orthology	nontarget
Arhgap32	wo.orthology	DAZL.target
Arhgap33	wo.orthology	nontarget
Arhgap35	w.orthology	nontarget
Arhgap39	wo.orthology	nontarget
Arhgap4	wo.orthology	nontarget
Arhgap42	wo.orthology	nontarget
Arhgap44	wo.orthology	DAZL.target
Arhgap45	w.orthology	nontarget
Arhgap5	wo.orthology	DAZL.target
Arhgap8	wo.orthology	nontarget
Arhgap9	wo.orthology	nontarget
Arhgdia	w.orthology	nontarget
Arhgdig	w.orthology	nontarget
Arhgef1	wo.orthology	DAZL.target
Arhgef10	wo.orthology	nontarget
Arhgef10l	wo.orthology	nontarget
Arhgef11	wo.orthology	DAZL.target
Arhgef12	wo.orthology	nontarget
Arhgef15	wo.orthology	nontarget
Arhgef16	wo.orthology	nontarget
Arhgef17	wo.orthology	nontarget
Arhgef18	wo.orthology	DAZL.target
Arhgef2	wo.orthology	DAZL.target
Arhgef25	wo.orthology	nontarget
Arhgef26	wo.orthology	nontarget
Arhgef28	wo.orthology	nontarget
Arhgef3	wo.orthology	DAZL.target
Arhgef33	wo.orthology	nontarget
Arhgef37	wo.orthology	nontarget
Arhgef39	w.orthology	nontarget
Arhgef4	wo.orthology	nontarget
Arhgef40	wo.orthology	nontarget
Arhgef5	wo.orthology	nontarget
Arhgef7	wo.orthology	DAZL.target
Arhgef9	wo.orthology	nontarget
Arid1a	wo.orthology	DAZL.target
Arid1b	wo.orthology	nontarget
Arid2	wo.orthology	nontarget
Arid3a	wo.orthology	nontarget
Arid3b	wo.orthology	nontarget
Arid3c	wo.orthology	nontarget
Arid4a	wo.orthology	nontarget
Arid4b	wo.orthology	DAZL.target
Arid5a	wo.orthology	nontarget
Arid5b	wo.orthology	nontarget
Arih1	w.orthology	DAZL.target
Arih2	wo.orthology	DAZL.target
Arl1	w.orthology	nontarget
Arl10	wo.orthology	nontarget
Arl13b	wo.orthology	nontarget
Arl14ep	wo.orthology	nontarget
Arl14epl	wo.orthology	DAZL.target
Arl15	wo.orthology	nontarget
Arl16	wo.orthology	nontarget
Arl2	w.orthology	nontarget
Arl2bp	wo.orthology	DAZL.target
Arl3	wo.orthology	nontarget
Arl4a	wo.orthology	nontarget
Arl4c	wo.orthology	nontarget
Arl4d	wo.orthology	nontarget
Arl5a	wo.orthology	DAZL.target
Arl5b	wo.orthology	DAZL.target
Arl6	wo.orthology	nontarget
Arl6ip1	wo.orthology	DAZL.target
Arl6ip4	wo.orthology	nontarget
Arl6ip5	wo.orthology	nontarget
Arl6ip6	wo.orthology	DAZL.target
Arl8a	wo.orthology	DAZL.target
Arl8b	wo.orthology	nontarget
Armc1	wo.orthology	nontarget
Armc10	wo.orthology	nontarget
Armc2	wo.orthology	nontarget
Armc5	wo.orthology	nontarget
Armc6	wo.orthology	nontarget
Armc7	wo.orthology	nontarget
Armc8	w.orthology	DAZL.target
Armc9	wo.orthology	nontarget
Armcx1	wo.orthology	nontarget
Armcx2	wo.orthology	DAZL.target
Armcx3	wo.orthology	nontarget
Armcx4	wo.orthology	nontarget
Armcx5	wo.orthology	nontarget
Armcx6	wo.orthology	nontarget
Armh3	wo.orthology	nontarget
Armh4	wo.orthology	nontarget
Armt1	w.orthology	nontarget
Arnt	wo.orthology	nontarget
Arnt2	wo.orthology	nontarget
Arntl	wo.orthology	DAZL.target
Arntl2	wo.orthology	nontarget
Arpc1a	w.orthology	DAZL.target
Arpc1b	w.orthology	nontarget
Arpc2	w.orthology	DAZL.target
Arpc3	w.orthology	DAZL.target
Arpc4	w.orthology	nontarget
Arpc5	w.orthology	DAZL.target
Arpc5l	w.orthology	DAZL.target
Arpp19	w.orthology	nontarget
Arrb1	wo.orthology	nontarget
Arrb2	wo.orthology	nontarget
Arrdc1	w.orthology	nontarget
Arrdc2	w.orthology	nontarget
Arrdc3	w.orthology	DAZL.target
Arrdc4	w.orthology	DAZL.target
Arsa	wo.orthology	nontarget
Arsb	wo.orthology	nontarget
Arsg	wo.orthology	nontarget
Arsk	wo.orthology	nontarget
Art1	wo.orthology	nontarget
Art2b	wo.orthology	nontarget
Art3	wo.orthology	nontarget
Art5	wo.orthology	nontarget
Arv1	w.orthology	nontarget
Arvcf	wo.orthology	nontarget
Arxes1	w.orthology	nontarget
Arxes2	w.orthology	nontarget
As3mt	w.orthology	nontarget
Asah1	wo.orthology	DAZL.target
Asah2	wo.orthology	nontarget
Asap1	wo.orthology	nontarget
Asap2	wo.orthology	nontarget
Asap3	wo.orthology	nontarget
Asb1	wo.orthology	nontarget
Asb13	wo.orthology	nontarget
Asb16	wo.orthology	nontarget
Asb3	wo.orthology	DAZL.target
Asb5	wo.orthology	nontarget
Asb6	wo.orthology	nontarget
Asb7	wo.orthology	nontarget
Asb8	wo.orthology	DAZL.target
Asb9	wo.orthology	nontarget
Ascc1	wo.orthology	nontarget
Ascc2	wo.orthology	nontarget
Ascc3	w.orthology	DAZL.target
Ascl2	wo.orthology	nontarget
Ascl4	wo.orthology	nontarget
Asdurf	wo.orthology	nontarget
Asf1a	w.orthology	DAZL.target
Asf1b	w.orthology	nontarget
Asgr2	wo.orthology	nontarget
Ash1l	wo.orthology	nontarget
Ash2l	w.orthology	nontarget
Asic1	wo.orthology	nontarget
Asl	w.orthology	nontarget
Asna1	w.orthology	nontarget
Asns	wo.orthology	nontarget
Asnsd1	w.orthology	nontarget
Aspa	wo.orthology	nontarget
Aspdh	wo.orthology	nontarget
Aspg	w.orthology	nontarget
Asph	wo.orthology	nontarget
Asphd1	wo.orthology	nontarget
Asphd2	wo.orthology	nontarget
Aspm	wo.orthology	nontarget
Aspn	wo.orthology	nontarget
Aspscr1	wo.orthology	nontarget
Asrgl1	wo.orthology	nontarget
Ass1	w.orthology	nontarget
Aste1	wo.orthology	nontarget
Astn2	wo.orthology	nontarget
Asxl1	wo.orthology	nontarget
Asxl2	wo.orthology	nontarget
Asxl3	wo.orthology	nontarget
Asz1	wo.orthology	DAZL.target
Atad1	w.orthology	DAZL.target
Atad2	w.orthology	DAZL.target
Atad2b	w.orthology	DAZL.target
Atad3a	wo.orthology	nontarget
Atad5	wo.orthology	nontarget
Atat1	wo.orthology	nontarget
Atcay	wo.orthology	nontarget
Ate1	w.orthology	nontarget
Atf1	wo.orthology	DAZL.target
Atf2	w.orthology	DAZL.target
Atf4	wo.orthology	nontarget
Atf6	wo.orthology	nontarget
Atf6b	wo.orthology	nontarget
Atf7	w.orthology	nontarget
Atf7ip	wo.orthology	nontarget
Atf7ip2	wo.orthology	DAZL.target
Atg10	wo.orthology	nontarget
Atg101	wo.orthology	DAZL.target
Atg12	w.orthology	nontarget
Atg13	wo.orthology	nontarget
Atg14	wo.orthology	DAZL.target
Atg16l1	wo.orthology	nontarget
Atg16l2	wo.orthology	nontarget
Atg2a	w.orthology	nontarget
Atg2b	w.orthology	nontarget
Atg3	w.orthology	nontarget
Atg4a	w.orthology	nontarget
Atg4b	w.orthology	nontarget
Atg4c	w.orthology	nontarget
Atg4d	w.orthology	nontarget
Atg5	w.orthology	DAZL.target
Atg7	w.orthology	nontarget
Atg9a	w.orthology	nontarget
Atic	w.orthology	DAZL.target
Atl1	wo.orthology	DAZL.target
Atl2	wo.orthology	nontarget
Atl3	wo.orthology	nontarget
Atm	wo.orthology	DAZL.target
Atmin	wo.orthology	nontarget
Atn1	wo.orthology	nontarget
Atoh7	wo.orthology	nontarget
Atoh8	wo.orthology	nontarget
Atox1	wo.orthology	nontarget
Atp10a	wo.orthology	nontarget
Atp11a	wo.orthology	nontarget
Atp11b	wo.orthology	DAZL.target
Atp11c	wo.orthology	DAZL.target
Atp13a1	w.orthology	nontarget
Atp13a2	w.orthology	nontarget
Atp13a3	w.orthology	nontarget
Atp1a1	w.orthology	nontarget
Atp1a2	w.orthology	nontarget
Atp1b1	wo.orthology	nontarget
Atp1b2	wo.orthology	nontarget
Atp1b3	wo.orthology	nontarget
Atp23	w.orthology	nontarget
Atp2a1	w.orthology	nontarget
Atp2a2	w.orthology	DAZL.target
Atp2b1	w.orthology	DAZL.target
Atp2b4	w.orthology	DAZL.target
Atp2c1	w.orthology	nontarget
Atp4a	w.orthology	nontarget
Atp5a1	w.orthology	nontarget
Atp5b	w.orthology	DAZL.target
Atp5c1	w.orthology	nontarget
Atp5d	w.orthology	nontarget
Atp5e	wo.orthology	nontarget
Atp5f1	w.orthology	nontarget
Atp5g1	w.orthology	nontarget
Atp5g2	w.orthology	nontarget
Atp5g3	wo.orthology	DAZL.target
Atp5h	w.orthology	nontarget
Atp5j	wo.orthology	nontarget
Atp5j2	wo.orthology	nontarget
Atp5l	w.orthology	nontarget
Atp5mpl	wo.orthology	nontarget
Atp5o	w.orthology	nontarget
Atp5s	wo.orthology	nontarget
Atp6ap1	wo.orthology	DAZL.target
Atp6ap2	wo.orthology	DAZL.target
Atp6v0a1	w.orthology	nontarget
Atp6v0a2	w.orthology	nontarget
Atp6v0b	w.orthology	nontarget
Atp6v0c	w.orthology	nontarget
Atp6v0d1	w.orthology	nontarget
Atp6v0e	wo.orthology	nontarget
Atp6v0e2	wo.orthology	nontarget
Atp6v1a	w.orthology	DAZL.target
Atp6v1b2	wo.orthology	DAZL.target
Atp6v1c1	w.orthology	nontarget
Atp6v1c2	w.orthology	nontarget
Atp6v1d	w.orthology	nontarget
Atp6v1e1	w.orthology	nontarget
Atp6v1f	w.orthology	DAZL.target
Atp6v1g1	wo.orthology	DAZL.target
Atp6v1g2	wo.orthology	nontarget
Atp6v1h	w.orthology	DAZL.target
Atp7a	w.orthology	DAZL.target
Atp7b	w.orthology	nontarget
Atp8a1	wo.orthology	nontarget
Atp8a2	wo.orthology	nontarget
Atp8b2	wo.orthology	nontarget
Atp8b3	wo.orthology	nontarget
Atp8b4	wo.orthology	nontarget
Atp8b5	wo.orthology	nontarget
Atp9a	wo.orthology	nontarget
Atp9b	wo.orthology	nontarget
Atpaf1	w.orthology	nontarget
Atpaf2	w.orthology	nontarget
Atpif1	wo.orthology	nontarget
Atr	wo.orthology	nontarget
Atraid	wo.orthology	nontarget
Atrip	wo.orthology	nontarget
Atrn	wo.orthology	nontarget
Atrnl1	wo.orthology	nontarget
Atrx	wo.orthology	DAZL.target
Atxn1	wo.orthology	nontarget
Atxn10	w.orthology	nontarget
Atxn1l	wo.orthology	nontarget
Atxn2	w.orthology	nontarget
Atxn2l	w.orthology	DAZL.target
Atxn3	wo.orthology	nontarget
Atxn7	w.orthology	nontarget
Atxn7l1	w.orthology	nontarget
Atxn7l2	w.orthology	nontarget
Atxn7l3	w.orthology	nontarget
Atxn7l3b	w.orthology	DAZL.target
AU018091	w.orthology	nontarget
AU022252	wo.orthology	nontarget
AU022751	wo.orthology	nontarget
AU040320	wo.orthology	nontarget
AU041133	wo.orthology	nontarget
Auh	w.orthology	nontarget
Aunip	wo.orthology	nontarget
Aup1	wo.orthology	nontarget
Aurka	wo.orthology	nontarget
Aurkaip1	wo.orthology	nontarget
Aurkb	wo.orthology	nontarget
Aurkc	wo.orthology	nontarget
Auts2	wo.orthology	DAZL.target
AV320801	wo.orthology	nontarget
Aven	wo.orthology	nontarget
Avl9	w.orthology	DAZL.target
Avpi1	wo.orthology	nontarget
AW146154	wo.orthology	nontarget
AW209491	wo.orthology	nontarget
AW549877	wo.orthology	nontarget
AW554918	wo.orthology	nontarget
Awat2	w.orthology	nontarget
Axdnd1	wo.orthology	nontarget
Axin1	wo.orthology	nontarget
Axin2	wo.orthology	DAZL.target
Axl	wo.orthology	nontarget
AY074887	wo.orthology	nontarget
AY358078	wo.orthology	nontarget
Azi2	wo.orthology	nontarget
Azin1	w.orthology	DAZL.target
Azin2	w.orthology	nontarget
B230118H07Rik	wo.orthology	nontarget
B230217C12Rik	wo.orthology	nontarget
B230219D22Rik	wo.orthology	nontarget
B230307C23Rik	wo.orthology	nontarget
B230311B06Rik	wo.orthology	nontarget
B2m	wo.orthology	DAZL.target
B3galnt1	wo.orthology	nontarget
B3galnt2	wo.orthology	nontarget
B3galt1	wo.orthology	nontarget
B3galt2	wo.orthology	nontarget
B3galt4	wo.orthology	nontarget
B3galt6	wo.orthology	nontarget
B3gat1	wo.orthology	nontarget
B3gat2	wo.orthology	DAZL.target
B3gat3	wo.orthology	nontarget
B3glct	wo.orthology	nontarget
B3gnt2	wo.orthology	nontarget
B3gnt4	wo.orthology	nontarget
B3gnt5	wo.orthology	DAZL.target
B3gnt7	wo.orthology	nontarget
B3gnt8	wo.orthology	nontarget
B3gnt9	wo.orthology	nontarget
B3gntl1	wo.orthology	nontarget
B430306N03Rik	wo.orthology	nontarget
B4galnt1	wo.orthology	nontarget
B4galnt2	wo.orthology	nontarget
B4galnt3	wo.orthology	nontarget
B4galnt4	wo.orthology	nontarget
B4galt1	wo.orthology	DAZL.target
B4galt2	wo.orthology	nontarget
B4galt3	wo.orthology	nontarget
B4galt4	wo.orthology	nontarget
B4galt5	wo.orthology	DAZL.target
B4galt6	wo.orthology	nontarget
B4galt7	wo.orthology	nontarget
B4gat1	wo.orthology	nontarget
B9d1	wo.orthology	nontarget
B9d2	wo.orthology	nontarget
Babam1	wo.orthology	nontarget
Babam2	wo.orthology	nontarget
Bace1	wo.orthology	nontarget
Bach1	wo.orthology	nontarget
Bach2	wo.orthology	nontarget
Bad	wo.orthology	nontarget
Bag1	wo.orthology	nontarget
Bag2	wo.orthology	nontarget
Bag3	wo.orthology	nontarget
Bag4	wo.orthology	DAZL.target
Bag5	wo.orthology	nontarget
Bag6	wo.orthology	nontarget
Bahcc1	wo.orthology	nontarget
Bahd1	wo.orthology	DAZL.target
Baiap2	wo.orthology	nontarget
Baiap2l1	wo.orthology	nontarget
Baiap3	w.orthology	nontarget
Bak1	wo.orthology	nontarget
Bambi	wo.orthology	nontarget
Banf1	wo.orthology	DAZL.target
Bank1	wo.orthology	nontarget
Banp	wo.orthology	nontarget
Bap1	wo.orthology	nontarget
Bard1	wo.orthology	nontarget
Barhl1	wo.orthology	nontarget
Barhl2	wo.orthology	nontarget
Barx1	wo.orthology	nontarget
Basp1	wo.orthology	nontarget
Batf	wo.orthology	nontarget
Batf3	wo.orthology	nontarget
Bax	wo.orthology	nontarget
Baz1a	w.orthology	nontarget
Baz1b	w.orthology	DAZL.target
Baz2a	w.orthology	DAZL.target
Baz2b	w.orthology	DAZL.target
Bbc3	wo.orthology	nontarget
Bbip1	wo.orthology	DAZL.target
Bbof1	wo.orthology	nontarget
Bbs1	wo.orthology	nontarget
Bbs10	wo.orthology	nontarget
Bbs12	wo.orthology	nontarget
Bbs2	wo.orthology	nontarget
Bbs4	wo.orthology	nontarget
Bbs5	wo.orthology	nontarget
Bbs7	wo.orthology	nontarget
Bbs9	wo.orthology	nontarget
Bbx	wo.orthology	nontarget
BC003965	wo.orthology	nontarget
BC004004	wo.orthology	nontarget
BC005537	wo.orthology	DAZL.target
BC005561	w.orthology	nontarget
BC005624	wo.orthology	nontarget
BC017158	wo.orthology	nontarget
BC024978	wo.orthology	nontarget
BC028528	wo.orthology	nontarget
BC030867	wo.orthology	nontarget
BC030870	wo.orthology	nontarget
BC031181	wo.orthology	nontarget
BC037034	wo.orthology	nontarget
BC048403	wo.orthology	DAZL.target
BC048507	w.orthology	nontarget
BC048644	wo.orthology	nontarget
BC049715	wo.orthology	nontarget
BC049730	wo.orthology	nontarget
BC049762	wo.orthology	nontarget
BC052040	wo.orthology	nontarget
BC055324	wo.orthology	nontarget
BC061237	wo.orthology	nontarget
BC107364	wo.orthology	nontarget
Bcan	wo.orthology	nontarget
Bcap29	w.orthology	DAZL.target
Bcap31	w.orthology	DAZL.target
Bcar1	wo.orthology	nontarget
Bcar3	wo.orthology	nontarget
Bcas1	wo.orthology	nontarget
Bcas2	wo.orthology	DAZL.target
Bcas3	wo.orthology	nontarget
Bcat2	w.orthology	nontarget
Bccip	w.orthology	nontarget
Bcdin3d	wo.orthology	nontarget
Bckdha	w.orthology	nontarget
Bckdhb	wo.orthology	nontarget
Bckdk	w.orthology	nontarget
Bcl10	wo.orthology	DAZL.target
Bcl11a	wo.orthology	nontarget
Bcl11b	wo.orthology	nontarget
Bcl2l1	wo.orthology	nontarget
Bcl2l11	wo.orthology	nontarget
Bcl2l12	wo.orthology	nontarget
Bcl2l13	wo.orthology	nontarget
Bcl2l2	wo.orthology	nontarget
Bcl6	wo.orthology	nontarget
Bcl6b	wo.orthology	DAZL.target
Bcl7a	wo.orthology	DAZL.target
Bcl7b	wo.orthology	nontarget
Bcl7c	wo.orthology	nontarget
Bcl9	wo.orthology	nontarget
Bcl9l	wo.orthology	nontarget
Bclaf1	wo.orthology	DAZL.target
Bclaf3	wo.orthology	nontarget
Bco1	wo.orthology	nontarget
Bco2	wo.orthology	nontarget
Bcor	wo.orthology	DAZL.target
Bcorl1	wo.orthology	DAZL.target
Bcr	wo.orthology	DAZL.target
Bcs1l	w.orthology	nontarget
Bdh1	wo.orthology	nontarget
Bdkrb2	wo.orthology	nontarget
Bdnf	wo.orthology	nontarget
Bdp1	w.orthology	DAZL.target
Bean1	wo.orthology	nontarget
Becn1	w.orthology	DAZL.target
Begain	wo.orthology	nontarget
Bend3	wo.orthology	nontarget
Bend4	wo.orthology	DAZL.target
Bend5	wo.orthology	nontarget
Bend6	wo.orthology	nontarget
Bend7	wo.orthology	nontarget
Best1	wo.orthology	nontarget
Best3	wo.orthology	nontarget
Bet1	w.orthology	nontarget
Bet1l	wo.orthology	nontarget
Bex1	wo.orthology	nontarget
Bex2	wo.orthology	nontarget
Bex3	wo.orthology	nontarget
Bex4	wo.orthology	nontarget
Bfar	wo.orthology	nontarget
Bfsp1	wo.orthology	nontarget
Bglap2	wo.orthology	nontarget
Bglap3	wo.orthology	nontarget
Bgn	wo.orthology	nontarget
Bhlhb9	wo.orthology	nontarget
Bhlhe41	w.orthology	DAZL.target
Bicc1	wo.orthology	DAZL.target
Bicd1	wo.orthology	nontarget
Bicd2	wo.orthology	DAZL.target
Bicdl1	wo.orthology	nontarget
Bicra	wo.orthology	nontarget
Bicral	wo.orthology	nontarget
Bid	wo.orthology	nontarget
Bik	wo.orthology	nontarget
Bin1	w.orthology	nontarget
Bin2	w.orthology	nontarget
Bin3	w.orthology	nontarget
Birc2	wo.orthology	nontarget
Birc3	wo.orthology	nontarget
Birc5	wo.orthology	nontarget
Birc6	wo.orthology	DAZL.target
Bivm	wo.orthology	nontarget
Blcap	wo.orthology	DAZL.target
Blm	w.orthology	DAZL.target
Blmh	w.orthology	nontarget
Bloc1s1	wo.orthology	nontarget
Bloc1s2	wo.orthology	nontarget
Bloc1s3	wo.orthology	nontarget
Bloc1s4	wo.orthology	nontarget
Bloc1s5	wo.orthology	nontarget
Bloc1s6	wo.orthology	DAZL.target
Blvra	wo.orthology	nontarget
Blvrb	w.orthology	nontarget
Blzf1	wo.orthology	nontarget
Bmf	wo.orthology	nontarget
Bmi1	wo.orthology	DAZL.target
Bmp2k	w.orthology	nontarget
Bmp3	wo.orthology	nontarget
Bmp4	wo.orthology	nontarget
Bmp5	wo.orthology	nontarget
Bmp6	wo.orthology	DAZL.target
Bmp7	wo.orthology	nontarget
Bmp8b	wo.orthology	nontarget
Bmpr1a	wo.orthology	DAZL.target
Bmpr1b	wo.orthology	nontarget
Bmpr2	wo.orthology	nontarget
Bms1	w.orthology	nontarget
Bmt2	wo.orthology	nontarget
Bmyc	wo.orthology	nontarget
Bnc1	wo.orthology	DAZL.target
Bnc2	wo.orthology	DAZL.target
Bnip1	w.orthology	nontarget
Bnip2	wo.orthology	nontarget
Bnip3	wo.orthology	DAZL.target
Bnip3l	wo.orthology	DAZL.target
Boc	wo.orthology	nontarget
Bod1	wo.orthology	DAZL.target
Bod1l	wo.orthology	nontarget
Bok	wo.orthology	nontarget
Bola1	w.orthology	nontarget
Bola2	w.orthology	nontarget
Bola3	w.orthology	nontarget
Boll	wo.orthology	nontarget
Bop1	w.orthology	nontarget
Borcs5	wo.orthology	nontarget
Borcs6	wo.orthology	nontarget
Borcs7	wo.orthology	nontarget
Borcs8	wo.orthology	nontarget
Bpgm	w.orthology	nontarget
Bphl	w.orthology	nontarget
Bpifc	wo.orthology	nontarget
Bpnt1	wo.orthology	nontarget
Bptf	w.orthology	nontarget
Braf	wo.orthology	DAZL.target
Brap	w.orthology	nontarget
Brat1	wo.orthology	DAZL.target
Brca1	wo.orthology	nontarget
Brca2	wo.orthology	nontarget
Brcc3	wo.orthology	nontarget
Brd1	w.orthology	DAZL.target
Brd2	w.orthology	DAZL.target
Brd3	w.orthology	DAZL.target
Brd3os	wo.orthology	nontarget
Brd4	w.orthology	DAZL.target
Brd7	wo.orthology	DAZL.target
Brd8	wo.orthology	nontarget
Brd9	wo.orthology	nontarget
Brdt	w.orthology	DAZL.target
Brf1	w.orthology	nontarget
Brf2	wo.orthology	nontarget
Bri3	wo.orthology	nontarget
Bri3bp	wo.orthology	nontarget
Brinp1	wo.orthology	nontarget
Brinp2	wo.orthology	nontarget
Brip1	wo.orthology	nontarget
Brix1	w.orthology	nontarget
Brk1	wo.orthology	DAZL.target
Brms1	wo.orthology	nontarget
Brms1l	wo.orthology	nontarget
Brox	wo.orthology	nontarget
Brpf1	w.orthology	nontarget
Brpf3	w.orthology	nontarget
Brsk1	w.orthology	nontarget
Brsk2	w.orthology	DAZL.target
Brwd1	wo.orthology	DAZL.target
Brwd3	wo.orthology	nontarget
Bscl2	wo.orthology	nontarget
Bsdc1	wo.orthology	nontarget
Bsg	wo.orthology	nontarget
Bspry	wo.orthology	nontarget
Bst2	wo.orthology	nontarget
Btaf1	w.orthology	DAZL.target
Btbd1	wo.orthology	nontarget
Btbd10	wo.orthology	DAZL.target
Btbd11	wo.orthology	nontarget
Btbd16	wo.orthology	nontarget
Btbd18	wo.orthology	nontarget
Btbd2	wo.orthology	nontarget
Btbd3	wo.orthology	DAZL.target
Btbd6	wo.orthology	nontarget
Btbd7	wo.orthology	DAZL.target
Btbd8	wo.orthology	nontarget
Btbd9	wo.orthology	nontarget
Btc	wo.orthology	nontarget
Btd	wo.orthology	nontarget
Btf3	wo.orthology	nontarget
Btf3l4	wo.orthology	nontarget
Btg1	wo.orthology	nontarget
Btg2	wo.orthology	nontarget
Btg3	wo.orthology	nontarget
Btn2a2	wo.orthology	nontarget
Btnl10	wo.orthology	nontarget
Btnl4	wo.orthology	nontarget
Btrc	w.orthology	nontarget
Bub1	w.orthology	nontarget
Bub1b	w.orthology	DAZL.target
Bub3	w.orthology	DAZL.target
Bud13	w.orthology	nontarget
Bud23	w.orthology	nontarget
Bud31	w.orthology	nontarget
Bves	wo.orthology	nontarget
Bysl	w.orthology	nontarget
Bzw1	wo.orthology	DAZL.target
Bzw2	wo.orthology	nontarget
C130050O18Rik	wo.orthology	nontarget
C130074G19Rik	wo.orthology	nontarget
C1d	wo.orthology	DAZL.target
C1galt1	wo.orthology	nontarget
C1galt1c1	wo.orthology	nontarget
C1qbp	w.orthology	nontarget
C1ql1	wo.orthology	nontarget
C1qtnf12	wo.orthology	nontarget
C1qtnf3	wo.orthology	nontarget
C1qtnf4	wo.orthology	nontarget
C1qtnf5	wo.orthology	nontarget
C1qtnf6	wo.orthology	nontarget
C1rl	wo.orthology	nontarget
C2cd2	wo.orthology	nontarget
C2cd2l	wo.orthology	nontarget
C2cd3	wo.orthology	nontarget
C2cd4a	wo.orthology	nontarget
C2cd5	wo.orthology	nontarget
C330007P06Rik	wo.orthology	nontarget
C330018D20Rik	wo.orthology	nontarget
C4a	wo.orthology	nontarget
C530008M17Rik	wo.orthology	nontarget
C5ar2	wo.orthology	nontarget
C77080	wo.orthology	nontarget
C87436	wo.orthology	nontarget
C87977	wo.orthology	nontarget
C8b	wo.orthology	nontarget
C8g	wo.orthology	nontarget
C9orf72	wo.orthology	nontarget
Caap1	wo.orthology	nontarget
Cab39	w.orthology	DAZL.target
Cab39l	w.orthology	DAZL.target
Cabcoco1	wo.orthology	nontarget
Cabin1	wo.orthology	nontarget
Cables1	wo.orthology	nontarget
Cables2	wo.orthology	DAZL.target
Cabyr	wo.orthology	nontarget
Cacfd1	wo.orthology	DAZL.target
Cachd1	wo.orthology	nontarget
Cacna1a	wo.orthology	nontarget
Cacna1b	wo.orthology	nontarget
Cacna1c	wo.orthology	nontarget
Cacna1d	wo.orthology	nontarget
Cacna1h	wo.orthology	nontarget
Cacna2d1	wo.orthology	nontarget
Cacna2d2	wo.orthology	nontarget
Cacna2d3	wo.orthology	nontarget
Cacnb1	wo.orthology	nontarget
Cacnb3	wo.orthology	nontarget
Cacnb4	wo.orthology	nontarget
Cacng4	wo.orthology	nontarget
Cacng6	wo.orthology	nontarget
Cacng7	wo.orthology	nontarget
Cacng8	wo.orthology	nontarget
Cactin	wo.orthology	nontarget
Cacul1	wo.orthology	DAZL.target
Cacybp	wo.orthology	DAZL.target
Cad	w.orthology	DAZL.target
Cadm1	wo.orthology	DAZL.target
Cadm4	wo.orthology	nontarget
Cadps2	wo.orthology	nontarget
Cage1	wo.orthology	nontarget
Calb2	wo.orthology	nontarget
Calcoco1	wo.orthology	nontarget
Calcrl	wo.orthology	nontarget
Cald1	wo.orthology	nontarget
Calm1	wo.orthology	DAZL.target
Calm2	wo.orthology	DAZL.target
Calm3	wo.orthology	DAZL.target
Calml4	wo.orthology	nontarget
Calr	w.orthology	DAZL.target
Calr3	w.orthology	nontarget
Calr4	w.orthology	nontarget
Calu	wo.orthology	DAZL.target
Caly	wo.orthology	nontarget
Camk1d	wo.orthology	nontarget
Camk1g	wo.orthology	nontarget
Camk2a	wo.orthology	nontarget
Camk2b	wo.orthology	nontarget
Camk2d	wo.orthology	nontarget
Camk2g	wo.orthology	DAZL.target
Camk2n1	wo.orthology	nontarget
Camk2n2	wo.orthology	nontarget
Camk4	wo.orthology	nontarget
Camkk1	wo.orthology	nontarget
Camkk2	w.orthology	DAZL.target
Camkmt	wo.orthology	nontarget
Camkv	wo.orthology	nontarget
Caml	wo.orthology	nontarget
Camsap1	wo.orthology	DAZL.target
Camsap2	wo.orthology	DAZL.target
Camsap3	wo.orthology	nontarget
Camta1	wo.orthology	nontarget
Camta2	wo.orthology	nontarget
Cand1	wo.orthology	DAZL.target
Cand2	wo.orthology	DAZL.target
Cant1	wo.orthology	nontarget
Canx	w.orthology	DAZL.target
Cap1	w.orthology	nontarget
Cap2	w.orthology	nontarget
Capg	wo.orthology	nontarget
Capn1	wo.orthology	nontarget
Capn10	wo.orthology	nontarget
Capn15	wo.orthology	nontarget
Capn2	wo.orthology	nontarget
Capn5	wo.orthology	nontarget
Capn6	wo.orthology	nontarget
Capn7	wo.orthology	DAZL.target
Capns1	wo.orthology	nontarget
Capns2	wo.orthology	nontarget
Caprin1	wo.orthology	DAZL.target
Caprin2	wo.orthology	nontarget
Capsl	wo.orthology	nontarget
Capza1	w.orthology	nontarget
Capza2	w.orthology	DAZL.target
Capzb	w.orthology	nontarget
Car10	wo.orthology	nontarget
Car11	wo.orthology	nontarget
Car12	wo.orthology	nontarget
Car15	wo.orthology	nontarget
Car5a	wo.orthology	nontarget
Car5b	wo.orthology	nontarget
Car6	wo.orthology	nontarget
Car7	wo.orthology	nontarget
Car8	wo.orthology	nontarget
Card10	wo.orthology	nontarget
Card19	wo.orthology	nontarget
Card6	wo.orthology	nontarget
Carf	wo.orthology	nontarget
Carhsp1	wo.orthology	nontarget
Carm1	wo.orthology	nontarget
Carmil1	wo.orthology	nontarget
Carmil2	wo.orthology	nontarget
Carmil3	wo.orthology	nontarget
Carnmt1	w.orthology	nontarget
Carns1	w.orthology	nontarget
Cars	w.orthology	nontarget
Cars2	w.orthology	nontarget
Cartpt	wo.orthology	nontarget
Casc1	wo.orthology	nontarget
Casc3	wo.orthology	DAZL.target
Casc4	wo.orthology	DAZL.target
Casd1	wo.orthology	nontarget
Cask	wo.orthology	nontarget
Caskin1	wo.orthology	nontarget
Caskin2	wo.orthology	nontarget
Casp2	wo.orthology	DAZL.target
Casp3	wo.orthology	nontarget
Casp6	wo.orthology	nontarget
Casp7	wo.orthology	DAZL.target
Casp8ap2	wo.orthology	nontarget
Casp9	wo.orthology	DAZL.target
Casq1	wo.orthology	nontarget
Casq2	wo.orthology	nontarget
Cass4	wo.orthology	nontarget
Cast	wo.orthology	nontarget
Castor1	wo.orthology	nontarget
Castor2	wo.orthology	nontarget
Casz1	wo.orthology	nontarget
Cat	w.orthology	nontarget
Catip	wo.orthology	nontarget
Catsper2	wo.orthology	nontarget
Catsperd	wo.orthology	nontarget
Catspere2	wo.orthology	nontarget
Catsperg1	wo.orthology	nontarget
Cavin1	wo.orthology	nontarget
Cavin3	wo.orthology	nontarget
Cavin4	wo.orthology	nontarget
Cbfa2t2	wo.orthology	nontarget
Cbfb	wo.orthology	DAZL.target
Cbl	wo.orthology	DAZL.target
Cblb	wo.orthology	DAZL.target
Cbll1	wo.orthology	DAZL.target
Cbln1	wo.orthology	nontarget
Cbln2	wo.orthology	nontarget
Cbln3	wo.orthology	nontarget
Cbr1	w.orthology	nontarget
Cbr3	w.orthology	nontarget
Cbr4	wo.orthology	nontarget
Cbx1	wo.orthology	nontarget
Cbx2	wo.orthology	DAZL.target
Cbx3	wo.orthology	DAZL.target
Cbx4	wo.orthology	nontarget
Cbx5	wo.orthology	nontarget
Cbx6	wo.orthology	nontarget
Cbx7	wo.orthology	nontarget
Cbx8	wo.orthology	DAZL.target
Cby1	wo.orthology	nontarget
Cc2d1a	wo.orthology	nontarget
Cc2d1b	wo.orthology	nontarget
Cc2d2a	wo.orthology	nontarget
Ccar1	wo.orthology	DAZL.target
Ccar2	wo.orthology	nontarget
Ccbe1	wo.orthology	nontarget
Ccdc102a	wo.orthology	nontarget
Ccdc106	wo.orthology	nontarget
Ccdc107	wo.orthology	nontarget
Ccdc112	wo.orthology	DAZL.target
Ccdc113	wo.orthology	nontarget
Ccdc114	wo.orthology	nontarget
Ccdc115	wo.orthology	nontarget
Ccdc116	wo.orthology	nontarget
Ccdc117	wo.orthology	DAZL.target
Ccdc12	wo.orthology	DAZL.target
Ccdc120	wo.orthology	nontarget
Ccdc122	w.orthology	nontarget
Ccdc124	wo.orthology	nontarget
Ccdc125	wo.orthology	nontarget
Ccdc126	wo.orthology	nontarget
Ccdc127	wo.orthology	DAZL.target
Ccdc13	wo.orthology	nontarget
Ccdc130	w.orthology	nontarget
Ccdc134	wo.orthology	nontarget
Ccdc136	wo.orthology	nontarget
Ccdc137	wo.orthology	nontarget
Ccdc138	wo.orthology	DAZL.target
Ccdc14	wo.orthology	nontarget
Ccdc141	wo.orthology	nontarget
Ccdc142	wo.orthology	nontarget
Ccdc144b	wo.orthology	nontarget
Ccdc148	wo.orthology	nontarget
Ccdc15	wo.orthology	nontarget
Ccdc150	wo.orthology	nontarget
Ccdc151	wo.orthology	nontarget
Ccdc152	wo.orthology	nontarget
Ccdc155	wo.orthology	nontarget
Ccdc157	w.orthology	nontarget
Ccdc158	wo.orthology	nontarget
Ccdc159	wo.orthology	nontarget
Ccdc162	wo.orthology	nontarget
Ccdc163	wo.orthology	nontarget
Ccdc166	wo.orthology	nontarget
Ccdc167	wo.orthology	nontarget
Ccdc17	wo.orthology	nontarget
Ccdc170	wo.orthology	nontarget
Ccdc171	wo.orthology	nontarget
Ccdc172	wo.orthology	nontarget
Ccdc173	wo.orthology	nontarget
Ccdc174	wo.orthology	nontarget
Ccdc175	wo.orthology	DAZL.target
Ccdc177	wo.orthology	nontarget
Ccdc18	wo.orthology	nontarget
Ccdc180	wo.orthology	nontarget
Ccdc181	wo.orthology	nontarget
Ccdc182	wo.orthology	nontarget
Ccdc183	wo.orthology	nontarget
Ccdc186	wo.orthology	nontarget
Ccdc189	wo.orthology	nontarget
Ccdc191	wo.orthology	nontarget
Ccdc22	wo.orthology	nontarget
Ccdc24	wo.orthology	nontarget
Ccdc25	w.orthology	DAZL.target
Ccdc28a	wo.orthology	nontarget
Ccdc28b	wo.orthology	nontarget
Ccdc3	wo.orthology	nontarget
Ccdc30	wo.orthology	nontarget
Ccdc32	wo.orthology	nontarget
Ccdc34	wo.orthology	nontarget
Ccdc36	wo.orthology	nontarget
Ccdc38	wo.orthology	nontarget
Ccdc39	wo.orthology	nontarget
Ccdc40	wo.orthology	nontarget
Ccdc43	wo.orthology	DAZL.target
Ccdc47	w.orthology	nontarget
Ccdc50	wo.orthology	nontarget
Ccdc51	wo.orthology	nontarget
Ccdc57	wo.orthology	nontarget
Ccdc58	wo.orthology	nontarget
Ccdc59	wo.orthology	nontarget
Ccdc6	wo.orthology	DAZL.target
Ccdc60	wo.orthology	nontarget
Ccdc61	wo.orthology	nontarget
Ccdc62	wo.orthology	nontarget
Ccdc65	wo.orthology	nontarget
Ccdc66	wo.orthology	nontarget
Ccdc69	wo.orthology	nontarget
Ccdc71	wo.orthology	nontarget
Ccdc71l	wo.orthology	DAZL.target
Ccdc73	wo.orthology	DAZL.target
Ccdc74a	wo.orthology	nontarget
Ccdc77	wo.orthology	nontarget
Ccdc78	wo.orthology	nontarget
Ccdc8	wo.orthology	nontarget
Ccdc82	wo.orthology	nontarget
Ccdc84	wo.orthology	nontarget
Ccdc85b	wo.orthology	nontarget
Ccdc85c	wo.orthology	nontarget
Ccdc86	wo.orthology	nontarget
Ccdc88a	wo.orthology	nontarget
Ccdc88c	wo.orthology	nontarget
Ccdc9	wo.orthology	nontarget
Ccdc90b	wo.orthology	nontarget
Ccdc91	wo.orthology	nontarget
Ccdc92	wo.orthology	nontarget
Ccdc92b	wo.orthology	nontarget
Ccdc93	wo.orthology	nontarget
Ccdc97	wo.orthology	nontarget
Cchcr1	wo.orthology	nontarget
Ccl25	wo.orthology	nontarget
Ccl27a	wo.orthology	nontarget
Ccl28	wo.orthology	nontarget
Ccl9	wo.orthology	nontarget
Ccm2	wo.orthology	nontarget
Ccna1	w.orthology	nontarget
Ccna2	w.orthology	nontarget
Ccnb1	w.orthology	nontarget
Ccnb1ip1	wo.orthology	nontarget
Ccnb2	w.orthology	nontarget
Ccnb3	w.orthology	nontarget
Ccnc	wo.orthology	DAZL.target
Ccnd1	w.orthology	DAZL.target
Ccnd2	w.orthology	DAZL.target
Ccnd3	w.orthology	nontarget
Ccndbp1	wo.orthology	nontarget
Ccne1	w.orthology	nontarget
Ccne2	w.orthology	nontarget
Ccnf	w.orthology	nontarget
Ccng1	w.orthology	DAZL.target
Ccng2	w.orthology	nontarget
Ccnh	w.orthology	nontarget
Ccni	w.orthology	DAZL.target
Ccnj	w.orthology	nontarget
Ccnjl	w.orthology	DAZL.target
Ccnk	wo.orthology	DAZL.target
Ccnl1	w.orthology	DAZL.target
Ccnl2	w.orthology	DAZL.target
Ccno	w.orthology	nontarget
Ccnt1	w.orthology	nontarget
Ccnt2	wo.orthology	nontarget
Ccny	w.orthology	DAZL.target
Ccnyl1	w.orthology	nontarget
Ccp110	wo.orthology	DAZL.target
Ccpg1	wo.orthology	DAZL.target
Ccpg1os	wo.orthology	nontarget
Ccr2	wo.orthology	nontarget
Ccr4	wo.orthology	nontarget
Ccr9	wo.orthology	nontarget
Ccrl2	wo.orthology	nontarget
Ccs	w.orthology	nontarget
Ccsap	wo.orthology	nontarget
Ccser2	wo.orthology	nontarget
Cct2	w.orthology	DAZL.target
Cct3	w.orthology	DAZL.target
Cct4	w.orthology	DAZL.target
Cct5	w.orthology	nontarget
Cct6a	wo.orthology	DAZL.target
Cct6b	wo.orthology	nontarget
Cct7	w.orthology	DAZL.target
Cct8	w.orthology	DAZL.target
Ccz1	wo.orthology	nontarget
Cd109	wo.orthology	nontarget
Cd151	wo.orthology	nontarget
Cd160	wo.orthology	nontarget
Cd164	wo.orthology	DAZL.target
Cd164l2	wo.orthology	nontarget
Cd1d1	wo.orthology	nontarget
Cd2	wo.orthology	nontarget
Cd200	wo.orthology	nontarget
Cd200r2	wo.orthology	nontarget
Cd209c	wo.orthology	nontarget
Cd22	wo.orthology	nontarget
Cd24a	wo.orthology	DAZL.target
Cd27	wo.orthology	nontarget
Cd274	wo.orthology	nontarget
Cd276	wo.orthology	nontarget
Cd2ap	wo.orthology	nontarget
Cd2bp2	wo.orthology	nontarget
Cd300lg	wo.orthology	nontarget
Cd302	wo.orthology	nontarget
Cd320	wo.orthology	nontarget
Cd34	wo.orthology	nontarget
Cd38	wo.orthology	nontarget
Cd3d	wo.orthology	nontarget
Cd3eap	wo.orthology	nontarget
Cd46	wo.orthology	nontarget
Cd47	wo.orthology	nontarget
Cd55	wo.orthology	nontarget
Cd59a	wo.orthology	nontarget
Cd5l	wo.orthology	nontarget
Cd63	wo.orthology	nontarget
Cd68	wo.orthology	nontarget
Cd7	wo.orthology	nontarget
Cd70	wo.orthology	nontarget
Cd79a	wo.orthology	nontarget
Cd80	wo.orthology	nontarget
Cd81	wo.orthology	nontarget
Cd82	wo.orthology	nontarget
Cd84	wo.orthology	nontarget
Cd8a	wo.orthology	nontarget
Cd8b1	wo.orthology	nontarget
Cd9	wo.orthology	DAZL.target
Cd93	wo.orthology	nontarget
Cd99l2	wo.orthology	nontarget
Cda	wo.orthology	nontarget
Cdadc1	w.orthology	nontarget
Cdan1	wo.orthology	nontarget
Cdc123	w.orthology	nontarget
Cdc14a	wo.orthology	nontarget
Cdc14b	wo.orthology	nontarget
Cdc16	w.orthology	nontarget
Cdc20	w.orthology	DAZL.target
Cdc20b	w.orthology	nontarget
Cdc23	w.orthology	DAZL.target
Cdc25a	w.orthology	DAZL.target
Cdc25b	w.orthology	nontarget
Cdc25c	w.orthology	nontarget
Cdc26	wo.orthology	nontarget
Cdc27	w.orthology	DAZL.target
Cdc34	wo.orthology	nontarget
Cdc37	w.orthology	nontarget
Cdc37l1	w.orthology	DAZL.target
Cdc40	w.orthology	DAZL.target
Cdc42	w.orthology	DAZL.target
Cdc42bpa	wo.orthology	DAZL.target
Cdc42bpb	wo.orthology	DAZL.target
Cdc42bpg	wo.orthology	nontarget
Cdc42ep1	wo.orthology	nontarget
Cdc42ep2	wo.orthology	nontarget
Cdc42ep3	wo.orthology	nontarget
Cdc42ep4	wo.orthology	DAZL.target
Cdc42ep5	wo.orthology	nontarget
Cdc42se1	wo.orthology	nontarget
Cdc42se2	wo.orthology	DAZL.target
Cdc45	w.orthology	nontarget
Cdc5l	w.orthology	DAZL.target
Cdc6	w.orthology	nontarget
Cdc7	w.orthology	DAZL.target
Cdc73	w.orthology	DAZL.target
Cdca2	wo.orthology	nontarget
Cdca3	wo.orthology	nontarget
Cdca4	wo.orthology	DAZL.target
Cdca5	wo.orthology	nontarget
Cdca7	wo.orthology	DAZL.target
Cdca7l	wo.orthology	DAZL.target
Cdca8	wo.orthology	DAZL.target
Cdh1	wo.orthology	nontarget
Cdh15	wo.orthology	nontarget
Cdh18	wo.orthology	nontarget
Cdh2	wo.orthology	nontarget
Cdh20	wo.orthology	nontarget
Cdh23	wo.orthology	nontarget
Cdh24	wo.orthology	nontarget
Cdh3	wo.orthology	nontarget
Cdh4	wo.orthology	nontarget
Cdh5	wo.orthology	nontarget
Cdip1	wo.orthology	nontarget
Cdipt	w.orthology	nontarget
Cdiptos	wo.orthology	nontarget
Cdk1	w.orthology	nontarget
Cdk10	wo.orthology	nontarget
Cdk11b	wo.orthology	nontarget
Cdk12	wo.orthology	nontarget
Cdk13	wo.orthology	DAZL.target
Cdk14	wo.orthology	nontarget
Cdk16	wo.orthology	nontarget
Cdk17	wo.orthology	DAZL.target
Cdk18	wo.orthology	nontarget
Cdk19	wo.orthology	nontarget
Cdk2	wo.orthology	DAZL.target
Cdk20	wo.orthology	nontarget
Cdk2ap1	wo.orthology	nontarget
Cdk2ap2	wo.orthology	nontarget
Cdk4	wo.orthology	nontarget
Cdk5	wo.orthology	nontarget
Cdk5r1	wo.orthology	nontarget
Cdk5rap1	wo.orthology	nontarget
Cdk5rap2	wo.orthology	nontarget
Cdk5rap3	wo.orthology	nontarget
Cdk6	wo.orthology	DAZL.target
Cdk7	w.orthology	nontarget
Cdk8	wo.orthology	DAZL.target
Cdk9	w.orthology	DAZL.target
[truncated: 11,498 more rows]

## Sheet: Mouse-yeast orthologs
gene.id	Gene.stable.ID	Saccharomyces.cerevisiae.gene.stable.ID	Saccharomyces.cerevisiae.gene.name	Saccharomyces.cerevisiae.homology.type	X.id..target.Saccharomyces.cerevisiae.gene.identical.to.query.gene	X.id..query.gene.identical.to.target.Saccharomyces.cerevisiae.gene	Saccharomyces.cerevisiae.Gene.order.conservation.score	Saccharomyces.cerevisiae.Whole.genome.alignment.coverage	Saccharomyces.cerevisiae.orthology.confidence..0.low..1.high.	orthology	DAZL_status
0610009B22Rik	ENSMUSG00000007777				NA	NA	NA	NA	NA	wo.orthology	nontarget
0610010F05Rik	ENSMUSG00000042208				NA	NA	NA	NA	NA	wo.orthology	nontarget
0610010K14Rik	ENSMUSG00000020831				NA	NA	NA	NA	NA	wo.orthology	nontarget
0610030E20Rik	ENSMUSG00000108680				NA	NA	NA	NA	NA	wo.orthology	nontarget
0610030E20Rik	ENSMUSG00000058706				NA	NA	NA	NA	NA	wo.orthology	nontarget
1110004F10Rik	ENSMUSG00000030663				NA	NA	NA	NA	NA	wo.orthology	DAZL.target
1110008P14Rik	ENSMUSG00000039195				NA	NA	NA	NA	NA	wo.orthology	nontarget
1110012L19Rik	ENSMUSG00000045237				NA	NA	NA	NA	NA	wo.orthology	nontarget
1110032A03Rik	ENSMUSG00000037971				NA	NA	NA	NA	NA	wo.orthology	nontarget
1110032F04Rik	ENSMUSG00000046999				NA	NA	NA	NA	NA	wo.orthology	nontarget
1110038F14Rik	ENSMUSG00000063236				NA	NA	NA	NA	NA	wo.orthology	DAZL.target
1110051M20Rik	ENSMUSG00000040591				NA	NA	NA	NA	NA	wo.orthology	nontarget
1110059E24Rik	ENSMUSG00000035171				NA	NA	NA	NA	NA	wo.orthology	nontarget
1110059G10Rik	ENSMUSG00000032551				NA	NA	NA	NA	NA	wo.orthology	nontarget
1110065P20Rik	ENSMUSG00000078570				NA	NA	NA	NA	NA	wo.orthology	DAZL.target
1190007I07Rik	ENSMUSG00000063320				NA	NA	NA	NA	NA	wo.orthology	nontarget
1300017J02Rik	ENSMUSG00000033688				NA	NA	NA	NA	NA	wo.orthology	nontarget
1500009L16Rik	ENSMUSG00000087651				NA	NA	NA	NA	NA	wo.orthology	nontarget
1600002K03Rik	ENSMUSG00000035595				NA	NA	NA	NA	NA	wo.orthology	nontarget
1600012H06Rik	ENSMUSG00000050088				NA	NA	NA	NA	NA	wo.orthology	nontarget
1600014C10Rik	ENSMUSG00000054676				NA	NA	NA	NA	NA	wo.orthology	nontarget
1700001C19Rik	ENSMUSG00000047150				NA	NA	NA	NA	NA	wo.orthology	nontarget
1700001C19Rik	ENSMUSG00000116001				NA	NA	NA	NA	NA	wo.orthology	nontarget
1700001J03Rik	ENSMUSG00000095040				NA	NA	NA	NA	NA	wo.orthology	nontarget
1700001L19Rik	ENSMUSG00000021534				NA	NA	NA	NA	NA	wo.orthology	nontarget
1700003E16Rik	ENSMUSG00000030030				NA	NA	NA	NA	NA	wo.orthology	nontarget
1700007K13Rik	ENSMUSG00000026831				NA	NA	NA	NA	NA	wo.orthology	nontarget
1700008O03Rik	ENSMUSG00000008028				NA	NA	NA	NA	NA	wo.orthology	nontarget
1700010D01Rik	ENSMUSG00000071721				NA	NA	NA	NA	NA	wo.orthology	nontarget
1700010I14Rik	ENSMUSG00000023873				NA	NA	NA	NA	NA	wo.orthology	nontarget
1700012B07Rik	ENSMUSG00000020617				NA	NA	NA	NA	NA	wo.orthology	nontarget
1700013F07Rik	ENSMUSG00000027886				NA	NA	NA	NA	NA	wo.orthology	nontarget
1700013H16Rik	ENSMUSG00000054727				NA	NA	NA	NA	NA	wo.orthology	nontarget
1700015F17Rik	ENSMUSG00000079666				NA	NA	NA	NA	NA	wo.orthology	nontarget
1700016D06Rik	ENSMUSG00000031509				NA	NA	NA	NA	NA	wo.orthology	nontarget
1700016K19Rik	ENSMUSG00000053783				NA	NA	NA	NA	NA	wo.orthology	nontarget
1700017B05Rik	ENSMUSG00000032300				NA	NA	NA	NA	NA	wo.orthology	nontarget
1700018B08Rik	ENSMUSG00000031809				NA	NA	NA	NA	NA	wo.orthology	nontarget
1700019A02Rik	ENSMUSG00000060715				NA	NA	NA	NA	NA	wo.orthology	nontarget
1700020A23Rik	ENSMUSG00000027409				NA	NA	NA	NA	NA	wo.orthology	nontarget
1700020D05Rik	ENSMUSG00000100937				NA	NA	NA	NA	NA	wo.orthology	nontarget
1700021F05Rik	ENSMUSG00000019797				NA	NA	NA	NA	NA	wo.orthology	nontarget
1700021F07Rik	ENSMUSG00000027518				NA	NA	NA	NA	NA	wo.orthology	nontarget
1700024G13Rik	ENSMUSG00000072473				NA	NA	NA	NA	NA	wo.orthology	nontarget
1700025G04Rik	ENSMUSG00000032666				NA	NA	NA	NA	NA	wo.orthology	nontarget
1700028K03Rik	ENSMUSG00000089798				NA	NA	NA	NA	NA	wo.orthology	nontarget
1700029H14Rik	ENSMUSG00000031452				NA	NA	NA	NA	NA	wo.orthology	nontarget
1700029J07Rik	ENSMUSG00000071103				NA	NA	NA	NA	NA	wo.orthology	nontarget
1700029P11Rik	ENSMUSG00000061633				NA	NA	NA	NA	NA	wo.orthology	nontarget
1700030J22Rik	ENSMUSG00000031847				NA	NA	NA	NA	NA	wo.orthology	nontarget
1700030K09Rik	ENSMUSG00000052794				NA	NA	NA	NA	NA	wo.orthology	DAZL.target
1700034J05Rik	ENSMUSG00000040163				NA	NA	NA	NA	NA	wo.orthology	nontarget
1700037C18Rik	ENSMUSG00000005983				NA	NA	NA	NA	NA	wo.orthology	nontarget
1700037H04Rik	ENSMUSG00000027327				NA	NA	NA	NA	NA	wo.orthology	nontarget
1700047I17Rik2	ENSMUSG00000094103				NA	NA	NA	NA	NA	wo.orthology	nontarget
1700049E17Rik1	ENSMUSG00000079271				NA	NA	NA	NA	NA	wo.orthology	nontarget
1700049E17Rik2	ENSMUSG00000090440				NA	NA	NA	NA	NA	wo.orthology	nontarget
1700056E22Rik	ENSMUSG00000044854				NA	NA	NA	NA	NA	wo.orthology	nontarget
1700065D16Rik	ENSMUSG00000096655				NA	NA	NA	NA	NA	wo.orthology	nontarget
1700066C05Rik	ENSMUSG00000101810				NA	NA	NA	NA	NA	wo.orthology	nontarget
1700066M21Rik	ENSMUSG00000038323				NA	NA	NA	NA	NA	wo.orthology	DAZL.target
1700067K01Rik	ENSMUSG00000046408				NA	NA	NA	NA	NA	wo.orthology	nontarget
1700080O16Rik	ENSMUSG00000031118				NA	NA	NA	NA	NA	wo.orthology	nontarget
1700094D03Rik	ENSMUSG00000118506				NA	NA	NA	NA	NA	wo.orthology	nontarget
1700102P08Rik	ENSMUSG00000032611				NA	NA	NA	NA	NA	wo.orthology	nontarget
1700109H08Rik	ENSMUSG00000008307				NA	NA	NA	NA	NA	wo.orthology	nontarget
1700123O20Rik	ENSMUSG00000040822				NA	NA	NA	NA	NA	wo.orthology	nontarget
1700125H20Rik	ENSMUSG00000018479				NA	NA	NA	NA	NA	wo.orthology	nontarget
1810009A15Rik	ENSMUSG00000071653				NA	NA	NA	NA	NA	wo.orthology	nontarget
1810010H24Rik	ENSMUSG00000078607				NA	NA	NA	NA	NA	wo.orthology	nontarget
1810013L24Rik	ENSMUSG00000022507				NA	NA	NA	NA	NA	wo.orthology	DAZL.target
1810024B03Rik	ENSMUSG00000044145	YPL150W		ortholog_one2many	26.5	5.88235	NA	NA	0	w.orthology	nontarget
1810030O07Rik	ENSMUSG00000044148				NA	NA	NA	NA	NA	wo.orthology	nontarget
1810037I17Rik	ENSMUSG00000054091				NA	NA	NA	NA	NA	wo.orthology	nontarget
1810055G02Rik	ENSMUSG00000035372				NA	NA	NA	NA	NA	wo.orthology	nontarget
2010003K11Rik	ENSMUSG00000042041				NA	NA	NA	NA	NA	wo.orthology	nontarget
2010109A12Rik	ENSMUSG00000029384				NA	NA	NA	NA	NA	wo.orthology	nontarget
2010300C02Rik	ENSMUSG00000026090				NA	NA	NA	NA	NA	wo.orthology	DAZL.target
2010315B03Rik	ENSMUSG00000098810				NA	NA	NA	NA	NA	wo.orthology	nontarget
2010315B03Rik	ENSMUSG00000074829				NA	NA	NA	NA	NA	wo.orthology	nontarget
2200002D01Rik	ENSMUSG00000030587				NA	NA	NA	NA	NA	wo.orthology	nontarget
2210010C04Rik	ENSMUSG00000029882				NA	NA	NA	NA	NA	wo.orthology	nontarget
2210011C24Rik	ENSMUSG00000074217				NA	NA	NA	NA	NA	wo.orthology	nontarget
2210016F16Rik	ENSMUSG00000021550				NA	NA	NA	NA	NA	wo.orthology	nontarget
2210016L21Rik	ENSMUSG00000029559				NA	NA	NA	NA	NA	wo.orthology	nontarget
2210408I21Rik	ENSMUSG00000071252				NA	NA	NA	NA	NA	wo.orthology	nontarget
2210418O10Rik	ENSMUSG00000078894				NA	NA	NA	NA	NA	wo.orthology	nontarget
2300009A05Rik	ENSMUSG00000032403				NA	NA	NA	NA	NA	wo.orthology	nontarget
2310009A05Rik	ENSMUSG00000098332				NA	NA	NA	NA	NA	wo.orthology	nontarget
2310009B15Rik	ENSMUSG00000079283				NA	NA	NA	NA	NA	wo.orthology	nontarget
2310011J03Rik	ENSMUSG00000020133				NA	NA	NA	NA	NA	wo.orthology	nontarget
2310022A10Rik	ENSMUSG00000049643				NA	NA	NA	NA	NA	wo.orthology	nontarget
2310022B05Rik	ENSMUSG00000031983				NA	NA	NA	NA	NA	wo.orthology	nontarget
2310030G06Rik	ENSMUSG00000032062				NA	NA	NA	NA	NA	wo.orthology	nontarget
2310033P09Rik	ENSMUSG00000020441				NA	NA	NA	NA	NA	wo.orthology	nontarget
2310039H08Rik	ENSMUSG00000062619				NA	NA	NA	NA	NA	wo.orthology	nontarget
2310057M21Rik	ENSMUSG00000040177				NA	NA	NA	NA	NA	wo.orthology	DAZL.target
2310061I04Rik	ENSMUSG00000050705				NA	NA	NA	NA	NA	wo.orthology	nontarget
2410002F23Rik	ENSMUSG00000045411				NA	NA	NA	NA	NA	wo.orthology	nontarget
2410004B18Rik	ENSMUSG00000036873				NA	NA	NA	NA	NA	wo.orthology	nontarget
2410004P03Rik	ENSMUSG00000071398				NA	NA	NA	NA	NA	wo.orthology	nontarget
2410131K14Rik	ENSMUSG00000032840				NA	NA	NA	NA	NA	wo.orthology	nontarget
2410141K09Rik	ENSMUSG00000074832				NA	NA	NA	NA	NA	wo.orthology	nontarget
2510002D24Rik	ENSMUSG00000071632				NA	NA	NA	NA	NA	wo.orthology	nontarget
2510009E07Rik	ENSMUSG00000043391				NA	NA	NA	NA	NA	wo.orthology	nontarget
2510039O18Rik	ENSMUSG00000044496				NA	NA	NA	NA	NA	wo.orthology	DAZL.target
2610001J05Rik	ENSMUSG00000052419				NA	NA	NA	NA	NA	wo.orthology	DAZL.target
2610002M06Rik	ENSMUSG00000031242	YKR035W-A	DID2	ortholog_one2many	43.7186	42.6471	NA	NA	1	w.orthology	nontarget
2610008E11Rik	ENSMUSG00000060301				NA	NA	NA	NA	NA	wo.orthology	nontarget
2610042L04Rik	ENSMUSG00000079388				NA	NA	NA	NA	NA	wo.orthology	nontarget
2610044O15Rik8	ENSMUSG00000071302				NA	NA	NA	NA	NA	wo.orthology	nontarget
2610301B20Rik	ENSMUSG00000059482				NA	NA	NA	NA	NA	wo.orthology	DAZL.target
2610318N02Rik	ENSMUSG00000049916				NA	NA	NA	NA	NA	wo.orthology	nontarget
2610507B11Rik	ENSMUSG00000010277	YLR454W		ortholog_one2many	10.7431	9.13242	NA	NA	0	w.orthology	nontarget
2610507B11Rik	ENSMUSG00000010277	YPR117W		ortholog_one2many	16.2041	14.544	NA	NA	0	w.orthology	nontarget
2700049A03Rik	ENSMUSG00000034601				NA	NA	NA	NA	NA	wo.orthology	nontarget
2700062C07Rik	ENSMUSG00000024273				NA	NA	NA	NA	NA	wo.orthology	nontarget
2700081O15Rik	ENSMUSG00000053080				NA	NA	NA	NA	NA	wo.orthology	nontarget
2700097O09Rik	ENSMUSG00000062198	YHR209W		ortholog_many2many	8.63787	8.93471	NA	NA	0	w.orthology	nontarget
2700097O09Rik	ENSMUSG00000062198	YDR316W		ortholog_many2many	12.6246	8.06794	NA	NA	0	w.orthology	nontarget
2700097O09Rik	ENSMUSG00000062198	YER175C	TMT1	ortholog_many2many	8.9701	9.0301	NA	NA	0	w.orthology	nontarget
2810004N23Rik	ENSMUSG00000031984				NA	NA	NA	NA	NA	wo.orthology	nontarget
2810006K23Rik	ENSMUSG00000047635				NA	NA	NA	NA	NA	wo.orthology	nontarget
2810021J22Rik	ENSMUSG00000020491				NA	NA	NA	NA	NA	wo.orthology	nontarget
2810408A11Rik	ENSMUSG00000018570				NA	NA	NA	NA	NA	wo.orthology	nontarget
2810459M11Rik	ENSMUSG00000026227				NA	NA	NA	NA	NA	wo.orthology	nontarget
2900026A02Rik	ENSMUSG00000051339				NA	NA	NA	NA	NA	wo.orthology	nontarget
3110009E18Rik	ENSMUSG00000026388	YKR074W		ortholog_one2one	36.5079	29.6774	NA	NA	1	w.orthology	nontarget
3110040N11Rik	ENSMUSG00000025102				NA	NA	NA	NA	NA	wo.orthology	nontarget
3110082I17Rik	ENSMUSG00000053553				NA	NA	NA	NA	NA	wo.orthology	nontarget
3110082J24Rik	ENSMUSG00000086815				NA	NA	NA	NA	NA	wo.orthology	nontarget
3300002I08Rik	ENSMUSG00000063364				NA	NA	NA	NA	NA	wo.orthology	nontarget
3830403N18Rik	ENSMUSG00000031125				NA	NA	NA	NA	NA	wo.orthology	nontarget
3830406C13Rik	ENSMUSG00000033111				NA	NA	NA	NA	NA	wo.orthology	nontarget
3830417A13Rik	ENSMUSG00000031179				NA	NA	NA	NA	NA	wo.orthology	nontarget
4833420G17Rik	ENSMUSG00000062822				NA	NA	NA	NA	NA	wo.orthology	DAZL.target
4833427G06Rik	ENSMUSG00000032057				NA	NA	NA	NA	NA	wo.orthology	nontarget
4833439L19Rik	ENSMUSG00000025871				NA	NA	NA	NA	NA	wo.orthology	DAZL.target
4921507P07Rik	ENSMUSG00000029828				NA	NA	NA	NA	NA	wo.orthology	nontarget
4921524J17Rik	ENSMUSG00000036934				NA	NA	NA	NA	NA	wo.orthology	nontarget
4921536K21Rik	ENSMUSG00000020434				NA	NA	NA	NA	NA	wo.orthology	nontarget
4930402H24Rik	ENSMUSG00000027309				NA	NA	NA	NA	NA	wo.orthology	nontarget
4930430F08Rik	ENSMUSG00000046567				NA	NA	NA	NA	NA	wo.orthology	nontarget
4930432K21Rik	ENSMUSG00000008129				NA	NA	NA	NA	NA	wo.orthology	nontarget
4930433I11Rik	ENSMUSG00000091692				NA	NA	NA	NA	NA	wo.orthology	nontarget
4930444P10Rik	ENSMUSG00000067795				NA	NA	NA	NA	NA	wo.orthology	nontarget
4930447C04Rik	ENSMUSG00000021098				NA	NA	NA	NA	NA	wo.orthology	nontarget
4930452B06Rik	ENSMUSG00000021747				NA	NA	NA	NA	NA	wo.orthology	DAZL.target
4930453N24Rik	ENSMUSG00000059920				NA	NA	NA	NA	NA	wo.orthology	nontarget
4930467E23Rik	ENSMUSG00000096265				NA	NA	NA	NA	NA	wo.orthology	nontarget
4930502E18Rik	ENSMUSG00000055555	YLR430W	SEN1	ortholog_many2many	10.5932	1.12057	NA	NA	0	w.orthology	nontarget
4930502E18Rik	ENSMUSG00000055555	YHR164C	DNA2	ortholog_many2many	11.4407	1.77398	NA	NA	0	w.orthology	nontarget
4930503B20Rik	ENSMUSG00000090202	YMR161W		ortholog_many2many	20.9402	21.875	NA	NA	0	w.orthology	nontarget
4930503B20Rik	ENSMUSG00000090202	YNL007C		ortholog_many2many	21.3675	14.2045	NA	NA	0	w.orthology	nontarget
4930503E14Rik	ENSMUSG00000072595				NA	NA	NA	NA	NA	wo.orthology	nontarget
4930503L19Rik	ENSMUSG00000044906				NA	NA	NA	NA	NA	wo.orthology	nontarget
4930505A04Rik	ENSMUSG00000040919				NA	NA	NA	NA	NA	wo.orthology	nontarget
4930512M02Rik	ENSMUSG00000062511				NA	NA	NA	NA	NA	wo.orthology	nontarget
4930519L02Rik	ENSMUSG00000105652				NA	NA	NA	NA	NA	wo.orthology	nontarget
4930539E08Rik	ENSMUSG00000048905				NA	NA	NA	NA	NA	wo.orthology	nontarget
4930550C14Rik	ENSMUSG00000005131				NA	NA	NA	NA	NA	wo.orthology	nontarget
4930550L24Rik	ENSMUSG00000046180				NA	NA	NA	NA	NA	wo.orthology	DAZL.target
4930558K02Rik	ENSMUSG00000086277				NA	NA	NA	NA	NA	wo.orthology	nontarget
4930563E22Rik	ENSMUSG00000053574				NA	NA	NA	NA	NA	wo.orthology	nontarget
4930564C03Rik	ENSMUSG00000117326				NA	NA	NA	NA	NA	wo.orthology	nontarget
4930579G24Rik	ENSMUSG00000027811				NA	NA	NA	NA	NA	wo.orthology	DAZL.target
4930591A17Rik	ENSMUSG00000039138				NA	NA	NA	NA	NA	wo.orthology	nontarget
4931406B18Rik	ENSMUSG00000013353				NA	NA	NA	NA	NA	wo.orthology	nontarget
4931406C07Rik	ENSMUSG00000031938				NA	NA	NA	NA	NA	wo.orthology	nontarget
4931406P16Rik	ENSMUSG00000066571				NA	NA	NA	NA	NA	wo.orthology	DAZL.target
4931414P19Rik	ENSMUSG00000022179				NA	NA	NA	NA	NA	wo.orthology	nontarget
4931422A03Rik	ENSMUSG00000046085				NA	NA	NA	NA	NA	wo.orthology	nontarget
4931428F04Rik	ENSMUSG00000014837				NA	NA	NA	NA	NA	wo.orthology	DAZL.target
4932438A13Rik	ENSMUSG00000037270				NA	NA	NA	NA	NA	wo.orthology	DAZL.target
4933402E13Rik	ENSMUSG00000045330				NA	NA	NA	NA	NA	wo.orthology	nontarget
4933402J07Rik	ENSMUSG00000069971				NA	NA	NA	NA	NA	wo.orthology	nontarget
4933403O08Rik	ENSMUSG00000079460				NA	NA	NA	NA	NA	wo.orthology	nontarget
4933406M09Rik	ENSMUSG00000050526				NA	NA	NA	NA	NA	wo.orthology	nontarget
4933412E24Rik	ENSMUSG00000071749				NA	NA	NA	NA	NA	wo.orthology	nontarget
4933425L06Rik	ENSMUSG00000021718	YHR202W		ortholog_one2many	11.453	11.1296	NA	NA	0	w.orthology	DAZL.target
4933427D14Rik	ENSMUSG00000020807				NA	NA	NA	NA	NA	wo.orthology	nontarget
4933428M09Rik	ENSMUSG00000042525				NA	NA	NA	NA	NA	wo.orthology	nontarget
4933430I17Rik	ENSMUSG00000058046				NA	NA	NA	NA	NA	wo.orthology	nontarget
4933434E20Rik	ENSMUSG00000027942				NA	NA	NA	NA	NA	wo.orthology	nontarget
5031410I06Rik	ENSMUSG00000051940				NA	NA	NA	NA	NA	wo.orthology	nontarget
5031439G07Rik	ENSMUSG00000036046				NA	NA	NA	NA	NA	wo.orthology	DAZL.target
5330417C22Rik	ENSMUSG00000040412				NA	NA	NA	NA	NA	wo.orthology	nontarget
5730409E04Rik	ENSMUSG00000073755				NA	NA	NA	NA	NA	wo.orthology	nontarget
5730455P16Rik	ENSMUSG00000057181				NA	NA	NA	NA	NA	wo.orthology	nontarget
5730507C01Rik	ENSMUSG00000073197				NA	NA	NA	NA	NA	wo.orthology	nontarget
6030458C11Rik	ENSMUSG00000022195				NA	NA	NA	NA	NA	wo.orthology	nontarget
6330403K07Rik	ENSMUSG00000018451				NA	NA	NA	NA	NA	wo.orthology	nontarget
6330409D20Rik	ENSMUSG00000009551				NA	NA	NA	NA	NA	wo.orthology	nontarget
6430548M08Rik	ENSMUSG00000031824				NA	NA	NA	NA	NA	wo.orthology	nontarget
6430550D23Rik	ENSMUSG00000074646				NA	NA	NA	NA	NA	wo.orthology	nontarget
6430571L13Rik	ENSMUSG00000037977				NA	NA	NA	NA	NA	wo.orthology	nontarget
6720489N17Rik	ENSMUSG00000072066				NA	NA	NA	NA	NA	wo.orthology	nontarget
7530416G11Rik	ENSMUSG00000096607				NA	NA	NA	NA	NA	wo.orthology	nontarget
8030462N17Rik	ENSMUSG00000047466				NA	NA	NA	NA	NA	wo.orthology	nontarget
8030462N17Rik	ENSMUSG00000116473				NA	NA	NA	NA	NA	wo.orthology	nontarget
8030474K03Rik	ENSMUSG00000046774				NA	NA	NA	NA	NA	wo.orthology	nontarget
9030025P20Rik	ENSMUSG00000116953				NA	NA	NA	NA	NA	wo.orthology	nontarget
9030624G23Rik	ENSMUSG00000073158				NA	NA	NA	NA	NA	wo.orthology	nontarget
9130008F23Rik	ENSMUSG00000054951				NA	NA	NA	NA	NA	wo.orthology	nontarget
9130019O22Rik	ENSMUSG00000030823				NA	NA	NA	NA	NA	wo.orthology	nontarget
9130023H24Rik	ENSMUSG00000062944				NA	NA	NA	NA	NA	wo.orthology	nontarget
9130401M01Rik	ENSMUSG00000101892				NA	NA	NA	NA	NA	wo.orthology	nontarget
9130401M01Rik	ENSMUSG00000116094				NA	NA	NA	NA	NA	wo.orthology	nontarget
9230019H11Rik	ENSMUSG00000071434				NA	NA	NA	NA	NA	wo.orthology	nontarget
9330159F19Rik	ENSMUSG00000004360				NA	NA	NA	NA	NA	wo.orthology	nontarget
9330182L06Rik	ENSMUSG00000056004				NA	NA	NA	NA	NA	wo.orthology	nontarget
9430015G10Rik	ENSMUSG00000059939				NA	NA	NA	NA	NA	wo.orthology	nontarget
9430038I01Rik	ENSMUSG00000040139				NA	NA	NA	NA	NA	wo.orthology	nontarget
9530068E07Rik	ENSMUSG00000036275				NA	NA	NA	NA	NA	wo.orthology	DAZL.target
9530077C05Rik	ENSMUSG00000036411				NA	NA	NA	NA	NA	wo.orthology	nontarget
9830107B12Rik	ENSMUSG00000073386				NA	NA	NA	NA	NA	wo.orthology	nontarget
9830107B12Rik	ENSMUSG00000115865				NA	NA	NA	NA	NA	wo.orthology	nontarget
9930021J03Rik	ENSMUSG00000046138				NA	NA	NA	NA	NA	wo.orthology	DAZL.target
9930104L06Rik	ENSMUSG00000044730				NA	NA	NA	NA	NA	wo.orthology	nontarget
9930111J21Rik1	ENSMUSG00000069893				NA	NA	NA	NA	NA	wo.orthology	nontarget
A130010J15Rik	ENSMUSG00000079144				NA	NA	NA	NA	NA	wo.orthology	nontarget
A2m	ENSMUSG00000030111				NA	NA	NA	NA	NA	wo.orthology	nontarget
A2ml1	ENSMUSG00000047228				NA	NA	NA	NA	NA	wo.orthology	nontarget
A430005L14Rik	ENSMUSG00000047613				NA	NA	NA	NA	NA	wo.orthology	nontarget
A430033K04Rik	ENSMUSG00000056014				NA	NA	NA	NA	NA	wo.orthology	nontarget
A4galt	ENSMUSG00000047878				NA	NA	NA	NA	NA	wo.orthology	nontarget
A530064D06Rik	ENSMUSG00000043939				NA	NA	NA	NA	NA	wo.orthology	nontarget
A530064D06Rik	ENSMUSG00000116468				NA	NA	NA	NA	NA	wo.orthology	nontarget
A630023A22Rik	ENSMUSG00000095493				NA	NA	NA	NA	NA	wo.orthology	nontarget
A830018L16Rik	ENSMUSG00000057715				NA	NA	NA	NA	NA	wo.orthology	nontarget
A930017K11Rik	ENSMUSG00000025727				NA	NA	NA	NA	NA	wo.orthology	nontarget
AA414768	ENSMUSG00000083307				NA	NA	NA	NA	NA	wo.orthology	nontarget
AA467197	ENSMUSG00000110868				NA	NA	NA	NA	NA	wo.orthology	nontarget
AA467197	ENSMUSG00000033213				NA	NA	NA	NA	NA	wo.orthology	nontarget
AA792892	ENSMUSG00000073497				NA	NA	NA	NA	NA	wo.orthology	nontarget
Aaas	ENSMUSG00000036678				NA	NA	NA	NA	NA	wo.orthology	nontarget
Aacs	ENSMUSG00000029482				NA	NA	NA	NA	NA	wo.orthology	nontarget
Aagab	ENSMUSG00000037257				NA	NA	NA	NA	NA	wo.orthology	nontarget
Aak1	ENSMUSG00000057230	YIL095W	PRK1	ortholog_many2many	18.6653	22.0988	NA	NA	0	w.orthology	nontarget
Aak1	ENSMUSG00000057230	YNL020C		ortholog_many2many	17.5182	26.3323	NA	NA	0	w.orthology	nontarget
Aamdc	ENSMUSG00000035642				NA	NA	NA	NA	NA	wo.orthology	nontarget
Aamp	ENSMUSG00000006299	YIR012W		ortholog_one2many	22.9358	23.2019	NA	NA	0	w.orthology	DAZL.target
Aar2	ENSMUSG00000027628	YBL074C		ortholog_one2one	17.4479	18.8732	NA	NA	0	w.orthology	nontarget
Aard	ENSMUSG00000068522				NA	NA	NA	NA	NA	wo.orthology	nontarget
Aars	ENSMUSG00000031960	YOR335C	ALA1	ortholog_one2one	49.2769	49.7912	NA	NA	1	w.orthology	nontarget
Aars2	ENSMUSG00000023938				NA	NA	NA	NA	NA	wo.orthology	nontarget
Aarsd1	ENSMUSG00000075528	YNL040W		ortholog_one2many	30.5825	27.6316	NA	NA	1	w.orthology	nontarget
Aasdh	ENSMUSG00000055923				NA	NA	NA	NA	NA	wo.orthology	nontarget
Aasdhppt	ENSMUSG00000025894				NA	NA	NA	NA	NA	wo.orthology	DAZL.target
Aatf	ENSMUSG00000018697	YDR299W		ortholog_one2one	22.6236	22.2846	NA	NA	0	w.orthology	nontarget
AB124611	ENSMUSG00000057191				NA	NA	NA	NA	NA	wo.orthology	nontarget
Abat	ENSMUSG00000057880	YGR019W		ortholog_one2one	38.8	41.189	NA	NA	1	w.orthology	nontarget
Abca1	ENSMUSG00000015243				NA	NA	NA	NA	NA	wo.orthology	DAZL.target
Abca13	ENSMUSG00000004668				NA	NA	NA	NA	NA	wo.orthology	nontarget
Abca16	ENSMUSG00000051900				NA	NA	NA	NA	NA	wo.orthology	nontarget
Abca17	ENSMUSG00000035435				NA	NA	NA	NA	NA	wo.orthology	nontarget
Abca2	ENSMUSG00000026944				NA	NA	NA	NA	NA	wo.orthology	nontarget
Abca3	ENSMUSG00000024130				NA	NA	NA	NA	NA	wo.orthology	nontarget
Abca5	ENSMUSG00000018800				NA	NA	NA	NA	NA	wo.orthology	nontarget
Abca6	ENSMUSG00000044749				NA	NA	NA	NA	NA	wo.orthology	nontarget
Abca7	ENSMUSG00000035722				NA	NA	NA	NA	NA	wo.orthology	nontarget
Abca8b	ENSMUSG00000020620				NA	NA	NA	NA	NA	wo.orthology	nontarget
Abcb10	ENSMUSG00000031974	YLR188W		ortholog_many2many	25.3147	26.0432	NA	NA	0	w.orthology	nontarget
Abcb10	ENSMUSG00000031974	YPL270W		ortholog_many2many	23.6364	21.8629	NA	NA	0	w.orthology	nontarget
Abcb1b	ENSMUSG00000028970	YPL270W		ortholog_many2many	13.0878	21.6041	NA	NA	0	w.orthology	nontarget
Abcb1b	ENSMUSG00000028970	YLR188W		ortholog_many2many	11.9122	21.8705	NA	NA	0	w.orthology	nontarget
Abcb6	ENSMUSG00000026198	YPL270W		ortholog_many2many	20.7838	22.6391	NA	NA	0	w.orthology	nontarget
Abcb6	ENSMUSG00000026198	YLR188W		ortholog_many2many	20.4276	24.7482	NA	NA	0	w.orthology	nontarget
Abcb7	ENSMUSG00000031333	YMR301C		ortholog_one2one	41.4894	45.2174	NA	NA	1	w.orthology	nontarget
Abcb8	ENSMUSG00000028973	YLR188W		ortholog_many2many	20.6416	21.295	NA	NA	0	w.orthology	nontarget
Abcb8	ENSMUSG00000028973	YPL270W		ortholog_many2many	22.4547	20.8279	NA	NA	0	w.orthology	nontarget
Abcb9	ENSMUSG00000029408	YPL270W		ortholog_many2many	21.7848	21.4748	NA	NA	0	w.orthology	nontarget
Abcb9	ENSMUSG00000029408	YLR188W		ortholog_many2many	22.5722	24.7482	NA	NA	0	w.orthology	nontarget
Abcc1	ENSMUSG00000023088				NA	NA	NA	NA	NA	wo.orthology	nontarget
Abcc10	ENSMUSG00000032842				NA	NA	NA	NA	NA	wo.orthology	nontarget
Abcc3	ENSMUSG00000020865				NA	NA	NA	NA	NA	wo.orthology	nontarget
Abcc4	ENSMUSG00000032849				NA	NA	NA	NA	NA	wo.orthology	nontarget
Abcc5	ENSMUSG00000022822				NA	NA	NA	NA	NA	wo.orthology	DAZL.target
Abcc8	ENSMUSG00000040136				NA	NA	NA	NA	NA	wo.orthology	nontarget
Abcd1	ENSMUSG00000031378	YPL147W	PXA1	ortholog_one2many	31.7935	26.8966	NA	NA	1	w.orthology	nontarget
Abcd2	ENSMUSG00000055782	YPL147W	PXA1	ortholog_one2many	33.4683	28.5057	NA	NA	1	w.orthology	nontarget
Abcd3	ENSMUSG00000028127	YPL147W	PXA1	ortholog_one2many	30.956	23.4483	NA	NA	0	w.orthology	DAZL.target
Abcd4	ENSMUSG00000021240				NA	NA	NA	NA	NA	wo.orthology	nontarget
Abce1	ENSMUSG00000058355	YDR091C		ortholog_one2one	68.4474	67.4342	NA	NA	1	w.orthology	nontarget
Abcf1	ENSMUSG00000038762				NA	NA	NA	NA	NA	wo.orthology	nontarget
Abcf2	ENSMUSG00000028953	YER036C		ortholog_one2one	49.2038	50.6557	NA	NA	1	w.orthology	nontarget
Abcf3	ENSMUSG00000003234	YFR009W		ortholog_one2one	42.7362	40.2926	NA	NA	1	w.orthology	nontarget
Abcg1	ENSMUSG00000024030	YPL058C		ortholog_many2many	25.8258	11.3832	NA	NA	0	w.orthology	nontarget
Abcg1	ENSMUSG00000024030	YOR328W		ortholog_many2many	24.4745	10.422	NA	NA	0	w.orthology	nontarget
Abcg1	ENSMUSG00000024030	YIL013C		ortholog_many2many	24.4745	11.5521	NA	NA	0	w.orthology	nontarget
Abcg1	ENSMUSG00000024030	YOR011W		ortholog_many2many	22.6727	10.8321	NA	NA	0	w.orthology	nontarget
Abcg1	ENSMUSG00000024030	YNR070W		ortholog_many2many	24.1742	12.078	NA	NA	0	w.orthology	nontarget
Abcg1	ENSMUSG00000024030	YOR153W	PDR5	ortholog_many2many	25.6757	11.317	NA	NA	0	w.orthology	nontarget
Abcg1	ENSMUSG00000024030	YDR011W		ortholog_many2many	26.1261	11.5923	NA	NA	0	w.orthology	nontarget
Abcg1	ENSMUSG00000024030	YDR406W		ortholog_many2many	24.4745	10.6606	NA	NA	0	w.orthology	nontarget
Abcg2	ENSMUSG00000029802	YDR406W		ortholog_many2many	27.5495	11.8378	NA	NA	0	w.orthology	nontarget
Abcg2	ENSMUSG00000029802	YOR153W	PDR5	ortholog_many2many	28.9193	12.5745	NA	NA	0	w.orthology	nontarget
Abcg2	ENSMUSG00000029802	YNR070W		ortholog_many2many	26.3318	12.9782	NA	NA	0	w.orthology	nontarget
Abcg2	ENSMUSG00000029802	YOR328W		ortholog_many2many	27.3973	11.509	NA	NA	0	w.orthology	nontarget
Abcg2	ENSMUSG00000029802	YIL013C		ortholog_many2many	23.5921	10.9851	NA	NA	0	w.orthology	nontarget
Abcg2	ENSMUSG00000029802	YDR011W		ortholog_many2many	27.5495	12.0586	NA	NA	0	w.orthology	nontarget
Abcg2	ENSMUSG00000029802	YPL058C		ortholog_many2many	25.1142	10.9199	NA	NA	0	w.orthology	nontarget
Abcg2	ENSMUSG00000029802	YOR011W		ortholog_many2many	24.8097	11.693	NA	NA	0	w.orthology	nontarget
Abhd10	ENSMUSG00000033157				NA	NA	NA	NA	NA	wo.orthology	nontarget
Abhd11	ENSMUSG00000040532	YGR031W		ortholog_one2one	29.316	26.3158	NA	NA	1	w.orthology	nontarget
Abhd12	ENSMUSG00000032046				NA	NA	NA	NA	NA	wo.orthology	nontarget
Abhd13	ENSMUSG00000040396	YNL320W		ortholog_one2one	30.2671	35.9155	NA	NA	1	w.orthology	nontarget
Abhd14a	ENSMUSG00000042210	YGR110W		ortholog_many2many	17.2932	10.3371	NA	NA	0	w.orthology	nontarget
Abhd14a	ENSMUSG00000042210	YBR204C		ortholog_many2many	17.2932	12.2667	NA	NA	0	w.orthology	nontarget
Abhd16a	ENSMUSG00000007036				NA	NA	NA	NA	NA	wo.orthology	nontarget
Abhd17a	ENSMUSG00000003346				NA	NA	NA	NA	NA	wo.orthology	DAZL.target
Abhd17b	ENSMUSG00000047368				NA	NA	NA	NA	NA	wo.orthology	nontarget
Abhd17c	ENSMUSG00000038459				NA	NA	NA	NA	NA	wo.orthology	DAZL.target
Abhd18	ENSMUSG00000115963				NA	NA	NA	NA	NA	wo.orthology	nontarget
Abhd18	ENSMUSG00000037818				NA	NA	NA	NA	NA	wo.orthology	nontarget
Abhd2	ENSMUSG00000039202	YMR210W		ortholog_many2many	16.9412	16.0356	NA	NA	0	w.orthology	DAZL.target
Abhd2	ENSMUSG00000039202	YBR177C		ortholog_many2many	16.7059	15.7428	NA	NA	0	w.orthology	DAZL.target
Abhd2	ENSMUSG00000039202	YPL095C		ortholog_many2many	16.7059	15.5702	NA	NA	0	w.orthology	DAZL.target
Abhd3	ENSMUSG00000002475	YMR210W		ortholog_many2many	21.8978	20.0445	NA	NA	0	w.orthology	nontarget
Abhd3	ENSMUSG00000002475	YBR177C		ortholog_many2many	22.3844	20.3991	NA	NA	0	w.orthology	nontarget
Abhd3	ENSMUSG00000002475	YPL095C		ortholog_many2many	25.3041	22.807	NA	NA	0	w.orthology	nontarget
Abhd4	ENSMUSG00000040997	YGR110W		ortholog_many2many	22.2535	17.7528	NA	NA	0	w.orthology	nontarget
Abhd4	ENSMUSG00000040997	YBR204C		ortholog_many2many	18.3099	17.3333	NA	NA	0	w.orthology	nontarget
Abhd5	ENSMUSG00000032540	YBR204C		ortholog_many2many	17.094	16	NA	NA	0	w.orthology	nontarget
Abhd5	ENSMUSG00000032540	YGR110W		ortholog_many2many	20.7977	16.4045	NA	NA	0	w.orthology	nontarget
Abhd6	ENSMUSG00000025277	YBR204C		ortholog_many2many	14.881	13.3333	NA	NA	0	w.orthology	nontarget
Abhd6	ENSMUSG00000025277	YGR110W		ortholog_many2many	15.7738	11.9101	NA	NA	0	w.orthology	nontarget
Abhd8	ENSMUSG00000007950	YBR204C		ortholog_many2many	12.7563	14.9333	NA	NA	0	w.orthology	nontarget
Abhd8	ENSMUSG00000007950	YGR110W		ortholog_many2many	14.123	13.9326	NA	NA	0	w.orthology	nontarget
Abi1	ENSMUSG00000058835				NA	NA	NA	NA	NA	wo.orthology	DAZL.target
Abi2	ENSMUSG00000026782				NA	NA	NA	NA	NA	wo.orthology	nontarget
Abi3	ENSMUSG00000018381				NA	NA	NA	NA	NA	wo.orthology	nontarget
Abi3bp	ENSMUSG00000035258				NA	NA	NA	NA	NA	wo.orthology	nontarget
Abl1	ENSMUSG00000026842				NA	NA	NA	NA	NA	wo.orthology	DAZL.target
Abl2	ENSMUSG00000026596				NA	NA	NA	NA	NA	wo.orthology	DAZL.target
Ablim1	ENSMUSG00000025085				NA	NA	NA	NA	NA	wo.orthology	nontarget
Ablim3	ENSMUSG00000032735				NA	NA	NA	NA	NA	wo.orthology	nontarget
Abr	ENSMUSG00000017631				NA	NA	NA	NA	NA	wo.orthology	nontarget
Abracl	ENSMUSG00000078453				NA	NA	NA	NA	NA	wo.orthology	nontarget
Abraxas1	ENSMUSG00000035234				NA	NA	NA	NA	NA	wo.orthology	DAZL.target
Abraxas2	ENSMUSG00000030965				NA	NA	NA	NA	NA	wo.orthology	nontarget
Abt1	ENSMUSG00000036376	YNR054C	ESF2	ortholog_one2one	24.5353	20.8861	NA	NA	0	w.orthology	nontarget
Abtb1	ENSMUSG00000030083				NA	NA	NA	NA	NA	wo.orthology	nontarget
Abtb2	ENSMUSG00000032724				NA	NA	NA	NA	NA	wo.orthology	nontarget
Acaa1a	ENSMUSG00000036138	YIL160C	POT1	ortholog_one2many	50.9434	51.7986	NA	NA	1	w.orthology	nontarget
Acaa1b	ENSMUSG00000010651	YIL160C	POT1	ortholog_one2many	51.4151	52.2782	NA	NA	1	w.orthology	nontarget
Acaa2	ENSMUSG00000036880				NA	NA	NA	NA	NA	wo.orthology	nontarget
Acaca	ENSMUSG00000020532				NA	NA	NA	NA	NA	wo.orthology	nontarget
Acacb	ENSMUSG00000042010				NA	NA	NA	NA	NA	wo.orthology	nontarget
Acad10	ENSMUSG00000029456				NA	NA	NA	NA	NA	wo.orthology	nontarget
Acad11	ENSMUSG00000090150				NA	NA	NA	NA	NA	wo.orthology	nontarget
Acad12	ENSMUSG00000042647				NA	NA	NA	NA	NA	wo.orthology	nontarget
Acad8	ENSMUSG00000031969				NA	NA	NA	NA	NA	wo.orthology	nontarget
Acad9	ENSMUSG00000027710				NA	NA	NA	NA	NA	wo.orthology	nontarget
Acadl	ENSMUSG00000026003				NA	NA	NA	NA	NA	wo.orthology	nontarget
Acadm	ENSMUSG00000062908				NA	NA	NA	NA	NA	wo.orthology	DAZL.target
Acads	ENSMUSG00000029545				NA	NA	NA	NA	NA	wo.orthology	nontarget
Acadsb	ENSMUSG00000030861				NA	NA	NA	NA	NA	wo.orthology	nontarget
Acadvl	ENSMUSG00000018574				NA	NA	NA	NA	NA	wo.orthology	nontarget
Acan	ENSMUSG00000030607				NA	NA	NA	NA	NA	wo.orthology	nontarget
Acap2	ENSMUSG00000049076				NA	NA	NA	NA	NA	wo.orthology	nontarget
Acap3	ENSMUSG00000029033				NA	NA	NA	NA	NA	wo.orthology	nontarget
Acat1	ENSMUSG00000032047	YPL028W	ERG10	ortholog_one2one	46.4623	49.4975	NA	NA	0	w.orthology	nontarget
Acat2	ENSMUSG00000023832				NA	NA	NA	NA	NA	wo.orthology	nontarget
Acat3	ENSMUSG00000062480				NA	NA	NA	NA	NA	wo.orthology	nontarget
Acbd3	ENSMUSG00000026499				NA	NA	NA	NA	NA	wo.orthology	DAZL.target
Acbd4	ENSMUSG00000056938	YGR037C		ortholog_one2many	9.17431	34.4828	NA	NA	0	w.orthology	nontarget
Acbd5	ENSMUSG00000026781	YGR037C		ortholog_one2many	5.50098	32.1839	NA	NA	0	w.orthology	nontarget
Acbd6	ENSMUSG00000033701				NA	NA	NA	NA	NA	wo.orthology	nontarget
Acbd7	ENSMUSG00000026644				NA	NA	NA	NA	NA	wo.orthology	nontarget
Accs	ENSMUSG00000040272	YLR089C		ortholog_many2many	15.7371	13.3446	NA	NA	0	w.orthology	nontarget
Accs	ENSMUSG00000040272	YDR111C		ortholog_many2many	16.1355	15.9763	NA	NA	0	w.orthology	nontarget
Accs	ENSMUSG00000040272	YJL060W		ortholog_many2many	13.9442	15.7658	NA	NA	0	w.orthology	nontarget
Acd	ENSMUSG00000038000				NA	NA	NA	NA	NA	wo.orthology	nontarget
Ace	ENSMUSG00000020681				NA	NA	NA	NA	NA	wo.orthology	nontarget
Acer1	ENSMUSG00000045019	YPL087W		ortholog_many2many	20.8791	17.9811	NA	NA	0	w.orthology	nontarget
Acer1	ENSMUSG00000045019	YBR183W	YPC1	ortholog_many2many	19.4139	16.7722	NA	NA	0	w.orthology	nontarget
Acer2	ENSMUSG00000038007	YPL087W		ortholog_many2many	19.2727	16.7192	NA	NA	0	w.orthology	nontarget
Acer2	ENSMUSG00000038007	YBR183W	YPC1	ortholog_many2many	19.6364	17.0886	NA	NA	0	w.orthology	nontarget
Acer3	ENSMUSG00000030760	YPL087W		ortholog_many2many	34.4569	29.0221	NA	NA	1	w.orthology	nontarget
Acer3	ENSMUSG00000030760	YBR183W	YPC1	ortholog_many2many	34.8315	29.4304	NA	NA	1	w.orthology	nontarget
Acin1	ENSMUSG00000022185				NA	NA	NA	NA	NA	wo.orthology	nontarget
Ackr4	ENSMUSG00000079355				NA	NA	NA	NA	NA	wo.orthology	nontarget
Acly	ENSMUSG00000020917				NA	NA	NA	NA	NA	wo.orthology	DAZL.target
Acmsd	ENSMUSG00000026348				NA	NA	NA	NA	NA	wo.orthology	nontarget
Acnat1	ENSMUSG00000070985				NA	NA	NA	NA	NA	wo.orthology	nontarget
Aco1	ENSMUSG00000028405				NA	NA	NA	NA	NA	wo.orthology	DAZL.target
Aco2	ENSMUSG00000022477	YLR304C	ACO1	ortholog_one2one	65.7692	65.9383	NA	NA	1	w.orthology	DAZL.target
Acot1	ENSMUSG00000072949				NA	NA	NA	NA	NA	wo.orthology	nontarget
Acot11	ENSMUSG00000034853				NA	NA	NA	NA	NA	wo.orthology	nontarget
Acot13	ENSMUSG00000006717				NA	NA	NA	NA	NA	wo.orthology	nontarget
Acot2	ENSMUSG00000021226				NA	NA	NA	NA	NA	wo.orthology	nontarget
Acot6	ENSMUSG00000043487				NA	NA	NA	NA	NA	wo.orthology	nontarget
Acot7	ENSMUSG00000028937				NA	NA	NA	NA	NA	wo.orthology	nontarget
Acot8	ENSMUSG00000017307	YJR019C	TES1	ortholog_one2one	25.625	23.4957	NA	NA	0	w.orthology	nontarget
Acot9	ENSMUSG00000025287				NA	NA	NA	NA	NA	wo.orthology	nontarget
Acox1	ENSMUSG00000020777				NA	NA	NA	NA	NA	wo.orthology	nontarget
Acox3	ENSMUSG00000029098				NA	NA	NA	NA	NA	wo.orthology	nontarget
Acp1	ENSMUSG00000044573				NA	NA	NA	NA	NA	wo.orthology	nontarget
Acp2	ENSMUSG00000002103				NA	NA	NA	NA	NA	wo.orthology	nontarget
Acp5	ENSMUSG00000001348				NA	NA	NA	NA	NA	wo.orthology	nontarget
Acp6	ENSMUSG00000028093				NA	NA	NA	NA	NA	wo.orthology	nontarget
Acpp	ENSMUSG00000032561				NA	NA	NA	NA	NA	wo.orthology	nontarget
Acr	ENSMUSG00000022622				NA	NA	NA	NA	NA	wo.orthology	nontarget
Acrbp	ENSMUSG00000072770				NA	NA	NA	NA	NA	wo.orthology	nontarget
Acsbg1	ENSMUSG00000032281	YBR041W		ortholog_many2many	11.9279	12.855	NA	NA	0	w.orthology	nontarget
Acsbg2	ENSMUSG00000024207	YBR041W		ortholog_many2many	12.8936	12.855	NA	NA	0	w.orthology	nontarget
Acsf2	ENSMUSG00000076435				NA	NA	NA	NA	NA	wo.orthology	nontarget
Acsf3	ENSMUSG00000015016				NA	NA	NA	NA	NA	wo.orthology	nontarget
Acsl1	ENSMUSG00000018796	YBR041W		ortholog_many2many	13.877	14.4993	NA	NA	0	w.orthology	DAZL.target
Acsl3	ENSMUSG00000032883	YBR041W		ortholog_many2many	12.7778	13.7519	NA	NA	0	w.orthology	DAZL.target
Acsl4	ENSMUSG00000031278	YBR041W		ortholog_many2many	13.3615	14.2003	NA	NA	0	w.orthology	nontarget
Acsl5	ENSMUSG00000024981				NA	NA	NA	NA	NA	wo.orthology	nontarget
Acsm2	ENSMUSG00000030945	YBR222C	PCS60	ortholog_many2many	16.1667	17.8637	NA	NA	0	w.orthology	nontarget
Acss1	ENSMUSG00000027452				NA	NA	NA	NA	NA	wo.orthology	nontarget
Acss2	ENSMUSG00000027605				NA	NA	NA	NA	NA	wo.orthology	DAZL.target
Acta2	ENSMUSG00000035783				NA	NA	NA	NA	NA	wo.orthology	nontarget
Actb	ENSMUSG00000029580	YFL039C	ACT1	ortholog_one2many	88.8	88.8	NA	NA	1	w.orthology	DAZL.target
Actg1	ENSMUSG00000062825	YFL039C	ACT1	ortholog_one2many	89.0667	89.0667	NA	NA	1	w.orthology	nontarget
Actl6a	ENSMUSG00000027671				NA	NA	NA	NA	NA	wo.orthology	DAZL.target
Actn1	ENSMUSG00000015143				NA	NA	NA	NA	NA	wo.orthology	DAZL.target
Actn2	ENSMUSG00000052374				NA	NA	NA	NA	NA	wo.orthology	nontarget
Actn3	ENSMUSG00000006457				NA	NA	NA	NA	NA	wo.orthology	nontarget
Actn4	ENSMUSG00000054808				NA	NA	NA	NA	NA	wo.orthology	nontarget
Actr10	ENSMUSG00000021076				NA	NA	NA	NA	NA	wo.orthology	DAZL.target
Actr1a	ENSMUSG00000025228				NA	NA	NA	NA	NA	wo.orthology	nontarget
Actr1b	ENSMUSG00000037351				NA	NA	NA	NA	NA	wo.orthology	nontarget
Actr2	ENSMUSG00000020152				NA	NA	NA	NA	NA	wo.orthology	nontarget
Actr3	ENSMUSG00000026341				NA	NA	NA	NA	NA	wo.orthology	nontarget
Actr3b	ENSMUSG00000056367				NA	NA	NA	NA	NA	wo.orthology	nontarget
Actr5	ENSMUSG00000037761	YNL059C		ortholog_one2one	28.9474	23.3113	NA	NA	0	w.orthology	nontarget
Actr6	ENSMUSG00000019948	YLR085C		ortholog_one2one	29.798	26.9406	NA	NA	1	w.orthology	DAZL.target
Actr8	ENSMUSG00000015971	YOR141C		ortholog_one2one	23.8782	16.9126	NA	NA	0	w.orthology	nontarget
Acvr1	ENSMUSG00000026836				NA	NA	NA	NA	NA	wo.orthology	nontarget
Acvr1b	ENSMUSG00000000532				NA	NA	NA	NA	NA	wo.orthology	nontarget
Acvr2a	ENSMUSG00000052155				NA	NA	NA	NA	NA	wo.orthology	nontarget
Acvr2b	ENSMUSG00000061393				NA	NA	NA	NA	NA	wo.orthology	DAZL.target
Acy1	ENSMUSG00000023262				NA	NA	NA	NA	NA	wo.orthology	nontarget
Acy3	ENSMUSG00000024866				NA	NA	NA	NA	NA	wo.orthology	nontarget
Acyp1	ENSMUSG00000008822				NA	NA	NA	NA	NA	wo.orthology	nontarget
Acyp2	ENSMUSG00000060923				NA	NA	NA	NA	NA	wo.orthology	nontarget
Ada	ENSMUSG00000017697	YNL141W		ortholog_one2many	25.8523	26.2248	NA	NA	1	w.orthology	nontarget
Adad1	ENSMUSG00000027719				NA	NA	NA	NA	NA	wo.orthology	nontarget
Adad2	ENSMUSG00000024266				NA	NA	NA	NA	NA	wo.orthology	nontarget
Adal	ENSMUSG00000027259	YNL141W		ortholog_one2many	21.1111	21.902	NA	NA	0	w.orthology	DAZL.target
Adam10	ENSMUSG00000054693				NA	NA	NA	NA	NA	wo.orthology	DAZL.target
Adam15	ENSMUSG00000028041				NA	NA	NA	NA	NA	wo.orthology	nontarget
Adam17	ENSMUSG00000052593				NA	NA	NA	NA	NA	wo.orthology	nontarget
Adam19	ENSMUSG00000011256				NA	NA	NA	NA	NA	wo.orthology	nontarget
Adam1a	ENSMUSG00000072647				NA	NA	NA	NA	NA	wo.orthology	nontarget
Adam22	ENSMUSG00000040537				NA	NA	NA	NA	NA	wo.orthology	nontarget
Adam23	ENSMUSG00000025964				NA	NA	NA	NA	NA	wo.orthology	nontarget
Adam4	ENSMUSG00000072972				NA	NA	NA	NA	NA	wo.orthology	nontarget
Adam9	ENSMUSG00000031555				NA	NA	NA	NA	NA	wo.orthology	nontarget
Adamts10	ENSMUSG00000024299				NA	NA	NA	NA	NA	wo.orthology	nontarget
Adamts17	ENSMUSG00000058145				NA	NA	NA	NA	NA	wo.orthology	nontarget
Adamts19	ENSMUSG00000053441				NA	NA	NA	NA	NA	wo.orthology	nontarget
Adamts2	ENSMUSG00000036545				NA	NA	NA	NA	NA	wo.orthology	nontarget
Adamts20	ENSMUSG00000022449				NA	NA	NA	NA	NA	wo.orthology	nontarget
Adamts3	ENSMUSG00000043635				NA	NA	NA	NA	NA	wo.orthology	nontarget
Adamts4	ENSMUSG00000006403				NA	NA	NA	NA	NA	wo.orthology	nontarget
Adamts7	ENSMUSG00000032363				NA	NA	NA	NA	NA	wo.orthology	nontarget
Adamts9	ENSMUSG00000030022				NA	NA	NA	NA	NA	wo.orthology	nontarget
Adamtsl4	ENSMUSG00000015850				NA	NA	NA	NA	NA	wo.orthology	nontarget
Adap1	ENSMUSG00000056413				NA	NA	NA	NA	NA	wo.orthology	nontarget
Adar	ENSMUSG00000027951				NA	NA	NA	NA	NA	wo.orthology	nontarget
Adarb1	ENSMUSG00000020262				NA	NA	NA	NA	NA	wo.orthology	nontarget
Adat1	ENSMUSG00000031949				NA	NA	NA	NA	NA	wo.orthology	nontarget
Adat2	ENSMUSG00000019808	YJL035C		ortholog_many2many	35.6021	27.2	NA	NA	0	w.orthology	nontarget
Adat3	ENSMUSG00000113640	YLR316C		ortholog_one2many	20.3438	22.0497	NA	NA	0	w.orthology	nontarget
Adck1	ENSMUSG00000021044	YLR253W		ortholog_one2one	31.0476	28.6467	NA	NA	1	w.orthology	nontarget
Adck2	ENSMUSG00000046947	YPL109C		ortholog_one2many	27.2285	25.5708	NA	NA	1	w.orthology	nontarget
Adck5	ENSMUSG00000022550				NA	NA	NA	NA	NA	wo.orthology	nontarget
Adcy1	ENSMUSG00000020431				NA	NA	NA	NA	NA	wo.orthology	nontarget
Adcy10	ENSMUSG00000026567				NA	NA	NA	NA	NA	wo.orthology	nontarget
Adcy2	ENSMUSG00000021536				NA	NA	NA	NA	NA	wo.orthology	nontarget
Adcy3	ENSMUSG00000020654				NA	NA	NA	NA	NA	wo.orthology	nontarget
Adcy5	ENSMUSG00000022840				NA	NA	NA	NA	NA	wo.orthology	nontarget
Adcy6	ENSMUSG00000022994				NA	NA	NA	NA	NA	wo.orthology	nontarget
Adcy7	ENSMUSG00000031659				NA	NA	NA	NA	NA	wo.orthology	nontarget
Adcy9	ENSMUSG00000005580				NA	NA	NA	NA	NA	wo.orthology	nontarget
Adcyap1r1	ENSMUSG00000029778				NA	NA	NA	NA	NA	wo.orthology	nontarget
Add1	ENSMUSG00000029106				NA	NA	NA	NA	NA	wo.orthology	nontarget
Add2	ENSMUSG00000030000				NA	NA	NA	NA	NA	wo.orthology	nontarget
Add3	ENSMUSG00000025026				NA	NA	NA	NA	NA	wo.orthology	DAZL.target
Adgra3	ENSMUSG00000029090				NA	NA	NA	NA	NA	wo.orthology	DAZL.target
Adgrb2	ENSMUSG00000028782				NA	NA	NA	NA	NA	wo.orthology	nontarget
Adgrb3	ENSMUSG00000033569				NA	NA	NA	NA	NA	wo.orthology	nontarget
Adgrd1	ENSMUSG00000044017				NA	NA	NA	NA	NA	wo.orthology	nontarget
Adgre5	ENSMUSG00000002885				NA	NA	NA	NA	NA	wo.orthology	nontarget
Adgrg1	ENSMUSG00000031785				NA	NA	NA	NA	NA	wo.orthology	DAZL.target
Adgrg2	ENSMUSG00000031298				NA	NA	NA	NA	NA	wo.orthology	nontarget
Adgrl1	ENSMUSG00000013033				NA	NA	NA	NA	NA	wo.orthology	nontarget
Adgrl2	ENSMUSG00000028184				NA	NA	NA	NA	NA	wo.orthology	nontarget
Adgrl3	ENSMUSG00000037605				NA	NA	NA	NA	NA	wo.orthology	nontarget
Adgrv1	ENSMUSG00000069170				NA	NA	NA	NA	NA	wo.orthology	nontarget
Adh5	ENSMUSG00000028138	YCR105W	ADH7	ortholog_many2many	22.1925	22.9917	NA	NA	0	w.orthology	nontarget
Adh5	ENSMUSG00000028138	YER101C		ortholog_many2many	14.1711	12.3256	NA	NA	0	w.orthology	nontarget
Adh5	ENSMUSG00000028138	YAL061W		ortholog_many2many	17.6471	15.8273	NA	NA	0	w.orthology	nontarget
Adh5	ENSMUSG00000028138	YCR102C		ortholog_many2many	20.3209	20.6522	NA	NA	0	w.orthology	nontarget
Adh5	ENSMUSG00000028138	YMR318C	ADH6	ortholog_many2many	23.5294	24.4444	NA	NA	0	w.orthology	nontarget
Adh5	ENSMUSG00000028138	YMR083W		ortholog_many2many	20.3209	20.2667	NA	NA	0	w.orthology	nontarget
Adh5	ENSMUSG00000028138	YNL134C		ortholog_many2many	21.6578	21.5426	NA	NA	0	w.orthology	nontarget
Adh5	ENSMUSG00000028138	YBL069W		ortholog_many2many	13.9037	12.1212	NA	NA	0	w.orthology	nontarget
Adh5	ENSMUSG00000028138	YLR070C		ortholog_many2many	22.4599	23.5955	NA	NA	0	w.orthology	nontarget
Adh5	ENSMUSG00000028138	YAL060W	BDH1	ortholog_many2many	18.1818	17.801	NA	NA	0	w.orthology	nontarget
Adh5	ENSMUSG00000028138	YBR145W		ortholog_many2many	20.8556	22.2222	NA	NA	0	w.orthology	nontarget
Adh5	ENSMUSG00000028138	YBL068W-A		ortholog_many2many	2.94118	14.1026	NA	NA	0	w.orthology	nontarget
Adh5	ENSMUSG00000028138	YJR159W	SOR1	ortholog_many2many	22.4599	23.5294	NA	NA	0	w.orthology	nontarget
Adh5	ENSMUSG00000028138	YOL086C	ADH1	ortholog_many2many	19.5187	20.977	NA	NA	0	w.orthology	nontarget
Adh5	ENSMUSG00000028138	YDL168W	SFA1	ortholog_many2many	62.0321	60.1036	NA	NA	0	w.orthology	nontarget
Adh5	ENSMUSG00000028138	YDL246C		ortholog_many2many	22.4599	23.5294	NA	NA	0	w.orthology	nontarget
Adh5	ENSMUSG00000028138	YLR460C		ortholog_many2many	21.123	21.0106	NA	NA	0	w.orthology	nontarget
Adh5	ENSMUSG00000028138	YMR303C	ADH2	ortholog_many2many	20.3209	21.8391	NA	NA	0	w.orthology	nontarget
Adi1	ENSMUSG00000020629	YMR009W		ortholog_one2one	42.4581	42.4581	NA	NA	1	w.orthology	DAZL.target
Adipoq	ENSMUSG00000022878				NA	NA	NA	NA	NA	wo.orthology	nontarget
Adipor1	ENSMUSG00000026457	YOL002C	IZH2	ortholog_many2many	21.0667	24.9211	NA	NA	0	w.orthology	nontarget
Adipor1	ENSMUSG00000026457	YDR492W		ortholog_many2many	19.2	22.7848	NA	NA	0	w.orthology	nontarget
Adipor2	ENSMUSG00000030168				NA	NA	NA	NA	NA	wo.orthology	DAZL.target
Adk	ENSMUSG00000039197	YJR105W		ortholog_one2one	36.8421	39.1176	NA	NA	1	w.orthology	DAZL.target
Adm	ENSMUSG00000030790				NA	NA	NA	NA	NA	wo.orthology	nontarget
Adnp	ENSMUSG00000051149				NA	NA	NA	NA	NA	wo.orthology	DAZL.target
Adnp2	ENSMUSG00000053950				NA	NA	NA	NA	NA	wo.orthology	nontarget
Ado	ENSMUSG00000116486				NA	NA	NA	NA	NA	wo.orthology	DAZL.target
Ado	ENSMUSG00000057134				NA	NA	NA	NA	NA	wo.orthology	DAZL.target
Adora2b	ENSMUSG00000018500				NA	NA	NA	NA	NA	wo.orthology	nontarget
Adpgk	ENSMUSG00000025236				NA	NA	NA	NA	NA	wo.orthology	nontarget
Adprh	ENSMUSG00000002844				NA	NA	NA	NA	NA	wo.orthology	DAZL.target
Adprhl2	ENSMUSG00000042558				NA	NA	NA	NA	NA	wo.orthology	nontarget
Adprm	ENSMUSG00000020910				NA	NA	NA	NA	NA	wo.orthology	nontarget
Adra2b	ENSMUSG00000058620				NA	NA	NA	NA	NA	wo.orthology	nontarget
Adrb1	ENSMUSG00000035283				NA	NA	NA	NA	NA	wo.orthology	nontarget
Adrb3	ENSMUSG00000031489				NA	NA	NA	NA	NA	wo.orthology	nontarget
Adrm1	ENSMUSG00000039041	YLR421C		ortholog_one2many	10.3194	26.9231	NA	NA	0	w.orthology	nontarget
Adsl	ENSMUSG00000022407	YLR359W	ADE13	ortholog_one2one	62.3967	62.6556	NA	NA	0	w.orthology	nontarget
Adss	ENSMUSG00000015961	YNL220W	ADE12	ortholog_one2many	54.1667	57.0439	NA	NA	1	w.orthology	DAZL.target
Adtrp	ENSMUSG00000058022				NA	NA	NA	NA	NA	wo.orthology	nontarget
Aebp1	ENSMUSG00000020473				NA	NA	NA	NA	NA	wo.orthology	nontarget
Aebp2	ENSMUSG00000030232				NA	NA	NA	NA	NA	wo.orthology	DAZL.target
Aen	ENSMUSG00000030609	YLR107W		ortholog_many2many	16.9643	14.1089	NA	NA	0	w.orthology	nontarget
Afap1	ENSMUSG00000029094				NA	NA	NA	NA	NA	wo.orthology	nontarget
Afap1l1	ENSMUSG00000033032				NA	NA	NA	NA	NA	wo.orthology	nontarget
Afap1l2	ENSMUSG00000025083				NA	NA	NA	NA	NA	wo.orthology	nontarget
Afdn	ENSMUSG00000068036				NA	NA	NA	NA	NA	wo.orthology	DAZL.target
Aff1	ENSMUSG00000029313				NA	NA	NA	NA	NA	wo.orthology	nontarget
Aff3	ENSMUSG00000037138				NA	NA	NA	NA	NA	wo.orthology	DAZL.target
Aff4	ENSMUSG00000049470				NA	NA	NA	NA	NA	wo.orthology	nontarget
Afg1l	ENSMUSG00000038302	YEL052W		ortholog_one2one	34.1667	32.22	NA	NA	1	w.orthology	nontarget
Afg3l1	ENSMUSG00000031967				NA	NA	NA	NA	NA	wo.orthology	nontarget
Afg3l2	ENSMUSG00000024527				NA	NA	NA	NA	NA	wo.orthology	DAZL.target
Afmid	ENSMUSG00000017718				NA	NA	NA	NA	NA	wo.orthology	nontarget
Afp	ENSMUSG00000054932				NA	NA	NA	NA	NA	wo.orthology	nontarget
Aftph	ENSMUSG00000049659				NA	NA	NA	NA	NA	wo.orthology	nontarget
Aga	ENSMUSG00000031521				NA	NA	NA	NA	NA	wo.orthology	DAZL.target
Agap1	ENSMUSG00000055013				NA	NA	NA	NA	NA	wo.orthology	nontarget
Agap2	ENSMUSG00000025422				NA	NA	NA	NA	NA	wo.orthology	nontarget
Agap3	ENSMUSG00000023353				NA	NA	NA	NA	NA	wo.orthology	nontarget
Agbl2	ENSMUSG00000040812				NA	NA	NA	NA	NA	wo.orthology	nontarget
Agbl3	ENSMUSG00000038836				NA	NA	NA	NA	NA	wo.orthology	nontarget
Agbl4	ENSMUSG00000061298				NA	NA	NA	NA	NA	wo.orthology	nontarget
Agbl5	ENSMUSG00000029165				NA	NA	NA	NA	NA	wo.orthology	nontarget
Agfg1	ENSMUSG00000026159				NA	NA	NA	NA	NA	wo.orthology	DAZL.target
Agfg2	ENSMUSG00000029722				NA	NA	NA	NA	NA	wo.orthology	nontarget
Aggf1	ENSMUSG00000021681				NA	NA	NA	NA	NA	wo.orthology	nontarget
Agk	ENSMUSG00000029916				NA	NA	NA	NA	NA	wo.orthology	nontarget
Agl	ENSMUSG00000033400	YPR184W		ortholog_one2one	37.9243	37.8255	NA	NA	1	w.orthology	nontarget
Ago1	ENSMUSG00000041530				NA	NA	NA	NA	NA	wo.orthology	nontarget
Ago2	ENSMUSG00000036698				NA	NA	NA	NA	NA	wo.orthology	nontarget
Ago3	ENSMUSG00000028842				NA	NA	NA	NA	NA	wo.orthology	nontarget
Ago4	ENSMUSG00000042500				NA	NA	NA	NA	NA	wo.orthology	nontarget
Agpat1	ENSMUSG00000034254	YDL052C		ortholog_one2many	30.5263	28.7129	NA	NA	1	w.orthology	nontarget
Agpat2	ENSMUSG00000026922	YDL052C		ortholog_one2many	28.777	26.4026	NA	NA	1	w.orthology	nontarget
Agpat3	ENSMUSG00000001211	YDR018C		ortholog_many2many	15.9574	15.1515	NA	NA	0	w.orthology	nontarget
Agpat3	ENSMUSG00000001211	YBR042C	CST26	ortholog_many2many	17.0213	16.1209	NA	NA	0	w.orthology	nontarget
Agpat4	ENSMUSG00000023827	YBR042C	CST26	ortholog_many2many	17.7249	16.8766	NA	NA	0	w.orthology	nontarget
Agpat4	ENSMUSG00000023827	YDR018C		ortholog_many2many	18.7831	17.9293	NA	NA	0	w.orthology	nontarget
Agpat5	ENSMUSG00000031467	YBR042C	CST26	ortholog_many2many	18.3562	16.8766	NA	NA	0	w.orthology	DAZL.target
Agpat5	ENSMUSG00000031467	YDR018C		ortholog_many2many	19.4521	17.9293	NA	NA	0	w.orthology	DAZL.target
Agps	ENSMUSG00000042410				NA	NA	NA	NA	NA	wo.orthology	DAZL.target
Agrn	ENSMUSG00000041936				NA	NA	NA	NA	NA	wo.orthology	nontarget
Agrp	ENSMUSG00000005705				NA	NA	NA	NA	NA	wo.orthology	nontarget
Agtpbp1	ENSMUSG00000021557				NA	NA	NA	NA	NA	wo.orthology	nontarget
Agtrap	ENSMUSG00000029007				NA	NA	NA	NA	NA	wo.orthology	nontarget
Ahctf1	ENSMUSG00000026491				NA	NA	NA	NA	NA	wo.orthology	DAZL.target
Ahcy	ENSMUSG00000027597	YER043C		ortholog_one2many	73.8426	71.0468	NA	NA	1	w.orthology	nontarget
Ahcyl1	ENSMUSG00000027893	YER043C		ortholog_one2many	41.3208	48.7751	NA	NA	1	w.orthology	DAZL.target
Ahcyl2	ENSMUSG00000029772	YER043C		ortholog_one2many	35.7259	48.7751	NA	NA	1	w.orthology	nontarget
Ahdc1	ENSMUSG00000037692				NA	NA	NA	NA	NA	wo.orthology	DAZL.target
Ahi1	ENSMUSG00000019986				NA	NA	NA	NA	NA	wo.orthology	DAZL.target
Ahnak	ENSMUSG00000069833				NA	NA	NA	NA	NA	wo.orthology	nontarget
Ahr	ENSMUSG00000019256				NA	NA	NA	NA	NA	wo.orthology	nontarget
Ahsa1	ENSMUSG00000021037				NA	NA	NA	NA	NA	wo.orthology	nontarget
Ahsa2	ENSMUSG00000020288	YDR214W		ortholog_one2many	23.8671	22.5714	NA	NA	0	w.orthology	DAZL.target
Ahsg	ENSMUSG00000022868				NA	NA	NA	NA	NA	wo.orthology	nontarget
AI182371	ENSMUSG00000035875				NA	NA	NA	NA	NA	wo.orthology	nontarget
AI413582	ENSMUSG00000062753				NA	NA	NA	NA	NA	wo.orthology	nontarget
AI597479	ENSMUSG00000010290				NA	NA	NA	NA	NA	wo.orthology	DAZL.target
AI661453	ENSMUSG00000034382				NA	NA	NA	NA	NA	wo.orthology	nontarget
AI837181	ENSMUSG00000047423				NA	NA	NA	NA	NA	wo.orthology	nontarget
AI987944	ENSMUSG00000056383				NA	NA	NA	NA	NA	wo.orthology	nontarget
Aida	ENSMUSG00000042901				NA	NA	NA	NA	NA	wo.orthology	nontarget
Aif1	ENSMUSG00000024397				NA	NA	NA	NA	NA	wo.orthology	nontarget
Aifm1	ENSMUSG00000036932	YDR353W		ortholog_many2many	9.15033	17.5549	NA	NA	0	w.orthology	nontarget
Aifm1	ENSMUSG00000036932	YHR106W		ortholog_many2many	8.98693	16.0819	NA	NA	0	w.orthology	nontarget
Aifm2	ENSMUSG00000020085	YMR145C	NDE1	ortholog_one2many	17.1053	11.6071	NA	NA	0	w.orthology	nontarget
Aifm2	ENSMUSG00000020085	YDL085W	NDE2	ortholog_one2many	17.3684	12.1101	NA	NA	0	w.orthology	nontarget
Aifm3	ENSMUSG00000022763	YHR106W		ortholog_many2many	11.9008	21.0526	NA	NA	0	w.orthology	nontarget
Aifm3	ENSMUSG00000022763	YDR353W		ortholog_many2many	11.9008	22.5705	NA	NA	0	w.orthology	nontarget
Aig1	ENSMUSG00000019806				NA	NA	NA	NA	NA	wo.orthology	DAZL.target
Aim2	ENSMUSG00000037860				NA	NA	NA	NA	NA	wo.orthology	nontarget
Aimp1	ENSMUSG00000028029	YGL105W		ortholog_one2one	31.348	26.5957	NA	NA	1	w.orthology	nontarget
Aimp2	ENSMUSG00000029610				NA	NA	NA	NA	NA	wo.orthology	nontarget
Aip	ENSMUSG00000097319				NA	NA	NA	NA	NA	wo.orthology	nontarget
Aip	ENSMUSG00000024847				NA	NA	NA	NA	NA	wo.orthology	nontarget
Aipl1	ENSMUSG00000040554				NA	NA	NA	NA	NA	wo.orthology	nontarget
Ajap1	ENSMUSG00000039546				NA	NA	NA	NA	NA	wo.orthology	nontarget
Ajuba	ENSMUSG00000022178				NA	NA	NA	NA	NA	wo.orthology	DAZL.target
Ak2	ENSMUSG00000028792	YDR226W	ADK1	ortholog_one2one	53.1381	57.2072	NA	NA	1	w.orthology	DAZL.target
Ak3	ENSMUSG00000024782				NA	NA	NA	NA	NA	wo.orthology	nontarget
Ak4	ENSMUSG00000028527				NA	NA	NA	NA	NA	wo.orthology	DAZL.target
Ak5	ENSMUSG00000039058				NA	NA	NA	NA	NA	wo.orthology	nontarget
Ak6	ENSMUSG00000078941	YMR236W	TAF9	ortholog_one2many	17.4242	29.2994	NA	NA	0	w.orthology	nontarget
Ak7	ENSMUSG00000041323				NA	NA	NA	NA	NA	wo.orthology	nontarget
Ak8	ENSMUSG00000026807				NA	NA	NA	NA	NA	wo.orthology	nontarget
Akap1	ENSMUSG00000018428				NA	NA	NA	NA	NA	wo.orthology	nontarget
Akap10	ENSMUSG00000047804	YOR301W		ortholog_one2one	9.66767	14.7126	NA	NA	0	w.orthology	nontarget
Akap11	ENSMUSG00000022016				NA	NA	NA	NA	NA	wo.orthology	DAZL.target
Akap12	ENSMUSG00000038587				NA	NA	NA	NA	NA	wo.orthology	nontarget
Akap13	ENSMUSG00000066406				NA	NA	NA	NA	NA	wo.orthology	DAZL.target
Akap17b	ENSMUSG00000059708				NA	NA	NA	NA	NA	wo.orthology	DAZL.target
Akap4	ENSMUSG00000050089				NA	NA	NA	NA	NA	wo.orthology	nontarget
Akap5	ENSMUSG00000021057				NA	NA	NA	NA	NA	wo.orthology	nontarget
Akap6	ENSMUSG00000061603				NA	NA	NA	NA	NA	wo.orthology	nontarget
Akap7	ENSMUSG00000039166				NA	NA	NA	NA	NA	wo.orthology	nontarget
Akap8	ENSMUSG00000024045				NA	NA	NA	NA	NA	wo.orthology	DAZL.target
Akap8l	ENSMUSG00000002625				NA	NA	NA	NA	NA	wo.orthology	nontarget
Akap9	ENSMUSG00000040407				NA	NA	NA	NA	NA	wo.orthology	nontarget
Akip1	ENSMUSG00000031023				NA	NA	NA	NA	NA	wo.orthology	nontarget
Akirin1	ENSMUSG00000023075				NA	NA	NA	NA	NA	wo.orthology	DAZL.target
Akirin2	ENSMUSG00000028291				NA	NA	NA	NA	NA	wo.orthology	DAZL.target
Akna	ENSMUSG00000039158				NA	NA	NA	NA	NA	wo.orthology	nontarget
Akr1a1	ENSMUSG00000028692	YOL165C		ortholog_many2many	2.15385	4.8951	NA	NA	0	w.orthology	nontarget
Akr1a1	ENSMUSG00000028692	YDR368W		ortholog_many2many	37.2308	38.7821	NA	NA	0	w.orthology	nontarget
Akr1a1	ENSMUSG00000028692	YDL243C		ortholog_many2many	12.6154	12.462	NA	NA	0	w.orthology	nontarget
Akr1a1	ENSMUSG00000028692	YNL331C		ortholog_many2many	13.2308	11.4362	NA	NA	0	w.orthology	nontarget
Akr1a1	ENSMUSG00000028692	YOR120W	GCY1	ortholog_many2many	39.0769	40.7051	NA	NA	0	w.orthology	nontarget
Akr1a1	ENSMUSG00000028692	YJR155W		ortholog_many2many	8.92308	10.0694	NA	NA	0	w.orthology	nontarget
Akr1a1	ENSMUSG00000028692	YCR107W		ortholog_many2many	11.3846	10.1928	NA	NA	0	w.orthology	nontarget
Akr1b10	ENSMUSG00000061758	YJR155W		ortholog_many2many	9.17722	10.0694	NA	NA	0	w.orthology	nontarget
Akr1b10	ENSMUSG00000061758	YNL331C		ortholog_many2many	13.6076	11.4362	NA	NA	0	w.orthology	nontarget
Akr1b10	ENSMUSG00000061758	YOR120W	GCY1	ortholog_many2many	41.1392	41.6667	NA	NA	0	w.orthology	nontarget
Akr1b10	ENSMUSG00000061758	YDR368W		ortholog_many2many	38.924	39.4231	NA	NA	0	w.orthology	nontarget
Akr1b10	ENSMUSG00000061758	YDL243C		ortholog_many2many	12.9747	12.462	NA	NA	0	w.orthology	nontarget
Akr1b10	ENSMUSG00000061758	YMR041C		ortholog_many2many	12.0253	11.3433	NA	NA	0	w.orthology	nontarget
Akr1b10	ENSMUSG00000061758	YOL165C		ortholog_many2many	3.16456	6.99301	NA	NA	0	w.orthology	nontarget
Akr1b10	ENSMUSG00000061758	YDL124W		ortholog_many2many	24.3671	24.6795	NA	NA	0	w.orthology	nontarget
Akr1b10	ENSMUSG00000061758	YCR107W		ortholog_many2many	13.6076	11.8457	NA	NA	0	w.orthology	nontarget
Akr1b3	ENSMUSG00000001642	YCR107W		ortholog_many2many	12.3418	10.7438	NA	NA	0	w.orthology	nontarget
Akr1b3	ENSMUSG00000001642	YDR368W		ortholog_many2many	40.5063	41.0256	NA	NA	0	w.orthology	nontarget
Akr1b3	ENSMUSG00000001642	YJR155W		ortholog_many2many	8.5443	9.375	NA	NA	0	w.orthology	nontarget
Akr1b3	ENSMUSG00000001642	YDL243C		ortholog_many2many	11.7089	11.2462	NA	NA	0	w.orthology	nontarget
Akr1b3	ENSMUSG00000001642	YOL165C		ortholog_many2many	3.16456	6.99301	NA	NA	0	w.orthology	nontarget
Akr1b3	ENSMUSG00000001642	YOR120W	GCY1	ortholog_many2many	41.1392	41.6667	NA	NA	0	w.orthology	nontarget
Akr1b3	ENSMUSG00000001642	YNL331C		ortholog_many2many	11.7089	9.84043	NA	NA	0	w.orthology	nontarget
Akr1b7	ENSMUSG00000052131	YJR155W		ortholog_many2many	8.86076	9.72222	NA	NA	0	w.orthology	nontarget
Akr1b7	ENSMUSG00000052131	YDR368W		ortholog_many2many	39.2405	39.7436	NA	NA	0	w.orthology	nontarget
Akr1b7	ENSMUSG00000052131	YOR120W	GCY1	ortholog_many2many	40.8228	41.3462	NA	NA	0	w.orthology	nontarget
Akr1b7	ENSMUSG00000052131	YNL331C		ortholog_many2many	12.3418	10.3723	NA	NA	0	w.orthology	nontarget
Akr1b7	ENSMUSG00000052131	YDL124W		ortholog_many2many	25	25.3205	NA	NA	0	w.orthology	nontarget
Akr1b7	ENSMUSG00000052131	YDL243C		ortholog_many2many	12.6582	12.1581	NA	NA	0	w.orthology	nontarget
Akr1b7	ENSMUSG00000052131	YMR041C		ortholog_many2many	12.9747	12.2388	NA	NA	0	w.orthology	nontarget
Akr1b7	ENSMUSG00000052131	YOL165C		ortholog_many2many	2.53165	5.59441	NA	NA	0	w.orthology	nontarget
Akr1b7	ENSMUSG00000052131	YCR107W		ortholog_many2many	12.9747	11.2948	NA	NA	0	w.orthology	nontarget
Akr1b8	ENSMUSG00000029762	YJR155W		ortholog_many2many	8.86076	9.72222	NA	NA	0	w.orthology	nontarget
Akr1b8	ENSMUSG00000029762	YDR368W		ortholog_many2many	40.1899	40.7051	NA	NA	0	w.orthology	nontarget
Akr1b8	ENSMUSG00000029762	YDL243C		ortholog_many2many	12.3418	11.8541	NA	NA	0	w.orthology	nontarget
Akr1b8	ENSMUSG00000029762	YMR041C		ortholog_many2many	12.9747	12.2388	NA	NA	0	w.orthology	nontarget
Akr1b8	ENSMUSG00000029762	YOL165C		ortholog_many2many	3.48101	7.69231	NA	NA	0	w.orthology	nontarget
Akr1b8	ENSMUSG00000029762	YNL331C		ortholog_many2many	12.9747	10.9043	NA	NA	0	w.orthology	nontarget
Akr1b8	ENSMUSG00000029762	YDL124W		ortholog_many2many	25.3165	25.641	NA	NA	0	w.orthology	nontarget
Akr1b8	ENSMUSG00000029762	YCR107W		ortholog_many2many	13.6076	11.8457	NA	NA	0	w.orthology	nontarget
Akr1b8	ENSMUSG00000029762	YOR120W	GCY1	ortholog_many2many	41.4557	41.9872	NA	NA	0	w.orthology	nontarget
Akr1cl	ENSMUSG00000025955	YMR041C		ortholog_many2many	13.0435	12.5373	NA	NA	0	w.orthology	nontarget
Akr1cl	ENSMUSG00000025955	YOL165C		ortholog_many2many	3.41615	7.69231	NA	NA	0	w.orthology	nontarget
Akr1cl	ENSMUSG00000025955	YJR155W		ortholog_many2many	9.31677	10.4167	NA	NA	0	w.orthology	nontarget
Akr1cl	ENSMUSG00000025955	YDR368W		ortholog_many2many	37.8882	39.1026	NA	NA	0	w.orthology	nontarget
Akr1cl	ENSMUSG00000025955	YNL331C		ortholog_many2many	13.0435	11.1702	NA	NA	0	w.orthology	nontarget
Akr1cl	ENSMUSG00000025955	YOR120W	GCY1	ortholog_many2many	37.2671	38.4615	NA	NA	0	w.orthology	nontarget
Akr1cl	ENSMUSG00000025955	YDL243C		ortholog_many2many	12.7329	12.462	NA	NA	0	w.orthology	nontarget
Akr1cl	ENSMUSG00000025955	YCR107W		ortholog_many2many	13.9752	12.3967	NA	NA	0	w.orthology	nontarget
Akr1d1	ENSMUSG00000038641	YDR368W		ortholog_many2many	36.9231	38.4615	NA	NA	0	w.orthology	nontarget
Akr1d1	ENSMUSG00000038641	YJR155W		ortholog_many2many	9.23077	10.4167	NA	NA	0	w.orthology	nontarget
Akr1d1	ENSMUSG00000038641	YNL331C		ortholog_many2many	12.9231	11.1702	NA	NA	0	w.orthology	nontarget
Akr1d1	ENSMUSG00000038641	YDL243C		ortholog_many2many	12	11.8541	NA	NA	0	w.orthology	nontarget
Akr1d1	ENSMUSG00000038641	YOR120W	GCY1	ortholog_many2many	38.1538	39.7436	NA	NA	0	w.orthology	nontarget
Akr1d1	ENSMUSG00000038641	YOL165C		ortholog_many2many	3.07692	6.99301	NA	NA	0	w.orthology	nontarget
Akr1d1	ENSMUSG00000038641	YCR107W		ortholog_many2many	12.3077	11.0193	NA	NA	0	w.orthology	nontarget
Akr1e1	ENSMUSG00000045410	YDL243C		ortholog_many2many	12.9568	11.8541	NA	NA	0	w.orthology	nontarget
Akr1e1	ENSMUSG00000045410	YJR155W		ortholog_many2many	9.96678	10.4167	NA	NA	0	w.orthology	nontarget
Akr1e1	ENSMUSG00000045410	YNL331C		ortholog_many2many	12.2924	9.84043	NA	NA	0	w.orthology	nontarget
Akr1e1	ENSMUSG00000045410	YDR368W		ortholog_many2many	38.5382	37.1795	NA	NA	0	w.orthology	nontarget
Akr1e1	ENSMUSG00000045410	YOR120W	GCY1	ortholog_many2many	37.8738	36.5385	NA	NA	0	w.orthology	nontarget
Akr1e1	ENSMUSG00000045410	YOL165C		ortholog_many2many	2.99003	6.29371	NA	NA	0	w.orthology	nontarget
Akr1e1	ENSMUSG00000045410	YCR107W		ortholog_many2many	12.2924	10.1928	NA	NA	0	w.orthology	nontarget
Akr7a5	ENSMUSG00000028743	YCR107W		ortholog_many2many	16.0763	16.2534	NA	NA	0	w.orthology	nontarget
Akr7a5	ENSMUSG00000028743	YJR155W		ortholog_many2many	13.079	16.6667	NA	NA	0	w.orthology	nontarget
Akr7a5	ENSMUSG00000028743	YNL331C		ortholog_many2many	17.7112	17.2872	NA	NA	0	w.orthology	nontarget
Akr7a5	ENSMUSG00000028743	YOL165C		ortholog_many2many	4.90463	12.5874	NA	NA	0	w.orthology	nontarget
Akr7a5	ENSMUSG00000028743	YDL243C		ortholog_many2many	17.1662	19.1489	NA	NA	0	w.orthology	nontarget
Akr7a5	ENSMUSG00000028743	YDR368W		ortholog_many2many	14.4414	16.9872	NA	NA	0	w.orthology	nontarget
Akr7a5	ENSMUSG00000028743	YOR120W	GCY1	ortholog_many2many	15.5313	18.2692	NA	NA	0	w.orthology	nontarget
Akt1	ENSMUSG00000001729				NA	NA	NA	NA	NA	wo.orthology	nontarget
Akt1s1	ENSMUSG00000011096				NA	NA	NA	NA	NA	wo.orthology	nontarget
Akt2	ENSMUSG00000004056				NA	NA	NA	NA	NA	wo.orthology	nontarget
Akt3	ENSMUSG00000019699				NA	NA	NA	NA	NA	wo.orthology	DAZL.target
Aktip	ENSMUSG00000031667				NA	NA	NA	NA	NA	wo.orthology	nontarget
Alad	ENSMUSG00000028393	YGL040C	HEM2	ortholog_one2one	46.6667	45.0292	NA	NA	1	w.orthology	nontarget
Alas1	ENSMUSG00000032786	YDR062W	LCB2	ortholog_many2many	17.757	20.3209	NA	NA	0	w.orthology	nontarget
Alas2	ENSMUSG00000025270	YDR062W	LCB2	ortholog_many2many	20.4429	21.3904	NA	NA	0	w.orthology	nontarget
Alcam	ENSMUSG00000022636				NA	NA	NA	NA	NA	wo.orthology	nontarget
Aldh16a1	ENSMUSG00000007833	YER073W		ortholog_many2many	16.4589	25.3846	NA	NA	0	w.orthology	nontarget
Aldh16a1	ENSMUSG00000007833	YPL061W	ALD6	ortholog_many2many	14.7132	23.6	NA	NA	0	w.orthology	nontarget
Aldh16a1	ENSMUSG00000007833	YMR169C		ortholog_many2many	13.3416	21.1462	NA	NA	0	w.orthology	nontarget
Aldh16a1	ENSMUSG00000007833	YMR170C		ortholog_many2many	13.9651	22.1344	NA	NA	0	w.orthology	nontarget
Aldh16a1	ENSMUSG00000007833	YOR374W	ALD4	ortholog_many2many	14.4638	22.3507	NA	NA	0	w.orthology	nontarget
Aldh18a1	ENSMUSG00000025007	YHR033W		ortholog_one2many	15.4717	29.078	NA	NA	0	w.orthology	nontarget
Aldh18a1	ENSMUSG00000025007	YOR323C		ortholog_one2many	22.7673	39.693	NA	NA	0	w.orthology	nontarget
Aldh18a1	ENSMUSG00000025007	YDR300C		ortholog_one2many	15.9748	29.6729	NA	NA	0	w.orthology	nontarget
Aldh1a1	ENSMUSG00000053279	YMR170C		ortholog_many2many	46.1078	45.6522	NA	NA	0	w.orthology	nontarget
Aldh1a1	ENSMUSG00000053279	YMR169C		ortholog_many2many	45.7086	45.2569	NA	NA	0	w.orthology	nontarget
Aldh1a1	ENSMUSG00000053279	YOR374W	ALD4	ortholog_many2many	47.1058	45.4721	NA	NA	0	w.orthology	nontarget
Aldh1a1	ENSMUSG00000053279	YER073W		ortholog_many2many	47.3054	45.5769	NA	NA	0	w.orthology	nontarget
Aldh1a1	ENSMUSG00000053279	YPL061W	ALD6	ortholog_many2many	44.1118	44.2	NA	NA	0	w.orthology	nontarget
Aldh1a2	ENSMUSG00000013584	YPL061W	ALD6	ortholog_many2many	44.0154	45.6	NA	NA	0	w.orthology	DAZL.target
Aldh1a2	ENSMUSG00000013584	YOR374W	ALD4	ortholog_many2many	47.1042	47.0135	NA	NA	0	w.orthology	DAZL.target
Aldh1a2	ENSMUSG00000013584	YMR170C		ortholog_many2many	44.7876	45.8498	NA	NA	0	w.orthology	DAZL.target
Aldh1a2	ENSMUSG00000013584	YMR169C		ortholog_many2many	45.1737	46.2451	NA	NA	0	w.orthology	DAZL.target
Aldh1a2	ENSMUSG00000013584	YER073W		ortholog_many2many	46.7181	46.5385	NA	NA	0	w.orthology	DAZL.target
Aldh1a3	ENSMUSG00000015134	YMR170C		ortholog_many2many	45.8984	46.4427	NA	NA	0	w.orthology	nontarget
Aldh1a3	ENSMUSG00000015134	YMR169C		ortholog_many2many	45.3125	45.8498	NA	NA	0	w.orthology	nontarget
Aldh1a3	ENSMUSG00000015134	YPL061W	ALD6	ortholog_many2many	45.7031	46.8	NA	NA	0	w.orthology	nontarget
Aldh1a3	ENSMUSG00000015134	YOR374W	ALD4	ortholog_many2many	47.4609	46.8208	NA	NA	0	w.orthology	nontarget
Aldh1b1	ENSMUSG00000035561	YER073W		ortholog_many2many	44.7013	44.6154	NA	NA	0	w.orthology	nontarget
Aldh1b1	ENSMUSG00000035561	YMR170C		ortholog_many2many	44.7013	45.8498	NA	NA	0	w.orthology	nontarget
Aldh1b1	ENSMUSG00000035561	YMR169C		ortholog_many2many	43.9306	45.0593	NA	NA	0	w.orthology	nontarget
Aldh1b1	ENSMUSG00000035561	YOR374W	ALD4	ortholog_many2many	48.1696	48.1696	NA	NA	0	w.orthology	nontarget
Aldh1b1	ENSMUSG00000035561	YMR110C		ortholog_many2many	18.8825	18.4211	NA	NA	0	w.orthology	nontarget
Aldh1b1	ENSMUSG00000035561	YPL061W	ALD6	ortholog_many2many	44.1233	45.8	NA	NA	0	w.orthology	nontarget
Aldh1l1	ENSMUSG00000030088	YOR374W	ALD4	ortholog_many2many	24.5011	42.5819	NA	NA	0	w.orthology	nontarget
Aldh1l1	ENSMUSG00000030088	YMR170C		ortholog_many2many	23.6142	42.0949	NA	NA	0	w.orthology	nontarget
Aldh1l1	ENSMUSG00000030088	YMR169C		ortholog_many2many	22.7273	40.5138	NA	NA	0	w.orthology	nontarget
Aldh1l1	ENSMUSG00000030088	YER073W		ortholog_many2many	26.4967	45.9615	NA	NA	0	w.orthology	nontarget
Aldh1l1	ENSMUSG00000030088	YPL061W	ALD6	ortholog_many2many	22.7273	41	NA	NA	0	w.orthology	nontarget
Aldh1l2	ENSMUSG00000020256	YOR374W	ALD4	ortholog_many2many	23.0769	41.0405	NA	NA	0	w.orthology	nontarget
Aldh1l2	ENSMUSG00000020256	YMR170C		ortholog_many2many	23.0769	42.0949	NA	NA	0	w.orthology	nontarget
Aldh1l2	ENSMUSG00000020256	YMR169C		ortholog_many2many	22.1018	40.3162	NA	NA	0	w.orthology	nontarget
Aldh1l2	ENSMUSG00000020256	YER073W		ortholog_many2many	23.9437	42.5	NA	NA	0	w.orthology	nontarget
Aldh1l2	ENSMUSG00000020256	YPL061W	ALD6	ortholog_many2many	21.8852	40.4	NA	NA	0	w.orthology	nontarget
Aldh2	ENSMUSG00000029455	YMR170C		ortholog_many2many	45.4721	46.6403	NA	NA	0	w.orthology	nontarget
Aldh2	ENSMUSG00000029455	YPL061W	ALD6	ortholog_many2many	44.7013	46.4	NA	NA	0	w.orthology	nontarget
Aldh2	ENSMUSG00000029455	YER073W		ortholog_many2many	45.6647	45.5769	NA	NA	0	w.orthology	nontarget
Aldh2	ENSMUSG00000029455	YOR374W	ALD4	ortholog_many2many	48.5549	48.5549	NA	NA	0	w.orthology	nontarget
Aldh2	ENSMUSG00000029455	YMR169C		ortholog_many2many	44.5087	45.6522	NA	NA	0	w.orthology	nontarget
Aldh3a2	ENSMUSG00000010025	YER073W		ortholog_many2many	21.9008	20.3846	NA	NA	0	w.orthology	DAZL.target
Aldh3a2	ENSMUSG00000010025	YMR170C		ortholog_many2many	25.8264	24.7036	NA	NA	0	w.orthology	DAZL.target
Aldh3a2	ENSMUSG00000010025	YPL061W	ALD6	ortholog_many2many	21.0744	20.4	NA	NA	0	w.orthology	DAZL.target
Aldh3a2	ENSMUSG00000010025	YMR169C		ortholog_many2many	24.7934	23.7154	NA	NA	0	w.orthology	DAZL.target
Aldh3a2	ENSMUSG00000010025	YOR374W	ALD4	ortholog_many2many	21.6942	20.2312	NA	NA	0	w.orthology	DAZL.target
Aldh4a1	ENSMUSG00000028737	YHR037W		ortholog_one2one	41.1032	40.1739	NA	NA	1	w.orthology	nontarget
Aldh5a1	ENSMUSG00000035936	YBR006W	UGA2	ortholog_one2one	44.5507	46.8813	NA	NA	1	w.orthology	nontarget
Aldh6a1	ENSMUSG00000021238	YMR169C		ortholog_many2many	25.0467	26.4822	NA	NA	0	w.orthology	nontarget
Aldh6a1	ENSMUSG00000021238	YPL061W	ALD6	ortholog_many2many	24.2991	26	NA	NA	0	w.orthology	nontarget
Aldh6a1	ENSMUSG00000021238	YMR170C		ortholog_many2many	25.7944	27.2727	NA	NA	0	w.orthology	nontarget
Aldh6a1	ENSMUSG00000021238	YOR374W	ALD4	ortholog_many2many	24.2991	25.0482	NA	NA	0	w.orthology	nontarget
Aldh7a1	ENSMUSG00000053644	YMR170C		ortholog_many2many	23.5622	25.0988	NA	NA	0	w.orthology	DAZL.target
Aldh7a1	ENSMUSG00000053644	YPL061W	ALD6	ortholog_many2many	25.0464	27	NA	NA	0	w.orthology	DAZL.target
Aldh7a1	ENSMUSG00000053644	YOR374W	ALD4	ortholog_many2many	22.6345	23.5067	NA	NA	0	w.orthology	DAZL.target
Aldh7a1	ENSMUSG00000053644	YMR169C		ortholog_many2many	23.7477	25.2964	NA	NA	0	w.orthology	DAZL.target
Aldh9a1	ENSMUSG00000026687	YPL061W	ALD6	ortholog_many2many	29.9228	31	NA	NA	0	w.orthology	nontarget
Aldh9a1	ENSMUSG00000026687	YMR169C		ortholog_many2many	33.3977	34.1897	NA	NA	0	w.orthology	nontarget
Aldh9a1	ENSMUSG00000026687	YMR170C		ortholog_many2many	33.5907	34.3874	NA	NA	0	w.orthology	nontarget
Aldh9a1	ENSMUSG00000026687	YOR374W	ALD4	ortholog_many2many	35.1351	35.0674	NA	NA	0	w.orthology	nontarget
Aldoa	ENSMUSG00000030695				NA	NA	NA	NA	NA	wo.orthology	nontarget
Aldoa	ENSMUSG00000114515				NA	NA	NA	NA	NA	wo.orthology	nontarget
Aldoc	ENSMUSG00000017390				NA	NA	NA	NA	NA	wo.orthology	nontarget
Alg1	ENSMUSG00000039427	YBR110W		ortholog_one2one	31.3278	33.6303	NA	NA	1	w.orthology	nontarget
Alg10b	ENSMUSG00000075470	YGR227W	DIE2	ortholog_one2one	28.0591	25.3333	NA	NA	1	w.orthology	DAZL.target
Alg11	ENSMUSG00000063362	YNL048W		ortholog_one2one	34.9594	31.3869	NA	NA	1	w.orthology	nontarget
Alg12	ENSMUSG00000035845	YNR030W	ALG12	ortholog_one2one	32.0988	28.3122	NA	NA	1	w.orthology	nontarget
Alg13	ENSMUSG00000041718	YGL047W		ortholog_one2many	32.1212	26.2376	NA	NA	1	w.orthology	nontarget
Alg14	ENSMUSG00000039887	YBR070C		ortholog_one2one	35.023	32.0675	NA	NA	1	w.orthology	nontarget
Alg2	ENSMUSG00000039740	YGL065C		ortholog_one2one	38.5542	31.8091	NA	NA	1	w.orthology	DAZL.target
Alg3	ENSMUSG00000033809	YBL082C	ALG3	ortholog_one2one	34.9315	33.4061	NA	NA	1	w.orthology	nontarget
Alg5	ENSMUSG00000036632	YPL227C		ortholog_one2one	39.8148	38.6228	NA	NA	1	w.orthology	nontarget
Alg6	ENSMUSG00000073792	YOR002W		ortholog_one2one	36.2919	33.8235	NA	NA	1	w.orthology	nontarget
Alg6	ENSMUSG00000116382				NA	NA	NA	NA	NA	w.orthology	nontarget
Alg8	ENSMUSG00000035704	YOR067C	ALG8	ortholog_one2one	38.7833	35.3553	NA	NA	1	w.orthology	nontarget
Alg9	ENSMUSG00000032059	YNL219C		ortholog_one2one	30.4419	33.5135	NA	NA	1	w.orthology	nontarget
Alkbh1	ENSMUSG00000079036				NA	NA	NA	NA	NA	wo.orthology	DAZL.target
Alkbh2	ENSMUSG00000044339				NA	NA	NA	NA	NA	wo.orthology	nontarget
Alkbh3	ENSMUSG00000040174				NA	NA	NA	NA	NA	wo.orthology	nontarget
Alkbh4	ENSMUSG00000039754				NA	NA	NA	NA	NA	wo.orthology	nontarget
Alkbh5	ENSMUSG00000042650				NA	NA	NA	NA	NA	wo.orthology	DAZL.target
Alkbh6	ENSMUSG00000042831				NA	NA	NA	NA	NA	wo.orthology	nontarget
Alkbh7	ENSMUSG00000002661				NA	NA	NA	NA	NA	wo.orthology	nontarget
Alkbh8	ENSMUSG00000025899	YML014W	TRM9	ortholog_one2one	15.6627	37.276	NA	NA	0	w.orthology	nontarget
Alms1	ENSMUSG00000063810				NA	NA	NA	NA	NA	wo.orthology	nontarget
Alox12	ENSMUSG00000000320				NA	NA	NA	NA	NA	wo.orthology	nontarget
Alox12b	ENSMUSG00000032807				NA	NA	NA	NA	NA	wo.orthology	nontarget
Alox8	ENSMUSG00000020891				NA	NA	NA	NA	NA	wo.orthology	nontarget
Aloxe3	ENSMUSG00000020892				NA	NA	NA	NA	NA	wo.orthology	nontarget
Alpk1	ENSMUSG00000028028				NA	NA	NA	NA	NA	wo.orthology	nontarget
Alpl	ENSMUSG00000028766	YDR481C	PHO8	ortholog_one2many	26.9084	24.9117	NA	NA	0	w.orthology	nontarget
Als2	ENSMUSG00000026024	YLR077W	FMP25	ortholog_many2many	5.57238	15.7804	NA	NA	0	w.orthology	DAZL.target
Als2	ENSMUSG00000026024	YGL097W	SRM1	ortholog_many2many	6.05694	20.7469	NA	NA	0	w.orthology	DAZL.target
Als2cl	ENSMUSG00000044037				NA	NA	NA	NA	NA	wo.orthology	nontarget
Alyref	ENSMUSG00000025134				NA	NA	NA	NA	NA	wo.orthology	nontarget
Alyref2	ENSMUSG00000060244				NA	NA	NA	NA	NA	wo.orthology	nontarget
Amacr	ENSMUSG00000022244				NA	NA	NA	NA	NA	wo.orthology	nontarget
Ambra1	ENSMUSG00000040506				NA	NA	NA	NA	NA	wo.orthology	nontarget
Amd1	ENSMUSG00000075232	YOL052C		ortholog_one2many	19.4611	16.4141	NA	NA	0	w.orthology	nontarget
Amdhd2	ENSMUSG00000036820				NA	NA	NA	NA	NA	wo.orthology	nontarget
Amer1	ENSMUSG00000050332				NA	NA	NA	NA	NA	wo.orthology	nontarget
Amfr	ENSMUSG00000031751				NA	NA	NA	NA	NA	wo.orthology	DAZL.target
Amh	ENSMUSG00000035262				NA	NA	NA	NA	NA	wo.orthology	nontarget
Amhr2	ENSMUSG00000023047				NA	NA	NA	NA	NA	wo.orthology	nontarget
Amigo1	ENSMUSG00000050947				NA	NA	NA	NA	NA	wo.orthology	nontarget
Amigo2	ENSMUSG00000048218				NA	NA	NA	NA	NA	wo.orthology	nontarget
Amigo3	ENSMUSG00000032593				NA	NA	NA	NA	NA	wo.orthology	nontarget
Ammecr1	ENSMUSG00000042225	YOR289W		ortholog_one2many	22.093	30.2789	NA	NA	0	w.orthology	nontarget
Ammecr1l	ENSMUSG00000041915	YOR289W		ortholog_one2many	26.129	32.2709	NA	NA	1	w.orthology	DAZL.target
Amn1	ENSMUSG00000068250				NA	NA	NA	NA	NA	wo.orthology	nontarget
Amot	ENSMUSG00000041688				NA	NA	NA	NA	NA	wo.orthology	DAZL.target
Amotl1	ENSMUSG00000013076				NA	NA	NA	NA	NA	wo.orthology	nontarget
Amotl2	ENSMUSG00000032531				NA	NA	NA	NA	NA	wo.orthology	DAZL.target
Ampd2	ENSMUSG00000027889	YBR284W		ortholog_many2many	24.1505	24.9686	NA	NA	0	w.orthology	DAZL.target
Ampd2	ENSMUSG00000027889	YJL070C		ortholog_many2many	25.9709	24.0991	NA	NA	0	w.orthology	DAZL.target
Ampd3	ENSMUSG00000005686	YJL070C		ortholog_many2many	25.8486	22.2973	NA	NA	0	w.orthology	nontarget
Ampd3	ENSMUSG00000005686	YBR284W		ortholog_many2many	24.8042	23.8394	NA	NA	0	w.orthology	nontarget
Amph	ENSMUSG00000021314	YER114C	BOI2	ortholog_many2many	17.3913	11.5385	NA	NA	0	w.orthology	nontarget
Amph	ENSMUSG00000021314	YBL085W	BOI1	ortholog_many2many	19.2754	13.5714	NA	NA	0	w.orthology	nontarget
Amt	ENSMUSG00000032607	YDR019C	GCV1	ortholog_one2one	38.9578	39.25	NA	NA	1	w.orthology	nontarget
Amy1	ENSMUSG00000074264	YIL172C		ortholog_many2many	11.9374	10.3565	NA	NA	0	w.orthology	nontarget
Amy1	ENSMUSG00000074264	YJL216C		ortholog_many2many	11.546	10.1549	NA	NA	0	w.orthology	nontarget
Amy1	ENSMUSG00000074264	YJL221C	IMA4	ortholog_many2many	11.9374	10.3565	NA	NA	0	w.orthology	nontarget
Amy1	ENSMUSG00000074264	YGR292W	MAL12	ortholog_many2many	12.7202	11.1301	NA	NA	0	w.orthology	nontarget
Amy1	ENSMUSG00000074264	YGR287C		ortholog_many2many	11.546	10.017	NA	NA	0	w.orthology	nontarget
Amy1	ENSMUSG00000074264	YBR299W	MAL32	ortholog_many2many	12.5245	10.9589	NA	NA	0	w.orthology	nontarget
Amy1	ENSMUSG00000074264	YOL157C		ortholog_many2many	11.9374	10.3565	NA	NA	0	w.orthology	nontarget
Amy2a2	ENSMUSG00000096569	YOL157C		ortholog_many2many	11.2205	9.67742	NA	NA	0	w.orthology	nontarget
Amy2a2	ENSMUSG00000096569	YGR287C		ortholog_many2many	10.8268	9.33786	NA	NA	0	w.orthology	nontarget
Amy2a2	ENSMUSG00000096569	YJL216C		ortholog_many2many	11.6142	10.1549	NA	NA	0	w.orthology	nontarget
Amy2a2	ENSMUSG00000096569	YGR292W	MAL12	ortholog_many2many	12.2047	10.6164	NA	NA	0	w.orthology	nontarget
Amy2a2	ENSMUSG00000096569	YBR299W	MAL32	ortholog_many2many	12.2047	10.6164	NA	NA	0	w.orthology	nontarget
Amy2a2	ENSMUSG00000096569	YJL221C	IMA4	ortholog_many2many	11.2205	9.67742	NA	NA	0	w.orthology	nontarget
Amy2a2	ENSMUSG00000096569	YIL172C		ortholog_many2many	11.2205	9.67742	NA	NA	0	w.orthology	nontarget
Amy2a3	ENSMUSG00000093931	YGR287C		ortholog_many2many	10.8268	9.33786	NA	NA	0	w.orthology	nontarget
Amy2a3	ENSMUSG00000093931	YBR299W	MAL32	ortholog_many2many	12.2047	10.6164	NA	NA	0	w.orthology	nontarget
Amy2a3	ENSMUSG00000093931	YJL216C		ortholog_many2many	11.6142	10.1549	NA	NA	0	w.orthology	nontarget
Amy2a3	ENSMUSG00000093931	YOL157C		ortholog_many2many	11.2205	9.67742	NA	NA	0	w.orthology	nontarget
Amy2a3	ENSMUSG00000093931	YJL221C	IMA4	ortholog_many2many	11.2205	9.67742	NA	NA	0	w.orthology	nontarget
Amy2a3	ENSMUSG00000093931	YIL172C		ortholog_many2many	11.2205	9.67742	NA	NA	0	w.orthology	nontarget
Amy2a3	ENSMUSG00000093931	YGR292W	MAL12	ortholog_many2many	12.2047	10.6164	NA	NA	0	w.orthology	nontarget
Amy2a4	ENSMUSG00000096770	YBR299W	MAL32	ortholog_many2many	12.2047	10.6164	NA	NA	0	w.orthology	nontarget
Amy2a4	ENSMUSG00000096770	YIL172C		ortholog_many2many	11.2205	9.67742	NA	NA	0	w.orthology	nontarget
Amy2a4	ENSMUSG00000096770	YJL216C		ortholog_many2many	11.6142	10.1549	NA	NA	0	w.orthology	nontarget
Amy2a4	ENSMUSG00000096770	YJL221C	IMA4	ortholog_many2many	11.2205	9.67742	NA	NA	0	w.orthology	nontarget
Amy2a4	ENSMUSG00000096770	YGR287C		ortholog_many2many	10.8268	9.33786	NA	NA	0	w.orthology	nontarget
Amy2a4	ENSMUSG00000096770	YOL157C		ortholog_many2many	11.2205	9.67742	NA	NA	0	w.orthology	nontarget
Amy2a4	ENSMUSG00000096770	YGR292W	MAL12	ortholog_many2many	12.2047	10.6164	NA	NA	0	w.orthology	nontarget
Amz2	ENSMUSG00000020610				NA	NA	NA	NA	NA	wo.orthology	nontarget
Anapc1	ENSMUSG00000014355	YNL172W		ortholog_one2one	16.358	18.1922	NA	NA	0	w.orthology	DAZL.target
Anapc10	ENSMUSG00000036977	YGL240W	DOC1	ortholog_one2one	28.6486	21.2	NA	NA	0	w.orthology	DAZL.target
Anapc11	ENSMUSG00000025135	YDL008W		ortholog_one2one	42.8571	21.8182	NA	NA	0	w.orthology	DAZL.target
Anapc13	ENSMUSG00000035048				NA	NA	NA	NA	NA	wo.orthology	nontarget
Anapc15	ENSMUSG00000030649				NA	NA	NA	NA	NA	wo.orthology	nontarget
Anapc16	ENSMUSG00000020107				NA	NA	NA	NA	NA	wo.orthology	nontarget
Anapc2	ENSMUSG00000026965	YLR127C	APC2	ortholog_one2one	19.1159	18.7573	NA	NA	0	w.orthology	nontarget
Anapc4	ENSMUSG00000029176				NA	NA	NA	NA	NA	wo.orthology	nontarget
Anapc5	ENSMUSG00000029472	YOR249C	APC5	ortholog_one2one	15.2703	16.4964	NA	NA	0	w.orthology	nontarget
Anapc7	ENSMUSG00000029466				NA	NA	NA	NA	NA	wo.orthology	nontarget
Angel1	ENSMUSG00000021257	YMR285C		ortholog_many2many	13.1934	17.0874	NA	NA	0	w.orthology	DAZL.target
Angel1	ENSMUSG00000021257	YML118W		ortholog_many2many	13.6432	18.0198	NA	NA	0	w.orthology	DAZL.target
Angel1	ENSMUSG00000021257	YAL021C	CCR4	ortholog_many2many	13.4933	10.7527	NA	NA	0	w.orthology	DAZL.target
Angel2	ENSMUSG00000026634	YMR285C		ortholog_many2many	15.8088	16.699	NA	NA	0	w.orthology	DAZL.target
Angel2	ENSMUSG00000026634	YML118W		ortholog_many2many	14.8897	16.0396	NA	NA	0	w.orthology	DAZL.target
Angpt2	ENSMUSG00000031465				NA	NA	NA	NA	NA	wo.orthology	nontarget
Angptl1	ENSMUSG00000033544				NA	NA	NA	NA	NA	wo.orthology	nontarget
Angptl2	ENSMUSG00000004105				NA	NA	NA	NA	NA	wo.orthology	nontarget
Angptl3	ENSMUSG00000028553				NA	NA	NA	NA	NA	wo.orthology	nontarget
Angptl4	ENSMUSG00000002289				NA	NA	NA	NA	NA	wo.orthology	nontarget
Angptl6	ENSMUSG00000038742				NA	NA	NA	NA	NA	wo.orthology	nontarget
Angptl7	ENSMUSG00000028989				NA	NA	NA	NA	NA	wo.orthology	nontarget
Ank	ENSMUSG00000022265				NA	NA	NA	NA	NA	wo.orthology	DAZL.target
Ank1	ENSMUSG00000031543				NA	NA	NA	NA	NA	wo.orthology	nontarget
Ank2	ENSMUSG00000032826				NA	NA	NA	NA	NA	wo.orthology	nontarget
Ank3	ENSMUSG00000069601				NA	NA	NA	NA	NA	wo.orthology	nontarget
Ankef1	ENSMUSG00000074771				NA	NA	NA	NA	NA	wo.orthology	nontarget
Ankfy1	ENSMUSG00000020790	YKL020C		ortholog_one2one	14.9701	16.1738	NA	NA	0	w.orthology	DAZL.target
Ankhd1	ENSMUSG00000024483				NA	NA	NA	NA	NA	wo.orthology	nontarget
Ankib1	ENSMUSG00000040351				NA	NA	NA	NA	NA	wo.orthology	nontarget
Ankle1	ENSMUSG00000046295				NA	NA	NA	NA	NA	wo.orthology	nontarget
Ankle2	ENSMUSG00000029501				NA	NA	NA	NA	NA	wo.orthology	nontarget
Ankmy2	ENSMUSG00000036188				NA	NA	NA	NA	NA	wo.orthology	nontarget
Ankra2	ENSMUSG00000021661				NA	NA	NA	NA	NA	wo.orthology	nontarget
Ankrd10	ENSMUSG00000031508				NA	NA	NA	NA	NA	wo.orthology	DAZL.target
Ankrd11	ENSMUSG00000035569				NA	NA	NA	NA	NA	wo.orthology	nontarget
Ankrd12	ENSMUSG00000034647				NA	NA	NA	NA	NA	wo.orthology	DAZL.target
Ankrd13a	ENSMUSG00000041870				NA	NA	NA	NA	NA	wo.orthology	nontarget
Ankrd13b	ENSMUSG00000037907				NA	NA	NA	NA	NA	wo.orthology	nontarget
Ankrd13c	ENSMUSG00000039988				NA	NA	NA	NA	NA	wo.orthology	DAZL.target
Ankrd13d	ENSMUSG00000005986				NA	NA	NA	NA	NA	wo.orthology	nontarget
Ankrd16	ENSMUSG00000047909				NA	NA	NA	NA	NA	wo.orthology	nontarget
Ankrd17	ENSMUSG00000055204				NA	NA	NA	NA	NA	wo.orthology	DAZL.target
Ankrd23	ENSMUSG00000067653				NA	NA	NA	NA	NA	wo.orthology	nontarget
Ankrd24	ENSMUSG00000054708				NA	NA	NA	NA	NA	wo.orthology	nontarget
Ankrd26	ENSMUSG00000007827				NA	NA	NA	NA	NA	wo.orthology	nontarget
Ankrd27	ENSMUSG00000034867				NA	NA	NA	NA	NA	wo.orthology	nontarget
Ankrd28	ENSMUSG00000014496				NA	NA	NA	NA	NA	wo.orthology	nontarget
Ankrd29	ENSMUSG00000057766				NA	NA	NA	NA	NA	wo.orthology	DAZL.target
Ankrd34b	ENSMUSG00000045034				NA	NA	NA	NA	NA	wo.orthology	nontarget
Ankrd36	ENSMUSG00000020481				NA	NA	NA	NA	NA	wo.orthology	nontarget
Ankrd37	ENSMUSG00000050914				NA	NA	NA	NA	NA	wo.orthology	nontarget
Ankrd39	ENSMUSG00000079610				NA	NA	NA	NA	NA	wo.orthology	nontarget
Ankrd40	ENSMUSG00000020864				NA	NA	NA	NA	NA	wo.orthology	nontarget
Ankrd42	ENSMUSG00000041343				NA	NA	NA	NA	NA	wo.orthology	nontarget
Ankrd44	ENSMUSG00000052331				NA	NA	NA	NA	NA	wo.orthology	nontarget
Ankrd45	ENSMUSG00000044835				NA	NA	NA	NA	NA	wo.orthology	DAZL.target
Ankrd46	ENSMUSG00000048307				NA	NA	NA	NA	NA	wo.orthology	DAZL.target
Ankrd49	ENSMUSG00000031931				NA	NA	NA	NA	NA	wo.orthology	nontarget
Ankrd50	ENSMUSG00000044864				NA	NA	NA	NA	NA	wo.orthology	nontarget
Ankrd52	ENSMUSG00000014498				NA	NA	NA	NA	NA	wo.orthology	nontarget
Ankrd54	ENSMUSG00000033055				NA	NA	NA	NA	NA	wo.orthology	nontarget
Ankrd6	ENSMUSG00000040183				NA	NA	NA	NA	NA	wo.orthology	nontarget
Ankrd61	ENSMUSG00000029607				NA	NA	NA	NA	NA	wo.orthology	nontarget
Ankrd66	ENSMUSG00000096140				NA	NA	NA	NA	NA	wo.orthology	nontarget
Ankrd9	ENSMUSG00000037904				NA	NA	NA	NA	NA	wo.orthology	nontarget
Anks1	ENSMUSG00000024219				NA	NA	NA	NA	NA	wo.orthology	nontarget
Anks1b	ENSMUSG00000058589				NA	NA	NA	NA	NA	wo.orthology	nontarget
Anks3	ENSMUSG00000022515				NA	NA	NA	NA	NA	wo.orthology	nontarget
Ankub1	ENSMUSG00000074591				NA	NA	NA	NA	NA	wo.orthology	nontarget
Ankzf1	ENSMUSG00000026199	YDR049W		ortholog_one2one	18.3155	21.6772	NA	NA	0	w.orthology	nontarget
Anln	ENSMUSG00000036777				NA	NA	NA	NA	NA	wo.orthology	DAZL.target
Ano1	ENSMUSG00000031075				NA	NA	NA	NA	NA	wo.orthology	nontarget
Ano10	ENSMUSG00000037949				NA	NA	NA	NA	NA	wo.orthology	nontarget
Ano3	ENSMUSG00000074968				NA	NA	NA	NA	NA	wo.orthology	nontarget
Ano6	ENSMUSG00000064210				NA	NA	NA	NA	NA	wo.orthology	nontarget
Anp32a	ENSMUSG00000032249				NA	NA	NA	NA	NA	wo.orthology	nontarget
Anp32b	ENSMUSG00000028333				NA	NA	NA	NA	NA	wo.orthology	nontarget
Anp32e	ENSMUSG00000015749				NA	NA	NA	NA	NA	wo.orthology	DAZL.target
Anpep	ENSMUSG00000039062				NA	NA	NA	NA	NA	wo.orthology	nontarget
Antxr1	ENSMUSG00000033420				NA	NA	NA	NA	NA	wo.orthology	nontarget
Antxr2	ENSMUSG00000029338				NA	NA	NA	NA	NA	wo.orthology	nontarget
Anxa11	ENSMUSG00000021866				NA	NA	NA	NA	NA	wo.orthology	nontarget
Anxa13	ENSMUSG00000116372				NA	NA	NA	NA	NA	wo.orthology	nontarget
Anxa13	ENSMUSG00000055114				NA	NA	NA	NA	NA	wo.orthology	nontarget
Anxa2	ENSMUSG00000032231				NA	NA	NA	NA	NA	wo.orthology	nontarget
Anxa4	ENSMUSG00000029994				NA	NA	NA	NA	NA	wo.orthology	nontarget
Anxa5	ENSMUSG00000027712				NA	NA	NA	NA	NA	wo.orthology	nontarget
Anxa7	ENSMUSG00000021814				NA	NA	NA	NA	NA	wo.orthology	DAZL.target
Anxa9	ENSMUSG00000015702				NA	NA	NA	NA	NA	wo.orthology	nontarget
Aoc2	ENSMUSG00000078651				NA	NA	NA	NA	NA	wo.orthology	nontarget
Aox4	ENSMUSG00000038242				NA	NA	NA	NA	NA	wo.orthology	nontarget
Ap1ar	ENSMUSG00000074238				NA	NA	NA	NA	NA	wo.orthology	DAZL.target
Ap1b1	ENSMUSG00000009090				NA	NA	NA	NA	NA	wo.orthology	nontarget
Ap1g1	ENSMUSG00000031731	YPR029C		ortholog_one2many	31.8788	31.6106	NA	NA	1	w.orthology	DAZL.target
Ap1g2	ENSMUSG00000040701	YPR029C		ortholog_one2many	30.847	29.3269	NA	NA	1	w.orthology	nontarget
Ap1m1	ENSMUSG00000003033				NA	NA	NA	NA	NA	wo.orthology	nontarget
Ap1m2	ENSMUSG00000003309				NA	NA	NA	NA	NA	wo.orthology	nontarget
Ap1s1	ENSMUSG00000004849	YLR170C	APS1	ortholog_one2many	50.6329	51.2821	NA	NA	1	w.orthology	nontarget
Ap1s2	ENSMUSG00000031367	YLR170C	APS1	ortholog_one2many	51.25	52.5641	NA	NA	1	w.orthology	nontarget
Ap1s3	ENSMUSG00000054702	YLR170C	APS1	ortholog_one2many	48.0519	47.4359	NA	NA	1	w.orthology	nontarget
Ap2a1	ENSMUSG00000060279	YBL037W		ortholog_one2many	25.3838	24.1951	NA	NA	0	w.orthology	DAZL.target
Ap2a2	ENSMUSG00000002957	YBL037W		ortholog_one2many	26.4392	24.1951	NA	NA	0	w.orthology	nontarget
Ap2b1	ENSMUSG00000035152	YGR261C	APL6	ortholog_many2many	17.4553	20.5192	NA	NA	0	w.orthology	nontarget
Ap2m1	ENSMUSG00000022841	YOL062C	APM4	ortholog_one2one	33.7931	29.9389	NA	NA	1	w.orthology	nontarget
Ap2s1	ENSMUSG00000008036	YJR058C	APS2	ortholog_one2one	50	48.2993	NA	NA	1	w.orthology	nontarget
Ap3b1	ENSMUSG00000021686	YGR261C	APL6	ortholog_many2many	20	27.3177	NA	NA	0	w.orthology	nontarget
Ap3b2	ENSMUSG00000062444	YGR261C	APL6	ortholog_many2many	20.7024	27.6885	NA	NA	0	w.orthology	nontarget
Ap3d1	ENSMUSG00000020198	YPL195W	APL5	ortholog_one2one	21.4345	27.5751	NA	NA	0	w.orthology	nontarget
Ap3m1	ENSMUSG00000021824				NA	NA	NA	NA	NA	wo.orthology	nontarget
Ap3m2	ENSMUSG00000031539				NA	NA	NA	NA	NA	wo.orthology	nontarget
Ap3s1	ENSMUSG00000024480	YJL024C	APS3	ortholog_one2many	39.3782	39.1753	NA	NA	1	w.orthology	nontarget
Ap3s2	ENSMUSG00000063801	YJL024C	APS3	ortholog_one2many	38.342	38.1443	NA	NA	1	w.orthology	DAZL.target
Ap4b1	ENSMUSG00000032952	YGR261C	APL6	ortholog_many2many	17.3442	15.822	NA	NA	0	w.orthology	nontarget
Ap4e1	ENSMUSG00000001998				NA	NA	NA	NA	NA	wo.orthology	nontarget
Ap4m1	ENSMUSG00000019518				NA	NA	NA	NA	NA	wo.orthology	nontarget
Ap4s1	ENSMUSG00000020955	YJL024C	APS3	ortholog_one2many	40.2778	29.8969	NA	NA	1	w.orthology	nontarget
Ap5b1	ENSMUSG00000049562				NA	NA	NA	NA	NA	wo.orthology	nontarget
Ap5m1	ENSMUSG00000036291				NA	NA	NA	NA	NA	wo.orthology	nontarget
Ap5s1	ENSMUSG00000068264				NA	NA	NA	NA	NA	wo.orthology	nontarget
Ap5z1	ENSMUSG00000039623				NA	NA	NA	NA	NA	wo.orthology	nontarget
Apaf1	ENSMUSG00000019979				NA	NA	NA	NA	NA	wo.orthology	nontarget
Apba1	ENSMUSG00000024897				NA	NA	NA	NA	NA	wo.orthology	nontarget
Apba2	ENSMUSG00000030519				NA	NA	NA	NA	NA	wo.orthology	DAZL.target
Apba3	ENSMUSG00000004931				NA	NA	NA	NA	NA	wo.orthology	nontarget
Apbb1	ENSMUSG00000037032				NA	NA	NA	NA	NA	wo.orthology	nontarget
Apbb1ip	ENSMUSG00000026786				NA	NA	NA	NA	NA	wo.orthology	DAZL.target
Apbb2	ENSMUSG00000029207				NA	NA	NA	NA	NA	wo.orthology	nontarget
Apbb3	ENSMUSG00000117679				NA	NA	NA	NA	NA	wo.orthology	nontarget
Apc	ENSMUSG00000005871				NA	NA	NA	NA	NA	wo.orthology	DAZL.target
Apc2	ENSMUSG00000020135				NA	NA	NA	NA	NA	wo.orthology	nontarget
Apcdd1	ENSMUSG00000071847				NA	NA	NA	NA	NA	wo.orthology	nontarget
Apeh	ENSMUSG00000032590				NA	NA	NA	NA	NA	wo.orthology	nontarget
Apela	ENSMUSG00000079042				NA	NA	NA	NA	NA	wo.orthology	nontarget
Apex1	ENSMUSG00000035960	YBL019W	APN2	ortholog_one2many	27.1293	16.5385	NA	NA	0	w.orthology	DAZL.target
Apex2	ENSMUSG00000025269	YBL019W	APN2	ortholog_one2many	24.2248	24.0385	NA	NA	0	w.orthology	nontarget
Aph1a	ENSMUSG00000015750				NA	NA	NA	NA	NA	wo.orthology	nontarget
Aph1b	ENSMUSG00000032375				NA	NA	NA	NA	NA	wo.orthology	nontarget
Aph1c	ENSMUSG00000053040				NA	NA	NA	NA	NA	wo.orthology	nontarget
Api5	ENSMUSG00000027193				NA	NA	NA	NA	NA	wo.orthology	DAZL.target
Apip	ENSMUSG00000010911	YJR024C		ortholog_one2one	43.5685	43.0328	NA	NA	1	w.orthology	nontarget
Aplf	ENSMUSG00000030051				NA	NA	NA	NA	NA	wo.orthology	nontarget
Apln	ENSMUSG00000037010				NA	NA	NA	NA	NA	wo.orthology	nontarget
Aplp1	ENSMUSG00000006651				NA	NA	NA	NA	NA	wo.orthology	nontarget
Aplp2	ENSMUSG00000031996				NA	NA	NA	NA	NA	wo.orthology	DAZL.target
Apmap	ENSMUSG00000033096				NA	NA	NA	NA	NA	wo.orthology	nontarget
Apoa2	ENSMUSG00000005681				NA	NA	NA	NA	NA	wo.orthology	nontarget
Apobec1	ENSMUSG00000040613				NA	NA	NA	NA	NA	wo.orthology	nontarget
Apobec2	ENSMUSG00000116086				NA	NA	NA	NA	NA	wo.orthology	nontarget
Apobec2	ENSMUSG00000040694				NA	NA	NA	NA	NA	wo.orthology	nontarget
Apobec3	ENSMUSG00000009585				NA	NA	NA	NA	NA	wo.orthology	nontarget
Apobec4	ENSMUSG00000055547				NA	NA	NA	NA	NA	wo.orthology	nontarget
Apoc1	ENSMUSG00000040564				NA	NA	NA	NA	NA	wo.orthology	nontarget
Apoc2	ENSMUSG00000002992				NA	NA	NA	NA	NA	wo.orthology	nontarget
Apod	ENSMUSG00000022548				NA	NA	NA	NA	NA	wo.orthology	nontarget
Apoe	ENSMUSG00000002985				NA	NA	NA	NA	NA	wo.orthology	nontarget
Apof	ENSMUSG00000047631				NA	NA	NA	NA	NA	wo.orthology	nontarget
Apol6	ENSMUSG00000033576				NA	NA	NA	NA	NA	wo.orthology	nontarget
Apol7b	ENSMUSG00000068252				NA	NA	NA	NA	NA	wo.orthology	nontarget
Apold1	ENSMUSG00000090698				NA	NA	NA	NA	NA	wo.orthology	nontarget
Apoo	ENSMUSG00000079508				NA	NA	NA	NA	NA	wo.orthology	nontarget
Apool	ENSMUSG00000025525				NA	NA	NA	NA	NA	wo.orthology	nontarget
Apopt1	ENSMUSG00000037787				NA	NA	NA	NA	NA	wo.orthology	nontarget
App	ENSMUSG00000022892				NA	NA	NA	NA	NA	wo.orthology	nontarget
Appbp2	ENSMUSG00000018481				NA	NA	NA	NA	NA	wo.orthology	DAZL.target
Appl1	ENSMUSG00000040760				NA	NA	NA	NA	NA	wo.orthology	DAZL.target
Appl2	ENSMUSG00000020263				NA	NA	NA	NA	NA	wo.orthology	nontarget
Aprt	ENSMUSG00000006589				NA	NA	NA	NA	NA	wo.orthology	nontarget
Aptx	ENSMUSG00000028411	YOR258W		ortholog_one2one	17.8363	28.1106	NA	NA	0	w.orthology	nontarget
Aqp11	ENSMUSG00000042797				NA	NA	NA	NA	NA	wo.orthology	nontarget
Aqp5	ENSMUSG00000044217	YPR192W		ortholog_many2many	25.283	21.9672	NA	NA	0	w.orthology	nontarget
Aqp5	ENSMUSG00000044217	YLL052C		ortholog_many2many	6.79245	12.0805	NA	NA	0	w.orthology	nontarget
Aqp5	ENSMUSG00000044217	YLL043W		ortholog_many2many	22.2642	8.81913	NA	NA	0	w.orthology	nontarget
Aqp5	ENSMUSG00000044217	YLL053C		ortholog_many2many	16.2264	28.2895	NA	NA	0	w.orthology	nontarget
Aqp5	ENSMUSG00000044217	YFL054C		ortholog_many2many	23.7736	9.75232	NA	NA	0	w.orthology	nontarget
Aqp7	ENSMUSG00000028427	YLL043W		ortholog_many2many	30.363	13.7519	NA	NA	0	w.orthology	nontarget
Aqp7	ENSMUSG00000028427	YFL054C		ortholog_many2many	31.6832	14.8607	NA	NA	0	w.orthology	nontarget
Aqp9	ENSMUSG00000032204	YPR192W		ortholog_many2many	14.9533	15.7377	NA	NA	0	w.orthology	nontarget
Aqp9	ENSMUSG00000032204	YLL052C		ortholog_many2many	5.60748	12.0805	NA	NA	0	w.orthology	nontarget
Aqp9	ENSMUSG00000032204	YFL054C		ortholog_many2many	25.5452	12.6935	NA	NA	0	w.orthology	nontarget
Aqp9	ENSMUSG00000032204	YLL043W		ortholog_many2many	25.2336	12.1076	NA	NA	0	w.orthology	nontarget
Aqp9	ENSMUSG00000032204	YLL053C		ortholog_many2many	8.41121	17.7632	NA	NA	0	w.orthology	nontarget
Aqr	ENSMUSG00000040383				NA	NA	NA	NA	NA	wo.orthology	DAZL.target
Ar	ENSMUSG00000046532				NA	NA	NA	NA	NA	wo.orthology	nontarget
Araf	ENSMUSG00000001127				NA	NA	NA	NA	NA	wo.orthology	DAZL.target
Arap1	ENSMUSG00000032812				NA	NA	NA	NA	NA	wo.orthology	nontarget
Arap2	ENSMUSG00000037999				NA	NA	NA	NA	NA	wo.orthology	nontarget
Arap3	ENSMUSG00000024451				NA	NA	NA	NA	NA	wo.orthology	nontarget
Arc	ENSMUSG00000022602				NA	NA	NA	NA	NA	wo.orthology	nontarget
Arcn1	ENSMUSG00000032096	YFR051C		ortholog_one2one	32.2896	30.2198	NA	NA	1	w.orthology	DAZL.target
Arel1	ENSMUSG00000042350				NA	NA	NA	NA	NA	wo.orthology	nontarget
Arf1	ENSMUSG00000048076				NA	NA	NA	NA	NA	wo.orthology	DAZL.target
Arf2	ENSMUSG00000062421				NA	NA	NA	NA	NA	wo.orthology	nontarget
Arf3	ENSMUSG00000051853				NA	NA	NA	NA	NA	wo.orthology	DAZL.target
Arf4	ENSMUSG00000021877				NA	NA	NA	NA	NA	wo.orthology	DAZL.target
Arf4	ENSMUSG00000115861				NA	NA	NA	NA	NA	wo.orthology	DAZL.target
Arf5	ENSMUSG00000020440				NA	NA	NA	NA	NA	wo.orthology	nontarget
Arf6	ENSMUSG00000044147				NA	NA	NA	NA	NA	wo.orthology	DAZL.target
Arfgap1	ENSMUSG00000027575				NA	NA	NA	NA	NA	wo.orthology	nontarget
Arfgap2	ENSMUSG00000027255				NA	NA	NA	NA	NA	wo.orthology	nontarget
Arfgap3	ENSMUSG00000054277				NA	NA	NA	NA	NA	wo.orthology	DAZL.target
Arfgef1	ENSMUSG00000067851	YEL022W		ortholog_many2many	11.5926	14.6676	NA	NA	0	w.orthology	DAZL.target
Arfgef1	ENSMUSG00000067851	YNL297C	MON2	ortholog_many2many	9.10076	10.2689	NA	NA	0	w.orthology	DAZL.target
Arfgef1	ENSMUSG00000067851	YJR031C		ortholog_many2many	11.4843	15.0568	NA	NA	0	w.orthology	DAZL.target
Arfgef2	ENSMUSG00000074582	YEL022W		ortholog_many2many	11.6629	14.3249	NA	NA	0	w.orthology	nontarget
Arfgef2	ENSMUSG00000074582	YNL297C	MON2	ortholog_many2many	8.48214	9.29095	NA	NA	0	w.orthology	nontarget
Arfgef2	ENSMUSG00000074582	YJR031C		ortholog_many2many	11.8304	15.0568	NA	NA	0	w.orthology	nontarget
Arfgef3	ENSMUSG00000019852				NA	NA	NA	NA	NA	wo.orthology	nontarget
Arfip1	ENSMUSG00000074513				NA	NA	NA	NA	NA	wo.orthology	DAZL.target
Arfip2	ENSMUSG00000030881				NA	NA	NA	NA	NA	wo.orthology	nontarget
Arfrp1	ENSMUSG00000038671	YPL051W		ortholog_one2one	45.7711	46.4646	NA	NA	1	w.orthology	nontarget
Arg1	ENSMUSG00000019987	YPL111W	CAR1	ortholog_one2many	41.1765	39.9399	NA	NA	1	w.orthology	nontarget
Arg2	ENSMUSG00000021125	YPL111W	CAR1	ortholog_one2many	36.4407	38.7387	NA	NA	1	w.orthology	nontarget
Arglu1	ENSMUSG00000040459				NA	NA	NA	NA	NA	wo.orthology	DAZL.target
Arhgap1	ENSMUSG00000027247				NA	NA	NA	NA	NA	wo.orthology	DAZL.target
Arhgap10	ENSMUSG00000037148				NA	NA	NA	NA	NA	wo.orthology	nontarget
Arhgap11a	ENSMUSG00000041219				NA	NA	NA	NA	NA	wo.orthology	nontarget
Arhgap12	ENSMUSG00000041225				NA	NA	NA	NA	NA	wo.orthology	nontarget
Arhgap17	ENSMUSG00000030766				NA	NA	NA	NA	NA	wo.orthology	DAZL.target
Arhgap18	ENSMUSG00000039031				NA	NA	NA	NA	NA	wo.orthology	nontarget
Arhgap19	ENSMUSG00000025154				NA	NA	NA	NA	NA	wo.orthology	nontarget
Arhgap20	ENSMUSG00000053199				NA	NA	NA	NA	NA	wo.orthology	nontarget
Arhgap21	ENSMUSG00000036591				NA	NA	NA	NA	NA	wo.orthology	nontarget
Arhgap22	ENSMUSG00000063506				NA	NA	NA	NA	NA	wo.orthology	nontarget
Arhgap23	ENSMUSG00000049807				NA	NA	NA	NA	NA	wo.orthology	nontarget
Arhgap25	ENSMUSG00000030047				NA	NA	NA	NA	NA	wo.orthology	nontarget
Arhgap26	ENSMUSG00000036452				NA	NA	NA	NA	NA	wo.orthology	nontarget
Arhgap26	ENSMUSG00000118193				NA	NA	NA	NA	NA	wo.orthology	nontarget
Arhgap28	ENSMUSG00000024043				NA	NA	NA	NA	NA	wo.orthology	nontarget
Arhgap29	ENSMUSG00000039831	YOR134W		ortholog_many2many	6.16114	19.0709	NA	NA	0	w.orthology	DAZL.target
Arhgap29	ENSMUSG00000039831	YDR389W		ortholog_many2many	8.68878	16.8196	NA	NA	0	w.orthology	DAZL.target
Arhgap30	ENSMUSG00000048865				NA	NA	NA	NA	NA	wo.orthology	nontarget
Arhgap31	ENSMUSG00000022799				NA	NA	NA	NA	NA	wo.orthology	nontarget
Arhgap32	ENSMUSG00000041444				NA	NA	NA	NA	NA	wo.orthology	DAZL.target
Arhgap33	ENSMUSG00000036882				NA	NA	NA	NA	NA	wo.orthology	nontarget
Arhgap35	ENSMUSG00000058230	YER155C	BEM2	ortholog_one2one	22.8152	15.7822	NA	NA	0	w.orthology	nontarget
Arhgap39	ENSMUSG00000033697				NA	NA	NA	NA	NA	wo.orthology	nontarget
Arhgap4	ENSMUSG00000031389				NA	NA	NA	NA	NA	wo.orthology	nontarget
Arhgap42	ENSMUSG00000050730				NA	NA	NA	NA	NA	wo.orthology	nontarget
Arhgap44	ENSMUSG00000033389				NA	NA	NA	NA	NA	wo.orthology	DAZL.target
Arhgap45	ENSMUSG00000035697	YDR389W		ortholog_many2many	8.60692	14.8318	NA	NA	0	w.orthology	nontarget
Arhgap45	ENSMUSG00000035697	YOR134W		ortholog_many2many	6.38864	17.6039	NA	NA	0	w.orthology	nontarget
Arhgap5	ENSMUSG00000035133				NA	NA	NA	NA	NA	wo.orthology	DAZL.target
Arhgap8	ENSMUSG00000078954				NA	NA	NA	NA	NA	wo.orthology	nontarget
Arhgap9	ENSMUSG00000040345				NA	NA	NA	NA	NA	wo.orthology	nontarget
Arhgdia	ENSMUSG00000025132	YDL135C		ortholog_one2many	37.7451	38.1188	NA	NA	1	w.orthology	nontarget
Arhgdig	ENSMUSG00000073433	YDL135C		ortholog_one2many	29.3333	32.6733	NA	NA	1	w.orthology	nontarget
Arhgef1	ENSMUSG00000040940				NA	NA	NA	NA	NA	wo.orthology	DAZL.target
Arhgef10	ENSMUSG00000071176				NA	NA	NA	NA	NA	wo.orthology	nontarget
Arhgef10l	ENSMUSG00000040964				NA	NA	NA	NA	NA	wo.orthology	nontarget
Arhgef11	ENSMUSG00000041977				NA	NA	NA	NA	NA	wo.orthology	DAZL.target
Arhgef12	ENSMUSG00000059495				NA	NA	NA	NA	NA	wo.orthology	nontarget
Arhgef15	ENSMUSG00000052921				NA	NA	NA	NA	NA	wo.orthology	nontarget
Arhgef16	ENSMUSG00000029032				NA	NA	NA	NA	NA	wo.orthology	nontarget
Arhgef17	ENSMUSG00000032875				NA	NA	NA	NA	NA	wo.orthology	nontarget
Arhgef18	ENSMUSG00000004568				NA	NA	NA	NA	NA	wo.orthology	DAZL.target
Arhgef2	ENSMUSG00000028059				NA	NA	NA	NA	NA	wo.orthology	DAZL.target
Arhgef25	ENSMUSG00000019467				NA	NA	NA	NA	NA	wo.orthology	nontarget
Arhgef26	ENSMUSG00000036885				NA	NA	NA	NA	NA	wo.orthology	nontarget
Arhgef28	ENSMUSG00000021662				NA	NA	NA	NA	NA	wo.orthology	nontarget
Arhgef3	ENSMUSG00000021895				NA	NA	NA	NA	NA	wo.orthology	DAZL.target
Arhgef33	ENSMUSG00000054901				NA	NA	NA	NA	NA	wo.orthology	nontarget
Arhgef37	ENSMUSG00000045094				NA	NA	NA	NA	NA	wo.orthology	nontarget
Arhgef39	ENSMUSG00000051517	YLR371W		ortholog_many2many	16.5698	4.20354	NA	NA	0	w.orthology	nontarget
Arhgef39	ENSMUSG00000051517	YGR070W	ROM1	ortholog_many2many	15.407	4.58874	NA	NA	0	w.orthology	nontarget
Arhgef4	ENSMUSG00000037509				NA	NA	NA	NA	NA	wo.orthology	nontarget
Arhgef4	ENSMUSG00000118272				NA	NA	NA	NA	NA	wo.orthology	nontarget
Arhgef40	ENSMUSG00000004562				NA	NA	NA	NA	NA	wo.orthology	nontarget
Arhgef5	ENSMUSG00000033542				NA	NA	NA	NA	NA	wo.orthology	nontarget
Arhgef7	ENSMUSG00000031511				NA	NA	NA	NA	NA	wo.orthology	DAZL.target
Arhgef9	ENSMUSG00000025656				NA	NA	NA	NA	NA	wo.orthology	nontarget
Arid1a	ENSMUSG00000007880				NA	NA	NA	NA	NA	wo.orthology	DAZL.target
Arid1b	ENSMUSG00000069729				NA	NA	NA	NA	NA	wo.orthology	nontarget
Arid2	ENSMUSG00000033237				NA	NA	NA	NA	NA	wo.orthology	nontarget
Arid3a	ENSMUSG00000019564				NA	NA	NA	NA	NA	wo.orthology	nontarget
Arid3b	ENSMUSG00000004661				NA	NA	NA	NA	NA	wo.orthology	nontarget
Arid3c	ENSMUSG00000066224				NA	NA	NA	NA	NA	wo.orthology	nontarget
Arid4a	ENSMUSG00000048118				NA	NA	NA	NA	NA	wo.orthology	nontarget
Arid4b	ENSMUSG00000039219				NA	NA	NA	NA	NA	wo.orthology	DAZL.target
Arid5a	ENSMUSG00000037447				NA	NA	NA	NA	NA	wo.orthology	nontarget
Arid5b	ENSMUSG00000019947				NA	NA	NA	NA	NA	wo.orthology	nontarget
Arih1	ENSMUSG00000025234	YKR017C		ortholog_one2one	26.4865	26.6788	NA	NA	1	w.orthology	DAZL.target
Arih2	ENSMUSG00000064145				NA	NA	NA	NA	NA	wo.orthology	DAZL.target
Arl1	ENSMUSG00000060904	YBR164C	ARL1	ortholog_one2one	63.5359	62.8415	NA	NA	1	w.orthology	nontarget
Arl10	ENSMUSG00000025870				NA	NA	NA	NA	NA	wo.orthology	nontarget
Arl13b	ENSMUSG00000022911				NA	NA	NA	NA	NA	wo.orthology	nontarget
Arl14ep	ENSMUSG00000027122				NA	NA	NA	NA	NA	wo.orthology	nontarget
Arl14epl	ENSMUSG00000073568				NA	NA	NA	NA	NA	wo.orthology	DAZL.target
Arl15	ENSMUSG00000042348				NA	NA	NA	NA	NA	wo.orthology	nontarget
Arl16	ENSMUSG00000057594				NA	NA	NA	NA	NA	wo.orthology	nontarget
Arl2	ENSMUSG00000024944	YMR138W	CIN4	ortholog_one2one	36.413	35.0785	NA	NA	1	w.orthology	nontarget
Arl2bp	ENSMUSG00000031776				NA	NA	NA	NA	NA	wo.orthology	DAZL.target
Arl3	ENSMUSG00000025035				NA	NA	NA	NA	NA	wo.orthology	nontarget
Arl4a	ENSMUSG00000047446				NA	NA	NA	NA	NA	wo.orthology	nontarget
Arl4c	ENSMUSG00000049866				NA	NA	NA	NA	NA	wo.orthology	nontarget
Arl4d	ENSMUSG00000034936				NA	NA	NA	NA	NA	wo.orthology	nontarget
Arl5a	ENSMUSG00000036093				NA	NA	NA	NA	NA	wo.orthology	DAZL.target
Arl5b	ENSMUSG00000017418				NA	NA	NA	NA	NA	wo.orthology	DAZL.target
Arl6	ENSMUSG00000022722				NA	NA	NA	NA	NA	wo.orthology	nontarget
Arl6ip1	ENSMUSG00000030654				NA	NA	NA	NA	NA	wo.orthology	DAZL.target
Arl6ip4	ENSMUSG00000029404				NA	NA	NA	NA	NA	wo.orthology	nontarget
Arl6ip5	ENSMUSG00000035199				NA	NA	NA	NA	NA	wo.orthology	nontarget
Arl6ip6	ENSMUSG00000026960				NA	NA	NA	NA	NA	wo.orthology	DAZL.target
Arl8a	ENSMUSG00000026426				NA	NA	NA	NA	NA	wo.orthology	DAZL.target
Arl8b	ENSMUSG00000030105				NA	NA	NA	NA	NA	wo.orthology	nontarget
Armc1	ENSMUSG00000027599				NA	NA	NA	NA	NA	wo.orthology	nontarget
Armc10	ENSMUSG00000038525				NA	NA	NA	NA	NA	wo.orthology	nontarget
Armc2	ENSMUSG00000071324				NA	NA	NA	NA	NA	wo.orthology	nontarget
Armc5	ENSMUSG00000042178				NA	NA	NA	NA	NA	wo.orthology	nontarget
Armc6	ENSMUSG00000002343				NA	NA	NA	NA	NA	wo.orthology	nontarget
Armc7	ENSMUSG00000057219				NA	NA	NA	NA	NA	wo.orthology	nontarget
Armc8	ENSMUSG00000032468	YIL017C	VID28	ortholog_one2one	20.5052	14.9837	NA	NA	0	w.orthology	DAZL.target
Armc9	ENSMUSG00000062590				NA	NA	NA	NA	NA	wo.orthology	nontarget
Armcx1	ENSMUSG00000033460				NA	NA	NA	NA	NA	wo.orthology	nontarget
Armcx2	ENSMUSG00000033436				NA	NA	NA	NA	NA	wo.orthology	DAZL.target
Armcx3	ENSMUSG00000049047				NA	NA	NA	NA	NA	wo.orthology	nontarget
Armcx4	ENSMUSG00000049804				NA	NA	NA	NA	NA	wo.orthology	nontarget
Armcx5	ENSMUSG00000072969				NA	NA	NA	NA	NA	wo.orthology	nontarget
Armcx6	ENSMUSG00000050394				NA	NA	NA	NA	NA	wo.orthology	nontarget
Armh3	ENSMUSG00000039901				NA	NA	NA	NA	NA	wo.orthology	nontarget
Armh4	ENSMUSG00000036242				NA	NA	NA	NA	NA	wo.orthology	nontarget
Armt1	ENSMUSG00000061759	YMR027W		ortholog_one2one	30.7517	28.7234	NA	NA	1	w.orthology	nontarget
Arnt	ENSMUSG00000015522				NA	NA	NA	NA	NA	wo.orthology	nontarget
Arnt2	ENSMUSG00000015709				NA	NA	NA	NA	NA	wo.orthology	nontarget
Arntl	ENSMUSG00000055116				NA	NA	NA	NA	NA	wo.orthology	DAZL.target
Arntl2	ENSMUSG00000040187				NA	NA	NA	NA	NA	wo.orthology	nontarget
Arpc1a	ENSMUSG00000029621	YBR234C		ortholog_one2many	39.4595	38.0208	NA	NA	1	w.orthology	DAZL.target
Arpc1b	ENSMUSG00000029622	YBR234C		ortholog_one2many	38.4409	37.2396	NA	NA	1	w.orthology	nontarget
Arpc2	ENSMUSG00000006304	YNR035C	ARC35	ortholog_one2one	28.3333	24.8538	NA	NA	0	w.orthology	DAZL.target
Arpc3	ENSMUSG00000029465	YLR370C		ortholog_one2one	47.191	47.191	NA	NA	1	w.orthology	DAZL.target
Arpc4	ENSMUSG00000079426	YKL013C		ortholog_one2one	69.0476	67.8363	NA	NA	1	w.orthology	nontarget
Arpc5	ENSMUSG00000008475	YIL062C		ortholog_one2many	30.4636	29.8701	NA	NA	0	w.orthology	DAZL.target
Arpc5l	ENSMUSG00000026755	YIL062C		ortholog_one2many	30.719	30.5195	NA	NA	0	w.orthology	DAZL.target
Arpp19	ENSMUSG00000007656	YHR132W-A		ortholog_many2many	20.6897	22.9008	NA	NA	0	w.orthology	nontarget
Arpp19	ENSMUSG00000007656	YNL157W		ortholog_many2many	22.069	19.0476	NA	NA	0	w.orthology	nontarget
Arrb1	ENSMUSG00000018909				NA	NA	NA	NA	NA	wo.orthology	nontarget
Arrb2	ENSMUSG00000060216				NA	NA	NA	NA	NA	wo.orthology	nontarget
Arrdc1	ENSMUSG00000026972	YOR018W	ROD1	ortholog_many2many	16.5899	8.60215	NA	NA	0	w.orthology	nontarget
Arrdc1	ENSMUSG00000026972	YKR021W	ALY1	ortholog_many2many	18.894	8.96175	NA	NA	0	w.orthology	nontarget
Arrdc1	ENSMUSG00000026972	YPR030W	CSR2	ortholog_many2many	14.2857	5.53078	NA	NA	0	w.orthology	nontarget
Arrdc1	ENSMUSG00000026972	YBL101C	ECM21	ortholog_many2many	16.5899	6.44584	NA	NA	0	w.orthology	nontarget
Arrdc1	ENSMUSG00000026972	YFR022W	ROG3	ortholog_many2many	17.2811	10.2319	NA	NA	0	w.orthology	nontarget
Arrdc1	ENSMUSG00000026972	YJL084C	ALY2	ortholog_many2many	20.2765	8.413	NA	NA	0	w.orthology	nontarget
Arrdc2	ENSMUSG00000002910	YBL101C	ECM21	ortholog_many2many	18.9189	6.89346	NA	NA	0	w.orthology	nontarget
Arrdc2	ENSMUSG00000002910	YOR018W	ROD1	ortholog_many2many	20.3931	9.91637	NA	NA	0	w.orthology	nontarget
Arrdc2	ENSMUSG00000002910	YJL084C	ALY2	ortholog_many2many	18.4275	7.17017	NA	NA	0	w.orthology	nontarget
Arrdc2	ENSMUSG00000110906				NA	NA	NA	NA	NA	w.orthology	nontarget
Arrdc2	ENSMUSG00000002910	YKR021W	ALY1	ortholog_many2many	19.4103	8.63388	NA	NA	0	w.orthology	nontarget
Arrdc2	ENSMUSG00000002910	YPR030W	CSR2	ortholog_many2many	16.9533	6.15522	NA	NA	0	w.orthology	nontarget
Arrdc2	ENSMUSG00000002910	YFR022W	ROG3	ortholog_many2many	17.9361	9.95907	NA	NA	0	w.orthology	nontarget
Arrdc3	ENSMUSG00000074794	YPR030W	CSR2	ortholog_many2many	16.9082	6.24442	NA	NA	0	w.orthology	DAZL.target
Arrdc3	ENSMUSG00000074794	YJL084C	ALY2	ortholog_many2many	19.8068	7.83939	NA	NA	0	w.orthology	DAZL.target
Arrdc3	ENSMUSG00000074794	YBL101C	ECM21	ortholog_many2many	21.256	7.87825	NA	NA	0	w.orthology	DAZL.target
Arrdc3	ENSMUSG00000074794	YOR018W	ROD1	ortholog_many2many	21.9807	10.8722	NA	NA	0	w.orthology	DAZL.target
Arrdc3	ENSMUSG00000074794	YFR022W	ROG3	ortholog_many2many	18.3575	10.3683	NA	NA	0	w.orthology	DAZL.target
Arrdc3	ENSMUSG00000074794	YKR021W	ALY1	ortholog_many2many	21.256	9.61749	NA	NA	0	w.orthology	DAZL.target
Arrdc4	ENSMUSG00000042659	YFR022W	ROG3	ortholog_many2many	19.5181	11.0505	NA	NA	0	w.orthology	DAZL.target
Arrdc4	ENSMUSG00000042659	YJL084C	ALY2	ortholog_many2many	19.5181	7.74379	NA	NA	0	w.orthology	DAZL.target
Arrdc4	ENSMUSG00000042659	YBL101C	ECM21	ortholog_many2many	21.6867	8.0573	NA	NA	0	w.orthology	DAZL.target
Arrdc4	ENSMUSG00000042659	YKR021W	ALY1	ortholog_many2many	19.5181	8.85246	NA	NA	0	w.orthology	DAZL.target
Arrdc4	ENSMUSG00000042659	YPR030W	CSR2	ortholog_many2many	17.1084	6.33363	NA	NA	0	w.orthology	DAZL.target
Arrdc4	ENSMUSG00000042659	YOR018W	ROD1	ortholog_many2many	20.9639	10.3943	NA	NA	0	w.orthology	DAZL.target
Arsa	ENSMUSG00000022620				NA	NA	NA	NA	NA	wo.orthology	nontarget
Arsb	ENSMUSG00000042082				NA	NA	NA	NA	NA	wo.orthology	nontarget
Arsg	ENSMUSG00000020604				NA	NA	NA	NA	NA	wo.orthology	nontarget
Arsk	ENSMUSG00000021592				NA	NA	NA	NA	NA	wo.orthology	nontarget
Art1	ENSMUSG00000030996				NA	NA	NA	NA	NA	wo.orthology	nontarget
Art2b	ENSMUSG00000030651				NA	NA	NA	NA	NA	wo.orthology	nontarget
Art3	ENSMUSG00000034842				NA	NA	NA	NA	NA	wo.orthology	nontarget
Art5	ENSMUSG00000070424				NA	NA	NA	NA	NA	wo.orthology	nontarget
Arv1	ENSMUSG00000031982	YLR242C		ortholog_one2one	15.7895	13.0841	NA	NA	0	w.orthology	nontarget
Arvcf	ENSMUSG00000000325				NA	NA	NA	NA	NA	wo.orthology	nontarget
Arvcf	ENSMUSG00000098615				NA	NA	NA	NA	NA	wo.orthology	nontarget
Arxes1	ENSMUSG00000048355	YLR066W		ortholog_one2many	19.4444	19.0217	NA	NA	0	w.orthology	nontarget
Arxes2	ENSMUSG00000048040	YLR066W		ortholog_one2many	19.4444	19.0217	NA	NA	0	w.orthology	nontarget
As3mt	ENSMUSG00000003559	YHR209W		ortholog_many2many	11.4362	14.7766	NA	NA	0	w.orthology	nontarget
As3mt	ENSMUSG00000003559	YER175C	TMT1	ortholog_many2many	9.57447	12.0401	NA	NA	0	w.orthology	nontarget
Asah1	ENSMUSG00000031591				NA	NA	NA	NA	NA	wo.orthology	DAZL.target
Asah2	ENSMUSG00000024887				NA	NA	NA	NA	NA	wo.orthology	nontarget
Asap1	ENSMUSG00000022377				NA	NA	NA	NA	NA	wo.orthology	nontarget
Asap2	ENSMUSG00000052632				NA	NA	NA	NA	NA	wo.orthology	nontarget
Asap3	ENSMUSG00000036995				NA	NA	NA	NA	NA	wo.orthology	nontarget
Asb1	ENSMUSG00000026311				NA	NA	NA	NA	NA	wo.orthology	nontarget
Asb13	ENSMUSG00000033781				NA	NA	NA	NA	NA	wo.orthology	nontarget
Asb16	ENSMUSG00000034768				NA	NA	NA	NA	NA	wo.orthology	nontarget
Asb3	ENSMUSG00000020305				NA	NA	NA	NA	NA	wo.orthology	DAZL.target
Asb5	ENSMUSG00000031519				NA	NA	NA	NA	NA	wo.orthology	nontarget
Asb6	ENSMUSG00000039483				NA	NA	NA	NA	NA	wo.orthology	nontarget
Asb7	ENSMUSG00000030509				NA	NA	NA	NA	NA	wo.orthology	nontarget
Asb8	ENSMUSG00000048175				NA	NA	NA	NA	NA	wo.orthology	DAZL.target
Asb9	ENSMUSG00000031384				NA	NA	NA	NA	NA	wo.orthology	nontarget
Ascc1	ENSMUSG00000044475				NA	NA	NA	NA	NA	wo.orthology	nontarget
Ascc2	ENSMUSG00000020412				NA	NA	NA	NA	NA	wo.orthology	nontarget
Ascc3	ENSMUSG00000038774	YGR271W		ortholog_one2one	38.3076	42.8063	NA	NA	1	w.orthology	DAZL.target
Ascl2	ENSMUSG00000009248				NA	NA	NA	NA	NA	wo.orthology	nontarget
Ascl4	ENSMUSG00000085111				NA	NA	NA	NA	NA	wo.orthology	nontarget
Asdurf	ENSMUSG00000117809				NA	NA	NA	NA	NA	wo.orthology	nontarget
Asf1a	ENSMUSG00000019857	YJL115W	ASF1	ortholog_one2many	48.5294	35.4839	NA	NA	1	w.orthology	DAZL.target
Asf1b	ENSMUSG00000005470	YJL115W	ASF1	ortholog_one2many	48.5149	35.1254	NA	NA	1	w.orthology	nontarget
Asgr2	ENSMUSG00000040963				NA	NA	NA	NA	NA	wo.orthology	nontarget
Ash1l	ENSMUSG00000028053				NA	NA	NA	NA	NA	wo.orthology	nontarget
Ash2l	ENSMUSG00000031575	YLR015W	BRE2	ortholog_one2one	14.1252	17.4257	NA	NA	0	w.orthology	nontarget
Asic1	ENSMUSG00000023017				NA	NA	NA	NA	NA	wo.orthology	nontarget
Asl	ENSMUSG00000025533	YHR018C		ortholog_one2one	54.0948	54.2117	NA	NA	0	w.orthology	nontarget
Asna1	ENSMUSG00000052456	YDL100C	GET3	ortholog_one2one	44.2529	43.5028	NA	NA	1	w.orthology	nontarget
Asns	ENSMUSG00000029752				NA	NA	NA	NA	NA	wo.orthology	nontarget
Asnsd1	ENSMUSG00000026095	YML096W		ortholog_one2many	22.9665	27.4286	NA	NA	0	w.orthology	nontarget
Aspa	ENSMUSG00000020774				NA	NA	NA	NA	NA	wo.orthology	nontarget
Aspdh	ENSMUSG00000038704				NA	NA	NA	NA	NA	wo.orthology	nontarget
Aspg	ENSMUSG00000037686	YLR160C	ASP3-4	ortholog_one2many	6.91489	10.7735	NA	NA	0	w.orthology	nontarget
Aspg	ENSMUSG00000037686	YLR157C	ASP3-2	ortholog_one2many	6.91489	10.7735	NA	NA	0	w.orthology	nontarget
Aspg	ENSMUSG00000037686	YLR155C	ASP3-1	ortholog_one2many	6.91489	10.7735	NA	NA	0	w.orthology	nontarget
Aspg	ENSMUSG00000037686	YMR016C		ortholog_one2many	6.91489	4.96815	NA	NA	0	w.orthology	nontarget
Aspg	ENSMUSG00000037686	YLR158C	ASP3-3	ortholog_one2many	6.91489	10.7735	NA	NA	0	w.orthology	nontarget
Aspg	ENSMUSG00000037686	YKL043W		ortholog_one2many	5.85106	9.01639	NA	NA	0	w.orthology	nontarget
Asph	ENSMUSG00000028207				NA	NA	NA	NA	NA	wo.orthology	nontarget
Asphd1	ENSMUSG00000046378				NA	NA	NA	NA	NA	wo.orthology	nontarget
Asphd2	ENSMUSG00000029348				NA	NA	NA	NA	NA	wo.orthology	nontarget
Aspm	ENSMUSG00000033952				NA	NA	NA	NA	NA	wo.orthology	nontarget
Aspn	ENSMUSG00000021388				NA	NA	NA	NA	NA	wo.orthology	nontarget
Aspscr1	ENSMUSG00000025142				NA	NA	NA	NA	NA	wo.orthology	nontarget
Asrgl1	ENSMUSG00000024654				NA	NA	NA	NA	NA	wo.orthology	nontarget
Ass1	ENSMUSG00000076441	YOL058W	ARG1	ortholog_one2one	50.2427	49.2857	NA	NA	1	w.orthology	nontarget
Aste1	ENSMUSG00000032567				NA	NA	NA	NA	NA	wo.orthology	nontarget
Astn2	ENSMUSG00000028373				NA	NA	NA	NA	NA	wo.orthology	nontarget
Asxl1	ENSMUSG00000042548				NA	NA	NA	NA	NA	wo.orthology	nontarget
Asxl2	ENSMUSG00000037486				NA	NA	NA	NA	NA	wo.orthology	nontarget
Asxl3	ENSMUSG00000045215				NA	NA	NA	NA	NA	wo.orthology	nontarget
Asz1	ENSMUSG00000010796				NA	NA	NA	NA	NA	wo.orthology	DAZL.target
Atad1	ENSMUSG00000013662	YPL074W		ortholog_many2many	29.0859	13.9257	NA	NA	0	w.orthology	DAZL.target
Atad1	ENSMUSG00000013662	YER047C		ortholog_many2many	29.6399	11.9287	NA	NA	0	w.orthology	DAZL.target
Atad2	ENSMUSG00000022360	YDL126C		ortholog_one2one	15.3959	25.1497	NA	NA	0	w.orthology	DAZL.target
Atad2	ENSMUSG00000116053				NA	NA	NA	NA	NA	w.orthology	DAZL.target
Atad2b	ENSMUSG00000052812	YGR270W		ortholog_one2one	26.8493	28.4264	NA	NA	1	w.orthology	DAZL.target
Atad3a	ENSMUSG00000029036				NA	NA	NA	NA	NA	wo.orthology	nontarget
Atad5	ENSMUSG00000017550				NA	NA	NA	NA	NA	wo.orthology	nontarget
Atat1	ENSMUSG00000024426				NA	NA	NA	NA	NA	wo.orthology	nontarget
Atcay	ENSMUSG00000034958				NA	NA	NA	NA	NA	wo.orthology	nontarget
Ate1	ENSMUSG00000030850	YGL017W	ATE1	ortholog_one2one	20.155	20.6759	NA	NA	0	w.orthology	nontarget
Atf1	ENSMUSG00000023027				NA	NA	NA	NA	NA	wo.orthology	DAZL.target
Atf2	ENSMUSG00000027104	YNL167C	SKO1	ortholog_many2many	17.6591	13.2921	NA	NA	0	w.orthology	DAZL.target
Atf2	ENSMUSG00000027104	YIL036W	CST6	ortholog_many2many	18.6858	15.5026	NA	NA	0	w.orthology	DAZL.target
Atf2	ENSMUSG00000027104	YER045C		ortholog_many2many	14.1684	14.1104	NA	NA	0	w.orthology	DAZL.target
Atf4	ENSMUSG00000042406				NA	NA	NA	NA	NA	wo.orthology	nontarget
Atf6	ENSMUSG00000026663				NA	NA	NA	NA	NA	wo.orthology	nontarget
Atf6b	ENSMUSG00000015461				NA	NA	NA	NA	NA	wo.orthology	nontarget
Atf7	ENSMUSG00000099083	YIL036W	CST6	ortholog_many2many	18.4265	15.1618	NA	NA	0	w.orthology	nontarget
Atf7	ENSMUSG00000099083	YER045C		ortholog_many2many	14.9068	14.7239	NA	NA	0	w.orthology	nontarget
Atf7	ENSMUSG00000099083	YNL167C	SKO1	ortholog_many2many	16.7702	12.5193	NA	NA	0	w.orthology	nontarget
Atf7ip	ENSMUSG00000030213				NA	NA	NA	NA	NA	wo.orthology	nontarget
Atf7ip2	ENSMUSG00000039200				NA	NA	NA	NA	NA	wo.orthology	DAZL.target
Atg10	ENSMUSG00000021619				NA	NA	NA	NA	NA	wo.orthology	nontarget
Atg101	ENSMUSG00000037204				NA	NA	NA	NA	NA	wo.orthology	DAZL.target
Atg12	ENSMUSG00000032905	YBR217W	ATG12	ortholog_one2one	24.8227	18.8172	NA	NA	0	w.orthology	nontarget
Atg13	ENSMUSG00000027244				NA	NA	NA	NA	NA	wo.orthology	nontarget
Atg14	ENSMUSG00000037526				NA	NA	NA	NA	NA	wo.orthology	DAZL.target
Atg16l1	ENSMUSG00000026289				NA	NA	NA	NA	NA	wo.orthology	nontarget
Atg16l2	ENSMUSG00000047767				NA	NA	NA	NA	NA	wo.orthology	nontarget
Atg2a	ENSMUSG00000106907				NA	NA	NA	NA	NA	w.orthology	nontarget
Atg2a	ENSMUSG00000024773	YNL242W	ATG2	ortholog_one2many	15.883	19.0955	NA	NA	0	w.orthology	nontarget
Atg2b	ENSMUSG00000041341	YNL242W	ATG2	ortholog_one2many	14.7952	19.2839	NA	NA	0	w.orthology	nontarget
Atg3	ENSMUSG00000022663	YNR007C	ATG3	ortholog_one2one	25.1592	25.4839	NA	NA	1	w.orthology	nontarget
Atg4a	ENSMUSG00000116318				NA	NA	NA	NA	NA	w.orthology	nontarget
Atg4a	ENSMUSG00000079418	YNL223W	ATG4	ortholog_one2many	23.2323	18.6235	NA	NA	0	w.orthology	nontarget
Atg4b	ENSMUSG00000026280	YNL223W	ATG4	ortholog_one2many	24.6819	19.6356	NA	NA	0	w.orthology	nontarget
Atg4c	ENSMUSG00000028550	YNL223W	ATG4	ortholog_one2many	24.2358	22.4696	NA	NA	0	w.orthology	nontarget
Atg4d	ENSMUSG00000002820	YNL223W	ATG4	ortholog_one2many	23.2068	22.2672	NA	NA	0	w.orthology	nontarget
Atg5	ENSMUSG00000038160	YPL149W	ATG5	ortholog_one2one	25.8182	24.1497	NA	NA	0	w.orthology	DAZL.target
Atg7	ENSMUSG00000030314	YHR171W	ATG7	ortholog_one2one	34.278	40.3175	NA	NA	1	w.orthology	nontarget
Atg9a	ENSMUSG00000033124	YDL149W	ATG9	ortholog_one2many	22.7652	19.1575	NA	NA	0	w.orthology	nontarget
Atic	ENSMUSG00000026192	YMR120C		ortholog_one2many	60.8108	60.8108	NA	NA	1	w.orthology	DAZL.target
Atic	ENSMUSG00000026192	YLR028C		ortholog_one2many	60.8108	60.9137	NA	NA	1	w.orthology	DAZL.target
Atl1	ENSMUSG00000021066				NA	NA	NA	NA	NA	wo.orthology	DAZL.target
Atl2	ENSMUSG00000059811				NA	NA	NA	NA	NA	wo.orthology	nontarget
Atl3	ENSMUSG00000024759				NA	NA	NA	NA	NA	wo.orthology	nontarget
Atm	ENSMUSG00000034218				NA	NA	NA	NA	NA	wo.orthology	DAZL.target
Atmin	ENSMUSG00000047388				NA	NA	NA	NA	NA	wo.orthology	nontarget
Atn1	ENSMUSG00000004263				NA	NA	NA	NA	NA	wo.orthology	nontarget
Atoh7	ENSMUSG00000036816				NA	NA	NA	NA	NA	wo.orthology	nontarget
Atoh8	ENSMUSG00000037621				NA	NA	NA	NA	NA	wo.orthology	nontarget
Atox1	ENSMUSG00000018585				NA	NA	NA	NA	NA	wo.orthology	nontarget
Atp10a	ENSMUSG00000025324				NA	NA	NA	NA	NA	wo.orthology	nontarget
Atp11a	ENSMUSG00000031441				NA	NA	NA	NA	NA	wo.orthology	nontarget
Atp11b	ENSMUSG00000037400				NA	NA	NA	NA	NA	wo.orthology	DAZL.target
Atp11c	ENSMUSG00000062949				NA	NA	NA	NA	NA	wo.orthology	DAZL.target
Atp11c	ENSMUSG00000108408				NA	NA	NA	NA	NA	wo.orthology	DAZL.target
Atp13a1	ENSMUSG00000031862	YEL031W	SPF1	ortholog_one2one	33.1667	32.7572	NA	NA	1	w.orthology	nontarget
Atp13a2	ENSMUSG00000036622	YGL167C	PMR1	ortholog_many2many	13.858	17.0526	NA	NA	0	w.orthology	nontarget
Atp13a2	ENSMUSG00000036622	YOR291W		ortholog_many2many	34.8161	27.6495	NA	NA	0	w.orthology	nontarget
Atp13a2	ENSMUSG00000036622	YGL008C	PMA1	ortholog_many2many	11.805	15.0327	NA	NA	0	w.orthology	nontarget
Atp13a2	ENSMUSG00000036622	YPL036W		ortholog_many2many	12.0616	14.8891	NA	NA	0	w.orthology	nontarget
Atp13a3	ENSMUSG00000022533	YPL036W		ortholog_many2many	10.3283	13.622	NA	NA	0	w.orthology	nontarget
Atp13a3	ENSMUSG00000022533	YGL167C	PMR1	ortholog_many2many	13.3707	17.5789	NA	NA	0	w.orthology	nontarget
Atp13a3	ENSMUSG00000022533	YGL008C	PMA1	ortholog_many2many	9.92794	13.5076	NA	NA	0	w.orthology	nontarget
Atp1a1	ENSMUSG00000033161	YGL008C	PMA1	ortholog_many2many	17.3998	19.39	NA	NA	0	w.orthology	nontarget
Atp1a1	ENSMUSG00000033161	YPL036W		ortholog_many2many	17.1066	18.4794	NA	NA	0	w.orthology	nontarget
Atp1a2	ENSMUSG00000007097	YOR291W		ortholog_many2many	18.3333	12.7038	NA	NA	0	w.orthology	nontarget
Atp1a2	ENSMUSG00000007097	YGL167C	PMR1	ortholog_many2many	24.0196	25.7895	NA	NA	0	w.orthology	nontarget
Atp1a2	ENSMUSG00000007097	YGL008C	PMA1	ortholog_many2many	17.8431	19.8257	NA	NA	0	w.orthology	nontarget
Atp1a2	ENSMUSG00000007097	YPL036W		ortholog_many2many	17.0588	18.3738	NA	NA	0	w.orthology	nontarget
Atp1a2	ENSMUSG00000007097	YDR039C		ortholog_many2many	26.9608	25.2062	NA	NA	0	w.orthology	nontarget
Atp1a2	ENSMUSG00000007097	YDR038C		ortholog_many2many	26.9608	25.2062	NA	NA	0	w.orthology	nontarget
Atp1a2	ENSMUSG00000007097	YDR040C	ENA1	ortholog_many2many	26.8627	25.1146	NA	NA	0	w.orthology	nontarget
Atp1b1	ENSMUSG00000026576				NA	NA	NA	NA	NA	wo.orthology	nontarget
Atp1b2	ENSMUSG00000041329				NA	NA	NA	NA	NA	wo.orthology	nontarget
Atp1b3	ENSMUSG00000032412				NA	NA	NA	NA	NA	wo.orthology	nontarget
Atp23	ENSMUSG00000025436	YNR020C		ortholog_one2one	28.4553	25.9259	NA	NA	1	w.orthology	nontarget
Atp2a1	ENSMUSG00000030730	YPL036W		ortholog_many2many	24.0443	25.2376	NA	NA	0	w.orthology	nontarget
Atp2a1	ENSMUSG00000030730	YDR038C		ortholog_many2many	27.163	24.7479	NA	NA	0	w.orthology	nontarget
Atp2a1	ENSMUSG00000030730	YDR039C		ortholog_many2many	27.163	24.7479	NA	NA	0	w.orthology	nontarget
Atp2a1	ENSMUSG00000030730	YDR040C	ENA1	ortholog_many2many	26.9618	24.5646	NA	NA	0	w.orthology	nontarget
Atp2a1	ENSMUSG00000030730	YGL167C	PMR1	ortholog_many2many	29.6781	31.0526	NA	NA	0	w.orthology	nontarget
Atp2a1	ENSMUSG00000030730	YGL008C	PMA1	ortholog_many2many	24.2455	26.2527	NA	NA	0	w.orthology	nontarget
Atp2a2	ENSMUSG00000029467	YGL008C	PMA1	ortholog_many2many	23.1801	26.3617	NA	NA	0	w.orthology	DAZL.target
Atp2a2	ENSMUSG00000029467	YPL036W		ortholog_many2many	22.5096	24.8152	NA	NA	0	w.orthology	DAZL.target
Atp2a2	ENSMUSG00000029467	YOR291W		ortholog_many2many	17.9119	12.7038	NA	NA	0	w.orthology	DAZL.target
Atp2a2	ENSMUSG00000029467	YGL167C	PMR1	ortholog_many2many	28.2567	31.0526	NA	NA	0	w.orthology	DAZL.target
Atp2b1	ENSMUSG00000019943	YGL167C	PMR1	ortholog_many2many	20.4918	26.3158	NA	NA	0	w.orthology	DAZL.target
Atp2b1	ENSMUSG00000019943	YOR291W		ortholog_many2many	14.4262	11.9565	NA	NA	0	w.orthology	DAZL.target
Atp2b1	ENSMUSG00000019943	YGL008C	PMA1	ortholog_many2many	13.4426	17.8649	NA	NA	0	w.orthology	DAZL.target
Atp2b1	ENSMUSG00000019943	YPL036W		ortholog_many2many	13.1148	16.8955	NA	NA	0	w.orthology	DAZL.target
Atp2b4	ENSMUSG00000026463	YGL008C	PMA1	ortholog_many2many	13.7759	18.0828	NA	NA	0	w.orthology	DAZL.target
Atp2b4	ENSMUSG00000026463	YPL036W		ortholog_many2many	13.61	17.3178	NA	NA	0	w.orthology	DAZL.target
Atp2c1	ENSMUSG00000032570	YGL008C	PMA1	ortholog_many2many	21.6387	22.4401	NA	NA	0	w.orthology	nontarget
Atp2c1	ENSMUSG00000032570	YPL036W		ortholog_many2many	21.5336	21.6473	NA	NA	0	w.orthology	nontarget
Atp2c1	ENSMUSG00000032570	YGL167C	PMR1	ortholog_many2many	48.2143	48.3158	NA	NA	0	w.orthology	nontarget
Atp4a	ENSMUSG00000005553	YGL167C	PMR1	ortholog_many2many	23.6944	25.7895	NA	NA	0	w.orthology	nontarget
Atp4a	ENSMUSG00000005553	YDR039C		ortholog_many2many	25.4352	24.1063	NA	NA	0	w.orthology	nontarget
Atp4a	ENSMUSG00000005553	YGL008C	PMA1	ortholog_many2many	16.7311	18.8453	NA	NA	0	w.orthology	nontarget
Atp4a	ENSMUSG00000005553	YPL036W		ortholog_many2many	16.1509	17.6346	NA	NA	0	w.orthology	nontarget
Atp4a	ENSMUSG00000005553	YDR040C	ENA1	ortholog_many2many	25.2418	23.923	NA	NA	0	w.orthology	nontarget
Atp4a	ENSMUSG00000005553	YOR291W		ortholog_many2many	17.6983	12.4321	NA	NA	0	w.orthology	nontarget
Atp4a	ENSMUSG00000005553	YDR038C		ortholog_many2many	25.4352	24.1063	NA	NA	0	w.orthology	nontarget
Atp5a1	ENSMUSG00000025428	YBL099W		ortholog_one2one	68.8969	69.9083	NA	NA	1	w.orthology	nontarget
Atp5a1	ENSMUSG00000116276				NA	NA	NA	NA	NA	w.orthology	nontarget
Atp5b	ENSMUSG00000025393	YJR121W		ortholog_one2one	70.5104	72.9941	NA	NA	1	w.orthology	DAZL.target
Atp5c1	ENSMUSG00000025781	YBR039W		ortholog_one2one	35.2349	33.7621	NA	NA	1	w.orthology	nontarget
Atp5d	ENSMUSG00000003072	YDL004W		ortholog_one2one	31.5476	33.125	NA	NA	1	w.orthology	nontarget
Atp5e	ENSMUSG00000016252				NA	NA	NA	NA	NA	wo.orthology	nontarget
Atp5f1	ENSMUSG00000000563	YPL078C	ATP4	ortholog_one2one	19.5312	20.4918	NA	NA	0	w.orthology	nontarget
Atp5g1	ENSMUSG00000006057	Q0130	OLI1	ortholog_one2many	33.8235	60.5263	NA	NA	0	w.orthology	nontarget
Atp5g2	ENSMUSG00000062683	Q0130	OLI1	ortholog_one2many	30.8219	59.2105	NA	NA	0	w.orthology	nontarget
Atp5g3	ENSMUSG00000018770				NA	NA	NA	NA	NA	wo.orthology	DAZL.target
Atp5h	ENSMUSG00000034566	YKL016C		ortholog_one2one	24.2236	22.4138	NA	NA	0	w.orthology	nontarget
Atp5j	ENSMUSG00000022890				NA	NA	NA	NA	NA	wo.orthology	nontarget
Atp5j2	ENSMUSG00000038690				NA	NA	NA	NA	NA	wo.orthology	nontarget
Atp5l	ENSMUSG00000038717	YPR020W		ortholog_one2many	31.068	27.8261	NA	NA	1	w.orthology	nontarget
Atp5mpl	ENSMUSG00000021290				NA	NA	NA	NA	NA	wo.orthology	nontarget
Atp5o	ENSMUSG00000022956	YDR298C	ATP5	ortholog_one2one	30.5164	30.6604	NA	NA	1	w.orthology	nontarget
Atp5o	ENSMUSG00000116933				NA	NA	NA	NA	NA	w.orthology	nontarget
Atp6ap1	ENSMUSG00000019087				NA	NA	NA	NA	NA	wo.orthology	DAZL.target
Atp6ap2	ENSMUSG00000031007				NA	NA	NA	NA	NA	wo.orthology	DAZL.target
Atp6v0a1	ENSMUSG00000019302	YMR054W		ortholog_many2many	38.7366	36.5169	NA	NA	1	w.orthology	nontarget
Atp6v0a1	ENSMUSG00000019302	YOR270C		ortholog_many2many	41.2396	41.1905	NA	NA	1	w.orthology	nontarget
Atp6v0a2	ENSMUSG00000038023	YOR270C		ortholog_many2many	35.2804	35.9524	NA	NA	1	w.orthology	nontarget
Atp6v0a2	ENSMUSG00000038023	YMR054W		ortholog_many2many	35.514	34.1573	NA	NA	1	w.orthology	nontarget
Atp6v0b	ENSMUSG00000033379	YHR026W	VMA16	ortholog_one2one	48.7805	46.9484	NA	NA	1	w.orthology	nontarget
Atp6v0c	ENSMUSG00000024121	YEL027W	VMA3	ortholog_one2one	69.0323	66.875	NA	NA	1	w.orthology	nontarget
Atp6v0d1	ENSMUSG00000013160	YLR447C		ortholog_one2many	46.1538	46.9565	NA	NA	1	w.orthology	nontarget
Atp6v0e	ENSMUSG00000015575				NA	NA	NA	NA	NA	wo.orthology	nontarget
Atp6v0e2	ENSMUSG00000039347				NA	NA	NA	NA	NA	wo.orthology	nontarget
Atp6v1a	ENSMUSG00000052459	YDL185W	VMA1	ortholog_one2one	64.6677	37.2549	NA	NA	1	w.orthology	DAZL.target
Atp6v1b2	ENSMUSG00000006273				NA	NA	NA	NA	NA	wo.orthology	DAZL.target
Atp6v1c1	ENSMUSG00000022295	YKL080W	VMA5	ortholog_one2many	37.4346	36.4796	NA	NA	1	w.orthology	nontarget
Atp6v1c1	ENSMUSG00000116394				NA	NA	NA	NA	NA	w.orthology	nontarget
Atp6v1c2	ENSMUSG00000020566	YKL080W	VMA5	ortholog_one2many	30.8924	34.4388	NA	NA	1	w.orthology	nontarget
Atp6v1d	ENSMUSG00000021114	YEL051W		ortholog_one2one	51.0121	49.2188	NA	NA	1	w.orthology	nontarget
Atp6v1e1	ENSMUSG00000019210	YOR332W		ortholog_one2many	33.6283	32.618	NA	NA	1	w.orthology	nontarget
Atp6v1f	ENSMUSG00000004285	YGR020C		ortholog_one2one	49.5798	50	NA	NA	1	w.orthology	DAZL.target
Atp6v1g1	ENSMUSG00000039105				NA	NA	NA	NA	NA	wo.orthology	DAZL.target
Atp6v1g2	ENSMUSG00000024403				NA	NA	NA	NA	NA	wo.orthology	nontarget
Atp6v1h	ENSMUSG00000033793	YPR036W	VMA13	ortholog_one2one	21.9462	22.1757	NA	NA	0	w.orthology	DAZL.target
Atp7a	ENSMUSG00000033792	YGL167C	PMR1	ortholog_many2many	11.126	17.4737	NA	NA	0	w.orthology	DAZL.target
Atp7a	ENSMUSG00000033792	YPL036W		ortholog_many2many	9.85255	15.5227	NA	NA	0	w.orthology	DAZL.target
Atp7a	ENSMUSG00000033792	YOR291W		ortholog_many2many	9.24933	9.375	NA	NA	0	w.orthology	DAZL.target
Atp7a	ENSMUSG00000033792	YGL008C	PMA1	ortholog_many2many	9.85255	16.0131	NA	NA	0	w.orthology	DAZL.target
Atp7b	ENSMUSG00000006567	YPL036W		ortholog_many2many	9.84952	15.2059	NA	NA	0	w.orthology	nontarget
Atp7b	ENSMUSG00000006567	YGL008C	PMA1	ortholog_many2many	9.64432	15.3595	NA	NA	0	w.orthology	nontarget
Atp8a1	ENSMUSG00000037685				NA	NA	NA	NA	NA	wo.orthology	nontarget
Atp8a2	ENSMUSG00000021983				NA	NA	NA	NA	NA	wo.orthology	nontarget
Atp8b2	ENSMUSG00000060671				NA	NA	NA	NA	NA	wo.orthology	nontarget
Atp8b3	ENSMUSG00000003341				NA	NA	NA	NA	NA	wo.orthology	nontarget
Atp8b4	ENSMUSG00000060131				NA	NA	NA	NA	NA	wo.orthology	nontarget
Atp8b5	ENSMUSG00000028457				NA	NA	NA	NA	NA	wo.orthology	nontarget
Atp9a	ENSMUSG00000027546				NA	NA	NA	NA	NA	wo.orthology	nontarget
Atp9b	ENSMUSG00000024566				NA	NA	NA	NA	NA	wo.orthology	nontarget
Atpaf1	ENSMUSG00000028710	YNL315C		ortholog_one2one	20.6897	22.6415	NA	NA	0	w.orthology	nontarget
Atpaf2	ENSMUSG00000042709	YJL180C		ortholog_one2one	17.7852	16.3077	NA	NA	0	w.orthology	nontarget
Atpif1	ENSMUSG00000054428				NA	NA	NA	NA	NA	wo.orthology	nontarget
Atr	ENSMUSG00000032409				NA	NA	NA	NA	NA	wo.orthology	nontarget
Atraid	ENSMUSG00000013622				NA	NA	NA	NA	NA	wo.orthology	nontarget
Atrip	ENSMUSG00000025646				NA	NA	NA	NA	NA	wo.orthology	nontarget
Atrn	ENSMUSG00000027312				NA	NA	NA	NA	NA	wo.orthology	nontarget
Atrnl1	ENSMUSG00000054843				NA	NA	NA	NA	NA	wo.orthology	nontarget
Atrx	ENSMUSG00000031229				NA	NA	NA	NA	NA	wo.orthology	DAZL.target
Atxn1	ENSMUSG00000046876				NA	NA	NA	NA	NA	wo.orthology	nontarget
Atxn10	ENSMUSG00000016541	YCR054C		ortholog_one2one	21.8947	18.4725	NA	NA	0	w.orthology	nontarget
Atxn1l	ENSMUSG00000069895				NA	NA	NA	NA	NA	wo.orthology	nontarget
Atxn2	ENSMUSG00000042605	YGR178C	PBP1	ortholog_one2many	12.7527	22.7147	NA	NA	0	w.orthology	nontarget
Atxn2l	ENSMUSG00000032637	YGR178C	PBP1	ortholog_one2many	14.8713	21.6066	NA	NA	0	w.orthology	DAZL.target
Atxn3	ENSMUSG00000021189				NA	NA	NA	NA	NA	wo.orthology	nontarget
Atxn7	ENSMUSG00000021738	YGL066W	SGF73	ortholog_one2many	13.7255	18.1126	NA	NA	0	w.orthology	nontarget
Atxn7l1	ENSMUSG00000020564	YGL066W	SGF73	ortholog_one2many	13.5318	15.2207	NA	NA	0	w.orthology	nontarget
Atxn7l2	ENSMUSG00000048997	YGL066W	SGF73	ortholog_one2many	13.0747	13.8508	NA	NA	0	w.orthology	nontarget
Atxn7l3	ENSMUSG00000059995	YGL066W	SGF73	ortholog_one2many	16.6667	8.98021	NA	NA	0	w.orthology	nontarget
Atxn7l3b	ENSMUSG00000074748	YGL066W	SGF73	ortholog_one2many	8.24742	1.21766	NA	NA	0	w.orthology	DAZL.target
AU018091	ENSMUSG00000054753	YLL061W		ortholog_many2many	13.1579	15.4374	NA	NA	0	w.orthology	nontarget
AU018091	ENSMUSG00000054753	YPL274W		ortholog_many2many	11.4035	13.2879	NA	NA	0	w.orthology	nontarget
AU018091	ENSMUSG00000054753	YEL063C		ortholog_many2many	12.2807	14.2373	NA	NA	0	w.orthology	nontarget
AU018091	ENSMUSG00000054753	YNL270C	ALP1	ortholog_many2many	12.2807	14.6597	NA	NA	0	w.orthology	nontarget
AU018091	ENSMUSG00000054753	YDR508C		ortholog_many2many	13.3041	13.7255	NA	NA	0	w.orthology	nontarget
AU018091	ENSMUSG00000054753	YDR046C	BAP3	ortholog_many2many	13.4503	15.2318	NA	NA	0	w.orthology	nontarget
AU018091	ENSMUSG00000054753	YBR068C		ortholog_many2many	14.3275	16.092	NA	NA	0	w.orthology	nontarget
AU018091	ENSMUSG00000054753	YCL025C	AGP1	ortholog_many2many	14.0351	15.1659	NA	NA	0	w.orthology	nontarget
AU018091	ENSMUSG00000107871				NA	NA	NA	NA	NA	w.orthology	nontarget
AU022252	ENSMUSG00000078584				NA	NA	NA	NA	NA	wo.orthology	nontarget
AU022751	ENSMUSG00000073294				NA	NA	NA	NA	NA	wo.orthology	nontarget
AU040320	ENSMUSG00000028830				NA	NA	NA	NA	NA	wo.orthology	nontarget
AU041133	ENSMUSG00000078435				NA	NA	NA	NA	NA	wo.orthology	nontarget
Auh	ENSMUSG00000021460	YOR180C	DCI1	ortholog_many2many	13.0573	15.1292	NA	NA	0	w.orthology	nontarget
Auh	ENSMUSG00000021460	YLR284C		ortholog_many2many	16.5605	18.5714	NA	NA	0	w.orthology	nontarget
Aunip	ENSMUSG00000078521				NA	NA	NA	NA	NA	wo.orthology	nontarget
Aup1	ENSMUSG00000068328				NA	NA	NA	NA	NA	wo.orthology	nontarget
Aurka	ENSMUSG00000027496				NA	NA	NA	NA	NA	wo.orthology	nontarget
Aurkaip1	ENSMUSG00000065990				NA	NA	NA	NA	NA	wo.orthology	nontarget
Aurkb	ENSMUSG00000020897				NA	NA	NA	NA	NA	wo.orthology	nontarget
Aurkc	ENSMUSG00000070837				NA	NA	NA	NA	NA	wo.orthology	nontarget
Auts2	ENSMUSG00000029673				NA	NA	NA	NA	NA	wo.orthology	DAZL.target
AV320801	ENSMUSG00000054994				NA	NA	NA	NA	NA	wo.orthology	nontarget
Aven	ENSMUSG00000003604				NA	NA	NA	NA	NA	wo.orthology	nontarget
Avl9	ENSMUSG00000029787	YLR114C		ortholog_one2one	23.7288	20.1571	NA	NA	0	w.orthology	DAZL.target
Avpi1	ENSMUSG00000018821				NA	NA	NA	NA	NA	wo.orthology	nontarget
AW146154	ENSMUSG00000074166				NA	NA	NA	NA	NA	wo.orthology	nontarget
AW209491	ENSMUSG00000039182				NA	NA	NA	NA	NA	wo.orthology	nontarget
AW549877	ENSMUSG00000041935				NA	NA	NA	NA	NA	wo.orthology	nontarget
AW554918	ENSMUSG00000033632				NA	NA	NA	NA	NA	wo.orthology	nontarget
Awat2	ENSMUSG00000031220	YOR245C		ortholog_one2many	33.033	26.3158	NA	NA	1	w.orthology	nontarget
Axdnd1	ENSMUSG00000026601				NA	NA	NA	NA	NA	wo.orthology	nontarget
Axin1	ENSMUSG00000024182				NA	NA	NA	NA	NA	wo.orthology	nontarget
Axin2	ENSMUSG00000000142				NA	NA	NA	NA	NA	wo.orthology	DAZL.target
Axl	ENSMUSG00000002602				NA	NA	NA	NA	NA	wo.orthology	nontarget
AY074887	ENSMUSG00000044820				NA	NA	NA	NA	NA	wo.orthology	nontarget
AY358078	ENSMUSG00000050961				NA	NA	NA	NA	NA	wo.orthology	nontarget
Azi2	ENSMUSG00000039285				NA	NA	NA	NA	NA	wo.orthology	nontarget
Azin1	ENSMUSG00000037458	YKL184W	SPE1	ortholog_one2many	33.0357	31.7597	NA	NA	1	w.orthology	DAZL.target
Azin2	ENSMUSG00000028789	YKL184W	SPE1	ortholog_one2many	34.4227	33.9056	NA	NA	1	w.orthology	nontarget
B230118H07Rik	ENSMUSG00000027165				NA	NA	NA	NA	NA	wo.orthology	nontarget
B230217C12Rik	ENSMUSG00000050538				NA	NA	NA	NA	NA	wo.orthology	nontarget
B230219D22Rik	ENSMUSG00000045767				NA	NA	NA	NA	NA	wo.orthology	nontarget
B230307C23Rik	ENSMUSG00000080717				NA	NA	NA	NA	NA	wo.orthology	nontarget
B230311B06Rik	ENSMUSG00000109284				NA	NA	NA	NA	NA	wo.orthology	nontarget
B2m	ENSMUSG00000060802				NA	NA	NA	NA	NA	wo.orthology	DAZL.target
B3galnt1	ENSMUSG00000043300				NA	NA	NA	NA	NA	wo.orthology	nontarget
B3galnt2	ENSMUSG00000039242				NA	NA	NA	NA	NA	wo.orthology	nontarget
B3galt1	ENSMUSG00000034780				NA	NA	NA	NA	NA	wo.orthology	nontarget
B3galt2	ENSMUSG00000033849				NA	NA	NA	NA	NA	wo.orthology	nontarget
B3galt4	ENSMUSG00000067370				NA	NA	NA	NA	NA	wo.orthology	nontarget
B3galt6	ENSMUSG00000050796				NA	NA	NA	NA	NA	wo.orthology	nontarget
B3gat1	ENSMUSG00000045994				NA	NA	NA	NA	NA	wo.orthology	nontarget
B3gat2	ENSMUSG00000026156				NA	NA	NA	NA	NA	wo.orthology	DAZL.target
B3gat3	ENSMUSG00000071649				NA	NA	NA	NA	NA	wo.orthology	nontarget
B3glct	ENSMUSG00000051950				NA	NA	NA	NA	NA	wo.orthology	nontarget
B3gnt2	ENSMUSG00000051650				NA	NA	NA	NA	NA	wo.orthology	nontarget
B3gnt4	ENSMUSG00000029431				NA	NA	NA	NA	NA	wo.orthology	nontarget
B3gnt5	ENSMUSG00000022686				NA	NA	NA	NA	NA	wo.orthology	DAZL.target
B3gnt7	ENSMUSG00000079445				NA	NA	NA	NA	NA	wo.orthology	nontarget
B3gnt8	ENSMUSG00000059479				NA	NA	NA	NA	NA	wo.orthology	nontarget
B3gnt9	ENSMUSG00000069920				NA	NA	NA	NA	NA	wo.orthology	nontarget
B3gntl1	ENSMUSG00000046605				NA	NA	NA	NA	NA	wo.orthology	nontarget
B430306N03Rik	ENSMUSG00000043740				NA	NA	NA	NA	NA	wo.orthology	nontarget
B430306N03Rik	ENSMUSG00000116225				NA	NA	NA	NA	NA	wo.orthology	nontarget
B4galnt1	ENSMUSG00000006731				NA	NA	NA	NA	NA	wo.orthology	nontarget
B4galnt2	ENSMUSG00000013418				NA	NA	NA	NA	NA	wo.orthology	nontarget
B4galnt3	ENSMUSG00000041372				NA	NA	NA	NA	NA	wo.orthology	nontarget
B4galnt4	ENSMUSG00000055629				NA	NA	NA	NA	NA	wo.orthology	nontarget
B4galt1	ENSMUSG00000028413				NA	NA	NA	NA	NA	wo.orthology	DAZL.target
B4galt2	ENSMUSG00000028541				NA	NA	NA	NA	NA	wo.orthology	nontarget
B4galt3	ENSMUSG00000052423				NA	NA	NA	NA	NA	wo.orthology	nontarget
B4galt4	ENSMUSG00000022793				NA	NA	NA	NA	NA	wo.orthology	nontarget
B4galt5	ENSMUSG00000017929				NA	NA	NA	NA	NA	wo.orthology	DAZL.target
B4galt6	ENSMUSG00000056124				NA	NA	NA	NA	NA	wo.orthology	nontarget
B4galt7	ENSMUSG00000021504				NA	NA	NA	NA	NA	wo.orthology	nontarget
B4gat1	ENSMUSG00000047379				NA	NA	NA	NA	NA	wo.orthology	nontarget
B9d1	ENSMUSG00000001039				NA	NA	NA	NA	NA	wo.orthology	nontarget
B9d2	ENSMUSG00000063439				NA	NA	NA	NA	NA	wo.orthology	nontarget
Babam1	ENSMUSG00000031820				NA	NA	NA	NA	NA	wo.orthology	nontarget
Babam2	ENSMUSG00000052139				NA	NA	NA	NA	NA	wo.orthology	nontarget
Bace1	ENSMUSG00000032086				NA	NA	NA	NA	NA	wo.orthology	nontarget
Bach1	ENSMUSG00000025612				NA	NA	NA	NA	NA	wo.orthology	nontarget
Bach2	ENSMUSG00000040270				NA	NA	NA	NA	NA	wo.orthology	nontarget
Bad	ENSMUSG00000024959				NA	NA	NA	NA	NA	wo.orthology	nontarget
Bag1	ENSMUSG00000028416				NA	NA	NA	NA	NA	wo.orthology	nontarget
Bag2	ENSMUSG00000042215				NA	NA	NA	NA	NA	wo.orthology	nontarget
Bag3	ENSMUSG00000030847				NA	NA	NA	NA	NA	wo.orthology	nontarget
Bag4	ENSMUSG00000037316				NA	NA	NA	NA	NA	wo.orthology	DAZL.target
Bag5	ENSMUSG00000049792				NA	NA	NA	NA	NA	wo.orthology	nontarget
Bag6	ENSMUSG00000024392				NA	NA	NA	NA	NA	wo.orthology	nontarget
Bahcc1	ENSMUSG00000039741				NA	NA	NA	NA	NA	wo.orthology	nontarget
Bahd1	ENSMUSG00000040007				NA	NA	NA	NA	NA	wo.orthology	DAZL.target
Baiap2	ENSMUSG00000025372				NA	NA	NA	NA	NA	wo.orthology	nontarget
Baiap2l1	ENSMUSG00000038859				NA	NA	NA	NA	NA	wo.orthology	nontarget
Baiap3	ENSMUSG00000047507	YOR296W		ortholog_one2many	13.3043	11.8697	NA	NA	0	w.orthology	nontarget
Bak1	ENSMUSG00000057789				NA	NA	NA	NA	NA	wo.orthology	nontarget
Bambi	ENSMUSG00000024232				NA	NA	NA	NA	NA	wo.orthology	nontarget
Banf1	ENSMUSG00000024844				NA	NA	NA	NA	NA	wo.orthology	DAZL.target
Bank1	ENSMUSG00000037922				NA	NA	NA	NA	NA	wo.orthology	nontarget
Banp	ENSMUSG00000025316				NA	NA	NA	NA	NA	wo.orthology	nontarget
Bap1	ENSMUSG00000021901				NA	NA	NA	NA	NA	wo.orthology	nontarget
Bard1	ENSMUSG00000026196				NA	NA	NA	NA	NA	wo.orthology	nontarget
Barhl1	ENSMUSG00000026805				NA	NA	NA	NA	NA	wo.orthology	nontarget
Barhl2	ENSMUSG00000034384				NA	NA	NA	NA	NA	wo.orthology	nontarget
Barx1	ENSMUSG00000021381				NA	NA	NA	NA	NA	wo.orthology	nontarget
Basp1	ENSMUSG00000045763				NA	NA	NA	NA	NA	wo.orthology	nontarget
Batf	ENSMUSG00000034266				NA	NA	NA	NA	NA	wo.orthology	nontarget
Batf3	ENSMUSG00000026630				NA	NA	NA	NA	NA	wo.orthology	nontarget
Bax	ENSMUSG00000003873				NA	NA	NA	NA	NA	wo.orthology	nontarget
Baz1a	ENSMUSG00000035021	YLR399C		ortholog_many2many	3.47938	7.87172	NA	NA	0	w.orthology	nontarget
Baz1a	ENSMUSG00000035021	YDL070W		ortholog_many2many	3.15722	7.68025	NA	NA	0	w.orthology	nontarget
Baz1b	ENSMUSG00000002748	YLR399C		ortholog_many2many	3.65112	7.87172	NA	NA	0	w.orthology	DAZL.target
Baz1b	ENSMUSG00000002748	YDL070W		ortholog_many2many	3.65112	8.46395	NA	NA	0	w.orthology	DAZL.target
Baz2a	ENSMUSG00000040054	YGR252W	GCN5	ortholog_many2many	4.5575	19.59	NA	NA	0	w.orthology	DAZL.target
Baz2a	ENSMUSG00000040054	YLR399C		ortholog_many2many	2.96767	8.16327	NA	NA	0	w.orthology	DAZL.target
Baz2a	ENSMUSG00000040054	YDL070W		ortholog_many2many	3.23264	9.56113	NA	NA	0	w.orthology	DAZL.target
Baz2b	ENSMUSG00000026987	YDL070W		ortholog_many2many	3.10881	10.3448	NA	NA	0	w.orthology	DAZL.target
Baz2b	ENSMUSG00000026987	YLR399C		ortholog_many2many	2.9675	9.18367	NA	NA	0	w.orthology	DAZL.target
Bbc3	ENSMUSG00000002083				NA	NA	NA	NA	NA	wo.orthology	nontarget
Bbip1	ENSMUSG00000084957				NA	NA	NA	NA	NA	wo.orthology	DAZL.target
Bbof1	ENSMUSG00000057265				NA	NA	NA	NA	NA	wo.orthology	nontarget
Bbs1	ENSMUSG00000006464				NA	NA	NA	NA	NA	wo.orthology	nontarget
Bbs10	ENSMUSG00000035759				NA	NA	NA	NA	NA	wo.orthology	nontarget
Bbs12	ENSMUSG00000051444				NA	NA	NA	NA	NA	wo.orthology	nontarget
Bbs2	ENSMUSG00000031755				NA	NA	NA	NA	NA	wo.orthology	nontarget
Bbs4	ENSMUSG00000025235				NA	NA	NA	NA	NA	wo.orthology	nontarget
Bbs5	ENSMUSG00000063145				NA	NA	NA	NA	NA	wo.orthology	nontarget
Bbs7	ENSMUSG00000037325				NA	NA	NA	NA	NA	wo.orthology	nontarget
Bbs9	ENSMUSG00000035919				NA	NA	NA	NA	NA	wo.orthology	nontarget
Bbx	ENSMUSG00000022641				NA	NA	NA	NA	NA	wo.orthology	nontarget
BC003965	ENSMUSG00000067722				NA	NA	NA	NA	NA	wo.orthology	nontarget
BC004004	ENSMUSG00000052712				NA	NA	NA	NA	NA	wo.orthology	nontarget
BC005537	ENSMUSG00000019132				NA	NA	NA	NA	NA	wo.orthology	DAZL.target
BC005561	ENSMUSG00000079065	YNL139C	THO2	ortholog_one2many	6.04154	6.01127	NA	NA	0	w.orthology	nontarget
BC005624	ENSMUSG00000026851				NA	NA	NA	NA	NA	wo.orthology	nontarget
BC017158	ENSMUSG00000030780				NA	NA	NA	NA	NA	wo.orthology	nontarget
BC024978	ENSMUSG00000078786				NA	NA	NA	NA	NA	wo.orthology	nontarget
BC028528	ENSMUSG00000038543				NA	NA	NA	NA	NA	wo.orthology	nontarget
BC030867	ENSMUSG00000034773				NA	NA	NA	NA	NA	wo.orthology	nontarget
BC031181	ENSMUSG00000036299				NA	NA	NA	NA	NA	wo.orthology	nontarget
BC048403	ENSMUSG00000053684				NA	NA	NA	NA	NA	wo.orthology	DAZL.target
BC048507	ENSMUSG00000064063	YDR424C	DYN2	ortholog_one2many	48.3146	46.7391	NA	NA	1	w.orthology	nontarget
BC048644	ENSMUSG00000074052				NA	NA	NA	NA	NA	wo.orthology	nontarget
BC049715	ENSMUSG00000047515				NA	NA	NA	NA	NA	wo.orthology	nontarget
BC049762	ENSMUSG00000045942				NA	NA	NA	NA	NA	wo.orthology	nontarget
BC052040	ENSMUSG00000040282				NA	NA	NA	NA	NA	wo.orthology	nontarget
BC055324	ENSMUSG00000041406				NA	NA	NA	NA	NA	wo.orthology	nontarget
BC061237	ENSMUSG00000072145				NA	NA	NA	NA	NA	wo.orthology	nontarget
BC107364	ENSMUSG00000046317				NA	NA	NA	NA	NA	wo.orthology	nontarget
Bcan	ENSMUSG00000004892				NA	NA	NA	NA	NA	wo.orthology	nontarget
Bcap29	ENSMUSG00000020650	YDL072C		ortholog_many2many	20.4167	24.1379	NA	NA	0	w.orthology	DAZL.target
Bcap29	ENSMUSG00000020650	YKL065C		ortholog_many2many	20.4167	23.7864	NA	NA	0	w.orthology	DAZL.target
Bcap29	ENSMUSG00000020650	YMR040W		ortholog_many2many	15.8333	23.75	NA	NA	0	w.orthology	DAZL.target
Bcap31	ENSMUSG00000002015	YDL072C		ortholog_many2many	23.2653	28.0788	NA	NA	0	w.orthology	DAZL.target
Bcap31	ENSMUSG00000002015	YKL065C		ortholog_many2many	21.2245	25.2427	NA	NA	0	w.orthology	DAZL.target
Bcap31	ENSMUSG00000002015	YMR040W		ortholog_many2many	14.2857	21.875	NA	NA	0	w.orthology	DAZL.target
Bcar1	ENSMUSG00000031955				NA	NA	NA	NA	NA	wo.orthology	nontarget
Bcar3	ENSMUSG00000028121				NA	NA	NA	NA	NA	wo.orthology	nontarget
Bcas1	ENSMUSG00000013523				NA	NA	NA	NA	NA	wo.orthology	nontarget
Bcas2	ENSMUSG00000005687				NA	NA	NA	NA	NA	wo.orthology	DAZL.target
Bcas3	ENSMUSG00000059439				NA	NA	NA	NA	NA	wo.orthology	nontarget
Bcat2	ENSMUSG00000030826	YHR208W	BAT1	ortholog_many2many	42.2392	42.2392	NA	NA	0	w.orthology	nontarget
Bcat2	ENSMUSG00000030826	YJR148W	BAT2	ortholog_many2many	43.5115	45.4787	NA	NA	0	w.orthology	nontarget
Bccip	ENSMUSG00000030983	YDR361C		ortholog_one2one	16.1392	18.0212	NA	NA	0	w.orthology	nontarget
Bcdin3d	ENSMUSG00000037525				NA	NA	NA	NA	NA	wo.orthology	nontarget
Bckdha	ENSMUSG00000060376	YER178W		ortholog_one2many	20.852	22.1429	NA	NA	0	w.orthology	nontarget
Bckdhb	ENSMUSG00000032263				NA	NA	NA	NA	NA	wo.orthology	nontarget
Bckdk	ENSMUSG00000030802	YIL042C		ortholog_one2one	22.0874	23.0964	NA	NA	0	w.orthology	nontarget
Bcl10	ENSMUSG00000028191				NA	NA	NA	NA	NA	wo.orthology	DAZL.target
Bcl11a	ENSMUSG00000000861				NA	NA	NA	NA	NA	wo.orthology	nontarget
Bcl11b	ENSMUSG00000048251				NA	NA	NA	NA	NA	wo.orthology	nontarget
Bcl2l1	ENSMUSG00000007659				NA	NA	NA	NA	NA	wo.orthology	nontarget
Bcl2l11	ENSMUSG00000027381				NA	NA	NA	NA	NA	wo.orthology	nontarget
Bcl2l12	ENSMUSG00000003190				NA	NA	NA	NA	NA	wo.orthology	nontarget
Bcl2l13	ENSMUSG00000009112				NA	NA	NA	NA	NA	wo.orthology	nontarget
Bcl2l2	ENSMUSG00000089682				NA	NA	NA	NA	NA	wo.orthology	nontarget
Bcl6	ENSMUSG00000022508				NA	NA	NA	NA	NA	wo.orthology	nontarget
Bcl6b	ENSMUSG00000000317				NA	NA	NA	NA	NA	wo.orthology	DAZL.target
Bcl7a	ENSMUSG00000029438				NA	NA	NA	NA	NA	wo.orthology	DAZL.target
Bcl7b	ENSMUSG00000029681				NA	NA	NA	NA	NA	wo.orthology	nontarget
Bcl7c	ENSMUSG00000030814				NA	NA	NA	NA	NA	wo.orthology	nontarget
Bcl9	ENSMUSG00000038256				NA	NA	NA	NA	NA	wo.orthology	nontarget
Bcl9l	ENSMUSG00000063382				NA	NA	NA	NA	NA	wo.orthology	nontarget
Bclaf1	ENSMUSG00000037608				NA	NA	NA	NA	NA	wo.orthology	DAZL.target
Bclaf3	ENSMUSG00000044150				NA	NA	NA	NA	NA	wo.orthology	nontarget
Bco1	ENSMUSG00000031845				NA	NA	NA	NA	NA	wo.orthology	nontarget
Bco2	ENSMUSG00000032066				NA	NA	NA	NA	NA	wo.orthology	nontarget
Bcor	ENSMUSG00000040363				NA	NA	NA	NA	NA	wo.orthology	DAZL.target
Bcorl1	ENSMUSG00000036959				NA	NA	NA	NA	NA	wo.orthology	DAZL.target
Bcr	ENSMUSG00000009681				NA	NA	NA	NA	NA	wo.orthology	DAZL.target
Bcs1l	ENSMUSG00000026172	YDR375C		ortholog_one2one	48.5646	44.5175	NA	NA	1	w.orthology	nontarget
Bdh1	ENSMUSG00000046598				NA	NA	NA	NA	NA	wo.orthology	nontarget
Bdkrb2	ENSMUSG00000021070				NA	NA	NA	NA	NA	wo.orthology	nontarget
Bdnf	ENSMUSG00000048482				NA	NA	NA	NA	NA	wo.orthology	nontarget
Bdp1	ENSMUSG00000049658	YNL039W	BDP1	ortholog_one2one	3.20227	13.2997	NA	NA	0	w.orthology	DAZL.target
Bean1	ENSMUSG00000031872				NA	NA	NA	NA	NA	wo.orthology	nontarget
Becn1	ENSMUSG00000035086	YPL120W	VPS30	ortholog_one2many	25	20.1077	NA	NA	0	w.orthology	DAZL.target
Begain	ENSMUSG00000040867				NA	NA	NA	NA	NA	wo.orthology	nontarget
Bend3	ENSMUSG00000038214				NA	NA	NA	NA	NA	wo.orthology	nontarget
Bend4	ENSMUSG00000092060				NA	NA	NA	NA	NA	wo.orthology	DAZL.target
Bend5	ENSMUSG00000028545				NA	NA	NA	NA	NA	wo.orthology	nontarget
Bend6	ENSMUSG00000042182				NA	NA	NA	NA	NA	wo.orthology	nontarget
Bend7	ENSMUSG00000048186				NA	NA	NA	NA	NA	wo.orthology	nontarget
Best1	ENSMUSG00000037418				NA	NA	NA	NA	NA	wo.orthology	nontarget
Best3	ENSMUSG00000020169				NA	NA	NA	NA	NA	wo.orthology	nontarget
Bet1	ENSMUSG00000032757	YIL004C	BET1	ortholog_one2one	22.0339	18.3099	NA	NA	0	w.orthology	nontarget
Bet1l	ENSMUSG00000025484				NA	NA	NA	NA	NA	wo.orthology	nontarget
Bex1	ENSMUSG00000050071				NA	NA	NA	NA	NA	wo.orthology	nontarget
Bex2	ENSMUSG00000042750				NA	NA	NA	NA	NA	wo.orthology	nontarget
Bex3	ENSMUSG00000046432				NA	NA	NA	NA	NA	wo.orthology	nontarget
Bex4	ENSMUSG00000047844				NA	NA	NA	NA	NA	wo.orthology	nontarget
Bfar	ENSMUSG00000022684				NA	NA	NA	NA	NA	wo.orthology	nontarget
Bfsp1	ENSMUSG00000027420				NA	NA	NA	NA	NA	wo.orthology	nontarget
Bglap2	ENSMUSG00000074486				NA	NA	NA	NA	NA	wo.orthology	nontarget
Bglap3	ENSMUSG00000074489				NA	NA	NA	NA	NA	wo.orthology	nontarget
Bgn	ENSMUSG00000031375				NA	NA	NA	NA	NA	wo.orthology	nontarget
Bhlhb9	ENSMUSG00000072964				NA	NA	NA	NA	NA	wo.orthology	nontarget
Bhlhe41	ENSMUSG00000030256	YFR034C	PHO4	ortholog_one2many	8.78049	11.5385	NA	NA	0	w.orthology	DAZL.target
Bicc1	ENSMUSG00000014329				NA	NA	NA	NA	NA	wo.orthology	DAZL.target
Bicd1	ENSMUSG00000003452				NA	NA	NA	NA	NA	wo.orthology	nontarget
Bicd2	ENSMUSG00000037933				NA	NA	NA	NA	NA	wo.orthology	DAZL.target
Bicdl1	ENSMUSG00000041609				NA	NA	NA	NA	NA	wo.orthology	nontarget
Bicra	ENSMUSG00000070808				NA	NA	NA	NA	NA	wo.orthology	nontarget
Bicral	ENSMUSG00000036568				NA	NA	NA	NA	NA	wo.orthology	nontarget
Bid	ENSMUSG00000004446				NA	NA	NA	NA	NA	wo.orthology	nontarget
Bik	ENSMUSG00000016758				NA	NA	NA	NA	NA	wo.orthology	nontarget
Bin1	ENSMUSG00000024381	YBL085W	BOI1	ortholog_many2many	20.5782	12.3469	NA	NA	0	w.orthology	nontarget
Bin1	ENSMUSG00000024381	YER114C	BOI2	ortholog_many2many	20.068	11.3462	NA	NA	0	w.orthology	nontarget
Bin2	ENSMUSG00000098112	YER114C	BOI2	ortholog_many2many	18.6139	9.03846	NA	NA	0	w.orthology	nontarget
Bin2	ENSMUSG00000098112	YBL085W	BOI1	ortholog_many2many	18.4158	9.4898	NA	NA	0	w.orthology	nontarget
Bin3	ENSMUSG00000022089	YCR009C	RVS161	ortholog_one2one	30.83	29.434	NA	NA	1	w.orthology	nontarget
Birc2	ENSMUSG00000057367				NA	NA	NA	NA	NA	wo.orthology	nontarget
Birc3	ENSMUSG00000032000				NA	NA	NA	NA	NA	wo.orthology	nontarget
Birc5	ENSMUSG00000017716				NA	NA	NA	NA	NA	wo.orthology	nontarget
Birc6	ENSMUSG00000024073				NA	NA	NA	NA	NA	wo.orthology	DAZL.target
Bivm	ENSMUSG00000041684				NA	NA	NA	NA	NA	wo.orthology	nontarget
Blcap	ENSMUSG00000067787				NA	NA	NA	NA	NA	wo.orthology	DAZL.target
Blm	ENSMUSG00000030528	YMR190C		ortholog_one2one	21.635	21.2163	NA	NA	0	w.orthology	DAZL.target
Blmh	ENSMUSG00000020840	YNL239W	LAP3	ortholog_one2one	36.7033	36.7841	NA	NA	1	w.orthology	nontarget
Bloc1s1	ENSMUSG00000090247				NA	NA	NA	NA	NA	wo.orthology	nontarget
Bloc1s2	ENSMUSG00000057506				NA	NA	NA	NA	NA	wo.orthology	nontarget
Bloc1s3	ENSMUSG00000057667				NA	NA	NA	NA	NA	wo.orthology	nontarget
Bloc1s4	ENSMUSG00000060708				NA	NA	NA	NA	NA	wo.orthology	nontarget
Bloc1s5	ENSMUSG00000038982				NA	NA	NA	NA	NA	wo.orthology	nontarget
Bloc1s6	ENSMUSG00000005804				NA	NA	NA	NA	NA	wo.orthology	DAZL.target
Blvra	ENSMUSG00000001999				NA	NA	NA	NA	NA	wo.orthology	nontarget
Blvrb	ENSMUSG00000040466	YMR090W		ortholog_one2one	18.4466	16.7401	NA	NA	0	w.orthology	nontarget
Blzf1	ENSMUSG00000026577				NA	NA	NA	NA	NA	wo.orthology	nontarget
Bmf	ENSMUSG00000040093				NA	NA	NA	NA	NA	wo.orthology	nontarget
Bmi1	ENSMUSG00000026739				NA	NA	NA	NA	NA	wo.orthology	DAZL.target
Bmp2k	ENSMUSG00000034663	YNL020C		ortholog_many2many	14.8506	26.489	NA	NA	0	w.orthology	nontarget
Bmp2k	ENSMUSG00000034663	YIL095W	PRK1	ortholog_many2many	16.1687	22.716	NA	NA	0	w.orthology	nontarget
Bmp3	ENSMUSG00000029335				NA	NA	NA	NA	NA	wo.orthology	nontarget
Bmp4	ENSMUSG00000021835				NA	NA	NA	NA	NA	wo.orthology	nontarget
Bmp5	ENSMUSG00000032179				NA	NA	NA	NA	NA	wo.orthology	nontarget
Bmp6	ENSMUSG00000039004				NA	NA	NA	NA	NA	wo.orthology	DAZL.target
Bmp7	ENSMUSG00000008999				NA	NA	NA	NA	NA	wo.orthology	nontarget
Bmp8b	ENSMUSG00000002384				NA	NA	NA	NA	NA	wo.orthology	nontarget
Bmpr1a	ENSMUSG00000021796				NA	NA	NA	NA	NA	wo.orthology	DAZL.target
Bmpr1b	ENSMUSG00000052430				NA	NA	NA	NA	NA	wo.orthology	nontarget
Bmpr2	ENSMUSG00000067336				NA	NA	NA	NA	NA	wo.orthology	nontarget
Bms1	ENSMUSG00000030138	YPL217C		ortholog_one2one	38.0841	41.3356	NA	NA	0	w.orthology	nontarget
Bmt2	ENSMUSG00000042742				NA	NA	NA	NA	NA	wo.orthology	nontarget
Bmyc	ENSMUSG00000049086				NA	NA	NA	NA	NA	wo.orthology	nontarget
Bnc1	ENSMUSG00000025105				NA	NA	NA	NA	NA	wo.orthology	DAZL.target
Bnc2	ENSMUSG00000028487				NA	NA	NA	NA	NA	wo.orthology	DAZL.target
Bnip1	ENSMUSG00000024191	YDR498C		ortholog_one2one	13.5965	8.094	NA	NA	0	w.orthology	nontarget
Bnip2	ENSMUSG00000011958				NA	NA	NA	NA	NA	wo.orthology	nontarget
Bnip3	ENSMUSG00000078566				NA	NA	NA	NA	NA	wo.orthology	DAZL.target
Bnip3l	ENSMUSG00000022051				NA	NA	NA	NA	NA	wo.orthology	DAZL.target
Boc	ENSMUSG00000022687				NA	NA	NA	NA	NA	wo.orthology	nontarget
Bod1	ENSMUSG00000044502				NA	NA	NA	NA	NA	wo.orthology	DAZL.target
Bod1l	ENSMUSG00000061755				NA	NA	NA	NA	NA	wo.orthology	nontarget
Bok	ENSMUSG00000026278				NA	NA	NA	NA	NA	wo.orthology	nontarget
Bola1	ENSMUSG00000015943	YAL044W-A		ortholog_many2many	26.2774	32.7273	NA	NA	0	w.orthology	nontarget
Bola2	ENSMUSG00000047721	YGL220W	FRA2	ortholog_one2one	37.2093	26.6667	NA	NA	1	w.orthology	nontarget
Bola3	ENSMUSG00000045160	YAL046C		ortholog_one2one	25.4545	23.7288	NA	NA	0	w.orthology	nontarget
Boll	ENSMUSG00000025977				NA	NA	NA	NA	NA	wo.orthology	nontarget
Bop1	ENSMUSG00000022557	YMR049C		ortholog_one2one	36.8852	33.4572	NA	NA	1	w.orthology	nontarget
Borcs5	ENSMUSG00000042992				NA	NA	NA	NA	NA	wo.orthology	nontarget
Borcs6	ENSMUSG00000045176				NA	NA	NA	NA	NA	wo.orthology	nontarget
Borcs7	ENSMUSG00000062376				NA	NA	NA	NA	NA	wo.orthology	nontarget
Borcs8	ENSMUSG00000002345				NA	NA	NA	NA	NA	wo.orthology	nontarget
Bpgm	ENSMUSG00000038871	YKL152C		ortholog_many2many	45.9459	48.1781	NA	NA	1	w.orthology	nontarget
Bpgm	ENSMUSG00000038871	YDL021W		ortholog_many2many	35.1351	29.2605	NA	NA	1	w.orthology	nontarget
Bpgm	ENSMUSG00000038871	YOL056W		ortholog_many2many	37.0656	31.6832	NA	NA	1	w.orthology	nontarget
Bphl	ENSMUSG00000038286	YGR110W		ortholog_many2many	17.1821	11.236	NA	NA	0	w.orthology	nontarget
Bphl	ENSMUSG00000038286	YBR204C		ortholog_many2many	15.4639	12	NA	NA	0	w.orthology	nontarget
Bpifc	ENSMUSG00000050108				NA	NA	NA	NA	NA	wo.orthology	nontarget
Bpnt1	ENSMUSG00000026617				NA	NA	NA	NA	NA	wo.orthology	nontarget
Bptf	ENSMUSG00000040481	YLR399C		ortholog_many2many	1.67751	7.14286	NA	NA	0	w.orthology	nontarget
Bptf	ENSMUSG00000040481	YDL070W		ortholog_many2many	1.91715	8.77743	NA	NA	0	w.orthology	nontarget
Braf	ENSMUSG00000002413				NA	NA	NA	NA	NA	wo.orthology	DAZL.target
Brap	ENSMUSG00000029458	YHL010C	ETP1	ortholog_one2one	29.1032	29.4017	NA	NA	1	w.orthology	nontarget
Brat1	ENSMUSG00000000148				NA	NA	NA	NA	NA	wo.orthology	DAZL.target
Brca1	ENSMUSG00000017146				NA	NA	NA	NA	NA	wo.orthology	nontarget
Brca2	ENSMUSG00000041147				NA	NA	NA	NA	NA	wo.orthology	nontarget
Brcc3	ENSMUSG00000031201				NA	NA	NA	NA	NA	wo.orthology	nontarget
Brd1	ENSMUSG00000022387	YPR031W		ortholog_one2many	16.2321	25.8021	NA	NA	0	w.orthology	DAZL.target
Brd2	ENSMUSG00000024335	YLR399C		ortholog_many2many	21.9298	25.5102	NA	NA	0	w.orthology	DAZL.target
Brd2	ENSMUSG00000024335	YDL070W		ortholog_many2many	20.3008	25.3918	NA	NA	0	w.orthology	DAZL.target
Brd3	ENSMUSG00000026918	YDL070W		ortholog_many2many	22.2073	25.8621	NA	NA	0	w.orthology	DAZL.target
Brd3	ENSMUSG00000026918	YLR399C		ortholog_many2many	22.0727	23.9067	NA	NA	0	w.orthology	DAZL.target
Brd3os	ENSMUSG00000109946				NA	NA	NA	NA	NA	wo.orthology	nontarget
Brd4	ENSMUSG00000024002	YDL070W		ortholog_many2many	11.8487	26.0188	NA	NA	0	w.orthology	DAZL.target
Brd4	ENSMUSG00000024002	YLR399C		ortholog_many2many	12.5625	25.656	NA	NA	0	w.orthology	DAZL.target
Brd4	ENSMUSG00000024002	YGR252W	GCN5	ortholog_many2many	2.78373	8.88383	NA	NA	0	w.orthology	DAZL.target
Brd7	ENSMUSG00000031660				NA	NA	NA	NA	NA	wo.orthology	DAZL.target
Brd8	ENSMUSG00000003778				NA	NA	NA	NA	NA	wo.orthology	nontarget
Brd9	ENSMUSG00000057649				NA	NA	NA	NA	NA	wo.orthology	nontarget
Brdt	ENSMUSG00000029279	YLR399C		ortholog_many2many	16.5272	23.0321	NA	NA	0	w.orthology	DAZL.target
Brdt	ENSMUSG00000029279	YGR252W	GCN5	ortholog_many2many	2.61506	5.69476	NA	NA	0	w.orthology	DAZL.target
Brdt	ENSMUSG00000029279	YDL070W		ortholog_many2many	16.4226	24.6082	NA	NA	0	w.orthology	DAZL.target
Brf1	ENSMUSG00000011158	YGR246C	BRF1	ortholog_one2one	27.071	30.7047	NA	NA	1	w.orthology	nontarget
Brf2	ENSMUSG00000031487				NA	NA	NA	NA	NA	wo.orthology	nontarget
Bri3	ENSMUSG00000047843				NA	NA	NA	NA	NA	wo.orthology	nontarget
Bri3bp	ENSMUSG00000037905				NA	NA	NA	NA	NA	wo.orthology	nontarget
Brinp1	ENSMUSG00000028351				NA	NA	NA	NA	NA	wo.orthology	nontarget
Brinp2	ENSMUSG00000004031				NA	NA	NA	NA	NA	wo.orthology	nontarget
Brip1	ENSMUSG00000034329				NA	NA	NA	NA	NA	wo.orthology	nontarget
Brix1	ENSMUSG00000022247	YOL077C		ortholog_one2one	37.1105	45.0172	NA	NA	1	w.orthology	nontarget
Brk1	ENSMUSG00000033940				NA	NA	NA	NA	NA	wo.orthology	DAZL.target
Brms1	ENSMUSG00000080268				NA	NA	NA	NA	NA	wo.orthology	nontarget
Brms1l	ENSMUSG00000012076				NA	NA	NA	NA	NA	wo.orthology	nontarget
Brox	ENSMUSG00000046836				NA	NA	NA	NA	NA	wo.orthology	nontarget
Brpf1	ENSMUSG00000001632	YPR031W		ortholog_one2many	15.1564	25.2674	NA	NA	0	w.orthology	nontarget
Brpf3	ENSMUSG00000063952	YPR031W		ortholog_one2many	16.2791	26.2032	NA	NA	0	w.orthology	nontarget
Brsk1	ENSMUSG00000035390	YPL141C		ortholog_many2many	22.2365	20	NA	NA	0	w.orthology	nontarget
Brsk1	ENSMUSG00000035390	YDL214C		ortholog_many2many	10.5398	11.731	NA	NA	0	w.orthology	nontarget
Brsk1	ENSMUSG00000035390	YNL183C		ortholog_many2many	11.3111	11.1392	NA	NA	0	w.orthology	nontarget
Brsk1	ENSMUSG00000035390	YOR233W	KIN4	ortholog_many2many	20.0514	19.5	NA	NA	0	w.orthology	nontarget
Brsk1	ENSMUSG00000035390	YLR096W		ortholog_many2many	19.1517	12.9904	NA	NA	0	w.orthology	nontarget
Brsk1	ENSMUSG00000035390	YDR247W		ortholog_many2many	13.3676	22.5597	NA	NA	0	w.orthology	nontarget
Brsk1	ENSMUSG00000035390	YKL198C	PTK1	ortholog_many2many	14.2674	16.7674	NA	NA	0	w.orthology	nontarget
Brsk1	ENSMUSG00000035390	YJL165C		ortholog_many2many	11.6967	10.6433	NA	NA	0	w.orthology	nontarget
Brsk1	ENSMUSG00000035390	YJR059W	PTK2	ortholog_many2many	14.0103	13.3252	NA	NA	0	w.orthology	nontarget
Brsk1	ENSMUSG00000035390	YPL026C	SKS1	ortholog_many2many	14.653	22.7092	NA	NA	0	w.orthology	nontarget
Brsk1	ENSMUSG00000035390	YDR122W		ortholog_many2many	19.4087	14.1917	NA	NA	0	w.orthology	nontarget
Brsk1	ENSMUSG00000035390	YKL168C		ortholog_many2many	11.1825	12.0166	NA	NA	0	w.orthology	nontarget
Brsk2	ENSMUSG00000053046	YOR233W	KIN4	ortholog_many2many	22.114	19.875	NA	NA	0	w.orthology	DAZL.target
Brsk2	ENSMUSG00000053046	YKL198C	PTK1	ortholog_many2many	15.7163	17.0695	NA	NA	0	w.orthology	DAZL.target
Brsk2	ENSMUSG00000053046	YJR059W	PTK2	ortholog_many2many	15.1599	13.3252	NA	NA	0	w.orthology	DAZL.target
Brsk2	ENSMUSG00000053046	YDR122W		ortholog_many2many	21.2796	14.3797	NA	NA	0	w.orthology	DAZL.target
Brsk2	ENSMUSG00000053046	YDL214C		ortholog_many2many	12.5174	12.8755	NA	NA	0	w.orthology	DAZL.target
Brsk2	ENSMUSG00000053046	YPL141C		ortholog_many2many	24.7566	20.578	NA	NA	0	w.orthology	DAZL.target
Brsk2	ENSMUSG00000053046	YDR507C	GIN4	ortholog_many2many	24.2003	15.2364	NA	NA	0	w.orthology	DAZL.target
Brsk2	ENSMUSG00000053046	YKL168C		ortholog_many2many	11.2656	11.1878	NA	NA	0	w.orthology	DAZL.target
Brsk2	ENSMUSG00000053046	YCL024W		ortholog_many2many	24.0612	16.6827	NA	NA	0	w.orthology	DAZL.target
Brsk2	ENSMUSG00000053046	YLR096W		ortholog_many2many	21.5577	13.5135	NA	NA	0	w.orthology	DAZL.target
Brsk2	ENSMUSG00000053046	YNL183C		ortholog_many2many	12.6565	11.519	NA	NA	0	w.orthology	DAZL.target
Brsk2	ENSMUSG00000053046	YJL165C		ortholog_many2many	12.3783	10.4094	NA	NA	0	w.orthology	DAZL.target
Brsk2	ENSMUSG00000053046	YDR247W		ortholog_many2many	14.3255	22.3427	NA	NA	0	w.orthology	DAZL.target
Brsk2	ENSMUSG00000053046	YPL026C	SKS1	ortholog_many2many	15.8554	22.7092	NA	NA	0	w.orthology	DAZL.target
Brwd1	ENSMUSG00000022914				NA	NA	NA	NA	NA	wo.orthology	DAZL.target
Brwd3	ENSMUSG00000063663				NA	NA	NA	NA	NA	wo.orthology	nontarget
Bscl2	ENSMUSG00000071657				NA	NA	NA	NA	NA	wo.orthology	nontarget
Bsdc1	ENSMUSG00000040859				NA	NA	NA	NA	NA	wo.orthology	nontarget
Bsg	ENSMUSG00000023175				NA	NA	NA	NA	NA	wo.orthology	nontarget
Bspry	ENSMUSG00000028392				NA	NA	NA	NA	NA	wo.orthology	nontarget
Bst2	ENSMUSG00000046718				NA	NA	NA	NA	NA	wo.orthology	nontarget
Btaf1	ENSMUSG00000040565	YPL082C	MOT1	ortholog_one2one	38.2576	37.8682	NA	NA	1	w.orthology	DAZL.target
Btbd1	ENSMUSG00000025103				NA	NA	NA	NA	NA	wo.orthology	nontarget
Btbd10	ENSMUSG00000038187				NA	NA	NA	NA	NA	wo.orthology	DAZL.target
Btbd11	ENSMUSG00000020042				NA	NA	NA	NA	NA	wo.orthology	nontarget
Btbd16	ENSMUSG00000040298				NA	NA	NA	NA	NA	wo.orthology	nontarget
Btbd18	ENSMUSG00000086598				NA	NA	NA	NA	NA	wo.orthology	nontarget
Btbd2	ENSMUSG00000003344				NA	NA	NA	NA	NA	wo.orthology	nontarget
Btbd3	ENSMUSG00000062098				NA	NA	NA	NA	NA	wo.orthology	DAZL.target
Btbd6	ENSMUSG00000002803				NA	NA	NA	NA	NA	wo.orthology	nontarget
Btbd7	ENSMUSG00000041702				NA	NA	NA	NA	NA	wo.orthology	DAZL.target
Btbd8	ENSMUSG00000111375				NA	NA	NA	NA	NA	wo.orthology	nontarget
Btbd9	ENSMUSG00000062202				NA	NA	NA	NA	NA	wo.orthology	nontarget
Btc	ENSMUSG00000082361				NA	NA	NA	NA	NA	wo.orthology	nontarget
Btd	ENSMUSG00000021900				NA	NA	NA	NA	NA	wo.orthology	nontarget
Btf3	ENSMUSG00000021660				NA	NA	NA	NA	NA	wo.orthology	nontarget
Btf3l4	ENSMUSG00000028568				NA	NA	NA	NA	NA	wo.orthology	nontarget
Btg1	ENSMUSG00000036478				NA	NA	NA	NA	NA	wo.orthology	nontarget
Btg2	ENSMUSG00000020423				NA	NA	NA	NA	NA	wo.orthology	nontarget
Btg3	ENSMUSG00000022863				NA	NA	NA	NA	NA	wo.orthology	nontarget
Btn2a2	ENSMUSG00000053216				NA	NA	NA	NA	NA	wo.orthology	nontarget
Btnl10	ENSMUSG00000020490				NA	NA	NA	NA	NA	wo.orthology	nontarget
Btnl4	ENSMUSG00000058435				NA	NA	NA	NA	NA	wo.orthology	nontarget
Btrc	ENSMUSG00000025217	YKR036C		ortholog_many2many	13.0579	12.2862	NA	NA	0	w.orthology	nontarget
Btrc	ENSMUSG00000025217	YJL112W	MDV1	ortholog_many2many	13.5537	11.4846	NA	NA	0	w.orthology	nontarget
Bub1	ENSMUSG00000027379	YJL013C		ortholog_many2many	7.83758	16.1165	NA	NA	0	w.orthology	nontarget
Bub1	ENSMUSG00000027379	YGR188C		ortholog_many2many	17.2805	17.9236	NA	NA	0	w.orthology	nontarget
Bub1b	ENSMUSG00000040084	YGR188C		ortholog_many2many	15.3042	15.7689	NA	NA	0	w.orthology	DAZL.target
Bub1b	ENSMUSG00000040084	YJL013C		ortholog_many2many	9.41065	19.2233	NA	NA	0	w.orthology	DAZL.target
Bub3	ENSMUSG00000066979	YOR026W		ortholog_one2many	31.2883	29.912	NA	NA	1	w.orthology	DAZL.target
Bud13	ENSMUSG00000032077	YGL174W	BUD13	ortholog_one2one	9.41915	22.5564	NA	NA	0	w.orthology	nontarget
Bud23	ENSMUSG00000005378	YCR047C		ortholog_one2one	47.6868	48.7273	NA	NA	1	w.orthology	nontarget
Bud31	ENSMUSG00000038722	YCR063W	BUD31	ortholog_one2one	54.1667	49.6815	NA	NA	1	w.orthology	nontarget
Bves	ENSMUSG00000071317				NA	NA	NA	NA	NA	wo.orthology	nontarget
Bysl	ENSMUSG00000023988	YBR247C	ENP1	ortholog_one2one	38.0734	34.3685	NA	NA	1	w.orthology	nontarget
Bzw1	ENSMUSG00000051223				NA	NA	NA	NA	NA	wo.orthology	DAZL.target
Bzw2	ENSMUSG00000020547				NA	NA	NA	NA	NA	wo.orthology	nontarget
C130050O18Rik	ENSMUSG00000044092				NA	NA	NA	NA	NA	wo.orthology	nontarget
C130074G19Rik	ENSMUSG00000039349				NA	NA	NA	NA	NA	wo.orthology	nontarget
C1d	ENSMUSG00000000581				NA	NA	NA	NA	NA	wo.orthology	DAZL.target
C1galt1	ENSMUSG00000042460				NA	NA	NA	NA	NA	wo.orthology	nontarget
C1galt1c1	ENSMUSG00000048970				NA	NA	NA	NA	NA	wo.orthology	nontarget
C1qbp	ENSMUSG00000018446	YIL070C		ortholog_one2one	17.2043	18.0451	NA	NA	0	w.orthology	nontarget
C1ql1	ENSMUSG00000045532				NA	NA	NA	NA	NA	wo.orthology	nontarget
C1qtnf12	ENSMUSG00000023571				NA	NA	NA	NA	NA	wo.orthology	nontarget
C1qtnf3	ENSMUSG00000058914				NA	NA	NA	NA	NA	wo.orthology	nontarget
C1qtnf4	ENSMUSG00000110961				NA	NA	NA	NA	NA	wo.orthology	nontarget
C1qtnf4	ENSMUSG00000040794				NA	NA	NA	NA	NA	wo.orthology	nontarget
C1qtnf5	ENSMUSG00000079592				NA	NA	NA	NA	NA	wo.orthology	nontarget
C1qtnf6	ENSMUSG00000022440				NA	NA	NA	NA	NA	wo.orthology	nontarget
C1rl	ENSMUSG00000038527				NA	NA	NA	NA	NA	wo.orthology	nontarget
C2cd2	ENSMUSG00000045975				NA	NA	NA	NA	NA	wo.orthology	nontarget
C2cd2l	ENSMUSG00000032120				NA	NA	NA	NA	NA	wo.orthology	nontarget
C2cd3	ENSMUSG00000047248				NA	NA	NA	NA	NA	wo.orthology	nontarget
C2cd4a	ENSMUSG00000047990				NA	NA	NA	NA	NA	wo.orthology	nontarget
C2cd5	ENSMUSG00000030279				NA	NA	NA	NA	NA	wo.orthology	nontarget
C330007P06Rik	ENSMUSG00000006423				NA	NA	NA	NA	NA	wo.orthology	nontarget
C330018D20Rik	ENSMUSG00000024592				NA	NA	NA	NA	NA	wo.orthology	nontarget
C4a	ENSMUSG00000015451				NA	NA	NA	NA	NA	wo.orthology	nontarget
C530008M17Rik	ENSMUSG00000036377				NA	NA	NA	NA	NA	wo.orthology	nontarget
C5ar2	ENSMUSG00000074361				NA	NA	NA	NA	NA	wo.orthology	nontarget
C77080	ENSMUSG00000050390				NA	NA	NA	NA	NA	wo.orthology	nontarget
C87436	ENSMUSG00000046679				NA	NA	NA	NA	NA	wo.orthology	nontarget
C87977	ENSMUSG00000046262				NA	NA	NA	NA	NA	wo.orthology	nontarget
C8b	ENSMUSG00000029656				NA	NA	NA	NA	NA	wo.orthology	nontarget
C8g	ENSMUSG00000015083				NA	NA	NA	NA	NA	wo.orthology	nontarget
C9orf72	ENSMUSG00000028300				NA	NA	NA	NA	NA	wo.orthology	nontarget
Caap1	ENSMUSG00000028578				NA	NA	NA	NA	NA	wo.orthology	nontarget
Cab39	ENSMUSG00000036707	YKL189W		ortholog_one2many	33.7243	28.8221	NA	NA	1	w.orthology	DAZL.target
Cab39l	ENSMUSG00000021981	YKL189W		ortholog_one2many	33.8279	28.5714	NA	NA	1	w.orthology	DAZL.target
Cabcoco1	ENSMUSG00000019945				NA	NA	NA	NA	NA	wo.orthology	nontarget
Cabin1	ENSMUSG00000020196				NA	NA	NA	NA	NA	wo.orthology	nontarget
Cables1	ENSMUSG00000040957				NA	NA	NA	NA	NA	wo.orthology	nontarget
Cables2	ENSMUSG00000038990				NA	NA	NA	NA	NA	wo.orthology	DAZL.target
Cabyr	ENSMUSG00000024430				NA	NA	NA	NA	NA	wo.orthology	nontarget
Cacfd1	ENSMUSG00000015488				NA	NA	NA	NA	NA	wo.orthology	DAZL.target
Cachd1	ENSMUSG00000028532				NA	NA	NA	NA	NA	wo.orthology	nontarget
Cacna1a	ENSMUSG00000034656				NA	NA	NA	NA	NA	wo.orthology	nontarget
Cacna1b	ENSMUSG00000004113				NA	NA	NA	NA	NA	wo.orthology	nontarget
Cacna1c	ENSMUSG00000051331				NA	NA	NA	NA	NA	wo.orthology	nontarget
Cacna1d	ENSMUSG00000015968				NA	NA	NA	NA	NA	wo.orthology	nontarget
Cacna1h	ENSMUSG00000024112				NA	NA	NA	NA	NA	wo.orthology	nontarget
Cacna2d1	ENSMUSG00000040118				NA	NA	NA	NA	NA	wo.orthology	nontarget
Cacna2d2	ENSMUSG00000010066				NA	NA	NA	NA	NA	wo.orthology	nontarget
Cacna2d3	ENSMUSG00000021991				NA	NA	NA	NA	NA	wo.orthology	nontarget
Cacnb1	ENSMUSG00000020882				NA	NA	NA	NA	NA	wo.orthology	nontarget
Cacnb3	ENSMUSG00000003352				NA	NA	NA	NA	NA	wo.orthology	nontarget
Cacnb4	ENSMUSG00000017412				NA	NA	NA	NA	NA	wo.orthology	nontarget
Cacng4	ENSMUSG00000020723				NA	NA	NA	NA	NA	wo.orthology	nontarget
Cacng6	ENSMUSG00000097894				NA	NA	NA	NA	NA	wo.orthology	nontarget
Cacng6	ENSMUSG00000078815				NA	NA	NA	NA	NA	wo.orthology	nontarget
Cacng7	ENSMUSG00000096998				NA	NA	NA	NA	NA	wo.orthology	nontarget
Cacng7	ENSMUSG00000069806				NA	NA	NA	NA	NA	wo.orthology	nontarget
Cacng8	ENSMUSG00000053395				NA	NA	NA	NA	NA	wo.orthology	nontarget
Cacng8	ENSMUSG00000106728				NA	NA	NA	NA	NA	wo.orthology	nontarget
Cactin	ENSMUSG00000034889				NA	NA	NA	NA	NA	wo.orthology	nontarget
Cacul1	ENSMUSG00000033417				NA	NA	NA	NA	NA	wo.orthology	DAZL.target
Cacybp	ENSMUSG00000014226				NA	NA	NA	NA	NA	wo.orthology	DAZL.target
Cad	ENSMUSG00000013629	YOR303W		ortholog_one2many	7.86517	42.5791	NA	NA	0	w.orthology	DAZL.target
Cad	ENSMUSG00000013629	YJL130C		ortholog_one2many	49.8427	50.0903	NA	NA	1	w.orthology	DAZL.target
Cadm1	ENSMUSG00000032076				NA	NA	NA	NA	NA	wo.orthology	DAZL.target
Cadm4	ENSMUSG00000054793				NA	NA	NA	NA	NA	wo.orthology	nontarget
Cadps2	ENSMUSG00000017978				NA	NA	NA	NA	NA	wo.orthology	nontarget
Cage1	ENSMUSG00000044566				NA	NA	NA	NA	NA	wo.orthology	nontarget
Calb2	ENSMUSG00000003657				NA	NA	NA	NA	NA	wo.orthology	nontarget
Calcoco1	ENSMUSG00000023055				NA	NA	NA	NA	NA	wo.orthology	nontarget
Calcrl	ENSMUSG00000059588				NA	NA	NA	NA	NA	wo.orthology	nontarget
Cald1	ENSMUSG00000029761				NA	NA	NA	NA	NA	wo.orthology	nontarget
Calm1	ENSMUSG00000001175				NA	NA	NA	NA	NA	wo.orthology	DAZL.target
Calm2	ENSMUSG00000036438				NA	NA	NA	NA	NA	wo.orthology	DAZL.target
Calm3	ENSMUSG00000019370				NA	NA	NA	NA	NA	wo.orthology	DAZL.target
Calml4	ENSMUSG00000032246				NA	NA	NA	NA	NA	wo.orthology	nontarget
Calr	ENSMUSG00000003814	YAL058W	CNE1	ortholog_one2many	25.9615	21.5139	NA	NA	0	w.orthology	DAZL.target
Calr3	ENSMUSG00000019732	YAL058W	CNE1	ortholog_one2many	19.2105	14.5418	NA	NA	0	w.orthology	nontarget
Calr4	ENSMUSG00000028558	YAL058W	CNE1	ortholog_one2many	23.0952	19.3227	NA	NA	0	w.orthology	nontarget
Calu	ENSMUSG00000029767				NA	NA	NA	NA	NA	wo.orthology	DAZL.target
Caly	ENSMUSG00000025468				NA	NA	NA	NA	NA	wo.orthology	nontarget
Camk1d	ENSMUSG00000039145				NA	NA	NA	NA	NA	wo.orthology	nontarget
Camk1g	ENSMUSG00000016179				NA	NA	NA	NA	NA	wo.orthology	nontarget
Camk2a	ENSMUSG00000024617				NA	NA	NA	NA	NA	wo.orthology	nontarget
Camk2b	ENSMUSG00000057897				NA	NA	NA	NA	NA	wo.orthology	nontarget
Camk2d	ENSMUSG00000053819				NA	NA	NA	NA	NA	wo.orthology	nontarget
Camk2g	ENSMUSG00000021820				NA	NA	NA	NA	NA	wo.orthology	DAZL.target
Camk2n1	ENSMUSG00000046447				NA	NA	NA	NA	NA	wo.orthology	nontarget
Camk2n2	ENSMUSG00000051146				NA	NA	NA	NA	NA	wo.orthology	nontarget
Camk4	ENSMUSG00000038128				NA	NA	NA	NA	NA	wo.orthology	nontarget
Camkk1	ENSMUSG00000020785				NA	NA	NA	NA	NA	wo.orthology	nontarget
Camkk2	ENSMUSG00000029471	YGL179C		ortholog_one2many	20.7483	21.7857	NA	NA	0	w.orthology	DAZL.target
Camkk2	ENSMUSG00000029471	YER129W	SAK1	ortholog_one2many	25.1701	12.9597	NA	NA	0	w.orthology	DAZL.target
Camkmt	ENSMUSG00000071037				NA	NA	NA	NA	NA	wo.orthology	nontarget
Camkv	ENSMUSG00000032936				NA	NA	NA	NA	NA	wo.orthology	nontarget
Caml	ENSMUSG00000021501				NA	NA	NA	NA	NA	wo.orthology	nontarget
Camsap1	ENSMUSG00000026933				NA	NA	NA	NA	NA	wo.orthology	DAZL.target
Camsap2	ENSMUSG00000041570				NA	NA	NA	NA	NA	wo.orthology	DAZL.target
Camsap3	ENSMUSG00000044433				NA	NA	NA	NA	NA	wo.orthology	nontarget
Camta1	ENSMUSG00000014592				NA	NA	NA	NA	NA	wo.orthology	nontarget
Camta2	ENSMUSG00000040712				NA	NA	NA	NA	NA	wo.orthology	nontarget
Cand1	ENSMUSG00000020114				NA	NA	NA	NA	NA	wo.orthology	DAZL.target
Cand2	ENSMUSG00000030319				NA	NA	NA	NA	NA	wo.orthology	DAZL.target
Cant1	ENSMUSG00000025575				NA	NA	NA	NA	NA	wo.orthology	nontarget
Canx	ENSMUSG00000020368	YAL058W	CNE1	ortholog_one2many	25.5499	30.0797	NA	NA	1	w.orthology	DAZL.target
Cap1	ENSMUSG00000028656	YNL138W	SRV2	ortholog_one2many	36.7089	33.0798	NA	NA	1	w.orthology	nontarget
Cap2	ENSMUSG00000021373	YNL138W	SRV2	ortholog_one2many	36.5546	33.0798	NA	NA	1	w.orthology	nontarget
Capg	ENSMUSG00000056737				NA	NA	NA	NA	NA	wo.orthology	nontarget
Capn1	ENSMUSG00000024942				NA	NA	NA	NA	NA	wo.orthology	nontarget
Capn10	ENSMUSG00000026270				NA	NA	NA	NA	NA	wo.orthology	nontarget
Capn15	ENSMUSG00000037326				NA	NA	NA	NA	NA	wo.orthology	nontarget
Capn2	ENSMUSG00000026509				NA	NA	NA	NA	NA	wo.orthology	nontarget
Capn5	ENSMUSG00000035547				NA	NA	NA	NA	NA	wo.orthology	nontarget
Capn6	ENSMUSG00000067276				NA	NA	NA	NA	NA	wo.orthology	nontarget
Capn7	ENSMUSG00000021893				NA	NA	NA	NA	NA	wo.orthology	DAZL.target
Capns1	ENSMUSG00000001794				NA	NA	NA	NA	NA	wo.orthology	nontarget
Capns2	ENSMUSG00000078144				NA	NA	NA	NA	NA	wo.orthology	nontarget
Caprin1	ENSMUSG00000027184				NA	NA	NA	NA	NA	wo.orthology	DAZL.target
Caprin2	ENSMUSG00000030309				NA	NA	NA	NA	NA	wo.orthology	nontarget
Capsl	ENSMUSG00000039676				NA	NA	NA	NA	NA	wo.orthology	nontarget
Capza1	ENSMUSG00000070372	YKL007W		ortholog_one2many	31.8182	33.9552	NA	NA	1	w.orthology	nontarget
Capza2	ENSMUSG00000015733	YKL007W		ortholog_one2many	32.1678	34.3284	NA	NA	1	w.orthology	DAZL.target
Capzb	ENSMUSG00000028745	YIL034C		ortholog_one2one	43.5216	45.6446	NA	NA	1	w.orthology	nontarget
Car10	ENSMUSG00000056158				NA	NA	NA	NA	NA	wo.orthology	nontarget
Car11	ENSMUSG00000003273				NA	NA	NA	NA	NA	wo.orthology	nontarget
Car12	ENSMUSG00000032373				NA	NA	NA	NA	NA	wo.orthology	nontarget
[truncated: 13,785 more rows]
