# Supplementary material for: DAZL mediates a broad translational program regulating expansion and differentiation of spermatogonial progenitors
Source: eLife journal article supplement (doi:10.7554/elife.56523), 2020-07-20
Supplement: supp [file elife-56523-supp-v1.zip › elife_poa_e56523_Figure_3_source_data_4.xlsx]

## Sheet: Description
Figure 3 - source data 4
Tab Name	Description
Mouse human dN over dS	1:1 mouse:human orthologs with their dN, dS, and dN/dS
Mouse human orthologs	1:1 mouse:human ortholog data downloaded from Ensembl 98, filtered for the most robustly highly expressed isoform per expressed gene in undifferentiated spermatogonia

## Sheet: Mouse human dN over dS
Gene.stable.ID	Gene.name	Human.gene.name	dN.with.Human	dS.with.Human	Human.homology.type	dN.over.dS
ENSMUSG00000030663	1110004F10Rik	C11orf58	0.0203	0.8821	ortholog_one2one	0.0230133
ENSMUSG00000052794	1700030K09Rik	C19orf44	0.378	0.942	ortholog_one2one	0.401274
ENSMUSG00000038323	1700066M21Rik	C2orf69	0.1233	0.4554	ortholog_one2one	0.270751
ENSMUSG00000022507	1810013L24Rik	C16orf72	0.0069	0.0932	ortholog_one2one	0.0740343
ENSMUSG00000026090	2010300C02Rik	KIAA1211L	0.2163	0.9657	ortholog_one2one	0.223983
ENSMUSG00000040177	2310057M21Rik	C10orf88	0.1724	0.5359	ortholog_one2one	0.321702
ENSMUSG00000044496	2510039O18Rik	KIAA2013	0.039	0.889	ortholog_one2one	0.0438695
ENSMUSG00000052419	2610001J05Rik	SMIM30	0.0675	0.6651	ortholog_one2one	0.101488
ENSMUSG00000059482	2610301B20Rik	C8orf37	0.1107	0.3336	ortholog_one2one	0.331835
ENSMUSG00000062822	4833420G17Rik	C5orf34	0.1422	0.6025	ortholog_one2one	0.236017
ENSMUSG00000025871	4833439L19Rik	KIAA1191	0.1113	0.3689	ortholog_one2one	0.301708
ENSMUSG00000021747	4930452B06Rik	C3orf67	0.156	0.6697	ortholog_one2one	0.23294
ENSMUSG00000027811	4930579G24Rik	C4orf46	0.099	0.4344	ortholog_one2one	0.227901
ENSMUSG00000066571	4931406P16Rik	KIAA0355	0.03	0.3479	ortholog_one2one	0.0862317
ENSMUSG00000014837	4931428F04Rik	KIAA0895L	0.087	0.598	ortholog_one2one	0.145485
ENSMUSG00000037270	4932438A13Rik	KIAA1109	0.0157	0.4516	ortholog_one2one	0.0347653
ENSMUSG00000036046	5031439G07Rik	KIAA0930	0.0484	0.8538	ortholog_one2one	0.0566877
ENSMUSG00000036275	9530068E07Rik	C5orf15	0.2728	1.2633	ortholog_one2one	0.215942
ENSMUSG00000046138	9930021J03Rik	KIAA2026	0.1084	0.3457	ortholog_one2one	0.313567
ENSMUSG00000006299	Aamp	AAMP	0.0066	0.5122	ortholog_one2one	0.0128856
ENSMUSG00000025894	Aasdhppt	AASDHPPT	0.042	0.578	ortholog_one2one	0.0726644
ENSMUSG00000015243	Abca1	ABCA1	0.0242	0.5052	ortholog_one2one	0.0479018
ENSMUSG00000022822	Abcc5	ABCC5	0.0272	0.4719	ortholog_one2one	0.0576393
ENSMUSG00000028127	Abcd3	ABCD3	0.023	0.4522	ortholog_one2one	0.0508625
ENSMUSG00000003346	Abhd17a	ABHD17A	0.0338	1.0093	ortholog_one2one	0.0334886
ENSMUSG00000038459	Abhd17c	ABHD17C	0.0134	0.5488	ortholog_one2one	0.0244169
ENSMUSG00000039202	Abhd2	ABHD2	0.0052	0.4768	ortholog_one2one	0.010906
ENSMUSG00000058835	Abi1	ABI1	0.0089	0.3252	ortholog_one2one	0.0273678
ENSMUSG00000026842	Abl1	ABL1	0.0581	0.6658	ortholog_one2one	0.0872634
ENSMUSG00000026596	Abl2	ABL2	0.0272	0.3294	ortholog_one2one	0.0825744
ENSMUSG00000035234	Abraxas1	ABRAXAS1	0.1755	0.7328	ortholog_one2one	0.239492
ENSMUSG00000062908	Acadm	ACADM	0.0634	0.923	ortholog_one2one	0.0686891
ENSMUSG00000026499	Acbd3	ACBD3	0.0554	0.4622	ortholog_one2one	0.119862
ENSMUSG00000020917	Acly	ACLY	0.0087	0.5337	ortholog_one2one	0.0163013
ENSMUSG00000028405	Aco1	ACO1	0.0349	0.5661	ortholog_one2one	0.0616499
ENSMUSG00000022477	Aco2	ACO2	0.0158	0.5347	ortholog_one2one	0.0295493
ENSMUSG00000018796	Acsl1	ACSL1	0.0807	0.4787	ortholog_one2one	0.168582
ENSMUSG00000032883	Acsl3	ACSL3	0.0363	0.4565	ortholog_one2one	0.0795181
ENSMUSG00000027605	Acss2	ACSS2	0.0336	0.3329	ortholog_one2one	0.100931
ENSMUSG00000029580	Actb	ACTB	0	0	ortholog_one2one	NA
ENSMUSG00000027671	Actl6a	ACTL6A	0.0055	0.6364	ortholog_one2one	0.00864236
ENSMUSG00000015143	Actn1	ACTN1	0.0039	0.5914	ortholog_one2one	0.00659452
ENSMUSG00000021076	Actr10	ACTR10	0.0228	0.3706	ortholog_one2one	0.0615219
ENSMUSG00000019948	Actr6	ACTR6	0.0068	0.6631	ortholog_one2one	0.0102549
ENSMUSG00000061393	Acvr2b	ACVR2B	0.0025	0.4888	ortholog_one2one	0.00511457
ENSMUSG00000027259	Adal	ADAL	0.0978	0.4533	ortholog_one2one	0.215751
ENSMUSG00000054693	Adam10	ADAM10	0.0181	0.4013	ortholog_one2one	0.0451034
ENSMUSG00000025026	Add3	ADD3	0.0394	0.5724	ortholog_one2one	0.068833
ENSMUSG00000029090	Adgra3	ADGRA3	0.0364	0.6814	ortholog_one2one	0.0534194
ENSMUSG00000031785	Adgrg1	ADGRG1	0.1146	1.0442	ortholog_one2one	0.109749
ENSMUSG00000020629	Adi1	ADI1	0.0821	0.7994	ortholog_one2one	0.102702
ENSMUSG00000030168	Adipor2	ADIPOR2	0.0391	0.3589	ortholog_one2one	0.108944
ENSMUSG00000039197	Adk	ADK	0.0464	0.3694	ortholog_one2one	0.125609
ENSMUSG00000051149	Adnp	ADNP	0.0267	0.414	ortholog_one2one	0.0644928
ENSMUSG00000057134	Ado	ADO	0.0597	0.9163	ortholog_one2one	0.0651533
ENSMUSG00000002844	Adprh	ADPRH	0.1043	0.6625	ortholog_one2one	0.157434
ENSMUSG00000015961	Adss	ADSS	0.0161	0.3408	ortholog_one2one	0.0472418
ENSMUSG00000030232	Aebp2	AEBP2	0.048	0.5475	ortholog_one2one	0.0876712
ENSMUSG00000068036	Afdn	AFDN	0.035	0.5177	ortholog_one2one	0.0676067
ENSMUSG00000037138	Aff3	AFF3	0.0578	0.558	ortholog_one2one	0.103584
ENSMUSG00000024527	Afg3l2	AFG3L2	0.0378	0.7208	ortholog_one2one	0.0524417
ENSMUSG00000031521	Aga	AGA	0.1042	0.4448	ortholog_one2one	0.234263
ENSMUSG00000026159	Agfg1	AGFG1	0.0174	0.2617	ortholog_one2one	0.0664883
ENSMUSG00000031467	Agpat5	AGPAT5	0.1094	0.3902	ortholog_one2one	0.280369
ENSMUSG00000042410	Agps	AGPS	0.0599	0.3847	ortholog_one2one	0.155706
ENSMUSG00000026491	Ahctf1	AHCTF1	0.18	0.5926	ortholog_one2one	0.303746
ENSMUSG00000027893	Ahcyl1	AHCYL1	0	0	ortholog_one2one	NA
ENSMUSG00000037692	Ahdc1	AHDC1	0.0232	0.5522	ortholog_one2one	0.0420138
ENSMUSG00000019986	Ahi1	AHI1	0.1229	0.7164	ortholog_one2one	0.171552
ENSMUSG00000010290	AI597479	C2orf49	0.0763	0.5035	ortholog_one2one	0.151539
ENSMUSG00000019806	Aig1	AIG1	0.0643	0.5511	ortholog_one2one	0.116676
ENSMUSG00000022178	Ajuba	AJUBA	0.032	0.507	ortholog_one2one	0.0631164
ENSMUSG00000028792	Ak2	AK2	0.0257	0.5822	ortholog_one2one	0.0441429
ENSMUSG00000028527	Ak4	AK4	0.0492	0.4573	ortholog_one2one	0.107588
ENSMUSG00000022016	Akap11	AKAP11	0.15	0.4915	ortholog_one2one	0.305188
ENSMUSG00000066406	Akap13	AKAP13	0.1608	0.5013	ortholog_one2one	0.320766
ENSMUSG00000024045	Akap8	AKAP8	0.115	0.6687	ortholog_one2one	0.171975
ENSMUSG00000023075	Akirin1	AKIRIN1	0.0397	0.3373	ortholog_one2one	0.117699
ENSMUSG00000028291	Akirin2	AKIRIN2	0.0295	0.2843	ortholog_one2one	0.103764
ENSMUSG00000019699	Akt3	AKT3	0.0019	0.2801	ortholog_one2one	0.00678329
ENSMUSG00000013584	Aldh1a2	ALDH1A2	0.0139	0.4368	ortholog_one2one	0.0318223
ENSMUSG00000010025	Aldh3a2	ALDH3A2	0.0869	0.6095	ortholog_one2one	0.142576
ENSMUSG00000053644	Aldh7a1	ALDH7A1	0.0681	0.5174	ortholog_one2one	0.13162
ENSMUSG00000039740	Alg2	ALG2	0.12	0.5651	ortholog_one2one	0.212352
ENSMUSG00000079036	Alkbh1	ALKBH1	0.0972	0.467	ortholog_one2one	0.208137
ENSMUSG00000042650	Alkbh5	ALKBH5	0.0126	0.6009	ortholog_one2one	0.0209685
ENSMUSG00000026024	Als2	ALS2	0.0415	0.4975	ortholog_one2one	0.0834171
ENSMUSG00000031751	Amfr	AMFR	0.0277	0.4764	ortholog_one2one	0.0581444
ENSMUSG00000041915	Ammecr1l	AMMECR1L	0.0078	0.2056	ortholog_one2one	0.0379377
ENSMUSG00000041688	Amot	AMOT	0.0606	0.4068	ortholog_one2one	0.148968
ENSMUSG00000032531	Amotl2	AMOTL2	0.0539	0.7017	ortholog_one2one	0.0768135
ENSMUSG00000027889	Ampd2	AMPD2	0.0135	0.6143	ortholog_one2one	0.0219762
ENSMUSG00000014355	Anapc1	ANAPC1	0.0396	0.4679	ortholog_one2one	0.0846335
ENSMUSG00000036977	Anapc10	AC098588.2	0.0555	0.4779	ortholog_one2one	0.116133
ENSMUSG00000021257	Angel1	ANGEL1	0.0492	0.3255	ortholog_one2one	0.151152
ENSMUSG00000026634	Angel2	ANGEL2	0.0801	0.5205	ortholog_one2one	0.15389
ENSMUSG00000022265	Ank	ANKH	0.0075	0.6052	ortholog_one2one	0.0123926
ENSMUSG00000020790	Ankfy1	ANKFY1	0.029	0.5263	ortholog_one2one	0.0551017
ENSMUSG00000031508	Ankrd10	ANKRD10	0.1208	0.4603	ortholog_one2one	0.262438
ENSMUSG00000034647	Ankrd12	ANKRD12	0.0953	0.6667	ortholog_one2one	0.142943
ENSMUSG00000039988	Ankrd13c	ANKRD13C	0.0414	0.4199	ortholog_one2one	0.0985949
ENSMUSG00000055204	Ankrd17	ANKRD17	0.0154	0.2505	ortholog_one2one	0.061477
ENSMUSG00000057766	Ankrd29	ANKRD29	0.0218	0.4	ortholog_one2one	0.0545
ENSMUSG00000048307	Ankrd46	ANKRD46	0.0591	0.7201	ortholog_one2one	0.0820719
ENSMUSG00000036777	Anln	ANLN	0.1178	0.5395	ortholog_one2one	0.21835
ENSMUSG00000015749	Anp32e	ANP32E	0.0267	0.6895	ortholog_one2one	0.0387237
ENSMUSG00000021814	Anxa7	ANXA7	0.0394	0.4984	ortholog_one2one	0.079053
ENSMUSG00000074238	Ap1ar	AP1AR	0.0426	0.899	ortholog_one2one	0.047386
ENSMUSG00000031731	Ap1g1	AP1G1	0.0035	0.2562	ortholog_one2one	0.0136612
ENSMUSG00000060279	Ap2a1	AP2A1	0.0062	0.7345	ortholog_one2one	0.00844112
ENSMUSG00000063801	Ap3s2	AP3S2	0	0	ortholog_one2one	NA
ENSMUSG00000030519	Apba2	APBA2	0.0405	0.8445	ortholog_one2one	0.0479574
ENSMUSG00000026786	Apbb1ip	APBB1IP	0.1244	0.5732	ortholog_one2one	0.217027
ENSMUSG00000005871	Apc	APC	0.0467	0.525	ortholog_one2one	0.0889524
ENSMUSG00000035960	Apex1	APEX1	0.027	0.6427	ortholog_one2one	0.0420103
ENSMUSG00000027193	Api5	API5	0.0147	0.4601	ortholog_one2one	0.0319496
ENSMUSG00000031996	Aplp2	APLP2	0.0343	0.4087	ortholog_one2one	0.0839246
ENSMUSG00000018481	Appbp2	APPBP2	0.004	0.4021	ortholog_one2one	0.00994777
ENSMUSG00000040760	Appl1	APPL1	0.0078	0.3564	ortholog_one2one	0.0218855
ENSMUSG00000040383	Aqr	AQR	0.0295	0.6224	ortholog_one2one	0.0473972
ENSMUSG00000001127	Araf	ARAF	0.0229	0.4645	ortholog_one2one	0.0493003
ENSMUSG00000032096	Arcn1	ARCN1	0.0046	0.33	ortholog_one2one	0.0139394
ENSMUSG00000048076	Arf1	ARF1	0	0	ortholog_one2one	NA
ENSMUSG00000021877	Arf4	ARF4	0.0186	0.2821	ortholog_one2one	0.0659341
ENSMUSG00000044147	Arf6	ARF6	0	0	ortholog_one2one	NA
ENSMUSG00000054277	Arfgap3	ARFGAP3	0.1018	0.8995	ortholog_one2one	0.113174
ENSMUSG00000067851	Arfgef1	ARFGEF1	0.0125	0.3656	ortholog_one2one	0.0341904
ENSMUSG00000040459	Arglu1	ARGLU1	0.0081	0.3115	ortholog_one2one	0.0260032
ENSMUSG00000027247	Arhgap1	ARHGAP1	0.0176	0.6471	ortholog_one2one	0.0271983
ENSMUSG00000030766	Arhgap17	ARHGAP17	0.0747	0.6685	ortholog_one2one	0.111743
ENSMUSG00000039831	Arhgap29	ARHGAP29	0.0937	0.5053	ortholog_one2one	0.185434
ENSMUSG00000041444	Arhgap32	ARHGAP32	0.0662	0.4601	ortholog_one2one	0.143882
ENSMUSG00000033389	Arhgap44	ARHGAP44	0.0337	0.539	ortholog_one2one	0.0625232
ENSMUSG00000035133	Arhgap5	ARHGAP5	0.0122	0.3117	ortholog_one2one	0.0391402
ENSMUSG00000040940	Arhgef1	ARHGEF1	0.0624	0.6286	ortholog_one2one	0.0992682
ENSMUSG00000041977	Arhgef11	ARHGEF11	0.0765	0.4342	ortholog_one2one	0.176186
ENSMUSG00000028059	Arhgef2	ARHGEF2	0.06	0.6504	ortholog_one2one	0.0922509
ENSMUSG00000021895	Arhgef3	ARHGEF3	0.039	0.5813	ortholog_one2one	0.067091
ENSMUSG00000031511	Arhgef7	ARHGEF7	0.0354	0.6743	ortholog_one2one	0.0524989
ENSMUSG00000007880	Arid1a	ARID1A	0.0166	0.2337	ortholog_one2one	0.0710312
ENSMUSG00000039219	Arid4b	ARID4B	0.0489	0.4457	ortholog_one2one	0.109715
ENSMUSG00000025234	Arih1	ARIH1	0.0023	0.2272	ortholog_one2one	0.0101232
ENSMUSG00000064145	Arih2	ARIH2	0.0083	0.4407	ortholog_one2one	0.0188337
ENSMUSG00000073568	Arl14epl	ARL14EPL	NA	NA	ortholog_one2one	NA
ENSMUSG00000031776	Arl2bp	ARL2BP	0.0245	0.5083	ortholog_one2one	0.0481999
ENSMUSG00000036093	Arl5a	ARL5A	0.0051	0.495	ortholog_one2one	0.010303
ENSMUSG00000017418	Arl5b	ARL5B	0	0	ortholog_one2one	NA
ENSMUSG00000030654	Arl6ip1	ARL6IP1	0.0172	0.3249	ortholog_one2one	0.0529394
ENSMUSG00000026960	Arl6ip6	ARL6IP6	0.1062	0.4801	ortholog_one2one	0.221204
ENSMUSG00000026426	Arl8a	ARL8A	0.0023	0.5373	ortholog_one2one	0.00428066
ENSMUSG00000032468	Armc8	ARMC8	0.0056	0.2874	ortholog_one2one	0.019485
ENSMUSG00000033436	Armcx2	ARMCX2	0.1401	0.5306	ortholog_one2one	0.264041
ENSMUSG00000055116	Arntl	ARNTL	0.0075	0.3904	ortholog_one2one	0.0192111
ENSMUSG00000006304	Arpc2	ARPC2	0.003	0.2663	ortholog_one2one	0.0112655
ENSMUSG00000029465	Arpc3	ARPC3	0.0101	0.9884	ortholog_one2one	0.0102185
ENSMUSG00000008475	Arpc5	ARPC5	0.003	0.4206	ortholog_one2one	0.00713267
ENSMUSG00000026755	Arpc5l	ARPC5L	0.0152	0.3442	ortholog_one2one	0.0441604
ENSMUSG00000074794	Arrdc3	ARRDC3	0.0102	0.2993	ortholog_one2one	0.0340795
ENSMUSG00000042659	Arrdc4	ARRDC4	0.0756	0.6795	ortholog_one2one	0.111258
ENSMUSG00000031591	Asah1	ASAH1	0.1299	0.5214	ortholog_one2one	0.249137
ENSMUSG00000020305	Asb3	ASB3	0.0916	0.3833	ortholog_one2one	0.238977
ENSMUSG00000048175	Asb8	ASB8	0.0133	0.4294	ortholog_one2one	0.0309735
ENSMUSG00000038774	Ascc3	ASCC3	0.0392	0.472	ortholog_one2one	0.0830508
ENSMUSG00000019857	Asf1a	ASF1A	0.0022	0.253	ortholog_one2one	0.00869565
ENSMUSG00000010796	Asz1	ASZ1	0.0772	0.517	ortholog_one2one	0.149323
ENSMUSG00000013662	Atad1	ATAD1	0	0	ortholog_one2one	NA
ENSMUSG00000023027	Atf1	ATF1	0.0418	0.5503	ortholog_one2one	0.0759586
ENSMUSG00000027104	Atf2	ATF2	0.0039	0.232	ortholog_one2one	0.0168103
ENSMUSG00000039200	Atf7ip2	ATF7IP2	0.2214	0.4512	ortholog_one2one	0.490691
ENSMUSG00000037204	Atg101	ATG101	0.0057	0.7658	ortholog_one2one	0.0074432
ENSMUSG00000037526	Atg14	ATG14	0.0322	0.6222	ortholog_one2one	0.0517518
ENSMUSG00000038160	Atg5	ATG5	0.0152	0.35	ortholog_one2one	0.0434286
ENSMUSG00000026192	Atic	ATIC	0.0476	0.6118	ortholog_one2one	0.0778032
ENSMUSG00000021066	Atl1	ATL1	0.0166	0.4124	ortholog_one2one	0.0402522
ENSMUSG00000034218	Atm	ATM	0.088	0.4929	ortholog_one2one	0.178535
ENSMUSG00000037400	Atp11b	ATP11B	0.0311	0.3682	ortholog_one2one	0.084465
ENSMUSG00000062949	Atp11c	ATP11C	0.0308	0.3716	ortholog_one2one	0.0828848
ENSMUSG00000029467	Atp2a2	ATP2A2	0.0055	0.452	ortholog_one2one	0.0121681
ENSMUSG00000019943	Atp2b1	ATP2B1	0.0023	0.4709	ortholog_one2one	0.00488426
ENSMUSG00000026463	Atp2b4	ATP2B4	0.0892	0.55	ortholog_one2one	0.162182
ENSMUSG00000025393	Atp5b	ATP5F1B	0.0195	0.4505	ortholog_one2one	0.0432852
ENSMUSG00000018770	Atp5g3	ATP5MC3	0.0212	0.093	ortholog_one2one	0.227957
ENSMUSG00000019087	Atp6ap1	ATP6AP1	0.0777	0.6008	ortholog_one2one	0.129328
ENSMUSG00000031007	Atp6ap2	ATP6AP2	0.0313	0.3921	ortholog_one2one	0.0798266
ENSMUSG00000052459	Atp6v1a	ATP6V1A	0.0099	0.5239	ortholog_one2one	0.0188967
ENSMUSG00000006273	Atp6v1b2	ATP6V1B2	0.0057	0.5038	ortholog_one2one	0.011314
ENSMUSG00000004285	Atp6v1f	ATP6V1F	0.0073	0.5581	ortholog_one2one	0.0130801
ENSMUSG00000039105	Atp6v1g1	ATP6V1G1	0.0275	0.4272	ortholog_one2one	0.0643727
ENSMUSG00000033793	Atp6v1h	ATP6V1H	0.0065	0.4974	ortholog_one2one	0.013068
ENSMUSG00000033792	Atp7a	ATP7A	0.054	0.4114	ortholog_one2one	0.131259
ENSMUSG00000031229	Atrx	ATRX	0.0803	0.4799	ortholog_one2one	0.167327
ENSMUSG00000032637	Atxn2l	ATXN2L	0.0381	0.4004	ortholog_one2one	0.0951548
ENSMUSG00000074748	Atxn7l3b	ATXN7L3B	0.038	0.4613	ortholog_one2one	0.0823759
ENSMUSG00000029787	Avl9	AVL9	0.0448	0.3501	ortholog_one2one	0.127963
ENSMUSG00000000142	Axin2	AXIN2	0.0491	0.6406	ortholog_one2one	0.0766469
ENSMUSG00000037458	Azin1	AZIN1	0.0197	0.2479	ortholog_one2one	0.0794675
ENSMUSG00000060802	B2m	B2M	0.7223	64.957	ortholog_one2one	0.0111197
ENSMUSG00000026156	B3gat2	B3GAT2	0.0472	0.4731	ortholog_one2one	0.0997675
ENSMUSG00000022686	B3gnt5	B3GNT5	0.1193	0.4865	ortholog_one2one	0.245221
ENSMUSG00000028413	B4galt1	B4GALT1	0.0739	0.4416	ortholog_one2one	0.167346
ENSMUSG00000017929	B4galt5	B4GALT5	0.0231	0.6349	ortholog_one2one	0.0363837
ENSMUSG00000037316	Bag4	BAG4	0.0831	0.4919	ortholog_one2one	0.168937
ENSMUSG00000040007	Bahd1	BAHD1	0.0488	0.4759	ortholog_one2one	0.102543
ENSMUSG00000024844	Banf1	BANF1	0.0161	0.2667	ortholog_one2one	0.0603675
ENSMUSG00000002748	Baz1b	BAZ1B	0.0427	0.5675	ortholog_one2one	0.0752423
ENSMUSG00000040054	Baz2a	BAZ2A	0.0865	0.4006	ortholog_one2one	0.215926
ENSMUSG00000026987	Baz2b	BAZ2B	0.0584	0.5302	ortholog_one2one	0.110147
ENSMUSG00000019132	BC005537	C6orf62	0	0	ortholog_one2one	NA
ENSMUSG00000053684	BC048403	C12orf66	0.0258	0.5423	ortholog_one2one	0.0475751
ENSMUSG00000020650	Bcap29	BCAP29	0.119	0.666	ortholog_one2one	0.178679
ENSMUSG00000002015	Bcap31	BCAP31	0.0515	0.3874	ortholog_one2one	0.132938
ENSMUSG00000005687	Bcas2	BCAS2	0	0	ortholog_one2one	NA
ENSMUSG00000028191	Bcl10	BCL10	0.0442	0.7906	ortholog_one2one	0.0559069
ENSMUSG00000000317	Bcl6b	BCL6B	0.0458	0.5036	ortholog_one2one	0.0909452
ENSMUSG00000029438	Bcl7a	BCL7A	0.0257	0.5424	ortholog_one2one	0.047382
ENSMUSG00000037608	Bclaf1	BCLAF1	0.0167	0.3596	ortholog_one2one	0.0464405
ENSMUSG00000040363	Bcor	BCOR	0.056	0.3958	ortholog_one2one	0.141486
ENSMUSG00000036959	Bcorl1	BCORL1	0.0471	0.3802	ortholog_one2one	0.123882
ENSMUSG00000009681	Bcr	BCR	0.026	0.7067	ortholog_one2one	0.0367907
ENSMUSG00000049658	Bdp1	BDP1	0.3193	0.5865	ortholog_one2one	0.544416
ENSMUSG00000035086	Becn1	BECN1	0.007	0.4193	ortholog_one2one	0.0166945
ENSMUSG00000092060	Bend4	BEND4	0.0477	0.4957	ortholog_one2one	0.0962276
ENSMUSG00000030256	Bhlhe41	BHLHE41	0.1014	0.6359	ortholog_one2one	0.159459
ENSMUSG00000014329	Bicc1	BICC1	0.0365	0.6119	ortholog_one2one	0.0596503
ENSMUSG00000037933	Bicd2	BICD2	0.0192	0.8917	ortholog_one2one	0.0215319
ENSMUSG00000024073	Birc6	BIRC6	0.0217	0.4676	ortholog_one2one	0.0464072
ENSMUSG00000067787	Blcap	BLCAP	0	0	ortholog_one2one	NA
ENSMUSG00000030528	Blm	BLM	0.1311	0.4956	ortholog_one2one	0.264528
ENSMUSG00000005804	Bloc1s6	BLOC1S6	0.1785	1.6889	ortholog_one2one	0.10569
ENSMUSG00000039004	Bmp6	BMP6	0.0428	0.5863	ortholog_one2one	0.0730002
ENSMUSG00000021796	Bmpr1a	BMPR1A	0.0097	0.4169	ortholog_one2one	0.023267
ENSMUSG00000025105	Bnc1	BNC1	0.0687	0.452	ortholog_one2one	0.151991
ENSMUSG00000028487	Bnc2	BNC2	0.0135	0.3957	ortholog_one2one	0.0341168
ENSMUSG00000078566	Bnip3	BNIP3	0.0268	0.4106	ortholog_one2one	0.0652703
ENSMUSG00000022051	Bnip3l	BNIP3L	0.0171	0.4091	ortholog_one2one	0.0417991
ENSMUSG00000002413	Braf	BRAF	0.0135	0.2879	ortholog_one2one	0.0468913
ENSMUSG00000000148	Brat1	BRAT1	0.1733	0.8618	ortholog_one2one	0.201091
ENSMUSG00000022387	Brd1	BRD1	0.023	0.4997	ortholog_one2one	0.0460276
ENSMUSG00000024335	Brd2	BRD2	0.0207	0.4545	ortholog_one2one	0.0455446
ENSMUSG00000026918	Brd3	BRD3	0.0204	0.6675	ortholog_one2one	0.0305618
ENSMUSG00000024002	Brd4	BRD4	0.0218	0.4976	ortholog_one2one	0.0438103
ENSMUSG00000031660	Brd7	BRD7	0.064	0.4379	ortholog_one2one	0.146152
ENSMUSG00000029279	Brdt	BRDT	0.1696	0.9662	ortholog_one2one	0.175533
ENSMUSG00000033940	Brk1	BRK1	0.0055	0.3233	ortholog_one2one	0.0170121
ENSMUSG00000053046	Brsk2	BRSK2	0.0288	0.9253	ortholog_one2one	0.031125
ENSMUSG00000022914	Brwd1	BRWD1	0.1124	0.6906	ortholog_one2one	0.162757
ENSMUSG00000040565	Btaf1	BTAF1	0.0176	0.3768	ortholog_one2one	0.0467091
ENSMUSG00000038187	Btbd10	BTBD10	0.0433	0.4327	ortholog_one2one	0.100069
ENSMUSG00000062098	Btbd3	BTBD3	0.0142	0.4375	ortholog_one2one	0.0324571
ENSMUSG00000041702	Btbd7	BTBD7	0.0312	0.3249	ortholog_one2one	0.0960295
ENSMUSG00000066979	Bub3	BUB3	0.0014	0.5538	ortholog_one2one	0.00252799
ENSMUSG00000051223	Bzw1	BZW1	0	0	ortholog_one2one	NA
ENSMUSG00000000581	C1d	C1D	0.0498	0.6535	ortholog_one2one	0.076205
ENSMUSG00000036707	Cab39	CAB39	0.0042	0.3292	ortholog_one2one	0.0127582
ENSMUSG00000021981	Cab39l	CAB39L	0.0067	0.4937	ortholog_one2one	0.013571
ENSMUSG00000038990	Cables2	CABLES2	0.0452	0.8085	ortholog_one2one	0.055906
ENSMUSG00000015488	Cacfd1	CACFD1	0.1577	1.2584	ortholog_one2one	0.125318
ENSMUSG00000033417	Cacul1	CACUL1	0.0323	0.3781	ortholog_one2one	0.0854271
ENSMUSG00000014226	Cacybp	CACYBP	0.0305	0.4899	ortholog_one2one	0.0622576
ENSMUSG00000013629	Cad	CAD	0.0236	0.4949	ortholog_one2one	0.0476864
ENSMUSG00000032076	Cadm1	CADM1	0.007	0.2864	ortholog_one2one	0.0244413
ENSMUSG00000001175	Calm1	CALM1	0.0124	0.4268	ortholog_one2one	0.0290534
ENSMUSG00000036438	Calm2	CALM2	0	0	ortholog_one2one	NA
ENSMUSG00000019370	Calm3	CALM3	0	0	ortholog_one2one	NA
ENSMUSG00000003814	Calr	CALR	0.0285	0.8944	ortholog_one2one	0.0318649
ENSMUSG00000029767	Calu	CALU	0.0517	0.6394	ortholog_one2one	0.0808571
ENSMUSG00000021820	Camk2g	CAMK2G	0.0009	0.2708	ortholog_one2one	0.00332349
ENSMUSG00000029471	Camkk2	CAMKK2	0.0388	0.5861	ortholog_one2one	0.0662003
ENSMUSG00000026933	Camsap1	CAMSAP1	0.0787	0.7779	ortholog_one2one	0.10117
ENSMUSG00000020114	Cand1	CAND1	0.0027	0.5551	ortholog_one2one	0.00486399
ENSMUSG00000030319	Cand2	CAND2	0.0472	0.81	ortholog_one2one	0.0582716
ENSMUSG00000020368	Canx	CANX	0.0309	0.5044	ortholog_one2one	0.0612609
ENSMUSG00000021893	Capn7	CAPN7	0.024	0.4597	ortholog_one2one	0.052208
ENSMUSG00000027184	Caprin1	CAPRIN1	0.014	0.3442	ortholog_one2one	0.040674
ENSMUSG00000015733	Capza2	CAPZA2	0.0078	0.2941	ortholog_one2one	0.0265216
ENSMUSG00000078676	Casc3	CASC3	0.0518	0.3965	ortholog_one2one	0.130643
ENSMUSG00000060227	Casc4	CASC4	0.0497	0.2668	ortholog_one2one	0.186282
ENSMUSG00000029863	Casp2	CASP2	0.0613	0.4893	ortholog_one2one	0.125281
ENSMUSG00000025076	Casp7	CASP7	0.1694	0.9133	ortholog_one2one	0.185481
ENSMUSG00000028914	Casp9	CASP9	0.1345	0.567	ortholog_one2one	0.237213
ENSMUSG00000031885	Cbfb	CBFB	0.005	0.2476	ortholog_one2one	0.0201939
ENSMUSG00000034342	Cbl	CBL	0.0396	0.4458	ortholog_one2one	0.0888291
ENSMUSG00000022637	Cblb	CBLB	0.0202	0.5556	ortholog_one2one	0.0363571
ENSMUSG00000020659	Cbll1	CBLL1	0.0126	0.2435	ortholog_one2one	0.0517454
ENSMUSG00000025577	Cbx2	CBX2	0.0842	1.0393	ortholog_one2one	0.0810161
ENSMUSG00000025578	Cbx8	CBX8	0.036	0.6895	ortholog_one2one	0.0522117
ENSMUSG00000020074	Ccar1	CCAR1	0.0219	0.4087	ortholog_one2one	0.0535845
ENSMUSG00000071855	Ccdc112	CCDC112	0.0764	0.7831	ortholog_one2one	0.097561
ENSMUSG00000020482	Ccdc117	CCDC117	0.1322	0.4728	ortholog_one2one	0.279611
ENSMUSG00000019659	Ccdc12	CCDC12	0.035	0.6017	ortholog_one2one	0.0581685
ENSMUSG00000021578	Ccdc127	CCDC127	0.0951	0.8238	ortholog_one2one	0.115441
ENSMUSG00000038010	Ccdc138	CCDC138	0.1226	0.5906	ortholog_one2one	0.207586
ENSMUSG00000021086	Ccdc175	CCDC175	0.4526	0.8556	ortholog_one2one	0.528986
ENSMUSG00000022035	Ccdc25	CCDC25	0.0193	0.3879	ortholog_one2one	0.0497551
ENSMUSG00000020925	Ccdc43	CCDC43	0.0621	0.5761	ortholog_one2one	0.107794
ENSMUSG00000048701	Ccdc6	CCDC6	0.0169	0.7213	ortholog_one2one	0.0234299
ENSMUSG00000090946	Ccdc71l	CCDC71L	0.1357	0.584	ortholog_one2one	0.232363
ENSMUSG00000045106	Ccdc73	CCDC73	0.2824	0.5353	ortholog_one2one	0.527555
ENSMUSG00000028252	Ccnc	CCNC	0.0032	0.2616	ortholog_one2one	0.0122324
ENSMUSG00000070348	Ccnd1	CCND1	0.0274	0.8284	ortholog_one2one	0.0330758
ENSMUSG00000020326	Ccng1	CCNG1	0.04	0.3464	ortholog_one2one	0.115473
ENSMUSG00000063015	Ccni	CCNI	0.0308	0.1966	ortholog_one2one	0.156663
ENSMUSG00000044707	Ccnjl	CCNJL	0.0492	0.6574	ortholog_one2one	0.0748403
ENSMUSG00000021258	Ccnk	CCNK	0.0196	0.3985	ortholog_one2one	0.0491844
ENSMUSG00000027829	Ccnl1	CCNL1	0.0105	0.2982	ortholog_one2one	0.0352113
ENSMUSG00000029068	Ccnl2	CCNL2	0.0518	0.6635	ortholog_one2one	0.0780708
ENSMUSG00000024286	Ccny	CCNY	0.0094	0.3884	ortholog_one2one	0.0242019
ENSMUSG00000033904	Ccp110	CCP110	0.161	0.5527	ortholog_one2one	0.291297
ENSMUSG00000034563	Ccpg1	CCPG1	0.1858	0.762	ortholog_one2one	0.243832
ENSMUSG00000001416	Cct3	CCT3	0.0137	0.4951	ortholog_one2one	0.0276712
ENSMUSG00000007739	Cct4	CCT4	0.0158	0.3979	ortholog_one2one	0.0397085
ENSMUSG00000029447	Cct6a	CCT6A	0.0656	0.6348	ortholog_one2one	0.10334
ENSMUSG00000030007	Cct7	CCT7	0.0212	0.4769	ortholog_one2one	0.0444538
ENSMUSG00000025613	Cct8	CCT8	0.0181	0.61	ortholog_one2one	0.0296721
ENSMUSG00000019818	Cd164	CD164	0.2749	0.4123	ortholog_one2one	0.666748
ENSMUSG00000030342	Cd9	CD9	0.0626	0.7542	ortholog_one2one	0.0830019
ENSMUSG00000006398	Cdc20	CDC20	0.0269	0.5177	ortholog_one2one	0.0519606
ENSMUSG00000024370	Cdc23	CDC23	0.0239	0.4988	ortholog_one2one	0.047915
ENSMUSG00000032477	Cdc25a	CDC25A	0.0821	0.4432	ortholog_one2one	0.185244
ENSMUSG00000020687	Cdc27	CDC27	0.0132	0.3058	ortholog_one2one	0.0431655
ENSMUSG00000024780	Cdc37l1	CDC37L1	0.0547	0.3945	ortholog_one2one	0.138657
ENSMUSG00000038446	Cdc40	CDC40	0.0056	0.3901	ortholog_one2one	0.0143553
ENSMUSG00000006699	Cdc42	CDC42	0	0	ortholog_one2one	NA
ENSMUSG00000021279	Cdc42bpb	CDC42BPB	0.0401	0.7712	ortholog_one2one	0.0519969
ENSMUSG00000041598	Cdc42ep4	CDC42EP4	0.1135	1.0146	ortholog_one2one	0.111867
ENSMUSG00000052298	Cdc42se2	CDC42SE2	0	0	ortholog_one2one	NA
ENSMUSG00000029283	Cdc7	CDC7	0.1149	0.5111	ortholog_one2one	0.224809
ENSMUSG00000026361	Cdc73	CDC73	0	0	ortholog_one2one	NA
ENSMUSG00000047832	Cdca4	CDCA4	NA	NA	ortholog_one2one	NA
ENSMUSG00000055612	Cdca7	CDCA7	0.0837	0.6492	ortholog_one2one	0.128928
ENSMUSG00000021175	Cdca7l	CDCA7L	0.1282	0.7319	ortholog_one2one	0.175161
ENSMUSG00000028873	Cdca8	CDCA8	0.1343	0.5973	ortholog_one2one	0.224845
ENSMUSG00000041297	Cdk13	CDK13	0.0221	0.2461	ortholog_one2one	0.0898009
ENSMUSG00000020015	Cdk17	CDK17	0.0063	0.4341	ortholog_one2one	0.0145128
ENSMUSG00000025358	Cdk2	CDK2	0.005	0.2929	ortholog_one2one	0.0170707
ENSMUSG00000040274	Cdk6	CDK6	0.0193	0.4144	ortholog_one2one	0.0465734
ENSMUSG00000029635	Cdk8	CDK8	0.0194	0.3103	ortholog_one2one	0.0625201
ENSMUSG00000009555	Cdk9	CDK9	0.0057	0.969	ortholog_one2one	0.00588235
ENSMUSG00000003031	Cdkn1b	CDKN1B	0.0535	0.5142	ortholog_one2one	0.104045
ENSMUSG00000020392	Cdkn2aipnl	CDKN2AIPNL	0.0193	0.7104	ortholog_one2one	0.0271678
ENSMUSG00000038119	Cdon	CDON	0.1039	0.5727	ortholog_one2one	0.181421
ENSMUSG00000058793	Cds2	CDS2	0.0211	0.5704	ortholog_one2one	0.0369916
ENSMUSG00000006585	Cdt1	CDT1	0.1798	1.5532	ortholog_one2one	0.115761
ENSMUSG00000059288	Cdyl	CDYL	0.0443	0.6913	ortholog_one2one	0.0640822
ENSMUSG00000056501	Cebpb	CEBPB	0.1043	0.7734	ortholog_one2one	0.134859
ENSMUSG00000071226	Cecr2	CECR2	0.1148	0.511	ortholog_one2one	0.224658
ENSMUSG00000005506	Celf1	CELF1	0.0018	0.2572	ortholog_one2one	0.00699844
ENSMUSG00000002107	Celf2	CELF2	0.0355	0.2636	ortholog_one2one	0.134674
ENSMUSG00000029177	Cenpa	CENPA	0.1939	1.1931	ortholog_one2one	0.162518
ENSMUSG00000026605	Cenpf	CENPF	0.2213	0.6072	ortholog_one2one	0.36446
ENSMUSG00000023919	Cenpq	CENPQ	0.2401	0.63	ortholog_one2one	0.381111
ENSMUSG00000057335	Cep170	CEP170	0.0511	0.4548	ortholog_one2one	0.112357
ENSMUSG00000024989	Cep55	CEP55	0.154	0.608	ortholog_one2one	0.253289
ENSMUSG00000021572	Cep72	CEP72	0.2514	0.871	ortholog_one2one	0.288634
ENSMUSG00000037443	Cep85	CEP85	0.0822	0.411	ortholog_one2one	0.2
ENSMUSG00000015714	Cers2	CERS2	0.0364	0.329	ortholog_one2one	0.110638
ENSMUSG00000027035	Cers6	CERS6	0.022	0.3861	ortholog_one2one	0.0569801
ENSMUSG00000031347	Cetn2	CETN2	0.0179	0.4917	ortholog_one2one	0.0364043
ENSMUSG00000021537	Cetn3	CETN3	0.0079	0.8103	ortholog_one2one	0.00974948
ENSMUSG00000031954	Cfdp1	CFDP1	0.0899	0.5773	ortholog_one2one	0.155725
ENSMUSG00000062929	Cfl2	CFL2	0.0027	0.2026	ortholog_one2one	0.0133268
ENSMUSG00000047710	Champ1	CHAMP1	0.1407	0.6534	ortholog_one2one	0.215335
ENSMUSG00000070493	Chchd2	CHCHD2	0.101	0.5433	ortholog_one2one	0.185901
ENSMUSG00000057133	Chd6	CHD6	0.0579	0.4211	ortholog_one2one	0.137497
ENSMUSG00000041235	Chd7	CHD7	0.0234	0.4057	ortholog_one2one	0.0576781
ENSMUSG00000052488	Cherp	CHERP	0.024	1.2318	ortholog_one2one	0.0194837
ENSMUSG00000014668	Chfr	CHFR	0.0979	0.5824	ortholog_one2one	0.168098
ENSMUSG00000029229	Chic2	CHIC2	0.0027	0.1832	ortholog_one2one	0.014738
ENSMUSG00000078185	Chml	CHML	0.1166	0.5422	ortholog_one2one	0.21505
ENSMUSG00000000743	Chmp1a	CHMP1A	0.0106	0.7605	ortholog_one2one	0.0139382
ENSMUSG00000109901	Chmp1b	CHMP1B	0.0085	0.449	ortholog_one2one	0.018931
ENSMUSG00000038467	Chmp4b	CHMP4B	0.0019	0.5288	ortholog_one2one	0.00359304
ENSMUSG00000034190	Chmp7	CHMP7	0.0214	0.4407	ortholog_one2one	0.0485591
ENSMUSG00000056486	Chn1	CHN1	0.0172	0.3134	ortholog_one2one	0.0548819
ENSMUSG00000001774	Chordc1	CHORDC1	0.0206	0.4445	ortholog_one2one	0.0463442
ENSMUSG00000014077	Chp1	CHP1	0.0044	0.4285	ortholog_one2one	0.0102684
ENSMUSG00000032640	Chsy1	CHSY1	0.0255	0.7212	ortholog_one2one	0.0353577
ENSMUSG00000001017	Chtop	CHTOP	0.0041	0.085	ortholog_one2one	0.0482353
ENSMUSG00000025199	Chuk	CHUK	0.023	0.2853	ortholog_one2one	0.0806169
ENSMUSG00000003662	Ciao1	CIAO1	0.0251	0.5073	ortholog_one2one	0.0494776
ENSMUSG00000031781	Ciapin1	CIAPIN1	0.109	0.5875	ortholog_one2one	0.185532
ENSMUSG00000030538	Cib1	CIB1	0.0299	0.6222	ortholog_one2one	0.0480553
ENSMUSG00000045193	Cirbp	CIRBP	0.0288	0.6852	ortholog_one2one	0.0420315
ENSMUSG00000039910	Cited2	CITED2	0.018	0.3033	ortholog_one2one	0.0593472
ENSMUSG00000039205	Ciz1	CIZ1	0.201	0.6062	ortholog_one2one	0.331574
ENSMUSG00000037725	Ckap2	CKAP2	0.2506	0.6289	ortholog_one2one	0.398474
ENSMUSG00000040549	Ckap5	CKAP5	0.0246	0.3701	ortholog_one2one	0.0664685
ENSMUSG00000028044	Cks1b	CKS1B	0	0	ortholog_one2one	NA
ENSMUSG00000064302	Clasp1	CLASP1	0.0095	0.4801	ortholog_one2one	0.0197875
ENSMUSG00000033392	Clasp2	CLASP2	NA	NA	ortholog_one2one	NA
ENSMUSG00000037242	Clic4	CLIC4	0.0055	0.6786	ortholog_one2one	0.00810492
ENSMUSG00000022949	Clic6	CLIC6	0.2169	1.2495	ortholog_one2one	0.173589
ENSMUSG00000006169	Clint1	CLINT1	0.0275	0.4068	ortholog_one2one	0.0676008
ENSMUSG00000025439	Clns1a	CLNS1A	0.045	0.4261	ortholog_one2one	0.105609
ENSMUSG00000029238	Clock	CLOCK	0.0225	0.3965	ortholog_one2one	0.0567465
ENSMUSG00000021610	Clptm1l	CLPTM1L	0.0355	0.6735	ortholog_one2one	0.0527097
ENSMUSG00000039953	Clstn1	CLSTN1	0.0385	0.8777	ortholog_one2one	0.0438646
ENSMUSG00000028478	Clta	CLTA	0.0061	0.3012	ortholog_one2one	0.0202523
ENSMUSG00000047126	Cltc	CLTC	0.0008	0.4057	ortholog_one2one	0.0019719
ENSMUSG00000030282	Cmas	CMAS	0.0347	0.517	ortholog_one2one	0.067118
ENSMUSG00000034390	Cmip	CMIP	0.0113	0.5892	ortholog_one2one	0.0191785
ENSMUSG00000028719	Cmpk1	CMPK1	0.0424	0.356	ortholog_one2one	0.119101
ENSMUSG00000032434	Cmtm6	CMTM6	0.1089	0.9045	ortholog_one2one	0.120398
ENSMUSG00000036810	Cnep1r1	CNEP1R1	0	0	ortholog_one2one	NA
ENSMUSG00000015202	Cnksr3	CNKSR3	0.0403	0.6495	ortholog_one2one	0.0620477
ENSMUSG00000053931	Cnn3	CNN3	0.0096	0.539	ortholog_one2one	0.0178108
ENSMUSG00000036550	Cnot1	CNOT1	0.003	0.342	ortholog_one2one	0.00877193
ENSMUSG00000056167	Cnot10	CNOT10	0.0243	0.5693	ortholog_one2one	0.042684
ENSMUSG00000003135	Cnot11	CNOT11	0.0196	0.4237	ortholog_one2one	0.0462591
ENSMUSG00000020362	Cnot6	CNOT6	0.0182	0.302	ortholog_one2one	0.0602649
ENSMUSG00000034724	Cnot6l	CNOT6L	0.011	0.1188	ortholog_one2one	0.0925926
ENSMUSG00000031601	Cnot7	CNOT7	0.0016	0.3186	ortholog_one2one	0.00502197
ENSMUSG00000026174	Cnot9	CNOT9	0.0017	0.3128	ortholog_one2one	0.00543478
ENSMUSG00000078653	Cntd1	CNTD1	0.0889	0.4048	ortholog_one2one	0.219615
ENSMUSG00000026112	Coa5	COA5	0.0955	0.4371	ortholog_one2one	0.218485
ENSMUSG00000031979	Cog2	COG2	0.0871	0.8698	ortholog_one2one	0.100138
ENSMUSG00000026553	Copa	COPA	0.0074	0.3988	ortholog_one2one	0.0185557
ENSMUSG00000030754	Copb1	COPB1	0.0039	0.409	ortholog_one2one	0.00953545
ENSMUSG00000032458	Copb2	COPB2	0.0076	0.3733	ortholog_one2one	0.020359
ENSMUSG00000031458	Coprs	COPRS	0.168	0.5202	ortholog_one2one	0.322953
ENSMUSG00000026240	Cops7b	COPS7B	0.1598	0.5227	ortholog_one2one	0.30572
ENSMUSG00000034432	Cops8	COPS8	0.0233	0.3962	ortholog_one2one	0.0588087
ENSMUSG00000025981	Coq10b	COQ10B	0.0791	0.6447	ortholog_one2one	0.122693
ENSMUSG00000020544	Cox11	COX11	0.1057	0.4317	ortholog_one2one	0.244846
ENSMUSG00000023020	Cox14	COX14	0.097	0.4447	ortholog_one2one	0.218125
ENSMUSG00000040018	Cox15	COX15	0.0565	0.4135	ortholog_one2one	0.136638
ENSMUSG00000024248	Cox7a2l	COX7A2L	0.0533	0.2846	ortholog_one2one	0.18728
ENSMUSG00000039652	Cpeb3	CPEB3	0.0115	0.3686	ortholog_one2one	0.0311991
ENSMUSG00000020300	Cpeb4	CPEB4	0.0075	0.3091	ortholog_one2one	0.024264
ENSMUSG00000074643	Cpne1	CPNE1	0.0445	0.5691	ortholog_one2one	0.0781936
ENSMUSG00000022742	Cpox	CPOX	0.1038	0.5726	ortholog_one2one	0.181278
ENSMUSG00000054309	Cpsf3	CPSF3	0.0069	0.5826	ortholog_one2one	0.0118435
ENSMUSG00000029625	Cpsf4	CPSF4	0.0036	0.4429	ortholog_one2one	0.00812825
ENSMUSG00000055531	Cpsf6	CPSF6	0.0017	0.3717	ortholog_one2one	0.00457358
ENSMUSG00000032291	Crabp1	CRABP1	0.0031	0.563	ortholog_one2one	0.00550622
ENSMUSG00000025958	Creb1	CREB1	0.0014	0.1881	ortholog_one2one	0.00744285
ENSMUSG00000048249	Crebrf	CREBRF	0.0276	0.466	ortholog_one2one	0.0592275
ENSMUSG00000023272	Creld2	CRELD2	0.1444	1.0626	ortholog_one2one	0.135893
ENSMUSG00000024074	Crim1	CRIM1	0.0553	0.4409	ortholog_one2one	0.125425
ENSMUSG00000017776	Crk	CRK	0.0015	0.1767	ortholog_one2one	0.00848896
ENSMUSG00000006134	Crkl	CRKL	0.0159	0.3832	ortholog_one2one	0.0414927
ENSMUSG00000017561	Crlf3	CRLF3	0.036	0.4956	ortholog_one2one	0.0726392
ENSMUSG00000001767	Crnkl1	CRNKL1	0.0171	0.579	ortholog_one2one	0.0295337
ENSMUSG00000003623	Crot	CROT	0.0817	0.5246	ortholog_one2one	0.155738
ENSMUSG00000020038	Cry1	CRY1	0.0181	0.4837	ortholog_one2one	0.0374199
ENSMUSG00000068742	Cry2	CRY2	0.027	0.4326	ortholog_one2one	0.0624133
ENSMUSG00000019866	Crybg1	CRYBG1	0.1289	0.5742	ortholog_one2one	0.224486
ENSMUSG00000068823	Csde1	CSDE1	0.0068	0.2375	ortholog_one2one	0.0286316
ENSMUSG00000002718	Cse1l	CSE1L	0.0048	0.5475	ortholog_one2one	0.00876712
ENSMUSG00000032312	Csk	CSK	0.0039	0.7	ortholog_one2one	0.00557143
ENSMUSG00000025162	Csnk1d	CSNK1D	0.0178	0.6776	ortholog_one2one	0.0262692
ENSMUSG00000032384	Csnk1g1	CSNK1G1	0.0361	0.2796	ortholog_one2one	0.129113
ENSMUSG00000046707	Csnk2a2	CSNK2A2	0.005	0.2404	ortholog_one2one	0.0207987
ENSMUSG00000027445	Cst9	CST9L	0.4247	1.5321	ortholog_one2one	0.277201
ENSMUSG00000031256	Cstf2	CSTF2	0.033	0.3624	ortholog_one2one	0.0910596
ENSMUSG00000053536	Cstf2t	CSTF2T	0.0409	0.4513	ortholog_one2one	0.0906271
ENSMUSG00000027176	Cstf3	CSTF3	0.0032	0.3191	ortholog_one2one	0.0100282
ENSMUSG00000037373	Ctbp1	CTBP1	0.0091	0.817	ortholog_one2one	0.0111383
ENSMUSG00000030970	Ctbp2	CTBP2	0.0612	0.6516	ortholog_one2one	0.0939227
ENSMUSG00000078429	Ctdsp2	CTDSP2	0.0232	0.4863	ortholog_one2one	0.0477072
ENSMUSG00000033411	Ctdspl2	CTDSPL2	0.0118	0.2538	ortholog_one2one	0.0464933
ENSMUSG00000054196	Cthrc1	CTHRC1	0.0286	0.502	ortholog_one2one	0.0569721
ENSMUSG00000037815	Ctnna1	CTNNA1	0.0031	0.3889	ortholog_one2one	0.0079712
ENSMUSG00000006932	Ctnnb1	CTNNB1	0.0006	0.4515	ortholog_one2one	0.0013289
ENSMUSG00000028988	Ctnnbip1	CTNNBIP1	0.0099	0.4601	ortholog_one2one	0.0215171
ENSMUSG00000005949	Ctns	CTNS	0.1051	0.7453	ortholog_one2one	0.141017
ENSMUSG00000062127	Cttnbp2nl	CTTNBP2NL	0.0533	0.4623	ortholog_one2one	0.115293
ENSMUSG00000004364	Cul3	CUL3	0.0023	0.2673	ortholog_one2one	0.00860456
ENSMUSG00000031446	Cul4a	CUL4A	0.0222	0.9218	ortholog_one2one	0.0240833
ENSMUSG00000031095	Cul4b	CUL4B	0.0296	0.4032	ortholog_one2one	0.0734127
ENSMUSG00000004096	Cwc15	CWC15	0.0039	0.5389	ortholog_one2one	0.00723696
ENSMUSG00000018541	Cwc25	CWC25	0.0442	0.7836	ortholog_one2one	0.0564063
ENSMUSG00000025898	Cwf19l2	CWF19L2	0.1625	0.5661	ortholog_one2one	0.287052
ENSMUSG00000045382	Cxcr4	CXCR4	0.0517	0.8456	ortholog_one2one	0.06114
ENSMUSG00000024560	Cxxc1	CXXC1	0.0165	0.5797	ortholog_one2one	0.028463
ENSMUSG00000046668	Cxxc5	CXXC5	0.0205	0.3706	ortholog_one2one	0.0553157
ENSMUSG00000019590	Cyb561	CYB561	0.0682	0.8519	ortholog_one2one	0.0800563
ENSMUSG00000053929	Cyhr1	CYHR1	0.2147	0.9413	ortholog_one2one	0.228089
ENSMUSG00000001467	Cyp51	CYP51A1	0.043	0.4479	ortholog_one2one	0.0960036
ENSMUSG00000047044	D030056L22Rik	C9orf40	0.2572	0.5736	ortholog_one2one	0.448396
ENSMUSG00000020255	D10Wsu102e	C12orf45	0.1645	0.7759	ortholog_one2one	0.212012
ENSMUSG00000044548	Dact1	DACT1	0.0966	0.6168	ortholog_one2one	0.156615
ENSMUSG00000039952	Dag1	DAG1	0.0363	0.5419	ortholog_one2one	0.0669865
ENSMUSG00000019039	Dalrd3	DALRD3	0.1429	0.6708	ortholog_one2one	0.213029
ENSMUSG00000068921	Dap3	DAP3	0.102	0.5701	ortholog_one2one	0.178916
ENSMUSG00000026356	Dars	DARS	0.0183	0.3647	ortholog_one2one	0.0501782
ENSMUSG00000069565	Dazap1	DAZAP1	0.007	0.5636	ortholog_one2one	0.0124202
ENSMUSG00000000346	Dazap2	DAZAP2	0.29	0.6318	ortholog_one2one	0.459006
ENSMUSG00000010592	Dazl	DAZL	0.0606	0.3064	ortholog_one2one	0.197781
ENSMUSG00000002297	Dbf4	DBF4	0.215	0.5818	ortholog_one2one	0.369543
ENSMUSG00000034675	Dbn1	DBN1	0.0548	0.4573	ortholog_one2one	0.119834
ENSMUSG00000028436	Dcaf12	DCAF12	0.0073	0.3579	ortholog_one2one	0.0203968
ENSMUSG00000022300	Dcaf13	DCAF13	0.0342	0.4763	ortholog_one2one	0.0718035
ENSMUSG00000049354	Dcaf7	DCAF7	0	0	ortholog_one2one	NA
ENSMUSG00000029366	Dck	DCK	0.0354	0.5463	ortholog_one2one	0.0647996
ENSMUSG00000021962	Dcp1a	DCP1A	0.0603	0.3285	ortholog_one2one	0.183562
ENSMUSG00000024472	Dcp2	DCP2	0.0354	0.4348	ortholog_one2one	0.0814167
ENSMUSG00000032040	Dcps	DCPS	0.0521	0.5826	ortholog_one2one	0.0894267
ENSMUSG00000031562	Dctd	DCTD	0.0327	0.7276	ortholog_one2one	0.0449423
ENSMUSG00000024603	Dctn4	DCTN4	0.0157	0.4458	ortholog_one2one	0.0352176
ENSMUSG00000031516	Dctn6	DCTN6	0.117	0.979	ortholog_one2one	0.11951
ENSMUSG00000032002	Dcun1d5	DCUN1D5	0.0152	0.2695	ortholog_one2one	0.0564007
ENSMUSG00000024740	Ddb1	DDB1	0.002	0.4935	ortholog_one2one	0.00405268
ENSMUSG00000037697	Ddhd1	DDHD1	0.0534	0.4593	ortholog_one2one	0.116264
ENSMUSG00000020108	Ddit4	DDIT4	0.0348	0.692	ortholog_one2one	0.050289
ENSMUSG00000028757	Ddost	DDOST	0.0253	0.6815	ortholog_one2one	0.037124
ENSMUSG00000003534	Ddr1	DDR1	0.0317	0.6079	ortholog_one2one	0.0521467
ENSMUSG00000053289	Ddx10	DDX10	0.0787	0.4578	ortholog_one2one	0.171909
ENSMUSG00000055065	Ddx17	DDX17	0.0057	0.4892	ortholog_one2one	0.0116517
ENSMUSG00000020075	Ddx21	DDX21	0.0987	0.5971	ortholog_one2one	0.165299
ENSMUSG00000032101	Ddx25	DDX25	0.0364	0.5112	ortholog_one2one	0.071205
ENSMUSG00000019432	Ddx39b	DDX39B	0.0021	0.4491	ortholog_one2one	0.00467602
ENSMUSG00000000787	Ddx3x	DDX3X	0.0069	0.3605	ortholog_one2one	0.0191401
ENSMUSG00000021758	Ddx4	DDX4	0.0538	0.5104	ortholog_one2one	0.105408
ENSMUSG00000020705	Ddx42	DDX42	0.0187	0.3935	ortholog_one2one	0.0475222
ENSMUSG00000020719	Ddx5	DDX5	0.0036	0.2838	ortholog_one2one	0.012685
ENSMUSG00000032097	Ddx6	DDX6	0.0108	0.245	ortholog_one2one	0.0440816
ENSMUSG00000021377	Dek	DEK	0.0521	0.5335	ortholog_one2one	0.097657
ENSMUSG00000007379	Dennd2c	DENND2C	0.0903	0.5156	ortholog_one2one	0.175136
ENSMUSG00000035901	Dennd5a	DENND5A	0.0106	0.4049	ortholog_one2one	0.0261793
ENSMUSG00000040818	Dennd6a	DENND6A	0.023	0.3321	ortholog_one2one	0.0692562
ENSMUSG00000023106	Denr	DENR	0.0163	0.3947	ortholog_one2one	0.0412972
ENSMUSG00000022365	Derl1	DERL1	0.0119	0.3044	ortholog_one2one	0.0390933
ENSMUSG00000026502	Desi2	DESI2	0.0168	0.414	ortholog_one2one	0.0405797
ENSMUSG00000030747	Dgat2	DGAT2	0.0255	0.5437	ortholog_one2one	0.0469009
ENSMUSG00000070738	Dgkd	DGKD	0.029	0.6633	ortholog_one2one	0.0437208
ENSMUSG00000000276	Dgke	DGKE	0.0464	0.4873	ortholog_one2one	0.0952186
ENSMUSG00000058454	Dhcr7	DHCR7	NA	NA	ortholog_one2one	NA
ENSMUSG00000012117	Dhdds	DHDDS	0.0377	0.5321	ortholog_one2one	0.0708513
ENSMUSG00000029169	Dhx15	DHX15	0.0017	0.3348	ortholog_one2one	0.00507766
ENSMUSG00000027655	Dhx35	DHX35	0.0265	0.4933	ortholog_one2one	0.0537198
ENSMUSG00000027770	Dhx36	DHX36	0.0399	0.4663	ortholog_one2one	0.0855672
ENSMUSG00000042699	Dhx9	DHX9	0.0413	0.4796	ortholog_one2one	0.0861134
ENSMUSG00000041415	Dicer1	DICER1	0.0349	0.4133	ortholog_one2one	0.0844423
ENSMUSG00000038914	Dido1	DIDO1	0.158	0.8501	ortholog_one2one	0.18586
ENSMUSG00000031403	Dkc1	DKC1	0.0497	0.4628	ortholog_one2one	0.10739
ENSMUSG00000000168	Dlat	DLAT	0.0776	0.505	ortholog_one2one	0.153663
ENSMUSG00000022770	Dlg1	DLG1	0.0213	0.4152	ortholog_one2one	0.0513006
ENSMUSG00000041911	Dlx1	DLX1	0.0051	0.4575	ortholog_one2one	0.0111475
ENSMUSG00000024837	Dmrt1	DMRT1	0.0859	0.6742	ortholog_one2one	0.12741
ENSMUSG00000030410	Dmwd	DMWD	0.0364	0.803	ortholog_one2one	0.04533
ENSMUSG00000041268	Dmxl2	DMXL2	0.0361	0.4896	ortholog_one2one	0.0737337
ENSMUSG00000018581	Dnah11	DNAH11	0.0861	0.5623	ortholog_one2one	0.153121
ENSMUSG00000028410	Dnaja1	DNAJA1	0.0022	0.4583	ortholog_one2one	0.00480035
ENSMUSG00000031701	Dnaja2	DNAJA2	0.0023	0.3432	ortholog_one2one	0.00670163
ENSMUSG00000032285	Dnaja4	DNAJA4	0.0335	0.4177	ortholog_one2one	0.0802011
ENSMUSG00000029131	Dnajb6	DNAJB6	0.0907	0.4888	ortholog_one2one	0.185556
ENSMUSG00000014905	Dnajb9	DNAJB9	0.0292	0.3398	ortholog_one2one	0.0859329
ENSMUSG00000027006	Dnajc10	DNAJC10	0.0495	0.5268	ortholog_one2one	0.0939636
ENSMUSG00000036764	Dnajc12	DNAJC12	0.1472	0.5964	ortholog_one2one	0.246814
ENSMUSG00000014195	Dnajc7	DNAJC7	0.0138	0.407	ortholog_one2one	0.0339066
ENSMUSG00000054405	Dnajc8	DNAJC8	0.0035	0.5882	ortholog_one2one	0.00595036
ENSMUSG00000044595	Dnd1	DND1	0.0712	0.7662	ortholog_one2one	0.0929261
ENSMUSG00000004099	Dnmt1	DNMT1	0.1411	0.9602	ortholog_one2one	0.146949
ENSMUSG00000020661	Dnmt3a	DNMT3A	0.0179	0.493	ortholog_one2one	0.0363083
ENSMUSG00000017299	Dnttip1	DNTTIP1	0.017	0.5548	ortholog_one2one	0.0306417
ENSMUSG00000039756	Dnttip2	DNTTIP2	0.2584	0.5911	ortholog_one2one	0.437151
ENSMUSG00000058325	Dock1	DOCK1	0.0168	0.7239	ortholog_one2one	0.0232076
ENSMUSG00000031093	Dock11	DOCK11	0.0173	0.4002	ortholog_one2one	0.0432284
ENSMUSG00000039716	Dock3	DOCK3	0.0091	0.3653	ortholog_one2one	0.024911
ENSMUSG00000044447	Dock5	DOCK5	0.0336	0.6683	ortholog_one2one	0.0502768
ENSMUSG00000025558	Dock9	DOCK9	0.0262	0.6411	ortholog_one2one	0.0408673
ENSMUSG00000061589	Dot1l	DOT1L	0.0808	0.9206	ortholog_one2one	0.0877688
ENSMUSG00000024826	Dpf2	DPF2	0.0066	0.4889	ortholog_one2one	0.0134997
ENSMUSG00000057147	Dph6	DPH6	0.0633	0.5546	ortholog_one2one	0.114136
ENSMUSG00000022048	Dpysl2	DPYSL2	0.0161	0.485	ortholog_one2one	0.0331959
ENSMUSG00000029265	Dr1	DR1	0.0027	0.3153	ortholog_one2one	0.00856327
ENSMUSG00000027635	Dsn1	DSN1	0.1874	0.4325	ortholog_one2one	0.433295
ENSMUSG00000042046	Dstyk	DSTYK	0.0454	0.412	ortholog_one2one	0.110194
ENSMUSG00000024302	Dtna	DTNA	0.0193	0.4505	ortholog_one2one	0.0428413
ENSMUSG00000018648	Dusp14	DUSP14	0.0274	0.4015	ortholog_one2one	0.0682441
ENSMUSG00000031383	Dusp9	DUSP9	0.0778	0.8199	ortholog_one2one	0.0948896
ENSMUSG00000027203	Dut	DUT	0.1596	0.9493	ortholog_one2one	0.168124
ENSMUSG00000020888	Dvl2	DVL2	0.0155	0.645	ortholog_one2one	0.024031
ENSMUSG00000003233	Dvl3	DVL3	0.0085	0.5995	ortholog_one2one	0.0141785
ENSMUSG00000035770	Dync1li2	DYNC1LI2	0.0146	0.3996	ortholog_one2one	0.0365365
ENSMUSG00000020483	Dynll2	DYNLL2	0	0	ortholog_one2one	NA
ENSMUSG00000047459	Dynlrb1	DYNLRB1	0.0138	0.4693	ortholog_one2one	0.0294055
ENSMUSG00000022897	Dyrk1a	DYRK1A	0.0036	0.2689	ortholog_one2one	0.0133879
ENSMUSG00000045071	E130308A19Rik	KIAA1958	0.2864	0.751	ortholog_one2one	0.381358
ENSMUSG00000027490	E2f1	E2F1	0.0826	0.6391	ortholog_one2one	0.129244
ENSMUSG00000027552	E2f5	E2F5	0.0707	0.3854	ortholog_one2one	0.183446
ENSMUSG00000057469	E2f6	E2F6	0.0687	0.739	ortholog_one2one	0.0929635
ENSMUSG00000019883	Echdc1	ECHDC1	0.1143	0.6358	ortholog_one2one	0.179774
ENSMUSG00000027699	Ect2	ECT2	0.0436	0.6164	ortholog_one2one	0.0707333
ENSMUSG00000030104	Edem1	EDEM1	0.0325	0.4897	ortholog_one2one	0.0663672
ENSMUSG00000030619	Eed	EED	0	0	ortholog_one2one	NA
ENSMUSG00000035064	Eef2k	EEF2K	0.0499	0.7941	ortholog_one2one	0.0628384
ENSMUSG00000015002	Efr3a	EFR3A	0.0133	0.4592	ortholog_one2one	0.0289634
ENSMUSG00000020929	Eftud2	EFTUD2	0.0028	0.456	ortholog_one2one	0.00614035
ENSMUSG00000038418	Egr1	EGR1	0.0325	0.7039	ortholog_one2one	0.0461713
ENSMUSG00000037868	Egr2	EGR2	0.0558	0.4872	ortholog_one2one	0.114532
ENSMUSG00000071341	Egr4	EGR4	0.0692	0.7844	ortholog_one2one	0.0882203
ENSMUSG00000024772	Ehd1	EHD1	0.0022	1.5613	ortholog_one2one	0.00140908
ENSMUSG00000036893	Ehmt1	EHMT1	0.0582	0.7755	ortholog_one2one	0.0750484
ENSMUSG00000013787	Ehmt2	EHMT2	0.022	0.6955	ortholog_one2one	0.0316319
ENSMUSG00000062762	Ei24	EI24	0.0085	0.3072	ortholog_one2one	0.0276693
ENSMUSG00000091337	Eid1	EID1	0.1874	3.2642	ortholog_one2one	0.0574107
ENSMUSG00000046058	Eid2	EID2	0.1453	2.2893	ortholog_one2one	0.0634692
ENSMUSG00000006941	Eif1b	EIF1B	0	0	ortholog_one2one	NA
ENSMUSG00000029613	Eif2ak1	EIF2AK1	0.0975	0.5557	ortholog_one2one	0.175454
ENSMUSG00000074656	Eif2s2	EIF2S2	0.0184	0.2882	ortholog_one2one	0.0638446
ENSMUSG00000024991	Eif3a	EIF3A	0.0188	0.6476	ortholog_one2one	0.0290303
ENSMUSG00000056076	Eif3b	EIF3B	0.0684	0.9786	ortholog_one2one	0.0698958
ENSMUSG00000016554	Eif3d	EIF3D	0.0048	0.5617	ortholog_one2one	0.00854549
ENSMUSG00000027170	Eif3m	EIF3M	0.0025	0.4046	ortholog_one2one	0.00617894
ENSMUSG00000059796	Eif4a1	EIF4A1	0	0	ortholog_one2one	NA
ENSMUSG00000028156	Eif4e	EIF4E	0.0084	0.2617	ortholog_one2one	0.0320978
ENSMUSG00000020091	Eif4ebp2	EIF4EBP2	0.0228	0.3678	ortholog_one2one	0.0619902
ENSMUSG00000020454	Eif4enif1	EIF4ENIF1	0.0532	0.3483	ortholog_one2one	0.152742
ENSMUSG00000005610	Eif4g2	EIF4G2	0.0041	0.1776	ortholog_one2one	0.0230856
ENSMUSG00000050192	Eif5a2	EIF5A2	0	0	ortholog_one2one	NA
ENSMUSG00000026083	Eif5b	EIF5B	0.0427	0.591	ortholog_one2one	0.0722504
ENSMUSG00000040028	Elavl1	ELAVL1	0.0069	0.475	ortholog_one2one	0.0145263
ENSMUSG00000008489	Elavl2	ELAVL2	0.0012	0.1736	ortholog_one2one	0.00691244
ENSMUSG00000037174	Elf2	ELF2	0.0426	0.4098	ortholog_one2one	0.103953
ENSMUSG00000031103	Elf4	ELF4	0.1201	0.4522	ortholog_one2one	0.26559
ENSMUSG00000009406	Elk1	ELK1	0.0802	0.4982	ortholog_one2one	0.16098
ENSMUSG00000070002	Ell	ELL	0.1038	1.2964	ortholog_one2one	0.0800679
ENSMUSG00000035151	Elmod2	ELMOD2	0.0712	0.748	ortholog_one2one	0.0951872
ENSMUSG00000006390	Elovl1	ELOVL1	0.0414	0.4375	ortholog_one2one	0.0946286
ENSMUSG00000032349	Elovl5	ELOVL5	0.0327	0.7331	ortholog_one2one	0.0446051
ENSMUSG00000030286	Emc3	EMC3	0.0018	0.4433	ortholog_one2one	0.00406046
ENSMUSG00000047260	Emc6	EMC6	0	0	ortholog_one2one	NA
ENSMUSG00000001964	Emd	EMD	0.1327	0.7576	ortholog_one2one	0.175158
ENSMUSG00000004268	Emg1	EMG1	0.0652	0.5512	ortholog_one2one	0.118287
ENSMUSG00000032624	Eml4	EML4	0.06	0.4186	ortholog_one2one	0.143335
ENSMUSG00000051166	Eml5	EML5	0.0203	0.4052	ortholog_one2one	0.0500987
ENSMUSG00000022995	Enah	ENAH	0.0486	0.4064	ortholog_one2one	0.119587
ENSMUSG00000041773	Enc1	ENC1	0.0031	0.5128	ortholog_one2one	0.00604524
ENSMUSG00000023961	Enpp4	ENPP4	0.1056	0.5009	ortholog_one2one	0.210821
ENSMUSG00000038619	Ensa	ENSA	0.0075	0.146	ortholog_one2one	0.0513699
ENSMUSG00000033068	Entpd6	ENTPD6	0.0698	0.6477	ortholog_one2one	0.107766
ENSMUSG00000055024	Ep300	EP300	0.031	0.3714	ortholog_one2one	0.083468
ENSMUSG00000029505	Ep400	EP400	0.0742	0.7257	ortholog_one2one	0.102246
ENSMUSG00000024140	Epas1	EPAS1	0.0595	0.7021	ortholog_one2one	0.0847458
ENSMUSG00000028906	Epb41	EPB41	0.0523	0.435	ortholog_one2one	0.12023
ENSMUSG00000019978	Epb41l2	EPB41L2	0.0991	0.3981	ortholog_one2one	0.248932
ENSMUSG00000024044	Epb41l3	EPB41L3	0.0677	0.7204	ortholog_one2one	0.0939756
ENSMUSG00000028434	Epb41l4b	EPB41L4B	0.0859	0.5105	ortholog_one2one	0.168266
ENSMUSG00000069495	Epc2	EPC2	0.0151	0.1925	ortholog_one2one	0.0784416
ENSMUSG00000046785	Epm2aip1	EPM2AIP1	0.054	0.4577	ortholog_one2one	0.117981
ENSMUSG00000035203	Epn1	EPN1	0.025	0.5927	ortholog_one2one	0.0421799
ENSMUSG00000028552	Eps15	EPS15	0.1111	0.4116	ortholog_one2one	0.269922
ENSMUSG00000021583	Erap1	ERAP1	0.0794	0.4848	ortholog_one2one	0.163779
ENSMUSG00000062312	Erbb2	ERBB2	0.0646	0.5885	ortholog_one2one	0.109771
ENSMUSG00000051220	Ercc6l	ERCC6L	0.1616	0.487	ortholog_one2one	0.331828
ENSMUSG00000021694	Ercc8	ERCC8	0.0516	0.6084	ortholog_one2one	0.0848126
ENSMUSG00000040732	Erg	ERG	0.0141	0.5193	ortholog_one2one	0.0271519
ENSMUSG00000021252	Erg28	ERG28	0.0104	0.3251	ortholog_one2one	0.0319902
ENSMUSG00000001576	Ergic1	ERGIC1	0.0059	0.7159	ortholog_one2one	0.00824137
ENSMUSG00000030304	Ergic2	ERGIC2	0.0214	0.3822	ortholog_one2one	0.0559916
ENSMUSG00000030929	Eri2	ERI2	0.1578	0.5073	ortholog_one2one	0.311059
ENSMUSG00000025198	Erlin1	ERLIN1	0.0252	0.3081	ortholog_one2one	0.0817916
ENSMUSG00000021831	Ero1l	ERO1A	0.0367	0.5455	ortholog_one2one	0.0672777
ENSMUSG00000028967	Errfi1	ERRFI1	0.0939	0.4338	ortholog_one2one	0.216459
ENSMUSG00000022034	Esco2	ESCO2	0.1721	0.4849	ortholog_one2one	0.354919
ENSMUSG00000045624	Esf1	ESF1	0.1074	0.4945	ortholog_one2one	0.217189
ENSMUSG00000040728	Esrp1	ESRP1	0.0148	0.3796	ortholog_one2one	0.0389884
ENSMUSG00000021171	Esyt2	ESYT2	0.039	0.487	ortholog_one2one	0.0800821
ENSMUSG00000016984	Etaa1	ETAA1	0.3286	0.5735	ortholog_one2one	0.572973
ENSMUSG00000039958	Etfbkmt	ETFBKMT	0.114	0.4042	ortholog_one2one	0.282039
ENSMUSG00000030275	Etnk1	ETNK1	0.0274	0.6111	ortholog_one2one	0.0448372
ENSMUSG00000032035	Ets1	ETS1	0.05	0.473	ortholog_one2one	0.105708
ENSMUSG00000003382	Etv3	ETV3	0.0754	0.4731	ortholog_one2one	0.159374
ENSMUSG00000030199	Etv6	ETV6	0.0454	0.3527	ortholog_one2one	0.128721
ENSMUSG00000011831	Evi5	EVI5	0.0408	0.4096	ortholog_one2one	0.0996094
ENSMUSG00000009079	Ewsr1	EWSR1	0.0106	0.2307	ortholog_one2one	0.0459471
ENSMUSG00000032705	Exd2	EXD2	0.0714	0.4751	ortholog_one2one	0.150284
ENSMUSG00000027963	Extl2	EXTL2	0.0674	0.6959	ortholog_one2one	0.096853
ENSMUSG00000052397	Ezr	EZR	0.0153	1.0253	ortholog_one2one	0.0149225
ENSMUSG00000038235	F11r	F11R	0.1996	0.5775	ortholog_one2one	0.345628
ENSMUSG00000025873	Faf2	FAF2	0.0105	0.449	ortholog_one2one	0.0233853
ENSMUSG00000032463	Faim	FAIM	0.1005	0.9795	ortholog_one2one	0.102603
ENSMUSG00000039157	Fam102a	FAM102A	0.0208	0.8178	ortholog_one2one	0.0254341
ENSMUSG00000026655	Fam107b	FAM107B	0.0072	0.516	ortholog_one2one	0.0139535
ENSMUSG00000020523	Fam114a2	FAM114A2	0.1155	0.4716	ortholog_one2one	0.244911
ENSMUSG00000038893	Fam117a	FAM117A	0.0651	0.3501	ortholog_one2one	0.185947
ENSMUSG00000041040	Fam117b	FAM117B	0.0429	0.4332	ortholog_one2one	0.0990305
ENSMUSG00000022434	Fam118a	FAM118A	0.0387	0.6497	ortholog_one2one	0.059566
ENSMUSG00000050471	Fam118b	FAM118B	0.0097	0.3426	ortholog_one2one	0.0283129
ENSMUSG00000038014	Fam120a	FAM120A	0.0153	0.3168	ortholog_one2one	0.0482955
ENSMUSG00000058503	Fam133b	FAM133B	0.0659	0.7311	ortholog_one2one	0.0901381
ENSMUSG00000037503	Fam168b	FAM168B	0.0053	0.3074	ortholog_one2one	0.0172414
ENSMUSG00000041817	Fam169a	FAM169A	0.105	0.4673	ortholog_one2one	0.224695
ENSMUSG00000051185	Fam174a	FAM174A	0.2059	0.5953	ortholog_one2one	0.345876
ENSMUSG00000037210	Fam193a	FAM193A	0.0585	0.5007	ortholog_one2one	0.116836
ENSMUSG00000057858	Fam204a	FAM204A	0.1186	0.4135	ortholog_one2one	0.28682
ENSMUSG00000033557	Fam20b	FAM20B	0.0131	0.3758	ortholog_one2one	0.034859
ENSMUSG00000034858	Fam214a	FAM214A	0.1523	0.7364	ortholog_one2one	0.206817
ENSMUSG00000029463	Fam216a	FAM216A	0.1748	0.6354	ortholog_one2one	0.275102
ENSMUSG00000047115	Fam221a	FAM221A	0.0951	0.4829	ortholog_one2one	0.196935
ENSMUSG00000050549	Fam241a	FAM241A	0.1895	0.3088	ortholog_one2one	0.613666
ENSMUSG00000003039	Fam32a	FAM32A	0.0108	1.398	ortholog_one2one	0.00772532
ENSMUSG00000024993	Fam45a	DENND10	0.0497	0.3992	ortholog_one2one	0.124499
ENSMUSG00000022378	Fam49b	FAM49B	0.0014	0.2568	ortholog_one2one	0.00545171
ENSMUSG00000037339	Fam53a	FAM53A	0.2027	0.848	ortholog_one2one	0.239033
ENSMUSG00000034300	Fam53c	FAM53C	0.0288	0.1987	ortholog_one2one	0.144942
ENSMUSG00000037808	Fam76b	FAM76B	0.0109	0.398	ortholog_one2one	0.0273869
ENSMUSG00000027654	Fam83d	FAM83D	0.1254	0.8267	ortholog_one2one	0.151687
ENSMUSG00000037119	Fam91a1	FAM91A1	0.0235	0.5077	ortholog_one2one	0.0462872
ENSMUSG00000027349	Fam98b	FAM98B	0.0397	0.632	ortholog_one2one	0.0628165
ENSMUSG00000034023	Fancd2	FANCD2	0.1643	0.5048	ortholog_one2one	0.325475
ENSMUSG00000007570	Fance	FANCE	0.2585	0.7383	ortholog_one2one	0.350129
ENSMUSG00000028453	Fancg	FANCG	0.1825	0.4692	ortholog_one2one	0.38896
ENSMUSG00000003808	Farsa	FARSA	0.0394	1.0157	ortholog_one2one	0.038791
ENSMUSG00000026245	Farsb	FARSB	0.036	0.5649	ortholog_one2one	0.0637281
ENSMUSG00000070047	Fat1	FAT1	0.0631	0.8726	ortholog_one2one	0.0723126
ENSMUSG00000006369	Fbln1	FBLN1	0.0787	0.7612	ortholog_one2one	0.103389
ENSMUSG00000024598	Fbn2	FBN2	0.0174	0.6961	ortholog_one2one	0.0249964
ENSMUSG00000066892	Fbxl12	FBXL12	NA	NA	ortholog_one2one	NA
ENSMUSG00000030019	Fbxl14	FBXL14	0.003	0.5211	ortholog_one2one	0.00575705
ENSMUSG00000023965	Fbxl17	FBXL17	0.0359	0.3364	ortholog_one2one	0.106718
ENSMUSG00000020883	Fbxl20	FBXL20	0.0011	0.2827	ortholog_one2one	0.00389105
ENSMUSG00000050503	Fbxl22	FBXL22	0.4205	3.0712	ortholog_one2one	0.136917
ENSMUSG00000022124	Fbxl3	FBXL3	0.014	0.5163	ortholog_one2one	0.027116
ENSMUSG00000040410	Fbxl4	FBXL4	0.0372	0.4438	ortholog_one2one	0.0838215
ENSMUSG00000039753	Fbxl5	FBXL5	0.0312	0.3677	ortholog_one2one	0.0848518
ENSMUSG00000022559	Fbxl6	FBXL6	0.1039	0.9342	ortholog_one2one	0.111218
ENSMUSG00000005371	Fbxo11	FBXO11	0.0024	0.3194	ortholog_one2one	0.00751409
ENSMUSG00000032898	Fbxo21	FBXO21	0.0211	0.8151	ortholog_one2one	0.0258864
ENSMUSG00000047539	Fbxo28	FBXO28	0.0262	0.4212	ortholog_one2one	0.0622032
ENSMUSG00000047648	Fbxo30	FBXO30	0.0555	0.4186	ortholog_one2one	0.132585
ENSMUSG00000022358	Fbxo32	FBXO32	0.0146	0.4893	ortholog_one2one	0.0298385
ENSMUSG00000035329	Fbxo33	FBXO33	0.0362	0.3102	ortholog_one2one	0.116699
ENSMUSG00000042211	Fbxo38	FBXO38	0.0325	0.4233	ortholog_one2one	0.0767777
ENSMUSG00000038206	Fbxo8	FBXO8	0.0198	0.3342	ortholog_one2one	0.059246
ENSMUSG00000001366	Fbxo9	FBXO9	0.0457	0.5056	ortholog_one2one	0.0903877
ENSMUSG00000020271	Fbxw11	FBXW11	0.0017	0.373	ortholog_one2one	0.00455764
ENSMUSG00000035949	Fbxw2	FBXW2	0.0072	0.1553	ortholog_one2one	0.0463619
ENSMUSG00000028086	Fbxw7	FBXW7	0.0184	0.376	ortholog_one2one	0.0489362
ENSMUSG00000041685	Fcho2	FCHO2	0.0278	0.4464	ortholog_one2one	0.062276
ENSMUSG00000030691	Fchsd2	FCHSD2	0.0163	0.3407	ortholog_one2one	0.0478427
ENSMUSG00000024742	Fen1	FEN1	0.0167	0.5313	ortholog_one2one	0.0314323
ENSMUSG00000034037	Fgd5	FGD5	0.1904	1.0576	ortholog_one2one	0.18003
ENSMUSG00000020021	Fgd6	FGD6	0.1552	0.599	ortholog_one2one	0.259098
ENSMUSG00000031565	Fgfr1	FGFR1	0.0065	0.6203	ortholog_one2one	0.0104788
ENSMUSG00000069135	Fgfr1op	FGFR1OP	0.0837	0.4087	ortholog_one2one	0.204796
ENSMUSG00000023092	Fhl1	FHL1	0.0208	0.1576	ortholog_one2one	0.13198
ENSMUSG00000035455	Fignl1	FIGNL1	0.1243	0.4875	ortholog_one2one	0.254974
ENSMUSG00000019054	Fis1	FIS1	0.0202	0.6698	ortholog_one2one	0.0301583
ENSMUSG00000020949	Fkbp3	FKBP3	0.0265	0.3132	ortholog_one2one	0.0846105
ENSMUSG00000030357	Fkbp4	FKBP4	0.0524	0.5375	ortholog_one2one	0.0974884
ENSMUSG00000040013	Fkbp6	FKBP6	0.1169	0.7053	ortholog_one2one	0.165745
ENSMUSG00000029781	Fkbp9	FKBP9	0.0343	0.5077	ortholog_one2one	0.0675596
ENSMUSG00000032633	Flcn	FLCN	0.0361	0.761	ortholog_one2one	0.0474376
ENSMUSG00000000838	Fmr1	FMR1	0.0136	0.1947	ortholog_one2one	0.0698511
ENSMUSG00000062170	Fmr1nb	FMR1NB	0.586	0.9372	ortholog_one2one	0.625267
ENSMUSG00000026193	Fn1	FN1	0.0408	0.5044	ortholog_one2one	0.0808882
ENSMUSG00000039735	Fnbp1l	FNBP1L	0.0109	0.3487	ortholog_one2one	0.031259
ENSMUSG00000008200	Fnbp4	FNBP4	0.0736	0.4835	ortholog_one2one	0.152223
ENSMUSG00000039286	Fndc3b	FNDC3B	0.0352	0.5573	ortholog_one2one	0.0631617
ENSMUSG00000035992	Fnip1	FNIP1	0.0424	0.3184	ortholog_one2one	0.133166
ENSMUSG00000042812	Foxf1	FOXF1	0.029	1.0964	ortholog_one2one	0.0264502
ENSMUSG00000003154	Foxj2	FOXJ2	0.0429	0.433	ortholog_one2one	0.0990762
ENSMUSG00000056493	Foxk1	FOXK1	0.0537	0.8931	ortholog_one2one	0.0601276
ENSMUSG00000034998	Foxn2	FOXN2	0.0803	0.5693	ortholog_one2one	0.14105
ENSMUSG00000044167	Foxo1	FOXO1	0.0335	0.4532	ortholog_one2one	0.0739188
ENSMUSG00000048285	Frmd6	FRMD6	0.0342	0.747	ortholog_one2one	0.0457831
ENSMUSG00000020170	Frs2	FRS2	0.0216	0.4369	ortholog_one2one	0.0494392
ENSMUSG00000021765	Fst	FST	0.0117	0.4492	ortholog_one2one	0.0260463
ENSMUSG00000055932	Fto	FTO	0.0731	0.5514	ortholog_one2one	0.132572
ENSMUSG00000028034	Fubp1	FUBP1	0.0072	0.4297	ortholog_one2one	0.0167559
ENSMUSG00000026843	Fubp3	FUBP3	0.0363	0.4345	ortholog_one2one	0.0835443
ENSMUSG00000011658	Fuz	FUZ	0.0762	0.9507	ortholog_one2one	0.0801515
ENSMUSG00000027680	Fxr1	FXR1	0.0086	0.2219	ortholog_one2one	0.0387562
ENSMUSG00000019843	Fyn	FYN	0.0026	0.3115	ortholog_one2one	0.00834671
ENSMUSG00000022800	Fyttd1	FYTTD1	0.0383	0.4641	ortholog_one2one	0.0825253
ENSMUSG00000007989	Fzd3	FZD3	0.0091	0.3398	ortholog_one2one	0.0267805
ENSMUSG00000035293	G2e3	G2E3	0.1163	0.4878	ortholog_one2one	0.238417
ENSMUSG00000018583	G3bp1	G3BP1	0.0287	0.6575	ortholog_one2one	0.0436502
ENSMUSG00000029405	G3bp2	G3BP2	0.0074	0.3226	ortholog_one2one	0.0229386
ENSMUSG00000038766	Gabpb2	GABPB2	0.0878	0.371	ortholog_one2one	0.236658
ENSMUSG00000000420	Galnt1	GALNT1	0.0073	0.2771	ortholog_one2one	0.0263443
ENSMUSG00000038072	Galnt11	GALNT11	0.0632	0.5513	ortholog_one2one	0.114638
ENSMUSG00000039774	Galnt12	GALNT12	0.0818	0.688	ortholog_one2one	0.118895
ENSMUSG00000071650	Ganab	GANAB	0.044	0.4682	ortholog_one2one	0.0939769
ENSMUSG00000074802	Gas2l3	GAS2L3	0.1412	0.64	ortholog_one2one	0.220625
ENSMUSG00000036180	Gatad2a	GATAD2A	0.0631	0.7248	ortholog_one2one	0.0870585
ENSMUSG00000032350	Gclc	GCLC	0.0289	0.5341	ortholog_one2one	0.0541097
ENSMUSG00000028124	Gclm	GCLM	0.0199	0.3129	ortholog_one2one	0.0635986
ENSMUSG00000021360	Gcnt2	GCNT2	0.1352	0.7913	ortholog_one2one	0.170858
ENSMUSG00000021218	Gdi2	GDI2	0.0178	0.529	ortholog_one2one	0.0336484
ENSMUSG00000061666	Gdpd1	GDPD1	0.0452	0.4803	ortholog_one2one	0.0941078
ENSMUSG00000025089	Gfra1	GFRA1	0.0375	0.4832	ortholog_one2one	0.0776076
ENSMUSG00000030872	Gga2	GGA2	0.0895	0.4928	ortholog_one2one	0.181615
ENSMUSG00000020530	Ggnbp2	GGNBP2	0.017	0.2916	ortholog_one2one	0.058299
ENSMUSG00000041028	Ghitm	GHITM	0.0418	0.3035	ortholog_one2one	0.137727
ENSMUSG00000027573	Gid8	GID8	0.002	0.6255	ortholog_one2one	0.00319744
ENSMUSG00000029714	Gigyf1	GIGYF1	0.0402	0.5677	ortholog_one2one	0.070812
ENSMUSG00000031821	Gins2	GINS2	0.0427	1.2383	ortholog_one2one	0.0344828
ENSMUSG00000034520	Gjc1	GJC1	0.0153	0.3022	ortholog_one2one	0.0506287
ENSMUSG00000021552	Gkap1	GKAP1	0.0586	0.8116	ortholog_one2one	0.0722031
ENSMUSG00000032252	Glce	GLCE	0.0204	0.3286	ortholog_one2one	0.0620816
ENSMUSG00000019715	Gle1	GLE1	0.0978	0.5599	ortholog_one2one	0.174674
ENSMUSG00000021318	Gli3	GLI3	0.0693	0.607	ortholog_one2one	0.114168
ENSMUSG00000028480	Glipr2	GLIPR2	0.0331	0.5882	ortholog_one2one	0.0562734
ENSMUSG00000052942	Glis3	GLIS3	0.0849	0.484	ortholog_one2one	0.175413
ENSMUSG00000021102	Glrx5	GLRX5	0.0317	0.5972	ortholog_one2one	0.053081
ENSMUSG00000026103	Gls	GLS	0.0219	0.3795	ortholog_one2one	0.0577075
ENSMUSG00000026473	Glul	GLUL	0.0267	0.4769	ortholog_one2one	0.0559866
ENSMUSG00000022536	Glyr1	GLYR1	0.0059	0.3141	ortholog_one2one	0.0187838
ENSMUSG00000047227	Gm527	C14orf28	0.0163	0.2381	ortholog_one2one	0.0684586
ENSMUSG00000038705	Gmeb2	GMEB2	0.0303	0.9565	ortholog_one2one	0.031678
ENSMUSG00000062014	Gmfb	GMFB	0.0096	0.4784	ortholog_one2one	0.0200669
ENSMUSG00000034781	Gna11	GNA11	0.0089	4.6193	ortholog_one2one	0.0019267
ENSMUSG00000020611	Gna13	GNA13	0.017	0.4358	ortholog_one2one	0.0390087
ENSMUSG00000032562	Gnai2	GNAI2	0.0083	0.6606	ortholog_one2one	0.0125643
ENSMUSG00000000001	Gnai3	GNAI3	0.0079	0.2774	ortholog_one2one	0.0284787
ENSMUSG00000029064	Gnb1	GNB1	0	0	ortholog_one2one	NA
ENSMUSG00000052102	Gnpda1	GNPDA1	0.0172	0.5171	ortholog_one2one	0.0332624
ENSMUSG00000037722	Gnpnat1	GNPNAT1	0.0078	0.3922	ortholog_one2one	0.0198878
ENSMUSG00000035521	Gnptg	GNPTG	0.1219	0.7716	ortholog_one2one	0.157983
ENSMUSG00000015341	Golga7	GOLGA7	0.0035	0.3166	ortholog_one2one	0.011055
ENSMUSG00000022200	Golph3	GOLPH3	0.0062	0.3146	ortholog_one2one	0.0197076
ENSMUSG00000032513	Gorasp1	GORASP1	0.1053	0.616	ortholog_one2one	0.170942
ENSMUSG00000031672	Got2	GOT2	0.025	0.5176	ortholog_one2one	0.0482998
ENSMUSG00000024978	Gpam	GPAM	0.0392	0.7574	ortholog_one2one	0.051756
ENSMUSG00000034621	Gpatch8	GPATCH8	0.0481	0.3845	ortholog_one2one	0.125098
ENSMUSG00000031119	Gpc4	GPC4	0.0241	0.3846	ortholog_one2one	0.0626625
ENSMUSG00000031148	Gpkow	GPKOW	0.1664	0.5506	ortholog_one2one	0.302216
ENSMUSG00000029464	Gpn3	GPN3	NA	NA	ortholog_one2one	NA
ENSMUSG00000031700	Gpt2	GPT2	0.0299	0.6022	ortholog_one2one	0.0496513
ENSMUSG00000020176	Grb10	GRB10	0.0717	1.0511	ortholog_one2one	0.0682143
ENSMUSG00000059923	Grb2	GRB2	0.002	0.4358	ortholog_one2one	0.00458926
ENSMUSG00000044221	Grsf1	GRSF1	0.0486	0.4324	ortholog_one2one	0.112396
ENSMUSG00000031822	Gse1	GSE1	0.0521	0.8785	ortholog_one2one	0.0593056
ENSMUSG00000022812	Gsk3b	GSK3B	0.0078	0.2872	ortholog_one2one	0.0271588
ENSMUSG00000062203	Gspt1	GSPT1	0.0287	0.3305	ortholog_one2one	0.0868381
ENSMUSG00000031584	Gsr	GSR	0.1009	0.8848	ortholog_one2one	0.114037
ENSMUSG00000020962	Gtf2a1	GTF2A1	0.0161	0.4299	ortholog_one2one	0.0374506
ENSMUSG00000022828	Gtf2e1	GTF2E1	0.033	0.4608	ortholog_one2one	0.0716146
ENSMUSG00000031585	Gtf2e2	GTF2E2	0.0286	0.3915	ortholog_one2one	0.0730524
ENSMUSG00000067995	Gtf2f2	GTF2F2	0.0111	0.4977	ortholog_one2one	0.0223026
ENSMUSG00000006599	Gtf2h1	GTF2H1	0.0146	0.3627	ortholog_one2one	0.0402537
ENSMUSG00000029387	Gtf2h3	GTF2H3	0.0344	0.8104	ortholog_one2one	0.0424482
ENSMUSG00000060261	Gtf2i	GTF2I	0.0136	0.6474	ortholog_one2one	0.0210071
ENSMUSG00000023952	Gtpbp2	GTPBP2	0.0054	0.3259	ortholog_one2one	0.0165695
ENSMUSG00000021149	Gtpbp4	GTPBP4	0.025	0.5693	ortholog_one2one	0.0439136
ENSMUSG00000042638	Gucy2c	GUCY2C	0.1081	0.7295	ortholog_one2one	0.148184
ENSMUSG00000041126	H2afv	H2AFV	0	0	ortholog_one2one	NA
ENSMUSG00000015937	H2afy	H2AFY	0.0075	0.4651	ortholog_one2one	0.0161256
ENSMUSG00000020086	H2afy2	H2AFY2	0.0072	0.5706	ortholog_one2one	0.0126183
ENSMUSG00000060743	H3f3a	H3F3A	0	0	ortholog_one2one	NA
ENSMUSG00000016559	H3f3b	H3F3B	0	0	ortholog_one2one	NA
ENSMUSG00000027018	Hat1	HAT1	0.0361	0.3086	ortholog_one2one	0.11698
ENSMUSG00000031352	Hccs	HCCS	0.0831	0.5267	ortholog_one2one	0.157775
ENSMUSG00000031386	Hcfc1	HCFC1	0.0314	0.6112	ortholog_one2one	0.0513743
ENSMUSG00000028800	Hdac1	HDAC1	0.0027	0.6099	ortholog_one2one	0.00442696
ENSMUSG00000019777	Hdac2	HDAC2	0.0018	0.5177	ortholog_one2one	0.00347692
ENSMUSG00000031161	Hdac6	HDAC6	0.1388	0.5061	ortholog_one2one	0.274254
ENSMUSG00000004897	Hdgf	HDGF	0.1499	0.5838	ortholog_one2one	0.256766
ENSMUSG00000025104	Hdgfl3	HDGFL3	0.011	0.2309	ortholog_one2one	0.0476397
ENSMUSG00000050244	Heatr1	HEATR1	0.0943	0.549	ortholog_one2one	0.171767
ENSMUSG00000000976	Heatr6	HEATR6	0.0967	0.5392	ortholog_one2one	0.17934
ENSMUSG00000039879	Heca	HECA	0.0204	0.7533	ortholog_one2one	0.0270808
ENSMUSG00000035247	Hectd1	HECTD1	0.0049	0.4069	ortholog_one2one	0.0120423
ENSMUSG00000041180	Hectd2	HECTD2	0.0532	0.3467	ortholog_one2one	0.153447
ENSMUSG00000025001	Hells	HELLS	0.0404	0.4682	ortholog_one2one	0.0862879
ENSMUSG00000045662	Henmt1	HENMT1	0.199	0.6959	ortholog_one2one	0.285961
ENSMUSG00000038664	Herc1	HERC1	0.0132	0.3334	ortholog_one2one	0.0395921
ENSMUSG00000031770	Herpud1	HERPUD1	0.0604	0.4557	ortholog_one2one	0.132543
ENSMUSG00000022528	Hes1	HES1	0.0098	0.3975	ortholog_one2one	0.0246541
ENSMUSG00000048878	Hexim1	HEXIM1	0.0735	0.494	ortholog_one2one	0.148785
ENSMUSG00000040289	Hey1	HEY1	0.0234	0.4185	ortholog_one2one	0.055914
ENSMUSG00000021109	Hif1a	HIF1A	0.0527	0.4407	ortholog_one2one	0.119582
ENSMUSG00000027177	Hipk3	HIPK3	0.0463	0.3764	ortholog_one2one	0.123007
ENSMUSG00000022702	Hira	HIRA	0.0201	0.4071	ortholog_one2one	0.0493736
ENSMUSG00000060081	Hist1h2aa	HIST1H2AA	0.0794	1.523	ortholog_one2one	0.0521339
ENSMUSG00000069265	Hist1h3a	HIST1H3A	0	0	ortholog_one2one	NA
ENSMUSG00000078851	Hist3h2a	HIST3H2A	0	0	ortholog_one2one	NA
ENSMUSG00000015501	Hivep2	HIVEP2	0.0629	0.5496	ortholog_one2one	0.114447
ENSMUSG00000044783	Hjurp	HJURP	0.473	0.7646	ortholog_one2one	0.618624
ENSMUSG00000002428	Hltf	HLTF	0.0883	0.5197	ortholog_one2one	0.169906
ENSMUSG00000032329	Hmg20a	HMG20A	0.0184	0.3838	ortholog_one2one	0.0479416
ENSMUSG00000054717	Hmgb2	HMGB2	0.0123	0.6542	ortholog_one2one	0.0188016
ENSMUSG00000021670	Hmgcr	HMGCR	0.0388	0.619	ortholog_one2one	0.0626817
ENSMUSG00000093930	Hmgcs1	HMGCS1	0.0287	0.4321	ortholog_one2one	0.0664198
ENSMUSG00000040681	Hmgn1	HMGN1	0.0986	1.6104	ortholog_one2one	0.061227
ENSMUSG00000031245	Hmgn5	HMGN5	0.3983	1.6336	ortholog_one2one	0.243817
ENSMUSG00000034518	Hmgxb4	HMGXB4	0.0641	0.5638	ortholog_one2one	0.113693
ENSMUSG00000005413	Hmox1	HMOX1	0.1002	0.9243	ortholog_one2one	0.108406
ENSMUSG00000007836	Hnrnpa0	HNRNPA0	0.0403	2.1333	ortholog_one2one	0.0188909
ENSMUSG00000020358	Hnrnpab	HNRNPAB	0.0287	0.4109	ortholog_one2one	0.0698467
ENSMUSG00000000568	Hnrnpd	HNRNPD	0.0197	0.1688	ortholog_one2one	0.116706
ENSMUSG00000029328	Hnrnpdl	HNRNPDL	0.0144	0.2545	ortholog_one2one	0.0565815
ENSMUSG00000042079	Hnrnpf	HNRNPF	0.0088	0.4117	ortholog_one2one	0.0213748
ENSMUSG00000007850	Hnrnph1	HNRNPH1	0.0257	0.2055	ortholog_one2one	0.125061
ENSMUSG00000045427	Hnrnph2	HNRNPH2	0.0041	0.2771	ortholog_one2one	0.0147961
ENSMUSG00000021546	Hnrnpk	HNRNPK	0	0	ortholog_one2one	NA
ENSMUSG00000015165	Hnrnpl	HNRNPL	0.0069	0.4325	ortholog_one2one	0.0159538
ENSMUSG00000024095	Hnrnpll	HNRNPLL	0.0201	0.393	ortholog_one2one	0.051145
ENSMUSG00000059208	Hnrnpm	HNRNPM	0.0116	0.2747	ortholog_one2one	0.0422279
ENSMUSG00000066037	Hnrnpr	HNRNPR	0.0014	0.2703	ortholog_one2one	0.00517943
ENSMUSG00000039630	Hnrnpu	HNRNPU	0.0149	0.3525	ortholog_one2one	0.0422695
ENSMUSG00000057156	Homez	HOMEZ	0.131	0.4817	ortholog_one2one	0.271953
ENSMUSG00000028572	Hook1	HOOK1	0.0372	0.6763	ortholog_one2one	0.0550052
ENSMUSG00000028759	Hp1bp3	HP1BP3	0.0557	0.4269	ortholog_one2one	0.130476
ENSMUSG00000025630	Hprt	HPRT1	0.0148	0.2736	ortholog_one2one	0.0540936
ENSMUSG00000031839	Hsbp1	HSBP1	0.0601	0.8654	ortholog_one2one	0.0694477
ENSMUSG00000024507	Hsd17b4	HSD17B4	0.0997	0.6285	ortholog_one2one	0.158632
ENSMUSG00000026675	Hsd17b7	HSD17B7	0.1446	0.5938	ortholog_one2one	0.243516
ENSMUSG00000019878	Hsf2	HSF2	0.024	0.3804	ortholog_one2one	0.0630915
ENSMUSG00000070345	Hsf5	HSF5	0.058	0.2798	ortholog_one2one	0.207291
ENSMUSG00000021270	Hsp90aa1	HSP90AA1	0.0036	0.6127	ortholog_one2one	0.00587563
ENSMUSG00000023944	Hsp90ab1	HSP90AB1	0.0018	0.7489	ortholog_one2one	0.00240353
ENSMUSG00000020048	Hsp90b1	HSP90B1	0.0137	0.5405	ortholog_one2one	0.0253469
ENSMUSG00000109865	Hspa14	HSPA14	0.0521	0.5975	ortholog_one2one	0.0871967
ENSMUSG00000020361	Hspa4	HSPA4	0.02	0.4267	ortholog_one2one	0.0468713
ENSMUSG00000025757	Hspa4l	HSPA4L	0.0403	0.5102	ortholog_one2one	0.0789886
ENSMUSG00000029657	Hsph1	HSPH1	0.0577	0.77	ortholog_one2one	0.0749351
ENSMUSG00000067873	Htatsf1	HTATSF1	0.1393	0.7517	ortholog_one2one	0.185313
ENSMUSG00000025261	Huwe1	HUWE1	0.0112	0.3068	ortholog_one2one	0.0365059
ENSMUSG00000032115	Hyou1	HYOU1	0.0393	0.5437	ortholog_one2one	0.0722825
ENSMUSG00000062054	Iah1	IAH1	0.0972	0.5307	ortholog_one2one	0.183154
ENSMUSG00000035941	Ibtk	IBTK	0.073	0.5671	ortholog_one2one	0.128725
ENSMUSG00000032235	Ice2	ICE2	0.1503	0.5812	ortholog_one2one	0.258603
ENSMUSG00000039662	Icmt	ICMT	0.022	0.5065	ortholog_one2one	0.0434353
ENSMUSG00000021379	Id4	ID4	0.0077	0.533	ortholog_one2one	0.0144465
ENSMUSG00000056999	Ide	IDE	0.0198	0.5068	ortholog_one2one	0.0390687
ENSMUSG00000025950	Idh1	IDH1	0.0252	0.4202	ortholog_one2one	0.0599714
ENSMUSG00000001627	Ifrd1	IFRD1	0.0251	0.3898	ortholog_one2one	0.064392
ENSMUSG00000027778	Ift80	IFT80	0.0279	0.571	ortholog_one2one	0.0488616
ENSMUSG00000005533	Igf1r	IGF1R	0.0201	0.6099	ortholog_one2one	0.0329562
ENSMUSG00000036256	Igfbp7	IGFBP7	0.0432	0.29	ortholog_one2one	0.148966
ENSMUSG00000022790	Igsf11	IGSF11	0.0581	0.4892	ortholog_one2one	0.118765
ENSMUSG00000042035	Igsf3	IGSF3	0.035	0.7538	ortholog_one2one	0.0464314
ENSMUSG00000038034	Igsf8	IGSF8	0.0642	0.4971	ortholog_one2one	0.129149
ENSMUSG00000024474	Ik	IK	0.0069	0.5851	ortholog_one2one	0.0117929
ENSMUSG00000021756	Il6st	IL6ST	0.1388	0.8009	ortholog_one2one	0.173305
ENSMUSG00000032178	Ilf3	ILF3	0.0321	0.6257	ortholog_one2one	0.0513025
ENSMUSG00000030890	Ilk	ILK	0.0021	0.3991	ortholog_one2one	0.00526184
ENSMUSG00000032288	Imp3	IMP3	0.0166	0.8107	ortholog_one2one	0.0204761
ENSMUSG00000026127	Imp4	IMP4	0.0095	0.7968	ortholog_one2one	0.0119227
ENSMUSG00000066324	Impad1	IMPAD1	0.0376	0.3869	ortholog_one2one	0.0971827
ENSMUSG00000026113	Inpp4a	INPP4A	0.0196	0.4903	ortholog_one2one	0.0399755
ENSMUSG00000025477	Inpp5a	INPP5A	0.0311	0.6832	ortholog_one2one	0.0455211
ENSMUSG00000042105	Inpp5f	INPP5F	0.0506	0.5234	ortholog_one2one	0.0966756
ENSMUSG00000032737	Inppl1	INPPL1	0.0213	0.5446	ortholog_one2one	0.0391113
ENSMUSG00000045294	Insig1	INSIG1	0.0893	0.6732	ortholog_one2one	0.13265
ENSMUSG00000031864	Ints10	INTS10	0.0227	0.6313	ortholog_one2one	0.0359575
ENSMUSG00000034263	Ints14	INTS14	0.0266	0.4252	ortholog_one2one	0.0625588
ENSMUSG00000037461	Ints7	INTS7	0.023	0.644	ortholog_one2one	0.0357143
ENSMUSG00000028344	Invs	INVS	0.1145	0.5981	ortholog_one2one	0.19144
ENSMUSG00000032594	Ip6k1	IP6K1	0.0144	0.4321	ortholog_one2one	0.0333256
ENSMUSG00000060733	Ipmk	IPMK	0.0911	0.8456	ortholog_one2one	0.107734
ENSMUSG00000030662	Ipo5	IPO5	0.0082	0.5034	ortholog_one2one	0.0162892
ENSMUSG00000022837	Iqcb1	IQCB1	0.066	0.3191	ortholog_one2one	0.206832
ENSMUSG00000051495	Irf2bp2	IRF2BP2	0.0813	0.5872	ortholog_one2one	0.138454
ENSMUSG00000034168	Irf2bpl	IRF2BPL	0.0138	0.654	ortholog_one2one	0.0211009
ENSMUSG00000026638	Irf6	IRF6	0.0108	0.5059	ortholog_one2one	0.0213481
ENSMUSG00000048039	Isg20l2	ISG20L2	0.1353	0.5395	ortholog_one2one	0.250788
ENSMUSG00000031729	Ist1	IST1	0.0231	0.3901	ortholog_one2one	0.0592156
ENSMUSG00000031703	Itfg1	ITFG1	0.0564	0.4785	ortholog_one2one	0.117868
ENSMUSG00000027111	Itga6	ITGA6	0.0341	0.6079	ortholog_one2one	0.0560948
ENSMUSG00000025809	Itgb1	ITGB1	0.0395	0.5797	ortholog_one2one	0.0681387
ENSMUSG00000022108	Itm2b	ITM2B	0.0217	0.8014	ortholog_one2one	0.0270776
ENSMUSG00000026223	Itm2c	ITM2C	0.0276	1.0135	ortholog_one2one	0.0272324
ENSMUSG00000074797	Itpa	ITPA	0.0474	0.7801	ortholog_one2one	0.0607614
ENSMUSG00000023150	Ivns1abp	IVNS1ABP	0.0133	0.2905	ortholog_one2one	0.0457831
ENSMUSG00000025764	Jade1	JADE1	0.033	0.375	ortholog_one2one	0.088
ENSMUSG00000020387	Jade2	JADE2	0.0471	0.5374	ortholog_one2one	0.0876442
ENSMUSG00000037315	Jade3	JADE3	0.1024	0.4296	ortholog_one2one	0.238361
ENSMUSG00000027276	Jag1	JAG1	0.0152	0.5407	ortholog_one2one	0.0281117
ENSMUSG00000028530	Jak1	JAK1	0.0257	0.4948	ortholog_one2one	0.0519402
ENSMUSG00000031990	Jam3	JAM3	0.0774	0.4677	ortholog_one2one	0.165491
ENSMUSG00000038518	Jarid2	JARID2	0.0337	0.3774	ortholog_one2one	0.0892952
ENSMUSG00000037876	Jmjd1c	JMJD1C	0.0703	0.4735	ortholog_one2one	0.148469
ENSMUSG00000021690	Jmy	JMY	0.0629	0.4651	ortholog_one2one	0.13524
ENSMUSG00000022426	Josd1	JOSD1	0.0138	0.4857	ortholog_one2one	0.0284126
ENSMUSG00000071076	Jund	JUND	0.0855	1.8638	ortholog_one2one	0.045874
ENSMUSG00000018412	Kansl1	KANSL1	0.0412	0.275	ortholog_one2one	0.149818
ENSMUSG00000022992	Kansl2	KANSL2	0.0229	0.4307	ortholog_one2one	0.0531693
ENSMUSG00000031540	Kat6a	KAT6A	0.0514	0.5246	ortholog_one2one	0.0979794
ENSMUSG00000021767	Kat6b	KAT6B	0.0482	0.405	ortholog_one2one	0.119012
ENSMUSG00000038909	Kat7	KAT7	0.0007	0.4243	ortholog_one2one	0.00164978
ENSMUSG00000040606	Kazn	KAZN	0.076	0.736	ortholog_one2one	0.103261
ENSMUSG00000018470	Kcnab3	KCNAB3	0.0346	0.4632	ortholog_one2one	0.0746978
ENSMUSG00000001098	Kctd10	KCTD10	0.0069	0.6993	ortholog_one2one	0.00986701
ENSMUSG00000054770	Kctd18	KCTD18	0.1056	0.4534	ortholog_one2one	0.232907
ENSMUSG00000005936	Kctd20	KCTD20	0.0482	0.6938	ortholog_one2one	0.0694725
ENSMUSG00000016946	Kctd5	KCTD5	0.0173	0.4176	ortholog_one2one	0.0414272
ENSMUSG00000021752	Kctd6	KCTD6	0.004	0.6039	ortholog_one2one	0.00662361
ENSMUSG00000036940	Kdm1a	KDM1A	0.0118	0.4298	ortholog_one2one	0.0274546
ENSMUSG00000038080	Kdm1b	KDM1B	0.0563	0.5726	ortholog_one2one	0.0983234
ENSMUSG00000038773	Kdm3b	KDM3B	0.0317	0.3648	ortholog_one2one	0.0868969
ENSMUSG00000030180	Kdm5a	KDM5A	0.0162	0.3426	ortholog_one2one	0.0472855
ENSMUSG00000042207	Kdm5b	KDM5B	0.0289	0.4447	ortholog_one2one	0.0649876
ENSMUSG00000028790	Khdrbs1	KHDRBS1	0.0274	0.3367	ortholog_one2one	0.0813781
ENSMUSG00000022332	Khdrbs3	KHDRBS3	0.0137	0.497	ortholog_one2one	0.0275654
ENSMUSG00000036333	Kidins220	KIDINS220	0.0297	0.6302	ortholog_one2one	0.0471279
ENSMUSG00000012443	Kif11	KIF11	0.114	0.5437	ortholog_one2one	0.209674
ENSMUSG00000036955	Kif1bp	KIF1BP	0.0411	0.7086	ortholog_one2one	0.0580017
ENSMUSG00000020821	Kif1c	KIF1C	0.0303	0.5311	ortholog_one2one	0.0570514
ENSMUSG00000021294	Kif26a	KIF26A	0.126	0.966	ortholog_one2one	0.130435
ENSMUSG00000028678	Kif2c	KIF2C	0.0636	0.4326	ortholog_one2one	0.147018
ENSMUSG00000026764	Kif5c	KIF5C	0.0075	0.6183	ortholog_one2one	0.01213
ENSMUSG00000037262	Kin	KIN	0.0396	0.6688	ortholog_one2one	0.0592105
ENSMUSG00000005672	Kit	KIT	0.1037	0.6263	ortholog_one2one	0.165576
ENSMUSG00000037465	Klf10	KLF10	0.0869	0.5034	ortholog_one2one	0.172626
ENSMUSG00000020653	Klf11	KLF11	0.1452	0.5088	ortholog_one2one	0.285377
ENSMUSG00000041649	Klf8	KLF8	0.0842	0.3884	ortholog_one2one	0.216787
ENSMUSG00000048732	Klhl11	KLHL11	0.0164	0.4871	ortholog_one2one	0.0336687
ENSMUSG00000026455	Klhl12	KLHL12	0.0034	0.403	ortholog_one2one	0.00843672
ENSMUSG00000073700	Klhl21	KLHL21	0.0155	1.2152	ortholog_one2one	0.0127551
ENSMUSG00000062901	Klhl24	KLHL24	0.003	0.403	ortholog_one2one	0.00744417
ENSMUSG00000070923	Klhl9	KLHL9	0.0058	0.4435	ortholog_one2one	0.0130778
ENSMUSG00000038056	Kmt2c	KMT2C	0.0781	0.423	ortholog_one2one	0.184634
ENSMUSG00000048154	Kmt2d	KMT2D	NA	NA	ortholog_one2one	NA
ENSMUSG00000030980	Knop1	KNOP1	0.2579	1.2238	ortholog_one2one	0.210737
ENSMUSG00000022905	Kpna1	KPNA1	0.0103	0.3045	ortholog_one2one	0.0338259
ENSMUSG00000021929	Kpna3	KPNA3	0.0036	0.2834	ortholog_one2one	0.0127029
ENSMUSG00000027782	Kpna4	KPNA4	0.0051	0.2255	ortholog_one2one	0.0226164
ENSMUSG00000001440	Kpnb1	KPNB1	0.0039	0.3466	ortholog_one2one	0.0112522
ENSMUSG00000030265	Kras	KRAS	0.0732	0.4995	ortholog_one2one	0.146547
ENSMUSG00000063334	Krr1	KRR1	0.0479	0.7991	ortholog_one2one	0.0599424
ENSMUSG00000002900	Lamb1	LAMB1	0.0357	0.6395	ortholog_one2one	0.0558249
ENSMUSG00000031447	Lamp1	LAMP1	0.2278	0.764	ortholog_one2one	0.298168
ENSMUSG00000016534	Lamp2	LAMP2	0.2272	0.3939	ortholog_one2one	0.576796
ENSMUSG00000030842	Lamtor1	LAMTOR1	0.0142	0.4184	ortholog_one2one	0.0339388
ENSMUSG00000020585	Laptm4a	LAPTM4A	0.0124	0.316	ortholog_one2one	0.0392405
ENSMUSG00000037331	Larp1	LARP1	0.0652	0.4943	ortholog_one2one	0.131904
ENSMUSG00000023025	Larp4	LARP4	0.0794	0.4372	ortholog_one2one	0.18161
ENSMUSG00000033499	Larp4b	LARP4B	0.0637	0.4141	ortholog_one2one	0.153828
ENSMUSG00000035202	Lars2	LARS2	0.0726	0.5387	ortholog_one2one	0.134769
ENSMUSG00000004880	Lbr	LBR	0.1149	0.7534	ortholog_one2one	0.152509
ENSMUSG00000032258	Lca5	LCA5	0.1898	0.8596	ortholog_one2one	0.2208
ENSMUSG00000015882	Lcorl	LCORL	0.0212	0.1153	ortholog_one2one	0.183868
ENSMUSG00000025223	Ldb1	LDB1	0.001	0.3486	ortholog_one2one	0.00286862
ENSMUSG00000027985	Lef1	LEF1	0.0105	0.3757	ortholog_one2one	0.0279478
ENSMUSG00000048661	Lemd3	LEMD3	0.0759	0.4354	ortholog_one2one	0.174322
ENSMUSG00000031513	Leprotl1	LEPROTL1	0.1951	0.734	ortholog_one2one	0.265804
ENSMUSG00000021190	Lgmn	LGMN	0.0969	0.8783	ortholog_one2one	0.110327
ENSMUSG00000054263	Lifr	LIFR	0.1485	0.7601	ortholog_one2one	0.195369
ENSMUSG00000020697	Lig3	LIG3	0.0619	0.4031	ortholog_one2one	0.15356
ENSMUSG00000023022	Lima1	LIMA1	0.1413	0.6441	ortholog_one2one	0.219376
ENSMUSG00000029674	Limk1	LIMK1	0.0217	0.8545	ortholog_one2one	0.025395
ENSMUSG00000050966	Lin28a	LIN28A	0.0167	0.4756	ortholog_one2one	0.0351135
ENSMUSG00000063804	Lin28b	LIN28B	0.0741	0.4447	ortholog_one2one	0.166629
ENSMUSG00000027162	Lin7c	LIN7C	0	0	ortholog_one2one	NA
ENSMUSG00000058729	Lin9	LIN9	0.014	0.4696	ortholog_one2one	0.0298126
ENSMUSG00000024781	Lipa	LIPA	0.1532	0.6357	ortholog_one2one	0.240994
ENSMUSG00000020536	Llgl1	LLGL1	0.0532	0.7354	ortholog_one2one	0.0723416
ENSMUSG00000041891	Lman1	LMAN1	0.0571	0.5696	ortholog_one2one	0.100246
ENSMUSG00000021484	Lman2	LMAN2	0.0235	0.8264	ortholog_one2one	0.0284366
ENSMUSG00000073725	Lmbrd1	LMBRD1	0.0363	0.6983	ortholog_one2one	0.0519834
ENSMUSG00000024590	Lmnb1	LMNB1	0.0187	0.6334	ortholog_one2one	0.0295232
ENSMUSG00000023845	Lnpep	LNPEP	0.0672	0.4223	ortholog_one2one	0.159129
ENSMUSG00000016520	Lnx2	LNX2	0.0568	1.1147	ortholog_one2one	0.0509554
ENSMUSG00000016239	Lonrf3	LONRF3	0.1094	0.468	ortholog_one2one	0.233761
ENSMUSG00000031861	Lpar2	LPAR2	0.0427	0.8172	ortholog_one2one	0.0522516
ENSMUSG00000004270	Lpcat3	LPCAT3	0.0702	0.3931	ortholog_one2one	0.178581
ENSMUSG00000024052	Lpin2	LPIN2	0.056	0.5399	ortholog_one2one	0.103723
ENSMUSG00000028080	Lrba	LRBA	0.0503	0.4248	ortholog_one2one	0.118409
ENSMUSG00000030029	Lrig1	LRIG1	0.0904	0.6009	ortholog_one2one	0.150441
ENSMUSG00000019796	Lrp11	LRP11	0.1843	0.7605	ortholog_one2one	0.242341
ENSMUSG00000032352	Lrrc1	LRRC1	0.0372	0.4091	ortholog_one2one	0.0909313
ENSMUSG00000063052	Lrrc40	LRRC40	0.0996	0.6275	ortholog_one2one	0.158725
ENSMUSG00000028617	Lrrc42	LRRC42	0.0674	0.5597	ortholog_one2one	0.120422
ENSMUSG00000029028	Lrrc47	LRRC47	0.0643	0.9905	ortholog_one2one	0.0649167
ENSMUSG00000034158	Lrrc58	LRRC58	0.0368	0.396	ortholog_one2one	0.0929293
ENSMUSG00000037296	Lsm1	LSM1	0.0114	0.3954	ortholog_one2one	0.0288316
ENSMUSG00000066568	Lsm14a	LSM14A	0.0341	0.3805	ortholog_one2one	0.0896189
ENSMUSG00000039108	Lsm14b	LSM14B	0.0257	0.4761	ortholog_one2one	0.0539803
ENSMUSG00000007050	Lsm2	LSM2	0.0048	0.41	ortholog_one2one	0.0117073
ENSMUSG00000034192	Lsm3	LSM3	0	0	ortholog_one2one	NA
ENSMUSG00000031848	Lsm4	LSM4	0.0124	0.9228	ortholog_one2one	0.0134374
ENSMUSG00000031683	Lsm6	LSM6	0	0	ortholog_one2one	NA
ENSMUSG00000044155	Lsm8	LSM8	0	0	ortholog_one2one	NA
ENSMUSG00000019814	Ltv1	LTV1	0.0859	0.6271	ortholog_one2one	0.13698
ENSMUSG00000024188	Luc7l	LUC7L	0.0147	0.4149	ortholog_one2one	0.0354302
ENSMUSG00000020863	Luc7l3	LUC7L3	0.0206	0.4091	ortholog_one2one	0.0503544
ENSMUSG00000067367	Lyar	LYAR	0.1839	1.5305	ortholog_one2one	0.120157
ENSMUSG00000025903	Lypla1	LYPLA1	0.0421	0.4416	ortholog_one2one	0.0953351
ENSMUSG00000028670	Lypla2	LYPLA2	0.0061	0.2908	ortholog_one2one	0.0209766
ENSMUSG00000035342	Lzts2	LZTS2	0.0369	0.5508	ortholog_one2one	0.0669935
ENSMUSG00000007458	M6pr	M6PR	0.0391	0.4681	ortholog_one2one	0.0835292
ENSMUSG00000028649	Macf1	MACF1	0.0396	0.4247	ortholog_one2one	0.0932423
ENSMUSG00000079562	Maea	MAEA	0.0055	0.917	ortholog_one2one	0.00599782
ENSMUSG00000022553	Maf1	MAF1	0.024	0.8301	ortholog_one2one	0.0289122
ENSMUSG00000051510	Mafg	MAFG	0.005	0.9032	ortholog_one2one	0.00553587
ENSMUSG00000046942	Mageb16	MAGEB16	0.4034	1.0732	ortholog_one2one	0.375885
ENSMUSG00000035427	Mageb4	MAGEB2	0.3403	0.5374	ortholog_one2one	0.633234
ENSMUSG00000025151	Maged1	MAGED1	0.0614	0.3219	ortholog_one2one	0.190742
ENSMUSG00000024085	Man2a1	MAN2A1	0.1161	0.631	ortholog_one2one	0.183994
ENSMUSG00000021754	Map3k1	MAP3K1	0.0532	0.5425	ortholog_one2one	0.0980645
ENSMUSG00000023050	Map3k12	MAP3K12	0.0205	0.3566	ortholog_one2one	0.0574874
ENSMUSG00000031303	Map3k15	MAP3K15	0.0706	0.5214	ortholog_one2one	0.135405
ENSMUSG00000014426	Map3k4	MAP3K4	0.0577	0.7618	ortholog_one2one	0.0757417
ENSMUSG00000071369	Map3k5	MAP3K5	0.0279	0.6245	ortholog_one2one	0.0446757
ENSMUSG00000032479	Map4	MAP4	0.2761	0.3997	ortholog_one2one	0.690768
ENSMUSG00000024242	Map4k3	MAP4K3	0.0193	0.5128	ortholog_one2one	0.0376365
ENSMUSG00000026074	Map4k4	MAP4K4	0.0085	0.4762	ortholog_one2one	0.0178496
ENSMUSG00000041020	Map7d2	MAP7D2	0.1407	0.5697	ortholog_one2one	0.246972
ENSMUSG00000063358	Mapk1	MAPK1	0.0053	0.3202	ortholog_one2one	0.0165522
ENSMUSG00000053436	Mapk14	MAPK14	0.0025	0.5522	ortholog_one2one	0.00452735
ENSMUSG00000042688	Mapk6	MAPK6	0.0255	0.5472	ortholog_one2one	0.0466009
ENSMUSG00000021936	Mapk8	MAPK8	0.0042	0.2694	ortholog_one2one	0.0155902
ENSMUSG00000027479	Mapre1	MAPRE1	0.0164	0.3311	ortholog_one2one	0.0495319
ENSMUSG00000023307	March5	2019-03-05	0	0	ortholog_one2one	NA
ENSMUSG00000039100	March6	2019-03-06	0.0108	0.3987	ortholog_one2one	0.027088
ENSMUSG00000026977	March7	2019-03-07	0.0662	0.4221	ortholog_one2one	0.156835
ENSMUSG00000025702	March8	2019-03-08	0.0356	0.3991	ortholog_one2one	0.0892007
ENSMUSG00000047945	Marcksl1	MARCKSL1	0.0203	0.215	ortholog_one2one	0.0944186
ENSMUSG00000060657	Marf1	MARF1	0.077	0.4803	ortholog_one2one	0.160316
ENSMUSG00000026620	Mark1	MARK1	0.0288	0.6168	ortholog_one2one	0.0466926
ENSMUSG00000024969	Mark2	MARK2	0.0076	0.325	ortholog_one2one	0.0233846
ENSMUSG00000007411	Mark3	MARK3	0.0143	0.4648	ortholog_one2one	0.0307659
ENSMUSG00000021636	Marveld2	MARVELD2	0.0707	0.5329	ortholog_one2one	0.13267
ENSMUSG00000042032	Mat2b	MAT2B	0.0297	0.4781	ortholog_one2one	0.0621209
ENSMUSG00000051065	Mb21d2	MB21D2	0.0064	0.6145	ortholog_one2one	0.010415
ENSMUSG00000024513	Mbd2	MBD2	0.0129	0.2788	ortholog_one2one	0.0462697
ENSMUSG00000027763	Mbnl1	MBNL1	0.0014	0.1909	ortholog_one2one	0.00733368
ENSMUSG00000022139	Mbnl2	MBNL2	0.0829	0.3891	ortholog_one2one	0.213056
ENSMUSG00000035596	Mboat7	MBOAT7	0.0342	0.5882	ortholog_one2one	0.0581435
ENSMUSG00000032135	Mcam	MCAM	0.1382	0.6188	ortholog_one2one	0.223335
ENSMUSG00000002870	Mcm2	MCM2	0.0188	0.9572	ortholog_one2one	0.0196406
ENSMUSG00000041859	Mcm3	MCM3	0.0347	0.56	ortholog_one2one	0.0619643
ENSMUSG00000022673	Mcm4	MCM4	0.0254	0.522	ortholog_one2one	0.048659
ENSMUSG00000048170	Mcmbp	MCMBP	0.0356	0.716	ortholog_one2one	0.0497207
ENSMUSG00000020184	Mdm2	MDM2	0.0881	0.7805	ortholog_one2one	0.112876
ENSMUSG00000054387	Mdm4	MDM4	0.0899	0.468	ortholog_one2one	0.192094
ENSMUSG00000058006	Mdn1	MDN1	0.1023	0.4701	ortholog_one2one	0.217613
ENSMUSG00000021598	Med10	MED10	0.0033	0.6416	ortholog_one2one	0.00514339
ENSMUSG00000018076	Med13l	MED13L	0.0379	0.4681	ortholog_one2one	0.0809656
ENSMUSG00000027080	Med19	MED19	0.0269	0.5447	ortholog_one2one	0.049385
ENSMUSG00000030291	Med21	MED21	0.0099	0.3056	ortholog_one2one	0.0323953
ENSMUSG00000019984	Med23	MED23	0.0188	0.5643	ortholog_one2one	0.0333156
ENSMUSG00000017210	Med24	MED24	0.0284	0.6328	ortholog_one2one	0.0448799
ENSMUSG00000015804	Med28	MED28	0.0232	0.6294	ortholog_one2one	0.0368605
ENSMUSG00000020801	Med31	MED31	0.0109	0.3589	ortholog_one2one	0.0303706
ENSMUSG00000020397	Med7	MED7	0.014	0.4217	ortholog_one2one	0.033199
ENSMUSG00000024947	Men1	MEN1	0.0178	0.6482	ortholog_one2one	0.0274607
ENSMUSG00000036112	Metap2	METAP2	0.0272	0.5008	ortholog_one2one	0.0543131
ENSMUSG00000041975	Mettl8	METTL8	0.1518	0.4938	ortholog_one2one	0.307412
ENSMUSG00000037253	Mex3c	MEX3C	0.022	0.2612	ortholog_one2one	0.0842266
ENSMUSG00000048696	Mex3d	MEX3D	0.1293	1.7156	ortholog_one2one	0.0753672
ENSMUSG00000027668	Mfn1	MFN1	0.0469	0.5668	ortholog_one2one	0.0827452
ENSMUSG00000033943	Mga	MGA	0.0935	0.3444	ortholog_one2one	0.271487
ENSMUSG00000027424	Mgme1	MGME1	0.1823	0.4717	ortholog_one2one	0.386474
ENSMUSG00000051586	Mical3	MICAL3	0.0691	0.7404	ortholog_one2one	0.0933279
ENSMUSG00000035621	Midn	MIDN	0.0281	1.2797	ortholog_one2one	0.0219583
ENSMUSG00000028522	Mier1	MIER1	0.051	0.6095	ortholog_one2one	0.0836751
ENSMUSG00000032727	Mier3	MIER3	0.0332	0.5587	ortholog_one2one	0.0594237
ENSMUSG00000033307	Mif	MIF	NA	NA	ortholog_one2one	NA
ENSMUSG00000020743	Mif4gd	MIF4GD	0.0325	0.3929	ortholog_one2one	0.0827182
ENSMUSG00000024896	Minpp1	MINPP1	0.0965	0.6639	ortholog_one2one	0.145353
ENSMUSG00000022978	Mis18a	MIS18A	0.1346	0.7773	ortholog_one2one	0.173164
ENSMUSG00000047534	Mis18bp1	MIS18BP1	0.301	0.5809	ortholog_one2one	0.518161
ENSMUSG00000020190	Mknk2	MKNK2	0.0322	0.9249	ortholog_one2one	0.0348146
ENSMUSG00000048416	Mlf1	MLF1	0.1383	0.5572	ortholog_one2one	0.248205
ENSMUSG00000026743	Mllt10	MLLT10	0.033	0.3418	ortholog_one2one	0.0965477
ENSMUSG00000038437	Mllt6	MLLT6	0.0389	0.4649	ortholog_one2one	0.0836739
ENSMUSG00000043131	Mob1a	MOB1A	0	0	ortholog_one2one	NA
ENSMUSG00000006262	Mob1b	MOB1B	0.017	0.4946	ortholog_one2one	0.0343712
ENSMUSG00000025147	Mob2	MOB2	0.0534	0.9422	ortholog_one2one	0.0566759
ENSMUSG00000025979	Mob4	MOB4	0	0	ortholog_one2one	NA
ENSMUSG00000039456	Morc3	MORC3	0.0923	0.7062	ortholog_one2one	0.1307
ENSMUSG00000031422	Morf4l2	MORF4L2	0.0219	0.671	ortholog_one2one	0.0326379
ENSMUSG00000028402	Mpdz	MPDZ	0.0906	0.5864	ortholog_one2one	0.154502
ENSMUSG00000031843	Mphosph6	MPHOSPH6	0.0668	1.4883	ortholog_one2one	0.0448834
ENSMUSG00000079184	Mphosph8	MPHOSPH8	0.1442	0.7584	ortholog_one2one	0.190137
ENSMUSG00000021112	Mpp5	MPP5	0.015	0.3856	ortholog_one2one	0.0389004
ENSMUSG00000026566	Mpzl1	MPZL1	0.0914	0.4395	ortholog_one2one	0.207964
ENSMUSG00000027569	Mrgbp	MRGBP	0.0173	0.4656	ortholog_one2one	0.0371564
ENSMUSG00000030879	Mrpl17	MRPL17	0.0915	0.4858	ortholog_one2one	0.188349
ENSMUSG00000032563	Mrpl3	MRPL3	0.1085	0.5025	ortholog_one2one	0.21592
ENSMUSG00000026248	Mrpl44	MRPL44	0.0853	0.6664	ortholog_one2one	0.128001
ENSMUSG00000044018	Mrpl50	MRPL50	0.1515	0.5596	ortholog_one2one	0.270729
ENSMUSG00000049960	Mrps16	MRPS16	0.0423	0.732	ortholog_one2one	0.0577869
ENSMUSG00000023723	Mrps23	MRPS23	0.1563	0.6691	ortholog_one2one	0.233597
ENSMUSG00000060679	Mrps9	MRPS9	0.1299	0.6238	ortholog_one2one	0.20824
ENSMUSG00000042138	Msantd2	MSANTD2	0.0137	0.2358	ortholog_one2one	0.0581001
ENSMUSG00000039693	Msantd3	MSANTD3	0.0191	0.9983	ortholog_one2one	0.0191325
ENSMUSG00000041124	Msantd4	MSANTD4	0.0214	1.1538	ortholog_one2one	0.0185474
ENSMUSG00000054256	Msi1	MSI1	0.0025	0.3584	ortholog_one2one	0.00697545
ENSMUSG00000069769	Msi2	MSI2	0.0014	0.1874	ortholog_one2one	0.00747065
ENSMUSG00000031765	Mt1	MT1F	0.1172	7.6799	ortholog_one2one	0.0152606
ENSMUSG00000031762	Mt2	MT1M	0.1435	3.0343	ortholog_one2one	0.0472926
ENSMUSG00000021144	Mta1	MTA1	0.0158	0.5949	ortholog_one2one	0.0265591
ENSMUSG00000055817	Mta3	MTA3	0.0351	0.6311	ortholog_one2one	0.0556172
ENSMUSG00000028890	Mtf1	MTF1	0.0396	0.2606	ortholog_one2one	0.151957
ENSMUSG00000029267	Mtf2	MTF2	0.0105	0.1711	ortholog_one2one	0.0613676
ENSMUSG00000005667	Mthfd2	MTHFD2	0.0433	0.6223	ortholog_one2one	0.0695806
ENSMUSG00000034354	Mtmr3	MTMR3	0.0696	0.4065	ortholog_one2one	0.171218
ENSMUSG00000021987	Mtmr6	MTMR6	0.0478	0.6121	ortholog_one2one	0.0780918
ENSMUSG00000029840	Mtpn	MTPN	0.0043	0.0748	ortholog_one2one	0.0574866
ENSMUSG00000021311	Mtr	MTR	0.0422	0.4376	ortholog_one2one	0.0964351
ENSMUSG00000022353	Mtss1	MTSS1	0.0171	0.4588	ortholog_one2one	0.0372711
ENSMUSG00000027099	Mtx2	MTX2	0.0158	0.334	ortholog_one2one	0.0473054
ENSMUSG00000033004	Mycbp2	MYCBP2	0.0134	0.478	ortholog_one2one	0.0280335
ENSMUSG00000028654	Mycl	MYCL	0.0522	0.6084	ortholog_one2one	0.0857988
ENSMUSG00000024048	Myl12a	MYL12A	0.0078	1.3541	ortholog_one2one	0.00576028
ENSMUSG00000037730	Mynn	MYNN	0.0417	0.4823	ortholog_one2one	0.0864607
ENSMUSG00000022272	Myo10	MYO10	0.025	0.7884	ortholog_one2one	0.0317098
ENSMUSG00000018417	Myo1b	MYO1B	0.0103	0.5375	ortholog_one2one	0.0191628
ENSMUSG00000066952	Myo1h	MYO1H	0.0653	0.8472	ortholog_one2one	0.0770774
ENSMUSG00000039585	Myo9a	MYO9A	0.0543	0.3765	ortholog_one2one	0.144223
ENSMUSG00000033186	Mzt1	MZT1	0.0916	0.5151	ortholog_one2one	0.17783
ENSMUSG00000031652	N4bp1	N4BP1	0.1031	0.5222	ortholog_one2one	0.197434
ENSMUSG00000063273	Naa15	NAA15	0.0073	0.325	ortholog_one2one	0.0224615
ENSMUSG00000036282	Naa30	NAA30	0.0702	0.2868	ortholog_one2one	0.24477
ENSMUSG00000021555	Naa35	NAA35	0.0122	0.5832	ortholog_one2one	0.0209191
ENSMUSG00000024764	Naa40	NAA40	0.0054	0.5073	ortholog_one2one	0.0106446
ENSMUSG00000022698	Naa50	NAA50	0.0083	0.3294	ortholog_one2one	0.0251973
ENSMUSG00000002881	Nab1	NAB1	0.0339	0.539	ortholog_one2one	0.0628942
ENSMUSG00000025402	Nab2	NAB2	0.023	0.4521	ortholog_one2one	0.0508737
ENSMUSG00000026107	Nabp1	NABP1	0.081	0.293	ortholog_one2one	0.276451
ENSMUSG00000029063	Nadk	NADK	0.0379	0.904	ortholog_one2one	0.0419248
ENSMUSG00000031878	Nae1	NAE1	0.0149	0.3229	ortholog_one2one	0.0461443
ENSMUSG00000020572	Nampt	NAMPT	0.0198	0.3621	ortholog_one2one	0.054681
ENSMUSG00000058799	Nap1l1	NAP1L1	0.0079	0.3652	ortholog_one2one	0.021632
ENSMUSG00000059119	Nap1l4	NAP1L4	0.0272	0.9623	ortholog_one2one	0.0282656
ENSMUSG00000018995	Nars2	NARS2	0.0811	0.4726	ortholog_one2one	0.171604
ENSMUSG00000028693	Nasp	NASP	0.1069	0.3299	ortholog_one2one	0.324038
ENSMUSG00000017119	Nbr1	NBR1	0.0835	0.3365	ortholog_one2one	0.248143
ENSMUSG00000035024	Ncapd3	NCAPD3	0.1554	0.572	ortholog_one2one	0.271678
ENSMUSG00000042029	Ncapg2	NCAPG2	0.1133	0.5291	ortholog_one2one	0.214137
ENSMUSG00000028330	Ncbp1	NCBP1	0.0094	0.5225	ortholog_one2one	0.0179904
ENSMUSG00000022774	Ncbp2	NCBP2	0.0087	0.4626	ortholog_one2one	0.0188067
ENSMUSG00000028833	Ncdn	NCDN	0.0091	0.4514	ortholog_one2one	0.0201595
ENSMUSG00000032475	Nck1	NCK1	0.0048	0.3484	ortholog_one2one	0.0137773
ENSMUSG00000066877	Nck2	NCK2	NA	NA	ortholog_one2one	NA
ENSMUSG00000026234	Ncl	NCL	0.0828	0.4763	ortholog_one2one	0.17384
ENSMUSG00000005886	Ncoa2	NCOA2	0.0278	0.3771	ortholog_one2one	0.0737205
ENSMUSG00000038369	Ncoa6	NCOA6	0.0466	0.2413	ortholog_one2one	0.193121
ENSMUSG00000003458	Ncstn	NCSTN	0.0599	0.4482	ortholog_one2one	0.133646
ENSMUSG00000018736	Ndel1	NDEL1	0.0192	0.3462	ortholog_one2one	0.0554593
ENSMUSG00000024425	Ndfip1	NDFIP1	0.0129	0.2591	ortholog_one2one	0.0497877
ENSMUSG00000036564	Ndrg4	NDRG4	0.0119	0.5683	ortholog_one2one	0.0209396
ENSMUSG00000022450	Ndufa6	NDUFA6	0.0853	0.4486	ortholog_one2one	0.190147
ENSMUSG00000028261	Ndufaf4	NDUFAF4	0.1743	0.5397	ortholog_one2one	0.322957
ENSMUSG00000022820	Ndufb4	NDUFB4	0.179	0.563	ortholog_one2one	0.31794
ENSMUSG00000022354	Ndufb9	NDUFB9	0.0802	0.4361	ortholog_one2one	0.183903
ENSMUSG00000025968	Ndufs1	NDUFS1	0.0279	0.3607	ortholog_one2one	0.0773496
ENSMUSG00000030327	Necap1	NECAP1	0.0351	0.3618	ortholog_one2one	0.0970149
ENSMUSG00000022656	Nectin3	NECTIN3	0.0326	0.3381	ortholog_one2one	0.0964212
ENSMUSG00000032216	Nedd4	NEDD4	0.166	0.887	ortholog_one2one	0.187148
ENSMUSG00000010376	Nedd8	NEDD8	0.0056	0.3759	ortholog_one2one	0.0148976
ENSMUSG00000035121	Neil2	NEIL2	0.1732	0.5743	ortholog_one2one	0.301585
ENSMUSG00000031644	Nek1	NEK1	0.0906	0.4755	ortholog_one2one	0.190536
ENSMUSG00000026393	Nek7	NEK7	0.0108	0.3942	ortholog_one2one	0.0273973
ENSMUSG00000034290	Nek9	NEK9	0.0219	0.371	ortholog_one2one	0.0590296
ENSMUSG00000029111	Nelfa	NELFA	0.0212	1.276	ortholog_one2one	0.0166144
ENSMUSG00000013465	Nelfb	NELFB	0.0284	1.4279	ortholog_one2one	0.0198893
ENSMUSG00000003847	Nfat5	NFAT5	0.0376	0.2958	ortholog_one2one	0.127113
ENSMUSG00000030722	Nfatc2ip	NFATC2IP	0.1979	0.5822	ortholog_one2one	0.339918
ENSMUSG00000031902	Nfatc3	NFATC3	0.0584	0.3199	ortholog_one2one	0.182557
ENSMUSG00000038615	Nfe2l1	NFE2L1	0.0121	0.4272	ortholog_one2one	0.028324
ENSMUSG00000072889	Nfxl1	NFXL1	0.0517	0.4735	ortholog_one2one	0.109187
ENSMUSG00000023994	Nfya	NFYA	0.0014	0.4016	ortholog_one2one	0.00348606
ENSMUSG00000020248	Nfyb	NFYB	0.0045	0.7971	ortholog_one2one	0.00564546
ENSMUSG00000005397	Nid1	NID1	0.0805	0.6214	ortholog_one2one	0.129546
ENSMUSG00000026036	Nif3l1	NIF3L1	0.0954	0.3999	ortholog_one2one	0.23856
ENSMUSG00000026377	Nifk	NIFK	0.3262	1.0268	ortholog_one2one	0.317686
ENSMUSG00000068115	Ninl	NINL	0.2635	0.9252	ortholog_one2one	0.284803
ENSMUSG00000031917	Nip7	NIP7	0.0099	0.8366	ortholog_one2one	0.0118336
ENSMUSG00000047037	Nipa1	NIPA1	0.0072	0.514	ortholog_one2one	0.0140078
ENSMUSG00000030452	Nipa2	NIPA2	0.0224	0.3853	ortholog_one2one	0.0581365
ENSMUSG00000022141	Nipbl	NIPBL	0.0146	0.338	ortholog_one2one	0.0431953
ENSMUSG00000021910	Nisch	NISCH	0.0563	0.7582	ortholog_one2one	0.0742548
ENSMUSG00000021772	Nkiras1	NKIRAS1	0.0231	0.6859	ortholog_one2one	0.0336784
ENSMUSG00000044149	Nkrf	NKRF	0.0255	0.3653	ortholog_one2one	0.0698056
ENSMUSG00000032525	Nktr	NKTR	0.1224	0.6217	ortholog_one2one	0.19688
ENSMUSG00000022061	Nkx3-1	NKX3-1	0.2115	0.9761	ortholog_one2one	0.216679
ENSMUSG00000037601	Nme1	NME1	0.0295	0.716	ortholog_one2one	0.0412011
ENSMUSG00000026643	Nmt2	NMT2	0.0203	0.5069	ortholog_one2one	0.0400473
ENSMUSG00000095567	Noc2l	NOC2L	0.1546	1.1865	ortholog_one2one	0.130299
ENSMUSG00000024999	Noc3l	NOC3L	0.0515	0.6174	ortholog_one2one	0.0834143
ENSMUSG00000033294	Noc4l	NOC4L	NA	NA	ortholog_one2one	NA
ENSMUSG00000023087	Noct	NOCT	0.0479	0.6944	ortholog_one2one	0.0689804
ENSMUSG00000014776	Nol3	NOL3	0.0865	1.0587	ortholog_one2one	0.081704
ENSMUSG00000063200	Nol7	NOL7	0.1295	0.5105	ortholog_one2one	0.253673
ENSMUSG00000027878	Notch2	NOTCH2	0.0377	0.5777	ortholog_one2one	0.0652588
ENSMUSG00000033054	Npat	NPAT	0.15	0.5234	ortholog_one2one	0.286588
ENSMUSG00000024413	Npc1	NPC1	0.0819	0.6473	ortholog_one2one	0.126526
ENSMUSG00000039703	Nploc4	NPLOC4	0.0137	0.5657	ortholog_one2one	0.0242178
ENSMUSG00000057113	Npm1	NPM1	0.0216	0.4356	ortholog_one2one	0.0495868
ENSMUSG00000032336	Nptn	NPTN	0.0994	0.4937	ortholog_one2one	0.201337
ENSMUSG00000020889	Nr1d1	NR1D1	0.0207	0.4783	ortholog_one2one	0.0432783
ENSMUSG00000021775	Nr1d2	NR1D2	0.0404	0.4492	ortholog_one2one	0.0899377
ENSMUSG00000027852	Nras	NRAS	0.0024	0.4173	ortholog_one2one	0.00575126
ENSMUSG00000029148	Nrbp1	NRBP1	0.0078	0.2607	ortholog_one2one	0.0299194
ENSMUSG00000042834	Nrep	NREP	0.1875	0.3735	ortholog_one2one	0.502008
ENSMUSG00000057406	Nsd2	NSD2	0.0479	0.5043	ortholog_one2one	0.0949831
ENSMUSG00000034187	Nsf	NSF	0.0089	0.5455	ortholog_one2one	0.0163153
ENSMUSG00000028245	Nsmaf	NSMAF	0.0544	0.5271	ortholog_one2one	0.103206
ENSMUSG00000037958	Nsrp1	NSRP1	0.1554	0.5854	ortholog_one2one	0.26546
ENSMUSG00000025041	Nt5c2	NT5C2	0.0024	0.4374	ortholog_one2one	0.00548697
ENSMUSG00000028954	Nub1	NUB1	0.0784	0.7944	ortholog_one2one	0.0986908
ENSMUSG00000026434	Nucks1	NUCKS1	0.0209	0.4281	ortholog_one2one	0.0488204
ENSMUSG00000053838	Nudcd3	NUDCD3	0.0631	0.626	ortholog_one2one	0.100799
ENSMUSG00000022516	Nudt16l1	NUDT16L1	NA	NA	ortholog_one2one	NA
ENSMUSG00000024213	Nudt3	NUDT3	0.0107	0.4862	ortholog_one2one	0.0220074
ENSMUSG00000037857	Nufip2	NUFIP2	0.0264	0.1889	ortholog_one2one	0.139756
ENSMUSG00000066306	Numa1	NUMA1	0.0967	0.6877	ortholog_one2one	0.140614
ENSMUSG00000052798	Nup107	NUP107	0.0453	0.7263	ortholog_one2one	0.0623709
ENSMUSG00000021374	Nup153	NUP153	0.0937	0.3647	ortholog_one2one	0.256923
ENSMUSG00000022142	Nup155	NUP155	0.0266	0.5865	ortholog_one2one	0.0453538
ENSMUSG00000030091	Nup210	NUP210	0.0881	0.7398	ortholog_one2one	0.119086
ENSMUSG00000109511	Nup62	NUP62	0.1265	1.0189	ortholog_one2one	0.124153
ENSMUSG00000040667	Nup88	NUP88	0.0498	0.4728	ortholog_one2one	0.10533
ENSMUSG00000032939	Nup93	NUP93	0.0117	0.4716	ortholog_one2one	0.0248092
ENSMUSG00000026516	Nvl	NVL	0.0689	0.4545	ortholog_one2one	0.151595
ENSMUSG00000036992	Nxt1	NXT1	0.0062	0.5061	ortholog_one2one	0.0122505
ENSMUSG00000040771	Oard1	OARD1	0.0207	0.3818	ortholog_one2one	0.0542169
ENSMUSG00000030934	Oat	OAT	0.0479	0.6969	ortholog_one2one	0.068733
ENSMUSG00000001173	Ocrl	OCRL	0.0419	0.4264	ortholog_one2one	0.0982645
ENSMUSG00000020456	Ogdh	OGDH	0.0215	0.499	ortholog_one2one	0.0430862
ENSMUSG00000034160	Ogt	OGT	0.0018	0.3694	ortholog_one2one	0.00487277
ENSMUSG00000040044	Orc3	ORC3	0.1124	0.4307	ortholog_one2one	0.260971
ENSMUSG00000031697	Orc6	ORC6	0.1305	0.4711	ortholog_one2one	0.277011
ENSMUSG00000025353	Ormdl2	ORMDL2	0.0123	0.4505	ortholog_one2one	0.027303
ENSMUSG00000038150	Ormdl3	ORMDL3	NA	NA	ortholog_one2one	NA
ENSMUSG00000044252	Osbpl1a	OSBPL1A	0.0421	0.5025	ortholog_one2one	0.0837811
ENSMUSG00000036990	Otud4	OTUD4	0.0627	0.3795	ortholog_one2one	0.165217
ENSMUSG00000038495	Otud7b	OTUD7B	0.0428	0.3384	ortholog_one2one	0.126478
ENSMUSG00000046034	Otulin	OTULIN	0.0508	0.4659	ortholog_one2one	0.109036
ENSMUSG00000022307	Oxr1	OXR1	0.0945	0.5562	ortholog_one2one	0.169903
ENSMUSG00000036737	Oxsr1	OXSR1	0.0204	0.3994	ortholog_one2one	0.0510766
ENSMUSG00000025130	P4hb	P4HB	0.0332	0.8067	ortholog_one2one	0.0411553
ENSMUSG00000022194	Pabpn1	PABPN1	0.0112	0.1901	ortholog_one2one	0.0589164
ENSMUSG00000016664	Pacsin2	PACSIN2	0.0308	0.6693	ortholog_one2one	0.0460182
ENSMUSG00000037366	Pafah2	PAFAH2	0.1228	0.5922	ortholog_one2one	0.207362
ENSMUSG00000027508	Pag1	PAG1	0.1106	0.915	ortholog_one2one	0.120874
ENSMUSG00000029247	Paics	PAICS	0.025	0.602	ortholog_one2one	0.0415282
ENSMUSG00000025451	Paip1	PAIP1	0.0101	0.3436	ortholog_one2one	0.0293946
ENSMUSG00000037058	Paip2	PAIP2	0.0065	0.0845	ortholog_one2one	0.0769231
ENSMUSG00000038683	Pak1ip1	PAK1IP1	0.1603	0.5411	ortholog_one2one	0.296248
ENSMUSG00000022781	Pak2	PAK2	0.0135	0.4831	ortholog_one2one	0.0279445
ENSMUSG00000020092	Pald1	PALD1	0.1024	1.0766	ortholog_one2one	0.0951142
ENSMUSG00000026335	Pam	PAM	0.0481	0.4742	ortholog_one2one	0.101434
ENSMUSG00000005682	Pan2	PAN2	0.0168	0.4678	ortholog_one2one	0.0359128
ENSMUSG00000018846	Pank3	PANK3	0.0037	0.3021	ortholog_one2one	0.0122476
ENSMUSG00000021111	Papola	PAPOLA	0.0194	0.204	ortholog_one2one	0.095098
ENSMUSG00000020273	Papolg	PAPOLG	0.0263	0.3311	ortholog_one2one	0.0794322
ENSMUSG00000028032	Papss1	PAPSS1	0.0069	0.6621	ortholog_one2one	0.0104214
ENSMUSG00000064225	Paqr9	PAQR9	0.029	0.9426	ortholog_one2one	0.030766
ENSMUSG00000021911	Parg	PARG	0.0663	0.3557	ortholog_one2one	0.186393
ENSMUSG00000026496	Parp1	PARP1	0.037	0.753	ortholog_one2one	0.0491368
ENSMUSG00000038507	Parp12	PARP12	0.1002	0.6599	ortholog_one2one	0.151841
ENSMUSG00000046139	Patl1	PATL1	0.0191	0.2451	ortholog_one2one	0.0779274
ENSMUSG00000020453	Patz1	PATZ1	0.0049	0.4988	ortholog_one2one	0.00982358
ENSMUSG00000035873	Pawr	PAWR	0.1257	0.5775	ortholog_one2one	0.217662
ENSMUSG00000031226	Pbdc1	PBDC1	0.0912	0.4949	ortholog_one2one	0.18428
ENSMUSG00000022033	Pbk	PBK	0.0627	0.5534	ortholog_one2one	0.1133
ENSMUSG00000042323	Pbrm1	PBRM1	0.0085	0.3574	ortholog_one2one	0.0237829
ENSMUSG00000034673	Pbx2	PBX2	0.0096	0.4642	ortholog_one2one	0.0206807
ENSMUSG00000051695	Pcbp1	PCBP1	0	0	ortholog_one2one	NA
ENSMUSG00000056851	Pcbp2	PCBP2	0	0	ortholog_one2one	NA
ENSMUSG00000033623	Pcgf3	PCGF3	0.0088	0.9465	ortholog_one2one	0.00929741
ENSMUSG00000024805	Pcgf5	PCGF5	0.0135	0.5055	ortholog_one2one	0.0267062
ENSMUSG00000031592	Pcm1	PCM1	0.0551	0.455	ortholog_one2one	0.121099
ENSMUSG00000027342	Pcna	PCNA	0.0147	0.5607	ortholog_one2one	0.0262172
ENSMUSG00000029623	Pdap1	PDAP1	0.0166	0.6549	ortholog_one2one	0.0253474
ENSMUSG00000027835	Pdcd10	PDCD10	0.0022	0.2311	ortholog_one2one	0.00951969
ENSMUSG00000025047	Pdcd11	PDCD11	0.1097	0.5742	ortholog_one2one	0.191048
ENSMUSG00000024975	Pdcd4	PDCD4	0.0146	0.5459	ortholog_one2one	0.0267448
ENSMUSG00000041837	Pdcd7	PDCD7	0.0509	0.5071	ortholog_one2one	0.100375
ENSMUSG00000069094	Pde7a	PDE7A	0.0297	0.3318	ortholog_one2one	0.0895118
ENSMUSG00000000489	Pdgfb	PDGFB	0.0526	0.7103	ortholog_one2one	0.0740532
ENSMUSG00000031299	Pdha1	PDHA1	0.0108	0.6022	ortholog_one2one	0.0179342
ENSMUSG00000047674	Pdha2	PDHA2	0.1426	0.8712	ortholog_one2one	0.163682
ENSMUSG00000021748	Pdhb	PDHB	0.0314	0.4864	ortholog_one2one	0.0645559
ENSMUSG00000027248	Pdia3	PDIA3	0.0363	0.3862	ortholog_one2one	0.0939927
ENSMUSG00000025823	Pdia4	PDIA4	0.059	0.5491	ortholog_one2one	0.107449
ENSMUSG00000020571	Pdia6	PDIA6	0.0409	0.6312	ortholog_one2one	0.0647972
ENSMUSG00000035232	Pdk3	PDK3	0.0151	0.5213	ortholog_one2one	0.028966
ENSMUSG00000049225	Pdp1	PDP1	0.0136	0.3656	ortholog_one2one	0.0371991
ENSMUSG00000034021	Pds5b	PDS5B	0.0187	0.5067	ortholog_one2one	0.0369055
ENSMUSG00000022197	Pdzd2	PDZD2	0.2098	0.6855	ortholog_one2one	0.306054
ENSMUSG00000074818	Pdzd7	PDZD7	0.0859	0.7292	ortholog_one2one	0.1178
ENSMUSG00000074746	Pdzd8	PDZD8	0.0723	0.3782	ortholog_one2one	0.191169
ENSMUSG00000028779	Pef1	PEF1	0.0672	0.4704	ortholog_one2one	0.142857
ENSMUSG00000092035	Peg10	PEG10	0.2388	0.8766	ortholog_one2one	0.272416
ENSMUSG00000020134	Peli1	PELI1	0.0011	0.3535	ortholog_one2one	0.00311174
ENSMUSG00000021846	Peli2	PELI2	0.0231	0.6964	ortholog_one2one	0.0331706
ENSMUSG00000020893	Per1	PER1	0.0446	0.4483	ortholog_one2one	0.099487
ENSMUSG00000020283	Pex13	PEX13	0.0454	0.3829	ortholog_one2one	0.118569
ENSMUSG00000020899	Pfas	PFAS	0.0675	0.5764	ortholog_one2one	0.117106
ENSMUSG00000006412	Pfdn2	PFDN2	0.0213	0.3446	ortholog_one2one	0.0618108
ENSMUSG00000018293	Pfn1	PFN1	0.0188	0.2138	ortholog_one2one	0.0879326
ENSMUSG00000027805	Pfn2	PFN2	0.0034	0.1479	ortholog_one2one	0.0229885
ENSMUSG00000073678	Pgap1	PGAP1	0.0494	0.3753	ortholog_one2one	0.131628
ENSMUSG00000028961	Pgd	PGD	0.0313	0.5972	ortholog_one2one	0.0524113
ENSMUSG00000024477	Pggt1b	PGGT1B	0.0162	0.6456	ortholog_one2one	0.0250929
ENSMUSG00000030729	Pgm2l1	PGM2L1	0.0315	0.3958	ortholog_one2one	0.0795856
ENSMUSG00000066043	Phactr4	PHACTR4	0.1262	0.4641	ortholog_one2one	0.271924
ENSMUSG00000028796	Phc2	PHC2	0.0654	0.4291	ortholog_one2one	0.152412
ENSMUSG00000047777	Phf13	PHF13	0.0312	0.6567	ortholog_one2one	0.0475103
ENSMUSG00000029629	Phf14	PHF14	0.0151	0.4748	ortholog_one2one	0.0318029
ENSMUSG00000038025	Phf2	PHF2	0.0326	0.6913	ortholog_one2one	0.0471575
ENSMUSG00000038116	Phf20	PHF20	0.056	0.4616	ortholog_one2one	0.121317
ENSMUSG00000058318	Phf21a	PHF21A	0.0248	0.2205	ortholog_one2one	0.112472
ENSMUSG00000018572	Phf23	PHF23	0.0258	0.3116	ortholog_one2one	0.0827985
ENSMUSG00000061360	Phf5a	PHF5A	0	0	ortholog_one2one	NA
ENSMUSG00000041229	Phf8	PHF8	0.0249	0.3438	ortholog_one2one	0.0724258
ENSMUSG00000032253	Phip	PHIP	0.024	0.4458	ortholog_one2one	0.0538358
ENSMUSG00000034055	Phka1	PHKA1	0.0261	0.3118	ortholog_one2one	0.0837075
ENSMUSG00000039987	Phtf2	PHTF2	0.0311	0.442	ortholog_one2one	0.070362
ENSMUSG00000038861	Pi4kb	PI4KB	0.007	0.3061	ortholog_one2one	0.0228683
ENSMUSG00000025423	Pias2	PIAS2	0.0091	0.2573	ortholog_one2one	0.0353673
ENSMUSG00000045140	Pigw	PIGW	0.1479	0.483	ortholog_one2one	0.306211
ENSMUSG00000030660	Pik3c2a	PIK3C2A	0.0484	0.35	ortholog_one2one	0.138286
ENSMUSG00000027665	Pik3ca	PIK3CA	0.0061	0.5378	ortholog_one2one	0.0113425
ENSMUSG00000025949	Pikfyve	PIKFYVE	0.0332	0.3639	ortholog_one2one	0.0912339
ENSMUSG00000026737	Pip4k2a	PIP4K2A	0.0078	0.6142	ortholog_one2one	0.0126994
ENSMUSG00000018547	Pip4k2b	PIP4K2B	0.0041	0.5521	ortholog_one2one	0.00742619
ENSMUSG00000034902	Pip5k1c	PIP5K1C	0.0481	1.1851	ortholog_one2one	0.0405873
ENSMUSG00000033644	Piwil2	PIWIL2	0.0635	0.5273	ortholog_one2one	0.120425
ENSMUSG00000024083	Pja2	PJA2	0.0904	0.5063	ortholog_one2one	0.17855
ENSMUSG00000035268	Pkig	PKIG	0.0436	0.5288	ortholog_one2one	0.0824508
ENSMUSG00000028577	Plaa	PLAA	0.03	0.3818	ortholog_one2one	0.0785752
ENSMUSG00000051413	Plagl2	PLAGL2	0.0067	0.2894	ortholog_one2one	0.0231513
ENSMUSG00000024960	Plcb3	PLCB3	0.0374	0.8673	ortholog_one2one	0.0431223
ENSMUSG00000043648	Pld6	PLD6	0.0995	1.079	ortholog_one2one	0.092215
ENSMUSG00000005225	Plekha8	PLEKHA8	0.039	0.4926	ortholog_one2one	0.0791717
ENSMUSG00000026123	Plekhb2	PLEKHB2	NA	NA	ortholog_one2one	NA
ENSMUSG00000049969	Plekhf2	PLEKHF2	0.0129	0.5203	ortholog_one2one	0.0247934
ENSMUSG00000037552	Plekhg2	PLEKHG2	0.1726	0.6616	ortholog_one2one	0.260883
ENSMUSG00000035278	Plekhj1	PLEKHJ1	0.1813	1.8173	ortholog_one2one	0.0997634
ENSMUSG00000025758	Plk4	PLK4	0.0946	0.5096	ortholog_one2one	0.185636
ENSMUSG00000032374	Plod2	PLOD2	0.0498	0.5099	ortholog_one2one	0.0976662
ENSMUSG00000030084	Plxna1	PLXNA1	0.019	0.9802	ortholog_one2one	0.0193838
ENSMUSG00000024521	Pmaip1	PMAIP1	0.196	0.5308	ortholog_one2one	0.369254
ENSMUSG00000050424	Pnma5	PNMA5	0.3122	0.8012	ortholog_one2one	0.389666
ENSMUSG00000020994	Pnn	PNN	0.0299	0.3556	ortholog_one2one	0.0840832
ENSMUSG00000036257	Pnpla8	PNPLA8	0.0895	0.5066	ortholog_one2one	0.176668
ENSMUSG00000040128	Pnrc1	PNRC1	0.0939	0.6579	ortholog_one2one	0.142727
ENSMUSG00000034064	Poglut1	POGLUT1	0.046	0.4646	ortholog_one2one	0.0990099
ENSMUSG00000038902	Pogz	POGZ	0.0348	0.3696	ortholog_one2one	0.0941558
ENSMUSG00000006678	Pola1	POLA1	0.0655	0.315	ortholog_one2one	0.207937
ENSMUSG00000041815	Poldip3	POLDIP3	0.0442	0.4568	ortholog_one2one	0.0967601
ENSMUSG00000030042	Pole4	POLE4	0.0233	0.8007	ortholog_one2one	0.0290995
ENSMUSG00000067148	Polr1c	POLR1C	0.0289	0.7166	ortholog_one2one	0.0403293
ENSMUSG00000029250	Polr2b	POLR2B	0.0005	0.5375	ortholog_one2one	0.000930233
ENSMUSG00000004667	Polr2e	POLR2E	0.0059	1.3619	ortholog_one2one	0.00433218
ENSMUSG00000021018	Polr2h	POLR2H	0.1303	0.881	ortholog_one2one	0.1479
ENSMUSG00000032199	Polr2m	POLR2M	0.176	0.4364	ortholog_one2one	0.4033
ENSMUSG00000034453	Polr3b	POLR3B	0.0029	0.5606	ortholog_one2one	0.00517303
ENSMUSG00000029649	Pomp	POMP	0.024	0.7482	ortholog_one2one	0.032077
ENSMUSG00000026565	Pou2f1	POU2F1	0.0342	0.2839	ortholog_one2one	0.120465
ENSMUSG00000090125	Pou3f1	POU3F1	0.0027	0.4855	ortholog_one2one	0.00556128
ENSMUSG00000020089	Ppa1	PPA1	0.0291	0.5736	ortholog_one2one	0.0507322
ENSMUSG00000029246	Ppat	PPAT	0.042	0.647	ortholog_one2one	0.064915
ENSMUSG00000037519	Ppfia1	PPFIA1	0.0211	0.7474	ortholog_one2one	0.0282312
ENSMUSG00000016487	Ppfibp1	PPFIBP1	0.0568	0.536	ortholog_one2one	0.10597
ENSMUSG00000024538	Ppic	PPIC	0.0527	0.5571	ortholog_one2one	0.094597
ENSMUSG00000024007	Ppil1	PPIL1	0.0084	0.678	ortholog_one2one	0.0123894
ENSMUSG00000015757	Ppil4	PPIL4	0.0151	0.4988	ortholog_one2one	0.0302727
ENSMUSG00000029147	Ppm1g	PPM1G	0.0259	0.2822	ortholog_one2one	0.0917789
ENSMUSG00000040385	Ppp1ca	PPP1CA	0.0013	0.6645	ortholog_one2one	0.00195636
ENSMUSG00000014956	Ppp1cb	PPP1CB	0	0	ortholog_one2one	NA
ENSMUSG00000019907	Ppp1r12a	PPP1R12A	0.0461	0.5295	ortholog_one2one	0.0870633
ENSMUSG00000046062	Ppp1r15b	PPP1R15B	0.2104	0.5067	ortholog_one2one	0.415236
ENSMUSG00000034595	Ppp1r18	PPP1R18	0.1363	0.4636	ortholog_one2one	0.294003
ENSMUSG00000020349	Ppp2ca	PPP2CA	0.0015	0.2598	ortholog_one2one	0.00577367
ENSMUSG00000009630	Ppp2cb	PPP2CB	0	0	ortholog_one2one	NA
ENSMUSG00000032058	Ppp2r1b	PPP2R1B	0.0391	0.4334	ortholog_one2one	0.0902169
ENSMUSG00000021051	Ppp2r5e	PPP2R5E	0.001	0.1675	ortholog_one2one	0.00597015
ENSMUSG00000028161	Ppp3ca	PPP3CA	0.0018	0.336	ortholog_one2one	0.00535714
ENSMUSG00000030697	Ppp4c	PPP4C	0	0	ortholog_one2one	NA
ENSMUSG00000041846	Ppp4r3a	PPP4R3A	0.0033	0.3152	ortholog_one2one	0.0104695
ENSMUSG00000024908	Ppp6r3	PPP6R3	0.0193	0.4055	ortholog_one2one	0.0475956
ENSMUSG00000055491	Pprc1	PPRC1	0.1368	0.4032	ortholog_one2one	0.339286
ENSMUSG00000031157	Pqbp1	PQBP1	0.0681	0.7189	ortholog_one2one	0.0947281
ENSMUSG00000038943	Prc1	PRC1	0.0878	0.4643	ortholog_one2one	0.189102
ENSMUSG00000039410	Prdm16	PRDM16	0.0563	0.7401	ortholog_one2one	0.0760708
ENSMUSG00000057637	Prdm2	PRDM2	0.0849	0.6014	ortholog_one2one	0.141171
ENSMUSG00000035529	Prdm4	PRDM4	0.0257	0.331	ortholog_one2one	0.0776435
ENSMUSG00000028691	Prdx1	PRDX1	0.0285	0.3669	ortholog_one2one	0.0776778
ENSMUSG00000016257	Prelid3b	PRELID3B	0.0299	0.7752	ortholog_one2one	0.0385707
ENSMUSG00000019849	Prep	PREP	0.0197	0.6567	ortholog_one2one	0.0299985
ENSMUSG00000039621	Prex1	PREX1	0.0442	0.9644	ortholog_one2one	0.0458316
ENSMUSG00000006014	Prg4	PRG4	NA	NA	ortholog_one2one	NA
ENSMUSG00000005469	Prkaca	PRKACA	0.0086	0.5761	ortholog_one2one	0.014928
ENSMUSG00000028944	Prkag2	PRKAG2	0.0296	0.4099	ortholog_one2one	0.0722127
ENSMUSG00000020612	Prkar1a	PRKAR1A	0.016	0.6073	ortholog_one2one	0.0263461
ENSMUSG00000002997	Prkar2b	PRKAR2B	0.0156	0.3756	ortholog_one2one	0.0415335
ENSMUSG00000037643	Prkci	PRKCI	0.0069	0.4694	ortholog_one2one	0.0146996
ENSMUSG00000024070	Prkd3	PRKD3	0.0208	0.4455	ortholog_one2one	0.0466891
ENSMUSG00000023110	Prmt5	PRMT5	0.0095	0.3702	ortholog_one2one	0.0256618
ENSMUSG00000024735	Prpf19	PRPF19	0.0028	0.4928	ortholog_one2one	0.00568182
ENSMUSG00000063800	Prpf38a	PRPF38A	0.0056	0.6964	ortholog_one2one	0.00804136
ENSMUSG00000035597	Prpf39	PRPF39	0.0271	0.3437	ortholog_one2one	0.0788478
ENSMUSG00000021413	Prpf4b	PRPF4B	0.0231	0.5866	ortholog_one2one	0.0393795
ENSMUSG00000054280	Prr14l	PRR14L	0.2877	0.4007	ortholog_one2one	0.717994
ENSMUSG00000034686	Prr7	PRR7	0.0159	0.6181	ortholog_one2one	0.025724
ENSMUSG00000024393	Prrc2a	PRRC2A	0.0541	0.3066	ortholog_one2one	0.176451
ENSMUSG00000036030	Prtg	PRTG	0.0557	0.6295	ortholog_one2one	0.0884829
ENSMUSG00000015711	Prune1	PRUNE1	0.0895	0.4266	ortholog_one2one	0.209798
ENSMUSG00000004207	Psap	PSAP	0.2096	0.9074	ortholog_one2one	0.23099
ENSMUSG00000024640	Psat1	PSAT1	0.0389	0.6163	ortholog_one2one	0.0631186
ENSMUSG00000028484	Psip1	PSIP1	0.0329	0.4489	ortholog_one2one	0.0732903
ENSMUSG00000030751	Psma1	PSMA1	0.0104	0.3961	ortholog_one2one	0.026256
ENSMUSG00000027566	Psma7	PSMA7	0.0058	0.4369	ortholog_one2one	0.0132753
ENSMUSG00000036743	Psma8	PSMA8	0.0297	0.5633	ortholog_one2one	0.052725
ENSMUSG00000014769	Psmb1	PSMB1	0.0363	0.677	ortholog_one2one	0.0536189
ENSMUSG00000028837	Psmb2	PSMB2	0.017	0.3048	ortholog_one2one	0.0557743
ENSMUSG00000021832	Psmc6	PSMC6	0	0	ortholog_one2one	NA
ENSMUSG00000031429	Psmd10	PSMD10	0.0296	0.2739	ortholog_one2one	0.108069
ENSMUSG00000026914	Psmd14	PSMD14	0	0	ortholog_one2one	NA
ENSMUSG00000078652	Psme3	PSME3	0.0035	0.2902	ortholog_one2one	0.0120606
ENSMUSG00000022913	Psmg1	PSMG1	0.0839	0.7783	ortholog_one2one	0.107799
ENSMUSG00000024537	Psmg2	PSMG2	0.072	0.6304	ortholog_one2one	0.114213
ENSMUSG00000021938	Pspc1	PSPC1	0.0098	0.3334	ortholog_one2one	0.0293941
ENSMUSG00000006498	Ptbp1	PTBP1	0.013	1.2467	ortholog_one2one	0.0104275
ENSMUSG00000028134	Ptbp2	PTBP2	0.0017	0.3034	ortholog_one2one	0.00560316
ENSMUSG00000028382	Ptbp3	PTBP3	0.0235	0.3359	ortholog_one2one	0.0699613
ENSMUSG00000021466	Ptch1	PTCH1	0.0214	0.526	ortholog_one2one	0.0406844
ENSMUSG00000013663	Pten	PTEN	0.0011	0.1824	ortholog_one2one	0.0060307
ENSMUSG00000071072	Ptges3	PTGES3	0.0075	0.3431	ortholog_one2one	0.0218595
ENSMUSG00000022607	Ptk2	PTK2	0.0133	0.4125	ortholog_one2one	0.0322424
ENSMUSG00000023972	Ptk7	PTK7	0.0445	0.5979	ortholog_one2one	0.0744272
ENSMUSG00000026238	Ptma	PTMA	0.0202	0.4026	ortholog_one2one	0.0501739
ENSMUSG00000039515	Ptpa	PTPA	0.0174	0.5448	ortholog_one2one	0.0319383
ENSMUSG00000038042	Ptpdc1	PTPDC1	0.13	0.6133	ortholog_one2one	0.211968
ENSMUSG00000028771	Ptpn12	PTPN12	0.0854	0.5312	ortholog_one2one	0.160768
ENSMUSG00000024539	Ptpn2	PTPN2	0.0516	0.3805	ortholog_one2one	0.135611
ENSMUSG00000027303	Ptpra	PTPRA	0.0229	0.3773	ortholog_one2one	0.0606944
ENSMUSG00000033295	Ptprf	PTPRF	0.0199	0.6594	ortholog_one2one	0.030179
ENSMUSG00000028580	Pum1	PUM1	0.0048	0.2401	ortholog_one2one	0.0199917
ENSMUSG00000020594	Pum2	PUM2	0.0092	0.2198	ortholog_one2one	0.0418562
ENSMUSG00000033356	Pus7l	PUS7L	0.1815	0.806	ortholog_one2one	0.225186
ENSMUSG00000001785	Pwp1	PWP1	0.0535	0.6323	ortholog_one2one	0.0846117
ENSMUSG00000044950	Pwwp2a	PWWP2A	0.0673	0.3066	ortholog_one2one	0.219504
ENSMUSG00000020674	Pxdn	PXDN	0.0472	0.9264	ortholog_one2one	0.0509499
ENSMUSG00000045378	Pxt1	PXT1	0.3185	0.5416	ortholog_one2one	0.588072
ENSMUSG00000047824	Pygo2	PYGO2	0.0168	0.445	ortholog_one2one	0.0377528
ENSMUSG00000064030	Pym1	PYM1	0.053	0.6844	ortholog_one2one	0.0774401
ENSMUSG00000015806	Qdpr	QDPR	0.0319	0.51	ortholog_one2one	0.062549
ENSMUSG00000062078	Qk	QKI	0	0	ortholog_one2one	NA
ENSMUSG00000006673	Qrich1	QRICH1	0.0045	0.3361	ortholog_one2one	0.0133889
ENSMUSG00000074994	Qser1	QSER1	0.0974	0.4083	ortholog_one2one	0.23855
ENSMUSG00000056211	R3hdm1	R3HDM1	0.0447	0.2908	ortholog_one2one	0.153714
ENSMUSG00000004771	Rab11a	RAB11A	0	0	ortholog_one2one	NA
ENSMUSG00000077450	Rab11b	RAB11B	0.0039	0.6664	ortholog_one2one	0.00585234
ENSMUSG00000017639	Rab11fip4	RAB11FIP4	0.0333	0.8547	ortholog_one2one	0.038961
ENSMUSG00000026878	Rab14	RAB14	0	0	ortholog_one2one	NA
ENSMUSG00000073639	Rab18	RAB18	0.0045	0.2669	ortholog_one2one	0.0168602
ENSMUSG00000020149	Rab1a	RAB1A	0	0	ortholog_one2one	NA
ENSMUSG00000020132	Rab21	RAB21	0.0194	0.4215	ortholog_one2one	0.0460261
ENSMUSG00000027519	Rab22a	RAB22A	0.0123	0.4549	ortholog_one2one	0.0270389
ENSMUSG00000047187	Rab2a	RAB2A	0.0065	0.3922	ortholog_one2one	0.0165732
ENSMUSG00000025730	Rab40c	RAB40C	NA	NA	ortholog_one2one	NA
ENSMUSG00000017831	Rab5a	RAB5A	0.0083	0.4923	ortholog_one2one	0.0168596
ENSMUSG00000030704	Rab6a	RAB6A	0.0109	0.4847	ortholog_one2one	0.0224881
ENSMUSG00000032549	Rab6b	RAB6B	0	0	ortholog_one2one	NA
ENSMUSG00000079477	Rab7	RAB7A	0	0	ortholog_one2one	NA
ENSMUSG00000020817	Rabep1	RABEP1	0.0197	0.4076	ortholog_one2one	0.0483317
ENSMUSG00000022827	Rabl3	RABL3	0.0424	0.3578	ortholog_one2one	0.118502
ENSMUSG00000020372	Rack1	RACK1	0	0	ortholog_one2one	NA
ENSMUSG00000021635	Rad17	RAD17	0.1054	0.5375	ortholog_one2one	0.196093
ENSMUSG00000030254	Rad18	RAD18	0.1489	0.5568	ortholog_one2one	0.267421
ENSMUSG00000022314	Rad21	RAD21	0.0139	0.7005	ortholog_one2one	0.019843
ENSMUSG00000028426	Rad23b	RAD23B	0.0525	0.3728	ortholog_one2one	0.140826
ENSMUSG00000027323	Rad51	RAD51	0.0811	0.53	ortholog_one2one	0.153019
ENSMUSG00000029576	Radil	RADIL	0.1005	1.1725	ortholog_one2one	0.0857143
ENSMUSG00000062115	Rai1	RAI1	0.0866	0.735	ortholog_one2one	0.117823
ENSMUSG00000022246	Rai14	RAI14	0.0893	0.6384	ortholog_one2one	0.139881
ENSMUSG00000024096	Ralbp1	RALBP1	0.0352	0.4939	ortholog_one2one	0.0712695
ENSMUSG00000021027	Ralgapa1	RALGAPA1	0.0245	0.3632	ortholog_one2one	0.0674559
ENSMUSG00000026594	Ralgps2	RALGPS2	0.012	0.5795	ortholog_one2one	0.0207075
ENSMUSG00000005732	Ranbp1	RANBP1	0.0437	0.7461	ortholog_one2one	0.0585712
ENSMUSG00000003226	Ranbp2	RANBP2	0.0679	0.4835	ortholog_one2one	0.140434
ENSMUSG00000038546	Ranbp9	RANBP9	0.0617	0.3434	ortholog_one2one	0.179674
ENSMUSG00000052681	Rap1b	RAP1B	0	0	ortholog_one2one	NA
ENSMUSG00000036894	Rap2b	RAP2B	0	0	ortholog_one2one	NA
ENSMUSG00000050029	Rap2c	RAP2C	0	0	ortholog_one2one	NA
ENSMUSG00000062232	Rapgef2	RAPGEF2	0.0259	0.7073	ortholog_one2one	0.0366181
ENSMUSG00000001288	Rarg	RARG	0.0088	0.6626	ortholog_one2one	0.013281
ENSMUSG00000028292	Rars2	RARS2	0.0764	0.4555	ortholog_one2one	0.167728
ENSMUSG00000021549	Rasa1	RASA1	0.0219	0.3537	ortholog_one2one	0.0619169
ENSMUSG00000032413	Rasa2	RASA2	0.0577	0.4195	ortholog_one2one	0.137545
ENSMUSG00000031453	Rasa3	RASA3	0.0226	1.06	ortholog_one2one	0.0213208
ENSMUSG00000034472	Rasd2	RASD2	0.024	2.2678	ortholog_one2one	0.0105829
ENSMUSG00000049907	Rasl11b	RASL11B	0.0254	0.9554	ortholog_one2one	0.0265857
ENSMUSG00000025795	Rassf3	RASSF3	0.0327	0.6151	ortholog_one2one	0.0531621
ENSMUSG00000022105	Rb1	RB1	0.0444	0.4386	ortholog_one2one	0.101231
ENSMUSG00000057236	Rbbp4	RBBP4	0	0	ortholog_one2one	NA
ENSMUSG00000030779	Rbbp6	RBBP6	0.0617	0.6	ortholog_one2one	0.102833
ENSMUSG00000031353	Rbbp7	RBBP7	0.0098	0.322	ortholog_one2one	0.0304348
ENSMUSG00000033565	Rbfox2	RBFOX2	0.0231	0.2285	ortholog_one2one	0.101094
ENSMUSG00000089824	Rbm12	RBM12	0.0387	0.3313	ortholog_one2one	0.116813
ENSMUSG00000006456	Rbm14	RBM14	0.0087	0.2036	ortholog_one2one	0.0427308
ENSMUSG00000026889	Rbm18	RBM18	0.0048	0.2753	ortholog_one2one	0.0174355
ENSMUSG00000024604	Rbm22	RBM22	0	0	ortholog_one2one	NA
ENSMUSG00000010608	Rbm25	RBM25	0.0015	0.4806	ortholog_one2one	0.0031211
ENSMUSG00000048271	Rbm33	RBM33	0.0715	0.5747	ortholog_one2one	0.124413
ENSMUSG00000027510	Rbm38	RBM38	0.0466	0.8229	ortholog_one2one	0.056629
ENSMUSG00000027620	Rbm39	RBM39	0.0008	0.3807	ortholog_one2one	0.00210139
ENSMUSG00000036733	Rbm42	RBM42	0.0085	0.4268	ortholog_one2one	0.0199157
ENSMUSG00000033882	Rbm46	RBM46	0.0157	0.5166	ortholog_one2one	0.030391
ENSMUSG00000033760	Rbm4b	RBM4B	0.02	0.3972	ortholog_one2one	0.0503525
ENSMUSG00000032582	Rbm6	RBM6	0.0551	0.3057	ortholog_one2one	0.180242
ENSMUSG00000026970	Rbms1	RBMS1	0.0381	0.4185	ortholog_one2one	0.0910394
ENSMUSG00000039191	Rbpj	RBPJ	0.0103	0.4263	ortholog_one2one	0.0241614
ENSMUSG00000022400	Rbx1	RBX1	0	0	ortholog_one2one	NA
ENSMUSG00000040423	Rc3h1	RC3H1	0.0326	0.3303	ortholog_one2one	0.0986982
ENSMUSG00000075376	Rc3h2	RC3H2	0.0212	0.2525	ortholog_one2one	0.0839604
ENSMUSG00000022951	Rcan1	RCAN1	0.2215	1.1865	ortholog_one2one	0.186684
ENSMUSG00000059713	Rcan3	RCAN3	0.0466	1.6203	ortholog_one2one	0.0287601
ENSMUSG00000040945	Rcc2	RCC2	0.0232	0.7852	ortholog_one2one	0.0295466
ENSMUSG00000029397	Rchy1	RCHY1	0.0487	0.4717	ortholog_one2one	0.103244
ENSMUSG00000025921	Rdh10	RDH10	0.0055	0.3605	ortholog_one2one	0.0152566
ENSMUSG00000032050	Rdx	RDX	0.007	0.5745	ortholog_one2one	0.0121845
ENSMUSG00000028476	Reck	RECK	0.0337	0.5289	ortholog_one2one	0.0637171
ENSMUSG00000042453	Reln	RELN	0.0236	0.5318	ortholog_one2one	0.0443776
ENSMUSG00000039852	Rere	RERE	0.027	0.5465	ortholog_one2one	0.0494053
ENSMUSG00000029249	Rest	REST	0.2507	1.0462	ortholog_one2one	0.239629
ENSMUSG00000049339	Retreg2	RETREG2	0.0712	0.3455	ortholog_one2one	0.206078
ENSMUSG00000020696	Rffl	RFFL	0.0591	0.3597	ortholog_one2one	0.164304
ENSMUSG00000039316	Rftn1	RFTN1	0.1837	0.6727	ortholog_one2one	0.273079
ENSMUSG00000033596	Rfwd3	RFWD3	0.2113	0.5194	ortholog_one2one	0.406816
ENSMUSG00000037674	Rfx7	RFX7	0.0357	0.2824	ortholog_one2one	0.126416
ENSMUSG00000048027	Rgmb	RGMB	0.0518	0.4127	ortholog_one2one	0.125515
ENSMUSG00000029101	Rgs12	RGS12	0.0737	0.7571	ortholog_one2one	0.0973451
ENSMUSG00000028945	Rheb	RHEB	0.0051	0.3546	ortholog_one2one	0.0143824
ENSMUSG00000023755	Rhebl1	RHEBL1	0.0593	0.3274	ortholog_one2one	0.181124
ENSMUSG00000048668	Rhno1	RHNO1	0.2097	0.4664	ortholog_one2one	0.449614
ENSMUSG00000019944	Rhobtb1	RHOBTB1	0.0623	0.8415	ortholog_one2one	0.0740345
ENSMUSG00000030494	Rhpn2	RHPN2	0.0797	0.8391	ortholog_one2one	0.0949827
ENSMUSG00000038658	Ric1	RIC1	0.0356	0.4109	ortholog_one2one	0.0866391
ENSMUSG00000050310	Rictor	RICTOR	0.0225	0.5241	ortholog_one2one	0.0429307
ENSMUSG00000040649	Rimklb	RIMKLB	0.0149	0.3698	ortholog_one2one	0.040292
ENSMUSG00000001768	Rin2	RIN2	0.0405	0.4468	ortholog_one2one	0.0906446
ENSMUSG00000046791	Riox1	RIOX1	0.1067	0.7138	ortholog_one2one	0.149482
ENSMUSG00000005251	Ripk4	RIPK4	0.0468	0.9424	ortholog_one2one	0.0496604
ENSMUSG00000049878	Rlf	RLF	0.0538	0.4684	ortholog_one2one	0.114859
ENSMUSG00000056537	Rlim	RLIM	0.0551	0.5285	ortholog_one2one	0.104257
ENSMUSG00000002222	Rmnd5a	RMND5A	0	0	ortholog_one2one	NA
ENSMUSG00000041740	Rnf10	RNF10	0.0389	0.2717	ortholog_one2one	0.143173
ENSMUSG00000028557	Rnf11	RNF11	0.003	0.1131	ortholog_one2one	0.0265252
ENSMUSG00000028098	Rnf115	RNF115	0.0355	0.3045	ortholog_one2one	0.116585
ENSMUSG00000037075	Rnf139	RNF139	0.0328	0.2802	ortholog_one2one	0.117059
ENSMUSG00000038876	Rnf146	RNF146	0.0369	0.3867	ortholog_one2one	0.0954228
ENSMUSG00000048234	Rnf149	RNF149	0.1541	0.4949	ortholog_one2one	0.311376
ENSMUSG00000040746	Rnf167	RNF167	0.041	0.3536	ortholog_one2one	0.11595
ENSMUSG00000000365	Rnf17	RNF17	0.1445	0.4719	ortholog_one2one	0.306209
ENSMUSG00000026484	Rnf2	RNF2	0.0013	0.431	ortholog_one2one	0.00301624
ENSMUSG00000028309	Rnf20	RNF20	0.0096	0.5343	ortholog_one2one	0.0179674
ENSMUSG00000045078	Rnf216	RNF216	0.0632	0.4475	ortholog_one2one	0.141229
ENSMUSG00000022120	Rnf219	OBI1	0.1028	0.5784	ortholog_one2one	0.177732
ENSMUSG00000028677	Rnf220	RNF220	0.0096	0.3503	ortholog_one2one	0.0274051
ENSMUSG00000029474	Rnf34	RNF34	0.0559	0.4848	ortholog_one2one	0.115305
ENSMUSG00000035696	Rnf38	RNF38	0.0116	0.2264	ortholog_one2one	0.0512367
ENSMUSG00000029110	Rnf4	RNF4	0.0559	0.4107	ortholog_one2one	0.136109
ENSMUSG00000025373	Rnf41	RNF41	0.0014	0.4458	ortholog_one2one	0.00314042
ENSMUSG00000034928	Rnf44	RNF44	0.04	0.4126	ortholog_one2one	0.0969462
ENSMUSG00000029634	Rnf6	RNF6	0.1625	0.6305	ortholog_one2one	0.257732
ENSMUSG00000020521	Rnft1	RNFT1	0.0766	0.3633	ortholog_one2one	0.210845
ENSMUSG00000028274	Rngtt	RNGTT	0.0238	0.3932	ortholog_one2one	0.060529
ENSMUSG00000009535	Rnmt	RNMT	0.1578	0.631	ortholog_one2one	0.250079
ENSMUSG00000022883	Robo1	ROBO1	0.0206	0.5267	ortholog_one2one	0.0391114
ENSMUSG00000024290	Rock1	ROCK1	0.015	0.4076	ortholog_one2one	0.0368008
ENSMUSG00000020580	Rock2	ROCK2	0.0159	0.4467	ortholog_one2one	0.0355944
ENSMUSG00000022236	Ropn1l	ROPN1L	0.134	0.7121	ortholog_one2one	0.188176
ENSMUSG00000000751	Rpa1	RPA1	0.0742	0.6042	ortholog_one2one	0.122807
ENSMUSG00000028884	Rpa2	RPA2	0.07	0.5942	ortholog_one2one	0.117805
ENSMUSG00000053604	Rpia	RPIA	0.0632	0.3583	ortholog_one2one	0.176389
ENSMUSG00000060499	Rpl10l	RPL10L	NA	NA	ortholog_one2one	NA
ENSMUSG00000059070	Rpl18	RPL18	0.0166	0.6497	ortholog_one2one	0.0255503
ENSMUSG00000057841	Rpl32	RPL32	0	0	ortholog_one2one	NA
ENSMUSG00000046330	Rpl37a	RPL37A	0	0	ortholog_one2one	NA
ENSMUSG00000063888	Rpl7l1	RPL7L1	0.0877	0.4542	ortholog_one2one	0.193087
ENSMUSG00000030062	Rpn1	RPN1	0.0228	0.6521	ortholog_one2one	0.034964
ENSMUSG00000023156	Rpp14	RPP14	0.0876	0.6343	ortholog_one2one	0.138105
ENSMUSG00000028106	Rprd2	RPRD2	0.046	0.2684	ortholog_one2one	0.171386
ENSMUSG00000039001	Rps21	RPS21	0.0274	0.3565	ortholog_one2one	0.0768583
ENSMUSG00000025362	Rps26	RPS26	0	0	ortholog_one2one	NA
ENSMUSG00000030744	Rps3	RPS3	0.0019	0.4799	ortholog_one2one	0.00395916
ENSMUSG00000031309	Rps6ka3	RPS6KA3	0.0006	0.28	ortholog_one2one	0.00214286
ENSMUSG00000070934	Rraga	RRAGA	0	0	ortholog_one2one	NA
ENSMUSG00000028278	Rragd	RRAGD	0.0234	0.5056	ortholog_one2one	0.0462816
ENSMUSG00000055723	Rras2	RRAS2	0	0	ortholog_one2one	NA
ENSMUSG00000030888	Rrp8	RRP8	0.1843	0.5262	ortholog_one2one	0.350247
ENSMUSG00000061024	Rrs1	RRS1	0.0419	0.7269	ortholog_one2one	0.057642
ENSMUSG00000051920	Rspo2	RSPO2	0.0185	0.3195	ortholog_one2one	0.057903
ENSMUSG00000050079	Rspry1	RSPRY1	0.0174	0.2627	ortholog_one2one	0.0662352
ENSMUSG00000029422	Rsrc2	RSRC2	0.0152	0.5584	ortholog_one2one	0.0272206
ENSMUSG00000000339	Rtca	RTCA	0.0472	0.5989	ortholog_one2one	0.0788112
ENSMUSG00000037846	Rtkn2	RTKN2	0.169	0.8265	ortholog_one2one	0.204477
ENSMUSG00000024758	Rtn3	RTN3	NA	NA	ortholog_one2one	NA
ENSMUSG00000020458	Rtn4	RTN4	0.1472	0.4061	ortholog_one2one	0.362472
ENSMUSG00000040570	Rundc3b	RUNDC3B	0.0253	0.4178	ortholog_one2one	0.0605553
ENSMUSG00000032547	Ryk	RYK	0.0277	0.3893	ortholog_one2one	0.0711534
ENSMUSG00000040928	S100pbp	S100PBP	0.1747	0.3321	ortholog_one2one	0.526046
ENSMUSG00000052833	Sae1	SAE1	0.0316	0.5892	ortholog_one2one	0.053632
ENSMUSG00000071054	Safb	SAFB	0.0723	0.8794	ortholog_one2one	0.0822151
ENSMUSG00000031665	Sall1	SALL1	0.0503	0.4345	ortholog_one2one	0.115765
ENSMUSG00000027547	Sall4	SALL4	0.1372	0.8583	ortholog_one2one	0.159851
ENSMUSG00000109336	Samd4b	SAMD4B	0.0101	0.3053	ortholog_one2one	0.0330822
ENSMUSG00000027639	Samhd1	SAMHD1	0.1669	0.7937	ortholog_one2one	0.210281
ENSMUSG00000020088	Sar1a	SAR1A	0.0023	0.3187	ortholog_one2one	0.00721682
ENSMUSG00000018974	Sart3	SART3	0.0699	0.9269	ortholog_one2one	0.0754127
ENSMUSG00000015305	Sash1	SASH1	0.0704	0.6767	ortholog_one2one	0.104034
ENSMUSG00000023927	Satb1	SATB1	0.0079	0.4008	ortholog_one2one	0.0197106
ENSMUSG00000021067	Sav1	SAV1	0.0259	0.4558	ortholog_one2one	0.0568232
ENSMUSG00000042978	Sbk1	SBK1	0.0277	1.0488	ortholog_one2one	0.0264111
ENSMUSG00000038095	Sbno1	SBNO1	0.0113	0.5513	ortholog_one2one	0.020497
ENSMUSG00000033228	Scaf11	SCAF11	0.1796	0.6613	ortholog_one2one	0.271586
ENSMUSG00000046201	Scaf8	SCAF8	0.0418	0.4557	ortholog_one2one	0.091727
ENSMUSG00000113949	Scamp4	SCAMP4	NA	NA	ortholog_one2one	NA
ENSMUSG00000034007	Scaper	SCAPER	0.0618	0.4197	ortholog_one2one	0.147248
ENSMUSG00000000037	Scml2	SCML2	NA	NA	ortholog_one2one	NA
ENSMUSG00000022568	Scrib	SCRIB	0.0679	0.9286	ortholog_one2one	0.0731208
ENSMUSG00000029415	Sdad1	SDAD1	0.0299	0.578	ortholog_one2one	0.0517301
ENSMUSG00000017009	Sdc4	SDC4	0.1186	0.8017	ortholog_one2one	0.147936
ENSMUSG00000028249	Sdcbp	SDCBP	0.0519	0.521	ortholog_one2one	0.0996161
ENSMUSG00000038806	Sde2	SDE2	0.2019	0.6166	ortholog_one2one	0.327441
ENSMUSG00000058076	Sdhc	SDHC	0.128	0.3827	ortholog_one2one	0.334466
ENSMUSG00000025724	Sec11a	SEC11A	0.0963	0.6083	ortholog_one2one	0.15831
ENSMUSG00000027879	Sec22b	SEC22B	0	0	ortholog_one2one	NA
ENSMUSG00000020986	Sec23a	SEC23A	0.0048	0.4276	ortholog_one2one	0.0112254
ENSMUSG00000027429	Sec23b	SEC23B	0.0138	0.3954	ortholog_one2one	0.0349014
ENSMUSG00000055319	Sec23ip	SEC23IP	0.0692	0.5522	ortholog_one2one	0.125317
ENSMUSG00000039234	Sec24d	SEC24D	0.067	0.6474	ortholog_one2one	0.103491
ENSMUSG00000030082	Sec61a1	SEC61A1	0	0	ortholog_one2one	NA
ENSMUSG00000027706	Sec62	SEC62	0.0292	0.354	ortholog_one2one	0.0824859
ENSMUSG00000037072	Selenof	SELENOF	NA	NA	ortholog_one2one	NA
ENSMUSG00000042682	Selenok	SELENOK	NA	NA	ortholog_one2one	NA
ENSMUSG00000021451	Sema4d	SEMA4D	0.0786	0.8368	ortholog_one2one	0.0939293
ENSMUSG00000033075	Senp1	SENP1	0.0612	0.4639	ortholog_one2one	0.131925
ENSMUSG00000058013	Sept11	SEPTIN11	0.0238	0.8223	ortholog_one2one	0.0289432
ENSMUSG00000036371	Serbp1	SERBP1	0.007	0.2558	ortholog_one2one	0.0273651
ENSMUSG00000017707	Serinc3	SERINC3	0.1295	0.5107	ortholog_one2one	0.253574
ENSMUSG00000021703	Serinc5	SERINC5	0.1075	0.5973	ortholog_one2one	0.179977
ENSMUSG00000026249	Serpine2	SERPINE2	0.0815	0.5703	ortholog_one2one	0.142907
ENSMUSG00000070436	Serpinh1	SERPINH1	0.0232	0.9925	ortholog_one2one	0.0233753
ENSMUSG00000055200	Sertad3	SERTAD3	0.0783	0.5633	ortholog_one2one	0.139002
ENSMUSG00000016262	Sertad4	SERTAD4	0.0991	0.5057	ortholog_one2one	0.195966
ENSMUSG00000032009	Sesn3	SESN3	0.029	0.4943	ortholog_one2one	0.0586688
ENSMUSG00000056770	Setd3	SETD3	0.0398	0.4925	ortholog_one2one	0.0808122
ENSMUSG00000034269	Setd5	SETD5	0.0312	0.2325	ortholog_one2one	0.134194
ENSMUSG00000015697	Setdb1	SETDB1	0.0406	0.4002	ortholog_one2one	0.101449
ENSMUSG00000043535	Setx	SETX	0.1783	0.5464	ortholog_one2one	0.326318
ENSMUSG00000024949	Sf1	SF1	0.0315	0.3613	ortholog_one2one	0.0871852
ENSMUSG00000002129	Sf3a1	SF3A1	0.0079	0.4321	ortholog_one2one	0.0182828
ENSMUSG00000025982	Sf3b1	SF3B1	0	0	ortholog_one2one	NA
ENSMUSG00000033732	Sf3b3	SF3B3	0.0004	0.4335	ortholog_one2one	0.000922722
ENSMUSG00000037361	Sf3b6	SF3B6	0	0	ortholog_one2one	NA
ENSMUSG00000006527	Sfmbt1	SFMBT1	0.0585	0.4435	ortholog_one2one	0.131905
ENSMUSG00000061186	Sfmbt2	SFMBT2	0.1482	0.7059	ortholog_one2one	0.209945
ENSMUSG00000028820	Sfpq	SFPQ	0.0298	0.457	ortholog_one2one	0.0652079
ENSMUSG00000025066	Sfr1	SFR1	0.3879	0.838	ortholog_one2one	0.462888
ENSMUSG00000031548	Sfrp1	SFRP1	0.0218	0.5492	ortholog_one2one	0.0396941
ENSMUSG00000027996	Sfrp2	SFRP2	0.0081	0.4897	ortholog_one2one	0.0165407
ENSMUSG00000019970	Sgk1	SGK1	0.0269	0.5392	ortholog_one2one	0.0498887
ENSMUSG00000025915	Sgk3	SGK3	0.017	0.4381	ortholog_one2one	0.0388039
ENSMUSG00000020097	Sgpl1	SGPL1	0.0872	0.5056	ortholog_one2one	0.172468
ENSMUSG00000021054	Sgpp1	SGPP1	0.1065	0.5287	ortholog_one2one	0.201437
ENSMUSG00000042303	Sgsm3	SGSM3	0.0312	0.657	ortholog_one2one	0.0474886
ENSMUSG00000004937	Sgta	SGTA	0.0532	1.9571	ortholog_one2one	0.0271831
ENSMUSG00000030733	Sh2b1	SH2B1	0.0452	0.4403	ortholog_one2one	0.102657
ENSMUSG00000032261	Sh3bgrl2	SH3BGRL2	0.0303	0.5284	ortholog_one2one	0.0573429
ENSMUSG00000036206	Sh3bp4	SH3BP4	0.0396	0.9397	ortholog_one2one	0.0421411
ENSMUSG00000042626	Shc1	SHC1	0.024	0.4022	ortholog_one2one	0.0596718
ENSMUSG00000042708	Shcbp1l	SHCBP1L	0.104	0.7878	ortholog_one2one	0.132013
ENSMUSG00000020534	Shmt1	SHMT1	0.0502	0.6812	ortholog_one2one	0.0736935
ENSMUSG00000025403	Shmt2	SHMT2	0.0316	0.5725	ortholog_one2one	0.0551965
ENSMUSG00000090112	Shprh	SHPRH	0.0781	0.4886	ortholog_one2one	0.159844
ENSMUSG00000029381	Shroom3	SHROOM3	0.18	0.7093	ortholog_one2one	0.253771
ENSMUSG00000068270	Shroom4	SHROOM4	0.1287	0.4311	ortholog_one2one	0.298539
ENSMUSG00000036432	Siah2	SIAH2	0.0084	0.3183	ortholog_one2one	0.0263902
ENSMUSG00000034135	Sik3	SIK3	0.0468	0.4088	ortholog_one2one	0.114481
ENSMUSG00000031622	Sin3b	SIN3B	0.0407	1.4092	ortholog_one2one	0.0288816
ENSMUSG00000056917	Sipa1	SIPA1	0.0513	0.7519	ortholog_one2one	0.0682272
ENSMUSG00000001995	Sipa1l2	SIPA1L2	0.0425	0.9609	ortholog_one2one	0.0442294
ENSMUSG00000030583	Sipa1l3	SIPA1L3	0.0407	0.8571	ortholog_one2one	0.0474857
ENSMUSG00000020063	Sirt1	SIRT1	0.0826	0.4263	ortholog_one2one	0.19376
ENSMUSG00000051367	Six1	SIX1	0.003	0.4309	ortholog_one2one	0.00696217
ENSMUSG00000034460	Six4	SIX4	0.0448	0.3292	ortholog_one2one	0.136087
ENSMUSG00000059182	Skap2	SKAP2	0.0489	0.4766	ortholog_one2one	0.102602
ENSMUSG00000029050	Ski	SKI	0.0345	0.8258	ortholog_one2one	0.0417777
ENSMUSG00000027660	Skil	SKIL	0.0568	0.6028	ortholog_one2one	0.0942269
ENSMUSG00000036309	Skp1a	SKP1	0.0027	0.2673	ortholog_one2one	0.010101
ENSMUSG00000004642	Slbp	SLBP	0.0611	0.6677	ortholog_one2one	0.0915082
ENSMUSG00000024597	Slc12a2	SLC12A2	0.031	0.4008	ortholog_one2one	0.0773453
ENSMUSG00000017756	Slc12a7	SLC12A7	0.0459	1.2641	ortholog_one2one	0.0363104
ENSMUSG00000032902	Slc16a1	SLC16A1	0.0751	0.5563	ortholog_one2one	0.134999
ENSMUSG00000027397	Slc20a1	SLC20A1	0.0455	0.3613	ortholog_one2one	0.125934
ENSMUSG00000027340	Slc23a2	SLC23A2	0.0258	0.5336	ortholog_one2one	0.0483508
ENSMUSG00000035183	Slc24a5	SLC24A5	0.0844	0.5706	ortholog_one2one	0.147914
ENSMUSG00000019082	Slc25a22	SLC25A22	0.0195	0.8019	ortholog_one2one	0.0243172
ENSMUSG00000045100	Slc25a26	SLC25A26	0.0718	0.5615	ortholog_one2one	0.127872
ENSMUSG00000069041	Slc25a31	SLC25A31	0.0592	0.5261	ortholog_one2one	0.112526
ENSMUSG00000028982	Slc25a33	SLC25A33	0.046	0.5024	ortholog_one2one	0.0915605
ENSMUSG00000032449	Slc25a36	SLC25A36	0.0201	0.3576	ortholog_one2one	0.0562081
ENSMUSG00000018677	Slc25a39	SLC25A39	0.0591	0.5871	ortholog_one2one	0.100664
ENSMUSG00000037434	Slc30a1	SLC30A1	0.0984	0.6294	ortholog_one2one	0.156339
ENSMUSG00000054414	Slc30a7	SLC30A7	0.0268	0.4402	ortholog_one2one	0.0608814
ENSMUSG00000029221	Slc30a9	SLC30A9	0.0573	0.469	ortholog_one2one	0.122175
ENSMUSG00000042202	Slc35e2	SLC35E2B	0.0759	1.0907	ortholog_one2one	0.0695883
ENSMUSG00000057060	Slc35f3	SLC35F3	0.0651	0.6695	ortholog_one2one	0.0972367
ENSMUSG00000026342	Slc35f5	SLC35F5	0.0291	0.5027	ortholog_one2one	0.0578874
ENSMUSG00000024270	Slc39a6	SLC39A6	0.0667	0.6356	ortholog_one2one	0.10494
ENSMUSG00000010095	Slc3a2	SLC3A2	0.1919	0.7738	ortholog_one2one	0.247997
ENSMUSG00000089774	Slc5a3	SLC5A3	0.0345	0.3065	ortholog_one2one	0.112561
ENSMUSG00000041313	Slc7a1	SLC7A1	0.0768	0.6818	ortholog_one2one	0.112643
ENSMUSG00000031596	Slc7a2	SLC7A2	0.0466	0.5298	ortholog_one2one	0.0879577
ENSMUSG00000040010	Slc7a5	SLC7A5	0.0391	1.3004	ortholog_one2one	0.0300677
ENSMUSG00000022180	Slc7a8	SLC7A8	0.0574	0.4182	ortholog_one2one	0.137255
ENSMUSG00000020733	Slc9a3r1	SLC9A3R1	0.0622	0.7953	ortholog_one2one	0.0782095
ENSMUSG00000060681	Slc9a6	SLC9A6	0.0174	0.3541	ortholog_one2one	0.0491387
ENSMUSG00000036097	Slf2	SLF2	0.0842	0.3486	ortholog_one2one	0.241538
ENSMUSG00000056427	Slit3	SLIT3	0.0284	0.6564	ortholog_one2one	0.0432663
ENSMUSG00000025060	Slk	SLK	0.0943	0.5638	ortholog_one2one	0.167258
ENSMUSG00000021870	Slmap	SLMAP	0.0262	0.2994	ortholog_one2one	0.0875084
ENSMUSG00000032212	Sltm	SLTM	0.0421	0.4273	ortholog_one2one	0.0985256
ENSMUSG00000024563	Smad2	SMAD2	0.002	0.3498	ortholog_one2one	0.00571755
ENSMUSG00000024515	Smad4	SMAD4	0.0101	0.3899	ortholog_one2one	0.0259041
ENSMUSG00000021540	Smad5	SMAD5	0.005	0.3864	ortholog_one2one	0.01294
ENSMUSG00000025880	Smad7	SMAD7	0.0083	0.1989	ortholog_one2one	0.0417295
ENSMUSG00000026155	Smap1	SMAP1	0.0366	0.3153	ortholog_one2one	0.11608
ENSMUSG00000031715	Smarca5	SMARCA5	0.0109	0.429	ortholog_one2one	0.0254079
ENSMUSG00000029920	Smarcad1	SMARCAD1	0.0356	0.5421	ortholog_one2one	0.0656705
ENSMUSG00000032481	Smarcc1	SMARCC1	0.0225	0.4982	ortholog_one2one	0.0451626
ENSMUSG00000023018	Smarcd1	SMARCD1	0.0027	0.2999	ortholog_one2one	0.009003
ENSMUSG00000078619	Smarcd2	SMARCD2	0.0078	0.449	ortholog_one2one	0.0173719
ENSMUSG00000028312	Smc2	SMC2	0.0414	0.4924	ortholog_one2one	0.084078
ENSMUSG00000024974	Smc3	SMC3	0.0005	0.5359	ortholog_one2one	0.00093301
ENSMUSG00000020608	Smc6	SMC6	0.0436	0.5261	ortholog_one2one	0.082874
ENSMUSG00000024054	Smchd1	SMCHD1	0.0714	0.562	ortholog_one2one	0.127046
ENSMUSG00000038290	Smg6	SMG6	0.0486	0.396	ortholog_one2one	0.122727
ENSMUSG00000042772	Smg7	SMG7	0.0426	0.2278	ortholog_one2one	0.187006
ENSMUSG00000020495	Smg8	SMG8	0.0202	0.4805	ortholog_one2one	0.0420395
ENSMUSG00000091264	Smim13	SMIM13	0.0511	0.3668	ortholog_one2one	0.139313
ENSMUSG00000037822	Smim14	SMIM14	0.0502	0.9051	ortholog_one2one	0.0554635
ENSMUSG00000071180	Smim15	SMIM15	0.0062	0.4322	ortholog_one2one	0.0143452
ENSMUSG00000025024	Smndc1	SMNDC1	0.0019	0.6413	ortholog_one2one	0.00296273
ENSMUSG00000038780	Smurf1	SMURF1	0.0068	0.6909	ortholog_one2one	0.00984223
ENSMUSG00000018363	Smurf2	SMURF2	0.0036	0.3836	ortholog_one2one	0.00938478
ENSMUSG00000055067	Smyd3	SMYD3	0.0306	0.6629	ortholog_one2one	0.0461608
ENSMUSG00000042821	Snai1	SNAI1	0.0665	0.9699	ortholog_one2one	0.0685638
ENSMUSG00000027287	Snap23	SNAP23	0.0678	0.3562	ortholog_one2one	0.190343
ENSMUSG00000028483	Snapc3	SNAPC3	0.0862	0.5517	ortholog_one2one	0.156244
ENSMUSG00000050213	Snip1	SNIP1	0.0761	0.6031	ortholog_one2one	0.126181
ENSMUSG00000003660	Snrnp200	SNRNP200	0.0015	0.5185	ortholog_one2one	0.00289296
ENSMUSG00000074088	Snrnp40	SNRNP40	0.0079	0.5291	ortholog_one2one	0.014931
ENSMUSG00000027404	Snrpb	SNRPB	0.0066	0.3137	ortholog_one2one	0.0210392
ENSMUSG00000020180	Snrpd3	SNRPD3	0	0	ortholog_one2one	NA
ENSMUSG00000020018	Snrpf	SNRPF	0	0	ortholog_one2one	NA
ENSMUSG00000021039	Snw1	SNW1	0.0795	0.6071	ortholog_one2one	0.13095
ENSMUSG00000020876	Snx11	SNX11	0.0909	0.6458	ortholog_one2one	0.140756
ENSMUSG00000046032	Snx12	SNX12	0.0083	0.3154	ortholog_one2one	0.0263158
ENSMUSG00000042364	Snx18	SNX18	0.0779	1.4701	ortholog_one2one	0.0529896
ENSMUSG00000038291	Snx25	SNX25	0.0709	0.5142	ortholog_one2one	0.137884
ENSMUSG00000028136	Snx27	SNX27	0.0061	0.257	ortholog_one2one	0.0237354
ENSMUSG00000019804	Snx3	SNX3	0	0	ortholog_one2one	NA
ENSMUSG00000032733	Snx33	SNX33	0.0227	0.7226	ortholog_one2one	0.0314143
ENSMUSG00000022808	Snx4	SNX4	0.0312	0.4624	ortholog_one2one	0.067474
ENSMUSG00000027423	Snx5	SNX5	0.0082	0.3951	ortholog_one2one	0.0207542
ENSMUSG00000005656	Snx6	SNX6	0.0022	0.5535	ortholog_one2one	0.00397471
ENSMUSG00000026600	Soat1	SOAT1	0.074	0.6157	ortholog_one2one	0.120188
ENSMUSG00000037104	Socs5	SOCS5	0.0262	0.5856	ortholog_one2one	0.0447404
ENSMUSG00000022961	Son	SON	0.0722	0.2987	ortholog_one2one	0.241714
ENSMUSG00000063632	Sox11	SOX11	0.0509	1.0896	ortholog_one2one	0.0467144
ENSMUSG00000070643	Sox13	SOX13	0.0475	0.62	ortholog_one2one	0.0766129
ENSMUSG00000045179	Sox3	SOX3	0.0335	0.5576	ortholog_one2one	0.0600789
ENSMUSG00000040489	Sox30	SOX30	0.1321	0.3653	ortholog_one2one	0.361621
ENSMUSG00000076431	Sox4	SOX4	0.0967	1.3935	ortholog_one2one	0.0693936
ENSMUSG00000001280	Sp1	SP1	0.0221	0.2492	ortholog_one2one	0.0886838
ENSMUSG00000027109	Sp3	SP3	0.0257	0.1928	ortholog_one2one	0.133299
ENSMUSG00000025323	Sp4	SP4	0.0125	0.2739	ortholog_one2one	0.0456371
ENSMUSG00000024068	Spast	SPAST	0.0414	0.3978	ortholog_one2one	0.104072
ENSMUSG00000047030	Spata2	SPATA2	0.073	0.7266	ortholog_one2one	0.100468
ENSMUSG00000027722	Spata5	SPATA5	0.0872	0.4604	ortholog_one2one	0.189401
ENSMUSG00000005233	Spc25	SPC25	0.137	0.7106	ortholog_one2one	0.192795
ENSMUSG00000035227	Spcs2	SPCS2	0.0235	0.3588	ortholog_one2one	0.0654961
ENSMUSG00000032388	Spg21	SPG21	0.0088	0.7085	ortholog_one2one	0.0124206
ENSMUSG00000041974	Spidr	SPIDR	0.2439	0.5322	ortholog_one2one	0.458286
ENSMUSG00000021395	Spin1	SPIN1	0.0037	0.2915	ortholog_one2one	0.012693
ENSMUSG00000074227	Spint2	SPINT2	0.1707	0.8682	ortholog_one2one	0.196614
ENSMUSG00000029550	Sppl3	SPPL3	0	0	ortholog_one2one	NA
ENSMUSG00000027351	Spred1	SPRED1	0.0311	0.3177	ortholog_one2one	0.0978911
ENSMUSG00000057738	Sptan1	SPTAN1	0.0076	0.6295	ortholog_one2one	0.0120731
ENSMUSG00000020315	Sptbn1	SPTBN1	0.0077	0.5493	ortholog_one2one	0.0140178
ENSMUSG00000044408	Sptssa	SPTSSA	0.0059	0.9829	ortholog_one2one	0.00600265
ENSMUSG00000015837	Sqstm1	SQSTM1	0.0461	0.5697	ortholog_one2one	0.0809198
ENSMUSG00000020538	Srebf1	SREBF1	0.1104	0.762	ortholog_one2one	0.144882
ENSMUSG00000022463	Srebf2	SREBF2	0.0379	0.5618	ortholog_one2one	0.0674617
ENSMUSG00000009549	Srp14	SRP14	0.0434	0.7989	ortholog_one2one	0.0543247
ENSMUSG00000026511	Srp9	SRP9	0.038	0.5521	ortholog_one2one	0.0688281
ENSMUSG00000062604	Srpk2	SRPK2	0.0393	0.3912	ortholog_one2one	0.10046
ENSMUSG00000028809	Srrm1	SRRM1	0.0208	0.4439	ortholog_one2one	0.0468574
ENSMUSG00000039218	Srrm2	SRRM2	0.0781	0.5164	ortholog_one2one	0.151239
ENSMUSG00000037364	Srrt	SRRT	0.01	0.762	ortholog_one2one	0.0131234
ENSMUSG00000028676	Srsf10	SRSF10	0	0	ortholog_one2one	NA
ENSMUSG00000071172	Srsf3	SRSF3	0	0	ortholog_one2one	NA
ENSMUSG00000021134	Srsf5	SRSF5	0.0117	0.3292	ortholog_one2one	0.0355407
ENSMUSG00000016921	Srsf6	SRSF6	0.0136	0.5173	ortholog_one2one	0.0262904
ENSMUSG00000024097	Srsf7	SRSF7	0.008	0.3122	ortholog_one2one	0.0256246
ENSMUSG00000029538	Srsf9	SRSF9	0.0103	0.2917	ortholog_one2one	0.0353103
ENSMUSG00000068882	Ssb	SSB	0.0959	0.5761	ortholog_one2one	0.166464
ENSMUSG00000061887	Ssbp3	SSBP3	0	0	ortholog_one2one	NA
ENSMUSG00000037926	Ssh2	SSH2	0.1188	0.4234	ortholog_one2one	0.280586
ENSMUSG00000027828	Ssr3	SSR3	0.0051	0.3768	ortholog_one2one	0.013535
ENSMUSG00000027067	Ssrp1	SSRP1	0.0102	0.7056	ortholog_one2one	0.0144558
ENSMUSG00000029038	Ssu72	SSU72	0.0047	0.5341	ortholog_one2one	0.00879985
ENSMUSG00000036825	Ssx2ip	SSX2IP	0.0627	0.789	ortholog_one2one	0.0794677
ENSMUSG00000022403	St13	ST13	0.0268	0.3953	ortholog_one2one	0.0677966
ENSMUSG00000032038	St3gal4	ST3GAL4	0.046	0.6525	ortholog_one2one	0.0704981
ENSMUSG00000037286	Stag1	STAG1	0.0028	0.3683	ortholog_one2one	0.0076025
ENSMUSG00000025862	Stag2	STAG2	0.0038	0.296	ortholog_one2one	0.0128378
ENSMUSG00000026718	Stam	STAM	0.0372	0.4427	ortholog_one2one	0.0840298
ENSMUSG00000055371	Stam2	STAM2	0.0719	0.4702	ortholog_one2one	0.152914
ENSMUSG00000003062	Stard3nl	STARD3NL	0.0685	0.4934	ortholog_one2one	0.138833
ENSMUSG00000024378	Stard4	STARD4	0.0628	0.6157	ortholog_one2one	0.101998
ENSMUSG00000027367	Stard7	STARD7	0.0411	0.407	ortholog_one2one	0.100983
ENSMUSG00000004040	Stat3	STAT3	0.0006	0.5126	ortholog_one2one	0.0011705
ENSMUSG00000004043	Stat5a	STAT5A	0.0627	0.837	ortholog_one2one	0.0749104
ENSMUSG00000002147	Stat6	STAT6	0.0708	0.5317	ortholog_one2one	0.133158
ENSMUSG00000039536	Stau1	STAU1	0.0459	0.5164	ortholog_one2one	0.0888846
ENSMUSG00000024966	Stip1	STIP1	0.0172	0.7495	ortholog_one2one	0.0229486
ENSMUSG00000026213	Stk11ip	STK11IP	0.1563	0.5727	ortholog_one2one	0.272918
ENSMUSG00000026094	Stk17b	STK17B	0.041	0.612	ortholog_one2one	0.0669935
ENSMUSG00000063410	Stk24	STK24	0.0271	0.8081	ortholog_one2one	0.0335355
ENSMUSG00000023403	Stk31	STK31	0.1175	0.4374	ortholog_one2one	0.268633
ENSMUSG00000037885	Stk35	STK35	0.0648	0.287	ortholog_one2one	0.225784
ENSMUSG00000018209	Stk4	STK4	0.0124	0.4397	ortholog_one2one	0.028201
ENSMUSG00000038143	Stox2	STOX2	0.0214	0.5667	ortholog_one2one	0.0377625
ENSMUSG00000030224	Strap	STRAP	0.0105	0.4871	ortholog_one2one	0.0215561
ENSMUSG00000024077	Strn	STRN	0.0161	0.4409	ortholog_one2one	0.0365162
ENSMUSG00000030374	Strn4	STRN4	0.0261	0.6442	ortholog_one2one	0.0405154
ENSMUSG00000032437	Stt3b	STT3B	0.0096	0.4295	ortholog_one2one	0.0223516
ENSMUSG00000028879	Stx12	STX12	0.0358	0.3637	ortholog_one2one	0.0984328
ENSMUSG00000041488	Stx3	STX3	0.0092	0.448	ortholog_one2one	0.0205357
ENSMUSG00000030805	Stx4a	STX4	0.0473	0.7404	ortholog_one2one	0.0638844
ENSMUSG00000026470	Stx6	STX6	0.029	0.3363	ortholog_one2one	0.0862325
ENSMUSG00000019998	Stx7	STX7	0.0298	0.604	ortholog_one2one	0.0493377
ENSMUSG00000022205	Sub1	SUB1	0.0315	0.7464	ortholog_one2one	0.0422026
ENSMUSG00000040297	Suco	SUCO	0.0717	0.4127	ortholog_one2one	0.173734
ENSMUSG00000066900	Suds3	SUDS3	0.0175	0.9	ortholog_one2one	0.0194444
ENSMUSG00000016918	Sulf1	SULF1	0.0364	0.6558	ortholog_one2one	0.0555047
ENSMUSG00000026021	Sumo1	SUMO1	0	0	ortholog_one2one	NA
ENSMUSG00000020265	Sumo3	SUMO3	0.0728	1.8447	ortholog_one2one	0.0394644
ENSMUSG00000036817	Sun1	SUN1	0.2032	0.8829	ortholog_one2one	0.230151
ENSMUSG00000035726	Supt16	SUPT16H	0.0058	0.4737	ortholog_one2one	0.012244
ENSMUSG00000014873	Surf2	SURF2	0.192	1.5297	ortholog_one2one	0.125515
ENSMUSG00000014867	Surf4	SURF4	0.0034	0.6312	ortholog_one2one	0.00538657
ENSMUSG00000036160	Surf6	SURF6	0.1579	1.3428	ortholog_one2one	0.11759
ENSMUSG00000021133	Susd6	SUSD6	0.0588	0.359	ortholog_one2one	0.163788
ENSMUSG00000017548	Suz12	SUZ12	0.0132	0.3145	ortholog_one2one	0.0419714
ENSMUSG00000044627	Swi5	SWI5	0.3044	1.0057	ortholog_one2one	0.302675
ENSMUSG00000052748	Swt1	SWT1	0.1677	0.3792	ortholog_one2one	0.442247
ENSMUSG00000031357	Syap1	SYAP1	0.0866	0.6845	ortholog_one2one	0.126516
ENSMUSG00000003824	Syce2	SYCE2	0.1877	0.9838	ortholog_one2one	0.190791
ENSMUSG00000027855	Sycp1	SYCP1	0.1477	0.3942	ortholog_one2one	0.374683
ENSMUSG00000020059	Sycp3	SYCP3	0.1715	0.2809	ortholog_one2one	0.610538
ENSMUSG00000028821	Syf2	SYF2	0.0434	1.0113	ortholog_one2one	0.0429151
ENSMUSG00000009394	Syn2	SYN2	0.0281	0.4289	ortholog_one2one	0.0655164
ENSMUSG00000032423	Syncrip	SYNCRIP	0.0014	0.1569	ortholog_one2one	0.00892288
ENSMUSG00000063450	Syne2	SYNE2	NA	NA	ortholog_one2one	NA
ENSMUSG00000020570	Sypl	SYPL1	0.1074	0.4525	ortholog_one2one	0.237348
ENSMUSG00000035476	Tab3	TAB3	0.0232	0.2626	ortholog_one2one	0.0883473
ENSMUSG00000037343	Taf2	TAF2	0.0214	0.5628	ortholog_one2one	0.0380242
ENSMUSG00000039117	Taf4	TAF4	0.0806	0.4903	ortholog_one2one	0.164389
ENSMUSG00000054321	Taf4b	TAF4B	0.1199	0.3421	ortholog_one2one	0.350482
ENSMUSG00000025049	Taf5	TAF5	0.0156	0.3296	ortholog_one2one	0.0473301
ENSMUSG00000051316	Taf7	TAF7	0.0227	0.5897	ortholog_one2one	0.0384941
ENSMUSG00000047242	Taf9b	TAF9B	0.0474	0.236	ortholog_one2one	0.200847
ENSMUSG00000030316	Tamm41	TAMM41	0.0993	0.7133	ortholog_one2one	0.139212
ENSMUSG00000035168	Tanc1	TANC1	0.0568	0.5012	ortholog_one2one	0.113328
ENSMUSG00000017291	Taok1	TAOK1	0.0028	0.3118	ortholog_one2one	0.00898012
ENSMUSG00000024308	Tapbp	TAPBP	0.1846	0.7224	ortholog_one2one	0.255537
ENSMUSG00000090290	Tarbp1	TARBP1	0.1728	0.8323	ortholog_one2one	0.207617
ENSMUSG00000041459	Tardbp	TARDBP	0.0178	0.4581	ortholog_one2one	0.0388561
ENSMUSG00000022241	Tars	TARS	0.0271	0.6924	ortholog_one2one	0.0391392
ENSMUSG00000039033	Tasp1	TASP1	0.0264	0.2739	ortholog_one2one	0.0963855
ENSMUSG00000029174	Tbc1d1	TBC1D1	0.0515	0.6989	ortholog_one2one	0.0736872
ENSMUSG00000042492	Tbc1d10b	TBC1D10B	0.053	0.4941	ortholog_one2one	0.107266
ENSMUSG00000039678	Tbc1d13	TBC1D13	0.0134	0.5869	ortholog_one2one	0.0228318
ENSMUSG00000029192	Tbc1d14	TBC1D14	0.0499	0.5226	ortholog_one2one	0.0954841
ENSMUSG00000027465	Tbc1d20	TBC1D20	0.0347	0.42	ortholog_one2one	0.082619
ENSMUSG00000042203	Tbc1d22b	TBC1D22B	0.0055	0.5835	ortholog_one2one	0.00942588
ENSMUSG00000037410	Tbc1d2b	TBC1D2B	0.0581	0.5516	ortholog_one2one	0.10533
ENSMUSG00000027630	Tbl1xr1	TBL1XR1	0.0044	0.4693	ortholog_one2one	0.00937567
ENSMUSG00000005374	Tbl2	TBL2	0.0594	0.7705	ortholog_one2one	0.0770928
ENSMUSG00000014767	Tbp	TBP	0.0152	0.5083	ortholog_one2one	0.0299036
ENSMUSG00000071359	Tbpl1	TBPL1	0	0	ortholog_one2one	NA
ENSMUSG00000024498	Tcerg1	TCERG1	0.0104	0.3548	ortholog_one2one	0.0293123
ENSMUSG00000032228	Tcf12	TCF12	0.0209	0.3241	ortholog_one2one	0.0644863
ENSMUSG00000020167	Tcf3	TCF3	0.0903	0.9867	ortholog_one2one	0.0915172
ENSMUSG00000053477	Tcf4	TCF4	0.0097	0.3083	ortholog_one2one	0.0314629
ENSMUSG00000000782	Tcf7	TCF7	0.0209	0.3735	ortholog_one2one	0.0559572
ENSMUSG00000038932	Tcfl5	TCFL5	0.0704	0.4085	ortholog_one2one	0.172338
ENSMUSG00000024613	Tcof1	TCOF1	0.3331	0.6819	ortholog_one2one	0.488488
ENSMUSG00000035958	Tdp2	TDP2	0.2157	0.4468	ortholog_one2one	0.482766
ENSMUSG00000025081	Tdrd1	TDRD1	0.1773	0.7604	ortholog_one2one	0.233167
ENSMUSG00000060985	Tdrd5	TDRD5	0.1245	0.4959	ortholog_one2one	0.251059
ENSMUSG00000035517	Tdrd7	TDRD7	0.0865	0.5919	ortholog_one2one	0.14614
ENSMUSG00000054003	Tdrd9	TDRD9	0.0765	0.7163	ortholog_one2one	0.106799
ENSMUSG00000041912	Tdrkh	TDRKH	0.0458	0.3111	ortholog_one2one	0.14722
ENSMUSG00000055320	Tead1	TEAD1	0.0034	0.4153	ortholog_one2one	0.00818685
ENSMUSG00000025925	Terf1	TERF1	0.2267	0.451	ortholog_one2one	0.502661
ENSMUSG00000028345	Tex10	TEX10	0.0601	0.308	ortholog_one2one	0.19513
ENSMUSG00000042386	Tex13b	TEX13B	0.3725	2.5519	ortholog_one2one	0.14597
ENSMUSG00000010342	Tex14	TEX14	0.2073	0.4585	ortholog_one2one	0.452126
ENSMUSG00000003923	Tfam	TFAM	0.2484	0.9501	ortholog_one2one	0.261446
[truncated: 9,378 more rows]

## Sheet: Mouse human orthologs
Gene.name	Transcript.stable.ID	Gene.stable.ID	Gene.stable.ID.version	Transcript.stable.ID.version	Human.gene.name	Human.gene.stable.ID	Human.protein.or.transcript.stable.ID	Human.orthology.confidence..0.low..1.high.	dN.with.Human	dS.with.Human	Human.Gene.order.conservation.score	X.id..query.gene.identical.to.target.Human.gene	X.id..target.Human.gene.identical.to.query.gene	Human.homology.type	RefSeq.mRNA.ID	DAZL.target
1110004F10Rik	ENSMUST00000032899	ENSMUSG00000030663	ENSMUSG00000030663.12	ENSMUST00000032899.11	C11orf58	ENSG00000110696	ENSP00000228136	1	0.0203	0.8821	100	95.082	96.1326	ortholog_one2one	NM_019772	Dazl.target
1700030K09Rik	ENSMUST00000064853	ENSMUSG00000052794	ENSMUSG00000052794.13	ENSMUST00000064853.12	C19orf44	ENSG00000105072	ENSP00000221671	0	0.378	0.942	100	48.2496	49.454	ortholog_one2one	NM_028170	Dazl.target
1700066M21Rik	ENSMUST00000042734	ENSMUSG00000038323	ENSMUSG00000038323.3	ENSMUST00000042734.2	C2orf69	ENSG00000178074	ENSP00000312770	1	0.1233	0.4554	100	75.3247	79.4521	ortholog_one2one	NM_028546	Dazl.target
1810013L24Rik	ENSMUST00000023150	ENSMUSG00000022507	ENSMUSG00000022507.6	ENSMUST00000023150.6	C16orf72	ENSG00000182831	ENSP00000331720	1	0.0069	0.0932	100	98.5455	98.5455	ortholog_one2one	NM_001081400	Dazl.target
2010300C02Rik	ENSMUST00000162875	ENSMUSG00000026090	ENSMUSG00000026090.16	ENSMUST00000162875.7	KIAA1211L	ENSG00000196872	ENSP00000380996	1	0.2163	0.9657	100	63.9293	52.3404	ortholog_one2one	NM_028096	Dazl.target
2310057M21Rik	ENSMUST00000059438	ENSMUSG00000040177	ENSMUSG00000040177.10	ENSMUST00000059438.10	C10orf88	ENSG00000119965	ENSP00000419126	1	0.1724	0.5359	100	70.7865	70.9459	ortholog_one2one	NM_026655	Dazl.target
2510039O18Rik	ENSMUST00000103232	ENSMUSG00000044496	ENSMUSG00000044496.6	ENSMUST00000103232.1	KIAA2013	ENSG00000116685	ENSP00000365756	1	0.039	0.889	100	90.8517	90.8517	ortholog_one2one	NM_029841	Dazl.target
2610001J05Rik	ENSMUST00000139231	ENSMUSG00000052419	ENSMUSG00000052419.7	ENSMUST00000139231.1	SMIM30	ENSG00000214194	ENSP00000490095	1	0.0675	0.6651	100	91.5254	91.5254	ortholog_one2one	NM_001352887	Dazl.target
2610301B20Rik	ENSMUST00000080517	ENSMUSG00000059482	ENSMUSG00000059482.15	ENSMUST00000080517.13	C8orf37	ENSG00000156172	ENSP00000286688	1	0.1107	0.3336	75	78.2609	77.512	ortholog_one2one	NM_026005	Dazl.target
4833420G17Rik	ENSMUST00000225186	ENSMUSG00000062822	ENSMUSG00000062822.8	ENSMUST00000225186.1	C5orf34	ENSG00000172244	ENSP00000303490	1	0.1422	0.6025	100	75.3919	75.2739	ortholog_one2one	NM_026127	Dazl.target
4833439L19Rik	ENSMUST00000153065	ENSMUSG00000025871	ENSMUSG00000025871.18	ENSMUST00000153065.7	KIAA1191	ENSG00000122203	ENSP00000298569	1	0.1113	0.3689	100	79.3443	79.868	ortholog_one2one	NM_001252646	Dazl.target
4930452B06Rik	ENSMUST00000102996	ENSMUSG00000021747	ENSMUSG00000021747.12	ENSMUST00000102996.3	C3orf67	ENSG00000163689	ENSP00000295966	1	0.156	0.6697	100	72.4689	60.5341	ortholog_one2one	NM_028934	Dazl.target
4930579G24Rik	ENSMUST00000029388	ENSMUSG00000027811	ENSMUSG00000027811.9	ENSMUST00000029388.9	C4orf46	ENSG00000205208	ENSP00000368503	1	0.099	0.4344	100	82.3009	83.7838	ortholog_one2one	NM_029482	Dazl.target
4931406P16Rik	ENSMUST00000085592	ENSMUSG00000066571	ENSMUSG00000066571.13	ENSMUST00000085592.5	KIAA0355	ENSG00000166398	ENSP00000299505	1	0.03	0.3479	100	92.8037	93.7677	ortholog_one2one	NM_172741	Dazl.target
4931428F04Rik	ENSMUST00000014981	ENSMUSG00000014837	ENSMUSG00000014837.15	ENSMUST00000014981.7	KIAA0895L	ENSG00000196123	ENSP00000290881	1	0.087	0.598	100	83.2272	83.94	ortholog_one2one	NM_001166394	Dazl.target
4932438A13Rik	ENSMUST00000057272	ENSMUSG00000037270	ENSMUSG00000037270.18	ENSMUST00000057272.14	KIAA1109	ENSG00000138688	ENSP00000264501	1	0.0157	0.4516	100	96.6633	96.6633	ortholog_one2one	NM_172679	Dazl.target
5031439G07Rik	ENSMUST00000165743	ENSMUSG00000036046	ENSMUSG00000036046.14	ENSMUST00000165743.1	KIAA0930	ENSG00000100364	ENSP00000251993	1	0.0484	0.8538	100	91.198	83.4452	ortholog_one2one	NM_001033273	Dazl.target
9530068E07Rik	ENSMUST00000036952	ENSMUSG00000036275	ENSMUSG00000036275.13	ENSMUST00000036952.4	C5orf15	ENSG00000113583	ENSP00000231512	1	0.2728	1.2633	100	61.8868	63.3205	ortholog_one2one	NM_153117	Dazl.target
9930021J03Rik	ENSMUST00000175726	ENSMUSG00000046138	ENSMUSG00000046138.15	ENSMUST00000175726.7	KIAA2026	ENSG00000183354	ENSP00000382815	1	0.1084	0.3457	75	74.9881	79.9696	ortholog_one2one	NM_172836	Dazl.target
Aamp	ENSMUST00000006462	ENSMUSG00000006299	ENSMUSG00000006299.13	ENSMUST00000006462.13	AAMP	ENSG00000127837	ENSP00000403343	1	0.0066	0.5122	100	98.6207	98.3945	ortholog_one2one	NM_146110	Dazl.target
Aasdhppt	ENSMUST00000051589	ENSMUSG00000025894	ENSMUSG00000025894.11	ENSMUST00000051589.8	AASDHPPT	ENSG00000149313	ENSP00000278618	1	0.042	0.578	100	89.9676	89.9676	ortholog_one2one	NM_026276	Dazl.target
Abca1	ENSMUST00000030010	ENSMUSG00000015243	ENSMUSG00000015243.4	ENSMUST00000030010.3	ABCA1	ENSG00000165029	ENSP00000363868	1	0.0242	0.5052	100	95.3118	95.3118	ortholog_one2one	NM_013454	Dazl.target
Abcc5	ENSMUST00000079158	ENSMUSG00000022822	ENSMUSG00000022822.16	ENSMUST00000079158.12	ABCC5	ENSG00000114770	ENSP00000333926	1	0.0272	0.4719	100	94.9896	95.0557	ortholog_one2one	NM_013790	Dazl.target
Abcd3	ENSMUST00000029770	ENSMUSG00000028127	ENSMUSG00000028127.10	ENSMUST00000029770.7	ABCD3	ENSG00000117528	ENSP00000359233	1	0.023	0.4522	100	95.4476	95.4476	ortholog_one2one	NM_008991	Dazl.target
Abhd17a	ENSMUST00000003436	ENSMUSG00000003346	ENSMUSG00000003346.14	ENSMUST00000003436.11	ABHD17A	ENSG00000129968	ENSP00000250974	1	0.0338	1.0093	100	79.5014	92.5806	ortholog_one2one	NM_145421	Dazl.target
Abhd17c	ENSMUST00000117085	ENSMUSG00000038459	ENSMUSG00000038459.10	ENSMUST00000117085.1	ABHD17C	ENSG00000136379	ENSP00000258884	1	0.0134	0.5488	100	93.921	96.5625	ortholog_one2one	NM_133722	Dazl.target
Abhd2	ENSMUST00000037315	ENSMUSG00000039202	ENSMUSG00000039202.12	ENSMUST00000037315.12	ABHD2	ENSG00000140526	ENSP00000268129	1	0.0052	0.4768	100	98.8235	98.8235	ortholog_one2one	NM_018811	Dazl.target
Abi1	ENSMUST00000140164	ENSMUSG00000058835	ENSMUSG00000058835.14	ENSMUST00000140164.7	ABI1	ENSG00000136754	ENSP00000365312	1	0.0089	0.3252	75	93.1102	98.3368	ortholog_one2one	NM_007380	Dazl.target
Abl1	ENSMUST00000075759	ENSMUSG00000026842	ENSMUSG00000026842.16	ENSMUST00000075759.12	ABL1	ENSG00000097007	ENSP00000361423	1	0.0581	0.6658	100	88.0766	88.6165	ortholog_one2one	NM_001283046	Dazl.target
Abl2	ENSMUST00000027888	ENSMUSG00000026596	ENSMUSG00000026596.13	ENSMUST00000027888.12	ABL2	ENSG00000143322	ENSP00000427562	1	0.0272	0.3294	100	94.7547	94.7547	ortholog_one2one	NM_009595	Dazl.target
Abraxas1	ENSMUST00000055245	ENSMUSG00000035234	ENSMUSG00000035234.18	ENSMUST00000055245.12	ABRAXAS1	ENSG00000163322	ENSP00000369857	1	0.1755	0.7328	100	72.1271	72.4816	ortholog_one2one	NM_172405	Dazl.target
Acadm	ENSMUST00000072697	ENSMUSG00000062908	ENSMUSG00000062908.12	ENSMUST00000072697.12	ACADM	ENSG00000117054	ENSP00000359871	1	0.0634	0.923	100	81.2775	87.6485	ortholog_one2one	NM_007382	Dazl.target
Acbd3	ENSMUST00000027780	ENSMUSG00000026499	ENSMUSG00000026499.5	ENSMUST00000027780.5	ACBD3	ENSG00000182827	ENSP00000355777	1	0.0554	0.4622	100	89.0152	89.5238	ortholog_one2one	NM_133225	Dazl.target
Acly	ENSMUST00000007131	ENSMUSG00000020917	ENSMUSG00000020917.17	ENSMUST00000007131.15	ACLY	ENSG00000131473	ENSP00000466259	1	0.0087	0.5337	100	98.0926	98.0926	ortholog_one2one	NM_134037	Dazl.target
Aco1	ENSMUST00000102973	ENSMUSG00000028405	ENSMUSG00000028405.9	ENSMUST00000102973.3	ACO1	ENSG00000122729	ENSP00000309477	1	0.0349	0.5661	100	93.3633	93.3633	ortholog_one2one	NM_007386	Dazl.target
Aco2	ENSMUST00000023116	ENSMUSG00000022477	ENSMUSG00000022477.13	ENSMUST00000023116.6	ACO2	ENSG00000100412	ENSP00000216254	1	0.0158	0.5347	100	96.7949	96.7949	ortholog_one2one	NM_080633	Dazl.target
Acsl1	ENSMUST00000110372	ENSMUSG00000018796	ENSMUSG00000018796.13	ENSMUST00000110372.8	ACSL1	ENSG00000151726	ENSP00000422607	1	0.0807	0.4787	100	84.8138	84.6924	ortholog_one2one	NM_001302163	Dazl.target
Acsl3	ENSMUST00000142704	ENSMUSG00000032883	ENSMUSG00000032883.15	ENSMUST00000142704.7	ACSL3	ENSG00000123983	ENSP00000350012	1	0.0363	0.4565	100	92.7778	92.7778	ortholog_one2one	NM_001033606	Dazl.target
Acss2	ENSMUST00000029135	ENSMUSG00000027605	ENSMUSG00000027605.18	ENSMUST00000029135.14	ACSS2	ENSG00000131069	ENSP00000253382	1	0.0336	0.3329	100	91.8767	93.5806	ortholog_one2one	NM_019811	Dazl.target
Actb	ENSMUST00000100497	ENSMUSG00000029580	ENSMUSG00000029580.14	ENSMUST00000100497.10	ACTB	ENSG00000075624	ENSP00000494750	1	0	0	100	100	100	ortholog_one2one	NM_007393	Dazl.target
Actl6a	ENSMUST00000029214	ENSMUSG00000027671	ENSMUSG00000027671.14	ENSMUST00000029214.13	ACTL6A	ENSG00000136518	ENSP00000397552	1	0.0055	0.6364	100	98.8345	98.8345	ortholog_one2one	NM_019673	Dazl.target
Actn1	ENSMUST00000021554	ENSMUSG00000015143	ENSMUSG00000015143.15	ENSMUST00000021554.15	ACTN1	ENSG00000072110	ENSP00000377941	1	0.0039	0.5914	100	96.2801	98.6547	ortholog_one2one	NM_134156	Dazl.target
Actr10	ENSMUST00000021479	ENSMUSG00000021076	ENSMUSG00000021076.6	ENSMUST00000021479.5	ACTR10	ENSG00000131966	ENSP00000254286	1	0.0228	0.3706	50	95.2038	95.2038	ortholog_one2one	NM_019785	Dazl.target
Actr6	ENSMUST00000020109	ENSMUSG00000019948	ENSMUSG00000019948.4	ENSMUST00000020109.4	ACTR6	ENSG00000075089	ENSP00000188312	1	0.0068	0.6631	100	98.4848	98.4848	ortholog_one2one	NM_025914	Dazl.target
Acvr2b	ENSMUST00000215746	ENSMUSG00000061393	ENSMUSG00000061393.14	ENSMUST00000215746.1	ACVR2B	ENSG00000114739	ENSP00000340361	1	0.0025	0.4888	75	99.4141	94.9627	ortholog_one2one	NM_001313757	Dazl.target
Adal	ENSMUST00000028702	ENSMUSG00000027259	ENSMUSG00000027259.15	ENSMUST00000028702.9	ADAL	ENSG00000168803	ENSP00000456242	1	0.0978	0.4533	100	83.3803	82.2222	ortholog_one2one	NM_001290811	Dazl.target
Adam10	ENSMUST00000067880	ENSMUSG00000054693	ENSMUSG00000054693.14	ENSMUST00000067880.12	ADAM10	ENSG00000137845	ENSP00000260408	1	0.0181	0.4013	100	96.123	95.9947	ortholog_one2one	NM_007399	Dazl.target
Add3	ENSMUST00000237430	ENSMUSG00000025026	ENSMUSG00000025026.15	ENSMUST00000237430.1	ADD3	ENSG00000148700	ENSP00000348381	1	0.0394	0.5724	100	91.9263	91.9263	ortholog_one2one	NM_001277100	Dazl.target
Adgra3	ENSMUST00000030971	ENSMUSG00000029090	ENSMUSG00000029090.12	ENSMUST00000030971.6	ADGRA3	ENSG00000152990	ENSP00000334952	1	0.0364	0.6814	100	92.2029	92.9771	ortholog_one2one	NM_133911	Dazl.target
Adgrg1	ENSMUST00000093271	ENSMUSG00000031785	ENSMUSG00000031785.16	ENSMUST00000093271.7	ADGRG1	ENSG00000205336	ENSP00000455215	1	0.1146	1.0442	100	78.355	79.0393	ortholog_one2one	NM_018882	Dazl.target
Adi1	ENSMUST00000020957	ENSMUSG00000020629	ENSMUSG00000020629.12	ENSMUST00000020957.12	ADI1	ENSG00000182551	ENSP00000333666	1	0.0821	0.7994	100	83.2402	83.2402	ortholog_one2one	NM_134052	Dazl.target
Adipor2	ENSMUST00000032272	ENSMUSG00000030168	ENSMUSG00000030168.13	ENSMUST00000032272.12	ADIPOR2	ENSG00000006831	ENSP00000349616	1	0.0391	0.3589	50	92.7461	92.7461	ortholog_one2one	NM_001355692	Dazl.target
Adk	ENSMUST00000045376	ENSMUSG00000039197	ENSMUSG00000039197.10	ENSMUST00000045376.10	ADK	ENSG00000156110	ENSP00000443965	1	0.0464	0.3694	100	90.884	91.1357	ortholog_one2one	NM_134079	Dazl.target
Adnp	ENSMUST00000057793	ENSMUSG00000051149	ENSMUSG00000051149.15	ENSMUST00000057793.10	ADNP	ENSG00000101126	ENSP00000360662	1	0.0267	0.414	100	94.2831	93.7726	ortholog_one2one	NM_001310086	Dazl.target
Ado	ENSMUST00000075686	ENSMUSG00000057134	ENSMUSG00000057134.6	ENSMUST00000075686.6	ADO	ENSG00000181915	ENSP00000362888	1	0.0597	0.9163	100	84.8148	89.4531	ortholog_one2one	NM_001005419	Dazl.target
Adprh	ENSMUST00000002923	ENSMUSG00000002844	ENSMUSG00000002844.9	ENSMUST00000002923.9	ADPRH	ENSG00000144843	ENSP00000420200	1	0.1043	0.6625	100	82.0728	80.9392	ortholog_one2one	NM_007414	Dazl.target
Adss	ENSMUST00000016105	ENSMUSG00000015961	ENSMUSG00000015961.8	ENSMUST00000016105.8	ADSS	ENSG00000035687	ENSP00000355493	1	0.0161	0.3408	100	96.7105	96.7105	ortholog_one2one	NM_007422	Dazl.target
Aebp2	ENSMUST00000087614	ENSMUSG00000030232	ENSMUSG00000030232.18	ENSMUST00000087614.10	AEBP2	ENSG00000139154	ENSP00000381840	1	0.048	0.5475	100	87.8143	90.0794	ortholog_one2one	NM_001005605	Dazl.target
Afdn	ENSMUST00000139666	ENSMUSG00000068036	ENSMUSG00000068036.15	ENSMUST00000139666.7	AFDN	ENSG00000130396	ENSP00000355771	1	0.035	0.5177	100	92.9253	90.9341	ortholog_one2one	NM_010806	Dazl.target
Aff3	ENSMUST00000095027	ENSMUSG00000037138	ENSMUSG00000037138.18	ENSMUST00000095027.8	AFF3	ENSG00000144218	ENSP00000386834	1	0.0578	0.558	100	86.4908	88.0391	ortholog_one2one	NM_001290814	Dazl.target
Afg3l2	ENSMUST00000025408	ENSMUSG00000024527	ENSMUSG00000024527.10	ENSMUST00000025408.9	AFG3L2	ENSG00000141385	ENSP00000269143	1	0.0378	0.7208	100	92.0954	91.5212	ortholog_one2one	NM_027130	Dazl.target
Aga	ENSMUST00000033920	ENSMUSG00000031521	ENSMUSG00000031521.5	ENSMUST00000033920.5	AGA	ENSG00000038002	ENSP00000264595	1	0.1042	0.4448	100	82.3699	82.3699	ortholog_one2one	NM_001005847	Dazl.target
Agfg1	ENSMUST00000189220	ENSMUSG00000026159	ENSMUSG00000026159.13	ENSMUST00000189220.6	AGFG1	ENSG00000173744	ENSP00000387282	1	0.0174	0.2617	100	92.637	96.78	ortholog_one2one	NM_010472	Dazl.target
Agpat5	ENSMUST00000149565	ENSMUSG00000031467	ENSMUSG00000031467.10	ENSMUST00000149565.7	AGPAT5	ENSG00000155189	ENSP00000285518	1	0.1094	0.3902	75	81.8681	81.6438	ortholog_one2one	NM_026792	Dazl.target
Agps	ENSMUST00000047232	ENSMUSG00000042410	ENSMUSG00000042410.16	ENSMUST00000047232.13	AGPS	ENSG00000018510	ENSP00000264167	1	0.0599	0.3847	100	89.5137	87.7794	ortholog_one2one	NM_172666	Dazl.target
Ahctf1	ENSMUST00000027768	ENSMUSG00000026491	ENSMUSG00000026491.13	ENSMUST00000027768.13	AHCTF1	ENSG00000153207	ENSP00000355465	1	0.18	0.5926	50	70.3297	71.333	ortholog_one2one	NM_026375	Dazl.target
Ahcyl1	ENSMUST00000029490	ENSMUSG00000027893	ENSMUSG00000027893.14	ENSMUST00000029490.14	AHCYL1	ENSG00000168710	ENSP00000358814	1	0	0	100	100	100	ortholog_one2one	NM_145542	Dazl.target
Ahdc1	ENSMUST00000105916	ENSMUSG00000037692	ENSMUSG00000037692.14	ENSMUST00000105916.7	AHDC1	ENSG00000126705	ENSP00000363123	1	0.0232	0.5522	100	94.6351	95.1694	ortholog_one2one	NM_146155	Dazl.target
Ahi1	ENSMUST00000105525	ENSMUSG00000019986	ENSMUSG00000019986.17	ENSMUST00000105525.11	AHI1	ENSG00000135541	ENSP00000265602	1	0.1229	0.7164	100	69.0635	78.8921	ortholog_one2one	NM_026203	Dazl.target
AI597479	ENSMUST00000010434	ENSMUSG00000010290	ENSMUSG00000010290.7	ENSMUST00000010434.7	C2orf49	ENSG00000135974	ENSP00000258457	1	0.0763	0.5035	100	84.9138	84.9138	ortholog_one2one	NM_133818	Dazl.target
Aig1	ENSMUST00000162610	ENSMUSG00000019806	ENSMUSG00000019806.13	ENSMUST00000162610.7	AIG1	ENSG00000146416	ENSP00000350509	1	0.0643	0.5511	100	91.5966	83.2061	ortholog_one2one	NM_001347362	Dazl.target
Ajuba	ENSMUST00000054487	ENSMUSG00000022178	ENSMUSG00000022178.11	ENSMUST00000054487.9	AJUBA	ENSG00000129474	ENSP00000262713	1	0.032	0.507	100	93.3085	91.7733	ortholog_one2one	NM_010590	Dazl.target
Ak2	ENSMUST00000102604	ENSMUSG00000028792	ENSMUSG00000028792.14	ENSMUST00000102604.10	AK2	ENSG00000004455	ENSP00000499935	1	0.0257	0.5822	100	94.5607	94.5607	ortholog_one2one	NM_016895	Dazl.target
Ak4	ENSMUST00000106946	ENSMUSG00000028527	ENSMUSG00000028527.18	ENSMUST00000106946.7	AK4	ENSG00000162433	ENSP00000378743	1	0.0492	0.4573	100	89.6861	89.6861	ortholog_one2one	NM_001177602	Dazl.target
Akap11	ENSMUST00000123853	ENSMUSG00000022016	ENSMUSG00000022016.16	ENSMUST00000123853.8	AKAP11	ENSG00000023516	ENSP00000025301	1	0.15	0.4915	100	74.0663	74.3008	ortholog_one2one	NM_001164503	Dazl.target
Akap13	ENSMUST00000166315	ENSMUSG00000066406	ENSMUSG00000066406.15	ENSMUST00000166315.6	AKAP13	ENSG00000170776	ENSP00000354718	1	0.1608	0.5013	50	72.7015	73.7752	ortholog_one2one	NM_029332	Dazl.target
Akap8	ENSMUST00000002699	ENSMUSG00000024045	ENSMUSG00000024045.6	ENSMUST00000002699.6	AKAP8	ENSG00000105127	ENSP00000269701	1	0.115	0.6687	100	79.3353	79.9127	ortholog_one2one	NM_019774	Dazl.target
Akirin1	ENSMUST00000102636	ENSMUSG00000023075	ENSMUSG00000023075.9	ENSMUST00000102636.3	AKIRIN1	ENSG00000174574	ENSP00000392678	1	0.0397	0.3373	100	92.1875	92.6702	ortholog_one2one	NM_023423	Dazl.target
Akirin2	ENSMUST00000084299	ENSMUSG00000028291	ENSMUSG00000028291.7	ENSMUST00000084299.5	AKIRIN2	ENSG00000135334	ENSP00000257787	1	0.0295	0.2843	100	92.6108	93.5323	ortholog_one2one	NM_001007589	Dazl.target
Akt3	ENSMUST00000111160	ENSMUSG00000019699	ENSMUSG00000019699.16	ENSMUST00000111160.8	AKT3	ENSG00000117020	ENSP00000500582	1	0.0019	0.2801	100	99.5825	99.5825	ortholog_one2one	NM_011785	Dazl.target
Aldh1a2	ENSMUST00000034723	ENSMUSG00000013584	ENSMUSG00000013584.5	ENSMUST00000034723.5	ALDH1A2	ENSG00000128918	ENSP00000249750	1	0.0139	0.4368	100	96.9112	96.9112	ortholog_one2one	NM_009022	Dazl.target
Aldh3a2	ENSMUST00000074127	ENSMUSG00000010025	ENSMUSG00000010025.19	ENSMUST00000074127.13	ALDH3A2	ENSG00000072210	ENSP00000345774	1	0.0869	0.6095	75	80.315	84.2975	ortholog_one2one	NM_007437	Dazl.target
Aldh7a1	ENSMUST00000174518	ENSMUSG00000053644	ENSMUSG00000053644.13	ENSMUST00000174518.7	ALDH7A1	ENSG00000164904	ENSP00000387123	1	0.0681	0.5174	100	88.3117	88.3117	ortholog_one2one	NM_001127338	Dazl.target
Alg2	ENSMUST00000044148	ENSMUSG00000039740	ENSMUSG00000039740.6	ENSMUST00000044148.2	ALG2	ENSG00000119523	ENSP00000417764	1	0.12	0.5651	100	80.5288	80.7229	ortholog_one2one	NM_019998	Dazl.target
Alkbh1	ENSMUST00000162961	ENSMUSG00000079036	ENSMUSG00000079036.10	ENSMUST00000162961.7	ALKBH1	ENSG00000100601	ENSP00000216489	1	0.0972	0.467	100	82.7764	82.7764	ortholog_one2one	NM_001102565	Dazl.target
Alkbh1	ENSMUST00000185301	ENSMUSG00000079036	ENSMUSG00000079036.10	ENSMUST00000185301.1	ALKBH1	ENSG00000100601	ENSP00000216489	1	0.0972	0.467	100	82.7764	82.7764	ortholog_one2one	NM_001013372	Dazl.target
Alkbh5	ENSMUST00000044250	ENSMUSG00000042650	ENSMUSG00000042650.3	ENSMUST00000044250.3	ALKBH5	ENSG00000091542	ENSP00000382091	1	0.0126	0.6009	100	97.2081	96.962	ortholog_one2one	NM_172943	Dazl.target
Als2	ENSMUST00000163058	ENSMUSG00000026024	ENSMUSG00000026024.14	ENSMUST00000163058.1	ALS2	ENSG00000003393	ENSP00000264276	1	0.0415	0.4975	100	91.9131	92.2471	ortholog_one2one	NM_001159948	Dazl.target
Amfr	ENSMUST00000053766	ENSMUSG00000031751	ENSMUSG00000031751.14	ENSMUST00000053766.13	AMFR	ENSG00000159461	ENSP00000290649	1	0.0277	0.4764	100	93.7792	94.3662	ortholog_one2one	NM_011787	Dazl.target
Ammecr1l	ENSMUST00000115808	ENSMUSG00000041915	ENSMUSG00000041915.9	ENSMUST00000115808.3	AMMECR1L	ENSG00000144233	ENSP00000272647	1	0.0078	0.2056	75	98.3871	98.3871	ortholog_one2one	NM_153515	Dazl.target
Amot	ENSMUST00000112836	ENSMUSG00000041688	ENSMUSG00000041688.16	ENSMUST00000112836.8	AMOT	ENSG00000126016	ENSP00000361027	1	0.0606	0.4068	100	86.2546	83.0373	ortholog_one2one	NM_153319	Dazl.target
Amotl2	ENSMUST00000035121	ENSMUSG00000032531	ENSMUSG00000032531.15	ENSMUST00000035121.13	AMOTL2	ENSG00000114019	ENSP00000424765	1	0.0539	0.7017	100	82.4373	89.3782	ortholog_one2one	NM_019764	Dazl.target
Ampd2	ENSMUST00000078912	ENSMUSG00000027889	ENSMUSG00000027889.17	ENSMUST00000078912.6	AMPD2	ENSG00000116337	ENSP00000499465	1	0.0135	0.6143	100	91.1263	97.2087	ortholog_one2one	NM_001346665	Dazl.target
Anapc1	ENSMUST00000014499	ENSMUSG00000014355	ENSMUSG00000014355.10	ENSMUST00000014499.9	ANAPC1	ENSG00000153107	ENSP00000339109	1	0.0396	0.4679	100	92.3868	92.3868	ortholog_one2one	NM_008569	Dazl.target
Anapc10	ENSMUST00000048147	ENSMUSG00000036977	ENSMUSG00000036977.8	ENSMUST00000048147.8	AC098588.2	ENSG00000285713	ENSP00000497507	1	0.0555	0.4779	75	92.437	59.4595	ortholog_one2one	NM_001357236	Dazl.target
Angel1	ENSMUST00000021682	ENSMUSG00000021257	ENSMUSG00000021257.14	ENSMUST00000021682.8	ANGEL1	ENSG00000013523	ENSP00000251089	1	0.0492	0.3255	100	89.7015	90.1049	ortholog_one2one	NM_144524	Dazl.target
Angel2	ENSMUST00000066632	ENSMUSG00000026634	ENSMUSG00000026634.16	ENSMUST00000066632.13	ANGEL2	ENSG00000174606	ENSP00000355929	1	0.0801	0.5205	100	85.4779	85.4779	ortholog_one2one	NM_021421	Dazl.target
Ank	ENSMUST00000022875	ENSMUSG00000022265	ENSMUSG00000022265.7	ENSMUST00000022875.6	ANKH	ENSG00000154122	ENSP00000284268	1	0.0075	0.6052	100	97.9675	97.9675	ortholog_one2one	NM_020332	Dazl.target
Ankfy1	ENSMUST00000155998	ENSMUSG00000020790	ENSMUSG00000020790.14	ENSMUST00000155998.1	ANKFY1	ENSG00000185722	ENSP00000459943	1	0.029	0.5263	100	91.4121	94.6963	ortholog_one2one	NM_009671	Dazl.target
Ankrd10	ENSMUST00000033905	ENSMUSG00000031508	ENSMUSG00000031508.14	ENSMUST00000033905.12	ANKRD10	ENSG00000088448	ENSP00000267339	1	0.1208	0.4603	100	77.381	78.3133	ortholog_one2one	NM_133971	Dazl.target
Ankrd12	ENSMUST00000038116	ENSMUSG00000034647	ENSMUSG00000034647.15	ENSMUST00000038116.12	ANKRD12	ENSG00000101745	ENSP00000262126	1	0.0953	0.6667	75	81.2318	82.0676	ortholog_one2one	NM_001025572	Dazl.target
Ankrd13c	ENSMUST00000040787	ENSMUSG00000039988	ENSMUSG00000039988.14	ENSMUST00000040787.12	ANKRD13C	ENSG00000118454	ENSP00000359982	1	0.0414	0.4199	100	91.3124	91.3124	ortholog_one2one	NM_001013806	Dazl.target
Ankrd17	ENSMUST00000014421	ENSMUSG00000055204	ENSMUSG00000055204.15	ENSMUST00000014421.14	ANKRD17	ENSG00000132466	ENSP00000351416	1	0.0154	0.2505	100	96.312	96.312	ortholog_one2one	NM_030886	Dazl.target
Ankrd29	ENSMUST00000118525	ENSMUSG00000057766	ENSMUSG00000057766.14	ENSMUST00000118525.8	ANKRD29	ENSG00000154065	ENSP00000468354	1	0.0218	0.4	100	96.0133	93.5275	ortholog_one2one	NM_001190371	Dazl.target
Ankrd46	ENSMUST00000057486	ENSMUSG00000048307	ENSMUSG00000048307.8	ENSMUST00000057486.8	ANKRD46	ENSG00000186106	ENSP00000429015	1	0.0591	0.7201	100	90.0862	91.6667	ortholog_one2one	NM_175134	Dazl.target
Anln	ENSMUST00000040912	ENSMUSG00000036777	ENSMUSG00000036777.8	ENSMUST00000040912.8	ANLN	ENSG00000011426	ENSP00000265748	1	0.1178	0.5395	25	79.5374	79.7502	ortholog_one2one	NM_028390	Dazl.target
Anp32e	ENSMUST00000165307	ENSMUSG00000015749	ENSMUSG00000015749.12	ENSMUST00000165307.7	ANP32E	ENSG00000143401	ENSP00000463154	1	0.0267	0.6895	100	90.6716	93.4615	ortholog_one2one	NM_023210	Dazl.target
Anxa7	ENSMUST00000065504	ENSMUSG00000021814	ENSMUSG00000021814.17	ENSMUST00000065504.16	ANXA7	ENSG00000138279	ENSP00000362010	1	0.0394	0.4984	100	87.9098	92.6566	ortholog_one2one	NM_001110794	Dazl.target
Ap1ar	ENSMUST00000051737	ENSMUSG00000074238	ENSMUSG00000074238.6	ENSMUST00000051737.7	AP1AR	ENSG00000138660	ENSP00000274000	1	0.0426	0.899	100	89.7351	90.9396	ortholog_one2one	NM_145964	Dazl.target
Ap1g1	ENSMUST00000093157	ENSMUSG00000031731	ENSMUSG00000031731.16	ENSMUST00000093157.12	AP1G1	ENSG00000166747	ENSP00000377148	1	0.0035	0.2562	100	99.2727	99.2727	ortholog_one2one	NM_009677	Dazl.target
Ap2a1	ENSMUST00000107857	ENSMUSG00000060279	ENSMUSG00000060279.14	ENSMUST00000107857.10	AP2A1	ENSG00000196961	ENSP00000351926	1	0.0062	0.7345	100	98.4647	98.4647	ortholog_one2one	NM_001077264	Dazl.target
Ap3s2	ENSMUST00000075657	ENSMUSG00000063801	ENSMUSG00000063801.7	ENSMUST00000075657.7	AP3S2	ENSG00000157823	ENSP00000338777	1	0	0	100	100	100	ortholog_one2one	NM_009682	Dazl.target
Apba2	ENSMUST00000032732	ENSMUSG00000030519	ENSMUSG00000030519.14	ENSMUST00000032732.14	APBA2	ENSG00000034053	ENSP00000453293	1	0.0405	0.8445	50	92.2563	92.1333	ortholog_one2one	NM_001291167	Dazl.target
Apbb1ip	ENSMUST00000014290	ENSMUSG00000026786	ENSMUSG00000026786.14	ENSMUST00000014290.14	APBB1IP	ENSG00000077420	ENSP00000365411	1	0.1244	0.5732	100	79.5796	79.1045	ortholog_one2one	NM_019456	Dazl.target
Apc	ENSMUST00000079362	ENSMUSG00000005871	ENSMUSG00000005871.15	ENSMUST00000079362.12	APC	ENSG00000134982	ENSP00000257430	1	0.0467	0.525	100	90.6437	90.6756	ortholog_one2one	NM_007462	Dazl.target
Apex1	ENSMUST00000049411	ENSMUSG00000035960	ENSMUSG00000035960.14	ENSMUST00000049411.11	APEX1	ENSG00000100823	ENSP00000216714	1	0.027	0.6427	100	94.3396	94.6372	ortholog_one2one	NM_009687	Dazl.target
Api5	ENSMUST00000028617	ENSMUSG00000027193	ENSMUSG00000027193.12	ENSMUST00000028617.6	API5	ENSG00000166181	ENSP00000431391	1	0.0147	0.4601	100	93.7023	97.4206	ortholog_one2one	NM_007466	Dazl.target
Aplp2	ENSMUST00000072634	ENSMUSG00000031996	ENSMUSG00000031996.17	ENSMUST00000072634.14	APLP2	ENSG00000084234	ENSP00000497691	1	0.0343	0.4087	100	91.3499	92.8096	ortholog_one2one	NM_001102455	Dazl.target
Appbp2	ENSMUST00000018625	ENSMUSG00000018481	ENSMUSG00000018481.9	ENSMUST00000018625.9	APPBP2	ENSG00000062725	ENSP00000083182	1	0.004	0.4021	100	99.1453	99.1453	ortholog_one2one	NM_025825	Dazl.target
Appl1	ENSMUST00000036570	ENSMUSG00000040760	ENSMUSG00000040760.11	ENSMUST00000036570.4	APPL1	ENSG00000157500	ENSP00000288266	1	0.0078	0.3564	100	98.0254	98.3027	ortholog_one2one	NM_145221	Dazl.target
Aqr	ENSMUST00000043160	ENSMUSG00000040383	ENSMUSG00000040383.16	ENSMUST00000043160.12	AQR	ENSG00000021776	ENSP00000156471	1	0.0295	0.6224	100	94.2088	94.4632	ortholog_one2one	NM_009702	Dazl.target
Araf	ENSMUST00000001155	ENSMUSG00000001127	ENSMUSG00000001127.12	ENSMUST00000001155.10	ARAF	ENSG00000078061	ENSP00000290277	1	0.0229	0.4645	100	94.0887	94.8675	ortholog_one2one	NM_009703	Dazl.target
Arcn1	ENSMUST00000034607	ENSMUSG00000032096	ENSMUSG00000032096.16	ENSMUST00000034607.9	ARCN1	ENSG00000095139	ENSP00000264028	1	0.0046	0.33	100	99.0215	99.0215	ortholog_one2one	NM_145985	Dazl.target
Arf1	ENSMUST00000163300	ENSMUSG00000048076	ENSMUSG00000048076.14	ENSMUST00000163300.7	ARF1	ENSG00000143761	ENSP00000440005	1	0	0	100	100	100	ortholog_one2one	NM_001130408	Dazl.target
Arf4	ENSMUST00000022429	ENSMUSG00000021877	ENSMUSG00000021877.12	ENSMUST00000022429.8	ARF4	ENSG00000168374	ENSP00000306010	1	0.0186	0.2821	100	96.1111	96.1111	ortholog_one2one	NM_007479	Dazl.target
Arf6	ENSMUST00000050063	ENSMUSG00000044147	ENSMUSG00000044147.8	ENSMUST00000050063.8	ARF6	ENSG00000165527	ENSP00000298316	1	0	0	100	100	100	ortholog_one2one	NM_007481	Dazl.target
Arfgap3	ENSMUST00000067215	ENSMUSG00000054277	ENSMUSG00000054277.8	ENSMUST00000067215.8	ARFGAP3	ENSG00000242247	ENSP00000263245	1	0.1018	0.8995	100	81.2016	79.9618	ortholog_one2one	NM_001357756	Dazl.target
Arfgef1	ENSMUST00000088615	ENSMUSG00000067851	ENSMUSG00000067851.11	ENSMUST00000088615.10	ARFGEF1	ENSG00000066777	ENSP00000262215	1	0.0125	0.3656	100	97.1877	97.3456	ortholog_one2one	NM_001102430	Dazl.target
Arglu1	ENSMUST00000048545	ENSMUSG00000040459	ENSMUSG00000040459.11	ENSMUST00000048545.9	ARGLU1	ENSG00000134884	ENSP00000383059	1	0.0081	0.3115	100	98.1685	98.893	ortholog_one2one	NM_176849	Dazl.target
Arhgap1	ENSMUST00000111330	ENSMUSG00000027247	ENSMUSG00000027247.16	ENSMUST00000111330.2	ARHGAP1	ENSG00000175220	ENSP00000310491	1	0.0176	0.6471	100	96.5831	88.5177	ortholog_one2one	NM_146124	Dazl.target
Arhgap17	ENSMUST00000106442	ENSMUSG00000030766	ENSMUSG00000030766.15	ENSMUST00000106442.8	ARHGAP17	ENSG00000140750	ENSP00000289968	1	0.0747	0.6685	100	84.109	87.5887	ortholog_one2one	NM_144529	Dazl.target
Arhgap29	ENSMUST00000037958	ENSMUSG00000039831	ENSMUSG00000039831.16	ENSMUST00000037958.13	ARHGAP29	ENSG00000137962	ENSP00000260526	1	0.0937	0.5053	100	82.8707	82.5434	ortholog_one2one	NM_172525	Dazl.target
Arhgap32	ENSMUST00000174641	ENSMUSG00000041444	ENSMUSG00000041444.14	ENSMUST00000174641.7	ARHGAP32	ENSG00000134909	ENSP00000310561	1	0.0662	0.4601	100	87.7815	87.6975	ortholog_one2one	NM_001195632	Dazl.target
Arhgap44	ENSMUST00000047463	ENSMUSG00000033389	ENSMUSG00000033389.16	ENSMUST00000047463.14	ARHGAP44	ENSG00000006740	ENSP00000368994	1	0.0337	0.539	100	87.2861	93.4555	ortholog_one2one	NM_175003	Dazl.target
Arhgap5	ENSMUST00000110725	ENSMUSG00000035133	ENSMUSG00000035133.9	ENSMUST00000110725.1	ARHGAP5	ENSG00000100852	ENSP00000371897	1	0.0122	0.3117	100	97.4035	97.3387	ortholog_one2one	NM_009706	Dazl.target
Arhgef1	ENSMUST00000117419	ENSMUSG00000040940	ENSMUSG00000040940.18	ENSMUST00000117419.7	ARHGEF1	ENSG00000076928	ENSP00000337261	1	0.0624	0.6286	100	86.6235	82.0225	ortholog_one2one	NM_001130152	Dazl.target
Arhgef11	ENSMUST00000039476	ENSMUSG00000041977	ENSMUSG00000041977.18	ENSMUST00000039476.14	ARHGEF11	ENSG00000132694	ENSP00000357177	1	0.0765	0.4342	100	84.6991	85.2448	ortholog_one2one	NM_001003912	Dazl.target
Arhgef2	ENSMUST00000029694	ENSMUSG00000028059	ENSMUSG00000028059.16	ENSMUST00000029694.13	ARHGEF2	ENSG00000116584	ENSP00000354837	1	0.06	0.6504	100	88.5396	88.6294	ortholog_one2one	NM_008487	Dazl.target
Arhgef3	ENSMUST00000225949	ENSMUSG00000021895	ENSMUSG00000021895.10	ENSMUST00000225949.1	ARHGEF3	ENSG00000163947	ENSP00000341071	1	0.039	0.5813	100	87.9928	92.467	ortholog_one2one	NM_001289686	Dazl.target
Arhgef7	ENSMUST00000074856	ENSMUSG00000031511	ENSMUSG00000031511.15	ENSMUST00000074856.12	ARHGEF7	ENSG00000102606	ENSP00000495631	1	0.0354	0.6743	100	84.6868	93.3504	ortholog_one2one	NM_017402	Dazl.target
Arid1a	ENSMUST00000105897	ENSMUSG00000007880	ENSMUSG00000007880.16	ENSMUST00000105897.9	ARID1A	ENSG00000117713	ENSP00000320485	1	0.0166	0.2337	100	96.3676	96.452	ortholog_one2one	NM_001080819	Dazl.target
Arid4b	ENSMUST00000110534	ENSMUSG00000039219	ENSMUSG00000039219.18	ENSMUST00000110534.7	ARID4B	ENSG00000054267	ENSP00000264183	1	0.0489	0.4457	50	89.4055	89.2694	ortholog_one2one	NM_194262	Dazl.target
Arih1	ENSMUST00000171975	ENSMUSG00000025234	ENSMUSG00000025234.11	ENSMUST00000171975.7	ARIH1	ENSG00000166233	ENSP00000369217	1	0.0023	0.2272	50	99.1023	99.4595	ortholog_one2one	NM_019927	Dazl.target
Arih2	ENSMUST00000013338	ENSMUSG00000064145	ENSMUSG00000064145.12	ENSMUST00000013338.13	ARIH2	ENSG00000177479	ENSP00000348769	1	0.0083	0.4407	100	97.5659	97.7642	ortholog_one2one	NM_001357285	Dazl.target
Arl14epl	ENSMUST00000234910	ENSMUSG00000073568	ENSMUSG00000073568.2	ENSMUST00000234910.1	ARL14EPL	ENSG00000268223	ENSP00000472409	1	NA	NA	100	88.1579	88.1579	ortholog_one2one	NM_001033446	Dazl.target
Arl2bp	ENSMUST00000034228	ENSMUSG00000031776	ENSMUSG00000031776.17	ENSMUST00000034228.15	ARL2BP	ENSG00000102931	ENSP00000219204	1	0.0245	0.5083	100	95.7055	95.7055	ortholog_one2one	NM_024191	Dazl.target
Arl5a	ENSMUST00000036541	ENSMUSG00000036093	ENSMUSG00000036093.7	ENSMUST00000036541.7	ARL5A	ENSG00000162980	ENSP00000295087	1	0.0051	0.495	100	98.8827	98.8827	ortholog_one2one	NM_182994	Dazl.target
Arl5b	ENSMUST00000239125	ENSMUSG00000017418	ENSMUSG00000017418.14	ENSMUST00000239125.1	ARL5B	ENSG00000165997	ENSP00000366487	1	0	0	100	100	99.4444	ortholog_one2one	NM_029466	Dazl.target
Arl6ip1	ENSMUST00000032888	ENSMUSG00000030654	ENSMUSG00000030654.9	ENSMUST00000032888.9	ARL6IP1	ENSG00000170540	ENSP00000306788	1	0.0172	0.3249	75	96.5517	96.5517	ortholog_one2one	NM_019419	Dazl.target
Arl6ip6	ENSMUST00000028336	ENSMUSG00000026960	ENSMUSG00000026960.6	ENSMUST00000028336.6	ARL6IP6	ENSG00000177917	ENSP00000315357	1	0.1062	0.4801	100	81.8584	81.8584	ortholog_one2one	NM_022989	Dazl.target
Arl8a	ENSMUST00000027684	ENSMUSG00000026426	ENSMUSG00000026426.10	ENSMUST00000027684.10	ARL8A	ENSG00000143862	ENSP00000272217	1	0.0023	0.5373	100	99.4624	99.4624	ortholog_one2one	NM_026823	Dazl.target
Armc8	ENSMUST00000185524	ENSMUSG00000032468	ENSMUSG00000032468.11	ENSMUST00000185524.6	ARMC8	ENSG00000114098	ENSP00000419413	1	0.0056	0.2874	100	98.8113	98.8113	ortholog_one2one	NM_001166138	Dazl.target
Armcx2	ENSMUST00000113193	ENSMUSG00000033436	ENSMUSG00000033436.13	ENSMUST00000113193.8	ARMCX2	ENSG00000184867	ENSP00000349281	1	0.1401	0.5306	75	78.0063	62.8827	ortholog_one2one	NM_001166397	Dazl.target
Arntl	ENSMUST00000047321	ENSMUSG00000055116	ENSMUSG00000055116.8	ENSMUST00000047321.8	ARNTL	ENSG00000133794	ENSP00000384517	1	0.0075	0.3904	100	98.4026	98.4026	ortholog_one2one	NM_007489	Dazl.target
Arpc2	ENSMUST00000006467	ENSMUSG00000006304	ENSMUSG00000006304.14	ENSMUST00000006467.13	ARPC2	ENSG00000163466	ENSP00000295685	1	0.003	0.2663	100	99.3333	99.3333	ortholog_one2one	NM_029711	Dazl.target
Arpc3	ENSMUST00000102525	ENSMUSG00000029465	ENSMUSG00000029465.14	ENSMUST00000102525.10	ARPC3	ENSG00000111229	ENSP00000228825	1	0.0101	0.9884	100	97.191	97.191	ortholog_one2one	NM_019824	Dazl.target
Arpc5	ENSMUST00000077755	ENSMUSG00000008475	ENSMUSG00000008475.13	ENSMUST00000077755.10	ARPC5	ENSG00000162704	ENSP00000294742	1	0.003	0.4206	75	96.7533	98.6755	ortholog_one2one	NM_026369	Dazl.target
Arpc5l	ENSMUST00000112862	ENSMUSG00000026755	ENSMUSG00000026755.14	ENSMUST00000112862.6	ARPC5L	ENSG00000136950	ENSP00000345361	1	0.0152	0.3442	100	96.732	96.732	ortholog_one2one	NM_028809	Dazl.target
Arrdc3	ENSMUST00000099356	ENSMUSG00000074794	ENSMUSG00000074794.10	ENSMUST00000099356.9	ARRDC3	ENSG00000113369	ENSP00000265138	1	0.0102	0.2993	100	98.0676	98.0676	ortholog_one2one	NM_001042591	Dazl.target
Arrdc4	ENSMUST00000048068	ENSMUSG00000042659	ENSMUSG00000042659.15	ENSMUST00000048068.14	ARRDC4	ENSG00000140450	ENSP00000268042	1	0.0756	0.6795	100	85.8852	86.506	ortholog_one2one	NM_001042592	Dazl.target
Asah1	ENSMUST00000034000	ENSMUSG00000031591	ENSMUSG00000031591.14	ENSMUST00000034000.14	ASAH1	ENSG00000104763	ENSP00000371152	1	0.1299	0.5214	50	73.4793	76.6497	ortholog_one2one	NM_019734	Dazl.target
Asb3	ENSMUST00000020551	ENSMUSG00000020305	ENSMUSG00000020305.13	ENSMUST00000020551.12	ASB3	ENSG00000115239	ENSP00000499751	1	0.0916	0.3833	0	78.0576	82.6667	ortholog_one2one	NM_023906	Dazl.target
Asb8	ENSMUST00000123626	ENSMUSG00000048175	ENSMUSG00000048175.13	ENSMUST00000123626.7	ASB8	ENSG00000177981	ENSP00000445622	1	0.0133	0.4294	100	97.2222	97.2222	ortholog_one2one	NM_030121	Dazl.target
Ascc3	ENSMUST00000035606	ENSMUSG00000038774	ENSMUSG00000038774.9	ENSMUST00000035606.9	ASCC3	ENSG00000112249	ENSP00000358159	1	0.0392	0.472	75	92.0527	92.2202	ortholog_one2one	NM_198007	Dazl.target
Asf1a	ENSMUST00000020004	ENSMUSG00000019857	ENSMUSG00000019857.7	ENSMUST00000020004.7	ASF1A	ENSG00000111875	ENSP00000229595	1	0.0022	0.253	100	99.5098	99.5098	ortholog_one2one	NM_025541	Dazl.target
Asz1	ENSMUST00000010940	ENSMUSG00000010796	ENSMUSG00000010796.11	ENSMUST00000010940.10	ASZ1	ENSG00000154438	ENSP00000284629	1	0.0772	0.517	100	85.2632	85.2632	ortholog_one2one	NM_023729	Dazl.target
Atad1	ENSMUST00000235412	ENSMUSG00000013662	ENSMUSG00000013662.6	ENSMUST00000235412.1	ATAD1	ENSG00000138138	ENSP00000339017	1	0	0	100	100	100	ortholog_one2one	NM_026487	Dazl.target
Atf1	ENSMUST00000023769	ENSMUSG00000023027	ENSMUSG00000023027.13	ENSMUST00000023769.10	ATF1	ENSG00000123268	ENSP00000262053	1	0.0418	0.5503	100	91.1439	91.8216	ortholog_one2one	NM_007497	Dazl.target
Atf2	ENSMUST00000055833	ENSMUSG00000027104	ENSMUSG00000027104.18	ENSMUST00000055833.11	ATF2	ENSG00000115966	ENSP00000264110	1	0.0039	0.232	100	95.6436	99.1786	ortholog_one2one	NM_001025093	Dazl.target
Atf7ip2	ENSMUST00000044005	ENSMUSG00000039200	ENSMUSG00000039200.16	ENSMUST00000044005.13	ATF7IP2	ENSG00000166669	ENSP00000379808	0	0.2214	0.4512	100	43.695	65.9292	ortholog_one2one	NM_153123	Dazl.target
Atg101	ENSMUST00000048393	ENSMUSG00000037204	ENSMUSG00000037204.7	ENSMUST00000048393.7	ATG101	ENSG00000123395	ENSP00000338990	1	0.0057	0.7658	100	98.6239	98.6239	ortholog_one2one	NM_026566	Dazl.target
Atg14	ENSMUST00000042988	ENSMUSG00000037526	ENSMUSG00000037526.7	ENSMUST00000042988.6	ATG14	ENSG00000126775	ENSP00000247178	1	0.0322	0.6222	100	92.6829	92.6829	ortholog_one2one	NM_172599	Dazl.target
Atg5	ENSMUST00000039286	ENSMUSG00000038160	ENSMUSG00000038160.7	ENSMUST00000039286.4	ATG5	ENSG00000057663	ENSP00000358072	1	0.0152	0.35	100	96.3636	96.3636	ortholog_one2one	NM_053069	Dazl.target
Atic	ENSMUST00000027384	ENSMUSG00000026192	ENSMUSG00000026192.13	ENSMUST00000027384.5	ATIC	ENSG00000138363	ENSP00000236959	1	0.0476	0.6118	100	91.0473	91.0473	ortholog_one2one	NM_026195	Dazl.target
Atl1	ENSMUST00000021466	ENSMUSG00000021066	ENSMUSG00000021066.9	ENSMUST00000021466.9	ATL1	ENSG00000198513	ENSP00000351155	1	0.0166	0.4124	100	96.4158	96.4158	ortholog_one2one	NM_178628	Dazl.target
Atm	ENSMUST00000232179	ENSMUSG00000034218	ENSMUSG00000034218.16	ENSMUST00000232179.1	ATM	ENSG00000149311	ENSP00000278616	1	0.088	0.4929	100	84.195	83.9204	ortholog_one2one	NM_007499	Dazl.target
Atp11b	ENSMUST00000029257	ENSMUSG00000037400	ENSMUSG00000037400.17	ENSMUST00000029257.14	ATP11B	ENSG00000058063	ENSP00000321195	1	0.0311	0.3682	100	93.288	93.4468	ortholog_one2one	NM_029570	Dazl.target
Atp11c	ENSMUST00000101527	ENSMUSG00000062949	ENSMUSG00000062949.13	ENSMUST00000101527.2	ATP11C	ENSG00000101974	ENSP00000332756	1	0.0308	0.3716	100	93.7279	93.977	ortholog_one2one	NM_001037863	Dazl.target
Atp2a2	ENSMUST00000031423	ENSMUSG00000029467	ENSMUSG00000029467.15	ENSMUST00000031423.9	ATP2A2	ENSG00000174437	ENSP00000440045	1	0.0055	0.452	75	98.8484	98.659	ortholog_one2one	NM_001110140	Dazl.target
Atp2b1	ENSMUST00000020107	ENSMUSG00000019943	ENSMUSG00000019943.10	ENSMUST00000020107.7	ATP2B1	ENSG00000070961	ENSP00000392043	1	0.0023	0.4709	75	99.5082	99.5082	ortholog_one2one	NM_026482	Dazl.target
Atp2b4	ENSMUST00000165602	ENSMUSG00000026463	ENSMUSG00000026463.17	ENSMUST00000165602.8	ATP2B4	ENSG00000058668	ENSP00000350310	1	0.0892	0.55	100	84.6473	84.6473	ortholog_one2one	NM_213616	Dazl.target
Atp5b	ENSMUST00000026459	ENSMUSG00000025393	ENSMUSG00000025393.12	ENSMUST00000026459.5	ATP5F1B	ENSG00000110955	ENSP00000262030	1	0.0195	0.4505	100	96.2193	96.2193	ortholog_one2one	NM_016774	Dazl.target
Atp5g3	ENSMUST00000111996	ENSMUSG00000018770	ENSMUSG00000018770.9	ENSMUST00000111996.7	ATP5MC3	ENSG00000154518	ENSP00000284727	1	0.0212	0.093	100	95.0704	95.7447	ortholog_one2one	NM_001301721	Dazl.target
Atp6ap1	ENSMUST00000019231	ENSMUSG00000019087	ENSMUSG00000019087.13	ENSMUST00000019231.11	ATP6AP1	ENSG00000071553	ENSP00000358777	1	0.0777	0.6008	100	85.1064	86.3931	ortholog_one2one	NM_018794	Dazl.target
Atp6ap2	ENSMUST00000033313	ENSMUSG00000031007	ENSMUSG00000031007.2	ENSMUST00000033313.2	ATP6AP2	ENSG00000182220	ENSP00000490083	1	0.0313	0.3921	75	93.7143	93.7143	ortholog_one2one	NM_027439	Dazl.target
Atp6v1a	ENSMUST00000114666	ENSMUSG00000052459	ENSMUSG00000052459.13	ENSMUST00000114666.8	ATP6V1A	ENSG00000114573	ENSP00000273398	1	0.0099	0.5239	100	98.0551	98.0551	ortholog_one2one	NM_007508	Dazl.target
Atp6v1b2	ENSMUST00000006435	ENSMUSG00000006273	ENSMUSG00000006273.14	ENSMUST00000006435.7	ATP6V1B2	ENSG00000147416	ENSP00000276390	1	0.0057	0.5038	75	97.8474	97.8474	ortholog_one2one	NM_007509	Dazl.target
Atp6v1f	ENSMUST00000004396	ENSMUSG00000004285	ENSMUSG00000004285.12	ENSMUST00000004396.12	ATP6V1F	ENSG00000128524	ENSP00000417378	1	0.0073	0.5581	75	78.9116	97.479	ortholog_one2one	NM_025381	Dazl.target
Atp6v1g1	ENSMUST00000035301	ENSMUSG00000039105	ENSMUSG00000039105.6	ENSMUST00000035301.6	ATP6V1G1	ENSG00000136888	ENSP00000363162	1	0.0275	0.4272	100	88.1356	88.1356	ortholog_one2one	NM_024173	Dazl.target
Atp6v1h	ENSMUST00000044369	ENSMUSG00000033793	ENSMUSG00000033793.12	ENSMUST00000044369.12	ATP6V1H	ENSG00000047249	ENSP00000352522	1	0.0065	0.4974	100	98.3437	98.3437	ortholog_one2one	NM_133826	Dazl.target
Atp7a	ENSMUST00000055941	ENSMUSG00000033792	ENSMUSG00000033792.12	ENSMUST00000055941.6	ATP7A	ENSG00000165240	ENSP00000345728	1	0.054	0.4114	100	89	89.4772	ortholog_one2one	NM_001109757	Dazl.target
Atrx	ENSMUST00000113573	ENSMUSG00000031229	ENSMUSG00000031229.16	ENSMUST00000113573.7	ATRX	ENSG00000085224	ENSP00000362441	1	0.0803	0.4799	100	83.6677	84.2084	ortholog_one2one	NM_009530	Dazl.target
Atxn2l	ENSMUST00000040202	ENSMUSG00000032637	ENSMUSG00000032637.15	ENSMUST00000040202.14	ATXN2L	ENSG00000168488	ENSP00000378917	1	0.0381	0.4004	75	88.7876	92.8503	ortholog_one2one	NM_183020	Dazl.target
Atxn7l3b	ENSMUST00000099276	ENSMUSG00000074748	ENSMUSG00000074748.3	ENSMUST00000099276.3	ATXN7L3B	ENSG00000253719	ENSP00000430000	1	0.038	0.4613	100	93.8144	93.8144	ortholog_one2one	NM_001033474	Dazl.target
Avl9	ENSMUST00000031805	ENSMUSG00000029787	ENSMUSG00000029787.10	ENSMUST00000031805.10	AVL9	ENSG00000105778	ENSP00000315568	1	0.0448	0.3501	100	91.5123	91.3713	ortholog_one2one	NM_030235	Dazl.target
Axin2	ENSMUST00000052915	ENSMUSG00000000142	ENSMUSG00000000142.15	ENSMUST00000052915.13	AXIN2	ENSG00000168646	ENSP00000302625	1	0.0491	0.6406	100	89.6797	90	ortholog_one2one	NM_015732	Dazl.target
Azin1	ENSMUST00000065308	ENSMUSG00000037458	ENSMUSG00000037458.15	ENSMUST00000065308.12	AZIN1	ENSG00000155096	ENSP00000337180	1	0.0197	0.2479	100	95.7589	95.7589	ortholog_one2one	NM_018745	Dazl.target
B2m	ENSMUST00000102476	ENSMUSG00000060802	ENSMUSG00000060802.8	ENSMUST00000102476.4	B2M	ENSG00000166710	ENSP00000497910	0	0.7223	64.957	100	37.8151	37.8151	ortholog_one2one	NM_009735	Dazl.target
B3gat2	ENSMUST00000063663	ENSMUSG00000026156	ENSMUSG00000026156.8	ENSMUST00000063663.5	B3GAT2	ENSG00000112309	ENSP00000230053	1	0.0472	0.4731	100	89.7833	89.5062	ortholog_one2one	NM_172124	Dazl.target
B3gnt5	ENSMUST00000121344	ENSMUSG00000022686	ENSMUSG00000022686.14	ENSMUST00000121344.7	B3GNT5	ENSG00000176597	ENSP00000316173	1	0.1193	0.4865	50	79.1005	79.5213	ortholog_one2one	NM_001159408	Dazl.target
B4galt1	ENSMUST00000030121	ENSMUSG00000028413	ENSMUSG00000028413.13	ENSMUST00000030121.12	B4GALT1	ENSG00000086062	ENSP00000369055	1	0.0739	0.4416	100	86.6834	86.4662	ortholog_one2one	NM_022305	Dazl.target
B4galt5	ENSMUST00000109221	ENSMUSG00000017929	ENSMUSG00000017929.13	ENSMUST00000109221.8	B4GALT5	ENSG00000158470	ENSP00000360776	1	0.0231	0.6349	100	94.8454	94.8454	ortholog_one2one	NM_019835	Dazl.target
Bag4	ENSMUST00000038498	ENSMUSG00000037316	ENSMUSG00000037316.9	ENSMUST00000038498.9	BAG4	ENSG00000156735	ENSP00000287322	1	0.0831	0.4919	100	84.9015	84.9015	ortholog_one2one	NM_026121	Dazl.target
Bahd1	ENSMUST00000036578	ENSMUSG00000040007	ENSMUSG00000040007.8	ENSMUST00000036578.6	BAHD1	ENSG00000140320	ENSP00000396976	1	0.0488	0.4759	100	90.641	91.5803	ortholog_one2one	NM_001045523	Dazl.target
Banf1	ENSMUST00000025762	ENSMUSG00000024844	ENSMUSG00000024844.15	ENSMUST00000025762.15	BANF1	ENSG00000175334	ENSP00000433760	1	0.0161	0.2667	100	96.6292	96.6292	ortholog_one2one	NM_011793	Dazl.target
Baz1b	ENSMUST00000002825	ENSMUSG00000002748	ENSMUSG00000002748.7	ENSMUST00000002825.5	BAZ1B	ENSG00000009954	ENSP00000342434	1	0.0427	0.5675	100	91.3014	91.5483	ortholog_one2one	NM_011714	Dazl.target
Baz2a	ENSMUST00000045621	ENSMUSG00000040054	ENSMUSG00000040054.17	ENSMUST00000045621.8	BAZ2A	ENSG00000076108	ENSP00000446880	1	0.0865	0.4006	100	83.6745	84.4727	ortholog_one2one	NM_054078	Dazl.target
Baz2b	ENSMUST00000112550	ENSMUSG00000026987	ENSMUSG00000026987.16	ENSMUST00000112550.7	BAZ2B	ENSG00000123636	ENSP00000376534	1	0.0584	0.5302	100	84.3635	86.1517	ortholog_one2one	NM_001001182	Dazl.target
BC005537	ENSMUST00000019276	ENSMUSG00000019132	ENSMUSG00000019132.11	ENSMUST00000019276.11	C6orf62	ENSG00000112308	ENSP00000367359	1	0	0	100	100	100	ortholog_one2one	NM_024473	Dazl.target
BC048403	ENSMUST00000065600	ENSMUSG00000053684	ENSMUSG00000053684.8	ENSMUST00000065600.7	C12orf66	ENSG00000174206	ENSP00000311486	1	0.0258	0.5423	100	89.9573	94.6067	ortholog_one2one	NM_173022	Dazl.target
Bcap29	ENSMUST00000020979	ENSMUSG00000020650	ENSMUSG00000020650.15	ENSMUST00000020979.8	BCAP29	ENSG00000075790	ENSP00000368414	1	0.119	0.666	100	55.7471	80.8333	ortholog_one2one	NM_007530	Dazl.target
Bcap31	ENSMUST00000002091	ENSMUSG00000002015	ENSMUSG00000002015.5	ENSMUST00000002091.5	BCAP31	ENSG00000185825	ENSP00000392330	1	0.0515	0.3874	100	71.246	91.0204	ortholog_one2one	NM_012060	Dazl.target
Bcas2	ENSMUST00000005830	ENSMUSG00000005687	ENSMUSG00000005687.14	ENSMUST00000005830.14	BCAS2	ENSG00000116752	ENSP00000358554	1	0	0	100	100	100	ortholog_one2one	NM_026602	Dazl.target
Bcl10	ENSMUST00000029842	ENSMUSG00000028191	ENSMUSG00000028191.11	ENSMUST00000029842.8	BCL10	ENSG00000142867	ENSP00000498104	1	0.0442	0.7906	100	90.9871	90.9871	ortholog_one2one	NM_009740	Dazl.target
Bcl6b	ENSMUST00000000326	ENSMUSG00000000317	ENSMUSG00000000317.11	ENSMUST00000000326.11	BCL6B	ENSG00000161940	ENSP00000293805	1	0.0458	0.5036	100	89.5616	90.5063	ortholog_one2one	NM_007528	Dazl.target
Bcl7a	ENSMUST00000031391	ENSMUSG00000029438	ENSMUSG00000029438.9	ENSMUST00000031391.8	BCL7A	ENSG00000110987	ENSP00000445868	1	0.0257	0.5424	100	85.7143	94.2857	ortholog_one2one	NM_029850	Dazl.target
Bclaf1	ENSMUST00000043881	ENSMUSG00000037608	ENSMUSG00000037608.16	ENSMUST00000043881.11	BCLAF1	ENSG00000029363	ENSP00000435210	1	0.0167	0.3596	100	96.1957	96.3003	ortholog_one2one	NM_001025392	Dazl.target
Bcor	ENSMUST00000043441	ENSMUSG00000040363	ENSMUSG00000040363.15	ENSMUST00000043441.12	BCOR	ENSG00000183337	ENSP00000367705	1	0.056	0.3958	50	89.0028	88.8005	ortholog_one2one	NM_001168321	Dazl.target
Bcorl1	ENSMUST00000136348	ENSMUSG00000036959	ENSMUSG00000036959.15	ENSMUST00000136348.7	BCORL1	ENSG00000085185	ENSP00000437775	1	0.0471	0.3802	75	90.6487	87.0859	ortholog_one2one	NM_178782	Dazl.target
Bcr	ENSMUST00000164107	ENSMUSG00000009681	ENSMUSG00000009681.10	ENSMUST00000164107.2	BCR	ENSG00000186716	ENSP00000303507	1	0.026	0.7067	50	93.9418	94.0157	ortholog_one2one	NM_001081412	Dazl.target
Bdp1	ENSMUST00000038104	ENSMUSG00000049658	ENSMUSG00000049658.13	ENSMUST00000038104.11	BDP1	ENSG00000145734	ENSP00000351575	1	0.3193	0.5865	75	52.5534	55.8979	ortholog_one2one	NM_001081061	Dazl.target
Becn1	ENSMUST00000130916	ENSMUSG00000035086	ENSMUSG00000035086.13	ENSMUST00000130916.7	BECN1	ENSG00000126581	ENSP00000355231	1	0.007	0.4193	100	97.7778	98.2143	ortholog_one2one	NM_019584	Dazl.target
Bend4	ENSMUST00000169190	ENSMUSG00000092060	ENSMUSG00000092060.4	ENSMUST00000169190.4	BEND4	ENSG00000188848	ENSP00000421169	1	0.0477	0.4957	100	89.7004	88.5397	ortholog_one2one	NM_001164806	Dazl.target
Bhlhe41	ENSMUST00000032386	ENSMUSG00000030256	ENSMUSG00000030256.11	ENSMUST00000032386.10	BHLHE41	ENSG00000123095	ENSP00000242728	1	0.1014	0.6359	100	67.8423	79.7561	ortholog_one2one	NM_024469	Dazl.target
Bicc1	ENSMUST00000143791	ENSMUSG00000014329	ENSMUSG00000014329.14	ENSMUST00000143791.7	BICC1	ENSG00000122870	ENSP00000362993	1	0.0365	0.6119	100	92.8131	92.5281	ortholog_one2one	NM_031397	Dazl.target
Bicd2	ENSMUST00000048544	ENSMUSG00000037933	ENSMUSG00000037933.16	ENSMUST00000048544.13	BICD2	ENSG00000185963	ENSP00000349351	1	0.0192	0.8917	100	94.9708	95.4172	ortholog_one2one	NM_001039179	Dazl.target
Birc6	ENSMUST00000180037	ENSMUSG00000024073	ENSMUSG00000024073.16	ENSMUST00000180037.7	BIRC6	ENSG00000115760	ENSP00000393596	1	0.0217	0.4676	100	95.594	95.2801	ortholog_one2one	NM_007566	Dazl.target
Blcap	ENSMUST00000088494	ENSMUSG00000067787	ENSMUSG00000067787.10	ENSMUST00000088494.2	BLCAP	ENSG00000166619	ENSP00000397172	1	0	0	100	100	100	ortholog_one2one	NM_016916	Dazl.target
Blm	ENSMUST00000170315	ENSMUSG00000030528	ENSMUSG00000030528.12	ENSMUST00000170315.2	BLM	ENSG00000197299	ENSP00000347232	1	0.1311	0.4956	100	76.4996	76.3918	ortholog_one2one	NM_007550	Dazl.target
Bloc1s6	ENSMUST00000005954	ENSMUSG00000005804	ENSMUSG00000005804.14	ENSMUST00000005954.8	BLOC1S6	ENSG00000104164	ENSP00000456851	1	0.1785	1.6889	100	75.7062	77.907	ortholog_one2one	NM_019788	Dazl.target
Bmp6	ENSMUST00000171970	ENSMUSG00000039004	ENSMUSG00000039004.6	ENSMUST00000171970.2	BMP6	ENSG00000153162	ENSP00000283147	1	0.0428	0.5863	100	89.4737	90	ortholog_one2one	NM_007556	Dazl.target
Bmpr1a	ENSMUST00000049005	ENSMUSG00000021796	ENSMUSG00000021796.15	ENSMUST00000049005.14	BMPR1A	ENSG00000107779	ENSP00000361107	1	0.0097	0.4169	100	97.9323	97.9323	ortholog_one2one	NM_009758	Dazl.target
Bnc1	ENSMUST00000026096	ENSMUSG00000025105	ENSMUSG00000025105.10	ENSMUST00000026096.9	BNC1	ENSG00000169594	ENSP00000307041	1	0.0687	0.452	100	86.5191	86.8687	ortholog_one2one	NM_007562	Dazl.target
Bnc2	ENSMUST00000176691	ENSMUSG00000028487	ENSMUSG00000028487.18	ENSMUST00000176691.7	BNC2	ENSG00000173068	ENSP00000370047	1	0.0135	0.3957	100	91.1738	97.093	ortholog_one2one	NM_172870	Dazl.target
Bnip3	ENSMUST00000106112	ENSMUSG00000078566	ENSMUSG00000078566.8	ENSMUST00000106112.1	BNIP3	ENSG00000176171	ENSP00000357625	1	0.0268	0.4106	100	67.9537	94.1176	ortholog_one2one	NM_009760	Dazl.target
Bnip3l	ENSMUST00000022634	ENSMUSG00000022051	ENSMUSG00000022051.15	ENSMUST00000022634.8	BNIP3L	ENSG00000104765	ENSP00000370003	1	0.0171	0.4091	100	96.8036	97.2477	ortholog_one2one	NM_009761	Dazl.target
Braf	ENSMUST00000002487	ENSMUSG00000002413	ENSMUSG00000002413.15	ENSMUST00000002487.14	BRAF	ENSG00000157764	ENSP00000419060	1	0.0135	0.2879	100	88.0052	83.9552	ortholog_one2one	NM_139294	Dazl.target
Brat1	ENSMUST00000100505	ENSMUSG00000000148	ENSMUSG00000000148.17	ENSMUST00000100505.2	BRAT1	ENSG00000106009	ENSP00000339637	1	0.1733	0.8618	25	73.3252	69.4348	ortholog_one2one	NM_001276287	Dazl.target
Brd1	ENSMUST00000109381	ENSMUSG00000022387	ENSMUSG00000022387.17	ENSMUST00000109381.8	BRD1	ENSG00000100425	ENSP00000410042	1	0.023	0.4997	100	95.1219	95.1219	ortholog_one2one	NM_001033274	Dazl.target
Brd2	ENSMUST00000114242	ENSMUSG00000024335	ENSMUSG00000024335.20	ENSMUST00000114242.8	BRD2	ENSG00000204256	ENSP00000378702	1	0.0207	0.4545	100	91.9856	96.3659	ortholog_one2one	NM_010238	Dazl.target
Brd3	ENSMUST00000028282	ENSMUSG00000026918	ENSMUSG00000026918.16	ENSMUST00000028282.14	BRD3	ENSG00000169925	ENSP00000305918	1	0.0204	0.6675	100	95.4545	93.2705	ortholog_one2one	NM_023336	Dazl.target
Brd4	ENSMUST00000120276	ENSMUSG00000024002	ENSMUSG00000024002.18	ENSMUST00000120276.8	BRD4	ENSG00000141867	ENSP00000263377	1	0.0218	0.4976	100	95.6681	93.005	ortholog_one2one	NM_198094	Dazl.target
Brd7	ENSMUST00000034085	ENSMUSG00000031660	ENSMUSG00000031660.13	ENSMUST00000034085.7	BRD7	ENSG00000166164	ENSP00000378181	1	0.064	0.4379	100	88.0368	88.172	ortholog_one2one	NM_012047	Dazl.target
Brdt	ENSMUST00000031215	ENSMUSG00000029279	ENSMUSG00000029279.15	ENSMUST00000031215.14	BRDT	ENSG00000137948	ENSP00000387822	1	0.1696	0.9662	100	71.8191	71.4435	ortholog_one2one	NM_054054	Dazl.target
Brk1	ENSMUST00000035725	ENSMUSG00000033940	ENSMUSG00000033940.8	ENSMUST00000035725.6	BRK1	ENSG00000254999	ENSP00000432472	1	0.0055	0.3233	100	98.6667	98.6667	ortholog_one2one	NM_133937	Dazl.target
Brsk2	ENSMUST00000078200	ENSMUSG00000053046	ENSMUSG00000053046.16	ENSMUST00000078200.11	BRSK2	ENSG00000174672	ENSP00000371614	1	0.0288	0.9253	100	89.0339	94.854	ortholog_one2one	NM_001009929	Dazl.target
Brwd1	ENSMUST00000099502	ENSMUSG00000022914	ENSMUSG00000022914.17	ENSMUST00000099502.8	BRWD1	ENSG00000185658	ENSP00000330753	1	0.1124	0.6906	100	79.6983	80.2517	ortholog_one2one	NM_001103179	Dazl.target
Btaf1	ENSMUST00000099494	ENSMUSG00000040565	ENSMUSG00000040565.8	ENSMUST00000099494.3	BTAF1	ENSG00000095564	ENSP00000265990	1	0.0176	0.3768	100	96.2682	96.3203	ortholog_one2one	NM_001080706	Dazl.target
Btbd10	ENSMUST00000047091	ENSMUSG00000038187	ENSMUSG00000038187.14	ENSMUST00000047091.13	BTBD10	ENSG00000148925	ENSP00000431186	1	0.0433	0.4327	100	90.2691	91.7895	ortholog_one2one	NM_133700	Dazl.target
Btbd3	ENSMUST00000075410	ENSMUSG00000062098	ENSMUSG00000062098.11	ENSMUST00000075410.4	BTBD3	ENSG00000132640	ENSP00000384545	1	0.0142	0.4375	100	97.5096	96.0377	ortholog_one2one	NM_145534	Dazl.target
Btbd7	ENSMUST00000223554	ENSMUSG00000041702	ENSMUSG00000041702.7	ENSMUST00000223554.1	BTBD7	ENSG00000011114	ENSP00000335615	1	0.0312	0.3249	100	93.5512	93.7168	ortholog_one2one	NM_172806	Dazl.target
Bub3	ENSMUST00000084502	ENSMUSG00000066979	ENSMUSG00000066979.6	ENSMUST00000084502.6	BUB3	ENSG00000154473	ENSP00000357858	1	0.0014	0.5538	100	99.0854	99.6933	ortholog_one2one	NM_009774	Dazl.target
Bzw1	ENSMUST00000050552	ENSMUSG00000051223	ENSMUSG00000051223.14	ENSMUST00000050552.14	BZW1	ENSG00000082153	ENSP00000394316	1	0	0	100	92.9047	100	ortholog_one2one	NM_025824	Dazl.target
C1d	ENSMUST00000000594	ENSMUSG00000000581	ENSMUSG00000000581.8	ENSMUST00000000594.8	C1D	ENSG00000197223	ENSP00000348107	1	0.0498	0.6535	100	90.0709	90.0709	ortholog_one2one	NM_001330649	Dazl.target
Cab39	ENSMUST00000113360	ENSMUSG00000036707	ENSMUSG00000036707.16	ENSMUST00000113360.7	CAB39	ENSG00000135932	ENSP00000258418	1	0.0042	0.3292	100	99.1202	99.1202	ortholog_one2one	NM_133781	Dazl.target
Cab39l	ENSMUST00000022553	ENSMUSG00000021981	ENSMUSG00000021981.10	ENSMUST00000022553.5	CAB39L	ENSG00000102547	ENSP00000479669	1	0.0067	0.4937	75	98.5163	98.5163	ortholog_one2one	NM_026908	Dazl.target
Cables2	ENSMUST00000108891	ENSMUSG00000038990	ENSMUSG00000038990.14	ENSMUST00000108891.1	CABLES2	ENSG00000149679	ENSP00000279101	1	0.0452	0.8085	100	89.9582	90.3361	ortholog_one2one	NM_145851	Dazl.target
Cacfd1	ENSMUST00000114006	ENSMUSG00000015488	ENSMUSG00000015488.14	ENSMUST00000114006.7	CACFD1	ENSG00000160325	ENSP00000440832	1	0.1577	1.2584	100	56.6524	77.193	ortholog_one2one	NM_029862	Dazl.target
Cacul1	ENSMUST00000081790	ENSMUSG00000033417	ENSMUSG00000033417.16	ENSMUST00000081790.14	CACUL1	ENSG00000151893	ENSP00000358147	1	0.0323	0.3781	100	92.9539	90.9814	ortholog_one2one	NM_030197	Dazl.target
Cacybp	ENSMUST00000014370	ENSMUSG00000014226	ENSMUSG00000014226.10	ENSMUST00000014370.10	CACYBP	ENSG00000116161	ENSP00000356652	1	0.0305	0.4899	75	93.4211	93.0131	ortholog_one2one	NM_009786	Dazl.target
Cad	ENSMUST00000013773	ENSMUSG00000013629	ENSMUSG00000013629.16	ENSMUST00000013773.11	CAD	ENSG00000084774	ENSP00000264705	1	0.0236	0.4949	100	95.3708	95.3708	ortholog_one2one	NM_023525	Dazl.target
Cadm1	ENSMUST00000085909	ENSMUSG00000032076	ENSMUSG00000032076.19	ENSMUST00000085909.8	CADM1	ENSG00000182985	ENSP00000329797	1	0.007	0.2864	75	98.5138	97.8903	ortholog_one2one	NM_207675	Dazl.target
Calm1	ENSMUST00000110082	ENSMUSG00000001175	ENSMUSG00000001175.15	ENSMUST00000110082.10	CALM1	ENSG00000198668	ENSP00000499717	1	0.0124	0.4268	100	98.6667	75.1269	ortholog_one2one	NM_009790	Dazl.target
Calm2	ENSMUST00000040440	ENSMUSG00000036438	ENSMUSG00000036438.14	ENSMUST00000040440.6	CALM2	ENSG00000143933	ENSP00000499797	1	0	0	100	100	100	ortholog_one2one	NM_007589	Dazl.target
Calm3	ENSMUST00000019514	ENSMUSG00000019370	ENSMUSG00000019370.10	ENSMUST00000019514.9	CALM3	ENSG00000160014	ENSP00000291295	1	0	0	100	100	100	ortholog_one2one	NM_007590	Dazl.target
Calr	ENSMUST00000003912	ENSMUSG00000003814	ENSMUSG00000003814.8	ENSMUST00000003912.6	CALR	ENSG00000179218	ENSP00000320866	1	0.0285	0.8944	100	94.2446	94.4712	ortholog_one2one	NM_007591	Dazl.target
Calu	ENSMUST00000031779	ENSMUSG00000029767	ENSMUSG00000029767.16	ENSMUST00000031779.16	CALU	ENSG00000128595	ENSP00000438248	1	0.0517	0.6394	100	89.1641	91.4286	ortholog_one2one	NM_007594	Dazl.target
Camk2g	ENSMUST00000080440	ENSMUSG00000021820	ENSMUSG00000021820.18	ENSMUST00000080440.13	CAMK2G	ENSG00000148660	ENSP00000319060	1	9e-04	0.2708	75	92.9856	97.7316	ortholog_one2one	NM_001039138	Dazl.target
Camkk2	ENSMUST00000200109	ENSMUSG00000029471	ENSMUSG00000029471.13	ENSMUST00000200109.4	CAMKK2	ENSG00000110931	ENSP00000312741	1	0.0388	0.5861	100	91.3265	91.3265	ortholog_one2one	NM_145358	Dazl.target
Camsap1	ENSMUST00000114167	ENSMUSG00000026933	ENSMUSG00000026933.17	ENSMUST00000114167.8	CAMSAP1	ENSG00000130559	ENSP00000374183	1	0.0787	0.7779	100	84.8939	85.9671	ortholog_one2one	NM_001276359	Dazl.target
Cand1	ENSMUST00000020315	ENSMUSG00000020114	ENSMUSG00000020114.12	ENSMUST00000020315.12	CAND1	ENSG00000111530	ENSP00000442318	1	0.0027	0.5551	100	99.4309	99.4309	ortholog_one2one	NM_027994	Dazl.target
Cand2	ENSMUST00000075995	ENSMUSG00000030319	ENSMUSG00000030319.8	ENSMUST00000075995.6	CAND2	ENSG00000144712	ENSP00000387641	1	0.0472	0.81	75	90.534	90.6073	ortholog_one2one	NM_025958	Dazl.target
Canx	ENSMUST00000179865	ENSMUSG00000020368	ENSMUSG00000020368.15	ENSMUST00000179865.7	CANX	ENSG00000127022	ENSP00000247461	1	0.0309	0.5044	100	93.2432	93.401	ortholog_one2one	NM_001110499	Dazl.target
Capn7	ENSMUST00000022451	ENSMUSG00000021893	ENSMUSG00000021893.14	ENSMUST00000022451.13	CAPN7	ENSG00000131375	ENSP00000253693	1	0.024	0.4597	50	95.2029	95.2029	ortholog_one2one	NM_009796	Dazl.target
Caprin1	ENSMUST00000028607	ENSMUSG00000027184	ENSMUSG00000027184.14	ENSMUST00000028607.12	CAPRIN1	ENSG00000135387	ENSP00000340329	1	0.014	0.3442	100	96.756	97.0297	ortholog_one2one	NM_016739	Dazl.target
Capza2	ENSMUST00000015877	ENSMUSG00000015733	ENSMUSG00000015733.13	ENSMUST00000015877.13	CAPZA2	ENSG00000198898	ENSP00000354947	1	0.0078	0.2941	100	98.2517	98.2517	ortholog_one2one	NM_007604	Dazl.target
Casc3	ENSMUST00000169695	ENSMUSG00000078676	ENSMUSG00000078676.9	ENSMUST00000169695.1	CASC3	ENSG00000108349	ENSP00000264645	1	0.0518	0.3965	100	90.0427	90.6877	ortholog_one2one	NM_138660	Dazl.target
Casc4	ENSMUST00000110586	ENSMUSG00000060227	ENSMUSG00000060227.15	ENSMUST00000110586.9	CASC4	ENSG00000166734	ENSP00000299957	1	0.0497	0.2668	75	89.6789	89.8851	ortholog_one2one	NM_001205370	Dazl.target
Casp2	ENSMUST00000031895	ENSMUSG00000029863	ENSMUSG00000029863.13	ENSMUST00000031895.12	CASP2	ENSG00000106144	ENSP00000312664	1	0.0613	0.4893	100	89.3805	89.3805	ortholog_one2one	NM_007610	Dazl.target
Casp7	ENSMUST00000026062	ENSMUSG00000025076	ENSMUSG00000025076.11	ENSMUST00000026062.9	CASP7	ENSG00000165806	ENSP00000358327	1	0.1694	0.9133	100	59.5361	76.2376	ortholog_one2one	NM_007611	Dazl.target
Casp9	ENSMUST00000030747	ENSMUSG00000028914	ENSMUSG00000028914.13	ENSMUST00000030747.10	CASP9	ENSG00000132906	ENSP00000330237	1	0.1345	0.567	75	77.6442	71.1454	ortholog_one2one	NM_015733	Dazl.target
Cbfb	ENSMUST00000052209	ENSMUSG00000031885	ENSMUSG00000031885.14	ENSMUST00000052209.8	CBFB	ENSG00000067955	ENSP00000415151	1	0.005	0.2476	100	98.9305	98.9305	ortholog_one2one	NM_022309	Dazl.target
Cbl	ENSMUST00000206720	ENSMUSG00000034342	ENSMUSG00000034342.9	ENSMUST00000206720.1	CBL	ENSG00000110395	ENSP00000264033	1	0.0396	0.4458	100	92.2737	91.5663	ortholog_one2one	NM_007619	Dazl.target
Cblb	ENSMUST00000114471	ENSMUSG00000022637	ENSMUSG00000022637.11	ENSMUST00000114471.2	CBLB	ENSG00000114423	ENSP00000499037	1	0.0202	0.5556	100	88.8119	95.629	ortholog_one2one	NM_001033238	Dazl.target
Cbll1	ENSMUST00000185739	ENSMUSG00000020659	ENSMUSG00000020659.16	ENSMUST00000185739.7	CBLL1	ENSG00000105879	ENSP00000401277	1	0.0126	0.2435	100	97.3523	97.3523	ortholog_one2one	NM_134048	Dazl.target
Cbx2	ENSMUST00000026662	ENSMUSG00000025577	ENSMUSG00000025577.7	ENSMUST00000026662.7	CBX2	ENSG00000173894	ENSP00000308750	1	0.0842	1.0393	100	82.1429	84.2004	ortholog_one2one	NM_007623	Dazl.target
Cbx8	ENSMUST00000026663	ENSMUSG00000025578	ENSMUSG00000025578.9	ENSMUST00000026663.7	CBX8	ENSG00000141570	ENSP00000269385	1	0.036	0.6895	100	86.6324	93.0939	ortholog_one2one	NM_013926	Dazl.target
Ccar1	ENSMUST00000219527	ENSMUSG00000020074	ENSMUSG00000020074.7	ENSMUST00000219527.1	CCAR1	ENSG00000060339	ENSP00000265872	1	0.0219	0.4087	100	94.7826	95.1134	ortholog_one2one	NM_026201	Dazl.target
Ccdc112	ENSMUST00000072835	ENSMUSG00000071855	ENSMUSG00000071855.5	ENSMUST00000072835.6	CCDC112	ENSG00000164221	ENSP00000368931	1	0.0764	0.7831	100	84.8771	85.5238	ortholog_one2one	NM_001160399	Dazl.target
Ccdc117	ENSMUST00000020776	ENSMUSG00000020482	ENSMUSG00000020482.4	ENSMUST00000020776.4	CCDC117	ENSG00000159873	ENSP00000249064	1	0.1322	0.4728	50	78.1362	78.7004	ortholog_one2one	NM_134033	Dazl.target
Ccdc12	ENSMUST00000019803	ENSMUSG00000019659	ENSMUSG00000019659.8	ENSMUST00000019803.8	CCDC12	ENSG00000160799	ENSP00000292314	1	0.035	0.6017	100	79.3296	85.5422	ortholog_one2one	NM_028312	Dazl.target
Ccdc127	ENSMUST00000022063	ENSMUSG00000021578	ENSMUSG00000021578.17	ENSMUST00000022063.13	CCDC127	ENSG00000164366	ENSP00000296824	1	0.0951	0.8238	75	82.6923	82.6923	ortholog_one2one	NM_001168659	Dazl.target
Ccdc138	ENSMUST00000036576	ENSMUSG00000038010	ENSMUSG00000038010.9	ENSMUST00000036576.9	CCDC138	ENSG00000163006	ENSP00000295124	1	0.1226	0.5906	100	78.797	77.0588	ortholog_one2one	NM_001162956	Dazl.target
Ccdc175	ENSMUST00000021494	ENSMUSG00000021086	ENSMUSG00000021086.5	ENSMUST00000021494.5	CCDC175	ENSG00000151838	ENSP00000453940	0	0.4526	0.8556	100	50.3153	48.5401	ortholog_one2one	NM_028687	Dazl.target
Ccdc25	ENSMUST00000022614	ENSMUSG00000022035	ENSMUSG00000022035.6	ENSMUST00000022614.6	CCDC25	ENSG00000147419	ENSP00000348933	1	0.0193	0.3879	100	95.6731	95.6731	ortholog_one2one	NM_145944	Dazl.target
Ccdc43	ENSMUST00000092569	ENSMUSG00000020925	ENSMUSG00000020925.16	ENSMUST00000092569.12	CCDC43	ENSG00000180329	ENSP00000323782	1	0.0621	0.5761	100	88.8393	89.6396	ortholog_one2one	NM_025918	Dazl.target
Ccdc6	ENSMUST00000147545	ENSMUSG00000048701	ENSMUSG00000048701.13	ENSMUST00000147545.7	CCDC6	ENSG00000108091	ENSP00000263102	1	0.0169	0.7213	100	94.5148	95.5224	ortholog_one2one	NM_001111121	Dazl.target
Ccdc71l	ENSMUST00000172332	ENSMUSG00000090946	ENSMUSG00000090946.3	ENSMUST00000172332.3	CCDC71L	ENSG00000253276	ENSP00000430897	1	0.1357	0.584	100	69.7872	75.2294	ortholog_one2one	NM_001162903	Dazl.target
Ccdc73	ENSMUST00000111114	ENSMUSG00000045106	ENSMUSG00000045106.12	ENSMUST00000111114.7	CCDC73	ENSG00000186714	ENSP00000335325	1	0.2824	0.5353	100	60.3336	61.0694	ortholog_one2one	NM_177600	Dazl.target
Ccnc	ENSMUST00000108240	ENSMUSG00000028252	ENSMUSG00000028252.20	ENSMUST00000108240.2	CCNC	ENSG00000112237	ENSP00000428982	1	0.0032	0.2616	75	99.2933	99.2933	ortholog_one2one	NM_001122982	Dazl.target
Ccnd1	ENSMUST00000093962	ENSMUSG00000070348	ENSMUSG00000070348.5	ENSMUST00000093962.4	CCND1	ENSG00000110092	ENSP00000227507	1	0.0274	0.8284	100	93.8983	93.8983	ortholog_one2one	NM_007631	Dazl.target
Ccng1	ENSMUST00000020576	ENSMUSG00000020326	ENSMUSG00000020326.7	ENSMUST00000020576.7	CCNG1	ENSG00000113328	ENSP00000344635	1	0.04	0.3464	100	92.2034	92.517	ortholog_one2one	NM_009831	Dazl.target
Ccni	ENSMUST00000058550	ENSMUSG00000063015	ENSMUSG00000063015.12	ENSMUST00000058550.14	CCNI	ENSG00000118816	ENSP00000237654	1	0.0308	0.1966	75	93.3687	93.3687	ortholog_one2one	NM_017367	Dazl.target
Ccnjl	ENSMUST00000050574	ENSMUSG00000044707	ENSMUSG00000044707.7	ENSMUST00000050574.6	CCNJL	ENSG00000135083	ENSP00000377547	1	0.0492	0.6574	100	79.3103	89.1473	ortholog_one2one	NM_001045530	Dazl.target
Ccnk	ENSMUST00000221167	ENSMUSG00000021258	ENSMUSG00000021258.10	ENSMUST00000221167.1	CCNK	ENSG00000090061	ENSP00000374529	1	0.0196	0.3985	100	96.0345	95.7045	ortholog_one2one	NM_009832	Dazl.target
Ccnl1	ENSMUST00000029416	ENSMUSG00000027829	ENSMUSG00000027829.15	ENSMUST00000029416.13	CCNL1	ENSG00000163660	ENSP00000295926	1	0.0105	0.2982	100	97.7186	96.6165	ortholog_one2one	NM_019937	Dazl.target
Ccnl2	ENSMUST00000030944	ENSMUSG00000029068	ENSMUSG00000029068.16	ENSMUST00000030944.10	CCNL2	ENSG00000221978	ENSP00000383611	1	0.0518	0.6635	100	88.8462	89.1892	ortholog_one2one	NM_207678	Dazl.target
Ccny	ENSMUST00000053917	ENSMUSG00000024286	ENSMUSG00000024286.8	ENSMUST00000053917.5	CCNY	ENSG00000108100	ENSP00000363836	1	0.0094	0.3884	50	98.2405	98.2405	ortholog_one2one	NM_026484	Dazl.target
Ccp110	ENSMUST00000106557	ENSMUSG00000033904	ENSMUSG00000033904.16	ENSMUST00000106557.7	CCP110	ENSG00000103540	ENSP00000370803	1	0.161	0.5527	100	72.4308	73.008	ortholog_one2one	NM_182995	Dazl.target
Ccpg1	ENSMUST00000150826	ENSMUSG00000034563	ENSMUSG00000034563.16	ENSMUST00000150826.8	CCPG1	ENSG00000260916	ENSP00000403400	1	0.1858	0.762	100	69.5167	69.863	ortholog_one2one	NM_001114328	Dazl.target
Cct3	ENSMUST00000001452	ENSMUSG00000001416	ENSMUSG00000001416.13	ENSMUST00000001452.13	CCT3	ENSG00000163468	ENSP00000295688	1	0.0137	0.4951	100	97.2477	97.2477	ortholog_one2one	NM_009836	Dazl.target
Cct4	ENSMUST00000173867	ENSMUSG00000007739	ENSMUSG00000007739.10	ENSMUST00000173867.7	CCT4	ENSG00000115484	ENSP00000377958	1	0.0158	0.3979	75	96.6605	96.6605	ortholog_one2one	NM_009837	Dazl.target
Cct6a	ENSMUST00000031402	ENSMUSG00000029447	ENSMUSG00000029447.11	ENSMUST00000031402.11	CCT6A	ENSG00000146731	ENSP00000275603	1	0.0656	0.6348	100	90.0188	89.8496	ortholog_one2one	NM_009838	Dazl.target
Cct7	ENSMUST00000032078	ENSMUSG00000030007	ENSMUSG00000030007.8	ENSMUST00000032078.8	CCT7	ENSG00000135624	ENSP00000258091	1	0.0212	0.4769	100	95.396	95.2206	ortholog_one2one	NM_007638	Dazl.target
Cct8	ENSMUST00000026704	ENSMUSG00000025613	ENSMUSG00000025613.13	ENSMUST00000026704.13	CCT8	ENSG00000156261	ENSP00000286788	1	0.0181	0.61	100	96.7153	96.7153	ortholog_one2one	NM_009840	Dazl.target
Cd164	ENSMUST00000019962	ENSMUSG00000019818	ENSMUSG00000019818.15	ENSMUST00000019962.14	CD164	ENSG00000135535	ENSP00000309376	1	0.2749	0.4123	100	61.4213	61.4213	ortholog_one2one	NM_016898	Dazl.target
Cd9	ENSMUST00000032492	ENSMUSG00000030342	ENSMUSG00000030342.8	ENSMUST00000032492.8	CD9	ENSG00000010278	ENSP00000371958	1	0.0626	0.7542	100	88.5965	89.3805	ortholog_one2one	NM_007657	Dazl.target
Cdc20	ENSMUST00000006565	ENSMUSG00000006398	ENSMUSG00000006398.15	ENSMUST00000006565.12	CDC20	ENSG00000117399	ENSP00000361540	1	0.0269	0.5177	100	94.7896	94.7896	ortholog_one2one	NM_023223	Dazl.target
Cdc23	ENSMUST00000133181	ENSMUSG00000024370	ENSMUSG00000024370.17	ENSMUST00000133181.1	CDC23	ENSG00000094880	ENSP00000378350	1	0.0239	0.4988	100	95.4774	95.4774	ortholog_one2one	NM_178347	Dazl.target
Cdc25a	ENSMUST00000094324	ENSMUSG00000032477	ENSMUSG00000032477.14	ENSMUST00000094324.7	CDC25A	ENSG00000164045	ENSP00000303706	1	0.0821	0.4432	100	83.7786	85.4086	ortholog_one2one	NM_007658	Dazl.target
Cdc27	ENSMUST00000093923	ENSMUSG00000020687	ENSMUSG00000020687.13	ENSMUST00000093923.8	CDC27	ENSG00000004897	ENSP00000434614	1	0.0132	0.3058	50	96.3855	96.9697	ortholog_one2one	NM_001285989	Dazl.target
Cdc37l1	ENSMUST00000225310	ENSMUSG00000024780	ENSMUSG00000024780.7	ENSMUST00000225310.1	CDC37L1	ENSG00000106993	ENSP00000371278	1	0.0547	0.3945	100	88.724	89.2537	ortholog_one2one	NM_001302382	Dazl.target
Cdc40	ENSMUST00000044166	ENSMUSG00000038446	ENSMUSG00000038446.8	ENSMUST00000044166.8	CDC40	ENSG00000168438	ENSP00000357928	1	0.0056	0.3901	100	98.791	98.791	ortholog_one2one	NM_027879	Dazl.target
Cdc42	ENSMUST00000051477	ENSMUSG00000006699	ENSMUSG00000006699.17	ENSMUST00000051477.12	CDC42	ENSG00000070831	ENSP00000497733	1	0	0	100	100	100	ortholog_one2one	NM_009861	Dazl.target
Cdc42bpb	ENSMUST00000041965	ENSMUSG00000021279	ENSMUSG00000021279.5	ENSMUST00000041965.4	CDC42BPB	ENSG00000198752	ENSP00000355237	1	0.0401	0.7712	100	91.8761	91.7688	ortholog_one2one	NM_183016	Dazl.target
Cdc42ep4	ENSMUST00000106616	ENSMUSG00000041598	ENSMUSG00000041598.7	ENSMUST00000106616.1	CDC42EP4	ENSG00000179604	ENSP00000338258	1	0.1135	1.0146	100	76.9663	78.51	ortholog_one2one	NM_020006	Dazl.target
Cdc42se2	ENSMUST00000064104	ENSMUSG00000052298	ENSMUSG00000052298.12	ENSMUST00000064104.12	CDC42SE2	ENSG00000158985	ENSP00000427421	1	0	0	100	100	100	ortholog_one2one	NM_178626	Dazl.target
Cdc7	ENSMUST00000118261	ENSMUSG00000029283	ENSMUSG00000029283.17	ENSMUST00000118261.7	CDC7	ENSG00000097046	ENSP00000393139	1	0.1149	0.5111	100	78.9199	80.3191	ortholog_one2one	NM_001271566	Dazl.target
Cdc73	ENSMUST00000018337	ENSMUSG00000026361	ENSMUSG00000026361.9	ENSMUST00000018337.8	CDC73	ENSG00000134371	ENSP00000356405	1	0	0	75	100	100	ortholog_one2one	NM_145991	Dazl.target
Cdca4	ENSMUST00000062092	ENSMUSG00000047832	ENSMUSG00000047832.9	ENSMUST00000062092.6	CDCA4	ENSG00000170779	ENSP00000337226	1	NA	NA	100	73.029	74.2616	ortholog_one2one	NM_028023	Dazl.target
Cdca7	ENSMUST00000102691	ENSMUSG00000055612	ENSMUSG00000055612.15	ENSMUST00000102691.10	CDCA7	ENSG00000144354	ENSP00000306968	1	0.0837	0.6492	100	70.2222	82.7225	ortholog_one2one	NM_025866	Dazl.target
Cdca7l	ENSMUST00000021592	ENSMUSG00000021175	ENSMUSG00000021175.15	ENSMUST00000021592.15	CDCA7L	ENSG00000164649	ENSP00000383986	1	0.1282	0.7319	75	75.5507	78.3105	ortholog_one2one	NM_146040	Dazl.target
Cdca8	ENSMUST00000084296	ENSMUSG00000028873	ENSMUSG00000028873.16	ENSMUST00000084296.9	CDCA8	ENSG00000134690	ENSP00000362146	1	0.1343	0.5973	100	76.0714	73.7024	ortholog_one2one	NM_026560	Dazl.target
Cdk13	ENSMUST00000223490	ENSMUSG00000041297	ENSMUSG00000041297.8	ENSMUST00000223490.1	CDK13	ENSG00000065883	ENSP00000181839	1	0.0221	0.2461	100	95.172	95.2349	ortholog_one2one	NM_027118	Dazl.target
Cdk17	ENSMUST00000069965	ENSMUSG00000020015	ENSMUSG00000020015.10	ENSMUST00000069965.8	CDK17	ENSG00000059758	ENSP00000261211	1	0.0063	0.4341	100	98.6616	98.6616	ortholog_one2one	NM_146239	Dazl.target
Cdk2	ENSMUST00000026415	ENSMUSG00000025358	ENSMUSG00000025358.16	ENSMUST00000026415.8	CDK2	ENSG00000123374	ENSP00000266970	1	0.005	0.2929	100	98.3222	84.6821	ortholog_one2one	NM_016756	Dazl.target
Cdk6	ENSMUST00000165117	ENSMUSG00000040274	ENSMUSG00000040274.11	ENSMUST00000165117.7	CDK6	ENSG00000105810	ENSP00000265734	1	0.0193	0.4144	50	96.319	96.319	ortholog_one2one	NM_009873	Dazl.target
Cdk8	ENSMUST00000031640	ENSMUSG00000029635	ENSMUSG00000029635.15	ENSMUST00000031640.14	CDK8	ENSG00000132964	ENSP00000370938	1	0.0194	0.3103	75	96.7672	96.7672	ortholog_one2one	NM_153599	Dazl.target
Cdk9	ENSMUST00000009699	ENSMUSG00000009555	ENSMUSG00000009555.16	ENSMUST00000009699.15	CDK9	ENSG00000136807	ENSP00000362361	1	0.0057	0.969	100	98.6559	98.6559	ortholog_one2one	NM_130860	Dazl.target
Cdkn1b	ENSMUST00000003115	ENSMUSG00000003031	ENSMUSG00000003031.14	ENSMUST00000003115.8	CDKN1B	ENSG00000111276	ENSP00000228872	1	0.0535	0.5142	100	87.8788	88.3249	ortholog_one2one	NM_009875	Dazl.target
Cdkn2aipnl	ENSMUST00000102763	ENSMUSG00000020392	ENSMUSG00000020392.8	ENSMUST00000102763.4	CDKN2AIPNL	ENSG00000237190	ENSP00000394183	1	0.0193	0.7104	100	95.6897	95.6897	ortholog_one2one	NM_029976	Dazl.target
Cdon	ENSMUST00000042842	ENSMUSG00000038119	ENSMUSG00000038119.15	ENSMUST00000042842.5	CDON	ENSG00000064309	ENSP00000376458	1	0.1039	0.5727	100	80.0311	82.4	ortholog_one2one	NM_021339	Dazl.target
Cds2	ENSMUST00000103181	ENSMUSG00000058793	ENSMUSG00000058793.14	ENSMUST00000103181.10	CDS2	ENSG00000101290	ENSP00000419879	1	0.0211	0.5704	100	95.7303	95.9459	ortholog_one2one	NM_138651	Dazl.target
Cdt1	ENSMUST00000006760	ENSMUSG00000006585	ENSMUSG00000006585.3	ENSMUST00000006760.2	CDT1	ENSG00000167513	ENSP00000301019	1	0.1798	1.5532	100	70.5128	69.1203	ortholog_one2one	NM_026014	Dazl.target
Cdyl	ENSMUST00000163595	ENSMUSG00000059288	ENSMUSG00000059288.14	ENSMUST00000163595.2	CDYL	ENSG00000153046	ENSP00000380718	1	0.0443	0.6913	75	91.5441	83.9798	ortholog_one2one	NM_001123386	Dazl.target
Cebpb	ENSMUST00000070642	ENSMUSG00000056501	ENSMUSG00000056501.3	ENSMUST00000070642.3	CEBPB	ENSG00000172216	ENSP00000305422	1	0.1043	0.7734	75	68.9855	80.4054	ortholog_one2one	NM_001287738	Dazl.target
Cecr2	ENSMUST00000112686	ENSMUSG00000071226	ENSMUSG00000071226.11	ENSMUST00000112686.7	CECR2	ENSG00000099954	ENSP00000383428	1	0.1148	0.511	100	77.5385	70.7368	ortholog_one2one	NM_001128151	Dazl.target
Celf1	ENSMUST00000005643	ENSMUSG00000005506	ENSMUSG00000005506.16	ENSMUST00000005643.13	CELF1	ENSG00000149187	ENSP00000436864	1	0.0018	0.2572	100	99.4163	99.6101	ortholog_one2one	NM_017368	Dazl.target
Celf2	ENSMUST00000182706	ENSMUSG00000002107	ENSMUSG00000002107.18	ENSMUST00000182706.7	CELF2	ENSG00000048740	ENSP00000488422	1	0.0355	0.2636	100	91.9325	93.1559	ortholog_one2one	NM_001110229	Dazl.target
Cenpa	ENSMUST00000144742	ENSMUSG00000029177	ENSMUSG00000029177.9	ENSMUST00000144742.5	CENPA	ENSG00000115163	ENSP00000336868	1	0.1939	1.1931	100	67.8571	70.8955	ortholog_one2one	NM_001302129	Dazl.target
Cenpf	ENSMUST00000171929	ENSMUSG00000026605	ENSMUSG00000026605.14	ENSMUST00000171929.7	CENPF	ENSG00000117724	ENSP00000355922	1	0.2213	0.6072	100	64.1618	66.6667	ortholog_one2one	NM_001081363	Dazl.target
Cenpq	ENSMUST00000087114	ENSMUSG00000023919	ENSMUSG00000023919.7	ENSMUST00000087114.3	CENPQ	ENSG00000031691	ENSP00000337289	1	0.2401	0.63	100	64.5522	64.3123	ortholog_one2one	NM_031863	Dazl.target
Cep170	ENSMUST00000057037	ENSMUSG00000057335	ENSMUSG00000057335.11	ENSMUST00000057037.12	CEP170	ENSG00000143702	ENSP00000355500	1	0.0511	0.4548	100	89.1414	89.4804	ortholog_one2one	NM_001099637	Dazl.target
Cep55	ENSMUST00000169673	ENSMUSG00000024989	ENSMUSG00000024989.15	ENSMUST00000169673.2	CEP55	ENSG00000138180	ENSP00000360540	1	0.154	0.608	100	75	75.3247	ortholog_one2one	NM_001164362	Dazl.target
Cep72	ENSMUST00000036456	ENSMUSG00000021572	ENSMUSG00000021572.9	ENSMUST00000036456.7	CEP72	ENSG00000112877	ENSP00000264935	1	0.2514	0.871	100	63.8331	63.9319	ortholog_one2one	NM_028959	Dazl.target
Cep85	ENSMUST00000040271	ENSMUSG00000037443	ENSMUSG00000037443.13	ENSMUST00000040271.11	CEP85	ENSG00000130695	ENSP00000252992	1	0.0822	0.411	100	85.3018	85.4139	ortholog_one2one	NM_144527	Dazl.target
Cers2	ENSMUST00000015858	ENSMUSG00000015714	ENSMUSG00000015714.11	ENSMUST00000015858.11	CERS2	ENSG00000143418	ENSP00000271688	1	0.0364	0.329	100	92.3684	92.3684	ortholog_one2one	NM_029789	Dazl.target
Cers6	ENSMUST00000028426	ENSMUSG00000027035	ENSMUSG00000027035.10	ENSMUST00000028426.8	CERS6	ENSG00000172292	ENSP00000376453	1	0.022	0.3861	100	95.4082	95.4082	ortholog_one2one	NM_172856	Dazl.target
Cetn2	ENSMUST00000114551	ENSMUSG00000031347	ENSMUSG00000031347.12	ENSMUST00000114551.9	CETN2	ENSG00000147400	ENSP00000359300	1	0.0179	0.4917	100	95.9302	95.9302	ortholog_one2one	NM_019405	Dazl.target
Cetn3	ENSMUST00000022009	ENSMUSG00000021537	ENSMUSG00000021537.9	ENSMUST00000022009.9	CETN3	ENSG00000153140	ENSP00000428259	1	0.0079	0.8103	100	85.8639	98.2036	ortholog_one2one	NM_007684	Dazl.target
Cfdp1	ENSMUST00000034432	ENSMUSG00000031954	ENSMUSG00000031954.6	ENSMUST00000034432.6	CFDP1	ENSG00000153774	ENSP00000283882	1	0.0899	0.5773	100	82.9431	84.0678	ortholog_one2one	NM_011801	Dazl.target
Cfl2	ENSMUST00000078124	ENSMUSG00000062929	ENSMUSG00000062929.8	ENSMUST00000078124.7	CFL2	ENSG00000165410	ENSP00000298159	1	0.0027	0.2026	100	99.3976	99.3976	ortholog_one2one	NM_007688	Dazl.target
Champ1	ENSMUST00000051870	ENSMUSG00000047710	ENSMUSG00000047710.8	ENSMUST00000051870.7	CHAMP1	ENSG00000198824	ENSP00000496699	1	0.1407	0.6534	50	75.8621	76.808	ortholog_one2one	NM_181854	Dazl.target
Chchd2	ENSMUST00000094280	ENSMUSG00000070493	ENSMUSG00000070493.3	ENSMUST00000094280.3	CHCHD2	ENSG00000106153	ENSP00000378812	1	0.101	0.5433	75	86.0927	84.9673	ortholog_one2one	NM_024166	Dazl.target
Chd6	ENSMUST00000039782	ENSMUSG00000057133	ENSMUSG00000057133.14	ENSMUST00000039782.13	CHD6	ENSG00000124177	ENSP00000362330	1	0.0579	0.4211	100	88.582	88.7127	ortholog_one2one	NM_173368	Dazl.target
Chd7	ENSMUST00000051558	ENSMUSG00000041235	ENSMUSG00000041235.12	ENSMUST00000051558.9	CHD7	ENSG00000171316	ENSP00000392028	1	0.0234	0.4057	100	94.8282	95.1775	ortholog_one2one	NM_001277149	Dazl.target
Cherp	ENSMUST00000212991	ENSMUSG00000052488	ENSMUSG00000052488.7	ENSMUST00000212991.1	CHERP	ENSG00000085872	ENSP00000439856	1	0.024	1.2318	75	95.1965	92.9638	ortholog_one2one	NM_138585	Dazl.target
Chfr	ENSMUST00000112519	ENSMUSG00000014668	ENSMUSG00000014668.15	ENSMUST00000112519.8	CHFR	ENSG00000072609	ENSP00000392395	1	0.0979	0.5824	75	82.0783	82.0783	ortholog_one2one	NM_001289577	Dazl.target
Chic2	ENSMUST00000075452	ENSMUSG00000029229	ENSMUSG00000029229.8	ENSMUST00000075452.6	CHIC2	ENSG00000109220	ENSP00000263921	1	0.0027	0.1832	100	99.3939	99.3939	ortholog_one2one	NM_028850	Dazl.target
Chml	ENSMUST00000211207	ENSMUSG00000078185	ENSMUSG00000078185.3	ENSMUST00000211207.1	CHML	ENSG00000203668	ENSP00000355511	1	0.1166	0.5422	100	75.4573	79.7101	ortholog_one2one	NM_021350	Dazl.target
Chmp1a	ENSMUST00000000759	ENSMUSG00000000743	ENSMUSG00000000743.9	ENSMUST00000000759.8	CHMP1A	ENSG00000131165	ENSP00000380998	1	0.0106	0.7605	100	97.449	97.449	ortholog_one2one	NM_145606	Dazl.target
Chmp1b	ENSMUST00000210564	ENSMUSG00000109901	ENSMUSG00000109901.2	ENSMUST00000210564.2	CHMP1B	ENSG00000255112	ENSP00000432279	1	0.0085	0.449	75	97.99	97.99	ortholog_one2one	NM_024190	Dazl.target
Chmp4b	ENSMUST00000044277	ENSMUSG00000038467	ENSMUSG00000038467.15	ENSMUST00000044277.9	CHMP4B	ENSG00000101421	ENSP00000217402	1	0.0019	0.5288	100	99.5536	99.5536	ortholog_one2one	NM_029362	Dazl.target
Chmp7	ENSMUST00000036381	ENSMUSG00000034190	ENSMUSG00000034190.9	ENSMUST00000036381.9	CHMP7	ENSG00000147457	ENSP00000380794	1	0.0214	0.4407	50	95.1435	95.5654	ortholog_one2one	NM_134078	Dazl.target
Chn1	ENSMUST00000180045	ENSMUSG00000056486	ENSMUSG00000056486.18	ENSMUST00000180045.7	CHN1	ENSG00000128656	ENSP00000386741	1	0.0172	0.3134	100	96.2963	96.2963	ortholog_one2one	NM_001113246	Dazl.target
Chordc1	ENSMUST00000001825	ENSMUSG00000001774	ENSMUSG00000001774.8	ENSMUST00000001825.8	CHORDC1	ENSG00000110172	ENSP00000319255	1	0.0206	0.4445	100	94.8795	95.1662	ortholog_one2one	NM_025844	Dazl.target
Chp1	ENSMUST00000014221	ENSMUSG00000014077	ENSMUSG00000014077.13	ENSMUST00000014221.12	CHP1	ENSG00000187446	ENSP00000335632	1	0.0044	0.4285	100	98.9744	98.9744	ortholog_one2one	NM_019769	Dazl.target
Chsy1	ENSMUST00000036372	ENSMUSG00000032640	ENSMUSG00000032640.10	ENSMUST00000036372.7	CHSY1	ENSG00000131873	ENSP00000254190	1	0.0255	0.7212	100	94.389	94.625	ortholog_one2one	NM_001081163	Dazl.target
Chtop	ENSMUST00000049937	ENSMUSG00000001017	ENSMUSG00000001017.15	ENSMUST00000049937.12	CHTOP	ENSG00000160679	ENSP00000357679	1	0.0041	0.085	100	99.1968	99.1968	ortholog_one2one	NM_001293777	Dazl.target
Chuk	ENSMUST00000119591	ENSMUSG00000025199	ENSMUSG00000025199.16	ENSMUST00000119591.1	CHUK	ENSG00000213341	ENSP00000359424	1	0.023	0.2853	100	95.302	95.302	ortholog_one2one	NM_001162410	Dazl.target
Ciao1	ENSMUST00000003759	ENSMUSG00000003662	ENSMUSG00000003662.10	ENSMUST00000003759.10	CIAO1	ENSG00000144021	ENSP00000418287	1	0.0251	0.5073	100	94.9853	94.9853	ortholog_one2one	NM_025296	Dazl.target
Ciapin1	ENSMUST00000162538	ENSMUSG00000031781	ENSMUSG00000031781.14	ENSMUST00000162538.8	CIAPIN1	ENSG00000005194	ENSP00000377914	1	0.109	0.5875	100	79.8077	80.5825	ortholog_one2one	NM_134141	Dazl.target
Cib1	ENSMUST00000065163	ENSMUSG00000030538	ENSMUSG00000030538.15	ENSMUST00000065163.14	CIB1	ENSG00000185043	ENSP00000479860	1	0.0299	0.6222	75	77.0563	93.1937	ortholog_one2one	NM_011870	Dazl.target
Cirbp	ENSMUST00000105365	ENSMUSG00000045193	ENSMUSG00000045193.13	ENSMUST00000105365.8	CIRBP	ENSG00000099622	ENSP00000466025	1	0.0288	0.6852	100	55.2189	95.3488	ortholog_one2one	NM_007705	Dazl.target
Cited2	ENSMUST00000038107	ENSMUSG00000039910	ENSMUSG00000039910.10	ENSMUST00000038107.8	CITED2	ENSG00000164442	ENSP00000444198	1	0.018	0.3033	75	92.3636	94.4238	ortholog_one2one	NM_010828	Dazl.target
Ciz1	ENSMUST00000048964	ENSMUSG00000039205	ENSMUSG00000039205.16	ENSMUST00000048964.13	CIZ1	ENSG00000148337	ENSP00000439244	1	0.201	0.6062	100	60.7966	68.6391	ortholog_one2one	NM_028412	Dazl.target
Ckap2	ENSMUST00000046916	ENSMUSG00000037725	ENSMUSG00000037725.8	ENSMUST00000046916.8	CKAP2	ENSG00000136108	ENSP00000367276	1	0.2506	0.6289	50	59.7365	61.4458	ortholog_one2one	NM_001004140	Dazl.target
Ckap5	ENSMUST00000099716	ENSMUSG00000040549	ENSMUSG00000040549.16	ENSMUST00000099716.10	CKAP5	ENSG00000175216	ENSP00000432768	1	0.0246	0.3701	100	94.9311	94.9311	ortholog_one2one	NM_001165989	Dazl.target
Cks1b	ENSMUST00000029679	ENSMUSG00000028044	ENSMUSG00000028044.6	ENSMUST00000029679.3	CKS1B	ENSG00000173207	ENSP00000311083	1	0	0	100	100	100	ortholog_one2one	NM_016904	Dazl.target
Clasp1	ENSMUST00000178710	ENSMUSG00000064302	ENSMUSG00000064302.13	ENSMUST00000178710.7	CLASP1	ENSG00000074054	ENSP00000263710	1	0.0095	0.4801	100	92.5878	97.0027	ortholog_one2one	NM_001293301	Dazl.target
Clasp2	ENSMUST00000166734	ENSMUSG00000033392	ENSMUSG00000033392.16	ENSMUST00000166734.9	CLASP2	ENSG00000163539	ENSP00000327760	0	NA	NA	100	87.1179	31.0023	ortholog_one2one	NM_001114347	Dazl.target
Clic4	ENSMUST00000037099	ENSMUSG00000037242	ENSMUSG00000037242.8	ENSMUST00000037099.8	CLIC4	ENSG00000169504	ENSP00000363500	1	0.0055	0.6786	100	98.8142	98.8142	ortholog_one2one	NM_013885	Dazl.target
Clic6	ENSMUST00000023670	ENSMUSG00000022949	ENSMUSG00000022949.9	ENSMUST00000023670.3	CLIC6	ENSG00000159212	ENSP00000353959	1	0.2169	1.2495	100	55.9659	66.1074	ortholog_one2one	NM_172469	Dazl.target
Clint1	ENSMUST00000109260	ENSMUSG00000006169	ENSMUSG00000006169.20	ENSMUST00000109260.2	CLINT1	ENSG00000113282	ENSP00000429824	1	0.0275	0.4068	100	94.2457	94.5398	ortholog_one2one	NM_001045520	Dazl.target
Clns1a	ENSMUST00000026506	ENSMUSG00000025439	ENSMUSG00000025439.5	ENSMUST00000026506.4	CLNS1A	ENSG00000074201	ENSP00000433919	1	0.045	0.4261	75	90.7173	89.2116	ortholog_one2one	NM_023671	Dazl.target
Clock	ENSMUST00000075159	ENSMUSG00000029238	ENSMUSG00000029238.11	ENSMUST00000075159.4	CLOCK	ENSG00000134852	ENSP00000426983	1	0.0225	0.3965	100	95.5083	94.5029	ortholog_one2one	NM_007715	Dazl.target
Clptm1l	ENSMUST00000022102	ENSMUSG00000021610	ENSMUSG00000021610.8	ENSMUST00000022102.8	CLPTM1L	ENSG00000049656	ENSP00000313854	1	0.0355	0.6735	100	92.9368	92.7644	ortholog_one2one	NM_146047	Dazl.target
Clstn1	ENSMUST00000105691	ENSMUSG00000039953	ENSMUSG00000039953.13	ENSMUST00000105691.7	CLSTN1	ENSG00000171603	ENSP00000366513	1	0.0385	0.8777	100	92.3547	92.5434	ortholog_one2one	NM_001290989	Dazl.target
Clta	ENSMUST00000107845	ENSMUSG00000028478	ENSMUSG00000028478.18	ENSMUST00000107845.3	CLTA	ENSG00000122705	ENSP00000242285	1	0.0061	0.3012	100	98.7903	98.7903	ortholog_one2one	NM_001080386	Dazl.target
Cltc	ENSMUST00000103186	ENSMUSG00000047126	ENSMUSG00000047126.17	ENSMUST00000103186.10	CLTC	ENSG00000141367	ENSP00000479606	1	8e-04	0.4057	100	99.5831	99.8209	ortholog_one2one	NM_001003908	Dazl.target
Cmas	ENSMUST00000032419	ENSMUSG00000030282	ENSMUSG00000030282.14	ENSMUST00000032419.8	CMAS	ENSG00000111726	ENSP00000229329	1	0.0347	0.517	100	93.318	93.75	ortholog_one2one	NM_009908	Dazl.target
Cmip	ENSMUST00000166750	ENSMUSG00000034390	ENSMUSG00000034390.16	ENSMUST00000166750.8	CMIP	ENSG00000153815	ENSP00000446100	1	0.0113	0.5892	100	97.6714	97.6714	ortholog_one2one	NM_001163262	Dazl.target
Cmpk1	ENSMUST00000030491	ENSMUSG00000028719	ENSMUSG00000028719.8	ENSMUST00000030491.8	CMPK1	ENSG00000162368	ENSP00000360939	1	0.0424	0.356	100	90.3509	90.7489	ortholog_one2one	NM_025647	Dazl.target
Cmtm6	ENSMUST00000035007	ENSMUSG00000032434	ENSMUSG00000032434.9	ENSMUST00000035007.9	CMTM6	ENSG00000091317	ENSP00000205636	1	0.1089	0.9045	100	83.0601	83.0601	ortholog_one2one	NM_026036	Dazl.target
Cnep1r1	ENSMUST00000095214	ENSMUSG00000036810	ENSMUSG00000036810.16	ENSMUST00000095214.9	CNEP1R1	ENSG00000205423	ENSP00000405635	1	0	0	100	88.0282	100	ortholog_one2one	NM_029074	Dazl.target
Cnksr3	ENSMUST00000015346	ENSMUSG00000015202	ENSMUSG00000015202.13	ENSMUST00000015346.11	CNKSR3	ENSG00000153721	ENSP00000475915	1	0.0403	0.6495	50	92.0721	92.0721	ortholog_one2one	NM_172546	Dazl.target
Cnn3	ENSMUST00000029773	ENSMUSG00000053931	ENSMUSG00000053931.11	ENSMUST00000029773.12	CNN3	ENSG00000117519	ENSP00000359225	1	0.0096	0.539	100	97.8723	97.5758	ortholog_one2one	NM_028044	Dazl.target
Cnot1	ENSMUST00000211887	ENSMUSG00000036550	ENSMUSG00000036550.16	ENSMUST00000211887.1	CNOT1	ENSG00000125107	ENSP00000320949	1	0.003	0.342	100	99.0741	99.3668	ortholog_one2one	NM_178078	Dazl.target
Cnot10	ENSMUST00000070117	ENSMUSG00000056167	ENSMUSG00000056167.8	ENSMUST00000070117.7	CNOT10	ENSG00000182973	ENSP00000399862	1	0.0243	0.5693	100	88.3085	95.4301	ortholog_one2one	NM_153585	Dazl.target
Cnot11	ENSMUST00000003219	ENSMUSG00000003135	ENSMUSG00000003135.15	ENSMUST00000003219.13	CNOT11	ENSG00000158435	ENSP00000289382	1	0.0196	0.4237	100	94.902	95.8416	ortholog_one2one	NM_028043	Dazl.target
Cnot6	ENSMUST00000145353	ENSMUSG00000020362	ENSMUSG00000020362.13	ENSMUST00000145353.7	CNOT6	ENSG00000113300	ENSP00000481893	1	0.0182	0.302	100	96.2298	96.2298	ortholog_one2one	NM_001290741	Dazl.target
Cnot6l	ENSMUST00000155901	ENSMUSG00000034724	ENSMUSG00000034724.18	ENSMUST00000155901.7	CNOT6L	ENSG00000138767	ENSP00000424896	1	0.011	0.1188	75	97.8378	97.8378	ortholog_one2one	NM_001285511	Dazl.target
Cnot7	ENSMUST00000034012	ENSMUSG00000031601	ENSMUSG00000031601.16	ENSMUST00000034012.9	CNOT7	ENSG00000198791	ENSP00000355279	1	0.0016	0.3186	100	99.6491	99.6491	ortholog_one2one	NM_001361938	Dazl.target
Cnot7	ENSMUST00000132032	ENSMUSG00000031601	ENSMUSG00000031601.16	ENSMUST00000132032.7	CNOT7	ENSG00000198791	ENSP00000355279	1	0.0016	0.3186	100	99.6491	99.6491	ortholog_one2one	NM_001361938	Dazl.target
Cnot9	ENSMUST00000087215	ENSMUSG00000026174	ENSMUSG00000026174.9	ENSMUST00000087215.6	CNOT9	ENSG00000144580	ENSP00000486540	1	0.0017	0.3128	100	89.426	98.9967	ortholog_one2one	NM_021383	Dazl.target
Cntd1	ENSMUST00000103107	ENSMUSG00000078653	ENSMUSG00000078653.4	ENSMUST00000103107.4	CNTD1	ENSG00000176563	ENSP00000465204	1	0.0889	0.4048	100	85.1515	84.1317	ortholog_one2one	NM_026562	Dazl.target
Coa5	ENSMUST00000027286	ENSMUSG00000026112	ENSMUSG00000026112.7	ENSMUST00000027286.6	COA5	ENSG00000183513	ENSP00000330730	1	0.0955	0.4371	100	82.4324	82.4324	ortholog_one2one	NM_198006	Dazl.target
Cog2	ENSMUST00000034460	ENSMUSG00000031979	ENSMUSG00000031979.17	ENSMUST00000034460.10	COG2	ENSG00000135775	ENSP00000355629	1	0.0871	0.8698	100	84.2818	85.0889	ortholog_one2one	NM_029746	Dazl.target
Copa	ENSMUST00000135192	ENSMUSG00000026553	ENSMUSG00000026553.17	ENSMUST00000135192.7	COPA	ENSG00000122218	ENSP00000357048	1	0.0074	0.3988	75	97.648	98.366	ortholog_one2one	NM_009938	Dazl.target
Copb1	ENSMUST00000033012	ENSMUSG00000030754	ENSMUSG00000030754.9	ENSMUST00000033012.8	COPB1	ENSG00000129083	ENSP00000249923	1	0.0039	0.409	100	99.2655	99.2655	ortholog_one2one	NM_033370	Dazl.target
Copb2	ENSMUST00000035033	ENSMUSG00000032458	ENSMUSG00000032458.6	ENSMUST00000035033.6	COPB2	ENSG00000184432	ENSP00000329419	1	0.0076	0.3733	100	98.234	98.3425	ortholog_one2one	NM_015827	Dazl.target
Coprs	ENSMUST00000033839	ENSMUSG00000031458	ENSMUSG00000031458.8	ENSMUST00000033839.8	COPRS	ENSG00000172301	ENSP00000304327	0	0.168	0.5202	0	70.6522	75.1445	ortholog_one2one	NM_025556	Dazl.target
Cops7b	ENSMUST00000027446	ENSMUSG00000026240	ENSMUSG00000026240.12	ENSMUST00000027446.10	COPS7B	ENSG00000144524	ENSP00000386880	1	0.1598	0.5227	100	76.9784	81.0606	ortholog_one2one	NM_172974	Dazl.target
Cops8	ENSMUST00000036153	ENSMUSG00000034432	ENSMUSG00000034432.11	ENSMUST00000036153.11	COPS8	ENSG00000198612	ENSP00000346340	1	0.0233	0.3962	100	95.2153	95.2153	ortholog_one2one	NM_133805	Dazl.target
Coq10b	ENSMUST00000027125	ENSMUSG00000025981	ENSMUSG00000025981.13	ENSMUST00000027125.6	COQ10B	ENSG00000115520	ENSP00000263960	1	0.0791	0.6447	100	84.8739	83.4711	ortholog_one2one	NM_001039710	Dazl.target
Cox11	ENSMUST00000020851	ENSMUSG00000020544	ENSMUSG00000020544.14	ENSMUST00000020851.14	COX11	ENSG00000166260	ENSP00000299335	1	0.1057	0.4317	100	83.3333	83.6364	ortholog_one2one	NM_199008	Dazl.target
Cox14	ENSMUST00000023761	ENSMUSG00000023020	ENSMUSG00000023020.3	ENSMUST00000023761.3	COX14	ENSG00000178449	ENSP00000326052	1	0.097	0.4447	100	80.7018	80.7018	ortholog_one2one	NM_183256	Dazl.target
Cox15	ENSMUST00000045562	ENSMUSG00000040018	ENSMUSG00000040018.9	ENSMUST00000045562.5	COX15	ENSG00000014919	ENSP00000016171	1	0.0565	0.4135	75	90	89.3462	ortholog_one2one	NM_144874	Dazl.target
Cox7a2l	ENSMUST00000167741	ENSMUSG00000024248	ENSMUSG00000024248.14	ENSMUST00000167741.8	COX7A2L	ENSG00000115944	ENSP00000367938	1	0.0533	0.2846	100	88.5965	75.3731	ortholog_one2one	NM_001159529	Dazl.target
Cpeb3	ENSMUST00000123727	ENSMUSG00000039652	ENSMUSG00000039652.16	ENSMUST00000123727.7	CPEB3	ENSG00000107864	ENSP00000265997	1	0.0115	0.3686	100	97.1347	94.6927	ortholog_one2one	NM_001290829	Dazl.target
Cpeb4	ENSMUST00000155278	ENSMUSG00000020300	ENSMUSG00000020300.14	ENSMUST00000155278.1	CPEB4	ENSG00000113742	ENSP00000265085	1	0.0075	0.3091	100	98.2167	98.2167	ortholog_one2one	NM_001290676	Dazl.target
Cpne1	ENSMUST00000109607	ENSMUSG00000074643	ENSMUSG00000074643.12	ENSMUST00000109607.9	CPNE1	ENSG00000214078	ENSP00000317257	1	0.0445	0.5691	75	90.5904	91.6045	ortholog_one2one	NM_170590	Dazl.target
Cpox	ENSMUST00000060077	ENSMUSG00000022742	ENSMUSG00000022742.6	ENSMUST00000060077.6	CPOX	ENSG00000080819	ENSP00000497326	1	0.1038	0.5726	100	77.9736	79.9097	ortholog_one2one	NM_007757	Dazl.target
Cpsf3	ENSMUST00000067284	ENSMUSG00000054309	ENSMUSG00000054309.9	ENSMUST00000067284.9	CPSF3	ENSG00000119203	ENSP00000238112	1	0.0069	0.5826	100	98.538	98.538	ortholog_one2one	NM_018813	Dazl.target
Cpsf4	ENSMUST00000160629	ENSMUSG00000029625	ENSMUSG00000029625.16	ENSMUST00000160629.7	CPSF4	ENSG00000160917	ENSP00000292476	1	0.0036	0.4429	75	89.9628	99.1803	ortholog_one2one	NM_001291249	Dazl.target
Cpsf6	ENSMUST00000069168	ENSMUSG00000055531	ENSMUSG00000055531.12	ENSMUST00000069168.12	CPSF6	ENSG00000111605	ENSP00000266679	1	0.0017	0.3717	100	93.3673	99.4565	ortholog_one2one	NM_001013391	Dazl.target
Crabp1	ENSMUST00000034830	ENSMUSG00000032291	ENSMUSG00000032291.8	ENSMUST00000034830.8	CRABP1	ENSG00000166426	ENSP00000299529	1	0.0031	0.563	100	99.2701	99.2701	ortholog_one2one	NM_013496	Dazl.target
Creb1	ENSMUST00000049932	ENSMUSG00000025958	ENSMUSG00000025958.14	ENSMUST00000049932.11	CREB1	ENSG00000118260	ENSP00000387699	1	0.0014	0.1881	100	99.7067	99.7067	ortholog_one2one	NM_009952	Dazl.target
Crebrf	ENSMUST00000062519	ENSMUSG00000048249	ENSMUSG00000048249.14	ENSMUST00000062519.13	CREBRF	ENSG00000164463	ENSP00000296953	1	0.0276	0.466	100	93.8967	93.75	ortholog_one2one	NM_029870	Dazl.target
Creld2	ENSMUST00000024042	ENSMUSG00000023272	ENSMUSG00000023272.4	ENSMUST00000024042.4	CRELD2	ENSG00000184164	ENSP00000383938	1	0.1444	1.0626	100	65.1741	74.8571	ortholog_one2one	NM_029720	Dazl.target
Crim1	ENSMUST00000112498	ENSMUSG00000024074	ENSMUSG00000024074.8	ENSMUST00000112498.2	CRIM1	ENSG00000150938	ENSP00000280527	1	0.0553	0.4409	100	89.0927	89.0068	ortholog_one2one	NM_015800	Dazl.target
Crk	ENSMUST00000017920	ENSMUSG00000017776	ENSMUSG00000017776.15	ENSMUST00000017920.13	CRK	ENSG00000167193	ENSP00000300574	1	0.0015	0.1767	75	99.6711	99.6711	ortholog_one2one	NM_133656	Dazl.target
Crkl	ENSMUST00000006293	ENSMUSG00000006134	ENSMUSG00000006134.4	ENSMUST00000006293.4	CRKL	ENSG00000099942	ENSP00000346300	1	0.0159	0.3832	100	96.6997	96.6997	ortholog_one2one	NM_007764	Dazl.target
Crlf3	ENSMUST00000061283	ENSMUSG00000017561	ENSMUSG00000017561.16	ENSMUST00000061283.14	CRLF3	ENSG00000176390	ENSP00000318804	1	0.036	0.4956	50	92.9864	92.9864	ortholog_one2one	NM_018776	Dazl.target
Crnkl1	ENSMUST00000001818	ENSMUSG00000001767	ENSMUSG00000001767.5	ENSMUST00000001818.4	CRNKL1	ENSG00000101343	ENSP00000366557	1	0.0171	0.579	100	77.8302	95.6522	ortholog_one2one	NM_025820	Dazl.target
Crot	ENSMUST00000003720	ENSMUSG00000003623	ENSMUSG00000003623.4	ENSMUST00000003720.4	CROT	ENSG00000005469	ENSP00000413575	1	0.0817	0.5246	100	81.875	85.6209	ortholog_one2one	NM_023733	Dazl.target
Cry1	ENSMUST00000020227	ENSMUSG00000020038	ENSMUSG00000020038.10	ENSMUST00000020227.10	CRY1	ENSG00000008405	ENSP00000008527	1	0.0181	0.4837	100	96.587	93.3993	ortholog_one2one	NM_007771	Dazl.target
Cry2	ENSMUST00000090559	ENSMUSG00000068742	ENSMUSG00000068742.11	ENSMUST00000090559.11	CRY2	ENSG00000121671	ENSP00000478187	1	0.027	0.4326	100	91.2052	94.5946	ortholog_one2one	NM_009963	Dazl.target
Crybg1	ENSMUST00000020017	ENSMUSG00000019866	ENSMUSG00000019866.15	ENSMUST00000020017.13	CRYBG1	ENSG00000112297	ENSP00000358062	1	0.1289	0.5742	100	76.0302	77.469	ortholog_one2one	NM_172393	Dazl.target
Csde1	ENSMUST00000029446	ENSMUSG00000068823	ENSMUSG00000068823.10	ENSMUST00000029446.12	CSDE1	ENSG00000009307	ENSP00000481762	1	0.0068	0.2375	100	93.128	98.4962	ortholog_one2one	NM_144901	Dazl.target
Cse1l	ENSMUST00000002790	ENSMUSG00000002718	ENSMUSG00000002718.14	ENSMUST00000002790.13	CSE1L	ENSG00000124207	ENSP00000262982	1	0.0048	0.5475	100	99.0731	99.0731	ortholog_one2one	NM_023565	Dazl.target
Csk	ENSMUST00000034863	ENSMUSG00000032312	ENSMUSG00000032312.7	ENSMUST00000034863.7	CSK	ENSG00000103653	ENSP00000220003	1	0.0039	0.7	100	98.4444	98.4444	ortholog_one2one	NM_007783	Dazl.target
Csnk1d	ENSMUST00000070575	ENSMUSG00000025162	ENSMUSG00000025162.18	ENSMUST00000070575.13	CSNK1D	ENSG00000141551	ENSP00000381531	1	0.0178	0.6776	100	94.1452	96.8675	ortholog_one2one	NM_027874	Dazl.target
Csnk1g1	ENSMUST00000034949	ENSMUSG00000032384	ENSMUSG00000032384.16	ENSMUST00000034949.9	CSNK1G1	ENSG00000169118	ENSP00000475724	1	0.0361	0.2796	100	91.3684	94.5534	ortholog_one2one	NM_173185	Dazl.target
Csnk2a2	ENSMUST00000056919	ENSMUSG00000046707	ENSMUSG00000046707.9	ENSMUST00000056919.8	CSNK2A2	ENSG00000070770	ENSP00000262506	1	0.005	0.2404	100	98.8571	98.8571	ortholog_one2one	NM_009974	Dazl.target
Cst9	ENSMUST00000028935	ENSMUSG00000027445	ENSMUSG00000027445.3	ENSMUST00000028935.3	CST9L	ENSG00000101435	ENSP00000366178	0	0.4247	1.5321	0	42.8571	45.9854	ortholog_one2one	NM_009979	Dazl.target
Cstf2	ENSMUST00000033609	ENSMUSG00000031256	ENSMUSG00000031256.11	ENSMUST00000033609.8	CSTF2	ENSG00000101811	ENSP00000387996	1	0.033	0.3624	100	90.6198	93.2759	ortholog_one2one	NM_133196	Dazl.target
Cstf2t	ENSMUST00000066039	ENSMUSG00000053536	ENSMUSG00000053536.7	ENSMUST00000066039.7	CSTF2T	ENSG00000177613	ENSP00000332444	1	0.0409	0.4513	75	90.4221	88.1329	ortholog_one2one	NM_031249	Dazl.target
Cstf3	ENSMUST00000137961	ENSMUSG00000027176	ENSMUSG00000027176.8	ENSMUST00000137961.1	CSTF3	ENSG00000176102	ENSP00000315791	1	0.0032	0.3191	100	99.3027	99.3027	ortholog_one2one	NM_001037326	Dazl.target
Ctbp1	ENSMUST00000202868	ENSMUSG00000037373	ENSMUSG00000037373.12	ENSMUST00000202868.3	CTBP1	ENSG00000159692	ENSP00000290921	1	0.0091	0.817	75	98.1818	97.9592	ortholog_one2one	NM_001198860	Dazl.target
Ctbp2	ENSMUST00000033269	ENSMUSG00000030970	ENSMUSG00000030970.16	ENSMUST00000033269.14	CTBP2	ENSG00000175029	ENSP00000311825	1	0.0612	0.6516	100	88.0203	87.753	ortholog_one2one	NM_009980	Dazl.target
Ctdsp2	ENSMUST00000105256	ENSMUSG00000078429	ENSMUSG00000078429.9	ENSMUST00000105256.9	CTDSP2	ENSG00000175215	ENSP00000381148	1	0.0232	0.4863	100	94.4649	94.8148	ortholog_one2one	NM_001113470	Dazl.target
Ctdspl2	ENSMUST00000036647	ENSMUSG00000033411	ENSMUSG00000033411.16	ENSMUST00000036647.12	CTDSPL2	ENSG00000137770	ENSP00000260327	1	0.0118	0.2538	75	97.2103	97.4194	ortholog_one2one	NM_212450	Dazl.target
Cthrc1	ENSMUST00000067072	ENSMUSG00000054196	ENSMUSG00000054196.7	ENSMUST00000067072.4	CTHRC1	ENSG00000164932	ENSP00000330523	1	0.0286	0.502	100	93.8272	93.0612	ortholog_one2one	NM_026778	Dazl.target
Ctnna1	ENSMUST00000042345	ENSMUSG00000037815	ENSMUSG00000037815.7	ENSMUST00000042345.7	CTNNA1	ENSG00000044115	ENSP00000304669	1	0.0031	0.3889	100	99.4481	99.4481	ortholog_one2one	NM_009818	Dazl.target
Ctnnb1	ENSMUST00000007130	ENSMUSG00000006932	ENSMUSG00000006932.17	ENSMUST00000007130.14	CTNNB1	ENSG00000168036	ENSP00000495360	1	6e-04	0.4515	100	99.872	99.872	ortholog_one2one	NM_007614	Dazl.target
Ctnnbip1	ENSMUST00000030839	ENSMUSG00000028988	ENSMUSG00000028988.13	ENSMUST00000030839.12	CTNNBIP1	ENSG00000178585	ENSP00000366474	1	0.0099	0.4601	100	97.5309	97.5309	ortholog_one2one	NM_023465	Dazl.target
Ctns	ENSMUST00000108476	ENSMUSG00000005949	ENSMUSG00000005949.9	ENSMUST00000108476.7	CTNS	ENSG00000040531	ENSP00000371294	1	0.1051	0.7453	100	76	82.8338	ortholog_one2one	NM_001357891	Dazl.target
Cttnbp2nl	ENSMUST00000077548	ENSMUSG00000062127	ENSMUSG00000062127.11	ENSMUST00000077548.11	CTTNBP2NL	ENSG00000143079	ENSP00000271277	1	0.0533	0.4623	100	89.6714	89.8119	ortholog_one2one	NM_030249	Dazl.target
Cul3	ENSMUST00000163119	ENSMUSG00000004364	ENSMUSG00000004364.14	ENSMUST00000163119.7	CUL3	ENSG00000036257	ENSP00000264414	1	0.0023	0.2673	100	99.4792	99.4792	ortholog_one2one	NM_016716	Dazl.target
Cul4a	ENSMUST00000016680	ENSMUSG00000031446	ENSMUSG00000031446.14	ENSMUST00000016680.13	CUL4A	ENSG00000139842	ENSP00000364589	1	0.0222	0.9218	100	94.9934	94.9934	ortholog_one2one	NM_146207	Dazl.target
Cul4b	ENSMUST00000115118	ENSMUSG00000031095	ENSMUSG00000031095.15	ENSMUST00000115118.7	CUL4B	ENSG00000158290	ENSP00000384109	1	0.0296	0.4032	100	94.9617	89.3814	ortholog_one2one	NM_028288	Dazl.target
Cwc15	ENSMUST00000004200	ENSMUSG00000004096	ENSMUSG00000004096.9	ENSMUST00000004200.8	CWC15	ENSG00000150316	ENSP00000475615	1	0.0039	0.5389	100	99.1266	99.1266	ortholog_one2one	NM_023153	Dazl.target
Cwc25	ENSMUST00000018685	ENSMUSG00000018541	ENSMUSG00000018541.10	ENSMUST00000018685.8	CWC25	ENSG00000273559	ENSP00000478070	1	0.0442	0.7836	100	88.7059	90.625	ortholog_one2one	NM_026186	Dazl.target
Cwf19l2	ENSMUST00000027027	ENSMUSG00000025898	ENSMUSG00000025898.6	ENSMUST00000027027.6	CWF19L2	ENSG00000152404	ENSP00000282251	1	0.1625	0.5661	75	72.2595	72.8298	ortholog_one2one	NM_027545	Dazl.target
Cxcr4	ENSMUST00000052172	ENSMUSG00000045382	ENSMUSG00000045382.6	ENSMUST00000052172.6	CXCR4	ENSG00000121966	ENSP00000386884	1	0.0517	0.8456	75	89.0449	88.3008	ortholog_one2one	NM_001356509	Dazl.target
Cxxc1	ENSMUST00000025444	ENSMUSG00000024560	ENSMUSG00000024560.7	ENSMUST00000025444.7	CXXC1	ENSG00000154832	ENSP00000390475	1	0.0165	0.5797	100	95.7576	95.7576	ortholog_one2one	NM_028868	Dazl.target
Cxxc5	ENSMUST00000060722	ENSMUSG00000046668	ENSMUSG00000046668.9	ENSMUST00000060722.7	CXXC5	ENSG00000171604	ENSP00000302543	1	0.0205	0.3706	100	93.4783	94.9527	ortholog_one2one	NM_133687	Dazl.target
Cyb561	ENSMUST00000019734	ENSMUSG00000019590	ENSMUSG00000019590.16	ENSMUST00000019734.10	CYB561	ENSG00000008283	ENSP00000464215	1	0.0682	0.8519	100	85.6589	88.4	ortholog_one2one	NM_007805	Dazl.target
Cyhr1	ENSMUST00000176274	ENSMUSG00000053929	ENSMUSG00000053929.17	ENSMUST00000176274.1	CYHR1	ENSG00000187954	ENSP00000433769	1	0.2147	0.9413	100	66.3366	65.0485	ortholog_one2one	NM_001276321	Dazl.target
Cyp51	ENSMUST00000001507	ENSMUSG00000001467	ENSMUSG00000001467.5	ENSMUST00000001507.4	CYP51A1	ENSG00000001630	ENSP00000003100	1	0.043	0.4479	50	90.1768	91.2525	ortholog_one2one	NM_020010	Dazl.target
D030056L22Rik	ENSMUST00000055792	ENSMUSG00000047044	ENSMUSG00000047044.7	ENSMUST00000055792.7	C9orf40	ENSG00000135045	ENSP00000366050	1	0.2572	0.5736	100	50	59.8765	ortholog_one2one	NM_177640	Dazl.target
D10Wsu102e	ENSMUST00000020488	ENSMUSG00000020255	ENSMUSG00000020255.8	ENSMUST00000020488.8	C12orf45	ENSG00000151131	ENSP00000447057	1	0.1645	0.7759	100	71.3513	71.3513	ortholog_one2one	NM_026579	Dazl.target
Dact1	ENSMUST00000150639	ENSMUSG00000044548	ENSMUSG00000044548.11	ENSMUST00000150639.1	DACT1	ENSG00000165617	ENSP00000337439	1	0.0966	0.6168	100	80.622	82.6994	ortholog_one2one	NM_001190466	Dazl.target
Dag1	ENSMUST00000171412	ENSMUSG00000039952	ENSMUSG00000039952.15	ENSMUST00000171412.6	DAG1	ENSG00000173402	ENSP00000442600	1	0.0363	0.5419	75	93.1844	93.3931	ortholog_one2one	NM_010017	Dazl.target
Dalrd3	ENSMUST00000019183	ENSMUSG00000019039	ENSMUSG00000019039.14	ENSMUST00000019183.13	DALRD3	ENSG00000178149	ENSP00000344989	1	0.1429	0.6708	100	76.6114	77.3234	ortholog_one2one	NM_026378	Dazl.target
Dap3	ENSMUST00000090938	ENSMUSG00000068921	ENSMUSG00000068921.14	ENSMUST00000090938.10	DAP3	ENSG00000132676	ENSP00000357320	1	0.102	0.5701	75	80.402	80.8081	ortholog_one2one	NM_022994	Dazl.target
Dars	ENSMUST00000027602	ENSMUSG00000026356	ENSMUSG00000026356.15	ENSMUST00000027602.14	DARS	ENSG00000115866	ENSP00000264161	1	0.0183	0.3647	100	96.008	96.008	ortholog_one2one	NM_177445	Dazl.target
Dazap1	ENSMUST00000105362	ENSMUSG00000069565	ENSMUSG00000069565.12	ENSMUST00000105362.7	DAZAP1	ENSG00000071626	ENSP00000233078	1	0.007	0.5636	100	98.2801	98.5222	ortholog_one2one	NM_133188	Dazl.target
Dazap2	ENSMUST00000000356	ENSMUSG00000000346	ENSMUSG00000000346.9	ENSMUST00000000356.9	DAZAP2	ENSG00000183283	ENSP00000448051	1	0.29	0.6318	100	51.2077	63.0952	ortholog_one2one	NM_011873	Dazl.target
Dazl	ENSMUST00000010736	ENSMUSG00000010592	ENSMUSG00000010592.9	ENSMUST00000010736.8	DAZL	ENSG00000092345	ENSP00000250863	1	0.0606	0.3064	75	82.2222	86.9128	ortholog_one2one	NM_001277863	Dazl.target
Dbf4	ENSMUST00000171808	ENSMUSG00000002297	ENSMUSG00000002297.16	ENSMUST00000171808.7	DBF4	ENSG00000006634	ENSP00000265728	1	0.215	0.5818	100	66.6172	67.7225	ortholog_one2one	NM_013726	Dazl.target
Dbn1	ENSMUST00000109923	ENSMUSG00000034675	ENSMUSG00000034675.17	ENSMUST00000109923.8	DBN1	ENSG00000113758	ENSP00000377195	1	0.0548	0.4573	100	89.6403	88.2436	ortholog_one2one	NM_019813	Dazl.target
Dcaf12	ENSMUST00000030145	ENSMUSG00000028436	ENSMUSG00000028436.8	ENSMUST00000030145.8	DCAF12	ENSG00000198876	ENSP00000355114	1	0.0073	0.3579	100	98.4547	98.4547	ortholog_one2one	NM_026893	Dazl.target
Dcaf13	ENSMUST00000022909	ENSMUSG00000022300	ENSMUSG00000022300.10	ENSMUST00000022909.9	DCAF13	ENSG00000164934	ENSP00000297579	1	0.0342	0.4763	100	69.1792	92.809	ortholog_one2one	NM_198606	Dazl.target
Dcaf7	ENSMUST00000058438	ENSMUSG00000049354	ENSMUSG00000049354.8	ENSMUST00000058438.8	DCAF7	ENSG00000136485	ENSP00000483236	1	0	0	100	100	100	ortholog_one2one	NM_027946	Dazl.target
Dck	ENSMUST00000031311	ENSMUSG00000029366	ENSMUSG00000029366.10	ENSMUST00000031311.9	DCK	ENSG00000156136	ENSP00000286648	1	0.0354	0.5463	100	92.6923	92.6923	ortholog_one2one	NM_007832	Dazl.target
Dcp1a	ENSMUST00000022535	ENSMUSG00000021962	ENSMUSG00000021962.9	ENSMUST00000022535.8	DCP1A	ENSG00000272886	ENSP00000476386	1	0.0603	0.3285	100	89.0034	86.0465	ortholog_one2one	NM_133761	Dazl.target
Dcp2	ENSMUST00000025350	ENSMUSG00000024472	ENSMUSG00000024472.9	ENSMUST00000025350.9	DCP2	ENSG00000172795	ENSP00000373715	1	0.0354	0.4348	50	92.8571	92.4171	ortholog_one2one	NM_027490	Dazl.target
Dcps	ENSMUST00000034539	ENSMUSG00000032040	ENSMUSG00000032040.15	ENSMUST00000034539.11	DCPS	ENSG00000110063	ENSP00000263579	1	0.0521	0.5826	100	88.4273	88.1657	ortholog_one2one	NM_027030	Dazl.target
Dctd	ENSMUST00000170263	ENSMUSG00000031562	ENSMUSG00000031562.15	ENSMUST00000170263.8	DCTD	ENSG00000129187	ENSP00000349576	1	0.0327	0.7276	100	88.3598	90.7609	ortholog_one2one	NM_178788	Dazl.target
Dctn4	ENSMUST00000025505	ENSMUSG00000024603	ENSMUSG00000024603.8	ENSMUST00000025505.6	DCTN4	ENSG00000132912	ENSP00000414906	1	0.0157	0.4458	75	95.0749	96.5217	ortholog_one2one	NM_026302	Dazl.target
Dctn6	ENSMUST00000118811	ENSMUSG00000031516	ENSMUSG00000031516.11	ENSMUST00000118811.7	DCTN6	ENSG00000104671	ENSP00000221114	1	0.117	0.979	100	83.6842	81.5385	ortholog_one2one	NM_001293758	Dazl.target
Dcun1d5	ENSMUST00000215683	ENSMUSG00000032002	ENSMUSG00000032002.10	ENSMUST00000215683.1	DCUN1D5	ENSG00000137692	ENSP00000260247	1	0.0152	0.2695	100	96.6245	96.6245	ortholog_one2one	NM_029775	Dazl.target
Ddb1	ENSMUST00000025649	ENSMUSG00000024740	ENSMUSG00000024740.10	ENSMUST00000025649.9	DDB1	ENSG00000167986	ENSP00000301764	1	0.002	0.4935	100	99.6491	99.6491	ortholog_one2one	NM_015735	Dazl.target
Ddhd1	ENSMUST00000087320	ENSMUSG00000037697	ENSMUSG00000037697.19	ENSMUST00000087320.12	DDHD1	ENSG00000100523	ENSP00000327104	1	0.0534	0.4593	100	88.2222	86.4924	ortholog_one2one	NM_001042719	Dazl.target
Ddit4	ENSMUST00000020308	ENSMUSG00000020108	ENSMUSG00000020108.4	ENSMUST00000020308.4	DDIT4	ENSG00000168209	ENSP00000307305	1	0.0348	0.692	100	90.9483	92.1397	ortholog_one2one	NM_029083	Dazl.target
Ddost	ENSMUST00000030538	ENSMUSG00000028757	ENSMUSG00000028757.4	ENSMUST00000030538.4	DDOST	ENSG00000244038	ENSP00000399457	1	0.0253	0.6815	100	91.886	95.0113	ortholog_one2one	NM_007838	Dazl.target
Ddr1	ENSMUST00000119825	ENSMUSG00000003534	ENSMUSG00000003534.17	ENSMUST00000119825.7	DDR1	ENSG00000204580	ENSP00000427552	1	0.0317	0.6079	100	93.0359	93.8529	ortholog_one2one	NM_001198833	Dazl.target
Ddx10	ENSMUST00000065630	ENSMUSG00000053289	ENSMUSG00000053289.8	ENSMUST00000065630.7	DDX10	ENSG00000178105	ENSP00000314348	1	0.0787	0.4578	100	84.9143	84.9143	ortholog_one2one	NM_029936	Dazl.target
Ddx17	ENSMUST00000229431	ENSMUSG00000055065	ENSMUSG00000055065.7	ENSMUST00000229431.1	DDX17	ENSG00000100201	ENSP00000380033	1	0.0057	0.4892	100	87.9617	98.6196	ortholog_one2one	NM_199079	Dazl.target
Ddx21	ENSMUST00000045866	ENSMUSG00000020075	ENSMUSG00000020075.8	ENSMUST00000045866.8	DDX21	ENSG00000165732	ENSP00000346120	1	0.0987	0.5971	100	82.6309	76.0282	ortholog_one2one	NM_019553	Dazl.target
Ddx25	ENSMUST00000034612	ENSMUSG00000032101	ENSMUSG00000032101.6	ENSMUST00000034612.6	DDX25	ENSG00000109832	ENSP00000263576	1	0.0364	0.5112	100	93.1677	92.9752	ortholog_one2one	NM_013932	Dazl.target
Ddx39b	ENSMUST00000068056	ENSMUSG00000019432	ENSMUSG00000019432.15	ENSMUST00000068056.11	DDX39B	ENSG00000198563	ENSP00000416269	1	0.0021	0.4491	50	99.5327	99.5327	ortholog_one2one	NM_019693	Dazl.target
Ddx3x	ENSMUST00000000804	ENSMUSG00000000787	ENSMUSG00000000787.12	ENSMUST00000000804.6	DDX3X	ENSG00000215301	ENSP00000494040	1	0.0069	0.3605	100	98.6405	98.6405	ortholog_one2one	NM_010028	Dazl.target
Ddx4	ENSMUST00000099166	ENSMUSG00000021758	ENSMUSG00000021758.14	ENSMUST00000099166.9	DDX4	ENSG00000152670	ENSP00000424838	1	0.0538	0.5104	100	88.8122	88.3242	ortholog_one2one	NM_001145885	Dazl.target
Ddx42	ENSMUST00000021046	ENSMUSG00000020705	ENSMUSG00000020705.6	ENSMUST00000021046.5	DDX42	ENSG00000198231	ENSP00000464050	1	0.0187	0.3935	100	95.3092	96.2325	ortholog_one2one	NM_028074	Dazl.target
Ddx5	ENSMUST00000021062	ENSMUSG00000020719	ENSMUSG00000020719.14	ENSMUST00000021062.11	DDX5	ENSG00000108654	ENSP00000225792	1	0.0036	0.2838	100	99.1857	99.0244	ortholog_one2one	NM_001355676	Dazl.target
Ddx6	ENSMUST00000170489	ENSMUSG00000032097	ENSMUSG00000032097.10	ENSMUST00000170489.1	DDX6	ENSG00000110367	ENSP00000478754	1	0.0108	0.245	100	97.7226	97.7226	ortholog_one2one	NM_001357702	Dazl.target
Dek	ENSMUST00000021807	ENSMUSG00000021377	ENSMUSG00000021377.15	ENSMUST00000021807.12	DEK	ENSG00000124795	ENSP00000498653	1	0.0521	0.5335	100	90.1333	88.9474	ortholog_one2one	NM_025900	Dazl.target
Dennd2c	ENSMUST00000172288	ENSMUSG00000007379	ENSMUSG00000007379.15	ENSMUST00000172288.2	DENND2C	ENSG00000175984	ENSP00000376955	1	0.0903	0.5156	100	83.0819	83.8043	ortholog_one2one	NM_177857	Dazl.target
Dennd5a	ENSMUST00000080437	ENSMUSG00000035901	ENSMUSG00000035901.14	ENSMUST00000080437.12	DENND5A	ENSG00000184014	ENSP00000328524	1	0.0106	0.4049	100	97.7467	97.7467	ortholog_one2one	NM_021494	Dazl.target
Dennd6a	ENSMUST00000037585	ENSMUSG00000040818	ENSMUSG00000040818.10	ENSMUST00000037585.8	DENND6A	ENSG00000174839	ENSP00000311401	1	0.023	0.3321	75	94.9013	95.3719	ortholog_one2one	NM_001134465	Dazl.target
Denr	ENSMUST00000023869	ENSMUSG00000023106	ENSMUSG00000023106.15	ENSMUST00000023869.14	DENR	ENSG00000139726	ENSP00000280557	1	0.0163	0.3947	100	95.9596	95.9596	ortholog_one2one	NM_026603	Dazl.target
Derl1	ENSMUST00000022993	ENSMUSG00000022365	ENSMUSG00000022365.6	ENSMUST00000022993.6	DERL1	ENSG00000136986	ENSP00000259512	1	0.0119	0.3044	100	97.6096	97.6096	ortholog_one2one	NM_024207	Dazl.target
Desi2	ENSMUST00000027783	ENSMUSG00000026502	ENSMUSG00000026502.13	ENSMUST00000027783.13	DESI2	ENSG00000121644	ENSP00000306528	1	0.0168	0.414	100	96.9072	96.9072	ortholog_one2one	NM_024282	Dazl.target
Dgat2	ENSMUST00000033001	ENSMUSG00000030747	ENSMUSG00000030747.5	ENSMUST00000033001.5	DGAT2	ENSG00000062282	ENSP00000228027	1	0.0255	0.5437	100	95.1031	95.1031	ortholog_one2one	NM_026384	Dazl.target
Dgkd	ENSMUST00000027517	ENSMUSG00000070738	ENSMUSG00000070738.10	ENSMUST00000027517.13	DGKD	ENSG00000077044	ENSP00000264057	1	0.029	0.6633	100	93.7397	93.2787	ortholog_one2one	NM_177646	Dazl.target
Dgke	ENSMUST00000000285	ENSMUSG00000000276	ENSMUSG00000000276.11	ENSMUST00000000285.8	DGKE	ENSG00000153933	ENSP00000284061	1	0.0464	0.4873	100	90.6526	91.1348	ortholog_one2one	NM_019505	Dazl.target
Dhcr7	ENSMUST00000073878	ENSMUSG00000058454	ENSMUSG00000058454.15	ENSMUST00000073878.11	DHCR7	ENSG00000172893	ENSP00000347717	1	NA	NA	75	88	88.7473	ortholog_one2one	NM_007856	Dazl.target
Dhdds	ENSMUST00000144668	ENSMUSG00000012117	ENSMUSG00000012117.13	ENSMUST00000144668.7	DHDDS	ENSG00000117682	ENSP00000353104	1	0.0377	0.5321	100	92.2156	92.4925	ortholog_one2one	NM_001362959	Dazl.target
Dhx15	ENSMUST00000031061	ENSMUSG00000029169	ENSMUSG00000029169.11	ENSMUST00000031061.11	DHX15	ENSG00000109606	ENSP00000336741	1	0.0017	0.3348	100	99.4969	99.4969	ortholog_one2one	NM_007839	Dazl.target
Dhx35	ENSMUST00000109478	ENSMUSG00000027655	ENSMUSG00000027655.14	ENSMUST00000109478.8	DHX35	ENSG00000101452	ENSP00000252011	1	0.0265	0.4933	100	91.6074	94.8454	ortholog_one2one	NM_001291144	Dazl.target
Dhx36	ENSMUST00000029336	ENSMUSG00000027770	ENSMUSG00000027770.5	ENSMUST00000029336.5	DHX36	ENSG00000174953	ENSP00000417078	1	0.0399	0.4663	100	91.7659	92.4076	ortholog_one2one	NM_028136	Dazl.target
Dhx9	ENSMUST00000186380	ENSMUSG00000042699	ENSMUSG00000042699.11	ENSMUST00000186380.6	DHX9	ENSG00000135829	ENSP00000356520	1	0.0413	0.4796	100	91.4173	83.9479	ortholog_one2one	NM_007842	Dazl.target
Dicer1	ENSMUST00000041987	ENSMUSG00000041415	ENSMUSG00000041415.10	ENSMUST00000041987.6	DICER1	ENSG00000100697	ENSP00000437256	1	0.0349	0.4133	100	92.3517	93.127	ortholog_one2one	NM_148948	Dazl.target
Dido1	ENSMUST00000087517	ENSMUSG00000038914	ENSMUSG00000038914.15	ENSMUST00000087517.9	DIDO1	ENSG00000101191	ENSP00000266070	1	0.158	0.8501	100	74.7321	74.2021	ortholog_one2one	NM_175551	Dazl.target
Dkc1	ENSMUST00000033776	ENSMUSG00000031403	ENSMUSG00000031403.14	ENSMUST00000033776.14	DKC1	ENSG00000130826	ENSP00000358563	1	0.0497	0.4628	75	88.9105	89.7839	ortholog_one2one	NM_001030307	Dazl.target
Dlat	ENSMUST00000034567	ENSMUSG00000000168	ENSMUSG00000000168.9	ENSMUST00000034567.3	DLAT	ENSG00000150768	ENSP00000280346	1	0.0776	0.505	100	85.4714	86.1371	ortholog_one2one	NM_145614	Dazl.target
Dlg1	ENSMUST00000064477	ENSMUSG00000022770	ENSMUSG00000022770.17	ENSMUST00000064477.13	DLG1	ENSG00000075711	ENSP00000345731	1	0.0213	0.4152	75	95.7883	95.685	ortholog_one2one	NM_007862	Dazl.target
Dlx1	ENSMUST00000037119	ENSMUSG00000041911	ENSMUSG00000041911.3	ENSMUST00000037119.3	DLX1	ENSG00000144355	ENSP00000354478	1	0.0051	0.4575	100	98.8235	98.8235	ortholog_one2one	NM_010053	Dazl.target
Dmrt1	ENSMUST00000025755	ENSMUSG00000024837	ENSMUSG00000024837.15	ENSMUST00000025755.10	DMRT1	ENSG00000137090	ENSP00000371711	1	0.0859	0.6742	100	82.3056	82.0856	ortholog_one2one	NM_015826	Dazl.target
Dmwd	ENSMUST00000032570	ENSMUSG00000030410	ENSMUSG00000030410.16	ENSMUST00000032570.13	DMWD	ENSG00000185800	ENSP00000270223	1	0.0364	0.803	100	91.543	92.782	ortholog_one2one	NM_010058	Dazl.target
Dmxl2	ENSMUST00000118163	ENSMUSG00000041268	ENSMUSG00000041268.17	ENSMUST00000118163.7	DMXL2	ENSG00000104093	ENSP00000441858	1	0.0361	0.4896	50	92.8877	92.3707	ortholog_one2one	NM_172771	Dazl.target
Dnah11	ENSMUST00000084806	ENSMUSG00000018581	ENSMUSG00000018581.15	ENSMUST00000084806.6	DNAH11	ENSG00000105877	ENSP00000475939	1	0.0861	0.5623	100	84.4774	85.0045	ortholog_one2one	NM_010060	Dazl.target
Dnaja1	ENSMUST00000164233	ENSMUSG00000028410	ENSMUSG00000028410.13	ENSMUST00000164233.7	DNAJA1	ENSG00000086061	ENSP00000369127	1	0.0022	0.4583	100	99.4962	99.4962	ortholog_one2one	NM_001164671	Dazl.target
Dnaja2	ENSMUST00000034138	ENSMUSG00000031701	ENSMUSG00000031701.6	ENSMUST00000034138.6	DNAJA2	ENSG00000069345	ENSP00000314030	1	0.0023	0.3432	100	99.5146	99.5146	ortholog_one2one	NM_019794	Dazl.target
Dnaja4	ENSMUST00000070070	ENSMUSG00000032285	ENSMUSG00000032285.15	ENSMUST00000070070.7	DNAJA4	ENSG00000140403	ENSP00000378324	1	0.0335	0.4177	100	86.6197	92.9471	ortholog_one2one	NM_021422	Dazl.target
Dnajb6	ENSMUST00000114839	ENSMUSG00000029131	ENSMUSG00000029131.14	ENSMUST00000114839.7	DNAJB6	ENSG00000105993	ENSP00000262177	1	0.0907	0.4888	50	83.7423	74.7945	ortholog_one2one	NM_011847	Dazl.target
Dnajb9	ENSMUST00000015049	ENSMUSG00000014905	ENSMUSG00000014905.4	ENSMUST00000015049.4	DNAJB9	ENSG00000128590	ENSP00000249356	1	0.0292	0.3398	75	93.722	94.1441	ortholog_one2one	NM_013760	Dazl.target
Dnajc10	ENSMUST00000028392	ENSMUSG00000027006	ENSMUSG00000027006.13	ENSMUST00000028392.7	DNAJC10	ENSG00000077232	ENSP00000264065	1	0.0495	0.5268	100	90.29	90.29	ortholog_one2one	NM_024181	Dazl.target
Dnajc12	ENSMUST00000043317	ENSMUSG00000036764	ENSMUSG00000036764.12	ENSMUST00000043317.6	DNAJC12	ENSG00000108176	ENSP00000225171	1	0.1472	0.5964	75	77.2727	77.2727	ortholog_one2one	NM_013888	Dazl.target
Dnajc7	ENSMUST00000014339	ENSMUSG00000014195	ENSMUSG00000014195.15	ENSMUST00000014339.14	DNAJC7	ENSG00000168259	ENSP00000406463	1	0.0138	0.407	100	96.3563	96.3563	ortholog_one2one	NM_019795	Dazl.target
Dnajc8	ENSMUST00000094657	ENSMUSG00000054405	ENSMUSG00000054405.14	ENSMUST00000094657.9	DNAJC8	ENSG00000126698	ENSP00000263697	1	0.0035	0.5882	100	99.2095	99.2095	ortholog_one2one	NM_172400	Dazl.target
Dnd1	ENSMUST00000061522	ENSMUSG00000044595	ENSMUSG00000044595.10	ENSMUST00000061522.7	DND1	ENSG00000256453	ENSP00000445366	1	0.0712	0.7662	100	86.119	86.3636	ortholog_one2one	NM_173383	Dazl.target
Dnmt1	ENSMUST00000177754	ENSMUSG00000004099	ENSMUSG00000004099.16	ENSMUST00000177754.8	DNMT1	ENSG00000130816	ENSP00000352516	1	0.1411	0.9602	100	76.5319	77.0988	ortholog_one2one	NM_001199432	Dazl.target
Dnmt3a	ENSMUST00000020991	ENSMUSG00000020661	ENSMUSG00000020661.15	ENSMUST00000020991.14	DNMT3A	ENSG00000119772	ENSP00000264709	1	0.0179	0.493	100	94.0789	94.4934	ortholog_one2one	NM_007872	Dazl.target
Dnttip1	ENSMUST00000017443	ENSMUSG00000017299	ENSMUSG00000017299.13	ENSMUST00000017443.13	DNTTIP1	ENSG00000101457	ENSP00000361705	1	0.017	0.5548	100	96.3526	96.6463	ortholog_one2one	NM_133763	Dazl.target
Dnttip2	ENSMUST00000035776	ENSMUSG00000039756	ENSMUSG00000039756.12	ENSMUST00000035776.9	DNTTIP2	ENSG00000067334	ENSP00000411010	1	0.2584	0.5911	100	60.8466	60.686	ortholog_one2one	NM_153806	Dazl.target
Dock1	ENSMUST00000084488	ENSMUSG00000058325	ENSMUSG00000058325.6	ENSMUST00000084488.4	DOCK1	ENSG00000150760	ENSP00000485033	1	0.0168	0.7239	100	95.1219	96.193	ortholog_one2one	NM_001033420	Dazl.target
Dock11	ENSMUST00000033419	ENSMUSG00000031093	ENSMUSG00000031093.14	ENSMUST00000033419.12	DOCK11	ENSG00000147251	ENSP00000276202	1	0.0173	0.4002	50	96.575	96.575	ortholog_one2one	NM_001009947	Dazl.target
Dock3	ENSMUST00000044532	ENSMUSG00000039716	ENSMUSG00000039716.12	ENSMUST00000044532.10	DOCK3	ENSG00000088538	ENSP00000266037	1	0.0091	0.3653	75	98.1281	98.1281	ortholog_one2one	NM_153413	Dazl.target
Dock5	ENSMUST00000039135	ENSMUSG00000044447	ENSMUSG00000044447.5	ENSMUST00000039135.5	DOCK5	ENSG00000147459	ENSP00000276440	1	0.0336	0.6683	100	93.3155	93.4154	ortholog_one2one	NM_177780	Dazl.target
Dock9	ENSMUST00000040700	ENSMUSG00000025558	ENSMUSG00000025558.19	ENSMUST00000040700.8	DOCK9	ENSG00000088387	ENSP00000365643	1	0.0262	0.6411	100	94.0039	92.0019	ortholog_one2one	NM_001081039	Dazl.target
Dot1l	ENSMUST00000105336	ENSMUSG00000061589	ENSMUSG00000061589.14	ENSMUST00000105336.8	DOT1L	ENSG00000104885	ENSP00000381657	1	0.0808	0.9206	100	84.255	84.0909	ortholog_one2one	NM_199322	Dazl.target
Dpf2	ENSMUST00000136983	ENSMUSG00000024826	ENSMUSG00000024826.15	ENSMUST00000136983.7	DPF2	ENSG00000133884	ENSP00000252268	1	0.0066	0.4889	100	98.5185	98.5185	ortholog_one2one	NM_011262	Dazl.target
Dph6	ENSMUST00000102542	ENSMUSG00000057147	ENSMUSG00000057147.13	ENSMUST00000102542.9	DPH6	ENSG00000134146	ENSP00000256538	1	0.0633	0.5546	100	87.2659	87.2659	ortholog_one2one	NM_025675	Dazl.target
Dpysl2	ENSMUST00000022629	ENSMUSG00000022048	ENSMUSG00000022048.8	ENSMUST00000022629.8	DPYSL2	ENSG00000092964	ENSP00000427985	1	0.0161	0.485	100	82.2747	97.3776	ortholog_one2one	NM_009955	Dazl.target
Dr1	ENSMUST00000031190	ENSMUSG00000029265	ENSMUSG00000029265.4	ENSMUST00000031190.4	DR1	ENSG00000117505	ENSP00000359295	1	0.0027	0.3153	50	99.4318	99.4318	ortholog_one2one	NM_026106	Dazl.target
Dsn1	ENSMUST00000103129	ENSMUSG00000027635	ENSMUSG00000027635.15	ENSMUST00000103129.8	DSN1	ENSG00000149636	ENSP00000389810	1	0.1874	0.4325	100	69.1011	70.6897	ortholog_one2one	NM_025853	Dazl.target
Dstyk	ENSMUST00000045110	ENSMUSG00000042046	ENSMUSG00000042046.15	ENSMUST00000045110.13	DSTYK	ENSG00000133059	ENSP00000356130	1	0.0454	0.412	100	91.0657	91.2621	ortholog_one2one	NM_172516	Dazl.target
Dtna	ENSMUST00000047954	ENSMUSG00000024302	ENSMUSG00000024302.16	ENSMUST00000047954.14	DTNA	ENSG00000134769	ENSP00000470152	1	0.0193	0.4505	100	90.6077	96.1877	ortholog_one2one	NM_010087	Dazl.target
Dusp14	ENSMUST00000100705	ENSMUSG00000018648	ENSMUSG00000018648.15	ENSMUST00000100705.10	DUSP14	ENSG00000276023	ENSP00000477653	1	0.0274	0.4015	100	93.9394	93.9394	ortholog_one2one	NM_019819	Dazl.target
Dusp9	ENSMUST00000019701	ENSMUSG00000031383	ENSMUSG00000031383.8	ENSMUST00000019701.8	DUSP9	ENSG00000130829	ENSP00000345853	1	0.0778	0.8199	75	84.375	71.6814	ortholog_one2one	NM_029352	Dazl.target
Dut	ENSMUST00000051605	ENSMUSG00000027203	ENSMUSG00000027203.15	ENSMUST00000051605.8	DUT	ENSG00000128951	ENSP00000370376	1	0.1596	0.9493	100	61.1111	77	ortholog_one2one	NM_023595	Dazl.target
Dvl2	ENSMUST00000019362	ENSMUSG00000020888	ENSMUSG00000020888.16	ENSMUST00000019362.14	DVL2	ENSG00000004975	ENSP00000005340	1	0.0155	0.645	100	96.6033	96.6033	ortholog_one2one	NM_007888	Dazl.target
Dvl3	ENSMUST00000003318	ENSMUSG00000003233	ENSMUSG00000003233.12	ENSMUST00000003318.12	DVL3	ENSG00000161202	ENSP00000316054	1	0.0085	0.5995	100	98.1844	97.9109	ortholog_one2one	NM_007889	Dazl.target
Dync1li2	ENSMUST00000041769	ENSMUSG00000035770	ENSMUSG00000035770.8	ENSMUST00000041769.7	DYNC1LI2	ENSG00000135720	ENSP00000258198	1	0.0146	0.3996	100	96.9512	96.9512	ortholog_one2one	NM_001013380	Dazl.target
Dynll2	ENSMUST00000020775	ENSMUSG00000020483	ENSMUSG00000020483.14	ENSMUST00000020775.8	DYNLL2	ENSG00000264364	ENSP00000477310	1	0	0	100	100	100	ortholog_one2one	NM_026556	Dazl.target
Dynlrb1	ENSMUST00000150602	ENSMUSG00000047459	ENSMUSG00000047459.14	ENSMUST00000150602.1	DYNLRB1	ENSG00000125971	ENSP00000349679	1	0.0138	0.4693	100	95.8333	88.4615	ortholog_one2one	NM_001291108	Dazl.target
Dyrk1a	ENSMUST00000119878	ENSMUSG00000022897	ENSMUSG00000022897.15	ENSMUST00000119878.7	DYRK1A	ENSG00000157540	ENSP00000340373	1	0.0036	0.2689	100	99.2136	99.2136	ortholog_one2one	NM_007890	Dazl.target
E130308A19Rik	ENSMUST00000070150	ENSMUSG00000045071	ENSMUSG00000045071.14	ENSMUST00000070150.10	KIAA1958	ENSG00000165185	ENSP00000440504	1	0.2864	0.751	100	62.9032	63.5007	ortholog_one2one	NM_001015681	Dazl.target
E2f1	ENSMUST00000103145	ENSMUSG00000027490	ENSMUSG00000027490.17	ENSMUST00000103145.10	E2F1	ENSG00000101412	ENSP00000345571	1	0.0826	0.6391	100	83.524	84.8837	ortholog_one2one	NM_007891	Dazl.target
E2f5	ENSMUST00000029069	ENSMUSG00000027552	ENSMUSG00000027552.14	ENSMUST00000029069.12	E2F5	ENSG00000133740	ENSP00000398124	1	0.0707	0.3854	100	84.104	86.8657	ortholog_one2one	NM_007892	Dazl.target
E2f6	ENSMUST00000020908	ENSMUSG00000057469	ENSMUSG00000057469.8	ENSMUST00000020908.8	E2F6	ENSG00000169016	ENSP00000370936	1	0.0687	0.739	100	84.3416	87.1324	ortholog_one2one	NM_033270	Dazl.target
Echdc1	ENSMUST00000020034	ENSMUSG00000019883	ENSMUSG00000019883.11	ENSMUST00000020034.5	ECHDC1	ENSG00000093144	ENSP00000436585	1	0.1143	0.6358	100	81.1075	77.3292	ortholog_one2one	NM_025855	Dazl.target
Ect2	ENSMUST00000108300	ENSMUSG00000027699	ENSMUSG00000027699.19	ENSMUST00000108300.7	ECT2	ENSG00000114346	ENSP00000376457	1	0.0436	0.6164	100	91.0285	91.1282	ortholog_one2one	NM_007900	Dazl.target
Edem1	ENSMUST00000089162	ENSMUSG00000030104	ENSMUSG00000030104.9	ENSMUST00000089162.4	EDEM1	ENSG00000134109	ENSP00000256497	1	0.0325	0.4897	100	92.2374	92.9448	ortholog_one2one	NM_138677	Dazl.target
Eed	ENSMUST00000238981	ENSMUSG00000030619	ENSMUSG00000030619.10	ENSMUST00000238981.1	EED	ENSG00000074266	ENSP00000338186	1	0	0	100	94.6352	100	ortholog_one2one	NM_021876	Dazl.target
Eef2k	ENSMUST00000047875	ENSMUSG00000035064	ENSMUSG00000035064.17	ENSMUST00000047875.15	EEF2K	ENSG00000103319	ENSP00000263026	1	0.0499	0.7941	100	89.931	90.0553	ortholog_one2one	NM_007908	Dazl.target
Efr3a	ENSMUST00000015146	ENSMUSG00000015002	ENSMUSG00000015002.18	ENSMUST00000015146.15	EFR3A	ENSG00000132294	ENSP00000254624	1	0.0133	0.4592	100	96.9549	97.1917	ortholog_one2one	NM_133766	Dazl.target
Eftud2	ENSMUST00000107060	ENSMUSG00000020929	ENSMUSG00000020929.14	ENSMUST00000107060.7	EFTUD2	ENSG00000108883	ENSP00000392094	1	0.0028	0.456	100	99.3827	99.3827	ortholog_one2one	NM_011431	Dazl.target
Egr1	ENSMUST00000165033	ENSMUSG00000038418	ENSMUSG00000038418.7	ENSMUST00000165033.1	EGR1	ENSG00000120738	ENSP00000239938	1	0.0325	0.7039	100	90.9761	92.6829	ortholog_one2one	NM_007913	Dazl.target
Egr2	ENSMUST00000048289	ENSMUSG00000037868	ENSMUSG00000037868.15	ENSMUST00000048289.13	EGR2	ENSG00000122877	ENSP00000242480	1	0.0558	0.4872	100	88.2353	89.3617	ortholog_one2one	NM_010118	Dazl.target
Egr4	ENSMUST00000095759	ENSMUSG00000071341	ENSMUSG00000071341.4	ENSMUST00000095759.4	EGR4	ENSG00000135625	ENSP00000445626	1	0.0692	0.7844	100	69.9491	86.1925	ortholog_one2one	NM_020596	Dazl.target
Ehd1	ENSMUST00000025684	ENSMUSG00000024772	ENSMUSG00000024772.9	ENSMUST00000025684.3	EHD1	ENSG00000110047	ENSP00000479153	1	0.0022	1.5613	100	96.8978	99.4382	ortholog_one2one	NM_010119	Dazl.target
Ehmt1	ENSMUST00000102938	ENSMUSG00000036893	ENSMUSG00000036893.17	ENSMUST00000102938.9	EHMT1	ENSG00000181090	ENSP00000417980	1	0.0582	0.7755	75	88.5208	88.6574	ortholog_one2one	NM_172545	Dazl.target
Ehmt2	ENSMUST00000013931	ENSMUSG00000013787	ENSMUSG00000013787.15	ENSMUST00000013931.11	EHMT2	ENSG00000204371	ENSP00000379078	1	0.022	0.6955	75	94.9487	95.2494	ortholog_one2one	NM_145830	Dazl.target
Ei24	ENSMUST00000238932	ENSMUSG00000062762	ENSMUSG00000062762.17	ENSMUST00000238932.1	EI24	ENSG00000149547	ENSP00000278903	1	0.0085	0.3072	100	98.2353	93.2961	ortholog_one2one	NM_001199494	Dazl.target
Eid1	ENSMUST00000164756	ENSMUSG00000091337	ENSMUSG00000091337.3	ENSMUST00000164756.3	EID1	ENSG00000255302	ENSP00000431162	1	0.1874	3.2642	100	58.8235	69.1824	ortholog_one2one	NM_025613	Dazl.target
Eid2	ENSMUST00000059596	ENSMUSG00000046058	ENSMUSG00000046058.7	ENSMUST00000059596.7	EID2	ENSG00000176396	ENSP00000375073	1	0.1453	2.2893	50	72.4576	72.4576	ortholog_one2one	NM_198425	Dazl.target
Eif1b	ENSMUST00000007139	ENSMUSG00000006941	ENSMUSG00000006941.5	ENSMUST00000007139.5	EIF1B	ENSG00000114784	ENSP00000232905	1	0	0	100	100	100	ortholog_one2one	NM_026892	Dazl.target
Eif2ak1	ENSMUST00000100487	ENSMUSG00000029613	ENSMUSG00000029613.15	ENSMUST00000100487.5	EIF2AK1	ENSG00000086232	ENSP00000199389	1	0.0975	0.5557	75	81.5873	83.0372	ortholog_one2one	NM_013557	Dazl.target
Eif2s2	ENSMUST00000099173	ENSMUSG00000074656	ENSMUSG00000074656.12	ENSMUST00000099173.10	EIF2S2	ENSG00000125977	ENSP00000364119	1	0.0184	0.2882	50	95.4955	96.0725	ortholog_one2one	NM_026030	Dazl.target
Eif3a	ENSMUST00000025955	ENSMUSG00000024991	ENSMUSG00000024991.8	ENSMUST00000025955.7	EIF3A	ENSG00000107581	ENSP00000358140	1	0.0188	0.6476	100	92.9088	95.5357	ortholog_one2one	NM_010123	Dazl.target
Eif3b	ENSMUST00000100507	ENSMUSG00000056076	ENSMUSG00000056076.13	ENSMUST00000100507.7	EIF3B	ENSG00000106263	ENSP00000354125	1	0.0684	0.9786	100	86.9779	88.1694	ortholog_one2one	NM_133916	Dazl.target
Eif3d	ENSMUST00000100484	ENSMUSG00000016554	ENSMUSG00000016554.9	ENSMUST00000100484.5	EIF3D	ENSG00000100353	ENSP00000216190	1	0.0048	0.5617	100	98.9051	98.9051	ortholog_one2one	NM_018749	Dazl.target
Eif3m	ENSMUST00000028592	ENSMUSG00000027170	ENSMUSG00000027170.12	ENSMUST00000028592.11	EIF3M	ENSG00000149100	ENSP00000436049	1	0.0025	0.4046	100	99.4652	99.4652	ortholog_one2one	NM_145380	Dazl.target
Eif4a1	ENSMUST00000163666	ENSMUSG00000059796	ENSMUSG00000059796.16	ENSMUST00000163666.2	EIF4A1	ENSG00000161960	ENSP00000293831	1	0	0	75	100	100	ortholog_one2one	NM_144958	Dazl.target
Eif4e	ENSMUST00000196990	ENSMUSG00000028156	ENSMUSG00000028156.12	ENSMUST00000196990.4	EIF4E	ENSG00000151247	ENSP00000425561	1	0.0084	0.2617	100	85.8871	98.1567	ortholog_one2one	NM_001313980	Dazl.target
Eif4ebp2	ENSMUST00000167087	ENSMUSG00000020091	ENSMUSG00000020091.15	ENSMUST00000167087.1	EIF4EBP2	ENSG00000148730	ENSP00000362314	1	0.0228	0.3678	100	95	95	ortholog_one2one	NM_010124	Dazl.target
Eif4enif1	ENSMUST00000179770	ENSMUSG00000020454	ENSMUSG00000020454.17	ENSMUST00000179770.7	EIF4ENIF1	ENSG00000184708	ENSP00000380659	1	0.0532	0.3483	75	89.8477	90.0305	ortholog_one2one	NM_001166547	Dazl.target
Eif4g2	ENSMUST00000162415	ENSMUSG00000005610	ENSMUSG00000005610.17	ENSMUST00000162415.8	EIF4G2	ENSG00000110321	ENSP00000433664	1	0.0041	0.1776	100	99.0077	99.117	ortholog_one2one	NM_013507	Dazl.target
Eif5a2	ENSMUST00000060500	ENSMUSG00000050192	ENSMUSG00000050192.8	ENSMUST00000060500.8	EIF5A2	ENSG00000163577	ENSP00000295822	1	0	0	75	100	100	ortholog_one2one	NM_177586	Dazl.target
Eif5b	ENSMUST00000027252	ENSMUSG00000026083	ENSMUSG00000026083.12	ENSMUST00000027252.7	EIF5B	ENSG00000158417	ENSP00000289371	1	0.0427	0.591	100	91.3934	91.6941	ortholog_one2one	NM_198303	Dazl.target
Elavl1	ENSMUST00000098950	ENSMUSG00000040028	ENSMUSG00000040028.10	ENSMUST00000098950.5	ELAVL1	ENSG00000066044	ENSP00000385269	1	0.0069	0.475	75	98.4663	98.4663	ortholog_one2one	NM_010485	Dazl.target
Elavl2	ENSMUST00000102799	ENSMUSG00000008489	ENSMUSG00000008489.18	ENSMUST00000102799.9	ELAVL2	ENSG00000107105	ENSP00000369453	1	0.0012	0.1736	100	99.4859	99.7423	ortholog_one2one	NM_207685	Dazl.target
Elf2	ENSMUST00000194641	ENSMUSG00000037174	ENSMUSG00000037174.18	ENSMUST00000194641.5	ELF2	ENSG00000109381	ENSP00000368868	1	0.0426	0.4098	100	91.9056	91.9056	ortholog_one2one	NM_023502	Dazl.target
Elf4	ENSMUST00000033429	ENSMUSG00000031103	ENSMUSG00000031103.12	ENSMUST00000033429.8	ELF4	ENSG00000102034	ENSP00000311280	1	0.1201	0.4522	100	78.1297	79.084	ortholog_one2one	NM_019680	Dazl.target
Elk1	ENSMUST00000009550	ENSMUSG00000009406	ENSMUSG00000009406.13	ENSMUST00000009550.13	ELK1	ENSG00000126767	ENSP00000366182	1	0.0802	0.4982	100	84.8131	84.6154	ortholog_one2one	NM_007922	Dazl.target
Ell	ENSMUST00000093454	ENSMUSG00000070002	ENSMUSG00000070002.7	ENSMUST00000093454.7	ELL	ENSG00000105656	ENSP00000262809	1	0.1038	1.2964	100	79.7101	82.2259	ortholog_one2one	NM_007924	Dazl.target
Elmod2	ENSMUST00000177594	ENSMUSG00000035151	ENSMUSG00000035151.12	ENSMUST00000177594.7	ELMOD2	ENSG00000179387	ENSP00000326342	1	0.0712	0.748	100	87.0307	87.0307	ortholog_one2one	NM_001170691	Dazl.target
Elovl1	ENSMUST00000102673	ENSMUSG00000006390	ENSMUSG00000006390.15	ENSMUST00000102673.10	ELOVL1	ENSG00000066322	ENSP00000477602	1	0.0414	0.4375	100	92.4731	92.4731	ortholog_one2one	NM_001039175	Dazl.target
Elovl5	ENSMUST00000034904	ENSMUSG00000032349	ENSMUSG00000032349.13	ENSMUST00000034904.13	ELOVL5	ENSG00000012660	ENSP00000359956	1	0.0327	0.7331	100	85.2761	92.9766	ortholog_one2one	NM_134255	Dazl.target
Emc3	ENSMUST00000032425	ENSMUSG00000030286	ENSMUSG00000030286.6	ENSMUST00000032425.6	EMC3	ENSG00000125037	ENSP00000245046	1	0.0018	0.4433	100	99.6169	99.6169	ortholog_one2one	NM_175101	Dazl.target
Emc6	ENSMUST00000108480	ENSMUSG00000047260	ENSMUSG00000047260.4	ENSMUST00000108480.1	EMC6	ENSG00000127774	ENSP00000380322	1	0	0	75	100	100	ortholog_one2one	NM_001168470	Dazl.target
Emd	ENSMUST00000002029	ENSMUSG00000001964	ENSMUSG00000001964.14	ENSMUST00000002029.12	EMD	ENSG00000102119	ENSP00000358857	1	0.1327	0.7576	100	74.4094	72.973	ortholog_one2one	NM_007927	Dazl.target
Emg1	ENSMUST00000004379	ENSMUSG00000004268	ENSMUSG00000004268.11	ENSMUST00000004379.7	EMG1	ENSG00000126749	ENSP00000470560	1	0.0652	0.5512	100	88.9344	88.9344	ortholog_one2one	NM_013536	Dazl.target
Eml4	ENSMUST00000096766	ENSMUSG00000032624	ENSMUSG00000032624.16	ENSMUST00000096766.11	EML4	ENSG00000143924	ENSP00000320663	1	0.06	0.4186	100	88.5831	87.9555	ortholog_one2one	NM_001114361	Dazl.target
Eml5	ENSMUST00000223282	ENSMUSG00000051166	ENSMUSG00000051166.10	ENSMUST00000223282.1	EML5	ENSG00000165521	ENSP00000451998	1	0.0203	0.4052	100	95.8017	95.8017	ortholog_one2one	NM_001081191	Dazl.target
Enah	ENSMUST00000193703	ENSMUSG00000022995	ENSMUSG00000022995.16	ENSMUST00000193703.5	ENAH	ENSG00000154380	ENSP00000355809	1	0.0486	0.4064	75	83.2487	61.194	ortholog_one2one	NM_001083121	Dazl.target
Enc1	ENSMUST00000041623	ENSMUSG00000041773	ENSMUSG00000041773.8	ENSMUST00000041623.8	ENC1	ENSG00000171617	ENSP00000499185	1	0.0031	0.5128	100	99.3209	99.3209	ortholog_one2one	NM_007930	Dazl.target
Enpp4	ENSMUST00000024757	ENSMUSG00000023961	ENSMUSG00000023961.16	ENSMUST00000024757.13	ENPP4	ENSG00000001561	ENSP00000318066	1	0.1056	0.5009	100	82.34	81.7982	ortholog_one2one	NM_001357997	Dazl.target
Ensa	ENSMUST00000037983	ENSMUSG00000038619	ENSMUSG00000038619.12	ENSMUST00000037983.5	ENSA	ENSG00000143420	ENSP00000341743	1	0.0075	0.146	100	86.8613	98.3471	ortholog_one2one	NM_001026212	Dazl.target
Entpd6	ENSMUST00000094467	ENSMUSG00000033068	ENSMUSG00000033068.16	ENSMUST00000094467.5	ENTPD6	ENSG00000197586	ENSP00000365840	1	0.0698	0.6477	100	82.2314	87.4725	ortholog_one2one	NM_001355068	Dazl.target
Ep300	ENSMUST00000068387	ENSMUSG00000055024	ENSMUSG00000055024.12	ENSMUST00000068387.10	EP300	ENSG00000100393	ENSP00000263253	1	0.031	0.3714	100	93.9105	93.9884	ortholog_one2one	NM_177821	Dazl.target
Ep400	ENSMUST00000041558	ENSMUSG00000029505	ENSMUSG00000029505.17	ENSMUST00000041558.14	EP400	ENSG00000183495	ENSP00000374213	1	0.0742	0.7257	100	84.1178	86.5568	ortholog_one2one	NM_029337	Dazl.target
Epas1	ENSMUST00000024954	ENSMUSG00000024140	ENSMUSG00000024140.10	ENSMUST00000024954.10	EPAS1	ENSG00000116016	ENSP00000263734	1	0.0595	0.7021	100	87.931	87.5286	ortholog_one2one	NM_010137	Dazl.target
Epb41	ENSMUST00000084253	ENSMUSG00000028906	ENSMUSG00000028906.17	ENSMUST00000084253.9	EPB41	ENSG00000159023	ENSP00000345259	1	0.0523	0.435	100	90.0463	90.676	ortholog_one2one	NM_001128606	Dazl.target
Epb41l2	ENSMUST00000218903	ENSMUSG00000019978	ENSMUSG00000019978.16	ENSMUST00000218903.1	EPB41L2	ENSG00000079819	ENSP00000357110	1	0.0991	0.3981	100	81.4925	82.8947	ortholog_one2one	NM_001358751	Dazl.target
Epb41l3	ENSMUST00000080208	ENSMUSG00000024044	ENSMUSG00000024044.19	ENSMUST00000080208.6	EPB41L3	ENSG00000082397	ENSP00000343158	1	0.0677	0.7204	100	72.6771	85.0377	ortholog_one2one	NM_013813	Dazl.target
Epb41l4b	ENSMUST00000030142	ENSMUSG00000028434	ENSMUSG00000028434.12	ENSMUST00000030142.3	EPB41L4B	ENSG00000095203	ENSP00000363694	1	0.0859	0.5105	100	52	88.8046	ortholog_one2one	NM_019427	Dazl.target
Epc2	ENSMUST00000092123	ENSMUSG00000069495	ENSMUSG00000069495.12	ENSMUST00000092123.10	EPC2	ENSG00000135999	ENSP00000258484	1	0.0151	0.1925	100	97.026	96.9059	ortholog_one2one	NM_172663	Dazl.target
Epm2aip1	ENSMUST00000060711	ENSMUSG00000046785	ENSMUSG00000046785.8	ENSMUST00000060711.7	EPM2AIP1	ENSG00000178567	ENSP00000406027	1	0.054	0.4577	100	88.9621	89.1089	ortholog_one2one	NM_175266	Dazl.target
Epn1	ENSMUST00000098845	ENSMUSG00000035203	ENSMUSG00000035203.16	ENSMUST00000098845.9	EPN1	ENSG00000063245	ENSP00000406209	1	0.025	0.5927	75	78.852	90.7826	ortholog_one2one	NM_010147	Dazl.target
Eps15	ENSMUST00000102729	ENSMUSG00000028552	ENSMUSG00000028552.13	ENSMUST00000102729.9	EPS15	ENSG00000085832	ENSP00000360798	1	0.1111	0.4116	100	82.3661	82.2742	ortholog_one2one	NM_007943	Dazl.target
Erap1	ENSMUST00000169114	ENSMUSG00000021583	ENSMUSG00000021583.7	ENSMUST00000169114.2	ERAP1	ENSG00000164307	ENSP00000296754	1	0.0794	0.4848	50	83.4388	85.0538	ortholog_one2one	NM_030711	Dazl.target
Erbb2	ENSMUST00000058295	ENSMUSG00000062312	ENSMUSG00000062312.5	ENSMUST00000058295.5	ERBB2	ENSG00000141736	ENSP00000269571	1	0.0646	0.5885	100	87.7291	87.6592	ortholog_one2one	NM_001003817	Dazl.target
Ercc6l	ENSMUST00000056904	ENSMUSG00000051220	ENSMUSG00000051220.2	ENSMUST00000056904.2	ERCC6L	ENSG00000186871	ENSP00000334675	1	0.1616	0.487	100	72.72	73.3064	ortholog_one2one	NM_146235	Dazl.target
Ercc8	ENSMUST00000054835	ENSMUSG00000021694	ENSMUSG00000021694.18	ENSMUST00000054835.14	ERCC8	ENSG00000049167	ENSP00000265038	1	0.0516	0.6084	75	89.3939	89.1688	ortholog_one2one	NM_028042	Dazl.target
Erg	ENSMUST00000233269	ENSMUSG00000040732	ENSMUSG00000040732.20	ENSMUST00000233269.1	ERG	ENSG00000157554	ENSP00000414150	1	0.0141	0.5193	100	96.7078	96.7078	ortholog_one2one	NM_001302152	Dazl.target
Erg28	ENSMUST00000021676	ENSMUSG00000021252	ENSMUSG00000021252.11	ENSMUST00000021676.11	ERG28	ENSG00000133935	ENSP00000256319	1	0.0104	0.3251	75	97.8571	97.8571	ortholog_one2one	NM_021446	Dazl.target
Ergic1	ENSMUST00000167662	ENSMUSG00000001576	ENSMUSG00000001576.15	ENSMUST00000167662.7	ERGIC1	ENSG00000113719	ENSP00000377374	1	0.0059	0.7159	100	98.9655	98.9655	ortholog_one2one	NM_026170	Dazl.target
Ergic2	ENSMUST00000136008	ENSMUSG00000030304	ENSMUSG00000030304.11	ENSMUST00000136008.7	ERGIC2	ENSG00000087502	ENSP00000353270	1	0.0214	0.3822	100	95.4907	95.4907	ortholog_one2one	NM_026168	Dazl.target
Eri2	ENSMUST00000150844	ENSMUSG00000030929	ENSMUSG00000030929.17	ENSMUST00000150844.2	ERI2	ENSG00000196678	ENSP00000350651	1	0.1578	0.5073	75	74.5297	74.8547	ortholog_one2one	NM_001355104	Dazl.target
Erlin1	ENSMUST00000170801	ENSMUSG00000025198	ENSMUSG00000025198.16	ENSMUST00000170801.7	ERLIN1	ENSG00000107566	ENSP00000410964	1	0.0252	0.3081	100	95.977	95.977	ortholog_one2one	NM_145502	Dazl.target
Ero1l	ENSMUST00000022378	ENSMUSG00000021831	ENSMUSG00000021831.9	ENSMUST00000022378.8	ERO1A	ENSG00000197930	ENSP00000379042	1	0.0367	0.5455	100	91.8803	92.6724	ortholog_one2one	NM_015774	Dazl.target
Errfi1	ENSMUST00000030811	ENSMUSG00000028967	ENSMUSG00000028967.10	ENSMUST00000030811.1	ERRFI1	ENSG00000116285	ENSP00000366702	1	0.0939	0.4338	100	82.0346	82.2126	ortholog_one2one	NM_133753	Dazl.target
Esco2	ENSMUST00000022613	ENSMUSG00000022034	ENSMUSG00000022034.10	ENSMUST00000022613.9	ESCO2	ENSG00000171320	ENSP00000306999	1	0.1721	0.4849	100	69.218	70.2703	ortholog_one2one	NM_028039	Dazl.target
Esf1	ENSMUST00000046030	ENSMUSG00000045624	ENSMUSG00000045624.15	ENSMUST00000046030.7	ESF1	ENSG00000089048	ENSP00000202816	1	0.1074	0.4945	100	80.4935	81.0651	ortholog_one2one	NM_001081090	Dazl.target
Esrp1	ENSMUST00000108313	ENSMUSG00000040728	ENSMUSG00000040728.15	ENSMUST00000108313.7	ESRP1	ENSG00000104413	ENSP00000405738	1	0.0148	0.3796	100	97.21	97.21	ortholog_one2one	NM_001347052	Dazl.target
Esyt2	ENSMUST00000100986	ENSMUSG00000021171	ENSMUSG00000021171.8	ENSMUST00000100986.3	ESYT2	ENSG00000117868	ENSP00000499020	1	0.039	0.487	100	87.57	92.5444	ortholog_one2one	NM_028731	Dazl.target
Etaa1	ENSMUST00000076661	ENSMUSG00000016984	ENSMUSG00000016984.7	ENSMUST00000076661.6	ETAA1	ENSG00000143971	ENSP00000272342	1	0.3286	0.5735	100	50.9719	53.8198	ortholog_one2one	NM_026576	Dazl.target
Etfbkmt	ENSMUST00000111551	ENSMUSG00000039958	ENSMUSG00000039958.17	ENSMUST00000111551.1	ETFBKMT	ENSG00000139160	ENSP00000350353	1	0.114	0.4042	100	77.4809	79.6078	ortholog_one2one	NM_001252095	Dazl.target
Etnk1	ENSMUST00000032413	ENSMUSG00000030275	ENSMUSG00000030275.6	ENSMUST00000032413.6	ETNK1	ENSG00000139163	ENSP00000500633	1	0.0274	0.6111	100	75.4425	93.9394	ortholog_one2one	NM_029250	Dazl.target
Ets1	ENSMUST00000034534	ENSMUSG00000032035	ENSMUSG00000032035.16	ENSMUST00000034534.12	ETS1	ENSG00000134954	ENSP00000376436	1	0.05	0.473	100	82.6804	91.1364	ortholog_one2one	NM_011808	Dazl.target
Etv3	ENSMUST00000170036	ENSMUSG00000003382	ENSMUSG00000003382.18	ENSMUST00000170036.7	ETV3	ENSG00000117036	ENSP00000357175	1	0.0754	0.4731	100	85.3516	85.1852	ortholog_one2one	NM_012051	Dazl.target
Etv6	ENSMUST00000081028	ENSMUSG00000030199	ENSMUSG00000030199.16	ENSMUST00000081028.12	ETV6	ENSG00000139083	ENSP00000379658	1	0.0454	0.3527	75	88.4956	82.4742	ortholog_one2one	NM_001303102	Dazl.target
Evi5	ENSMUST00000112642	ENSMUSG00000011831	ENSMUSG00000011831.16	ENSMUST00000112642.7	EVI5	ENSG00000067208	ENSP00000440826	1	0.0408	0.4096	100	90.3776	91.7182	ortholog_one2one	NM_007964	Dazl.target
Ewsr1	ENSMUST00000073308	ENSMUSG00000009079	ENSMUSG00000009079.16	ENSMUST00000073308.10	EWSR1	ENSG00000182944	ENSP00000400142	1	0.0106	0.2307	75	96.9743	97.8626	ortholog_one2one	NM_001283062	Dazl.target
Exd2	ENSMUST00000038185	ENSMUSG00000032705	ENSMUSG00000032705.9	ENSMUST00000038185.9	EXD2	ENSG00000081177	ENSP00000313140	1	0.0714	0.4751	100	86.3124	82.4615	ortholog_one2one	NM_133798	Dazl.target
Extl2	ENSMUST00000029575	ENSMUSG00000027963	ENSMUSG00000027963.14	ENSMUST00000029575.11	EXTL2	ENSG00000162694	ENSP00000359131	1	0.0674	0.6959	100	86.9697	86.9697	ortholog_one2one	NM_021388	Dazl.target
Ezr	ENSMUST00000064234	ENSMUSG00000052397	ENSMUSG00000052397.8	ENSMUST00000064234.6	EZR	ENSG00000092820	ENSP00000338934	1	0.0153	1.0253	100	96.4164	96.4164	ortholog_one2one	NM_009510	Dazl.target
F11r	ENSMUST00000043839	ENSMUSG00000038235	ENSMUSG00000038235.4	ENSMUST00000043839.4	F11R	ENSG00000158769	ENSP00000357005	1	0.1996	0.5775	100	68.8963	68.6667	ortholog_one2one	NM_172647	Dazl.target
Faf2	ENSMUST00000126071	ENSMUSG00000025873	ENSMUSG00000025873.16	ENSMUST00000126071.8	FAF2	ENSG00000113194	ENSP00000261942	1	0.0105	0.449	100	97.7528	97.7528	ortholog_one2one	NM_178397	Dazl.target
Faim	ENSMUST00000112911	ENSMUSG00000032463	ENSMUSG00000032463.10	ENSMUST00000112911.8	FAIM	ENSG00000158234	ENSP00000342805	0	0.1005	0.9795	25	78.8732	83.5821	ortholog_one2one	NM_001122851	Dazl.target
Fam102a	ENSMUST00000048375	ENSMUSG00000039157	ENSMUSG00000039157.12	ENSMUST00000048375.5	FAM102A	ENSG00000167106	ENSP00000362187	1	0.0208	0.8178	100	95.3125	93.3673	ortholog_one2one	NM_153560	Dazl.target
Fam107b	ENSMUST00000027965	ENSMUSG00000026655	ENSMUSG00000026655.15	ENSMUST00000027965.10	FAM107B	ENSG00000065809	ENSP00000181796	0	0.0072	0.516	100	42.1569	98.4733	ortholog_one2one	NM_025626	Dazl.target
Fam114a2	ENSMUST00000108850	ENSMUSG00000020523	ENSMUSG00000020523.14	ENSMUST00000108850.1	FAM114A2	ENSG00000055147	ENSP00000341597	1	0.1155	0.4716	100	79.0099	80.2817	ortholog_one2one	NM_001168668	Dazl.target
Fam117a	ENSMUST00000037502	ENSMUSG00000038893	ENSMUSG00000038893.12	ENSMUST00000037502.6	FAM117A	ENSG00000121104	ENSP00000240364	1	0.0651	0.3501	100	87.8587	88.2483	ortholog_one2one	NM_172543	Dazl.target
Fam117b	ENSMUST00000036540	ENSMUSG00000041040	ENSMUSG00000041040.12	ENSMUST00000036540.11	FAM117B	ENSG00000138439	ENSP00000376071	1	0.0429	0.4332	100	90.6621	91.4384	ortholog_one2one	NM_001037725	Dazl.target
Fam118a	ENSMUST00000229203	ENSMUSG00000022434	ENSMUSG00000022434.8	ENSMUST00000229203.1	FAM118A	ENSG00000100376	ENSP00000216214	1	0.0387	0.6497	100	92.437	92.437	ortholog_one2one	NM_001356616	Dazl.target
Fam118b	ENSMUST00000121564	ENSMUSG00000050471	ENSMUSG00000050471.17	ENSMUST00000121564.7	FAM118B	ENSG00000197798	ENSP00000433343	1	0.0097	0.3426	75	98.0057	98.0057	ortholog_one2one	NM_001286604	Dazl.target
Fam120a	ENSMUST00000060805	ENSMUSG00000038014	ENSMUSG00000038014.7	ENSMUST00000060805.6	FAM120A	ENSG00000048828	ENSP00000277165	1	0.0153	0.3168	100	96.4222	96.9424	ortholog_one2one	NM_001033268	Dazl.target
Fam133b	ENSMUST00000115527	ENSMUSG00000058503	ENSMUSG00000058503.11	ENSMUST00000115527.7	FAM133B	ENSG00000234545	ENSP00000398401	1	0.0659	0.7311	75	86.6397	87.3469	ortholog_one2one	NM_001042501	Dazl.target
Fam168b	ENSMUST00000047534	ENSMUSG00000037503	ENSMUSG00000037503.12	ENSMUST00000047534.11	FAM168B	ENSG00000152102	ENSP00000374565	1	0.0053	0.3074	75	98.4615	93.2039	ortholog_one2one	NM_174997	Dazl.target
Fam169a	ENSMUST00000042517	ENSMUSG00000041817	ENSMUSG00000041817.14	ENSMUST00000042517.7	FAM169A	ENSG00000198780	ENSP00000373808	1	0.105	0.4673	100	79.8507	80.4511	ortholog_one2one	NM_001100458	Dazl.target
Fam174a	ENSMUST00000059975	ENSMUSG00000051185	ENSMUSG00000051185.9	ENSMUST00000059975.7	FAM174A	ENSG00000174132	ENSP00000307954	1	0.2059	0.5953	50	68.4211	68.4211	ortholog_one2one	NM_026321	Dazl.target
Fam193a	ENSMUST00000180376	ENSMUSG00000037210	ENSMUSG00000037210.16	ENSMUST00000180376.7	FAM193A	ENSG00000125386	ENSP00000324587	1	0.0585	0.5007	100	85.8498	71.5887	ortholog_one2one	NM_001243123	Dazl.target
Fam204a	ENSMUST00000065286	ENSMUSG00000057858	ENSMUSG00000057858.8	ENSMUST00000065286.1	FAM204A	ENSG00000165669	ENSP00000358183	1	0.1186	0.4135	100	79.3991	78.3898	ortholog_one2one	NM_029648	Dazl.target
Fam20b	ENSMUST00000086153	ENSMUSG00000033557	ENSMUSG00000033557.17	ENSMUST00000086153.7	FAM20B	ENSG00000116199	ENSP00000263733	1	0.0131	0.3758	75	97.3105	97.3105	ortholog_one2one	NM_145413	Dazl.target
Fam214a	ENSMUST00000170846	ENSMUSG00000034858	ENSMUSG00000034858.16	ENSMUST00000170846.7	FAM214A	ENSG00000047346	ENSP00000443598	1	0.1523	0.7364	100	74.3306	74.3993	ortholog_one2one	NM_001113283	Dazl.target
Fam216a	ENSMUST00000031419	ENSMUSG00000029463	ENSMUSG00000029463.5	ENSMUST00000031419.5	FAM216A	ENSG00000204856	ENSP00000366901	1	0.1748	0.6354	100	63.0037	68.5259	ortholog_one2one	NM_026883	Dazl.target
Fam221a	ENSMUST00000060561	ENSMUSG00000047115	ENSMUSG00000047115.15	ENSMUST00000060561.14	FAM221A	ENSG00000188732	ENSP00000342576	1	0.0951	0.4829	100	82.5503	81.7276	ortholog_one2one	NM_172727	Dazl.target
Fam241a	ENSMUST00000199273	ENSMUSG00000050549	ENSMUSG00000050549.8	ENSMUST00000199273.1	FAM241A	ENSG00000174749	ENSP00000310182	1	0.1895	0.3088	100	71.2121	71.7557	ortholog_one2one	NM_027482	Dazl.target
Fam32a	ENSMUST00000003123	ENSMUSG00000003039	ENSMUSG00000003039.9	ENSMUST00000003123.9	FAM32A	ENSG00000105058	ENSP00000263384	1	0.0108	1.398	100	96.4286	96.4286	ortholog_one2one	NM_026455	Dazl.target
Fam45a	ENSMUST00000025957	ENSMUSG00000024993	ENSMUSG00000024993.15	ENSMUST00000025957.8	DENND10	ENSG00000119979	ENSP00000354688	1	0.0497	0.3992	100	90.1961	90.1961	ortholog_one2one	NM_001360620	Dazl.target
Fam49b	ENSMUST00000063838	ENSMUSG00000022378	ENSMUSG00000022378.14	ENSMUST00000063838.10	FAM49B	ENSG00000153310	ENSP00000429150	1	0.0014	0.2568	75	99.6914	99.6914	ortholog_one2one	NM_001360036	Dazl.target
Fam53a	ENSMUST00000065119	ENSMUSG00000037339	ENSMUSG00000037339.17	ENSMUST00000065119.14	FAM53A	ENSG00000174137	ENSP00000310057	1	0.2027	0.848	100	66.3317	65.6716	ortholog_one2one	NM_178390	Dazl.target
Fam53c	ENSMUST00000097622	ENSMUSG00000034300	ENSMUSG00000034300.17	ENSMUST00000097622.3	FAM53C	ENSG00000120709	ENSP00000239906	1	0.0288	0.1987	100	94.6429	94.402	ortholog_one2one	NM_001357456	Dazl.target
Fam76b	ENSMUST00000059579	ENSMUSG00000037808	ENSMUSG00000037808.13	ENSMUST00000059579.11	FAM76B	ENSG00000077458	ENSP00000351631	1	0.0109	0.398	100	97.6401	97.6401	ortholog_one2one	NM_176836	Dazl.target
Fam83d	ENSMUST00000029183	ENSMUSG00000027654	ENSMUSG00000027654.2	ENSMUST00000029183.2	FAM83D	ENSG00000101447	ENSP00000481465	1	0.1254	0.8267	100	77.265	77.265	ortholog_one2one	NM_027975	Dazl.target
Fam91a1	ENSMUST00000037270	ENSMUSG00000037119	ENSMUSG00000037119.4	ENSMUST00000037270.4	FAM91A1	ENSG00000176853	ENSP00000335082	1	0.0235	0.5077	100	94.9881	95.1016	ortholog_one2one	NM_145959	Dazl.target
Fam98b	ENSMUST00000028825	ENSMUSG00000027349	ENSMUSG00000027349.5	ENSMUST00000028825.4	FAM98B	ENSG00000171262	ENSP00000380734	1	0.0397	0.632	100	89.3764	90.2098	ortholog_one2one	NM_026620	Dazl.target
Fancd2	ENSMUST00000036340	ENSMUSG00000034023	ENSMUSG00000034023.16	ENSMUST00000036340.11	FANCD2	ENSG00000144554	ENSP00000287647	1	0.1643	0.5048	100	72.8756	73.931	ortholog_one2one	NM_001033244	Dazl.target
Fance	ENSMUST00000114803	ENSMUSG00000007570	ENSMUSG00000007570.16	ENSMUST00000114803.8	FANCE	ENSG00000112039	ENSP00000229769	1	0.2585	0.7383	100	61.9403	63.1179	ortholog_one2one	NM_001163819	Dazl.target
Fancg	ENSMUST00000030165	ENSMUSG00000028453	ENSMUSG00000028453.10	ENSMUST00000030165.4	FANCG	ENSG00000221829	ENSP00000367910	1	0.1825	0.4692	100	72.1865	72.0706	ortholog_one2one	NM_001163233	Dazl.target
Farsa	ENSMUST00000003906	ENSMUSG00000003808	ENSMUSG00000003808.18	ENSMUST00000003906.12	FARSA	ENSG00000179115	ENSP00000320309	1	0.0394	1.0157	100	91.9291	91.9291	ortholog_one2one	NM_025648	Dazl.target
Farsb	ENSMUST00000068333	ENSMUSG00000026245	ENSMUSG00000026245.16	ENSMUST00000068333.13	FARSB	ENSG00000116120	ENSP00000281828	1	0.036	0.5649	100	93.5484	93.5484	ortholog_one2one	NM_011811	Dazl.target
Fat1	ENSMUST00000098796	ENSMUSG00000070047	ENSMUSG00000070047.14	ENSMUST00000098796.9	FAT1	ENSG00000083857	ENSP00000406229	1	0.0631	0.8726	100	88.1648	88.1264	ortholog_one2one	NM_001081286	Dazl.target
Fbln1	ENSMUST00000109432	ENSMUSG00000006369	ENSMUSG00000006369.14	ENSMUST00000109432.3	FBLN1	ENSG00000077942	ENSP00000331544	1	0.0787	0.7612	100	84.495	84.2553	ortholog_one2one	NM_001347088	Dazl.target
Fbn2	ENSMUST00000025497	ENSMUSG00000024598	ENSMUSG00000024598.9	ENSMUST00000025497.7	FBN2	ENSG00000138829	ENSP00000424571	1	0.0174	0.6961	100	96.3255	96.4912	ortholog_one2one	NM_010181	Dazl.target
Fbxl12	ENSMUST00000086459	ENSMUSG00000066892	ENSMUSG00000066892.14	ENSMUST00000086459.5	FBXL12	ENSG00000127452	ENSP00000247977	1	NA	NA	50	93.2515	93.2515	ortholog_one2one	NM_013911	Dazl.target
Fbxl14	ENSMUST00000032094	ENSMUSG00000030019	ENSMUSG00000030019.6	ENSMUST00000032094.6	FBXL14	ENSG00000171823	ENSP00000344855	1	0.003	0.5211	75	95.2153	99.5	ortholog_one2one	NM_133940	Dazl.target
Fbxl17	ENSMUST00000024761	ENSMUSG00000023965	ENSMUSG00000023965.13	ENSMUST00000024761.12	FBXL17	ENSG00000145743	ENSP00000437464	1	0.0359	0.3364	100	92.2967	92.2967	ortholog_one2one	NM_015794	Dazl.target
Fbxl20	ENSMUST00000103143	ENSMUSG00000020883	ENSMUSG00000020883.18	ENSMUST00000103143.9	FBXL20	ENSG00000108306	ENSP00000264658	1	0.0011	0.2827	100	99.7706	99.7706	ortholog_one2one	NM_028149	Dazl.target
Fbxl22	ENSMUST00000056890	ENSMUSG00000050503	ENSMUSG00000050503.9	ENSMUST00000056890.9	FBXL22	ENSG00000197361	ENSP00000353794	0	0.4205	3.0712	100	45.3441	47.4576	ortholog_one2one	NM_175206	Dazl.target
Fbxl3	ENSMUST00000022720	ENSMUSG00000022124	ENSMUSG00000022124.15	ENSMUST00000022720.14	FBXL3	ENSG00000005812	ENSP00000347834	1	0.014	0.5163	100	97.1963	97.1963	ortholog_one2one	NM_015822	Dazl.target
Fbxl4	ENSMUST00000039234	ENSMUSG00000040410	ENSMUSG00000040410.14	ENSMUST00000039234.9	FBXL4	ENSG00000112234	ENSP00000358247	1	0.0372	0.4438	100	93.3977	93.3977	ortholog_one2one	NM_172988	Dazl.target
Fbxl5	ENSMUST00000047857	ENSMUSG00000039753	ENSMUSG00000039753.16	ENSMUST00000047857.15	FBXL5	ENSG00000118564	ENSP00000344866	1	0.0312	0.3677	100	93.1983	93.3333	ortholog_one2one	NM_001159963	Dazl.target
Fbxl6	ENSMUST00000023219	ENSMUSG00000022559	ENSMUSG00000022559.8	ENSMUST00000023219.8	FBXL6	ENSG00000182325	ENSP00000330098	1	0.1039	0.9342	75	79.7774	80.3738	ortholog_one2one	NM_013909	Dazl.target
Fbxo11	ENSMUST00000005504	ENSMUSG00000005371	ENSMUSG00000005371.15	ENSMUST00000005504.14	FBXO11	ENSG00000138081	ENSP00000384823	1	0.0024	0.3194	100	98.9212	98.6021	ortholog_one2one	NM_001081034	Dazl.target
Fbxo21	ENSMUST00000035579	ENSMUSG00000032898	ENSMUSG00000032898.9	ENSMUST00000035579.9	FBXO21	ENSG00000135108	ENSP00000328187	1	0.0211	0.8151	100	95.3822	95.5343	ortholog_one2one	NM_001346588	Dazl.target
Fbxo28	ENSMUST00000051431	ENSMUSG00000047539	ENSMUSG00000047539.9	ENSMUST00000051431.9	FBXO28	ENSG00000143756	ENSP00000355827	1	0.0262	0.4212	75	94.837	94.837	ortholog_one2one	NM_175127	Dazl.target
Fbxo30	ENSMUST00000070300	ENSMUSG00000047648	ENSMUSG00000047648.13	ENSMUST00000070300.4	FBXO30	ENSG00000118496	ENSP00000237281	1	0.0555	0.4186	100	87.9195	87.8016	ortholog_one2one	NM_001168297	Dazl.target
Fbxo32	ENSMUST00000022986	ENSMUSG00000022358	ENSMUSG00000022358.7	ENSMUST00000022986.7	FBXO32	ENSG00000156804	ENSP00000428205	1	0.0146	0.4893	100	96.6197	96.6197	ortholog_one2one	NM_026346	Dazl.target
Fbxo33	ENSMUST00000043204	ENSMUSG00000035329	ENSMUSG00000035329.7	ENSMUST00000043204.7	FBXO33	ENSG00000165355	ENSP00000298097	1	0.0362	0.3102	100	92.7928	91.637	ortholog_one2one	NM_001033156	Dazl.target
Fbxo38	ENSMUST00000048688	ENSMUSG00000042211	ENSMUSG00000042211.7	ENSMUST00000048688.7	FBXO38	ENSG00000145868	ENSP00000342023	1	0.0325	0.4233	100	93.9394	93.4673	ortholog_one2one	NM_134136	Dazl.target
Fbxo8	ENSMUST00000040218	ENSMUSG00000038206	ENSMUSG00000038206.13	ENSMUST00000040218.12	FBXO8	ENSG00000164117	ENSP00000377280	1	0.0198	0.3342	100	95.6113	95.6113	ortholog_one2one	NM_015791	Dazl.target
Fbxo9	ENSMUST00000085311	ENSMUSG00000001366	ENSMUSG00000001366.14	ENSMUST00000085311.12	FBXO9	ENSG00000112146	ENSP00000244426	1	0.0457	0.5056	75	88.8143	90.8467	ortholog_one2one	NM_023605	Dazl.target
Fbxw11	ENSMUST00000109366	ENSMUSG00000020271	ENSMUSG00000020271.17	ENSMUST00000109366.7	FBXW11	ENSG00000072803	ENSP00000265094	1	0.0017	0.373	100	99.4465	95.7371	ortholog_one2one	NM_001271349	Dazl.target
Fbxw2	ENSMUST00000131534	ENSMUSG00000035949	ENSMUSG00000035949.15	ENSMUST00000131534.7	FBXW2	ENSG00000119402	ENSP00000476369	1	0.0072	0.1553	50	98.4582	98.4582	ortholog_one2one	NM_001164772	Dazl.target
Fbxw7	ENSMUST00000107679	ENSMUSG00000028086	ENSMUSG00000028086.15	ENSMUST00000107679.7	FBXW7	ENSG00000109670	ENSP00000474725	1	0.0184	0.376	100	96.3225	95.9155	ortholog_one2one	NM_001177773	Dazl.target
Fcho2	ENSMUST00000040340	ENSMUSG00000041685	ENSMUSG00000041685.16	ENSMUST00000040340.15	FCHO2	ENSG00000157107	ENSP00000393776	1	0.0278	0.4464	100	94.0741	94.1904	ortholog_one2one	NM_172591	Dazl.target
Fchsd2	ENSMUST00000098250	ENSMUSG00000030691	ENSMUSG00000030691.15	ENSMUST00000098250.9	FCHSD2	ENSG00000137478	ENSP00000386722	1	0.0163	0.3407	100	96.4865	93.4555	ortholog_one2one	NM_001146010	Dazl.target
Fen1	ENSMUST00000142241	ENSMUSG00000024742	ENSMUSG00000024742.15	ENSMUST00000142241.1	FEN1	ENSG00000168496	ENSP00000305480	1	0.0167	0.5313	75	96.5789	96.5789	ortholog_one2one	NM_001271614	Dazl.target
Fgd5	ENSMUST00000089334	ENSMUSG00000034037	ENSMUSG00000034037.14	ENSMUST00000089334.8	FGD5	ENSG00000154783	ENSP00000285046	1	0.1904	1.0576	100	69.5622	67.173	ortholog_one2one	NM_172731	Dazl.target
Fgd6	ENSMUST00000020208	ENSMUSG00000020021	ENSMUSG00000020021.4	ENSMUST00000020208.4	FGD6	ENSG00000180263	ENSP00000344446	1	0.1552	0.599	100	73.1469	74.7677	ortholog_one2one	NM_053072	Dazl.target
Fgfr1	ENSMUST00000084027	ENSMUSG00000031565	ENSMUSG00000031565.18	ENSMUST00000084027.12	FGFR1	ENSG00000077782	ENSP00000393312	1	0.0065	0.6203	100	94.6073	98.1752	ortholog_one2one	NM_010206	Dazl.target
Fgfr1op	ENSMUST00000024636	ENSMUSG00000069135	ENSMUSG00000069135.11	ENSMUST00000024636.14	FGFR1OP	ENSG00000213066	ENSP00000355812	1	0.0837	0.4087	75	84.7118	84.7118	ortholog_one2one	NM_201230	Dazl.target
Fhl1	ENSMUST00000114769	ENSMUSG00000023092	ENSMUSG00000023092.16	ENSMUST00000114769.8	FHL1	ENSG00000022267	ENSP00000498684	1	0.0208	0.1576	100	95.356	95.356	ortholog_one2one	NM_001077361	Dazl.target
Fignl1	ENSMUST00000047689	ENSMUSG00000035455	ENSMUSG00000035455.12	ENSMUST00000047689.10	FIGNL1	ENSG00000132436	ENSP00000410811	1	0.1243	0.4875	100	78.0415	77.0132	ortholog_one2one	NM_021891	Dazl.target
Fis1	ENSMUST00000111094	ENSMUSG00000019054	ENSMUSG00000019054.13	ENSMUST00000111094.7	FIS1	ENSG00000214253	ENSP00000223136	1	0.0202	0.6698	100	96.0526	96.0526	ortholog_one2one	NM_001163243	Dazl.target
Fkbp3	ENSMUST00000021332	ENSMUSG00000020949	ENSMUSG00000020949.9	ENSMUST00000021332.9	FKBP3	ENSG00000100442	ENSP00000216330	1	0.0265	0.3132	100	94.1964	94.1964	ortholog_one2one	NM_013902	Dazl.target
Fkbp4	ENSMUST00000032508	ENSMUSG00000030357	ENSMUSG00000030357.10	ENSMUST00000032508.10	FKBP4	ENSG00000004478	ENSP00000001008	1	0.0524	0.5375	50	89.7603	89.9563	ortholog_one2one	NM_010219	Dazl.target
Fkbp6	ENSMUST00000044972	ENSMUSG00000040013	ENSMUSG00000040013.11	ENSMUST00000044972.10	FKBP6	ENSG00000077800	ENSP00000252037	1	0.1169	0.7053	100	81.9572	81.9572	ortholog_one2one	NM_033571	Dazl.target
Fkbp9	ENSMUST00000031795	ENSMUSG00000029781	ENSMUSG00000029781.7	ENSMUST00000031795.7	FKBP9	ENSG00000122642	ENSP00000439250	1	0.0343	0.5077	75	85.2327	93.1579	ortholog_one2one	NM_012056	Dazl.target
Flcn	ENSMUST00000102697	ENSMUSG00000032633	ENSMUSG00000032633.12	ENSMUST00000102697.9	FLCN	ENSG00000154803	ENSP00000285071	1	0.0361	0.761	100	92.5734	92.5734	ortholog_one2one	NM_146018	Dazl.target
Fmr1	ENSMUST00000088546	ENSMUSG00000000838	ENSMUSG00000000838.17	ENSMUST00000088546.11	FMR1	ENSG00000102081	ENSP00000359506	1	0.0136	0.1947	50	94.1456	96.9055	ortholog_one2one	NM_008031	Dazl.target
Fmr1nb	ENSMUST00000069731	ENSMUSG00000062170	ENSMUSG00000062170.12	ENSMUST00000069731.11	FMR1NB	ENSG00000176988	ENSP00000359498	0	0.586	0.9372	75	32.549	34.874	ortholog_one2one	NM_001166619	Dazl.target
Fn1	ENSMUST00000055226	ENSMUSG00000026193	ENSMUSG00000026193.15	ENSMUST00000055226.12	FN1	ENSG00000115414	ENSP00000346839	1	0.0408	0.5044	100	92.0468	92.0468	ortholog_one2one	NM_010233	Dazl.target
Fnbp1l	ENSMUST00000162409	ENSMUSG00000039735	ENSMUSG00000039735.16	ENSMUST00000162409.7	FNBP1L	ENSG00000137942	ENSP00000271234	1	0.0109	0.3487	50	97.686	97.0443	ortholog_one2one	NM_153118	Dazl.target
Fnbp4	ENSMUST00000238890	ENSMUSG00000008200	ENSMUSG00000008200.15	ENSMUST00000238890.1	FNBP4	ENSG00000109920	ENSP00000263773	1	0.0736	0.4835	100	86.0374	81.2442	ortholog_one2one	NM_018828	Dazl.target
Fndc3b	ENSMUST00000195008	ENSMUSG00000039286	ENSMUSG00000039286.12	ENSMUST00000195008.5	FNDC3B	ENSG00000075420	ENSP00000411242	1	0.0352	0.5573	100	93.1063	92.8749	ortholog_one2one	NM_001356953	Dazl.target
Fnip1	ENSMUST00000046835	ENSMUSG00000035992	ENSMUSG00000035992.15	ENSMUST00000046835.13	FNIP1	ENSG00000217128	ENSP00000421985	1	0.0424	0.3184	100	91.3379	91.4163	ortholog_one2one	NM_173753	Dazl.target
Foxf1	ENSMUST00000181504	ENSMUSG00000042812	ENSMUSG00000042812.5	ENSMUST00000181504.1	FOXF1	ENSG00000103241	ENSP00000262426	1	0.029	1.0964	100	93.1398	93.3862	ortholog_one2one	NM_010426	Dazl.target
Foxj2	ENSMUST00000003238	ENSMUSG00000003154	ENSMUSG00000003154.15	ENSMUST00000003238.13	FOXJ2	ENSG00000065970	ENSP00000162391	1	0.0429	0.433	75	89.7213	91.1504	ortholog_one2one	NM_021899	Dazl.target
Foxk1	ENSMUST00000072837	ENSMUSG00000056493	ENSMUSG00000056493.9	ENSMUST00000072837.6	FOXK1	ENSG00000164916	ENSP00000328720	1	0.0537	0.8931	100	88.131	89.847	ortholog_one2one	NM_199068	Dazl.target
Foxn2	ENSMUST00000112238	ENSMUSG00000034998	ENSMUSG00000034998.18	ENSMUST00000112238.8	FOXN2	ENSG00000170802	ENSP00000343633	1	0.0803	0.5693	100	84.4548	84.8485	ortholog_one2one	NM_180974	Dazl.target
Foxo1	ENSMUST00000053764	ENSMUSG00000044167	ENSMUSG00000044167.6	ENSMUST00000053764.6	FOXO1	ENSG00000150907	ENSP00000368880	1	0.0335	0.4532	50	92.2137	92.638	ortholog_one2one	NM_019739	Dazl.target
Frmd6	ENSMUST00000057859	ENSMUSG00000048285	ENSMUSG00000048285.9	ENSMUST00000057859.8	FRMD6	ENSG00000139926	ENSP00000343899	1	0.0342	0.747	50	93.5691	93.5691	ortholog_one2one	NM_028127	Dazl.target
Frs2	ENSMUST00000020381	ENSMUSG00000020170	ENSMUSG00000020170.4	ENSMUST00000020381.4	FRS2	ENSG00000166225	ENSP00000447241	1	0.0216	0.4369	100	95.8661	95.8661	ortholog_one2one	NM_177798	Dazl.target
Fst	ENSMUST00000223640	ENSMUSG00000021765	ENSMUSG00000021765.9	ENSMUST00000223640.2	FST	ENSG00000134363	ENSP00000256759	1	0.0117	0.4492	100	97.3837	97.6676	ortholog_one2one	NM_001301375	Dazl.target
Fto	ENSMUST00000069718	ENSMUSG00000055932	ENSMUSG00000055932.15	ENSMUST00000069718.14	FTO	ENSG00000140718	ENSP00000418823	1	0.0731	0.5514	100	85.9406	86.4542	ortholog_one2one	NM_011936	Dazl.target
Fubp1	ENSMUST00000166984	ENSMUSG00000028034	ENSMUSG00000028034.15	ENSMUST00000166984.7	FUBP1	ENSG00000162613	ENSP00000359804	1	0.0072	0.4297	100	97.8261	98.1308	ortholog_one2one	NM_001355367	Dazl.target
Fubp3	ENSMUST00000113482	ENSMUSG00000026843	ENSMUSG00000026843.15	ENSMUST00000113482.7	FUBP3	ENSG00000107164	ENSP00000318177	1	0.0363	0.4345	100	92.4825	92	ortholog_one2one	NM_001290548	Dazl.target
Fuz	ENSMUST00000071207	ENSMUSG00000011658	ENSMUSG00000011658.16	ENSMUST00000071207.13	FUZ	ENSG00000010361	ENSP00000313309	1	0.0762	0.9507	100	86.3636	86.988	ortholog_one2one	NM_027376	Dazl.target
Fxr1	ENSMUST00000197694	ENSMUSG00000027680	ENSMUSG00000027680.15	ENSMUST00000197694.4	FXR1	ENSG00000114416	ENSP00000350170	1	0.0086	0.2219	100	98.0676	89.9557	ortholog_one2one	NM_001113189	Dazl.target
Fyn	ENSMUST00000099967	ENSMUSG00000019843	ENSMUSG00000019843.14	ENSMUST00000099967.9	FYN	ENSG00000010810	ENSP00000346671	1	0.0026	0.3115	100	99.4413	99.4413	ortholog_one2one	NM_001122893	Dazl.target
Fyttd1	ENSMUST00000023489	ENSMUSG00000022800	ENSMUSG00000022800.14	ENSMUST00000023489.10	FYTTD1	ENSG00000122068	ENSP00000241502	1	0.0383	0.4641	75	92.4528	92.7445	ortholog_one2one	NM_027226	Dazl.target
Fzd3	ENSMUST00000131309	ENSMUSG00000007989	ENSMUSG00000007989.7	ENSMUST00000131309.2	FZD3	ENSG00000104290	ENSP00000240093	1	0.0091	0.3398	100	98.1982	98.1982	ortholog_one2one	NM_021458	Dazl.target
G2e3	ENSMUST00000054308	ENSMUSG00000035293	ENSMUSG00000035293.13	ENSMUST00000054308.12	G2E3	ENSG00000092140	ENSP00000206595	1	0.1163	0.4878	100	79.4618	75.9134	ortholog_one2one	NM_001015099	Dazl.target
G3bp1	ENSMUST00000018727	ENSMUSG00000018583	ENSMUSG00000018583.5	ENSMUST00000018727.3	G3BP1	ENSG00000145907	ENSP00000377681	1	0.0287	0.6575	100	93.5622	93.7634	ortholog_one2one	NM_013716	Dazl.target
G3bp2	ENSMUST00000167918	ENSMUSG00000029405	ENSMUSG00000029405.16	ENSMUST00000167918.7	G3BP2	ENSG00000138757	ENSP00000352738	1	0.0074	0.3226	100	98.3402	98.3402	ortholog_one2one	NM_001080796	Dazl.target
Gabpb2	ENSMUST00000136139	ENSMUSG00000038766	ENSMUSG00000038766.16	ENSMUST00000136139.7	GABPB2	ENSG00000143458	ENSP00000357914	1	0.0878	0.371	100	77.9018	84.2995	ortholog_one2one	NM_029885	Dazl.target
Galnt1	ENSMUST00000170243	ENSMUSG00000000420	ENSMUSG00000000420.15	ENSMUST00000170243.7	GALNT1	ENSG00000141429	ENSP00000269195	1	0.0073	0.2771	100	98.39	98.39	ortholog_one2one	NM_001160404	Dazl.target
Galnt11	ENSMUST00000045737	ENSMUSG00000038072	ENSMUSG00000038072.14	ENSMUST00000045737.13	GALNT11	ENSG00000178234	ENSP00000416787	1	0.0632	0.5513	100	87.8289	87.8289	ortholog_one2one	NM_144908	Dazl.target
Galnt12	ENSMUST00000045041	ENSMUSG00000039774	ENSMUSG00000039774.12	ENSMUST00000045041.11	GALNT12	ENSG00000119514	ENSP00000364150	1	0.0818	0.688	100	84.5095	85.2431	ortholog_one2one	NM_172693	Dazl.target
Ganab	ENSMUST00000235274	ENSMUSG00000071650	ENSMUSG00000071650.6	ENSMUST00000235274.1	GANAB	ENSG00000089597	ENSP00000340466	1	0.044	0.4682	100	91.9255	91.9255	ortholog_one2one	NM_001293621	Dazl.target
Gas2l3	ENSMUST00000220128	ENSMUSG00000074802	ENSMUSG00000074802.11	ENSMUST00000220128.1	GAS2L3	ENSG00000139354	ENSP00000448955	1	0.1412	0.64	100	75.6484	76.8668	ortholog_one2one	NM_001284344	Dazl.target
Gatad2a	ENSMUST00000116463	ENSMUSG00000036180	ENSMUSG00000036180.15	ENSMUST00000116463.3	GATAD2A	ENSG00000167491	ENSP00000384899	1	0.0631	0.7248	100	88.1703	88.7302	ortholog_one2one	NM_001113346	Dazl.target
Gclc	ENSMUST00000034905	ENSMUSG00000032350	ENSMUSG00000032350.9	ENSMUST00000034905.8	GCLC	ENSG00000001084	ENSP00000497574	1	0.0289	0.5341	100	94.1915	94.1915	ortholog_one2one	NM_010295	Dazl.target
Gclm	ENSMUST00000029769	ENSMUSG00000028124	ENSMUSG00000028124.15	ENSMUST00000029769.13	GCLM	ENSG00000023909	ENSP00000359258	1	0.0199	0.3129	100	96.3504	96.3504	ortholog_one2one	NM_008129	Dazl.target
Gcnt2	ENSMUST00000067778	ENSMUSG00000021360	ENSMUSG00000021360.16	ENSMUST00000067778.7	GCNT2	ENSG00000111846	ENSP00000419411	1	0.1352	0.7913	100	76.8657	77.0574	ortholog_one2one	NM_133219	Dazl.target
Gdi2	ENSMUST00000223396	ENSMUSG00000021218	ENSMUSG00000021218.10	ENSMUST00000223396.1	GDI2	ENSG00000057608	ENSP00000369538	1	0.0178	0.529	50	96.4045	96.4045	ortholog_one2one	NM_008112	Dazl.target
Gdpd1	ENSMUST00000020804	ENSMUSG00000061666	ENSMUSG00000061666.6	ENSMUST00000020804.7	GDPD1	ENSG00000153982	ENSP00000284116	1	0.0452	0.4803	100	92.0382	92.0382	ortholog_one2one	NM_025638	Dazl.target
Gfra1	ENSMUST00000129100	ENSMUSG00000025089	ENSMUSG00000025089.15	ENSMUST00000129100.7	GFRA1	ENSG00000151892	ENSP00000347591	1	0.0375	0.4832	100	92.4731	91.8803	ortholog_one2one	NM_001285457	Dazl.target
Gga2	ENSMUST00000033160	ENSMUSG00000030872	ENSMUSG00000030872.14	ENSMUST00000033160.14	GGA2	ENSG00000103365	ENSP00000311962	1	0.0895	0.4928	100	83.8499	85.2405	ortholog_one2one	NM_028758	Dazl.target
Ggnbp2	ENSMUST00000172405	ENSMUSG00000020530	ENSMUSG00000020530.14	ENSMUST00000172405.7	GGNBP2	ENSG00000278311	ENSP00000478220	1	0.017	0.2916	100	96.2697	96.1318	ortholog_one2one	NM_001364115	Dazl.target
Ghitm	ENSMUST00000042564	ENSMUSG00000041028	ENSMUSG00000041028.16	ENSMUST00000042564.16	GHITM	ENSG00000165678	ENSP00000361207	1	0.0418	0.3035	100	91.8841	91.6185	ortholog_one2one	NM_001199122	Dazl.target
Gid8	ENSMUST00000078687	ENSMUSG00000027573	ENSMUSG00000027573.11	ENSMUST00000078687.5	GID8	ENSG00000101193	ENSP00000266069	1	0.002	0.6255	100	99.1228	99.1228	ortholog_one2one	NM_029607	Dazl.target
Gigyf1	ENSMUST00000031727	ENSMUSG00000029714	ENSMUSG00000029714.11	ENSMUST00000031727.9	GIGYF1	ENSG00000146830	ENSP00000275732	1	0.0402	0.5677	100	90.3382	89.5594	ortholog_one2one	NM_031408	Dazl.target
Gins2	ENSMUST00000034278	ENSMUSG00000031821	ENSMUSG00000031821.11	ENSMUST00000034278.5	GINS2	ENSG00000131153	ENSP00000253462	1	0.0427	1.2383	75	90.8108	90.8108	ortholog_one2one	NM_178856	Dazl.target
Gjc1	ENSMUST00000107075	ENSMUSG00000034520	ENSMUSG00000034520.14	ENSMUST00000107075.8	GJC1	ENSG00000182963	ENSP00000467201	1	0.0153	0.3022	100	97.2222	97.2222	ortholog_one2one	NM_008122	Dazl.target
Gkap1	ENSMUST00000091579	ENSMUSG00000021552	ENSMUSG00000021552.7	ENSMUST00000091579.5	GKAP1	ENSG00000165113	ENSP00000365550	1	0.0586	0.8116	100	87.4317	87.4317	ortholog_one2one	NM_019832	Dazl.target
Glce	ENSMUST00000034785	ENSMUSG00000032252	ENSMUSG00000032252.14	ENSMUST00000034785.7	GLCE	ENSG00000138604	ENSP00000261858	1	0.0204	0.3286	100	95.7861	95.6311	ortholog_one2one	NM_033320	Dazl.target
Gle1	ENSMUST00000019859	ENSMUSG00000019715	ENSMUSG00000019715.14	ENSMUST00000019859.8	GLE1	ENSG00000119392	ENSP00000308622	1	0.0978	0.5599	100	82.9513	82.8326	ortholog_one2one	NM_028923	Dazl.target
Gli3	ENSMUST00000110510	ENSMUSG00000021318	ENSMUSG00000021318.15	ENSMUST00000110510.3	GLI3	ENSG00000106571	ENSP00000379258	1	0.0693	0.607	100	86.6456	86.4814	ortholog_one2one	NM_008130	Dazl.target
Glipr2	ENSMUST00000030202	ENSMUSG00000028480	ENSMUSG00000028480.14	ENSMUST00000030202.13	GLIPR2	ENSG00000122694	ENSP00000367196	1	0.0331	0.5882	100	93.5065	93.5065	ortholog_one2one	NM_027450	Dazl.target
Glis3	ENSMUST00000162022	ENSMUSG00000052942	ENSMUSG00000052942.13	ENSMUST00000162022.7	GLIS3	ENSG00000107249	ENSP00000371398	1	0.0849	0.484	100	84.4086	83.9572	ortholog_one2one	NM_175459	Dazl.target
Glrx5	ENSMUST00000021522	ENSMUSG00000021102	ENSMUSG00000021102.4	ENSMUST00000021522.4	GLRX5	ENSG00000182512	ENSP00000328570	1	0.0317	0.5972	75	89.8089	92.7632	ortholog_one2one	NM_028419	Dazl.target
Gls	ENSMUST00000114513	ENSMUSG00000026103	ENSMUSG00000026103.14	ENSMUST00000114513.8	GLS	ENSG00000115419	ENSP00000317379	1	0.0219	0.3795	100	95.3662	94.6588	ortholog_one2one	NM_001081081	Dazl.target
Glul	ENSMUST00000086199	ENSMUSG00000026473	ENSMUSG00000026473.16	ENSMUST00000086199.11	GLUL	ENSG00000135821	ENSP00000307900	1	0.0267	0.4769	75	94.6381	94.6381	ortholog_one2one	NM_008131	Dazl.target
Glyr1	ENSMUST00000115844	ENSMUSG00000022536	ENSMUSG00000022536.14	ENSMUST00000115844.2	GLYR1	ENSG00000140632	ENSP00000322716	1	0.0059	0.3141	100	98.3725	98.5507	ortholog_one2one	NM_001079814	Dazl.target
Gm527	ENSMUST00000058135	ENSMUSG00000047227	ENSMUSG00000047227.5	ENSMUST00000058135.5	C14orf28	ENSG00000179476	ENSP00000326846	1	0.0163	0.2381	100	96.4516	96.4516	ortholog_one2one	NM_001025605	Dazl.target
Gmeb2	ENSMUST00000049032	ENSMUSG00000038705	ENSMUSG00000038705.13	ENSMUST00000049032.12	GMEB2	ENSG00000101216	ENSP00000266068	1	0.0303	0.9565	100	93.9623	93.9623	ortholog_one2one	NM_198169	Dazl.target
Gmfb	ENSMUST00000111817	ENSMUSG00000062014	ENSMUSG00000062014.13	ENSMUST00000111817.7	GMFB	ENSG00000197045	ENSP00000350757	1	0.0096	0.4784	100	97.8873	97.8873	ortholog_one2one	NM_022023	Dazl.target
Gna11	ENSMUST00000043604	ENSMUSG00000034781	ENSMUSG00000034781.5	ENSMUST00000043604.5	GNA11	ENSG00000088256	ENSP00000078429	1	0.0089	4.6193	100	97.7716	97.7716	ortholog_one2one	NM_010301	Dazl.target
Gna13	ENSMUST00000020930	ENSMUSG00000020611	ENSMUSG00000020611.14	ENSMUST00000020930.13	GNA13	ENSG00000120063	ENSP00000400717	1	0.017	0.4358	50	96.817	96.817	ortholog_one2one	NM_010303	Dazl.target
Gnai2	ENSMUST00000055704	ENSMUSG00000032562	ENSMUSG00000032562.13	ENSMUST00000055704.11	GNAI2	ENSG00000114353	ENSP00000312999	1	0.0083	0.6606	100	98.3099	98.3099	ortholog_one2one	NM_008138	Dazl.target
Gnai3	ENSMUST00000000001	ENSMUSG00000000001	ENSMUSG00000000001.4	ENSMUST00000000001.4	GNAI3	ENSG00000065135	ENSP00000358867	1	0.0079	0.2774	100	98.3051	98.3051	ortholog_one2one	NM_010306	Dazl.target
Gnb1	ENSMUST00000165335	ENSMUSG00000029064	ENSMUSG00000029064.15	ENSMUST00000165335.7	GNB1	ENSG00000078369	ENSP00000367872	1	0	0	100	100	100	ortholog_one2one	NM_001160016	Dazl.target
Gnpda1	ENSMUST00000063814	ENSMUSG00000052102	ENSMUSG00000052102.15	ENSMUST00000063814.14	GNPDA1	ENSG00000113552	ENSP00000423674	1	0.0172	0.5171	100	96.1938	96.1938	ortholog_one2one	NM_011937	Dazl.target
Gnpnat1	ENSMUST00000046191	ENSMUSG00000037722	ENSMUSG00000037722.8	ENSMUST00000046191.8	GNPNAT1	ENSG00000100522	ENSP00000216410	1	0.0078	0.3922	100	98.3696	98.3696	ortholog_one2one	NM_019425	Dazl.target
Gnptg	ENSMUST00000038973	ENSMUSG00000035521	ENSMUSG00000035521.13	ENSMUST00000038973.6	GNPTG	ENSG00000090581	ENSP00000204679	1	0.1219	0.7716	100	78.3607	77.8502	ortholog_one2one	NM_172529	Dazl.target
Golga7	ENSMUST00000121783	ENSMUSG00000015341	ENSMUSG00000015341.17	ENSMUST00000121783.6	GOLGA7	ENSG00000147533	ENSP00000350378	1	0.0035	0.3166	100	99.2701	99.2701	ortholog_one2one	NM_020585	Dazl.target
Golph3	ENSMUST00000059680	ENSMUSG00000022200	ENSMUSG00000022200.8	ENSMUST00000059680.6	GOLPH3	ENSG00000113384	ENSP00000265070	1	0.0062	0.3146	100	98.6577	98.6577	ortholog_one2one	NM_025673	Dazl.target
Gorasp1	ENSMUST00000035099	ENSMUSG00000032513	ENSMUSG00000032513.8	ENSMUST00000035099.8	GORASP1	ENSG00000114745	ENSP00000313869	1	0.1053	0.616	100	82.7273	81.6143	ortholog_one2one	NM_028976	Dazl.target
Got2	ENSMUST00000034097	ENSMUSG00000031672	ENSMUSG00000031672.8	ENSMUST00000034097.7	GOT2	ENSG00000125166	ENSP00000245206	1	0.025	0.5176	100	94.6512	94.6512	ortholog_one2one	NM_010325	Dazl.target
Gpam	ENSMUST00000235957	ENSMUSG00000024978	ENSMUSG00000024978.11	ENSMUST00000235957.1	GPAM	ENSG00000119927	ENSP00000265276	1	0.0392	0.7574	100	92.7536	92.8658	ortholog_one2one	NM_001356285	Dazl.target
Gpatch8	ENSMUST00000143842	ENSMUSG00000034621	ENSMUSG00000034621.14	ENSMUST00000143842.1	GPATCH8	ENSG00000186566	ENSP00000467556	1	0.0481	0.3845	100	90.4128	90.2326	ortholog_one2one	NM_001159492	Dazl.target
Gpc4	ENSMUST00000033450	ENSMUSG00000031119	ENSMUSG00000031119.4	ENSMUST00000033450.2	GPC4	ENSG00000076716	ENSP00000359864	1	0.0241	0.3846	100	94.7842	94.614	ortholog_one2one	NM_008150	Dazl.target
Gpkow	ENSMUST00000049896	ENSMUSG00000031148	ENSMUSG00000031148.14	ENSMUST00000049896.12	GPKOW	ENSG00000068394	ENSP00000156109	1	0.1664	0.5506	100	73.9496	72.1311	ortholog_one2one	NM_173747	Dazl.target
Gpn3	ENSMUST00000031420	ENSMUSG00000029464	ENSMUSG00000029464.10	ENSMUST00000031420.10	GPN3	ENSG00000111231	ENSP00000442770	1	NA	NA	100	79.8762	90.8451	ortholog_one2one	NM_024216	Dazl.target
Gpt2	ENSMUST00000034136	ENSMUSG00000031700	ENSMUSG00000031700.11	ENSMUST00000034136.11	GPT2	ENSG00000166123	ENSP00000345282	1	0.0299	0.6022	100	92.7342	92.9119	ortholog_one2one	NM_173866	Dazl.target
Grb10	ENSMUST00000093321	ENSMUSG00000020176	ENSMUSG00000020176.17	ENSMUST00000093321.11	GRB10	ENSG00000106070	ENSP00000493728	1	0.0717	1.0511	100	72.943	77.349	ortholog_one2one	NM_010345	Dazl.target
Grb2	ENSMUST00000021090	ENSMUSG00000059923	ENSMUSG00000059923.13	ENSMUST00000021090.13	GRB2	ENSG00000177885	ENSP00000376345	1	0.002	0.4358	100	99.5392	99.5392	ortholog_one2one	NM_008163	Dazl.target
Grsf1	ENSMUST00000078945	ENSMUSG00000044221	ENSMUSG00000044221.14	ENSMUST00000078945.11	GRSF1	ENSG00000132463	ENSP00000254799	1	0.0486	0.4324	100	90.625	90.8142	ortholog_one2one	NM_178700	Dazl.target
Gse1	ENSMUST00000034279	ENSMUSG00000031822	ENSMUSG00000031822.20	ENSMUST00000034279.15	GSE1	ENSG00000131149	ENSP00000253458	1	0.0521	0.8785	100	88.6606	88.2257	ortholog_one2one	NM_198671	Dazl.target
Gsk3b	ENSMUST00000023507	ENSMUSG00000022812	ENSMUSG00000022812.14	ENSMUST00000023507.12	GSK3B	ENSG00000082701	ENSP00000324806	1	0.0078	0.2872	100	98.3834	98.3834	ortholog_one2one	NM_019827	Dazl.target
Gspt1	ENSMUST00000080030	ENSMUSG00000062203	ENSMUSG00000062203.15	ENSMUST00000080030.13	GSPT1	ENSG00000103342	ENSP00000398131	1	0.0287	0.3305	100	92.1507	92.2956	ortholog_one2one	NM_146066	Dazl.target
Gsr	ENSMUST00000033992	ENSMUSG00000031584	ENSMUSG00000031584.16	ENSMUST00000033992.8	GSR	ENSG00000104687	ENSP00000221130	1	0.1009	0.8848	75	79.5019	83	ortholog_one2one	NM_010344	Dazl.target
Gtf2a1	ENSMUST00000021345	ENSMUSG00000020962	ENSMUSG00000020962.14	ENSMUST00000021345.13	GTF2A1	ENSG00000165417	ENSP00000452454	1	0.0161	0.4299	100	96.8085	96.2963	ortholog_one2one	NM_031391	Dazl.target
Gtf2e1	ENSMUST00000023525	ENSMUSG00000022828	ENSMUSG00000022828.10	ENSMUST00000023525.8	GTF2E1	ENSG00000153767	ENSP00000283875	1	0.033	0.4608	100	93.3941	93.1818	ortholog_one2one	NM_001355727	Dazl.target
Gtf2e2	ENSMUST00000171010	ENSMUSG00000031585	ENSMUSG00000031585.13	ENSMUST00000171010.7	GTF2E2	ENSG00000197265	ENSP00000348168	1	0.0286	0.3915	75	93.8144	93.4931	ortholog_one2one	NM_001167922	Dazl.target
Gtf2f2	ENSMUST00000088922	ENSMUSG00000067995	ENSMUSG00000067995.4	ENSMUST00000088922.4	GTF2F2	ENSG00000188342	ENSP00000340823	1	0.0111	0.4977	75	97.992	97.992	ortholog_one2one	NM_026816	Dazl.target
Gtf2h1	ENSMUST00000006774	ENSMUSG00000006599	ENSMUSG00000006599.13	ENSMUST00000006774.10	GTF2H1	ENSG00000110768	ENSP00000265963	1	0.0146	0.3627	100	96.7153	95.8409	ortholog_one2one	NM_001360076	Dazl.target
Gtf2h3	ENSMUST00000031333	ENSMUSG00000029387	ENSMUSG00000029387.10	ENSMUST00000031333.3	GTF2H3	ENSG00000111358	ENSP00000445162	1	0.0344	0.8104	100	93.5065	93.2039	ortholog_one2one	NM_181410	Dazl.target
Gtf2i	ENSMUST00000111261	ENSMUSG00000060261	ENSMUSG00000060261.15	ENSMUST00000111261.10	GTF2I	ENSG00000263001	ENSP00000460070	1	0.0136	0.6474	100	96.8938	96.8938	ortholog_one2one	NM_001359064	Dazl.target
Gtpbp2	ENSMUST00000024748	ENSMUSG00000023952	ENSMUSG00000023952.13	ENSMUST00000024748.13	GTPBP2	ENSG00000172432	ENSP00000303997	1	0.0054	0.3259	100	98.8372	98.8372	ortholog_one2one	NM_019581	Dazl.target
Gtpbp4	ENSMUST00000222098	ENSMUSG00000021149	ENSMUSG00000021149.8	ENSMUST00000222098.1	GTPBP4	ENSG00000107937	ENSP00000354040	1	0.025	0.5693	75	94.795	94.795	ortholog_one2one	NM_027000	Dazl.target
Gucy2c	ENSMUST00000032338	ENSMUSG00000042638	ENSMUSG00000042638.14	ENSMUST00000032338.9	GUCY2C	ENSG00000070019	ENSP00000261170	1	0.1081	0.7295	100	81.8267	81.903	ortholog_one2one	NM_001127318	Dazl.target
H2afv	ENSMUST00000109737	ENSMUSG00000041126	ENSMUSG00000041126.16	ENSMUST00000109737.8	H2AFV	ENSG00000105968	ENSP00000308405	1	0	0	100	100	100	ortholog_one2one	NM_029938	Dazl.target
H2afy	ENSMUST00000016081	ENSMUSG00000015937	ENSMUSG00000015937.15	ENSMUST00000016081.12	H2AFY	ENSG00000113648	ENSP00000423563	1	0.0075	0.4651	100	98.3871	98.3871	ortholog_one2one	NM_001159513	Dazl.target
H2afy2	ENSMUST00000020283	ENSMUSG00000020086	ENSMUSG00000020086.6	ENSMUST00000020283.4	H2AFY2	ENSG00000099284	ENSP00000362352	1	0.0072	0.5706	100	98.3871	98.3871	ortholog_one2one	NM_207000	Dazl.target
H3f3a	ENSMUST00000161308	ENSMUSG00000060743	ENSMUSG00000060743.12	ENSMUST00000161308.7	H3F3A	ENSG00000163041	ENSP00000355778	1	0	0	100	100	100	ortholog_one2one	NM_008210	Dazl.target
H3f3b	ENSMUST00000016703	ENSMUSG00000016559	ENSMUSG00000016559.14	ENSMUST00000016703.7	H3F3B	ENSG00000132475	ENSP00000254810	1	0	0	100	100	100	ortholog_one2one	NM_008211	Dazl.target
Hat1	ENSMUST00000028408	ENSMUSG00000027018	ENSMUSG00000027018.11	ENSMUST00000028408.2	HAT1	ENSG00000128708	ENSP00000264108	1	0.0361	0.3086	100	92.6014	93.2692	ortholog_one2one	NM_026115	Dazl.target
Hccs	ENSMUST00000033717	ENSMUSG00000031352	ENSMUSG00000031352.10	ENSMUST00000033717.8	HCCS	ENSG00000004961	ENSP00000370139	1	0.0831	0.5267	50	84.7015	83.4559	ortholog_one2one	NM_008222	Dazl.target
Hcfc1	ENSMUST00000033761	ENSMUSG00000031386	ENSMUSG00000031386.14	ENSMUST00000033761.12	HCFC1	ENSG00000172534	ENSP00000309555	1	0.0314	0.6112	100	94.1032	93.643	ortholog_one2one	NM_008224	Dazl.target
Hdac1	ENSMUST00000102597	ENSMUSG00000028800	ENSMUSG00000028800.15	ENSMUST00000102597.4	HDAC1	ENSG00000116478	ENSP00000362649	1	0.0027	0.6099	100	99.3776	99.3776	ortholog_one2one	NM_008228	Dazl.target
Hdac2	ENSMUST00000019911	ENSMUSG00000019777	ENSMUSG00000019777.16	ENSMUST00000019911.13	HDAC2	ENSG00000196591	ENSP00000430432	1	0.0018	0.5177	100	99.5902	99.5902	ortholog_one2one	NM_008229	Dazl.target
Hdac6	ENSMUST00000033501	ENSMUSG00000031161	ENSMUSG00000031161.15	ENSMUST00000033501.14	HDAC6	ENSG00000094631	ENSP00000365804	1	0.1388	0.5061	100	74.5679	78.8512	ortholog_one2one	NM_010413	Dazl.target
Hdgf	ENSMUST00000005017	ENSMUSG00000004897	ENSMUSG00000004897.16	ENSMUST00000005017.14	HDGF	ENSG00000143321	ENSP00000357189	1	0.1499	0.5838	100	72.6562	78.481	ortholog_one2one	NM_008231	Dazl.target
Hdgfl3	ENSMUST00000107305	ENSMUSG00000025104	ENSMUSG00000025104.13	ENSMUST00000107305.7	HDGFL3	ENSG00000166503	ENSP00000299633	1	0.011	0.2309	100	97.0443	97.5247	ortholog_one2one	NM_013886	Dazl.target
Heatr1	ENSMUST00000059270	ENSMUSG00000050244	ENSMUSG00000050244.9	ENSMUST00000059270.9	HEATR1	ENSG00000119285	ENSP00000355541	1	0.0943	0.549	100	83.8153	83.8544	ortholog_one2one	NM_144835	Dazl.target
Heatr6	ENSMUST00000001002	ENSMUSG00000000976	ENSMUSG00000000976.13	ENSMUST00000001002.7	HEATR6	ENSG00000068097	ENSP00000184956	1	0.0967	0.5392	0	83.7426	83.5304	ortholog_one2one	NM_145432	Dazl.target
Heca	ENSMUST00000037879	ENSMUSG00000039879	ENSMUSG00000039879.9	ENSMUST00000037879.7	HECA	ENSG00000112406	ENSP00000356630	1	0.0204	0.7533	100	95.396	95.2206	ortholog_one2one	NM_001033432	Dazl.target
Hectd1	ENSMUST00000042052	ENSMUSG00000035247	ENSMUSG00000035247.16	ENSMUST00000042052.8	HECTD1	ENSG00000092148	ENSP00000382269	1	0.0049	0.4069	100	98.9272	98.9272	ortholog_one2one	NM_144788	Dazl.target
Hectd2	ENSMUST00000169036	ENSMUSG00000041180	ENSMUSG00000041180.13	ENSMUST00000169036.8	HECTD2	ENSG00000165338	ENSP00000401023	1	0.0532	0.3467	100	88.8462	89.4194	ortholog_one2one	NM_001163471	Dazl.target
Hells	ENSMUST00000025965	ENSMUSG00000025001	ENSMUSG00000025001.11	ENSMUST00000025965.11	HELLS	ENSG00000119969	ENSP00000377601	1	0.0404	0.4682	100	84.8416	91.352	ortholog_one2one	NM_008234	Dazl.target
Henmt1	ENSMUST00000059946	ENSMUSG00000045662	ENSMUSG00000045662.17	ENSMUST00000059946.10	HENMT1	ENSG00000162639	ENSP00000359049	1	0.199	0.6959	100	68.9567	68.6076	ortholog_one2one	NM_025723	Dazl.target
Herc1	ENSMUST00000042824	ENSMUSG00000038664	ENSMUSG00000038664.16	ENSMUST00000042824.12	HERC1	ENSG00000103657	ENSP00000390158	1	0.0132	0.3334	100	97.3462	97.3863	ortholog_one2one	NM_145617	Dazl.target
Herpud1	ENSMUST00000161576	ENSMUSG00000031770	ENSMUSG00000031770.16	ENSMUST00000161576.7	HERPUD1	ENSG00000051108	ENSP00000409555	1	0.0604	0.4557	100	88.7468	88.7468	ortholog_one2one	NM_001357205	Dazl.target
Hes1	ENSMUST00000023171	ENSMUSG00000022528	ENSMUSG00000022528.8	ENSMUST00000023171.7	HES1	ENSG00000114315	ENSP00000232424	1	0.0098	0.3975	100	97.8571	97.1631	ortholog_one2one	NM_008235	Dazl.target
Hexim1	ENSMUST00000053063	ENSMUSG00000048878	ENSMUSG00000048878.6	ENSMUST00000053063.6	HEXIM1	ENSG00000186834	ENSP00000328773	1	0.0735	0.494	100	84.9582	85.6742	ortholog_one2one	NM_138753	Dazl.target
Hey1	ENSMUST00000042412	ENSMUSG00000040289	ENSMUSG00000040289.8	ENSMUST00000042412.4	HEY1	ENSG00000164683	ENSP00000338272	1	0.0234	0.4185	100	93.1818	95.9866	ortholog_one2one	NM_010423	Dazl.target
Hif1a	ENSMUST00000021530	ENSMUSG00000021109	ENSMUSG00000021109.13	ENSMUST00000021530.7	HIF1A	ENSG00000100644	ENSP00000437955	1	0.0527	0.4407	100	86.8235	88.2775	ortholog_one2one	NM_010431	Dazl.target
Hipk3	ENSMUST00000028600	ENSMUSG00000027177	ENSMUSG00000027177.14	ENSMUST00000028600.13	HIPK3	ENSG00000110422	ENSP00000304226	1	0.0463	0.3764	100	88.9712	90.6879	ortholog_one2one	NM_010434	Dazl.target
Hira	ENSMUST00000004222	ENSMUSG00000022702	ENSMUSG00000022702.16	ENSMUST00000004222.13	HIRA	ENSG00000100084	ENSP00000263208	1	0.0201	0.4071	50	95.7719	95.9606	ortholog_one2one	NM_010435	Dazl.target
Hist1h2aa	ENSMUST00000072391	ENSMUSG00000060081	ENSMUSG00000060081.1	ENSMUST00000072391.1	HIST1H2AA	ENSG00000164508	ENSP00000297012	1	0.0794	1.523	100	86.2595	87.5969	ortholog_one2one	NM_175658	Dazl.target
Hist1h3a	ENSMUST00000091701	ENSMUSG00000069265	ENSMUSG00000069265.2	ENSMUST00000091701.2	HIST1H3A	ENSG00000275714	ENSP00000480826	1	0	0	50	100	100	ortholog_one2one	NM_013550	Dazl.target
Hist3h2a	ENSMUST00000108817	ENSMUSG00000078851	ENSMUSG00000078851.4	ENSMUST00000108817.4	HIST3H2A	ENSG00000181218	ENSP00000355656	1	0	0	50	100	100	ortholog_one2one	NM_178218	Dazl.target
Hivep2	ENSMUST00000191138	ENSMUSG00000015501	ENSMUSG00000015501.10	ENSMUST00000191138.6	HIVEP2	ENSG00000010818	ENSP00000356576	1	0.0629	0.5496	100	87.1627	87.7366	ortholog_one2one	NM_001358783	Dazl.target
Hjurp	ENSMUST00000065420	ENSMUSG00000044783	ENSMUSG00000044783.16	ENSMUST00000065420.11	HJURP	ENSG00000123485	ENSP00000414109	0	0.473	0.7646	100	39.9733	44.8276	ortholog_one2one	NM_172505	Dazl.target
Hjurp	ENSMUST00000054674	ENSMUSG00000044783	ENSMUSG00000044783.16	ENSMUST00000054674.14	HJURP	ENSG00000123485	ENSP00000414109	0	0.473	0.7646	100	39.9733	44.8276	ortholog_one2one	NM_198652	Dazl.target
Hltf	ENSMUST00000002502	ENSMUSG00000002428	ENSMUSG00000002428.12	ENSMUST00000002502.11	HLTF	ENSG00000071794	ENSP00000308944	1	0.0883	0.5197	100	83.2507	83.7488	ortholog_one2one	NM_009210	Dazl.target
Hmg20a	ENSMUST00000034879	ENSMUSG00000032329	ENSMUSG00000032329.4	ENSMUST00000034879.4	HMG20A	ENSG00000140382	ENSP00000371133	1	0.0184	0.3838	75	95.6772	95.9538	ortholog_one2one	NM_025812	Dazl.target
Hmgb2	ENSMUST00000067925	ENSMUSG00000054717	ENSMUSG00000054717.7	ENSMUST00000067925.7	HMGB2	ENSG00000164104	ENSP00000296503	1	0.0123	0.6542	100	96.6507	96.1905	ortholog_one2one	NM_001363445	Dazl.target
Hmgcr	ENSMUST00000022176	ENSMUSG00000021670	ENSMUSG00000021670.14	ENSMUST00000022176.14	HMGCR	ENSG00000113161	ENSP00000287936	1	0.0388	0.619	100	93.3559	93.4611	ortholog_one2one	NM_008255	Dazl.target
Hmgcs1	ENSMUST00000179869	ENSMUSG00000093930	ENSMUSG00000093930.2	ENSMUST00000179869.2	HMGCS1	ENSG00000112972	ENSP00000322706	1	0.0287	0.4321	100	94.6154	94.6154	ortholog_one2one	NM_001291439	Dazl.target
Hmgn1	ENSMUST00000050884	ENSMUSG00000040681	ENSMUSG00000040681.16	ENSMUST00000050884.15	HMGN1	ENSG00000205581	ENSP00000370125	1	0.0986	1.6104	100	79	82.2917	ortholog_one2one	NM_008251	Dazl.target
Hmgn5	ENSMUST00000033597	ENSMUSG00000031245	ENSMUSG00000031245.8	ENSMUST00000033597.8	HMGN5	ENSG00000198157	ENSP00000350848	0	0.3983	1.6336	100	48.9362	33.9901	ortholog_one2one	NM_016710	Dazl.target
Hmgxb4	ENSMUST00000109940	ENSMUSG00000034518	ENSMUSG00000034518.14	ENSMUST00000109940.1	HMGXB4	ENSG00000100281	ENSP00000216106	1	0.0641	0.5638	100	86.8552	87.8788	ortholog_one2one	NM_001316753	Dazl.target
Hmox1	ENSMUST00000005548	ENSMUSG00000005413	ENSMUSG00000005413.8	ENSMUST00000005548.7	HMOX1	ENSG00000100292	ENSP00000216117	1	0.1002	0.9243	100	81.9444	81.6609	ortholog_one2one	NM_010442	Dazl.target
Hnrnpa0	ENSMUST00000007980	ENSMUSG00000007836	ENSMUSG00000007836.6	ENSMUST00000007980.6	HNRNPA0	ENSG00000177733	ENSP00000316042	1	0.0403	2.1333	50	90.1639	90.1639	ortholog_one2one	NM_029872	Dazl.target
Hnrnpab	ENSMUST00000074669	ENSMUSG00000020358	ENSMUSG00000020358.17	ENSMUST00000074669.9	HNRNPAB	ENSG00000197451	ENSP00000425031	1	0.0287	0.4109	100	92.1687	92.1687	ortholog_one2one	NM_010448	Dazl.target
Hnrnpd	ENSMUST00000172361	ENSMUSG00000000568	ENSMUSG00000000568.15	ENSMUST00000172361.7	HNRNPD	ENSG00000138668	ENSP00000313199	1	0.0197	0.1688	100	96.6197	96.6197	ortholog_one2one	NM_001077265	Dazl.target
Hnrnpdl	ENSMUST00000128187	ENSMUSG00000029328	ENSMUSG00000029328.15	ENSMUST00000128187.7	HNRNPDL	ENSG00000152795	ENSP00000483254	1	0.0144	0.2545	100	96.4286	96.4286	ortholog_one2one	NM_016690	Dazl.target
Hnrnpf	ENSMUST00000167182	ENSMUSG00000042079	ENSMUSG00000042079.13	ENSMUST00000167182.7	HNRNPF	ENSG00000169813	ENSP00000400433	1	0.0088	0.4117	100	97.8313	97.8313	ortholog_one2one	NM_001166432	Dazl.target
Hnrnph1	ENSMUST00000109142	ENSMUSG00000007850	ENSMUSG00000007850.16	ENSMUST00000109142.7	HNRNPH1	ENSG00000169045	ENSP00000349168	1	0.0257	0.2055	100	96.2138	91.5254	ortholog_one2one	NM_001362523	Dazl.target
Hnrnph2	ENSMUST00000059297	ENSMUSG00000045427	ENSMUSG00000045427.13	ENSMUST00000059297.5	HNRNPH2	ENSG00000126945	ENSP00000361927	1	0.0041	0.2771	100	99.1091	99.1091	ortholog_one2one	NM_019868	Dazl.target
Hnrnpk	ENSMUST00000116403	ENSMUSG00000021546	ENSMUSG00000021546.18	ENSMUST00000116403.8	HNRNPK	ENSG00000165119	ENSP00000365458	1	0	0	100	100	100	ortholog_one2one	NM_001301341	Dazl.target
Hnrnpl	ENSMUST00000038572	ENSMUSG00000015165	ENSMUSG00000015165.16	ENSMUST00000038572.14	HNRNPL	ENSG00000104824	ENSP00000221419	1	0.0069	0.4325	100	97.9626	98.4642	ortholog_one2one	NM_177301	Dazl.target
Hnrnpll	ENSMUST00000184635	ENSMUSG00000024095	ENSMUSG00000024095.15	ENSMUST00000184635.7	HNRNPLL	ENSG00000143889	ENSP00000390625	1	0.0201	0.393	100	96.679	88.6633	ortholog_one2one	NM_144802	Dazl.target
Hnrnpm	ENSMUST00000087582	ENSMUSG00000059208	ENSMUSG00000059208.15	ENSMUST00000087582.12	HNRNPM	ENSG00000099783	ENSP00000325376	1	0.0116	0.2747	100	97.5342	97.668	ortholog_one2one	NM_001109913	Dazl.target
Hnrnpr	ENSMUST00000148843	ENSMUSG00000066037	ENSMUSG00000066037.14	ENSMUST00000148843.9	HNRNPR	ENSG00000125944	ENSP00000363745	1	0.0014	0.2703	100	99.0566	99.6835	ortholog_one2one	NM_028871	Dazl.target
Hnrnpu	ENSMUST00000037748	ENSMUSG00000039630	ENSMUSG00000039630.10	ENSMUST00000037748.8	HNRNPU	ENSG00000153187	ENSP00000491215	1	0.0149	0.3525	100	93.2121	96.125	ortholog_one2one	NM_016805	Dazl.target
Homez	ENSMUST00000142283	ENSMUSG00000057156	ENSMUSG00000057156.10	ENSMUST00000142283.3	HOMEZ	ENSG00000215271	ENSP00000350049	1	0.131	0.4817	100	73.8182	78.3784	ortholog_one2one	NM_001177705	Dazl.target
Hook1	ENSMUST00000030306	ENSMUSG00000028572	ENSMUSG00000028572.13	ENSMUST00000030306.13	HOOK1	ENSG00000134709	ENSP00000360252	1	0.0372	0.6763	100	92.033	92.033	ortholog_one2one	NM_030014	Dazl.target
Hp1bp3	ENSMUST00000165861	ENSMUSG00000028759	ENSMUSG00000028759.13	ENSMUST00000165861.7	HP1BP3	ENSG00000127483	ENSP00000312625	1	0.0557	0.4269	100	89.8734	89.7112	ortholog_one2one	NM_001122897	Dazl.target
Hprt	ENSMUST00000026723	ENSMUSG00000025630	ENSMUSG00000025630.8	ENSMUST00000026723.8	HPRT1	ENSG00000165704	ENSP00000298556	1	0.0148	0.2736	100	96.3303	96.3303	ortholog_one2one	NM_013556	Dazl.target
Hsbp1	ENSMUST00000034300	ENSMUSG00000031839	ENSMUSG00000031839.7	ENSMUST00000034300.7	HSBP1	ENSG00000230989	ENSP00000392896	1	0.0601	0.8654	100	86.8421	86.8421	ortholog_one2one	NM_024219	Dazl.target
Hsd17b4	ENSMUST00000025385	ENSMUSG00000024507	ENSMUSG00000024507.6	ENSMUST00000025385.6	HSD17B4	ENSG00000133835	ENSP00000411960	1	0.0997	0.6285	100	79.6321	82.449	ortholog_one2one	NM_008292	Dazl.target
Hsd17b7	ENSMUST00000027989	ENSMUSG00000026675	ENSMUSG00000026675.12	ENSMUST00000027989.12	HSD17B7	ENSG00000132196	ENSP00000254521	1	0.1446	0.5938	100	75.3666	76.9461	ortholog_one2one	NM_010476	Dazl.target
Hsf2	ENSMUST00000079833	ENSMUSG00000019878	ENSMUSG00000019878.8	ENSMUST00000079833.5	HSF2	ENSG00000025156	ENSP00000357440	1	0.024	0.3804	75	91.6045	94.971	ortholog_one2one	NM_008297	Dazl.target
Hsf5	ENSMUST00000093956	ENSMUSG00000070345	ENSMUSG00000070345.3	ENSMUST00000093956.3	HSF5	ENSG00000176160	ENSP00000313243	1	0.058	0.2798	100	88.9262	84.9359	ortholog_one2one	NM_001045527	Dazl.target
Hsp90aa1	ENSMUST00000094361	ENSMUSG00000021270	ENSMUSG00000021270.13	ENSMUST00000094361.10	HSP90AA1	ENSG00000080824	ENSP00000335153	1	0.0036	0.6127	100	85.0117	99.045	ortholog_one2one	NM_010480	Dazl.target
Hsp90ab1	ENSMUST00000024739	ENSMUSG00000023944	ENSMUSG00000023944.14	ENSMUST00000024739.13	HSP90AB1	ENSG00000096384	ENSP00000360609	1	0.0018	0.7489	100	99.5856	99.5856	ortholog_one2one	NM_008302	Dazl.target
Hsp90b1	ENSMUST00000020238	ENSMUSG00000020048	ENSMUSG00000020048.13	ENSMUST00000020238.13	HSP90B1	ENSG00000166598	ENSP00000299767	1	0.0137	0.5405	25	97.0112	97.1322	ortholog_one2one	NM_011631	Dazl.target
Hspa14	ENSMUST00000027961	ENSMUSG00000109865	ENSMUSG00000109865.1	ENSMUST00000027961.11	HSPA14	ENSG00000187522	ENSP00000367623	1	0.0521	0.5975	100	90.9627	90.9627	ortholog_one2one	NM_015765	Dazl.target
Hspa4	ENSMUST00000020630	ENSMUSG00000020361	ENSMUSG00000020361.13	ENSMUST00000020630.7	HSPA4	ENSG00000170606	ENSP00000302961	1	0.02	0.4267	100	96.0714	95.8432	ortholog_one2one	NM_008300	Dazl.target
Hspa4l	ENSMUST00000204702	ENSMUSG00000025757	ENSMUSG00000025757.12	ENSMUST00000204702.2	HSPA4L	ENSG00000164070	ENSP00000296464	1	0.0403	0.5102	100	92.2527	92.3628	ortholog_one2one	NM_011020	Dazl.target
Hsph1	ENSMUST00000202361	ENSMUSG00000029657	ENSMUSG00000029657.15	ENSMUST00000202361.3	HSPH1	ENSG00000120694	ENSP00000487365	1	0.0577	0.77	100	89.5349	89.7436	ortholog_one2one	NM_013559	Dazl.target
Htatsf1	ENSMUST00000088652	ENSMUSG00000067873	ENSMUSG00000067873.11	ENSMUST00000088652.5	HTATSF1	ENSG00000102241	ENSP00000442699	1	0.1393	0.7517	100	75.3642	75.1651	ortholog_one2one	NM_028242	Dazl.target
Huwe1	ENSMUST00000026292	ENSMUSG00000025261	ENSMUSG00000025261.17	ENSMUST00000026292.14	HUWE1	ENSG00000086758	ENSP00000340648	1	0.0112	0.3068	100	97.8052	97.7159	ortholog_one2one	NM_021523	Dazl.target
Hyou1	ENSMUST00000066601	ENSMUSG00000032115	ENSMUSG00000032115.14	ENSMUST00000066601.12	HYOU1	ENSG00000149428	ENSP00000480150	1	0.0393	0.5437	100	91.992	91.992	ortholog_one2one	NM_021395	Dazl.target
Iah1	ENSMUST00000076813	ENSMUSG00000062054	ENSMUSG00000062054.7	ENSMUST00000076813.7	IAH1	ENSG00000134330	ENSP00000417580	1	0.0972	0.5307	100	83.871	83.5341	ortholog_one2one	NM_026347	Dazl.target
Ibtk	ENSMUST00000039213	ENSMUSG00000035941	ENSMUSG00000035941.15	ENSMUST00000039213.14	IBTK	ENSG00000005700	ENSP00000305721	1	0.073	0.5671	100	85.8093	85.8728	ortholog_one2one	NM_001081282	Dazl.target
Ice2	ENSMUST00000034761	ENSMUSG00000032235	ENSMUSG00000032235.15	ENSMUST00000034761.14	ICE2	ENSG00000128915	ENSP00000261520	1	0.1503	0.5812	100	73.7271	73.2794	ortholog_one2one	NM_145618	Dazl.target
Icmt	ENSMUST00000048892	ENSMUSG00000039662	ENSMUSG00000039662.16	ENSMUST00000048892.13	ICMT	ENSG00000116237	ENSP00000343552	1	0.022	0.5065	100	96.1268	96.1268	ortholog_one2one	NM_133788	Dazl.target
Id4	ENSMUST00000021810	ENSMUSG00000021379	ENSMUSG00000021379.2	ENSMUST00000021810.2	ID4	ENSG00000172201	ENSP00000367972	1	0.0077	0.533	50	98.1366	98.1366	ortholog_one2one	NM_031166	Dazl.target
Ide	ENSMUST00000131070	ENSMUSG00000056999	ENSMUSG00000056999.15	ENSMUST00000131070.1	IDE	ENSG00000119912	ENSP00000265986	1	0.0198	0.5068	100	92.8361	95.846	ortholog_one2one	NM_031156	Dazl.target
Idh1	ENSMUST00000097709	ENSMUSG00000025950	ENSMUSG00000025950.16	ENSMUST00000097709.10	IDH1	ENSG00000138413	ENSP00000390265	1	0.0252	0.4202	100	95.6522	95.6522	ortholog_one2one	NM_010497	Dazl.target
Ifrd1	ENSMUST00000001672	ENSMUSG00000001627	ENSMUSG00000001627.12	ENSMUST00000001672.11	IFRD1	ENSG00000006652	ENSP00000384477	1	0.0251	0.3898	75	94.0133	94.4321	ortholog_one2one	NM_013562	Dazl.target
Ift80	ENSMUST00000107812	ENSMUSG00000027778	ENSMUSG00000027778.15	ENSMUST00000107812.7	IFT80	ENSG00000068885	ENSP00000312778	1	0.0279	0.571	75	94.5946	94.5946	ortholog_one2one	NM_026641	Dazl.target
Igf1r	ENSMUST00000005671	ENSMUSG00000005533	ENSMUSG00000005533.10	ENSMUST00000005671.9	IGF1R	ENSG00000140443	ENSP00000497069	1	0.0201	0.6099	25	95.7571	95.6172	ortholog_one2one	NM_010513	Dazl.target
Igfbp7	ENSMUST00000046746	ENSMUSG00000036256	ENSMUSG00000036256.13	ENSMUST00000046746.9	IGFBP7	ENSG00000163453	ENSP00000295666	1	0.0432	0.29	100	91.1348	82.1086	ortholog_one2one	NM_008048	Dazl.target
Igsf11	ENSMUST00000023478	ENSMUSG00000022790	ENSMUSG00000022790.14	ENSMUST00000023478.7	IGSF11	ENSG00000144847	ENSP00000377370	1	0.0581	0.4892	100	88.3991	89.0187	ortholog_one2one	NM_170599	Dazl.target
Igsf3	ENSMUST00000043983	ENSMUSG00000042035	ENSMUSG00000042035.11	ENSMUST00000043983.10	IGSF3	ENSG00000143061	ENSP00000358495	1	0.035	0.7538	100	91.1038	92.6298	ortholog_one2one	NM_207205	Dazl.target
Igsf8	ENSMUST00000039506	ENSMUSG00000038034	ENSMUSG00000038034.15	ENSMUST00000039506.14	IGSF8	ENSG00000162729	ENSP00000357065	1	0.0642	0.4971	75	88.0914	88.3797	ortholog_one2one	NM_080419	Dazl.target
Ik	ENSMUST00000007042	ENSMUSG00000024474	ENSMUSG00000024474.7	ENSMUST00000007042.5	IK	ENSG00000113141	ENSP00000396301	1	0.0069	0.5851	75	98.3842	98.3842	ortholog_one2one	NM_011879	Dazl.target
Il6st	ENSMUST00000183663	ENSMUSG00000021756	ENSMUSG00000021756.12	ENSMUST00000183663.7	IL6ST	ENSG00000134352	ENSP00000370698	1	0.1388	0.8009	100	77.0153	77.0992	ortholog_one2one	NM_010560	Dazl.target
Ilf3	ENSMUST00000213603	ENSMUSG00000032178	ENSMUSG00000032178.14	ENSMUST00000213603.1	ILF3	ENSG00000129351	ENSP00000404121	1	0.0321	0.6257	100	93.0958	93.0958	ortholog_one2one	NM_010561	Dazl.target
Ilk	ENSMUST00000033182	ENSMUSG00000030890	ENSMUSG00000030890.16	ENSMUST00000033182.9	ILK	ENSG00000166333	ENSP00000379975	1	0.0021	0.3991	100	99.5575	99.5575	ortholog_one2one	NM_001161724	Dazl.target
Imp3	ENSMUST00000034827	ENSMUSG00000032288	ENSMUSG00000032288.9	ENSMUST00000034827.9	IMP3	ENSG00000177971	ENSP00000326981	1	0.0166	0.8107	100	96.1957	96.1957	ortholog_one2one	NM_133976	Dazl.target
Imp4	ENSMUST00000027303	ENSMUSG00000026127	ENSMUSG00000026127.13	ENSMUST00000027303.13	IMP4	ENSG00000136718	ENSP00000259239	1	0.0095	0.7968	75	97.9381	97.9381	ortholog_one2one	NM_178601	Dazl.target
Impad1	ENSMUST00000084949	ENSMUSG00000066324	ENSMUSG00000066324.2	ENSMUST00000084949.2	IMPAD1	ENSG00000104331	ENSP00000262644	1	0.0376	0.3869	100	91.0863	91.8539	ortholog_one2one	NM_177730	Dazl.target
Inpp4a	ENSMUST00000027287	ENSMUSG00000026113	ENSMUSG00000026113.17	ENSMUST00000027287.10	INPP4A	ENSG00000040933	ENSP00000074304	1	0.0196	0.4903	100	96.0082	96.0082	ortholog_one2one	NM_030266	Dazl.target
Inpp5a	ENSMUST00000106098	ENSMUSG00000025477	ENSMUSG00000025477.14	ENSMUST00000106098.7	INPP5A	ENSG00000068383	ENSP00000357583	1	0.0311	0.6832	100	94.6602	92.4171	ortholog_one2one	NM_001127363	Dazl.target
Inpp5f	ENSMUST00000043138	ENSMUSG00000042105	ENSMUSG00000042105.18	ENSMUST00000043138.12	INPP5F	ENSG00000198825	ENSP00000497527	1	0.0506	0.5234	100	90.4594	90.4594	ortholog_one2one	NM_178641	Dazl.target
Inppl1	ENSMUST00000035836	ENSMUSG00000032737	ENSMUSG00000032737.13	ENSMUST00000035836.13	INPPL1	ENSG00000165458	ENSP00000298229	1	0.0213	0.5446	100	95.469	95.5449	ortholog_one2one	NM_010567	Dazl.target
Insig1	ENSMUST00000059155	ENSMUSG00000045294	ENSMUSG00000045294.11	ENSMUST00000059155.10	INSIG1	ENSG00000186480	ENSP00000344741	1	0.0893	0.6732	100	79.7834	85.3282	ortholog_one2one	NM_153526	Dazl.target
Ints10	ENSMUST00000034328	ENSMUSG00000031864	ENSMUSG00000031864.16	ENSMUST00000034328.12	INTS10	ENSG00000104613	ENSP00000381064	1	0.0227	0.6313	100	95.6338	92.2554	ortholog_one2one	NM_027590	Dazl.target
Ints14	ENSMUST00000037504	ENSMUSG00000034263	ENSMUSG00000034263.13	ENSMUST00000037504.6	INTS14	ENSG00000138614	ENSP00000498715	1	0.0266	0.4252	100	95.2278	85.2427	ortholog_one2one	NM_175153	Dazl.target
Ints7	ENSMUST00000045450	ENSMUSG00000037461	ENSMUSG00000037461.10	ENSMUST00000045450.6	INTS7	ENSG00000143493	ENSP00000355961	1	0.023	0.644	100	95.3222	94.9275	ortholog_one2one	NM_178632	Dazl.target
Invs	ENSMUST00000030029	ENSMUSG00000028344	ENSMUSG00000028344.12	ENSMUST00000030029.9	INVS	ENSG00000119509	ENSP00000262457	1	0.1145	0.5981	100	80.1878	80.4143	ortholog_one2one	NM_010569	Dazl.target
Ip6k1	ENSMUST00000035214	ENSMUSG00000032594	ENSMUSG00000032594.11	ENSMUST00000035214.10	IP6K1	ENSG00000176095	ENSP00000482032	1	0.0144	0.4321	100	95.0113	96.7667	ortholog_one2one	NM_013785	Dazl.target
Ipmk	ENSMUST00000079252	ENSMUSG00000060733	ENSMUSG00000060733.13	ENSMUST00000079252.12	IPMK	ENSG00000151151	ENSP00000363046	1	0.0911	0.8456	100	79.8077	83.6272	ortholog_one2one	NM_027184	Dazl.target
Ipo5	ENSMUST00000032898	ENSMUSG00000030662	ENSMUSG00000030662.10	ENSMUST00000032898.8	IPO5	ENSG00000065150	ENSP00000261574	1	0.0082	0.5034	100	96.5022	98.0857	ortholog_one2one	NM_001360602	Dazl.target
Iqcb1	ENSMUST00000023535	ENSMUSG00000022837	ENSMUSG00000022837.14	ENSMUST00000023535.3	IQCB1	ENSG00000173226	ENSP00000311505	1	0.066	0.3191	100	86.9565	86.9565	ortholog_one2one	NM_177128	Dazl.target
Irf2bp2	ENSMUST00000054960	ENSMUSG00000051495	ENSMUSG00000051495.7	ENSMUST00000054960.7	IRF2BP2	ENSG00000168264	ENSP00000355568	1	0.0813	0.5872	100	82.4531	84.9123	ortholog_one2one	NM_001164598	Dazl.target
Irf2bpl	ENSMUST00000038422	ENSMUSG00000034168	ENSMUSG00000034168.7	ENSMUST00000038422.7	IRF2BPL	ENSG00000119669	ENSP00000238647	1	0.0138	0.654	100	94.7236	97.2903	ortholog_one2one	NM_145836	Dazl.target
Irf6	ENSMUST00000076521	ENSMUSG00000026638	ENSMUSG00000026638.15	ENSMUST00000076521.6	IRF6	ENSG00000117595	ENSP00000355988	1	0.0108	0.5059	100	97.6445	97.6445	ortholog_one2one	NM_016851	Dazl.target
Isg20l2	ENSMUST00000055984	ENSMUSG00000048039	ENSMUSG00000048039.8	ENSMUST00000055984.6	ISG20L2	ENSG00000143319	ENSP00000323424	1	0.1353	0.5395	100	75.3541	72.2826	ortholog_one2one	NM_177663	Dazl.target
Ist1	ENSMUST00000034164	ENSMUSG00000031729	ENSMUSG00000031729.6	ENSMUST00000034164.5	IST1	ENSG00000182149	ENSP00000438399	1	0.0231	0.3901	75	91.2929	95.5801	ortholog_one2one	NM_028018	Dazl.target
Itfg1	ENSMUST00000034140	ENSMUSG00000031703	ENSMUSG00000031703.8	ENSMUST00000034140.8	ITFG1	ENSG00000129636	ENSP00000319918	1	0.0564	0.4785	100	89.2157	89.5082	ortholog_one2one	NM_028007	Dazl.target
Itga6	ENSMUST00000112101	ENSMUSG00000027111	ENSMUSG00000027111.16	ENSMUST00000112101.7	ITGA6	ENSG00000091409	ENSP00000386896	1	0.0341	0.6079	100	93.1256	93.1256	ortholog_one2one	NM_001277970	Dazl.target
Itgb1	ENSMUST00000090006	ENSMUSG00000025809	ENSMUSG00000025809.15	ENSMUST00000090006.11	ITGB1	ENSG00000150093	ENSP00000379350	1	0.0395	0.5797	50	92.4812	92.4812	ortholog_one2one	NM_010578	Dazl.target
Itm2b	ENSMUST00000022704	ENSMUSG00000022108	ENSMUSG00000022108.8	ENSMUST00000022704.8	ITM2B	ENSG00000136156	ENSP00000497221	1	0.0217	0.8014	75	95.4887	95.4887	ortholog_one2one	NM_008410	Dazl.target
Itm2c	ENSMUST00000027425	ENSMUSG00000026223	ENSMUSG00000026223.15	ENSMUST00000027425.15	ITM2C	ENSG00000135916	ENSP00000322730	1	0.0276	1.0135	100	92.8839	92.1933	ortholog_one2one	NM_022417	Dazl.target
Itpa	ENSMUST00000103193	ENSMUSG00000074797	ENSMUSG00000074797.11	ENSMUST00000103193.4	ITPA	ENSG00000125877	ENSP00000369456	1	0.0474	0.7801	100	88.1443	86.3636	ortholog_one2one	NM_025922	Dazl.target
Ivns1abp	ENSMUST00000023918	ENSMUSG00000023150	ENSMUSG00000023150.14	ENSMUST00000023918.12	IVNS1ABP	ENSG00000116679	ENSP00000356468	1	0.0133	0.2905	100	97.0405	97.0405	ortholog_one2one	NM_054102	Dazl.target
Jade1	ENSMUST00000163764	ENSMUSG00000025764	ENSMUSG00000025764.14	ENSMUST00000163764.7	JADE1	ENSG00000077684	ENSP00000226319	1	0.033	0.375	100	91.924	92.8058	ortholog_one2one	NM_172303	Dazl.target
Jade2	ENSMUST00000020655	ENSMUSG00000020387	ENSMUSG00000020387.15	ENSMUST00000020655.13	JADE2	ENSG00000043143	ENSP00000282605	1	0.0471	0.5374	100	90.2878	90.8323	ortholog_one2one	NM_199299	Dazl.target
Jade3	ENSMUST00000115384	ENSMUSG00000037315	ENSMUSG00000037315.15	ENSMUST00000115384.8	JADE3	ENSG00000102221	ENSP00000481850	1	0.1024	0.4296	100	82.017	81.9175	ortholog_one2one	NM_199317	Dazl.target
Jag1	ENSMUST00000028735	ENSMUSG00000027276	ENSMUSG00000027276.7	ENSMUST00000028735.7	JAG1	ENSG00000101384	ENSP00000254958	1	0.0152	0.5407	100	96.5517	96.5517	ortholog_one2one	NM_013822	Dazl.target
Jak1	ENSMUST00000102781	ENSMUSG00000028530	ENSMUSG00000028530.14	ENSMUST00000102781.9	JAK1	ENSG00000162434	ENSP00000499900	1	0.0257	0.4948	100	94.714	94.7962	ortholog_one2one	NM_146145	Dazl.target
Jam3	ENSMUST00000034472	ENSMUSG00000031990	ENSMUSG00000031990.15	ENSMUST00000034472.15	JAM3	ENSG00000166086	ENSP00000299106	1	0.0774	0.4677	100	86.129	86.129	ortholog_one2one	NM_023277	Dazl.target
Jarid2	ENSMUST00000173246	ENSMUSG00000038518	ENSMUSG00000038518.15	ENSMUST00000173246.7	JARID2	ENSG00000008083	ENSP00000341280	1	0.0337	0.3774	100	91.9743	92.8687	ortholog_one2one	NM_001205043	Dazl.target
Jmjd1c	ENSMUST00000051446	ENSMUSG00000037876	ENSMUSG00000037876.17	ENSMUST00000051446.15	JMJD1C	ENSG00000171988	ENSP00000382204	1	0.0703	0.4735	100	86.0236	86.3636	ortholog_one2one	NM_207221	Dazl.target
Jmy	ENSMUST00000065537	ENSMUSG00000021690	ENSMUSG00000021690.10	ENSMUST00000065537.8	JMY	ENSG00000152409	ENSP00000379441	1	0.0629	0.4651	100	87.3482	87.7925	ortholog_one2one	NM_021310	Dazl.target
Josd1	ENSMUST00000023061	ENSMUSG00000022426	ENSMUSG00000022426.6	ENSMUST00000023061.6	JOSD1	ENSG00000100221	ENSP00000216039	1	0.0138	0.4857	100	97.0297	97.0297	ortholog_one2one	NM_028792	Dazl.target
Jund	ENSMUST00000095267	ENSMUSG00000071076	ENSMUSG00000071076.6	ENSMUST00000095267.5	JUND	ENSG00000130522	ENSP00000252818	1	0.0855	1.8638	100	77.8098	79.1789	ortholog_one2one	NM_001286944	Dazl.target
Kansl1	ENSMUST00000018556	ENSMUSG00000018412	ENSMUSG00000018412.16	ENSMUST00000018556.10	KANSL1	ENSG00000120071	ENSP00000387393	1	0.0412	0.275	50	86.3348	92.0849	ortholog_one2one	NM_001359634	Dazl.target
Kansl2	ENSMUST00000230542	ENSMUSG00000022992	ENSMUSG00000022992.17	ENSMUST00000230542.1	KANSL2	ENSG00000139620	ENSP00000415436	1	0.0229	0.4307	100	94.1057	95.2675	ortholog_one2one	NM_001289438	Dazl.target
Kat6a	ENSMUST00000044331	ENSMUSG00000031540	ENSMUSG00000031540.14	ENSMUST00000044331.6	KAT6A	ENSG00000083168	ENSP00000265713	1	0.0514	0.5246	100	89.2216	89.2661	ortholog_one2one	NM_001081149	Dazl.target
Kat6b	ENSMUST00000182405	ENSMUSG00000021767	ENSMUSG00000021767.19	ENSMUST00000182405.8	KAT6B	ENSG00000156650	ENSP00000287239	1	0.0482	0.405	100	77.2311	90.8111	ortholog_one2one	NM_017479	Dazl.target
Kat7	ENSMUST00000107734	ENSMUSG00000038909	ENSMUSG00000038909.16	ENSMUST00000107734.9	KAT7	ENSG00000136504	ENSP00000259021	1	7e-04	0.4243	100	99.8363	99.8363	ortholog_one2one	NM_001195003	Dazl.target
Kazn	ENSMUST00000036476	ENSMUSG00000040606	ENSMUSG00000040606.13	ENSMUST00000036476.9	KAZN	ENSG00000189337	ENSP00000365198	0	0.076	0.736	100	44.3871	83.0918	ortholog_one2one	NM_001109685	Dazl.target
Kcnab3	ENSMUST00000018614	ENSMUSG00000018470	ENSMUSG00000018470.8	ENSMUST00000018614.2	KCNAB3	ENSG00000170049	ENSP00000302719	1	0.0346	0.4632	100	92.8218	92.8218	ortholog_one2one	NM_010599	Dazl.target
Kctd10	ENSMUST00000102581	ENSMUSG00000001098	ENSMUSG00000001098.15	ENSMUST00000102581.10	KCTD10	ENSG00000110906	ENSP00000228495	1	0.0069	0.6993	100	98.4026	97.4684	ortholog_one2one	NM_026145	Dazl.target
Kctd18	ENSMUST00000114410	ENSMUSG00000054770	ENSMUSG00000054770.16	ENSMUST00000114410.9	KCTD18	ENSG00000155729	ENSP00000352941	1	0.1056	0.4534	100	79.8122	79.2541	ortholog_one2one	NM_001159864	Dazl.target
Kctd20	ENSMUST00000233197	ENSMUSG00000005936	ENSMUSG00000005936.19	ENSMUST00000233197.1	KCTD20	ENSG00000112078	ENSP00000362836	1	0.0482	0.6938	100	90.6921	90.6921	ortholog_one2one	NM_001356300	Dazl.target
Kctd5	ENSMUST00000017090	ENSMUSG00000016946	ENSMUSG00000016946.6	ENSMUST00000017090.5	KCTD5	ENSG00000167977	ENSP00000301738	1	0.0173	0.4176	75	96.1538	96.1538	ortholog_one2one	NM_027008	Dazl.target
Kctd6	ENSMUST00000022272	ENSMUSG00000021752	ENSMUSG00000021752.13	ENSMUST00000022272.13	KCTD6	ENSG00000168301	ENSP00000347188	1	0.004	0.6039	100	99.1561	99.1561	ortholog_one2one	NM_027782	Dazl.target
Kdm1a	ENSMUST00000105847	ENSMUSG00000036940	ENSMUSG00000036940.15	ENSMUST00000105847.7	KDM1A	ENSG00000004487	ENSP00000383042	1	0.0118	0.4298	100	97.1461	97.48	ortholog_one2one	NM_001347221	Dazl.target
Kdm1b	ENSMUST00000037025	ENSMUSG00000038080	ENSMUSG00000038080.17	ENSMUST00000037025.15	KDM1B	ENSG00000165097	ENSP00000297792	1	0.0563	0.5726	100	89.1525	63.6804	ortholog_one2one	NM_172262	Dazl.target
Kdm3b	ENSMUST00000043775	ENSMUSG00000038773	ENSMUSG00000038773.11	ENSMUST00000043775.8	KDM3B	ENSG00000120733	ENSP00000326563	1	0.0317	0.3648	100	93.5264	93.4733	ortholog_one2one	NM_001081256	Dazl.target
Kdm5a	ENSMUST00000005108	ENSMUSG00000030180	ENSMUSG00000030180.15	ENSMUST00000005108.9	KDM5A	ENSG00000073614	ENSP00000382688	1	0.0162	0.3426	50	96.6864	96.6864	ortholog_one2one	NM_145997	Dazl.target
Kdm5b	ENSMUST00000047714	ENSMUSG00000042207	ENSMUSG00000042207.17	ENSMUST00000047714.13	KDM5B	ENSG00000117139	ENSP00000356233	1	0.0289	0.4447	100	91.962	94.1062	ortholog_one2one	NM_152895	Dazl.target
Khdrbs1	ENSMUST00000066257	ENSMUSG00000028790	ENSMUSG00000028790.13	ENSMUST00000066257.5	KHDRBS1	ENSG00000121774	ENSP00000313829	1	0.0274	0.3367	100	94.1309	94.1309	ortholog_one2one	NM_011317	Dazl.target
Khdrbs3	ENSMUST00000022954	ENSMUSG00000022332	ENSMUSG00000022332.8	ENSMUST00000022954.6	KHDRBS3	ENSG00000131773	ENSP00000348108	1	0.0137	0.497	100	96.2428	96.2428	ortholog_one2one	NM_010158	Dazl.target
Kidins220	ENSMUST00000066652	ENSMUSG00000036333	ENSMUSG00000036333.11	ENSMUST00000066652.6	KIDINS220	ENSG00000134313	ENSP00000256707	1	0.0297	0.6302	75	94.0147	92.8611	ortholog_one2one	NM_001081378	Dazl.target
Kif11	ENSMUST00000012587	ENSMUSG00000012443	ENSMUSG00000012443.4	ENSMUST00000012587.3	KIF11	ENSG00000138160	ENSP00000260731	1	0.114	0.5437	100	79.6402	79.943	ortholog_one2one	NM_010615	Dazl.target
Kif1bp	ENSMUST00000065887	ENSMUSG00000036955	ENSMUSG00000036955.16	ENSMUST00000065887.13	KIF1BP	ENSG00000198954	ENSP00000354848	1	0.0411	0.7086	100	91.4654	92.0583	ortholog_one2one	NM_028197	Dazl.target
Kif1c	ENSMUST00000102554	ENSMUSG00000020821	ENSMUSG00000020821.17	ENSMUST00000102554.7	KIF1C	ENSG00000129250	ENSP00000320821	1	0.0303	0.5311	100	93.835	94.0909	ortholog_one2one	NM_153103	Dazl.target
Kif26a	ENSMUST00000128402	ENSMUSG00000021294	ENSMUSG00000021294.7	ENSMUST00000128402.2	KIF26A	ENSG00000066735	ENSP00000388241	1	0.126	0.966	75	78.1084	78.1499	ortholog_one2one	NM_001097621	Dazl.target
Kif2c	ENSMUST00000065896	ENSMUSG00000028678	ENSMUSG00000028678.13	ENSMUST00000065896.8	KIF2C	ENSG00000142945	ENSP00000361298	1	0.0636	0.4326	100	87.4483	87.9334	ortholog_one2one	NM_134471	Dazl.target
Kif5c	ENSMUST00000028102	ENSMUSG00000026764	ENSMUSG00000026764.15	ENSMUST00000028102.13	KIF5C	ENSG00000168280	ENSP00000393379	1	0.0075	0.6183	100	98.2236	98.3264	ortholog_one2one	NM_008449	Dazl.target
Kin	ENSMUST00000042512	ENSMUSG00000037262	ENSMUSG00000037262.7	ENSMUST00000042512.7	KIN	ENSG00000151657	ENSP00000368881	1	0.0396	0.6688	100	92.3664	92.8389	ortholog_one2one	NM_025280	Dazl.target
Kit	ENSMUST00000005815	ENSMUSG00000005672	ENSMUSG00000005672.12	ENSMUST00000005815.6	KIT	ENSG00000157404	ENSP00000288135	1	0.1037	0.6263	100	81.6598	81.4096	ortholog_one2one	NM_001122733	Dazl.target
Klf10	ENSMUST00000074043	ENSMUSG00000037465	ENSMUSG00000037465.10	ENSMUST00000074043.6	KLF10	ENSG00000155090	ENSP00000285407	1	0.0869	0.5034	100	84.5833	84.7599	ortholog_one2one	NM_001357677	Dazl.target
Klf11	ENSMUST00000020982	ENSMUSG00000020653	ENSMUSG00000020653.12	ENSMUST00000020982.6	KLF11	ENSG00000172059	ENSP00000307023	1	0.1452	0.5088	100	74.8047	76.2948	ortholog_one2one	NM_178357	Dazl.target
Klf8	ENSMUST00000112574	ENSMUSG00000041649	ENSMUSG00000041649.13	ENSMUST00000112574.8	KLF8	ENSG00000102349	ENSP00000417303	1	0.0842	0.3884	75	82.7298	83.662	ortholog_one2one	NM_173780	Dazl.target
Klhl11	ENSMUST00000056665	ENSMUSG00000048732	ENSMUSG00000048732.5	ENSMUST00000056665.3	KLHL11	ENSG00000178502	ENSP00000314608	1	0.0164	0.4871	100	96.6102	96.4739	ortholog_one2one	NM_172565	Dazl.target
Klhl12	ENSMUST00000027725	ENSMUSG00000026455	ENSMUSG00000026455.14	ENSMUST00000027725.10	KLHL12	ENSG00000117153	ENSP00000356230	1	0.0034	0.403	100	99.2958	99.2958	ortholog_one2one	NM_001311136	Dazl.target
Klhl21	ENSMUST00000097773	ENSMUSG00000073700	ENSMUSG00000073700.3	ENSMUST00000097773.3	KLHL21	ENSG00000162413	ENSP00000366886	1	0.0155	1.2152	100	96.6499	96.6499	ortholog_one2one	NM_001033352	Dazl.target
Klhl24	ENSMUST00000023509	ENSMUSG00000062901	ENSMUSG00000062901.3	ENSMUST00000023509.4	KLHL24	ENSG00000114796	ENSP00000395012	1	0.003	0.403	100	99.3333	99.3333	ortholog_one2one	NM_029436	Dazl.target
Klhl9	ENSMUST00000094993	ENSMUSG00000070923	ENSMUSG00000070923.4	ENSMUST00000094993.2	KLHL9	ENSG00000198642	ENSP00000351933	1	0.0058	0.4435	50	98.7034	98.7034	ortholog_one2one	NM_172871	Dazl.target
Kmt2c	ENSMUST00000045291	ENSMUSG00000038056	ENSMUSG00000038056.15	ENSMUST00000045291.13	KMT2C	ENSG00000055609	ENSP00000262189	1	0.0781	0.423	100	85.3187	85.4405	ortholog_one2one	NM_001081383	Dazl.target
Kmt2d	ENSMUST00000023741	ENSMUSG00000048154	ENSMUSG00000048154.17	ENSMUST00000023741.15	KMT2D	ENSG00000167548	ENSP00000301067	1	NA	NA	100	88.929	88.1174	ortholog_one2one	NM_001033276	Dazl.target
Knop1	ENSMUST00000116280	ENSMUSG00000030980	ENSMUSG00000030980.17	ENSMUST00000116280.8	KNOP1	ENSG00000103550	ENSP00000219837	1	0.2579	1.2238	100	62.4454	53.7594	ortholog_one2one	NM_023197	Dazl.target
Kpna1	ENSMUST00000004054	ENSMUSG00000022905	ENSMUSG00000022905.12	ENSMUST00000004054.12	KPNA1	ENSG00000114030	ENSP00000343701	1	0.0103	0.3045	100	97.7695	97.7695	ortholog_one2one	NM_008465	Dazl.target
Kpna3	ENSMUST00000022496	ENSMUSG00000021929	ENSMUSG00000021929.9	ENSMUST00000022496.8	KPNA3	ENSG00000102753	ENSP00000261667	1	0.0036	0.2834	100	99.2322	99.2322	ortholog_one2one	NM_008466	Dazl.target
Kpna4	ENSMUST00000194558	ENSMUSG00000027782	ENSMUSG00000027782.10	ENSMUST00000194558.5	KPNA4	ENSG00000186432	ENSP00000334373	1	0.0051	0.2255	100	98.8484	98.8484	ortholog_one2one	NM_008467	Dazl.target
Kpnb1	ENSMUST00000001479	ENSMUSG00000001440	ENSMUSG00000001440.5	ENSMUST00000001479.4	KPNB1	ENSG00000108424	ENSP00000290158	1	0.0039	0.3466	75	99.2009	99.2009	ortholog_one2one	NM_008379	Dazl.target
Kras	ENSMUST00000032399	ENSMUSG00000030265	ENSMUSG00000030265.14	ENSMUST00000032399.11	KRAS	ENSG00000133703	ENSP00000256078	1	0.0732	0.4995	100	88.3598	88.8298	ortholog_one2one	NM_021284	Dazl.target
Krr1	ENSMUST00000163048	ENSMUSG00000063334	ENSMUSG00000063334.16	ENSMUST00000163048.7	KRR1	ENSG00000111615	ENSP00000229214	1	0.0479	0.7991	100	85.5643	85.7895	ortholog_one2one	NM_178610	Dazl.target
Lamb1	ENSMUST00000002979	ENSMUSG00000002900	ENSMUSG00000002900.16	ENSMUST00000002979.14	LAMB1	ENSG00000091136	ENSP00000222399	1	0.0357	0.6395	50	92.7772	90.349	ortholog_one2one	NM_008482	Dazl.target
Lamp1	ENSMUST00000033824	ENSMUSG00000031447	ENSMUSG00000031447.7	ENSMUST00000033824.7	LAMP1	ENSG00000185896	ENSP00000333298	1	0.2278	0.764	100	66.4269	68.2266	ortholog_one2one	NM_001317353	Dazl.target
Lamp2	ENSMUST00000061755	ENSMUSG00000016534	ENSMUSG00000016534.15	ENSMUST00000061755.8	LAMP2	ENSG00000005893	ENSP00000408411	1	0.2272	0.3939	100	66.18	65.3846	ortholog_one2one	NM_010685	Dazl.target
Lamtor1	ENSMUST00000033131	ENSMUSG00000030842	ENSMUSG00000030842.12	ENSMUST00000033131.11	LAMTOR1	ENSG00000149357	ENSP00000278671	1	0.0142	0.4184	75	96.2733	96.2733	ortholog_one2one	NM_025605	Dazl.target
Laptm4a	ENSMUST00000020909	ENSMUSG00000020585	ENSMUSG00000020585.4	ENSMUST00000020909.3	LAPTM4A	ENSG00000068697	ENSP00000175091	1	0.0124	0.316	100	97.4249	73.7013	ortholog_one2one	NM_008640	Dazl.target
Larp1	ENSMUST00000178636	ENSMUSG00000037331	ENSMUSG00000037331.15	ENSMUST00000178636.1	LARP1	ENSG00000155506	ENSP00000336721	1	0.0652	0.4943	100	89.8921	85.4478	ortholog_one2one	NM_028451	Dazl.target
Larp4	ENSMUST00000231160	ENSMUSG00000023025	ENSMUSG00000023025.16	ENSMUST00000231160.1	LARP4	ENSG00000161813	ENSP00000415464	1	0.0794	0.4372	100	82.8767	84.1446	ortholog_one2one	NM_001284521	Dazl.target
Larp4b	ENSMUST00000188211	ENSMUSG00000033499	ENSMUSG00000033499.14	ENSMUST00000188211.7	LARP4B	ENSG00000107929	ENSP00000482767	1	0.0637	0.4141	100	87.6694	87.3144	ortholog_one2one	NM_172585	Dazl.target
Lars2	ENSMUST00000038863	ENSMUSG00000035202	ENSMUSG00000035202.8	ENSMUST00000038863.8	LARS2	ENSG00000011376	ENSP00000498867	1	0.0726	0.5387	100	86.4895	86.5854	ortholog_one2one	NM_153168	Dazl.target
Lbr	ENSMUST00000005003	ENSMUSG00000004880	ENSMUSG00000004880.11	ENSMUST00000005003.11	LBR	ENSG00000143815	ENSP00000339883	1	0.1149	0.7534	100	80.3252	78.9137	ortholog_one2one	NM_133815	Dazl.target
Lca5	ENSMUST00000034791	ENSMUSG00000032258	ENSMUSG00000032258.15	ENSMUST00000034791.14	LCA5	ENSG00000135338	ENSP00000376686	1	0.1898	0.8596	100	69.297	68.608	ortholog_one2one	NM_027448	Dazl.target
Lcorl	ENSMUST00000087164	ENSMUSG00000015882	ENSMUSG00000015882.18	ENSMUST00000087164.9	LCORL	ENSG00000178177	ENSP00000371661	1	0.0212	0.1153	100	94.8505	95.1667	ortholog_one2one	NM_172153	Dazl.target
Ldb1	ENSMUST00000185355	ENSMUSG00000025223	ENSMUSG00000025223.15	ENSMUST00000185355.6	LDB1	ENSG00000198728	ENSP00000392466	1	0.001	0.3486	100	99.7567	99.7567	ortholog_one2one	NM_001113408	Dazl.target
Lef1	ENSMUST00000098611	ENSMUSG00000027985	ENSMUSG00000027985.14	ENSMUST00000098611.3	LEF1	ENSG00000138795	ENSP00000265165	1	0.0105	0.3757	100	97.2431	97.733	ortholog_one2one	NM_001276403	Dazl.target
Lemd3	ENSMUST00000119944	ENSMUSG00000048661	ENSMUSG00000048661.14	ENSMUST00000119944.7	LEMD3	ENSG00000174106	ENSP00000308369	1	0.0759	0.4354	100	83.5346	82.8976	ortholog_one2one	NM_001081193	Dazl.target
Leprotl1	ENSMUST00000033910	ENSMUSG00000031513	ENSMUSG00000031513.8	ENSMUST00000033910.8	LEPROTL1	ENSG00000104660	ENSP00000428281	1	0.1951	0.734	100	56.213	72.5191	ortholog_one2one	NM_026609	Dazl.target
Lgmn	ENSMUST00000021607	ENSMUSG00000021190	ENSMUSG00000021190.14	ENSMUST00000021607.8	LGMN	ENSG00000100600	ENSP00000376911	1	0.0969	0.8783	100	83.3718	82.9885	ortholog_one2one	NM_011175	Dazl.target
Lifr	ENSMUST00000164529	ENSMUSG00000054263	ENSMUSG00000054263.12	ENSMUST00000164529.8	LIFR	ENSG00000113594	ENSP00000398368	1	0.1485	0.7601	100	75.2051	75.5495	ortholog_one2one	NM_001113386	Dazl.target
Lig3	ENSMUST00000092849	ENSMUSG00000020697	ENSMUSG00000020697.16	ENSMUST00000092849.11	LIG3	ENSG00000005156	ENSP00000367787	1	0.0619	0.4031	100	88.4044	88.1423	ortholog_one2one	NM_001291245	Dazl.target
Lima1	ENSMUST00000073691	ENSMUSG00000023022	ENSMUSG00000023022.14	ENSMUST00000073691.4	LIMA1	ENSG00000050405	ENSP00000378400	1	0.1413	0.6441	100	75.7895	76.494	ortholog_one2one	NM_001113545	Dazl.target
Limk1	ENSMUST00000015137	ENSMUSG00000029674	ENSMUSG00000029674.13	ENSMUST00000015137.9	LIMK1	ENSG00000106683	ENSP00000336740	1	0.0217	0.8545	100	95.2087	95.2087	ortholog_one2one	NM_010717	Dazl.target
Lin28a	ENSMUST00000051674	ENSMUSG00000050966	ENSMUSG00000050966.9	ENSMUST00000051674.2	LIN28A	ENSG00000131914	ENSP00000363314	1	0.0167	0.4756	100	96.6507	96.6507	ortholog_one2one	NM_145833	Dazl.target
Lin28b	ENSMUST00000079390	ENSMUSG00000063804	ENSMUSG00000063804.8	ENSMUST00000079390.6	LIN28B	ENSG00000187772	ENSP00000344401	1	0.0741	0.4447	100	85.6	78.9668	ortholog_one2one	NM_001031772	Dazl.target
Lin7c	ENSMUST00000028583	ENSMUSG00000027162	ENSMUSG00000027162.7	ENSMUST00000028583.7	LIN7C	ENSG00000148943	ENSP00000278193	1	0	0	100	100	100	ortholog_one2one	NM_011699	Dazl.target
Lin9	ENSMUST00000192561	ENSMUSG00000058729	ENSMUSG00000058729.13	ENSMUST00000192561.5	LIN9	ENSG00000183814	ENSP00000329102	1	0.014	0.4696	100	97.1326	97.1326	ortholog_one2one	NM_001103182	Dazl.target
Lipa	ENSMUST00000178114	ENSMUSG00000024781	ENSMUSG00000024781.16	ENSMUST00000178114.1	LIPA	ENSG00000107798	ENSP00000337354	1	0.1532	0.6357	100	73.6842	74.0554	ortholog_one2one	NM_001111100	Dazl.target
Llgl1	ENSMUST00000108719	ENSMUSG00000020536	ENSMUSG00000020536.12	ENSMUST00000108719.3	LLGL1	ENSG00000131899	ENSP00000321537	1	0.0532	0.7354	100	90.0376	90.2072	ortholog_one2one	NM_001159404	Dazl.target
Lman1	ENSMUST00000048260	ENSMUSG00000041891	ENSMUSG00000041891.16	ENSMUST00000048260.14	LMAN1	ENSG00000074695	ENSP00000251047	1	0.0571	0.5696	100	88.8235	87.6209	ortholog_one2one	NM_027400	Dazl.target
Lman2	ENSMUST00000021940	ENSMUSG00000021484	ENSMUSG00000021484.8	ENSMUST00000021940.7	LMAN2	ENSG00000169223	ENSP00000303366	1	0.0235	0.8264	75	94.382	93.8548	ortholog_one2one	NM_025828	Dazl.target
Lmbrd1	ENSMUST00000191471	ENSMUSG00000073725	ENSMUSG00000073725.8	ENSMUST00000191471.6	LMBRD1	ENSG00000168216	ENSP00000497690	1	0.0363	0.6983	100	92.7778	93.2961	ortholog_one2one	NM_026719	Dazl.target
Lmnb1	ENSMUST00000025486	ENSMUSG00000024590	ENSMUSG00000024590.8	ENSMUST00000025486.8	LMNB1	ENSG00000113368	ENSP00000261366	1	0.0187	0.6334	100	96.0751	95.7483	ortholog_one2one	NM_010721	Dazl.target
Lnpep	ENSMUST00000041047	ENSMUSG00000023845	ENSMUSG00000023845.7	ENSMUST00000041047.3	LNPEP	ENSG00000113441	ENSP00000231368	1	0.0672	0.4223	50	87.6098	87.6098	ortholog_one2one	NM_172827	Dazl.target
Lnx2	ENSMUST00000016664	ENSMUSG00000016520	ENSMUSG00000016520.7	ENSMUST00000016664.7	LNX2	ENSG00000139517	ENSP00000325929	1	0.0568	1.1147	100	89.5652	89.9563	ortholog_one2one	NM_080795	Dazl.target
Lonrf3	ENSMUST00000016383	ENSMUSG00000016239	ENSMUSG00000016239.11	ENSMUST00000016383.9	LONRF3	ENSG00000175556	ENSP00000360690	1	0.1094	0.468	75	79.9736	80.6109	ortholog_one2one	NM_028894	Dazl.target
Lpar2	ENSMUST00000164890	ENSMUSG00000031861	ENSMUSG00000031861.16	ENSMUST00000164890.7	LPAR2	ENSG00000064547	ENSP00000443256	1	0.0427	0.8172	100	91.453	92.2414	ortholog_one2one	NM_020028	Dazl.target
Lpcat3	ENSMUST00000004381	ENSMUSG00000004270	ENSMUSG00000004270.13	ENSMUST00000004381.13	LPCAT3	ENSG00000111684	ENSP00000261407	1	0.0702	0.3931	100	87.269	87.269	ortholog_one2one	NM_145130	Dazl.target
Lpin2	ENSMUST00000126681	ENSMUSG00000024052	ENSMUSG00000024052.17	ENSMUST00000126681.7	LPIN2	ENSG00000101577	ENSP00000261596	1	0.056	0.5399	100	89.2857	85.9291	ortholog_one2one	NM_001164885	Dazl.target
Lrba	ENSMUST00000107635	ENSMUSG00000028080	ENSMUSG00000028080.16	ENSMUST00000107635.6	LRBA	ENSG00000198589	ENSP00000349629	1	0.0503	0.4248	75	90.3947	90.6797	ortholog_one2one	NM_030695	Dazl.target
Lrig1	ENSMUST00000101126	ENSMUSG00000030029	ENSMUSG00000030029.14	ENSMUST00000101126.2	LRIG1	ENSG00000144749	ENSP00000273261	1	0.0904	0.6009	100	82.9826	83.1347	ortholog_one2one	NM_008377	Dazl.target
Lrp11	ENSMUST00000019931	ENSMUSG00000019796	ENSMUSG00000019796.12	ENSMUST00000019931.11	LRP11	ENSG00000120256	ENSP00000239367	1	0.1843	0.7605	75	67.6	69.9793	ortholog_one2one	NM_172784	Dazl.target
Lrrc1	ENSMUST00000183873	ENSMUSG00000032352	ENSMUSG00000032352.16	ENSMUST00000183873.7	LRRC1	ENSG00000137269	ENSP00000359925	1	0.0372	0.4091	100	93.1298	93.1298	ortholog_one2one	NM_001146048	Dazl.target
Lrrc40	ENSMUST00000072080	ENSMUSG00000063052	ENSMUSG00000063052.9	ENSMUST00000072080.9	LRRC40	ENSG00000066557	ENSP00000359990	1	0.0996	0.6275	100	83.0565	83.0565	ortholog_one2one	NM_024194	Dazl.target
Lrrc42	ENSMUST00000030360	ENSMUSG00000028617	ENSMUSG00000028617.10	ENSMUST00000030360.10	LRRC42	ENSG00000116212	ENSP00000360421	1	0.0674	0.5597	100	86.6822	88.1235	ortholog_one2one	NM_029985	Dazl.target
Lrrc47	ENSMUST00000030894	ENSMUSG00000029028	ENSMUSG00000029028.14	ENSMUST00000030894.14	LRRC47	ENSG00000130764	ENSP00000367498	1	0.0643	0.9905	100	87.307	87.6076	ortholog_one2one	NM_201226	Dazl.target
Lrrc58	ENSMUST00000078717	ENSMUSG00000034158	ENSMUSG00000034158.9	ENSMUST00000078717.6	LRRC58	ENSG00000163428	ENSP00000295628	1	0.0368	0.396	100	92.1833	93.4426	ortholog_one2one	NM_177093	Dazl.target
Lsm1	ENSMUST00000038421	ENSMUSG00000037296	ENSMUSG00000037296.7	ENSMUST00000038421.7	LSM1	ENSG00000175324	ENSP00000310596	1	0.0114	0.3954	100	97.7444	97.7444	ortholog_one2one	NM_026032	Dazl.target
Lsm14a	ENSMUST00000085585	ENSMUSG00000066568	ENSMUSG00000066568.12	ENSMUST00000085585.11	LSM14A	ENSG00000257103	ENSP00000446271	1	0.0341	0.3805	100	93.3045	93.5065	ortholog_one2one	NM_025948	Dazl.target
Lsm14b	ENSMUST00000055485	ENSMUSG00000039108	ENSMUSG00000039108.14	ENSMUST00000055485.11	LSM14B	ENSG00000149657	ENSP00000279068	1	0.0257	0.4761	100	94.5455	94.5455	ortholog_one2one	NM_177727	Dazl.target
Lsm2	ENSMUST00000114011	ENSMUSG00000007050	ENSMUSG00000007050.17	ENSMUST00000114011.10	LSM2	ENSG00000204392	ENSP00000364813	1	0.0048	0.41	100	98.9474	71.7557	ortholog_one2one	NM_001110101	Dazl.target
Lsm3	ENSMUST00000206947	ENSMUSG00000034192	ENSMUSG00000034192.5	ENSMUST00000206947.1	LSM3	ENSG00000170860	ENSP00000302160	1	0	0	100	100	100	ortholog_one2one	NM_026309	Dazl.target
Lsm4	ENSMUST00000034311	ENSMUSG00000031848	ENSMUSG00000031848.15	ENSMUST00000034311.14	LSM4	ENSG00000130520	ENSP00000469468	1	0.0124	0.9228	100	96.4029	97.1014	ortholog_one2one	NM_015816	Dazl.target
Lsm6	ENSMUST00000130325	ENSMUSG00000031683	ENSMUSG00000031683.16	ENSMUST00000130325.7	LSM6	ENSG00000164167	ENSP00000296581	1	0	0	100	100	100	ortholog_one2one	NM_001191004	Dazl.target
Lsm8	ENSMUST00000056398	ENSMUSG00000044155	ENSMUSG00000044155.11	ENSMUST00000056398.10	LSM8	ENSG00000128534	ENSP00000249299	1	0	0	100	100	100	ortholog_one2one	NM_133939	Dazl.target
Ltv1	ENSMUST00000019950	ENSMUSG00000019814	ENSMUSG00000019814.5	ENSMUST00000019950.5	LTV1	ENSG00000135521	ENSP00000356548	1	0.0859	0.6271	100	85.4737	86.383	ortholog_one2one	NM_181470	Dazl.target
Luc7l	ENSMUST00000114976	ENSMUSG00000024188	ENSMUSG00000024188.16	ENSMUST00000114976.8	LUC7L	ENSG00000007392	ENSP00000293872	1	0.0147	0.4149	50	97.035	97.035	ortholog_one2one	NM_028190	Dazl.target
Luc7l3	ENSMUST00000107821	ENSMUSG00000020863	ENSMUSG00000020863.15	ENSMUST00000107821.8	LUC7L3	ENSG00000108848	ENSP00000376919	1	0.0206	0.4091	100	96.1145	95.723	ortholog_one2one	NM_001361575	Dazl.target
Lyar	ENSMUST00000087514	ENSMUSG00000067367	ENSMUSG00000067367.9	ENSMUST00000087514.8	LYAR	ENSG00000145220	ENSP00000345917	1	0.1839	1.5305	100	71.2401	69.5876	ortholog_one2one	NM_025281	Dazl.target
Lypla1	ENSMUST00000027036	ENSMUSG00000025903	ENSMUSG00000025903.14	ENSMUST00000027036.10	LYPLA1	ENSG00000120992	ENSP00000320043	1	0.0421	0.4416	100	91.3043	91.3043	ortholog_one2one	NM_008866	Dazl.target
Lypla2	ENSMUST00000067567	ENSMUSG00000028670	ENSMUSG00000028670.14	ENSMUST00000067567.4	LYPLA2	ENSG00000011009	ENSP00000363638	1	0.0061	0.2908	100	98.7013	98.7013	ortholog_one2one	NM_011942	Dazl.target
Lzts2	ENSMUST00000179108	ENSMUSG00000035342	ENSMUSG00000035342.14	ENSMUST00000179108.8	LZTS2	ENSG00000107816	ENSP00000359240	1	0.0369	0.5508	100	92.2272	91.9523	ortholog_one2one	NM_145503	Dazl.target
M6pr	ENSMUST00000007602	ENSMUSG00000007458	ENSMUSG00000007458.14	ENSMUST00000007602.14	M6PR	ENSG00000003056	ENSP00000000412	1	0.0391	0.4681	100	92.0578	91.7266	ortholog_one2one	NM_010749	Dazl.target
Macf1	ENSMUST00000082108	ENSMUSG00000028649	ENSMUSG00000028649.20	ENSMUST00000082108.11	MACF1	ENSG00000127603	ENSP00000354573	1	0.0396	0.4247	100	90.6446	66.9205	ortholog_one2one	NM_001199137	Dazl.target
Maea	ENSMUST00000114449	ENSMUSG00000079562	ENSMUSG00000079562.7	ENSMUST00000114449.6	MAEA	ENSG00000090316	ENSP00000302830	1	0.0055	0.917	100	98.7374	98.7374	ortholog_one2one	NM_021500	Dazl.target
Maf1	ENSMUST00000023212	ENSMUSG00000022553	ENSMUSG00000022553.16	ENSMUST00000023212.14	MAF1	ENSG00000179632	ENSP00000318604	1	0.024	0.8301	100	93.75	93.0233	ortholog_one2one	NM_026859	Dazl.target
Mafg	ENSMUST00000058162	ENSMUSG00000051510	ENSMUSG00000051510.13	ENSMUST00000058162.13	MAFG	ENSG00000197063	ENSP00000350369	1	0.005	0.9032	100	98.7654	98.7654	ortholog_one2one	NM_010756	Dazl.target
Mageb16	ENSMUST00000052283	ENSMUSG00000046942	ENSMUSG00000046942.17	ENSMUST00000052283.6	MAGEB16	ENSG00000189023	ENSP00000382871	0	0.4034	1.0732	75	52.7778	47.1074	ortholog_one2one	NM_028025	Dazl.target
Mageb4	ENSMUST00000113969	ENSMUSG00000035427	ENSMUSG00000035427.18	ENSMUST00000113969.9	MAGEB2	ENSG00000099399	ENSP00000368273	0	0.3403	0.5374	100	54.232	31.1151	ortholog_one2one	NM_001033492	Dazl.target
Maged1	ENSMUST00000026142	ENSMUSG00000025151	ENSMUSG00000025151.16	ENSMUST00000026142.7	MAGED1	ENSG00000179222	ENSP00000364847	1	0.0614	0.3219	25	81.5348	87.7419	ortholog_one2one	NM_019791	Dazl.target
Man2a1	ENSMUST00000086723	ENSMUSG00000024085	ENSMUSG00000024085.13	ENSMUST00000086723.9	MAN2A1	ENSG00000112893	ENSP00000261483	1	0.1161	0.631	75	80.9441	80.5217	ortholog_one2one	NM_008549	Dazl.target
Map3k1	ENSMUST00000109267	ENSMUSG00000021754	ENSMUSG00000021754.17	ENSMUST00000109267.8	MAP3K1	ENSG00000095015	ENSP00000382423	1	0.0532	0.5425	100	89.2857	90.422	ortholog_one2one	NM_011945	Dazl.target
Map3k12	ENSMUST00000169377	ENSMUSG00000023050	ENSMUSG00000023050.9	ENSMUST00000169377.7	MAP3K12	ENSG00000139625	ENSP00000449038	1	0.0205	0.3566	100	95.6278	96.0586	ortholog_one2one	NM_001163643	Dazl.target
Map3k15	ENSMUST00000033665	ENSMUSG00000031303	ENSMUSG00000031303.8	ENSMUST00000033665.8	MAP3K15	ENSG00000180815	ENSP00000345629	1	0.0706	0.5214	100	86.7479	85.5748	ortholog_one2one	NM_001163085	Dazl.target
Map3k4	ENSMUST00000233755	ENSMUSG00000014426	ENSMUSG00000014426.9	ENSMUST00000233755.1	MAP3K4	ENSG00000085511	ENSP00000375986	1	0.0577	0.7618	100	88.3085	88.9167	ortholog_one2one	NM_001357722	Dazl.target
Map3k5	ENSMUST00000095806	ENSMUSG00000071369	ENSMUSG00000071369.11	ENSMUST00000095806.9	MAP3K5	ENSG00000197442	ENSP00000351908	1	0.0279	0.6245	100	94.6143	94.2029	ortholog_one2one	NM_008580	Dazl.target
Map4	ENSMUST00000035055	ENSMUSG00000032479	ENSMUSG00000032479.15	ENSMUST00000035055.14	MAP4	ENSG00000047849	ENSP00000353375	1	0.2761	0.3997	100	60.2431	61.6889	ortholog_one2one	NM_001205330	Dazl.target
Map4k3	ENSMUST00000025089	ENSMUSG00000024242	ENSMUSG00000024242.15	ENSMUST00000025089.8	MAP4K3	ENSG00000011566	ENSP00000263881	1	0.0193	0.5128	100	95.9732	95.9732	ortholog_one2one	NM_001290345	Dazl.target
Map4k4	ENSMUST00000193682	ENSMUSG00000026074	ENSMUSG00000026074.15	ENSMUST00000193682.5	MAP4K4	ENSG00000071054	ENSP00000343658	1	0.0085	0.4762	100	92.773	91.6925	ortholog_one2one	NM_001252201	Dazl.target
Map7d2	ENSMUST00000112471	ENSMUSG00000041020	ENSMUSG00000041020.14	ENSMUST00000112471.8	MAP7D2	ENSG00000184368	ENSP00000368964	1	0.1407	0.5697	100	70.8926	70.1665	ortholog_one2one	NM_001313751	Dazl.target
Mapk1	ENSMUST00000115731	ENSMUSG00000063358	ENSMUSG00000063358.17	ENSMUST00000115731.9	MAPK1	ENSG00000100030	ENSP00000215832	1	0.0053	0.3202	100	98.6111	99.162	ortholog_one2one	NM_001038663	Dazl.target
Mapk14	ENSMUST00000062694	ENSMUSG00000053436	ENSMUSG00000053436.15	ENSMUST00000062694.15	MAPK14	ENSG00000112062	ENSP00000229795	1	0.0025	0.5522	100	99.4444	99.4444	ortholog_one2one	NM_011951	Dazl.target
Mapk6	ENSMUST00000049355	ENSMUSG00000042688	ENSMUSG00000042688.16	ENSMUST00000049355.10	MAPK6	ENSG00000069956	ENSP00000261845	1	0.0255	0.5472	100	94.1748	94.3056	ortholog_one2one	NM_015806	Dazl.target
Mapk8	ENSMUST00000022504	ENSMUSG00000021936	ENSMUSG00000021936.14	ENSMUST00000022504.11	MAPK8	ENSG00000107643	ENSP00000378974	1	0.0042	0.2694	75	99.0632	99.0632	ortholog_one2one	NM_001310453	Dazl.target
Mapre1	ENSMUST00000028981	ENSMUSG00000027479	ENSMUSG00000027479.14	ENSMUST00000028981.8	MAPRE1	ENSG00000101367	ENSP00000364721	1	0.0164	0.3311	100	97.0149	97.0149	ortholog_one2one	NM_007896	Dazl.target
March5	ENSMUST00000024078	ENSMUSG00000023307	ENSMUSG00000023307.14	ENSMUST00000024078.14	MARCH5	ENSG00000198060	ENSP00000351813	1	0	0	100	100	100	ortholog_one2one	NM_027314	Dazl.target
March6	ENSMUST00000090227	ENSMUSG00000039100	ENSMUSG00000039100.10	ENSMUST00000090227.5	MARCH6	ENSG00000145495	ENSP00000274140	1	0.0108	0.3987	100	97.9121	98.0198	ortholog_one2one	NM_172606	Dazl.target
March7	ENSMUST00000102748	ENSMUSG00000026977	ENSMUSG00000026977.17	ENSMUST00000102748.10	MARCH7	ENSG00000136536	ENSP00000386830	1	0.0662	0.4221	100	84.6591	86.0029	ortholog_one2one	NM_020575	Dazl.target
March8	ENSMUST00000101032	ENSMUSG00000025702	ENSMUSG00000025702.15	ENSMUST00000101032.9	MARCH8	ENSG00000165406	ENSP00000411848	0	0.0356	0.3991	100	45.8988	91.958	ortholog_one2one	NM_027920	Dazl.target
Marcksl1	ENSMUST00000062356	ENSMUSG00000047945	ENSMUSG00000047945.6	ENSMUST00000062356.6	MARCKSL1	ENSG00000175130	ENSP00000362638	1	0.0203	0.215	75	95.8974	93.5	ortholog_one2one	NM_010807	Dazl.target
Marf1	ENSMUST00000090300	ENSMUSG00000060657	ENSMUSG00000060657.8	ENSMUST00000090300.5	MARF1	ENSG00000166783	ENSP00000379654	1	0.077	0.4803	100	85.8783	86.1751	ortholog_one2one	NM_001081154	Dazl.target
Mark1	ENSMUST00000027929	ENSMUSG00000026620	ENSMUSG00000026620.11	ENSMUST00000027929.9	MARK1	ENSG00000116141	ENSP00000483424	1	0.0288	0.6168	100	93.7186	93.8365	ortholog_one2one	NM_145515	Dazl.target
Mark2	ENSMUST00000051711	ENSMUSG00000024969	ENSMUSG00000024969.15	ENSMUST00000051711.15	MARK2	ENSG00000072518	ENSP00000385751	1	0.0076	0.325	100	96.5736	98.067	ortholog_one2one	NM_007928	Dazl.target
Mark3	ENSMUST00000084953	ENSMUSG00000007411	ENSMUSG00000007411.16	ENSMUST00000084953.12	MARK3	ENSG00000075413	ENSP00000411397	1	0.0143	0.4648	100	95.8831	97.043	ortholog_one2one	NM_021516	Dazl.target
Marveld2	ENSMUST00000022137	ENSMUSG00000021636	ENSMUSG00000021636.15	ENSMUST00000022137.13	MARVELD2	ENSG00000152939	ENSP00000323264	1	0.0707	0.5329	100	87.276	87.7477	ortholog_one2one	NM_001038602	Dazl.target
Mat2b	ENSMUST00000040167	ENSMUSG00000042032	ENSMUSG00000042032.13	ENSMUST00000040167.10	MAT2B	ENSG00000038274	ENSP00000325425	1	0.0297	0.4781	100	94.3114	94.3114	ortholog_one2one	NM_134017	Dazl.target
Mb21d2	ENSMUST00000100023	ENSMUSG00000051065	ENSMUSG00000051065.9	ENSMUST00000100023.2	MB21D2	ENSG00000180611	ENSP00000376246	1	0.0064	0.6145	100	98.5743	98.5743	ortholog_one2one	NM_177718	Dazl.target
Mbd2	ENSMUST00000074058	ENSMUSG00000024513	ENSMUSG00000024513.16	ENSMUST00000074058.10	MBD2	ENSG00000134046	ENSP00000256429	1	0.0129	0.2788	100	97.5669	96.8599	ortholog_one2one	NM_010773	Dazl.target
Mbnl1	ENSMUST00000099087	ENSMUSG00000027763	ENSMUSG00000027763.13	ENSMUST00000099087.7	MBNL1	ENSG00000152601	ENSP00000282486	1	0.0014	0.1909	100	94.8454	96.5879	ortholog_one2one	NM_020007	Dazl.target
Mbnl2	ENSMUST00000167459	ENSMUSG00000022139	ENSMUSG00000022139.17	ENSMUST00000167459.2	MBNL2	ENSG00000139793	ENSP00000365861	1	0.0829	0.3891	100	84.9866	84.9866	ortholog_one2one	NM_001360377	Dazl.target
Mboat7	ENSMUST00000038608	ENSMUSG00000035596	ENSMUSG00000035596.14	ENSMUST00000038608.13	MBOAT7	ENSG00000125505	ENSP00000245615	1	0.0342	0.5882	100	93.6441	93.4461	ortholog_one2one	NM_029934	Dazl.target
Mcam	ENSMUST00000034650	ENSMUSG00000032135	ENSMUSG00000032135.15	ENSMUST00000034650.14	MCAM	ENSG00000076706	ENSP00000264036	1	0.1382	0.6188	75	76.3158	76.0802	ortholog_one2one	NM_023061	Dazl.target
Mcm2	ENSMUST00000058011	ENSMUSG00000002870	ENSMUSG00000002870.8	ENSMUST00000058011.7	MCM2	ENSG00000073111	ENSP00000265056	1	0.0188	0.9572	100	96.0177	96.0177	ortholog_one2one	NM_008564	Dazl.target
Mcm3	ENSMUST00000053266	ENSMUSG00000041859	ENSMUSG00000041859.10	ENSMUST00000053266.10	MCM3	ENSG00000112118	ENSP00000480987	1	0.0347	0.56	100	88.3939	92.8571	ortholog_one2one	NM_008563	Dazl.target
Mcm4	ENSMUST00000023353	ENSMUSG00000022673	ENSMUSG00000022673.5	ENSMUST00000023353.3	MCM4	ENSG00000104738	ENSP00000262105	1	0.0254	0.522	100	94.9015	95.0116	ortholog_one2one	NM_008565	Dazl.target
Mcmbp	ENSMUST00000057557	ENSMUSG00000048170	ENSMUSG00000048170.14	ENSMUST00000057557.13	MCMBP	ENSG00000197771	ENSP00000353098	1	0.0356	0.716	100	92.6791	92.6791	ortholog_one2one	NM_145955	Dazl.target
Mdm2	ENSMUST00000020408	ENSMUSG00000020184	ENSMUSG00000020184.15	ENSMUST00000020408.15	MDM2	ENSG00000135679	ENSP00000258149	1	0.0881	0.7805	100	80.4829	81.7996	ortholog_one2one	NM_010786	Dazl.target
Mdm4	ENSMUST00000067429	ENSMUSG00000054387	ENSMUSG00000054387.13	ENSMUST00000067429.9	MDM4	ENSG00000198625	ENSP00000356150	1	0.0899	0.468	100	84.0816	84.0816	ortholog_one2one	NM_008575	Dazl.target
Mdn1	ENSMUST00000178134	ENSMUSG00000058006	ENSMUSG00000058006.12	ENSMUST00000178134.1	MDN1	ENSG00000112159	ENSP00000358400	1	0.1023	0.4701	100	82.3624	82.569	ortholog_one2one	NM_001081392	Dazl.target
Med10	ENSMUST00000022089	ENSMUSG00000021598	ENSMUSG00000021598.9	ENSMUST00000022089.9	MED10	ENSG00000133398	ENSP00000255764	1	0.0033	0.6416	100	99.2593	99.2593	ortholog_one2one	NM_138596	Dazl.target
Med13l	ENSMUST00000100816	ENSMUSG00000018076	ENSMUSG00000018076.12	ENSMUST00000100816.7	MED13L	ENSG00000123066	ENSP00000281928	1	0.0379	0.4681	100	92.2624	92.0126	ortholog_one2one	NM_172424	Dazl.target
Med19	ENSMUST00000102645	ENSMUSG00000027080	ENSMUSG00000027080.6	ENSMUST00000102645.3	MED19	ENSG00000156603	ENSP00000498791	1	0.0269	0.5447	100	88.5057	94.6721	ortholog_one2one	NM_025885	Dazl.target
Med21	ENSMUST00000032429	ENSMUSG00000030291	ENSMUSG00000030291.12	ENSMUST00000032429.8	MED21	ENSG00000152944	ENSP00000282892	1	0.0099	0.3056	100	95.8333	95.8333	ortholog_one2one	NM_025315	Dazl.target
Med23	ENSMUST00000020159	ENSMUSG00000019984	ENSMUSG00000019984.16	ENSMUST00000020159.14	MED23	ENSG00000112282	ENSP00000357047	1	0.0188	0.5643	75	96.1988	95.6395	ortholog_one2one	NM_027347	Dazl.target
Med24	ENSMUST00000017354	ENSMUSG00000017210	ENSMUSG00000017210.14	ENSMUST00000017354.12	MED24	ENSG00000008838	ENSP00000440100	1	0.0284	0.6328	100	88.4921	90.3749	ortholog_one2one	NM_001361995	Dazl.target
Med28	ENSMUST00000156481	ENSMUSG00000015804	ENSMUSG00000015804.14	ENSMUST00000156481.7	MED28	ENSG00000118579	ENSP00000237380	1	0.0232	0.6294	100	93.2584	93.2584	ortholog_one2one	NM_025895	Dazl.target
Med31	ENSMUST00000021157	ENSMUSG00000020801	ENSMUSG00000020801.8	ENSMUST00000021157.8	MED31	ENSG00000108590	ENSP00000225728	1	0.0109	0.3589	100	97.7099	97.7099	ortholog_one2one	NM_026068	Dazl.target
Med7	ENSMUST00000109232	ENSMUSG00000020397	ENSMUSG00000020397.15	ENSMUST00000109232.3	MED7	ENSG00000155868	ENSP00000286317	1	0.014	0.4217	75	96.9957	96.9957	ortholog_one2one	NM_025426	Dazl.target
Men1	ENSMUST00000078137	ENSMUSG00000024947	ENSMUSG00000024947.17	ENSMUST00000078137.11	MEN1	ENSG00000133895	ENSP00000337088	1	0.0178	0.6482	100	95.6098	95.2998	ortholog_one2one	NM_001168490	Dazl.target
Metap2	ENSMUST00000180840	ENSMUSG00000036112	ENSMUSG00000036112.15	ENSMUST00000180840.7	METAP2	ENSG00000111142	ENSP00000325312	1	0.0272	0.5008	100	94.7699	94.7699	ortholog_one2one	NM_019648	Dazl.target
Mettl8	ENSMUST00000112186	ENSMUSG00000041975	ENSMUSG00000041975.17	ENSMUST00000112186.8	METTL8	ENSG00000123600	ENSP00000480056	1	0.1518	0.4938	100	71.9902	75.5155	ortholog_one2one	NM_145524	Dazl.target
Mex3c	ENSMUST00000091852	ENSMUSG00000037253	ENSMUSG00000037253.8	ENSMUST00000091852.4	MEX3C	ENSG00000176624	ENSP00000385610	1	0.022	0.2612	100	93.6267	94.6319	ortholog_one2one	NM_001039214	Dazl.target
Mex3d	ENSMUST00000105350	ENSMUSG00000048696	ENSMUSG00000048696.11	ENSMUST00000105350.2	MEX3D	ENSG00000181588	ENSP00000384398	1	0.1293	1.7156	100	74.808	67.8273	ortholog_one2one	NM_198615	Dazl.target
Mfn1	ENSMUST00000091257	ENSMUSG00000027668	ENSMUSG00000027668.13	ENSMUST00000091257.10	MFN1	ENSG00000171109	ENSP00000420617	1	0.0469	0.5668	100	90.5533	90.5533	ortholog_one2one	NM_024200	Dazl.target
Mga	ENSMUST00000110774	ENSMUSG00000033943	ENSMUSG00000033943.15	ENSMUST00000110774.7	MGA	ENSG00000174197	ENSP00000219905	1	0.0935	0.3444	100	82.2186	82.8402	ortholog_one2one	NM_013720	Dazl.target
Mgme1	ENSMUST00000110027	ENSMUSG00000027424	ENSMUSG00000027424.11	ENSMUST00000110027.1	MGME1	ENSG00000125871	ENSP00000366939	1	0.1823	0.4717	75	69.4767	70.7101	ortholog_one2one	NM_001289630	Dazl.target
Mical3	ENSMUST00000207889	ENSMUSG00000051586	ENSMUSG00000051586.17	ENSMUST00000207889.1	MICAL3	ENSG00000243156	ENSP00000416015	1	0.0691	0.7404	100	86.4635	86.854	ortholog_one2one	NM_001270475	Dazl.target
Midn	ENSMUST00000099492	ENSMUSG00000035621	ENSMUSG00000035621.13	ENSMUST00000099492.9	MIDN	ENSG00000167470	ENSP00000300952	1	0.0281	1.2797	100	92.735	85.4331	ortholog_one2one	NM_001305798	Dazl.target
Mier1	ENSMUST00000106858	ENSMUSG00000028522	ENSMUSG00000028522.16	ENSMUST00000106858.7	MIER1	ENSG00000198160	ENSP00000383820	1	0.051	0.6095	100	85.3097	86.6907	ortholog_one2one	NM_027696	Dazl.target
Mier3	ENSMUST00000109272	ENSMUSG00000032727	ENSMUSG00000032727.14	ENSMUST00000109272.8	MIER3	ENSG00000155545	ENSP00000370624	1	0.0332	0.5587	75	92.2523	92.922	ortholog_one2one	NM_172593	Dazl.target
Mif	ENSMUST00000038169	ENSMUSG00000033307	ENSMUSG00000033307.7	ENSMUST00000038169.7	MIF	ENSG00000240972	ENSP00000215754	1	NA	NA	100	89.5652	89.5652	ortholog_one2one	NM_010798	Dazl.target
Mif4gd	ENSMUST00000106506	ENSMUSG00000020743	ENSMUSG00000020743.15	ENSMUST00000106506.7	MIF4GD	ENSG00000125457	ENSP00000463334	1	0.0325	0.3929	100	78.7072	93.2432	ortholog_one2one	NM_001243587	Dazl.target
Minpp1	ENSMUST00000025827	ENSMUSG00000024896	ENSMUSG00000024896.9	ENSMUST00000025827.9	MINPP1	ENSG00000107789	ENSP00000361064	1	0.0965	0.6639	50	82.1355	83.1601	ortholog_one2one	NM_010799	Dazl.target
Mis18a	ENSMUST00000099554	ENSMUSG00000022978	ENSMUSG00000022978.11	ENSMUST00000099554.4	MIS18A	ENSG00000159055	ENSP00000290130	1	0.1346	0.7773	100	66.5236	75.9804	ortholog_one2one	NM_025642	Dazl.target
Mis18bp1	ENSMUST00000052201	ENSMUSG00000047534	ENSMUSG00000047534.17	ENSMUST00000052201.8	MIS18BP1	ENSG00000129534	ENSP00000309790	0	0.301	0.5809	100	49.3816	56.012	ortholog_one2one	NM_172578	Dazl.target
Mknk2	ENSMUST00000200082	ENSMUSG00000020190	ENSMUSG00000020190.13	ENSMUST00000200082.4	MKNK2	ENSG00000099875	ENSP00000250896	1	0.0322	0.9249	100	92.2581	93.4641	ortholog_one2one	NM_021462	Dazl.target
Mlf1	ENSMUST00000077916	ENSMUSG00000048416	ENSMUSG00000048416.15	ENSMUST00000077916.11	MLF1	ENSG00000178053	ENSP00000376568	1	0.1383	0.5572	100	71.5719	75.8865	ortholog_one2one	NM_010801	Dazl.target
Mllt10	ENSMUST00000114671	ENSMUSG00000026743	ENSMUSG00000026743.16	ENSMUST00000114671.7	MLLT10	ENSG00000078403	ENSP00000307411	1	0.033	0.3418	100	93.0712	93.0712	ortholog_one2one	NM_001252561	Dazl.target
Mllt6	ENSMUST00000044730	ENSMUSG00000038437	ENSMUSG00000038437.11	ENSMUST00000044730.11	MLLT6	ENSG00000275023	ENSP00000479910	1	0.0389	0.4649	100	90.1189	91.2882	ortholog_one2one	NM_139311	Dazl.target
Mob1a	ENSMUST00000055261	ENSMUSG00000043131	ENSMUSG00000043131.14	ENSMUST00000055261.10	MOB1A	ENSG00000114978	ENSP00000379364	1	0	0	100	100	100	ortholog_one2one	NM_145571	Dazl.target
Mob1b	ENSMUST00000006424	ENSMUSG00000006262	ENSMUSG00000006262.15	ENSMUST00000006424.7	MOB1B	ENSG00000173542	ENSP00000379366	1	0.017	0.4946	100	95.4751	97.6852	ortholog_one2one	NM_026735	Dazl.target
Mob2	ENSMUST00000211206	ENSMUSG00000025147	ENSMUSG00000025147.7	ENSMUST00000211206.1	MOB2	ENSG00000182208	ENSP00000328694	1	0.0534	0.9422	75	79.1045	90.2128	ortholog_one2one	NM_001347560	Dazl.target
Mob4	ENSMUST00000162364	ENSMUSG00000025979	ENSMUSG00000025979.13	ENSMUST00000162364.7	MOB4	ENSG00000115540	ENSP00000315702	1	0	0	100	100	100	ortholog_one2one	NM_025283	Dazl.target
Morc3	ENSMUST00000202261	ENSMUSG00000039456	ENSMUSG00000039456.10	ENSMUST00000202261.4	MORC3	ENSG00000159256	ENSP00000383333	1	0.0923	0.7062	100	82.9606	82.6964	ortholog_one2one	NM_001045529	Dazl.target
Morf4l2	ENSMUST00000080411	ENSMUSG00000031422	ENSMUSG00000031422.16	ENSMUST00000080411.12	MORF4L2	ENSG00000123562	ENSP00000394417	1	0.0219	0.671	75	95.1389	95.1389	ortholog_one2one	NM_001168226	Dazl.target
Mpdz	ENSMUST00000107258	ENSMUSG00000028402	ENSMUSG00000028402.18	ENSMUST00000107258.8	MPDZ	ENSG00000107186	ENSP00000320006	1	0.0906	0.5864	100	83.43	84.0389	ortholog_one2one	NM_001305286	Dazl.target
Mphosph6	ENSMUST00000034303	ENSMUSG00000031843	ENSMUSG00000031843.2	ENSMUST00000034303.2	MPHOSPH6	ENSG00000135698	ENSP00000258169	1	0.0668	1.4883	100	86.25	85.7143	ortholog_one2one	NM_026758	Dazl.target
Mphosph8	ENSMUST00000116468	ENSMUSG00000079184	ENSMUSG00000079184.10	ENSMUST00000116468.1	MPHOSPH8	ENSG00000196199	ENSP00000355388	1	0.1442	0.7584	50	76.6279	76.8065	ortholog_one2one	NM_023773	Dazl.target
Mpp5	ENSMUST00000082024	ENSMUSG00000021112	ENSMUSG00000021112.9	ENSMUST00000082024.6	MPP5	ENSG00000072415	ENSP00000261681	1	0.015	0.3856	100	96.7407	96.7407	ortholog_one2one	NM_019579	Dazl.target
Mpzl1	ENSMUST00000068705	ENSMUSG00000026566	ENSMUSG00000026566.15	ENSMUST00000068705.12	MPZL1	ENSG00000197965	ENSP00000352513	1	0.0914	0.4395	100	83.2714	82.963	ortholog_one2one	NM_001001880	Dazl.target
Mrgbp	ENSMUST00000169630	ENSMUSG00000027569	ENSMUSG00000027569.15	ENSMUST00000169630.7	MRGBP	ENSG00000101189	ENSP00000359518	1	0.0173	0.4656	100	96.5686	96.5686	ortholog_one2one	NM_028479	Dazl.target
Mrpl17	ENSMUST00000124482	ENSMUSG00000030879	ENSMUSG00000030879.10	ENSMUST00000124482.2	MRPL17	ENSG00000158042	ENSP00000288937	1	0.0915	0.4858	100	84.5714	84.0909	ortholog_one2one	NM_025301	Dazl.target
Mrpl3	ENSMUST00000035177	ENSMUSG00000032563	ENSMUSG00000032563.16	ENSMUST00000035177.14	MRPL3	ENSG00000114686	ENSP00000264995	1	0.1085	0.5025	100	82.1839	82.1839	ortholog_one2one	NM_053159	Dazl.target
Mrpl44	ENSMUST00000027464	ENSMUSG00000026248	ENSMUSG00000026248.9	ENSMUST00000027464.8	MRPL44	ENSG00000135900	ENSP00000258383	1	0.0853	0.6664	100	85.8434	85.5856	ortholog_one2one	NM_001081210	Dazl.target
Mrpl50	ENSMUST00000057829	ENSMUSG00000044018	ENSMUSG00000044018.3	ENSMUST00000057829.3	MRPL50	ENSG00000136897	ENSP00000363999	1	0.1515	0.5596	100	76.5823	76.1006	ortholog_one2one	NM_178603	Dazl.target
Mrps16	ENSMUST00000061444	ENSMUSG00000049960	ENSMUSG00000049960.4	ENSMUST00000061444.4	MRPS16	ENSG00000182180	ENSP00000362036	1	0.0423	0.732	100	89.781	91.1111	ortholog_one2one	NM_025440	Dazl.target
Mrps23	ENSMUST00000118784	ENSMUSG00000023723	ENSMUSG00000023723.17	ENSMUST00000118784.7	MRPS23	ENSG00000181610	ENSP00000320184	1	0.1563	0.6691	100	69.4737	74.5763	ortholog_one2one	NM_001291272	Dazl.target
Mrps9	ENSMUST00000057208	ENSMUSG00000060679	ENSMUSG00000060679.14	ENSMUST00000057208.12	MRPS9	ENSG00000135972	ENSP00000258455	1	0.1299	0.6238	100	77.0202	78.2051	ortholog_one2one	NM_023514	Dazl.target
Msantd2	ENSMUST00000048604	ENSMUSG00000042138	ENSMUSG00000042138.8	ENSMUST00000048604.7	MSANTD2	ENSG00000120458	ENSP00000364118	1	0.0137	0.2358	100	97.3166	97.3166	ortholog_one2one	NM_146222	Dazl.target
Msantd3	ENSMUST00000064807	ENSMUSG00000039693	ENSMUSG00000039693.11	ENSMUST00000064807.8	MSANTD3	ENSG00000066697	ENSP00000480445	1	0.0191	0.9983	100	96.3636	96.3636	ortholog_one2one	NM_001145924	Dazl.target
Msantd4	ENSMUST00000047173	ENSMUSG00000041124	ENSMUSG00000041124.11	ENSMUST00000047173.9	MSANTD4	ENSG00000170903	ENSP00000304713	1	0.0214	1.1538	100	94.7826	94.7826	ortholog_one2one	NM_145609	Dazl.target
Msi1	ENSMUST00000150779	ENSMUSG00000054256	ENSMUSG00000054256.11	ENSMUST00000150779.7	MSI1	ENSG00000135097	ENSP00000257552	1	0.0025	0.3584	100	99.4475	99.4475	ortholog_one2one	NM_008629	Dazl.target
Msi2	ENSMUST00000107909	ENSMUSG00000069769	ENSMUSG00000069769.13	ENSMUST00000107909.7	MSI2	ENSG00000153944	ENSP00000284073	1	0.0014	0.1874	100	99.0854	93.9306	ortholog_one2one	NM_001363195	Dazl.target
Mt1	ENSMUST00000034215	ENSMUSG00000031765	ENSMUSG00000031765.8	ENSMUST00000034215.7	MT1F	ENSG00000198417	ENSP00000334872	1	0.1172	7.6799	100	81.9672	81.9672	ortholog_one2one	NM_013602	Dazl.target
Mt2	ENSMUST00000034214	ENSMUSG00000031762	ENSMUSG00000031762.7	ENSMUST00000034214.7	MT1M	ENSG00000205364	ENSP00000369146	1	0.1435	3.0343	100	72.1311	72.1311	ortholog_one2one	NM_008630	Dazl.target
Mta1	ENSMUST00000109723	ENSMUSG00000021144	ENSMUSG00000021144.14	ENSMUST00000109723.7	MTA1	ENSG00000182979	ENSP00000333633	1	0.0158	0.5949	100	95.3846	97.0128	ortholog_one2one	NM_001346696	Dazl.target
Mta3	ENSMUST00000112350	ENSMUSG00000055817	ENSMUSG00000055817.18	ENSMUST00000112350.7	MTA3	ENSG00000057935	ENSP00000385823	1	0.0351	0.6311	100	93.0976	93.5702	ortholog_one2one	NM_001171054	Dazl.target
Mtf1	ENSMUST00000030723	ENSMUSG00000028890	ENSMUSG00000028890.13	ENSMUST00000030723.2	MTF1	ENSG00000188786	ENSP00000362127	1	0.0396	0.2606	100	82.3373	91.8519	ortholog_one2one	NM_008636	Dazl.target
Mtf2	ENSMUST00000081567	ENSMUSG00000029267	ENSMUSG00000029267.17	ENSMUST00000081567.10	MTF2	ENSG00000143033	ENSP00000359321	1	0.0105	0.1711	100	97.6391	97.6391	ortholog_one2one	NM_001253877	Dazl.target
Mthfd2	ENSMUST00000005810	ENSMUSG00000005667	ENSMUSG00000005667.8	ENSMUST00000005810.8	MTHFD2	ENSG00000065911	ENSP00000377617	1	0.0433	0.6223	75	91.7143	91.7143	ortholog_one2one	NM_008638	Dazl.target
Mtmr3	ENSMUST00000109943	ENSMUSG00000034354	ENSMUSG00000034354.17	ENSMUST00000109943.9	MTMR3	ENSG00000100330	ENSP00000384651	1	0.0696	0.4065	100	84.4741	87.3167	ortholog_one2one	NM_028860	Dazl.target
Mtmr6	ENSMUST00000022563	ENSMUSG00000021987	ENSMUSG00000021987.9	ENSMUST00000022563.8	MTMR6	ENSG00000139505	ENSP00000371221	1	0.0478	0.6121	50	89.8551	90.4376	ortholog_one2one	NM_144843	Dazl.target
Mtpn	ENSMUST00000031866	ENSMUSG00000029840	ENSMUSG00000029840.8	ENSMUST00000031866.8	MTPN	ENSG00000105887	ENSP00000376800	1	0.0043	0.0748	100	99.1525	99.1525	ortholog_one2one	NM_008098	Dazl.target
Mtr	ENSMUST00000099856	ENSMUSG00000021311	ENSMUSG00000021311.9	ENSMUST00000099856.5	MTR	ENSG00000116984	ENSP00000355536	1	0.0422	0.4376	100	91.1462	92.0192	ortholog_one2one	NM_001081128	Dazl.target
Mtss1	ENSMUST00000080371	ENSMUSG00000022353	ENSMUSG00000022353.10	ENSMUST00000080371.7	MTSS1	ENSG00000170873	ENSP00000322804	1	0.0171	0.4588	100	96.5744	96.5744	ortholog_one2one	NM_144800	Dazl.target
Mtx2	ENSMUST00000028511	ENSMUSG00000027099	ENSMUSG00000027099.9	ENSMUST00000028511.7	MTX2	ENSG00000128654	ENSP00000249442	1	0.0158	0.334	100	96.9582	96.9582	ortholog_one2one	NM_016804	Dazl.target
Mycbp2	ENSMUST00000159855	ENSMUSG00000033004	ENSMUSG00000033004.15	ENSMUST00000159855.7	MYCBP2	ENSG00000005810	ENSP00000444596	1	0.0134	0.478	100	96.9859	95.5963	ortholog_one2one	NM_207215	Dazl.target
Mycl	ENSMUST00000106252	ENSMUSG00000028654	ENSMUSG00000028654.13	ENSMUST00000106252.8	MYCL	ENSG00000116990	ENSP00000380494	1	0.0522	0.6084	100	82.9949	88.8587	ortholog_one2one	NM_001303121	Dazl.target
Myl12a	ENSMUST00000148960	ENSMUSG00000024048	ENSMUSG00000024048.15	ENSMUST00000148960.7	MYL12A	ENSG00000101608	ENSP00000464359	1	0.0078	1.3541	100	94.9153	97.6744	ortholog_one2one	NM_026064	Dazl.target
Mynn	ENSMUST00000192715	ENSMUSG00000037730	ENSMUSG00000037730.13	ENSMUST00000192715.5	MYNN	ENSG00000085274	ENSP00000326240	1	0.0417	0.4823	100	91.9672	91.9672	ortholog_one2one	NM_030557	Dazl.target
Myo10	ENSMUST00000110457	ENSMUSG00000022272	ENSMUSG00000022272.17	ENSMUST00000110457.7	MYO10	ENSG00000145555	ENSP00000421280	1	0.025	0.7884	75	94.6064	94.4229	ortholog_one2one	NM_019472	Dazl.target
Myo1b	ENSMUST00000018561	ENSMUSG00000018417	ENSMUSG00000018417.14	ENSMUST00000018561.13	MYO1B	ENSG00000128641	ENSP00000376132	1	0.0103	0.5375	100	97.8873	97.8873	ortholog_one2one	NM_001161817	Dazl.target
Myo1h	ENSMUST00000202006	ENSMUSG00000066952	ENSMUSG00000066952.11	ENSMUST00000202006.3	MYO1H	ENSG00000174527	ENSP00000444076	1	0.0653	0.8472	100	87.8669	87.8669	ortholog_one2one	NM_001164573	Dazl.target
Myo9a	ENSMUST00000136740	ENSMUSG00000039585	ENSMUSG00000039585.15	ENSMUST00000136740.7	MYO9A	ENSG00000066933	ENSP00000348349	1	0.0543	0.3765	100	88.9717	86.165	ortholog_one2one	NM_173018	Dazl.target
Mzt1	ENSMUST00000042662	ENSMUSG00000033186	ENSMUSG00000033186.9	ENSMUST00000042662.9	MZT1	ENSG00000204899	ENSP00000367049	1	0.0916	0.5151	100	80.4878	84.6154	ortholog_one2one	NM_175245	Dazl.target
N4bp1	ENSMUST00000034074	ENSMUSG00000031652	ENSMUSG00000031652.11	ENSMUST00000034074.7	N4BP1	ENSG00000102921	ENSP00000262384	1	0.1031	0.5222	100	81.1384	81.411	ortholog_one2one	NM_030563	Dazl.target
Naa15	ENSMUST00000029303	ENSMUSG00000063273	ENSMUSG00000063273.11	ENSMUST00000029303.12	NAA15	ENSG00000164134	ENSP00000296543	1	0.0073	0.325	100	98.3834	98.4971	ortholog_one2one	NM_053089	Dazl.target
Naa30	ENSMUST00000153488	ENSMUSG00000036282	ENSMUSG00000036282.15	ENSMUST00000153488.8	NAA30	ENSG00000139977	ENSP00000452521	1	0.0702	0.2868	100	85.6354	85.1648	ortholog_one2one	NM_027492	Dazl.target
Naa35	ENSMUST00000022038	ENSMUSG00000021555	ENSMUSG00000021555.15	ENSMUST00000022038.14	NAA35	ENSG00000135040	ENSP00000354972	1	0.0122	0.5832	100	97.3793	97.3793	ortholog_one2one	NM_030153	Dazl.target
Naa40	ENSMUST00000025675	ENSMUSG00000024764	ENSMUSG00000024764.10	ENSMUST00000025675.10	NAA40	ENSG00000110583	ENSP00000367024	1	0.0054	0.5073	100	98.7342	98.7342	ortholog_one2one	NM_027643	Dazl.target
Naa50	ENSMUST00000063520	ENSMUSG00000022698	ENSMUSG00000022698.17	ENSMUST00000063520.14	NAA50	ENSG00000121579	ENSP00000240922	1	0.0083	0.3294	100	98.8166	98.8166	ortholog_one2one	NM_028108	Dazl.target
Nab1	ENSMUST00000069792	ENSMUSG00000002881	ENSMUSG00000002881.14	ENSMUST00000069792.13	NAB1	ENSG00000138386	ENSP00000336894	1	0.0339	0.539	100	92.6078	92.7984	ortholog_one2one	NM_008667	Dazl.target
Nab2	ENSMUST00000099157	ENSMUSG00000025402	ENSMUSG00000025402.12	ENSMUST00000099157.3	NAB2	ENSG00000166886	ENSP00000300131	1	0.023	0.4521	100	95.619	95.619	ortholog_one2one	NM_001122895	Dazl.target
Nabp1	ENSMUST00000027279	ENSMUSG00000026107	ENSMUSG00000026107.11	ENSMUST00000027279.11	NABP1	ENSG00000173559	ENSP00000403683	1	0.081	0.293	100	80.8824	83.3333	ortholog_one2one	NM_028696	Dazl.target
Nadk	ENSMUST00000105613	ENSMUSG00000029063	ENSMUSG00000029063.16	ENSMUST00000105613.9	NADK	ENSG00000008130	ENSP00000367890	1	0.0379	0.904	100	68.3587	92.0273	ortholog_one2one	NM_001159637	Dazl.target
Nae1	ENSMUST00000034349	ENSMUSG00000031878	ENSMUSG00000031878.18	ENSMUST00000034349.9	NAE1	ENSG00000159593	ENSP00000351990	1	0.0149	0.3229	100	96.4618	97.0037	ortholog_one2one	NM_144931	Dazl.target
Nampt	ENSMUST00000020886	ENSMUSG00000020572	ENSMUSG00000020572.8	ENSMUST00000020886.8	NAMPT	ENSG00000105835	ENSP00000222553	1	0.0198	0.3621	100	95.723	95.723	ortholog_one2one	NM_021524	Dazl.target
Nap1l1	ENSMUST00000065917	ENSMUSG00000058799	ENSMUSG00000058799.16	ENSMUST00000065917.15	NAP1L1	ENSG00000187109	ENSP00000477538	1	0.0079	0.3652	100	98.2097	98.2097	ortholog_one2one	NM_015781	Dazl.target
Nap1l4	ENSMUST00000208190	ENSMUSG00000059119	ENSMUSG00000059119.9	ENSMUST00000208190.1	NAP1L4	ENSG00000205531	ENSP00000369915	1	0.0272	0.9623	75	94.4	91.7098	ortholog_one2one	NM_001285489	Dazl.target
Nars2	ENSMUST00000044466	ENSMUSG00000018995	ENSMUSG00000018995.12	ENSMUST00000044466.11	NARS2	ENSG00000137513	ENSP00000281038	1	0.0811	0.4726	100	84.4864	84.4864	ortholog_one2one	NM_153591	Dazl.target
Nasp	ENSMUST00000030456	ENSMUSG00000028693	ENSMUSG00000028693.15	ENSMUST00000030456.13	NASP	ENSG00000132780	ENSP00000255120	1	0.1069	0.3299	100	80.5838	82.1475	ortholog_one2one	NM_016777	Dazl.target
Nbr1	ENSMUST00000107213	ENSMUSG00000017119	ENSMUSG00000017119.19	ENSMUST00000107213.7	NBR1	ENSG00000188554	ENSP00000343479	1	0.0835	0.3365	100	84.7826	82.8947	ortholog_one2one	NM_001252222	Dazl.target
Ncapd3	ENSMUST00000073127	ENSMUSG00000035024	ENSMUSG00000035024.16	ENSMUST00000073127.13	NCAPD3	ENSG00000151503	ENSP00000433681	1	0.1554	0.572	100	74.2991	73.9044	ortholog_one2one	NM_178113	Dazl.target
Ncapg2	ENSMUST00000084828	ENSMUSG00000042029	ENSMUSG00000042029.7	ENSMUST00000084828.4	NCAPG2	ENSG00000146918	ENSP00000387007	1	0.1133	0.5291	75	79.3253	80.58	ortholog_one2one	NM_133762	Dazl.target
Ncbp1	ENSMUST00000030014	ENSMUSG00000028330	ENSMUSG00000028330.8	ENSMUST00000030014.8	NCBP1	ENSG00000136937	ENSP00000364289	1	0.0094	0.5225	100	97.8481	97.8481	ortholog_one2one	NM_001033201	Dazl.target
Ncbp2	ENSMUST00000023460	ENSMUSG00000022774	ENSMUSG00000022774.13	ENSMUST00000023460.6	NCBP2	ENSG00000114503	ENSP00000326806	1	0.0087	0.4626	100	98.0769	98.0769	ortholog_one2one	NM_026554	Dazl.target
Ncdn	ENSMUST00000030637	ENSMUSG00000028833	ENSMUSG00000028833.13	ENSMUST00000030637.13	NCDN	ENSG00000020129	ENSP00000362340	1	0.0091	0.4514	100	98.2167	98.2167	ortholog_one2one	NM_011986	Dazl.target
Nck1	ENSMUST00000116522	ENSMUSG00000032475	ENSMUSG00000032475.15	ENSMUST00000116522.7	NCK1	ENSG00000158092	ENSP00000417273	1	0.0048	0.3484	100	98.939	98.939	ortholog_one2one	NM_010878	Dazl.target
Nck2	ENSMUST00000086421	ENSMUSG00000066877	ENSMUSG00000066877.11	ENSMUST00000086421.8	NCK2	ENSG00000071051	ENSP00000233154	1	NA	NA	100	96.0526	96.0526	ortholog_one2one	NM_010879	Dazl.target
Ncl	ENSMUST00000027438	ENSMUSG00000026234	ENSMUSG00000026234.12	ENSMUST00000027438.7	NCL	ENSG00000115053	ENSP00000318195	1	0.0828	0.4763	100	82.3944	82.744	ortholog_one2one	NM_010880	Dazl.target
Ncoa2	ENSMUST00000006037	ENSMUSG00000005886	ENSMUSG00000005886.14	ENSMUST00000006037.12	NCOA2	ENSG00000140396	ENSP00000399968	1	0.0278	0.3771	100	94.2623	94.3912	ortholog_one2one	NM_008678	Dazl.target
Ncoa6	ENSMUST00000043126	ENSMUSG00000038369	ENSMUSG00000038369.14	ENSMUST00000043126.11	NCOA6	ENSG00000198646	ENSP00000363929	1	0.0466	0.2413	75	91.1294	90.8652	ortholog_one2one	NM_019825	Dazl.target
Ncstn	ENSMUST00000003550	ENSMUSG00000003458	ENSMUSG00000003458.12	ENSMUST00000003550.10	NCSTN	ENSG00000162736	ENSP00000294785	1	0.0599	0.4482	100	88.7165	88.8418	ortholog_one2one	NM_021607	Dazl.target
Ndel1	ENSMUST00000018880	ENSMUSG00000018736	ENSMUSG00000018736.14	ENSMUST00000018880.13	NDEL1	ENSG00000166579	ENSP00000333982	1	0.0192	0.3462	100	95.942	95.942	ortholog_one2one	NM_023668	Dazl.target
Ndfip1	ENSMUST00000025293	ENSMUSG00000024425	ENSMUSG00000024425.4	ENSMUST00000025293.4	NDFIP1	ENSG00000131507	ENSP00000253814	1	0.0129	0.2591	100	97.2851	97.2851	ortholog_one2one	NM_022996	Dazl.target
Ndrg4	ENSMUST00000080666	ENSMUSG00000036564	ENSMUSG00000036564.17	ENSMUST00000080666.7	NDRG4	ENSG00000103034	ENSP00000377823	1	0.0119	0.5683	100	82.8644	92.0455	ortholog_one2one	NM_145602	Dazl.target
Ndufa6	ENSMUST00000023085	ENSMUSG00000022450	ENSMUSG00000022450.6	ENSMUST00000023085.6	NDUFA6	ENSG00000184983	ENSP00000482543	1	0.0853	0.4486	75	72.0779	84.7328	ortholog_one2one	NM_025987	Dazl.target
Ndufaf4	ENSMUST00000029925	ENSMUSG00000028261	ENSMUSG00000028261.13	ENSMUST00000029925.9	NDUFAF4	ENSG00000123545	ENSP00000358272	1	0.1743	0.5397	100	72	72.8324	ortholog_one2one	NM_026742	Dazl.target
Ndufb4	ENSMUST00000023514	ENSMUSG00000022820	ENSMUSG00000022820.4	ENSMUST00000023514.3	NDUFB4	ENSG00000065518	ENSP00000184266	1	0.179	0.563	100	75.1938	75.1938	ortholog_one2one	NM_026610	Dazl.target
Ndufb9	ENSMUST00000022980	ENSMUSG00000022354	ENSMUSG00000022354.4	ENSMUST00000022980.4	NDUFB9	ENSG00000147684	ENSP00000276689	1	0.0802	0.4361	100	86.5922	86.5922	ortholog_one2one	NM_023172	Dazl.target
Ndufs1	ENSMUST00000027111	ENSMUSG00000025968	ENSMUSG00000025968.16	ENSMUST00000027111.14	NDUFS1	ENSG00000023228	ENSP00000392709	1	0.0279	0.3607	100	92.3077	94.0853	ortholog_one2one	NM_001160039	Dazl.target
Necap1	ENSMUST00000032477	ENSMUSG00000030327	ENSMUSG00000030327.8	ENSMUST00000032477.5	NECAP1	ENSG00000089818	ENSP00000491067	1	0.0351	0.3618	75	94.1818	94.1818	ortholog_one2one	NM_026267	Dazl.target
Nectin3	ENSMUST00000023334	ENSMUSG00000022656	ENSMUSG00000022656.15	ENSMUST00000023334.14	NECTIN3	ENSG00000177707	ENSP00000418070	1	0.0326	0.3381	100	92.8962	92.8962	ortholog_one2one	NM_021495	Dazl.target
Nedd4	ENSMUST00000034740	ENSMUSG00000032216	ENSMUSG00000032216.15	ENSMUST00000034740.14	NEDD4	ENSG00000069869	ENSP00000424827	1	0.166	0.887	100	50.9477	75.761	ortholog_one2one	NM_010890	Dazl.target
Nedd8	ENSMUST00000163750	ENSMUSG00000010376	ENSMUSG00000010376.15	ENSMUST00000163750.7	NEDD8	ENSG00000129559	ENSP00000250495	1	0.0056	0.3759	100	98.7654	98.7654	ortholog_one2one	NM_008683	Dazl.target
Neil2	ENSMUST00000038229	ENSMUSG00000035121	ENSMUSG00000035121.6	ENSMUST00000038229.4	NEIL2	ENSG00000154328	ENSP00000284503	1	0.1732	0.5743	100	73.1928	73.8602	ortholog_one2one	NM_201610	Dazl.target
Nek1	ENSMUST00000034065	ENSMUSG00000031644	ENSMUSG00000031644.19	ENSMUST00000034065.13	NEK1	ENSG00000137601	ENSP00000424757	1	0.0906	0.4755	100	81.8818	82.5882	ortholog_one2one	NM_175089	Dazl.target
Nek7	ENSMUST00000186017	ENSMUSG00000026393	ENSMUSG00000026393.10	ENSMUST00000186017.6	NEK7	ENSG00000151414	ENSP00000356355	1	0.0108	0.3942	100	97.6821	97.6821	ortholog_one2one	NM_021605	Dazl.target
Nek9	ENSMUST00000040992	ENSMUSG00000034290	ENSMUSG00000034290.9	ENSMUST00000040992.7	NEK9	ENSG00000119638	ENSP00000238616	1	0.0219	0.371	100	95.6078	95.1219	ortholog_one2one	NM_145138	Dazl.target
Nelfa	ENSMUST00000030993	ENSMUSG00000029111	ENSMUSG00000029111.7	ENSMUST00000030993.7	NELFA	ENSG00000185049	ENSP00000445757	1	0.0212	1.276	100	93.5065	95.0943	ortholog_one2one	NM_011914	Dazl.target
Nelfb	ENSMUST00000059849	ENSMUSG00000013465	ENSMUSG00000013465.19	ENSMUST00000059849.14	NELFB	ENSG00000188986	ENSP00000339495	1	0.0284	1.4279	100	94.1083	93.6609	ortholog_one2one	NM_021393	Dazl.target
Nfat5	ENSMUST00000077440	ENSMUSG00000003847	ENSMUSG00000003847.16	ENSMUST00000077440.12	NFAT5	ENSG00000102908	ENSP00000338806	1	0.0376	0.2958	100	92.3822	92.2036	ortholog_one2one	NM_133957	Dazl.target
Nfatc2ip	ENSMUST00000075671	ENSMUSG00000030722	ENSMUSG00000030722.7	ENSMUST00000075671.4	NFATC2IP	ENSG00000176953	ENSP00000324792	1	0.1979	0.5822	100	68.4964	69.6602	ortholog_one2one	NM_010900	Dazl.target
Nfatc3	ENSMUST00000109308	ENSMUSG00000031902	ENSMUSG00000031902.10	ENSMUST00000109308.2	NFATC3	ENSG00000072736	ENSP00000300659	1	0.0584	0.3199	100	89.0233	88.9405	ortholog_one2one	NM_010901	Dazl.target
Nfe2l1	ENSMUST00000081775	ENSMUSG00000038615	ENSMUSG00000038615.17	ENSMUST00000081775.11	NFE2L1	ENSG00000082641	ENSP00000354855	1	0.0121	0.4272	100	93.3938	97.3009	ortholog_one2one	NM_008686	Dazl.target
Nfxl1	ENSMUST00000087216	ENSMUSG00000072889	ENSMUSG00000072889.9	ENSMUST00000087216.11	NFXL1	ENSG00000170448	ENSP00000422037	1	0.0517	0.4735	50	89.6817	88.9978	ortholog_one2one	NM_133921	Dazl.target
Nfya	ENSMUST00000162460	ENSMUSG00000023994	ENSMUSG00000023994.13	ENSMUST00000162460.7	NFYA	ENSG00000001167	ENSP00000345702	1	0.0014	0.4016	100	99.7118	99.7118	ortholog_one2one	NM_010913	Dazl.target
Nfyb	ENSMUST00000130911	ENSMUSG00000020248	ENSMUSG00000020248.18	ENSMUST00000130911.7	NFYB	ENSG00000120837	ENSP00000240055	1	0.0045	0.7971	100	99.0338	99.0338	ortholog_one2one	NM_010914	Dazl.target
Nid1	ENSMUST00000005532	ENSMUSG00000005397	ENSMUSG00000005397.8	ENSMUST00000005532.8	NID1	ENSG00000116962	ENSP00000264187	1	0.0805	0.6214	75	85.1644	85.3012	ortholog_one2one	NM_010917	Dazl.target
Nif3l1	ENSMUST00000171597	ENSMUSG00000026036	ENSMUSG00000026036.17	ENSMUST00000171597.1	NIF3L1	ENSG00000196290	ENSP00000498853	1	0.0954	0.3999	100	83.5544	83.7766	ortholog_one2one	NM_022988	Dazl.target
Nifk	ENSMUST00000027626	ENSMUSG00000026377	ENSMUSG00000026377.12	ENSMUST00000027626.12	NIFK	ENSG00000155438	ENSP00000285814	1	0.3262	1.0268	75	58.7031	54.2587	ortholog_one2one	NM_026472	Dazl.target
Ninl	ENSMUST00000109896	ENSMUSG00000068115	ENSMUSG00000068115.13	ENSMUST00000109896.7	NINL	ENSG00000101004	ENSP00000278886	1	0.2635	0.9252	75	60.7815	60.2583	ortholog_one2one	NM_207204	Dazl.target
Nip7	ENSMUST00000034392	ENSMUSG00000031917	ENSMUSG00000031917.12	ENSMUST00000034392.12	NIP7	ENSG00000132603	ENSP00000254940	1	0.0099	0.8366	75	97.7778	97.7778	ortholog_one2one	NM_025391	Dazl.target
Nipa1	ENSMUST00000052204	ENSMUSG00000047037	ENSMUSG00000047037.5	ENSMUST00000052204.5	NIPA1	ENSG00000170113	ENSP00000337452	1	0.0072	0.514	50	96.9605	98.7616	ortholog_one2one	NM_153578	Dazl.target
Nipa2	ENSMUST00000032635	ENSMUSG00000030452	ENSMUSG00000030452.16	ENSMUST00000032635.13	NIPA2	ENSG00000140157	ENSP00000337618	1	0.0224	0.3853	75	95	95.2646	ortholog_one2one	NM_001256130	Dazl.target
Nipbl	ENSMUST00000052965	ENSMUSG00000022141	ENSMUSG00000022141.7	ENSMUST00000052965.7	NIPBL	ENSG00000164190	ENSP00000282516	1	0.0146	0.338	100	96.6833	96.8906	ortholog_one2one	NM_027707	Dazl.target
Nisch	ENSMUST00000022469	ENSMUSG00000021910	ENSMUSG00000021910.15	ENSMUST00000022469.12	NISCH	ENSG00000010322	ENSP00000418232	1	0.0563	0.7582	100	88.5638	83.6158	ortholog_one2one	NM_022656	Dazl.target
[truncated: 10,129 more rows]
