# Supplementary material for: DAZL mediates a broad translational program regulating expansion and differentiation of spermatogonial progenitors
Source: eLife journal article supplement (doi:10.7554/elife.56523), 2020-07-20
Supplement: supp [file elife-56523-supp-v1.zip › elife_poa_e56523_Figure_3_source_data_5.xlsx]

## Sheet: Description
Figure 3 - source data 5
Tab Name	Description
Haploinsufficiency scores	Haploinsufficiency scores ("Probability") for genes expressed in undifferentiated spermatogonia. Scores are for human genes calculated by Huang et al. (2010).
ExAC data	ExAC data for gene expressed in undifferentiated spermatogonia. ExAC data is from release 0.3.1.
Mean Pct, all genes	Mean miRNA PCT scores for all mouse genes, calculated from TargetScan data
Mean Pct, gonia	Mean miRNA PCT scores for genes expressed in undifferentiated spermatogonia

## Sheet: Haploinsufficiency scores
Human.gene.name	Mouse.gene.name	Probability	Other	DAZL.target
A2M	A2m	0.264	33.7%	Nontarget
A4GALT	A4galt	0.088	78.1%	Nontarget
AAAS	Aaas	0.619	10.9%	Nontarget
AACS	Aacs	0.159	51.7%	Nontarget
AAK1	Aak1	0.085	79.7%	Nontarget
AAMP	Aamp	0.423	19.6%	DAZL.target
AARS	Aars	0.316	27.9%	Nontarget
AARS2	Aars2	0.124	63.0%	Nontarget
AASDH	Aasdh	0.065	88.3%	Nontarget
AASDHPPT	Aasdhppt	0.203	42.6%	DAZL.target
AATF	Aatf	0.686	8.8%	Nontarget
ABAT	Abat	0.369	23.6%	Nontarget
ABCA1	Abca1	0.628	10.6%	DAZL.target
ABCA13	Abca13	0.091	76.7%	Nontarget
ABCA2	Abca2	0.309	28.5%	Nontarget
ABCA3	Abca3	0.117	65.8%	Nontarget
ABCA5	Abca5	0.131	60.6%	Nontarget
ABCA6	Abca6	0.041	96.1%	Nontarget
ABCA7	Abca7	0.048	94.3%	Nontarget
ABCA8	Abca8b	0.049	94.0%	Nontarget
ABCB10	Abcb10	0.22	39.6%	Nontarget
ABCB6	Abcb6	0.107	69.7%	Nontarget
ABCB7	Abcb7	0.364	23.9%	Nontarget
ABCB8	Abcb8	0.157	52.5%	Nontarget
ABCB9	Abcb9	0.237	37.3%	Nontarget
ABCC1	Abcc1	0.201	42.8%	Nontarget
ABCC10	Abcc10	0.037	96.9%	Nontarget
ABCC3	Abcc3	0.101	72.4%	Nontarget
ABCC4	Abcc4	0.146	55.3%	Nontarget
ABCC5	Abcc5	0.313	28.2%	DAZL.target
ABCC8	Abcc8	0.123	63.5%	Nontarget
ABCD1	Abcd1	0.376	23.0%	Nontarget
ABCD2	Abcd2	0.077	83.2%	Nontarget
ABCD3	Abcd3	0.607	11.3%	DAZL.target
ABCD4	Abcd4	0.116	66.1%	Nontarget
ABCE1	Abce1	0.479	16.6%	Nontarget
ABCF1	Abcf1	0.125	62.7%	Nontarget
ABCF3	Abcf3	0.53	14.2%	Nontarget
ABCG1	Abcg1	0.082	81.2%	Nontarget
ABHD10	Abhd10	0.059	90.9%	Nontarget
ABHD11	Abhd11	0.052	93.1%	Nontarget
ABHD12	Abhd12	0.059	90.8%	Nontarget
ABHD13	Abhd13	0.089	77.7%	Nontarget
ABHD14A	Abhd14a	0.041	96.1%	Nontarget
ABHD2	Abhd2	0.154	53.0%	DAZL.target
ABHD3	Abhd3	0.516	14.9%	Nontarget
ABHD4	Abhd4	0.262	33.9%	Nontarget
ABHD5	Abhd5	0.083	80.5%	Nontarget
ABHD6	Abhd6	0.042	96.0%	Nontarget
ABHD8	Abhd8	0.208	41.7%	Nontarget
ABI1	Abi1	0.436	18.9%	DAZL.target
ABI2	Abi2	0.421	19.8%	Nontarget
ABI3	Abi3	0.238	37.0%	Nontarget
ABI3BP	Abi3bp	0.152	53.5%	Nontarget
ABL1	Abl1	0.995	0.6%	DAZL.target
ABL2	Abl2	0.856	4.5%	DAZL.target
ABLIM1	Ablim1	0.241	36.6%	Nontarget
ABLIM3	Ablim3	0.4	21.2%	Nontarget
ABR	Abr	0.502	15.5%	Nontarget
ABT1	Abt1	0.296	29.8%	Nontarget
ABTB1	Abtb1	0.131	60.5%	Nontarget
ABTB2	Abtb2	0.353	24.7%	Nontarget
ACAA2	Acaa2	0.154	53.1%	Nontarget
ACACA	Acaca	0.42	19.9%	Nontarget
ACACB	Acacb	0.133	59.6%	Nontarget
ACAD8	Acad8	0.02	99.2%	Nontarget
ACAD9	Acad9	0.087	78.6%	Nontarget
ACADL	Acadl	0.059	90.7%	Nontarget
ACADM	Acadm	0.134	59.3%	DAZL.target
ACADS	Acads	0.183	46.5%	Nontarget
ACADSB	Acadsb	0.429	19.3%	Nontarget
ACADVL	Acadvl	0.08	81.9%	Nontarget
ACAN	Acan	0.308	28.6%	Nontarget
ACAT1	Acat1	0.32	27.6%	Nontarget
ACBD3	Acbd3	0.243	36.4%	DAZL.target
ACBD4	Acbd4	0.07	86.5%	Nontarget
ACBD5	Acbd5	0.135	59.0%	Nontarget
ACBD6	Acbd6	0.39	21.9%	Nontarget
ACBD7	Acbd7	0.078	83.0%	Nontarget
ACCS	Accs	0.094	75.2%	Nontarget
ACD	Acd	0.136	58.5%	Nontarget
ACE	Ace	0.769	6.6%	Nontarget
ACIN1	Acin1	0.655	9.7%	Nontarget
ACLY	Acly	0.633	10.4%	DAZL.target
ACMSD	Acmsd	0.133	59.9%	Nontarget
ACO1	Aco1	0.207	41.8%	DAZL.target
ACO2	Aco2	0.39	21.9%	DAZL.target
ACOT11	Acot11	0.088	78.1%	Nontarget
ACOT6	Acot6	0.095	75.1%	Nontarget
ACOT7	Acot7	0.064	88.7%	Nontarget
ACOT8	Acot8	0.183	46.4%	Nontarget
ACOX1	Acox1	0.14	57.4%	Nontarget
ACOX3	Acox3	0.09	77.1%	Nontarget
ACP2	Acp2	0.145	55.6%	Nontarget
ACP5	Acp5	0.131	60.5%	Nontarget
ACP6	Acp6	0.085	79.4%	Nontarget
ACPP	Acpp	0.148	54.7%	Nontarget
ACR	Acr	0.154	53.2%	Nontarget
ACRBP	Acrbp	0.45	18.1%	Nontarget
ACSBG1	Acsbg1	0.08	82.0%	Nontarget
ACSBG2	Acsbg2	0.106	70.3%	Nontarget
ACSF2	Acsf2	0.131	60.4%	Nontarget
ACSF3	Acsf3	0.089	77.5%	Nontarget
ACSL1	Acsl1	0.209	41.4%	DAZL.target
ACSL3	Acsl3	0.772	6.5%	DAZL.target
ACSL4	Acsl4	0.889	3.6%	Nontarget
ACSL5	Acsl5	0.126	62.2%	Nontarget
ACSS1	Acss1	0.113	67.3%	Nontarget
ACSS2	Acss2	0.369	23.6%	DAZL.target
ACTA2	Acta2	0.782	6.2%	Nontarget
ACTB	Actb	0.996	0.5%	DAZL.target
ACTG1	Actg1	0.939	2.5%	Nontarget
ACTL6A	Actl6a	0.775	6.4%	DAZL.target
ACTN1	Actn1	0.635	10.3%	DAZL.target
ACTN2	Actn2	0.715	8.0%	Nontarget
ACTN4	Actn4	0.419	20.0%	Nontarget
ACTR10	Actr10	0.181	46.8%	DAZL.target
ACTR1A	Actr1a	0.244	36.3%	Nontarget
ACTR1B	Actr1b	0.246	36.0%	Nontarget
ACTR2	Actr2	0.284	31.1%	Nontarget
ACTR3	Actr3	0.577	12.4%	Nontarget
ACTR5	Actr5	0.122	63.6%	Nontarget
ACTR6	Actr6	0.543	13.6%	DAZL.target
ACTR8	Actr8	0.552	13.2%	Nontarget
ACVR1	Acvr1	0.996	0.5%	Nontarget
ACVR1B	Acvr1b	0.896	3.5%	Nontarget
ACVR2A	Acvr2a	0.685	8.8%	Nontarget
ACVR2B	Acvr2b	0.826	5.1%	DAZL.target
ACY3	Acy3	0.126	62.4%	Nontarget
ACYP1	Acyp1	0.255	34.7%	Nontarget
ACYP2	Acyp2	0.172	48.7%	Nontarget
ADA	Ada	0.097	74.2%	Nontarget
ADAD1	Adad1	0.086	78.9%	Nontarget
ADAD2	Adad2	0.053	92.7%	Nontarget
ADAL	Adal	0.052	93.1%	DAZL.target
ADAM10	Adam10	0.986	1.0%	DAZL.target
ADAM15	Adam15	0.091	76.8%	Nontarget
ADAM17	Adam17	0.241	36.6%	Nontarget
ADAM22	Adam22	0.265	33.5%	Nontarget
ADAM23	Adam23	0.509	15.2%	Nontarget
ADAM9	Adam9	0.19	44.9%	Nontarget
ADAMTS10	Adamts10	0.243	36.4%	Nontarget
ADAMTS17	Adamts17	0.199	43.2%	Nontarget
ADAMTS19	Adamts19	0.273	32.5%	Nontarget
ADAMTS2	Adamts2	0.269	33.1%	Nontarget
ADAMTS20	Adamts20	0.128	61.5%	Nontarget
ADAMTS3	Adamts3	0.182	46.7%	Nontarget
ADAMTS4	Adamts4	0.073	85.1%	Nontarget
ADAMTS7	Adamts7	0.105	70.5%	Nontarget
ADAMTS9	Adamts9	0.168	49.7%	Nontarget
ADAMTSL4	Adamtsl4	0.09	76.9%	Nontarget
ADAR	Adar	0.102	71.8%	Nontarget
ADARB1	Adarb1	0.257	34.6%	Nontarget
ADAT1	Adat1	0.108	69.4%	Nontarget
ADAT2	Adat2	0.291	30.3%	Nontarget
ADCK1	Adck1	0.125	62.8%	Nontarget
ADCK5	Adck5	0.142	56.6%	Nontarget
ADCY1	Adcy1	0.267	33.3%	Nontarget
ADCY10	Adcy10	0.198	43.4%	Nontarget
ADCY2	Adcy2	0.392	21.8%	Nontarget
ADCY3	Adcy3	0.338	25.9%	Nontarget
ADCY5	Adcy5	0.353	24.7%	Nontarget
ADCY6	Adcy6	0.569	12.6%	Nontarget
ADCY7	Adcy7	0.387	22.1%	Nontarget
ADCY9	Adcy9	0.132	60.2%	Nontarget
ADCYAP1R1	Adcyap1r1	0.11	68.6%	Nontarget
ADD1	Add1	0.483	16.4%	Nontarget
ADD2	Add2	0.492	16.0%	Nontarget
ADD3	Add3	0.613	11.1%	DAZL.target
ADH5	Adh5	0.237	37.2%	Nontarget
ADI1	Adi1	0.198	43.4%	DAZL.target
ADIPOQ	Adipoq	0.134	59.2%	Nontarget
ADIPOR1	Adipor1	0.266	33.4%	Nontarget
ADIPOR2	Adipor2	0.188	45.4%	DAZL.target
ADK	Adk	0.201	42.9%	DAZL.target
ADM	Adm	0.502	15.5%	Nontarget
ADNP	Adnp	0.878	3.9%	DAZL.target
ADNP2	Adnp2	0.139	57.7%	Nontarget
ADO	Ado	0.2	43.0%	DAZL.target
ADORA2B	Adora2b	0.07	86.2%	Nontarget
ADPGK	Adpgk	0.29	30.4%	Nontarget
ADPRH	Adprh	0.103	71.4%	DAZL.target
ADPRHL2	Adprhl2	0.203	42.6%	Nontarget
ADRB1	Adrb1	0.495	15.8%	Nontarget
ADSL	Adsl	0.75	7.1%	Nontarget
ADSS	Adss	0.671	9.1%	DAZL.target
AEBP1	Aebp1	0.907	3.2%	Nontarget
AEBP2	Aebp2	0.816	5.4%	DAZL.target
AFAP1	Afap1	0.121	64.4%	Nontarget
AFAP1L1	Afap1l1	0.08	81.9%	Nontarget
AFAP1L2	Afap1l2	0.214	40.6%	Nontarget
AFF1	Aff1	0.088	78.0%	Nontarget
AFF3	Aff3	0.779	6.3%	DAZL.target
AFF4	Aff4	0.674	9.1%	Nontarget
AFG3L2	Afg3l2	0.509	15.1%	DAZL.target
AFMID	Afmid	0.057	91.4%	Nontarget
AFP	Afp	0.483	16.4%	Nontarget
AFTPH	Aftph	0.456	17.8%	Nontarget
AGA	Aga	0.034	97.6%	DAZL.target
AGBL2	Agbl2	0.124	63.0%	Nontarget
AGBL3	Agbl3	0.149	54.4%	Nontarget
AGBL4	Agbl4	0.241	36.6%	Nontarget
AGBL5	Agbl5	0.239	37.0%	Nontarget
AGK	Agk	0.146	55.3%	Nontarget
AGL	Agl	0.383	22.4%	Nontarget
AGPAT1	Agpat1	0.309	28.5%	Nontarget
AGPAT2	Agpat2	0.085	79.6%	Nontarget
AGPAT3	Agpat3	0.094	75.2%	Nontarget
AGPAT4	Agpat4	0.249	35.5%	Nontarget
AGPAT5	Agpat5	0.459	17.6%	DAZL.target
AGPS	Agps	0.41	20.5%	DAZL.target
AGRN	Agrn	0.311	28.3%	Nontarget
AGRP	Agrp	0.711	8.1%	Nontarget
AGTPBP1	Agtpbp1	0.61	11.2%	Nontarget
AGTRAP	Agtrap	0.099	73.4%	Nontarget
AHCYL1	Ahcyl1	0.291	30.3%	DAZL.target
AHCYL2	Ahcyl2	0.553	13.1%	Nontarget
AHDC1	Ahdc1	0.078	82.7%	DAZL.target
AHI1	Ahi1	0.145	55.7%	DAZL.target
AHNAK	Ahnak	0.169	49.4%	Nontarget
AHSA1	Ahsa1	0.84	4.8%	Nontarget
AHSG	Ahsg	0.405	20.8%	Nontarget
AIDA	Aida	0.6	11.5%	Nontarget
AIF1	Aif1	0.588	12.0%	Nontarget
AIFM1	Aifm1	0.282	31.3%	Nontarget
AIFM2	Aifm2	0.15	54.1%	Nontarget
AIFM3	Aifm3	0.118	65.4%	Nontarget
AIG1	Aig1	0.118	65.6%	DAZL.target
AIM2	Aim2	0.065	88.3%	Nontarget
AIP	Aip	0.467	17.2%	Nontarget
AIPL1	Aipl1	0.135	59.1%	Nontarget
AJAP1	Ajap1	0.126	62.5%	Nontarget
AK2	Ak2	0.51	15.1%	DAZL.target
AK3	Ak3	0.332	26.4%	Nontarget
AK5	Ak5	0.234	37.6%	Nontarget
AK7	Ak7	0.143	56.5%	Nontarget
AKAP1	Akap1	0.969	1.6%	Nontarget
AKAP10	Akap10	0.46	17.6%	Nontarget
AKAP11	Akap11	0.188	45.3%	DAZL.target
AKAP12	Akap12	0.374	23.2%	Nontarget
AKAP13	Akap13	0.213	40.7%	DAZL.target
AKAP4	Akap4	0.101	72.2%	Nontarget
AKAP5	Akap5	0.078	83.1%	Nontarget
AKAP6	Akap6	0.576	12.4%	Nontarget
AKAP7	Akap7	0.151	54.0%	Nontarget
AKAP8	Akap8	0.095	74.9%	DAZL.target
AKAP8L	Akap8l	0.08	82.1%	Nontarget
AKAP9	Akap9	0.122	63.8%	Nontarget
AKNA	Akna	0.056	91.8%	Nontarget
AKR1A1	Akr1a1	0.275	32.2%	Nontarget
AKR1B1	Akr1b3	0.31	28.4%	Nontarget
AKR1D1	Akr1d1	0.117	65.7%	Nontarget
AKT1	Akt1	0.997	0.4%	Nontarget
AKT1S1	Akt1s1	0.188	45.4%	Nontarget
AKT2	Akt2	0.932	2.6%	Nontarget
AKT3	Akt3	0.543	13.6%	DAZL.target
AKTIP	Aktip	0.495	15.8%	Nontarget
ALAD	Alad	0.1	73.0%	Nontarget
ALAS1	Alas1	0.397	21.4%	Nontarget
ALAS2	Alas2	0.82	5.3%	Nontarget
ALCAM	Alcam	0.625	10.7%	Nontarget
ALDH16A1	Aldh16a1	0.072	85.4%	Nontarget
ALDH18A1	Aldh18a1	0.255	34.8%	Nontarget
ALDH1A2	Aldh1a2	0.368	23.7%	DAZL.target
ALDH1A3	Aldh1a3	0.219	39.8%	Nontarget
ALDH1B1	Aldh1b1	0.677	9.0%	Nontarget
ALDH1L1	Aldh1l1	0.114	66.9%	Nontarget
ALDH1L2	Aldh1l2	0.166	50.2%	Nontarget
ALDH3A2	Aldh3a2	0.061	89.8%	DAZL.target
ALDH4A1	Aldh4a1	0.671	9.2%	Nontarget
ALDH5A1	Aldh5a1	0.773	6.5%	Nontarget
ALDH6A1	Aldh6a1	0.186	45.8%	Nontarget
ALDH7A1	Aldh7a1	0.378	22.9%	DAZL.target
ALDOC	Aldoc	0.304	28.9%	Nontarget
ALG12	Alg12	0.084	80.3%	Nontarget
ALG14	Alg14	0.269	33.1%	Nontarget
ALG2	Alg2	0.061	89.8%	DAZL.target
ALG3	Alg3	0.191	44.7%	Nontarget
ALG5	Alg5	0.28	31.5%	Nontarget
ALG6	Alg6	0.273	32.6%	Nontarget
ALG8	Alg8	0.38	22.7%	Nontarget
ALKBH1	Alkbh1	0.083	80.7%	DAZL.target
ALKBH2	Alkbh2	0.091	76.7%	Nontarget
ALKBH3	Alkbh3	0.132	60.1%	Nontarget
ALKBH4	Alkbh4	0.109	68.9%	Nontarget
ALKBH5	Alkbh5	0.224	39.0%	DAZL.target
ALKBH7	Alkbh7	0.062	89.5%	Nontarget
ALKBH8	Alkbh8	0.318	27.7%	Nontarget
ALMS1	Alms1	0.068	87.2%	Nontarget
ALOX12	Alox12	0.217	40.2%	Nontarget
ALOX12B	Alox12b	0.183	46.4%	Nontarget
ALOX15B	Alox8	0.097	74.2%	Nontarget
ALOXE3	Aloxe3	0.082	80.9%	Nontarget
ALPK1	Alpk1	0.113	67.3%	Nontarget
ALPL	Alpl	0.355	24.6%	Nontarget
ALS2	Als2	0.194	44.2%	DAZL.target
ALS2CL	Als2cl	0.119	65.0%	Nontarget
AMBRA1	Ambra1	0.319	27.6%	Nontarget
AMFR	Amfr	0.256	34.7%	DAZL.target
AMH	Amh	0.348	25.1%	Nontarget
AMHR2	Amhr2	0.27	33.0%	Nontarget
AMIGO1	Amigo1	0.221	39.4%	Nontarget
AMIGO2	Amigo2	0.099	73.4%	Nontarget
AMIGO3	Amigo3	0.076	83.8%	Nontarget
AMMECR1	Ammecr1	0.851	4.6%	Nontarget
AMMECR1L	Ammecr1l	0.384	22.4%	DAZL.target
AMN1	Amn1	0.131	60.7%	Nontarget
AMOT	Amot	0.327	26.9%	DAZL.target
AMOTL1	Amotl1	0.264	33.8%	Nontarget
AMOTL2	Amotl2	0.068	87.0%	DAZL.target
AMPD2	Ampd2	0.204	42.4%	DAZL.target
AMPD3	Ampd3	0.127	61.9%	Nontarget
AMPH	Amph	0.189	45.2%	Nontarget
AMT	Amt	0.368	23.7%	Nontarget
AMZ2	Amz2	0.111	68.0%	Nontarget
ANAPC1	Anapc1	0.493	16.0%	DAZL.target
ANAPC13	Anapc13	0.363	24.1%	Nontarget
ANAPC2	Anapc2	0.14	57.4%	Nontarget
ANAPC4	Anapc4	0.649	9.9%	Nontarget
ANAPC5	Anapc5	0.365	23.8%	Nontarget
ANAPC7	Anapc7	0.602	11.4%	Nontarget
ANGEL1	Angel1	0.18	46.9%	DAZL.target
ANGEL2	Angel2	0.078	83.0%	DAZL.target
ANGPT2	Angpt2	0.372	23.4%	Nontarget
ANGPTL1	Angptl1	0.138	57.9%	Nontarget
ANGPTL2	Angptl2	0.759	6.9%	Nontarget
ANGPTL3	Angptl3	0.501	15.5%	Nontarget
ANGPTL4	Angptl4	0.058	91.0%	Nontarget
ANGPTL6	Angptl6	0.094	75.2%	Nontarget
ANGPTL7	Angptl7	0.715	8.0%	Nontarget
ANK1	Ank1	0.681	8.9%	Nontarget
ANK2	Ank2	0.953	2.0%	Nontarget
ANK3	Ank3	0.794	5.8%	Nontarget
ANKFY1	Ankfy1	0.069	86.7%	DAZL.target
ANKH	Ank	0.099	73.1%	DAZL.target
ANKIB1	Ankib1	0.458	17.7%	Nontarget
ANKLE1	Ankle1	0.056	91.7%	Nontarget
ANKLE2	Ankle2	0.265	33.5%	Nontarget
ANKMY2	Ankmy2	0.333	26.3%	Nontarget
ANKRA2	Ankra2	0.345	25.4%	Nontarget
ANKRD10	Ankrd10	0.448	18.2%	DAZL.target
ANKRD11	Ankrd11	0.207	41.9%	Nontarget
ANKRD12	Ankrd12	0.581	12.2%	DAZL.target
ANKRD13A	Ankrd13a	0.402	21.1%	Nontarget
ANKRD13B	Ankrd13b	0.576	12.4%	Nontarget
ANKRD13C	Ankrd13c	0.456	17.8%	DAZL.target
ANKRD13D	Ankrd13d	0.101	72.4%	Nontarget
ANKRD16	Ankrd16	0.079	82.3%	Nontarget
ANKRD17	Ankrd17	0.267	33.3%	DAZL.target
ANKRD24	Ankrd24	0.078	83.0%	Nontarget
ANKRD27	Ankrd27	0.549	13.3%	Nontarget
ANKRD28	Ankrd28	0.287	30.8%	Nontarget
ANKRD29	Ankrd29	0.077	83.2%	DAZL.target
ANKRD34B	Ankrd34b	0.286	30.8%	Nontarget
ANKRD37	Ankrd37	0.07	86.2%	Nontarget
ANKRD39	Ankrd39	0.241	36.7%	Nontarget
ANKRD40	Ankrd40	0.133	59.6%	Nontarget
ANKRD42	Ankrd42	0.121	64.3%	Nontarget
ANKRD44	Ankrd44	0.291	30.3%	Nontarget
ANKRD46	Ankrd46	0.132	60.2%	DAZL.target
ANKRD49	Ankrd49	0.132	60.3%	Nontarget
ANKRD50	Ankrd50	0.071	86.0%	Nontarget
ANKRD52	Ankrd52	0.74	7.3%	Nontarget
ANKRD54	Ankrd54	0.129	61.1%	Nontarget
ANKRD6	Ankrd6	0.369	23.7%	Nontarget
ANKRD9	Ankrd9	0.145	55.8%	Nontarget
ANKS1A	Anks1	0.376	23.0%	Nontarget
ANKS1B	Anks1b	0.176	47.7%	Nontarget
ANKS3	Anks3	0.055	92.2%	Nontarget
ANKZF1	Ankzf1	0.254	34.9%	Nontarget
ANLN	Anln	0.529	14.2%	DAZL.target
ANP32B	Anp32b	0.762	6.8%	Nontarget
ANP32E	Anp32e	0.708	8.2%	DAZL.target
ANPEP	Anpep	0.181	46.7%	Nontarget
ANTXR1	Antxr1	0.487	16.2%	Nontarget
ANTXR2	Antxr2	0.252	35.2%	Nontarget
ANXA11	Anxa11	0.161	51.3%	Nontarget
ANXA2	Anxa2	0.382	22.5%	Nontarget
ANXA4	Anxa4	0.162	51.2%	Nontarget
ANXA5	Anxa5	0.425	19.5%	Nontarget
ANXA7	Anxa7	0.134	59.3%	DAZL.target
ANXA9	Anxa9	0.116	66.3%	Nontarget
AOC2	Aoc2	0.287	30.7%	Nontarget
AP1B1	Ap1b1	0.508	15.2%	Nontarget
AP1G1	Ap1g1	0.418	20.0%	DAZL.target
AP1G2	Ap1g2	0.085	79.9%	Nontarget
AP1M1	Ap1m1	0.362	24.2%	Nontarget
AP1M2	Ap1m2	0.464	17.4%	Nontarget
AP1S1	Ap1s1	0.228	38.5%	Nontarget
AP1S2	Ap1s2	0.715	7.9%	Nontarget
AP1S3	Ap1s3	0.125	62.5%	Nontarget
AP2A1	Ap2a1	0.094	75.3%	DAZL.target
AP2A2	Ap2a2	0.128	61.4%	Nontarget
AP2B1	Ap2b1	0.699	8.4%	Nontarget
AP2M1	Ap2m1	0.19	44.9%	Nontarget
AP2S1	Ap2s1	0.186	45.7%	Nontarget
AP3B1	Ap3b1	0.335	26.1%	Nontarget
AP3B2	Ap3b2	0.257	34.5%	Nontarget
AP3D1	Ap3d1	0.27	33.0%	Nontarget
AP3M1	Ap3m1	0.198	43.3%	Nontarget
AP3M2	Ap3m2	0.058	91.1%	Nontarget
AP3S1	Ap3s1	0.482	16.5%	Nontarget
AP3S2	Ap3s2	0.073	85.1%	DAZL.target
AP4E1	Ap4e1	0.36	24.3%	Nontarget
AP4S1	Ap4s1	0.134	59.3%	Nontarget
APAF1	Apaf1	0.093	75.8%	Nontarget
APBA1	Apba1	0.128	61.6%	Nontarget
APBA2	Apba2	0.225	39.0%	DAZL.target
APBA3	Apba3	0.111	68.2%	Nontarget
APBB1	Apbb1	0.191	44.8%	Nontarget
APBB1IP	Apbb1ip	0.081	81.3%	DAZL.target
APBB2	Apbb2	0.33	26.6%	Nontarget
APBB3	Apbb3	0.417	20.1%	Nontarget
APC	Apc	0.467	17.2%	DAZL.target
APC2	Apc2	0.448	18.2%	Nontarget
APCDD1	Apcdd1	0.178	47.4%	Nontarget
APEH	Apeh	0.108	69.3%	Nontarget
APEX1	Apex1	0.902	3.3%	DAZL.target
APEX2	Apex2	0.067	87.2%	Nontarget
APH1A	Aph1a	0.081	81.5%	Nontarget
API5	Api5	0.624	10.8%	DAZL.target
APIP	Apip	0.18	47.0%	Nontarget
APLN	Apln	0.014	99.6%	Nontarget
APLP1	Aplp1	0.286	30.9%	Nontarget
APLP2	Aplp2	0.211	41.1%	DAZL.target
APOA2	Apoa2	0.602	11.4%	Nontarget
APOBEC1	Apobec1	0.106	70.4%	Nontarget
APOBEC2	Apobec2	0.596	11.7%	Nontarget
APOBEC3H	Apobec3	0.036	97.3%	Nontarget
APOBEC4	Apobec4	0.085	79.9%	Nontarget
APOC1	Apoc1	0.08	81.7%	Nontarget
APOD	Apod	0.031	98.1%	Nontarget
APOE	Apoe	0.242	36.5%	Nontarget
APOF	Apof	0.189	45.1%	Nontarget
APOLD1	Apold1	0.128	61.7%	Nontarget
APOO	Apoo	0.32	27.6%	Nontarget
APOOL	Apool	0.112	67.7%	Nontarget
APP	App	0.971	1.5%	Nontarget
APPBP2	Appbp2	0.732	7.6%	DAZL.target
APPL1	Appl1	0.297	29.7%	DAZL.target
APPL2	Appl2	0.123	63.4%	Nontarget
APRT	Aprt	0.628	10.6%	Nontarget
APTX	Aptx	0.064	88.9%	Nontarget
AQP11	Aqp11	0.107	70.0%	Nontarget
AQP5	Aqp5	0.292	30.2%	Nontarget
AQP9	Aqp9	0.702	8.3%	Nontarget
AQR	Aqr	0.12	64.6%	DAZL.target
AR	Ar	0.99	0.8%	Nontarget
ARAF	Araf	0.969	1.6%	DAZL.target
ARC	Arc	0.097	74.1%	Nontarget
ARCN1	Arcn1	0.259	34.3%	DAZL.target
ARF1	Arf1	0.347	25.2%	DAZL.target
ARF3	Arf3	0.807	5.6%	DAZL.target
ARF4	Arf4	0.264	33.7%	DAZL.target
ARF5	Arf5	0.151	53.8%	Nontarget
ARF6	Arf6	0.356	24.5%	DAZL.target
ARFGAP1	Arfgap1	0.277	31.9%	Nontarget
ARFGAP2	Arfgap2	0.384	22.4%	Nontarget
ARFGAP3	Arfgap3	0.106	70.4%	DAZL.target
ARFGEF1	Arfgef1	0.848	4.7%	DAZL.target
ARFGEF2	Arfgef2	0.577	12.4%	Nontarget
ARFIP2	Arfip2	0.122	64.0%	Nontarget
ARFRP1	Arfrp1	0.103	71.5%	Nontarget
ARG1	Arg1	0.56	12.9%	Nontarget
ARG2	Arg2	0.101	72.4%	Nontarget
ARGLU1	Arglu1	0.69	8.6%	DAZL.target
ARHGAP1	Arhgap1	0.341	25.6%	DAZL.target
ARHGAP10	Arhgap10	0.126	62.4%	Nontarget
ARHGAP11A	Arhgap11a	0.215	40.5%	Nontarget
ARHGAP12	Arhgap12	0.478	16.7%	Nontarget
ARHGAP17	Arhgap17	0.178	47.4%	DAZL.target
ARHGAP18	Arhgap18	0.083	80.4%	Nontarget
ARHGAP20	Arhgap20	0.216	40.2%	Nontarget
ARHGAP21	Arhgap21	0.292	30.2%	Nontarget
ARHGAP22	Arhgap22	0.1	72.7%	Nontarget
ARHGAP23	Arhgap23	0.274	32.3%	Nontarget
ARHGAP25	Arhgap25	0.735	7.5%	Nontarget
ARHGAP26	Arhgap26	0.299	29.6%	Nontarget
ARHGAP28	Arhgap28	0.098	73.6%	Nontarget
ARHGAP29	Arhgap29	0.075	84.3%	DAZL.target
ARHGAP30	Arhgap30	0.052	93.1%	Nontarget
ARHGAP4	Arhgap4	0.105	70.7%	Nontarget
ARHGAP5	Arhgap5	0.194	44.1%	DAZL.target
ARHGAP9	Arhgap9	0.126	62.4%	Nontarget
ARHGDIA	Arhgdia	0.091	76.5%	Nontarget
ARHGDIG	Arhgdig	0.12	64.6%	Nontarget
ARHGEF1	Arhgef1	0.092	76.2%	DAZL.target
ARHGEF10	Arhgef10	0.192	44.6%	Nontarget
ARHGEF10L	Arhgef10l	0.128	61.5%	Nontarget
ARHGEF11	Arhgef11	0.256	34.7%	DAZL.target
ARHGEF12	Arhgef12	0.389	22.0%	Nontarget
ARHGEF15	Arhgef15	0.206	42.1%	Nontarget
ARHGEF16	Arhgef16	0.132	60.3%	Nontarget
ARHGEF17	Arhgef17	0.266	33.4%	Nontarget
ARHGEF2	Arhgef2	0.199	43.3%	DAZL.target
ARHGEF3	Arhgef3	0.269	33.1%	DAZL.target
ARHGEF4	Arhgef4	0.28	31.6%	Nontarget
ARHGEF5	Arhgef5	0.068	86.8%	Nontarget
ARHGEF7	Arhgef7	0.206	42.0%	DAZL.target
ARHGEF9	Arhgef9	0.209	41.5%	Nontarget
ARID1A	Arid1a	0.531	14.1%	DAZL.target
ARID1B	Arid1b	0.132	60.1%	Nontarget
ARID2	Arid2	0.524	14.4%	Nontarget
ARID3A	Arid3a	0.303	29.1%	Nontarget
ARID3B	Arid3b	0.23	38.2%	Nontarget
ARID3C	Arid3c	0.288	30.6%	Nontarget
ARID4A	Arid4a	0.552	13.2%	Nontarget
ARID4B	Arid4b	0.557	13.0%	DAZL.target
ARID5A	Arid5a	0.083	80.6%	Nontarget
ARID5B	Arid5b	0.709	8.1%	Nontarget
ARIH1	Arih1	0.358	24.4%	DAZL.target
ARIH2	Arih2	0.054	92.5%	DAZL.target
ARL1	Arl1	0.264	33.7%	Nontarget
ARL10	Arl10	0.275	32.3%	Nontarget
ARL13B	Arl13b	0.059	90.9%	Nontarget
ARL15	Arl15	0.547	13.4%	Nontarget
ARL16	Arl16	0.073	84.8%	Nontarget
ARL2	Arl2	0.271	32.8%	Nontarget
ARL2BP	Arl2bp	0.044	95.4%	DAZL.target
ARL3	Arl3	0.478	16.7%	Nontarget
ARL4A	Arl4a	0.423	19.6%	Nontarget
ARL4C	Arl4c	0.569	12.6%	Nontarget
ARL4D	Arl4d	0.05	93.7%	Nontarget
ARL5A	Arl5a	0.115	66.5%	DAZL.target
ARL5B	Arl5b	0.593	11.8%	DAZL.target
ARL6	Arl6	0.07	86.2%	Nontarget
ARL6IP1	Arl6ip1	0.207	41.8%	DAZL.target
ARL6IP4	Arl6ip4	0.099	73.4%	Nontarget
ARL6IP5	Arl6ip5	0.176	47.8%	Nontarget
ARL6IP6	Arl6ip6	0.077	83.3%	DAZL.target
ARL8A	Arl8a	0.073	84.8%	DAZL.target
ARL8B	Arl8b	0.287	30.7%	Nontarget
ARMC1	Armc1	0.182	46.6%	Nontarget
ARMC10	Armc10	0.077	83.2%	Nontarget
ARMC2	Armc2	0.086	79.0%	Nontarget
ARMC5	Armc5	0.174	48.2%	Nontarget
ARMC6	Armc6	0.087	78.7%	Nontarget
ARMC7	Armc7	0.053	92.8%	Nontarget
ARMC8	Armc8	0.256	34.7%	DAZL.target
ARMC9	Armc9	0.342	25.5%	Nontarget
ARMCX1	Armcx1	0.073	84.9%	Nontarget
ARMCX2	Armcx2	0.166	50.1%	DAZL.target
ARMCX3	Armcx3	0.241	36.6%	Nontarget
ARMCX5	Armcx5	0.052	93.3%	Nontarget
ARMCX6	Armcx6	0.133	59.7%	Nontarget
ARNT	Arnt	0.302	29.2%	Nontarget
ARNT2	Arnt2	0.16	51.5%	Nontarget
ARNTL	Arntl	0.704	8.3%	DAZL.target
ARNTL2	Arntl2	0.252	35.2%	Nontarget
ARPC1B	Arpc1b	0.375	23.1%	Nontarget
ARPC2	Arpc2	0.393	21.7%	DAZL.target
ARPC3	Arpc3	0.363	24.1%	DAZL.target
ARPC5	Arpc5	0.077	83.2%	DAZL.target
ARPC5L	Arpc5l	0.066	87.9%	DAZL.target
ARRB1	Arrb1	0.245	36.1%	Nontarget
ARRB2	Arrb2	0.571	12.5%	Nontarget
ARRDC1	Arrdc1	0.079	82.5%	Nontarget
ARRDC2	Arrdc2	0.332	26.4%	Nontarget
ARRDC3	Arrdc3	0.765	6.7%	DAZL.target
ARRDC4	Arrdc4	0.584	12.2%	DAZL.target
ARSA	Arsa	0.134	59.4%	Nontarget
ARSB	Arsb	0.054	92.4%	Nontarget
ARSG	Arsg	0.122	63.9%	Nontarget
ARSK	Arsk	0.04	96.5%	Nontarget
ART1	Art1	0.062	89.7%	Nontarget
ART3	Art3	0.215	40.4%	Nontarget
ART5	Art5	0.166	50.1%	Nontarget
ARV1	Arv1	0.084	79.9%	Nontarget
ARVCF	Arvcf	0.213	40.8%	Nontarget
AS3MT	As3mt	0.077	83.1%	Nontarget
ASAH1	Asah1	0.15	54.0%	DAZL.target
ASB1	Asb1	0.205	42.3%	Nontarget
ASB13	Asb13	0.212	40.9%	Nontarget
ASB16	Asb16	0.184	46.2%	Nontarget
ASB3	Asb3	0.121	64.3%	DAZL.target
ASB5	Asb5	0.314	28.1%	Nontarget
ASB6	Asb6	0.137	58.5%	Nontarget
ASB7	Asb7	0.486	16.3%	Nontarget
ASB8	Asb8	0.222	39.4%	DAZL.target
ASB9	Asb9	0.017	99.5%	Nontarget
ASCC1	Ascc1	0.061	90.0%	Nontarget
ASCC2	Ascc2	0.126	62.2%	Nontarget
ASCC3	Ascc3	0.299	29.5%	DAZL.target
ASCL2	Ascl2	0.367	23.7%	Nontarget
ASCL4	Ascl4	0.069	86.8%	Nontarget
ASF1A	Asf1a	0.994	0.7%	DAZL.target
ASF1B	Asf1b	0.92	2.8%	Nontarget
ASGR2	Asgr2	0.145	55.8%	Nontarget
ASH1L	Ash1l	0.292	30.2%	Nontarget
ASH2L	Ash2l	0.118	65.4%	Nontarget
ASNS	Asns	0.417	20.0%	Nontarget
ASPA	Aspa	0.337	26.0%	Nontarget
ASPH	Asph	0.082	81.0%	Nontarget
ASPHD1	Asphd1	0.108	69.4%	Nontarget
ASPHD2	Asphd2	0.133	60.0%	Nontarget
ASPM	Aspm	0.276	32.1%	Nontarget
ASPN	Aspn	0.718	7.9%	Nontarget
ASRGL1	Asrgl1	0.081	81.5%	Nontarget
ASS1	Ass1	0.409	20.5%	Nontarget
ASTE1	Aste1	0.124	63.0%	Nontarget
ASTN2	Astn2	0.237	37.2%	Nontarget
ASXL1	Asxl1	0.125	62.8%	Nontarget
ASXL2	Asxl2	0.281	31.4%	Nontarget
ASXL3	Asxl3	0.096	74.7%	Nontarget
ASZ1	Asz1	0.102	72.0%	DAZL.target
ATAD1	Atad1	0.315	28.0%	DAZL.target
ATAD2B	Atad2b	0.859	4.4%	DAZL.target
ATAD3A	Atad3a	0.272	32.7%	Nontarget
ATAD5	Atad5	0.332	26.4%	Nontarget
ATCAY	Atcay	0.186	45.8%	Nontarget
ATE1	Ate1	0.285	31.1%	Nontarget
ATF1	Atf1	0.874	4.0%	DAZL.target
ATF2	Atf2	0.87	4.2%	DAZL.target
ATF4	Atf4	0.108	69.5%	Nontarget
ATF6	Atf6	0.219	39.9%	Nontarget
ATF7IP	Atf7ip	0.63	10.5%	Nontarget
ATF7IP2	Atf7ip2	0.057	91.3%	DAZL.target
ATG10	Atg10	0.058	91.2%	Nontarget
ATG12	Atg12	0.088	78.2%	Nontarget
ATG16L1	Atg16l1	0.193	44.3%	Nontarget
ATG16L2	Atg16l2	0.074	84.6%	Nontarget
ATG2A	Atg2a	0.158	52.0%	Nontarget
ATG2B	Atg2b	0.278	31.8%	Nontarget
ATG3	Atg3	0.277	31.9%	Nontarget
ATG4C	Atg4c	0.116	66.1%	Nontarget
ATG4D	Atg4d	0.123	63.5%	Nontarget
ATG5	Atg5	0.295	29.9%	DAZL.target
ATG7	Atg7	0.087	78.5%	Nontarget
ATIC	Atic	0.857	4.4%	DAZL.target
ATM	Atm	0.154	53.0%	DAZL.target
ATMIN	Atmin	0.473	16.9%	Nontarget
ATOH7	Atoh7	0.721	7.8%	Nontarget
ATOH8	Atoh8	0.516	14.8%	Nontarget
ATOX1	Atox1	0.071	85.6%	Nontarget
ATP10A	Atp10a	0.097	74.0%	Nontarget
ATP11A	Atp11a	0.189	45.2%	Nontarget
ATP11B	Atp11b	0.19	44.9%	DAZL.target
ATP11C	Atp11c	0.416	20.2%	DAZL.target
ATP13A1	Atp13a1	0.174	48.3%	Nontarget
ATP13A2	Atp13a2	0.144	56.2%	Nontarget
ATP13A3	Atp13a3	0.728	7.6%	Nontarget
ATP1A1	Atp1a1	0.65	9.9%	Nontarget
ATP1A2	Atp1a2	0.425	19.5%	Nontarget
ATP1B1	Atp1b1	0.331	26.5%	Nontarget
ATP1B2	Atp1b2	0.213	40.8%	Nontarget
ATP1B3	Atp1b3	0.338	25.9%	Nontarget
ATP2A1	Atp2a1	0.698	8.5%	Nontarget
ATP2A2	Atp2a2	0.255	34.7%	DAZL.target
ATP2B1	Atp2b1	0.913	3.0%	DAZL.target
ATP2B4	Atp2b4	0.363	24.1%	DAZL.target
ATP2C1	Atp2c1	0.863	4.3%	Nontarget
ATP4A	Atp4a	0.065	88.1%	Nontarget
ATP6AP1	Atp6ap1	0.065	88.3%	DAZL.target
ATP6AP2	Atp6ap2	0.131	60.7%	DAZL.target
ATP6V0A1	Atp6v0a1	0.418	20.0%	Nontarget
ATP6V0A2	Atp6v0a2	0.226	38.7%	Nontarget
ATP6V0B	Atp6v0b	0.323	27.2%	Nontarget
ATP6V0C	Atp6v0c	0.136	58.8%	Nontarget
ATP6V0D1	Atp6v0d1	0.145	55.8%	Nontarget
ATP6V0E1	Atp6v0e	0.142	56.7%	Nontarget
ATP6V1A	Atp6v1a	0.211	41.2%	DAZL.target
ATP6V1B2	Atp6v1b2	0.835	4.9%	DAZL.target
ATP6V1C1	Atp6v1c1	0.252	35.1%	Nontarget
ATP6V1C2	Atp6v1c2	0.111	68.2%	Nontarget
ATP6V1D	Atp6v1d	0.279	31.6%	Nontarget
ATP6V1E1	Atp6v1e1	0.168	49.6%	Nontarget
ATP6V1F	Atp6v1f	0.09	77.4%	DAZL.target
ATP6V1G1	Atp6v1g1	0.126	62.3%	DAZL.target
ATP6V1G2	Atp6v1g2	0.109	69.0%	Nontarget
ATP6V1H	Atp6v1h	0.112	67.9%	DAZL.target
ATP7A	Atp7a	0.188	45.4%	DAZL.target
ATP7B	Atp7b	0.243	36.4%	Nontarget
ATP8A1	Atp8a1	0.77	6.6%	Nontarget
ATP8A2	Atp8a2	0.309	28.5%	Nontarget
ATP8B2	Atp8b2	0.312	28.3%	Nontarget
ATP8B3	Atp8b3	0.066	87.6%	Nontarget
ATP8B4	Atp8b4	0.088	77.9%	Nontarget
ATP9A	Atp9a	0.113	67.5%	Nontarget
ATP9B	Atp9b	0.196	43.9%	Nontarget
ATPAF1	Atpaf1	0.167	49.8%	Nontarget
ATPAF2	Atpaf2	0.119	64.9%	Nontarget
ATR	Atr	0.761	6.8%	Nontarget
ATRN	Atrn	0.23	38.2%	Nontarget
ATRNL1	Atrnl1	0.507	15.2%	Nontarget
ATXN1	Atxn1	0.965	1.7%	Nontarget
ATXN10	Atxn10	0.141	57.1%	Nontarget
ATXN2	Atxn2	0.893	3.6%	Nontarget
ATXN2L	Atxn2l	0.41	20.5%	DAZL.target
ATXN3L	Atxn3	0.183	46.5%	Nontarget
ATXN7L1	Atxn7l1	0.903	3.3%	Nontarget
ATXN7L2	Atxn7l2	0.217	40.1%	Nontarget
ATXN7L3	Atxn7l3	0.661	9.5%	Nontarget
AUH	Auh	0.108	69.5%	Nontarget
AUP1	Aup1	0.317	27.8%	Nontarget
AURKA	Aurka	0.88	3.9%	Nontarget
AURKAIP1	Aurkaip1	0.053	92.8%	Nontarget
AURKB	Aurkb	0.811	5.5%	Nontarget
AURKC	Aurkc	0.063	89.0%	Nontarget
AUTS2	Auts2	0.741	7.3%	DAZL.target
AVEN	Aven	0.065	88.4%	Nontarget
AVPI1	Avpi1	0.044	95.2%	Nontarget
AXIN1	Axin1	0.253	35.1%	Nontarget
AXIN2	Axin2	0.284	31.2%	DAZL.target
AXL	Axl	0.29	30.4%	Nontarget
AZI2	Azi2	0.4	21.2%	Nontarget
AZIN1	Azin1	0.596	11.7%	DAZL.target
B2M	B2m	0.125	62.8%	DAZL.target
B3GALNT1	B3galnt1	0.707	8.2%	Nontarget
B3GALNT2	B3galnt2	0.082	81.2%	Nontarget
B3GALT1	B3galt1	0.189	45.3%	Nontarget
B3GALT2	B3galt2	0.234	37.7%	Nontarget
B3GALT4	B3galt4	0.122	63.7%	Nontarget
B3GALT6	B3galt6	0.124	63.1%	Nontarget
B3GAT1	B3gat1	0.64	10.2%	Nontarget
B3GAT2	B3gat2	0.212	40.9%	DAZL.target
B3GAT3	B3gat3	0.218	40.0%	Nontarget
B3GNT4	B3gnt4	0.119	64.8%	Nontarget
B3GNT5	B3gnt5	0.089	77.5%	DAZL.target
B3GNT7	B3gnt7	0.343	25.5%	Nontarget
B3GNT8	B3gnt8	0.101	72.3%	Nontarget
B3GNTL1	B3gntl1	0.129	61.3%	Nontarget
B4GALNT1	B4galnt1	0.1	72.6%	Nontarget
B4GALNT2	B4galnt2	0.05	93.7%	Nontarget
B4GALNT3	B4galnt3	0.165	50.4%	Nontarget
B4GALNT4	B4galnt4	0.112	67.7%	Nontarget
B4GALT1	B4galt1	0.497	15.7%	DAZL.target
B4GALT2	B4galt2	0.056	91.9%	Nontarget
B4GALT3	B4galt3	0.247	35.9%	Nontarget
B4GALT4	B4galt4	0.395	21.6%	Nontarget
B4GALT5	B4galt5	0.231	38.0%	DAZL.target
B4GALT6	B4galt6	0.544	13.5%	Nontarget
B4GALT7	B4galt7	0.23	38.3%	Nontarget
B9D1	B9d1	0.084	80.1%	Nontarget
B9D2	B9d2	0.116	66.3%	Nontarget
BACE1	Bace1	0.269	33.0%	Nontarget
BACH1	Bach1	0.803	5.7%	Nontarget
BACH2	Bach2	0.959	1.9%	Nontarget
BAD	Bad	0.175	48.1%	Nontarget
BAG1	Bag1	0.244	36.2%	Nontarget
BAG2	Bag2	0.22	39.7%	Nontarget
BAG3	Bag3	0.578	12.3%	Nontarget
BAG4	Bag4	0.229	38.4%	DAZL.target
BAG5	Bag5	0.318	27.7%	Nontarget
BAHD1	Bahd1	0.15	54.2%	DAZL.target
BAIAP2	Baiap2	0.122	63.7%	Nontarget
BAIAP2L1	Baiap2l1	0.098	73.7%	Nontarget
BAIAP3	Baiap3	0.28	31.5%	Nontarget
BAMBI	Bambi	0.098	73.6%	Nontarget
BANF1	Banf1	0.075	84.2%	DAZL.target
BANK1	Bank1	0.103	71.6%	Nontarget
BANP	Banp	0.589	12.0%	Nontarget
BAP1	Bap1	0.235	37.5%	Nontarget
BARD1	Bard1	0.742	7.3%	Nontarget
BARHL1	Barhl1	0.762	6.8%	Nontarget
BARHL2	Barhl2	0.648	9.9%	Nontarget
BARX1	Barx1	0.161	51.4%	Nontarget
BASP1	Basp1	0.164	50.7%	Nontarget
BATF	Batf	0.862	4.3%	Nontarget
BATF3	Batf3	0.293	30.1%	Nontarget
BAX	Bax	0.796	5.8%	Nontarget
BAZ1A	Baz1a	0.599	11.6%	Nontarget
BAZ1B	Baz1b	0.403	21.0%	DAZL.target
BAZ2A	Baz2a	0.096	74.6%	DAZL.target
BAZ2B	Baz2b	0.259	34.3%	DAZL.target
BBS10	Bbs10	0.09	77.1%	Nontarget
BBS12	Bbs12	0.048	94.2%	Nontarget
BBS2	Bbs2	0.147	54.9%	Nontarget
BBS4	Bbs4	0.107	69.8%	Nontarget
BBS5	Bbs5	0.332	26.5%	Nontarget
BBS7	Bbs7	0.16	51.5%	Nontarget
BBS9	Bbs9	0.319	27.7%	Nontarget
BBX	Bbx	0.408	20.7%	Nontarget
BCAN	Bcan	0.228	38.5%	Nontarget
BCAP29	Bcap29	0.075	84.0%	DAZL.target
BCAP31	Bcap31	0.195	44.0%	DAZL.target
BCAR1	Bcar1	0.457	17.7%	Nontarget
BCAR3	Bcar3	0.236	37.4%	Nontarget
BCAS1	Bcas1	0.135	59.0%	Nontarget
BCAS2	Bcas2	0.137	58.2%	DAZL.target
BCAS3	Bcas3	0.569	12.6%	Nontarget
BCAT2	Bcat2	0.15	54.2%	Nontarget
BCCIP	Bccip	0.272	32.7%	Nontarget
BCDIN3D	Bcdin3d	0.101	72.2%	Nontarget
BCKDHB	Bckdhb	0.21	41.3%	Nontarget
BCKDK	Bckdk	0.168	49.5%	Nontarget
BCL10	Bcl10	0.7	8.4%	DAZL.target
BCL11A	Bcl11a	0.576	12.4%	Nontarget
BCL11B	Bcl11b	0.642	10.1%	Nontarget
BCL2L1	Bcl2l1	0.69	8.6%	Nontarget
BCL2L11	Bcl2l11	0.152	53.6%	Nontarget
BCL2L12	Bcl2l12	0.237	37.2%	Nontarget
BCL2L13	Bcl2l13	0.051	93.5%	Nontarget
BCL2L2	Bcl2l2	0.598	11.6%	Nontarget
BCL6	Bcl6	0.285	30.9%	Nontarget
BCL6B	Bcl6b	0.369	23.6%	DAZL.target
BCL7A	Bcl7a	0.101	72.4%	DAZL.target
BCL7B	Bcl7b	0.303	29.1%	Nontarget
BCL7C	Bcl7c	0.265	33.6%	Nontarget
BCL9	Bcl9	0.75	7.1%	Nontarget
BCL9L	Bcl9l	0.445	18.3%	Nontarget
BCLAF1	Bclaf1	0.807	5.6%	DAZL.target
BCO2	Bco2	0.044	95.3%	Nontarget
BCOR	Bcor	0.299	29.5%	DAZL.target
BCORL1	Bcorl1	0.165	50.3%	DAZL.target
BCR	Bcr	0.26	34.2%	DAZL.target
BCS1L	Bcs1l	0.155	52.8%	Nontarget
BDH1	Bdh1	0.143	56.4%	Nontarget
BDKRB2	Bdkrb2	0.106	70.3%	Nontarget
BDNF	Bdnf	0.828	5.1%	Nontarget
BDP1	Bdp1	0.225	38.9%	DAZL.target
BECN1	Becn1	0.423	19.6%	DAZL.target
BEGAIN	Begain	0.125	62.5%	Nontarget
BEST1	Best1	0.11	68.5%	Nontarget
BEST3	Best3	0.129	61.3%	Nontarget
BFAR	Bfar	0.282	31.3%	Nontarget
BFSP1	Bfsp1	0.132	60.0%	Nontarget
BGN	Bgn	0.973	1.4%	Nontarget
BICC1	Bicc1	0.171	49.0%	DAZL.target
BICD1	Bicd1	0.239	37.0%	Nontarget
BICD2	Bicd2	0.176	47.9%	DAZL.target
BID	Bid	0.053	92.9%	Nontarget
BIK	Bik	0.068	87.1%	Nontarget
BIN1	Bin1	0.189	45.1%	Nontarget
BIN2	Bin2	0.07	86.2%	Nontarget
BIN3	Bin3	0.603	11.4%	Nontarget
BIRC2	Birc2	0.11	68.6%	Nontarget
BIRC3	Birc3	0.285	31.0%	Nontarget
BIRC5	Birc5	0.735	7.5%	Nontarget
BIRC6	Birc6	0.204	42.4%	DAZL.target
BLCAP	Blcap	0.648	9.9%	DAZL.target
BLM	Blm	0.731	7.6%	DAZL.target
BLMH	Blmh	0.515	14.9%	Nontarget
BLOC1S2	Bloc1s2	0.132	60.1%	Nontarget
BLOC1S3	Bloc1s3	0.046	94.8%	Nontarget
BLVRA	Blvra	0.146	55.4%	Nontarget
BLVRB	Blvrb	0.147	55.1%	Nontarget
BLZF1	Blzf1	0.21	41.3%	Nontarget
BMF	Bmf	0.091	76.7%	Nontarget
BMP2K	Bmp2k	0.698	8.5%	Nontarget
BMP3	Bmp3	0.323	27.3%	Nontarget
BMP4	Bmp4	0.993	0.7%	Nontarget
BMP5	Bmp5	0.929	2.6%	Nontarget
BMP6	Bmp6	0.736	7.4%	DAZL.target
BMP7	Bmp7	0.994	0.7%	Nontarget
BMPR1A	Bmpr1a	0.982	1.1%	DAZL.target
BMPR1B	Bmpr1b	0.915	3.0%	Nontarget
BMPR2	Bmpr2	0.853	4.5%	Nontarget
BNC1	Bnc1	0.197	43.5%	DAZL.target
BNC2	Bnc2	0.533	14.0%	DAZL.target
BNIP1	Bnip1	0.215	40.5%	Nontarget
BNIP2	Bnip2	0.518	14.7%	Nontarget
BNIP3	Bnip3	0.141	57.1%	DAZL.target
BNIP3L	Bnip3l	0.623	10.8%	DAZL.target
BOC	Boc	0.102	72.0%	Nontarget
BOK	Bok	0.149	54.4%	Nontarget
BOLA1	Bola1	0.083	80.4%	Nontarget
BOLA3	Bola3	0.212	40.9%	Nontarget
BOLL	Boll	0.173	48.5%	Nontarget
BOP1	Bop1	0.596	11.7%	Nontarget
BPGM	Bpgm	0.643	10.1%	Nontarget
BPHL	Bphl	0.115	66.6%	Nontarget
BPNT1	Bpnt1	0.163	50.7%	Nontarget
BPTF	Bptf	0.37	23.6%	Nontarget
BRAF	Braf	0.952	2.1%	DAZL.target
BRAP	Brap	0.516	14.9%	Nontarget
BRCA1	Brca1	1	0.2%	Nontarget
BRCA2	Brca2	0.976	1.4%	Nontarget
BRD1	Brd1	0.516	14.9%	DAZL.target
BRD2	Brd2	0.374	23.3%	DAZL.target
BRD3	Brd3	0.437	18.8%	DAZL.target
BRD4	Brd4	0.375	23.1%	DAZL.target
BRD8	Brd8	0.155	52.8%	Nontarget
BRD9	Brd9	0.101	72.3%	Nontarget
BRDT	Brdt	0.127	61.8%	DAZL.target
BRF1	Brf1	0.278	31.8%	Nontarget
BRF2	Brf2	0.712	8.1%	Nontarget
BRI3BP	Bri3bp	0.127	62.0%	Nontarget
BRIP1	Brip1	0.195	44.0%	Nontarget
BRMS1	Brms1	0.118	65.4%	Nontarget
BRMS1L	Brms1l	0.225	38.8%	Nontarget
BRPF1	Brpf1	0.57	12.6%	Nontarget
BRPF3	Brpf3	0.207	41.8%	Nontarget
BRSK1	Brsk1	0.332	26.4%	Nontarget
BRSK2	Brsk2	0.14	57.3%	DAZL.target
BRWD1	Brwd1	0.532	14.0%	DAZL.target
BRWD3	Brwd3	0.66	9.5%	Nontarget
BSCL2	Bscl2	0.066	87.8%	Nontarget
BSDC1	Bsdc1	0.544	13.5%	Nontarget
BSG	Bsg	0.135	59.0%	Nontarget
BSPRY	Bspry	0.46	17.6%	Nontarget
BST2	Bst2	0.303	29.1%	Nontarget
BTAF1	Btaf1	0.958	1.9%	DAZL.target
BTBD1	Btbd1	0.178	47.4%	Nontarget
BTBD10	Btbd10	0.347	25.2%	DAZL.target
BTBD11	Btbd11	0.355	24.6%	Nontarget
BTBD16	Btbd16	0.06	90.2%	Nontarget
BTBD2	Btbd2	0.13	60.8%	Nontarget
BTBD3	Btbd3	0.198	43.3%	DAZL.target
BTBD6	Btbd6	0.129	61.3%	Nontarget
BTBD7	Btbd7	0.34	25.7%	DAZL.target
BTBD9	Btbd9	0.267	33.3%	Nontarget
BTC	Btc	0.31	28.4%	Nontarget
BTD	Btd	0.054	92.4%	Nontarget
BTF3	Btf3	0.352	24.8%	Nontarget
BTG2	Btg2	0.506	15.2%	Nontarget
BTG3	Btg3	0.373	23.3%	Nontarget
BTN2A2	Btn2a2	0.081	81.3%	Nontarget
BTRC	Btrc	0.264	33.7%	Nontarget
BUB1	Bub1	0.997	0.5%	Nontarget
BUB3	Bub3	0.947	2.2%	DAZL.target
BUD13	Bud13	0.194	44.2%	Nontarget
BUD31	Bud31	0.199	43.2%	Nontarget
BVES	Bves	0.273	32.5%	Nontarget
BYSL	Bysl	0.631	10.5%	Nontarget
BZW1	Bzw1	0.756	7.0%	DAZL.target
BZW2	Bzw2	0.176	47.8%	Nontarget
C10orf53	1700024G13Rik	0.055	92.1%	Nontarget
C10orf88	2310057M21Rik	0.376	23.0%	DAZL.target
C11orf1	1110032A03Rik	0.101	72.6%	Nontarget
C11orf24	1810055G02Rik	0.039	96.7%	Nontarget
C11orf49	1110051M20Rik	0.203	42.6%	Nontarget
C11orf52	2310030G06Rik	0.072	85.5%	Nontarget
C11orf54	4931406C07Rik	0.086	79.2%	Nontarget
C11orf58	1110004F10Rik	0.407	20.8%	DAZL.target
C11orf65	4930550C14Rik	0.093	75.8%	Nontarget
C11orf68	AI837181	0.317	27.8%	Nontarget
C11orf71	Gm5617	0.075	84.2%	Nontarget
C11orf74	B230118H07Rik	0.055	92.1%	Nontarget
C11orf80	Gm960	0.035	97.4%	Nontarget
C12orf10	Myg1	0.241	36.7%	Nontarget
C12orf29	4930430F08Rik	0.225	38.9%	Nontarget
C12orf43	2210016L21Rik	0.113	67.3%	Nontarget
C12orf45	D10Wsu102e	0.154	53.1%	DAZL.target
C12orf49	2410131K14Rik	0.11	68.5%	Nontarget
C12orf56	D930020B18Rik	0.104	70.9%	Nontarget
C12orf57	Grcc10	0.045	95.1%	Nontarget
C12orf60	BC049715	0.05	93.8%	Nontarget
C12orf65	2810006K23Rik	0.05	93.7%	Nontarget
C14orf119	1700123O20Rik	0.279	31.7%	Nontarget
C14orf28	Gm527	0.486	16.3%	DAZL.target
C14orf39	4930447C04Rik	0.101	72.4%	Nontarget
C14orf93	4931414P19Rik	0.307	28.7%	Nontarget
C15orf39	1700017B05Rik	0.118	65.5%	Nontarget
C15orf40	3110040N11Rik	0.061	90.0%	Nontarget
C15orf41	BC052040	0.175	48.0%	Nontarget
C15orf48	AA467197	0.06	90.4%	Nontarget
C16orf46	1700030J22Rik	0.046	94.9%	Nontarget
C16orf58	BC017158	0.085	79.3%	Nontarget
C16orf70	D230025D16Rik	0.146	55.5%	Nontarget
C16orf72	1810013L24Rik	0.133	59.8%	DAZL.target
C16orf78	4933402J07Rik	0.034	97.6%	Nontarget
C17orf49	0610010K14Rik	0.34	25.7%	Nontarget
C17orf53	BC030867	0.038	96.8%	Nontarget
C17orf64	1700125H20Rik	0.121	64.3%	Nontarget
C17orf75	5730455P16Rik	0.37	23.6%	Nontarget
C18orf21	2700062C07Rik	0.05	93.8%	Nontarget
C18orf25	8030462N17Rik	0.367	23.7%	Nontarget
C18orf32	BC031181	0.148	54.7%	Nontarget
C18orf54	4930503L19Rik	0.053	92.6%	Nontarget
C19orf12	1600014C10Rik	0.107	70.0%	Nontarget
C19orf44	1700030K09Rik	0.048	94.2%	DAZL.target
C19orf47	2310022A10Rik	0.13	60.8%	Nontarget
C19orf53	D8Ertd738e	0.098	73.7%	Nontarget
C19orf54	BC024978	0.07	86.3%	Nontarget
C19orf57	4930432K21Rik	0.061	89.8%	Nontarget
C1GALT1	C1galt1	0.144	56.0%	Nontarget
C1GALT1C1	C1galt1c1	0.208	41.6%	Nontarget
C1orf105	4930558K02Rik	0.051	93.6%	Nontarget
C1orf109	9930104L06Rik	0.071	86.0%	Nontarget
C1orf112	BC055324	0.399	21.3%	Nontarget
C1orf115	C130074G19Rik	0.103	71.4%	Nontarget
C1orf122	1110065P20Rik	0.084	79.9%	DAZL.target
C1orf131	2810004N23Rik	0.066	87.9%	Nontarget
C1orf146	1700028K03Rik	0.055	92.1%	Nontarget
C1orf159	9430015G10Rik	0.083	80.7%	Nontarget
C1orf174	A430005L14Rik	0.143	56.5%	Nontarget
C1orf189	1700094D03Rik	0.008	99.8%	Nontarget
C1orf198	2310022B05Rik	0.199	43.2%	Nontarget
C1orf21	1700025G04Rik	0.207	41.8%	Nontarget
C1orf216	5730409E04Rik	0.121	64.1%	Nontarget
C1orf35	2310033P09Rik	0.104	71.1%	Nontarget
C1orf50	AU022252	0.037	97.0%	Nontarget
C1orf52	2410004B18Rik	0.119	65.0%	Nontarget
C1orf53	2310009B15Rik	0.061	89.8%	Nontarget
C1orf54	BC028528	0.053	92.6%	Nontarget
C1orf56	Gm128	0.066	87.7%	Nontarget
C1orf74	A130010J15Rik	0.11	68.4%	Nontarget
C1orf94	CK137956	0.127	62.1%	Nontarget
C1QBP	C1qbp	0.717	7.9%	Nontarget
C1QL1	C1ql1	0.172	48.7%	Nontarget
C1QTNF4	C1qtnf4	0.08	82.2%	Nontarget
C1QTNF5	C1qtnf5	0.09	77.3%	Nontarget
C1QTNF6	C1qtnf6	0.131	60.5%	Nontarget
C1RL	C1rl	0.072	85.2%	Nontarget
C20orf173	6430550D23Rik	0.054	92.5%	Nontarget
C20orf194	4930402H24Rik	0.384	22.4%	Nontarget
C20orf27	1700037H04Rik	0.132	60.3%	Nontarget
C20orf85	1700021F07Rik	0.163	50.8%	Nontarget
C21orf91	D16Ertd472e	0.281	31.5%	Nontarget
C2CD2	C2cd2	0.071	85.6%	Nontarget
C2CD2L	C2cd2l	0.408	20.6%	Nontarget
C2CD3	C2cd3	0.306	28.9%	Nontarget
C2orf42	C87436	0.186	45.8%	Nontarget
C2orf49	AI597479	0.264	33.7%	DAZL.target
C3orf18	6430571L13Rik	0.276	32.1%	Nontarget
C3orf33	E130311K13Rik	0.097	74.2%	Nontarget
C3orf38	4930453N24Rik	0.047	94.6%	Nontarget
C3orf62	1700102P08Rik	0.071	86.0%	Nontarget
C3orf67	4930452B06Rik	0.336	26.1%	DAZL.target
C4orf33	D3Ertd751e	0.114	67.0%	Nontarget
C5	Hc	0.225	38.9%	Nontarget
C5orf15	9530068E07Rik	0.223	39.2%	DAZL.target
C5orf22	6030458C11Rik	0.118	65.4%	Nontarget
C5orf24	B230219D22Rik	0.297	29.8%	Nontarget
C5orf30	D1Ertd622e	0.265	33.5%	Nontarget
C5orf34	4833420G17Rik	0.185	45.9%	DAZL.target
C6orf118	1700010I14Rik	0.053	92.7%	Nontarget
C6orf120	1600012H06Rik	0.233	37.8%	Nontarget
C6orf132	AI661453	0.171	49.0%	Nontarget
C6orf136	2310061I04Rik	0.25	35.5%	Nontarget
C6orf141	9130008F23Rik	0.729	7.6%	Nontarget
C6orf47	D17H6S53E	0.34	25.7%	Nontarget
C6orf62	BC005537	0.59	11.9%	DAZL.target
C6orf89	BC004004	0.294	30.0%	Nontarget
C7orf25	AW209491	0.112	67.7%	Nontarget
C7orf26	E130309D02Rik	0.125	62.5%	Nontarget
C7orf31	4921507P07Rik	0.088	77.9%	Nontarget
C7orf50	3110082I17Rik	0.075	84.0%	Nontarget
C7orf57	Gm11992	0.073	84.9%	Nontarget
C8B	C8b	0.047	94.6%	Nontarget
C8G	C8g	0.042	96.0%	Nontarget
C8orf33	1110038F14Rik	0.102	71.8%	DAZL.target
C8orf34	A830018L16Rik	0.222	39.3%	Nontarget
C8orf37	2610301B20Rik	0.119	65.0%	DAZL.target
C9orf116	1700007K13Rik	0.106	70.2%	Nontarget
C9orf40	D030056L22Rik	0.22	39.6%	DAZL.target
C9orf43	4933430I17Rik	0.025	98.8%	Nontarget
C9orf64	2210016F16Rik	0.106	70.4%	Nontarget
C9orf72	C9orf72	0.219	39.9%	Nontarget
C9orf78	BC005624	0.133	60.0%	Nontarget
C9orf85	1110059E24Rik	0.165	50.2%	Nontarget
CA10	Car10	0.346	25.2%	Nontarget
CA11	Car11	0.594	11.8%	Nontarget
CA12	Car12	0.181	46.7%	Nontarget
CA5A	Car5a	0.097	73.9%	Nontarget
CA5B	Car5b	0.077	83.4%	Nontarget
CA6	Car6	0.115	66.7%	Nontarget
CA7	Car7	0.284	31.2%	Nontarget
CA8	Car8	0.393	21.7%	Nontarget
CAB39	Cab39	0.65	9.8%	DAZL.target
CAB39L	Cab39l	0.372	23.3%	DAZL.target
CABLES1	Cables1	0.247	35.9%	Nontarget
CABLES2	Cables2	0.173	48.6%	DAZL.target
CABYR	Cabyr	0.034	97.5%	Nontarget
CACHD1	Cachd1	0.547	13.4%	Nontarget
CACNA1A	Cacna1a	0.611	11.2%	Nontarget
CACNA1B	Cacna1b	0.352	24.8%	Nontarget
CACNA1C	Cacna1c	0.588	12.0%	Nontarget
CACNA1D	Cacna1d	0.482	16.5%	Nontarget
CACNA1H	Cacna1h	0.104	71.1%	Nontarget
CACNA2D1	Cacna2d1	0.307	28.7%	Nontarget
CACNA2D2	Cacna2d2	0.415	20.2%	Nontarget
CACNA2D3	Cacna2d3	0.562	12.8%	Nontarget
CACNB1	Cacnb1	0.085	79.6%	Nontarget
CACNB3	Cacnb3	0.287	30.8%	Nontarget
CACNG4	Cacng4	0.576	12.4%	Nontarget
CACNG6	Cacng6	0.033	97.7%	Nontarget
CACNG7	Cacng7	0.232	37.9%	Nontarget
CACNG8	Cacng8	0.109	68.9%	Nontarget
CACYBP	Cacybp	0.434	19.0%	DAZL.target
CAD	Cad	0.688	8.7%	DAZL.target
CADM1	Cadm1	0.683	8.8%	DAZL.target
CADM4	Cadm4	0.25	35.4%	Nontarget
CADPS2	Cadps2	0.365	23.9%	Nontarget
CAGE1	Cage1	0.029	98.3%	Nontarget
CALB2	Calb2	0.27	33.0%	Nontarget
CALCOCO1	Calcoco1	0.115	66.6%	Nontarget
CALCRL	Calcrl	0.286	30.8%	Nontarget
CALD1	Cald1	0.813	5.4%	Nontarget
CALM2	Calm2	0.64	10.2%	DAZL.target
CALML4	Calml4	0.116	65.9%	Nontarget
CALR	Calr	0.871	4.1%	DAZL.target
CALR3	Calr3	0.09	77.1%	Nontarget
CALU	Calu	0.586	12.1%	DAZL.target
CALY	Caly	0.125	62.7%	Nontarget
CAMK1D	Camk1d	0.155	52.9%	Nontarget
CAMK1G	Camk1g	0.354	24.7%	Nontarget
CAMK2A	Camk2a	0.609	11.3%	Nontarget
CAMK2B	Camk2b	0.247	36.0%	Nontarget
CAMK2G	Camk2g	0.481	16.5%	DAZL.target
CAMK2N1	Camk2n1	0.264	33.7%	Nontarget
CAMK2N2	Camk2n2	0.281	31.5%	Nontarget
CAMK4	Camk4	0.153	53.2%	Nontarget
CAMKK1	Camkk1	0.546	13.4%	Nontarget
CAMKK2	Camkk2	0.469	17.1%	DAZL.target
CAMKV	Camkv	0.864	4.3%	Nontarget
CAMLG	Caml	0.071	85.8%	Nontarget
CAMSAP1	Camsap1	0.176	47.9%	DAZL.target
CAMTA1	Camta1	0.196	43.9%	Nontarget
CAMTA2	Camta2	0.286	30.8%	Nontarget
CAND1	Cand1	0.277	31.9%	DAZL.target
CAND2	Cand2	0.205	42.2%	DAZL.target
CANT1	Cant1	0.124	63.2%	Nontarget
CANX	Canx	0.786	6.1%	DAZL.target
CAP1	Cap1	0.202	42.7%	Nontarget
CAP2	Cap2	0.285	31.0%	Nontarget
CAPG	Capg	0.121	64.3%	Nontarget
CAPN1	Capn1	0.538	13.8%	Nontarget
CAPN10	Capn10	0.059	90.8%	Nontarget
CAPN2	Capn2	0.184	46.1%	Nontarget
CAPN5	Capn5	0.208	41.6%	Nontarget
CAPN6	Capn6	0.537	13.9%	Nontarget
CAPN7	Capn7	0.083	80.5%	DAZL.target
CAPNS1	Capns1	0.07	86.1%	Nontarget
CAPRIN1	Caprin1	0.376	23.0%	DAZL.target
CAPRIN2	Caprin2	0.639	10.2%	Nontarget
CAPSL	Capsl	0.084	79.9%	Nontarget
CAPZA2	Capza2	0.489	16.1%	DAZL.target
CAPZB	Capzb	0.2	43.0%	Nontarget
CARD10	Card10	0.107	70.1%	Nontarget
CARD6	Card6	0.033	97.7%	Nontarget
CARHSP1	Carhsp1	0.317	27.8%	Nontarget
CARM1	Carm1	0.164	50.5%	Nontarget
CARS	Cars	0.156	52.6%	Nontarget
CARS2	Cars2	0.078	83.1%	Nontarget
CARTPT	Cartpt	0.295	29.9%	Nontarget
CASC1	Casc1	0.133	59.6%	Nontarget
CASC3	Casc3	0.081	81.5%	DAZL.target
CASC4	Casc4	0.08	82.1%	DAZL.target
CASD1	Casd1	0.274	32.3%	Nontarget
CASK	Cask	0.996	0.6%	Nontarget
CASKIN1	Caskin1	0.195	44.1%	Nontarget
CASKIN2	Caskin2	0.194	44.3%	Nontarget
CASP2	Casp2	0.268	33.2%	DAZL.target
CASP3	Casp3	0.933	2.6%	Nontarget
CASP6	Casp6	0.276	32.2%	Nontarget
CASP7	Casp7	0.425	19.5%	DAZL.target
CASP8AP2	Casp8ap2	0.101	72.5%	Nontarget
CASP9	Casp9	0.175	48.1%	DAZL.target
CASQ1	Casq1	0.445	18.4%	Nontarget
CASQ2	Casq2	0.109	68.9%	Nontarget
CASS4	Cass4	0.107	69.7%	Nontarget
CAST	Cast	0.215	40.4%	Nontarget
CAT	Cat	0.424	19.6%	Nontarget
CATSPER2	Catsper2	0.035	97.4%	Nontarget
CBFA2T2	Cbfa2t2	0.334	26.2%	Nontarget
CBFB	Cbfb	0.818	5.3%	DAZL.target
CBL	Cbl	0.998	0.4%	DAZL.target
CBLB	Cblb	0.462	17.5%	DAZL.target
CBLL1	Cbll1	0.235	37.4%	DAZL.target
CBLN1	Cbln1	0.762	6.8%	Nontarget
CBLN2	Cbln2	0.416	20.1%	Nontarget
CBLN3	Cbln3	0.094	75.1%	Nontarget
CBR3	Cbr3	0.143	56.4%	Nontarget
CBR4	Cbr4	0.206	42.1%	Nontarget
CBX1	Cbx1	0.156	52.5%	Nontarget
CBX2	Cbx2	0.113	67.3%	DAZL.target
CBX3	Cbx3	0.599	11.6%	DAZL.target
CBX4	Cbx4	0.879	3.9%	Nontarget
CBX5	Cbx5	0.732	7.5%	Nontarget
CBX7	Cbx7	0.684	8.8%	Nontarget
CBX8	Cbx8	0.926	2.7%	DAZL.target
CBY1	Cby1	0.075	84.1%	Nontarget
CC2D1A	Cc2d1a	0.083	80.5%	Nontarget
CC2D1B	Cc2d1b	0.09	77.4%	Nontarget
CC2D2A	Cc2d2a	0.083	80.4%	Nontarget
CCAR1	Ccar1	0.577	12.4%	DAZL.target
CCBE1	Ccbe1	0.139	57.6%	Nontarget
CCDC102A	Ccdc102a	0.129	61.1%	Nontarget
CCDC106	Ccdc106	0.095	75.0%	Nontarget
CCDC107	Ccdc107	0.008	99.9%	Nontarget
CCDC112	Ccdc112	0.227	38.6%	DAZL.target
CCDC113	Ccdc113	0.046	94.8%	Nontarget
CCDC114	Ccdc114	0.089	77.5%	Nontarget
CCDC115	Ccdc115	0.092	76.4%	Nontarget
CCDC116	Ccdc116	0.073	84.8%	Nontarget
CCDC117	Ccdc117	0.149	54.4%	DAZL.target
CCDC12	Ccdc12	0.072	85.4%	DAZL.target
CCDC120	Ccdc120	0.168	49.6%	Nontarget
CCDC122	Ccdc122	0.212	40.9%	Nontarget
CCDC124	Ccdc124	0.189	45.0%	Nontarget
CCDC125	Ccdc125	0.115	66.5%	Nontarget
CCDC126	Ccdc126	0.2	43.0%	Nontarget
CCDC127	Ccdc127	0.108	69.6%	DAZL.target
CCDC130	Ccdc130	0.076	83.9%	Nontarget
CCDC134	Ccdc134	0.068	87.0%	Nontarget
CCDC136	Ccdc136	0.093	75.7%	Nontarget
CCDC137	Ccdc137	0.037	97.0%	Nontarget
CCDC138	Ccdc138	0.134	59.2%	DAZL.target
CCDC14	Ccdc14	0.064	88.8%	Nontarget
CCDC141	Ccdc141	0.186	45.8%	Nontarget
CCDC148	Ccdc148	0.084	80.3%	Nontarget
CCDC15	Ccdc15	0.038	96.9%	Nontarget
CCDC150	Ccdc150	0.155	52.7%	Nontarget
CCDC151	Ccdc151	0.083	80.6%	Nontarget
CCDC17	Ccdc17	0.043	95.7%	Nontarget
CCDC18	Ccdc18	0.087	78.3%	Nontarget
CCDC22	Ccdc22	0.076	83.7%	Nontarget
CCDC24	Ccdc24	0.054	92.4%	Nontarget
CCDC25	Ccdc25	0.079	82.4%	DAZL.target
CCDC28A	Ccdc28a	0.043	95.7%	Nontarget
CCDC28B	Ccdc28b	0.149	54.5%	Nontarget
CCDC3	Ccdc3	0.13	61.1%	Nontarget
CCDC34	Ccdc34	0.086	79.3%	Nontarget
CCDC36	Ccdc36	0.081	81.4%	Nontarget
CCDC38	Ccdc38	0.082	81.2%	Nontarget
CCDC39	Ccdc39	0.176	47.7%	Nontarget
CCDC43	Ccdc43	0.179	47.3%	DAZL.target
CCDC47	Ccdc47	0.381	22.6%	Nontarget
CCDC50	Ccdc50	0.042	95.9%	Nontarget
CCDC51	Ccdc51	0.082	81.0%	Nontarget
CCDC57	Ccdc57	0.103	71.5%	Nontarget
CCDC58	Ccdc58	0.531	14.1%	Nontarget
CCDC59	Ccdc59	0.308	28.7%	Nontarget
CCDC6	Ccdc6	0.363	24.0%	DAZL.target
CCDC60	Ccdc60	0.07	86.4%	Nontarget
CCDC61	Ccdc61	0.075	84.2%	Nontarget
CCDC62	Ccdc62	0.094	75.3%	Nontarget
CCDC65	Ccdc65	0.138	58.1%	Nontarget
CCDC66	Ccdc66	0.061	89.8%	Nontarget
CCDC69	Ccdc69	0.067	87.6%	Nontarget
CCDC71	Ccdc71	0.285	31.0%	Nontarget
CCDC73	Ccdc73	0.214	40.7%	DAZL.target
CCDC77	Ccdc77	0.049	94.0%	Nontarget
CCDC78	Ccdc78	0.074	84.4%	Nontarget
CCDC8	Ccdc8	0.096	74.6%	Nontarget
CCDC82	Ccdc82	0.091	76.6%	Nontarget
CCDC84	Ccdc84	0.082	81.0%	Nontarget
CCDC85B	Ccdc85b	0.177	47.6%	Nontarget
CCDC86	Ccdc86	0.141	57.2%	Nontarget
CCDC88A	Ccdc88a	0.185	45.9%	Nontarget
CCDC88C	Ccdc88c	0.113	67.2%	Nontarget
CCDC9	Ccdc9	0.194	44.3%	Nontarget
CCDC90B	Ccdc90b	0.12	64.6%	Nontarget
CCDC91	Ccdc91	0.122	64.0%	Nontarget
CCDC92	Ccdc92	0.284	31.1%	Nontarget
CCDC93	Ccdc93	0.072	85.2%	Nontarget
CCDC97	Ccdc97	0.082	80.9%	Nontarget
CCHCR1	Cchcr1	0.073	84.8%	Nontarget
CCL28	Ccl28	0.122	63.8%	Nontarget
CCM2	Ccm2	0.145	55.7%	Nontarget
CCNA1	Ccna1	0.772	6.5%	Nontarget
CCNA2	Ccna2	0.999	0.3%	Nontarget
CCNB1	Ccnb1	0.999	0.3%	Nontarget
CCNB1IP1	Ccnb1ip1	0.108	69.2%	Nontarget
CCNB2	Ccnb2	0.9	3.4%	Nontarget
CCNB3	Ccnb3	0.139	57.7%	Nontarget
CCNC	Ccnc	0.939	2.5%	DAZL.target
CCND1	Ccnd1	0.999	0.2%	DAZL.target
CCND3	Ccnd3	0.887	3.7%	Nontarget
CCNDBP1	Ccndbp1	0.041	96.3%	Nontarget
CCNE1	Ccne1	1	0.1%	Nontarget
CCNE2	Ccne2	0.997	0.4%	Nontarget
CCNF	Ccnf	0.481	16.6%	Nontarget
CCNG1	Ccng1	0.642	10.2%	DAZL.target
CCNG2	Ccng2	0.302	29.2%	Nontarget
CCNH	Ccnh	0.702	8.4%	Nontarget
CCNI	Ccni	0.234	37.6%	DAZL.target
CCNJ	Ccnj	0.423	19.7%	Nontarget
CCNJL	Ccnjl	0.148	54.8%	DAZL.target
CCNK	Ccnk	0.893	3.5%	DAZL.target
CCNL1	Ccnl1	0.391	21.8%	DAZL.target
CCNO	Ccno	0.068	87.0%	Nontarget
CCNT1	Ccnt1	0.544	13.5%	Nontarget
CCNT2	Ccnt2	0.898	3.4%	Nontarget
CCNY	Ccny	0.176	47.7%	DAZL.target
CCPG1	Ccpg1	0.121	64.2%	DAZL.target
CCR4	Ccr4	0.133	59.7%	Nontarget
CCR9	Ccr9	0.188	45.4%	Nontarget
CCRL2	Ccrl2	0.072	85.3%	Nontarget
CCS	Ccs	0.058	91.1%	Nontarget
CCT2	Cct2	0.262	33.9%	DAZL.target
CCT3	Cct3	0.917	2.9%	DAZL.target
CCT4	Cct4	0.71	8.1%	DAZL.target
CCT5	Cct5	0.777	6.3%	Nontarget
CCT6A	Cct6a	0.225	38.9%	DAZL.target
CCT6B	Cct6b	0.101	72.4%	Nontarget
CCT7	Cct7	0.456	17.8%	DAZL.target
CCT8	Cct8	0.868	4.2%	DAZL.target
CD109	Cd109	0.236	37.3%	Nontarget
CD151	Cd151	0.132	60.3%	Nontarget
CD160	Cd160	0.076	83.7%	Nontarget
CD164	Cd164	0.236	37.3%	DAZL.target
CD164L2	Cd164l2	0.161	51.2%	Nontarget
CD2	Cd2	0.288	30.6%	Nontarget
CD200	Cd200	0.242	36.6%	Nontarget
CD22	Cd22	0.31	28.4%	Nontarget
CD27	Cd27	0.13	61.1%	Nontarget
CD274	Cd274	0.03	98.1%	Nontarget
CD276	Cd276	0.081	81.5%	Nontarget
CD2AP	Cd2ap	0.64	10.2%	Nontarget
CD2BP2	Cd2bp2	0.288	30.6%	Nontarget
CD300LG	Cd300lg	0.053	92.7%	Nontarget
CD302	Cd302	0.25	35.4%	Nontarget
CD320	Cd320	0.049	93.9%	Nontarget
CD34	Cd34	0.04	96.4%	Nontarget
CD38	Cd38	0.051	93.4%	Nontarget
CD3D	Cd3d	0.052	93.0%	Nontarget
CD3EAP	Cd3eap	0.178	47.3%	Nontarget
CD46	Cd46	0.086	78.8%	Nontarget
CD47	Cd47	0.071	85.8%	Nontarget
CD5L	Cd5l	0.047	94.4%	Nontarget
CD63	Cd63	0.422	19.7%	Nontarget
CD7	Cd7	0.108	69.5%	Nontarget
CD70	Cd70	0.088	77.8%	Nontarget
CD79A	Cd79a	0.105	70.6%	Nontarget
CD80	Cd80	0.076	83.6%	Nontarget
CD81	Cd81	0.125	62.6%	Nontarget
CD82	Cd82	0.248	35.8%	Nontarget
CD84	Cd84	0.059	90.8%	Nontarget
CD8A	Cd8a	0.071	85.8%	Nontarget
CD9	Cd9	0.381	22.6%	DAZL.target
CD93	Cd93	0.142	56.7%	Nontarget
CD99L2	Cd99l2	0.065	88.1%	Nontarget
CDA	Cda	0.148	54.8%	Nontarget
CDADC1	Cdadc1	0.147	55.2%	Nontarget
CDAN1	Cdan1	0.096	74.5%	Nontarget
CDC123	Cdc123	0.15	54.2%	Nontarget
CDC14A	Cdc14a	0.84	4.8%	Nontarget
CDC16	Cdc16	0.765	6.7%	Nontarget
CDC20	Cdc20	0.997	0.4%	DAZL.target
CDC20B	Cdc20b	0.128	61.5%	Nontarget
CDC23	Cdc23	0.811	5.5%	DAZL.target
CDC25A	Cdc25a	0.999	0.2%	DAZL.target
CDC25B	Cdc25b	0.668	9.3%	Nontarget
CDC25C	Cdc25c	0.993	0.7%	Nontarget
CDC26	Cdc26	0.398	21.3%	Nontarget
CDC27	Cdc27	0.919	2.9%	DAZL.target
CDC37	Cdc37	0.255	34.7%	Nontarget
CDC37L1	Cdc37l1	0.102	72.2%	DAZL.target
CDC40	Cdc40	0.233	37.8%	DAZL.target
CDC42BPA	Cdc42bpa	0.295	29.9%	DAZL.target
CDC42BPB	Cdc42bpb	0.201	42.8%	DAZL.target
CDC42BPG	Cdc42bpg	0.099	73.3%	Nontarget
CDC42EP1	Cdc42ep1	0.076	83.9%	Nontarget
CDC42EP2	Cdc42ep2	0.104	71.0%	Nontarget
CDC42EP3	Cdc42ep3	0.098	73.7%	Nontarget
CDC42EP4	Cdc42ep4	0.133	59.8%	DAZL.target
CDC42EP5	Cdc42ep5	0.121	64.4%	Nontarget
CDC42SE1	Cdc42se1	0.175	47.9%	Nontarget
CDC42SE2	Cdc42se2	0.221	39.5%	DAZL.target
CDC6	Cdc6	0.998	0.4%	Nontarget
CDC7	Cdc7	0.882	3.8%	DAZL.target
CDC73	Cdc73	0.22	39.7%	DAZL.target
CDCA2	Cdca2	0.041	96.1%	Nontarget
CDCA3	Cdca3	0.578	12.3%	Nontarget
CDCA4	Cdca4	0.24	36.8%	DAZL.target
CDCA5	Cdca5	0.622	10.8%	Nontarget
CDCA7	Cdca7	0.337	26.0%	DAZL.target
CDCA7L	Cdca7l	0.28	31.6%	DAZL.target
CDCA8	Cdca8	0.535	13.9%	DAZL.target
CDH1	Cdh1	0.812	5.4%	Nontarget
CDH15	Cdh15	0.105	70.9%	Nontarget
CDH18	Cdh18	0.465	17.3%	Nontarget
CDH2	Cdh2	0.934	2.5%	Nontarget
CDH20	Cdh20	0.371	23.5%	Nontarget
CDH23	Cdh23	0.274	32.4%	Nontarget
CDH24	Cdh24	0.26	34.1%	Nontarget
CDH3	Cdh3	0.109	69.1%	Nontarget
CDH4	Cdh4	0.115	66.3%	Nontarget
CDH5	Cdh5	0.462	17.5%	Nontarget
CDIPT	Cdipt	0.116	66.2%	Nontarget
CDK10	Cdk10	0.154	53.2%	Nontarget
CDK2	Cdk2	1	0.0%	DAZL.target
CDK2AP2	Cdk2ap2	0.426	19.4%	Nontarget
CDK4	Cdk4	1	0.1%	Nontarget
CDK5	Cdk5	0.524	14.5%	Nontarget
CDK5R1	Cdk5r1	0.445	18.3%	Nontarget
CDK5RAP1	Cdk5rap1	0.09	77.2%	Nontarget
CDK5RAP2	Cdk5rap2	0.035	97.4%	Nontarget
CDK5RAP3	Cdk5rap3	0.198	43.5%	Nontarget
CDK6	Cdk6	0.997	0.4%	DAZL.target
CDK7	Cdk7	0.72	7.8%	Nontarget
CDK8	Cdk8	0.809	5.5%	DAZL.target
CDK9	Cdk9	0.479	16.7%	DAZL.target
CDKAL1	Cdkal1	0.195	43.9%	Nontarget
CDKL2	Cdkl2	0.088	77.8%	Nontarget
CDKL3	Cdkl3	0.151	53.9%	Nontarget
CDKL5	Cdkl5	0.432	19.1%	Nontarget
CDKN1A	Cdkn1a	0.98	1.2%	Nontarget
CDKN1B	Cdkn1b	0.809	5.5%	DAZL.target
CDKN1C	Cdkn1c	0.688	8.7%	Nontarget
CDKN2AIP	Cdkn2aip	0.58	12.3%	Nontarget
CDKN2AIPNL	Cdkn2aipnl	0.1	72.8%	DAZL.target
CDKN2B	Cdkn2b	0.479	16.7%	Nontarget
CDKN2C	Cdkn2c	0.795	5.8%	Nontarget
CDKN2D	Cdkn2d	0.229	38.4%	Nontarget
CDKN3	Cdkn3	0.595	11.8%	Nontarget
CDO1	Cdo1	0.211	41.1%	Nontarget
CDON	Cdon	0.108	69.2%	DAZL.target
CDR2	Cdr2	0.184	46.2%	Nontarget
CDR2L	Cdr2l	0.105	70.7%	Nontarget
CDS1	Cds1	0.113	67.2%	Nontarget
CDS2	Cds2	0.073	84.8%	DAZL.target
CDT1	Cdt1	0.97	1.6%	DAZL.target
CDV3	Cdv3	0.068	87.1%	Nontarget
CDYL	Cdyl	0.416	20.1%	DAZL.target
CDYL2	Cdyl2	0.484	16.4%	Nontarget
CEACAM18	Ceacam18	0.073	85.0%	Nontarget
CEACAM19	Ceacam19	0.119	65.2%	Nontarget
CEACAM20	Ceacam20	0.08	82.0%	Nontarget
CEBPB	Cebpb	0.988	0.9%	DAZL.target
CEBPG	Cebpg	0.244	36.2%	Nontarget
CEBPZ	Cebpz	0.828	5.1%	Nontarget
CECR2	Cecr2	0.145	55.6%	DAZL.target
CELSR1	Celsr1	0.415	20.2%	Nontarget
CELSR2	Celsr2	0.189	45.1%	Nontarget
CEND1	Cend1	0.102	71.9%	Nontarget
CENPA	Cenpa	0.648	9.9%	DAZL.target
CENPB	Cenpb	0.559	12.9%	Nontarget
CENPE	Cenpe	0.774	6.4%	Nontarget
CENPF	Cenpf	0.816	5.3%	DAZL.target
CENPH	Cenph	0.134	59.3%	Nontarget
CENPI	Cenpi	0.049	93.9%	Nontarget
CENPJ	Cenpj	0.171	48.9%	Nontarget
CENPK	Cenpk	0.446	18.3%	Nontarget
CENPL	Cenpl	0.094	75.2%	Nontarget
CENPM	Cenpm	0.478	16.7%	Nontarget
CENPN	Cenpn	0.188	45.4%	Nontarget
CENPO	Cenpo	0.085	79.9%	Nontarget
CENPP	Cenpp	0.055	92.2%	Nontarget
CENPQ	Cenpq	0.147	55.1%	DAZL.target
CENPT	Cenpt	0.045	95.1%	Nontarget
CEP135	Cep135	0.558	13.0%	Nontarget
CEP152	Cep152	0.139	57.8%	Nontarget
CEP164	Cep164	0.339	25.8%	Nontarget
CEP170	Cep170	0.444	18.4%	DAZL.target
CEP192	Cep192	0.08	82.1%	Nontarget
CEP250	Cep250	0.12	64.7%	Nontarget
CEP290	Cep290	0.38	22.7%	Nontarget
CEP350	Cep350	0.404	20.9%	Nontarget
CEP55	Cep55	0.378	22.9%	DAZL.target
CEP57	Cep57	0.425	19.5%	Nontarget
CEP63	Cep63	0.141	57.1%	Nontarget
CEP68	Cep68	0.052	92.9%	Nontarget
CEP70	Cep70	0.286	30.9%	Nontarget
CEP72	Cep72	0.069	86.7%	DAZL.target
CEP76	Cep76	0.112	67.7%	Nontarget
CEP78	Cep78	0.177	47.5%	Nontarget
CEP97	Cep97	0.327	26.9%	Nontarget
CEPT1	Cept1	0.128	61.4%	Nontarget
CER1	Cer1	0.257	34.6%	Nontarget
CERCAM	Cercam	0.062	89.4%	Nontarget
CERK	Cerk	0.175	48.1%	Nontarget
CERKL	Cerkl	0.265	33.5%	Nontarget
CETN1	Cetn1	0.045	95.1%	Nontarget
CETN2	Cetn2	0.206	42.1%	DAZL.target
CETN3	Cetn3	0.949	2.2%	DAZL.target
CFDP1	Cfdp1	0.6	11.5%	DAZL.target
CFL1	Cfl1	0.312	28.3%	Nontarget
CFL2	Cfl2	0.488	16.2%	DAZL.target
CFLAR	Cflar	0.094	75.3%	Nontarget
CFP	Cfp	0.122	64.0%	Nontarget
CFTR	Cftr	0.687	8.7%	Nontarget
CGGBP1	Cggbp1	0.183	46.4%	Nontarget
CGN	Cgn	0.125	62.6%	Nontarget
CGNL1	Cgnl1	0.111	68.4%	Nontarget
CGRRF1	Cgrrf1	0.045	95.2%	Nontarget
CHAC1	Chac1	0.385	22.3%	Nontarget
CHAC2	Chac2	0.081	81.7%	Nontarget
CHAD	Chad	0.27	32.9%	Nontarget
CHAF1A	Chaf1a	0.906	3.2%	Nontarget
CHAF1B	Chaf1b	0.618	10.9%	Nontarget
CHCHD1	Chchd1	0.068	87.0%	Nontarget
CHCHD2	Chchd2	0.017	99.4%	DAZL.target
CHCHD3	Chchd3	0.097	74.1%	Nontarget
CHCHD5	Chchd5	0.045	95.0%	Nontarget
CHCHD6	Chchd6	0.102	72.1%	Nontarget
CHCHD7	Chchd7	0.163	50.9%	Nontarget
CHD1	Chd1	0.815	5.4%	Nontarget
CHD1L	Chd1l	0.147	55.1%	Nontarget
CHD3	Chd3	0.774	6.4%	Nontarget
CHD5	Chd5	0.244	36.2%	Nontarget
CHD6	Chd6	0.783	6.2%	DAZL.target
CHD7	Chd7	0.121	64.3%	DAZL.target
CHD8	Chd8	0.637	10.3%	Nontarget
CHD9	Chd9	0.812	5.4%	Nontarget
CHEK1	Chek1	0.995	0.6%	Nontarget
CHEK2	Chek2	0.987	1.0%	Nontarget
CHERP	Cherp	0.212	41.0%	DAZL.target
CHFR	Chfr	0.078	83.0%	DAZL.target
CHGA	Chga	0.408	20.6%	Nontarget
CHI3L1	Chil1	0.132	60.1%	Nontarget
CHIC1	Chic1	0.302	29.2%	Nontarget
CHIC2	Chic2	0.654	9.7%	DAZL.target
CHID1	Chid1	0.144	55.9%	Nontarget
CHIT1	Chit1	0.09	77.0%	Nontarget
CHKA	Chka	0.17	49.1%	Nontarget
CHKB	Chkb	0.097	74.0%	Nontarget
CHM	Chm	0.11	68.5%	Nontarget
CHML	Chml	0.124	63.2%	DAZL.target
CHMP1A	Chmp1a	0.074	84.5%	DAZL.target
CHMP2A	Chmp2a	0.105	70.5%	Nontarget
CHMP2B	Chmp2b	0.281	31.4%	Nontarget
CHMP4B	Chmp4b	0.577	12.3%	DAZL.target
CHMP4C	Chmp4c	0.204	42.5%	Nontarget
CHMP5	Chmp5	0.609	11.2%	Nontarget
CHMP6	Chmp6	0.233	37.8%	Nontarget
CHMP7	Chmp7	0.101	72.4%	DAZL.target
CHN1	Chn1	0.238	37.1%	DAZL.target
CHORDC1	Chordc1	0.537	13.8%	DAZL.target
CHPF	Chpf	0.114	66.9%	Nontarget
CHPT1	Chpt1	0.071	85.8%	Nontarget
CHRAC1	Chrac1	0.125	62.7%	Nontarget
CHRDL1	Chrdl1	0.347	25.2%	Nontarget
CHRDL2	Chrdl2	0.277	31.9%	Nontarget
CHRNA1	Chrna1	0.091	76.9%	Nontarget
CHRNA10	Chrna10	0.031	98.1%	Nontarget
CHRNA4	Chrna4	0.104	70.9%	Nontarget
CHRNA5	Chrna5	0.065	88.3%	Nontarget
CHRNB1	Chrnb1	0.313	28.2%	Nontarget
CHRNB2	Chrnb2	0.169	49.3%	Nontarget
CHRNB4	Chrnb4	0.128	61.5%	Nontarget
CHST10	Chst10	0.088	78.1%	Nontarget
CHST11	Chst11	0.247	35.9%	Nontarget
CHST12	Chst12	0.133	59.9%	Nontarget
CHST14	Chst14	0.252	35.2%	Nontarget
CHST3	Chst3	0.193	44.4%	Nontarget
CHST8	Chst8	0.828	5.1%	Nontarget
CHSY1	Chsy1	0.325	27.1%	DAZL.target
CHTF18	Chtf18	0.961	1.8%	Nontarget
CHUK	Chuk	0.833	5.0%	DAZL.target
CHURC1	Churc1	0.145	55.8%	Nontarget
CIAO1	Ciao1	0.219	39.8%	DAZL.target
CIAPIN1	Ciapin1	0.107	69.8%	DAZL.target
CIB1	Cib1	0.145	55.7%	DAZL.target
CIB2	Cib2	0.313	28.2%	Nontarget
CIC	Cic	0.191	44.7%	Nontarget
CILP	Cilp	0.219	39.8%	Nontarget
CILP2	Cilp2	0.133	59.9%	Nontarget
CIRBP	Cirbp	0.117	65.7%	DAZL.target
CISD1	Cisd1	0.45	18.1%	Nontarget
CISD2	Cisd2	0.152	53.6%	Nontarget
CISH	Cish	0.452	18.0%	Nontarget
CIT	Cit	0.331	26.5%	Nontarget
CITED1	Cited1	0.353	24.7%	Nontarget
CITED2	Cited2	0.674	9.1%	DAZL.target
CIZ1	Ciz1	0.085	79.5%	DAZL.target
CKAP2	Ckap2	0.29	30.4%	DAZL.target
CKAP2L	Ckap2l	0.04	96.4%	Nontarget
CKAP4	Ckap4	0.346	25.2%	Nontarget
CKAP5	Ckap5	0.792	5.9%	DAZL.target
CKB	Ckb	0.442	18.5%	Nontarget
CKLF	Cklf	0.106	70.3%	Nontarget
CKS1B	Cks1b	0.912	3.0%	DAZL.target
CKS2	Cks2	0.949	2.2%	Nontarget
CLASP1	Clasp1	0.239	37.0%	DAZL.target
CLASP2	Clasp2	0.382	22.5%	DAZL.target
CLCC1	Clcc1	0.112	67.9%	Nontarget
CLCF1	Clcf1	0.315	28.0%	Nontarget
CLCN1	Clcn1	0.356	24.5%	Nontarget
CLCN2	Clcn2	0.159	51.7%	Nontarget
CLCN3	Clcn3	0.412	20.4%	Nontarget
CLCN5	Clcn5	0.457	17.7%	Nontarget
CLCN6	Clcn6	0.381	22.6%	Nontarget
CLCN7	Clcn7	0.208	41.6%	Nontarget
CLDN12	Cldn12	0.434	19.0%	Nontarget
CLDN20	Cldn20	0.078	82.9%	Nontarget
CLDN3	Cldn3	0.158	52.0%	Nontarget
CLDND1	Cldnd1	0.525	14.4%	DAZL.target
CLEC11A	Clec11a	0.212	41.0%	Nontarget
CLEC16A	Clec16a	0.279	31.7%	Nontarget
CLGN	Clgn	0.141	57.1%	Nontarget
CLIC1	Clic1	0.46	17.6%	Nontarget
CLIC4	Clic4	0.399	21.2%	DAZL.target
CLIC5	Clic5	0.209	41.5%	Nontarget
CLIC6	Clic6	0.076	83.7%	DAZL.target
CLINT1	Clint1	0.606	11.3%	DAZL.target
CLIP1	Clip1	0.413	20.3%	Nontarget
CLIP2	Clip2	0.109	69.0%	Nontarget
CLIP3	Clip3	0.248	35.8%	Nontarget
CLIP4	Clip4	0.139	57.6%	Nontarget
CLK1	Clk1	0.404	20.9%	Nontarget
CLK2	Clk2	0.289	30.5%	Nontarget
CLK3	Clk3	0.173	48.4%	Nontarget
CLK4	Clk4	0.17	49.1%	Nontarget
CLMN	Clmn	0.145	55.7%	Nontarget
CLN6	Cln6	0.19	45.0%	Nontarget
CLN8	Cln8	0.112	67.6%	Nontarget
CLNS1A	Clns1a	0.096	74.5%	DAZL.target
CLOCK	Clock	0.354	24.6%	DAZL.target
CLP1	Clp1	0.136	58.9%	Nontarget
CLPB	Clpb	0.108	69.3%	Nontarget
CLPP	Clpp	0.16	51.6%	Nontarget
CLPTM1	Clptm1	0.524	14.4%	Nontarget
CLPTM1L	Clptm1l	0.181	46.7%	DAZL.target
CLPX	Clpx	0.417	20.1%	Nontarget
CLRN1	Clrn1	0.166	50.0%	Nontarget
CLSPN	Clspn	0.467	17.2%	Nontarget
CLSTN1	Clstn1	0.638	10.3%	DAZL.target
CLSTN2	Clstn2	0.41	20.5%	Nontarget
CLSTN3	Clstn3	0.301	29.3%	Nontarget
CLTA	Clta	0.153	53.3%	DAZL.target
CLTB	Cltb	0.362	24.1%	Nontarget
CLTC	Cltc	0.59	11.9%	DAZL.target
CLU	Clu	0.111	68.0%	Nontarget
CLYBL	Clybl	0.159	51.8%	Nontarget
CMAS	Cmas	0.295	29.9%	DAZL.target
CMBL	Cmbl	0.091	76.8%	Nontarget
CMKLR1	Cmklr1	0.042	95.9%	Nontarget
CMPK1	Cmpk1	0.179	47.2%	DAZL.target
CMTM3	Cmtm3	0.132	60.2%	Nontarget
CMTM4	Cmtm4	0.169	49.3%	Nontarget
CMTM6	Cmtm6	0.129	61.1%	DAZL.target
CMTM7	Cmtm7	0.089	77.7%	Nontarget
CMTM8	Cmtm8	0.084	80.0%	Nontarget
CMYA5	Cmya5	0.08	81.8%	Nontarget
CNDP2	Cndp2	0.243	36.5%	Nontarget
CNGA3	Cnga3	0.295	29.9%	Nontarget
CNGB1	Cngb1	0.68	8.9%	Nontarget
CNIH2	Cnih2	0.13	60.9%	Nontarget
CNIH4	Cnih4	0.67	9.2%	Nontarget
CNKSR2	Cnksr2	0.681	8.9%	Nontarget
CNN2	Cnn2	0.127	62.0%	Nontarget
CNN3	Cnn3	0.383	22.4%	DAZL.target
CNNM1	Cnnm1	0.144	56.2%	Nontarget
CNNM2	Cnnm2	0.268	33.2%	Nontarget
CNNM3	Cnnm3	0.208	41.7%	Nontarget
CNNM4	Cnnm4	0.12	64.5%	Nontarget
CNOT1	Cnot1	0.417	20.1%	DAZL.target
CNOT10	Cnot10	0.167	49.8%	DAZL.target
CNOT2	Cnot2	0.243	36.4%	Nontarget
CNOT3	Cnot3	0.69	8.6%	Nontarget
CNOT4	Cnot4	0.56	12.9%	Nontarget
CNOT6	Cnot6	0.424	19.6%	DAZL.target
CNOT6L	Cnot6l	0.414	20.3%	DAZL.target
CNOT7	Cnot7	0.763	6.8%	DAZL.target
CNOT8	Cnot8	0.639	10.2%	Nontarget
CNP	Cnp	0.156	52.5%	Nontarget
CNPY3	Cnpy3	0.063	89.0%	Nontarget
CNPY4	Cnpy4	0.107	69.7%	Nontarget
CNR1	Cnr1	0.382	22.5%	Nontarget
CNR2	Cnr2	0.111	68.1%	Nontarget
CNRIP1	Cnrip1	0.486	16.3%	Nontarget
CNTD1	Cntd1	0.099	73.1%	DAZL.target
CNTFR	Cntfr	0.378	22.8%	Nontarget
CNTLN	Cntln	0.17	49.1%	Nontarget
CNTN3	Cntn3	0.224	39.1%	Nontarget
CNTN6	Cntn6	0.375	23.1%	Nontarget
CNTNAP2	Cntnap2	0.476	16.8%	Nontarget
CNTROB	Cntrob	0.08	82.0%	Nontarget
COASY	Coasy	0.02	99.2%	Nontarget
COBL	Cobl	0.3	29.4%	Nontarget
COBLL1	Cobll1	0.563	12.8%	Nontarget
COCH	Coch	0.422	19.7%	Nontarget
COG1	Cog1	0.133	59.8%	Nontarget
COG2	Cog2	0.118	65.3%	DAZL.target
COG3	Cog3	0.212	40.9%	Nontarget
COG4	Cog4	0.23	38.2%	Nontarget
COG5	Cog5	0.6	11.5%	Nontarget
COG6	Cog6	0.159	51.7%	Nontarget
COG7	Cog7	0.112	67.6%	Nontarget
COIL	Coil	0.317	27.8%	Nontarget
COL13A1	Col13a1	0.232	38.0%	Nontarget
COL14A1	Col14a1	0.135	59.1%	Nontarget
COL17A1	Col17a1	0.221	39.5%	Nontarget
COL18A1	Col18a1	0.272	32.7%	Nontarget
COL1A1	Col1a1	0.992	0.8%	Nontarget
COL1A2	Col1a2	0.999	0.3%	Nontarget
COL23A1	Col23a1	0.063	89.2%	Nontarget
COL25A1	Col25a1	0.132	60.4%	Nontarget
COL2A1	Col2a1	0.96	1.9%	Nontarget
COL3A1	Col3a1	0.997	0.5%	Nontarget
COL4A1	Col4a1	0.828	5.1%	Nontarget
COL4A2	Col4a2	0.239	36.9%	Nontarget
COL5A1	Col5a1	0.627	10.6%	Nontarget
COL5A3	Col5a3	0.44	18.7%	Nontarget
COL6A1	Col6a1	0.653	9.8%	Nontarget
COL6A2	Col6a2	0.496	15.8%	Nontarget
COL6A3	Col6a3	0.95	2.1%	Nontarget
COL8A1	Col8a1	0.376	23.1%	Nontarget
COL9A2	Col9a2	0.104	71.0%	Nontarget
COLEC12	Colec12	0.224	39.0%	Nontarget
COMMD10	Commd10	0.201	42.9%	Nontarget
COMMD2	Commd2	0.148	54.7%	Nontarget
COMMD3	Commd3	0.301	29.2%	Nontarget
COMMD4	Commd4	0.096	74.4%	Nontarget
COMMD5	Commd5	0.067	87.5%	Nontarget
COMMD6	Commd6	0.36	24.3%	Nontarget
COMMD8	Commd8	0.107	69.7%	DAZL.target
COMMD9	Commd9	0.088	78.0%	Nontarget
COMP	Comp	0.623	10.8%	Nontarget
COMT	Comt	0.113	67.2%	Nontarget
COMTD1	Comtd1	0.211	41.1%	Nontarget
COPA	Copa	0.119	65.1%	DAZL.target
COPB1	Copb1	0.481	16.5%	DAZL.target
COPB2	Copb2	0.492	16.0%	DAZL.target
COPE	Cope	0.194	44.2%	Nontarget
COPS2	Cops2	0.766	6.7%	Nontarget
COPS3	Cops3	0.426	19.5%	Nontarget
COPS4	Cops4	0.428	19.4%	Nontarget
COPS5	Cops5	0.968	1.6%	Nontarget
COPS6	Cops6	0.408	20.7%	Nontarget
COPS7A	Cops7a	0.486	16.2%	Nontarget
COPS7B	Cops7b	0.431	19.1%	DAZL.target
COPS8	Cops8	0.239	37.0%	DAZL.target
COPZ1	Copz1	0.134	59.4%	Nontarget
COPZ2	Copz2	0.273	32.6%	Nontarget
COQ10A	Coq10a	0.203	42.6%	Nontarget
COQ10B	Coq10b	0.105	70.7%	DAZL.target
COQ2	Coq2	0.094	75.4%	Nontarget
COQ3	Coq3	0.27	32.9%	Nontarget
COQ4	Coq4	0.125	62.8%	Nontarget
COQ5	Coq5	0.063	88.9%	Nontarget
COQ6	Coq6	0.13	60.8%	Nontarget
COQ7	Coq7	0.153	53.3%	Nontarget
COQ9	Coq9	0.11	68.5%	Nontarget
CORO1A	Coro1a	0.785	6.1%	Nontarget
CORO1B	Coro1b	0.521	14.6%	Nontarget
CORO1C	Coro1c	0.915	3.0%	Nontarget
CORO2A	Coro2a	0.125	62.8%	Nontarget
COTL1	Cotl1	0.179	47.2%	Nontarget
COX10	Cox10	0.031	98.0%	Nontarget
COX11	Cox11	0.086	79.3%	DAZL.target
COX15	Cox15	0.343	25.4%	DAZL.target
COX18	Cox18	0.054	92.3%	Nontarget
COX19	Cox19	0.027	98.5%	Nontarget
COX4I1	Cox4i1	0.11	68.7%	Nontarget
COX5A	Cox5a	0.109	69.2%	Nontarget
COX6A1	Cox6a1	0.367	23.8%	Nontarget
COX6B1	Cox6b1	0.104	71.3%	Nontarget
COX6B2	Cox6b2	0.065	88.2%	Nontarget
COX6C	Cox6c	0.161	51.3%	Nontarget
COX7A1	Cox7a1	0.103	71.5%	Nontarget
COX7A2	Cox7a2	0.126	62.3%	Nontarget
COX7A2L	Cox7a2l	0.132	60.4%	DAZL.target
COX7B	Cox7b	0.068	86.8%	Nontarget
COX7B2	Cox7b2	0.063	89.1%	Nontarget
COX7C	Cox7c	0.001	100.0%	Nontarget
COX8A	Cox8a	0.041	96.2%	Nontarget
COX8C	Cox8b	0.061	90.0%	Nontarget
CP	Cp	0.338	25.9%	Nontarget
CPD	Cpd	0.797	5.8%	Nontarget
CPE	Cpe	0.625	10.7%	Nontarget
CPEB2	Cpeb2	0.12	64.5%	Nontarget
CPEB3	Cpeb3	0.712	8.0%	DAZL.target
CPEB4	Cpeb4	0.596	11.7%	DAZL.target
CPLX2	Cplx2	0.293	30.1%	Nontarget
CPM	Cpm	0.135	59.2%	Nontarget
CPN1	Cpn1	0.094	75.2%	Nontarget
CPNE2	Cpne2	0.16	51.5%	Nontarget
CPNE3	Cpne3	0.276	32.1%	Nontarget
CPNE5	Cpne5	0.221	39.4%	Nontarget
CPNE7	Cpne7	0.085	79.7%	Nontarget
CPNE8	Cpne8	0.085	79.6%	Nontarget
CPNE9	Cpne9	0.209	41.4%	Nontarget
CPOX	Cpox	0.483	16.4%	DAZL.target
CPSF1	Cpsf1	0.219	39.8%	Nontarget
CPSF2	Cpsf2	0.158	52.0%	Nontarget
CPSF3	Cpsf3	0.145	55.8%	DAZL.target
CPSF4	Cpsf4	0.265	33.6%	DAZL.target
CPSF4L	Cpsf4l	0.123	63.5%	Nontarget
CPSF6	Cpsf6	0.405	20.8%	DAZL.target
CPT1A	Cpt1a	0.102	72.1%	Nontarget
CPT1C	Cpt1c	0.174	48.2%	Nontarget
CPT2	Cpt2	0.115	66.5%	Nontarget
CPVL	Cpvl	0.061	89.8%	Nontarget
CPXM1	Cpxm1	0.154	53.2%	Nontarget
CPXM2	Cpxm2	0.229	38.4%	Nontarget
CPZ	Cpz	0.213	40.8%	Nontarget
CR1	Cr1l	0.075	84.1%	Nontarget
CRABP1	Crabp1	0.402	21.0%	DAZL.target
CRABP2	Crabp2	0.714	8.0%	Nontarget
CRADD	Cradd	0.148	54.7%	Nontarget
CRAT	Crat	0.082	81.2%	Nontarget
CRB2	Crb2	0.115	66.5%	Nontarget
CRBN	Crbn	0.168	49.5%	Nontarget
CREB1	Creb1	0.995	0.6%	DAZL.target
CREB3	Creb3	0.176	47.7%	Nontarget
CREB3L1	Creb3l1	0.5	15.6%	Nontarget
CREB3L2	Creb3l2	0.22	39.6%	Nontarget
CREB3L4	Creb3l4	0.042	95.9%	Nontarget
CREBBP	Crebbp	1	0.0%	Nontarget
CREBL2	Crebl2	0.412	20.4%	Nontarget
CREBZF	Crebzf	0.303	29.1%	Nontarget
CREG1	Creg1	0.502	15.5%	Nontarget
CREG2	Creg2	0.085	79.8%	Nontarget
CRELD1	Creld1	0.078	82.7%	Nontarget
CRELD2	Creld2	0.196	43.7%	DAZL.target
CREM	Crem	0.763	6.8%	Nontarget
CRIM1	Crim1	0.213	40.7%	DAZL.target
CRIP2	Crip2	0.221	39.5%	DAZL.target
CRIPT	Cript	0.124	63.0%	Nontarget
CRISPLD1	Crispld1	0.412	20.4%	Nontarget
CRISPLD2	Crispld2	0.805	5.6%	Nontarget
CRK	Crk	0.72	7.8%	DAZL.target
CRKL	Crkl	0.942	2.4%	DAZL.target
CRLF1	Crlf1	0.346	25.3%	Nontarget
CRLF3	Crlf3	0.394	21.7%	DAZL.target
CRLS1	Crls1	0.116	66.0%	Nontarget
CRMP1	Crmp1	0.424	19.6%	Nontarget
CRNKL1	Crnkl1	0.257	34.6%	DAZL.target
CROT	Crot	0.075	84.4%	DAZL.target
CRP	Crp	0.044	95.3%	Nontarget
CRTAC1	Crtac1	0.116	66.3%	Nontarget
CRTAM	Crtam	0.168	49.6%	Nontarget
CRTAP	Crtap	0.128	61.4%	Nontarget
CRTC1	Crtc1	0.205	42.2%	Nontarget
CRTC2	Crtc2	0.208	41.6%	Nontarget
CRTC3	Crtc3	0.118	65.5%	Nontarget
CRX	Crx	0.769	6.6%	Nontarget
CRY1	Cry1	0.531	14.1%	DAZL.target
CRY2	Cry2	0.356	24.5%	DAZL.target
CRYAB	Cryab	0.444	18.4%	Nontarget
CRYBB3	Crybb3	0.1	72.6%	Nontarget
CRYGS	Crygs	0.103	71.4%	Nontarget
CRYL1	Cryl1	0.11	68.5%	Nontarget
CRYZ	Cryz	0.091	76.8%	Nontarget
CRYZL1	Cryzl1	0.082	80.9%	Nontarget
CSAD	Csad	0.171	48.9%	Nontarget
CSDC2	Csdc2	0.144	56.1%	Nontarget
CSDE1	Csde1	0.62	10.9%	DAZL.target
CSE1L	Cse1l	0.942	2.4%	DAZL.target
CSF1	Csf1	0.142	56.6%	Nontarget
CSF2RA	Csf2ra	0.207	41.8%	Nontarget
CSF3R	Csf3r	0.136	58.7%	Nontarget
CSGALNACT2	Csgalnact2	0.309	28.4%	Nontarget
CSK	Csk	0.685	8.8%	DAZL.target
CSNK1A1	Csnk1a1	0.549	13.3%	DAZL.target
CSNK1D	Csnk1d	0.95	2.1%	DAZL.target
CSNK1G1	Csnk1g1	0.463	17.4%	DAZL.target
CSNK1G2	Csnk1g2	0.506	15.3%	Nontarget
CSNK1G3	Csnk1g3	0.372	23.3%	Nontarget
CSNK2A2	Csnk2a2	0.997	0.5%	DAZL.target
CSPG5	Cspg5	0.408	20.7%	Nontarget
CSPP1	Cspp1	0.072	85.6%	Nontarget
CSRP1	Csrp1	0.237	37.3%	Nontarget
CSRP2	Csrp2	0.354	24.6%	Nontarget
CST9L	Cst9	0.086	79.3%	DAZL.target
CSTB	Cstb	0.125	62.6%	Nontarget
CSTF1	Cstf1	0.255	34.8%	Nontarget
CSTF2	Cstf2	0.225	38.9%	DAZL.target
CSTF2T	Cstf2t	0.099	73.3%	DAZL.target
CSTF3	Cstf3	0.555	13.1%	DAZL.target
CTBP1	Ctbp1	0.993	0.7%	DAZL.target
CTBP2	Ctbp2	0.402	21.0%	DAZL.target
CTBS	Ctbs	0.078	82.8%	Nontarget
CTCF	Ctcf	0.717	7.9%	Nontarget
CTCFL	Ctcfl	0.108	69.6%	Nontarget
CTDP1	Ctdp1	0.098	73.8%	Nontarget
CTDSP1	Ctdsp1	0.287	30.8%	Nontarget
CTDSP2	Ctdsp2	0.439	18.7%	DAZL.target
CTDSPL	Ctdspl	0.206	42.1%	Nontarget
CTDSPL2	Ctdspl2	0.165	50.2%	DAZL.target
CTF1	Ctf1	0.143	56.6%	Nontarget
CTH	Cth	0.19	45.0%	Nontarget
CTHRC1	Cthrc1	0.198	43.5%	DAZL.target
CTNNA1	Ctnna1	0.398	21.3%	DAZL.target
CTNNA2	Ctnna2	0.329	26.7%	Nontarget
CTNNAL1	Ctnnal1	0.185	46.1%	Nontarget
CTNNB1	Ctnnb1	1	0.1%	DAZL.target
CTNNBIP1	Ctnnbip1	0.184	46.2%	DAZL.target
CTNNBL1	Ctnnbl1	0.167	49.9%	Nontarget
CTNND2	Ctnnd2	0.335	26.1%	Nontarget
CTNS	Ctns	0.075	84.2%	DAZL.target
CTR9	Ctr9	0.356	24.5%	Nontarget
CTRL	Ctrl	0.107	70.1%	Nontarget
CTSA	Ctsa	0.76	6.9%	Nontarget
CTSB	Ctsb	0.122	63.8%	Nontarget
CTSC	Ctsc	0.196	43.8%	Nontarget
CTSF	Ctsf	0.109	68.9%	Nontarget
CTSK	Ctsk	0.299	29.5%	Nontarget
CTSO	Ctso	0.201	42.9%	Nontarget
CTSZ	Ctsz	0.08	81.7%	Nontarget
CTTN	Cttn	0.217	40.1%	Nontarget
CTTNBP2NL	Cttnbp2nl	0.19	44.9%	DAZL.target
CTXN1	Ctxn1	0.18	47.0%	Nontarget
CTXN3	Ctxn3	0.524	14.5%	Nontarget
CUBN	Cubn	0.143	56.4%	Nontarget
CUEDC2	Cuedc2	0.228	38.5%	Nontarget
CUL1	Cul1	0.447	18.2%	DAZL.target
CUL2	Cul2	0.681	8.9%	DAZL.target
CUL3	Cul3	0.202	42.8%	DAZL.target
CUL4A	Cul4a	0.519	14.7%	DAZL.target
CUL4B	Cul4b	0.811	5.5%	DAZL.target
CUL5	Cul5	0.218	40.0%	Nontarget
CUL7	Cul7	0.136	58.5%	Nontarget
CUTA	Cuta	0.161	51.4%	Nontarget
CUTC	Cutc	0.111	68.2%	Nontarget
CUX1	Cux1	0.784	6.2%	Nontarget
CUX2	Cux2	0.218	40.0%	Nontarget
CWC15	Cwc15	0.271	32.9%	DAZL.target
CWF19L1	Cwf19l1	0.149	54.5%	Nontarget
CWF19L2	Cwf19l2	0.16	51.5%	DAZL.target
CX3CL1	Cx3cl1	0.112	67.9%	Nontarget
CX3CR1	Cx3cr1	0.259	34.3%	Nontarget
CXCL11	Cxcl11	0.329	26.7%	Nontarget
CXCL12	Cxcl12	0.543	13.6%	Nontarget
CXCL17	Cxcl17	0.119	65.0%	Nontarget
CXCR4	Cxcr4	0.888	3.7%	DAZL.target
CXCR6	Cxcr6	0.038	96.7%	Nontarget
CXorf38	1810030O07Rik	0.12	64.5%	Nontarget
CXorf56	C330007P06Rik	0.125	62.6%	Nontarget
CXorf58	Fam90a1b	0.104	71.1%	Nontarget
CXXC1	Cxxc1	0.117	65.6%	DAZL.target
CXXC4	Cxxc4	0.445	18.4%	Nontarget
CXXC5	Cxxc5	0.386	22.2%	DAZL.target
CYB561	Cyb561	0.181	46.7%	DAZL.target
CYB561D1	Cyb561d1	0.24	36.7%	Nontarget
CYB561D2	Cyb561d2	0.099	73.1%	Nontarget
CYB5A	Cyb5a	0.15	54.1%	Nontarget
CYB5B	Cyb5b	0.21	41.2%	Nontarget
CYB5D1	Cyb5d1	0.084	79.9%	Nontarget
CYB5D2	Cyb5d2	0.082	81.0%	Nontarget
CYB5R1	Cyb5r1	0.321	27.5%	Nontarget
CYB5R3	Cyb5r3	0.171	49.0%	Nontarget
CYB5R4	Cyb5r4	0.18	46.9%	Nontarget
CYBA	Cyba	0.225	38.9%	Nontarget
CYBRD1	Cybrd1	0.09	77.0%	Nontarget
CYC1	Cyc1	0.385	22.3%	Nontarget
CYFIP1	Cyfip1	0.153	53.3%	Nontarget
CYFIP2	Cyfip2	0.384	22.3%	Nontarget
CYHR1	Cyhr1	0.123	63.6%	DAZL.target
CYLD	Cyld	0.597	11.7%	Nontarget
CYP11A1	Cyp11a1	0.234	37.6%	Nontarget
CYP19A1	Cyp19a1	0.314	28.1%	Nontarget
CYP20A1	Cyp20a1	0.152	53.5%	Nontarget
CYP2E1	Cyp2e1	0.521	14.6%	Nontarget
CYP2R1	Cyp2r1	0.104	71.1%	Nontarget
CYP2S1	Cyp2s1	0.142	56.8%	Nontarget
CYP2U1	Cyp2u1	0.172	48.8%	Nontarget
CYP39A1	Cyp39a1	0.218	40.0%	Nontarget
CYP46A1	Cyp46a1	0.128	61.5%	Nontarget
CYP4V2	Cyp4v3	0.149	54.5%	Nontarget
CYP4X1	Cyp4x1	0.038	96.8%	Nontarget
CYP51A1	Cyp51	0.323	27.3%	DAZL.target
CYYR1	Cyyr1	0.201	43.0%	Nontarget
D2HGDH	D2hgdh	0.224	39.1%	Nontarget
DAAM1	Daam1	0.707	8.2%	Nontarget
DAAM2	Daam2	0.165	50.2%	Nontarget
DAB1	Dab1	0.542	13.7%	Nontarget
DAB2	Dab2	0.279	31.7%	Nontarget
DAB2IP	Dab2ip	0.415	20.2%	Nontarget
DACT1	Dact1	0.136	58.5%	DAZL.target
DACT2	Dact2	0.179	47.2%	Nontarget
DACT3	Dact3	0.351	24.9%	Nontarget
DAD1	Dad1	0.213	40.8%	Nontarget
DAG1	Dag1	0.266	33.4%	DAZL.target
DAGLA	Dagla	0.331	26.5%	Nontarget
DAGLB	Daglb	0.1	72.6%	Nontarget
DALRD3	Dalrd3	0.679	9.0%	DAZL.target
DAND5	Dand5	0.095	74.8%	Nontarget
DAP3	Dap3	0.245	36.1%	DAZL.target
DAPK1	Dapk1	0.148	54.9%	Nontarget
DAPK2	Dapk2	0.439	18.7%	Nontarget
DAPK3	Dapk3	0.113	67.4%	Nontarget
DAPP1	Dapp1	0.151	53.9%	Nontarget
DARS	Dars	0.548	13.4%	DAZL.target
DARS2	Dars2	0.282	31.3%	Nontarget
DAXX	Daxx	0.9	3.4%	Nontarget
DAZAP1	Dazap1	0.131	60.4%	DAZL.target
DAZAP2	Dazap2	0.147	55.2%	DAZL.target
DAZL	Dazl	0.318	27.7%	DAZL.target
DBF4	Dbf4	0.289	30.5%	DAZL.target
DBI	Dbi	0.011	99.7%	Nontarget
DBN1	Dbn1	0.196	43.8%	DAZL.target
DBNDD1	Dbndd1	0.231	38.1%	Nontarget
DBNDD2	Dbndd2	0.085	79.8%	Nontarget
DBNL	Dbnl	0.163	50.7%	Nontarget
DBP	Dbp	0.326	27.0%	Nontarget
DBR1	Dbr1	0.22	39.6%	Nontarget
DBT	Dbt	0.303	29.0%	Nontarget
DBX2	Dbx2	0.133	59.7%	Nontarget
DCAKD	Dcakd	0.197	43.7%	Nontarget
DCBLD1	Dcbld1	0.141	57.0%	Nontarget
DCBLD2	Dcbld2	0.146	55.3%	Nontarget
DCDC2	Dcdc2a	0.038	96.9%	Nontarget
DCHS1	Dchs1	0.273	32.5%	Nontarget
DCK	Dck	0.027	98.6%	DAZL.target
DCLK2	Dclk2	0.115	66.5%	Nontarget
DCLRE1A	Dclre1a	0.202	42.6%	Nontarget
DCLRE1B	Dclre1b	0.068	87.2%	Nontarget
DCLRE1C	Dclre1c	0.212	40.9%	Nontarget
DCN	Dcn	0.673	9.1%	Nontarget
DCP1A	Dcp1a	0.372	23.4%	DAZL.target
DCP1B	Dcp1b	0.076	84.0%	Nontarget
DCP2	Dcp2	0.379	22.8%	DAZL.target
DCPS	Dcps	0.233	37.8%	DAZL.target
DCTD	Dctd	0.172	48.7%	DAZL.target
DCTN2	Dctn2	0.684	8.8%	Nontarget
DCTN3	Dctn3	0.077	83.2%	Nontarget
DCTN4	Dctn4	0.339	25.8%	DAZL.target
DCTN5	Dctn5	0.283	31.3%	Nontarget
DCTN6	Dctn6	0.198	43.3%	DAZL.target
DCUN1D2	Dcun1d2	0.069	86.6%	Nontarget
DCUN1D3	Dcun1d3	0.631	10.5%	Nontarget
DCUN1D4	Dcun1d4	0.245	36.1%	Nontarget
DCUN1D5	Dcun1d5	0.499	15.7%	DAZL.target
DCXR	Dcxr	0.064	88.7%	Nontarget
DDA1	Dda1	0.129	61.2%	Nontarget
DDAH1	Ddah1	0.418	20.0%	Nontarget
DDAH2	Ddah2	0.169	49.4%	Nontarget
DDB1	Ddb1	0.327	26.9%	DAZL.target
DDB2	Ddb2	0.141	57.2%	Nontarget
DDC	Ddc	0.492	16.0%	Nontarget
DDHD1	Ddhd1	0.321	27.4%	DAZL.target
DDHD2	Ddhd2	0.091	76.8%	Nontarget
DDIT3	Ddit3	0.299	29.5%	Nontarget
DDIT4	Ddit4	0.381	22.6%	DAZL.target
[truncated: 7,660 more rows]

## Sheet: ExAC data
Human.gene.name	Mouse.gene.name	gene	chr	start	end	mean_rd	gc_content	complexity	cds_len	gene_length	num_targ	segdups	dip	del	dup	del.sing	dup.sing	del.sing.score	dup.sing.score	del.score	dup.score	cnv.score	flag	DAZL.target
AAMP	Aamp	ENSG00000127837.5	2	219128850	219134980	95.702	0.579254	131	1441	6130	11	0	58801	2	4	2	0	-0.975811	0.699973	-0.0817346	-0.0550237	-0.0508828	0	DAZL.target
AASDHPPT	Aasdhppt	ENSG00000149313.6	11	105946228	105969437	77.1954	0.425277	161	966	23209	6	0	59076	0	2	0	0	0.319176	0.344037	0.619062	0.201516	0.472595	0	DAZL.target
ABCD3	Abcd3	ENSG00000117528.7	1	94883933	94984222	77.2952	0.402646	89.5	2148	100289	24	0	59058	5	2	5	1	-2.13677	0.712188	-0.791493	0.758372	0.144851	0	DAZL.target
ABHD17A	Abhd17a	ENSG00000129968.11	19	1876809	1885546	35.5344	0.673539	221.5	886	8737	4	0	59116	0	0	0	0	-0.17351	-0.0794898	0.182825	0.624348	0.645418	0	DAZL.target
ABHD17C	Abhd17c	ENSG00000136379.7	15	80972025	81047962	46.2226	0.571141	333	999	75937	3	0	58775	0	0	0	0	-0.337328	-0.175217	0.0595247	0.506873	0.525253	0	DAZL.target
ABHD2	Abhd2	ENSG00000140526.12	15	89630690	89745591	92.487	0.516555	148	1332	114901	9	0	59083	0	1	0	0	0.604527	0.650451	0.797735	0.694597	0.929878	0	DAZL.target
ABI1	Abi1	ENSG00000136754.12	10	27035522	27150016	85.2143	0.453185	124.615	1620	114494	13	2	59075	0	8	0	1	1.11166	0.383896	1.65823	-0.198188	0.353452	1	DAZL.target
ABL2	Abl2	ENSG00000143322.15	1	179068462	179198819	96.2422	0.497123	311.333	3736	130357	12	0	59018	1	0	0	0	0.682753	0.689797	0.312085	1.09698	0.971116	0	DAZL.target
ACADM	Acadm	ENSG00000117054.9	1	76190036	76253260	86.6	0.411236	109.133	1637	63224	15	0	59052	1	3	1	0	0.108137	1.02819	0.556329	0.289831	0.472142	0	DAZL.target
ACBD3	Acbd3	ENSG00000182827.8	1	226332380	226374431	108.395	0.449279	196.333	1178	42051	6	0	59147	2	0	1	0	-0.283067	0.564318	-0.0532583	1.13963	0.771612	0	DAZL.target
ACLY	Acly	ENSG00000131473.12	17	40023161	40086795	87.2542	0.550562	125.414	3637	63634	29	0	58902	0	2	0	0	1.50905	1.55795	1.34316	0.862773	1.21151	0	DAZL.target
ACO2	Aco2	ENSG00000100412.11	22	41865129	41924993	95.3495	0.567214	140.222	2524	59864	18	0	59093	0	5	0	0	1.09017	1.09275	1.12315	-0.109127	0.334686	0	DAZL.target
ACSL3	Acsl3	ENSG00000123983.9	2	223725652	223809357	80.0737	0.412281	160.5	2247	83705	14	0	59209	8	1	7	1	-2.84641	0.090431	-1.97875	0.781194	-0.497956	0	DAZL.target
ACSS2	Acss2	ENSG00000131069.15	20	33459949	33515769	122.031	0.525402	111.421	2117	55820	19	0	59015	27	7	4	3	-1.51681	-0.646895	-2.62354	-0.201292	-1.90396	0	DAZL.target
ACTN1	Actn1	ENSG00000072110.9	14	69340860	69446157	79.4268	0.569541	166.19	3490	105297	21	0	59170	2	4	2	4	-0.647686	-1.47024	0.00733325	0.043414	0.0498836	0	DAZL.target
ACTR10	Actr10	ENSG00000131966.9	14	58666798	58701750	81.1159	0.421903	103.154	1341	34952	13	0	59007	1	8	0	0	0.812875	0.834295	0.409755	-0.882717	-0.490899	0	DAZL.target
ACTR6	Actr6	ENSG00000075089.5	12	100592900	100635643	88.9065	0.373795	113.4	1134	42743	10	0	59022	5	12	0	0	0.871304	0.835445	-1.05674	-1.46325	-1.29852	0	DAZL.target
ADAL	Adal	ENSG00000168803.10	15	43622872	43646096	67.9697	0.413325	116.9	1169	23224	10	0	59109	0	2	0	0	0.502931	0.549508	0.711448	0.287702	0.570068	0	DAZL.target
ADAM10	Adam10	ENSG00000137845.10	15	58887403	59042177	77.9844	0.415005	147.882	2514	154774	17	0	59018	1	1	1	1	0.110044	0.306348	0.484188	0.845006	0.858567	0	DAZL.target
ADD3	Add3	ENSG00000148700.9	10	111756126	111895323	91.8801	0.427462	157.5	2205	139197	14	0	58985	0	0	0	0	0.979506	1.00429	1.05192	1.23728	1.47749	0	DAZL.target
ADI1	Adi1	ENSG00000182551.9	2	3501132	3523507	58.1705	0.523208	222	666	22375	3	0	58985	1	7	0	0	-0.207958	-0.0957978	-0.340909	-1.26153	-1.06813	0	DAZL.target
ADIPOR2	Adipor2	ENSG00000006831.9	12	1797740	1897844	107.67	0.472524	171.857	1203	100104	7	0	59048	1	3	0	0	0.685821	0.664642	0.412929	0.171369	0.324255	0	DAZL.target
ADK	Adk	ENSG00000156110.9	10	75910960	76469061	70.0837	0.443523	97.9167	1175	558101	12	0	58978	0	0	0	0	0.971444	1.15716	0.836586	1.03104	1.23549	0	DAZL.target
ADNP	Adnp	ENSG00000101126.11	20	49505585	49547958	103.618	0.386948	1109	3327	42373	3	0	58925	1	0	0	0	0.183786	0.101708	0.0840862	0.739394	0.616928	0	DAZL.target
ADPRH	Adprh	ENSG00000144843.7	3	119298115	119308792	104.638	0.535962	364	1092	10677	3	0	58888	0	0	0	0	0.247198	0.204999	0.661608	0.928459	1.08557	0	DAZL.target
ADSS	Adss	ENSG00000035687.9	1	244571796	244615436	73.8955	0.402515	111.462	1449	43640	13	0	58939	0	2	0	0	0.7772	0.810632	0.901726	0.427199	0.747485	0	DAZL.target
AFF3	Aff3	ENSG00000144218.14	2	100162323	100759201	84.5234	0.509143	167.24	4181	596878	25	0	59154	0	1	0	1	1.64219	1.00074	1.25967	1.03111	1.34653	0	DAZL.target
AFG3L2	Afg3l2	ENSG00000141385.5	18	12328943	12377313	94.4706	0.460393	148.5	2376	48370	16	0	58964	4	5	3	0	-1.38664	0.994879	-0.67271	-0.167143	-0.339048	0	DAZL.target
AGFG1	Agfg1	ENSG00000173744.13	2	228336868	228425930	84.4769	0.46049	131.571	1842	89062	14	0	58531	9	5	8	0	-2.84641	0.877295	-2.25128	-0.307064	-1.09799	0	DAZL.target
AGPS	Agps	ENSG00000018510.8	2	178257372	178408564	78.9769	0.416534	104.85	2097	151192	20	0	59076	1	1	1	0	0.319329	1.30938	0.624326	0.963106	0.996609	0	DAZL.target
AHCTF1	Ahctf1	ENSG00000153207.10	1	247002400	247095280	75.8184	0.409368	200.457	7016	92880	35	0	58826	10	43	10	33	-2.84641	-2.87279	-1.96711	-2.53125	-2.47163	0	DAZL.target
AHCYL1	Ahcyl1	ENSG00000168710.13	1	110527308	110566357	92.1663	0.494309	99.7059	1695	39049	17	0	58936	5	3	5	3	-2.52788	-0.997393	-0.992076	0.347223	-0.179014	0	DAZL.target
AHDC1	Ahdc1	ENSG00000126705.9	1	27860546	27930942	68.3747	0.666113	4818	4818	70396	1	0	59297	0	0	0	0	-0.405416	-0.320247	-0.472671	-0.251176	-0.276078	0	DAZL.target
AJUBA	Ajuba	ENSG00000129474.11	14	23440383	23451851	112.169	0.541587	208.125	1665	11468	8	0	59040	0	2	0	0	0.680159	0.597977	0.979907	0.508908	0.824559	0	DAZL.target
AK2	Ak2	ENSG00000004455.12	1	33473585	33546597	87.4764	0.507331	813	5691	73012	7	0	58931	0	1	0	1	0.0330006	-0.745197	0.376053	0.318035	0.48532	0	DAZL.target
AK4	Ak4	ENSG00000162433.10	1	65613232	65697828	48.6542	0.499882	140.4	702	84596	5	0	59110	0	0	0	0	-0.105335	0.0594317	0.226387	0.649359	0.707531	0	DAZL.target
AKAP11	Akap11	ENSG00000023516.7	13	42846289	42897396	81.9795	0.399219	524.727	5772	51107	11	0	58997	6	0	1	0	-0.451523	0.420357	-1.71108	0.930196	-0.307614	0	DAZL.target
AKAP13	Akap13	ENSG00000170776.15	15	85923802	86292586	97.649	0.468456	235.568	8716	368784	37	2	59039	3	45	3	43	-0.00700141	-2.87279	0.958552	-2.53125	-1.67719	1	DAZL.target
AKAP8	Akap8	ENSG00000105127.4	19	15464196	15490609	60.0738	0.554454	162.231	2109	26413	13	0	58975	0	1	0	1	0.39007	-0.302109	0.565309	0.563521	0.732118	0	DAZL.target
AKIRIN1	Akirin1	ENSG00000174574.11	1	39456895	39471731	77.0192	0.412386	147	588	14836	4	0	58955	0	2	0	1	0.239996	-0.525828	0.579223	0.15888	0.427652	0	DAZL.target
AKT3	Akt3	ENSG00000117020.12	1	243651535	244014381	67.2637	0.405743	112	1568	362846	14	0	59056	5	3	5	3	-2.60549	-0.933114	-1.2035	0.105106	-0.433282	0	DAZL.target
ALDH1A2	Aldh1a2	ENSG00000128918.10	15	58245622	58790065	113.976	0.482709	125.667	1885	544443	15	0	58955	27	5	3	3	-0.84393	-0.463453	-2.62354	-0.00892704	-2.00798	0	DAZL.target
ALDH3A2	Aldh3a2	ENSG00000072210.14	17	19551449	19580911	103.273	0.448933	159.909	1759	29462	11	1	59019	5	13	3	1	-1.39739	0.160559	-0.70308	-1.24041	-1.02246	1	DAZL.target
ALKBH1	Alkbh1	ENSG00000100601.5	14	78138747	78174363	98.8461	0.516305	201	1206	35616	6	0	59030	0	13	0	1	0.431995	-0.36535	0.746429	-1.76744	-1.16709	0	DAZL.target
ALKBH5	Alkbh5	ENSG00000091542.8	17	18086392	18113268	115.169	0.590621	302.25	1209	26876	4	2	58797	1	6	0	1	0.793853	-0.0827178	1.07454	0.114719	0.425388	1	DAZL.target
ALS2	Als2	ENSG00000003393.10	2	202565277	202645912	93.0132	0.462375	161.97	5345	80635	33	0	58883	3	0	3	0	-0.649165	1.76923	0.113478	1.68855	1.13775	0	DAZL.target
AMFR	Amfr	ENSG00000159461.10	16	56395364	56459450	103.254	0.50539	194	2522	64086	13	0	58683	1	4	1	1	-0.0412959	0.0568228	0.498496	0.0131167	0.229468	0	DAZL.target
AMMECR1L	Ammecr1l	ENSG00000144233.5	2	128619204	128643496	79.8363	0.494989	161.5	969	24292	6	0	59070	0	0	0	0	0.242226	0.285108	0.552348	0.880088	1.01542	0	DAZL.target
AMPD2	Ampd2	ENSG00000116337.11	1	110158726	110174673	86.5624	0.596331	156.632	2976	15947	19	0	59094	0	4	0	0	1.0223	1.01671	1.04967	0.0772212	0.46565	0	DAZL.target
ANGEL1	Angel1	ENSG00000013523.5	14	77253588	77292589	86.8085	0.547233	230.667	2076	39001	9	0	58904	0	0	0	0	0.425707	0.440187	0.672981	0.982235	1.13162	0	DAZL.target
ANGEL2	Angel2	ENSG00000174606.8	1	213165524	213189168	85.3514	0.44882	201.625	1613	23644	8	0	58987	1	1	1	0	-0.468366	0.444342	0.179453	0.607456	0.567509	0	DAZL.target
ANKFY1	Ankfy1	ENSG00000185722.12	17	4067201	4167274	103.258	0.533865	153.72	3843	100073	25	0	58787	2	21	1	2	0.590352	0.0375234	0.407139	-2.05183	-1.37206	0	DAZL.target
ANKRD10	Ankrd10	ENSG00000088448.10	13	111530887	111567416	75.5916	0.508098	198.625	1589	36529	8	1	58789	0	2	0	0	0.414448	0.475407	0.87925	0.476434	0.740089	0	DAZL.target
ANKRD12	Ankrd12	ENSG00000101745.11	18	9136226	9285983	84.1975	0.389616	521.75	6261	149757	12	0	58952	0	11	0	0	0.623156	0.615035	0.765351	-1.53856	-0.948851	0	DAZL.target
ANKRD13C	Ankrd13c	ENSG00000118454.8	1	70726271	70820417	86.2158	0.426107	139	1668	94146	12	0	59060	0	8	0	2	0.804664	-0.625598	0.934978	-0.900939	-0.366692	0	DAZL.target
ANKRD29	Ankrd29	ENSG00000154065.12	18	21178890	21242849	54.1568	0.515755	126.222	1136	63959	9	0	59163	1	1	1	0	-0.740483	0.306744	-0.122411	0.431507	0.304081	0	DAZL.target
ANP32E	Anp32e	ENSG00000143401.10	1	150190717	150208504	116.318	0.413622	133.5	534	17787	4	0	58866	0	4	0	2	0.714951	-0.861311	1.0761	-0.0170579	0.429695	0	DAZL.target
ANXA7	Anxa7	ENSG00000138279.11	10	75134859	75173834	85.1902	0.47633	121.615	1581	38975	13	0	58913	2	0	2	0	-0.954217	0.774225	-0.106441	1.15284	0.755771	0	DAZL.target
AP1G1	Ap1g1	ENSG00000166747.8	16	71762913	71843104	98.6204	0.424633	107.6	2690	80191	25	0	59003	1	1	1	1	0.715003	0.836334	0.978398	1.25093	1.3422	0	DAZL.target
AP2A1	Ap2a1	ENSG00000196961.8	19	50270225	50310370	43.0055	0.591071	164.091	3610	40145	22	1	58972	0	0	0	0	0.830536	0.966184	1.03978	1.38832	1.52201	0	DAZL.target
APBA2	Apba2	ENSG00000034053.10	15	29129629	29410518	82.7435	0.557457	220.583	2647	280889	12	1	58950	1	10	1	9	-0.072354	-2.87279	0.542887	-1.05565	-0.625636	1	DAZL.target
APBB1IP	Apbb1ip	ENSG00000077420.11	10	26727132	26856732	97.3904	0.457664	172.538	2243	129600	13	1	58949	0	12	0	11	1.05582	-2.87279	1.36132	-1.13442	-0.468999	1	DAZL.target
APEX1	Apex1	ENSG00000100823.7	14	20923350	20925927	84.7345	0.530167	262.25	1049	2577	4	0	58529	0	2	0	0	0.104838	0.122519	0.481031	0.111386	0.339884	0	DAZL.target
API5	Api5	ENSG00000166181.8	11	43333513	43366079	78.2653	0.418095	122.4	1836	32566	15	0	59020	0	2	0	1	0.87163	0.110116	0.970595	0.493957	0.821631	0	DAZL.target
APLP2	Aplp2	ENSG00000084234.12	11	129939732	130014699	87.0809	0.504523	130.562	2089	74967	16	0	59064	1	2	0	0	0.907753	0.951775	0.444666	0.534632	0.60357	0	DAZL.target
APPBP2	Appbp2	ENSG00000062725.5	17	58520520	58603580	89.8298	0.405971	141.231	1836	83060	13	1	58868	0	5	0	1	1.08155	0.300336	1.38441	0.0508708	0.549403	1	DAZL.target
AQR	Aqr	ENSG00000021776.6	15	35147732	35262040	80.8996	0.414496	138.657	4853	114308	35	0	58924	1	4	1	0	0.918125	1.89593	1.00046	0.437021	0.726191	0	DAZL.target
ARCN1	Arcn1	ENSG00000095139.9	11	118443105	118473748	98.3407	0.435053	159.6	1596	30643	10	0	58911	0	2	0	0	0.765473	0.724704	0.98479	0.486042	0.823022	0	DAZL.target
ARF1	Arf1	ENSG00000143761.9	1	228270361	228286912	82.9165	0.574358	142.5	570	16551	4	0	59041	0	7	0	7	0.178319	-2.87279	0.513022	-1.01067	-0.605605	0	DAZL.target
ARF3	Arf3	ENSG00000134287.5	12	49329506	49351334	113.292	0.523543	142.5	570	21828	4	1	59039	1	2	0	0	0.666636	0.607178	0.694414	0.730814	0.820701	0	DAZL.target
ARF6	Arf6	ENSG00000165527.5	14	50359810	50361490	62.8305	0.560748	534	534	1680	1	0	58888	0	0	0	0	-0.372307	-0.269172	0.0947114	0.491549	0.530817	0	DAZL.target
ARFGAP3	Arfgap3	ENSG00000242247.6	22	43192508	43254112	84.2553	0.467008	101.733	1526	61604	15	0	59043	3	6	2	3	-0.808204	-1.12093	-0.428526	-0.461795	-0.449483	0	DAZL.target
ARGLU1	Arglu1	ENSG00000134884.9	13	107194021	107220512	71.1989	0.529181	246	984	26491	4	0	58785	0	0	0	0	-0.0256896	0.04727	0.340733	0.71594	0.805603	0	DAZL.target
ARHGAP1	Arhgap1	ENSG00000175220.7	11	46698630	46722165	72.5239	0.56943	127.917	1535	23535	12	0	59050	1	10	1	0	-0.392512	0.576769	0.150042	-1.35051	-0.971781	0	DAZL.target
ARHGAP17	Arhgap17	ENSG00000140750.12	16	24930706	25026987	90.9889	0.492962	148.632	2824	96281	19	0	59057	1	1	1	1	0.190319	0.3515	0.574667	0.958752	0.969005	0	DAZL.target
ARHGAP29	Arhgap29	ENSG00000137962.8	1	94614544	94740624	84.8899	0.38563	180.091	3962	126080	22	0	59032	0	0	0	0	1.36233	1.3697	1.27728	1.41494	1.69629	0	DAZL.target
ARHGAP32	Arhgap32	ENSG00000134909.14	11	128834955	129149219	78.3532	0.470156	292.727	6440	314264	22	0	59041	7	6	4	0	-1.88665	1.23748	-1.69892	-0.452809	-0.929455	0	DAZL.target
ARHGAP44	Arhgap44	ENSG00000006740.12	17	12692856	12894960	52.6515	0.512656	123.368	2344	202104	19	0	58856	0	5	0	0	0.763304	0.96273	0.734161	-0.406235	-0.0416836	0	DAZL.target
ARHGAP5	Arhgap5	ENSG00000100852.8	14	32545320	32628934	68.3979	0.382945	757.5	4545	83614	6	0	58970	0	3	0	0	0.0374838	0.0562934	0.371789	-0.359943	-0.0720193	0	DAZL.target
ARHGEF1	Arhgef1	ENSG00000076928.13	19	42387228	42434302	65.0828	0.609438	101.926	2752	47074	27	0	59045	1	2	1	0	0.356029	1.36194	0.584346	0.702128	0.755183	0	DAZL.target
ARHGEF11	Arhgef11	ENSG00000132694.14	1	156904632	157015162	85.732	0.549985	118.833	4991	110530	42	0	59004	1	2	1	1	1.10941	1.3439	1.09393	1.11798	1.25059	0	DAZL.target
ARHGEF2	Arhgef2	ENSG00000116584.13	1	155916630	155976861	76.1973	0.564924	148.45	2969	60231	20	0	58979	0	2	0	1	0.953449	0.232499	0.952147	0.545141	0.832039	0	DAZL.target
ARHGEF7	Arhgef7	ENSG00000102606.13	13	111766906	111958084	76.1608	0.476573	129.591	2851	191178	22	1	58980	0	2	0	2	1.31424	-0.0176957	1.40301	0.899615	1.24941	0	DAZL.target
ARID1A	Arid1a	ENSG00000117713.13	1	27022524	27108595	95.5296	0.550017	295.95	5919	86071	20	0	58893	1	1	0	1	1.03415	0.237849	0.514008	0.940812	0.92827	0	DAZL.target
ARID4B	Arid4b	ENSG00000054267.16	1	235294949	235491534	69.6045	0.401447	166.156	5317	196585	32	0	59001	2	5	1	0	0.726204	1.74622	0.352701	0.0505502	0.201386	0	DAZL.target
ARL2BP	Arl2bp	ENSG00000102931.3	16	57279010	57287516	104.173	0.443475	105.333	632	8506	6	0	58916	1	0	1	0	-0.283478	0.570549	0.402354	1.14997	1.05296	0	DAZL.target
ARL5A	Arl5a	ENSG00000162980.12	2	152645498	152685006	62.2858	0.387368	96	576	39508	6	0	59037	3	2	1	1	-0.597171	-0.412493	-0.817406	0.167654	-0.216541	0	DAZL.target
ARL5B	Arl5b	ENSG00000165997.4	10	18948334	18970568	74.1351	0.419706	96	576	22234	6	0	59065	1	3	0	0	0.342948	0.379773	0.0950418	-0.0688491	0.0310878	0	DAZL.target
ARL6IP1	Arl6ip1	ENSG00000170540.10	16	18802991	18813000	87.1097	0.465535	108.667	652	10009	6	0	58734	0	13	0	0	0.386895	0.396733	0.69106	-1.81683	-1.2189	0	DAZL.target
ARL6IP6	Arl6ip6	ENSG00000177917.6	2	153574407	153617767	81.1606	0.477111	194.75	779	43360	4	0	59091	1	1	0	0	0.155121	0.202768	-0.0327542	0.446918	0.363194	0	DAZL.target
ARL8A	Arl8a	ENSG00000143862.3	1	202102532	202113869	88.0806	0.533199	86.1429	603	11337	7	0	59116	0	0	0	0	0.428153	0.447701	0.702256	1.01463	1.16969	0	DAZL.target
ARNTL	Arntl	ENSG00000133794.13	11	13298199	13408813	91.4333	0.447465	131.938	2111	110614	16	0	59118	0	2	0	0	1.04627	1.07633	1.09386	0.593508	0.939404	0	DAZL.target
ARPC2	Arpc2	ENSG00000163466.11	2	219081817	219119079	78.8491	0.473904	102	1020	37262	10	0	59103	0	2	0	0	0.531161	0.583802	0.735502	0.33168	0.606943	0	DAZL.target
ARPC3	Arpc3	ENSG00000111229.11	12	110872630	110888227	88.3785	0.437091	82.7143	579	15597	7	0	58994	1	6	0	2	0.532154	-0.928413	0.264685	-0.628206	-0.339473	0	DAZL.target
ARPC5	Arpc5	ENSG00000162704.11	1	183592401	183604892	93.4332	0.491939	101	505	12491	5	0	59122	0	2	0	0	0.378462	0.377106	0.70514	0.297482	0.571461	0	DAZL.target
ARRDC4	Arrdc4	ENSG00000140450.7	15	98462784	98517068	90.9947	0.443739	141.714	992	54284	7	0	59084	3	3	2	1	-1.16858	-0.248657	-0.61427	0.0511533	-0.193236	0	DAZL.target
ASB3	Asb3	ENSG00000270898.1	2	53897430	54087297	93.3389	0.424967	180.667	1626	189867	9	0	59120	25	4	0	0	0.754079	0.793405	-2.62354	-0.139969	-2.28023	0	DAZL.target
ASB8	Asb8	ENSG00000177981.6	12	48541571	48574996	68.9447	0.488001	242	968	33425	4	0	58795	1	0	0	0	-0.0243971	0.0551568	-0.193437	0.706896	0.485501	0	DAZL.target
ATAD1	Atad1	ENSG00000138138.9	10	89511269	89601100	81.1496	0.402867	126.667	1140	89831	9	0	59068	0	4	0	3	0.652123	-1.36965	0.833622	-0.185011	0.213818	0	DAZL.target
ATAD2B	Atad2b	ENSG00000119778.10	2	23971534	24149984	48.3655	0.40166	157.111	4242	178450	27	0	58754	0	5	0	3	1.20181	-0.70717	1.04131	-0.19229	0.240295	0	DAZL.target
ATF1	Atf1	ENSG00000123268.4	12	51157493	51214905	74.1043	0.442594	142	852	57412	6	1	58846	1	0	0	0	0.42197	0.490247	0.362953	1.16525	1.02155	0	DAZL.target
ATF2	Atf2	ENSG00000115966.12	2	175936978	176033110	97.7944	0.429147	123.385	1604	96132	13	0	59031	1	1	1	1	0.0947519	0.217551	0.579963	0.912983	0.94769	0	DAZL.target
ATF7IP2	Atf7ip2	ENSG00000166669.9	16	10420291	10577495	82.0626	0.364759	210.9	2109	157204	10	0	59027	2	6	1	4	-0.10394	-1.76944	-0.0686375	-0.596058	-0.411525	0	DAZL.target
ATG14	Atg14	ENSG00000126775.8	14	55833110	55878576	61.711	0.455528	153.9	1539	45466	10	0	58752	0	4	0	2	0.325426	-1.04956	0.551818	-0.357672	-0.0342491	0	DAZL.target
ATIC	Atic	ENSG00000138363.10	2	216176540	216214487	97.4896	0.454204	126.867	1903	37947	15	0	59051	0	3	0	1	1.01864	0.214868	1.12932	0.340207	0.735639	0	DAZL.target
ATL1	Atl1	ENSG00000198513.7	14	50999227	51099786	68.8441	0.425184	126.357	1769	100559	14	0	58934	1	4	0	0	0.73345	0.819568	0.289127	-0.159186	0.0261447	0	DAZL.target
ATM	Atm	ENSG00000149311.13	11	108093211	108239829	88.9042	0.389676	152.413	9602	146618	63	0	58998	7	17	2	1	1.12994	2.2025	-0.538892	-1.01106	-0.720955	0	DAZL.target
ATP2A2	Atp2a2	ENSG00000174437.12	12	110718561	110788898	114.862	0.473145	156.095	3278	70337	21	0	59049	1	4	0	2	1.48018	-0.04769	0.958119	0.381363	0.675451	0	DAZL.target
ATP2B1	Atp2b1	ENSG00000070961.10	12	89981828	90103077	103.541	0.402104	194.55	3891	121249	20	0	59024	2	1	1	0	0.51236	1.37266	0.401498	1.12964	0.975773	0	DAZL.target
ATP2B4	Atp2b4	ENSG00000058668.10	1	203595689	203713209	98.679	0.502709	187.048	3928	117520	21	0	58965	0	0	0	0	1.2448	1.25403	1.21927	1.42384	1.66777	0	DAZL.target
ATP6V1A	Atp6v1a	ENSG00000114573.5	3	113465866	113530903	91.4062	0.443208	138.429	1938	65037	14	0	59104	1	0	0	0	0.917153	0.922717	0.496278	1.23888	1.15201	0	DAZL.target
AXIN2	Axin2	ENSG00000168646.8	17	63524681	63557765	78.9034	0.574038	267.4	2674	33084	10	1	58881	1	0	0	0	0.510797	0.539387	0.398373	1.23096	1.06932	0	DAZL.target
B2M	B2m	ENSG00000166710.13	15	45003675	45011075	107.123	0.48112	133	399	7400	3	0	58953	0	5	0	1	0.414048	-0.423332	0.804653	-0.418036	-0.00166999	0	DAZL.target
B4GALT5	B4galt5	ENSG00000158470.5	20	48249482	48330415	97.469	0.502168	135.667	1221	80933	9	0	59128	8	2	2	1	-1.03299	-0.10664	-2.04856	0.42813	-0.686383	0	DAZL.target
BAHD1	Bahd1	ENSG00000140320.7	15	40731920	40760441	77.4948	0.600826	396.5	2379	28521	6	0	58960	0	1	0	0	0.107153	0.126936	0.426799	0.399003	0.55688	0	DAZL.target
BANF1	Banf1	ENSG00000175334.3	11	65769550	65771620	72.9348	0.560589	141	282	2070	2	0	58690	0	0	0	0	-0.0689764	-0.00959287	0.326846	0.720484	0.802745	0	DAZL.target
BAZ2A	Baz2a	ENSG00000076108.7	12	56989380	57030600	71.7893	0.537133	209.481	5656	41220	27	0	58670	11	0	11	0	-2.84641	1.18769	-2.57399	1.34166	-0.614967	0	DAZL.target
BAZ2B	Baz2b	ENSG00000123636.13	2	160175490	160473203	82.7689	0.410477	195.588	6650	297713	34	0	59023	3	1	2	0	0.182091	1.98443	0.0946629	1.26332	0.882024	0	DAZL.target
BCAS2	Bcas2	ENSG00000116752.5	1	115110178	115124260	96.2925	0.428457	102.857	720	14082	7	0	59069	2	1	0	0	0.6272	0.592587	-0.0954029	0.743894	0.502713	0	DAZL.target
BCL10	Bcl10	ENSG00000142867.8	1	85731931	85742773	88.9526	0.474626	240	720	10842	3	0	59097	0	0	0	0	0.152932	0.159829	0.544101	0.842823	0.98692	0	DAZL.target
BCL6B	Bcl6b	ENSG00000161940.6	17	6926339	6933609	104.122	0.606554	186	1488	7270	8	0	59068	0	0	0	0	0.65631	0.585921	0.915021	1.16705	1.35531	0	DAZL.target
BCL7A	Bcl7a	ENSG00000110987.4	12	122457328	122499948	84.2197	0.540866	122	732	42620	6	0	59136	0	0	0	0	0.317019	0.361643	0.601532	0.930754	1.06738	0	DAZL.target
BCR	Bcr	ENSG00000186716.15	22	23521891	23660224	73.1677	0.578065	171.64	4291	138333	25	3	58668	26	82	20	64	-2.84641	-2.87279	-2.62354	-2.53125	-2.47163	1	DAZL.target
BECN1	Becn1	ENSG00000126581.8	17	40962152	40985367	80.2992	0.500045	130.5	1566	23215	12	0	59169	0	9	0	0	0.595634	0.635097	0.775383	-1.14145	-0.632252	0	DAZL.target
BHLHE41	Bhlhe41	ENSG00000123095.5	12	26272959	26278060	88.0013	0.459438	307.2	1536	5101	5	0	59070	1	0	0	0	0.223374	0.212595	0.0530041	0.868032	0.706571	0	DAZL.target
BICC1	Bicc1	ENSG00000122870.7	10	60272900	60591195	78.5536	0.464509	150.429	3159	318295	21	0	59010	0	4	0	3	1.22945	-0.686914	1.07514	0.0421958	0.459015	0	DAZL.target
BIRC6	Birc6	ENSG00000115760.9	2	32582096	32843966	69.6054	0.433058	199.946	14796	261870	74	0	59008	0	107	0	2	2.8891	1.88011	1.93965	-2.53125	-2.47163	0	DAZL.target
BLCAP	Blcap	ENSG00000166619.8	20	36120874	36156333	128.977	0.604279	174	348	35459	2	0	58775	6	0	0	0	0.660968	0.528729	-1.33061	1.26322	0.0546494	0	DAZL.target
BLM	Blm	ENSG00000197299.6	15	91260558	91358859	85.7574	0.398065	208.571	4380	98301	21	1	59329	3	1	3	0	-0.997689	1.38139	0.138304	1.28975	0.910035	0	DAZL.target
BLOC1S6	Bloc1s6	ENSG00000104164.6	15	45879321	45908197	59.0711	0.45256	111.8	559	28876	5	0	58950	1	2	0	0	0.0454624	0.144263	-0.155611	0.0479335	0.0168272	0	DAZL.target
BMPR1A	Bmpr1a	ENSG00000107779.7	10	88516407	88692595	98.3798	0.435731	151.364	1665	176188	11	0	58924	1	9	0	0	0.913302	0.938658	0.493451	-1.01207	-0.563783	0	DAZL.target
BNC1	Bnc1	ENSG00000169594.8	15	83924655	83953466	104.602	0.501223	727.5	2910	28811	4	2	59033	0	1	0	0	0.431892	0.37859	1.3094	1.13312	1.37148	0	DAZL.target
BNIP3	Bnip3	ENSG00000176171.7	10	133781578	133795435	91.8023	0.476633	114.4	572	13857	5	0	58950	2	5	0	2	0.366864	-1.09408	-0.303539	-0.491146	-0.438469	0	DAZL.target
BRD1	Brd1	ENSG00000100425.14	22	50166931	50221160	80.5838	0.600874	303.333	3640	54229	12	0	58937	0	5	0	3	0.50158	-1.54692	0.673373	-0.475338	-0.109805	0	DAZL.target
BRD4	Brd4	ENSG00000141867.13	19	15347647	15443356	75.1661	0.585434	212.05	4241	95709	20	0	58918	0	0	0	0	0.908637	0.96923	0.894956	1.20148	1.36885	0	DAZL.target
BRD7	Brd7	ENSG00000166164.11	16	50347398	50402845	105.015	0.472519	122.619	2575	55447	21	0	58653	7	43	7	42	-2.84641	-2.87279	-1.29059	-2.53125	-2.47163	0	DAZL.target
BRDT	Brdt	ENSG00000137948.14	1	92414928	92479983	68.9831	0.378977	164.556	2962	65055	18	0	59081	1	12	1	0	0.0899168	1.02435	0.488311	-1.43997	-0.906103	0	DAZL.target
BRK1	Brk1	ENSG00000254999.2	3	10157276	10168874	35.9963	0.49809	110.333	331	11598	3	1	58855	0	0	0	0	-0.231986	-0.0654891	0.403907	0.842853	0.888218	0	DAZL.target
BRSK2	Brsk2	ENSG00000174672.11	11	1411129	1483919	63.7525	0.57803	113.333	2380	72790	21	0	59000	1	8	1	1	0.020463	0.261264	0.363113	-0.838228	-0.504044	0	DAZL.target
BRWD1	Brwd1	ENSG00000185658.9	21	40556102	40693485	74.2381	0.406885	184.425	7377	137383	40	0	58887	0	2	0	0	1.92273	2.0228	1.53762	1.01592	1.4025	0	DAZL.target
BTAF1	Btaf1	ENSG00000095564.9	10	93683526	93790082	79.5187	0.418185	152.132	5781	106556	38	0	59098	5	28	5	20	-1.66913	-2.87279	-0.531461	-2.46607	-1.81224	0	DAZL.target
BTBD10	Btbd10	ENSG00000148925.6	11	13409548	13484844	121.657	0.424476	188.25	1506	75296	8	0	59093	0	3	0	0	0.973574	0.863237	1.24481	0.375327	0.807781	0	DAZL.target
BTBD3	Btbd3	ENSG00000132640.10	20	11871371	11907257	106.2	0.457726	398.25	1593	35886	4	0	58914	1	6	1	4	-0.545748	-2.28129	0.220837	-0.710915	-0.424823	0	DAZL.target
BTBD7	Btbd7	ENSG00000011114.10	14	93703896	93799438	99.7443	0.455234	349	3490	95542	10	0	59065	0	3	0	0	0.629791	0.598975	0.858292	0.0948521	0.451785	0	DAZL.target
BUB3	Bub3	ENSG00000154473.13	10	124913793	124924886	94.5904	0.468172	132	1056	11093	8	0	59027	1	1	0	0	0.567913	0.549869	0.302448	0.715496	0.693266	0	DAZL.target
BZW1	Bzw1	ENSG00000082153.13	2	201675317	201688569	46.104	0.407566	118.545	1304	13252	11	0	58870	1	0	1	0	-0.576814	0.429797	0.0271573	0.889557	0.7054	0	DAZL.target
C10orf88	2310057M21Rik	ENSG00000119965.8	10	124690419	124713919	63.6678	0.445897	229	1374	23500	6	0	58873	1	1	0	0	0.0821012	0.15067	-0.122508	0.378954	0.277375	0	DAZL.target
C11orf58	1110004F10Rik	ENSG00000110696.5	11	16634679	16778428	80.7654	0.448676	116.4	582	143749	5	0	59063	0	0	0	0	0.35616	0.444082	0.606137	0.891669	1.04971	0	DAZL.target
C12orf45	D10Wsu102e	ENSG00000151131.5	12	105380088	105443515	41.4208	0.487339	145.5	582	63427	4	0	58803	23	25	0	0	-0.241206	-0.0700024	-2.62354	-2.53125	-2.47163	0	DAZL.target
C12orf66	BC048403	ENSG00000174206.8	12	64580096	64616076	58.9354	0.539729	452	1356	35980	3	0	58989	0	2	0	0	-0.299351	-0.18658	0.121025	-0.171756	-0.0196432	0	DAZL.target
C14orf28	Gm527	ENSG00000179476.3	14	45366498	45376460	112.35	0.391017	239.75	959	9962	4	0	59023	4	2	1	1	-0.245209	-0.241473	-0.736466	0.46287	-0.00286493	0	DAZL.target
C16orf72	1810013L24Rik	ENSG00000182831.7	16	9185505	9215497	64.795	0.543747	213	852	29992	4	0	59054	0	14	0	6	-0.073899	-2.87279	0.288358	-2.22274	-1.70136	0	DAZL.target
C19orf44	1700030K09Rik	ENSG00000105072.4	19	16607122	16632163	79.3993	0.570008	254.4	2544	25041	10	0	58876	0	4	0	0	0.377467	0.39762	0.611014	-0.296987	0.0259697	0	DAZL.target
C1D	C1d	ENSG00000197223.7	2	68268262	68338080	42.6515	0.3769	114.25	457	69818	4	0	58741	0	2	0	0	0.0292856	0.144262	0.365105	-0.00625575	0.213383	0	DAZL.target
C1orf122	1110065P20Rik	ENSG00000197982.12	1	38272651	38275126	92.0621	0.5678	164	492	2475	3	0	59141	0	0	0	0	0.2023	0.197808	0.573536	0.898658	1.03073	0	DAZL.target
C2orf49	AI597479	ENSG00000135974.5	2	105953816	105965668	61.6441	0.473057	209	836	11852	4	0	58944	0	1	0	0	-0.0810606	0.00497384	0.300723	0.304942	0.450332	0	DAZL.target
CAB39	Cab39	ENSG00000135932.6	2	231577560	231685790	63.8317	0.389575	143.143	1002	108230	7	0	59096	0	1	0	0	0.385586	0.467854	0.608848	0.499522	0.723359	0	DAZL.target
CAB39L	Cab39l	ENSG00000102547.14	13	49882786	50018262	94.8062	0.393673	132.75	1062	135476	8	0	59153	24	10	7	5	-2.84641	-2.25704	-2.62354	-1.22585	-2.47163	0	DAZL.target
CABLES2	Cables2	ENSG00000149679.7	20	60963688	60982341	112.115	0.580773	125.444	1129	18653	9	0	58686	4	14	4	6	-2.19036	-2.76747	-0.70287	-1.62665	-1.33257	0	DAZL.target
CACUL1	Cacul1	ENSG00000151893.10	10	120433679	120514761	84.3439	0.452121	129.333	1164	81082	9	0	58981	1	0	0	0	0.570684	0.61595	0.239141	1.03591	0.903019	0	DAZL.target
CACYBP	Cacybp	ENSG00000116161.13	1	174968300	174980851	62.1194	0.416106	147	882	12551	6	0	59172	2	2	0	0	0.179257	0.237835	-0.501804	0.113246	-0.10065	0	DAZL.target
CAD	Cad	ENSG00000084774.9	2	27440258	27466811	94.1543	0.574757	164	7052	26553	43	0	58965	0	7	0	2	2.06193	0.629138	1.69698	0.027763	0.586429	0	DAZL.target
CADM1	Cadm1	ENSG00000182985.12	11	115039938	115375675	78.5736	0.520919	118.833	1426	335737	12	0	59033	1	4	0	4	0.782293	-1.64329	0.246153	-0.191198	-0.0237043	0	DAZL.target
CALM1	Calm1	ENSG00000198668.6	14	90862846	90874605	77.1193	0.434732	81	486	11759	6	0	58875	0	2	0	0	0.347492	0.379465	0.639721	0.232492	0.502935	0	DAZL.target
CALM2	Calm2	ENSG00000143933.12	2	47387221	47403740	67.7297	0.439967	92	552	16519	6	0	59057	1	4	0	0	0.227592	0.291301	-0.00595822	-0.383871	-0.251292	0	DAZL.target
CALM3	Calm3	ENSG00000160014.12	19	47104331	47114050	61.1501	0.526821	95.4	477	9719	5	0	59106	0	0	0	0	0.00104096	0.0998263	0.340511	0.747292	0.828006	0	DAZL.target
CALR	Calr	ENSG00000179218.9	19	13049392	13055303	80.8922	0.552576	126.778	1141	5911	9	0	58877	1	4	1	2	-0.483727	-1.00429	0.132485	-0.245116	-0.106495	0	DAZL.target
CAMK2G	Camk2g	ENSG00000148660.16	10	75572259	75634343	89.9123	0.527589	101.1	2022	62084	20	0	58951	2	3	1	2	0.252753	-0.25656	0.155711	0.400073	0.365014	0	DAZL.target
CAMKK2	Camkk2	ENSG00000110931.14	12	121675497	121736111	70.2934	0.547665	122.556	2206	60614	18	0	59152	3	9	1	0	-0.0927201	0.906108	-0.548425	-1.05075	-0.918537	0	DAZL.target
CAMSAP2	Camsap2	ENSG00000118200.10	1	200708686	200829832	81.3682	0.418332	254.889	4588	121146	18	0	58943	0	18	0	6	0.963707	-2.52436	0.987353	-2.14641	-1.40714	0	DAZL.target
CAND1	Cand1	ENSG00000111530.8	12	67663061	67713731	84.5061	0.395278	260.214	3643	50670	14	0	59156	0	3	0	2	0.823545	-0.666447	0.955401	0.169221	0.551263	0	DAZL.target
CAPRIN1	Caprin1	ENSG00000135387.15	11	34073230	34122703	68.4039	0.472406	125.444	2258	49473	18	0	58996	1	6	0	2	0.818468	-0.558333	0.337089	-0.521108	-0.246253	0	DAZL.target
CASC3	Casc3	ENSG00000108349.10	17	38296571	38328436	93.0801	0.500823	161.5	2261	31865	14	0	58964	0	2	0	1	0.819211	0.0300882	0.964362	0.514732	0.827318	0	DAZL.target
CASC4	Casc4	ENSG00000166734.14	15	44580927	44707956	71.0596	0.430023	143.1	1431	127029	10	0	58924	0	1	0	0	0.534177	0.626744	0.694909	0.59236	0.821256	0	DAZL.target
CASP7	Casp7	ENSG00000165806.15	10	115438942	115490662	112.314	0.484368	162.833	977	51720	6	0	59075	0	2	0	1	0.653131	-0.184634	0.96793	0.47934	0.804579	0	DAZL.target
CASP9	Casp9	ENSG00000132906.13	1	15817327	15853029	71.1676	0.529334	131.636	1448	35702	11	0	59100	2	3	0	0	0.435445	0.51114	-0.365009	-0.0113839	-0.136349	0	DAZL.target
CBFB	Cbfb	ENSG00000067955.9	16	67063019	67134961	81.2798	0.524725	104.833	629	71942	6	0	59033	0	2	0	1	0.311848	-0.399874	0.580136	0.213224	0.455203	0	DAZL.target
CBL	Cbl	ENSG00000110395.4	11	119076752	119178859	100.942	0.499376	176.062	2817	102107	16	0	58870	1	2	1	0	0.126997	1.0363	0.57969	0.624787	0.723269	0	DAZL.target
CBLB	Cblb	ENSG00000114423.14	3	105374305	105588396	89.55	0.449606	171.611	3089	214091	18	0	59127	3	2	2	1	-0.555453	0.422072	-0.300291	0.594627	0.290105	0	DAZL.target
CBX2	Cbx2	ENSG00000173894.6	17	77751931	77761782	45.6373	0.635959	395.4	1977	9851	5	0	58633	0	1	0	1	-0.221121	-0.924271	0.148415	0.201837	0.287542	0	DAZL.target
CBX8	Cbx8	ENSG00000141570.6	17	77765931	77775482	118.553	0.570607	240	1200	9551	5	0	59014	0	1	0	0	0.598493	0.492518	0.966718	0.811178	1.07238	0	DAZL.target
CCAR1	Ccar1	ENSG00000060339.9	10	70480769	70552134	78.2767	0.419253	142.16	3554	71365	25	0	58974	0	1	0	1	1.34432	0.600694	1.24375	1.05439	1.36838	0	DAZL.target
CCDC117	Ccdc117	ENSG00000159873.5	22	29168662	29185283	74.4665	0.423201	169.75	679	16621	4	0	59024	1	4	0	4	0.173043	-2.38312	-0.0136237	-0.420284	-0.277923	0	DAZL.target
CCDC138	Ccdc138	ENSG00000163006.7	2	109403213	109501933	74.7614	0.36888	133.562	2137	98720	16	4	59001	4	10	0	1	1.64123	0.838576	0.948178	0.495235	0.655105	1	DAZL.target
CCDC43	Ccdc43	ENSG00000180329.9	17	42750437	42767147	71.5508	0.476765	147.167	883	16710	6	3	58750	1	0	0	0	0.616093	0.656868	1.13126	1.98661	1.80694	0	DAZL.target
CCDC6	Ccdc6	ENSG00000108091.10	10	61548521	61666414	75.8216	0.483934	174.2	1742	117893	10	0	59131	0	2	0	2	0.46704	-0.900689	0.64756	0.254702	0.513854	0	DAZL.target
CCDC73	Ccdc73	ENSG00000186714.8	11	32623792	32816204	71.8787	0.333938	207.882	3534	192412	17	0	58923	10	13	10	9	-2.84641	-2.87279	-2.25684	-1.54888	-1.70305	0	DAZL.target
CCND1	Ccnd1	ENSG00000110092.3	11	69455855	69469242	60.0306	0.632409	236.4	1182	13387	5	0	58853	0	13	0	11	0.0141639	-2.87279	0.331381	-2.06607	-1.56758	0	DAZL.target
CCNK	Ccnk	ENSG00000090061.13	14	99947506	100001381	70.1071	0.447146	134.111	1207	53875	9	0	58887	0	2	0	0	0.399259	0.471492	0.624886	0.229756	0.490227	0	DAZL.target
CCNY	Ccny	ENSG00000108100.13	10	35535953	35860852	79.4955	0.472199	109	1090	324899	10	0	58995	2	1	2	0	-0.97562	0.873844	-0.23227	0.640786	0.363425	0	DAZL.target
CCP110	Ccp110	ENSG00000103540.12	16	19535133	19564730	85.4319	0.395444	235.462	3061	29597	13	0	58944	1	3	0	0	0.795393	0.754048	0.418361	0.162832	0.329915	0	DAZL.target
CCPG1	Ccpg1	ENSG00000260916.1	15	55632230	55700708	75.7737	0.404751	287.778	2590	68478	9	0	59059	0	6	0	0	0.442896	0.459955	0.675743	-0.755536	-0.316918	0	DAZL.target
CCT2	Cct2	ENSG00000166226.8	12	69979114	69995350	77.9516	0.434449	114.312	1829	16236	16	0	58907	0	3	0	2	0.883009	-0.554046	0.974756	0.225016	0.591088	0	DAZL.target
CCT3	Cct3	ENSG00000163468.10	1	156278759	156337664	91.1771	0.500325	123	1722	58905	14	0	59175	0	2	0	0	0.854841	0.879334	0.97262	0.523951	0.836653	0	DAZL.target
CCT4	Cct4	ENSG00000115484.10	2	62095224	62115939	78.554	0.434171	121.714	1704	20715	14	0	58845	0	8	0	1	0.780614	0.0190021	0.911102	-0.900815	-0.378734	0	DAZL.target
CCT7	Cct7	ENSG00000135624.11	2	73460548	73480149	82.6588	0.491024	140.75	1689	19601	12	0	58818	0	3	0	0	0.616987	0.643312	0.80131	0.100789	0.428894	0	DAZL.target
CCT8	Cct8	ENSG00000156261.8	21	30428126	30446118	78.5941	0.424907	116	1740	17992	15	0	58996	0	3	0	0	0.858601	0.877004	0.966003	0.210521	0.579047	0	DAZL.target
CD9	Cd9	ENSG00000010278.7	12	6308881	6347425	55.6086	0.503234	130.75	1046	38544	8	0	59115	0	14	0	2	0.114355	-1.22152	0.392692	-2.12243	-1.58563	0	DAZL.target
CDC20	Cdc20	ENSG00000117399.9	1	43824626	43828874	126.512	0.567842	159.556	1436	4248	9	0	59043	1	11	0	2	0.964081	-0.635966	0.721761	-1.09044	-0.569788	0	DAZL.target
CDC42BPA	Cdc42bpa	ENSG00000143776.14	1	227177566	227506175	78.7852	0.418963	148.462	5790	328609	39	0	59089	11	4	9	3	-2.84641	0.170699	-1.98945	0.484986	-0.538393	0	DAZL.target
CDC42BPB	Cdc42bpb	ENSG00000198752.5	14	103398716	103523799	84.1983	0.524288	145.514	5093	125083	35	0	58937	0	3	0	2	1.71749	0.349238	1.43176	0.660013	1.06121	0	DAZL.target
CDC42EP4	Cdc42ep4	ENSG00000179604.8	17	71279763	71308314	62.9705	0.656772	1077	1077	28551	1	0	58868	0	0	0	0	-0.349939	-0.263004	0.075097	0.398524	0.432151	0	DAZL.target
CDC7	Cdc7	ENSG00000097046.8	1	91966408	91991321	89.7922	0.412969	162.818	1791	24913	11	0	59046	2	3	2	0	-0.933777	0.732418	-0.043227	0.171621	0.13985	0	DAZL.target
CDC73	Cdc73	ENSG00000134371.9	1	193091147	193223031	85.0354	0.438596	99.8824	1698	131884	17	0	59079	2	6	0	6	1.09294	-2.34692	0.0991778	-0.385571	-0.204512	0	DAZL.target
CDCA4	Cdca4	ENSG00000170779.10	14	105475910	105487485	62.9009	0.612551	732	732	11575	1	0	59111	0	3	0	0	-0.364349	-0.268056	0.0859054	-0.524788	-0.33935	0	DAZL.target
CDCA7	Cdca7	ENSG00000144354.9	2	174219548	174233725	99.6186	0.47177	154	1386	14177	9	0	59111	1	1	1	1	-0.247263	-0.15753	0.383426	0.776971	0.769037	0	DAZL.target
CDCA8	Cdca8	ENSG00000134690.6	1	38158090	38175391	86.3018	0.503655	90.3	903	17301	10	0	59109	1	0	0	0	0.589195	0.616141	0.266742	1.08965	0.947953	0	DAZL.target
CDK17	Cdk17	ENSG00000059758.3	12	96672039	96794338	78.2508	0.400937	112.533	1688	122299	15	0	58984	0	1	0	1	0.981333	0.254145	1.01924	0.835296	1.1283	0	DAZL.target
CDK2	Cdk2	ENSG00000123374.6	12	56360553	56366568	99.9426	0.503104	134.143	939	6015	7	0	58950	2	0	0	0	0.537058	0.506435	-0.162434	1.09757	0.693365	0	DAZL.target
CDK8	Cdk8	ENSG00000132964.7	13	26828276	26979375	97.1549	0.425658	113.308	1473	151099	13	0	59167	0	6	0	3	1.04965	-0.979796	1.12391	-0.388815	0.123675	0	DAZL.target
CDKN1B	Cdkn1b	ENSG00000111276.6	12	12867992	12875305	80.7531	0.464934	251.667	755	7313	3	0	58699	0	0	0	0	0.0637954	0.0915923	0.457795	0.775618	0.904085	0	DAZL.target
CDON	Cdon	ENSG00000064309.10	11	125825691	125933230	81.7344	0.47053	217.368	4130	107539	19	0	58958	4	2	2	0	-0.752753	0.991702	-0.805	0.519242	0.000150253	0	DAZL.target
CDS2	Cds2	ENSG00000101290.9	20	5107432	5178533	130.539	0.474656	114.583	1375	71101	12	0	59117	1	7	1	2	0.369888	-0.296896	0.950204	-0.284822	0.154861	0	DAZL.target
CDT1	Cdt1	ENSG00000167513.4	16	88869621	88875666	43.1944	0.671555	170.1	1701	6045	10	0	58860	5	15	1	0	-0.663097	0.315709	-1.6436	-2.1812	-2.07756	0	DAZL.target
CECR2	Cecr2	ENSG00000099954.14	22	17840837	18037850	67.8944	0.503741	235.737	4479	197013	19	0	58825	0	15	0	14	0.797582	-2.87279	0.778533	-1.94488	-1.31924	0	DAZL.target
CELF1	Celf1	ENSG00000149187.13	11	47487496	47587121	102.73	0.49957	128.667	1544	99625	12	0	59131	0	2	0	0	0.905768	0.909338	1.04999	0.567347	0.898795	0	DAZL.target
CELF2	Celf2	ENSG00000048740.13	10	11047259	11378674	92.4914	0.509256	131.214	1837	331415	14	0	58905	0	2	0	2	1.03588	-0.313695	1.00197	0.511854	0.835769	0	DAZL.target
CENPA	Cenpa	ENSG00000115163.10	2	26987157	27023935	80.4743	0.541078	106	424	36778	4	0	58929	0	2	0	0	0.163472	0.219825	0.492362	0.146942	0.37129	0	DAZL.target
CENPF	Cenpf	ENSG00000117724.8	1	214776538	214837931	78.5371	0.422754	497.842	9459	61393	19	0	59147	2	10	2	9	-0.885655	-2.87279	-0.161408	-1.22087	-0.917279	0	DAZL.target
CEP170	Cep170	ENSG00000143702.11	1	243287730	243418650	36.0435	0.424658	319.4	4791	130920	15	0	58746	0	12	0	8	0.277072	-2.87279	0.437262	-1.85507	-1.34813	0	DAZL.target
CEP55	Cep55	ENSG00000138180.11	10	95256389	95288849	84.7504	0.389017	166	1494	32460	9	0	58890	0	0	0	0	0.666699	0.642922	0.88263	1.08056	1.30361	0	DAZL.target
CEP85	Cep85	ENSG00000130695.9	1	26560691	26605299	87.8207	0.519364	182.077	2367	44608	13	0	58985	4	1	0	0	0.684752	0.701218	-0.923413	0.749722	0.0609616	0	DAZL.target
CERS2	Cers2	ENSG00000143418.15	1	150933059	150947479	92.6168	0.520335	178.533	2678	14420	15	0	59047	0	4	0	0	0.827322	0.810813	0.965456	-0.0137581	0.377163	0	DAZL.target
CERS6	Cers6	ENSG00000172292.10	2	169312372	169631644	94.909	0.460818	112.909	1242	319272	11	0	59152	1	2	0	0	0.963372	1.05998	0.456881	0.48091	0.574526	0	DAZL.target
CFDP1	Cfdp1	ENSG00000153774.4	16	75327596	75467383	104.545	0.466986	134.857	944	139787	7	0	59178	5	9	0	0	0.706927	0.716788	-1.158	-1.07068	-1.10004	0	DAZL.target
CFL2	Cfl2	ENSG00000165410.10	14	35179593	35184029	52.3393	0.340686	751.75	3007	4436	4	0	58833	1	1	1	0	-1.00377	-0.0902628	-0.217349	0.174451	0.0900611	0	DAZL.target
CHAMP1	Champ1	ENSG00000198824.4	13	115079988	115092796	144.846	0.464432	2445	2445	12808	1	0	58832	2	6	0	0	0.271412	0.117906	-0.167122	-0.885436	-0.728855	0	DAZL.target
CHD6	Chd6	ENSG00000124177.10	20	40030741	40247133	104.318	0.483504	228.919	8470	216392	37	0	58878	22	2	5	1	-1.52942	1.3169	-2.62354	1.14791	-1.14868	0	DAZL.target
CHERP	Cherp	ENSG00000085872.10	19	16628700	16653341	77.5184	0.625158	152.75	2444	24641	16	0	59005	0	1	0	0	0.831906	0.846832	0.893898	0.813477	1.03957	0	DAZL.target
CHML	Chml	ENSG00000203668.1	1	241792155	241799232	124.933	0.397877	1977	1977	7077	1	0	59295	1	7	0	0	0.207624	0.0939524	0.188675	-1.15272	-0.801881	0	DAZL.target
CHMP1A	Chmp1a	ENSG00000131165.10	16	89710839	89724253	57.923	0.604696	138.857	972	13414	7	0	58961	2	19	0	3	0.112801	-1.85881	-0.606039	-2.53125	-2.20362	0	DAZL.target
CHMP1B	Chmp1b	ENSG00000255112.2	18	11851395	11854448	80.8795	0.543046	603	603	3053	1	2	58772	0	1	0	0	0.0903277	0.143572	0.997625	0.913923	1.08176	0	DAZL.target
CHMP4B	Chmp4b	ENSG00000101421.3	20	32399110	32442172	85.9597	0.518956	141	705	43062	5	0	59013	7	2	0	0	0.267764	0.30732	-2.08965	0.205502	-0.834325	0	DAZL.target
CHN1	Chn1	ENSG00000128656.9	2	175664091	175870097	50.0208	0.447822	173.214	2425	206006	14	0	58962	0	0	0	0	0.503369	0.681433	0.583825	0.90967	1.04089	0	DAZL.target
CHORDC1	Chordc1	ENSG00000110172.7	11	89934328	89956532	62.1303	0.415801	124.182	1366	22204	11	0	58978	3	7	1	0	-0.429765	0.542593	-0.725161	-0.904954	-0.876298	0	DAZL.target
CHP1	Chp1	ENSG00000187446.7	15	41523037	41574043	71.0636	0.491326	90	630	51006	7	0	59039	0	0	0	0	0.271703	0.361381	0.534864	0.880378	1.00736	0	DAZL.target
CHSY1	Chsy1	ENSG00000131873.5	15	101715928	101792137	95.9581	0.508503	1050.5	2101	76209	2	1	57912	0	11	0	1	0.0385936	-0.719019	0.680108	-1.66519	-1.13349	1	DAZL.target
CHTOP	Chtop	ENSG00000160679.8	1	153606525	153618782	89.9387	0.551131	174.6	873	12257	5	0	58900	0	11	0	0	0.278448	0.284264	0.60921	-1.59449	-1.06705	0	DAZL.target
CHUK	Chuk	ENSG00000213341.6	10	101948055	101989376	85.6951	0.397971	112.65	2253	41321	20	0	59016	0	1	0	0	1.2778	1.27204	1.26289	1.03794	1.37074	0	DAZL.target
CIAO1	Ciao1	ENSG00000144021.2	2	96931870	96939087	79.6431	0.564764	151.714	1062	7217	7	3	59031	5	3	0	0	0.734269	0.745449	-0.341643	1.08839	0.477634	1	DAZL.target
CIAPIN1	Ciapin1	ENSG00000005194.10	16	57462081	57481440	102.127	0.513738	130.125	1041	19359	8	0	59081	1	1	1	0	-0.284197	0.59443	0.3607	0.77296	0.752469	0	DAZL.target
CIB1	Cib1	ENSG00000185043.6	15	90773207	90777279	61.3922	0.538791	93.5	561	4072	6	0	58884	1	6	0	0	0.062069	0.156311	-0.156358	-0.899992	-0.719973	0	DAZL.target
CKAP2	Ckap2	ENSG00000136108.10	13	53029564	53050763	72.3662	0.404552	234.778	2113	21199	9	3	59146	14	12	9	1	-2.84641	0.0702276	-2.29596	-0.568689	-1.13955	1	DAZL.target
CKAP5	Ckap5	ENSG00000175216.10	11	46764598	46867847	100.063	0.443431	149.093	6411	103249	43	0	58936	1	4	1	2	1.34361	0.828119	1.32898	0.732118	1.05736	0	DAZL.target
CKS1B	Cks1b	ENSG00000173207.8	1	154947129	154951725	62.265	0.495152	71.75	287	4596	4	0	58949	0	3	0	3	-0.022765	-1.98868	0.339052	-0.247827	-0.0088041	0	DAZL.target
CLASP1	Clasp1	ENSG00000074054.13	2	122095352	122407163	59.1475	0.470973	116.116	4993	311811	43	0	59004	0	2	0	1	1.93227	1.39798	1.44111	0.945971	1.2918	0	DAZL.target
CLIC4	Clic4	ENSG00000169504.10	1	25071848	25170815	81.8768	0.451351	133	798	98967	6	0	59143	0	0	0	0	0.383235	0.446992	0.640619	0.924158	1.08687	0	DAZL.target
CLIC6	Clic6	ENSG00000159212.8	21	36041688	36090525	76.1099	0.442357	143.4	717	48837	5	0	59290	0	1	0	0	0.24101	0.294816	0.549936	0.481134	0.685188	0	DAZL.target
CLNS1A	Clns1a	ENSG00000074201.4	11	77225981	77348850	59.481	0.469231	125	750	122869	6	0	58993	2	6	0	0	0.129282	0.276179	-0.603124	-0.923002	-0.876701	0	DAZL.target
CLSTN1	Clstn1	ENSG00000171603.12	1	9789084	9884584	96.3461	0.541808	169.167	3045	95500	18	0	59038	1	2	0	0	1.07531	1.08762	0.571402	0.639492	0.725392	0	DAZL.target
CLTC	Cltc	ENSG00000141367.7	17	57697219	57773671	90.2786	0.422712	163.906	5245	76452	32	1	59043	0	2	0	0	1.88487	1.90093	1.86096	1.26794	1.69909	0	DAZL.target
CMAS	Cmas	ENSG00000111726.8	12	22199108	22218608	78.1213	0.427781	169.125	1353	19500	8	0	58992	0	5	0	0	0.424871	0.441568	0.687824	-0.511523	-0.111042	0	DAZL.target
CMIP	Cmip	ENSG00000153815.12	16	81478775	81745367	69.6023	0.560792	120.429	2529	266592	21	0	58965	1	2	0	1	1.09479	0.482485	0.42073	0.530528	0.576356	0	DAZL.target
CMPK1	Cmpk1	ENSG00000162368.9	1	47799469	47844511	60.3753	0.432347	120.5	723	45042	6	0	59070	0	4	0	3	0.159787	-1.802	0.457713	-0.443036	-0.12954	0	DAZL.target
CNEP1R1	Cnep1r1	ENSG00000205423.7	16	50058321	50070999	41.4112	0.434287	70.3333	422	12678	6	0	58753	0	0	0	0	-0.0224917	0.107073	0.321262	0.718484	0.800021	0	DAZL.target
CNN3	Cnn3	ENSG00000117519.11	1	95362507	95392834	79.1239	0.45907	147.429	1032	30327	7	0	59238	0	1	0	0	0.34504	0.383415	0.625283	0.552001	0.76496	0	DAZL.target
CNOT1	Cnot1	ENSG00000125107.12	16	58553855	58663790	95.5347	0.450158	151.83	7136	109935	47	0	58794	12	44	12	44	-2.84641	-2.87279	-1.93059	-2.53125	-2.45495	0	DAZL.target
CNOT11	Cnot11	ENSG00000158435.3	2	101869264	101886778	76.1007	0.477245	225.571	1579	17514	7	0	59119	0	3	0	0	0.222081	0.259696	0.529807	-0.128619	0.156811	0	DAZL.target
CNTD1	Cntd1	ENSG00000176563.5	17	40950810	40963605	99.3374	0.486861	154.5	1236	12795	8	0	59071	2	6	1	0	-0.323413	0.554131	-0.132104	-0.565075	-0.425463	0	DAZL.target
COA5	Coa5	ENSG00000183513.4	2	99215773	99224978	48.6965	0.481759	81	243	9205	3	0	58869	1	0	0	0	-0.217731	-0.0906713	-0.346368	0.624998	0.361761	0	DAZL.target
COG2	Cog2	ENSG00000135775.9	1	230778235	230829728	82.6409	0.448837	129.167	2325	51493	18	0	59106	2	3	2	1	-0.684192	0.260073	0.0559056	0.293113	0.25847	0	DAZL.target
COPA	Copa	ENSG00000122218.10	1	160259063	160313190	110.208	0.494184	117.382	3991	54127	34	0	58982	2	1	2	0	0.307097	1.98078	0.79059	1.5203	1.38647	0	DAZL.target
COPB1	Copb1	ENSG00000129083.8	11	14464986	14521573	89.6097	0.399548	142.333	2989	56587	21	0	59140	1	4	1	0	0.426586	1.31551	0.770788	0.207839	0.486174	0	DAZL.target
COPS7B	Cops7b	ENSG00000144524.13	2	232646381	232673963	53.7028	0.497008	128.857	902	27582	7	0	58945	0	0	0	0	0.0377129	0.158933	0.346426	0.748502	0.830244	0	DAZL.target
COPS8	Cops8	ENSG00000198612.6	2	237993955	238009109	70.0173	0.448455	84.75	678	15154	8	0	59023	1	3	0	0	0.359754	0.420809	0.0812271	-0.0534245	0.0319318	0	DAZL.target
COQ10B	Coq10b	ENSG00000115520.4	2	198318147	198340032	57.2743	0.449741	128.333	770	21885	6	0	58989	0	1	0	0	0.0744464	0.170604	0.396506	0.38659	0.549369	0	DAZL.target
COX11	Cox11	ENSG00000166260.6	17	53029263	53046146	65.1212	0.446905	192.6	963	16883	5	0	59029	1	1	1	0	-0.847051	0.130069	-0.125051	0.378416	0.276983	0	DAZL.target
COX14	Cox14	ENSG00000178449.4	12	50505762	50514240	81.0821	0.530387	180	180	8478	1	1	58608	0	0	0	0	0.0845016	0.135171	0.700703	1.02786	1.15289	0	DAZL.target
COX15	Cox15	ENSG00000014919.8	10	101471601	101491857	93.8168	0.519114	143	1287	20256	9	0	59017	1	0	0	0	0.568455	0.56432	0.279066	1.09146	0.952975	0	DAZL.target
COX7A2L	Cox7a2l	ENSG00000115944.10	2	42560686	42652228	59.1412	0.522027	147.333	442	91542	3	0	59032	0	4	0	0	-0.120534	0.0254017	0.229982	-0.596573	-0.34222	0	DAZL.target
CPEB3	Cpeb3	ENSG00000107864.10	10	93806449	94050844	76.4713	0.499049	241.778	2176	244395	9	0	58819	0	7	0	0	0.436414	0.564538	0.58047	-0.996256	-0.565377	0	DAZL.target
CPNE1	Cpne1	ENSG00000214078.7	20	34213953	34252878	104.544	0.543407	315.067	4726	38925	15	0	59097	19	4	0	2	0.858628	-0.667732	-2.62354	0.0224675	-1.74881	0	DAZL.target
CPSF3	Cpsf3	ENSG00000119203.9	2	9563697	9613230	75.961	0.423447	120.167	2163	49533	18	0	58959	0	2	0	0	0.997115	1.03874	1.03132	0.551574	0.884261	0	DAZL.target
CPSF6	Cpsf6	ENSG00000111605.12	12	69633317	69668138	69.6208	0.456073	173	1730	34821	10	0	59043	0	3	0	0	0.387154	0.446734	0.615305	-0.0557337	0.243949	0	DAZL.target
CRABP1	Crabp1	ENSG00000166426.7	15	78632666	78640572	51.7307	0.571391	137.75	551	7906	4	2	59054	0	1	0	1	0.125571	-0.544519	0.942997	0.971239	1.10232	0	DAZL.target
CREB1	Creb1	ENSG00000118260.10	2	208394461	208468155	75.2486	0.449088	146.5	1172	73694	8	0	59109	0	0	0	0	0.398989	0.465943	0.633849	0.928309	1.08611	0	DAZL.target
CRELD2	Creld2	ENSG00000184164.10	22	50311815	50321188	58.4615	0.599557	132.9	1329	9373	10	0	58898	2	2	0	0	0.27893	0.360729	-0.500383	0.185704	-0.0701367	0	DAZL.target
CRIM1	Crim1	ENSG00000150938.5	2	36583069	36778278	93.1418	0.520657	179.278	3227	195209	18	0	59013	2	3	2	1	-0.60807	0.366774	0.0713743	0.310543	0.269556	0	DAZL.target
CRIP2	Crip2	ENSG00000182809.6	14	105939299	105946499	41.4987	0.646003	79.1667	475	7200	6	0	58757	0	2	0	0	0.0108327	0.118127	0.306188	0.0430763	0.196378	0	DAZL.target
CRK	Crk	ENSG00000167193.7	17	1323983	1366456	80.2042	0.578483	311	933	42473	3	0	58934	0	0	0	0	0.026049	0.0756093	0.391347	0.742047	0.839209	0	DAZL.target
CRKL	Crkl	ENSG00000099942.8	22	21271714	21308037	136.063	0.530324	310	930	36323	3	7	59026	19	47	0	0	1.56231	1.29258	-0.928255	-1.20831	-0.791506	1	DAZL.target
CRLF3	Crlf3	ENSG00000176390.10	17	29096406	29151794	89.7501	0.478213	172.125	1377	55388	8	3	59122	10	28	2	11	-0.758753	-2.87279	-1.45653	-2.01103	-1.70069	1	DAZL.target
CRNKL1	Crnkl1	ENSG00000101343.10	20	20015012	20036690	88.2221	0.439884	183.143	2564	21678	14	0	59180	0	2	0	0	0.814073	0.795381	0.962315	0.490897	0.81656	0	DAZL.target
CRY1	Cry1	ENSG00000008405.7	12	107385142	107487607	96.8597	0.450834	152.75	1833	102465	12	0	59078	2	0	2	0	-0.823692	0.877524	0.0156982	1.21519	0.852942	0	DAZL.target
CRY2	Cry2	ENSG00000121671.7	11	45868669	45904798	74.7555	0.596414	162.083	1945	36129	12	0	58887	0	1	0	0	0.544648	0.588394	0.700338	0.654143	0.851388	0	DAZL.target
CSDE1	Csde1	ENSG00000009307.11	1	115259534	115301297	101.062	0.437977	139.263	2646	41763	19	0	58879	3	3	0	2	1.2776	-0.227457	-0.0935566	0.479557	0.319114	0	DAZL.target
CSE1L	Cse1l	ENSG00000124207.12	20	47662849	47713489	75.9637	0.383387	127.5	3060	50640	24	0	59155	4	105	0	0	1.38307	1.39887	-0.470766	-2.53125	-2.47163	0	DAZL.target
CSK	Csk	ENSG00000103653.12	15	75074398	75095539	59.298	0.574888	158.182	1740	21141	11	3	58744	0	2	0	0	0.737192	0.805819	1.68387	1.34178	1.56333	0	DAZL.target
CSNK1D	Csnk1d	ENSG00000141551.10	17	80196899	80231607	79.9268	0.561375	149.6	1496	34708	10	0	59034	2	9	0	0	0.472246	0.514788	-0.31741	-1.21374	-0.984547	0	DAZL.target
CSNK1G1	Csnk1g1	ENSG00000169118.11	15	64457716	64648442	83.1941	0.455222	119.833	1438	190726	12	0	58962	1	7	0	5	0.793366	-2.18287	0.336673	-0.764496	-0.427579	0	DAZL.target
CSNK2A2	Csnk2a2	ENSG00000070770.4	16	58191811	58231824	83.1659	0.460044	101.727	1119	40013	11	0	58965	0	2	0	1	0.657058	-0.0905344	0.836026	0.400904	0.69845	0	DAZL.target
CST9L	Cst9	ENSG00000101435.4	20	23545369	23549386	108.518	0.509641	154	462	4017	3	0	59012	1	12	0	0	0.39683	0.34058	0.259393	-1.60613	-1.12508	0	DAZL.target
CSTF2T	Cstf2t	ENSG00000177613.7	10	53455247	53459355	108.226	0.540366	1857	1857	4108	1	0	59120	0	2	0	0	-0.176699	-0.185114	0.329675	-0.205309	0.0131356	0	DAZL.target
CSTF3	Cstf3	ENSG00000176102.7	11	33098734	33183917	78.9466	0.405647	120	2520	85183	21	0	59115	0	16	0	0	1.24245	1.28296	1.19218	-1.77129	-1.03162	0	DAZL.target
CTBP2	Ctbp2	ENSG00000175029.12	10	126676421	126849739	68.533	0.574653	303.727	3341	173318	11	0	58877	1	0	0	0	0.359525	0.46904	-0.0307002	0.856615	0.648362	0	DAZL.target
CTDSP2	Ctdsp2	ENSG00000175215.5	12	58213710	58240522	63.6256	0.549795	117	936	26812	8	0	58927	2	3	0	0	0.199706	0.295145	-0.537279	-0.140347	-0.301456	0	DAZL.target
CTDSPL2	Ctdspl2	ENSG00000137770.9	15	44719432	44821236	82.9201	0.393004	122.75	1473	101804	12	0	59070	0	3	0	1	0.875133	0.117431	0.982165	0.183129	0.570524	0	DAZL.target
CTNNBIP1	Ctnnbip1	ENSG00000178585.10	1	9908334	9970394	78.5002	0.622169	88	264	62060	3	0	59078	1	0	0	0	0.193245	0.243978	-0.0441112	0.846283	0.636565	0	DAZL.target
CTNS	Ctns	ENSG00000040531.10	17	3539762	3564836	102.735	0.517905	119.583	1435	25074	12	0	58991	62	6	0	1	0.863016	0.0507271	-2.62354	-0.404363	-2.47163	0	DAZL.target
CTPS1	Ctps	ENSG00000171793.9	1	41445007	41478235	88.4326	0.481077	114.118	1940	33228	17	0	59026	0	1	0	1	0.989723	0.226177	1.05969	0.918966	1.19707	0	DAZL.target
CTTNBP2NL	Cttnbp2nl	ENSG00000143079.10	1	112938803	113006078	100.757	0.466243	486	1944	67275	4	0	59011	0	0	0	0	0.261195	0.241682	0.641505	0.875589	1.04528	0	DAZL.target
CUL2	Cul2	ENSG00000108094.10	10	35297479	35379570	58.1442	0.388561	118.9	2378	82091	20	0	58962	0	24	0	12	1.01615	-2.87279	0.997597	-2.53125	-1.8548	0	DAZL.target
CUL3	Cul3	ENSG00000036257.8	2	225334867	225450110	79.1352	0.407043	150.188	2403	115243	16	0	58812	0	1	0	0	0.976694	1.02062	1.01371	0.835184	1.12563	0	DAZL.target
CUL4A	Cul4a	ENSG00000139842.10	13	113862552	113919399	65.1256	0.456178	115.158	2188	56847	19	0	59196	4	4	3	2	-1.5098	-0.487817	-0.861691	-0.0570941	-0.367655	0	DAZL.target
CWC15	Cwc15	ENSG00000150316.7	11	94695787	94706776	64.462	0.429109	125.5	753	10989	6	0	58992	0	4	0	0	0.188037	0.248915	0.499514	-0.414767	-0.0904036	0	DAZL.target
CWC25	Cwc25	ENSG00000108296.7	17	36956687	36981734	68.3108	0.515846	130.778	1177	25047	9	1	59024	1	9	0	1	0.433638	-0.263966	0.338804	-1.02618	-0.669653	1	DAZL.target
CWF19L2	Cwf19l2	ENSG00000152404.11	11	107197071	107328572	49.8331	0.416967	153.706	2613	131501	17	0	58972	2	19	1	15	-0.220255	-2.87279	-0.257175	-2.41793	-1.882	0	DAZL.target
CXCR4	Cxcr4	ENSG00000121966.6	2	136871919	136875735	86.2945	0.540401	547.5	1095	3816	2	1	58856	0	0	0	0	0.0514122	0.0815396	0.688374	0.970269	1.09714	0	DAZL.target
CXXC1	Cxxc1	ENSG00000154832.10	18	47808713	47814674	97.0366	0.569803	141.071	1975	5961	14	0	59045	0	2	0	2	0.880279	-0.611057	1.02054	0.574327	0.885356	0	DAZL.target
CYB561	Cyb561	ENSG00000008283.11	17	61509665	61523739	64.2714	0.62222	173.4	867	14074	5	0	59123	0	1	0	0	0.0773231	0.137429	0.384175	0.398536	0.536782	0	DAZL.target
DACT1	Dact1	ENSG00000165617.10	14	59100685	59115039	110.404	0.518728	728	2184	14354	3	0	58849	0	0	0	0	0.16564	0.0999698	0.628146	0.852085	1.01076	0	DAZL.target
DAP3	Dap3	ENSG00000132676.11	1	155657751	155708801	82.3771	0.495466	127.643	1787	51050	14	2	59156	5	15	0	0	1.03857	1.08302	-0.485712	-1.18324	-0.938481	1	DAZL.target
DARS	Dars	ENSG00000115866.6	2	136664247	136743670	80.5821	0.427225	107	1712	79423	16	1	59020	0	2	0	1	1.11503	0.385536	1.35872	0.834552	1.19578	0	DAZL.target
DAZAP1	Dazap1	ENSG00000071626.12	19	1407568	1435719	84.3793	0.579358	113.75	1365	28151	12	0	59116	0	1	0	0	0.677325	0.703973	0.828805	0.753085	0.977209	0	DAZL.target
DAZAP2	Dazap2	ENSG00000183283.11	12	51632076	51665146	103.082	0.507518	186	930	33070	5	1	58929	0	2	0	0	0.582558	0.560559	1.11381	0.63627	0.950562	0	DAZL.target
DCAF7	Dcaf7	ENSG00000136485.10	17	61627822	61671639	66.3969	0.523907	139.625	1117	43817	8	0	59105	2	1	2	0	-1.47681	0.312575	-0.518116	0.472139	0.122637	0	DAZL.target
DCAF8	Dcaf8	ENSG00000132716.14	1	160185505	160254920	92.2746	0.50771	306.611	5519	69415	18	0	58972	0	1	0	0	0.883979	0.873637	0.957237	0.852765	1.10832	0	DAZL.target
DCAF8	Dcaf8	ENSG00000258465.2	1	160187254	160254920	91.6132	0.504191	295.316	5611	67666	19	0	58972	0	1	0	0	0.933645	0.925816	0.986506	0.879605	1.13928	0	DAZL.target
DCPS	Dcps	ENSG00000110063.4	11	126173647	126215644	79.3513	0.566059	175	1050	41997	6	0	59057	1	2	1	0	-0.672618	0.287048	-0.00865523	0.173405	0.158206	0	DAZL.target
DCUN1D5	Dcun1d5	ENSG00000137692.7	11	102932805	102962944	62.2346	0.410143	116.625	933	30139	8	0	59112	0	3	0	1	0.341354	-0.374939	0.593187	-0.0917477	0.212656	0	DAZL.target
DDB1	Ddb1	ENSG00000167986.9	11	61066923	61110068	115.227	0.521415	139.821	3915	43145	28	0	58999	0	2	0	2	1.76841	0.243644	1.66728	1.09631	1.51188	0	DAZL.target
DDHD1	Ddhd1	ENSG00000100523.10	14	53510686	53620000	72.4607	0.429193	200.357	2805	109314	14	0	58991	0	3	0	3	0.691205	-1.3012	0.796252	0.0699067	0.408667	0	DAZL.target
DDIT4	Ddit4	ENSG00000168209.4	10	74033678	74035794	89.5937	0.656988	355.5	711	2116	2	0	58869	0	0	0	0	0.193388	0.156641	0.553008	0.847151	0.970965	0	DAZL.target
DDOST	Ddost	ENSG00000244038.5	1	20978270	20988000	67.63	0.549927	130.636	1437	9730	11	0	58897	2	4	0	0	0.386947	0.457254	-0.404044	-0.288329	-0.348438	0	DAZL.target
DDX10	Ddx10	ENSG00000178105.5	11	108535752	108811657	94.2018	0.411315	155.222	2794	275905	18	0	58975	0	8	0	7	1.33833	-2.52419	1.2508	-0.678437	-0.0828844	0	DAZL.target
DDX17	Ddx17	ENSG00000100201.14	22	38879445	38903665	79.7088	0.489123	168.071	2353	24220	14	0	59129	0	4	0	0	0.662423	0.692338	0.813181	-0.135739	0.231036	0	DAZL.target
DDX21	Ddx21	ENSG00000165732.8	10	70715884	70744829	83.887	0.439504	162.8	2442	28945	15	0	59118	0	9	0	9	0.840292	-2.87279	0.959305	-1.02415	-0.46821	0	DAZL.target
DDX25	Ddx25	ENSG00000109832.8	11	125773271	125793158	49.9782	0.43661	130.636	1437	19887	11	0	58821	3	1	1	0	-0.61462	0.401049	-0.879662	0.499089	-0.0537405	0	DAZL.target
DDX42	Ddx42	ENSG00000198231.8	17	61850963	61896677	93.3614	0.447867	158.842	3018	45714	19	0	59019	20	23	20	22	-2.84641	-2.87279	-2.62354	-2.43079	-2.47163	0	DAZL.target
DDX5	Ddx5	ENSG00000108654.7	17	62495734	62504317	79.5441	0.479228	126.125	2018	8583	16	0	58978	0	4	0	2	0.810366	-0.620578	0.918087	-0.0516847	0.332844	0	DAZL.target
DDX50	Ddx50	ENSG00000107625.8	10	70661034	70706603	88.25	0.422633	154.867	2323	45569	15	0	58991	0	1	0	0	0.94541	0.93614	1.04753	0.87086	1.16568	0	DAZL.target
DDX6	Ddx6	ENSG00000110367.7	11	118620034	118661858	87.1004	0.430643	124	1488	41824	12	0	58861	1	2	1	1	-0.122562	0.0105914	0.410521	0.467022	0.551409	0	DAZL.target
DENND2C	Dennd2c	ENSG00000175984.10	1	115125469	115213043	99.8715	0.427864	160.059	2721	87574	17	0	58992	3	1	1	0	0.278565	1.16205	-0.166018	1.01691	0.613252	0	DAZL.target
DENND5A	Dennd5a	ENSG00000184014.3	11	9160372	9286937	117.938	0.504885	174	4002	126565	23	0	59079	1	6	1	2	0.684705	0.0829383	1.01472	-0.00194601	0.392226	0	DAZL.target
DENR	Denr	ENSG00000139726.6	12	123237321	123255611	44.2775	0.403951	88.2857	618	18290	7	0	58890	0	2	0	0	0.129451	0.235115	0.433358	0.0819405	0.302535	0	DAZL.target
DESI2	Desi2	ENSG00000121644.14	1	244816237	244872335	82.2363	0.431567	123	615	56098	5	0	59203	1	5	1	3	-0.557783	-1.66634	0.111898	-0.546731	-0.330029	0	DAZL.target
DGAT2	Dgat2	ENSG00000062282.10	11	75470557	75512579	105.704	0.5684	151.875	1215	42022	8	0	59000	0	3	0	0	0.675448	0.636359	0.927765	0.19194	0.537581	0	DAZL.target
DGKD	Dgkd	ENSG00000077044.5	2	234263153	234380750	92.2369	0.556069	135.429	3792	117597	28	0	59044	0	10	0	0	1.54476	1.59628	1.36784	-0.800546	-0.186931	0	DAZL.target
DGKE	Dgke	ENSG00000153933.5	17	54911460	54946036	74.4537	0.426727	168	1848	34576	11	0	58780	0	0	0	0	0.554271	0.585144	0.749625	1.01564	1.19744	0	DAZL.target
DHCR7	Dhcr7	ENSG00000172893.11	11	71139239	71163914	71.8649	0.577479	238.857	1672	24675	7	0	58918	1	2	1	0	-0.749741	0.213026	-0.0830679	0.118612	0.0857919	0	DAZL.target
DHDDS	Dhdds	ENSG00000117682.12	1	26758773	26797785	99.9199	0.52964	145.125	1161	39012	8	0	59170	2	1	1	1	-0.313937	-0.201338	-0.142559	0.741866	0.470422	0	DAZL.target
DHX35	Dhx35	ENSG00000101452.10	20	37590942	37668366	111.378	0.485609	102.864	2263	77424	22	0	59065	21	2	7	1	-2.84641	0.73579	-2.62354	0.946629	-1.27581	0	DAZL.target
DHX9	Dhx9	ENSG00000135829.12	1	182808504	182856886	91.2564	0.435988	150.038	3901	48382	26	0	59025	1	2	1	0	0.566326	1.47091	0.843806	0.843104	0.986924	0	DAZL.target
DICER1	Dicer1	ENSG00000100697.10	14	95552565	95624347	115.708	0.424647	230.154	5984	71782	26	0	59156	3	19	3	15	-0.662	-2.87279	0.244261	-1.7006	-1.07242	0	DAZL.target
DIDO1	Dido1	ENSG00000101191.12	20	61509090	61569304	103.143	0.52148	465.8	6987	60214	15	0	58971	1	3	0	0	0.758425	0.700656	0.377892	0.202879	0.329148	0	DAZL.target
DLAT	Dlat	ENSG00000150768.11	11	111895538	111935114	93.8134	0.460392	139	2085	39576	15	1	58931	6	2	4	1	-1.91821	0.305831	-0.999214	0.874413	0.0935098	1	DAZL.target
DLX1	Dlx1	ENSG00000144355.10	2	172949468	172954405	115.139	0.607094	341.333	1024	4937	3	0	58937	0	0	0	0	0.447106	0.344866	0.846977	1.07568	1.25662	0	DAZL.target
DMXL2	Dmxl2	ENSG00000104093.9	15	51739908	51915030	89.0076	0.412265	218.279	9386	175122	43	0	59047	2	5	2	1	0.502916	1.51008	0.731139	0.424128	0.611871	0	DAZL.target
DNAJA2	Dnaja2	ENSG00000069345.7	16	46989299	47007699	109.679	0.420454	130.2	1302	18400	10	0	59080	0	9	0	2	0.956286	-0.592464	1.18192	-0.888083	-0.278653	0	DAZL.target
DNAJA4	Dnaja4	ENSG00000140403.8	15	78556428	78574538	68.8928	0.489387	171.375	1371	18110	8	2	58931	0	0	0	0	0.515002	0.578704	1.24108	1.54904	1.69929	0	DAZL.target
DNAJB4	Dnajb4	ENSG00000162616.8	1	78444859	78483648	86.3089	0.390107	344	1032	38789	3	0	59184	0	0	0	0	0.269096	0.253495	0.632094	0.846261	1.03109	0	DAZL.target
DNAJC10	Dnajc10	ENSG00000077232.12	2	183580999	183659191	79.9092	0.382704	114.273	2514	78192	22	0	59056	1	2	1	1	0.463377	0.610357	0.759683	0.732162	0.879803	0	DAZL.target
DNAJC12	Dnajc12	ENSG00000108176.10	10	69556427	69597924	106.066	0.445151	130.8	654	41497	5	0	59064	2	2	2	1	-1.10433	-0.238242	-0.0840958	0.422771	0.290538	0	DAZL.target
DNAJC7	Dnajc7	ENSG00000168259.10	17	40128451	40173394	74.0039	0.439186	102.4	1536	44943	15	0	58946	2	2	0	0	0.808077	0.866255	-0.0949789	0.456672	0.306213	0	DAZL.target
DNAJC8	Dnajc8	ENSG00000126698.6	1	28525967	28559536	87.1628	0.433473	90.6667	816	33569	9	1	59102	0	1	0	0	0.787007	0.802873	1.195	1.02161	1.31003	0	DAZL.target
DNMT1	Dnmt1	ENSG00000130816.10	19	10244021	10341962	96.558	0.533358	134.125	5365	97941	40	0	58932	3	7	3	4	-0.348183	-0.490705	0.292865	-0.0122964	0.139937	0	DAZL.target
DNMT3A	Dnmt3a	ENSG00000119772.12	2	25455845	25565459	76.8326	0.579645	127.348	2929	109614	23	0	58727	16	2	6	0	-2.84641	1.26062	-2.62354	0.641251	-1.30301	0	DAZL.target
DNTTIP1	Dnttip1	ENSG00000101457.8	20	44420576	44440066	79.8467	0.55746	83.1429	1164	19490	14	0	58949	13	2	0	0	0.745633	0.795736	-2.62354	0.462414	-1.23223	0	DAZL.target
DNTTIP2	Dnttip2	ENSG00000067334.9	1	94333373	94345474	79.729	0.420584	330.429	2313	12101	7	0	58916	1	1	1	1	-0.622073	-0.505901	0.0695852	0.494533	0.443649	0	DAZL.target
DOCK1	Dock1	ENSG00000150760.8	10	128593978	129250781	61.2537	0.469805	115.314	5881	656803	51	0	59060	7	10	5	8	-1.08259	-1.52715	-0.981483	-0.574515	-0.668242	0	DAZL.target
DOCK9	Dock9	ENSG00000088387.13	13	99445741	99738879	54.2388	0.473008	115.492	6814	293138	59	0	59075	0	0	0	0	2.29751	2.61747	1.6386	1.85576	2.08287	0	DAZL.target
DOT1L	Dot1l	ENSG00000104885.13	19	2164148	2232577	76.9068	0.575602	203.321	5693	68429	28	0	58709	1	4	1	2	0.355271	-0.140958	0.588615	0.170858	0.36242	0	DAZL.target
DPF2	Dpf2	ENSG00000133884.5	11	65101225	65120720	81.1298	0.545324	112.909	1242	19495	11	0	59060	1	4	0	2	0.558695	-0.86044	0.213974	-0.176383	-0.0244452	0	DAZL.target
DPH6	Dph6	ENSG00000134146.7	15	35509546	35838394	88.2825	0.403487	117.778	1060	328848	9	0	59093	5	0	5	0	-2.66385	0.990387	-1.15004	1.1057	0.0993174	0	DAZL.target
DR1	Dr1	ENSG00000117505.8	1	93811445	93835055	58.3522	0.431507	183	549	23610	3	0	58934	0	0	0	0	-0.0796083	0.00881112	0.308236	0.667323	0.765135	0	DAZL.target
DSN1	Dsn1	ENSG00000149636.11	20	35380194	35402221	87.9466	0.427082	113.1	1131	22027	10	0	59170	9	3	0	2	0.698016	-0.764577	-2.25532	0.146829	-0.902962	0	DAZL.target
DSTYK	Dstyk	ENSG00000133059.12	1	205111632	205180727	83.8814	0.526578	224.462	2918	69095	13	0	59094	1	2	1	0	-0.297353	0.644723	0.23284	0.366183	0.397402	0	DAZL.target
DTNA	Dtna	ENSG00000134769.17	18	32073254	32471808	86.4999	0.482099	103	2472	398554	24	0	58924	2	5	2	5	-0.132913	-1.35537	0.29758	-0.0220618	0.124367	0	DAZL.target
DUSP14	Dusp14	ENSG00000161326.8	17	35849937	35873603	72.292	0.548013	603	603	23666	1	2	58427	4	15	0	0	0.00689115	0.0969827	-0.875131	-1.82144	-1.61962	1	DAZL.target
DUT	Dut	ENSG00000128951.9	15	48623208	48635570	64.0029	0.451475	108	648	12362	6	0	59135	0	16	0	15	0.152217	-2.87279	0.465845	-2.32289	-1.7196	0	DAZL.target
DVL2	Dvl2	ENSG00000004975.7	17	7128660	7137864	90.469	0.593416	151.188	2419	9204	16	0	59084	2	2	0	0	0.920058	0.900968	0.0128022	0.574579	0.42059	0	DAZL.target
DYNC1LI2	Dync1li2	ENSG00000135720.8	16	66754796	66785701	77.8609	0.504518	115.429	1616	30905	14	0	58871	1	0	1	0	-0.220352	0.746612	0.287431	1.11882	0.973759	0	DAZL.target
DYNLL2	Dynll2	ENSG00000264364.2	17	56160776	56172897	81.6063	0.472488	141	282	12121	2	0	59103	0	0	0	0	0.0617172	0.0961446	0.458967	0.791781	0.917899	0	DAZL.target
DYNLRB1	Dynlrb1	ENSG00000125971.12	20	33104214	33128762	85.0886	0.47169	108	432	24548	4	0	58814	8	0	0	0	0.245255	0.273134	-2.34716	0.895408	-0.696324	0	DAZL.target
DYRK1A	Dyrk1a	ENSG00000157540.15	21	38738092	38889753	82.4226	0.45417	225.545	2481	151661	11	0	59088	0	4	0	2	0.608747	-0.786074	0.756539	-0.223937	0.148535	0	DAZL.target
DZIP3	Dzip3	ENSG00000198919.8	3	108308529	108413693	86.6747	0.387899	125.645	3895	105164	31	0	58878	8	6	7	4	-2.72642	-0.743602	-1.34511	-0.00353788	-0.467129	0	DAZL.target
E2F1	E2f1	ENSG00000101412.9	20	32263489	32274210	55.2332	0.606986	181.5	1089	10721	6	0	59199	4	3	0	0	0.00114282	0.0884421	-1.44891	-0.251984	-0.789097	0	DAZL.target
E2F6	E2f6	ENSG00000169016.12	2	11584501	11606297	56.8746	0.448196	105.333	948	21796	9	0	59008	0	5	0	1	0.262087	-0.423526	0.515328	-0.606868	-0.257297	0	DAZL.target
EED	Eed	ENSG00000074266.13	11	85955586	85989855	82.706	0.39769	120.083	1441	34269	12	0	59028	0	3	0	0	0.822173	0.818388	0.96868	0.182722	0.565068	0	DAZL.target
EEF2K	Eef2k	ENSG00000103319.7	16	22217603	22298554	80.9792	0.569134	134.294	2283	80951	17	3	59056	35	32	4	0	-1.66598	1.37867	-2.62354	-2.08227	-2.47163	1	DAZL.target
EFTUD2	Eftud2	ENSG00000108883.8	17	42927311	42977030	93.916	0.503231	110.37	2980	49719	27	3	59080	0	0	0	0	1.96465	1.96822	2.58181	2.74252	3.02195	0	DAZL.target
EGR2	Egr2	ENSG00000122877.9	10	64571756	64679660	128.47	0.590631	721.5	1443	107904	2	0	58842	1	0	0	0	0.463349	0.377512	0.362442	1.05004	0.926977	0	DAZL.target
EHD1	Ehd1	ENSG00000110047.13	11	64619114	64655768	68.4073	0.596455	279.667	1678	36654	6	0	58774	0	2	0	1	0.0760504	-0.64868	0.381032	0.055714	0.249837	0	DAZL.target
EI24	Ei24	ENSG00000149547.10	11	125439112	125454575	82.0327	0.466628	119	1190	15463	10	0	58944	2	2	2	1	-1.14971	-0.209881	-0.229709	0.350117	0.176989	0	DAZL.target
EID1	Eid1	ENSG00000255302.3	15	49170083	49172380	63.0855	0.570423	567	567	2297	1	0	58863	0	0	0	0	-0.372403	-0.270833	0.092863	0.486295	0.524456	0	DAZL.target
EID2	Eid2	ENSG00000176396.9	19	40028890	40030870	74.5762	0.643454	717	717	1980	1	0	58908	0	2	0	0	-0.172424	-0.133501	0.248733	-0.126723	0.0486548	0	DAZL.target
EIF2S2	Eif2s2	ENSG00000125977.6	20	32676104	32700138	62.8491	0.415408	117.333	1056	24034	9	0	58982	8	1	0	0	0.386693	0.449857	-2.30473	0.544823	-0.801623	0	DAZL.target
EIF3A	Eif3a	ENSG00000107581.8	10	120794356	120840316	108.324	0.449865	193.952	4073	45960	21	0	58879	4	10	3	7	-1.01893	-2.61896	-0.374045	-0.835325	-0.637481	0	DAZL.target
EIF3D	Eif3d	ENSG00000100353.13	22	36906897	36925483	108.132	0.496215	134.571	1884	18586	14	0	58987	0	13	0	0	1.02592	0.966725	1.1839	-1.41043	-0.735671	0	DAZL.target
EIF3M	Eif3m	ENSG00000149100.8	11	32605344	32627808	89.4068	0.404895	117.25	1407	22464	12	0	59054	0	40	0	12	0.875694	-2.87279	1.03159	-2.53125	-2.47163	0	DAZL.target
EIF4A1	Eif4a1	ENSG00000161960.10	17	7476024	7482323	93.8062	0.522828	161.846	2104	6299	13	0	59035	1	1	0	1	0.753141	-0.0491926	0.395856	0.818489	0.797557	0	DAZL.target
EIF4EBP2	Eif4ebp2	ENSG00000148730.6	10	72164135	72188374	54.7132	0.549028	127	381	24239	3	0	58829	0	1	0	1	-0.193291	-0.85598	0.192957	0.256715	0.362856	0	DAZL.target
EIF4ENIF1	Eif4enif1	ENSG00000184708.13	22	31832963	31892094	97.3032	0.509945	170.389	3067	59131	18	1	59054	0	1	0	0	1.20864	1.20548	1.45926	1.27005	1.58283	0	DAZL.target
EIF4G2	Eif4g2	ENSG00000110321.11	11	10818597	10830657	107.775	0.444117	139.909	3078	12060	22	0	58923	2	2	1	1	0.560798	0.6097	0.47994	0.905645	0.856589	0	DAZL.target
EIF5B	Eif5b	ENSG00000158417.6	2	99953816	100017789	74.7909	0.40114	147.636	3248	63973	22	0	58911	0	1	0	0	1.20484	1.23572	1.15743	0.969313	1.27654	0	DAZL.target
ELAC2	Elac2	ENSG00000006744.14	17	12895708	12921504	106.483	0.538416	111.5	2676	25796	24	0	59068	3	10	2	5	-0.179307	-1.58759	0.0648316	-0.736705	-0.44663	0	DAZL.target
ELAVL1	Elavl1	ENSG00000066044.9	19	8023463	8070543	76.3922	0.511725	176.167	1057	47080	6	0	59138	0	2	0	0	0.196237	0.26235	0.497127	0.143418	0.371971	0	DAZL.target
ELL	Ell	ENSG00000105656.8	19	18553473	18632937	69.9063	0.592701	166.818	1835	79464	11	0	58655	1	0	0	0	0.454412	0.535893	0.0750288	0.958162	0.76255	0	DAZL.target
ELOVL1	Elovl1	ENSG00000066322.8	1	43829068	43833696	98.2002	0.52598	126	882	4628	7	0	59087	2	4	0	0	0.513385	0.490377	-0.189173	-0.154497	-0.158748	0	DAZL.target
EMC3	Emc3	ENSG00000125037.8	3	10004221	10052800	90.2762	0.445986	120.875	967	48579	8	3	59092	4	4	1	0	0.11718	1.01523	0.236536	0.984763	0.699621	1	DAZL.target
EMC6	Emc6	ENSG00000127774.6	17	3572109	3572962	44.5165	0.629412	339	339	853	1	0	58936	2	4	0	0	-0.404267	-0.287651	-0.955389	-0.747672	-0.922295	0	DAZL.target
EMG1	Emg1	ENSG00000126749.10	12	7072408	7105520	60.1727	0.505387	125.333	752	33112	6	0	59087	0	1	0	0	0.049137	0.158793	0.364093	0.382217	0.528296	0	DAZL.target
EML4	Eml4	ENSG00000143924.14	2	42396490	42559688	76.9053	0.432369	137.682	3029	163198	22	0	59022	5	7	4	3	-1.7823	-0.739886	-0.965388	-0.54162	-0.679552	0	DAZL.target
EML5	Eml5	ENSG00000165521.11	14	89078775	89259096	61.0469	0.43116	142.302	6119	180321	43	0	58941	0	7	0	0	1.89271	2.07504	1.46694	-0.202656	0.334899	0	DAZL.target
ENAH	Enah	ENSG00000154380.12	1	225674537	225840844	76.117	0.428569	95.7273	1053	166307	11	0	59011	3	5	3	4	-1.6704	-1.76802	-0.584212	-0.40739	-0.479244	0	DAZL.target
ENSA	Ensa	ENSG00000143420.13	1	150573327	150602088	86.9637	0.500941	106.333	638	28761	6	0	59053	7	11	7	9	-2.84641	-2.87279	-2.01418	-1.55474	-1.71574	0	DAZL.target
ENTPD6	Entpd6	ENSG00000197586.8	20	25176329	25207365	92.8818	0.547635	123	1722	31036	14	0	59017	0	10	0	0	0.851761	0.856442	0.977902	-1.13513	-0.572087	0	DAZL.target
EP300	Ep300	ENSG00000100393.9	22	41487790	41576081	95.1097	0.475381	233.969	7487	88291	32	0	59033	0	0	0	0	1.64949	1.66634	1.43779	1.65121	1.91497	0	DAZL.target
EP400	Ep400	ENSG00000183495.9	12	132434508	132565005	77.2887	0.553255	186.922	9533	130497	51	1	58909	2	22	1	5	1.39258	-0.582474	0.955688	-1.52895	-0.842263	1	DAZL.target
EPAS1	Epas1	ENSG00000116016.9	2	46520806	46613836	81.862	0.549805	169.312	2709	93030	16	0	58926	2	3	2	1	-0.888837	0.0839329	-0.123453	0.177438	0.0937973	0	DAZL.target
EPB41	Epb41	ENSG00000159023.14	1	29213603	29446553	86.6777	0.437757	146.632	2786	232950	19	0	59035	1	1	1	1	0.308531	0.517652	0.606586	0.94425	0.97561	0	DAZL.target
EPB41L3	Epb41l3	ENSG00000082397.11	18	5392383	5630699	103.988	0.502501	167.667	3521	238316	21	0	59043	1	1	0	1	1.41058	0.667515	0.782505	1.10628	1.15442	0	DAZL.target
EPC2	Epc2	ENSG00000135999.7	2	149402009	149545130	49.9841	0.426634	168.133	2522	143121	15	0	58834	1	1	0	1	0.560726	-0.0795767	0.113699	0.583541	0.512632	0	DAZL.target
EPN1	Epn1	ENSG00000063245.10	19	56186592	56221224	33.335	0.663034	186.364	2050	34632	11	0	58826	0	6	0	0	0.179456	0.286938	0.389849	-0.871542	-0.56181	0	DAZL.target
EPN2	Epn2	ENSG00000072134.11	17	19118928	19240028	94.5205	0.56907	225.375	1803	121100	8	2	59094	3	2	2	0	-0.871747	0.847897	0.0796503	1.02208	0.669502	1	DAZL.target
EPS15	Eps15	ENSG00000085832.12	1	51819935	51985000	78.6178	0.431047	117.48	2937	165065	25	0	58936	0	3	0	1	1.41484	0.72614	1.25741	0.449529	0.857888	0	DAZL.target
ERBB2	Erbb2	ENSG00000141736.9	17	37844167	37886679	69.5507	0.60054	156.926	4237	42512	27	0	59023	0	6	0	0	1.21494	1.27938	1.0889	-0.298633	0.1453	0	DAZL.target
ERG	Erg	ENSG00000157554.14	21	39751949	40033704	68.5166	0.505464	164.818	1813	281755	11	0	58981	0	1	0	0	0.538719	0.709436	0.609524	0.544447	0.741997	0	DAZL.target
ERGIC2	Ergic2	ENSG00000087502.13	12	29490285	29534122	71.1146	0.375831	96.3846	1253	43837	13	0	59047	3	1	1	0	-0.0641898	0.870503	-0.450682	0.774809	0.329936	0	DAZL.target
ERI2	Eri2	ENSG00000196678.9	16	20791515	20911671	68.0129	0.42987	204.385	2657	120156	13	0	58961	10	21	0	0	0.593898	0.676666	-2.62354	-2.53125	-2.47163	0	DAZL.target
ERLIN1	Erlin1	ENSG00000107566.9	10	101909851	101948091	55.8689	0.435873	93.0833	1117	38240	12	0	58883	1	5	1	3	-0.447624	-1.48992	0.104969	-0.511409	-0.317511	0	DAZL.target
ERRFI1	Errfi1	ENSG00000116285.8	1	8064464	8086368	146.252	0.446729	485	1455	21904	3	0	59066	0	4	0	2	0.814	-0.864891	1.33313	0.149615	0.628418	0	DAZL.target
ESF1	Esf1	ENSG00000089048.10	20	13694969	13765532	91.9585	0.372841	202.615	2634	70563	13	0	59126	2	9	0	0	0.997582	0.94399	0.118511	-0.967568	-0.612358	0	DAZL.target
ETAA1	Etaa1	ENSG00000143971.7	2	67624451	67637677	65.4641	0.417872	469.5	2817	13226	6	0	59008	0	4	0	4	0.00979231	-2.553	0.374576	-0.556788	-0.245111	0	DAZL.target
ETNK1	Etnk1	ENSG00000139163.11	12	22778009	22843599	75.1304	0.422352	167.444	1507	65590	9	0	58886	1	1	1	1	-0.426932	-0.254523	0.165244	0.590468	0.550332	0	DAZL.target
ETS1	Ets1	ENSG00000134954.10	11	128328656	128457453	86.0978	0.507144	159.7	1597	128797	10	0	59159	0	0	0	0	0.585786	0.654606	0.753386	1.03583	1.20545	0	DAZL.target
ETV3	Etv3	ENSG00000117036.7	1	157090983	157108266	95.0769	0.498796	398	1592	17283	4	0	59084	5	7	5	7	-2.84641	-2.87279	-1.52553	-1.02149	-1.25059	0	DAZL.target
EVI5	Evi5	ENSG00000067208.10	1	92974253	93257961	90.5084	0.397046	141.167	2541	283708	18	0	59122	2	1	2	1	-0.337151	0.635297	0.257173	0.992618	0.818856	0	DAZL.target
EWSR1	Ewsr1	ENSG00000182944.13	22	29663998	29696515	88.2167	0.541229	117.263	2228	32517	19	0	59030	1	11	0	11	1.05634	-2.87279	0.549559	-1.18407	-0.702324	0	DAZL.target
EXD2	Exd2	ENSG00000081177.14	14	69658228	69709075	80.0976	0.51029	224.857	1574	50847	7	0	58922	0	0	0	0	0.259835	0.308828	0.546808	0.873491	1.00585	0	DAZL.target
EXTL2	Extl2	ENSG00000162694.9	1	101337943	101361554	65.4627	0.421882	254.25	1017	23611	4	0	58937	0	1	0	1	0.0344543	-0.692088	0.400049	0.344362	0.524361	0	DAZL.target
F11R	F11r	ENSG00000270149.1	1	160967747	161008752	90.1186	0.510196	96	960	41005	10	0	58675	1	4	0	0	0.638015	0.664767	0.300435	-0.129579	0.0482375	0	DAZL.target
F11R	F11r	ENSG00000158769.13	1	160965001	160991138	90.1186	0.510196	96	960	26137	10	0	58681	1	4	0	0	0.629619	0.648477	0.300401	-0.128137	0.0494691	0	DAZL.target
FAM107B	Fam107b	ENSG00000065809.9	10	14560556	14816896	109.388	0.462006	190.2	951	256340	5	0	59102	0	2	0	2	0.702389	-0.726652	0.921221	0.405075	0.732899	0	DAZL.target
FAM117A	Fam117a	ENSG00000121104.3	17	47787694	47866542	52.4647	0.584146	140.889	1268	78848	9	0	58939	0	0	0	0	0.173783	0.312684	0.39525	0.801791	0.87697	0	DAZL.target
FAM117B	Fam117b	ENSG00000138439.10	2	203499901	203634480	88.6464	0.476564	176	1232	134579	7	0	59233	0	6	0	0	0.471078	0.531033	0.700453	-0.704018	-0.276081	0	DAZL.target
FAM118A	Fam118a	ENSG00000100376.7	22	45704849	45737836	69.0703	0.494609	125.6	1256	32987	10	0	59004	2	3	1	0	-0.533423	0.456297	-0.399471	-0.0483787	-0.173206	0	DAZL.target
FAM118B	Fam118b	ENSG00000197798.4	11	126081309	126132881	110.013	0.488692	162.25	1298	51572	8	0	58994	1	3	1	0	-0.180265	0.680294	0.465357	0.225923	0.382843	0	DAZL.target
FAM168B	Fam168b	ENSG00000152102.13	2	131805449	131851033	61.8315	0.56254	123.6	618	45584	5	3	59102	4	7	0	0	0.464034	0.553861	-0.250371	0.0247607	-0.14369	1	DAZL.target
FAM192A	Fam192a	ENSG00000172775.12	16	57186378	57220028	117.133	0.447485	117.571	823	33650	7	0	58953	0	1	0	0	0.844408	0.752702	1.14142	0.927705	1.24091	0	DAZL.target
FAM204A	Fam204a	ENSG00000165669.9	10	120065401	120101840	81.258	0.385935	106.286	744	36439	7	0	58927	1	0	0	0	0.575925	0.57368	0.280381	1.03016	0.923515	0	DAZL.target
FAM20B	Fam20b	ENSG00000116199.7	1	178994939	179045697	91.5827	0.503634	181.714	1272	50758	7	0	59100	1	0	0	0	0.426987	0.443201	0.171823	0.992117	0.840046	0	DAZL.target
FAM214A	Fam214a	ENSG00000047346.8	15	52873514	53002014	64.8148	0.414903	273.833	3286	128500	12	0	59017	0	3	0	1	0.488382	-0.217902	0.640036	-0.0660831	0.248369	0	DAZL.target
FAM216A	Fam216a	ENSG00000204856.7	12	110906169	110928190	77.5776	0.42292	127.714	894	22021	7	0	59075	3	4	2	1	-1.28666	-0.35006	-0.722935	-0.286619	-0.458376	0	DAZL.target
FAM222B	Fam222b	ENSG00000173065.9	17	27082996	27182250	43.8147	0.583729	661.333	1984	99254	3	1	58656	0	1	0	0	-0.337467	-0.161571	0.27709	0.295767	0.378866	0	DAZL.target
FAM32A	Fam32a	ENSG00000105058.7	19	16296191	16302857	35.3956	0.540758	94	376	6666	4	0	58742	0	1	0	0	-0.322949	-0.16212	0.0930455	0.205253	0.276659	0	DAZL.target
FAM76B	Fam76b	ENSG00000077458.8	11	95502106	95523573	68.2973	0.405815	99.2727	1092	21467	11	0	59000	15	3	14	2	-2.84641	-0.818821	-2.62354	0.0518701	-1.61071	0	DAZL.target
FAM83D	Fam83d	ENSG00000101447.9	20	37554955	37581703	81.5697	0.527498	475.75	1903	26748	4	0	58971	9	1	0	0	-0.0275162	0.00563417	-2.62354	0.324966	-1.20719	0	DAZL.target
FAM98B	Fam98b	ENSG00000171262.7	15	38746328	38779911	61.0112	0.415666	147.857	1035	33583	7	0	58779	0	0	0	0	0.235429	0.306532	0.517698	0.831104	0.969928	0	DAZL.target
FARSA	Farsa	ENSG00000179115.6	19	13033293	13044851	73.8357	0.614162	134.923	1754	11558	13	0	59102	1	2	0	0	0.629097	0.659579	0.22712	0.385285	0.397745	0	DAZL.target
FARSB	Farsb	ENSG00000116120.8	2	223435255	223521056	75.268	0.415373	110.118	1872	85801	17	0	59127	1	0	1	0	0.0846001	1.05266	0.485979	1.23168	1.14154	0	DAZL.target
FBLN1	Fbln1	ENSG00000077942.13	22	45898118	45997015	96.5237	0.577218	137.842	2619	98897	19	0	58978	2	0	2	0	-0.509703	1.20331	0.178567	1.3989	1.0328	0	DAZL.target
FBXL20	Fbxl20	ENSG00000108306.7	17	37415384	37558776	70.7417	0.454692	94.3333	1415	143392	15	0	59087	0	6	0	2	0.812714	-0.523131	0.855531	-0.557778	-0.112841	0	DAZL.target
FBXL22	Fbxl22	ENSG00000197361.5	15	63889552	63894627	34.8764	0.664037	377.5	755	5075	2	0	58476	0	0	0	0	-0.380706	-0.270542	0.0477277	0.496877	0.495748	0	DAZL.target
FBXL3	Fbxl3	ENSG00000005812.6	13	77566740	77601330	85.3655	0.413853	327.75	1311	34590	4	0	59074	1	4	0	0	0.243761	0.239448	0.0655189	-0.394014	-0.227786	0	DAZL.target
FBXO11	Fbxo11	ENSG00000138081.15	2	48016455	48132932	77.5692	0.384847	124.174	2856	116477	23	0	59014	0	6	0	0	1.39469	1.43828	1.28219	-0.256236	0.279464	0	DAZL.target
FBXO21	Fbxo21	ENSG00000135108.10	12	117581146	117628336	104.604	0.482386	155.818	1714	47190	11	0	58957	0	1	0	0	0.832853	0.79606	1.036	0.872204	1.15624	0	DAZL.target
FBXO28	Fbxo28	ENSG00000143756.7	1	224301789	224349749	75.1787	0.465239	227.4	1137	47960	5	0	59077	0	0	0	0	0.139855	0.199328	0.470013	0.794251	0.921827	0	DAZL.target
FBXO3	Fbxo3	ENSG00000110429.9	11	33762485	33796089	88.2537	0.443381	135.455	1490	33604	11	0	58822	2	0	1	0	-0.20539	0.709592	-0.103502	1.13245	0.746848	0	DAZL.target
FBXO33	Fbxo33	ENSG00000165355.7	14	39866873	39901704	54.81	0.491628	423	1692	34831	4	0	58772	1	0	0	0	-0.272732	-0.159981	-0.396567	0.540582	0.275676	0	DAZL.target
FCHSD2	Fchsd2	ENSG00000137478.10	11	72547790	72853306	50.01	0.447953	119.526	2271	305516	19	0	59155	2	4	1	3	-0.0238685	-0.94828	-0.198729	-0.160404	-0.17785	0	DAZL.target
FGD6	Fgd6	ENSG00000180263.9	12	95470525	95611258	81.5772	0.421169	212.286	4458	140733	21	1	58678	5	3	4	2	-1.7268	-0.126341	-0.668105	0.611091	0.123117	1	DAZL.target
FKBP3	Fkbp3	ENSG00000100442.6	14	45584803	45604522	82.5665	0.408415	102.429	717	19719	7	0	59060	1	2	0	0	0.519281	0.520697	0.244279	0.320261	0.38357	0	DAZL.target
FKBP4	Fkbp4	ENSG00000004478.5	12	2904119	2914576	76.8518	0.529394	144	1440	10457	10	0	59089	0	8	0	0	0.41915	0.462619	0.648155	-1.07032	-0.614007	0	DAZL.target
FLCN	Flcn	ENSG00000154803.8	17	17115526	17140502	99.6561	0.598552	196.455	2161	24976	11	2	59022	1	3	0	0	1.0384	0.987131	1.14003	0.904893	1.05977	0	DAZL.target
FN1	Fn1	ENSG00000115414.14	2	216225163	216300895	101.582	0.510257	168.609	7756	75732	46	0	59003	2	3	2	1	0.56224	1.52285	0.846928	1.02801	1.06828	0	DAZL.target
FNBP1L	Fnbp1l	ENSG00000137942.12	1	93913688	94020218	37.9751	0.425097	116.375	1862	106530	16	0	58897	0	0	0	0	0.530827	0.702046	0.633752	0.967375	1.09722	0	DAZL.target
FNBP4	Fnbp4	ENSG00000109920.8	11	47738072	47788995	99.7305	0.444368	183.125	2930	50923	16	0	58725	0	3	0	1	1.05702	0.229045	1.15714	0.35055	0.754948	0	DAZL.target
FOXF1	Foxf1	ENSG00000103241.5	16	86544133	86548076	65.9459	0.644541	576	1152	3943	2	0	58560	0	0	0	0	-0.189906	-0.143247	0.212886	0.574312	0.630296	0	DAZL.target
FOXJ3	Foxj3	ENSG00000198815.4	1	42642210	42801548	93.8329	0.448524	166.667	2000	159338	12	0	59110	0	1	0	1	0.861078	0.115518	0.970842	0.802324	1.08288	0	DAZL.target
FOXN2	Foxn2	ENSG00000170802.11	2	48541776	48606433	82.3196	0.394313	265.2	1326	64657	5	0	58922	1	1	1	0	-0.548208	0.368437	0.128894	0.515417	0.485005	0	DAZL.target
FRMD6	Frmd6	ENSG00000139926.11	14	51955818	52197445	74.2782	0.451714	154.538	2009	241627	13	0	58878	0	4	0	2	0.749208	-0.584445	0.791718	-0.195869	0.179424	0	DAZL.target
FRS2	Frs2	ENSG00000166225.4	12	69864129	69973562	76.7423	0.440006	311.4	1557	109433	5	0	58967	0	1	0	0	0.186873	0.255448	0.490665	0.40452	0.603165	0	DAZL.target
FTO	Fto	ENSG00000140718.14	16	53737875	54155853	94.8675	0.492691	189.556	1706	417978	9	0	59075	5	0	5	0	-2.74061	0.932104	-1.2367	1.06132	0.0222933	0	DAZL.target
FUBP1	Fubp1	ENSG00000162613.12	1	78409740	78444794	73.6685	0.461184	97.4091	2143	35054	22	0	58933	0	6	0	1	1.11758	0.403383	1.08862	-0.351839	0.12457	0	DAZL.target
FUS	Fus	ENSG00000089280.14	16	31191431	31203127	109.68	0.535934	108.727	1196	11696	11	0	59147	0	2	0	0	0.89591	0.836347	1.1073	0.626613	0.960849	0	DAZL.target
FUZ	Fuz	ENSG00000010361.9	19	50310126	50320633	68.7985	0.600724	191	2101	10507	11	1	58930	3	16	2	10	-1.16508	-2.87279	-0.479157	-1.89961	-1.53194	1	DAZL.target
G2E3	G2e3	ENSG00000092140.10	14	31028329	31089269	80.8297	0.373565	160.143	2242	60940	14	0	58942	0	2	0	1	0.953947	0.156233	1.04452	0.508544	0.867616	0	DAZL.target
GABPB2	Gabpb2	ENSG00000143458.7	1	151043054	151098018	74.481	0.481148	174.375	1395	54964	8	0	59227	3	6	2	0	-1.37964	0.378457	-0.831118	-0.783618	-0.842561	0	DAZL.target
GALNT1	Galnt1	ENSG00000141429.9	18	33161081	33291798	86.2803	0.418525	158.909	1748	130717	11	0	59064	0	3	0	3	0.773466	-1.24437	0.905928	0.130592	0.49995	0	DAZL.target
GANAB	Ganab	ENSG00000089597.12	11	62392298	62414104	102.587	0.550994	122.12	3053	21806	25	0	59005	1	2	0	1	1.49875	0.686938	0.896601	0.916138	1.04761	0	DAZL.target
GAS2L3	Gas2l3	ENSG00000139354.6	12	100967461	101022064	85.4331	0.401289	266.625	2133	54603	8	0	58981	0	2	0	0	0.520933	0.504521	0.77259	0.289532	0.599808	0	DAZL.target
GATAD2A	Gatad2a	ENSG00000167491.13	19	19496635	19619740	72.6692	0.610407	168.583	2023	123105	12	0	59089	0	3	0	0	0.588489	0.672442	0.690403	0.0300564	0.31836	0	DAZL.target
GCLM	Gclm	ENSG00000023909.5	1	94350761	94374966	82.4515	0.403105	122.5	735	24205	6	0	59063	0	0	0	0	0.462153	0.461217	0.742531	0.982038	1.17579	0	DAZL.target
GDI2	Gdi2	ENSG00000057608.12	10	5807186	5884095	91.909	0.436797	127.636	1404	76909	11	0	59175	0	1	0	0	0.795713	0.806322	0.957208	0.79638	1.07553	0	DAZL.target
GDPD1	Gdpd1	ENSG00000153982.6	17	57297828	57353328	90.9484	0.411316	105.4	1054	55500	10	0	59115	1	26	0	15	0.797548	-2.87279	0.44223	-2.53125	-2.07555	0	DAZL.target
GFRA1	Gfra1	ENSG00000151892.10	10	117816444	118032979	56.1265	0.505678	145.5	1455	216535	10	0	58716	0	0	0	0	0.325511	0.516766	0.465144	0.825945	0.930605	0	DAZL.target
GGA2	Gga2	ENSG00000103365.11	16	23474863	23533316	86.2192	0.531113	154	2464	58453	16	0	58909	1	2	1	1	-0.0584472	0.101912	0.401541	0.509051	0.565517	0	DAZL.target
GGNBP2	Ggnbp2	ENSG00000005955.8	17	34900737	34946278	104.001	0.42908	191.923	2495	45541	13	2	59221	4	74	0	1	1.27117	0.423101	0.117786	-2.53125	-2.47163	1	DAZL.target
GHITM	Ghitm	ENSG00000165678.15	10	85899196	85913001	78.9739	0.463043	135.75	1086	13805	8	0	58973	0	6	0	0	0.392748	0.424281	0.659364	-0.721415	-0.303619	0	DAZL.target
GID8	Gid8	ENSG00000101193.6	20	61569471	61576996	66.8019	0.497449	177.75	711	7525	4	0	59287	0	3	0	1	-0.0345876	-0.738142	0.338877	-0.261071	-0.0186282	0	DAZL.target
GINS2	Gins2	ENSG00000131153.4	16	85709804	85723679	74.0997	0.514511	118	590	13875	5	0	59104	4	2	4	0	-2.84641	0.19492	-1.30244	0.127113	-0.482348	0	DAZL.target
GIT2	Git2	ENSG00000139436.16	12	110367607	110434194	103.285	0.476675	99.9545	2199	66587	22	0	59117	3	1	0	0	1.45576	1.4491	0.0153606	1.19591	0.80429	0	DAZL.target
GJC1	Gjc1	ENSG00000182963.5	17	42875816	42908184	140.452	0.492487	1197	1197	32368	1	3	58607	0	0	0	0	0.848241	0.693674	2.15534	2.19022	2.42783	0	DAZL.target
GLCE	Glce	ENSG00000138604.5	15	69452923	69564556	117.275	0.43105	624	1872	111633	3	0	58960	0	0	0	0	0.457047	0.390243	0.858588	0.992347	1.21254	0	DAZL.target
GLS	Gls	ENSG00000115419.8	2	191745553	191830278	75.6157	0.375689	120.176	2043	84725	17	0	58934	6	5	4	4	-1.91132	-1.46547	-1.28771	-0.198978	-0.605805	0	DAZL.target
GLUL	Glul	ENSG00000135821.12	1	182350839	182361341	148.074	0.53464	193	1158	10502	6	0	59062	1	1	0	0	1.05463	0.833553	0.952629	1.21204	1.28579	0	DAZL.target
GLYR1	Glyr1	ENSG00000140632.12	16	4853204	4897343	96.8388	0.525328	109.875	1758	44139	16	0	59105	2	3	1	1	0.114097	0.244415	0.109923	0.352236	0.315717	0	DAZL.target
GMEB2	Gmeb2	ENSG00000101216.6	20	62218955	62258394	66.3784	0.599655	183	1647	39439	9	0	58981	1	4	0	0	0.283486	0.352581	-0.0268416	-0.363477	-0.264235	0	DAZL.target
GMFB	Gmfb	ENSG00000197045.8	14	54941202	54955914	51.418	0.3926	72.5714	508	14712	7	0	58968	0	0	0	0	0.2454	0.325395	0.526212	0.841351	0.980023	0	DAZL.target
GNA11	Gna11	ENSG00000088256.4	19	3094408	3124002	76.1638	0.603276	160.286	1122	29594	7	0	59086	0	204	0	182	0.30217	-2.87279	0.557591	-2.53125	-2.47163	0	DAZL.target
GNA13	Gna13	ENSG00000120063.5	17	63006833	63052957	112.525	0.468796	289.5	1158	46124	4	1	59094	0	1	0	1	0.631172	-0.210125	1.20387	0.995367	1.28664	0	DAZL.target
GNAI3	Gnai3	ENSG00000065135.7	1	110091233	110136975	83.3995	0.428825	139.125	1113	45742	8	0	59001	0	4	0	1	0.521419	-0.242717	0.761526	-0.225898	0.153618	0	DAZL.target
GNPNAT1	Gnpnat1	ENSG00000100522.4	14	53241912	53258386	81.0204	0.384031	117	585	16474	5	0	58912	0	3	0	0	0.443862	0.430508	0.739431	-0.0201955	0.330835	0	DAZL.target
GNPTG	Gnptg	ENSG00000090581.5	16	1401924	1413352	69.2053	0.597682	95.7778	862	11428	9	0	58735	3	15	3	1	-2.02686	-0.353855	-0.821426	-2.08881	-1.777	0	DAZL.target
GOT2	Got2	ENSG00000125166.8	16	58741035	58768261	97.1526	0.53641	135.3	1353	27226	10	0	59014	3	1	3	1	-1.71729	-0.122568	-0.514208	0.780197	0.295254	0	DAZL.target
GPAM	Gpam	ENSG00000119927.9	10	113909624	113975135	83.2191	0.446051	130.9	2618	65511	20	0	59077	1	5	1	3	0.21573	-0.893444	0.586612	-0.136478	0.147184	0	DAZL.target
GPATCH8	Gpatch8	ENSG00000186566.7	17	42472652	42580798	81.0683	0.463659	786.778	7081	108146	9	3	58884	0	0	0	0	0.573622	0.583357	1.57944	1.8793	2.01074	0	DAZL.target
GPN3	Gpn3	ENSG00000111231.4	12	110890289	110907073	74.027	0.452291	122.222	1100	16784	9	0	58985	2	4	1	0	-0.487347	0.468286	-0.332812	-0.274628	-0.297301	0	DAZL.target
GPT2	Gpt2	ENSG00000166123.9	16	46918290	46965209	99.8513	0.5762	161.727	1779	46919	11	0	58671	0	11	0	2	0.76598	-0.724786	0.948002	-1.32688	-0.743716	0	DAZL.target
GRB2	Grb2	ENSG00000177885.9	17	73314157	73401790	118.39	0.496658	136.8	684	87633	5	0	59086	2	8	0	0	0.700765	0.646322	0.0263397	-0.831117	-0.563185	0	DAZL.target
GSE1	Gse1	ENSG00000131149.13	16	85645015	85709810	60.0207	0.620357	228.067	3421	64795	15	0	59130	0	6	0	2	0.525467	-0.859548	0.623907	-0.692552	-0.320585	0	DAZL.target
GSK3B	Gsk3b	ENSG00000082701.10	3	119540170	119813264	100.833	0.46211	127.917	1535	273094	12	0	58954	1	2	1	0	0.127063	1.10038	0.54462	0.553222	0.661098	0	DAZL.target
GSPT1	Gspt1	ENSG00000103342.8	16	11961985	12009939	63.3747	0.446407	146.2	2193	47954	15	0	59053	0	4	0	3	0.628246	-1.3454	0.747776	-0.193029	0.16299	0	DAZL.target
GTF2A1	Gtf2a1	ENSG00000165417.7	14	81641796	81687721	60.2715	0.418783	92.4286	647	45925	7	0	58935	0	11	0	8	0.269251	-2.87279	0.534079	-1.66991	-1.14292	0	DAZL.target
GTF2E1	Gtf2e1	ENSG00000153767.5	3	120461484	120501916	129.855	0.4744	336	1344	40432	4	1	58910	2	3	1	1	-0.0935919	-0.0961535	0.438949	0.556595	0.568638	1	DAZL.target
GTF2F2	Gtf2f2	ENSG00000188342.7	13	45694650	45858237	63.4186	0.43278	99.75	798	163587	8	0	59108	3	1	0	0	0.394738	0.533924	-0.827698	0.50353	-0.0238427	0	DAZL.target
GTF2H1	Gtf2h1	ENSG00000110768.7	11	18343842	18388591	91.6343	0.407715	131	1834	44749	14	0	59130	0	1	0	0	0.997521	0.973997	1.10721	0.90474	1.2159	0	DAZL.target
GTF2H3	Gtf2h3	ENSG00000111358.9	12	124118375	124147153	75.1244	0.439721	78.3846	1019	28778	13	0	58969	9	45	2	0	-0.965162	0.783948	-2.29707	-2.53125	-2.47163	0	DAZL.target
GTPBP4	Gtpbp4	ENSG00000107937.14	10	1034338	1065876	84.4599	0.457601	129.5	2331	31538	18	0	59075	1	9	0	1	1.00437	0.24135	0.524435	-0.929804	-0.496545	0	DAZL.target
GUCY2C	Gucy2c	ENSG00000070019.3	12	14765576	14849519	92.8249	0.450019	129.556	3498	83943	27	0	59120	5	1	4	0	-1.44257	1.58334	-0.668489	1.20756	0.443416	0	DAZL.target
H2AFY2	H2afy2	ENSG00000099284.9	10	71812552	71872036	80.1366	0.535725	145.875	1167	59484	8	0	58736	0	0	0	0	0.373789	0.434911	0.614206	0.942657	1.08023	0	DAZL.target
H3F3A	H3f3a	ENSG00000163041.5	1	226249552	226259702	34.3556	0.497091	172.333	517	10150	3	0	58966	0	0	0	0	-0.420478	-0.258076	0.0376317	0.515002	0.527461	0	DAZL.target
H3F3B	H3f3b	ENSG00000132475.4	17	73772515	73781974	42.5854	0.620604	211.75	847	9459	4	0	58877	2	0	0	0	-0.230938	-0.115821	-0.85141	0.602464	0.0329516	0	DAZL.target
HAT1	Hat1	ENSG00000128708.8	2	172778958	172848599	73.1038	0.392438	127.727	1405	69641	11	0	58959	0	1	0	0	0.688204	0.726654	0.838982	0.687503	0.952381	0	DAZL.target
HDAC1	Hdac1	ENSG00000116478.7	1	32757687	32799236	90.3653	0.501944	114.929	1609	41549	14	0	59107	0	0	0	0	0.8435	0.864192	0.968081	1.22108	1.4247	0	DAZL.target
HDGF	Hdgf	ENSG00000143321.14	1	156711899	156736717	78.4612	0.589863	117.889	1061	24818	9	0	58848	0	1	0	0	0.451382	0.491499	0.663946	0.62063	0.81503	0	DAZL.target
HEATR1	Heatr1	ENSG00000119285.6	1	236712305	236767804	87.6129	0.417983	152.318	6702	55499	44	0	58908	1	34	1	1	1.25296	1.42382	1.23629	-2.53125	-1.70841	0	DAZL.target
HECTD1	Hectd1	ENSG00000092148.8	14	31569318	31677010	85.3157	0.415302	193.357	8121	107692	42	0	59001	1	1	0	0	2.07529	2.14343	1.13726	1.46258	1.54328	0	DAZL.target
HECTD2	Hectd2	ENSG00000165338.12	10	93170096	93274586	79.1635	0.37516	125.3	2506	104490	20	0	59043	1	1	1	1	0.38464	0.534575	0.702502	0.99834	1.05905	0	DAZL.target
HELLS	Hells	ENSG00000119969.10	10	96305547	96373662	73.0168	0.389454	120.409	2649	68115	22	0	59071	4	4	4	2	-1.74642	-0.160151	-0.570078	0.127632	-0.110469	0	DAZL.target
HENMT1	Henmt1	ENSG00000162639.11	1	109190912	109204148	68.7323	0.414439	174.857	1224	13236	7	0	59076	0	3	0	1	0.290583	-0.457221	0.58037	-0.112347	0.194291	0	DAZL.target
HERC1	Herc1	ENSG00000103657.9	15	63900817	64126141	71.1816	0.4707	194.842	14808	225324	76	0	58866	1	0	1	0	1.9276	3.30062	1.37114	2.27327	2.14107	0	DAZL.target
HERPUD1	Herpud1	ENSG00000051108.10	16	56965960	56977798	120.43	0.51428	188.125	1505	11838	8	0	59140	0	0	0	0	0.801876	0.691613	1.1169	1.30661	1.5427	0	DAZL.target
HEXIM1	Hexim1	ENSG00000186834.2	17	43224684	43229468	91.423	0.624655	1086	1086	4784	1	3	59110	0	0	0	0	0.32139	0.309726	1.50779	1.73642	1.84376	0	DAZL.target
HIF1A	Hif1a	ENSG00000100644.12	14	62162231	62214976	83.0641	0.410002	171.533	2573	52745	15	0	59086	0	4	0	0	0.902821	0.901965	1.00058	-0.0349757	0.386868	0	DAZL.target
HIPK3	Hipk3	ENSG00000110422.7	11	33278218	33378569	90.4847	0.436525	234	3744	100351	16	0	58990	1	41	0	24	0.939872	-2.87279	0.482351	-2.53125	-2.47163	0	DAZL.target
HIRA	Hira	ENSG00000100084.10	22	19318221	19435224	76.7913	0.543799	140.962	3665	117003	26	1	58839	13	34	0	0	1.40855	1.51161	-2.51548	-2.53125	-2.47163	1	DAZL.target
HIST3H2A	Hist3h2a	ENSG00000181218.4	1	228645065	228645560	70.4355	0.6775	399	399	495	1	0	58903	0	1	0	0	-0.0235509	-0.00897342	0.346097	0.309374	0.446509	0	DAZL.target
HJURP	Hjurp	ENSG00000123485.7	2	234742062	234763212	72.2862	0.529112	255.667	2301	21150	9	0	58984	3	3	2	1	-1.46849	-0.50685	-0.903621	-0.129878	-0.451273	0	DAZL.target
HMG20A	Hmg20a	ENSG00000140382.10	15	77712754	77777949	69.9418	0.475045	137.5	1100	65195	8	2	59149	2	2	2	2	-1.09758	-0.774868	0.290854	0.878619	0.69114	0	DAZL.target
HMGXB4	Hmgxb4	ENSG00000100281.9	22	35653445	35691800	82.8518	0.458068	171.455	1886	38355	11	1	58962	0	1	0	0	0.729147	0.755699	1.12128	0.976188	1.24408	0	DAZL.target
HMOX1	Hmox1	ENSG00000100292.12	22	35776354	35790207	84.0392	0.61198	179.4	897	13853	5	1	58991	5	3	4	1	-2.59318	-0.356009	-1.18587	0.218807	-0.381562	1	DAZL.target
HNRNPF	Hnrnpf	ENSG00000169813.12	10	43881065	43904614	100.061	0.543426	1254	1254	23549	1	1	58704	0	1	0	0	-0.00187681	0.0240833	0.679698	0.487652	0.679714	0	DAZL.target
HNRNPL	Hnrnpl	ENSG00000104824.12	19	39327028	39342987	81.2854	0.529046	134.5	1614	15959	12	0	59060	0	0	0	0	0.588367	0.621612	0.769674	1.07644	1.23901	0	DAZL.target
HNRNPLL	Hnrnpll	ENSG00000143889.11	2	38789120	38830728	63.6234	0.426447	126.357	1769	41608	14	0	59031	1	44	1	40	-0.269856	-2.87279	0.235449	-2.53125	-2.47163	0	DAZL.target
HNRNPM	Hnrnpm	ENSG00000099783.7	19	8509651	8553998	108.338	0.472246	147.667	2215	44347	15	0	59007	0	6	0	1	1.10372	0.265125	1.23101	-0.275597	0.24211	0	DAZL.target
HNRNPR	Hnrnpr	ENSG00000125944.14	1	23630264	23670829	101.52	0.443828	196.9	1969	40565	10	0	59074	0	0	0	0	0.759133	0.710449	0.987195	1.18704	1.41576	0	DAZL.target
HNRNPU	Hnrnpu	ENSG00000153187.12	1	245014468	245027844	100.221	0.439914	187.786	2629	13376	14	0	58920	0	8	0	7	0.946774	-2.87279	1.10692	-0.76005	-0.19754	0	DAZL.target
HOOK1	Hook1	ENSG00000134709.6	1	60280458	60342050	73.8865	0.386057	103.65	2073	61592	20	0	58990	1	1	1	0	0.293895	1.23968	0.637391	0.96498	1.00652	0	DAZL.target
HP1BP3	Hp1bp3	ENSG00000127483.13	1	21069154	21113816	84.8959	0.463142	144.5	1734	44662	12	0	59163	0	6	0	4	0.685576	-1.8737	0.854488	-0.563764	-0.112418	0	DAZL.target
HSBP1	Hsbp1	ENSG00000230989.2	16	83841448	83853342	32.0834	0.448929	96	192	11894	2	0	58615	1	1	0	0	-0.404475	-0.247974	-0.472597	0.149051	-0.0427019	0	DAZL.target
HSD17B7	Hsd17b7	ENSG00000132196.9	1	162760492	162782607	58.494	0.450995	121.556	1094	22115	9	0	58891	1	0	1	0	-0.65171	0.351761	-0.0202709	0.861313	0.66782	0	DAZL.target
HSF5	Hsf5	ENSG00000176160.5	17	56497528	56565745	92.2551	0.523524	314.833	1889	68217	6	0	59071	0	0	0	0	0.297143	0.312244	0.609291	0.902975	1.05021	0	DAZL.target
HSP90AA1	Hsp90aa1	ENSG00000080824.14	14	102547075	102606036	88.2688	0.460544	203.8	2038	58961	10	0	59030	2	16	1	13	-0.331548	-2.87279	-0.202642	-2.08921	-1.59573	0	DAZL.target
HSP90B1	Hsp90b1	ENSG00000166598.8	12	104323885	104347423	64.1396	0.432414	132.474	2517	23538	19	0	58926	0	4	0	4	0.8654	-1.66284	0.913247	-0.0616335	0.323112	0	DAZL.target
HSPA14	Hspa14	ENSG00000187522.9	10	14880163	14913740	72.44	0.411133	110.667	1660	33577	15	0	59033	0	0	0	0	0.838573	0.877121	0.933684	1.16461	1.3773	0	DAZL.target
HSPH1	Hsph1	ENSG00000120694.15	13	31710762	31736525	92.4461	0.424883	145.55	2911	25763	20	0	58976	10	16	6	0	-2.84472	1.20389	-2.13437	-1.72161	-1.73352	0	DAZL.target
HYOU1	Hyou1	ENSG00000149428.14	11	118914900	118927913	95.3875	0.546578	122.407	3305	13013	27	0	58942	1	7	1	4	0.582559	-1.10321	0.857164	-0.280295	0.111641	0	DAZL.target
IAH1	Iah1	ENSG00000134330.14	2	9613787	9636672	63.6679	0.513054	131.429	920	22885	7	0	59002	0	3	0	0	0.129697	0.223149	0.424986	-0.178778	0.0720366	0	DAZL.target
ICMT	Icmt	ENSG00000116237.11	1	6281253	6296032	79.0464	0.484493	150.8	754	14779	5	0	59119	0	0	0	0	0.188519	0.229356	0.522954	0.853666	0.986011	0	DAZL.target
IDE	Ide	ENSG00000119912.11	10	94211441	94333833	98.0121	0.410788	129.417	3106	122392	24	0	59264	2	5	1	5	0.692731	-1.46361	0.489824	0.122678	0.316706	0	DAZL.target
IDH1	Idh1	ENSG00000138413.9	2	209100951	209130798	89.4993	0.438601	161.625	1293	29847	8	0	59171	3	1	3	0	-1.83984	0.537209	-0.598793	0.671943	0.194829	0	DAZL.target
IGF1R	Igf1r	ENSG00000140443.9	15	99192200	99507759	86.9378	0.539692	205.524	4316	315559	21	1	59092	1	6	0	3	1.35244	-0.58755	0.867202	-0.0841175	0.249932	1	DAZL.target
IGSF11	Igsf11	ENSG00000144847.8	3	118619404	118864915	89.1062	0.501628	173.75	1390	245511	8	0	58990	0	9	0	9	0.581986	-2.87279	0.728242	-1.22731	-0.714223	0	DAZL.target
IGSF3	Igsf3	ENSG00000143061.13	1	117117031	117210375	65.0358	0.580994	374.7	3747	93344	10	0	58788	1	0	0	0	0.178608	0.258149	-0.134915	0.780477	0.550632	0	DAZL.target
IGSF8	Igsf8	ENSG00000162729.9	1	160061130	160068733	61.3728	0.629865	361.6	1808	7603	5	0	58876	0	1	0	0	-0.0531042	-0.004843	0.287818	0.301696	0.423784	0	DAZL.target
ILF3	Ilf3	ENSG00000129351.13	19	10764937	10803093	81.1755	0.533755	141.174	3247	38156	23	0	58817	0	6	0	2	1.13402	-0.285943	1.09568	-0.325537	0.140379	0	DAZL.target
ILK	Ilk	ENSG00000166333.9	11	6624961	6632102	110.637	0.529233	138.091	1519	7141	11	0	58961	2	5	0	0	0.876089	0.804518	0.103697	-0.15544	-0.0430276	0	DAZL.target
IMP3	Imp3	ENSG00000177971.7	15	75931426	75941047	48.3637	0.651246	561	561	9621	1	5	58896	0	2	0	0	0.330208	0.363511	2.13979	1.84766	1.94861	0	DAZL.target
IMP4	Imp4	ENSG00000136718.5	2	131099798	131105383	63.1321	0.551405	100.6	1006	5585	10	5	58724	21	77	1	1	0.109378	0.25199	-2.56757	-2.53125	-2.47163	1	DAZL.target
INPP4A	Inpp4a	ENSG00000040933.11	2	99061317	99210853	42.5257	0.5255	123.385	3208	149536	26	0	58861	1	0	0	0	0.947665	1.15881	0.307286	1.18963	1.00707	0	DAZL.target
INPP5A	Inpp5a	ENSG00000068383.14	10	134351324	134596979	93.5873	0.517603	93	1395	245655	15	1	59036	4	19	0	6	1.22284	-2.17858	-0.368443	-1.87232	-1.39662	1	DAZL.target
INPP5F	Inpp5f	ENSG00000198825.7	10	121485609	121588652	74.4911	0.419291	176.05	3521	103043	20	0	59030	1	1	0	0	1.04869	1.10172	0.497447	0.876097	0.884745	0	DAZL.target
INPPL1	Inppl1	ENSG00000165458.9	11	71934745	71950149	75.2301	0.577822	147.615	3838	15404	26	0	59023	0	1	0	0	1.20315	1.24625	1.11442	1.01981	1.27413	0	DAZL.target
INTS7	Ints7	ENSG00000143493.8	1	212113741	212208884	78.6617	0.428493	150.45	3009	95143	20	0	59135	2	6	0	0	1.10066	1.14999	0.0873931	-0.384812	-0.208544	0	DAZL.target
IPMK	Ipmk	ENSG00000151151.5	10	59951278	60027694	69.8578	0.444827	214.5	1287	76416	6	0	59000	0	0	0	0	0.191408	0.2703	0.483208	0.79981	0.932024	0	DAZL.target
IPO5	Ipo5	ENSG00000065150.14	13	98605912	98676551	79.6914	0.431455	132.519	3578	70639	27	0	59078	0	1	0	1	1.43355	0.699077	1.29967	1.11	1.42755	0	DAZL.target
IRF2BP2	Irf2bp2	ENSG00000168264.6	1	234740015	234745271	63.5739	0.659907	888	1776	5256	2	0	58647	0	0	0	0	-0.284033	-0.239078	0.132646	0.472653	0.5158	0	DAZL.target
IRF6	Irf6	ENSG00000117595.6	1	209959036	209979465	86.0901	0.534332	206.571	1446	20429	7	0	58953	0	1	0	0	0.319776	0.336147	0.615376	0.558308	0.757645	0	DAZL.target
ISG20L2	Isg20l2	ENSG00000143319.12	1	156691683	156698591	131.253	0.530017	360	1080	6908	3	0	58879	0	0	0	0	0.584077	0.438316	1.05149	1.22098	1.4452	0	DAZL.target
IST1	Ist1	ENSG00000182149.16	16	71879899	71962913	88.1814	0.461114	138	1242	83014	9	0	58915	1	5	0	3	0.594171	-1.42877	0.265104	-0.414283	-0.177602	0	DAZL.target
ITFG1	Itfg1	ENSG00000129636.8	16	47188298	47498060	71.0207	0.420739	105.684	2008	309762	19	0	58853	2	8	0	0	1.18701	1.34141	0.0535075	-0.814538	-0.539364	0	DAZL.target
ITGA6	Itga6	ENSG00000091409.10	2	173292082	173371181	100.128	0.441099	135.444	3657	79099	27	0	58995	2	1	2	1	-0.043687	0.858663	0.526617	1.27593	1.12038	0	DAZL.target
ITGB1	Itgb1	ENSG00000150093.14	10	33189247	33294720	97.3907	0.399753	163.312	2613	105473	16	0	59085	1	7	0	7	1.18831	-2.74905	0.700144	-0.505166	-0.0890497	0	DAZL.target
ITM2B	Itm2b	ENSG00000136156.8	13	48807294	48837063	76.2048	0.440093	139.667	838	29769	6	0	59054	6	1	0	1	0.294904	-0.44639	-1.8027	0.515663	-0.540274	0	DAZL.target
ITM2C	Itm2c	ENSG00000135916.11	2	231729354	231743963	86.8774	0.591845	142.8	714	14609	5	0	59040	1	3	0	2	0.299747	-1.15091	0.0712837	-0.0499595	0.0180479	0	DAZL.target
ITPA	Itpa	ENSG00000125877.8	20	3189514	3204516	81.8313	0.558947	79.125	633	15002	8	0	58957	0	3	0	0	0.431402	0.470985	0.672836	0.017501	0.31186	0	DAZL.target
IVNS1ABP	Ivns1abp	ENSG00000116679.11	1	185265520	185286461	89.3157	0.414962	160.077	2081	20941	13	0	59154	3	1	2	0	-0.837653	0.825065	-0.391999	0.83273	0.394747	0	DAZL.target
JAG1	Jag1	ENSG00000101384.7	20	10618332	10654694	92.3489	0.528029	149.04	3726	36362	25	0	58870	0	4	0	3	1.34174	-0.711904	1.27327	0.253111	0.684028	0	DAZL.target
JAK1	Jak1	ENSG00000162434.7	1	65298912	65432187	85.0356	0.47317	150.375	3609	133275	24	0	59156	0	1	0	1	1.3039	0.589715	1.20011	1.03717	1.33404	0	DAZL.target
JAM3	Jam3	ENSG00000166086.8	11	133938820	134021896	79.4807	0.515084	124.667	1122	83076	9	0	58581	6	7	1	2	-0.460255	-0.936312	-1.74746	-0.905951	-1.24429	0	DAZL.target
JMJD1C	Jmjd1c	ENSG00000171988.13	10	64926981	65225722	86.8639	0.405641	312.154	8116	298741	26	0	58964	1	1	0	1	1.51691	0.801519	0.735135	1.07687	1.12497	0	DAZL.target
JOSD1	Josd1	ENSG00000100221.6	22	39081548	39097561	92.1893	0.509023	158.5	634	16013	4	0	59127	1	1	0	0	0.261508	0.266438	0.0836422	0.54911	0.481772	0	DAZL.target
KANSL2	Kansl2	ENSG00000139620.8	12	49047184	49076021	51.3215	0.501242	206.9	2069	28837	10	0	58778	0	0	0	0	0.108033	0.220358	0.377621	0.776358	0.860453	0	DAZL.target
KAT6B	Kat6b	ENSG00000156650.8	10	76585340	76792380	93.2185	0.437322	436.385	5673	207040	13	0	59016	0	4	0	0	0.74021	0.754829	0.844959	-0.170662	0.224684	0	DAZL.target
KAT7	Kat7	ENSG00000136504.7	17	47865917	47906458	82.8538	0.466657	128.4	1926	40541	15	0	59008	0	2	0	0	0.828029	0.860463	0.93591	0.489606	0.799939	0	DAZL.target
KAZN	Kazn	ENSG00000189337.11	1	14925200	15444539	51.4062	0.612555	160.538	2087	519339	13	0	58915	0	5	0	3	0.714933	-1.12336	0.596399	-0.567361	-0.22213	0	DAZL.target
KCNAB3	Kcnab3	ENSG00000170049.5	17	7825177	7833121	119.069	0.548436	97.0714	1359	7944	14	0	58831	6	15	0	0	1.19009	1.09511	-1.04918	-1.51324	-1.29415	0	DAZL.target
KCTD10	Kctd10	ENSG00000110906.8	12	109886461	109915349	69.9121	0.480764	151.571	1061	28888	7	0	58897	0	0	0	0	0.209687	0.281068	0.500127	0.84481	0.968513	0	DAZL.target
KCTD18	Kctd18	ENSG00000155729.8	2	201353675	201384507	80.3093	0.471209	226.5	1359	30832	6	0	58932	0	1	0	0	0.23224	0.265587	0.550264	0.484832	0.684435	0	DAZL.target
KDM1A	Kdm1a	ENSG00000004487.11	1	23345941	23410182	76.3085	0.45297	121.7	2434	64241	20	0	58873	0	1	0	0	1.04591	1.10873	1.04327	0.904951	1.17966	0	DAZL.target
KDM5A	Kdm5a	ENSG00000073614.7	12	389295	498620	106.61	0.463692	180.6	5418	109325	30	0	59004	8	31	6	5	-2.29686	-1.30854	-1.32284	-2.53125	-2.06956	0	DAZL.target
KDM5B	Kdm5b	ENSG00000117139.12	1	202696526	202778598	94.2344	0.467062	177.667	4797	82072	27	0	59056	1	2	0	1	1.4855	0.710949	0.831083	0.852306	0.984918	0	DAZL.target
KHDRBS1	Khdrbs1	ENSG00000121774.13	1	32479430	32526451	92.2062	0.477588	124.75	998	47021	8	0	59045	0	1	0	1	0.554016	-0.215617	0.80111	0.690743	0.933835	0	DAZL.target
KIAA0355	4931406P16Rik	ENSG00000166398.8	19	34745442	34846491	91.4036	0.552813	253.462	3295	101049	13	0	58928	1	2	0	0	0.696555	0.713362	0.299243	0.412954	0.454971	0	DAZL.target
KIAA0895L	4931428F04Rik	ENSG00000196123.8	16	67209505	67217943	77.5439	0.601895	228	1140	8438	5	0	59038	0	0	0	0	0.15137	0.175846	0.472827	0.826752	0.932621	0	DAZL.target
KIAA0930	5031439G07Rik	ENSG00000100364.14	22	45586219	45636650	83.1962	0.593984	148	1332	50431	9	0	59134	0	2	0	1	0.498967	-0.250347	0.701477	0.318855	0.571985	0	DAZL.target
KIAA1211L	2010300C02Rik	ENSG00000196872.6	2	99410309	99552722	101.441	0.567585	327.889	2951	142413	9	0	59109	1	0	1	0	-0.309416	0.597033	0.273875	1.06247	0.922538	0	DAZL.target
KIAA2013	2510039O18Rik	ENSG00000116685.11	1	11979648	11986485	72.4183	0.61701	679.667	2039	6837	3	0	58940	1	1	1	0	-1.09791	-0.154184	-0.311789	0.199102	0.0466318	0	DAZL.target
KIDINS220	Kidins220	ENSG00000134313.10	2	8865408	8977760	97.8448	0.447408	185.867	5576	112352	30	0	59136	6	16	6	13	-2.37481	-2.87279	-0.885589	-1.47748	-1.19377	0	DAZL.target
KIF11	Kif11	ENSG00000138160.4	10	94353043	94415150	76.3219	0.385494	150.136	3303	62107	22	0	58915	1	4	1	1	0.352907	0.492936	0.674163	0.131885	0.392196	0	DAZL.target
KIF1C	Kif1c	ENSG00000129250.7	17	4901243	4931696	82.4273	0.568412	163.714	3438	30453	21	1	59097	1	1	0	0	1.17868	1.20706	0.835633	1.23302	1.238	0	DAZL.target
KIF2C	Kif2c	ENSG00000142945.8	1	45205490	45233439	94.1743	0.505016	109.636	2412	27949	22	0	58826	3	7	3	3	-1.11031	-0.769724	-0.14224	-0.405899	-0.29475	0	DAZL.target
KIN	Kin	ENSG00000151657.7	10	7792925	7829990	87.8464	0.411922	101.923	1325	37065	13	0	59043	2	2	1	0	0.00798201	0.912888	0.0467311	0.536249	0.426425	0	DAZL.target
KLF11	Klf11	ENSG00000172059.6	2	10182976	10194963	85.8685	0.552601	505	1515	11987	3	0	58872	0	6	0	0	-0.0335386	-0.0154412	0.382196	-0.975634	-0.613799	0	DAZL.target
KLHL11	Klhl11	ENSG00000178502.5	17	40009797	40021684	68.4187	0.560577	1069.5	2139	11887	2	0	58532	0	0	0	0	-0.455733	-0.371803	0.0233505	0.371527	0.407636	0	DAZL.target
KLHL12	Klhl12	ENSG00000117153.11	1	202860228	202897764	124.457	0.48476	165.091	1816	37536	11	0	58989	1	3	0	0	1.06542	0.947736	0.775154	0.468643	0.677456	0	DAZL.target
KLHL21	Klhl21	ENSG00000162413.12	1	6650784	6674667	46.403	0.597661	303.333	910	23883	3	0	58929	0	4	0	0	-0.320785	-0.194134	0.0879202	-0.702735	-0.492316	0	DAZL.target
KMT2D	Kmt2d	ENSG00000167548.10	12	49412758	49453557	67.5187	0.574744	310.667	16776	40799	54	1	58965	2	3	1	2	1.57818	1.38795	0.934218	1.42258	1.33802	1	DAZL.target
KNOP1	Knop1	ENSG00000103550.9	16	19714902	19729557	117.365	0.539179	368.75	1475	14655	4	0	58975	2	2	0	1	0.450389	-0.427565	-0.134126	0.383419	0.225584	0	DAZL.target
KPNA3	Kpna3	ENSG00000102753.5	13	50273447	50367057	77.2543	0.414479	98.1176	1668	93610	17	0	59033	13	4	0	2	1.03786	-0.360599	-2.62354	0.0174749	-1.25751	0	DAZL.target
KPNB1	Kpnb1	ENSG00000108424.5	17	45726842	45762871	92.2021	0.474904	131.238	2756	36029	21	0	58931	0	0	0	0	1.21518	1.21789	1.21534	1.4196	1.66566	0	DAZL.target
KRAS	Kras	ENSG00000133703.7	12	25357723	25403870	67.7038	0.37056	143.4	717	46147	5	0	58865	1	5	0	2	0.340198	-1.09389	0.0889959	-0.602982	-0.376349	0	DAZL.target
KRR1	Krr1	ENSG00000111615.8	12	75890684	75905416	79.8725	0.395007	117.75	1413	14732	12	0	58994	0	272	0	0	0.789233	0.782298	0.945298	-2.53125	-2.47163	0	DAZL.target
LAMP1	Lamp1	ENSG00000185896.9	13	113951556	113977987	98.8306	0.543516	155.125	1241	26431	8	0	58985	1	2	0	0	0.567244	0.547986	0.295808	0.403433	0.449033	0	DAZL.target
LAMTOR1	Lamtor1	ENSG00000149357.5	11	71796941	71814433	66.6026	0.573785	111.6	558	17492	5	0	58976	0	34	0	0	0.0732799	0.15325	0.390472	-2.53125	-2.47163	0	DAZL.target
LAPTM4A	Laptm4a	ENSG00000068697.6	2	20232411	20251789	73.8367	0.44141	109	763	19378	7	0	59085	2	3	2	0	-1.35507	0.385457	-0.379604	-0.0646562	-0.168771	0	DAZL.target
LARP4B	Larp4b	ENSG00000107929.10	10	855484	977564	75.562	0.485098	148.882	2531	122080	17	0	59040	0	2	0	0	0.848161	0.940916	0.882542	0.457771	0.75087	0	DAZL.target
LBR	Lbr	ENSG00000143815.10	1	225589204	225616627	100.36	0.427515	151.538	1970	27423	13	0	58898	1	4	0	1	0.969073	0.129762	0.591752	0.0589714	0.30878	0	DAZL.target
LDB1	Ldb1	ENSG00000198728.6	10	103867317	103880210	85.5311	0.555647	132.1	1321	12893	10	0	59052	0	3	0	2	0.536797	-0.904929	0.752145	0.0762434	0.38602	0	DAZL.target
LEMD3	Lemd3	ENSG00000174106.2	12	65563351	65642107	81.3358	0.396225	216.462	2814	78756	13	0	58999	0	2	0	0	0.792073	0.792582	0.919345	0.421642	0.753283	0	DAZL.target
LGMN	Lgmn	ENSG00000100600.10	14	93170152	93215047	101.514	0.517616	117.929	1651	44895	14	0	59047	3	3	2	0	-0.728222	0.952535	-0.306651	0.334696	0.123125	0	DAZL.target
LIG3	Lig3	ENSG00000005156.7	17	33307513	33332083	78.4798	0.514179	154.667	3248	24570	21	1	58993	0	0	0	0	1.12981	1.17491	1.33658	1.57503	1.79731	0	DAZL.target
LIMA1	Lima1	ENSG00000050405.9	12	50569571	50677329	111.423	0.465914	223.273	2456	107758	11	1	58809	1	1	1	1	0.139906	0.223323	0.90277	1.19925	1.25377	0	DAZL.target
LIN28A	Lin28a	ENSG00000131914.6	1	26737269	26756213	74.6785	0.591111	163.5	654	18944	4	0	59145	1	0	0	0	0.0934227	0.143441	-0.107843	0.79735	0.57741	0	DAZL.target
LIN7C	Lin7c	ENSG00000148943.7	11	27516123	27528320	97.1206	0.479704	124.8	624	12197	5	0	59019	0	3	0	0	0.418809	0.400268	0.752048	0.0374447	0.367717	0	DAZL.target
LIN9	Lin9	ENSG00000183814.11	1	226418850	226497570	72.091	0.388142	120.429	1686	78720	14	0	59177	1	27	0	1	0.862623	0.125176	0.411362	-2.53125	-2.165	0	DAZL.target
LIPA	Lipa	ENSG00000107798.13	10	90973326	91174314	110.245	0.433737	141.444	1273	200988	9	0	58932	0	1	0	0	0.980092	0.974821	1.13192	0.898954	1.21696	0	DAZL.target
LLGL1	Llgl1	ENSG00000131899.6	17	18128901	18148189	65.3033	0.614484	154.286	3240	19288	21	2	58887	1	6	0	0	1.20468	1.25553	1.1024	0.233259	0.514733	1	DAZL.target
LMAN1	Lman1	ENSG00000074695.5	18	56995055	57027194	82.7759	0.423806	126.308	1642	32139	13	0	59107	2	2	2	0	-0.893915	0.810252	-0.0543574	0.467237	0.334943	0	DAZL.target
LNX2	Lnx2	ENSG00000139517.6	13	28120050	28194541	92.6041	0.480376	236.333	2127	74491	9	0	58909	0	1	0	0	0.534405	0.54275	0.771967	0.657015	0.896633	0	DAZL.target
LPAR2	Lpar2	ENSG00000064547.9	19	19734477	19739739	75.6483	0.616822	534	1068	5262	2	0	58819	0	0	0	0	-0.126301	-0.0909045	0.283561	0.631281	0.705971	0	DAZL.target
LPCAT3	Lpcat3	ENSG00000111684.6	12	7085348	7125814	93.7547	0.498145	128	1536	40466	12	0	59103	0	1	0	0	0.765204	0.770715	0.935805	0.812535	1.07193	0	DAZL.target
LPIN2	Lpin2	ENSG00000101577.5	18	2916992	3013313	81.738	0.481401	145.85	2917	96321	20	0	58937	5	10	1	2	0.144078	-0.343644	-1.05374	-1.08825	-1.06378	0	DAZL.target
LRRC40	Lrrc40	ENSG00000066557.5	1	70610488	70671303	62.4394	0.373653	126.6	1899	60815	15	0	59066	0	2	0	1	0.838786	0.104785	0.914733	0.427961	0.752284	0	DAZL.target
LRRC42	Lrrc42	ENSG00000116212.10	1	54411750	54433841	81.2157	0.481043	189.857	1329	22091	7	0	59118	2	0	1	0	-0.604701	0.333129	-0.395479	0.910132	0.466848	0	DAZL.target
LRRC47	Lrrc47	ENSG00000130764.5	1	3696784	3713068	60.6934	0.55439	195.5	1173	16284	6	0	59037	0	5	0	0	-0.00408527	0.0869731	0.324268	-0.740247	-0.439676	0	DAZL.target
LRRC58	Lrrc58	ENSG00000163428.3	3	120043356	120068186	68.1546	0.406009	208.333	625	24830	3	0	58991	0	1	0	0	0.0760437	0.12214	0.44443	0.369585	0.563527	0	DAZL.target
LSM14A	Lsm14a	ENSG00000257103.4	19	34663409	34720420	75.4821	0.458378	145.2	1452	57011	10	0	59017	0	6	0	6	0.486111	-2.87279	0.690729	-0.696025	-0.273931	0	DAZL.target
LSM14B	Lsm14b	ENSG00000149657.15	20	60697517	60710434	41.9179	0.551996	153.8	1538	12917	10	0	58924	0	3	0	0	0.0452932	0.180511	0.322887	-0.224335	-0.0167405	0	DAZL.target
LSM4	Lsm4	ENSG00000130520.6	19	18417040	18434084	49.4811	0.577531	83.25	333	17044	4	0	58791	1	1	0	0	-0.147334	-0.020635	-0.323851	0.288401	0.113724	0	DAZL.target
LUC7L3	Luc7l3	ENSG00000108848.11	17	48796905	48833574	65.545	0.418061	128.6	1286	36669	10	0	58968	0	1	0	0	0.461357	0.522687	0.670128	0.581113	0.804123	0	DAZL.target
LYPLA2	Lypla2	ENSG00000011009.6	1	24117460	24122029	93.7734	0.558963	91.1111	820	4569	9	0	59067	0	1	0	1	0.612061	-0.177245	0.842584	0.753929	0.987462	0	DAZL.target
LZTS2	Lzts2	ENSG00000107816.13	10	102756375	102767593	63.4232	0.664476	508.5	2034	11218	4	0	58846	0	1	0	0	-0.0603218	-0.0381082	0.28548	0.268882	0.393006	0	DAZL.target
M6PR	M6pr	ENSG00000003056.3	12	9092959	9102551	90.3068	0.489296	130.571	914	9592	7	0	59004	1	1	0	0	0.437721	0.439905	0.193353	0.640104	0.593257	0	DAZL.target
MAP3K12	Map3k12	ENSG00000139625.8	12	53874274	53893847	101.343	0.561203	212.846	2767	19573	13	0	59059	0	0	0	0	0.809531	0.757308	0.987652	1.23655	1.43875	0	DAZL.target
MAP4K3	Map4k3	ENSG00000011566.10	2	39476407	39664453	73.8476	0.398494	85.8529	2919	188046	34	0	58968	0	17	0	2	1.89234	0.559627	1.55121	-1.58741	-0.786152	0	DAZL.target
MAP4K4	Map4k4	ENSG00000071054.11	2	102313312	102511149	57.027	0.494812	128.906	4125	197837	32	0	58793	3	3	3	3	-1.01094	-0.479687	-0.279157	0.413041	0.169942	0	DAZL.target
MAPK6	Mapk6	ENSG00000069956.7	15	52244303	52358462	82.7215	0.404091	439.2	2196	114159	5	0	59173	0	6	0	2	0.271033	-1.16103	0.576041	-0.8724	-0.4434	0	DAZL.target
MAPK8	Mapk8	ENSG00000107643.11	10	49514698	49647403	78.9465	0.421527	113.615	1477	132705	13	0	59034	9	8	0	0	0.835657	0.907072	-2.24621	-0.913483	-1.3964	0	DAZL.target
MAPRE1	Mapre1	ENSG00000101367.8	20	31407699	31438211	121.58	0.479333	140.5	843	30512	6	0	58908	12	0	0	0	0.778959	0.678105	-2.62354	1.29322	-0.714205	0	DAZL.target
MARCH5	March5	ENSG00000198060.5	10	94050920	94113721	117.518	0.416922	166.4	832	62801	5	0	59020	0	1	0	1	0.784642	-0.0943692	1.10889	0.870784	1.18955	0	DAZL.target
MARCH7	March7	ENSG00000136536.10	2	160569000	160627538	85.2122	0.397216	241.889	2177	58538	9	0	59115	1	8	0	0	0.600671	0.584006	0.289736	-1.01871	-0.632296	0	DAZL.target
MARCH8	March8	ENSG00000165406.11	10	45950035	46090354	72.3666	0.501479	251.571	1761	140319	7	0	59091	1	2	0	1	0.212992	-0.459405	-0.0741645	0.0984037	0.0816827	0	DAZL.target
MARCKSL1	Marcksl1	ENSG00000175130.6	1	32799433	32801980	53.6346	0.669773	300	600	2547	2	0	58893	0	0	0	0	-0.14447	-0.0859218	0.225981	0.625068	0.671347	0	DAZL.target
MARK1	Mark1	ENSG00000116141.11	1	220701568	220837803	73.2301	0.42927	139.278	2507	136235	18	0	58928	2	0	1	0	0.0698446	1.06812	-0.0213408	1.20489	0.827053	0	DAZL.target
MARK2	Mark2	ENSG00000072518.16	11	63606400	63678491	103.953	0.529986	123.667	2597	72091	21	0	58990	3	3	2	2	-0.344029	-0.117043	-0.0681164	0.536595	0.357717	0	DAZL.target
MARK3	Mark3	ENSG00000075413.13	14	103851729	103970168	72.2459	0.414111	139.444	2510	118439	18	0	58862	4	4	3	1	-1.39945	0.283493	-0.775252	-0.0291572	-0.305305	0	DAZL.target
MBD2	Mbd2	ENSG00000134046.7	18	51679079	51751158	115.533	0.427399	144.8	724	72079	5	0	59022	0	2	0	0	0.753871	0.677617	1.06909	0.525093	0.883431	0	DAZL.target
MBNL2	Mbnl2	ENSG00000139793.14	13	97873688	98046374	95.0855	0.489184	158.222	1424	172686	9	0	59020	0	0	0	0	0.679605	0.735035	0.845541	1.08816	1.28192	0	DAZL.target
MBOAT7	Mboat7	ENSG00000125505.12	19	54677107	54693733	50.8572	0.609198	186.167	1117	16626	6	0	58229	0	0	0	0	-0.0405611	0.0597977	0.276991	0.703877	0.756646	0	DAZL.target
MBTD1	Mbtd1	ENSG00000011258.11	17	49254786	49337524	66.8949	0.416315	132.8	1992	82738	15	0	59070	0	1	0	1	0.766902	0.0607847	0.848977	0.725936	0.97797	0	DAZL.target
MCAM	Mcam	ENSG00000076706.10	11	119179241	119192231	87.1452	0.583153	133.5	1869	12990	14	0	59065	0	1	0	0	0.789261	0.79211	0.913624	0.821717	1.05987	0	DAZL.target
MCMBP	Mcmbp	ENSG00000197771.8	10	121588972	121652068	87.0517	0.433314	135.533	2033	63096	15	0	59028	3	1	2	0	-0.756597	0.954068	-0.373958	0.863616	0.42006	0	DAZL.target
MDM2	Mdm2	ENSG00000135679.17	12	69201956	69239214	106.847	0.417235	147.091	1618	37258	11	0	58769	1	11	1	2	0.0642316	-0.563427	0.635361	-1.2071	-0.66773	0	DAZL.target
MDM4	Mdm4	ENSG00000198625.8	1	204485511	204542871	87.5966	0.42367	146.727	1614	57360	11	0	59083	0	2	0	0	0.744025	0.748202	0.916436	0.435396	0.76001	0	DAZL.target
MED13L	Med13l	ENSG00000123066.3	12	116395711	116715143	88.641	0.489928	222.742	6905	319432	31	0	58928	1	7	1	7	0.765921	-2.12394	0.817627	-0.319239	0.0709591	0	DAZL.target
MED21	Med21	ENSG00000152944.4	12	27175479	27219276	93.1974	0.462929	169	676	43797	4	0	59003	1	0	0	0	0.328078	0.333841	0.134322	0.940939	0.792773	0	DAZL.target
MED24	Med24	ENSG00000008838.13	17	38175350	38217468	72.2263	0.557259	134.16	3354	42118	25	0	58956	1	5	1	2	0.232535	-0.242992	0.528129	-0.122225	0.116528	0	DAZL.target
MED31	Med31	ENSG00000108590.6	17	6546635	6554954	80.381	0.440301	105	420	8319	4	1	58919	0	1	0	0	0.376382	0.403488	0.913261	0.799944	1.03793	0	DAZL.target
MEN1	Men1	ENSG00000133895.10	11	64570982	64578766	83.6834	0.610169	211.333	1902	7784	9	0	58856	0	2	0	0	0.452708	0.443846	0.684644	0.29957	0.549814	0	DAZL.target
METAP2	Metap2	ENSG00000111142.9	12	95867296	95909615	84.1696	0.413873	144	1440	42319	10	1	59051	0	2	0	1	0.80999	0.035922	1.19959	0.686399	1.03106	0	DAZL.target
METTL8	Mettl8	ENSG00000123600.14	2	172173919	172291312	39.6683	0.41504	144.889	1304	117393	9	0	59045	0	0	0	0	0.178735	0.341444	0.415382	0.768661	0.872061	0	DAZL.target
MEX3D	Mex3d	ENSG00000181588.15	19	1554668	1568057	38.1708	0.704029	713	1426	13389	2	0	58631	0	0	0	0	-0.337759	-0.264172	0.0689212	0.451637	0.461722	0	DAZL.target
MGME1	Mgme1	ENSG00000125871.9	20	17949556	17971765	75.7967	0.433917	283.5	1134	22209	4	0	59293	0	8	0	0	0.104901	0.136893	0.47098	-1.27505	-0.823195	0	DAZL.target
MICAL3	Mical3	ENSG00000243156.3	22	18270415	18507325	55.1173	0.560794	193.829	6784	236910	35	0	59076	10	19	9	15	-2.84641	-2.87279	-2.28644	-2.02655	-2.01263	0	DAZL.target
MIDN	Midn	ENSG00000167470.8	19	1248552	1259142	46.8113	0.66088	201.667	1210	10590	6	0	59069	1	2	0	1	0.0206426	-0.688171	-0.219692	0.0279377	-0.052184	0	DAZL.target
MIER1	Mier1	ENSG00000198160.10	1	67390578	67454302	73.9582	0.394084	114.6	1719	63724	15	0	59012	2	0	0	0	0.915438	0.952022	-0.0109775	1.1887	0.825889	0	DAZL.target
MIF4GD	Mif4gd	ENSG00000125457.9	17	73262309	73267308	102.139	0.556367	152	912	4999	6	0	58830	2	4	0	0	0.492584	0.451795	-0.191642	-0.159947	-0.167256	0	DAZL.target
MINPP1	Minpp1	ENSG00000107789.11	10	89264632	89313217	62.5248	0.416893	255.167	1531	48585	6	0	58417	1	3	1	2	-0.789028	-1.27592	-0.0958772	-0.236021	-0.171315	0	DAZL.target
MIS18A	Mis18a	ENSG00000159055.3	21	33640530	33651380	48.4256	0.46122	146.4	732	10850	5	0	59063	0	3	0	0	-0.111465	0.00575331	0.26077	-0.316948	-0.0936339	0	DAZL.target
MIS18BP1	Mis18bp1	ENSG00000129534.9	14	45672393	45722743	76.8643	0.35475	218.438	3495	50350	16	0	59069	2	4	1	1	0.100014	0.188311	0.0747997	-0.0167016	0.0609819	0	DAZL.target
MKNK2	Mknk2	ENSG00000099875.10	19	2037470	2051243	49.7384	0.613452	122.077	1587	13773	13	0	58881	0	2	0	2	0.384905	-0.976622	0.545437	0.237345	0.437125	0	DAZL.target
MLLT10	Mllt10	ENSG00000078403.12	10	21823094	22032559	78.8426	0.437362	145.696	3351	209465	23	0	59007	0	5	0	1	1.3022	0.620527	1.16614	-0.111499	0.358008	0	DAZL.target
MLLT6	Mllt6	ENSG00000108292.12	17	36861795	36886056	59.0277	0.603335	172.05	3441	24261	20	1	58903	1	1	1	0	-0.00959211	0.98061	0.584439	1.0545	0.999937	0	DAZL.target
MOB1A	Mob1a	ENSG00000114978.13	2	74379655	74406025	55.3489	0.383569	117.833	707	26370	6	0	59060	0	4	0	0	0.227996	0.292185	0.522222	-0.42002	-0.0835588	0	DAZL.target
MOB2	Mob2	ENSG00000182208.8	11	1490687	1522477	52.3109	0.579234	345.5	1382	31790	4	0	58889	0	6	0	0	-0.252612	-0.137339	0.135904	-1.11577	-0.821645	0	DAZL.target
MOB4	Mob4	ENSG00000115540.10	2	198380295	198418423	61.4329	0.421594	90.75	726	38128	8	0	58941	0	2	0	0	0.330325	0.413342	0.576858	0.18944	0.442788	0	DAZL.target
MORC3	Morc3	ENSG00000159256.8	21	37692487	37758446	78.3182	0.421789	165.053	3136	65959	19	0	59054	0	3	0	0	1.02936	1.05764	1.04801	0.278476	0.659414	0	DAZL.target
MPHOSPH6	Mphosph6	ENSG00000135698.5	16	82181403	82203831	71.3458	0.40579	92.5	555	22428	6	0	58972	8	9	8	0	-2.84641	0.386972	-2.29537	-1.30896	-1.6712	0	DAZL.target
MPHOSPH8	Mphosph8	ENSG00000196199.9	13	20207788	20247599	82.9943	0.437274	191.786	2685	39811	14	2	58939	0	57	0	4	1.05232	-1.53494	1.63634	-2.53125	-2.47163	1	DAZL.target
MPP5	Mpp5	ENSG00000072415.4	14	67707826	67802536	76.8783	0.411231	162.462	2112	94710	13	0	59058	1	8	0	0	0.762783	0.805831	0.341773	-0.948973	-0.565364	0	DAZL.target
MPZL1	Mpzl1	ENSG00000197965.7	1	167690429	167761156	77.0918	0.476725	152.6	763	70727	5	0	59106	0	2	0	0	0.205723	0.279563	0.509579	0.137816	0.376865	0	DAZL.target
MRGBP	Mrgbp	ENSG00000101189.5	20	61427805	61431945	107.084	0.531163	136.667	410	4140	3	0	58998	1	4	0	0	0.382972	0.332933	0.237545	-0.196395	-0.0263219	0	DAZL.target
MRPL17	Mrpl17	ENSG00000158042.8	11	6702013	6704632	74.3512	0.574079	182	546	2619	3	0	59016	2	4	1	0	-0.913937	0.0454188	-0.62704	-0.489051	-0.582356	0	DAZL.target
MRPL44	Mrpl44	ENSG00000135900.3	2	224822121	224832431	78.6268	0.496671	255.75	1023	10310	4	0	59093	0	4	0	0	0.0557124	0.0949051	0.431648	-0.466232	-0.160336	0	DAZL.target
MRPS14	Mrps14	ENSG00000120333.4	1	174979925	174992561	91.4175	0.52256	165.333	496	12636	3	0	59065	2	3	0	1	0.185764	-0.588162	-0.432143	-0.100649	-0.222687	0	DAZL.target
MRPS16	Mrps16	ENSG00000182180.9	10	75006510	75012451	75.9038	0.563135	191.4	957	5941	5	0	59066	1	72	0	0	0.110703	0.153826	-0.0874489	-2.53125	-2.47163	0	DAZL.target
MRPS23	Mrps23	ENSG00000181610.8	17	55916842	55927417	79.0839	0.497926	127.6	638	10575	5	0	59067	0	10	0	9	0.189732	-2.87279	0.522083	-1.51118	-1.01752	0	DAZL.target
MRPS9	Mrps9	ENSG00000135972.4	2	105654441	105716418	66.3356	0.440806	114.273	1257	61977	11	0	59067	0	1	0	0	0.502846	0.589612	0.679548	0.60346	0.821026	0	DAZL.target
MSANTD2	Msantd2	ENSG00000120458.5	11	124636394	124670569	61.4155	0.498945	425.5	1702	34175	4	0	58627	0	1	0	0	-0.210151	-0.114245	0.19275	0.200659	0.324696	0	DAZL.target
MSANTD4	Msantd4	ENSG00000170903.6	11	105866350	105893130	129.622	0.422923	525	1050	26780	2	0	58966	0	3	0	0	0.591	0.442044	1.06967	0.178062	0.584588	0	DAZL.target
MSI1	Msi1	ENSG00000135097.2	12	120779133	120806983	80.6064	0.58716	85.2308	1108	27850	13	0	59096	0	3	0	1	0.72853	-0.0102993	0.847644	0.166328	0.483285	0	DAZL.target
MSI2	Msi2	ENSG00000153944.6	17	55333212	55762046	97.9175	0.482501	88.2308	1147	428834	13	0	59111	1	1	1	1	0.282436	0.523257	0.577054	0.895522	0.924916	0	DAZL.target
MSL1	Msl1	ENSG00000188895.7	17	38278551	38293042	63.8444	0.469795	139	1112	14491	8	0	58935	0	5	0	2	0.213963	-1.16967	0.494341	-0.62547	-0.278662	0	DAZL.target
MT1F	Mt1	ENSG00000198417.5	16	56691606	56694610	94.7859	0.614627	81.6667	245	3004	3	0	58903	3	75	0	0	0.337453	0.308423	-0.732291	-2.53125	-2.47163	0	DAZL.target
MT1M	Mt2	ENSG00000205364.3	16	56666145	56667898	118.318	0.594161	105	315	1753	3	0	59091	23	78	13	3	-2.84641	-1.57581	-2.62354	-2.53125	-2.47163	0	DAZL.target
MTA1	Mta1	ENSG00000182979.13	14	105886159	105937066	62.9461	0.584503	109.9	2198	50907	20	0	59028	0	4	0	1	0.872885	0.193741	0.867535	-0.0480313	0.296172	0	DAZL.target
MTA3	Mta3	ENSG00000057935.9	2	42721709	42984087	48.62	0.437508	113.429	1588	262378	14	0	59031	0	3	0	0	0.612719	0.821338	0.643587	-0.036285	0.258541	0	DAZL.target
MTF1	Mtf1	ENSG00000188786.9	1	38275239	38325292	94.6132	0.484913	232.4	2324	50053	10	0	58862	0	0	0	0	0.592518	0.581066	0.824387	1.08008	1.26943	0	DAZL.target
MTF2	Mtf2	ENSG00000143033.13	1	93544792	93604638	73.0778	0.415952	124.8	1872	59846	15	0	58995	0	0	0	0	0.831651	0.880829	0.918262	1.15194	1.36153	0	DAZL.target
MTHFD2	Mthfd2	ENSG00000065911.7	2	74425689	74444692	91.0168	0.461032	137.625	1101	19003	8	0	59092	2	8	2	1	-1.15864	-0.251159	-0.19625	-0.991657	-0.759848	0	DAZL.target
MTMR3	Mtmr3	ENSG00000100330.11	22	30279144	30426855	94.4175	0.497952	196.737	3738	147711	19	1	58935	0	0	0	0	1.2529	1.29139	1.44058	1.6227	1.87698	0	DAZL.target
MTMR6	Mtmr6	ENSG00000139505.10	13	25802307	25862147	69.0028	0.407187	139.286	1950	59840	14	1	58977	0	2	0	0	0.882676	0.939946	1.18623	0.690902	1.02496	0	DAZL.target
MTR	Mtr	ENSG00000116984.8	1	236958610	237067281	100.986	0.468751	132.667	4378	108671	33	0	59045	1	8	1	3	0.978443	-0.146104	1.11402	-0.27524	0.207102	0	DAZL.target
MTX2	Mtx2	ENSG00000128654.9	2	177134123	177202753	104.638	0.417178	78.9091	868	68630	11	0	58705	39	27	39	26	-2.84641	-2.87279	-2.62354	-2.53125	-2.47163	0	DAZL.target
MXI1	Mxi1	ENSG00000119950.16	10	111967363	112047123	55.9921	0.514459	154	924	79760	6	0	59005	0	0	0	0	0.00782805	0.150129	0.308539	0.711842	0.787043	0	DAZL.target
MYCBP2	Mycbp2	ENSG00000005810.13	13	77618792	77901185	87.2023	0.434257	177.357	14898	282393	84	0	58995	6	3	5	1	-0.384445	2.86276	-0.223995	1.47082	0.801358	0	DAZL.target
MYCL	Mycl	ENSG00000116990.9	1	40361098	40367928	68.3405	0.612862	619	1238	6830	2	0	58581	0	1	0	0	-0.245167	-0.184865	0.180135	0.168719	0.280565	0	DAZL.target
MYL12A	Myl12a	ENSG00000101608.8	18	3247479	3256234	98.3016	0.437145	182.667	548	8755	3	0	59038	4	8	0	0	0.351368	0.31223	-1.03427	-1.07872	-1.08729	0	DAZL.target
MYO1B	Myo1b	ENSG00000128641.13	2	192109911	192290115	92.472	0.423494	127.967	3839	180204	30	0	59126	2	2	0	2	1.80077	0.398273	0.556223	0.964915	0.923654	0	DAZL.target
MYO1H	Myo1h	ENSG00000174527.5	12	109785708	109893328	63.8861	0.460743	103.323	3203	107620	31	0	58911	4	4	4	4	-1.56951	-1.00635	-0.538257	0.222125	-0.0499802	0	DAZL.target
MYO9A	Myo9a	ENSG00000066933.11	15	72114632	72410918	82.8825	0.418919	198.075	7923	296286	40	0	59085	2	1	2	1	0.392956	1.43873	0.614648	1.3882	1.22467	0	DAZL.target
MZT1	Mzt1	ENSG00000204899.5	13	73282495	73301825	96.5683	0.405756	91	182	19330	2	0	58874	1	2	0	0	0.394887	0.351664	0.229762	0.288616	0.357172	0	DAZL.target
N4BP1	N4bp1	ENSG00000102921.3	16	48572637	48654059	85.0059	0.436555	423.667	2542	81422	6	0	58935	0	1	0	0	0.251274	0.266806	0.566199	0.450558	0.667506	0	DAZL.target
NAA30	Naa30	ENSG00000139977.9	14	57857262	57882635	103.608	0.468971	278.25	1113	25373	4	0	58848	0	0	0	0	0.374021	0.331311	0.751786	0.989915	1.17536	0	DAZL.target
NAA40	Naa40	ENSG00000110583.8	11	63706431	63724800	93.076	0.52652	95.25	762	18369	8	0	59007	2	3	1	0	-0.368133	0.547654	-0.201389	0.0983684	0.0125187	0	DAZL.target
NAA50	Naa50	ENSG00000121579.8	3	113435307	113465147	63.3718	0.415043	108	540	29840	5	0	59166	1	3	0	2	0.173402	-1.21475	-0.0447896	-0.175541	-0.104112	0	DAZL.target
NAB1	Nab1	ENSG00000138386.12	2	191511472	191557492	77.982	0.441154	189.375	1515	46020	8	0	58993	4	2	2	1	-1.30265	-0.353519	-1.11662	0.234416	-0.323587	0	DAZL.target
NAB2	Nab2	ENSG00000166886.8	12	57482677	57489259	65.0239	0.626335	231.429	1620	6582	7	0	58753	0	0	0	0	0.156982	0.197616	0.435023	0.810506	0.900346	0	DAZL.target
NABP1	Nabp1	ENSG00000173559.8	2	192542794	192561385	69.9352	0.420636	108.5	651	18591	6	0	59017	2	0	0	0	0.283332	0.329767	-0.418716	0.877685	0.439236	0	DAZL.target
NAE1	Nae1	ENSG00000159593.10	16	66836778	66907159	67.2027	0.385693	94.9	1898	70381	20	0	58879	0	3	0	1	1.14957	0.427228	1.11485	0.31353	0.709599	0	DAZL.target
NAP1L1	Nap1l1	ENSG00000187109.9	12	76438670	76478813	77.3525	0.408558	88.8667	1333	40143	15	0	59014	1	0	1	0	0.020577	0.962836	0.475593	1.21954	1.13101	0	DAZL.target
NAP1L4	Nap1l4	ENSG00000205531.8	11	2965667	3013607	74.3398	0.426612	84.0667	1261	47940	15	0	58958	4	10	1	5	-0.0476767	-2.15093	-0.823201	-1.19247	-1.07183	0	DAZL.target
NARS2	Nars2	ENSG00000137513.5	11	78147007	78285919	97.0234	0.451034	113.385	1474	138912	13	0	59092	0	84	0	6	0.989374	-2.48272	1.07765	-2.53125	-2.47163	0	DAZL.target
NASP	Nasp	ENSG00000132780.12	1	46049518	46084566	80.5763	0.465481	171.333	2570	35048	15	0	59111	1	46	0	5	0.752467	-2.28689	0.343092	-2.53125	-2.47163	0	DAZL.target
NBR1	Nbr1	ENSG00000188554.9	17	41322498	41363708	51.3218	0.469341	148.684	2825	41210	19	3	58916	1	3	1	0	0.186985	1.19547	1.37137	1.23283	1.32614	0	DAZL.target
NCAPD3	Ncapd3	ENSG00000151503.8	11	134020014	134095348	98.7929	0.48444	142.361	5125	75334	36	0	58854	10	10	4	5	-1.0899	-1.13042	-1.73281	-0.570472	-0.895812	0	DAZL.target
NCDN	Ncdn	ENSG00000020129.11	1	36023074	36032875	95.296	0.628699	332.143	2325	9801	7	0	58839	0	1	0	0	0.438873	0.376571	0.722621	0.625858	0.838336	0	DAZL.target
NCK2	Nck2	ENSG00000071051.9	2	106361354	106510730	55.4278	0.601152	387	1161	149376	3	0	59077	0	1	0	0	-0.186553	-0.0267422	0.142674	0.173302	0.270364	0	DAZL.target
NCL	Ncl	ENSG00000115053.11	2	232318242	232348352	101.506	0.45163	123.385	1604	30110	13	0	58999	0	4	0	4	0.966588	-1.66159	1.12273	0.0718849	0.508544	0	DAZL.target
NCOA6	Ncoa6	ENSG00000198646.9	20	33284722	33413452	88.9308	0.502288	482.308	6270	128730	13	0	58911	11	1	2	1	-1.17129	-0.237844	-2.62354	0.612817	-1.10613	0	DAZL.target
NCSTN	Ncstn	ENSG00000162736.11	1	160313062	160328742	105.093	0.494998	129	2322	15680	18	0	58896	0	0	0	0	1.19659	1.14794	1.27364	1.45966	1.71703	0	DAZL.target
NDEL1	Ndel1	ENSG00000166579.11	17	8316449	8393729	87.2396	0.482134	146.917	1763	77280	12	0	58977	0	4	0	0	0.705161	0.743228	0.858526	-0.120266	0.261377	0	DAZL.target
NDRG4	Ndrg4	ENSG00000103034.10	16	58496750	58547532	76.6284	0.584708	112.857	1580	50782	14	0	58895	0	1	0	1	0.7157	-0.00793846	0.813887	0.748383	0.964693	0	DAZL.target
NDUFB4	Ndufb4	ENSG00000065518.7	3	120315156	120321347	108.534	0.448367	155.667	467	6191	3	1	59102	1	2	0	1	0.607663	-0.239905	0.658791	0.673421	0.774328	0	DAZL.target
NDUFS1	Ndufs1	ENSG00000023228.9	2	206979541	207024327	86.7444	0.450913	128.056	2305	44786	18	0	59070	1	2	1	1	0.142045	0.285487	0.561958	0.611652	0.710935	0	DAZL.target
NECAP1	Necap1	ENSG00000089818.12	12	8234807	8250367	90.1326	0.511706	109.5	876	15560	8	1	59079	0	5	0	0	0.638917	0.65565	1.09185	-0.12279	0.298884	1	DAZL.target
NEDD4	Nedd4	ENSG00000069869.11	15	56119120	56285944	72.1531	0.414648	150.517	4365	166824	29	0	58991	1	4	1	2	0.596718	0.145721	0.75336	0.229282	0.482755	0	DAZL.target
NEDD8	Nedd8	ENSG00000129559.8	14	24686058	24701660	75.9846	0.46759	68.25	273	15602	4	0	58852	0	0	0	0	0.165393	0.217375	0.505723	0.844153	0.975178	0	DAZL.target
NEK7	Nek7	ENSG00000151414.10	1	198126093	198291550	95.62	0.39956	112.8	1128	165457	10	0	59032	6	2	5	1	-2.6218	0.179213	-1.33512	0.514445	-0.268738	0	DAZL.target
NEK9	Nek9	ENSG00000119638.8	14	75548822	75594047	80.6884	0.476594	134.591	2961	45225	22	0	59090	1	1	0	1	1.12744	0.389798	0.57097	0.969614	0.974479	0	DAZL.target
NFAT5	Nfat5	ENSG00000102908.16	16	69598997	69738569	78.4599	0.437785	338.571	4740	139572	14	0	59032	1	3	0	0	0.638831	0.681576	0.216988	0.0328961	0.149552	0	DAZL.target
NFATC2IP	Nfatc2ip	ENSG00000176953.6	16	28962128	28978418	78.191	0.550547	155.571	1089	16290	7	5	59251	24	23	0	1	0.980099	0.171925	-2.62354	-0.81189	-1.34975	1	DAZL.target
NFATC3	Nfatc3	ENSG00000072736.14	16	68118654	68263162	103.484	0.443808	310.091	3411	144508	11	0	58941	1	4	1	0	-0.109183	0.775567	0.44209	-0.0763648	0.149068	0	DAZL.target
NFE2L1	Nfe2l1	ENSG00000082641.11	17	46125691	46138849	122.631	0.561671	481	2405	13158	5	0	58830	0	1	0	0	0.51021	0.379235	0.925028	0.748289	1.00633	0	DAZL.target
NFYB	Nfyb	ENSG00000120837.3	12	104510855	104532067	133.078	0.368682	95.1429	666	21212	7	0	58941	2	2	2	1	-0.427712	0.275964	0.573252	0.881786	0.884206	0	DAZL.target
NID1	Nid1	ENSG00000116962.10	1	236139130	236228462	81.3877	0.560848	191.211	3633	89332	19	0	59047	0	7	0	2	0.928217	-0.481129	0.940277	-0.646148	-0.175868	0	DAZL.target
NIF3L1	Nif3l1	ENSG00000196290.10	2	201754050	201768655	91.4567	0.465305	205.667	1234	14605	6	0	59097	0	0	0	0	0.373784	0.362522	0.696324	0.967604	1.13988	0	DAZL.target
NINL	Ninl	ENSG00000101004.10	20	25433341	25566153	97.3895	0.561897	192.261	4422	132812	23	0	59027	7	24	3	8	-1.06194	-2.87279	-1.42731	-2.42342	-2.01712	0	DAZL.target
NIP7	Nip7	ENSG00000132603.9	16	69373333	69377014	104.187	0.505289	145.286	1017	3681	7	0	58780	1	15	0	0	0.577538	0.529562	0.347064	-1.9029	-1.33429	0	DAZL.target
NME1	Nme1	ENSG00000239672.3	17	49230897	49239789	80.0591	0.496046	96.4	482	8892	5	0	58966	1	0	0	0	0.221273	0.262093	0.0130126	0.884471	0.700548	0	DAZL.target
NMT2	Nmt2	ENSG00000152465.13	10	15144583	15210692	100.848	0.462362	190.417	2285	66109	12	0	59052	1	1	0	0	0.842414	0.814441	0.483938	0.850495	0.861788	0	DAZL.target
NOC2L	Noc2l	ENSG00000188976.6	1	879584	894689	67.312	0.605732	129.176	2196	15105	17	0	58921	5	24	1	0	-0.154918	0.812358	-1.28067	-2.53125	-2.3119	0	DAZL.target
NOC3L	Noc3l	ENSG00000173145.7	10	96075004	96122716	80.5792	0.382562	115.5	2541	47712	22	0	59019	1	4	0	1	1.36128	0.580646	0.765159	0.198393	0.476518	0	DAZL.target
NOC4L	Noc4l	ENSG00000184967.2	12	132628993	132637013	47.1779	0.630783	112.923	1468	8020	13	0	58964	3	14	0	0	0.39973	0.497	-0.850206	-1.96638	-1.71304	0	DAZL.target
NPAT	Npat	ENSG00000149308.12	11	108027942	108093369	82.1866	0.400286	248.556	4474	65427	18	0	59083	2	10	0	0	0.993026	0.977263	0.0432439	-1.13407	-0.771292	0	DAZL.target
NPC1	Npc1	ENSG00000141458.8	18	21086148	21166862	95.6825	0.479654	153.536	4299	80714	28	0	58874	1	4	0	0	1.55955	1.57357	0.884271	0.355697	0.623525	0	DAZL.target
NPLOC4	Nploc4	ENSG00000182446.9	17	79523913	79615495	53.1575	0.523733	127.812	2045	91582	16	0	58913	0	1	0	0	0.540822	0.693158	0.629967	0.617414	0.79438	0	DAZL.target
NPTN	Nptn	ENSG00000156642.12	15	73852355	73926475	81.8891	0.511977	155.625	1245	74120	8	2	59012	0	1	0	0	0.690064	0.748946	1.37249	1.27026	1.50335	0	DAZL.target
NR1D1	Nr1d1	ENSG00000126368.5	17	38249040	38256978	75.0027	0.578942	257	2056	7938	8	0	59086	0	2	0	0	0.225881	0.25304	0.507039	0.163493	0.382801	0	DAZL.target
NRAS	Nras	ENSG00000213281.4	1	115247090	115259515	124.515	0.44278	148.5	594	12425	4	0	59210	16	23	13	21	-2.84641	-2.87279	-2.62354	-2.51263	-2.47163	0	DAZL.target
NRBP1	Nrbp1	ENSG00000115216.9	2	27650657	27665126	111.692	0.490179	98.2778	1769	14469	18	0	59014	4	8	1	5	0.412164	-1.81146	-0.369701	-0.499656	-0.417128	0	DAZL.target
NSRP1	Nsrp1	ENSG00000126653.11	17	28442539	28513493	61.9284	0.448889	226.875	1815	70954	8	1	58991	1	3	0	0	0.330487	0.429072	0.256294	0.104613	0.187513	0	DAZL.target
NT5C2	Nt5c2	ENSG00000076685.14	10	104845940	104953056	81.0864	0.430215	102	1836	107116	18	0	59153	0	0	0	0	1.09793	1.1614	1.09352	1.29465	1.53134	0	DAZL.target
NUCKS1	Nucks1	ENSG00000069275.12	1	205681947	205719404	112.049	0.455148	115.429	808	37457	7	0	59086	1	0	0	0	0.771139	0.704022	0.524541	1.2446	1.16681	0	DAZL.target
NUDT16L1	Nudt16l1	ENSG00000168101.10	16	4743695	4745860	36.9105	0.674945	327.333	982	2165	3	0	58539	4	0	0	0	-0.262761	-0.174835	-1.65156	0.562939	-0.478233	0	DAZL.target
NUFIP2	Nufip2	ENSG00000108256.4	17	27582854	27621136	92.4302	0.402098	609.667	1829	38282	3	1	58754	1	1	0	0	0.329298	0.303681	0.38739	0.705502	0.693177	0	DAZL.target
NUMA1	Numa1	ENSG00000137497.13	11	71713910	71791739	93.4292	0.552764	268.2	6705	77829	25	0	58822	0	1	0	0	1.26081	1.2622	1.1773	1.06679	1.34125	0	DAZL.target
NUP107	Nup107	ENSG00000111581.5	12	69080514	69136785	81.9875	0.411961	106.179	2973	56271	28	0	59000	1	11	0	3	1.58207	-0.439766	0.887552	-0.953108	-0.395871	0	DAZL.target
NUP88	Nup88	ENSG00000108559.7	17	5264258	5323480	93.2182	0.447204	164.316	3122	59222	19	1	58986	0	4	0	2	1.28648	-0.17819	1.50975	0.42325	0.890381	0	DAZL.target
NUP93	Nup93	ENSG00000102900.8	16	56764017	56878797	89.4031	0.502494	132.571	2784	114780	21	0	58902	0	1	0	0	1.20167	1.25684	1.1578	1.0035	1.29162	0	DAZL.target
NVL	Nvl	ENSG00000143748.13	1	224415036	224518089	78.5116	0.446669	117.783	2709	103053	23	0	58945	0	1	0	0	1.25213	1.32753	1.1694	1.00208	1.29825	0	DAZL.target
NXT1	Nxt1	ENSG00000132661.3	20	23331373	23335414	89.5857	0.530233	429	429	4041	1	0	58787	0	1	0	0	-0.0466544	-0.0227412	0.403995	0.344639	0.512614	0	DAZL.target
OAT	Oat	ENSG00000065154.7	10	126085872	126107545	87.0314	0.459056	152.667	1374	21673	9	0	58962	1	1	0	0	0.536032	0.541238	0.244858	0.670354	0.638013	0	DAZL.target
ORC6	Orc6	ENSG00000091651.4	16	46723555	46732306	75.5041	0.500311	136.333	818	8751	6	0	58997	0	14	0	1	0.19836	-0.533951	0.513749	-2.05199	-1.47946	0	DAZL.target
ORMDL2	Ormdl2	ENSG00000123353.5	12	56211703	56215663	143.913	0.51767	177.333	532	3960	3	0	58995	1	3	0	0	0.841058	0.643799	0.789838	0.467447	0.670596	0	DAZL.target
ORMDL3	Ormdl3	ENSG00000172057.5	17	38077294	38083854	119.612	0.562185	160	480	6560	3	0	59022	0	4	0	0	0.539896	0.440132	0.942893	-0.0672405	0.32313	0	DAZL.target
OSBPL1A	Osbpl1a	ENSG00000141447.12	18	21742008	21977844	90.8591	0.433572	111.926	3022	235836	27	0	58912	7	2	7	1	-2.84641	0.996689	-1.2135	0.882448	-0.00190182	0	DAZL.target
OTUD7B	Otud7b	ENSG00000163113.10	1	149909705	149982625	82.0322	0.538218	239.273	2632	72920	11	0	59197	0	1	0	0	0.480949	0.522566	0.674435	0.614113	0.819987	0	DAZL.target
P4HB	P4hb	ENSG00000185624.10	17	79801035	79818570	127.508	0.54516	149.4	1494	17535	10	0	59026	2	8	1	4	0.124655	-1.68669	0.309589	-0.584745	-0.280979	0	DAZL.target
PABPN1	Pabpn1	ENSG00000100836.6	14	23790498	23795394	94.9066	0.502886	102.333	614	4896	6	0	59121	0	1	0	0	0.44217	0.432643	0.751882	0.663006	0.892789	0	DAZL.target
PACSIN2	Pacsin2	ENSG00000100266.13	22	43231418	43411151	87.1696	0.541107	145.75	1749	179733	12	0	58960	2	3	1	1	-0.166371	0.0468316	-0.163834	0.121273	0.0389429	0	DAZL.target
PAFAH1B2	Pafah1b2	ENSG00000168092.9	11	117014983	117047610	114.14	0.455285	144	720	32627	5	1	59016	1	4	1	0	-0.108674	0.728844	0.802028	0.248974	0.502074	1	DAZL.target
PAFAH2	Pafah2	ENSG00000158006.9	1	26286258	26324648	94.7665	0.533643	125.2	1252	38390	10	0	59089	1	0	1	0	-0.249885	0.663598	0.332782	1.13815	1.00606	0	DAZL.target
PALD1	Pald1	ENSG00000107719.8	10	72238577	72328205	64.0263	0.620422	141.316	2685	89628	19	0	59084	0	5	0	5	0.872279	-2.10211	0.852453	-0.298727	0.0784001	0	DAZL.target
PAN2	Pan2	ENSG00000135473.10	12	56710007	56727837	92.8728	0.503126	150.32	3758	17830	25	0	59076	0	1	0	1	1.34412	0.554864	1.28961	1.12768	1.43272	0	DAZL.target
PANK2	Pank2	ENSG00000125779.17	20	3869486	3907605	113.852	0.484123	251	1757	38119	7	0	59076	3	3	1	0	-0.252662	0.576499	-0.423791	0.196011	-0.0203578	0	DAZL.target
PAPOLA	Papola	ENSG00000090060.13	14	96967770	97033448	84.0396	0.410055	126.773	2789	65678	22	0	59083	0	6	0	1	1.31482	0.549002	1.26049	-0.255117	0.271411	0	DAZL.target
PAPOLG	Papolg	ENSG00000115421.8	2	60983365	61029220	76.063	0.398202	106.5	2343	45855	22	0	58986	0	24	0	22	1.2749	-2.87279	1.22127	-2.49489	-1.63604	0	DAZL.target
PARP1	Parp1	ENSG00000143799.8	1	226548392	226595780	104.264	0.501594	146.261	3364	47388	23	0	59088	2	1	1	1	0.504992	0.60063	0.390155	1.18647	0.998723	0	DAZL.target
PATL1	Patl1	ENSG00000166889.13	11	59404189	59436453	53.4325	0.484185	130.833	2355	32264	18	0	59024	0	0	0	0	0.6285	0.745141	0.715621	1.05751	1.197	0	DAZL.target
PATZ1	Patz1	ENSG00000100105.13	22	31721790	31742218	90.8529	0.576114	396.5	2379	20428	6	1	58868	0	0	0	0	0.366615	0.35394	0.895342	1.16633	1.32407	0	DAZL.target
PAWR	Pawr	ENSG00000177425.6	12	79968759	80084877	79.7498	0.398526	107.4	537	116118	5	0	58943	3	0	2	0	-1.24845	0.501328	-0.709367	0.934808	0.288631	0	DAZL.target
PCBP1	Pcbp1	ENSG00000169564.5	2	70314585	70316332	88.8841	0.569573	1077	1077	1747	1	0	59123	1	2	0	0	-0.229671	-0.19223	-0.28247	-0.17096	-0.221947	0	DAZL.target
PCBP2	Pcbp2	ENSG00000197111.11	12	53835525	53874946	91.6965	0.494088	115.467	1732	39421	15	0	58607	26	28	1	0	2.88489e-05	0.92897	-2.62354	-2.53125	-2.47163	0	DAZL.target
PCGF5	Pcgf5	ENSG00000180628.10	10	92979908	93044088	90.168	0.391443	91.6667	825	64180	9	0	59187	5	20	5	20	-2.75347	-2.87279	-1.10466	-2.37219	-1.94505	0	DAZL.target
PCNA	Pcna	ENSG00000132646.6	20	5095599	5107272	98.8027	0.450146	181.4	907	11673	5	0	59112	0	4	0	0	0.44538	0.406588	0.786687	-0.211203	0.172838	0	DAZL.target
PDCD11	Pdcd11	ENSG00000148843.9	10	105156405	105206049	94.8826	0.516207	162.647	5530	49644	34	0	59029	1	20	1	0	0.828943	1.75461	0.982327	-1.82911	-1.09203	0	DAZL.target
PDCD4	Pdcd4	ENSG00000150593.11	10	112631565	112659764	89.9399	0.405342	124.083	1489	28199	12	0	59024	0	0	0	0	0.876806	0.850939	1.03188	1.217	1.45909	0	DAZL.target
PDCD7	Pdcd7	ENSG00000090470.10	15	65409717	65426174	135.036	0.520391	123	369	16457	3	0	58901	1	1	1	0	-0.156384	0.603815	0.659545	0.984689	1.01479	0	DAZL.target
PDGFB	Pdgfb	ENSG00000100311.12	22	39619364	39640756	53.7461	0.597205	112.286	786	21392	7	0	58988	2	3	2	3	-1.61491	-1.86713	-0.635471	-0.206184	-0.396744	0	DAZL.target
PDIA6	Pdia6	ENSG00000143870.8	2	10923517	10978103	82.2018	0.497888	107.769	1401	54586	13	0	58781	0	7	0	1	0.71428	-0.0166183	0.849032	-0.748838	-0.278303	0	DAZL.target
PDS5B	Pds5b	ENSG00000083642.14	13	33160564	33352157	73.8692	0.387991	138.882	4722	191593	34	0	59089	4	2	0	1	1.8351	1.15049	-0.26133	0.929226	0.504124	0	DAZL.target
PDZD8	Pdzd8	ENSG00000165650.7	10	119040000	119134978	74.2851	0.467958	699	3495	94978	5	0	58926	1	3	0	1	-0.0960107	-0.815982	-0.26356	-0.396727	-0.363285	0	DAZL.target
PEF1	Pef1	ENSG00000162517.8	1	32095463	32110497	46.8783	0.583091	211.8	1059	15034	5	0	58728	1	3	0	0	-0.188937	-0.0682087	-0.359569	-0.362717	-0.391962	0	DAZL.target
PELI1	Peli1	ENSG00000197329.7	2	64319786	64371588	102.618	0.43137	215.5	1293	51802	6	0	59159	0	6	0	0	0.582301	0.537028	0.885562	-0.591475	-0.116064	0	DAZL.target
PELI2	Peli2	ENSG00000139946.5	14	56584532	56768244	76.8593	0.531502	216.5	1299	183712	6	0	58929	1	0	1	0	-0.657085	0.375145	-0.0525069	0.815018	0.616057	0	DAZL.target
PER1	Per1	ENSG00000179094.9	17	8043790	8059824	84.9249	0.624317	194.091	4270	16034	22	0	58967	0	4	0	0	1.14738	1.12468	1.11122	0.134039	0.527041	0	DAZL.target
PEX13	Pex13	ENSG00000162928.8	2	61244360	61279125	82.2971	0.444183	310.25	1241	34765	4	0	58941	1	5	0	0	0.150827	0.173476	-0.0208233	-0.670328	-0.476659	0	DAZL.target
PFAS	Pfas	ENSG00000178921.9	17	8150936	8173809	87.5781	0.601537	164.231	4270	22873	26	0	59023	3	4	3	0	-1.03283	1.35105	-0.151322	0.255333	0.133119	0	DAZL.target
PFDN2	Pfdn2	ENSG00000143256.4	1	161070346	161087901	79.0499	0.578177	122.25	489	17555	4	0	59197	0	3	0	0	0.150182	0.192528	0.480081	-0.140025	0.119925	0	DAZL.target
PFN1	Pfn1	ENSG00000108518.7	17	4848947	4852356	65.824	0.597543	207.333	622	3409	3	1	58940	0	1	0	0	0.0592352	0.130767	0.625583	0.613475	0.766207	0	DAZL.target
PGAP1	Pgap1	ENSG00000197121.10	2	197697728	197792520	68.7551	0.379229	108.556	2931	94792	27	0	58743	2	1	2	1	-0.197887	0.785374	0.332184	1.10088	0.918377	0	DAZL.target
PGD	Pgd	ENSG00000142657.16	1	10458649	10480201	98.1162	0.527144	118.923	1546	21552	13	0	59028	0	1	0	0	0.857746	0.842218	1.01566	0.884952	1.1524	0	DAZL.target
PGM2L1	Pgm2l1	ENSG00000165434.6	11	74041363	74109518	85.1299	0.43567	139.5	1953	68155	14	0	58993	2	1	1	0	-0.0505456	0.883317	-0.0288729	0.815057	0.576106	0	DAZL.target
PHACTR4	Phactr4	ENSG00000204138.8	1	28696114	28826881	82.5486	0.47878	153.812	2461	130767	16	0	59009	1	20	0	9	0.88403	-2.87279	0.396592	-2.35947	-1.69146	0	DAZL.target
PHC2	Phc2	ENSG00000134686.12	1	33789224	33896653	97.6682	0.594264	179	1969	107429	11	0	58823	1	0	0	0	0.780616	0.784221	0.386413	1.17624	1.04691	0	DAZL.target
PHF13	Phf13	ENSG00000116273.5	1	6673745	6684093	66.4165	0.568693	231.75	927	10348	4	0	59087	0	3	0	0	-0.0639373	0.00921401	0.302096	-0.28441	-0.0593301	0	DAZL.target
PHF20	Phf20	ENSG00000025293.11	20	34359896	34538303	75.2924	0.474232	163.211	3101	178407	19	0	59053	12	6	0	5	0.972679	-1.98623	-2.62354	-0.481646	-1.43876	0	DAZL.target
PHF21A	Phf21a	ENSG00000135365.11	11	45950871	46142985	71.9851	0.488516	118.111	2126	192114	18	0	58974	0	3	0	2	0.937644	-0.382308	0.906043	0.189101	0.527413	0	DAZL.target
PHF23	Phf23	ENSG00000040633.8	17	7138347	7143041	128.203	0.569558	248.4	1242	4694	5	0	59077	5	4	0	0	0.714056	0.567157	-0.986121	0.053855	-0.356689	0	DAZL.target
PHF5A	Phf5a	ENSG00000100410.3	22	41855721	41864729	75.391	0.483465	89.25	357	9008	4	0	59041	0	0	0	0	0.123767	0.177235	0.473404	0.823999	0.945579	0	DAZL.target
PI4KB	Pi4kb	ENSG00000143393.12	1	151264273	151300191	95.8032	0.525076	218.833	2626	35918	12	0	58871	1	0	1	0	-0.224467	0.667427	0.347135	1.14679	1.01852	0	DAZL.target
PIAS2	Pias2	ENSG00000078043.11	18	44388353	44500123	86.5622	0.412154	143.786	2013	111770	14	0	58596	0	56	0	2	0.952194	-0.490831	1.02906	-2.53125	-2.47163	0	DAZL.target
PICALM	Picalm	ENSG00000073921.13	11	85668727	85780924	75.2004	0.418627	100.429	2109	112197	21	0	58963	0	6	0	2	1.21152	-0.169504	1.14602	-0.342112	0.159576	0	DAZL.target
PIGW	Pigw	ENSG00000184886.3	17	34890847	34895159	113.919	0.394218	1521	1521	4312	1	2	59529	4	75	0	0	0.450551	0.365742	-0.35812	-2.53125	-2.47163	1	DAZL.target
PIK3C2A	Pik3c2a	ENSG00000011405.9	11	17099277	17229530	88.4114	0.398125	161.303	5323	130253	33	0	58874	2	8	2	3	0.161881	-0.170265	0.588019	-0.356157	0.00110924	0	DAZL.target
PIKFYVE	Pikfyve	ENSG00000115020.12	2	209130991	209223475	97.0672	0.436383	156.976	6593	92484	42	0	58888	17	4	17	2	-2.84641	0.754224	-2.62354	0.687841	-0.82564	0	DAZL.target
PIP4K2A	Pip4k2a	ENSG00000150867.9	10	22823778	23003484	77.0283	0.467136	129.636	1426	179706	11	0	59086	0	3	0	3	0.634463	-1.30622	0.746035	0.0369831	0.361386	0	DAZL.target
PIP4K2B	Pip4k2b	ENSG00000141720.7	17	36921942	36956379	117.54	0.522812	131.1	1311	34437	10	1	59120	0	4	0	1	1.07246	0.215809	1.5065	0.420135	0.879208	0	DAZL.target
PIP5K1C	Pip5k1c	ENSG00000186111.4	19	3630181	3700477	76.4658	0.611788	118.529	2015	70296	17	0	59037	0	3	0	3	0.912278	-1.0845	0.928005	0.232593	0.557405	0	DAZL.target
PKIG	Pkig	ENSG00000168734.9	20	43160426	43252888	109.194	0.604878	125.667	377	92462	3	0	59001	8	0	0	0	0.524256	0.494278	-2.09078	1.09021	-0.468923	0	DAZL.target
PLAGL2	Plagl2	ENSG00000126003.6	20	30780306	30795594	71.7055	0.567578	751.5	1503	15288	2	0	58898	0	0	0	0	-0.308956	-0.236192	0.14298	0.498151	0.553208	0	DAZL.target
PLCB3	Plcb3	ENSG00000149782.7	11	64018995	64036622	80.8874	0.594454	123.31	3576	17627	29	0	59007	0	17	0	3	1.45247	-0.569305	1.29366	-1.71207	-0.98855	0	DAZL.target
PLEKHA1	Plekha1	ENSG00000107679.10	10	124134212	124191867	71.2059	0.42164	116.455	1281	57655	11	0	58965	1	1	0	0	0.59293	0.652889	0.226721	0.651524	0.617563	0	DAZL.target
PLEKHG2	Plekhg2	ENSG00000090924.10	19	39903225	39919054	92.1837	0.58094	249.353	4239	15829	17	0	58974	1	3	1	3	-0.0361089	-1.22147	0.435344	0.260795	0.386842	0	DAZL.target
PNN	Pnn	ENSG00000100941.4	14	39644387	39652422	103.702	0.466578	108.25	866	8035	8	0	58737	1	0	0	0	0.697481	0.64921	0.432395	1.19056	1.09081	0	DAZL.target
POGLUT1	Poglut1	ENSG00000163389.6	3	119187785	119213555	78.8714	0.465335	113.692	1478	25770	13	0	59017	0	8	0	7	0.688346	-2.87279	0.840224	-0.937864	-0.436303	0	DAZL.target
POGZ	Pogz	ENSG00000143442.17	1	151375200	151431941	97.8488	0.483966	261.941	4453	56741	17	0	58815	2	100	0	0	0.950335	0.916154	0.0507519	-2.53125	-2.47163	0	DAZL.target
POLE4	Pole4	ENSG00000115350.7	2	75185619	75197255	133.112	0.403406	53	159	11636	3	0	59127	0	32	0	21	0.938052	-2.87279	1.34509	-2.53125	-2.03161	0	DAZL.target
POLR2D	Polr2d	ENSG00000144231.6	2	128603840	128615731	100.644	0.451583	124.667	374	11891	3	0	59137	0	0	0	0	0.38317	0.345472	0.759001	1.0077	1.19643	0	DAZL.target
POLR2E	Polr2e	ENSG00000099817.7	19	1086594	1095598	58.3236	0.608331	117.286	821	9004	7	0	59126	4	4	2	2	-1.55673	-1.23754	-1.3546	-0.425641	-0.842493	0	DAZL.target
POLR2M	Polr2m	ENSG00000255529.3	15	57884231	58074960	81.2548	0.452854	165.071	2311	190729	14	0	58949	2	2	0	0	0.831601	0.920514	-0.114324	0.421539	0.272756	0	DAZL.target
POLR3B	Polr3b	ENSG00000013503.5	12	106751436	106903976	93.1456	0.435571	128.607	3601	152540	28	0	58999	8	0	0	0	1.67937	1.72494	-1.44345	1.61433	0.173102	0	DAZL.target
POMP	Pomp	ENSG00000132963.7	13	29233241	29253062	75.4871	0.385202	77	462	19821	6	0	59064	0	5	0	0	0.466401	0.475968	0.732642	-0.496511	-0.0766805	0	DAZL.target
POU2F1	Pou2f1	ENSG00000143190.17	1	167190066	167396582	84.9708	0.516037	147.5	2360	206516	16	0	59058	0	4	0	1	0.940808	0.258837	0.941985	-0.0450269	0.342098	0	DAZL.target
PPA1	Ppa1	ENSG00000180817.7	10	71962586	71993667	68.9799	0.400222	81.3636	895	31081	11	0	59039	3	0	3	0	-1.74395	0.691264	-0.592764	1.05802	0.420722	0	DAZL.target
PPFIA1	Ppfia1	ENSG00000131626.11	11	70116806	70230509	94.4312	0.482206	145.269	3777	113703	26	1	59117	0	5	0	0	1.62811	1.66761	1.69493	0.369879	0.886998	1	DAZL.target
PPFIBP1	Ppfibp1	ENSG00000110841.9	12	27676364	27848497	90.8148	0.436009	122.821	3439	172133	28	1	58873	1	9	0	4	1.81374	-0.710769	1.2613	-0.328727	0.199395	1	DAZL.target
PPM1G	Ppm1g	ENSG00000115241.9	2	27604061	27632554	127.278	0.495755	180.625	1445	28493	8	0	58990	0	3	0	0	0.915668	0.78644	1.2362	0.405707	0.816837	0	DAZL.target
PPP1CA	Ppp1ca	ENSG00000172531.10	11	67165654	67188654	63.1392	0.591909	165.625	1325	23000	8	0	58971	0	0	0	0	0.189282	0.266104	0.44737	0.832891	0.924618	0	DAZL.target
PPP1CB	Ppp1cb	ENSG00000213639.5	2	28974506	29025806	81.6297	0.403591	153.714	1076	51300	7	0	59055	0	2	0	0	0.500519	0.511949	0.751872	0.287585	0.590338	0	DAZL.target
PPP1R12A	Ppp1r12a	ENSG00000058272.11	12	80167343	80329240	63.1822	0.410318	128.909	2836	161897	22	0	58995	1	10	0	0	1.13809	1.25793	0.510246	-1.11254	-0.649377	0	DAZL.target
PPP1R15B	Ppp1r15b	ENSG00000158615.8	1	204372515	204380919	106.335	0.449902	1077	2154	8404	2	0	58901	0	1	0	0	0.0418184	-0.0112016	0.534729	0.333255	0.551616	0	DAZL.target
PPP1R8	Ppp1r8	ENSG00000117751.13	1	28157289	28178187	80.6141	0.508301	151.75	1214	20898	8	0	59166	0	1	0	1	0.357892	-0.38517	0.625417	0.573129	0.77497	0	DAZL.target
PPP2R1B	Ppp2r1b	ENSG00000137713.11	11	111597632	111637151	75.6524	0.454123	124.882	2123	39519	17	0	58990	2	9	0	8	0.870773	-2.87279	-0.0570158	-1.02263	-0.735293	0	DAZL.target
PPP2R5E	Ppp2r5e	ENSG00000154001.9	14	63838075	64010092	74.1813	0.395287	119.846	1558	172017	13	0	59243	0	91	0	90	0.869992	-2.87279	0.921248	-2.53125	-2.47163	0	DAZL.target
PPP4C	Ppp4c	ENSG00000149923.9	16	30087299	30096698	94.649	0.577678	135.625	1085	9399	8	3	59198	20	29	0	0	0.988661	0.950003	-2.62354	-2.00691	-2.08808	1	DAZL.target
PPP6R3	Ppp6r3	ENSG00000110075.10	11	68228186	68382802	64.8322	0.445631	119.036	3333	154616	28	0	59083	0	3	0	1	1.35564	0.71547	1.16868	0.411116	0.787318	0	DAZL.target
PPRC1	Pprc1	ENSG00000148840.6	10	103892787	103910082	85.9296	0.540182	397	4764	17295	12	0	58931	0	1	0	1	0.421554	-0.383014	0.651489	0.598698	0.800849	0	DAZL.target
PRC1	Prc1	ENSG00000198901.9	15	91509270	91538859	133.546	0.483585	134.733	2021	29589	15	1	59086	8	12	4	5	-1.44429	-1.65529	-0.985488	-0.66734	-0.662329	1	DAZL.target
PRDM16	Prdm16	ENSG00000142611.12	1	2985732	3355185	74.3339	0.593199	231.412	3934	369453	17	0	59047	0	14	0	1	0.934773	0.291418	0.823569	-1.81049	-1.1975	0	DAZL.target
PRDM2	Prdm2	ENSG00000116731.18	1	14026693	14151574	69.125	0.457285	527.4	5274	124881	10	0	58963	0	1	0	0	0.180115	0.248372	0.415153	0.373435	0.547664	0	DAZL.target
PRDM4	Prdm4	ENSG00000110851.7	12	108126643	108155049	88.977	0.490958	226.455	2491	28406	11	0	59089	2	0	0	0	0.563334	0.559228	-0.211307	1.06067	0.648096	0	DAZL.target
PRDX1	Prdx1	ENSG00000117450.9	1	45976708	45988719	159.606	0.469862	126	630	12011	5	0	59041	3	7	1	0	0.335282	0.971721	0.329888	-0.110721	0.0930549	0	DAZL.target
PREX1	Prex1	ENSG00000124126.9	20	47240790	47444420	94.9871	0.586413	134.026	5093	203630	38	0	58950	13	8	8	7	-2.84641	-1.77229	-2.31886	-0.233375	-0.975991	0	DAZL.target
PRG4	Prg4	ENSG00000116690.7	1	186265405	186283694	103.787	0.437823	351.167	4214	18289	12	0	59046	7	3	0	0	0.759155	0.661998	-1.67949	0.204472	-0.588984	0	DAZL.target
PRKACA	Prkaca	ENSG00000072062.9	19	14202500	14228896	95.8345	0.520469	110.444	994	26396	9	0	59029	1	1	0	1	0.624013	-0.160912	0.32376	0.75341	0.722915	0	DAZL.target
PRKAR1A	Prkar1a	ENSG00000108946.10	17	66507921	66547460	100.311	0.445323	128.8	1288	39539	10	0	58993	0	0	0	0	0.802112	0.769809	1.01274	1.2147	1.44574	0	DAZL.target
PRKD3	Prkd3	ENSG00000115825.5	2	37477645	37551951	83.6431	0.411131	157.667	2838	74306	18	0	59004	1	2	0	0	1.0821	1.0934	0.572303	0.594357	0.707026	0	DAZL.target
PRMT5	Prmt5	ENSG00000100462.11	14	23389720	23398794	102.383	0.526176	113.895	2164	9074	19	0	59046	2	22	2	13	-0.479995	-2.87279	0.27009	-2.25121	-1.57155	0	DAZL.target
PRPF19	Prpf19	ENSG00000110107.4	11	60658202	60674060	55.5884	0.555046	100.688	1611	15858	16	0	58909	0	2	0	0	0.561818	0.675199	0.671904	0.33785	0.567037	0	DAZL.target
PRPF38A	Prpf38a	ENSG00000134748.12	1	52870236	52886511	72.1006	0.492857	106.7	1067	16275	10	0	59030	0	4	0	0	0.419878	0.485018	0.642123	-0.267797	0.0665412	0	DAZL.target
PRPF39	Prpf39	ENSG00000185246.13	14	45553302	45585485	52.7525	0.391459	134.353	2284	32183	17	0	58937	14	3	13	0	-2.84641	0.826108	-2.62354	0.110882	-1.46614	0	DAZL.target
PRR14L	Prr14l	ENSG00000183530.9	22	32072242	32146126	39.2253	0.491195	752.222	6770	73884	9	1	58947	0	1	0	1	-0.21389	-0.858625	0.33215	0.384508	0.479288	0	DAZL.target
PRTG	Prtg	ENSG00000166450.8	15	55903744	56035288	82.9628	0.445884	182.789	3473	131544	19	0	59091	0	6	0	1	1.05029	0.319724	1.04291	-0.415565	0.0676586	0	DAZL.target
PSAP	Psap	ENSG00000197746.9	10	73576055	73611126	99.3097	0.54299	119.286	1670	35071	14	0	59088	1	3	1	2	0.0244642	-0.538491	0.527302	0.315532	0.465792	0	DAZL.target
PSMA1	Psma1	ENSG00000256206.2	11	14515329	14541890	81.8446	0.413135	111.083	1333	26561	12	0	58936	1	4	0	0	0.775399	0.782761	0.395446	-0.0903003	0.123998	0	DAZL.target
PSMA1	Psma1	ENSG00000129084.13	11	14515329	14665181	78.0518	0.421881	102.643	1437	149852	14	0	58933	1	4	0	0	0.901185	0.985535	0.413734	-0.0753024	0.137901	0	DAZL.target
PSMA7	Psma7	ENSG00000101182.10	20	60711791	60718496	84.2184	0.55053	138	828	6705	6	0	59123	0	3	0	0	0.288802	0.311261	0.594068	-0.055081	0.229808	0	DAZL.target
PSMA8	Psma8	ENSG00000154611.10	18	23713816	23773319	78.1989	0.395445	116.429	815	59503	7	0	59115	2	0	1	0	-0.390783	0.542753	-0.242144	0.987416	0.592854	0	DAZL.target
PSMB2	Psmb2	ENSG00000126067.7	1	36067185	36107445	112.417	0.51059	107	642	40260	6	0	58799	3	0	3	0	-1.72879	0.615597	-0.43144	1.2016	0.578617	0	DAZL.target
PSMC6	Psmc6	ENSG00000100519.7	14	53173890	53195305	82.02	0.409439	96.2143	1347	21415	14	0	59058	0	1	0	0	0.908366	0.914125	1.01981	0.848579	1.13935	0	DAZL.target
PSMD14	Psmd14	ENSG00000115233.7	2	162164549	162268228	36.5164	0.430548	96.3	963	103679	10	0	58710	1	9	1	9	-0.711771	-2.87279	-0.109747	-1.42561	-1.11978	0	DAZL.target
PSME3	Psme3	ENSG00000131467.6	17	40976402	40995774	84.8412	0.460443	73.25	879	19372	12	0	59072	0	0	0	0	0.749985	0.777013	0.910696	1.16447	1.36603	0	DAZL.target
PSMG1	Psmg1	ENSG00000183527.7	21	40546695	40555777	75.1186	0.389588	128.167	769	9082	6	0	59173	0	3	0	1	0.406347	-0.371904	0.692436	-0.0430837	0.294124	0	DAZL.target
PSMG2	Psmg2	ENSG00000128789.16	18	12658737	12725739	68.1872	0.460688	124.444	1120	67002	9	0	59056	3	6	2	0	-1.32374	0.463071	-0.810861	-0.766321	-0.821269	0	DAZL.target
PTBP1	Ptbp1	ENSG00000011304.12	19	797075	812327	85.8325	0.578622	137.214	1921	15252	14	0	59101	0	19	0	1	0.766306	-0.00667444	0.892581	-2.26483	-1.55801	0	DAZL.target
PTBP2	Ptbp2	ENSG00000117569.14	1	97187221	97289294	89.8513	0.427949	123.571	1730	102073	14	0	59066	0	3	0	3	0.969086	-1.06113	1.05171	0.26108	0.650215	0	DAZL.target
PTEN	Pten	ENSG00000171862.5	10	89622870	89731687	84.6301	0.376357	140.667	1266	108817	9	0	59146	0	0	0	0	0.772427	0.780204	0.931983	1.1039	1.3406	0	DAZL.target
PTGES3	Ptges3	ENSG00000110958.11	12	57057127	57082159	59.4388	0.376809	74.7143	523	25032	7	0	58963	1	0	0	0	0.383575	0.435394	0.101082	0.905819	0.758	0	DAZL.target
PTPN2	Ptpn2	ENSG00000175354.14	18	12785477	12929642	65.3387	0.424928	129.909	1429	144165	11	0	59026	0	2	0	2	0.56013	-0.784569	0.691315	0.269455	0.544843	0	DAZL.target
PTPRA	Ptpra	ENSG00000132670.16	20	2844830	3019722	98.5955	0.495388	117.704	3178	174892	27	0	59045	1	15	1	4	0.738095	-0.881041	0.929344	-1.41022	-0.759086	0	DAZL.target
PTPRF	Ptprf	ENSG00000142949.12	1	43990858	44089343	77.246	0.590967	186.324	6335	98485	34	0	59021	0	4	0	4	1.57405	-0.933617	1.30096	0.330667	0.735126	0	DAZL.target
PUM1	Pum1	ENSG00000134644.11	1	31404353	31538838	107.445	0.509983	180.381	3788	134485	21	0	59006	1	8	1	6	0.455677	-2.15558	0.802784	-0.541051	-0.101698	0	DAZL.target
PUM2	Pum2	ENSG00000055917.11	2	20448452	20551995	85.3182	0.446947	166	3320	103543	20	0	59093	2	6	0	1	1.12514	0.380004	0.114951	-0.358189	-0.179148	0	DAZL.target
PUS7L	Pus7l	ENSG00000129317.10	12	44122410	44152620	74.0412	0.372366	269.25	2154	30210	8	0	59014	3	2	2	0	-1.23022	0.449497	-0.68384	0.236954	-0.109599	0	DAZL.target
PWP1	Pwp1	ENSG00000136045.7	12	108079509	108106944	88.3582	0.44214	108.667	1630	27435	15	0	59093	2	1	1	0	0.0393808	0.95197	0.0564058	0.890727	0.663894	0	DAZL.target
PXDN	Pxdn	ENSG00000130508.6	2	1635659	1748624	51.0656	0.533596	199.318	4385	112965	22	0	59105	1	39	1	16	-0.174111	-2.87279	0.186923	-2.53125	-2.47163	0	DAZL.target
PYGO2	Pygo2	ENSG00000163348.3	1	154929502	154936329	152.215	0.531988	421.667	1265	6827	3	0	58961	0	10	0	0	0.839042	0.602378	1.38244	-0.907969	-0.268446	0	DAZL.target
QSER1	Qser1	ENSG00000060749.10	11	32914724	33014862	74.7317	0.382174	498.636	5485	100138	11	0	59007	0	8	0	2	0.471629	-0.993105	0.663084	-1.15229	-0.652785	0	DAZL.target
R3HDM1	R3hdm1	ENSG00000048991.12	2	136289025	136482840	82.979	0.451216	139.92	3498	193815	25	1	59064	3	4	2	0	-0.143098	1.65092	0.180585	0.492519	0.426034	1	DAZL.target
R3HDM2	R3hdm2	ENSG00000179912.15	12	57643392	57824788	50.4832	0.507443	136.208	3269	181396	24	0	58694	0	0	0	0	0.946708	1.1427	0.847611	1.17172	1.32217	0	DAZL.target
RAB11A	Rab11a	ENSG00000103769.5	15	66018392	66184329	90.3187	0.403563	115.5	693	165937	6	1	59010	0	2	0	2	0.783247	-0.631387	1.17626	0.637324	0.987567	0	DAZL.target
RAB11B	Rab11b	ENSG00000185236.7	19	8454865	8469318	53.7228	0.595327	142.2	711	14453	5	0	59031	0	2	0	0	-0.0600812	0.0435766	0.273375	0.00348322	0.166208	0	DAZL.target
RAB11FIP4	Rab11fip4	ENSG00000131242.11	17	29718642	29865236	68.2634	0.57034	124.6	1869	146594	15	2	59041	9	1	0	0	0.996679	1.12439	-1.68001	1.38912	-0.0708671	1	DAZL.target
RAB18	Rab18	ENSG00000099246.12	10	27793197	27831143	69.5151	0.439693	596.222	5366	37946	9	1	58927	7	2	7	0	-2.84641	0.247139	-1.95154	0.313221	-0.722682	1	DAZL.target
RAB1A	Rab1a	ENSG00000138069.12	2	65297835	65357240	30.1191	0.418258	106	636	59405	6	0	58966	0	5	0	0	-0.0958048	0.0710222	0.256881	-0.808845	-0.517842	0	DAZL.target
RAB21	Rab21	ENSG00000080371.4	12	72148654	72184699	54.2391	0.42244	102.857	720	36045	7	0	59132	2	30	1	1	-0.724714	-0.497973	-0.52734	-2.53125	-2.47163	0	DAZL.target
RAB22A	Rab22a	ENSG00000124209.3	20	56884752	56942563	76.2008	0.429998	97.5	585	57811	6	0	58956	0	0	0	0	0.36152	0.416446	0.630654	0.91722	1.08025	0	DAZL.target
RAB40C	Rab40c	ENSG00000197562.5	16	639357	679272	75.3566	0.624037	147	882	39915	6	0	58865	0	2	0	0	0.290222	0.331346	0.54509	0.191535	0.41366	0	DAZL.target
RAB6A	Rab6a	ENSG00000175582.15	11	73386683	73472182	85.5066	0.454192	90.25	722	85499	8	0	59150	1	11	1	3	-0.347786	-1.44049	0.239004	-1.4796	-1.02511	0	DAZL.target
RABEP1	Rabep1	ENSG00000029725.12	17	5185558	5289129	69.6899	0.432123	169.25	2708	103571	16	1	58945	0	1	0	0	0.923392	1.00579	1.18134	1.02658	1.30209	0	DAZL.target
RABL3	Rabl3	ENSG00000144840.4	3	120405528	120461840	104.295	0.440904	94.875	759	56312	8	1	59017	9	4	2	0	-0.768937	0.899835	-1.80577	0.272637	-0.585003	1	DAZL.target
RAD51	Rad51	ENSG00000051180.12	15	40986972	41024354	100.959	0.475243	121	1089	37382	9	0	58978	0	5	0	0	0.714795	0.692149	0.950839	-0.290947	0.148337	0	DAZL.target
RALBP1	Ralbp1	ENSG00000017797.7	18	9475007	9538114	64.7363	0.483828	194.625	1557	63107	8	0	59002	0	3	0	2	0.190588	-1.17245	0.456675	-0.173464	0.0909832	0	DAZL.target
RALGAPA1	Ralgapa1	ENSG00000174373.11	14	36007558	36278510	62.103	0.39624	160.317	6573	270952	41	0	58898	6	1	6	1	-2.11759	1.35756	-0.898402	1.28862	0.349291	0	DAZL.target
RALGPS2	Ralgps2	ENSG00000116191.13	1	178694300	178889238	73.1601	0.400307	100.579	1911	194938	19	0	58962	2	0	1	0	0.280728	1.29631	0.112265	1.28561	0.939494	0	DAZL.target
RANBP1	Ranbp1	ENSG00000099901.12	22	20103461	20114878	57.3537	0.542412	280.833	1685	11417	6	1	59184	12	33	0	0	0.0387196	0.13578	-2.62354	-2.53125	-2.47163	1	DAZL.target
RAP1B	Rap1b	ENSG00000127314.13	12	69004619	69054372	95.0338	0.386121	110.167	661	49753	6	0	59000	0	8	0	4	0.682097	-1.94665	0.939135	-0.93893	-0.385398	0	DAZL.target
RARG	Rarg	ENSG00000172819.12	12	53604354	53626764	82.2305	0.588015	193.75	1550	22410	8	0	58994	0	1	0	0	0.373589	0.391379	0.626095	0.579022	0.770781	0	DAZL.target
RASA3	Rasa3	ENSG00000185989.9	13	114747194	114898086	87.4375	0.542314	108.435	2494	150892	23	0	58850	15	23	13	17	-2.84641	-2.87279	-2.62354	-2.38034	-2.41351	0	DAZL.target
RASD2	Rasd2	ENSG00000100302.6	22	35936915	35950048	62.822	0.600428	406.5	813	13133	2	1	58995	0	1	0	0	-0.0995344	-0.0103423	0.507947	0.49433	0.626721	0	DAZL.target
RASSF3	Rassf3	ENSG00000153179.7	12	65004293	65091347	82.3851	0.501291	149.4	747	87054	5	0	59193	0	6	0	0	0.25504	0.325587	0.547771	-0.80653	-0.413279	0	DAZL.target
RB1	Rb1	ENSG00000139687.9	13	48877887	49056122	71.187	0.367463	107.923	2806	178235	26	0	59003	9	0	0	0	1.58154	1.66398	-1.79456	1.48198	-0.103098	0	DAZL.target
RBBP4	Rbbp4	ENSG00000162521.14	1	33116743	33151812	97.4026	0.444798	117	1755	35069	15	0	58703	1	10	0	0	1.0442	1.02059	0.613908	-1.04486	-0.552291	0	DAZL.target
RBBP5	Rbbp5	ENSG00000117222.9	1	205055270	205091143	97.2683	0.466387	130.214	1823	35873	14	0	59037	0	2	0	0	0.940706	0.922925	1.0751	0.58677	0.926724	0	DAZL.target
RBBP6	Rbbp6	ENSG00000122257.14	16	24549014	24584184	76.2252	0.411922	318.438	5095	35170	16	0	58932	0	1	0	0	0.722334	0.708912	0.841903	0.719183	0.975859	0	DAZL.target
RBFOX2	Rbfox2	ENSG00000100320.18	22	36134783	36424473	111.461	0.484443	87.9286	1231	289690	14	1	59040	3	1	3	0	-0.943501	1.49572	0.229155	1.3541	0.980283	0	DAZL.target
RBM14	Rbm14	ENSG00000239306.4	11	66384053	66394818	62.6891	0.569246	538	2152	10765	4	0	58863	0	1	0	0	-0.25956	-0.187034	0.153344	0.174296	0.281392	0	DAZL.target
RBM25	Rbm25	ENSG00000119707.9	14	73525144	73588122	93.7617	0.418471	134.5	2152	62978	16	0	58841	1	6	1	4	0.191445	-1.50654	0.634817	-0.345987	0.00947862	0	DAZL.target
RBM38	Rbm38	ENSG00000132819.12	20	55966463	55984389	57.9385	0.609861	151.4	757	17926	5	0	58921	0	1	0	1	0.00282318	-0.693936	0.320397	0.357158	0.480567	0	DAZL.target
RBM39	Rbm39	ENSG00000131051.16	20	34291531	34330234	80.1885	0.429868	112.118	1906	38703	17	0	59037	13	1	0	1	0.984415	0.230751	-2.62354	0.883942	-0.976681	0	DAZL.target
RBM42	Rbm42	ENSG00000126254.7	19	36119932	36128588	85.204	0.633353	155.444	1399	8656	9	0	59041	1	1	0	0	0.562653	0.545255	0.230663	0.689218	0.627303	0	DAZL.target
RBMS1	Rbms1	ENSG00000153250.13	2	161128662	161350305	84.7092	0.456572	103.786	1453	221643	14	0	58938	1	1	1	0	0.0426477	1.05928	0.434164	0.812179	0.811264	0	DAZL.target
RBX1	Rbx1	ENSG00000100387.8	22	41347351	41369313	76.6023	0.507417	71.4	357	21962	5	0	59024	0	0	0	0	0.198565	0.260652	0.513847	0.866328	0.989676	0	DAZL.target
RC3H1	Rc3h1	ENSG00000135870.7	1	173900352	173991435	95.4611	0.474625	185.105	3517	91083	19	0	59039	1	4	1	3	0.215144	-0.927853	0.613785	0.116348	0.351208	0	DAZL.target
RCAN1	Rcan1	ENSG00000159200.13	21	35885440	35987441	68.6933	0.482279	203.25	813	102001	4	0	59408	0	52	0	1	0.0399135	-0.623317	0.362624	-2.53125	-2.47163	0	DAZL.target
RCAN3	Rcan3	ENSG00000117602.7	1	24829387	24867530	63.4971	0.48233	187.5	750	38143	4	0	59206	0	0	0	0	-0.0452399	0.0533679	0.316502	0.695216	0.784695	0	DAZL.target
RCC2	Rcc2	ENSG00000179051.9	1	17733256	17766220	81.6913	0.557535	122.727	1350	32964	11	0	59139	1	1	1	0	-0.339911	0.609658	0.215596	0.687946	0.627135	0	DAZL.target
RDX	Rdx	ENSG00000137710.10	11	110045605	110167447	91.2979	0.397728	145.25	1743	121842	12	0	58989	2	9	1	9	0.0374099	-2.87279	0.056046	-1.00299	-0.666301	0	DAZL.target
RERE	Rere	ENSG00000142599.13	1	8412457	8877702	91.5835	0.542969	237.783	5469	465245	23	0	59018	1	4	0	3	1.44175	-0.507626	0.643752	0.132942	0.363761	0	DAZL.target
REV1	Rev1	ENSG00000135945.5	2	100016938	100106497	87.4165	0.430593	177.818	3912	89559	22	0	58939	0	1	0	0	1.25231	1.26561	1.20727	1.01823	1.33087	0	DAZL.target
RFFL	Rffl	ENSG00000092871.12	17	33333009	33416338	74.5989	0.552639	189	1134	83329	6	1	58801	0	1	0	0	0.330907	0.422946	0.79967	0.741188	0.934389	0	DAZL.target
RFWD3	Rfwd3	ENSG00000168411.9	16	74655292	74700779	98.3306	0.50164	199.75	2397	45487	12	0	59019	4	5	2	0	-0.946581	0.727864	-0.827659	-0.286886	-0.489907	0	DAZL.target
RFX7	Rfx7	ENSG00000181827.10	15	56379478	56535483	46.2683	0.455772	490.444	4414	156005	9	0	58741	0	0	0	0	-0.0648042	0.0810427	0.207665	0.596276	0.662524	0	DAZL.target
RHEBL1	Rhebl1	ENSG00000167550.6	12	49458468	49463808	129.14	0.510497	84.625	677	5340	8	1	58713	1	8	0	6	1.13775	-2.51207	1.10768	-0.297549	0.171479	1	DAZL.target
RHNO1	Rhno1	ENSG00000171792.6	12	2985424	2998626	74.6369	0.533016	364.5	729	13202	2	0	58960	0	5	0	0	-0.146734	-0.0813308	0.277662	-0.826097	-0.518646	0	DAZL.target
RHOBTB1	Rhobtb1	ENSG00000072422.12	10	62629196	62761198	95.9314	0.502086	238.667	2148	132002	9	0	59122	1	0	1	0	-0.320347	0.614989	0.261929	1.05071	0.917132	0	DAZL.target
RHPN2	Rhpn2	ENSG00000131941.3	19	33469499	33555794	84.4314	0.533168	148.286	2076	86295	14	0	58340	23	58	22	58	-2.84641	-2.87279	-2.62354	-2.53125	-2.47163	0	DAZL.target
RIF1	Rif1	ENSG00000080345.13	2	152266397	152364527	79.037	0.383573	206.077	8037	98130	39	0	58982	7	5	0	0	1.97033	2.01971	-1.06879	0.288453	-0.191387	0	DAZL.target
RIMKLB	Rimklb	ENSG00000166532.11	12	8834196	8935691	99.2343	0.480839	249.2	1246	101495	5	0	58911	1	1	0	0	0.417655	0.428418	0.190027	0.600428	0.561357	0	DAZL.target
RIN2	Rin2	ENSG00000132669.8	20	19867165	19983101	50.2014	0.522805	266.1	2661	115936	10	0	58805	0	1	0	0	0.0900069	0.240375	0.323657	0.352437	0.482178	0	DAZL.target
RIPK4	Ripk4	ENSG00000183421.7	21	43159529	43187266	68.2962	0.618012	283.111	2548	27737	9	0	59056	0	3	0	1	0.249584	-0.497824	0.488862	-0.132842	0.120067	0	DAZL.target
RLF	Rlf	ENSG00000117000.8	1	40627045	40706593	67.3514	0.391396	797	5579	79548	7	0	58973	0	0	0	0	0.0218719	0.0425444	0.343993	0.621561	0.747576	0	DAZL.target
RMND5A	Rmnd5a	ENSG00000153561.8	2	86947296	87005164	85.225	0.454238	136.667	1230	57868	9	1	58960	5	20	5	13	-2.84641	-2.87279	-0.9866	-2.20812	-1.80985	1	DAZL.target
RNF10	Rnf10	ENSG00000022840.11	12	120971283	121015397	115.128	0.506818	153.733	2306	44114	15	0	59031	1	1	0	0	1.15031	1.07491	0.755891	1.08573	1.13145	0	DAZL.target
RNF11	Rnf11	ENSG00000123091.4	1	51701943	51739127	72.049	0.514734	161	483	37184	3	0	59041	0	0	0	0	-0.0171435	0.0649626	0.351966	0.728103	0.822042	0	DAZL.target
RNF114	Rnf114	ENSG00000124226.7	20	48552948	48570429	77.439	0.525833	129.333	776	17481	6	0	59165	4	1	0	1	0.219858	-0.509089	-1.23879	0.500417	-0.244244	0	DAZL.target
RNF149	Rnf149	ENSG00000163162.4	2	101887681	101925163	78.4944	0.480777	170.125	1361	37482	8	0	58996	0	3	0	0	0.350301	0.396568	0.613895	-0.0583419	0.240969	0	DAZL.target
RNF167	Rnf167	ENSG00000108523.11	17	4843303	4848517	87.1517	0.557008	147.375	1179	5214	8	1	58966	0	1	0	0	0.570771	0.583489	1.02819	0.928939	1.16361	0	DAZL.target
RNF17	Rnf17	ENSG00000132972.14	13	25338290	25454059	86.6454	0.386417	145.543	5094	115769	35	3	58912	0	4	0	0	2.40903	2.41598	2.83823	1.66466	2.1968	0	DAZL.target
RNF2	Rnf2	ENSG00000121481.6	1	185014496	185071740	96.3452	0.414362	174.5	1047	57244	6	0	59099	0	0	0	0	0.577381	0.550552	0.858188	1.06127	1.27739	0	DAZL.target
RNF220	Rnf220	ENSG00000187147.13	1	44870866	45117396	86.9758	0.578263	136.2	2043	246530	15	0	59186	0	5	0	0	0.975484	1.07744	0.951915	-0.264244	0.15285	0	DAZL.target
RNF34	Rnf34	ENSG00000170633.12	12	121837844	121868389	115.569	0.494193	222	1554	30545	7	0	58813	3	1	3	0	-1.71108	0.59964	-0.398855	0.833748	0.381304	0	DAZL.target
RNF41	Rnf41	ENSG00000181852.13	12	56598285	56615717	115.75	0.536529	197.4	987	17432	5	0	59033	1	0	1	0	-0.333069	0.494086	0.404188	1.16545	1.05137	0	DAZL.target
RNF6	Rnf6	ENSG00000127870.12	13	26706253	26796791	100.421	0.436509	524.75	2099	90538	4	1	58966	0	3	0	0	0.444826	0.429516	1.00324	0.18575	0.547101	0	DAZL.target
RNFT1	Rnft1	ENSG00000189050.10	17	58029601	58042122	62.8205	0.394169	153.667	1383	12521	9	2	58859	0	5	0	0	0.698415	0.73239	1.38462	0.144617	0.568148	1	DAZL.target
RNMT	Rnmt	ENSG00000101654.13	18	13726659	13764557	69.9134	0.382261	151.1	1511	37898	10	0	59113	1	5	0	0	0.590556	0.610616	0.24895	-0.455802	-0.207787	0	DAZL.target
ROCK1	Rock1	ENSG00000067900.6	18	18526867	18691812	75.0149	0.375328	129.182	4263	164945	33	0	58864	4	38	4	38	-1.16567	-2.87279	-0.233406	-2.53125	-2.29883	0	DAZL.target
ROCK2	Rock2	ENSG00000134318.9	2	11319887	11488456	83.6763	0.394698	132.424	4370	168569	33	0	59089	1	10	1	6	0.972417	-1.56004	1.04347	-0.691762	-0.137119	0	DAZL.target
RPA1	Rpa1	ENSG00000132383.7	17	1732996	1803376	82.3115	0.478892	119.625	1914	70380	16	0	58833	1	4	0	0	0.885259	0.940647	0.419358	-0.0326806	0.165297	0	DAZL.target
RPA2	Rpa2	ENSG00000117748.5	1	28218035	28241257	75.2312	0.489663	129.111	1162	23222	9	0	59059	0	6	0	0	0.385369	0.44083	0.628371	-0.727355	-0.324048	0	DAZL.target
RPL10L	Rpl10l	ENSG00000165496.3	14	47120222	47121028	98.6331	0.532209	651	651	806	1	0	58869	0	0	0	0	-0.0116367	-0.0132785	0.462964	0.732658	0.856819	0	DAZL.target
RPL18	Rpl18	ENSG00000063177.8	19	49118585	49122793	73.1857	0.57807	166	1162	4208	7	1	58895	0	2	0	0	0.359293	0.408837	0.83819	0.463298	0.707033	0	DAZL.target
RPL37A	Rpl37a	ENSG00000197756.5	2	217362912	217443903	60.8852	0.514001	68.6	343	80991	5	0	59112	0	4	0	0	0.0593652	0.197531	0.355753	-0.485016	-0.208652	0	DAZL.target
RPRD2	Rprd2	ENSG00000163125.11	1	150335567	150449042	66.8158	0.448055	403.818	4442	113475	11	0	58965	0	1	0	0	0.284858	0.35519	0.493616	0.441066	0.629041	0	DAZL.target
RPS21	Rps21	ENSG00000171858.13	20	60962172	60963576	61.9909	0.502028	99.4	497	1404	5	0	59032	0	8	0	0	0.0118027	0.101802	0.358423	-1.29786	-0.893236	0	DAZL.target
RPS26	Rps26	ENSG00000197728.5	12	56435637	56438116	85.182	0.520683	93	372	2479	4	0	58908	0	1	0	1	0.205846	-0.554428	0.554914	0.517151	0.707285	0	DAZL.target
RPS27L	Rps27l	ENSG00000185088.8	15	63418071	63450220	82.2545	0.424767	99.5	398	32149	4	0	58950	0	5	0	1	0.306062	-0.45676	0.630157	-0.5638	-0.169561	0	DAZL.target
RPS3	Rps3	ENSG00000149273.10	11	75110530	75133324	91.3597	0.500616	138.429	969	22794	7	0	59019	0	5	0	2	0.442595	-1.01026	0.727538	-0.453839	-0.0599383	0	DAZL.target
RRAS2	Rras2	ENSG00000133818.8	11	14299472	14386052	91.115	0.459268	111.167	667	86580	6	0	59064	0	4	0	3	0.485063	-1.53593	0.746769	-0.229889	0.142323	0	DAZL.target
RRP8	Rrp8	ENSG00000132275.6	11	6616305	6624850	65.7801	0.558645	209	1463	8545	7	0	58972	2	1	1	0	-0.818478	0.159903	-0.598155	0.410357	0.0421351	0	DAZL.target
RSPRY1	Rspry1	ENSG00000159579.9	16	57220049	57274387	106.873	0.440244	129.786	1817	54338	14	0	59054	8	3	8	1	-2.84641	0.277179	-1.68484	0.409656	-0.468269	0	DAZL.target
RSRC2	Rsrc2	ENSG00000111011.13	12	122989190	123011547	93.2857	0.416753	112.154	1458	22357	13	0	58855	0	2	0	0	0.949403	0.919315	1.09003	0.571149	0.927194	0	DAZL.target
RTCA	Rtca	ENSG00000137996.8	1	100731763	100758325	83.9633	0.44887	106.455	1171	26562	11	0	59124	0	1	0	0	0.672375	0.693267	0.857948	0.737724	0.992305	0	DAZL.target
RTKN2	Rtkn2	ENSG00000182010.6	10	63942794	64028466	66.6884	0.416501	158.75	1905	85672	12	0	58727	4	0	4	0	-2.43617	0.657327	-1.04329	0.999124	0.12334	0	DAZL.target
RTN3	Rtn3	ENSG00000133318.9	11	63448918	63527363	108.11	0.456826	345.9	3459	78445	10	0	59011	0	2	0	1	0.721163	-0.12956	0.968006	0.463321	0.795883	0	DAZL.target
RTN4	Rtn4	ENSG00000115310.13	2	55199325	55339757	74.3564	0.421644	345.667	3111	140432	9	0	59048	0	2	0	0	0.385733	0.443692	0.596407	0.163935	0.433872	0	DAZL.target
S100PBP	S100pbp	ENSG00000116497.13	1	33282368	33324476	82.086	0.461348	251.4	1257	42108	5	0	58786	0	1	0	1	0.205816	-0.54773	0.540082	0.463218	0.665318	0	DAZL.target
SAE1	Sae1	ENSG00000142230.7	19	47616531	47713886	122.534	0.490677	132.875	1063	97355	8	0	59172	0	17	0	10	0.936807	-2.87279	1.19673	-1.88481	-1.13146	0	DAZL.target
SAFB	Safb	ENSG00000160633.8	19	5623046	5668489	71.6779	0.523291	120.737	2294	45443	19	0	58851	0	4	0	0	0.87094	0.952546	0.901731	-0.0416343	0.324398	0	DAZL.target
SALL1	Sall1	ENSG00000103449.7	16	51169886	51185278	66.3965	0.567644	1336	4008	15392	3	0	58572	0	0	0	0	-0.539656	-0.468645	-0.0668213	0.290582	0.31065	0	DAZL.target
SALL4	Sall4	ENSG00000101115.8	20	50400581	50419059	82.6221	0.59155	796.5	3186	18478	4	0	59099	0	2	0	0	-0.124425	-0.119254	0.284238	-0.0879244	0.102247	0	DAZL.target
SAMD11	Samd11	ENSG00000187634.6	1	860260	879955	47.9328	0.655581	169.5	1695	19695	10	0	59123	4	26	0	0	0.259078	0.334628	-1.30232	-2.53125	-2.47163	0	DAZL.target
SAMD4B	Samd4b	ENSG00000179134.10	19	39833036	39876350	70.0948	0.59296	181.25	2175	43314	12	0	59031	0	0	0	0	0.473713	0.532416	0.635866	0.981421	1.10795	0	DAZL.target
SAMHD1	Samhd1	ENSG00000101347.7	20	35518632	35580246	109.672	0.414201	117.059	1990	61614	17	0	59127	15	19	3	6	-1.00644	-2.19444	-2.62354	-1.90938	-2.02654	0	DAZL.target
SAR1A	Sar1a	ENSG00000079332.10	10	71907045	71930279	98.0167	0.435192	98.5714	690	23234	7	0	59017	0	0	0	0	0.641735	0.610339	0.912304	1.13033	1.34741	0	DAZL.target
SARNP	Sarnp	ENSG00000205323.4	12	56146247	56211540	78.3027	0.430341	75.4545	830	65293	11	0	59065	0	0	0	0	0.698499	0.755151	0.849249	1.09815	1.29611	0	DAZL.target
SART3	Sart3	ENSG00000075856.7	12	108916357	108955176	108.212	0.506751	165	3135	38819	19	0	58884	0	1	0	0	1.24399	1.18755	1.30378	1.11052	1.42855	0	DAZL.target
SAV1	Sav1	ENSG00000151748.10	14	51098776	51135049	71.6092	0.449627	216.667	1300	36273	6	0	59017	1	1	0	0	0.177351	0.232799	-0.0429396	0.436402	0.352627	0	DAZL.target
SBK1	Sbk1	ENSG00000188322.4	16	28303840	28335170	72.8371	0.639419	431	1293	31330	3	0	58084	0	0	0	0	-0.015324	0.0197407	0.338231	0.68707	0.76812	0	DAZL.target
SBNO1	Sbno1	ENSG00000139697.7	12	123773656	123849390	103.568	0.415663	142.31	4127	75734	29	0	59084	2	9	0	4	1.82481	-0.799835	0.664212	-0.469654	-0.05274	0	DAZL.target
SCAF11	Scaf11	ENSG00000139218.13	12	46312914	46385903	78.9095	0.370561	322.929	4521	72989	14	0	59019	0	0	0	0	0.800007	0.767305	0.91668	1.10452	1.3354	0	DAZL.target
SCAMP4	Scamp4	ENSG00000227500.5	19	1905213	1926016	36.641	0.61814	265.857	1861	20803	7	0	58878	0	1	0	0	-0.168283	-0.0469571	0.171429	0.253664	0.333007	0	DAZL.target
SCAPER	Scaper	ENSG00000140386.8	15	76640526	77197785	59.5629	0.434949	142.258	4410	557259	31	2	58970	1	0	1	0	1.09535	2.21459	1.45947	2.10917	2.07042	0	DAZL.target
SDC4	Sdc4	ENSG00000124145.5	20	43953928	43977064	59.5949	0.562211	125.4	627	23136	5	0	58811	2	0	0	0	-0.0170246	0.08718	-0.686293	0.728345	0.205231	0	DAZL.target
SDE2	Sde2	ENSG00000143751.9	1	226170403	226187032	95.4015	0.516544	199.714	1398	16629	7	0	59167	0	1	0	1	0.433897	-0.36294	0.736104	0.644482	0.870417	0	DAZL.target
SDHC	Sdhc	ENSG00000143252.10	1	161284047	161332984	99.8122	0.504826	108.833	653	48937	6	0	59072	1	6	0	0	0.519752	0.516697	0.27542	-0.603775	-0.325469	0	DAZL.target
SEC11A	Sec11a	ENSG00000140612.9	15	85212775	85259947	69.539	0.425657	105.667	634	47172	6	2	58888	1	1	0	0	0.577312	0.640825	0.766359	1.18868	1.14977	0	DAZL.target
SEC23A	Sec23a	ENSG00000100934.10	14	39501123	39578850	88.7374	0.431505	130.444	2348	77727	18	0	59221	6	10	5	9	-2.42949	-2.87279	-1.23893	-1.03164	-1.06612	0	DAZL.target
SEC23B	Sec23b	ENSG00000101310.10	20	18488137	18542059	104.959	0.469356	127.263	2418	53922	19	0	58924	2	9	0	2	1.29494	-0.200041	0.331738	-0.728551	-0.37011	0	DAZL.target
SEC23IP	Sec23ip	ENSG00000107651.8	10	121652223	121702014	94.608	0.434527	176.056	3169	49791	18	0	58898	2	3	1	2	0.207827	-0.371125	0.175606	0.370037	0.365083	0	DAZL.target
SENP1	Senp1	ENSG00000079387.9	12	48436681	48500091	66.1566	0.42583	116.789	2219	63410	19	0	58783	1	9	1	0	0.0321302	1.02547	0.424342	-1.01714	-0.601359	0	DAZL.target
SERBP1	Serbp1	ENSG00000142864.10	1	67873493	67896098	98.7768	0.485064	159.375	1275	22605	8	0	59167	0	1	0	0	0.582241	0.556948	0.855515	0.731442	0.984159	0	DAZL.target
SERINC3	Serinc3	ENSG00000132824.9	20	43124862	43150750	69.3287	0.494282	149.8	1498	25888	10	0	59211	7	2	0	1	0.353508	-0.356528	-2.08056	0.227114	-0.816036	0	DAZL.target
SERPINE2	Serpine2	ENSG00000135919.8	2	224839829	224904036	67.7442	0.470505	142.444	1282	64207	9	0	59049	0	2	0	0	0.335611	0.427188	0.563976	0.195648	0.43815	0	DAZL.target
SERPINH1	Serpinh1	ENSG00000149257.9	11	75273101	75283828	60.1271	0.594223	325	1300	10727	4	0	58559	0	2	0	0	-0.153423	-0.0746536	0.22307	-0.0718631	0.0907905	0	DAZL.target
SERTAD3	Sertad3	ENSG00000167565.8	19	40946751	40950612	69.5073	0.590301	597	597	3861	1	0	58668	0	0	0	0	-0.289901	-0.210922	0.160433	0.529945	0.581967	0	DAZL.target
SERTAD4	Sertad4	ENSG00000082497.7	1	210406144	210419976	97.0214	0.473055	363	1089	13832	3	0	58916	0	0	0	0	0.193559	0.172442	0.60333	0.866944	1.02545	0	DAZL.target
SESN3	Sesn3	ENSG00000149212.6	11	94898704	94965705	77.7253	0.432548	156.7	1567	67001	10	0	59090	0	1	0	0	0.554537	0.598611	0.749012	0.636888	0.877008	0	DAZL.target
SETD3	Setd3	ENSG00000183576.8	14	99864083	99947216	94.416	0.457035	157.167	1886	83133	12	0	59085	0	3	0	1	0.815934	0.0408582	0.968061	0.204229	0.574141	0	DAZL.target
SETDB1	Setdb1	ENSG00000143379.8	1	150898739	150937213	91.652	0.489316	197.273	4340	38474	22	0	58982	1	3	1	0	0.24885	1.15028	0.623153	0.403623	0.570873	0	DAZL.target
SF1	Sf1	ENSG00000168066.16	11	64532078	64546258	98.6246	0.561805	169.462	2203	14180	13	0	58977	0	2	0	2	0.816664	-0.681129	0.984279	0.538713	0.846503	0	DAZL.target
SF3A1	Sf3a1	ENSG00000099995.14	22	30727977	30752936	106.79	0.539656	160.6	2409	24959	15	1	59129	1	1	0	0	1.16397	1.11324	0.958539	1.29269	1.33601	0	DAZL.target
SF3B1	Sf3b1	ENSG00000115524.11	2	198254508	198299815	86.2129	0.424931	159.115	4137	45307	26	0	58979	0	1	0	0	1.42759	1.42853	1.32929	1.12679	1.4553	0	DAZL.target
SF3B3	Sf3b3	ENSG00000189091.8	16	70557691	70608820	110.691	0.490992	152.16	3804	51129	25	0	58938	0	2	0	1	1.58515	0.746757	1.52965	0.972523	1.37509	0	DAZL.target
SFMBT2	Sfmbt2	ENSG00000198879.7	10	7200586	7453450	94.2803	0.499824	142	2840	252864	20	0	59037	2	1	2	1	-0.404954	0.592675	0.196015	1.00802	0.793142	0	DAZL.target
SFPQ	Sfpq	ENSG00000116560.6	1	35641979	35658749	93.9385	0.461179	150	1350	16770	9	0	58847	0	5	0	4	0.613226	-2.00014	0.861547	-0.366458	0.060092	0	DAZL.target
SFR1	Sfr1	ENSG00000156384.10	10	105881816	105886143	58.4043	0.355055	313.667	941	4327	3	0	58793	1	1	0	0	0.0752838	0.0934335	-0.0837304	0.330661	0.263897	0	DAZL.target
SGPL1	Sgpl1	ENSG00000166224.12	10	72575717	72640930	104.144	0.459104	125.533	1883	65213	15	0	58739	1	2	1	1	0.194423	0.293646	0.673213	0.681449	0.805424	0	DAZL.target
SGPP1	Sgpp1	ENSG00000126821.7	14	64150932	64194757	52.3645	0.487839	448	1344	43825	3	0	58791	0	1	0	0	-0.342669	-0.211794	0.0901133	0.118354	0.22038	0	DAZL.target
SGSM3	Sgsm3	ENSG00000100359.16	22	40766595	40806293	68.3147	0.597391	129.381	2717	39698	21	0	59091	0	3	0	0	0.962199	1.0338	0.938812	0.2622	0.580753	0	DAZL.target
SGTA	Sgta	ENSG00000104969.5	19	2754712	2783369	61.6771	0.59885	100.2	1002	28657	10	0	58999	1	0	0	0	0.353582	0.443898	0.0137731	0.923866	0.711421	0	DAZL.target
SH2B1	Sh2b1	ENSG00000178188.10	16	28857921	28885526	81.6153	0.620294	281	2529	27605	9	5	58827	24	21	0	0	1.11566	1.03818	-2.62354	-0.600147	-1.22149	1	DAZL.target
SH3BP4	Sh3bp4	ENSG00000130147.11	2	235860617	235964358	76.0546	0.586385	729	2916	103741	4	0	58884	0	0	0	0	-0.12753	-0.056505	0.232709	0.572798	0.644943	0	DAZL.target
SHC1	Shc1	ENSG00000160691.14	1	154934774	154946871	121.489	0.575081	166.583	1999	12097	12	0	58852	0	39	0	17	1.06138	-2.87279	1.27636	-2.53125	-2.41217	0	DAZL.target
SHCBP1L	Shcbp1l	ENSG00000157060.10	1	182869000	182922660	64.4801	0.400593	225.2	2252	53660	10	0	58919	1	0	1	0	-0.490936	0.465609	0.101746	0.909494	0.758485	0	DAZL.target
SHMT1	Shmt1	ENSG00000176974.13	17	18231187	18266856	91.6556	0.546114	184.091	2025	35669	11	2	59124	7	3	5	2	-2.64875	-0.546013	-1.10962	0.817226	-0.00310564	1	DAZL.target
SHMT2	Shmt2	ENSG00000182199.6	12	57623110	57628718	85.552	0.573061	141.917	1703	5608	12	0	58977	1	0	0	0	0.643134	0.649012	0.28327	1.11782	0.966729	0	DAZL.target
SIK3	Sik3	ENSG00000160584.11	11	116714118	116969153	99.5294	0.528741	176.182	3876	255035	22	0	59160	10	9	1	5	0.487569	-1.60887	-2.11111	-0.759748	-1.20929	0	DAZL.target
SIN3B	Sin3b	ENSG00000127511.5	19	16940211	16991164	65.0797	0.59082	189.889	3418	50953	18	0	59074	0	1	0	0	0.707655	0.77885	0.758291	0.724615	0.921356	0	DAZL.target
SIPA1	Sipa1	ENSG00000213445.4	11	65405568	65418401	65.0062	0.62636	178.615	2322	12833	13	0	59027	0	0	0	0	0.511369	0.551591	0.654933	1.00365	1.12666	0	DAZL.target
SIPA1L2	Sipa1l2	ENSG00000116991.6	1	232533711	232697304	103.009	0.528378	252.143	5295	163593	21	0	58798	0	2	0	1	1.25112	0.467604	1.2111	0.722978	1.06926	0	DAZL.target
SIPA1L3	Sipa1l3	ENSG00000105738.6	19	38397868	38699012	88.5644	0.617086	279.789	5316	301144	19	0	58826	1	0	1	0	0.222798	1.19969	0.477483	1.25932	1.13787	0	DAZL.target
SIRT1	Sirt1	ENSG00000096717.7	10	69644427	69678147	82.8227	0.405806	210.889	1898	33720	9	0	58924	1	1	0	0	0.559605	0.547973	0.258482	0.645315	0.630583	0	DAZL.target
SKI	Ski	ENSG00000157933.9	1	2160134	2241558	72.5746	0.660296	339	2034	81424	6	0	58817	3	14	1	6	-0.667129	-2.87279	-0.92119	-2.10177	-1.83285	0	DAZL.target
SLAIN1	Slain1	ENSG00000139737.17	13	78272023	78338377	79.1023	0.465902	185.286	1297	66354	7	0	58989	1	0	0	0	0.327292	0.382226	0.0618689	0.89884	0.731485	0	DAZL.target
SLC16A1	Slc16a1	ENSG00000155380.7	1	113454469	113499635	87.3813	0.455451	397.75	1591	45166	4	0	59176	1	14	0	9	0.15022	-2.87279	-0.0102702	-2.1081	-1.61337	0	DAZL.target
SLC20A1	Slc20a1	ENSG00000144136.6	2	113403434	113421404	114.663	0.463141	189.667	2276	17970	12	0	58870	0	1	0	1	0.984723	0.0971175	1.20527	0.993334	1.3116	0	DAZL.target
SLC23A2	Slc23a2	ENSG00000089057.10	20	4833002	4990939	104.331	0.508257	137.933	2069	157937	15	0	59059	0	4	0	1	1.1025	0.340041	1.15856	0.113325	0.544035	0	DAZL.target
SLC24A5	Slc24a5	ENSG00000188467.6	15	48413169	48434869	86.68	0.431656	180.333	1623	21700	9	0	58968	1	0	1	0	-0.351191	0.549133	0.268222	1.0462	0.925203	0	DAZL.target
SLC25A22	Slc25a22	ENSG00000177542.6	11	790475	798316	49.3156	0.619076	146.111	1315	7841	9	0	58623	1	5	1	3	-0.765872	-1.82355	-0.139462	-0.665326	-0.547308	0	DAZL.target
SLC25A33	Slc25a33	ENSG00000171612.6	1	9599541	9645237	82.8333	0.439565	157.667	946	45696	6	0	58947	1	3	0	2	0.367621	-1.0666	0.121758	-0.0532234	0.0511899	0	DAZL.target
SLC25A39	Slc25a39	ENSG00000013306.11	17	42396993	42402238	58.3637	0.612446	113.909	1253	5245	11	3	58730	0	3	0	3	0.812476	-1.19486	1.73712	1.10209	1.37151	0	DAZL.target
SLC30A1	Slc30a1	ENSG00000170385.9	1	211744910	211752084	69.9016	0.537813	768	1536	7174	2	0	59071	0	0	0	0	-0.353015	-0.274757	0.115703	0.473148	0.526784	0	DAZL.target
SLC30A7	Slc30a7	ENSG00000162695.7	1	101361632	101447309	99.3279	0.429139	108.818	1197	85677	11	0	59100	3	0	1	0	0.0153256	0.913726	-0.324978	1.25565	0.669746	0	DAZL.target
SLC35F3	Slc35f3	ENSG00000183780.8	1	234040679	234460262	99.4645	0.546938	177.778	1600	419583	9	0	58886	1	0	1	0	-0.0348716	0.972694	0.366352	1.10825	0.992689	0	DAZL.target
SLC35F5	Slc35f5	ENSG00000115084.8	2	114462588	114514400	70.8512	0.424971	106.312	1701	51812	16	0	58993	1	3	0	1	0.854729	0.134082	0.390492	0.184504	0.325297	0	DAZL.target
SLC39A6	Slc39a6	ENSG00000141424.8	18	33688495	33709348	113.013	0.413661	259.222	2333	20853	9	0	58975	0	4	0	0	0.855088	0.731306	1.132	0.0291777	0.48514	0	DAZL.target
SLC3A2	Slc3a2	ENSG00000168003.12	11	62623518	62656352	101.489	0.560907	176.7	1767	32834	10	0	58920	0	2	0	0	0.699334	0.665061	0.920634	0.476189	0.776355	0	DAZL.target
SLC4A1AP	Slc4a1ap	ENSG00000163798.9	2	27886338	27917840	91.8608	0.432405	184.538	2399	31502	13	0	59144	0	7	0	0	0.825951	0.797589	0.987307	-0.673441	-0.158698	0	DAZL.target
SLC5A3	Slc5a3	ENSG00000272962.1	21	35445870	35478561	66.0055	0.522288	1107	2214	32691	2	0	58944	0	2	0	0	-0.49036	-0.384468	-0.00876523	-0.363897	-0.220639	0	DAZL.target
SLC5A3	Slc5a3	ENSG00000198743.5	21	35445870	35478559	66.0055	0.522288	1107	2214	32689	2	0	58944	0	2	0	0	-0.490361	-0.38447	-0.00876524	-0.363897	-0.220639	0	DAZL.target
SLC7A1	Slc7a1	ENSG00000139514.8	13	30083547	30169825	80.0407	0.547821	177.818	1956	86278	11	0	58882	2	4	0	1	0.523266	-0.197624	-0.30596	-0.233464	-0.267497	0	DAZL.target
SLC7A5	Slc7a5	ENSG00000103257.4	16	87863629	87903094	83.3503	0.5855	158.4	1584	39465	10	0	58857	2	7	0	1	0.528188	-0.230542	-0.275548	-0.840342	-0.694221	0	DAZL.target
SLC7A8	Slc7a8	ENSG00000092068.14	14	23594504	23652883	113.854	0.559061	152.182	1674	58379	11	0	59188	0	1	0	0	0.940069	0.877743	1.13727	0.966997	1.25498	0	DAZL.target
SLC9A3R1	Slc9a3r1	ENSG00000109062.5	17	72744791	72765492	77.8808	0.618851	199	1194	20701	6	0	58998	1	2	0	0	0.262172	0.283298	0.00576753	0.183667	0.165462	0	DAZL.target
SLK	Slk	ENSG00000065613.9	10	105726959	105788991	76.0548	0.408994	204.833	3687	62032	18	0	59060	1	4	1	0	0.0320437	0.956927	0.452721	-0.0324196	0.186544	0	DAZL.target
SLTM	Sltm	ENSG00000137776.12	15	59171244	59225852	85.1719	0.431522	162.15	3243	54608	20	0	59090	1	3	0	0	1.12986	1.13741	0.603321	0.353815	0.533139	0	DAZL.target
SMAD2	Smad2	ENSG00000175387.11	18	45357922	45457515	87.8288	0.437627	156.9	1569	99593	10	0	59011	0	4	0	2	0.678768	-0.750958	0.854913	-0.153162	0.24159	0	DAZL.target
SMAD4	Smad4	ENSG00000141646.9	18	48494410	48611415	83.3717	0.460915	155.538	2022	117005	13	0	59080	0	135	0	0	0.754968	0.814433	0.86637	-2.53125	-2.47163	0	DAZL.target
SMAD7	Smad7	ENSG00000101665.4	18	46446223	46477081	72.1361	0.518355	262.333	787	30858	3	0	59012	0	0	0	0	-0.0704822	0.00615256	0.316657	0.688455	0.77684	0	DAZL.target
SMARCD1	Smarcd1	ENSG00000066117.10	12	50478755	50494495	90.7603	0.498801	121.833	1462	15740	12	1	59045	0	2	0	0	0.863225	0.872396	1.23775	0.763972	1.09282	0	DAZL.target
SMC3	Smc3	ENSG00000108055.9	10	112327449	112364394	81.2363	0.385707	132	3828	36945	29	0	58991	0	1	0	1	1.63902	0.854467	1.46956	1.21811	1.57704	0	DAZL.target
SMC6	Smc6	ENSG00000163029.11	2	17845079	17981509	74.4975	0.374069	132	3432	136430	26	0	59022	1	11	0	0	1.5316	1.58411	0.818737	-1.04038	-0.481057	0	DAZL.target
SMCHD1	Smchd1	ENSG00000101596.10	18	2655737	2805015	46.7047	0.383528	128.438	6165	149278	48	0	58835	8	16	4	10	-0.989713	-2.74558	-1.37631	-1.4106	-1.30124	0	DAZL.target
SMG6	Smg6	ENSG00000070366.9	17	1963133	2207065	93.2235	0.529199	230.158	4373	243932	19	0	59069	1	6	0	2	1.11452	-0.278896	0.523212	-0.390393	-0.0805125	0	DAZL.target
SMG7	Smg7	ENSG00000116698.16	1	183441351	183567381	98.2335	0.481994	157.609	3625	126030	23	0	59077	2	13	0	5	1.38958	-1.65783	0.319395	-1.29135	-0.80434	0	DAZL.target
SMG8	Smg8	ENSG00000167447.8	17	57286761	57292608	108.048	0.470227	750.75	3003	5847	4	0	59100	1	11	0	0	0.190053	0.106842	0.10723	-1.66584	-1.22391	0	DAZL.target
SMNDC1	Smndc1	ENSG00000119953.8	10	112050488	112064709	75.7353	0.405053	149.4	747	14221	5	0	58879	0	0	0	0	0.300232	0.314899	0.616396	0.885388	1.05438	0	DAZL.target
SMURF2	Smurf2	ENSG00000108854.11	17	62538413	62658186	79.4698	0.426645	127.944	2303	119773	18	1	59005	0	0	0	0	1.20227	1.27108	1.39239	1.55988	1.81839	0	DAZL.target
SMYD3	Smyd3	ENSG00000185420.14	1	245912642	246670614	80.5404	0.47107	107.909	1187	757972	11	1	59207	13	33	11	20	-2.84641	-2.87279	-2.62354	-2.53125	-2.47163	1	DAZL.target
SNAI1	Snai1	ENSG00000124216.3	20	48599536	48605423	63.3178	0.615285	271	813	5887	3	0	59101	3	0	0	0	-0.109595	-0.0445146	-1.13823	0.663653	-0.106956	0	DAZL.target
SNAP23	Snap23	ENSG00000092531.5	15	42783431	42837547	73.8444	0.417518	122.75	982	54116	8	0	59082	1	1	0	0	0.458083	0.506615	0.155178	0.583868	0.542539	0	DAZL.target
SNIP1	Snip1	ENSG00000163877.9	1	38000050	38019903	116.954	0.546823	303.75	1215	19853	4	0	58932	0	7	0	4	0.483948	-2.19568	0.881545	-0.769034	-0.287344	0	DAZL.target
SNRNP200	Snrnp200	ENSG00000144028.10	2	96940074	96971297	109.883	0.526245	149.067	6708	31223	45	3	58890	8	5	3	2	0.365134	1.2663	0.200792	1.76591	1.21196	1	DAZL.target
SNRNP40	Snrnp40	ENSG00000060688.8	1	31732417	31769662	77.0475	0.484701	165.1	1651	37245	10	0	59056	1	1	1	0	-0.468916	0.489532	0.129029	0.598571	0.535595	0	DAZL.target
SNRPB	Snrpb	ENSG00000125835.13	20	2442280	2451499	90.5036	0.577168	132.857	930	9219	7	0	59201	0	15	0	0	0.442297	0.43928	0.714544	-2.00051	-1.38283	0	DAZL.target
SNRPD3	Snrpd3	ENSG00000100028.7	22	24951471	25005947	63.3	0.510595	132	660	54476	5	5	58937	0	28	0	0	0.741634	0.783301	2.43641	-1.364	-0.652668	1	DAZL.target
SNRPF	Snrpf	ENSG00000139343.6	12	96252706	96297606	81.3706	0.396485	88.6	443	44900	5	0	58991	18	27	0	0	0.4442	0.456627	-2.62354	-2.53125	-2.47163	0	DAZL.target
SNW1	Snw1	ENSG00000100603.9	14	78183942	78227550	114.46	0.45926	143.385	1864	43608	13	0	58880	1	14	0	0	1.10003	1.01921	0.737343	-1.49157	-0.870956	0	DAZL.target
SNX11	Snx11	ENSG00000002919.10	17	46180719	46200436	125.72	0.510325	124.286	870	19717	7	0	58994	2	8	1	6	-0.039727	-2.75624	0.202155	-0.680822	-0.387829	0	DAZL.target
SNX27	Snx27	ENSG00000143376.8	1	151584541	151671567	87.6005	0.422621	124.818	1373	87026	11	0	59032	0	0	0	0	0.785243	0.807748	0.934533	1.14606	1.36668	0	DAZL.target
SNX33	Snx33	ENSG00000173548.8	15	75940247	75954642	105.508	0.601841	868.5	1737	14395	2	5	58619	0	3	0	0	0.795726	0.675349	2.61962	1.86245	2.12532	0	DAZL.target
SNX5	Snx5	ENSG00000089006.12	20	17922241	17949623	94.6141	0.418002	103.25	1239	27382	12	0	59019	0	10	0	2	0.920526	-0.56798	1.07693	-1.11408	-0.502418	0	DAZL.target
SNX6	Snx6	ENSG00000129515.14	14	35030300	35099389	60.4553	0.371237	103.25	1239	69089	12	0	59176	2	11	1	9	-0.209478	-2.87279	-0.171304	-1.46688	-1.1039	0	DAZL.target
SOAT1	Soat1	ENSG00000057252.8	1	179262925	179327815	104.732	0.429148	116.2	1743	64890	15	0	59036	7	11	6	4	-2.84641	-1.44623	-1.39551	-1.10191	-1.13902	0	DAZL.target
SOCS5	Socs5	ENSG00000171150.7	2	46926091	46990268	80.576	0.435723	1617	1617	64177	1	0	59024	0	2	0	0	-0.329516	-0.238429	0.131351	-0.367146	-0.167904	0	DAZL.target
SON	Son	ENSG00000159140.13	21	34914924	34949812	70.5533	0.446317	566.143	7926	34888	14	0	59062	0	2	0	0	0.348977	0.368836	0.531859	0.188915	0.424614	0	DAZL.target
SOX13	Sox13	ENSG00000143842.10	1	204042243	204096863	48.4986	0.597854	152.615	1984	54620	13	0	58911	0	2	0	0	0.337585	0.463411	0.496265	0.19567	0.388303	0	DAZL.target
SP1	Sp1	ENSG00000185591.5	12	53773960	53810230	76.9263	0.528655	399	2394	36270	6	0	58922	0	1	0	1	0.05095	-0.691588	0.394398	0.366644	0.52808	0	DAZL.target
SP3	Sp3	ENSG00000172845.9	2	174771187	174830430	65.8049	0.482543	376.5	2259	59243	6	0	58967	0	0	0	0	-0.0199765	0.0624689	0.319559	0.678148	0.771976	0	DAZL.target
SPAST	Spast	ENSG00000021574.7	2	32288680	32382706	69.1842	0.431616	114.882	1953	94026	17	0	58946	3	9	2	0	-0.81147	0.975779	-0.484014	-1.05106	-0.880163	0	DAZL.target
SPATA2	Spata2	ENSG00000158480.6	20	48519928	48532080	83.5227	0.586852	787.5	1575	12152	2	0	58860	4	1	0	0	-0.170786	-0.141221	-1.49945	0.210409	-0.578846	0	DAZL.target
SPC25	Spc25	ENSG00000152253.4	2	169690642	169769881	74.2514	0.370355	118.5	711	79239	6	0	59078	5	2	1	0	-0.40257	0.533469	-1.35388	0.257904	-0.426067	0	DAZL.target
SPCS2	Spcs2	ENSG00000118363.7	11	74660292	74690076	54.976	0.473451	137.5	825	29784	6	0	58873	1	2	1	0	-0.899312	0.126737	-0.195781	0.0290275	-0.0174614	0	DAZL.target
SPG21	Spg21	ENSG00000090487.6	15	65255362	65282648	107.653	0.430747	122	976	27286	8	0	58958	3	6	1	1	-0.101591	-0.0439717	-0.334729	-0.436699	-0.38685	0	DAZL.target
SPINT2	Spint2	ENSG00000167642.8	19	38734675	38783254	89.0222	0.558406	139.833	839	48579	6	0	58893	3	0	0	0	0.370637	0.398658	-0.755552	0.965508	0.275795	0	DAZL.target
SPPL3	Sppl3	ENSG00000157837.11	12	121200313	121342174	61.9416	0.496043	119.2	1192	141861	10	0	59062	1	2	0	1	0.369228	-0.261034	0.00120728	0.185253	0.171935	0	DAZL.target
SPRED1	Spred1	ENSG00000166068.8	15	38544527	38649450	72.0434	0.44109	196.714	1377	104923	7	0	58826	0	2	0	2	0.304626	-1.07639	0.553857	0.151819	0.406108	0	DAZL.target
SPTBN1	Sptbn1	ENSG00000115306.11	2	54683422	54896812	87.0416	0.509988	209.194	7531	213390	36	0	58739	1	3	0	0	1.78581	1.89857	0.896764	0.673534	0.857627	0	DAZL.target
SPTSSA	Sptssa	ENSG00000165389.6	14	34901995	34931562	43.7015	0.553259	114	228	29567	2	0	58971	0	0	0	0	-0.355501	-0.201613	0.0700369	0.547803	0.565013	0	DAZL.target
SREBF1	Srebf1	ENSG00000072310.12	17	17713713	17740325	48.3688	0.64879	185.895	3532	26612	19	2	58944	2	0	1	0	0.0623018	1.04324	0.453432	1.77452	1.32488	0	DAZL.target
SREBF2	Srebf2	ENSG00000198911.7	22	42229109	42303312	84.2875	0.583694	191.444	3446	74203	18	0	59077	1	3	1	1	0.0160539	0.170313	0.420434	0.251254	0.371113	0	DAZL.target
SRP14	Srp14	ENSG00000140319.6	15	40327940	40331389	49.1813	0.517731	92.75	371	3449	4	0	58739	0	0	0	0	-0.184943	-0.0579339	0.202404	0.647646	0.697134	0	DAZL.target
SRP9	Srp9	ENSG00000143742.8	1	225965531	225978168	43.8979	0.442951	85.5	342	12637	4	0	58988	0	0	0	0	-0.147332	-0.0207644	0.24082	0.652181	0.721068	0	DAZL.target
SRRM1	Srrm1	ENSG00000133226.12	1	24958207	24999758	73.3421	0.488007	162.562	2601	41551	16	0	59003	0	1	0	1	0.707639	-0.0172369	0.811843	0.734528	0.963714	0	DAZL.target
SRRM2	Srrm2	ENSG00000167978.12	16	2802330	2822539	64.0584	0.542673	579.857	8118	20209	14	0	59155	7	17	7	14	-2.84641	-2.87279	-2.28138	-2.4265	-2.39091	0	DAZL.target
SRSF11	Srsf11	ENSG00000116754.9	1	70671365	70718735	94.5143	0.462475	141.636	1558	47370	11	0	59118	0	5	0	1	0.750412	-0.0361051	0.939298	-0.297723	0.140175	0	DAZL.target
SRSF5	Srsf5	ENSG00000100650.11	14	70193617	70238722	107.062	0.439953	127.714	894	45105	7	0	59021	0	4	0	4	0.73183	-1.90962	1.0073	-0.0426867	0.382355	0	DAZL.target
SRSF6	Srsf6	ENSG00000124193.10	20	42086568	42092245	66.4443	0.522723	175.143	1226	5677	7	0	59015	0	0	0	0	0.114809	0.186114	0.424808	0.802363	0.902402	0	DAZL.target
SRSF9	Srsf9	ENSG00000111786.4	12	120899471	120907596	76.247	0.557236	179.25	717	8125	4	0	58871	0	0	0	0	0.0644824	0.112456	0.419162	0.788196	0.888612	0	DAZL.target
SSB	Ssb	ENSG00000138385.11	2	170648443	170668574	68.0368	0.369663	111.5	1338	20131	12	0	59006	3	0	0	0	0.748643	0.76094	-0.510859	1.09942	0.486191	0	DAZL.target
SSBP3	Ssbp3	ENSG00000157216.11	1	54691105	54879152	79.1437	0.551401	73.4444	1322	188047	18	0	59031	0	3	0	3	1.06141	-0.858312	1.00171	0.277754	0.623008	0	DAZL.target
SSH2	Ssh2	ENSG00000141298.13	17	27952956	28257294	100.747	0.469768	275.688	4411	304338	16	1	59121	15	38	14	36	-2.84641	-2.87279	-2.62354	-2.53125	-2.47163	1	DAZL.target
SSRP1	Ssrp1	ENSG00000149136.3	11	57093459	57103351	129.296	0.513572	139.375	2230	9892	16	0	58763	2	8	1	5	0.463044	-1.84806	0.541256	-0.398325	-0.0535029	0	DAZL.target
SSU72	Ssu72	ENSG00000160075.10	1	1477053	1510249	74.0214	0.591863	205.6	1028	33196	5	0	59041	0	4	0	0	0.125043	0.179223	0.436171	-0.43722	-0.148129	0	DAZL.target
SSX2IP	Ssx2ip	ENSG00000117155.12	1	85109390	85156486	92.5063	0.398269	141.143	1976	47096	14	0	59032	0	4	0	3	1.02408	-1.06579	1.13144	0.050631	0.502648	0	DAZL.target
ST13	St13	ENSG00000100380.8	22	41220539	41253026	76.9941	0.464383	98.5	1182	32487	12	0	58963	0	2	0	0	0.634753	0.688274	0.799032	0.381864	0.668132	0	DAZL.target
ST3GAL4	St3gal4	ENSG00000110080.14	11	126225535	126310239	85.5086	0.565438	133.25	1599	84704	12	2	58840	0	5	0	0	0.982273	1.03062	1.55814	0.335143	0.759047	1	DAZL.target
STAM2	Stam2	ENSG00000115145.5	2	152973315	153032506	75.578	0.408759	120.857	1692	59191	14	0	59055	3	5	1	0	-0.079011	0.868291	-0.47192	-0.316055	-0.366474	0	DAZL.target
STARD7	Stard7	ENSG00000084090.9	2	96850597	96874563	67.4363	0.496988	142.375	1139	23966	8	3	58979	6	4	0	0	0.670524	0.729222	-0.716568	0.771886	0.135101	1	DAZL.target
STAT3	Stat3	ENSG00000168610.10	17	40465342	40540586	107.499	0.512943	106	2332	75244	22	0	58952	0	9	0	8	1.47482	-2.8278	1.43813	-0.623317	-0.00388099	0	DAZL.target
STAT5A	Stat5a	ENSG00000126561.12	17	40439565	40463961	67.4683	0.57521	141.118	2399	24396	17	1	58910	0	1	0	0	0.85018	0.924343	1.11874	1.03715	1.26844	0	DAZL.target
STAT6	Stat6	ENSG00000166888.6	12	57489191	57525922	78.2792	0.574007	128.048	2689	36731	21	0	58950	1	0	1	0	0.134439	1.09435	0.492367	1.3069	1.17974	0	DAZL.target
STAU1	Stau1	ENSG00000124214.15	20	47729878	47804904	82.1859	0.485545	136.786	1915	75026	14	0	59100	7	104	2	0	-0.934855	0.812024	-1.79591	-2.53125	-2.47163	0	DAZL.target
STIP1	Stip1	ENSG00000168439.12	11	63952744	63972015	101.772	0.494809	137.769	1791	19271	13	0	58867	1	5	0	1	0.89424	0.0727273	0.529534	-0.18681	0.0874215	0	DAZL.target
STK11IP	Stk11ip	ENSG00000144589.16	2	220462582	220481173	41.1274	0.603576	146.167	3508	18591	24	0	59001	0	1	0	0	0.790666	0.915554	0.775761	0.780425	0.951303	0	DAZL.target
STK17B	Stk17b	ENSG00000081320.6	2	196998290	197041227	67.6064	0.373439	165.857	1161	42937	7	0	59091	0	1	0	0	0.423329	0.447663	0.674478	0.538585	0.781372	0	DAZL.target
STK24	Stk24	ENSG00000102572.10	13	99102455	99230194	76.8806	0.482531	128.545	1414	127739	11	0	59002	0	1	0	0	0.582103	0.680119	0.724168	0.641341	0.863431	0	DAZL.target
STK4	Stk4	ENSG00000101109.7	20	43595115	43708600	83.6788	0.434114	148	1628	113485	11	0	58926	11	0	0	0	0.707895	0.75647	-2.62354	1.08712	-0.844683	0	DAZL.target
STRAP	Strap	ENSG00000023734.6	12	16035325	16056412	70.37	0.424597	111.3	1113	21087	10	0	59110	1	1	0	0	0.505978	0.552322	0.182358	0.621209	0.578485	0	DAZL.target
STRN	Strn	ENSG00000115808.7	2	37070783	37193615	89.6854	0.429991	130.059	2211	122832	17	0	59145	1	16	0	1	1.12072	0.372631	0.602795	-1.81975	-1.17831	0	DAZL.target
STRN4	Strn4	ENSG00000090372.10	19	47222764	47250251	84.6819	0.602979	129.375	2070	27487	16	0	59042	1	0	0	0	0.902639	0.914489	0.433695	1.24391	1.1122	0	DAZL.target
STX12	Stx12	ENSG00000117758.9	1	28099694	28150963	50.015	0.469934	95.7	957	51269	10	0	59003	0	0	0	0	0.238912	0.37942	0.468593	0.84442	0.94811	0	DAZL.target
STX3	Stx3	ENSG00000166900.10	11	59480929	59573354	68.0225	0.478663	169.636	1866	92425	11	0	58954	0	0	0	0	0.427341	0.526658	0.606901	0.930791	1.07119	0	DAZL.target
STX4	Stx4a	ENSG00000103496.10	16	31044210	31054296	97.1586	0.554281	104.333	939	10086	9	0	59009	28	2	28	0	-2.84641	0.62404	-2.62354	0.450759	-2.32588	0	DAZL.target
STX6	Stx6	ENSG00000135823.9	1	180941861	180992047	80.3978	0.493669	102	816	50186	8	1	59067	0	0	0	0	0.563542	0.628652	0.996366	1.26983	1.44938	0	DAZL.target
SUCO	Suco	ENSG00000094975.9	1	172501489	172580971	70.0937	0.382433	178.652	4109	79482	23	0	58989	0	0	0	0	1.22499	1.25485	1.15266	1.33492	1.58636	0	DAZL.target
SUDS3	Suds3	ENSG00000111707.7	12	118814185	118855840	57.4559	0.463554	75.3333	904	41655	12	0	58948	1	1	1	1	-0.457516	-0.210923	0.0905927	0.588598	0.507984	0	DAZL.target
SUMO1	Sumo1	ENSG00000116030.12	2	203070903	203103331	103.671	0.413382	67.2	336	32428	5	0	58942	1	2	1	2	-0.243272	-0.849071	0.432477	0.456084	0.556908	0	DAZL.target
SUMO3	Sumo3	ENSG00000184900.11	21	46225532	46238694	78.0635	0.615562	172	516	13162	3	1	59207	3	3	0	0	0.246901	0.280369	-0.618026	0.121686	-0.187675	1	DAZL.target
SUPT16H	Supt16	ENSG00000092201.5	14	21819631	21852425	92.769	0.44101	127.92	3198	32794	25	0	59023	0	5	0	0	1.46222	1.45291	1.38582	0.0763645	0.581657	0	DAZL.target
SWT1	Swt1	ENSG00000116668.8	1	185126212	185260897	73.6583	0.372646	156.167	2811	134685	18	0	58900	58	42	58	38	-2.84641	-2.87279	-2.62354	-2.53125	-2.47163	0	DAZL.target
SYCE2	Syce2	ENSG00000161860.7	19	13009600	13030090	89.5134	0.549691	118.833	713	20490	6	0	59092	1	2	0	0	0.370829	0.385889	0.131	0.282341	0.29625	0	DAZL.target
SYCP1	Sycp1	ENSG00000198765.7	1	115397424	115537991	53.236	0.337626	100.548	3117	140567	31	0	58913	6	7	4	7	-1.3052	-2.11074	-0.96626	-0.339579	-0.531548	0	DAZL.target
SYCP3	Sycp3	ENSG00000139351.10	12	102122426	102133250	90.4599	0.392839	98.125	785	10824	8	0	58973	1	1	0	0	0.711125	0.671553	0.410732	0.760717	0.777505	0	DAZL.target
SYF2	Syf2	ENSG00000117614.5	1	25549170	25558993	99.7057	0.464316	123.857	867	9823	7	0	59104	0	14	0	0	0.58386	0.54841	0.875673	-1.79411	-1.14328	0	DAZL.target
SYNE2	Syne2	ENSG00000054654.11	14	64319683	64693165	87.4679	0.427593	188.138	21824	373482	116	0	59066	6	10	1	1	2.62534	3.76298	-0.234436	0.376465	0.105666	0	DAZL.target
TAF4	Taf4	ENSG00000130699.12	20	60528525	60640866	104.484	0.534364	141.571	1982	112341	14	0	58705	0	9	0	3	1.01515	-1.04904	1.11371	-0.899908	-0.329846	0	DAZL.target
TAF4B	Taf4b	ENSG00000141384.7	18	23805900	23971649	77.1035	0.436297	179.533	2693	165749	15	0	59145	0	0	0	0	0.834065	0.915021	0.881934	1.11942	1.32183	0	DAZL.target
TAF5	Taf5	ENSG00000148835.9	10	105127724	105148822	93.1023	0.422054	190.4	1904	21098	10	0	59043	0	2	0	0	0.69945	0.658944	0.924274	0.433603	0.763002	0	DAZL.target
TAMM41	Tamm41	ENSG00000144559.6	3	11831916	11888393	101.471	0.451313	144.286	1010	56477	7	2	58864	0	10	0	4	0.928567	-1.69173	1.64256	-0.558673	0.0491459	1	DAZL.target
TANC1	Tanc1	ENSG00000115183.9	2	159825146	160089170	95.6932	0.514269	235.08	5877	264024	25	0	59176	1	10	0	2	1.43208	0.0426238	0.719721	-0.907975	-0.424111	0	DAZL.target
TAOK1	Taok1	ENSG00000160551.5	17	27717482	27878922	80.9761	0.425708	164.895	3133	161440	19	1	59008	1	2	0	1	1.25024	0.536796	0.874106	0.87001	0.998693	0	DAZL.target
TARBP1	Tarbp1	ENSG00000059588.5	1	234527059	234614849	73.1357	0.409259	141.69	4109	87790	29	0	58988	3	2	1	1	0.584826	0.77405	-0.0886676	0.793936	0.51238	0	DAZL.target
TARDBP	Tardbp	ENSG00000120948.11	1	11072414	11085796	90.2408	0.431311	222.333	1334	13382	6	0	59068	0	3	0	0	0.408684	0.384534	0.726876	-0.0115968	0.326435	0	DAZL.target
TASP1	Tasp1	ENSG00000089123.11	20	13246709	13619587	82.7439	0.487472	103.154	1341	372878	13	0	59142	3	15	2	2	-0.745164	-0.353786	-0.500281	-1.89915	-1.50412	0	DAZL.target
TBC1D10B	Tbc1d10b	ENSG00000169221.9	16	30368423	30381585	40.2502	0.602457	186.875	1495	13162	8	0	58667	0	0	0	0	-0.0547307	0.0678151	0.252932	0.702082	0.740575	0	DAZL.target
TBC1D20	Tbc1d20	ENSG00000125875.9	20	416124	443197	69.6928	0.528684	169.143	1184	27073	7	0	59098	2	8	0	1	0.165903	-0.541557	-0.537153	-1.22409	-1.07421	0	DAZL.target
TBC1D2B	Tbc1d2b	ENSG00000167202.7	15	78276378	78370066	48.4477	0.495444	207.5	2905	93688	14	2	58965	0	4	0	4	0.612104	-1.83615	1.21761	0.319323	0.637164	0	DAZL.target
TCF12	Tcf12	ENSG00000140262.13	15	57210821	57591479	89.0949	0.45851	116.1	2322	380658	20	0	59126	1	2	1	1	0.496479	0.748813	0.686093	0.673468	0.799505	0	DAZL.target
TCF3	Tcf3	ENSG00000071564.10	19	1609291	1652604	32.3257	0.665068	150.625	2410	43313	16	0	59004	0	0	0	0	0.470591	0.586841	0.56993	0.968424	1.04436	0	DAZL.target
TCF4	Tcf4	ENSG00000196628.9	18	52889562	53332018	114.026	0.492783	128.579	2443	442456	19	0	58921	0	3	0	2	1.64875	0.23555	1.47735	0.574829	1.03093	0	DAZL.target
TCF7L2	Tcf7l2	ENSG00000148737.11	10	114710009	114927437	77.1572	0.535534	128.588	2186	217428	17	0	59056	5	4	5	4	-2.6358	-1.52368	-1.19668	-0.0670145	-0.523697	0	DAZL.target
TCFL5	Tcfl5	ENSG00000101190.8	20	61472467	61493115	93.513	0.463599	223.833	1343	20648	6	0	59040	1	3	0	1	0.39177	-0.407937	0.180618	-0.00663332	0.105879	0	DAZL.target
TDRD1	Tdrd1	ENSG00000095627.5	10	115939029	115992063	77.0112	0.395963	148.92	3723	53034	25	0	58916	1	0	1	0	0.460958	1.38932	0.73873	1.44057	1.39108	0	DAZL.target
TDRD5	Tdrd5	ENSG00000162782.11	1	179560748	179660407	95.8103	0.43259	190.125	3042	99659	16	0	59075	2	3	1	1	0.145866	0.260909	0.127545	0.319566	0.310244	0	DAZL.target
TDRD9	Tdrd9	ENSG00000156414.14	14	104394799	104519004	52.6614	0.452007	115.4	4039	124205	35	0	58978	1	7	1	7	0.574863	-2.24963	0.687973	-0.400905	-0.0527235	0	DAZL.target
TDRKH	Tdrkh	ENSG00000182134.11	1	151742583	151763892	116.928	0.475019	142.077	1847	21309	13	0	58960	3	8	2	0	-0.599634	1.00156	-0.115126	-0.60839	-0.418488	0	DAZL.target
TEAD1	Tead1	ENSG00000187079.10	11	12695969	12966298	116.304	0.482718	126.182	1388	270329	11	0	59069	2	3	2	0	-0.546315	1.16129	0.238942	0.389865	0.396193	0	DAZL.target
TEX14	Tex14	ENSG00000121101.11	17	56634039	56769416	96.157	0.465192	146.839	4552	135377	31	0	58978	14	1	13	1	-2.84641	1.00683	-2.62354	1.30202	-0.596194	0	DAZL.target
TFAM	Tfam	ENSG00000108064.6	10	60144782	60158981	71.3803	0.405709	128.286	898	14199	7	0	58855	0	0	0	0	0.377936	0.405179	0.650651	0.92315	1.09414	0	DAZL.target
TFDP1	Tfdp1	ENSG00000198176.8	13	114239013	114295785	79.3456	0.496905	155.6	1556	56772	10	0	58955	1	3	0	2	0.475472	-0.929571	0.148968	0.00601463	0.0971722	0	DAZL.target
TGIF1	Tgif1	ENSG00000177426.16	18	3411606	3458409	88.6836	0.504631	292.8	1464	46803	5	0	58968	3	7	0	1	0.215103	-0.547052	-0.848751	-1.01482	-1.01031	0	DAZL.target
TGIF2	Tgif2	ENSG00000118707.5	20	35201891	35222353	91.9111	0.576519	281	843	20462	3	0	59106	8	1	0	0	0.161186	0.162563	-2.38725	0.478243	-0.896586	0	DAZL.target
TGOLN2	Tgoln1	ENSG00000152291.9	2	85545147	85555548	88.7469	0.532441	372.75	1491	10401	4	1	58937	1	4	0	0	0.238744	0.248886	0.284789	-0.14205	0.00389365	1	DAZL.target
THAP11	Thap11	ENSG00000168286.1	16	67876213	67878097	113.153	0.632353	951	951	1884	1	0	58804	0	0	0	0	0.191873	0.114475	0.653476	0.83838	0.988897	0	DAZL.target
THRAP3	Thrap3	ENSG00000054118.9	1	36690017	36770958	99.2884	0.480771	292.8	2928	80941	10	0	58902	0	0	0	0	0.622444	0.601009	0.852222	1.09028	1.28773	0	DAZL.target
THUMPD1	Thumpd1	ENSG00000066654.8	16	20744986	20753406	97.5987	0.473663	335.5	1342	8420	4	0	58954	1	1	0	0	0.255781	0.223837	0.111779	0.532892	0.481735	0	DAZL.target
TIMM8B	Timm8b	ENSG00000150779.7	11	111955524	111957522	41.7881	0.569467	153.5	307	1998	2	1	58897	1	1	0	0	-0.255248	-0.109635	-0.152521	0.452214	0.271618	0	DAZL.target
TIPIN	Tipin	ENSG00000075131.5	15	66628544	66679084	77.1631	0.402658	137.143	960	50540	7	1	59149	1	1	1	0	-0.30228	0.637407	0.514621	0.883058	0.880139	0	DAZL.target
TJP1	Tjp1	ENSG00000104067.12	15	29991571	30261068	96.4012	0.443875	201.519	5441	269497	27	1	58872	0	12	0	7	1.78544	-2.07241	1.75244	-0.803996	-0.0819219	1	DAZL.target
TLE3	Tle3	ENSG00000140332.11	15	70340129	70390515	52.1618	0.576169	133.6	2672	50386	20	0	59113	0	0	0	0	0.717376	0.843794	0.742094	1.10324	1.22853	0	DAZL.target
TLK1	Tlk1	ENSG00000198586.9	2	171847333	172087824	89.4179	0.403544	112.455	2474	240491	22	0	58998	2	2	1	1	0.616118	0.811748	0.368641	0.77743	0.721794	0	DAZL.target
TLK2	Tlk2	ENSG00000146872.13	17	60536019	60692842	62.6722	0.429124	113.286	2379	156823	21	0	58742	3	5	3	5	-1.33926	-1.88589	-0.419864	-0.24613	-0.30651	0	DAZL.target
TM2D1	Tm2d1	ENSG00000162604.8	1	62146718	62191095	43.301	0.410082	150.167	901	44377	6	0	59039	0	1	0	0	0.0148576	0.134704	0.34457	0.331275	0.485668	0	DAZL.target
TM7SF3	Tm7sf3	ENSG00000064115.6	12	27126128	27167367	60.5944	0.453605	149.917	1799	41239	12	0	59123	1	0	0	0	0.423688	0.513104	0.0786881	0.939133	0.76319	0	DAZL.target
TM9SF2	Tm9sf2	ENSG00000125304.8	13	100153671	100216260	89.7094	0.415059	123.176	2094	62589	17	0	59103	0	0	0	0	1.12856	1.12726	1.1701	1.34022	1.59898	0	DAZL.target
TM9SF3	Tm9sf3	ENSG00000077147.10	10	98277866	98347209	73.5471	0.379205	125.143	1752	69343	14	0	59103	1	2	1	0	-0.0122632	0.92249	0.444917	0.470295	0.570156	0	DAZL.target
TM9SF4	Tm9sf4	ENSG00000101337.11	20	30697309	30755061	79.0156	0.522286	105.8	2116	57752	20	0	58972	0	4	0	4	1.02972	-1.48859	1.02535	0.0521279	0.441862	0	DAZL.target
TMBIM6	Tmbim6	ENSG00000139644.8	12	50101508	50158717	110.194	0.465719	94.5	945	57209	10	1	59042	0	2	0	1	1.07342	0.252321	1.47297	0.9172	1.2993	0	DAZL.target
TMCC3	Tmcc3	ENSG00000057704.6	12	94960900	95044338	91.1701	0.530046	458	1374	83438	3	1	59001	0	0	0	0	0.226031	0.271849	0.796172	1.05658	1.20592	0	DAZL.target
TMCO1	Tmco1	ENSG00000143183.12	1	165696032	165796992	65.1612	0.426847	112.167	673	100960	6	0	58876	1	1	1	1	-0.649937	-0.418258	-0.0171552	0.454969	0.377193	0	DAZL.target
TMED2	Tmed2	ENSG00000086598.6	12	124069078	124083116	75.3021	0.475021	157.5	630	14038	4	0	58788	0	1	0	0	0.0959063	0.146896	0.454372	0.419767	0.598965	0	DAZL.target
TMEM101	Tmem101	ENSG00000091947.5	17	42088556	42101314	58.086	0.599828	211.25	845	12758	4	3	58806	0	2	0	0	0.338376	0.406018	1.43247	1.12426	1.30323	0	DAZL.target
TMEM123	Tmem123	ENSG00000152558.10	11	102267063	102341115	105.674	0.468135	131.4	657	74052	5	0	58937	3	6	3	2	-1.82408	-0.914031	-0.53086	-0.581059	-0.573057	0	DAZL.target
TMEM135	Tmem135	ENSG00000166575.12	11	86748886	87034800	82.1015	0.418177	611.133	9167	285914	15	0	59079	5	6	5	3	-2.81817	-1.23036	-1.35681	-0.664703	-0.939622	0	DAZL.target
TMEM167B	Tmem167b	ENSG00000215717.5	1	109632425	109639556	139.913	0.497704	81	243	7131	3	0	59043	8	7	1	0	-0.0619551	0.669236	-1.6225	-0.429782	-0.851539	0	DAZL.target
TMEM170A	Tmem170	ENSG00000166822.8	16	75476952	75499395	62.8426	0.531423	163.333	490	22443	3	0	58154	1	7	0	0	-0.129855	-0.0292583	-0.287055	-1.22691	-1.01993	0	DAZL.target
TMEM19	Tmem19	ENSG00000139291.9	12	72079867	72097836	119.49	0.428714	182.5	1095	17969	6	0	59041	1	1	0	0	0.800875	0.676979	0.6063	0.907206	0.952866	0	DAZL.target
TMEM199	Tmem199	ENSG00000244045.6	17	26684604	26708716	69.2356	0.556559	186.714	1307	24112	7	1	58998	0	1	0	0	0.294578	0.369433	0.778606	0.73946	0.923933	0	DAZL.target
TMEM260	Tmem260	ENSG00000070269.9	14	56955072	57117324	98.4887	0.428038	137.2	2058	162252	15	0	58974	3	0	3	0	-1.24602	1.16123	-0.222127	1.33635	0.766294	0	DAZL.target
TMEM39A	Tmem39a	ENSG00000176142.8	3	119148347	119187677	93.1013	0.470243	189.375	1515	39330	8	0	58730	0	1	0	0	0.517583	0.512473	0.783784	0.665338	0.908976	0	DAZL.target
TMEM39B	Tmem39b	ENSG00000121775.13	1	32537632	32568467	68.9569	0.559094	186.857	1308	30835	7	0	58985	0	0	0	0	0.155418	0.228751	0.441983	0.816551	0.915863	0	DAZL.target
TMEM87A	Tmem87a	ENSG00000103978.11	15	42502730	42565861	87.7765	0.433086	90.15	1803	63131	20	0	59049	0	2	0	1	1.25907	0.505465	1.23753	0.714646	1.08218	0	DAZL.target
TMEM87B	Tmem87b	ENSG00000153214.5	2	112812800	112876895	85.4267	0.39228	93.7895	1782	64095	19	2	58959	4	13	1	1	0.663408	0.796812	0.23087	-0.689313	-0.343072	1	DAZL.target
TMPO	Tmpo	ENSG00000120802.9	12	98909290	98944157	79.4375	0.433038	302.7	3027	34867	10	0	59038	0	1	0	1	0.433109	-0.348888	0.677222	0.572048	0.80228	0	DAZL.target
TMTC3	Tmtc3	ENSG00000139324.7	12	88536073	88593664	83.6306	0.373263	217.154	2823	57591	13	0	58962	0	3	0	2	0.878024	-0.618463	1.00391	0.184043	0.583056	0	DAZL.target
TMTC4	Tmtc4	ENSG00000125247.11	13	101256181	101327347	82.2535	0.493086	136.611	2459	71166	18	0	59041	1	1	0	1	0.950073	0.221478	0.453404	0.870134	0.856613	0	DAZL.target
TMX1	Tmx1	ENSG00000139921.8	14	51706880	51722759	78.8507	0.439216	106.444	958	15879	9	0	58795	1	2	1	2	-0.398369	-0.922835	0.210207	0.319047	0.364261	0	DAZL.target
TMX3	Tmx3	ENSG00000166479.5	18	66340925	66382535	71.6619	0.393345	92.3529	1570	41610	17	0	58983	3	16	0	7	1.01095	-2.86293	-0.355882	-1.89479	-1.43636	0	DAZL.target
TNFAIP1	Tnfaip1	ENSG00000109079.5	17	26662628	26674035	84.8022	0.558444	175.833	1055	11407	6	1	58891	2	0	2	0	-1.28234	0.441074	-0.0802983	1.21156	0.777486	0	DAZL.target
TNKS2	Tnks2	ENSG00000107854.5	10	93558069	93625033	79.5934	0.414127	133	3458	66964	26	0	58990	0	4	0	1	1.42659	0.678174	1.30575	0.236114	0.694463	0	DAZL.target
TNRC6A	Tnrc6a	ENSG00000090905.13	16	24741016	24838953	91.9838	0.468882	267.391	6150	97937	23	0	59088	0	1	0	1	1.20042	0.422988	1.15315	1.01146	1.30204	0	DAZL.target
TNRC6B	Tnrc6b	ENSG00000100354.16	22	40440821	40731812	53.1098	0.518522	243.261	5595	290991	23	0	59079	0	2	0	0	0.876951	1.07385	0.748366	0.392599	0.636551	0	DAZL.target
TNRC6C	Tnrc6c	ENSG00000078687.12	17	76000249	76104916	56.8909	0.547019	284.059	4829	104667	17	0	59020	0	2	0	0	0.47747	0.591115	0.564243	0.248213	0.462704	0	DAZL.target
TOLLIP	Tollip	ENSG00000078902.11	11	1295601	1330884	51.131	0.635814	164.4	822	35283	5	0	59105	0	5	0	2	-0.0151371	-1.37385	0.28968	-0.759769	-0.48005	0	DAZL.target
TOMM34	Tomm34	ENSG00000025772.7	20	43570771	43589127	102.434	0.516354	138.857	972	18356	7	0	58936	11	0	0	0	0.564309	0.53239	-2.62354	1.11602	-0.828314	0	DAZL.target
TOMM40	Tomm40	ENSG00000130204.8	19	45393826	45406946	65.451	0.573552	112.75	902	13120	8	0	59250	0	1	0	0	0.231093	0.309667	0.487842	0.495336	0.653735	0	DAZL.target
TOP1	Top1	ENSG00000198900.5	20	39657458	39753127	72.2572	0.441005	134.842	2562	95669	19	0	58771	10	8	0	7	0.975348	-2.86798	-2.41589	-0.836817	-1.41152	0	DAZL.target
TOR1AIP2	Tor1aip2	ENSG00000169905.8	1	179809102	179846938	102.721	0.464158	367.2	1836	37836	5	0	59115	1	0	0	0	0.375277	0.330712	0.205593	0.970258	0.839018	0	DAZL.target
TOX3	Tox3	ENSG00000103460.12	16	52471917	52581714	68.4918	0.468999	149.857	1049	109797	7	0	59020	0	0	0	0	0.257097	0.36906	0.502079	0.834403	0.961661	0	DAZL.target
TP53BP1	Trp53bp1	ENSG00000067369.9	15	43699407	43802926	99.636	0.492074	230.185	6215	103519	27	0	58944	0	10	0	10	1.48128	-2.87279	1.35893	-0.81233	-0.187917	0	DAZL.target
TP53BP2	Trp53bp2	ENSG00000143514.12	1	223967601	224033674	99.8228	0.475672	194.389	3499	66073	18	1	58794	2	0	0	0	1.2443	1.22373	0.499174	1.66167	1.33864	0	DAZL.target
TPR	Tpr	ENSG00000047410.9	1	186280784	186344825	80.9953	0.421565	146.87	7931	64041	54	0	59058	10	12	1	2	1.47619	1.04163	-1.52356	-0.641411	-0.832763	0	DAZL.target
TPRG1L	Tprgl	ENSG00000158109.10	1	3541566	3546691	72.4394	0.552828	160.5	642	5125	4	0	58901	0	6	0	1	0.0286366	-0.696485	0.38571	-0.915006	-0.563373	0	DAZL.target
TRAF3	Traf3	ENSG00000131323.10	14	103243813	103377837	81.532	0.506402	238	2380	134024	10	0	59042	2	5	0	2	0.469655	-0.916913	-0.343019	-0.515391	-0.478621	0	DAZL.target
TRAFD1	Trafd1	ENSG00000135148.7	12	112563305	112591407	101.101	0.498893	169.545	1865	28102	11	0	59115	1	2	1	1	-0.156409	-0.0635841	0.432384	0.50387	0.580076	0	DAZL.target
TRAPPC8	Trappc8	ENSG00000153339.9	18	29409136	29533099	79.6563	0.398114	156.172	4529	123963	29	0	58843	0	8	0	4	1.60101	-0.946838	1.39591	-0.514327	0.0865412	0	DAZL.target
TRIM21	Trim21	ENSG00000132109.8	11	4406127	4414926	82.8364	0.501416	210.286	1472	8799	7	0	58970	9	21	0	1	0.282624	-0.482086	-2.57412	-2.53125	-2.47163	0	DAZL.target
TRIM25	Trim25	ENSG00000121060.10	17	54965270	54991399	117.449	0.546286	216.333	1947	26129	9	0	58900	0	0	0	0	0.800939	0.70284	1.0821	1.28664	1.5115	0	DAZL.target
TRIM28	Trim28	ENSG00000130726.7	19	59055458	59062089	90.0436	0.581813	141.5	2264	6631	16	0	58861	44	113	0	2	0.910718	-0.561579	-2.62354	-2.53125	-2.47163	0	DAZL.target
TRIM33	Trim33	ENSG00000197323.6	1	114935399	115053781	95.8715	0.430197	152.75	3055	118382	20	0	58955	2	1	1	1	0.396933	0.528266	0.281691	1.05795	0.872514	0	DAZL.target
TRIM37	Trim37	ENSG00000108395.9	17	57059999	57184282	81.6563	0.441477	128.792	3091	124283	24	0	59062	4	12	3	1	-1.04707	0.627288	-0.536606	-1.23631	-0.985475	0	DAZL.target
TRIM6	Trim6	ENSG00000121236.15	11	5617339	5634188	92.6079	0.482109	215.875	1727	16849	8	0	59011	8	10	0	0	0.464649	0.448969	-2.17597	-1.35328	-1.63707	0	DAZL.target
TRIP12	Trip12	ENSG00000153827.9	2	230628554	230787955	93.616	0.44336	159.512	6540	159401	41	0	59092	1	49	0	18	2.1333	-2.87279	1.20178	-2.53125	-2.3749	0	DAZL.target
TRMT6	Trmt6	ENSG00000089195.10	20	5917881	5931182	112.118	0.45006	147.909	1627	13301	11	0	59055	1	1	1	0	0.0500048	0.867963	0.650584	0.973809	1.01755	0	DAZL.target
TSC22D1	Tsc22d1	ENSG00000102804.10	13	45007655	45151283	115.271	0.485383	842.75	3371	143628	4	0	58859	4	0	0	0	0.306024	0.265225	-1.07188	0.877634	0.00745555	0	DAZL.target
TSEN34	Tsen34	ENSG00000170892.6	19	54693789	54697585	82.3222	0.653441	240	960	3796	4	0	59017	0	2	0	0	0.252197	0.232647	0.559957	0.180295	0.408708	0	DAZL.target
TSG101	Tsg101	ENSG00000074319.8	11	18489883	18548779	100.649	0.465905	128.455	1413	58896	11	0	59104	1	1	0	0	0.838287	0.822222	0.487956	0.858192	0.868627	0	DAZL.target
TSN	Tsn	ENSG00000211460.7	2	122494679	122525429	97.9062	0.442093	106.286	744	30750	7	0	59138	1	3	1	0	-0.283341	0.600255	0.36133	0.136459	0.284414	0	DAZL.target
TSNAX	Tsnax	ENSG00000116918.9	1	231664399	231702270	89.9814	0.40092	154.833	929	37871	6	0	59184	0	1	0	0	0.540535	0.517988	0.819345	0.655966	0.924826	0	DAZL.target
TSPAN14	Tspan14	ENSG00000108219.10	10	82213922	82292879	90.3076	0.530951	127.778	1150	78957	9	0	59038	1	8	1	2	-0.336985	-0.846587	0.243307	-0.987053	-0.642476	0	DAZL.target
TSPAN3	Tspan3	ENSG00000140391.10	15	77336359	77376326	69.5589	0.471823	122.667	736	39967	6	2	59140	0	7	0	1	0.479152	-0.224412	1.22218	-0.345053	0.0944256	1	DAZL.target
TSR1	Tsr1	ENSG00000167721.6	17	2225797	2240801	97.3809	0.482642	173.882	2956	15004	17	0	58834	2	11	0	5	1.01151	-2.10233	0.114893	-1.19285	-0.79843	0	DAZL.target
TTC13	Ttc13	ENSG00000143643.8	1	231041989	231114621	90.7784	0.426502	114.864	2527	72632	22	0	59140	0	7	0	3	1.37402	-0.666045	1.31867	-0.396413	0.166817	0	DAZL.target
TTC19	Ttc19	ENSG00000011295.11	17	15902694	15948329	57.2791	0.466749	337.182	3709	45635	11	2	58984	1	15	0	0	0.451417	0.526422	0.615006	-1.55434	-1.05084	1	DAZL.target
TTC5	Ttc5	ENSG00000136319.7	14	20724717	20774153	92.2803	0.511421	138.3	1383	49436	10	0	59011	0	5	0	2	0.627928	-0.816201	0.835415	-0.362575	0.0466373	0	DAZL.target
TWF1	Twf1	ENSG00000151239.9	12	44187526	44200178	76.2245	0.42229	177.444	1597	12652	9	0	59042	1	1	0	0	0.458815	0.471389	0.171836	0.598714	0.560007	0	DAZL.target
TWSG1	Twsg1	ENSG00000128791.7	18	9334765	9402418	90.4349	0.467306	189	756	67653	4	0	59090	0	12	0	1	0.29194	-0.462516	0.622589	-1.75193	-1.18374	0	DAZL.target
TXLNA	Txlna	ENSG00000084652.11	1	32645287	32663886	59.6276	0.552244	170.1	1701	18599	10	0	59001	0	1	0	0	0.216701	0.307339	0.459379	0.473221	0.625789	0	DAZL.target
TXN2	Txn2	ENSG00000100348.5	22	36863083	36878077	124.797	0.554274	173	519	14994	3	0	58921	0	12	0	0	0.599906	0.4858	1.01399	-1.43803	-0.816061	0	DAZL.target
TXNL1	Txnl1	ENSG00000091164.8	18	54264439	54318831	73.3031	0.410238	105.444	949	54392	9	0	59011	0	3	0	1	0.541957	-0.19317	0.744849	0.0169038	0.353974	0	DAZL.target
UBA2	Uba2	ENSG00000126261.8	19	34919257	34960853	76.6983	0.434627	119.118	2025	41596	17	0	59080	0	2	0	2	0.927534	-0.489605	0.988162	0.523846	0.846811	0	DAZL.target
UBAC2	Ubac2	ENSG00000134882.11	13	99853028	100038688	100.555	0.470314	134.222	1208	185660	9	0	58950	2	1	1	1	-0.115774	0.0517138	-0.047386	0.784393	0.543211	0	DAZL.target
UBB	Ubb	ENSG00000170315.9	17	16284112	16286059	97.6594	0.545194	696	696	1947	1	2	58890	1	5	0	0	0.257833	0.258038	0.63985	-0.0657639	0.129264	1	DAZL.target
UBC	Ubc	ENSG00000150991.10	12	125396150	125401914	143.061	0.527361	2064	2064	5764	1	0	58441	0	3	0	0	0.242088	0.0994351	0.823679	-0.147666	0.200259	0	DAZL.target
UBE2E3	Ube2e3	ENSG00000170035.11	2	181831975	181941312	72.4577	0.448732	130.8	654	109337	5	0	59083	1	11	1	11	-0.676572	-2.87279	-0.0251836	-1.69391	-1.28653	0	DAZL.target
UBE2G1	Ube2g1	ENSG00000132388.8	17	4172554	4269923	93.0319	0.452276	108.6	543	97369	5	0	58892	2	14	1	4	-0.443092	-2.09347	-0.25368	-1.91518	-1.47671	0	DAZL.target
UBE2J2	Ube2j2	ENSG00000160087.16	1	1189289	1209265	151.207	0.504754	136	816	19976	6	0	59021	3	8	1	2	0.239668	-0.535402	0.177163	-0.394193	-0.165089	0	DAZL.target
UBE2O	Ube2o	ENSG00000175931.8	17	74385532	74449288	98.2454	0.571392	218.529	3715	63756	17	0	58849	0	2	0	1	0.994201	0.183368	1.06491	0.608873	0.926765	0	DAZL.target
UBE2Q1	Ube2q1	ENSG00000160714.5	1	154521053	154531504	125.507	0.505585	84.5	1014	10451	12	0	59003	2	1	2	1	-0.513864	0.284248	0.404072	1.1684	0.991391	0	DAZL.target
UBE2Q2	Ube2q2	ENSG00000140367.7	15	76135622	76193419	69.5417	0.427606	100.154	1302	57797	13	2	58900	6	21	5	21	-2.59298	-2.87279	-0.848657	-1.86311	-1.49663	1	DAZL.target
UBE2T	Ube2t	ENSG00000077152.5	1	202300785	202311108	115.88	0.441266	105	630	10323	6	0	58967	65	4	65	4	-2.84641	-1.90983	-2.62354	0.0329687	-2.47163	0	DAZL.target
UBE2Z	Ube2z	ENSG00000159202.13	17	46985731	47006418	78.5301	0.498793	135.667	814	20687	6	0	58839	0	1	0	0	0.240478	0.288545	0.547621	0.506267	0.696658	0	DAZL.target
UBE4A	Ube4a	ENSG00000110344.5	11	118230300	118269926	108.215	0.455402	175.579	3336	39626	19	0	59153	0	1	0	0	1.28757	1.21593	1.34674	1.12467	1.46196	0	DAZL.target
UBE4B	Ube4b	ENSG00000130939.14	1	10092890	10241297	93.9067	0.49189	146	4088	148407	28	0	59096	2	4	1	2	0.669537	0.174892	0.402806	0.339668	0.42399	0	DAZL.target
UBFD1	Ubfd1	ENSG00000103353.11	16	23568392	23585710	63.4803	0.524	136.143	953	17318	7	0	58904	0	1	0	0	0.118046	0.208798	0.416249	0.426464	0.579977	0	DAZL.target
UBN1	Ubn1	ENSG00000118900.10	16	4896666	4932361	103.43	0.522126	193.526	3677	35695	19	0	58820	2	6	1	0	0.232637	1.09804	0.2072	-0.265226	-0.0814236	0	DAZL.target
UBTF	Ubtf	ENSG00000108312.10	17	42282401	42298994	101.707	0.54741	122.211	2322	16593	19	3	58902	1	2	1	2	0.734257	0.130768	1.89076	1.91087	2.03314	0	DAZL.target
UNC119	Unc119	ENSG00000109103.7	17	26873725	26879686	63.2542	0.604095	161.2	806	5961	5	1	59015	0	4	0	0	0.178511	0.252271	0.693525	-0.185043	0.108844	0	DAZL.target
UNG	Ung	ENSG00000076248.6	12	109535379	109548797	73.5223	0.53558	155.571	1089	13418	7	0	59049	3	14	2	2	-1.48452	-1.19093	-0.899495	-2.04788	-1.76962	0	DAZL.target
UPF1	Upf1	ENSG00000005007.8	19	18942747	18979045	85.4639	0.584424	149.5	3289	36298	22	0	59041	0	1	0	0	1.15582	1.17233	1.12068	1.00352	1.26868	0	DAZL.target
UPF2	Upf2	ENSG00000151461.15	10	11962021	12085169	93.7188	0.41747	186	3906	123148	21	0	59112	2	8	0	4	1.32133	-1.26623	0.279601	-0.622225	-0.304693	0	DAZL.target
URB2	Urb2	ENSG00000135763.5	1	229761981	229795946	104.268	0.48016	514.333	4629	33965	9	0	59080	0	1	0	0	0.463186	0.385471	0.775049	0.642311	0.886011	0	DAZL.target
USB1	Usb1	ENSG00000103005.7	16	58033450	58055522	78.3064	0.567466	120.714	845	22072	7	0	58909	0	1	0	0	0.309728	0.356666	0.576901	0.548025	0.730964	0	DAZL.target
USP1	Usp1	ENSG00000162607.8	1	62901968	62917475	70.9962	0.361004	300.75	2406	15507	8	0	58954	0	1	0	1	0.442275	-0.370956	0.704859	0.540291	0.796497	0	DAZL.target
USP16	Usp16	ENSG00000156256.10	21	30396950	30426809	69.8507	0.380689	144.111	2594	29859	18	0	59029	2	2	2	0	-0.689025	1.01932	0.0479143	0.538269	0.427009	0	DAZL.target
USP22	Usp22	ENSG00000124422.7	17	20902910	20947073	97.7986	0.533221	123.25	1479	44163	12	2	58715	4	12	1	4	0.18654	-1.5037	-0.0638911	-0.746526	-0.51467	1	DAZL.target
USP28	Usp28	ENSG00000048028.7	11	113668596	113746292	93.288	0.440291	140.36	3509	77696	25	0	59029	2	109	2	107	-0.215759	-2.87279	0.385248	-2.53125	-2.47163	0	DAZL.target
USP3	Usp3	ENSG00000140455.12	15	63796793	63886839	84.0492	0.439957	112.8	1692	90046	15	0	58832	0	5	0	5	0.933981	-2.09626	1.00338	-0.250734	0.198301	0	DAZL.target
USP31	Usp31	ENSG00000103404.10	16	23072727	23160591	90.3585	0.490322	254.067	3811	87864	15	0	58779	0	5	0	5	0.785339	-2.28357	0.900952	-0.315201	0.107856	0	DAZL.target
USP34	Usp34	ENSG00000115464.10	2	61414598	61697904	72.3522	0.392744	139.037	11123	283306	80	0	58938	1	10	1	4	2.06134	0.750416	1.54059	-0.127214	0.371478	0	DAZL.target
USP37	Usp37	ENSG00000135913.6	2	219314974	219433084	89.3913	0.425637	133.826	3078	118110	23	0	59115	0	2	0	0	1.40637	1.43743	1.3135	0.77089	1.15263	0	DAZL.target
USP7	Usp7	ENSG00000187555.10	16	8985951	9058371	95.5959	0.431713	113.419	3516	72420	31	0	58926	1	24	1	2	0.906139	0.366782	1.07647	-2.16344	-1.31897	0	DAZL.target
VAMP3	Vamp3	ENSG00000049245.8	1	7831329	7841492	102.081	0.450892	81.25	325	10163	4	0	58986	1	2	0	1	0.485065	-0.341497	0.298358	0.37331	0.440165	0	DAZL.target
VAMP4	Vamp4	ENSG00000117533.10	1	171669300	171711387	77.3639	0.376299	66.8571	468	42087	7	0	59100	0	0	0	0	0.597182	0.607258	0.820117	1.03315	1.2458	0	DAZL.target
VAPA	Vapa	ENSG00000101558.9	18	9913999	9960018	81.083	0.441802	132.429	927	46019	7	0	59045	0	1	0	1	0.417626	-0.329949	0.681277	0.584181	0.812481	0	DAZL.target
VASP	Vasp	ENSG00000125753.9	19	46009837	46030241	59.2315	0.603205	87.4545	962	20404	11	0	58927	0	2	0	0	0.398315	0.491764	0.574311	0.250212	0.463891	0	DAZL.target
VDAC2	Vdac2	ENSG00000165637.9	10	76969912	76991206	68.8138	0.461731	101.8	1018	21294	10	0	58959	1	5	1	0	-0.483347	0.497396	0.11077	-0.507112	-0.309037	0	DAZL.target
VEZF1	Vezf1	ENSG00000136451.4	17	56048910	56065620	98.9167	0.473819	352.75	1411	16710	4	0	59095	0	1	0	1	0.267002	-0.547569	0.65702	0.538049	0.763544	0	DAZL.target
VHLL	Vhl	ENSG00000189030.8	1	156268415	156269428	86.8609	0.566745	426	426	1013	1	0	58805	0	0	0	0	-0.0652023	-0.0390782	0.375657	0.706812	0.805588	0	DAZL.target
VMP1	Vmp1	ENSG00000062716.6	17	57784553	57919616	88.3004	0.428741	113.417	1361	135063	12	1	59000	0	10	0	7	1.01566	-2.84475	1.30965	-0.898922	-0.281225	1	DAZL.target
VPS13C	Vps13c	ENSG00000129003.11	15	62144588	62352672	78.0876	0.392621	138.221	11887	208084	86	0	59048	10	12	10	11	-2.73124	-1.85296	-1.24838	-0.328887	-0.577007	0	DAZL.target
VPS26A	Vps26a	ENSG00000122958.10	10	70883268	70932617	64.6999	0.366684	128.625	1029	49349	8	0	58963	1	0	0	0	0.503178	0.536609	0.185222	0.951551	0.826598	0	DAZL.target
VPS39	Vps39	ENSG00000166887.11	15	42450899	42500514	91.9778	0.489285	108.038	2809	49615	26	0	58901	1	0	0	0	1.46879	1.49646	0.829473	1.55269	1.49663	0	DAZL.target
VPS54	Vps54	ENSG00000143952.15	2	64119280	64246206	72.3197	0.384029	133.957	3081	126926	23	0	58912	2	7	0	0	1.33117	1.39077	0.220686	-0.498197	-0.237786	0	DAZL.target
WBP4	Wbp4	ENSG00000120688.7	13	41635410	41658137	73.1616	0.393488	131.444	1183	22727	9	0	59053	6	0	2	0	-1.14923	0.561918	-1.62873	1.00604	-0.219928	0	DAZL.target
WDHD1	Wdhd1	ENSG00000198554.7	14	55405668	55493823	83.5977	0.407987	141.6	3540	88155	25	0	59027	3	4	3	3	-0.94456	-0.586868	-0.0754977	0.242812	0.174123	0	DAZL.target
WDR26	Wdr26	ENSG00000162923.10	1	224572845	224624735	67.0058	0.430218	134.308	1746	51890	13	0	58708	0	0	0	0	0.612478	0.681499	0.756547	1.03529	1.21086	0	DAZL.target
WDR3	Wdr3	ENSG00000065183.11	1	118472343	118509165	93.5197	0.43245	113.929	3190	36822	28	0	58989	15	15	14	5	-2.84641	-1.43062	-2.62354	-1.38769	-1.71988	0	DAZL.target
WDR33	Wdr33	ENSG00000136709.7	2	128458596	128568761	96.2713	0.479829	206.682	4547	110165	22	0	59024	1	1	1	1	0.345609	0.478532	0.683103	1.04721	1.07706	0	DAZL.target
WDR37	Wdr37	ENSG00000047056.10	10	1095478	1178237	68.1529	0.517899	122	1586	82759	13	0	59172	0	13	0	0	0.548122	0.657354	0.678394	-1.77365	-1.20391	0	DAZL.target
WDR43	Wdr43	ENSG00000163811.7	2	29117509	29171088	49.2443	0.433702	112.059	1905	53579	17	0	58955	0	9	0	6	0.650303	-2.73571	0.73753	-1.17011	-0.674946	0	DAZL.target
WDR45B	Wdr45b	ENSG00000141580.11	17	80572438	80606429	96.3145	0.478874	109.5	1095	33991	10	0	58909	3	14	0	0	0.719079	0.713294	-0.475733	-1.7429	-1.37279	0	DAZL.target
WDR61	Wdr61	ENSG00000140395.4	15	78570177	78592136	72.7136	0.448023	111	999	21959	9	2	58994	0	0	0	0	0.720607	0.770307	1.40054	1.6597	1.84814	0	DAZL.target
WDR76	Wdr76	ENSG00000092470.7	15	44119161	44160617	86.0192	0.439303	150.692	1959	41456	13	0	59102	1	2	1	1	-0.125068	0.00855533	0.397217	0.463922	0.542892	0	DAZL.target
WDR77	Wdr77	ENSG00000116455.9	1	111982512	111991998	60.2758	0.546384	137.636	1514	9486	11	0	58891	0	1	0	0	0.299391	0.389046	0.519239	0.524013	0.686849	0	DAZL.target
WDTC1	Wdtc1	ENSG00000142784.11	1	27561007	27635110	76.5592	0.556273	141.533	2123	74103	15	0	59058	2	2	0	1	0.723028	0.0126066	-0.186779	0.418535	0.230248	0	DAZL.target
WEE1	Wee1	ENSG00000166483.6	11	9595228	9615004	90.6668	0.408968	151.222	1361	19776	9	0	58999	1	1	1	0	-0.226376	0.650594	0.378986	0.743049	0.749761	0	DAZL.target
WNK1	Wnk1	ENSG00000060237.12	12	861759	1020618	107.588	0.478118	291.533	8746	158859	30	0	58992	1	23	0	9	1.72697	-2.87279	0.977496	-2.09569	-1.30133	0	DAZL.target
WRAP73	Wrap73	ENSG00000116213.11	1	3547331	3569325	74.7767	0.563129	136.917	1643	21994	12	0	58882	0	5	0	0	0.526994	0.578834	0.698841	-0.441428	-0.0728855	0	DAZL.target
WSB1	Wsb1	ENSG00000109046.10	17	25621102	25640657	137.429	0.449464	152.333	1371	19555	9	2	58960	0	10	0	8	1.47171	-2.87279	2.23743	-0.100445	0.606545	1	DAZL.target
XPO1	Xpo1	ENSG00000082898.12	2	61704984	61765761	69.2012	0.366911	143.417	3442	60777	24	0	58902	0	3	0	0	1.34708	1.36836	1.2493	0.413972	0.837199	0	DAZL.target
XPOT	Xpot	ENSG00000184575.7	12	64798130	64844907	90.2238	0.410433	126.375	3033	46777	24	0	58997	0	2	0	0	1.46725	1.45612	1.38843	0.82722	1.22449	0	DAZL.target
YAP1	Yap1	ENSG00000137693.9	11	101981192	102104154	79.2568	0.526766	175.667	1581	122962	9	0	58893	0	33	0	27	0.431147	-2.87279	0.624756	-2.53125	-2.47163	0	DAZL.target
YEATS4	Yeats4	ENSG00000127337.2	12	69753483	69784576	69.7245	0.374178	103.714	726	31093	7	0	59047	1	2	1	0	-0.425183	0.5046	0.191977	0.262145	0.321908	0	DAZL.target
YES1	Yes1	ENSG00000176105.9	18	721588	812547	91.2849	0.402162	154.909	1704	90959	11	0	58986	7	14	0	2	0.854076	-0.61298	-1.67	-1.73267	-1.65501	0	DAZL.target
YIPF4	Yipf4	ENSG00000119820.6	2	32502979	32541663	64.1235	0.425434	128.5	771	38684	6	0	59129	0	6	0	3	0.206037	-1.7722	0.501845	-0.855783	-0.462402	0	DAZL.target
YLPM1	Ylpm1	ENSG00000119596.13	14	75230069	75322244	55.5466	0.462193	322.81	6779	92175	21	0	58809	0	1	0	0	0.667628	0.770278	0.68848	0.673129	0.86697	0	DAZL.target
YME1L1	Yme1l1	ENSG00000136758.14	10	27399383	27444195	88.0535	0.401933	108.857	2286	44812	21	2	59051	0	12	0	0	1.64143	1.63237	2.05129	-0.504716	0.214881	1	DAZL.target
YPEL5	Ypel5	ENSG00000119801.8	2	30369807	30383399	109.822	0.469886	189	378	13592	2	0	59071	0	3	0	0	0.380895	0.319846	0.800152	0.0489946	0.393529	0	DAZL.target
YRDC	Yrdc	ENSG00000196449.3	1	38268616	38273857	82.3582	0.538721	118.75	475	5241	4	0	59161	0	0	0	0	0.159569	0.192403	0.508501	0.858787	0.979319	0	DAZL.target
YTHDF1	Ythdf1	ENSG00000149658.13	20	61826781	61847586	73.4496	0.466505	419.25	1677	20805	4	0	59129	0	3	0	0	-0.0493759	-0.00251125	0.345835	-0.30701	-0.0486259	0	DAZL.target
YTHDF2	Ythdf2	ENSG00000198492.10	1	29063133	29096287	54.2605	0.478616	354	1770	33154	5	0	59057	0	0	0	0	-0.185817	-0.0792732	0.20038	0.59493	0.660435	0	DAZL.target
YWHAB	Ywhab	ENSG00000166913.8	20	43514317	43537173	93.1083	0.447364	154.2	771	22856	5	0	59035	12	5	0	0	0.405737	0.393209	-2.62354	-0.48121	-1.57622	0	DAZL.target
YWHAE	Ywhae	ENSG00000108953.12	17	1247566	1303672	104.126	0.46198	134.5	807	56106	6	0	59250	0	41	0	26	0.602297	-2.87279	0.895677	-2.53125	-2.47163	0	DAZL.target
YY1	Yy1	ENSG00000100811.6	14	100704635	100749129	78.53	0.422301	147.5	590	44494	4	0	58997	1	1	0	0	0.249	0.284242	0.0401885	0.482693	0.424505	0	DAZL.target
ZBTB11	Zbtb11	ENSG00000066422.4	3	101367733	101396339	89.8704	0.427379	302.636	3329	28606	11	0	59080	1	3	0	0	0.610067	0.568494	0.301507	0.0810447	0.22149	0	DAZL.target
ZBTB16	Zbtb16	ENSG00000109906.9	11	113930315	114121398	73.399	0.580539	353	2118	191083	6	0	59017	1	1	0	0	0.160223	0.274767	-0.140016	0.364341	0.244734	0	DAZL.target
ZBTB18	Zbtb18	ENSG00000179456.9	1	244214585	244220778	86.2275	0.444811	804	1608	6193	2	0	58676	0	0	0	0	-0.101839	-0.091523	0.362471	0.614436	0.739414	0	DAZL.target
ZBTB37	Zbtb37	ENSG00000185278.10	1	173837220	173872687	45.1243	0.502974	530	1590	35467	3	0	58750	0	1	0	0	-0.469274	-0.323399	-0.00709115	0.0458989	0.122373	0	DAZL.target
ZBTB44	Zbtb44	ENSG00000196323.7	11	130096572	130184581	50.581	0.475548	398.75	1595	88009	4	0	58934	0	1	0	0	-0.257032	-0.10982	0.130077	0.152539	0.26286	0	DAZL.target
ZC3H14	Zc3h14	ENSG00000100722.14	14	89029253	89079853	83.0538	0.445731	152.167	2739	50600	18	0	59004	0	6	0	2	0.991284	-0.446988	1.03956	-0.415254	0.067142	0	DAZL.target
ZC3H15	Zc3h15	ENSG00000065548.13	2	187350883	187374090	58.6003	0.392419	141.444	1273	23207	9	0	58974	1	0	0	0	0.383123	0.437592	0.0860695	0.903787	0.747537	0	DAZL.target
ZC3H7B	Zc3h7b	ENSG00000100403.10	22	41697526	41756151	86.341	0.580064	141.318	3109	58625	22	0	59173	0	1	0	0	1.18478	1.21403	1.13673	1.01351	1.28234	0	DAZL.target
ZCCHC14	Zcchc14	ENSG00000140948.7	16	87439852	87525651	87.8562	0.519971	238	2856	85799	12	0	59108	2	2	2	2	-1.08735	-0.823219	-0.218828	0.363723	0.185099	0	DAZL.target
ZDHHC18	Zdhhc18	ENSG00000204160.7	1	27153201	27184093	111.811	0.567045	124.857	874	30892	7	0	59055	1	2	0	2	0.708959	-0.812181	0.456575	0.525894	0.597526	0	DAZL.target
ZFAND6	Zfand6	ENSG00000086666.14	15	80351910	80430735	67.2376	0.411412	145.4	727	78825	5	0	59021	0	4	0	0	0.228953	0.306335	0.517965	-0.425068	-0.0885815	0	DAZL.target
ZFP36L1	Zfp36l1	ENSG00000185650.8	14	69254377	69263190	88.6171	0.66044	555.333	1666	8813	3	0	58804	0	0	0	0	0.151233	0.108342	0.509817	0.791228	0.90958	0	DAZL.target
ZFP64	Zfp64	ENSG00000020256.15	20	50668202	50820847	92.4763	0.549138	287.333	3448	152645	12	0	58674	0	4	0	4	0.662436	-1.90543	0.799239	-0.171743	0.192861	0	DAZL.target
ZMYM2	Zmym2	ENSG00000121741.12	13	20532810	20665968	52.064	0.39633	181.458	4355	133158	24	1	58693	1	14	0	7	1.20533	-2.60229	0.774406	-1.401	-0.821717	1	DAZL.target
ZMYM5	Zmym5	ENSG00000132950.14	13	20397622	20437776	108.024	0.385423	277.8	1389	40154	5	1	59148	3	397	2	355	-0.868217	-2.87279	-0.0584939	-2.53125	-2.47163	1	DAZL.target
ZNF106	Zfp106	ENSG00000103994.12	15	42705021	42783321	93.5806	0.445892	303.684	5770	78300	19	0	58990	2	0	1	0	0.117063	1.00103	0.073167	1.29355	0.93283	0	DAZL.target
ZNF207	Zfp207	ENSG00000010244.12	17	30677136	30708905	76.4929	0.485686	122.571	1716	31769	14	1	58705	1	4	0	3	0.824554	-1.18045	0.614801	0.159758	0.357752	1	DAZL.target
ZNF217	Zfp217	ENSG00000171940.9	20	52183604	52226446	81.923	0.407902	664.6	3323	42842	5	0	58881	0	3	0	3	0.0964924	-1.97677	0.469817	-0.275387	0.0282728	0	DAZL.target
ZNF263	Zfp263	ENSG00000006194.6	16	3313743	3351401	88.7379	0.548049	534.857	3744	37658	7	0	58915	2	3	1	0	-0.755712	0.145387	-0.507369	-0.17842	-0.315393	0	DAZL.target
ZNF266	Zfp266	ENSG00000174652.13	19	9523272	9546254	124.356	0.450506	418.5	1674	22982	4	0	59066	2	0	0	0	0.588597	0.454658	0.0231402	1.16327	0.810554	0	DAZL.target
ZNF281	Zfp281	ENSG00000162702.7	1	200374068	200379184	94.4668	0.472727	2694	2694	5116	1	0	59147	0	0	0	0	-0.407239	-0.36692	0.0366947	0.185656	0.264429	0	DAZL.target
ZNF287	Zfp287	ENSG00000141040.10	17	16454701	16472520	90.6303	0.442813	462.8	2314	17819	5	2	58955	1	6	0	0	0.495483	0.465537	0.781571	-0.151958	0.13332	1	DAZL.target
ZNF410	Zfp410	ENSG00000119725.13	14	74353320	74399214	92.411	0.462275	139.417	1673	45894	12	0	58932	0	22	0	0	0.780239	0.781403	0.948238	-2.53125	-1.75679	0	DAZL.target
ZNF438	Zfp438	ENSG00000183621.11	10	31109136	31320866	85.1625	0.424365	628.75	2515	211730	4	0	58827	0	7	0	3	0.178803	-1.81376	0.476945	-1.17499	-0.733377	0	DAZL.target
ZNF512	Zfp512	ENSG00000243943.5	2	27805897	27858041	89.5995	0.462006	111.85	2237	52144	20	0	58987	0	6	0	0	1.19034	1.2122	1.19055	-0.288741	0.214825	0	DAZL.target
ZNF516	Zfp516	ENSG00000101493.6	18	74069644	74207146	41.5676	0.614609	701.6	3508	137502	5	0	59156	1	0	0	0	-0.384329	-0.227927	-0.55885	0.408923	0.0920672	0	DAZL.target
ZNF532	Zfp532	ENSG00000074657.9	18	56529832	56653712	111.346	0.485937	496.25	3970	123880	8	0	59131	2	2	2	0	-1.13065	0.509096	-0.142449	0.36224	0.214349	0	DAZL.target
ZNF597	Zfp597	ENSG00000167981.4	16	3486104	3493542	82.6528	0.554798	431	1293	7438	3	0	58944	0	1	0	0	-0.0391692	-0.0126574	0.369902	0.334356	0.490536	0	DAZL.target
ZNF609	Zfp609	ENSG00000180357.5	15	64752941	64978264	123.899	0.538363	566.375	4531	225323	8	0	58798	1	1	1	0	-0.185616	0.663418	0.448525	0.781796	0.780714	0	DAZL.target
ZNF638	Zfp638	ENSG00000075292.14	2	71503691	71662199	81.6882	0.383028	233.333	6300	158508	27	0	58952	5	14	5	10	-2.0464	-2.87279	-0.764092	-1.42645	-1.15158	0	DAZL.target
ZNF644	Zfp644	ENSG00000122482.16	1	91380859	91487829	94.3173	0.390639	802.8	4014	106970	5	0	58957	0	0	0	0	0.266479	0.228375	0.608802	0.780844	0.96871	0	DAZL.target
ZNF740	Zfp740	ENSG00000139651.9	12	53574484	53584596	40.4572	0.51027	100	600	10112	6	0	58716	0	1	0	0	-0.151385	-0.0014994	0.210921	0.287071	0.388544	0	DAZL.target
ZNRF3	Znrf3	ENSG00000183579.11	22	29279580	29453475	87.8653	0.568191	319.875	2559	173895	8	0	59116	2	0	0	0	0.417023	0.477333	-0.376934	0.915813	0.466965	0	DAZL.target
ZRANB2	Zranb2	ENSG00000132485.8	1	71528974	71546980	100.388	0.423472	101.333	912	18006	9	0	58872	0	0	0	0	0.806072	0.75629	1.0355	1.22217	1.46326	0	DAZL.target
ZSWIM3	Zswim3	ENSG00000132801.5	20	44486256	44507761	126.113	0.544118	1051.5	2103	21505	2	0	58994	10	2	0	0	0.236942	0.13095	-2.62354	0.206944	-1.16533	0	DAZL.target
ZWINT	Zwint	ENSG00000122952.12	10	58116989	58121036	81.2959	0.539361	110.333	993	4047	9	0	59118	4	4	4	4	-2.56197	-2.11049	-1.0825	-0.230549	-0.580132	0	DAZL.target
A2M	A2m	ENSG00000175899.10	12	9220260	9268825	62.4876	0.476378	127.865	4731	48565	37	0	59039	0	3	0	2	1.56311	0.229215	1.30395	0.571732	0.944284	0	nontarget
A4GALT	A4galt	ENSG00000128274.11	22	43088127	43117304	57.6774	0.644825	1342	1342	29177	1	0	58907	0	2	0	0	-0.500828	-0.384869	-0.0518196	-0.422283	-0.304293	0	nontarget
AAAS	Aaas	ENSG00000094914.8	12	53701240	53718648	116.931	0.560199	114.125	1826	17408	16	0	58888	3	10	3	6	-1.13506	-2.3439	-0.0332105	-0.834987	-0.554665	0	nontarget
AACS	Aacs	ENSG00000081760.12	12	125549925	125627873	98.0574	0.542037	119.059	2024	77948	17	0	58976	1	1	0	1	1.09722	0.326518	0.607059	0.990132	0.999713	0	nontarget
AAGAB	Aagab	ENSG00000103591.8	15	67493371	67547533	96.7857	0.462035	100.8	1008	54162	10	2	58975	0	2	0	1	1.05851	0.27213	1.69832	1.18295	1.53566	0	nontarget
AAK1	Aak1	ENSG00000115977.14	2	69688532	69901481	57.1768	0.501057	141.75	2835	212949	20	0	59067	0	5	0	0	0.847978	1.03231	0.79308	-0.362979	0.016568	0	nontarget
AAR2	Aar2	ENSG00000131043.7	20	34824381	34858840	104.71	0.557065	391	1173	34459	3	0	59105	8	1	1	0	-0.65255	0.223502	-2.26843	0.546424	-0.801224	0	nontarget
AATF	Aatf	ENSG00000108270.6	17	35306175	35414171	95.148	0.500636	146.25	1755	107996	12	2	58985	4	16	0	0	1.09311	1.12044	-0.0915593	-1.26437	-0.888838	1	nontarget
ABAT	Abat	ENSG00000183044.7	16	8768422	8878432	92.5277	0.538692	112.733	1691	110010	15	0	58992	3	41	2	2	-0.740524	-0.455742	-0.386752	-2.53125	-2.47163	0	nontarget
ABCA3	Abca3	ENSG00000167972.9	16	2325882	2390747	95.853	0.600267	179.387	5561	64865	31	0	59018	3	3	3	3	-0.720467	-0.392659	0.0574013	0.685747	0.502134	0	nontarget
ABCA5	Abca5	ENSG00000154265.11	17	67240452	67323385	67.4874	0.366643	137.474	5224	82933	38	0	59021	3	5	3	4	-0.46931	-0.604901	0.177562	0.230405	0.268054	0	nontarget
ABCA6	Abca6	ENSG00000154262.8	17	67074843	67138029	81.9221	0.394058	136.263	5178	63186	38	0	58897	39	40	38	39	-2.84641	-2.87279	-2.62354	-2.53125	-2.47163	0	nontarget
ABCA7	Abca7	ENSG00000064687.8	19	1040102	1065571	72.3686	0.632382	152.556	6865	25469	45	0	58995	33	12	31	7	-2.84641	-1.85354	-2.62354	-0.850865	-2.33108	0	nontarget
ABCA8	Abca8b	ENSG00000141338.9	17	66863433	66951533	80.6359	0.425902	139.622	5166	88100	37	0	59023	5	1	4	1	-1.15115	1.14063	-0.543991	1.33269	0.574197	0	nontarget
ABCB10	Abcb10	ENSG00000135776.4	1	229652329	229694442	96.9328	0.493547	147.667	1772	42113	12	0	59050	3	1	3	0	-1.60072	0.77786	-0.438454	0.829443	0.364927	0	nontarget
ABCB6	Abcb6	ENSG00000115657.8	2	220074490	220083712	84.127	0.553709	133	2660	9222	20	0	58939	2	1	0	0	1.02785	1.04594	0.053705	0.944183	0.686368	0	nontarget
ABCB9	Abcb9	ENSG00000150967.13	12	123405498	123466196	51.8835	0.616184	238.923	3106	60698	13	0	58941	0	4	0	0	0.322277	0.416855	0.481133	-0.365987	-0.0899019	0	nontarget
ABCC1	Abcc1	ENSG00000103222.14	16	16043434	16236931	84.3473	0.561089	154.774	4798	193497	31	2	58953	26	149	0	14	1.89386	-2.87279	-2.62354	-2.53125	-2.47163	1	nontarget
ABCC3	Abcc3	ENSG00000108846.11	17	48712138	48769613	82.3565	0.577257	177.655	5152	57475	29	0	59020	10	5	10	5	-2.84641	-1.63266	-2.14823	0.026904	-0.849949	0	nontarget
ABCC4	Abcc4	ENSG00000125257.9	13	95672083	95953687	77.8921	0.446828	134.323	4164	281604	31	0	59043	4	1	4	1	-1.32237	1.04546	-0.396132	1.1619	0.558902	0	nontarget
ABCC8	Abcc8	ENSG00000006071.7	11	17414432	17498449	84.6648	0.575754	129.051	5033	84017	39	0	59194	1	4	1	2	0.982621	0.515277	1.01557	0.519118	0.769	0	nontarget
ABCD2	Abcd2	ENSG00000173208.3	12	39943835	40013553	92.9845	0.406723	228.3	2283	69718	10	0	58990	0	6	0	0	0.732361	0.701826	0.932391	-0.559736	-0.0718077	0	nontarget
ABCD4	Abcd4	ENSG00000119688.16	14	74752126	74769759	65.3741	0.575188	113.053	2148	17633	19	0	58871	2	2	1	1	-0.0948457	0.112814	-0.147426	0.476491	0.280431	0	nontarget
ABCG1	Abcg1	ENSG00000160179.14	21	43619799	43717354	92.4445	0.574838	145.312	2325	97555	16	0	58991	1	7	1	4	0.0694014	-1.58261	0.491755	-0.59684	-0.257655	0	nontarget
ABHD10	Abhd10	ENSG00000144827.4	3	111697857	111712210	79.7569	0.480798	190.2	951	14353	5	0	59152	1	0	0	0	0.175641	0.210351	-0.0162125	0.842266	0.658879	0	nontarget
ABHD12	Abhd12	ENSG00000100997.14	20	25275379	25371619	68.4314	0.539606	103.5	1449	96240	14	0	58963	1	8	0	0	0.632023	0.751191	0.189387	-1.00069	-0.680858	0	nontarget
ABHD13	Abhd13	ENSG00000139826.5	13	108870727	108886603	81.994	0.380999	1020	1020	15876	1	0	59284	0	2	0	0	-0.0589629	-0.0459866	0.394992	-0.129024	0.128202	0	nontarget
ABHD3	Abhd3	ENSG00000158201.5	18	19230858	19284766	64.87	0.466311	169.375	1355	53908	8	0	58993	0	1	0	0	0.22771	0.318314	0.491496	0.459017	0.639435	0	nontarget
ABHD4	Abhd4	ENSG00000100439.6	14	23067146	23081265	64.3261	0.555567	217.286	1521	14119	7	0	59102	1	5	0	0	0.0717663	0.146417	-0.153571	-0.697929	-0.563347	0	nontarget
ABHD8	Abhd8	ENSG00000127220.5	19	17402940	17421045	66.9692	0.628212	347.5	1390	18105	4	0	58936	1	4	0	0	-0.0283588	0.0180781	-0.217955	-0.547903	-0.47895	0	nontarget
ABI2	Abi2	ENSG00000138443.11	2	204192942	204312446	73.529	0.49232	265.071	3711	119504	14	0	58976	0	1	0	0	0.552753	0.629653	0.675866	0.613651	0.822834	0	nontarget
ABI3	Abi3	ENSG00000108798.4	17	47287589	47300587	43.8164	0.64338	146.5	1172	12998	8	0	58294	0	3	0	0	0.0943751	0.19134	0.355671	-0.2173	-0.00780657	0	nontarget
ABI3BP	Abi3bp	ENSG00000154175.12	3	100468000	100712359	49.022	0.461882	93.5238	3928	244359	42	0	58964	6	7	5	7	-1.76913	-1.85113	-1.02519	-0.279002	-0.54386	0	nontarget
ABLIM1	Ablim1	ENSG00000099204.14	10	116190872	116444762	101.247	0.507668	110.68	2767	253890	25	0	59005	0	0	0	0	1.64704	1.72402	1.4518	1.59515	1.87614	0	nontarget
ABR	Abr	ENSG00000159842.10	17	906758	1132315	73.8297	0.567545	124.957	2874	225557	23	2	59022	6	45	5	8	-2.06795	-2.64309	-0.60878	-2.53125	-2.36295	1	nontarget
ABTB2	Abtb2	ENSG00000166016.4	11	34172535	34379555	48.5455	0.589885	143.188	2291	207020	16	0	59020	1	6	0	0	0.584963	0.778548	0.066242	-0.711183	-0.512343	0	nontarget
ACAA2	Acaa2	ENSG00000167315.13	18	47309869	47340330	72.1196	0.45375	144.375	1155	30461	8	0	59090	0	13	0	0	0.332977	0.38944	0.59469	-1.8784	-1.30261	0	nontarget
ACACA	Acaca	ENSG00000132142.15	17	35441923	35766909	104.307	0.463213	134.448	7798	324986	58	2	58907	4	19	0	0	3.15174	3.31424	1.13379	-0.520906	0.0811098	1	nontarget
ACACB	Acacb	ENSG00000076555.11	12	109554400	109706031	100.867	0.54771	146.698	7775	151631	53	0	59108	0	24	0	6	2.51829	-0.873689	1.96709	-1.76075	-0.863727	0	nontarget
ACAD8	Acad8	ENSG00000151498.7	11	134123389	134135749	66.4299	0.531116	129.167	1550	12360	12	0	58699	4	4	0	0	0.426475	0.503064	-1.1568	-0.273383	-0.643722	0	nontarget
ACADL	Acadl	ENSG00000115361.3	2	211052663	211090215	84.3359	0.418546	127.8	1278	37552	10	0	59044	1	5	1	1	-0.238249	-0.105431	0.333555	-0.373157	-0.115876	0	nontarget
ACADS	Acads	ENSG00000122971.4	12	121163538	121177811	70.6616	0.6356	131.091	1442	14273	11	0	59089	7	3	5	1	-2.84641	-0.214002	-1.97507	0.0423409	-0.848237	0	nontarget
ACADSB	Acadsb	ENSG00000196177.8	10	124768495	124817827	81.6413	0.441372	124.091	1365	49332	11	0	59160	1	1	0	0	0.655117	0.688093	0.29818	0.711084	0.689239	0	nontarget
ACADVL	Acadvl	ENSG00000072778.15	17	7120444	7128592	87.9271	0.5668	134.556	2422	8148	18	0	58776	5	8	4	7	-2.03688	-2.87279	-1.06404	-0.754834	-0.861716	0	nontarget
ACAN	Acan	ENSG00000157766.11	15	89346674	89418585	54.7113	0.59596	466.706	7934	71911	17	0	58971	0	0	0	0	0.368087	0.456392	0.458558	0.897725	0.971701	0	nontarget
ACAP3	Acap3	ENSG00000131584.14	1	1227756	1244989	39.7	0.61688	108.85	2177	17233	20	0	59020	3	9	0	2	0.663871	-0.664303	-0.698752	-1.12941	-1.0571	0	nontarget
ACAT1	Acat1	ENSG00000075239.9	11	107992243	108018503	88.7972	0.448924	117.083	1405	26260	12	0	58938	4	14	2	0	-0.926522	0.774173	-0.828516	-1.73899	-1.44972	0	nontarget
ACBD4	Acbd4	ENSG00000181513.10	17	43209967	43221548	77.9013	0.59874	119.667	1077	11581	9	3	59015	21	0	21	0	-2.84641	0.901978	-2.62354	2.15255	-0.77102	1	nontarget
ACBD5	Acbd5	ENSG00000107897.14	10	27484146	27531059	83.5855	0.451356	131.385	1708	46913	13	2	59021	0	16	0	4	1.04872	-1.51425	1.63497	-1.29933	-0.585242	1	nontarget
ACBD6	Acbd6	ENSG00000135847.5	1	180244515	180472089	89.6419	0.442361	112.125	897	227574	8	0	59000	2	3	1	2	-0.208556	-0.673954	-0.159928	0.0741762	0.0182653	0	nontarget
ACBD7	Acbd7	ENSG00000176244.6	10	15119522	15130775	81.9227	0.472461	72.75	291	11253	4	0	59035	0	2	0	0	0.221064	0.253671	0.562954	0.187518	0.437507	0	nontarget
ACCS	Accs	ENSG00000110455.9	11	44087475	44105772	79.0438	0.569305	113.571	1590	18297	14	0	58909	2	2	0	0	0.708393	0.749029	-0.167573	0.437661	0.251443	0	nontarget
ACD	Acd	ENSG00000102977.9	16	67691415	67694713	68.8615	0.611462	166.917	2003	3298	12	0	58987	1	0	0	0	0.480232	0.515605	0.116555	0.998189	0.807002	0	nontarget
ACE	Ace	ENSG00000159640.10	17	61554422	61599205	79.0161	0.583949	164.346	4273	44783	26	0	58836	4	2	0	0	1.24669	1.287	-0.630531	0.711425	0.19022	0	nontarget
ACE	Ace	ENSG00000264813.1	17	61562184	61599209	78.0952	0.585877	172.923	2248	37025	13	0	58778	4	2	0	0	0.609375	0.644097	-1.02143	0.367873	-0.206049	0	nontarget
ACER1	Acer1	ENSG00000167769.4	19	6306153	6333640	72.0627	0.556235	138.5	831	27487	6	0	58971	1	1	1	0	-0.744954	0.235732	-0.0721828	0.458327	0.346246	0	nontarget
ACER3	Acer3	ENSG00000078124.7	11	76571911	76737841	73.698	0.401623	74.0833	889	165930	12	0	58775	3	8	3	6	-1.55885	-2.58306	-0.506336	-0.942652	-0.808029	0	nontarget
ACIN1	Acin1	ENSG00000100813.10	14	23527773	23564823	99.9138	0.518231	201.737	3833	37050	19	0	58872	0	2	0	0	1.09548	1.05928	1.15532	0.679358	1.01847	0	nontarget
ACMSD	Acmsd	ENSG00000153086.9	2	135596117	135659604	90.658	0.47414	107.1	1071	63487	10	1	58915	0	1	0	1	0.818263	0.0669363	1.20198	1.04206	1.32231	0	nontarget
ACOT11	Acot11	ENSG00000162390.13	1	55007930	55104865	77.0713	0.591086	150.765	2563	96935	17	1	58959	21	39	3	14	-1.38428	-2.87279	-2.62354	-2.53125	-2.47163	1	nontarget
ACOT6	Acot6	ENSG00000205669.2	14	74077649	74086592	132.116	0.453703	318	636	8943	2	0	58761	8	1	8	0	-2.84641	0.478509	-1.8196	0.867898	-0.386945	0	nontarget
ACOT7	Acot7	ENSG00000097021.15	1	6324329	6454451	59.3133	0.59105	115.667	1388	130122	12	0	58265	18	1	18	0	-2.84641	0.616749	-2.62354	0.564928	-1.88301	0	nontarget
ACOT8	Acot8	ENSG00000101473.12	20	44470360	44486045	68.0721	0.616217	158.429	1109	15685	7	0	58985	9	1	0	0	0.228295	0.279034	-2.62354	0.483796	-1.05006	0	nontarget
ACOX1	Acox1	ENSG00000161533.7	17	73937588	73975515	98.0073	0.492452	155.867	2338	37927	15	0	58977	2	7	0	0	0.944016	0.924495	0.0705471	-0.582583	-0.361592	0	nontarget
ACP2	Acp2	ENSG00000134575.5	11	47260853	47270457	73.2365	0.592845	121.385	1578	9604	13	0	58955	1	0	1	0	-0.308363	0.646436	0.209112	1.07329	0.900225	0	nontarget
ACP5	Acp5	ENSG00000102575.6	19	11685475	11689823	80.6594	0.577665	274.75	1099	4348	4	0	58968	1	1	0	0	0.0760246	0.0992491	-0.0965416	0.414411	0.302284	0	nontarget
ACP6	Acp6	ENSG00000162836.7	1	147101453	147142618	72.1239	0.523568	126	1386	41165	11	2	59097	26	24	0	0	0.747137	0.821673	-2.62354	-2.20557	-2.47163	1	nontarget
ACR	Acr	ENSG00000100312.6	22	51176624	51183762	61.7568	0.558039	294.6	1473	7138	5	0	58812	5	17	2	1	-1.80995	-0.815282	-1.84132	-2.53125	-2.42358	0	nontarget
ACRBP	Acrbp	ENSG00000111644.3	12	6747241	6756626	69.533	0.556048	170.7	1707	9385	10	0	59013	1	2	1	1	-0.589995	-0.405948	0.020007	0.216117	0.199355	0	nontarget
ACSBG1	Acsbg1	ENSG00000103740.5	15	78459810	78538030	86.9449	0.553252	156.6	2349	78220	15	2	58993	0	0	0	0	1.11738	1.1531	1.64902	1.88374	2.09688	0	nontarget
ACSBG2	Acsbg2	ENSG00000130377.9	19	6135258	6193112	94.994	0.467474	159.923	2079	57854	13	0	59137	1	5	0	0	0.841261	0.836263	0.456941	-0.252573	0.0143078	0	nontarget
ACSF2	Acsf2	ENSG00000167107.8	17	48503519	48552206	81.701	0.553969	160.235	2724	48687	17	0	59197	0	11	0	1	0.843336	0.10101	0.909962	-1.31623	-0.749952	0	nontarget
ACSL5	Acsl5	ENSG00000197142.6	10	114133776	114188138	95.8012	0.47795	109.364	2406	54362	22	0	58951	1	6	1	3	0.432187	-0.705036	0.773802	-0.189307	0.166686	0	nontarget
ACSS1	Acss1	ENSG00000154930.10	20	24986868	25039616	78.4081	0.590207	157.867	2368	52748	15	0	59042	0	5	0	0	0.744121	0.786489	0.831972	-0.332692	0.0554633	0	nontarget
ACTA2	Acta2	ENSG00000107796.8	10	90694831	90751147	100.807	0.528822	159.5	1276	56316	8	0	59035	0	1	0	0	0.602919	0.592702	0.855697	0.740045	0.984967	0	nontarget
ACTG1	Actg1	ENSG00000184009.5	17	79476997	79490873	95.6318	0.588224	236	1416	13876	6	0	59004	0	0	0	0	0.391341	0.361812	0.699797	0.993157	1.14603	0	nontarget
ACTN2	Actn2	ENSG00000077522.8	1	236849754	236927931	88.5564	0.525073	133.857	2811	78177	21	0	58919	4	3	4	0	-1.85231	1.20176	-0.635577	0.385771	0.00550186	0	nontarget
ACTN4	Actn4	ENSG00000130402.7	19	39138289	39222223	67.5168	0.588766	132.88	3322	83934	25	0	58868	0	1	0	0	1.14638	1.24757	1.0334	0.950987	1.18826	0	nontarget
ACTR1A	Actr1a	ENSG00000138107.7	10	104238986	104262482	115.511	0.519684	108.818	1197	23496	11	0	59110	2	0	0	0	0.976316	0.901771	0.197942	1.38381	1.03809	0	nontarget
ACTR1B	Actr1b	ENSG00000115073.6	2	98272431	98280570	86.9698	0.568757	108.818	1197	8139	11	0	59012	0	43	0	0	0.636795	0.648424	0.822958	-2.53125	-2.47163	0	nontarget
ACTR2	Actr2	ENSG00000138071.9	2	65454887	65498387	95.7728	0.420765	132.4	1324	43500	10	0	58934	1	5	1	2	-0.112275	-0.690875	0.461943	-0.281454	0.00152271	0	nontarget
ACTR3	Actr3	ENSG00000115091.7	2	114647537	114720173	80.143	0.407191	116.273	1279	72636	11	0	58872	0	0	0	0	0.73837	0.769847	0.887711	1.1068	1.32073	0	nontarget
ACTR5	Actr5	ENSG00000101442.8	20	37377085	37400834	75.5267	0.526032	208.667	1878	23749	9	0	59115	8	0	0	0	0.303719	0.349679	-2.36035	0.903518	-0.702698	0	nontarget
ACVR1	Acvr1	ENSG00000115170.9	2	158592958	158732374	96.5703	0.471774	176	1584	139416	9	0	59173	1	0	0	0	0.680141	0.710401	0.335631	1.10044	0.985829	0	nontarget
ACVR1B	Acvr1b	ENSG00000135503.8	12	52345451	52390862	83.5953	0.550776	201.111	1810	45411	9	1	58920	0	1	0	0	0.558718	0.595953	0.987999	0.892462	1.12072	0	nontarget
ACVR2A	Acvr2a	ENSG00000121989.10	2	148602086	148688393	115.137	0.425844	146.182	1608	86307	11	0	59064	32	48	23	46	-2.84641	-2.87279	-2.62354	-2.53125	-2.47163	0	nontarget
ACY3	Acy3	ENSG00000132744.3	11	67410026	67418130	67.5153	0.621189	166	996	8104	6	0	58869	0	10	0	0	0.167118	0.213693	0.452066	-1.55061	-1.09101	0	nontarget
ACYP1	Acyp1	ENSG00000119640.4	14	75519924	75536186	77.7242	0.447274	143	429	16262	3	0	58791	1	0	0	0	0.116576	0.154005	-0.0494933	0.805587	0.622721	0	nontarget
ADA	Ada	ENSG00000196839.8	20	43248163	43280874	84.5099	0.573551	102.273	1125	32711	11	0	58855	7	0	0	0	0.632835	0.665962	-1.87495	1.10409	-0.320992	0	nontarget
ADAD2	Adad2	ENSG00000140955.6	16	84224744	84230774	45.7516	0.673065	205.6	2056	6030	10	0	58904	10	6	0	0	0.248347	0.301891	-2.62354	-0.836068	-1.73893	0	nontarget
ADAM15	Adam15	ENSG00000143537.9	1	155023042	155035252	73.9172	0.612236	130.522	3002	12210	23	0	58999	1	0	0	0	1.12398	1.15865	0.531984	1.34767	1.219	0	nontarget
ADAM17	Adam17	ENSG00000151694.8	2	9628615	9695921	84.3671	0.431916	138.105	2624	67306	19	0	58964	0	3	0	0	1.1096	1.13327	1.12137	0.335852	0.728871	0	nontarget
ADAM23	Adam23	ENSG00000114948.8	2	207308263	207485851	85.4471	0.462404	100.96	2524	177588	25	0	59013	1	1	1	1	0.559691	0.786084	0.770269	1.1069	1.14952	0	nontarget
ADAMTS10	Adamts10	ENSG00000142303.9	19	8645126	8675620	75.65	0.617881	140.762	2956	30494	21	0	59126	2	4	2	1	-0.636939	0.306939	0.0289735	0.0681551	0.0707076	0	nontarget
ADAMTS20	Adamts20	ENSG00000173157.12	12	43747669	43945724	57.7367	0.425717	151.154	5895	198055	39	0	58910	1	2	0	1	1.73255	1.12827	0.822728	0.874518	0.978831	0	nontarget
ADAMTS4	Adamts4	ENSG00000158859.9	1	161154098	161168846	90.3205	0.612206	292.222	2630	14748	9	0	59153	0	1	0	0	0.474285	0.436372	0.718318	0.64051	0.849901	0	nontarget
ADAMTS7	Adamts7	ENSG00000136378.10	15	79051545	79103773	43.0706	0.649595	235.19	4939	52228	21	0	58898	61	32	61	31	-2.84641	-2.87279	-2.62354	-2.53125	-2.47163	0	nontarget
ADAMTSL4	Adamtsl4	ENSG00000143382.9	1	150521884	150533413	83.5376	0.630834	193	3474	11529	18	0	58925	1	5	1	2	0.0457114	-0.529917	0.457986	-0.203416	0.0311118	0	nontarget
ADAR	Adar	ENSG00000160710.11	1	154554538	154600475	97.2568	0.52395	244.875	3918	45937	16	0	58899	0	1	0	0	0.881519	0.851927	1.00001	0.875111	1.13965	0	nontarget
ADARB1	Adarb1	ENSG00000197381.11	21	46493768	46646478	73.8507	0.529101	212.091	2333	152710	11	0	59096	2	25	0	1	0.460601	-0.214624	-0.386558	-2.53125	-2.40998	0	nontarget
ADAT1	Adat1	ENSG00000065457.6	16	75630879	75657198	128.392	0.491915	179.889	1619	26319	9	0	58946	6	8	6	0	-2.84641	0.848165	-1.10781	-0.620102	-0.762821	0	nontarget
ADCK1	Adck1	ENSG00000063761.11	14	78266426	78401355	98.8332	0.558719	163.2	1632	134929	10	0	59124	4	2	4	0	-2.26515	0.764658	-0.867009	0.452395	-0.0797112	0	nontarget
ADCY10	Adcy10	ENSG00000143199.13	1	167778625	167883453	113.689	0.443011	158.061	5216	104828	33	0	58933	4	4	3	2	-0.343578	0.542347	0.0576893	0.662283	0.510598	0	nontarget
ADCY3	Adcy3	ENSG00000138031.10	2	25042038	25142708	76.9545	0.56545	165.045	3631	100670	22	0	59052	8	4	0	0	1.05867	1.13396	-1.92259	0.0470957	-0.77566	0	nontarget
ADCY6	Adcy6	ENSG00000174233.7	12	49159975	49182820	73.8103	0.570414	188.429	3957	22845	21	0	59007	0	1	0	0	0.908271	0.946417	0.919368	0.855181	1.08306	0	nontarget
ADCY7	Adcy7	ENSG00000121281.8	16	50280048	50352046	79.0477	0.606836	134	3216	71998	24	0	59082	0	2	0	1	1.24706	0.517332	1.14043	0.7005	1.01178	0	nontarget
ADCY9	Adcy9	ENSG00000162104.5	16	4003388	4166186	77.3588	0.557656	417.8	4178	162798	10	0	59093	2	1	2	1	-1.38514	-0.397558	-0.49715	0.460731	0.119734	0	nontarget
ADD2	Add2	ENSG00000075340.18	2	70834750	70995357	76.4169	0.568405	166.6	2499	160607	15	0	59064	0	4	0	0	0.754907	0.856005	0.795542	-0.141477	0.208495	0	nontarget
ADIPOR1	Adipor1	ENSG00000159346.8	1	202909951	202927700	81.5982	0.526386	167.143	1170	17749	7	0	59238	1	4	0	0	0.295592	0.329431	0.0535972	-0.318716	-0.187869	0	nontarget
ADM	Adm	ENSG00000148926.5	11	10326227	10328944	57.1205	0.621039	207	621	2717	3	0	58730	2	1	0	0	-0.135471	-0.0571564	-0.765157	0.278952	-0.129852	0	nontarget
ADNP2	Adnp2	ENSG00000101544.4	18	77866915	77905406	75.329	0.434832	1138	3414	38491	3	0	58871	3	5	0	0	-0.282699	-0.243303	-1.2361	-1.03401	-1.20783	0	nontarget
ADORA2B	Adora2b	ENSG00000170425.3	17	15848231	15879060	61.3258	0.577169	505.5	1011	30829	2	2	58989	0	13	0	0	-0.022681	0.081357	0.850532	-1.57932	-1.0817	1	nontarget
ADPGK	Adpgk	ENSG00000159322.13	15	73043710	73078187	73.1692	0.504203	202.143	1415	34477	7	2	58981	1	0	0	0	0.484034	0.544885	0.689079	1.52993	1.36038	0	nontarget
ADPRHL2	Adprhl2	ENSG00000116863.10	1	36554476	36559533	77.1584	0.576397	182.2	911	5057	5	0	59175	0	0	0	0	0.141115	0.177237	0.469306	0.830439	0.937253	0	nontarget
ADPRM	Adprm	ENSG00000170222.11	17	10600911	10614550	90.6163	0.431991	353	1059	13639	3	0	59058	2	11	0	0	0.192131	0.175763	-0.406991	-1.6791	-1.35316	0	nontarget
ADRA2B	Adra2b	ENSG00000222040.3	2	96778707	96781984	38.8298	0.638724	1347	1347	3277	1	3	57799	2	2	0	0	-0.280641	-0.148329	-0.0498069	0.616054	0.242518	0	nontarget
ADRB1	Adrb1	ENSG00000043591.4	10	115803806	115806667	37.3922	0.719639	1440	1440	2861	1	0	59425	0	0	0	0	-0.499009	-0.412037	-0.0642506	0.253411	0.245531	0	nontarget
ADSL	Adsl	ENSG00000239900.7	22	40742507	40786467	112.692	0.482963	119.846	1558	43960	13	0	59024	1	5	1	3	0.162784	-1.04419	0.703503	-0.0603575	0.247074	0	nontarget
AEN	Aen	ENSG00000181026.13	15	89164527	89175513	74.4282	0.619471	353.333	1060	10986	3	0	58574	0	0	0	0	-0.0160413	0.0162461	0.352297	0.711671	0.795838	0	nontarget
AFAP1L2	Afap1l2	ENSG00000169129.10	10	116054583	116164515	85.4032	0.548576	147.059	2500	109932	17	0	58948	1	0	1	0	0.024252	0.995591	0.429573	1.23209	1.10655	0	nontarget
AFMID	Afmid	ENSG00000183077.11	17	76183398	76203782	64.4222	0.556336	113.273	1246	20384	11	0	59047	11	16	11	15	-2.84641	-2.87279	-2.62354	-2.196	-2.42205	0	nontarget
AFTPH	Aftph	ENSG00000119844.10	2	64751465	64820139	108.498	0.464452	318.333	2865	68674	9	0	59230	0	6	0	2	0.681065	-0.838868	0.950127	-0.525771	-0.0476349	0	nontarget
AGAP1	Agap1	ENSG00000157985.13	2	236402733	237040444	96.1816	0.571063	149	2682	637711	18	0	59126	3	5	1	1	0.618031	0.836975	-0.171168	-0.112495	-0.121008	0	nontarget
AGAP2	Agap2	ENSG00000135439.7	12	58118980	58135940	100.64	0.569581	226.824	3856	16960	17	0	59143	0	10	0	0	0.986558	0.92687	1.08785	-1.03985	-0.461123	0	nontarget
AGBL2	Agbl2	ENSG00000165923.11	11	47681143	47736941	95.8468	0.426748	167.118	2841	55798	17	0	59029	24	14	24	12	-2.84641	-2.87279	-2.62354	-1.55684	-2.45276	0	nontarget
AGBL5	Agbl5	ENSG00000084693.11	2	27265232	27293490	111.08	0.560177	198.467	2977	28258	15	0	59261	2	3	1	1	0.139407	0.184116	0.19569	0.413601	0.390925	0	nontarget
AGL	Agl	ENSG00000162688.11	1	100315640	100389579	96.6426	0.399358	146.303	4828	73939	33	0	58522	11	7	10	2	-2.84641	0.450419	-1.91265	-0.0997884	-0.728402	0	nontarget
AGO1	Ago1	ENSG00000092847.6	1	36335409	36395211	90.4359	0.548274	141.474	2688	59802	19	0	59009	0	0	0	0	1.06821	1.09045	1.0873	1.3349	1.54683	0	nontarget
AGO3	Ago3	ENSG00000126070.14	1	36396319	36538101	81.6563	0.451957	141.947	2697	141782	19	0	59007	2	0	2	0	-0.616626	1.15402	0.060119	1.27603	0.909517	0	nontarget
AGO4	Ago4	ENSG00000134698.10	1	36273773	36323491	99.5585	0.46393	157	2669	49718	17	0	59069	1	0	1	0	0.190763	1.07268	0.644033	1.36898	1.30133	0	nontarget
AGPAT3	Agpat3	ENSG00000160216.14	21	45285067	45406417	99.989	0.554085	153.125	1225	121350	8	1	59011	2	8	0	3	0.783952	-1.24499	0.187896	-0.646518	-0.39352	1	nontarget
AGRN	Agrn	ENSG00000188157.9	1	955503	991496	54.5111	0.667212	164.206	5583	35993	34	0	58955	3	10	1	1	0.566129	0.76575	-0.195411	-0.871383	-0.676226	0	nontarget
AGRP	Agrp	ENSG00000159723.4	16	67516474	67517716	81.826	0.642462	139	417	1242	3	0	58930	0	13	0	0	0.21537	0.209952	0.538285	-1.91349	-1.36835	0	nontarget
AGTRAP	Agtrap	ENSG00000177674.11	1	11796141	11814859	94.2491	0.583619	117.5	705	18718	6	0	58948	3	2	1	0	-0.458219	0.443184	-0.669058	0.33629	-0.0516779	0	nontarget
AHNAK	Ahnak	ENSG00000124942.9	11	62201016	62323707	47.8258	0.584714	107.6	538	122691	5	0	58768	0	1	0	0	-0.0490647	0.129105	0.234312	0.295019	0.398553	0	nontarget
AHSA1	Ahsa1	ENSG00000100591.3	14	77924213	77935817	86.8446	0.479264	128.875	1031	11604	8	0	58836	0	0	0	0	0.4662	0.477673	0.732976	1.01946	1.19063	0	nontarget
AIDA	Aida	ENSG00000186063.8	1	222841355	222886552	73.1425	0.409241	98.1	981	45197	10	1	59037	7	2	2	2	-0.953881	-0.667601	-1.55067	0.633598	-0.325826	1	nontarget
AIFM2	Aifm2	ENSG00000042286.10	10	71857979	71892690	80.2945	0.585933	147.125	1177	34711	8	0	58979	0	0	0	0	0.392803	0.43034	0.629245	0.961704	1.09493	0	nontarget
AIFM3	Aifm3	ENSG00000183773.11	22	21319396	21335649	67.3509	0.601905	101.4	2028	16253	20	7	58937	19	47	0	0	1.81144	1.75988	-1.14443	-1.26665	-0.922845	1	nontarget
AIM2	Aim2	ENSG00000163568.9	1	159032274	159116886	105.928	0.390411	212.4	1062	84612	5	0	59053	0	1	0	0	0.697836	0.633921	0.988328	0.755575	1.06289	0	nontarget
AIP	Aip	ENSG00000110711.5	11	67250512	67258574	68.3421	0.609438	228.833	1373	8062	6	0	58824	0	4	0	0	0.112513	0.156967	0.416624	-0.449993	-0.168726	0	nontarget
AIPL1	Aipl1	ENSG00000129221.10	17	6297013	6338519	76.4349	0.593646	181.6	908	41506	5	1	58972	0	3	0	0	0.315141	0.372897	0.807954	0.142232	0.42622	0	nontarget
AJAP1	Ajap1	ENSG00000196581.6	1	4714792	4852594	96.7508	0.536034	253.2	1266	137802	5	0	59153	0	2	0	1	0.380875	-0.360585	0.662553	0.243124	0.506571	0	nontarget
AK5	Ak5	ENSG00000154027.14	1	77747736	78025651	60.1438	0.458364	124.933	1874	277915	15	0	59085	0	3	0	1	0.745187	0.151536	0.735272	0.0356248	0.349511	0	nontarget
AK7	Ak7	ENSG00000140057.4	14	96858448	96955764	71.1992	0.439863	128.706	2188	97316	17	0	58931	2	2	2	0	-0.822354	0.960951	-0.0838468	0.466073	0.3154	0	nontarget
AKAP1	Akap1	ENSG00000121057.8	17	55162453	55198710	110.639	0.540335	279.5	2795	36257	10	0	58846	0	0	0	0	0.719173	0.641312	0.978535	1.20574	1.41395	0	nontarget
AKAP10	Akap10	ENSG00000108599.10	17	19807615	19881656	73.7934	0.426072	142.071	1989	74041	14	1	59000	1	4	0	0	0.894022	0.955127	0.659308	0.163766	0.384309	1	nontarget
AKAP5	Akap5	ENSG00000179841.8	14	64932217	64941221	115.544	0.402014	1290	1290	9004	1	0	58534	0	0	0	0	0.209697	0.124948	0.712401	0.781363	0.988245	0	nontarget
AKAP6	Akap6	ENSG00000151320.6	14	32798479	33300567	85.9807	0.457376	601.167	7214	502088	12	0	59012	1	0	1	0	-0.199721	0.804986	0.140766	0.908265	0.76774	0	nontarget
AKAP8L	Akap8l	ENSG00000011243.13	19	15490859	15529952	68.3777	0.558907	140	1820	39093	13	0	59055	0	1	0	0	0.512461	0.591751	0.66246	0.633213	0.8231	0	nontarget
AKIP1	Akip1	ENSG00000166452.7	11	8932686	8941631	75.5099	0.505495	152	760	8945	5	0	58885	0	3	0	0	0.128375	0.180199	0.467704	-0.164998	0.103135	0	nontarget
AKR1A1	Akr1a1	ENSG00000117448.9	1	46016215	46035721	90.3638	0.534415	131	1048	19506	8	0	59190	2	11	2	2	-1.21103	-0.965295	-0.253829	-1.47619	-1.15316	0	nontarget
AKR1E2	Akr1e1	ENSG00000165568.13	10	4828821	4890254	84.2464	0.482823	103.2	1032	61433	10	0	59058	0	6	0	6	0.595241	-2.86148	0.785798	-0.612757	-0.177328	0	nontarget
AKT1	Akt1	ENSG00000142208.11	14	105235686	105262088	61.539	0.598178	117	1521	26402	13	0	58903	0	4	0	3	0.496519	-1.47721	0.637012	-0.242994	0.0661563	0	nontarget
AKT1S1	Akt1s1	ENSG00000204673.6	19	50372295	50381716	62.4711	0.619738	155.333	932	9421	6	1	58885	0	4	0	1	0.259027	-0.456874	0.741185	-0.14804	0.152309	0	nontarget
AKT2	Akt2	ENSG00000105221.12	19	40736224	40791443	71.1805	0.567536	134.312	2149	55219	16	0	59211	0	3	0	0	0.718691	0.796866	0.793542	0.133156	0.436983	0	nontarget
AKTIP	Aktip	ENSG00000166971.12	16	53524952	53538323	78.1558	0.444961	129.667	1167	13371	9	0	59318	0	1	0	0	0.473931	0.500448	0.715181	0.624074	0.854117	0	nontarget
ALCAM	Alcam	ENSG00000170017.8	3	105085753	105295744	96.2424	0.427986	123.333	1850	209991	15	0	59025	4	1	3	0	-1.22363	1.21029	-0.597011	0.948095	0.340959	0	nontarget
ALDH16A1	Aldh16a1	ENSG00000161618.5	19	49956426	49974305	82.7046	0.661002	143.938	2303	17879	16	1	59069	2	13	0	0	1.12545	1.10459	0.355806	-1.21613	-0.774039	1	nontarget
ALDH18A1	Aldh18a1	ENSG00000059573.4	10	97365696	97416463	118.202	0.507729	146.471	2490	50767	17	0	59122	1	0	0	0	1.30055	1.21839	0.868094	1.55143	1.51395	0	nontarget
ALDH1A3	Aldh1a3	ENSG00000184254.12	15	101417919	101456831	75.5172	0.530858	126	1512	38912	12	1	59038	1	15	0	0	0.686066	0.756664	0.51291	-1.69633	-1.14899	1	nontarget
ALDH1L2	Aldh1l2	ENSG00000136010.9	12	105413568	105478355	103.339	0.452336	129.818	2856	64787	22	0	58718	24	25	1	0	0.533269	1.41927	-2.62354	-2.41452	-2.47163	0	nontarget
ALDH4A1	Aldh4a1	ENSG00000159423.12	1	19197926	19229275	56.6325	0.598225	123.286	1726	31349	14	0	58922	2	1	0	0	0.492978	0.592511	-0.377807	0.615697	0.268226	0	nontarget
ALDH6A1	Aldh6a1	ENSG00000119711.8	14	74523553	74551196	72.2211	0.47105	134.067	2011	27643	15	0	58913	3	2	0	0	0.688555	0.746361	-0.594808	0.40227	0.0318158	0	nontarget
ALDOC	Aldoc	ENSG00000109107.9	17	26900133	26904282	118.645	0.550946	142.875	1143	4149	8	1	58990	0	5	0	0	0.953371	0.855816	1.44405	0.140774	0.621332	1	nontarget
ALG11	Alg11	ENSG00000253710.1	13	52586534	52603800	98.7829	0.461945	1012.25	4049	17266	4	0	58767	7	11	0	0	-0.00640799	-0.0563188	-2.23387	-1.84994	-2.02496	0	nontarget
ALG12	Alg12	ENSG00000182858.9	22	50293877	50312106	77.3897	0.584327	233.778	2104	18229	9	0	58935	2	2	1	0	-0.579124	0.355843	-0.418868	0.220817	-0.00509441	0	nontarget
ALG14	Alg14	ENSG00000172339.9	1	95439963	95538501	81.635	0.487512	168.75	675	98538	4	0	59153	0	0	0	0	0.196459	0.273256	0.507675	0.8281	0.96016	0	nontarget
ALG5	Alg5	ENSG00000120697.4	13	37523912	37574398	67.0496	0.44277	103.5	1035	50486	10	0	59064	3	2	0	1	0.455352	-0.244696	-0.747002	0.261619	-0.1269	0	nontarget
ALG6	Alg6	ENSG00000088035.11	1	63833261	63904233	94.5305	0.368189	118.571	1660	70972	14	0	59109	1	2	1	0	0.274782	1.13605	0.720208	0.661289	0.821088	0	nontarget
ALG8	Alg8	ENSG00000159063.8	11	77811982	77850706	65.3977	0.417158	133	1729	38724	13	0	58901	2	3	2	1	-1.08012	-0.105572	-0.231043	0.0522639	-0.0271815	0	nontarget
ALKBH2	Alkbh2	ENSG00000189046.6	12	109525996	109531436	121.054	0.550467	268	804	5440	3	0	58898	0	2	0	0	0.49845	0.392383	0.924914	0.4414	0.748621	0	nontarget
ALKBH3	Alkbh3	ENSG00000166199.8	11	43902361	43941816	88.092	0.488582	101.667	915	39455	9	0	59021	0	5	0	0	0.566435	0.594904	0.790197	-0.400092	0.00435963	0	nontarget
ALKBH6	Alkbh6	ENSG00000239382.6	19	36500022	36505141	76.923	0.565236	116.333	698	5119	6	0	59065	0	8	0	0	0.22875	0.272407	0.527319	-1.16509	-0.733241	0	nontarget
ALKBH8	Alkbh8	ENSG00000137760.10	11	107373452	107436472	37.4465	0.42352	186.273	2049	63020	11	0	59043	0	7	0	4	0.172447	-2.27754	0.419097	-1.08577	-0.700041	0	nontarget
ALMS1	Alms1	ENSG00000116127.13	2	73612886	73837920	101.354	0.4382	561.136	12345	225034	22	1	59006	5	5	5	2	-2.08007	0.101816	-0.592444	0.284889	-0.00583569	1	nontarget
ALOX12	Alox12	ENSG00000108839.7	17	6899384	6914055	94.6634	0.563543	151.923	1975	14671	13	0	58853	14	16	0	0	0.788882	0.769206	-2.62354	-1.93134	-2.25744	0	nontarget
ALOX12B	Alox12b	ENSG00000179477.5	17	7975954	7991021	87.228	0.589059	172.267	2584	15067	15	0	59076	1	6	1	2	-0.102416	-0.660409	0.384697	-0.477652	-0.202138	0	nontarget
ALOX15B	Alox8	ENSG00000179593.11	17	7942335	7952452	60.3098	0.591597	151.071	2115	10117	14	0	59234	0	4	0	1	0.480178	-0.226556	0.625634	-0.243419	0.0624559	0	nontarget
ALOXE3	Aloxe3	ENSG00000179148.5	17	7999218	8022365	75.0115	0.586555	173.625	2778	23147	16	0	58999	1	6	1	5	-0.193224	-2.31955	0.275375	-0.552789	-0.301932	0	nontarget
AMBRA1	Ambra1	ENSG00000110497.10	11	46417964	46615675	80.0794	0.544263	235.235	3999	197711	17	0	58769	1	5	1	0	-0.0800776	0.924918	0.300905	-0.347564	-0.12788	0	nontarget
AMHR2	Amhr2	ENSG00000135409.6	12	53817639	53825318	92.2255	0.589119	162.545	1788	7679	11	0	58959	2	1	2	1	-1.03112	-0.140011	-0.137382	0.7669	0.483837	0	nontarget
AMIGO1	Amigo1	ENSG00000181754.6	1	110046797	110052360	92.8562	0.560779	1488	1488	5563	1	0	58250	0	0	0	0	-0.283146	-0.246001	0.207956	0.444788	0.52599	0	nontarget
AMIGO2	Amigo2	ENSG00000139211.5	12	47469490	47473734	92.5732	0.468274	1575	1575	4244	1	0	58986	0	0	0	0	-0.271948	-0.238546	0.230369	0.427663	0.531072	0	nontarget
AMN1	Amn1	ENSG00000151743.6	12	31824071	31882108	58.0735	0.41026	126.167	757	58037	6	0	58840	1	0	0	0	0.191339	0.283309	-0.0576374	0.797552	0.611468	0	nontarget
AMOTL1	Amotl1	ENSG00000166025.13	11	94439597	94609918	50.3751	0.551623	213	2982	170321	14	0	58970	0	7	0	3	0.37323	-1.51294	0.4792	-1.00815	-0.62859	0	nontarget
AMPD3	Ampd3	ENSG00000133805.11	11	10329860	10529126	114.001	0.553068	161.938	2591	199266	16	0	58992	1	10	0	2	1.27147	-0.197198	0.761588	-0.913029	-0.413923	0	nontarget
AMZ2	Amz2	ENSG00000196704.7	17	66243715	66253297	92.1149	0.423454	187.833	1127	9582	6	0	59040	2	4	0	3	0.469256	-1.61968	-0.215612	-0.226558	-0.210427	0	nontarget
ANAPC16	Anapc16	ENSG00000166295.4	10	73975787	73995618	90.1786	0.492925	117	351	19831	3	0	59082	0	0	0	0	0.214448	0.229109	0.582996	0.895623	1.04118	0	nontarget
ANAPC5	Anapc5	ENSG00000089053.8	12	121746048	121837699	80.2472	0.480608	142.941	2430	91651	17	0	59313	2	3	2	0	-0.794851	0.959775	-0.0507913	0.220276	0.159969	0	nontarget
ANAPC7	Anapc7	ENSG00000196510.8	12	110810705	110841535	103.476	0.474791	172.364	1896	30830	11	0	58906	2	3	1	0	-0.108589	0.756352	0.0194123	0.245018	0.210343	0	nontarget
ANGPTL1	Angptl1	ENSG00000116194.8	1	178818840	178840187	89.2438	0.425078	375	1500	21347	4	0	59039	1	0	0	0	0.229735	0.210664	0.0700991	0.84844	0.701158	0	nontarget
ANGPTL3	Angptl3	ENSG00000132855.4	1	63063158	63071830	85.7143	0.368692	203.571	1425	8672	7	0	59045	2	0	0	0	0.596334	0.538903	-0.134078	1.04056	0.678067	0	nontarget
ANGPTL4	Angptl4	ENSG00000167772.7	19	8428173	8439257	69.581	0.619252	180.429	1263	11084	7	0	58823	6	6	6	1	-2.84641	-0.513864	-1.90443	-0.822954	-1.28954	0	nontarget
ANGPTL6	Angptl6	ENSG00000130812.6	19	10203014	10213472	97.1786	0.613708	213.75	855	10458	4	0	58923	0	1	0	0	0.355596	0.316571	0.68851	0.604158	0.811292	0	nontarget
ANGPTL7	Angptl7	ENSG00000171819.4	1	11249398	11256038	83.2434	0.54017	214.2	1071	6640	5	0	59001	0	0	0	0	0.170001	0.192763	0.513835	0.852457	0.975201	0	nontarget
ANK3	Ank3	ENSG00000151150.16	10	61786056	62493248	85.6605	0.458347	311.444	14015	707192	45	0	59116	1	1	1	1	1.75021	2.13166	1.22048	1.59852	1.66308	0	nontarget
ANKEF1	Ankef1	ENSG00000132623.11	20	9966774	10037410	86.494	0.425645	265	2385	70636	9	0	59093	1	2	1	1	-0.377845	-0.250598	0.229932	0.301691	0.361273	0	nontarget
ANKLE1	Ankle1	ENSG00000160117.10	19	17392454	17398455	57.6602	0.638921	264	1848	6001	7	0	58831	1	4	0	0	0.0829363	0.132391	-0.167419	-0.482436	-0.413559	0	nontarget
ANKRD11	Ankrd11	ENSG00000167522.10	16	89334038	89556969	72.9412	0.597496	784.091	8625	222931	11	0	58929	1	8	0	1	0.226808	-0.455993	-0.187907	-1.31438	-1.06396	0	nontarget
ANKRD13A	Ankrd13a	ENSG00000076513.12	12	110436991	110477568	100.51	0.46507	129	1806	40577	14	0	58927	1	0	0	0	0.985523	0.958884	0.583865	1.31709	1.24055	0	nontarget
ANKRD13B	Ankrd13b	ENSG00000198720.8	17	27916787	27941779	52.0035	0.602419	128.154	1666	24992	13	1	59048	1	1	0	0	0.530816	0.641636	0.347861	0.858078	0.763752	0	nontarget
ANKRD13D	Ankrd13d	ENSG00000172932.10	11	67056018	67069956	55.7293	0.613146	130.077	1691	13938	13	0	58964	1	1	1	0	-0.472659	0.52222	0.0546264	0.590599	0.4787	0	nontarget
ANKRD16	Ankrd16	ENSG00000134461.11	10	5903580	5931869	70.1364	0.546001	161.143	1128	28289	7	0	58964	2	3	1	1	-0.730896	-0.530302	-0.532263	-0.149996	-0.304101	0	nontarget
ANKRD39	Ankrd39	ENSG00000213337.4	2	97502348	97523832	59.5025	0.617054	128.455	1413	21484	11	3	58704	7	11	0	0	0.827509	0.884895	-0.93814	-0.437677	-0.632872	1	nontarget
ANKRD40	Ankrd40	ENSG00000154945.6	17	48770551	48785285	96.1301	0.482505	227.4	1137	14734	5	0	59085	0	0	0	0	0.3416	0.321255	0.692138	0.96366	1.13302	0	nontarget
ANKRD42	Ankrd42	ENSG00000137494.9	11	82904781	82971736	74.4307	0.462081	231.3	2313	66955	10	0	58904	1	1	1	0	-0.512045	0.45424	0.0850474	0.548132	0.483128	0	nontarget
ANKRD44	Ankrd44	ENSG00000065413.12	2	197831741	198175897	89.9578	0.460204	121.444	3279	344156	27	0	59019	0	2	0	1	1.69801	1.0375	1.41221	0.846259	1.23634	0	nontarget
ANKRD49	Ankrd49	ENSG00000168876.4	11	94226795	94232749	98.743	0.42858	425	850	5954	2	0	58804	0	1	0	0	0.217919	0.175879	0.648375	0.490673	0.727658	0	nontarget
ANKRD52	Ankrd52	ENSG00000139645.9	12	56631591	56652175	60.8296	0.558135	118.393	3315	20584	28	0	58946	0	1	0	0	1.1627	1.26799	1.05039	0.981781	1.21567	0	nontarget
ANKRD54	Ankrd54	ENSG00000100124.8	22	38226862	38245334	78.5644	0.584138	101.125	809	18472	8	0	58919	0	2	0	0	0.399792	0.441336	0.635484	0.274604	0.514709	0	nontarget
ANKS1B	Anks1b	ENSG00000185046.14	12	99120235	100378432	59.3591	0.449724	152.643	4274	1258197	28	0	59024	8	9	1	0	1.39246	2.17562	-1.44016	-0.80177	-0.984997	0	nontarget
ANKS3	Anks3	ENSG00000168096.10	16	4746513	4784379	70.2745	0.611357	154.333	2315	37866	15	0	59130	4	2	0	0	0.680831	0.731611	-0.995454	0.396803	-0.180066	0	nontarget
ANKZF1	Ankzf1	ENSG00000163516.9	2	220094479	220101391	92.6991	0.550731	188	2444	6912	13	0	58824	1	1	0	0	0.717619	0.694674	0.358178	0.793942	0.761832	0	nontarget
ANO1	Ano1	ENSG00000131620.13	11	69924408	70035634	49.1598	0.5322	118.778	3207	111226	27	0	59000	0	6	0	2	1.04175	-0.236527	0.923573	-0.426849	-0.0165256	0	nontarget
ANO6	Ano6	ENSG00000177119.11	12	45609770	45834187	91.313	0.434152	136.762	2872	224417	21	0	59061	1	7	1	7	0.472672	-2.46182	0.735205	-0.451781	-0.0451893	0	nontarget
ANPEP	Anpep	ENSG00000166825.9	15	90328120	90358633	103.517	0.563656	157.263	2988	30513	19	0	59160	4	4	0	2	1.19628	-0.305496	-0.523795	0.214207	-0.0433165	0	nontarget
ANTXR1	Antxr1	ENSG00000169604.15	2	69240310	69476459	108.994	0.464884	91.5	1647	236149	18	0	59092	1	5	1	2	0.555541	0.0420868	0.872704	0.0571826	0.396397	0	nontarget
ANXA2	Anxa2	ENSG00000182718.12	15	60639333	60695082	59.1691	0.475598	103.25	1239	55749	12	0	59178	1	5	1	1	-0.474215	-0.228667	0.0723199	-0.518766	-0.33883	0	nontarget
ANXA4	Anxa4	ENSG00000196975.10	2	69871557	70053596	68.6758	0.49235	86.5	1038	182039	12	0	59081	0	3	0	0	0.614481	0.769609	0.699089	0.0234517	0.327339	0	nontarget
ANXA9	Anxa9	ENSG00000143412.5	1	150954493	150968110	83.9486	0.554937	92.5	1110	13617	12	0	59127	7	9	5	6	-2.84641	-2.80481	-1.83704	-1.08509	-1.35541	0	nontarget
AOC2	Aoc2	ENSG00000131480.4	17	40996617	41002724	142.687	0.560635	573.75	2295	6107	4	0	59059	0	1	0	0	0.685995	0.474444	1.18863	0.934779	1.23458	0	nontarget
AP1B1	Ap1b1	ENSG00000100280.12	22	29723669	29819168	83.4303	0.556281	144.417	3466	95499	24	1	58602	19	14	15	13	-2.84641	-2.87279	-2.62354	-1.22832	-1.89969	1	nontarget
AP1G2	Ap1g2	ENSG00000213983.7	14	24028774	24037279	64.2501	0.574107	132.8	2656	8505	20	0	58932	2	0	1	0	-0.0903406	0.893337	-0.147665	1.18025	0.740728	0	nontarget
AP1M1	Ap1m1	ENSG00000072958.4	19	16308389	16346160	95.0596	0.574255	117.909	1297	37771	11	0	58743	0	1	0	0	0.743992	0.741565	0.916546	0.808531	1.05323	0	nontarget
AP1M2	Ap1m2	ENSG00000129354.7	19	10683347	10697991	35.8251	0.54254	143.909	1583	14644	11	0	58976	0	1	0	0	0.0450801	0.197307	0.318152	0.390888	0.498217	0	nontarget
AP1S3	Ap1s3	ENSG00000152056.12	2	224616403	224702744	39.4788	0.42004	123	738	86341	6	0	58758	0	0	0	0	-0.00493753	0.153507	0.309389	0.688518	0.772491	0	nontarget
AP2A2	Ap2a2	ENSG00000183020.9	11	924894	1012239	54.7976	0.543292	165.727	3646	87345	22	0	59002	1	5	0	3	0.798236	-1.12298	0.24731	-0.33825	-0.152878	0	nontarget
AP2B1	Ap2b1	ENSG00000006125.12	17	33905065	34053436	92.3868	0.458038	142	2982	148371	21	1	59013	0	3	0	1	1.43505	0.7024	1.56656	0.724816	1.15828	0	nontarget
AP2S1	Ap2s1	ENSG00000042753.7	19	47341393	47354249	61.1865	0.54426	85.1667	511	12856	6	0	58969	1	6	0	1	0.0719099	-0.611544	-0.153679	-0.895276	-0.716153	0	nontarget
AP3B2	Ap3b2	ENSG00000103723.8	15	83328033	83378666	48.7638	0.552204	125.741	3395	50633	27	2	58945	0	4	0	2	1.28779	-0.0267551	1.64603	0.708058	1.07254	0	nontarget
AP3D1	Ap3d1	ENSG00000065000.11	19	2100988	2164464	69.9969	0.573509	122.069	3540	63476	29	0	58985	0	2	0	0	1.33467	1.43295	1.16631	0.740524	1.04733	0	nontarget
AP3M1	Ap3m1	ENSG00000185009.8	10	75881524	75910821	85.8058	0.418625	163.125	1305	29297	8	0	58928	2	0	0	0	0.544197	0.5377	-0.202711	1.03089	0.637708	0	nontarget
AP4E1	Ap4e1	ENSG00000081014.6	15	51200869	51298097	76.8254	0.395166	172.714	3627	97228	21	0	59057	1	2	1	0	0.277261	1.21509	0.607388	0.622989	0.740832	0	nontarget
AP4S1	Ap4s1	ENSG00000100478.10	14	31494312	31562818	95.4967	0.384029	115.667	694	68506	6	0	58865	3	1	1	0	-0.210889	0.667046	-0.458694	0.740041	0.30565	0	nontarget
AP5M1	Ap5m1	ENSG00000053770.7	14	57735627	57756797	103.249	0.389474	209.75	1678	21170	8	0	59173	2	0	2	0	-0.90247	0.694343	0.0574302	1.19542	0.863716	0	nontarget
AP5S1	Ap5s1	ENSG00000125843.6	20	3801178	3805949	60.1383	0.615358	307.5	615	4771	2	0	58983	0	2	0	0	-0.209293	-0.13052	0.192978	-0.095684	0.0591778	0	nontarget
APAF1	Apaf1	ENSG00000120868.9	12	99038919	99129204	91.9564	0.407259	152.538	3966	90285	26	0	59162	1	0	1	0	0.665708	1.56899	0.909128	1.56923	1.55134	0	nontarget
APBB1	Apbb1	ENSG00000166313.14	11	6416355	6440644	92.7171	0.582353	205.462	2671	24289	13	0	58884	0	2	0	1	0.73485	-0.074124	0.89397	0.46944	0.758573	0	nontarget
APC2	Apc2	ENSG00000115266.7	19	1446300	1473243	36.503	0.654224	499.786	6997	26943	14	0	58875	0	2	0	0	0.102719	0.172816	0.293743	0.0567472	0.196319	0	nontarget
APH1A	Aph1a	ENSG00000117362.8	1	150237804	150241980	52.0513	0.571984	121.571	851	4176	7	0	58818	0	2	0	0	0.0187719	0.128236	0.32539	0.051063	0.22273	0	nontarget
APIP	Apip	ENSG00000149089.8	11	34874641	34938046	85.7898	0.450604	112.286	786	63405	7	0	59125	1	4	0	0	0.480832	0.516327	0.197969	-0.237196	-0.0629688	0	nontarget
APLF	Aplf	ENSG00000169621.5	2	68694693	68858004	75.7447	0.41139	166.222	1496	163311	9	0	59295	37	3	0	0	0.579736	0.659349	-2.62354	-0.00501836	-2.47163	0	nontarget
APLP1	Aplp1	ENSG00000105290.7	19	36358801	36370693	79.5846	0.610629	127.062	2033	11892	16	0	58935	1	1	1	1	-0.0600141	0.0835097	0.385624	0.836388	0.793825	0	nontarget
APMAP	Apmap	ENSG00000101474.7	20	24943561	24973615	75.1992	0.544364	133.2	1332	30054	10	0	59133	0	6	0	0	0.423367	0.483536	0.635962	-0.703726	-0.310132	0	nontarget
APOA2	Apoa2	ENSG00000158874.7	1	161192082	161193421	80.2862	0.550279	155.75	623	1339	4	0	59107	0	2	0	0	0.11613	0.150151	0.471096	0.130388	0.349634	0	nontarget
APOBEC1	Apobec1	ENSG00000111701.6	12	7801996	7818499	93.6645	0.470743	148.2	741	16503	5	1	58924	3	8	2	4	-1.18129	-2.07738	-0.362331	-0.775186	-0.655768	1	nontarget
APOBEC3H	Apobec3	ENSG00000100298.11	22	39493229	39500072	102.405	0.532415	144	576	6843	4	0	59073	4	3	1	1	-0.527548	-0.434653	-1.02254	0.0408773	-0.391166	0	nontarget
APOBEC4	Apobec4	ENSG00000173627.6	1	183615541	183622451	107.108	0.431143	1110	1110	6910	1	0	58905	0	2	0	0	0.0749491	0.0340778	0.573157	0.0161627	0.295639	0	nontarget
APOC1	Apoc1	ENSG00000130208.5	19	45417504	45422606	101.913	0.52028	137.667	413	5102	3	0	59046	24	1	24	1	-2.84641	-0.492283	-2.62354	0.617117	-2.19802	0	nontarget
APOE	Apoe	ENSG00000130203.5	19	45409011	45412650	66.4342	0.637222	331.333	994	3639	3	0	58990	0	1	0	0	-0.0604169	-0.018983	0.303425	0.305751	0.433287	0	nontarget
APOF	Apof	ENSG00000175336.8	12	56754353	56756607	59.228	0.515222	493.5	987	2254	2	0	58681	0	2	0	0	-0.368567	-0.264797	0.0955781	-0.206779	-0.0543006	0	nontarget
APOL6	Apol6	ENSG00000221963.5	22	36044442	36064456	125.049	0.514244	522	1044	20014	2	1	58850	0	3	0	0	0.546642	0.446907	1.22223	0.375335	0.755277	0	nontarget
APOLD1	Apold1	ENSG00000178878.8	12	12878851	12982909	95.3409	0.458043	161	2254	104058	14	0	58939	0	2	0	0	0.93655	0.948036	1.03933	0.546377	0.88375	0	nontarget
APP	App	ENSG00000142192.16	21	27252861	27543446	95.3035	0.511888	134.438	2151	290585	16	0	59034	2	2	1	0	0.227077	1.23041	0.0928494	0.591073	0.469764	0	nontarget
APPL2	Appl2	ENSG00000136044.7	12	105567074	105630016	89.0509	0.446347	112.8	2256	62942	20	0	58797	23	78	23	78	-2.84641	-2.87279	-2.62354	-2.53125	-2.47163	0	nontarget
APRT	Aprt	ENSG00000198931.6	16	88875747	88878352	52.8906	0.656567	138	690	2605	5	0	58789	6	19	0	0	0.053315	0.117878	-2.05067	-2.53125	-2.47163	0	nontarget
AQP11	Aqp11	ENSG00000178301.3	11	77300436	77321400	103.571	0.448291	278	834	20964	3	0	58823	2	5	0	0	0.354127	0.30662	-0.249644	-0.497664	-0.422461	0	nontarget
AQP5	Aqp5	ENSG00000161798.6	12	50355653	50359464	77.4217	0.621748	205.5	822	3811	4	1	58941	0	1	0	0	0.283656	0.306402	0.804727	0.744341	0.932624	0	nontarget
AQP9	Aqp9	ENSG00000103569.5	15	58430368	58478110	127.033	0.4816	154	924	47742	6	0	59034	10	1	0	0	0.847254	0.733169	-2.19292	0.971765	-0.529527	0	nontarget
ARAP1	Arap1	ENSG00000186635.10	11	72396114	72504644	74.9703	0.610387	149.121	4921	108530	33	0	59132	4	3	2	0	-0.105597	1.67649	-0.451483	0.579893	0.197155	0	nontarget
AREL1	Arel1	ENSG00000119682.12	14	75120140	75179818	92.7192	0.486425	144.632	2748	59678	19	0	59011	0	1	0	0	1.10928	1.12022	1.13837	0.981561	1.27234	0	nontarget
ARFGAP1	Arfgap1	ENSG00000101199.8	20	61904137	61921142	70.4415	0.569507	110.786	1551	17005	14	0	59059	1	7	0	2	0.61505	-0.777446	0.208324	-0.796156	-0.51541	0	nontarget
ARFGAP2	Arfgap2	ENSG00000149182.10	11	47185848	47198676	116.785	0.545342	112.235	1908	12828	17	0	59139	2	4	2	2	-0.393331	-0.243969	0.406944	0.328214	0.417412	0	nontarget
ARFGEF2	Arfgef2	ENSG00000124198.8	20	47538427	47653230	96.1649	0.47261	143.385	5592	114803	39	0	58970	8	4	3	2	-0.352403	0.630282	-1.22573	0.604507	-0.102591	0	nontarget
ARFIP2	Arfip2	ENSG00000132254.8	11	6496910	6502666	74.2716	0.546385	177.143	1240	5756	7	0	58839	0	2	0	0	0.201343	0.248437	0.499562	0.158003	0.379404	0	nontarget
ARFRP1	Arfrp1	ENSG00000101246.15	20	62329996	62339377	71.5316	0.585427	111.778	1006	9381	9	0	59045	4	1	0	0	0.36539	0.420409	-1.17524	0.572796	-0.175234	0	nontarget
ARG2	Arg2	ENSG00000081181.3	14	68086515	68118437	71.4414	0.471074	140.556	1265	31922	9	0	59094	2	12	0	7	0.358586	-2.87279	-0.394291	-1.73151	-1.39467	0	nontarget
ARHGAP12	Arhgap12	ENSG00000165322.13	10	32094365	32217742	82.06	0.404723	148.444	2672	123377	18	0	58983	1	0	1	0	0.211367	1.15885	0.578895	1.29021	1.22283	0	nontarget
ARHGAP20	Arhgap20	ENSG00000137727.8	11	110447766	110583912	84.9236	0.443752	244.4	3666	136146	15	0	59079	4	0	4	0	-2.18053	0.860521	-0.861056	1.13865	0.298421	0	nontarget
ARHGAP21	Arhgap21	ENSG00000107863.12	10	24872538	25012597	75.7079	0.419087	245.92	6148	140059	25	0	58890	0	1	0	1	1.24241	0.514663	1.12072	0.9704	1.26082	0	nontarget
ARHGAP22	Arhgap22	ENSG00000128805.10	10	49654077	49864310	85.7833	0.582227	268.9	2689	210233	10	0	59017	9	8	0	0	0.564583	0.639477	-2.47259	-1.07043	-1.6158	0	nontarget
ARHGAP25	Arhgap25	ENSG00000163219.7	2	68906733	69053965	98.0546	0.507397	187.154	2433	147232	13	0	59071	0	3	0	1	0.866774	0.111936	0.976096	0.222623	0.584161	0	nontarget
ARHGAP28	Arhgap28	ENSG00000088756.8	18	6729717	6915715	73.1944	0.428357	122.5	1960	185998	16	0	58988	2	6	0	2	0.9355	-0.414232	-0.0616515	-0.51875	-0.364883	0	nontarget
ARHGAP30	Arhgap30	ENSG00000186517.9	1	161016736	161039760	97.2793	0.576837	281.5	3378	23024	12	0	58776	2	3	1	0	-0.247312	0.616452	-0.133449	0.151666	0.0719709	0	nontarget
ARHGAP31	Arhgap31	ENSG00000031081.6	3	119013220	119139561	86.1015	0.514777	367.25	4407	126341	12	0	59067	0	1	0	0	0.509984	0.544819	0.679938	0.604409	0.817767	0	nontarget
ARHGAP33	Arhgap33	ENSG00000004777.14	19	36265434	36279724	64.4336	0.616437	190.8	3816	14290	20	0	59150	0	3	0	2	0.813739	-0.601432	0.833256	0.184549	0.482322	0	nontarget
ARHGAP35	Arhgap35	ENSG00000160007.13	19	47421933	47508334	81.7804	0.501227	753	4518	86401	6	0	59137	0	0	0	0	-0.0372128	-0.00167753	0.318364	0.639491	0.740348	0	nontarget
ARHGAP9	Arhgap9	ENSG00000123329.13	12	57866038	57882597	62.3857	0.586398	144.056	2593	16559	18	0	59024	2	3	0	0	0.707227	0.781514	-0.226707	0.129195	0.0085597	0	nontarget
ARHGDIA	Arhgdia	ENSG00000141522.7	17	79825597	79829282	62.8407	0.608644	230.8	1154	3685	5	0	58767	0	1	0	0	-0.00381753	0.057433	0.329908	0.350691	0.480591	0	nontarget
ARHGDIG	Arhgdig	ENSG00000242173.4	16	318726	333003	52.1302	0.615737	144.667	868	14277	6	0	59065	1	8	0	0	0.0112366	0.107788	-0.219195	-1.31395	-1.08015	0	nontarget
ARHGEF10L	Arhgef10l	ENSG00000074964.12	1	17866330	18024369	77.4809	0.615511	144.481	3901	158039	27	0	58975	0	3	0	2	1.41482	0.0442822	1.20605	0.465864	0.828556	0	nontarget
ARHGEF12	Arhgef12	ENSG00000196914.4	11	120207787	120360645	81.0236	0.442385	119.951	4918	152858	41	0	58968	0	1	0	0	2.03768	2.15692	1.63978	1.40863	1.75898	0	nontarget
ARHGEF15	Arhgef15	ENSG00000198844.6	17	8213559	8225829	108.57	0.614618	181.333	2720	12270	15	0	59034	2	9	1	2	0.180542	-0.465857	0.210513	-0.806051	-0.486906	0	nontarget
ARHGEF16	Arhgef16	ENSG00000130762.10	1	3370990	3397677	56.2132	0.607761	130.083	1561	26687	12	0	59087	9	5	8	1	-2.84641	-0.301023	-2.60559	-0.532997	-1.42584	0	nontarget
ARHGEF17	Arhgef17	ENSG00000110237.3	11	73019334	73080136	72.3356	0.601932	311.952	6551	60802	21	0	58918	0	2	0	0	0.840177	0.875556	0.828608	0.474659	0.73011	0	nontarget
ARHGEF4	Arhgef4	ENSG00000136002.12	2	131594489	131804836	55.5636	0.59273	194.615	2530	210347	13	3	59046	4	8	0	1	0.90158	0.26442	-0.0571368	-0.00133803	-0.0822114	1	nontarget
ARHGEF40	Arhgef40	ENSG00000165801.5	14	21538429	21558399	75.7406	0.60398	218.318	4803	19970	22	0	59045	1	1	1	0	0.0732104	0.995989	0.430107	0.896504	0.853828	0	nontarget
ARID2	Arid2	ENSG00000189079.11	12	46123448	46301823	80.8197	0.429202	268.524	5639	178375	21	0	59087	0	0	0	0	1.0978	1.15147	1.03554	1.26052	1.48527	0	nontarget
ARID3A	Arid3a	ENSG00000116017.6	19	925781	975939	56.9031	0.609129	187.5	1125	50158	6	0	59015	0	7	0	3	0.0403998	-1.91311	0.328385	-1.1384	-0.783388	0	nontarget
ARID3B	Arid3b	ENSG00000179361.13	15	74833518	74890472	66.0132	0.581357	237.857	1665	56954	7	3	58994	0	0	0	0	0.56376	0.62756	1.57668	1.93205	2.03536	0	nontarget
ARID4A	Arid4a	ENSG00000032219.14	14	58765103	58840605	80.8161	0.394992	170.087	3912	75502	23	0	58959	1	1	0	0	1.31425	1.32192	0.707589	1.0307	1.08207	0	nontarget
ARID5A	Arid5a	ENSG00000196843.11	2	97202480	97218375	47.4451	0.593642	470.5	1882	15895	4	3	58876	5	4	0	0	0.0858903	0.175109	-0.859767	0.412559	-0.192907	1	nontarget
ARID5B	Arid5b	ENSG00000150347.10	10	63661059	63856703	87.5806	0.467783	373.6	3736	195644	10	0	58972	0	0	0	0	0.512937	0.565223	0.68511	0.944763	1.11616	0	nontarget
ARL1	Arl1	ENSG00000120805.9	12	101786898	101801598	65.1545	0.387342	125.4	627	14700	5	0	59032	0	1	0	1	0.250943	-0.497308	0.562513	0.46721	0.683972	0	nontarget
ARL14EP	Arl14ep	ENSG00000152219.4	11	30344598	30359774	94.0629	0.407152	267	801	15176	3	0	58821	1	1	1	0	-0.578671	0.29383	0.173938	0.550725	0.527461	0	nontarget
ARL16	Arl16	ENSG00000214087.4	17	79648204	79650954	47.081	0.599365	138.6	693	2750	5	0	58695	0	0	0	0	-0.126888	-0.0144141	0.223744	0.671592	0.712102	0	nontarget
ARL3	Arl3	ENSG00000138175.8	10	104433488	104474164	76.2576	0.447727	97.5	585	40676	6	0	58592	1	1	0	0	0.316934	0.371535	0.0624122	0.528216	0.46297	0	nontarget
ARL4C	Arl4c	ENSG00000188042.5	2	235401685	235405697	76.9619	0.549171	309.5	619	4012	2	0	58667	0	0	0	0	-0.0998953	-0.0484579	0.317714	0.685262	0.771428	0	nontarget
ARL4D	Arl4d	ENSG00000175906.4	17	41476327	41478505	54.3938	0.619902	612	612	2178	1	3	58892	0	1	0	0	0.0332874	0.119596	1.22541	1.22919	1.32153	0	nontarget
ARMC5	Armc5	ENSG00000140691.12	16	31469401	31478487	48.6175	0.653588	467.857	3275	9086	7	0	58952	0	16	0	0	-0.102232	-0.0541635	0.219874	-2.51089	-1.98568	0	nontarget
ARMC6	Armc6	ENSG00000105676.9	19	19144384	19170563	66.5102	0.578466	219.875	1759	26179	8	0	58977	1	2	1	0	-0.740873	0.236172	-0.0944648	0.119258	0.0803548	0	nontarget
ARMC7	Armc7	ENSG00000125449.2	17	73106047	73126360	64.9148	0.618717	205	615	20313	3	0	58902	3	1	0	0	-0.0460193	0.022118	-1.10039	0.326298	-0.279677	0	nontarget
ARMC9	Armc9	ENSG00000135931.13	2	232063260	232239548	94.9822	0.492204	109.632	2083	176288	19	0	58972	5	3	5	2	-2.32066	-0.145459	-0.895675	0.408939	-0.0985839	0	nontarget
ARNT	Arnt	ENSG00000143437.16	1	150782181	150849244	84.7987	0.501014	119.81	2516	67063	21	0	59074	0	3	0	1	1.13833	0.408209	1.11648	0.370687	0.742713	0	nontarget
ARNT2	Arnt2	ENSG00000172379.14	15	80696692	80890278	121.322	0.527684	122.737	2332	193586	19	0	59201	0	3	0	3	1.55082	-0.524412	1.52983	0.663255	1.11183	0	nontarget
ARNTL2	Arntl2	ENSG00000029153.10	12	27485787	27576241	77.5864	0.405799	123.5	1976	90454	16	1	59218	9	19	0	0	1.12045	1.17015	-1.79948	-1.92364	-1.76001	1	nontarget
ARPP19	Arpp19	ENSG00000128989.6	15	52839242	52862080	79.2665	0.508585	119	357	22838	3	0	59016	0	2	0	0	0.0792475	0.132397	0.446265	0.102371	0.324281	0	nontarget
ARRB2	Arrb2	ENSG00000141480.13	17	4613784	4624794	88.0239	0.557523	99.4286	1392	11010	14	1	59261	1	8	0	4	0.956751	-1.60309	0.742441	-0.532569	-0.144096	1	nontarget
ARRDC2	Arrdc2	ENSG00000105643.5	19	18111941	18124911	69.8782	0.637496	198.857	1392	12970	7	0	59106	0	3	0	2	0.261093	-1.16973	0.515609	-0.112948	0.144049	0	nontarget
ARSA	Arsa	ENSG00000100299.13	22	51061182	51066607	54.7318	0.642799	240.429	1683	5425	7	0	58857	1	4	1	1	-0.834739	-0.650809	-0.174966	-0.483637	-0.418878	0	nontarget
ARSG	Arsg	ENSG00000141337.8	17	66255323	66418872	89.3879	0.542187	142.154	1848	163549	13	0	58980	1	3	0	1	0.815894	0.105433	0.358677	0.171627	0.294088	0	nontarget
ART1	Art1	ENSG00000129744.2	11	3666358	3685646	76.2956	0.545874	252	1008	19288	4	0	58972	3	10	0	0	0.0260873	0.078549	-1.01441	-1.62141	-1.50834	0	nontarget
ART5	Art5	ENSG00000167311.9	11	3659733	3663546	55.3393	0.628302	202	1010	3813	5	0	58955	16	22	14	15	-2.84641	-2.87279	-2.62354	-2.53125	-2.47163	0	nontarget
ARV1	Arv1	ENSG00000173409.9	1	231114727	231136341	119.575	0.436812	169.2	846	21614	5	0	59085	0	5	0	0	0.740671	0.62614	1.09928	-0.215186	0.263489	0	nontarget
ARVCF	Arvcf	ENSG00000099889.9	22	19957419	20004331	53.9265	0.643216	175.941	2991	46912	17	1	59141	12	34	0	1	0.793055	0.0932253	-2.62354	-2.53125	-2.47163	1	nontarget
AS3MT	As3mt	ENSG00000214435.3	10	104629273	104661656	97.1115	0.455588	120.9	1209	32383	10	0	58974	2	1	0	0	0.74912	0.729925	-0.0359773	0.808298	0.568375	0	nontarget
ASAP2	Asap2	ENSG00000151693.5	2	9346894	9545812	82.4535	0.502976	113.893	3189	198918	28	0	59009	7	31	1	2	0.608631	0.183358	-1.37286	-2.53125	-2.32218	0	nontarget
ASAP3	Asap3	ENSG00000088280.14	1	23755056	23811061	77.1073	0.574062	118.625	2847	56005	24	0	58974	0	5	0	1	1.19613	0.481009	1.11094	-0.0922461	0.334451	0	nontarget
ASB1	Asb1	ENSG00000065802.7	2	239335383	239360891	77.718	0.57633	245.75	983	25508	4	0	58942	0	2	0	0	0.0687803	0.114373	0.416528	0.0765989	0.283638	0	nontarget
ASB13	Asb13	ENSG00000196372.8	10	5680830	5708558	75.9898	0.57939	158	632	27728	4	0	59302	0	51	0	48	0.102326	-2.87279	0.433705	-2.53125	-2.47163	0	nontarget
ASB16	Asb16	ENSG00000161664.2	17	42247815	42256451	56.695	0.644739	296.2	1481	8636	5	3	58906	0	0	0	0	0.412659	0.448166	1.47503	1.84665	1.9225	0	nontarget
ASB7	Asb7	ENSG00000183475.8	15	101142739	101191910	75.9659	0.460261	327.667	983	49171	3	1	59151	0	6	0	0	0.145324	0.212663	0.720906	-0.673614	-0.272527	1	nontarget
ASCC1	Ascc1	ENSG00000138303.13	10	73856278	73976892	90.8526	0.450702	124.222	1118	120614	9	0	58974	10	0	10	0	-2.84641	0.719446	-2.52928	1.09206	-0.715384	0	nontarget
ASCC2	Ascc2	ENSG00000100325.10	22	30184597	30234271	113.677	0.543702	125.684	2388	49674	19	1	58817	6	4	5	1	-2.07197	0.665301	-0.660858	0.624486	0.151714	1	nontarget
ASCL4	Ascl4	ENSG00000187855.5	12	108168162	108170421	31.788	0.719697	527	527	2259	1	0	59177	0	0	0	0	-0.310374	-0.234129	0.101141	0.496612	0.50397	0	nontarget
ASF1B	Asf1b	ENSG00000105011.4	19	14230321	14247768	63.7776	0.584512	181.25	725	17447	4	0	58998	1	0	0	0	-0.0450318	0.0371251	-0.229998	0.709958	0.462765	0	nontarget
ASGR2	Asgr2	ENSG00000161944.12	17	7004641	7019019	97.397	0.575382	129.429	906	14378	7	0	58869	3	4	2	2	-1.17255	-0.957788	-0.606254	-0.156682	-0.333131	0	nontarget
ASH1L	Ash1l	ENSG00000116539.6	1	155305059	155532598	105.041	0.476713	351.448	10192	227539	29	0	59137	0	5	0	1	1.68922	0.955999	1.43023	0.193457	0.679461	0	nontarget
ASIC1	Asic1	ENSG00000110881.7	12	50451331	50477394	88.6874	0.574615	162.818	1791	26063	11	1	58992	0	2	0	0	0.760627	0.769321	1.14276	0.698814	1.00007	0	nontarget
ASPA	Aspa	ENSG00000108381.6	17	3375668	3406713	117.172	0.407958	163	978	31045	6	0	58836	8	6	0	0	0.842716	0.724108	-1.77315	-0.398943	-0.911529	0	nontarget
ASPG	Aspg	ENSG00000166183.11	14	104552016	104579098	30.7743	0.657917	138.615	1802	27082	13	0	58817	0	0	0	0	0.286656	0.407496	0.461177	0.881797	0.939511	0	nontarget
ASPHD1	Asphd1	ENSG00000174939.6	16	29911696	29931185	64.1545	0.634512	397	1191	19489	3	3	59270	18	29	0	0	0.330314	0.367298	-2.62354	-2.45611	-2.47163	1	nontarget
ASPHD2	Asphd2	ENSG00000128203.6	22	26825239	26840981	161.423	0.574914	375.667	1127	15742	3	0	59087	0	3	0	0	1.01503	0.73507	1.57201	0.641495	1.08807	0	nontarget
ASPM	Aspm	ENSG00000066279.12	1	197053258	197115824	85.221	0.367483	383.296	10349	62566	27	0	58858	4	4	4	1	-1.50968	0.702076	-0.448908	0.292232	0.063475	0	nontarget
ASPSCR1	Aspscr1	ENSG00000169696.11	17	79934683	79975282	60.0797	0.626842	147.188	2355	40599	16	0	58770	0	4	0	3	0.659818	-1.32909	0.727018	-0.172078	0.148189	0	nontarget
ASXL1	Asxl1	ENSG00000171456.12	20	30946155	31027122	81.4989	0.500298	315.8	4737	80967	15	0	59015	4	1	0	0	0.619052	0.647673	-1.0194	0.677036	-0.0278345	0	nontarget
ASXL2	Asxl2	ENSG00000143970.12	2	25956622	26101385	107.256	0.479153	362	4344	144763	12	0	59127	9	2	1	0	-0.104384	0.768907	-2.1821	0.485908	-0.726064	0	nontarget
ASXL3	Asxl3	ENSG00000141431.5	18	31158579	31331156	46.8234	0.444276	565.25	6783	172577	12	0	58823	2	2	0	1	0.0772743	-0.568453	-0.727394	-0.034036	-0.309763	0	nontarget
ATAD5	Atad5	ENSG00000176208.4	17	29158988	29222887	78.8498	0.380535	252.909	5564	63899	22	3	59015	8	19	0	0	1.64087	1.60086	-0.588624	-0.955093	-0.717081	1	nontarget
ATCAY	Atcay	ENSG00000167654.13	19	3879862	3928077	50.1684	0.568366	96	1152	48215	12	0	58909	0	1	0	1	0.324519	-0.317899	0.500343	0.523959	0.671195	0	nontarget
ATE1	Ate1	ENSG00000107669.13	10	123499939	123688316	73.6394	0.460962	135.692	1764	188377	13	0	58997	1	8	0	0	0.711167	0.833182	0.245831	-1.00208	-0.649498	0	nontarget
ATF4	Atf4	ENSG00000128272.10	22	39915700	39918691	91.6245	0.537986	534	1068	2991	2	0	58902	0	0	0	0	-0.0234719	-0.0165664	0.421154	0.724372	0.838226	0	nontarget
ATF6	Atf6	ENSG00000118217.5	1	161736084	161933860	90.3876	0.441409	132.625	2122	197776	16	0	59089	2	6	1	1	0.191144	0.382579	0.101144	-0.397554	-0.211687	0	nontarget
ATF7IP	Atf7ip	ENSG00000171681.8	12	14518610	14651697	80.5057	0.4273	285.643	3999	133087	14	0	59020	0	2	0	1	0.722221	-0.0262663	0.826777	0.368608	0.674325	0	nontarget
ATG13	Atg13	ENSG00000175224.12	11	46638826	46696368	95.821	0.494069	101.833	1833	57542	18	0	58914	1	9	1	0	0.233695	1.15973	0.645567	-0.831652	-0.382227	0	nontarget
ATG16L1	Atg16l1	ENSG00000085978.17	2	234118697	234204320	83.8667	0.489294	111.235	1891	85623	17	0	59147	0	6	0	0	0.962874	1.02595	1.00264	-0.426649	0.0389954	0	nontarget
ATG16L2	Atg16l2	ENSG00000168010.6	11	72525353	72554719	77.5399	0.581754	117.75	2355	29366	20	0	58998	0	4	0	2	1.00713	-0.405046	1.00503	0.0486136	0.425403	0	nontarget
ATG2A	Atg2a	ENSG00000110046.8	11	64662007	64684722	47.645	0.631103	154.1	6164	22715	40	0	59070	2	1	1	1	0.632025	0.885966	0.234817	1.18155	0.890432	0	nontarget
ATG2B	Atg2b	ENSG00000066739.7	14	96747595	96830207	76.9975	0.430927	154.5	6489	82612	42	0	58975	1	10	1	1	1.04904	1.26628	1.05211	-0.608833	-0.0884203	0	nontarget
ATG3	Atg3	ENSG00000144848.6	3	112251356	112280893	67.6126	0.401147	96.9167	1163	29537	12	0	59054	2	5	0	2	0.665468	-0.746552	-0.177851	-0.402507	-0.322582	0	nontarget
ATG4C	Atg4c	ENSG00000125703.10	1	63249806	63331184	68.0228	0.362791	143.7	1437	81378	10	0	58940	3	0	3	0	-1.72318	0.700485	-0.581187	1.02614	0.405919	0	nontarget
ATG4D	Atg4d	ENSG00000130734.5	19	10654571	10664094	71.6369	0.636798	257.167	1543	9523	6	0	59112	2	3	0	1	0.185643	-0.578031	-0.522908	-0.156845	-0.315327	0	nontarget
ATG7	Atg7	ENSG00000197548.8	3	11313995	11599139	111.76	0.480182	123.389	2221	285144	18	2	59158	0	3	0	1	1.76271	1.01138	2.13885	1.23269	1.70166	0	nontarget
ATL2	Atl2	ENSG00000119787.9	2	38522022	38604427	64.3876	0.424392	130.6	1959	82405	15	0	58842	0	12	0	9	0.72271	-2.87279	0.810238	-1.58438	-0.991424	0	nontarget
ATL3	Atl3	ENSG00000184743.8	11	63391559	63439393	76.4201	0.447995	136.769	1778	47834	13	0	59169	0	3	0	1	0.676196	-0.0575759	0.820675	0.105778	0.443741	0	nontarget
ATMIN	Atmin	ENSG00000166454.5	16	81069452	81080963	116.175	0.460493	718	2154	11511	3	0	58902	0	7	0	3	0.292468	-1.86706	0.764152	-0.940889	-0.457328	0	nontarget
ATOH8	Atoh8	ENSG00000168874.8	2	85978467	86015189	49.3629	0.641357	328	984	36722	3	0	58965	0	0	0	0	-0.211172	-0.108744	0.158002	0.579854	0.612014	0	nontarget
ATP10A	Atp10a	ENSG00000206190.7	15	25922420	26110317	87.3614	0.550565	228.333	4795	187897	21	0	58955	1	5	1	1	0.196653	0.389489	0.501326	-0.175278	0.0747637	0	nontarget
ATP11A	Atp11a	ENSG00000068650.14	13	113344643	113541482	95.0253	0.496421	131.552	3815	196839	29	1	59014	9	25	5	17	-1.74247	-2.87279	-1.37325	-2.05065	-1.65711	1	nontarget
ATP13A1	Atp13a1	ENSG00000105726.12	19	19756007	19774502	45.7382	0.606044	128.423	3339	18495	26	0	58631	0	0	0	0	0.955212	1.07623	0.887151	1.24133	1.37498	0	nontarget
ATP13A2	Atp13a2	ENSG00000159363.13	1	17312453	17338423	65.5575	0.626029	144.679	4051	25970	28	0	58976	6	6	5	1	-2.30195	0.543141	-1.27869	-0.273156	-0.657504	0	nontarget
ATP1A1	Atp1a1	ENSG00000163399.11	1	116915290	116952883	96.918	0.486321	140.25	3366	37593	24	0	58844	1	0	0	0	1.38553	1.37505	0.800971	1.5249	1.46873	0	nontarget
ATP1A2	Atp1a2	ENSG00000018625.10	1	160085549	160113381	100.644	0.568182	145.565	3348	27832	23	0	59010	0	1	0	0	1.36542	1.33327	1.32964	1.15951	1.46552	0	nontarget
ATP1B1	Atp1b1	ENSG00000143153.8	1	169074935	169101960	90.2159	0.469548	158	948	27025	6	0	59145	0	0	0	0	0.392603	0.398039	0.698814	0.976852	1.14742	0	nontarget
ATP1B2	Atp1b2	ENSG00000129244.4	17	7549945	7561086	101.924	0.531333	118.125	945	11141	8	0	59100	1	0	0	0	0.624448	0.59225	0.359115	1.15278	1.02797	0	nontarget
ATP2A1	Atp2a1	ENSG00000196296.9	16	28889726	28915830	106.332	0.552978	143.13	3292	26104	23	5	58597	34	30	9	5	-2.84641	-1.06626	-2.62354	-0.664992	-1.10684	1	nontarget
ATP4A	Atp4a	ENSG00000105675.4	19	36040945	36054560	85.9757	0.599559	147.273	3240	13615	22	0	58903	2	10	2	9	-0.527187	-2.87279	0.142606	-0.981252	-0.646539	0	nontarget
ATP6V0A1	Atp6v0a1	ENSG00000033627.10	17	40610862	40674629	107.992	0.480076	125.5	2761	63767	22	0	59099	3	3	3	3	-0.916112	-0.617214	0.0465285	0.611248	0.461507	0	nontarget
ATP6V0A2	Atp6v0a2	ENSG00000185344.9	12	124196865	124246302	98.0141	0.468918	139.5	2790	49437	20	0	58997	3	1	0	0	1.24102	1.22603	-0.146783	1.06729	0.651053	0	nontarget
ATP6V0B	Atp6v0b	ENSG00000117410.9	1	44440159	44443967	120.159	0.543205	107.5	860	3808	8	0	59039	1	3	1	1	-0.0520589	-0.0280182	0.61739	0.366005	0.536959	0	nontarget
ATP6V0C	Atp6v0c	ENSG00000185883.6	16	2563871	2570219	45.6342	0.631526	162	486	6348	3	0	58979	0	2	0	0	-0.208374	-0.103893	0.169509	-0.0799856	0.0563918	0	nontarget
ATP6V0D1	Atp6v0d1	ENSG00000159720.7	16	67471917	67515140	103.349	0.559253	138	1104	43223	8	0	58998	1	4	1	0	-0.258076	0.626019	0.366518	-0.0819302	0.103917	0	nontarget
ATP6V1C2	Atp6v1c2	ENSG00000143882.5	2	10861775	10925236	97.0709	0.495217	102.667	1540	63461	15	0	58684	1	11	1	4	0.0925706	-1.58057	0.561658	-1.21105	-0.710337	0	nontarget
ATP6V1D	Atp6v1d	ENSG00000100554.7	14	67761088	67826982	104.895	0.422008	88.6667	798	65894	9	0	58879	5	11	4	1	-2.11024	0.079071	-0.993261	-1.25276	-1.13553	0	nontarget
ATP6V1E1	Atp6v1e1	ENSG00000131100.8	22	18074902	18111584	99.0173	0.46494	81.6667	735	36682	9	0	58935	1	2	0	0	0.739865	0.727396	0.427554	0.489984	0.572255	0	nontarget
ATP7B	Atp7b	ENSG00000123191.9	13	52506809	52585630	89.9039	0.538807	215.429	4524	78821	21	0	58804	9	6	2	0	-0.622988	1.09438	-2.09996	-0.354683	-1.03021	0	nontarget
ATP8A2	Atp8a2	ENSG00000132932.12	13	25946209	26599989	78.3844	0.459295	103.649	3835	653780	37	1	58981	2	5	2	0	0.701818	2.58755	0.966469	0.515693	0.741175	1	nontarget
ATP8B2	Atp8b2	ENSG00000143515.12	1	154298029	154323783	103.66	0.526243	141.786	3970	25754	28	0	59056	1	12	1	0	0.702625	1.57985	0.969917	-0.979348	-0.403013	0	nontarget
ATP8B3	Atp8b3	ENSG00000130270.12	19	1782074	1812275	43.2688	0.576881	142.538	3706	30201	26	0	58976	12	6	12	2	-2.84641	-0.44306	-2.62354	-0.481002	-1.5117	0	nontarget
ATP8B4	Atp8b4	ENSG00000104043.10	15	50150435	50475014	76.9368	0.416031	155.964	4367	324579	28	0	59018	0	3	0	0	1.61618	1.74375	1.32348	0.486142	0.909778	0	nontarget
ATP9A	Atp9a	ENSG00000054793.9	20	50213053	50385173	91.6821	0.538598	119.926	3238	172120	27	0	58967	3	5	3	0	-0.843816	1.62905	-0.0486265	0.0794162	0.0643972	0	nontarget
ATP9B	Atp9b	ENSG00000166377.15	18	76829285	77138283	88.8861	0.48762	123.133	3694	308998	30	1	59055	6	23	3	17	-0.495615	-2.87279	-0.621931	-1.91563	-1.41227	1	nontarget
ATPAF1	Atpaf1	ENSG00000123472.8	1	47098409	47139539	72.7113	0.439464	112.333	1011	41130	9	0	58981	0	1	0	0	0.45445	0.512668	0.677409	0.593072	0.815562	0	nontarget
ATPAF2	Atpaf2	ENSG00000171953.11	17	17880723	17942523	100.337	0.554881	124.9	1249	61800	10	2	59058	3	0	1	0	0.128069	1.03014	0.271553	1.88689	1.27839	0	nontarget
ATRAID	Atraid	ENSG00000138085.12	2	27434895	27440046	104.94	0.524422	128.143	897	5151	7	0	59021	0	4	0	0	0.593791	0.547166	0.893666	-0.0920807	0.29301	0	nontarget
ATRN	Atrn	ENSG00000088812.13	20	3451687	3631769	103.571	0.470341	144.571	4048	180082	28	0	59062	1	7	1	2	0.830693	0.309588	1.01367	-0.196333	0.240476	0	nontarget
ATRNL1	Atrnl1	ENSG00000107518.12	10	116853124	117708503	74.9652	0.410288	151.241	4386	855379	29	0	59051	3	5	3	3	-0.256438	0.149576	0.107417	0.0441283	0.111086	0	nontarget
ATXN10	Atxn10	ENSG00000130638.11	22	46067678	46241187	82.2233	0.439312	132.75	1593	173509	12	0	58916	0	0	0	0	0.786552	0.869041	0.874819	1.10535	1.30981	0	nontarget
ATXN2	Atxn2	ENSG00000204842.10	12	111890018	112037480	84.8964	0.463874	151.208	3629	147462	24	0	59047	0	0	0	0	1.32268	1.3928	1.20996	1.41322	1.65683	0	nontarget
ATXN7L2	Atxn7l2	ENSG00000162650.11	1	110026101	110035426	89.9811	0.572075	210.2	2102	9325	10	0	58779	0	1	0	0	0.528917	0.512786	0.760167	0.682036	0.900763	0	nontarget
ATXN7L3	Atxn7l3	ENSG00000087152.11	17	42269173	42277481	112.194	0.50011	95.9167	1151	8308	12	3	58969	0	0	0	0	1.4468	1.35736	2.38072	2.54479	2.80868	0	nontarget
AUNIP	Aunip	ENSG00000127423.6	1	26158414	26185903	88.8207	0.50251	255.6	1278	27489	5	0	58945	0	0	0	0	0.228966	0.241779	0.574351	0.879231	1.02229	0	nontarget
AUP1	Aup1	ENSG00000115307.12	2	74753772	74757066	98.9301	0.547449	156	1560	3294	10	0	58964	0	2	0	0	0.663794	0.628053	0.898557	0.463713	0.760641	0	nontarget
AURKA	Aurka	ENSG00000087586.13	20	54944445	54967393	98.166	0.420984	159.25	1274	22948	8	0	59101	0	1	0	1	0.683461	-0.147605	0.942797	0.766088	1.05103	0	nontarget
AURKAIP1	Aurkaip1	ENSG00000175756.9	1	1309110	1310875	55.1499	0.635688	206	618	1765	3	0	58962	2	6	0	0	-0.12532	-0.0508898	-0.758246	-1.02306	-1.03022	0	nontarget
AURKB	Aurkb	ENSG00000178999.8	17	8108056	8113918	57.0497	0.570674	141	1128	5862	8	0	59026	4	2	4	0	-2.84641	0.205662	-1.3747	0.100476	-0.542689	0	nontarget
AURKC	Aurkc	ENSG00000105146.8	19	57742377	57746916	70.1783	0.552117	166.833	1001	4539	6	0	59013	0	2	0	0	0.110531	0.171402	0.429314	0.108	0.314103	0	nontarget
AVEN	Aven	ENSG00000169857.3	15	34158428	34331377	73.516	0.457197	170.4	852	172949	5	1	59063	1	13	0	0	0.385991	0.512167	0.294234	-1.68643	-1.20137	1	nontarget
AVPI1	Avpi1	ENSG00000119986.6	10	99437181	99447080	48.8245	0.619566	228	456	9899	2	0	58568	0	1	0	0	-0.283769	-0.175403	0.12345	0.192657	0.276022	0	nontarget
AXDND1	Axdnd1	ENSG00000162779.16	1	179334855	179523870	77.2012	0.402025	129.538	3368	189015	26	0	58982	4	10	3	0	-0.877412	1.59963	-0.450326	-0.910014	-0.724708	0	nontarget
AXIN1	Axin1	ENSG00000103126.10	16	337440	402673	84.8747	0.631477	270.5	2705	65233	10	0	58684	0	8	0	0	0.542931	0.53823	0.721146	-1.04125	-0.575487	0	nontarget
AXL	Axl	ENSG00000167601.7	19	41725108	41767671	87.1662	0.594264	140.55	2811	42563	20	0	58980	0	3	0	2	1.10942	-0.338585	1.0996	0.369076	0.726528	0	nontarget
B3GALNT2	B3galnt2	ENSG00000162885.8	1	235613238	235667781	98.0064	0.461647	133.909	1473	54543	11	0	59157	4	13	1	0	-0.102865	0.793157	-0.774144	-1.57673	-1.3156	0	nontarget
B3GALT1	B3galt1	ENSG00000172318.4	2	168675182	168730551	79.9348	0.44332	987	987	55369	1	0	59138	0	0	0	0	-0.211764	-0.13256	0.245558	0.494648	0.598389	0	nontarget
B3GALT2	B3galt2	ENSG00000162630.5	1	193148175	193155784	96.4676	0.403605	1275	1275	7609	1	0	58875	0	0	0	0	-0.0258023	-0.0419874	0.455449	0.593798	0.753448	0	nontarget
B3GAT1	B3gat1	ENSG00000109956.8	11	134248398	134281812	53.2532	0.629083	265.5	1062	33414	4	0	59028	2	12	0	0	-0.120631	-0.025977	-0.772676	-2.01628	-1.77594	0	nontarget
B3GAT3	B3gat3	ENSG00000149541.5	11	62382768	62389647	55.3489	0.625037	207.6	1038	6879	5	0	58607	0	1	0	0	-0.0369939	0.039267	0.291587	0.32744	0.444015	0	nontarget
B3GNT2	B3gnt2	ENSG00000170340.10	2	62423248	62451866	144.81	0.462115	1200	1200	28618	1	0	58651	1	4	0	0	0.496617	0.333432	0.543747	-0.141117	0.101118	0	nontarget
B3GNT4	B3gnt4	ENSG00000176383.8	12	122688090	122693499	49.734	0.537547	532	2128	5409	4	0	58679	3	2	0	0	-0.411189	-0.302286	-1.37406	-0.234405	-0.757564	0	nontarget
B3GNT8	B3gnt8	ENSG00000177191.2	19	41931264	41934635	59.2957	0.654455	1200	1200	3371	1	0	59079	1	1	0	0	-0.440033	-0.352422	-0.52403	-0.0344118	-0.230285	0	nontarget
B3GNTL1	B3gntl1	ENSG00000175711.4	17	80900031	81009686	59.7696	0.582557	97.1667	1166	109655	12	1	59092	4	30	1	10	-0.293414	-2.87279	-0.838311	-2.53125	-2.47163	1	nontarget
B4GALNT1	B4galnt1	ENSG00000135454.9	12	58017193	58027138	94.2733	0.593597	157	2669	9945	17	0	58856	0	5	0	0	1.00818	0.974936	1.08032	-0.143773	0.290886	0	nontarget
B4GALNT2	B4galnt2	ENSG00000167080.4	17	47209822	47247351	107.379	0.554517	160.636	1767	37529	11	0	58951	12	1	11	1	-2.84641	0.00341654	-2.62354	0.894024	-0.877339	0	nontarget
B4GALNT3	B4galnt3	ENSG00000139044.6	12	569530	672675	66.9101	0.573713	155.95	3119	103145	20	0	59171	5	44	3	2	-1.50851	-0.475789	-1.2357	-2.53125	-2.47163	0	nontarget
B4GALNT4	B4galnt4	ENSG00000182272.7	11	369796	382116	53.8979	0.621643	122.111	2198	12320	18	0	58865	10	27	9	14	-2.84641	-2.87279	-2.62354	-2.53125	-2.47163	0	nontarget
B4GALT2	B4galt2	ENSG00000117411.12	1	44444615	44456840	101.471	0.597388	201	1206	12225	6	0	59003	0	1	0	0	0.495916	0.444905	0.798139	0.69544	0.922759	0	nontarget
B4GALT3	B4galt3	ENSG00000158850.10	1	161141100	161147287	89.8286	0.571706	208.286	1458	6187	7	0	59074	0	1	0	0	0.371935	0.362179	0.664435	0.600846	0.804382	0	nontarget
B4GALT4	B4galt4	ENSG00000121578.8	3	118930579	118959950	78.29	0.467043	179	1074	29371	6	0	59141	1	0	0	0	0.24591	0.287672	0.0220847	0.869738	0.695187	0	nontarget
B4GALT6	B4galt6	ENSG00000118276.7	18	29202210	29265799	81.9033	0.420074	133.667	1203	63589	9	0	58827	0	0	0	0	0.59456	0.622178	0.799722	1.0402	1.23726	0	nontarget
B9D1	B9d1	ENSG00000108641.10	17	19240867	19281495	67.6512	0.568997	185.429	1298	40628	7	1	58896	1	2	0	0	0.296054	0.381744	0.231924	0.406738	0.395035	0	nontarget
B9D2	B9d2	ENSG00000123810.3	19	41860326	41870078	63.6783	0.626769	182	546	9752	3	0	58660	0	4	0	0	-0.0378836	0.023894	0.312165	-0.534179	-0.27441	0	nontarget
BACE1	Bace1	ENSG00000186318.12	11	117156402	117186975	97.4396	0.567165	173.333	1560	30573	9	0	58813	1	1	0	0	0.604121	0.58351	0.304008	0.738187	0.698584	0	nontarget
BACH1	Bach1	ENSG00000156273.11	21	30566392	31003071	82.83	0.442163	402	2412	436679	6	0	58757	1	4	0	0	0.475685	0.598136	0.0504805	-0.442446	-0.275745	0	nontarget
BAG3	Bag3	ENSG00000151929.5	10	121410882	121437331	87.0543	0.632903	438	1752	26449	4	0	58933	1	1	0	0	0.166218	0.150179	-0.0289321	0.437187	0.337272	0	nontarget
BAG5	Bag5	ENSG00000166170.9	14	104022881	104029168	97.7718	0.476802	739.5	1479	6287	2	0	58760	0	1	0	0	0.00767245	-0.00912386	0.47672	0.342999	0.540185	0	nontarget
BAIAP2	Baiap2	ENSG00000175866.11	17	79008948	79091232	72.5019	0.605636	130.438	2087	82284	16	0	59056	0	4	0	1	0.79964	0.0925609	0.838138	-0.092586	0.255687	0	nontarget
BAIAP3	Baiap3	ENSG00000007516.9	16	1383602	1399439	60.9284	0.623617	114.861	4135	15837	36	0	58787	6	18	5	3	-2.00427	-0.394929	-1.10096	-1.78376	-1.52214	0	nontarget
BAMBI	Bambi	ENSG00000095739.7	10	28966271	28971868	90.4627	0.514538	359.5	719	5597	2	0	58893	0	1	0	0	0.0349396	0.0462029	0.463301	0.399258	0.580252	0	nontarget
BANP	Banp	ENSG00000172530.15	16	87982850	88110924	58.8379	0.606797	136	1496	128074	11	1	59106	0	5	0	0	0.556004	0.695876	0.877472	-0.261796	0.0937353	1	nontarget
BARD1	Bard1	ENSG00000138376.6	2	215590370	215674428	84.6799	0.450503	218.182	2400	84058	11	0	59028	5	1	5	1	-2.84641	-0.150279	-1.30674	0.66902	-0.18944	0	nontarget
BARHL2	Barhl2	ENSG00000143032.7	1	91177096	91182794	85.3979	0.609787	394	1182	5698	3	0	58713	0	0	0	0	0.0692245	0.0688598	0.4484	0.774813	0.881656	0	nontarget
BATF	Batf	ENSG00000156127.6	14	75988768	76013358	48.7981	0.597005	132	396	24590	3	0	58823	0	0	0	0	-0.21322	-0.0884115	0.164889	0.618604	0.651565	0	nontarget
BATF3	Batf3	ENSG00000123685.4	1	212859760	212873327	115.562	0.568878	153	306	13567	2	0	59232	0	0	0	0	0.443086	0.363587	0.852544	1.10198	1.28572	0	nontarget
BAX	Bax	ENSG00000087088.15	19	49458072	49465055	70.5976	0.600307	151.6	758	6983	5	1	59067	0	3	0	0	0.259197	0.315021	0.766048	0.12228	0.394159	0	nontarget
BAZ1A	Baz1a	ENSG00000198604.6	14	35221937	35344853	79.2347	0.407093	190.261	4376	122916	23	0	58913	0	4	0	0	1.26693	1.30446	1.17953	0.122735	0.566743	0	nontarget
BBS10	Bbs10	ENSG00000179941.6	12	76738254	76742222	56.3389	0.48934	1092	2184	3968	2	0	59111	0	1	0	0	-0.587112	-0.474263	-0.0740983	-0.0869278	-0.00560721	0	nontarget
BBS2	Bbs2	ENSG00000125124.7	16	56500748	56554195	105.708	0.459448	141.526	2689	53447	19	0	59077	4	1	0	0	1.29966	1.25548	-0.427104	1.11942	0.52797	0	nontarget
BBS5	Bbs5	ENSG00000163093.7	2	170335688	170382432	88.878	0.392569	108.176	1839	46744	17	0	58954	12	5	0	0	1.19083	1.17364	-2.56654	-0.100697	-1.10466	0	nontarget
BBX	Bbx	ENSG00000114439.14	3	107241783	107530171	87.3689	0.450007	199.2	2988	288388	15	0	58932	1	4	0	4	0.988048	-1.51498	0.437697	-0.0663328	0.151688	0	nontarget
BCAN	Bcan	ENSG00000132692.14	1	156611182	156629324	73.1503	0.618825	222.154	2888	18142	13	0	59020	0	11	0	0	0.546647	0.561892	0.695345	-1.49277	-0.96925	0	nontarget
BCAR1	Bcar1	ENSG00000050820.12	16	75262928	75301951	40.5459	0.644193	346.75	2774	39023	8	0	58765	0	5	0	3	-0.0701725	-2.03876	0.224843	-0.817118	-0.556101	0	nontarget
BCAR3	Bcar3	ENSG00000137936.12	1	94027347	94312706	78.3096	0.527828	242.818	2671	285359	11	0	59067	0	0	0	0	0.573458	0.703538	0.651059	0.944433	1.09402	0	nontarget
BCAS1	Bcas1	ENSG00000064787.8	20	52553316	52687304	115.134	0.491648	160.846	2091	133988	13	0	58977	1	0	1	0	0.194822	1.06927	0.70164	1.39819	1.34037	0	nontarget
BCAS3	Bcas3	ENSG00000141376.16	17	58754814	59470199	102.441	0.484928	119	3094	715385	26	1	59063	3	6	3	3	-0.152454	0.257037	0.550955	0.256312	0.421628	1	nontarget
BCAT2	Bcat2	ENSG00000105552.10	19	49298319	49314286	59.0864	0.610995	125.75	1509	15967	12	1	59065	3	9	2	0	-1.13146	0.647969	-0.480779	-0.962024	-0.858186	1	nontarget
BCCIP	Bccip	ENSG00000107949.12	10	127512115	127542264	85.5051	0.407894	141.667	1275	30149	9	0	59109	1	3	0	0	0.640678	0.630684	0.327352	0.0966902	0.245037	0	nontarget
BCDIN3D	Bcdin3d	ENSG00000186666.4	12	50231573	50236912	99.8646	0.55304	447	894	5339	2	1	58679	2	1	2	0	-1.44971	0.238691	-0.118232	0.751713	0.453243	0	nontarget
BCKDK	Bckdk	ENSG00000103507.9	16	31117428	31124110	78.5276	0.577304	135.818	1494	6682	11	0	58933	0	1	0	0	0.52053	0.549838	0.712996	0.663623	0.866632	0	nontarget
BCL11A	Bcl11a	ENSG00000119866.16	2	60678302	60780702	73.3488	0.556851	531.6	2658	102400	5	0	59208	1	25	1	25	-0.964208	-2.87279	-0.252902	-2.53125	-2.47163	0	nontarget
BCL11B	Bcl11b	ENSG00000127152.13	14	99635624	99737861	37.7796	0.656312	677.25	2709	102237	4	0	59011	0	0	0	0	-0.372482	-0.237768	8.09382e-05	0.42337	0.421702	0	nontarget
BCL2L1	Bcl2l1	ENSG00000171552.8	20	30252255	30311792	106.526	0.568168	357	714	59537	2	0	59189	0	5	0	0	0.27103	0.250631	0.66723	-0.537237	-0.157622	0	nontarget
BCL2L11	Bcl2l11	ENSG00000153094.17	2	111876955	111926024	34.8877	0.469535	115.5	924	49069	8	2	58886	0	2	0	0	0.247597	0.417386	1.00822	0.695476	0.888932	0	nontarget
BCL2L12	Bcl2l12	ENSG00000126453.5	19	50168823	50177173	61.4566	0.61386	153	1071	8350	7	1	59076	0	1	0	0	0.293736	0.366218	0.760383	0.73821	0.90769	0	nontarget
BCL2L13	Bcl2l13	ENSG00000099968.13	22	18111621	18213388	82.6848	0.482646	219.857	1539	101767	7	0	58764	3	2	1	0	-0.569932	0.405103	-0.80769	0.197861	-0.19881	0	nontarget
BCL2L2	Bcl2l2	ENSG00000129473.5	14	23767999	23780968	77.2919	0.629173	297	594	12969	2	0	58719	0	0	0	0	0.0146422	0.041024	0.384841	0.737683	0.827748	0	nontarget
BCL7C	Bcl7c	ENSG00000099385.7	16	30844947	30906281	90.6645	0.641362	115	690	61334	6	0	59030	3	0	3	0	-1.85051	0.534815	-0.64415	1.04704	0.37094	0	nontarget
BCL9	Bcl9	ENSG00000116128.5	1	147013182	147098017	90.6875	0.52179	617.571	4323	84835	7	2	59155	26	24	0	0	0.452227	0.454713	-2.62354	-2.39964	-2.47163	1	nontarget
BCL9L	Bcl9l	ENSG00000186174.8	11	118764584	118796317	68.3287	0.642708	624.667	5622	31733	9	0	59070	2	5	2	3	-1.5991	-1.95838	-0.639465	-0.738606	-0.775982	0	nontarget
BCO2	Bco2	ENSG00000197580.7	11	112046190	112095422	100.844	0.445337	155.833	1870	49232	12	1	59059	15	2	0	0	1.03582	1.00499	-2.62354	0.856263	-0.925607	1	nontarget
BCS1L	Bcs1l	ENSG00000074582.8	2	219523487	219528166	110.669	0.551348	186	1302	4679	7	0	58945	0	0	0	0	0.625013	0.548496	0.938911	1.17814	1.37773	0	nontarget
BDNF	Bdnf	ENSG00000176697.14	11	27676440	27743605	86.5246	0.536672	221.4	1107	67165	5	0	59085	0	2	0	0	0.237143	0.281132	0.549151	0.172102	0.411089	0	nontarget
BEGAIN	Begain	ENSG00000183092.11	14	101003486	101053750	49.4708	0.61245	359.6	1798	50264	5	0	58993	0	3	0	2	-0.18677	-1.53528	0.162662	-0.395038	-0.20871	0	nontarget
BEND5	Bend5	ENSG00000162373.8	1	49193195	49242641	78.3157	0.460237	213	1065	49446	5	0	59031	0	1	0	0	0.19208	0.242018	0.516447	0.452426	0.648314	0	nontarget
BEST1	Best1	ENSG00000167995.11	11	61717293	61732987	108.111	0.510474	201	2211	15694	11	0	58951	8	21	0	4	0.795394	-1.86461	-1.89636	-2.38312	-2.13158	0	nontarget
BEST3	Best3	ENSG00000127325.14	12	70037140	70093256	64.9941	0.439249	212.2	2122	56116	10	0	58984	1	1	1	0	-0.5651	0.415275	0.0369854	0.508856	0.435792	0	nontarget
BFSP1	Bfsp1	ENSG00000125864.7	20	17474550	17549865	82.085	0.526662	237.571	1663	75315	7	0	59051	0	3	0	0	0.283277	0.337509	0.55632	-0.103869	0.179849	0	nontarget
BICD1	Bicd1	ENSG00000151746.9	12	32259769	32536567	71.7744	0.501663	285	3135	276798	11	0	58951	0	2	0	1	0.468816	-0.175055	0.566935	0.176001	0.420416	0	nontarget
BID	Bid	ENSG00000015475.14	22	18216906	18257536	57.8999	0.608909	122.857	860	40630	7	0	58970	2	2	0	0	0.146878	0.247097	-0.593441	0.104369	-0.16665	0	nontarget
BIN1	Bin1	ENSG00000136717.10	2	127805603	127864931	63.1536	0.598915	97.35	1947	59328	20	0	59084	0	2	0	1	0.916919	0.241475	0.89422	0.512598	0.776765	0	nontarget
BIN2	Bin2	ENSG00000110934.6	12	51674822	51718452	116.006	0.48906	141.462	1839	43630	13	1	59026	4	1	1	0	0.316296	1.15391	-0.169999	1.34914	0.769766	1	nontarget
BIRC2	Birc2	ENSG00000110330.4	11	102217942	102249401	96.3971	0.384382	239.75	1918	31459	8	0	58770	0	11	0	4	0.706709	-1.96424	0.960489	-1.40614	-0.773915	0	nontarget
BIRC3	Birc3	ENSG00000023445.9	11	102188215	102210134	96.1238	0.398651	232.875	1863	21919	8	0	58815	0	5	0	0	0.660128	0.593344	0.925216	-0.368266	0.0907306	0	nontarget
BIRC5	Birc5	ENSG00000089685.10	17	76210267	76221717	40.5145	0.529603	253	1012	11450	4	0	58761	0	0	0	0	-0.359979	-0.214951	0.0688585	0.533642	0.552379	0	nontarget
BLMH	Blmh	ENSG00000108578.10	17	28575218	28619074	84.4071	0.462557	126.083	1513	43856	12	1	58692	1	3	0	0	0.840393	0.875124	0.660158	0.428755	0.585415	0	nontarget
BLOC1S2	Bloc1s2	ENSG00000196072.7	10	102033713	102046469	77.1935	0.498071	106.4	532	12756	5	0	58947	2	0	0	0	0.183088	0.234394	-0.486957	0.856635	0.390113	0	nontarget
BLVRB	Blvrb	ENSG00000090013.5	19	40953696	40971747	35.3032	0.617694	155.6	778	18051	5	0	58968	0	1	0	1	-0.215993	-0.860897	0.148553	0.24535	0.318256	0	nontarget
BLZF1	Blzf1	ENSG00000117475.9	1	169337208	169365778	83.3434	0.381426	215.667	1294	28570	6	0	59165	1	1	1	0	-0.431478	0.44986	0.228345	0.594308	0.584766	0	nontarget
BMF	Bmf	ENSG00000104081.9	15	40380091	40401093	93.0045	0.57773	191	573	21002	3	0	58820	0	1	0	1	0.219224	-0.5668	0.580416	0.522561	0.7133	0	nontarget
BMP4	Bmp4	ENSG00000125378.11	14	54416454	54425479	101.369	0.582962	648.5	1297	9025	2	0	58751	0	0	0	0	0.0822716	0.0510572	0.524238	0.788791	0.91792	0	nontarget
BMP7	Bmp7	ENSG00000101144.8	20	55743804	55841685	68.7169	0.612965	204.286	1430	97881	7	0	58896	0	1	0	1	0.243423	-0.454371	0.469776	0.454452	0.612032	0	nontarget
BMPR2	Bmpr2	ENSG00000204217.8	2	203241659	203432474	82.8458	0.457429	245.769	3195	190815	13	0	59093	0	2	0	1	0.714315	0.00319006	0.805782	0.357465	0.654177	0	nontarget
BMS1	Bms1	ENSG00000165733.7	10	43278249	43330385	90.1907	0.456711	180.955	3981	52136	22	1	58922	21	41	20	34	-2.84641	-2.87279	-2.62354	-2.53125	-2.47163	1	nontarget
BNIP2	Bnip2	ENSG00000140299.7	15	59951345	59981733	54.0707	0.389746	114.333	1029	30388	9	0	59026	1	4	0	1	0.371351	-0.338672	0.0700143	-0.343833	-0.192988	0	nontarget
BOC	Boc	ENSG00000144857.10	3	112929850	113006303	87.7868	0.592196	216.778	3902	76453	18	0	59088	1	0	0	0	0.950497	0.95925	0.446181	1.25311	1.12547	0	nontarget
BOK	Bok	ENSG00000176720.3	2	242498136	242513546	37.5467	0.645816	145.667	437	15410	3	0	58814	0	7	0	0	-0.242744	-0.123017	0.137224	-1.27618	-0.9726	0	nontarget
BOLA1	Bola1	ENSG00000178096.8	1	149859440	149872351	79.4822	0.644979	409.5	819	12911	2	0	59132	0	2	0	0	0.0302104	0.040571	0.400521	0.0323903	0.234053	0	nontarget
BOLA3	Bola3	ENSG00000163170.7	2	74362525	74375121	96.6079	0.443932	119.667	359	12596	3	0	59190	0	3	0	0	0.351461	0.324855	0.72124	-0.0049174	0.329503	0	nontarget
BOLL	Boll	ENSG00000152430.13	2	198591603	198651486	61.7827	0.441476	94.6364	1041	59883	11	0	59013	0	2	0	0	0.471012	0.574079	0.648918	0.261672	0.520042	0	nontarget
BPIFC	Bpifc	ENSG00000184459.4	22	32809834	32860471	81.7277	0.451396	107.8	1617	50637	15	1	58923	21	1	18	0	-2.84641	1.05729	-2.62354	1.12328	-1.4148	1	nontarget
BPNT1	Bpnt1	ENSG00000162813.13	1	220230824	220263804	111.09	0.447878	122	976	32980	8	0	59159	8	6	8	2	-2.84641	-0.706441	-1.83306	-0.410789	-0.948235	0	nontarget
BPTF	Bptf	ENSG00000171634.12	17	65821640	65980494	79.9278	0.442915	297.448	8626	158854	29	2	59048	0	2	0	0	1.6968	1.77433	1.9268	1.4501	1.81235	0	nontarget
BRAP	Brap	ENSG00000089234.11	12	112079950	112123790	84.5605	0.462732	154.25	1851	43840	12	0	59058	1	0	1	0	-0.237286	0.69468	0.309856	1.10451	0.97932	0	nontarget
BRCA1	Brca1	ENSG00000012048.15	17	41196312	41277500	86.9461	0.427288	317.13	7294	81188	23	0	58972	8	3	8	2	-2.84641	-0.292436	-1.80472	0.372233	-0.541889	0	nontarget
BRCA2	Brca2	ENSG00000139618.10	13	32889611	32973805	79.2707	0.381058	400.5	10413	84194	26	0	58858	4	1	0	0	1.3502	1.3717	-0.587781	1.06105	0.429504	0	nontarget
BRF1	Brf1	ENSG00000185024.11	14	105675623	105781926	80.1918	0.578346	135.684	2578	106303	19	1	58770	12	14	11	11	-2.84641	-2.87279	-2.47813	-1.36057	-1.65517	1	nontarget
BRI3BP	Bri3bp	ENSG00000184992.10	12	125478246	125515777	154.736	0.574527	277.5	555	37531	2	0	58859	2	2	0	0	0.928978	0.698939	0.452723	0.838929	0.766127	0	nontarget
BRINP2	Brinp2	ENSG00000198797.6	1	177140633	177251558	79.6212	0.555284	363.571	2545	110925	7	0	58671	1	1	1	1	-0.716454	-0.524701	-0.0700047	0.425026	0.321234	0	nontarget
BRIP1	Brip1	ENSG00000136492.4	17	59758627	59940882	101.214	0.388838	207.474	3942	182255	19	1	59128	2	7	2	3	-0.141651	-0.525192	0.704223	-0.114636	0.213088	1	nontarget
BRMS1	Brms1	ENSG00000174744.9	11	66104804	66112596	74.283	0.590701	137.111	1234	7792	9	0	58631	0	1	0	1	0.379322	-0.368677	0.608163	0.578583	0.761602	0	nontarget
BRMS1L	Brms1l	ENSG00000100916.9	14	36295524	36401531	67.3175	0.400278	103.2	1032	106007	10	0	59052	0	0	0	0	0.592149	0.675555	0.74525	0.996625	1.18226	0	nontarget
BROX	Brox	ENSG00000162819.7	1	222885895	222908538	72.2585	0.387959	109	1308	22643	12	1	59261	4	3	0	3	0.880037	-1.14631	-0.538987	0.421966	0.063949	1	nontarget
BRSK1	Brsk1	ENSG00000160469.12	19	55793440	55823901	93.1082	0.5945	128.389	2311	30461	18	0	58963	1	3	0	2	1.09122	-0.379815	0.587891	0.37906	0.528401	0	nontarget
BSCL2	Bscl2	ENSG00000168000.10	11	62457747	62477317	69.0405	0.554739	155.167	1862	19570	12	0	58922	1	15	0	0	0.438766	0.503752	0.0893035	-2.05567	-1.55668	0	nontarget
BSDC1	Bsdc1	ENSG00000160058.14	1	32830704	32860332	63.6084	0.577422	148.5	1485	29628	10	0	58997	0	1	0	1	0.303311	-0.396071	0.519163	0.519373	0.681498	0	nontarget
BSG	Bsg	ENSG00000172270.14	19	571297	583493	39.2315	0.638037	220	1760	12196	8	0	59044	0	12	0	5	-0.0221007	-2.87279	0.272105	-1.94636	-1.49852	0	nontarget
BST2	Bst2	ENSG00000130303.8	19	17513748	17516457	76.4141	0.555868	141.75	567	2709	4	0	58904	7	6	6	0	-2.84641	0.13022	-2.23916	-0.876108	-1.45274	0	nontarget
BTBD1	Btbd1	ENSG00000064726.5	15	83685174	83736106	97.9456	0.440637	187.125	1497	50932	8	2	58962	2	1	2	0	-0.773937	0.894618	0.627096	1.42434	1.2075	0	nontarget
BTBD11	Btbd11	ENSG00000151136.10	12	107712190	108053419	77.435	0.534148	205.562	3289	341229	16	0	59127	0	0	0	0	0.884347	1.02832	0.823349	1.09168	1.26635	0	nontarget
BTBD16	Btbd16	ENSG00000138152.7	10	124030821	124097677	90.095	0.482754	107.533	1613	66856	15	0	59104	5	1	4	0	-2.07248	0.965194	-1.07335	0.880771	0.0510583	0	nontarget
BTBD2	Btbd2	ENSG00000133243.4	19	1985447	2034880	61.7052	0.610149	152.375	1219	49433	8	0	58946	0	3	0	1	0.227104	-0.46803	0.458819	-0.144304	0.0985035	0	nontarget
BTBD6	Btbd6	ENSG00000184887.9	14	105714827	105717430	43.7404	0.592591	420	1260	2603	3	0	58396	1	2	0	0	-0.420435	-0.299122	-0.515478	-0.226869	-0.353965	0	nontarget
BTG2	Btg2	ENSG00000159388.5	1	203274619	203278730	42.0407	0.649898	244.5	489	4111	2	0	59014	0	1	0	0	-0.294476	-0.191594	0.111178	0.185448	0.258961	0	nontarget
BTG3	Btg3	ENSG00000154640.10	21	18965971	18985265	68.6339	0.426093	195.75	783	19294	4	0	59196	1	15	0	1	0.0888997	-0.64066	-0.0875446	-2.26021	-1.75998	0	nontarget
BTRC	Btrc	ENSG00000166167.13	10	103113820	103317078	94.8557	0.459047	135.857	1902	203258	14	0	59128	5	51	5	29	-2.54051	-2.87279	-1.03272	-2.53125	-2.47163	0	nontarget
BUB1	Bub1	ENSG00000169679.10	2	111395275	111435691	89.5689	0.425268	136.4	3410	40416	25	5	59055	15	15	12	4	-2.84641	-0.502484	-0.865102	0.58111	0.209009	1	nontarget
BUD13	Bud13	ENSG00000137656.7	11	116618886	116643704	104.903	0.508716	195.7	1957	24818	10	0	59203	4	5	1	2	-0.191718	-0.791253	-0.801877	-0.271914	-0.470017	0	nontarget
C11orf1	1110032A03Rik	ENSG00000137720.3	11	111749659	111756699	94.008	0.488912	130.4	652	7040	5	0	58796	2	2	0	0	0.366077	0.356914	-0.298117	0.286738	0.10351	0	nontarget
C11orf24	1810055G02Rik	ENSG00000171067.6	11	68028803	68039469	58.4543	0.523386	681	1362	10666	2	0	58737	0	0	0	0	-0.443837	-0.331806	0.0331171	0.425696	0.459151	0	nontarget
C11orf49	1110051M20Rik	ENSG00000149179.9	11	46958240	47185936	99.1605	0.537779	133.1	1331	227696	10	0	59099	0	9	0	6	0.822617	-2.61601	0.927889	-1.05434	-0.513746	0	nontarget
C11orf52	2310030G06Rik	ENSG00000149300.5	11	111788756	111797596	70.0304	0.535497	99	396	8840	4	0	58707	2	0	0	0	0.0343014	0.107586	-0.616201	0.773863	0.27289	0	nontarget
C11orf54	4931406C07Rik	ENSG00000182919.10	11	93474757	93497915	94.8639	0.404469	124.75	998	23158	8	0	59123	8	8	0	0	0.714453	0.671246	-1.96593	-0.90357	-1.27563	0	nontarget
C11orf65	4930550C14Rik	ENSG00000166323.8	11	108179246	108338258	88.1722	0.384218	119.4	1194	159012	10	0	59103	5	50	1	35	-0.0148909	-2.87279	-1.08939	-2.53125	-2.47163	0	nontarget
C11orf74	B230118H07Rik	ENSG00000166352.11	11	36616051	36694823	71.4162	0.388545	139.2	696	78772	5	0	59035	0	3	0	0	0.343584	0.393173	0.616374	-0.112461	0.211844	0	nontarget
C11orf80	Gm960	ENSG00000173715.11	11	66511922	66610987	41.5341	0.500935	122.562	1961	99065	16	0	58922	1	0	1	0	-0.468947	0.62669	0.0183751	0.938217	0.720656	0	nontarget
C11orf88	4833427G06Rik	ENSG00000183644.9	11	111385510	111407756	80.4603	0.429683	91.3333	548	22246	6	0	59033	1	0	0	0	0.394466	0.418212	0.145745	0.956672	0.81263	0	nontarget
C12orf10	Myg1	ENSG00000139637.9	12	53693470	53700961	98.291	0.590235	169	1183	7491	7	0	59068	0	3	0	0	0.521485	0.482583	0.800481	0.0972621	0.417567	0	nontarget
C12orf29	4930430F08Rik	ENSG00000133641.13	12	88427623	88443937	64.015	0.381069	156.75	1254	16314	8	0	58885	0	0	0	0	0.405424	0.431446	0.657552	0.915144	1.0913	0	nontarget
C12orf4	D6Wsu163e	ENSG00000047621.7	12	4596894	4647674	80.0266	0.394496	133.615	1737	50780	13	0	59092	3	8	2	0	-0.84531	0.856373	-0.43265	-0.883223	-0.732973	0	nontarget
C12orf43	2210016L21Rik	ENSG00000157895.7	12	121440225	121454305	82.5295	0.563805	155.833	935	14080	6	0	59309	0	4	0	1	0.268685	-0.482986	0.569248	-0.326191	-0.00900755	0	nontarget
C12orf49	2410131K14Rik	ENSG00000111412.4	12	117153593	117175875	59.8437	0.588812	142.6	713	22282	5	0	58965	0	2	0	1	-0.000144191	-0.689602	0.322197	0.0344628	0.211112	0	nontarget
C12orf56	D930020B18Rik	ENSG00000185306.8	12	64660217	64784972	36.6774	0.424501	148.615	1932	124755	13	0	58881	0	2	0	0	0.339592	0.513474	0.504458	0.156019	0.373916	0	nontarget
C12orf57	Grcc10	ENSG00000111678.6	12	7052141	7055166	83.4766	0.64298	160	480	3025	3	0	58801	0	4	0	3	0.225961	-1.84658	0.550461	-0.361184	-0.050887	0	nontarget
C12orf60	BC049715	ENSG00000182993.3	12	14956506	15059520	68.2866	0.44396	405.5	811	103014	2	0	58888	0	1	0	0	-0.0991931	0.0118082	0.282921	0.229882	0.387903	0	nontarget
C12orf71	1700034J05Rik	ENSG00000214700.5	12	27233991	27235447	65.706	0.504511	443.5	887	1456	2	1	58692	2	0	1	0	-1.04856	-0.0442658	-0.490722	0.852312	0.349162	0	nontarget
C14orf119	1700123O20Rik	ENSG00000179933.4	14	23563974	23569665	120.603	0.565401	373.5	747	5691	2	0	58918	0	1	0	0	0.408131	0.307195	0.860338	0.700709	0.945922	0	nontarget
C14orf39	4930447C04Rik	ENSG00000179008.4	14	60863187	60982261	66.2862	0.340544	109.765	1866	119074	17	0	58980	1	1	1	0	0.252204	1.20146	0.598306	0.888207	0.940228	0	nontarget
C14orf93	4931414P19Rik	ENSG00000100802.10	14	23456110	23479375	84.9625	0.514161	275.5	1653	23265	6	0	59034	0	10	0	8	0.213767	-2.87279	0.544207	-1.51019	-1.01116	0	nontarget
C15orf40	3110040N11Rik	ENSG00000169609.9	15	83657193	83680393	101.708	0.454498	112.4	562	23200	5	2	58765	1	1	0	0	0.814845	0.776678	1.04753	1.40149	1.4154	0	nontarget
C15orf41	BC052040	ENSG00000186073.7	15	36871812	37102449	56.0917	0.482004	84.8182	933	230637	11	0	58933	7	0	7	0	-2.84641	0.671291	-2.11223	0.898979	-0.563119	0	nontarget
C15orf48	AA467197	ENSG00000166920.6	15	45722727	45740959	73.1258	0.416793	71.6	358	18232	5	0	59013	0	4	0	0	0.292815	0.331019	0.597959	-0.348445	0.00147559	0	nontarget
C16orf46	1700030J22Rik	ENSG00000166455.9	16	81087102	81110872	116.257	0.432083	410	1230	23770	3	0	59051	5	3	5	0	-2.84641	0.380786	-1.18632	0.0830415	-0.443854	0	nontarget
C16orf58	BC017158	ENSG00000140688.12	16	31500792	31520630	45.1151	0.598067	142.067	2131	19838	15	0	59017	0	3	0	1	0.397546	-0.26818	0.540938	-0.041219	0.197366	0	nontarget
C16orf70	D230025D16Rik	ENSG00000125149.7	16	67143861	67182442	123.873	0.47143	110.133	1652	38581	15	0	59051	0	1	0	1	1.34108	0.451277	1.48713	1.22501	1.58509	0	nontarget
C16orf78	4933402J07Rik	ENSG00000166152.3	16	49407734	49433342	60.0944	0.509802	165.6	828	25608	5	0	58908	0	0	0	0	-0.0413693	0.0631072	0.306807	0.706835	0.785543	0	nontarget
C16orf87	4921524J17Rik	ENSG00000155330.5	16	46830519	46865323	79.997	0.41323	122.25	489	34804	4	0	59047	0	12	0	1	0.296748	-0.464403	0.619584	-1.76691	-1.18919	0	nontarget
C16orf91	BC003965	ENSG00000174109.3	16	1469745	1479345	89.1392	0.625564	235.6	1178	9600	5	0	58846	0	0	0	0	0.322723	0.298875	0.628276	0.936252	1.07231	0	nontarget
C17orf49	0610010K14Rik	ENSG00000258315.1	17	6917814	6920844	93.7084	0.571936	117	585	3030	5	0	59049	0	0	0	0	0.367818	0.355891	0.686438	0.996561	1.14667	0	nontarget
C17orf53	BC030867	ENSG00000125319.10	17	42219274	42239844	89.7341	0.538722	221.667	1995	20570	9	3	59079	1	2	1	2	-0.0115644	-0.584127	1.35827	1.46855	1.50788	0	nontarget
C17orf58	1810010H24Rik	ENSG00000186665.8	17	65987217	65989765	86.621	0.515985	214	428	2548	2	2	58867	0	2	0	0	0.340081	0.358824	1.19595	0.789628	1.04543	0	nontarget
C17orf64	1700125H20Rik	ENSG00000141371.8	17	58469790	58508782	30.4621	0.52782	144.5	578	38992	4	1	58803	0	2	0	0	-0.241385	-0.0485703	0.376671	0.130228	0.267465	0	nontarget
C17orf75	5730455P16Rik	ENSG00000108666.5	17	30651584	30677042	85.1539	0.440857	122.3	1223	25458	10	1	59032	2	1	0	0	0.771261	0.786692	0.177094	1.00973	0.775991	0	nontarget
C17orf80	D11Wsu47e	ENSG00000141219.11	17	71228372	71245091	62.6238	0.528714	307.143	2150	16719	7	0	58955	0	3	0	1	-0.0135463	-0.72285	0.31991	-0.274576	-0.0425041	0	nontarget
C18orf21	2700062C07Rik	ENSG00000141428.12	18	33552046	33559241	71.1214	0.48536	138.6	693	7195	5	0	59059	1	0	1	0	-0.806717	0.164107	-0.0904612	0.800767	0.597773	0	nontarget
C18orf25	8030462N17Rik	ENSG00000152242.6	18	43753519	43846949	95.2664	0.483651	309	1236	93430	4	0	59059	0	0	0	0	0.27943	0.302535	0.618291	0.886361	1.04497	0	nontarget
C18orf32	BC031181	ENSG00000177576.6	18	47008028	47013622	127.61	0.380155	132	264	5594	2	0	59055	1	4	0	0	0.833007	0.648101	0.717324	0.0909434	0.383377	0	nontarget
C18orf54	4930503L19Rik	ENSG00000166845.9	18	51884287	51911588	76.917	0.384428	234.571	1642	27301	7	0	59076	0	5	0	2	0.43175	-1.03672	0.705345	-0.536219	-0.117587	0	nontarget
C19orf25	2310011J03Rik	ENSG00000119559.11	19	1461142	1479555	48.0328	0.666158	274.333	823	18413	3	0	58707	0	2	0	0	-0.143753	-0.0649218	0.210054	-0.0780676	0.0686244	0	nontarget
C19orf47	2310022A10Rik	ENSG00000160392.9	19	40825443	40854434	80.5408	0.588379	168.429	1179	28991	7	0	59082	0	2	0	0	0.324285	0.356042	0.588104	0.226861	0.461103	0	nontarget
C19orf53	D8Ertd738e	ENSG00000104979.4	19	13884982	13889276	88.0042	0.57863	106	318	4294	3	0	58908	1	1	1	0	-0.716573	0.203106	0.0148297	0.516166	0.424007	0	nontarget
C19orf54	BC024978	ENSG00000188493.10	19	41246761	41257458	57.8775	0.602504	167	1169	10697	7	0	59007	1	2	0	0	0.0863447	0.168025	-0.16075	0.0794204	0.0201314	0	nontarget
C19orf57	4930432K21Rik	ENSG00000132016.7	19	13993161	14017265	89.3281	0.57313	279.429	1956	24104	7	0	59050	16	2	13	0	-2.84641	0.321623	-2.62354	0.236273	-1.75906	0	nontarget
C1orf105	4930558K02Rik	ENSG00000180999.6	1	172389828	172437971	84.2676	0.431459	95.625	765	48143	8	0	59018	0	0	0	0	0.562926	0.588405	0.791665	1.04296	1.23568	0	nontarget
C1orf109	9930104L06Rik	ENSG00000116922.10	1	38147242	38157914	83.8368	0.491703	160	640	10672	4	0	59003	0	0	0	0	0.172109	0.198714	0.530709	0.855882	0.99051	0	nontarget
C1orf112	BC055324	ENSG00000000460.12	1	169631245	169823221	104.239	0.41824	126.217	2903	191976	23	0	58828	5	5	5	5	-1.91686	-1.4105	-0.572075	0.140895	-0.0798564	0	nontarget
C1orf131	2810004N23Rik	ENSG00000143633.8	1	231359509	231376933	82.3647	0.44552	143.857	1007	17424	7	0	58960	0	3	0	0	0.400465	0.416635	0.683353	-0.0221253	0.299785	0	nontarget
C1orf146	1700028K03Rik	ENSG00000203910.4	1	92683497	92711370	64.4773	0.350356	114.6	573	27873	5	0	59171	0	1	0	1	0.387786	-0.381512	0.666654	0.518693	0.766681	0	nontarget
C1orf174	A430005L14Rik	ENSG00000198912.6	1	3805689	3816857	57.0498	0.540668	189	756	11168	4	0	58990	0	4	0	0	-0.154511	-0.0486181	0.226152	-0.589683	-0.341481	0	nontarget
C1orf189	1700094D03Rik	ENSG00000163263.6	1	154171848	154178809	199.502	0.461014	82.5	330	6961	4	0	59129	6	2	4	1	-1.19036	0.556248	0.142609	1.69385	1.1032	0	nontarget
C1orf194	1700013F07Rik	ENSG00000179902.8	1	109648573	109656479	126.891	0.511906	100.8	504	7906	5	0	58636	48	3	35	0	-2.84641	0.654205	-2.62354	0.347721	-2.47163	0	nontarget
C1orf198	2310022B05Rik	ENSG00000119280.12	1	230972865	231005335	69.5926	0.554469	252	1008	32470	4	0	58836	0	4	0	0	-0.0373466	0.0408316	0.321528	-0.536894	-0.264259	0	nontarget
C1orf21	1700025G04Rik	ENSG00000116667.8	1	184356192	184598154	68.8139	0.428715	79.2	396	241962	5	0	59077	0	3	0	1	0.351434	-0.27995	0.540203	-0.152571	0.146584	0	nontarget
C1orf216	5730409E04Rik	ENSG00000142686.7	1	36179476	36185073	104.891	0.61406	696	696	5597	1	0	58674	0	0	0	0	0.127843	0.085991	0.574045	0.814136	0.949306	0	nontarget
C1orf35	2310033P09Rik	ENSG00000143793.8	1	228288427	228293112	34.062	0.661894	90.3333	542	4685	6	0	58838	0	0	0	0	-0.0296021	0.0804654	0.276799	0.724703	0.757417	0	nontarget
C1orf50	AU022252	ENSG00000164008.9	1	43232940	43263968	38.938	0.511325	176.286	1234	31028	7	0	58928	0	1	0	0	-0.154185	0.000969427	0.195943	0.269744	0.367956	0	nontarget
C1orf52	2410004B18Rik	ENSG00000162642.9	1	85715639	85725355	78.4091	0.47713	189	567	9716	3	0	59019	0	1	0	0	0.0532853	0.0946279	0.438899	0.40143	0.579447	0	nontarget
C1orf53	2310009B15Rik	ENSG00000203724.6	1	197871777	197876497	64.7038	0.503278	149	447	4720	3	0	58928	1	12	0	0	-0.104106	-0.0194249	-0.24566	-1.97304	-1.5938	0	nontarget
C1orf54	BC028528	ENSG00000118292.4	1	150240600	150253327	145.59	0.476264	91	546	12727	6	0	58931	3	12	0	5	1.12497	-2.15316	0.124516	-1.04538	-0.641861	0	nontarget
[truncated: 4,708 more rows]

## Sheet: Mean Pct, all genes
Gene_name	Mean_pct
[truncated: 20,096 more rows]

[truncated: 1 more sheets: Mean Pct, gonia]
