# Supplementary material for: DAZL mediates a broad translational program regulating expansion and differentiation of spermatogonial progenitors
Source: eLife journal article supplement (doi:10.7554/elife.56523), 2020-07-20
Supplement: supp [file elife-56523-supp-v1.zip › elife_poa_e56523_Figure_4_source_data_1.xlsx]

## Sheet: Sheet1
Figure 4 - source data 1
Tab Name	Description
Peaks per gene	Number of replicated DAZL peaks per gene.
3' UTR binding site positions	Relative and absolute positions of 3' UTR DAZL binding sites, obtained using metaplotR. For each gene, the most robustly expressed isoform in undifferentiated spermatogonia was used.
3' UTR random positions	Relative and absolute positions that were randomly generated to model a random distribution along the 3' UTR of DAZL-bound transcripts. For each transcript, the number of random positions is equal to the number of DAZL binding sites. Relative location (random_rel_location) format based on metaplotR output.
3' UTR UGUU(UorA) positions	Relative and absolute positions of all UGUU(U/A) motifs in the 3' UTRs of DAZL-bound transcripts. Relative location (UGUU(UorA)_rel_location) format based on metaplotR output.

## Sheet: peaks per gene
gene.id	no.peaks
1110004F10Rik	1
1110038F14Rik	1
1110065P20Rik	1
1190002N15Rik	11
1700030K09Rik	2
1700066M21Rik	1
1810013L24Rik	10
2010300C02Rik	1
2310057M21Rik	2
2510039O18Rik	3
2610001J05Rik	1
2610301B20Rik	2
4833420G17Rik	1
4833439L19Rik	2
4930452B06Rik	2
4930550L24Rik	1
4930579G24Rik	2
4931406P16Rik	1
4931428F04Rik	1
4932438A13Rik	2
4933416C03Rik	2
4933425L06Rik	1
5031439G07Rik	1
9530068E07Rik	2
9930021J03Rik	5
Aamp	2
Aasdhppt	1
Abca1	15
Abcc5	1
Abcd3	1
Abhd17a	1
Abhd17c	5
Abhd2	1
Abi1	6
Abl1	2
Abl2	2
Abraxas1	3
Acadm	1
Acbd3	7
Acly	5
Aco1	1
Aco2	1
Acsl1	1
Acsl3	5
Acss2	1
Actb	7
Actl6a	1
Actn1	1
Actr10	1
Actr6	2
Acvr2b	2
Adal	1
Adam10	1
Add3	2
Adgra3	1
Adgrg1	1
Adi1	2
Adipor2	1
Adk	2
Adnp	3
Ado	1
Adprh	3
Adss	2
Aebp2	2
Afdn	2
Aff3	9
Afg3l2	1
Aga	1
Agfg1	1
Agpat5	2
Agps	4
Ahctf1	2
Ahcyl1	1
Ahdc1	2
Ahi1	3
Ahsa2	4
AI597479	2
Aig1	1
Ajuba	1
Ak2	1
Ak4	4
Akap11	14
Akap13	3
Akap17b	2
Akap8	1
Akirin1	4
Akirin2	5
Akt3	2
Aldh1a2	1
Aldh3a2	2
Aldh7a1	1
Alg10b	3
Alg2	4
Alkbh1	1
Alkbh5	35
Als2	2
Amfr	6
Ammecr1l	12
Amot	2
Amotl2	1
Ampd2	6
Anapc1	1
Anapc10	1
Anapc11	2
Angel1	1
Angel2	2
Ank	1
Ankfy1	1
Ankrd10	7
Ankrd12	1
Ankrd13c	2
Ankrd17	2
Ankrd29	1
Ankrd45	1
Ankrd46	2
Anln	4
Anp32e	9
Anxa7	1
Ap1ar	3
Ap1g1	3
Ap2a1	1
Ap3s2	1
Apba2	4
Apbb1ip	1
Apc	2
Apex1	1
Api5	11
Aplp2	7
Appbp2	2
Appl1	1
Aqr	2
Araf	1
Arcn1	1
Arf1	3
Arf3	13
Arf4	30
Arf6	8
Arfgap3	1
Arfgef1	1
Arfip1	1
Arglu1	1
Arhgap1	1
Arhgap17	1
Arhgap29	8
Arhgap32	11
Arhgap44	2
Arhgap5	1
Arhgef1	1
Arhgef11	1
Arhgef18	6
Arhgef2	1
Arhgef3	1
Arhgef7	1
Arid1a	6
Arid4b	2
Arih1	4
Arih2	2
Arl14epl	3
Arl2bp	2
Arl5a	1
Arl5b	1
Arl6ip1	6
Arl6ip6	7
Arl8a	7
Armc8	2
Armcx2	1
Arntl	4
Arpc1a	6
Arpc2	1
Arpc3	1
Arpc5	2
Arpc5l	1
Arrdc3	38
Arrdc4	1
Asah1	4
Asb3	1
Asb8	1
Ascc3	1
Asf1a	3
Asz1	1
Atad1	6
Atad2	5
Atad2b	3
Atf1	5
Atf2	2
Atf7ip2	6
Atg101	1
Atg14	2
Atg5	3
Atic	3
Atl1	4
Atm	1
Atp11b	4
Atp11c	1
Atp2a2	1
Atp2b1	8
Atp2b4	1
Atp5b	1
Atp5g3	1
Atp6ap1	1
Atp6ap2	4
Atp6v1a	1
Atp6v1b2	5
Atp6v1f	1
Atp6v1g1	1
Atp6v1h	1
Atp7a	2
Atrx	1
Atxn2l	4
Atxn7l3b	13
Auts2	4
Avl9	1
Axin2	3
Azin1	12
B2m	1
B3gat2	1
B3gnt5	1
B4galt1	2
B4galt5	7
Bag4	2
Bahd1	5
Banf1	3
Baz1b	15
Baz2a	3
Baz2b	1
Bbip1	3
BC005537	1
BC048403	1
Bcap29	1
Bcap31	2
Bcas2	5
Bcl10	3
Bcl6b	4
Bcl7a	1
Bclaf1	3
Bcor	1
Bcorl1	1
Bcr	1
Bdp1	1
Becn1	9
Bend4	2
Bhlhe41	2
Bicc1	1
Bicd2	8
Birc6	1
Blcap	5
Blm	2
Bloc1s6	1
Bmi1	7
Bmp6	1
Bmpr1a	1
Bnc1	8
Bnc2	15
Bnip3	1
Bnip3l	4
Bod1	4
Braf	1
Brat1	1
Brd1	4
Brd2	1
Brd3	9
Brd4	12
Brd7	2
Brdt	1
Brk1	6
Brsk2	1
Brwd1	4
Btaf1	1
Btbd10	2
Btbd3	2
Btbd7	1
Bub1b	1
Bub3	5
Bzw1	7
C1d	6
Cab39	6
Cab39l	1
Cables2	1
Cacfd1	1
Cacul1	6
Cacybp	11
Cad	1
Cadm1	13
Calm1	2
Calm2	3
Calm3	1
Calr	1
Calu	8
Camk2g	1
Camkk2	4
Camsap1	1
Camsap2	2
Cand1	4
Cand2	2
Canx	20
Capn7	4
Caprin1	7
Capza2	4
Casc3	5
Casc4	5
Casp2	12
Casp7	5
Casp9	2
Cbfb	20
Cbl	1
Cblb	10
Cbll1	1
Cbx2	4
Cbx3	3
Cbx8	1
Ccar1	3
Ccdc112	7
Ccdc117	4
Ccdc12	1
Ccdc127	1
Ccdc138	1
Ccdc175	1
Ccdc25	1
Ccdc43	1
Ccdc6	16
Ccdc71l	1
Ccdc73	1
Ccnc	1
Ccnd1	11
Ccnd2	13
Ccng1	1
Ccni	4
Ccnjl	4
Ccnk	1
Ccnl1	1
Ccnl2	1
Ccny	4
Ccp110	3
Ccpg1	1
Cct2	3
Cct3	1
Cct4	1
Cct6a	16
Cct7	1
Cct8	10
Cd164	45
Cd24a	1
Cd9	1
Cdc20	1
Cdc23	1
Cdc25a	1
Cdc27	1
Cdc37l1	2
Cdc40	1
Cdc42	23
Cdc42bpa	1
Cdc42bpb	3
Cdc42ep4	1
Cdc42se2	4
Cdc5l	1
Cdc7	3
Cdc73	3
Cdca4	3
Cdca7	3
Cdca7l	17
Cdca8	2
Cdk13	3
Cdk17	13
Cdk2	10
Cdk6	1
Cdk8	3
Cdk9	1
Cdkn1b	5
Cdkn2a	1
Cdkn2aipnl	2
Cdon	1
Cds2	1
Cdt1	1
Cdyl	5
Cebpb	3
Cecr2	6
Celf1	23
Celf2	25
Cenpa	4
Cenpc1	2
Cenpf	4
Cenpq	1
Cep170	2
Cep55	2
Cep72	1
Cep85	9
Cers1	1
Cers2	1
Cers6	3
Cetn2	3
Cetn3	4
Cfdp1	1
Cfl2	1
Champ1	7
Chchd2	1
Chchd4	2
Chd4	2
Chd6	6
Chd7	2
Cherp	11
Chfr	7
Chic2	21
Chml	1
Chmp1a	3
Chmp1b	1
Chmp3	1
Chmp4b	2
Chmp7	5
Chn1	2
Chordc1	2
Chp1	1
Chsy1	1
Chtop	10
Chuk	4
Ciao1	2
Ciapin1	4
Cib1	1
Cirbp	33
Cited2	1
Ciz1	1
Ckap2	4
Ckap5	2
Cks1b	1
Clasp1	2
Clasp2	1
Cldnd1	1
Clic4	7
Clic6	2
Clint1	3
Cln5	8
Clns1a	1
Clock	4
Clptm1l	2
Clstn1	2
Clta	1
Cltc	6
Cmas	2
Cmip	1
Cmpk1	2
Cmtm6	3
Cnbp	27
Cnep1r1	2
Cnksr3	2
Cnn3	2
Cnot1	1
Cnot10	1
Cnot11	3
Cnot6	1
Cnot6l	12
Cnot7	2
Cnot9	3
Cntd1	3
Coa5	3
Cog2	1
Col9a3	3
Commd7	1
Commd8	1
Copa	3
Copb1	1
Copb2	2
Coprs	11
Cops7b	1
Cops8	6
Coq10b	3
Cox11	1
Cox14	2
Cox15	1
Cox7a2l	1
Cpeb1	3
Cpeb3	1
Cpeb4	1
Cpne1	7
Cpox	1
Cpsf3	1
Cpsf4	2
Cpsf6	8
Crabp1	1
Creb1	1
Crebrf	7
Creld2	1
Crim1	1
Crip2	1
Crk	1
Crkl	2
Crlf3	6
Crnkl1	3
Crot	2
Cry1	3
Cry2	1
Crybg1	5
Csde1	10
Cse1l	6
Csk	2
Csnk1a1	21
Csnk1d	1
Csnk1e	5
Csnk1g1	17
Csnk2a2	1
Cst9	1
Cstf2	4
Cstf2t	11
Cstf3	4
Ctbp1	6
Ctbp2	1
Ctdsp2	1
Ctdspl2	3
Cthrc1	1
Ctnna1	1
Ctnnb1	41
Ctnnbip1	1
Ctnnd1	1
Ctns	2
Ctps	5
Ctsl	7
Cttnbp2nl	1
Cul1	1
Cul2	3
Cul3	1
Cul4a	8
Cul4b	6
Cwc15	1
Cwc25	1
Cwf19l2	4
Cxcr4	1
Cxxc1	2
Cxxc5	6
Cyb561	1
Cyct	1
Cyhr1	1
Cyp51	2
D030056L22Rik	4
D10Wsu102e	6
D330045A20Rik	5
Dact1	1
Dag1	25
Dalrd3	1
Dap3	1
Dars	1
Dazap1	1
Dazap2	10
Dazl	69
Dbf4	2
Dbn1	2
Dcaf12	7
Dcaf13	1
Dcaf7	1
Dcaf8	6
Dck	9
Dcp1a	4
Dcp2	2
Dcps	1
Dctd	4
Dctn4	14
Dctn6	1
Dcun1d5	4
Ddb1	5
Ddhd1	7
Ddit4	7
Ddost	2
Ddr1	2
Ddx10	3
Ddx17	5
Ddx21	2
Ddx25	1
Ddx39b	2
Ddx3x	9
Ddx4	7
Ddx42	5
Ddx43	1
Ddx5	9
Ddx50	1
Ddx6	8
Dek	16
Dennd2c	5
Dennd5a	1
Dennd6a	3
Denr	2
Derl1	4
Desi2	1
Dgat2	4
Dgcr2	2
Dgkd	5
Dgke	1
Dhcr7	4
Dhdds	1
Dhx15	2
Dhx35	5
Dhx36	1
Dhx9	1
Diablo	9
Dicer1	2
Dido1	4
Dkc1	1
Dlat	2
Dlg1	2
Dlx1	1
Dmrt1	35
Dmwd	2
Dmxl2	1
Dnah11	3
Dnaja1	3
Dnaja2	9
Dnaja4	1
Dnajb11	3
Dnajb4	2
Dnajb6	3
Dnajb9	3
Dnajc10	2
Dnajc12	1
Dnajc14	1
Dnajc7	2
Dnajc8	2
Dnd1	3
Dnmt1	2
Dnmt3a	4
Dnmt3b	7
Dnttip1	1
Dnttip2	1
Dock1	1
Dock11	1
Dock3	1
Dock5	1
Dock9	1
Dopey2	1
Dot1l	1
Dpf2	2
Dph6	1
Dpysl2	2
Dr1	8
Dsn1	2
Dstyk	5
Dtna	1
Dusp14	3
Dusp9	1
Dut	8
Dvl2	3
Dvl3	1
Dync1li2	10
Dynll1	3
Dynll2	9
Dynlrb1	3
Dyrk1a	5
Dzip3	1
E130308A19Rik	3
E2f1	1
E2f5	4
E2f6	6
Echdc1	1
Eci2	1
Ect2	2
Edem1	1
Eed	1
Eef1e1	2
Eef2k	2
Efr3a	8
Eftud2	2
Egr1	3
Egr2	1
Egr4	11
Ehd1	1
Ehmt1	1
Ehmt2	1
Ei24	4
Eid1	1
Eid2	1
Eif1	1
Eif1a	11
Eif1b	3
Eif2ak1	1
Eif2s2	2
Eif2s3y	1
Eif3a	1
Eif3b	1
Eif3d	1
Eif3m	1
Eif4a1	4
Eif4a3	1
Eif4e	1
Eif4ebp2	1
Eif4enif1	3
Eif4g2	18
Eif5	4
Eif5a	3
Eif5a2	42
Eif5b	3
Elac2	1
Elavl1	18
Elavl2	16
Elf2	11
Elf4	1
Elk1	1
Ell	1
Elmod2	1
Eloc	2
Elovl1	1
Elovl5	3
Emc3	1
Emc6	1
Emd	3
Emg1	2
Eml4	8
Eml5	8
Enah	6
Enc1	11
Enpp4	6
Ensa	6
Entpd6	1
Ep300	2
Ep400	6
Epas1	1
Epb41	1
Epb41l2	5
Epb41l3	1
Epb41l4b	2
Epc2	1
Epm2aip1	1
Epn1	1
Epn2	9
Eps15	2
Erap1	1
Erbb2	1
Ercc6l	1
Ercc8	2
Erg	2
Erg28	3
Ergic1	2
Ergic2	1
Eri2	7
Erlin1	2
Erlin2	4
Ero1l	1
Errfi1	2
Esco2	3
Esf1	5
Esrp1	1
Esyt2	7
Etaa1	1
Etfbkmt	1
Etnk1	24
Ets1	8
Etv3	2
Etv6	4
Evi5	2
Ewsr1	1
Exd2	7
Extl2	2
Ezr	1
F11r	3
Faf2	2
Faim	1
Fam102a	6
Fam107b	1
Fam114a2	9
Fam117a	7
Fam117b	15
Fam118a	2
Fam118b	3
Fam120a	2
Fam133b	3
Fam168b	8
Fam169a	15
Fam174a	4
Fam192a	2
Fam193a	1
Fam204a	3
Fam208a	1
Fam208b	7
Fam20b	2
Fam214a	6
Fam216a	2
Fam221a	1
Fam222b	9
Fam241a	3
Fam32a	2
Fam45a	2
Fam49b	23
Fam53a	2
Fam53c	6
Fam76b	6
Fam83d	3
Fam91a1	7
Fam96a	2
Fam98b	1
Fancd2	2
Fance	1
Fancg	1
Farsa	1
Farsb	2
Fat1	4
Fbln1	1
Fbn2	4
Fbxl12	1
Fbxl14	2
Fbxl17	4
Fbxl20	1
Fbxl22	1
Fbxl3	3
Fbxl4	1
Fbxl5	5
Fbxl6	1
Fbxo11	2
Fbxo21	14
Fbxo28	5
Fbxo3	2
Fbxo30	2
Fbxo32	4
Fbxo33	2
Fbxo38	2
Fbxo8	1
Fbxo9	2
Fbxw11	5
Fbxw2	2
Fbxw7	2
Fcho2	3
Fchsd2	3
Fen1	4
Fgd5	2
Fgd6	3
Fgf13	2
Fgfr1	3
Fgfr1op	20
Fhl1	1
Fignl1	3
Fip1l1	4
Fis1	1
Fkbp1a	8
Fkbp3	1
Fkbp4	1
Fkbp6	11
Fkbp9	10
Flcn	2
Fmr1	13
Fmr1nb	1
Fn1	1
Fnbp1l	6
Fnbp4	1
Fndc3b	1
Fnip1	2
Foxf1	25
Foxj2	4
Foxj3	1
Foxk1	1
Foxn2	7
Foxo1	74
Foxp1	2
Frmd6	1
Frs2	5
Fst	5
Fto	2
Fubp1	20
Fubp3	9
Fus	1
Fuz	1
Fxr1	2
Fyn	1
Fyttd1	60
Fzd3	1
G2e3	4
G3bp1	11
G3bp2	17
Gabpb2	1
Galnt1	2
Galnt11	2
Galnt12	1
Ganab	2
Gas2l3	1
Gatad2a	17
Gclc	8
Gclm	1
Gcnt2	1
Gdi2	3
Gdpd1	1
Gfra1	1
Gga2	9
Ggnbp2	1
Ghitm	2
Gid8	2
Gigyf1	4
Gins2	2
Git2	1
Gjc1	1
Gkap1	2
Glce	22
Gle1	2
Gli3	4
Glipr2	1
Glis3	13
Glrx5	2
Gls	2
Glul	23
Glyr1	16
Gm21992	4
Gm364	1
Gm527	1
Gmcl1	3
Gmeb2	3
Gmfb	7
Gna11	1
Gna13	4
Gnai2	3
Gnai3	5
Gnb1	8
Gnb4	1
Gnpda1	1
Gnpnat1	2
Gnptg	1
Golga7	7
Golph3	7
Gopc	1
Gorasp1	6
Gosr2	2
Got2	1
Gpam	1
Gpatch8	9
Gpbp1	2
Gpc4	2
Gpkow	1
Gpn3	1
Gpt2	1
Grb10	5
Grb2	1
Grsf1	3
Gse1	21
Gsk3b	7
Gspt1	1
Gsr	66
Gtf2a1	21
Gtf2e1	12
Gtf2e2	14
Gtf2f2	2
Gtf2h1	7
Gtf2h3	4
Gtf2i	1
Gtpbp2	1
Gtpbp4	3
Gucy2c	1
H2afv	3
H2afy	11
H2afy2	3
H3f3a	1
H3f3b	7
Hat1	2
Haus4	1
Hbp1	4
Hccs	3
Hcfc1	15
Hdac1	1
Hdac2	1
Hdac6	1
Hdgf	3
Hdgfl3	18
Heatr1	2
Heatr6	1
Heca	6
Hectd1	1
Hectd2	3
Hells	5
Henmt1	2
Herc1	1
Herc3	2
Herpud1	1
Hes1	5
Hexim1	2
Hey1	5
Hhex	2
Hif1a	17
Higd2a	1
Hipk3	4
Hira	1
Hist1h2aa	1
Hist1h2ab	2
Hist1h2ai	1
Hist1h3a	1
Hist1h4a	1
Hist1h4d	3
Hist3h2a	1
Hivep2	1
Hjurp	1
Hltf	1
Hmg20a	3
Hmga1	3
Hmgb2	7
Hmgcr	14
Hmgcs1	7
Hmgn1	4
Hmgn5	4
Hmgxb4	2
Hmox1	3
Hnrnpa0	30
Hnrnpab	11
Hnrnpc	7
Hnrnpd	5
Hnrnpdl	2
Hnrnpf	2
Hnrnph1	6
Hnrnph2	1
Hnrnpk	5
Hnrnpl	18
Hnrnpll	1
Hnrnpm	1
Hnrnpr	4
Hnrnpu	4
Hnrnpul2	22
Homez	1
Hook1	3
Hp1bp3	15
Hprt	3
Hs2st1	11
Hsbp1	1
Hsd17b4	1
Hsd17b7	1
Hsf2	6
Hsf5	1
Hsp90aa1	2
Hsp90ab1	3
Hsp90b1	1
Hspa14	1
Hspa1a	1
Hspa1b	3
Hspa4	3
Hspa4l	2
Hspe1	1
Hsph1	1
Htatsf1	2
Huwe1	2
Hyou1	3
Iah1	1
Ibtk	4
Ice2	4
Icmt	1
Id4	8
Ide	1
Idh1	3
Ier3ip1	3
Iffo2	2
Ifrd1	1
Ift80	1
Igbp1b	1
Igf1r	11
Igfbp7	2
Igsf11	1
Igsf3	7
Igsf8	3
Ik	3
Ikbkap	7
Il6st	3
Ilf3	7
Ilk	1
Imp3	2
Imp4	1
Impad1	2
Inpp4a	1
Inpp5a	1
Inpp5f	2
Inppl1	1
Insig1	5
Ints10	2
Ints14	1
Ints7	7
Invs	4
Ip6k1	1
Ipmk	1
Ipo5	2
Iqcb1	1
Irf2bp2	8
Irf2bpl	11
Irf6	1
Isca1	1
Isg20l2	1
Ist1	3
Itfg1	1
Itga6	1
Itgb1	3
Itm2b	2
Itm2c	1
Itpa	4
Ivns1abp	4
Jade1	12
Jade2	1
Jade3	9
Jag1	1
Jak1	5
Jam3	1
Jarid2	15
Jkamp	2
Jmjd1c	3
Jmy	10
Josd1	5
Jund	9
Kansl1	25
Kansl2	2
Kat6a	19
Kat6b	1
Kat7	2
Kazn	4
Kbtbd7	7
Kcnab3	1
Kctd10	3
Kctd18	25
Kctd20	1
Kctd5	3
Kctd6	1
Kdm1a	1
Kdm1b	14
Kdm3b	4
Kdm5a	27
Kdm5b	11
Khdrbs1	5
Khdrbs3	2
Kidins220	1
Kif11	1
Kif1bp	1
Kif1c	2
Kif26a	9
Kif2c	2
Kif5c	18
Kin	1
Kit	1
Klf10	11
Klf11	24
Klf8	11
Klhl11	2
Klhl12	7
Klhl21	2
Klhl24	4
Klhl9	3
Kmt2a	1
Kmt2c	2
Kmt2d	1
Knop1	1
Kpna1	2
Kpna3	6
Kpna4	6
Kpnb1	8
Kras	2
Krit1	1
Krr1	1
Lamb1	1
Lamp1	21
Lamp2	4
Lamtor1	1
Laptm4a	3
Larp1	1
Larp4	1
Larp4b	3
Lars2	5
Lats2	3
Lbr	33
Lca5	1
Lcorl	1
Ldb1	2
Lef1	8
Lemd3	2
Leprotl1	3
Lgalsl	2
Lgmn	2
Lifr	1
Lig3	4
Lima1	2
Limk1	1
Lin28a	27
Lin28b	1
Lin7c	6
Lin9	1
Lipa	1
Llgl1	2
Lman1	10
Lman2	1
Lmbrd1	1
Lmnb1	4
Lnpep	3
Lnx2	1
Lonrf3	18
Lpar2	1
Lpcat3	2
Lpin2	1
Lrba	2
Lrig1	1
Lrp11	2
Lrrc1	1
Lrrc40	4
Lrrc42	2
Lrrc47	3
Lrrc58	3
Lrrc8a	5
Lsm1	4
Lsm14a	1
Lsm14b	12
Lsm2	1
Lsm3	3
Lsm4	1
Lsm6	1
Lsm7	1
Lsm8	2
Ltv1	1
Luc7l	7
Luc7l2	7
Luc7l3	1
Lyar	1
Lypla1	7
Lypla2	1
Lzts2	4
M6pr	4
Macf1	1
Maea	3
Maf1	1
Mafg	1
Mageb16	1
Mageb4	3
Maged1	2
Man2a1	1
Map1lc3b	1
Map3k1	3
Map3k12	8
Map3k15	2
Map3k4	2
Map3k5	6
Map4	1
Map4k3	1
Map4k4	24
Map7d2	3
Mapk1	20
Mapk14	2
Mapk1ip1l	1
Mapk6	4
Mapk8	6
Mapre1	3
March5	1
March6	1
March7	1
March8	10
Marcksl1	7
Marf1	15
Mark1	3
Mark2	1
Mark3	5
Marveld2	6
Mat2b	4
Matr3	10
Mb21d2	2
Mbd2	1
Mbnl1	1
Mbnl2	9
Mboat7	2
Mbtd1	2
Mcam	16
Mcm2	9
Mcm3	2
Mcm4	4
Mcmbp	9
Mdm2	8
Mdm4	4
Mdn1	15
Med10	3
Med13l	1
Med17	5
Med19	3
Med20	2
Med21	3
Med23	3
Med24	2
Med28	3
Med31	1
Med7	1
Men1	1
Metap2	3
Mettl8	1
Mex3c	4
Mex3d	3
Mfn1	1
Mfsd14a	4
Mga	3
Mgea5	51
Mgme1	3
Mical3	1
Midn	2
Mier1	9
Mier3	1
Mif	1
Mif4gd	1
Minos1	2
Minpp1	1
Mis18a	2
Mis18bp1	1
Mkl2	3
Mknk2	3
Mlf1	1
Mllt10	1
Mllt6	3
Mmgt2	1
Mob1a	2
Mob1b	4
Mob2	2
Mob4	4
Morc2a	1
Morc3	4
Morf4l2	1
Mpdz	7
Mphosph6	4
Mphosph8	7
Mpp5	6
Mpzl1	7
Mrfap1	3
Mrgbp	4
Mrpl17	1
Mrpl3	1
Mrpl44	1
Mrpl50	1
Mrps14	1
Mrps16	1
Mrps23	1
Mrps9	2
Msantd2	1
Msantd3	1
Msantd4	2
Msi1	1
Msi2	33
Msl1	7
Msl3l2	1
Mt1	7
Mt2	1
Mta1	3
Mta3	1
Mtf1	2
Mtf2	6
Mthfd2	1
Mtmr3	5
Mtmr6	2
Mtpn	2
Mtr	4
Mtss1	5
Mtx2	1
Mum1	3
Mum1l1	5
Mxi1	1
Mycbp	6
Mycbp2	1
Mycl	1
Mycn	1
Myef2	3
Myl12a	2
Mynn	7
Myo10	7
Myo1b	2
Myo1h	2
Myo9a	5
Myzap	2
Mzt1	2
N4bp1	4
Naa15	1
Naa30	2
Naa35	1
Naa40	7
Naa50	12
Nab1	3
Nab2	2
Nabp1	4
Nadk	7
Nae1	2
Nampt	2
Nap1l1	3
Nap1l4	4
Nars2	5
Nasp	1
Nbr1	7
Ncapd3	1
Ncapg2	1
Ncbp1	6
Ncbp2	1
Ncdn	1
Nck1	2
Nck2	1
Ncl	4
Ncoa2	5
Ncoa6	2
Ncstn	1
Ndel1	2
Ndfip1	5
Ndrg4	12
Ndufa6	1
Ndufaf4	2
Ndufb4	1
Ndufb9	1
Ndufs1	1
Necap1	1
Nectin3	1
Nedd4	26
Nedd8	1
Neil2	2
Nek1	3
Nek7	2
Nek9	1
Nelfa	6
Nelfb	1
Nfat5	24
Nfatc2ip	1
Nfatc3	4
Nfe2l1	11
Nfxl1	1
Nfya	4
Nfyb	2
Nid1	2
Nif3l1	1
Nifk	4
Ninl	1
Nip7	10
Nipa1	1
Nipa2	1
Nipbl	1
Nisch	3
Nkiras1	7
Nkrf	1
Nktr	1
Nkx3-1	1
Nlrp4c	1
Nlrp4f	1
Nme1	1
Nmt2	37
Noc2l	3
Noc3l	1
Noc4l	1
Noct	5
Nol3	1
Nol7	2
Nop16	3
Notch2	3
Npat	2
Npc1	1
Nploc4	11
Npm1	2
Nptn	3
Nr1d1	1
Nr1d2	4
Nras	3
Nrbp1	1
Nrep	1
Nsd2	3
Nsf	1
Nsmaf	1
Nsrp1	3
Nt5c2	1
Nub1	1
Nucks1	1
Nudcd3	1
Nudt11	7
Nudt16l1	1
Nudt3	1
Nudt4	2
Nufip2	26
Numa1	2
Nup107	3
Nup153	2
Nup155	4
Nup210	5
Nup62	3
Nup88	2
Nup93	5
Nupl1	2
Nusap1	1
Nvl	1
Nxf2	2
Nxt1	1
Oard1	2
Oat	1
Ocrl	1
Ogdh	1
Ogt	5
Oraov1	6
Orc3	3
Orc6	1
Ormdl2	1
Ormdl3	1
Osbpl1a	2
Otud4	10
Otud7b	1
Otulin	1
Oxr1	4
Oxsr1	3
P4hb	3
Pabpn1	4
Pacrgl	4
Pacsin2	2
Pafah1b2	22
Pafah2	1
Pag1	1
Paics	4
Paip1	2
Paip2	24
Pak1ip1	3
Pak2	5
Pald1	2
Pam	1
Pan2	1
Pank2	2
Pank3	2
Papola	5
Papolg	2
Papss1	1
Paqr9	1
Parg	4
Parp1	22
Parp12	4
Patl1	1
Patz1	13
Pawr	2
Pbdc1	1
Pbk	2
Pbrm1	3
Pbx2	6
Pcbp1	12
Pcbp2	10
Pcgf3	4
Pcgf5	5
Pcm1	5
Pcna	2
Pdap1	2
Pdcd10	2
Pdcd11	1
Pdcd4	8
Pdcd6	1
Pdcd6ip	1
Pdcd7	5
Pde7a	9
Pdgfb	1
Pdha1	2
Pdha2	2
Pdhb	5
Pdia3	18
Pdia4	6
Pdia6	1
Pdk3	1
Pdp1	4
Pds5b	4
Pdzd2	1
Pdzd7	4
Pdzd8	4
Pef1	1
Peg10	14
Peli1	4
Peli2	1
Per1	2
Pet2	2
Pex13	1
Pfas	2
Pfdn2	1
Pfn1	2
Pfn2	1
Pgap1	3
Pgd	1
Pggt1b	3
Pgm2l1	19
Phactr4	1
Phc2	2
Phf13	77
Phf14	1
Phf2	1
Phf20	9
Phf21a	9
Phf23	1
Phf5a	3
Phf8	10
Phip	2
Phka1	2
Phtf2	8
Pi4k2a	1
Pi4kb	1
Pias2	12
Picalm	1
Pigw	1
Pik3c2a	1
Pik3ca	1
Pik3r3	19
Pikfyve	2
Pilra	1
Pin1	4
Pip4k2a	7
Pip4k2b	12
Pip5k1c	1
Pisd	1
Piwil2	42
Pja2	1
Pkig	1
Plaa	3
Plagl2	3
Plcb3	1
Pld6	2
Plekha1	2
Plekha8	1
Plekhb2	9
Plekhf2	9
Plekhg2	1
Plekhj1	1
Plk4	1
Plod2	6
Plxna1	1
Pmaip1	3
Pnma5	1
Pnn	5
Pnpla8	9
Pnrc1	1
Poglut1	1
Pogz	24
Pola1	3
Poldip3	20
Pole4	1
Polr1c	1
Polr2b	1
Polr2d	4
Polr2e	2
Polr2h	1
Polr2m	5
Polr3b	6
Polr3g	1
Pomp	2
Pot1a	4
Pou2f1	5
Pou3f1	4
Ppa1	1
Ppat	1
Ppfia1	5
Ppfibp1	2
Pphln1	5
Ppic	1
Ppil1	4
Ppil4	5
Ppm1b	1
Ppm1g	1
Ppp1ca	1
Ppp1cb	17
Ppp1r12a	2
Ppp1r15b	18
Ppp1r18	1
Ppp1r8	1
Ppp2ca	3
Ppp2cb	2
Ppp2r1b	22
Ppp2r5e	1
Ppp3ca	2
Ppp3r1	24
Ppp4c	3
Ppp4r2	6
Ppp4r3a	1
Ppp6r3	5
Pprc1	1
Pqbp1	1
Pramef12	3
Pramef8	1
Pramel1	2
Prc1	1
Prdm16	1
Prdm2	8
Prdm4	1
Prdx1	2
Prelid3b	5
Prep	1
Prex1	1
Prg4	2
Prkaca	2
Prkag2	5
Prkar1a	30
Prkar2b	2
Prkch	1
Prkci	11
Prkd3	3
Prmt5	3
Prpf19	1
Prpf38a	1
Prpf38b	6
Prpf39	1
Prpf4b	2
Prr14l	2
Prr23a3	1
Prr7	1
Prrc2a	2
Prtg	27
Prune1	6
Psap	6
Psat1	2
Psip1	18
Psma1	1
Psma2	2
Psma7	1
Psma8	6
Psmb1	1
Psmb2	1
Psmc6	2
Psmd10	1
Psmd14	1
Psme3	17
Psmg1	1
Psmg2	1
Pspc1	2
Ptbp1	2
Ptbp2	7
Ptbp3	52
Ptch1	12
Pten	1
Ptges3	4
Ptk2	4
Ptk7	5
Ptma	2
Ptpa	2
Ptpdc1	1
Ptpn12	20
Ptpn2	1
Ptpra	2
Ptprf	7
Pum1	8
Pum2	5
Pus7l	1
Pwp1	5
Pwwp2a	1
Pxdn	1
Pxt1	2
Pygo2	9
Pym1	1
Qdpr	14
Qk	6
Qrich1	2
Qser1	6
R3hdm1	4
R3hdm2	4
Rab11a	4
Rab11b	1
Rab11fip4	1
Rab14	3
Rab18	10
Rab1a	17
Rab21	1
Rab22a	1
Rab2a	5
Rab40c	1
Rab4b	1
Rab5a	1
Rab6a	9
Rab6b	1
Rab7	6
Rabep1	1
Rabl3	5
Rack1	1
Rad17	1
Rad18	3
Rad21	9
Rad23b	6
Rad51	2
Radil	2
Rai1	5
Rai14	3
Ralbp1	6
Ralgapa1	1
Ralgps2	3
Ran	2
Ranbp1	1
Ranbp2	8
Ranbp9	10
Rap1b	7
Rap2b	4
Rap2c	7
Rapgef2	2
Rarg	1
Rars2	1
Rasa1	7
Rasa2	1
Rasa3	1
Rasd2	1
Rasl11b	1
Rassf3	16
Rb1	2
Rbbp4	13
Rbbp5	2
Rbbp6	10
Rbbp7	1
Rbfox2	14
Rbm12	4
Rbm14	1
Rbm18	1
Rbm22	2
Rbm25	3
Rbm33	3
Rbm38	8
Rbm39	2
Rbm42	1
Rbm46	9
Rbm4b	1
Rbm6	1
Rbm7	9
Rbm8a	3
Rbms1	2
Rbmxl1	1
Rbmxl2	2
Rbpj	1
Rbx1	5
Rc3h1	1
Rc3h2	1
Rcan1	7
Rcan3	2
Rcc2	8
Rchy1	2
Rdh10	1
Rdx	4
Reck	1
Reln	7
Rere	13
Rest	7
Retreg2	3
Rev1	3
Rffl	4
Rftn1	2
Rfwd3	5
Rfx7	1
Rgmb	4
Rgs12	1
Rheb	4
Rhebl1	2
Rhno1	1
Rhobtb1	1
Rhpn2	1
Ric1	1
Rictor	9
Rif1	16
Rimklb	7
Rin2	9
Riox1	1
Ripk4	4
Rlf	2
Rlim	9
Rmnd5a	2
Rnaset2b	1
Rnf10	1
Rnf11	4
Rnf114	26
Rnf115	6
Rnf138	48
Rnf139	2
Rnf14	3
Rnf146	1
Rnf149	19
Rnf167	1
Rnf17	1
Rnf187	1
Rnf2	5
Rnf20	1
Rnf216	21
Rnf219	6
Rnf220	1
Rnf34	6
Rnf38	11
Rnf4	4
Rnf41	4
Rnf44	51
Rnf6	4
Rnf7	4
Rnf8	1
Rnft1	2
Rngtt	1
Rnmt	3
Robo1	12
Rock1	3
Rock2	8
Ropn1l	1
Rpa1	5
Rpa2	12
Rpia	22
Rpl10l	7
Rpl18	1
Rpl32	1
Rpl37a	2
Rpl39l	2
Rpl7l1	1
Rpl8	1
Rpn1	13
Rpp14	1
Rprd2	2
Rps21	1
Rps26	1
Rps27l	1
Rps3	3
Rps6ka3	6
Rraga	5
Rragd	6
Rras2	6
Rrp8	1
Rrs1	4
Rspo2	5
Rspry1	2
Rsrc2	1
Rtca	1
Rtkn2	1
Rtn3	5
Rtn4	1
Rundc3b	3
Ryk	6
S100pbp	5
Sae1	9
Safb	6
Sall1	5
Sall4	15
Samd11	3
Samd4b	4
Samhd1	1
Sar1a	1
Sarnp	1
Sart3	2
Sash1	3
Satb1	1
Sav1	6
Sbk1	9
Sbno1	55
Scaf11	1
Scaf8	1
Scamp1	2
Scamp4	1
Scaper	2
Scd2	4
Scml2	10
Scrib	2
Sdad1	15
Sdc4	83
Sdcbp	11
Sde2	4
Sdhc	5
Sdhd	2
Sec11a	1
Sec22b	1
Sec23a	1
Sec23b	1
Sec23ip	2
Sec24d	1
Sec61a1	7
Sec62	8
Selenof	3
Selenoh	2
Selenok	4
Selenos	1
Sema4d	9
Senp1	2
Sept11	2
Sept2	6
Sept7	6
Serbp1	3
Serinc3	4
Serinc5	4
Serpine2	2
Serpinh1	2
Sertad3	3
Sertad4	15
Sesn3	2
Set	1
Setd1a	3
Setd3	3
Setd5	7
Setdb1	1
Setx	11
Sf1	8
Sf3a1	11
Sf3b1	2
Sf3b3	2
Sf3b6	1
Sfmbt1	2
Sfmbt2	3
Sfpq	41
Sfr1	5
Sfrp1	4
Sfrp2	2
Sgk1	3
Sgk3	14
Sgpl1	2
Sgpp1	5
Sgsm3	1
Sgta	1
Sh2b1	8
Sh3bgrl2	12
Sh3bp4	1
Shc1	1
Shcbp1l	3
Shmt1	3
Shmt2	2
Shprh	1
Shroom3	3
Shroom4	1
Siah1b	2
Siah2	1
Sik1	4
Sik3	6
Sin3b	2
Sipa1	1
Sipa1l2	1
Sipa1l3	2
Sirt1	1
Six1	1
Six4	1
Skap2	2
Ski	37
Skil	2
Skp1a	15
Slain1	2
Slbp	6
Slc12a2	3
Slc12a6	5
[truncated: 634 more rows]

## Sheet: 3' UTR binding site positions
chr	coord	gene_name	refseqID	rel_location	utr5_st	utr5_end	cds_st	cds_end	utr3_st	utr3_end	utr5_size	cds_size	utr3_size
chr1	4845124	Lypla1	NM_008866	2.06283	891	801	800	108	107	-1611	90	692	1718
chr1	4845354	Lypla1	NM_008866	2.19663	1121	1031	1030	338	337	-1381	90	692	1718
chr1	4846164	Lypla1	NM_008866	2.66783	1931	1841	1840	1148	1147	-571	90	692	1718
chr1	4846309	Lypla1	NM_008866	2.75218	2076	1986	1985	1293	1292	-426	90	692	1718
chr1	4846420	Lypla1	NM_008866	2.81675	2187	2097	2096	1404	1403	-315	90	692	1718
chr1	4846448	Lypla1	NM_008866	2.83304	2215	2125	2124	1432	1431	-287	90	692	1718
chr1	4846612	Lypla1	NM_008866	2.92845	2379	2289	2288	1596	1595	-123	90	692	1718
chr1	5162374	Atp6v1h	NM_133826	2.54427	1887	1661	1660	209	208	-175	226	1451	383
chr1	9546873	Rrs1	NM_021511	2.30216	1465	1350	1349	252	251	-582	115	1097	833
chr1	9547100	Rrs1	NM_021511	2.57434	1692	1577	1576	479	478	-355	115	1097	833
chr1	9547127	Rrs1	NM_021511	2.60671	1719	1604	1603	506	505	-328	115	1097	833
chr1	9547380	Rrs1	NM_021511	2.91007	1972	1857	1856	759	758	-75	115	1097	833
chr1	9720630	Vcpip1	NM_173443	2.65734	7740	7515	7514	3852	3851	-2008	225	3662	5859
chr1	9723201	Vcpip1	NM_173443	2.2186	5169	4944	4943	1281	1280	-4579	225	3662	5859
chr1	9723384	Vcpip1	NM_173443	2.18737	4986	4761	4760	1098	1097	-4762	225	3662	5859
chr1	9723524	Vcpip1	NM_173443	2.16348	4846	4621	4620	958	957	-4902	225	3662	5859
chr1	9723642	Vcpip1	NM_173443	2.14334	4728	4503	4502	840	839	-5020	225	3662	5859
chr1	9723696	Vcpip1	NM_173443	2.13413	4674	4449	4448	786	785	-5074	225	3662	5859
chr1	9723741	Vcpip1	NM_173443	2.12645	4629	4404	4403	741	740	-5119	225	3662	5859
chr1	9723765	Vcpip1	NM_173443	2.12235	4605	4380	4379	717	716	-5143	225	3662	5859
chr1	9723775	Vcpip1	NM_173443	2.12065	4595	4370	4369	707	706	-5153	225	3662	5859
chr1	9723811	Vcpip1	NM_173443	2.11451	4559	4334	4333	671	670	-5189	225	3662	5859
chr1	9724016	Vcpip1	NM_173443	2.07952	4354	4129	4128	466	465	-5394	225	3662	5859
chr1	9724057	Vcpip1	NM_173443	2.07253	4313	4088	4087	425	424	-5435	225	3662	5859
chr1	9724063	Vcpip1	NM_173443	2.0715	4307	4082	4081	419	418	-5441	225	3662	5859
chr1	9724103	Vcpip1	NM_173443	2.06468	4267	4042	4041	379	378	-5481	225	3662	5859
chr1	9724164	Vcpip1	NM_173443	2.05427	4206	3981	3980	318	317	-5542	225	3662	5859
chr1	9724222	Vcpip1	NM_173443	2.04437	4148	3923	3922	260	259	-5600	225	3662	5859
chr1	9724233	Vcpip1	NM_173443	2.04249	4137	3912	3911	249	248	-5611	225	3662	5859
chr1	9724270	Vcpip1	NM_173443	2.03618	4100	3875	3874	212	211	-5648	225	3662	5859
chr1	9724451	Vcpip1	NM_173443	2.00529	3919	3694	3693	31	30	-5829	225	3662	5859
chr1	9899096	Sgk3	NM_133220	2.05601	2042	1697	1696	206	205	-3472	345	1490	3677
chr1	9899123	Sgk3	NM_133220	2.06335	2069	1724	1723	233	232	-3445	345	1490	3677
chr1	9899183	Sgk3	NM_133220	2.07966	2129	1784	1783	293	292	-3385	345	1490	3677
chr1	9899194	Sgk3	NM_133220	2.08265	2140	1795	1794	304	303	-3374	345	1490	3677
chr1	9899200	Sgk3	NM_133220	2.08428	2146	1801	1800	310	309	-3368	345	1490	3677
chr1	9899228	Sgk3	NM_133220	2.0919	2174	1829	1828	338	337	-3340	345	1490	3677
chr1	9899238	Sgk3	NM_133220	2.09462	2184	1839	1838	348	347	-3330	345	1490	3677
chr1	9899244	Sgk3	NM_133220	2.09625	2190	1845	1844	354	353	-3324	345	1490	3677
chr1	9899269	Sgk3	NM_133220	2.10305	2215	1870	1869	379	378	-3299	345	1490	3677
chr1	9899284	Sgk3	NM_133220	2.10712	2230	1885	1884	394	393	-3284	345	1490	3677
chr1	9899542	Sgk3	NM_133220	2.17727	2488	2143	2142	652	651	-3026	345	1490	3677
chr1	9899606	Sgk3	NM_133220	2.19467	2552	2207	2206	716	715	-2962	345	1490	3677
chr1	9899779	Sgk3	NM_133220	2.24171	2725	2380	2379	889	888	-2789	345	1490	3677
chr1	9899816	Sgk3	NM_133220	2.25177	2762	2417	2416	926	925	-2752	345	1490	3677
chr1	10137621	Arfgef1	NM_001102430	2.91396	6927	6752	6751	1211	1210	-114	175	5540	1324
chr1	12859865	Sulf1	NM_172294	2.66863	4101	3636	3635	1023	1022	-507	465	2612	1529
chr1	13139288	Ncoa2	NM_008678	2.94995	8083	7862	7861	3473	3472	-183	221	4388	3655
chr1	13139304	Ncoa2	NM_008678	2.94557	8067	7846	7845	3457	3456	-199	221	4388	3655
chr1	13139359	Ncoa2	NM_008678	2.93053	8012	7791	7790	3402	3401	-254	221	4388	3655
chr1	13139482	Ncoa2	NM_008678	2.89688	7889	7668	7667	3279	3278	-377	221	4388	3655
chr1	13139568	Ncoa2	NM_008678	2.87336	7803	7582	7581	3193	3192	-463	221	4388	3655
chr1	15843264	Terf1	NM_009352	2.18763	1479	1448	1447	182	181	-788	31	1265	969
chr1	15843268	Terf1	NM_009352	2.19175	1483	1452	1451	186	185	-784	31	1265	969
chr1	15843271	Terf1	NM_009352	2.19485	1486	1455	1454	189	188	-781	31	1265	969
chr1	15843385	Terf1	NM_009352	2.31237	1600	1569	1568	303	302	-667	31	1265	969
chr1	16132473	Rdh10	NM_133832	2.93204	2217	2082	2081	1056	1055	-77	135	1025	1132
chr1	16344619	Stau2	NM_001347044	2.76688	2897	2615	2614	1079	1078	-328	282	1535	1406
chr1	16570164	Ube2w	NM_025773	2.42582	1600	1561	1560	1105	1104	-1490	39	455	2594
chr1	16570213	Ube2w	NM_025773	2.40694	1551	1512	1511	1056	1055	-1539	39	455	2594
chr1	16570269	Ube2w	NM_025773	2.38536	1495	1456	1455	1000	999	-1595	39	455	2594
chr1	16570293	Ube2w	NM_025773	2.37611	1471	1432	1431	976	975	-1619	39	455	2594
chr1	16570341	Ube2w	NM_025773	2.35761	1423	1384	1383	928	927	-1667	39	455	2594
chr1	16570665	Ube2w	NM_025773	2.23276	1099	1060	1059	604	603	-1991	39	455	2594
chr1	16571000	Ube2w	NM_025773	2.10366	764	725	724	269	268	-2326	39	455	2594
chr1	16642888	Eloc	NM_026456	2.76482	831	739	738	400	399	-123	92	338	522
chr1	16643257	Eloc	NM_026456	2.05927	462	370	369	31	30	-492	92	338	522
chr1	16677492	Tmem70	NM_026392	2.07882	948	832	831	67	66	-783	116	764	849
chr1	16677596	Tmem70	NM_026392	2.20118	1052	936	935	171	170	-679	116	764	849
chr1	16677704	Tmem70	NM_026392	2.32824	1160	1044	1043	279	278	-571	116	764	849
chr1	20803190	Mcm3	NM_008563	2.54508	2808	2705	2704	266	265	-222	103	2438	487
chr1	20803228	Mcm3	NM_008563	2.46721	2770	2667	2666	228	227	-260	103	2438	487
chr1	23845658	B3gat2	NM_172124	2.17634	2154	1446	1445	471	470	-2200	708	974	2670
chr1	23845658	Smap1	NM_028534	2.95896	2319	2094	2093	771	770	-33	225	1322	803
chr1	24762958	Lmbrd1	NM_026719	2.06227	2048	1836	1835	222	221	-3343	212	1613	3564
chr1	34444902	Imp4	NM_178601	2.33829	1403	1308	1307	432	431	-845	95	875	1276
chr1	34813257	Fam168b	NM_174997	2.99072	4983	4750	4749	4165	4164	-39	233	584	4203
chr1	34813272	Fam168b	NM_174997	2.98716	4968	4735	4734	4150	4149	-54	233	584	4203
chr1	34813292	Fam168b	NM_174997	2.9824	4948	4715	4714	4130	4129	-74	233	584	4203
chr1	34813303	Fam168b	NM_174997	2.97978	4937	4704	4703	4119	4118	-85	233	584	4203
chr1	34813347	Fam168b	NM_174997	2.96931	4893	4660	4659	4075	4074	-129	233	584	4203
chr1	34813379	Fam168b	NM_174997	2.9617	4861	4628	4627	4043	4042	-161	233	584	4203
chr1	34813425	Fam168b	NM_174997	2.95076	4815	4582	4581	3997	3996	-207	233	584	4203
chr1	34815698	Fam168b	NM_174997	2.41009	2542	2309	2308	1724	1723	-2480	233	584	4203
chr1	34877674	Plekhb2	NM_001357425	2.2501	1487	1293	1292	627	626	-1880	194	665	2506
chr1	34877685	Plekhb2	NM_001357425	2.25449	1498	1304	1303	638	637	-1869	194	665	2506
chr1	34877895	Plekhb2	NM_001357425	2.33825	1708	1514	1513	848	847	-1659	194	665	2506
chr1	34878235	Plekhb2	NM_001357425	2.47387	2048	1854	1853	1188	1187	-1319	194	665	2506
chr1	34878242	Plekhb2	NM_001357425	2.47667	2055	1861	1860	1195	1194	-1312	194	665	2506
chr1	34879345	Plekhb2	NM_001357425	2.91663	3158	2964	2963	2298	2297	-209	194	665	2506
chr1	34879481	Plekhb2	NM_001357425	2.97088	3294	3100	3099	2434	2433	-73	194	665	2506
chr1	34879507	Plekhb2	NM_001357425	2.98125	3320	3126	3125	2460	2459	-47	194	665	2506
chr1	34879551	Plekhb2	NM_001357425	2.9988	3364	3170	3169	2504	2503	-3	194	665	2506
chr1	37410606	Inpp4a	NM_030266	2.94599	5613	5167	5166	2347	2346	-134	446	2819	2480
chr1	37417119	Coa5	NM_198006	2.99029	3827	3692	3691	3467	3466	-34	135	224	3500
chr1	37417328	Coa5	NM_198006	2.93059	3618	3483	3482	3258	3257	-243	135	224	3500
chr1	37418632	Coa5	NM_198006	2.55813	2314	2179	2178	1954	1953	-1547	135	224	3500
chr1	37611708	2010300C02Rik	NM_028096	2.94492	4328	4077	4076	549	548	-32	251	3527	580
chr1	38052826	Eif5b	NM_198303	2.28789	5043	4764	4763	1113	1112	-2753	279	3650	3865
chr1	38052826	Rev1	NM_001359288	2.86711	4614	2448	2447	261	260	-40	2166	2186	300
chr1	38052847	Eif5b	NM_198303	2.29333	5064	4785	4784	1134	1133	-2732	279	3650	3865
chr1	38052847	Rev1	NM_001359288	2.79734	4593	2427	2426	240	239	-61	2166	2186	300
chr1	38052895	Eif5b	NM_198303	2.30574	5112	4833	4832	1182	1181	-2684	279	3650	3865
chr1	38052895	Rev1	NM_001359288	2.63787	4545	2379	2378	192	191	-109	2166	2186	300
chr1	38177358	Aff3	NM_001290814	2.60468	5883	5781	5780	2091	2090	-1367	102	3689	3457
chr1	38178166	Aff3	NM_001290814	2.37102	5075	4973	4972	1283	1282	-2175	102	3689	3457
chr1	38178170	Aff3	NM_001290814	2.36987	5071	4969	4968	1279	1278	-2179	102	3689	3457
chr1	38178178	Aff3	NM_001290814	2.36755	5063	4961	4960	1271	1270	-2187	102	3689	3457
chr1	38178196	Aff3	NM_001290814	2.36235	5045	4943	4942	1253	1252	-2205	102	3689	3457
chr1	38178201	Aff3	NM_001290814	2.3609	5040	4938	4937	1248	1247	-2210	102	3689	3457
chr1	38178215	Aff3	NM_001290814	2.35685	5026	4924	4923	1234	1233	-2224	102	3689	3457
chr1	38178398	Aff3	NM_001290814	2.30393	4843	4741	4740	1051	1050	-2407	102	3689	3457
chr1	38178410	Aff3	NM_001290814	2.30046	4831	4729	4728	1039	1038	-2419	102	3689	3457
chr1	39545295	Cnot11	NM_028043	2.018	1684	1547	1546	29	28	-1582	137	1517	1610
chr1	39545305	Cnot11	NM_028043	2.02421	1694	1557	1556	39	38	-1572	137	1517	1610
chr1	39545316	Cnot11	NM_028043	2.03104	1705	1568	1567	50	49	-1561	137	1517	1610
chr1	39551329	Rnf149	NM_001033135	2.97194	2400	2328	2327	1143	1142	-33	72	1184	1175
chr1	39551342	Rnf149	NM_001033135	2.96088	2387	2315	2314	1130	1129	-46	72	1184	1175
chr1	39551345	Rnf149	NM_001033135	2.95833	2384	2312	2311	1127	1126	-49	72	1184	1175
chr1	39551347	Rnf149	NM_001033135	2.95663	2382	2310	2309	1125	1124	-51	72	1184	1175
chr1	39551352	Rnf149	NM_001033135	2.95238	2377	2305	2304	1120	1119	-56	72	1184	1175
chr1	39551354	Rnf149	NM_001033135	2.95068	2375	2303	2302	1118	1117	-58	72	1184	1175
chr1	39551359	Rnf149	NM_001033135	2.94643	2370	2298	2297	1113	1112	-63	72	1184	1175
chr1	39551384	Rnf149	NM_001033135	2.92517	2345	2273	2272	1088	1087	-88	72	1184	1175
chr1	39551419	Rnf149	NM_001033135	2.89541	2310	2238	2237	1053	1052	-123	72	1184	1175
chr1	39551447	Rnf149	NM_001033135	2.8716	2282	2210	2209	1025	1024	-151	72	1184	1175
chr1	39551455	Rnf149	NM_001033135	2.8648	2274	2202	2201	1017	1016	-159	72	1184	1175
chr1	39551528	Rnf149	NM_001033135	2.80272	2201	2129	2128	944	943	-232	72	1184	1175
chr1	39551570	Rnf149	NM_001033135	2.76701	2159	2087	2086	902	901	-274	72	1184	1175
chr1	39551720	Rnf149	NM_001033135	2.63946	2009	1937	1936	752	751	-424	72	1184	1175
chr1	39551726	Rnf149	NM_001033135	2.63435	2003	1931	1930	746	745	-430	72	1184	1175
chr1	39551790	Rnf149	NM_001033135	2.57993	1939	1867	1866	682	681	-494	72	1184	1175
chr1	39552002	Rnf149	NM_001033135	2.39966	1727	1655	1654	470	469	-706	72	1184	1175
chr1	39552208	Rnf149	NM_001033135	2.22449	1521	1449	1448	264	263	-912	72	1184	1175
chr1	39552367	Rnf149	NM_001033135	2.08929	1362	1290	1289	105	104	-1071	72	1184	1175
chr1	40024896	Map4k4	NM_001252201	2.11514	4166	3850	3849	184	183	-1414	316	3665	1597
chr1	40025305	Map4k4	NM_001252201	2.37109	4575	4259	4258	593	592	-1005	316	3665	1597
chr1	40025377	Map4k4	NM_001252201	2.41615	4647	4331	4330	665	664	-933	316	3665	1597
chr1	40025397	Map4k4	NM_001252201	2.42866	4667	4351	4350	685	684	-913	316	3665	1597
chr1	40025408	Map4k4	NM_001252201	2.43554	4678	4362	4361	696	695	-902	316	3665	1597
chr1	40025463	Map4k4	NM_001252201	2.46996	4733	4417	4416	751	750	-847	316	3665	1597
chr1	40025544	Map4k4	NM_001252201	2.52065	4814	4498	4497	832	831	-766	316	3665	1597
chr1	40025584	Map4k4	NM_001252201	2.54568	4854	4538	4537	872	871	-726	316	3665	1597
chr1	40025665	Map4k4	NM_001252201	2.59637	4935	4619	4618	953	952	-645	316	3665	1597
chr1	40025675	Map4k4	NM_001252201	2.60263	4945	4629	4628	963	962	-635	316	3665	1597
chr1	40025702	Map4k4	NM_001252201	2.61952	4972	4656	4655	990	989	-608	316	3665	1597
chr1	40025726	Map4k4	NM_001252201	2.63454	4996	4680	4679	1014	1013	-584	316	3665	1597
chr1	40025733	Map4k4	NM_001252201	2.63892	5003	4687	4686	1021	1020	-577	316	3665	1597
chr1	40025754	Map4k4	NM_001252201	2.65207	5024	4708	4707	1042	1041	-556	316	3665	1597
chr1	40025760	Map4k4	NM_001252201	2.65582	5030	4714	4713	1048	1047	-550	316	3665	1597
chr1	40025766	Map4k4	NM_001252201	2.65957	5036	4720	4719	1054	1053	-544	316	3665	1597
chr1	40025779	Map4k4	NM_001252201	2.66771	5049	4733	4732	1067	1066	-531	316	3665	1597
chr1	40025792	Map4k4	NM_001252201	2.67584	5062	4746	4745	1080	1079	-518	316	3665	1597
chr1	40025934	Map4k4	NM_001252201	2.76471	5204	4888	4887	1222	1221	-376	316	3665	1597
chr1	40026236	Map4k4	NM_001252201	2.95369	5506	5190	5189	1524	1523	-74	316	3665	1597
chr1	40026240	Map4k4	NM_001252201	2.9562	5510	5194	5193	1528	1527	-70	316	3665	1597
chr1	40026254	Map4k4	NM_001252201	2.96496	5524	5208	5207	1542	1541	-56	316	3665	1597
chr1	40026259	Map4k4	NM_001252201	2.96809	5529	5213	5212	1547	1546	-51	316	3665	1597
chr1	40026269	Map4k4	NM_001252201	2.97434	5539	5223	5222	1557	1556	-41	316	3665	1597
chr1	42905609	Mrps9	NM_023514	2.60428	1344	1286	1285	113	112	-74	58	1172	186
chr1	42905641	Mrps9	NM_023514	2.7754	1376	1318	1317	145	144	-42	58	1172	186
chr1	43115634	AI597479	NM_133818	2.88462	3144	3091	3090	2392	2391	-312	53	698	2703
chr1	43115851	AI597479	NM_133818	2.96487	3361	3308	3307	2609	2608	-95	53	698	2703
chr1	43570484	Nck2	NM_010879	2.97109	2740	2285	2284	1142	1141	-34	455	1142	1175
chr1	51469528	Nabp1	NM_028696	2.97723	2797	2314	2313	1717	1716	-40	483	596	1756
chr1	51469808	Nabp1	NM_028696	2.81787	2517	2034	2033	1437	1436	-320	483	596	1756
chr1	51470141	Nabp1	NM_028696	2.62834	2184	1701	1700	1104	1103	-653	483	596	1756
chr1	51471122	Nabp1	NM_028696	2.07001	1203	720	719	123	122	-1634	483	596	1756
chr1	51751004	Myo1b	NM_001161817	2.11943	3806	3580	3579	169	168	-1246	226	3410	1414
chr1	51751089	Myo1b	NM_001161817	2.05936	3721	3495	3494	84	83	-1331	226	3410	1414
chr1	52457813	Nab1	NM_008667	2.41704	3123	2866	2865	1405	1404	-1964	257	1460	3368
chr1	52457837	Nab1	NM_008667	2.40991	3099	2842	2841	1381	1380	-1988	257	1460	3368
chr1	52457912	Nab1	NM_008667	2.38765	3024	2767	2766	1306	1305	-2063	257	1460	3368
chr1	53756217	Stk17b	NM_133810	2.64322	2572	2390	2389	1271	1270	-705	182	1118	1975
chr1	54473038	Pgap1	NM_001163314	2.99507	10540	10437	10436	7668	7667	-38	103	2768	7705
chr1	54479164	Pgap1	NM_001163314	2.2001	4414	4311	4310	1542	1541	-6164	103	2768	7705
chr1	54479464	Pgap1	NM_001163314	2.16117	4114	4011	4010	1242	1241	-6464	103	2768	7705
chr1	54987073	Sf3b1	NM_031179	2.12061	4287	4176	4175	261	260	-1903	111	3914	2163
chr1	54987182	Sf3b1	NM_031179	2.07024	4178	4067	4066	152	151	-2012	111	3914	2163
chr1	55072193	Coq10b	NM_001039710	2.43382	1223	1119	1118	390	389	-509	104	728	898
chr1	55072208	Coq10b	NM_001039710	2.4505	1238	1134	1133	405	404	-494	104	728	898
chr1	55072629	Coq10b	NM_001039710	2.9188	1659	1555	1554	826	825	-73	104	728	898
chr1	55091208	Hspe1	NM_008303	2.4467	658	397	396	88	87	-109	261	308	196
chr1	55152971	Mob4	NM_025283	2.07883	897	843	842	165	164	-1928	54	677	2092
chr1	55153012	Mob4	NM_025283	2.09842	938	884	883	206	205	-1887	54	677	2092
chr1	55153021	Mob4	NM_025283	2.10272	947	893	892	215	214	-1878	54	677	2092
chr1	55153049	Mob4	NM_025283	2.1161	975	921	920	243	242	-1850	54	677	2092
chr1	57385233	1700066M21Rik	NM_028546	2.89828	2817	2767	2766	1669	1668	-189	50	1097	1857
chr1	57955284	Kctd18	NM_001159864	2.85086	2431	2334	2333	1044	1043	-183	97	1289	1226
chr1	57955384	Kctd18	NM_001159864	2.76936	2331	2234	2233	944	943	-283	97	1289	1226
chr1	57955463	Kctd18	NM_001159864	2.70497	2252	2155	2154	865	864	-362	97	1289	1226
chr1	57955477	Kctd18	NM_001159864	2.69356	2238	2141	2140	851	850	-376	97	1289	1226
chr1	57955535	Kctd18	NM_001159864	2.64629	2180	2083	2082	793	792	-434	97	1289	1226
chr1	57955562	Kctd18	NM_001159864	2.62429	2153	2056	2055	766	765	-461	97	1289	1226
chr1	57955590	Kctd18	NM_001159864	2.60147	2125	2028	2027	738	737	-489	97	1289	1226
chr1	57955595	Kctd18	NM_001159864	2.59739	2120	2023	2022	733	732	-494	97	1289	1226
chr1	57955598	Kctd18	NM_001159864	2.59495	2117	2020	2019	730	729	-497	97	1289	1226
chr1	57955608	Kctd18	NM_001159864	2.5868	2107	2010	2009	720	719	-507	97	1289	1226
chr1	57955638	Kctd18	NM_001159864	2.56235	2077	1980	1979	690	689	-537	97	1289	1226
chr1	57955648	Kctd18	NM_001159864	2.5542	2067	1970	1969	680	679	-547	97	1289	1226
chr1	57955650	Kctd18	NM_001159864	2.55257	2065	1968	1967	678	677	-549	97	1289	1226
chr1	57955664	Kctd18	NM_001159864	2.54116	2051	1954	1953	664	663	-563	97	1289	1226
chr1	57955678	Kctd18	NM_001159864	2.52975	2037	1940	1939	650	649	-577	97	1289	1226
chr1	57955691	Kctd18	NM_001159864	2.51915	2024	1927	1926	637	636	-590	97	1289	1226
chr1	57955759	Kctd18	NM_001159864	2.46373	1956	1859	1858	569	568	-658	97	1289	1226
chr1	57956088	Kctd18	NM_001159864	2.1956	1627	1530	1529	240	239	-987	97	1289	1226
chr1	57956101	Kctd18	NM_001159864	2.185	1614	1517	1516	227	226	-1000	97	1289	1226
chr1	57956109	Kctd18	NM_001159864	2.17848	1606	1509	1508	219	218	-1008	97	1289	1226
chr1	57956114	Kctd18	NM_001159864	2.17441	1601	1504	1503	214	213	-1013	97	1289	1226
chr1	57956128	Kctd18	NM_001159864	2.163	1587	1490	1489	200	199	-1027	97	1289	1226
chr1	57956165	Kctd18	NM_001159864	2.13284	1550	1453	1452	163	162	-1064	97	1289	1226
chr1	57956170	Kctd18	NM_001159864	2.12877	1545	1448	1447	158	157	-1069	97	1289	1226
chr1	57956176	Kctd18	NM_001159864	2.12388	1539	1442	1441	152	151	-1075	97	1289	1226
chr1	58405332	Bzw1	NM_025824	2.11626	1854	1526	1525	266	265	-2022	328	1259	2287
chr1	58406045	Bzw1	NM_025824	2.42788	2567	2239	2238	979	978	-1309	328	1259	2287
chr1	58406191	Bzw1	NM_025824	2.4917	2713	2385	2384	1125	1124	-1163	328	1259	2287
chr1	58406197	Bzw1	NM_025824	2.49432	2719	2391	2390	1131	1130	-1157	328	1259	2287
chr1	58406209	Bzw1	NM_025824	2.49956	2731	2403	2402	1143	1142	-1145	328	1259	2287
chr1	58406256	Bzw1	NM_025824	2.5201	2778	2450	2449	1190	1189	-1098	328	1259	2287
chr1	58406520	Bzw1	NM_025824	2.63549	3042	2714	2713	1454	1453	-834	328	1259	2287
chr1	58461443	Nif3l1	NM_022988	2.12408	1755	1249	1248	118	117	-833	506	1130	950
chr1	59162961	Als2	NM_001159948	2.85574	6475	6172	6171	1216	1215	-205	303	4955	1420
chr1	59162961	Mpp4	NM_001164682	0.613734	428	-270	-271	-2235	-2236	-2553	698	1964	317
chr1	59162988	Als2	NM_001159948	2.83673	6448	6145	6144	1189	1188	-232	303	4955	1420
chr1	59162988	Mpp4	NM_001164682	0.575107	401	-297	-298	-2262	-2263	-2580	698	1964	317
chr1	59639973	Sumo1	NM_009460	2.29634	675	533	532	227	226	-539	142	305	765
chr1	59982007	Fam117b	NM_001037725	2.07733	2192	2035	2034	280	279	-3341	157	1754	3620
chr1	59983469	Fam117b	NM_001037725	2.48108	3654	3497	3496	1742	1741	-1879	157	1754	3620
chr1	59983480	Fam117b	NM_001037725	2.48412	3665	3508	3507	1753	1752	-1868	157	1754	3620
chr1	59983734	Fam117b	NM_001037725	2.55427	3919	3762	3761	2007	2006	-1614	157	1754	3620
chr1	59983737	Fam117b	NM_001037725	2.5551	3922	3765	3764	2010	2009	-1611	157	1754	3620
chr1	59983779	Fam117b	NM_001037725	2.56669	3964	3807	3806	2052	2051	-1569	157	1754	3620
chr1	59983791	Fam117b	NM_001037725	2.57001	3976	3819	3818	2064	2063	-1557	157	1754	3620
chr1	59983818	Fam117b	NM_001037725	2.57746	4003	3846	3845	2091	2090	-1530	157	1754	3620
chr1	59983929	Fam117b	NM_001037725	2.60812	4114	3957	3956	2202	2201	-1419	157	1754	3620
chr1	59984195	Fam117b	NM_001037725	2.68158	4380	4223	4222	2468	2467	-1153	157	1754	3620
chr1	59984566	Fam117b	NM_001037725	2.78404	4751	4594	4593	2839	2838	-782	157	1754	3620
chr1	59984595	Fam117b	NM_001037725	2.79205	4780	4623	4622	2868	2867	-753	157	1754	3620
chr1	59984626	Fam117b	NM_001037725	2.80061	4811	4654	4653	2899	2898	-722	157	1754	3620
chr1	59984801	Fam117b	NM_001037725	2.84894	4986	4829	4828	3074	3073	-547	157	1754	3620
chr1	59985142	Fam117b	NM_001037725	2.94311	5327	5170	5169	3415	3414	-206	157	1754	3620
chr1	63143670	Ndufs1	NM_001160039	2.67364	2690	2345	2344	161	160	-78	345	2183	238
chr1	64601564	Creb1	NM_009952	2.58382	5436	5212	5211	4186	4185	-2984	224	1025	7169
chr1	65159202	Idh1	NM_010497	2.30978	1676	1508	1507	263	262	-586	168	1244	848
chr1	65159216	Idh1	NM_010497	2.29329	1662	1494	1493	249	248	-600	168	1244	848
chr1	65159290	Idh1	NM_010497	2.20612	1588	1420	1419	175	174	-674	168	1244	848
chr1	65274405	Pikfyve	NM_001310624	2.13102	7098	6941	6940	647	646	-4291	157	6293	4937
chr1	65276293	Pikfyve	NM_001310624	2.51337	8986	8829	8828	2535	2534	-2403	157	6293	4937
chr1	71579131	Atic	NM_026195	2.62842	2338	2239	2238	460	459	-272	99	1778	731
chr1	71579321	Atic	NM_026195	2.88798	2528	2429	2428	650	649	-82	99	1778	731
chr1	71579362	Atic	NM_026195	2.94399	2569	2470	2469	691	690	-41	99	1778	731
chr1	71585698	Fn1	NM_010233	2.69553	8199	7948	7947	514	513	-225	251	7433	738
chr1	72713613	Rpl37a	NM_009084	2.19355	387	327	326	48	47	-200	60	278	247
chr1	72713639	Rpl37a	NM_009084	2.29839	413	353	352	74	73	-174	60	278	247
chr1	74268086	Arpc2	NM_029711	2.7029	1502	1194	1193	291	290	-123	308	902	413
chr1	74279882	Aamp	NM_146110	2.8934	1774	1660	1659	352	351	-42	114	1307	393
chr1	74279939	Aamp	NM_146110	2.74873	1717	1603	1602	295	294	-99	114	1307	393
chr1	74438755	Usp37	NM_176972	2.16388	3950	3576	3575	636	635	-3245	374	2939	3880
chr1	74438863	Usp37	NM_176972	2.13605	3842	3468	3467	528	527	-3353	374	2939	3880
chr1	74530214	Cnot9	NM_021383	2.6841	2637	2260	2259	1360	1359	-628	377	899	1987
chr1	74530276	Cnot9	NM_021383	2.71529	2699	2322	2321	1422	1421	-566	377	899	1987
chr1	74530336	Cnot9	NM_021383	2.74547	2759	2382	2381	1482	1481	-506	377	899	1987
chr1	75147284	Retreg2	NM_170755	2.26815	1931	1855	1854	229	228	-625	76	1625	853
chr1	75147466	Retreg2	NM_170755	2.48126	2113	2037	2036	411	410	-443	76	1625	853
chr1	75147503	Retreg2	NM_170755	2.52459	2150	2074	2073	448	447	-406	76	1625	853
chr1	75536710	Stk11ip	NM_027886	2.43182	3832	3694	3693	475	474	-625	138	3218	1099
chr1	78425116	Farsb	NM_011811	2.17372	1902	1848	1847	78	77	-371	54	1769	448
chr1	78425140	Farsb	NM_011811	2.12027	1878	1824	1823	54	53	-395	54	1769	448
chr1	78706738	Acsl3	NM_001033606	2.24322	2804	2486	2485	323	322	-1005	318	2162	1327
chr1	78706753	Acsl3	NM_001033606	2.25452	2819	2501	2500	338	337	-990	318	2162	1327
chr1	78706760	Acsl3	NM_001033606	2.25979	2826	2508	2507	345	344	-983	318	2162	1327
chr1	78706802	Acsl3	NM_001033606	2.29142	2868	2550	2549	387	386	-941	318	2162	1327
chr1	78706823	Acsl3	NM_001033606	2.30723	2889	2571	2570	408	407	-920	318	2162	1327
chr1	79781412	Mrpl44	NM_001081210	2.89251	1390	1276	1275	274	273	-33	114	1001	306
chr1	79794352	Serpine2	NM_009255	2.95468	2023	1847	1846	653	652	-31	176	1193	683
chr1	79794882	Serpine2	NM_009255	2.17982	1493	1317	1316	123	122	-561	176	1193	683
chr1	80266909	Cul3	NM_016716	2.11061	2932	2554	2553	247	246	-1986	378	2306	2232
chr1	82895136	Agfg1	NM_010472	2.01312	2020	1758	1757	78	77	-5865	262	1679	5942
chr1	84724147	Trip12	NM_133975	2.13736	6673	6549	6548	471	470	-2958	124	6077	3428
chr1	84724335	Trip12	NM_133975	2.08253	6485	6361	6360	283	282	-3146	124	6077	3428
chr1	84724342	Trip12	NM_133975	2.08049	6478	6354	6353	276	275	-3153	124	6077	3428
chr1	84724344	Trip12	NM_133975	2.07991	6476	6352	6351	274	273	-3155	124	6077	3428
chr1	84724356	Trip12	NM_133975	2.07641	6464	6340	6339	262	261	-3167	124	6077	3428
chr1	84724383	Trip12	NM_133975	2.06853	6437	6313	6312	235	234	-3194	124	6077	3428
chr1	84724406	Trip12	NM_133975	2.06183	6414	6290	6289	212	211	-3217	124	6077	3428
chr1	84724517	Trip12	NM_133975	2.02945	6303	6179	6178	101	100	-3328	124	6077	3428
chr1	84724589	Trip12	NM_133975	2.00846	6231	6107	6106	29	28	-3400	124	6077	3428
chr1	85849950	Cab39	NM_133781	2.30942	2178	1755	1754	729	728	-1627	423	1025	2355
chr1	85849980	Cab39	NM_133781	2.32216	2208	1785	1784	759	758	-1597	423	1025	2355
chr1	85850034	Cab39	NM_133781	2.34508	2262	1839	1838	813	812	-1543	423	1025	2355
chr1	85850340	Cab39	NM_133781	2.47496	2568	2145	2144	1119	1118	-1237	423	1025	2355
chr1	85851412	Cab39	NM_133781	2.92997	3640	3217	3216	2191	2190	-165	423	1025	2355
chr1	85851471	Cab39	NM_133781	2.95501	3699	3276	3275	2250	2249	-106	423	1025	2355
chr1	85908521	Itm2c	NM_022417	2.83302	1846	1693	1692	883	882	-177	153	809	1059
chr1	86350550	Ncl	NM_010880	2.01186	2425	2194	2193	70	69	-5831	231	2123	5900
chr1	86350556	Ncl	NM_010880	2.01085	2419	2188	2187	64	63	-5837	231	2123	5900
chr1	86350558	Ncl	NM_010880	2.01051	2417	2186	2185	62	61	-5839	231	2123	5900
chr1	86350589	Ncl	NM_010880	2.00525	2386	2155	2154	31	30	-5870	231	2123	5900
chr1	86530607	Ptma	NM_008972	2.85122	1279	931	930	595	594	-104	348	335	698
chr1	86530613	Ptma	NM_008972	2.8598	1285	937	936	601	600	-98	348	335	698
chr1	86606194	Cops7b	NM_172974	2.6067	2184	1773	1772	978	977	-634	411	794	1611
chr1	87942604	Dgkd	NM_177646	2.06544	3808	3795	3794	132	131	-1885	13	3662	2016
chr1	87943023	Dgkd	NM_177646	2.27318	4227	4214	4213	551	550	-1466	13	3662	2016
chr1	87943093	Dgkd	NM_177646	2.30788	4297	4284	4283	621	620	-1396	13	3662	2016
chr1	87944412	Dgkd	NM_177646	2.96182	5616	5603	5602	1940	1939	-77	13	3662	2016
chr1	87944449	Dgkd	NM_177646	2.98017	5653	5640	5639	1977	1976	-40	13	3662	2016
chr1	88263273	Hjurp	NM_198652	2.30166	4021	3912	3911	1908	1907	-4417	109	2003	6324
chr1	89153664	Sh3bp4	NM_133816	2.1803	3590	3202	3201	313	312	-1423	388	2888	1735
chr1	90612325	Cops8	NM_133805	2.06618	826	702	701	72	71	-1016	124	629	1087
chr1	90613003	Cops8	NM_133805	2.68934	1504	1380	1379	750	749	-338	124	629	1087
chr1	90613037	Cops8	NM_133805	2.72059	1538	1414	1413	784	783	-304	124	629	1087
chr1	90613068	Cops8	NM_133805	2.74908	1569	1445	1444	815	814	-273	124	629	1087
chr1	90613083	Cops8	NM_133805	2.76287	1584	1460	1459	830	829	-258	124	629	1087
chr1	90613087	Cops8	NM_133805	2.76654	1588	1464	1463	834	833	-254	124	629	1087
chr1	93507983	2019-09-02	NM_001159719	2.14181	1516	1375	1374	289	288	-1749	141	1085	2037
chr1	93507995	2019-09-02	NM_001159719	2.14769	1528	1387	1386	301	300	-1737	141	1085	2037
chr1	93508383	2019-09-02	NM_001159719	2.33808	1916	1775	1774	689	688	-1349	141	1085	2037
chr1	93508447	2019-09-02	NM_001159719	2.36948	1980	1839	1838	753	752	-1285	141	1085	2037
chr1	93509206	2019-09-02	NM_001159719	2.7419	2739	2598	2597	1512	1511	-526	141	1085	2037
chr1	93509500	2019-09-02	NM_001159719	2.88616	3033	2892	2891	1806	1805	-232	141	1085	2037
chr1	95334043	Fam174a	NM_026321	2.07732	865	677	676	104	103	-1241	188	572	1344
chr1	95334151	Fam174a	NM_026321	2.15762	973	785	784	212	211	-1133	188	572	1344
chr1	95334208	Fam174a	NM_026321	2.2	1030	842	841	269	268	-1076	188	572	1344
chr1	95334290	Fam174a	NM_026321	2.26097	1112	924	923	351	350	-994	188	572	1344
chr1	97821356	Pam	NM_013626	2.63408	3840	3391	3390	454	453	-262	449	2936	715
chr1	118298563	Tsn	NM_011650	2.9786	3207	2928	2927	2241	2240	-49	279	686	2289
chr1	118298567	Tsn	NM_011650	2.97686	3203	2924	2923	2237	2236	-53	279	686	2289
chr1	118298572	Tsn	NM_011650	2.97467	3198	2919	2918	2232	2231	-58	279	686	2289
chr1	118298576	Tsn	NM_011650	2.97293	3194	2915	2914	2228	2227	-62	279	686	2289
chr1	118298583	Tsn	NM_011650	2.96987	3187	2908	2907	2221	2220	-69	279	686	2289
chr1	118298596	Tsn	NM_011650	2.96419	3174	2895	2894	2208	2207	-82	279	686	2289
chr1	118298615	Tsn	NM_011650	2.9559	3155	2876	2875	2189	2188	-101	279	686	2289
chr1	118298617	Tsn	NM_011650	2.95502	3153	2874	2873	2187	2186	-103	279	686	2289
chr1	118298812	Tsn	NM_011650	2.86987	2958	2679	2678	1992	1991	-298	279	686	2289
chr1	118298815	Tsn	NM_011650	2.86856	2955	2676	2675	1989	1988	-301	279	686	2289
chr1	118298819	Tsn	NM_011650	2.86681	2951	2672	2671	1985	1984	-305	279	686	2289
chr1	118298821	Tsn	NM_011650	2.86594	2949	2670	2669	1983	1982	-307	279	686	2289
chr1	118298828	Tsn	NM_011650	2.86288	2942	2663	2662	1976	1975	-314	279	686	2289
chr1	118298847	Tsn	NM_011650	2.85459	2923	2644	2643	1957	1956	-333	279	686	2289
chr1	118298863	Tsn	NM_011650	2.8476	2907	2628	2627	1941	1940	-349	279	686	2289
chr1	118298870	Tsn	NM_011650	2.84454	2900	2621	2620	1934	1933	-356	279	686	2289
chr1	118298907	Tsn	NM_011650	2.82838	2863	2584	2583	1897	1896	-393	279	686	2289
chr1	118298959	Tsn	NM_011650	2.80568	2811	2532	2531	1845	1844	-445	279	686	2289
chr1	118298961	Tsn	NM_011650	2.8048	2809	2530	2529	1843	1842	-447	279	686	2289
chr1	118299019	Tsn	NM_011650	2.77948	2751	2472	2471	1785	1784	-505	279	686	2289
chr1	118299026	Tsn	NM_011650	2.77642	2744	2465	2464	1778	1777	-512	279	686	2289
chr1	118299037	Tsn	NM_011650	2.77162	2733	2454	2453	1767	1766	-523	279	686	2289
chr1	118299057	Tsn	NM_011650	2.76288	2713	2434	2433	1747	1746	-543	279	686	2289
chr1	118299068	Tsn	NM_011650	2.75808	2702	2423	2422	1736	1735	-554	279	686	2289
chr1	118299071	Tsn	NM_011650	2.75677	2699	2420	2419	1733	1732	-557	279	686	2289
chr1	118299101	Tsn	NM_011650	2.74367	2669	2390	2389	1703	1702	-587	279	686	2289
chr1	118299189	Tsn	NM_011650	2.70524	2581	2302	2301	1615	1614	-675	279	686	2289
chr1	118299774	Tsn	NM_011650	2.44978	1996	1717	1716	1030	1029	-1260	279	686	2289
chr1	118299893	Tsn	NM_011650	2.39782	1877	1598	1597	911	910	-1379	279	686	2289
chr1	118299949	Tsn	NM_011650	2.37336	1821	1542	1541	855	854	-1435	279	686	2289
chr1	118300282	Tsn	NM_011650	2.22795	1488	1209	1208	522	521	-1768	279	686	2289
chr1	118300418	Tsn	NM_011650	2.16856	1352	1073	1072	386	385	-1904	279	686	2289
chr1	118300451	Tsn	NM_011650	2.15415	1319	1040	1039	353	352	-1937	279	686	2289
chr1	118300542	Tsn	NM_011650	2.11441	1228	949	948	262	261	-2028	279	686	2289
chr1	118300584	Tsn	NM_011650	2.09607	1186	907	906	220	219	-2070	279	686	2289
chr1	118300695	Tsn	NM_011650	2.0476	1075	796	795	109	108	-2181	279	686	2289
chr1	118332965	Nifk	NM_026472	2.02697	1027	978	977	24	23	-866	49	953	889
chr1	118333368	Nifk	NM_026472	2.47978	1430	1381	1380	427	426	-463	49	953	889
chr1	118333406	Nifk	NM_026472	2.52247	1468	1419	1418	465	464	-425	49	953	889
chr1	118333546	Nifk	NM_026472	2.67978	1608	1559	1558	605	604	-285	49	953	889
chr1	118609298	Clasp1	NM_001293301	2.93355	7410	6663	6662	2304	2303	-164	747	4358	2467
chr1	118609410	Clasp1	NM_001293301	2.97893	7522	6775	6774	2416	2415	-52	747	4358	2467
chr1	119528050	Tmem185b	NM_146103	2.34296	1896	1540	1539	487	486	-933	356	1052	1419
chr1	125595562	Slc35f5	NM_028787	2.71156	2488	2246	2245	671	670	-272	242	1574	942
chr1	128236861	R3hdm1	NM_181750	2.10542	3937	3511	3510	103	102	-874	426	3407	976
chr1	128237035	R3hdm1	NM_181750	2.28352	4111	3685	3684	277	276	-700	426	3407	976
chr1	128237667	R3hdm1	NM_181750	2.9304	4743	4317	4316	909	908	-68	426	3407	976
chr1	128237709	R3hdm1	NM_181750	2.97339	4785	4359	4358	951	950	-26	426	3407	976
chr1	128363972	Dars	NM_177445	2.49715	1966	1768	1767	262	261	-265	198	1505	526
chr1	128588230	Cxcr4	NM_001356509	2.95186	1776	1687	1686	613	612	-31	89	1073	643
chr1	131288253	Srgap2	NM_001081011	2.26887	5037	4320	4319	1104	1103	-3002	717	3215	4105
chr1	131933564	Nucks1	NM_175294	2.461	3338	3063	3062	2358	2357	-2757	275	704	5114
chr1	132465694	Dstyk	NM_172516	2.63312	5119	4967	4966	2183	2182	-1265	152	2783	3447
chr1	132466635	Dstyk	NM_172516	2.90603	6060	5908	5907	3124	3123	-324	152	2783	3447
chr1	132466650	Dstyk	NM_172516	2.91038	6075	5923	5922	3139	3138	-309	152	2783	3447
chr1	132466655	Dstyk	NM_172516	2.91183	6080	5928	5927	3144	3143	-304	152	2783	3447
chr1	132466663	Dstyk	NM_172516	2.91415	6088	5936	5935	3152	3151	-296	152	2783	3447
chr1	132504098	Rbbp5	NM_001357486	2.16337	1950	1809	1808	306	305	-1567	141	1502	1872
chr1	132504497	Rbbp5	NM_001357486	2.3764	2349	2208	2207	705	704	-1168	141	1502	1872
chr1	132988381	Mdm4	NM_008575	2.58998	5021	4745	4744	3275	3274	-2276	276	1469	5550
chr1	132988399	Mdm4	NM_008575	2.58674	5003	4727	4726	3257	3256	-2294	276	1469	5550
chr1	132988447	Mdm4	NM_008575	2.57809	4955	4679	4678	3209	3208	-2342	276	1469	5550
chr1	132988516	Mdm4	NM_008575	2.56566	4886	4610	4609	3140	3139	-2411	276	1469	5550
chr1	133137721	Ppp1r15b	NM_133819	2.2863	3508	2928	2927	834	833	-2079	580	2093	2912
chr1	133137742	Ppp1r15b	NM_133819	2.29351	3529	2949	2948	855	854	-2058	580	2093	2912
chr1	133137753	Ppp1r15b	NM_133819	2.29729	3540	2960	2959	866	865	-2047	580	2093	2912
chr1	133137755	Ppp1r15b	NM_133819	2.29797	3542	2962	2961	868	867	-2045	580	2093	2912
chr1	133137760	Ppp1r15b	NM_133819	2.29969	3547	2967	2966	873	872	-2040	580	2093	2912
chr1	133137834	Ppp1r15b	NM_133819	2.32509	3621	3041	3040	947	946	-1966	580	2093	2912
chr1	133137840	Ppp1r15b	NM_133819	2.32715	3627	3047	3046	953	952	-1960	580	2093	2912
chr1	133137860	Ppp1r15b	NM_133819	2.33402	3647	3067	3066	973	972	-1940	580	2093	2912
chr1	133137866	Ppp1r15b	NM_133819	2.33608	3653	3073	3072	979	978	-1934	580	2093	2912
chr1	133138792	Ppp1r15b	NM_133819	2.65396	4579	3999	3998	1905	1904	-1008	580	2093	2912
chr1	133138797	Ppp1r15b	NM_133819	2.65568	4584	4004	4003	1910	1909	-1003	580	2093	2912
chr1	133138928	Ppp1r15b	NM_133819	2.70065	4715	4135	4134	2041	2040	-872	580	2093	2912
chr1	133138953	Ppp1r15b	NM_133819	2.70923	4740	4160	4159	2066	2065	-847	580	2093	2912
chr1	133138991	Ppp1r15b	NM_133819	2.72228	4778	4198	4197	2104	2103	-809	580	2093	2912
chr1	133139008	Ppp1r15b	NM_133819	2.72812	4795	4215	4214	2121	2120	-792	580	2093	2912
chr1	133139044	Ppp1r15b	NM_133819	2.74047	4831	4251	4250	2157	2156	-756	580	2093	2912
chr1	133139673	Ppp1r15b	NM_133819	2.9564	5460	4880	4879	2786	2785	-127	580	2093	2912
chr1	133139737	Ppp1r15b	NM_133819	2.97837	5524	4944	4943	2850	2849	-63	580	2093	2912
chr1	133382378	Sox13	NM_011439	2.94226	3452	3115	3114	1273	1272	-78	337	1841	1350
chr1	133382419	Sox13	NM_011439	2.91192	3411	3074	3073	1232	1231	-119	337	1841	1350
chr1	133620061	Zc3h11a	NM_001276767	2.88636	4277	3861	3860	1482	1481	-190	416	2378	1671
chr1	133656149	Zbed6	NM_001166552	2.65206	4736	3449	3448	506	505	-270	1287	2942	775
chr1	133704262	Atp2b4	NM_213616	2.60468	6512	6047	6046	2429	2428	-1588	465	3617	4016
chr1	134490498	Klhl12	NM_001311136	2.73498	2887	2747	2746	1040	1039	-375	140	1706	1414
chr1	134490549	Klhl12	NM_001311136	2.77102	2938	2798	2797	1091	1090	-324	140	1706	1414
chr1	134490645	Klhl12	NM_001311136	2.83887	3034	2894	2893	1187	1186	-228	140	1706	1414
chr1	134490676	Klhl12	NM_001311136	2.86078	3065	2925	2924	1218	1217	-197	140	1706	1414
chr1	134490713	Klhl12	NM_001311136	2.88693	3102	2962	2961	1255	1254	-160	140	1706	1414
chr1	134490826	Klhl12	NM_001311136	2.96678	3215	3075	3074	1368	1367	-47	140	1706	1414
chr1	134490840	Klhl12	NM_001311136	2.97668	3229	3089	3088	1382	1381	-33	140	1706	1414
chr1	134631587	Kdm5b	NM_152895	2.14162	5008	4848	4847	213	212	-1291	160	4634	1503
chr1	134631603	Kdm5b	NM_152895	2.15226	5024	4864	4863	229	228	-1275	160	4634	1503
chr1	134631643	Kdm5b	NM_152895	2.17886	5064	4904	4903	269	268	-1235	160	4634	1503
chr1	134631732	Kdm5b	NM_152895	2.23803	5153	4993	4992	358	357	-1146	160	4634	1503
chr1	134631842	Kdm5b	NM_152895	2.31117	5263	5103	5102	468	467	-1036	160	4634	1503
chr1	134631847	Kdm5b	NM_152895	2.31449	5268	5108	5107	473	472	-1031	160	4634	1503
chr1	134631866	Kdm5b	NM_152895	2.32713	5287	5127	5126	492	491	-1012	160	4634	1503
chr1	134631885	Kdm5b	NM_152895	2.33976	5306	5146	5145	511	510	-993	160	4634	1503
chr1	134631887	Kdm5b	NM_152895	2.34109	5308	5148	5147	513	512	-991	160	4634	1503
chr1	134631913	Kdm5b	NM_152895	2.35838	5334	5174	5173	539	538	-965	160	4634	1503
chr1	134632155	Kdm5b	NM_152895	2.51928	5576	5416	5415	781	780	-723	160	4634	1503
chr1	134973948	Ube2t	NM_026024	2.00858	901	617	616	2	1	-231	284	614	232
chr1	135156114	Arl8a	NM_026823	2.84554	1547	1404	1403	843	842	-154	143	560	996
chr1	135156118	Arl8a	NM_026823	2.84955	1551	1408	1407	847	846	-150	143	560	996
chr1	135156124	Arl8a	NM_026823	2.85557	1557	1414	1413	853	852	-144	143	560	996
chr1	135156145	Arl8a	NM_026823	2.87663	1578	1435	1434	874	873	-123	143	560	996
chr1	135156157	Arl8a	NM_026823	2.88867	1590	1447	1446	886	885	-111	143	560	996
chr1	135156165	Arl8a	NM_026823	2.89669	1598	1455	1454	894	893	-103	143	560	996
chr1	135156188	Arl8a	NM_026823	2.91976	1621	1478	1477	917	916	-80	143	560	996
chr1	136269342	Camsap2	NM_001347110	2.55167	6552	5886	5885	1500	1499	-1219	666	4385	2718
chr1	136270364	Camsap2	NM_001347110	2.1758	5530	4864	4863	478	477	-2241	666	4385	2718
chr1	136628129	Zfp281	NM_177643	2.06683	3008	2844	2843	162	161	-2262	164	2681	2423
chr1	136628136	Zfp281	NM_177643	2.06972	3015	2851	2850	169	168	-2255	164	2681	2423
chr1	136628243	Zfp281	NM_177643	2.11386	3122	2958	2957	276	275	-2148	164	2681	2423
chr1	136628452	Zfp281	NM_177643	2.20008	3331	3167	3166	485	484	-1939	164	2681	2423
chr1	136629675	Zfp281	NM_177643	2.70462	4554	4390	4389	1708	1707	-716	164	2681	2423
chr1	136630001	Zfp281	NM_177643	2.83911	4880	4716	4715	2034	2033	-390	164	2681	2423
chr1	138486559	Nek7	NM_021605	2.13942	1581	1350	1349	441	440	-2722	231	908	3162
chr1	138486726	Nek7	NM_021605	2.08663	1414	1183	1182	274	273	-2889	231	908	3162
chr1	143607929	Cdc73	NM_145991	2.11287	2456	2188	2187	592	591	-4653	268	1595	5244
chr1	143607942	Cdc73	NM_145991	2.11039	2443	2175	2174	579	578	-4666	268	1595	5244
chr1	143608193	Cdc73	NM_145991	2.06254	2192	1924	1923	328	327	-4917	268	1595	5244
chr1	150449866	Prg4	NM_001110146	2.20629	1429	1390	1389	118	117	-454	39	1271	571
chr1	150449891	Prg4	NM_001110146	2.16259	1404	1365	1364	93	92	-479	39	1271	571
chr1	150449891	Tpr	NM_133780	2.7027	7505	7400	7399	104	103	-44	105	7295	147
chr1	151363525	Ivns1abp	NM_054102	2.14815	2592	2089	2088	160	159	-920	503	1928	1079
chr1	151363555	Ivns1abp	NM_054102	2.17593	2622	2119	2118	190	189	-890	503	1928	1079
chr1	151363582	Ivns1abp	NM_054102	2.20093	2649	2146	2145	217	216	-863	503	1928	1079
chr1	151363592	Ivns1abp	NM_054102	2.21019	2659	2156	2155	227	226	-853	503	1928	1079
chr1	151367782	Swt1	NM_025819	2.89079	3584	3401	3400	677	676	-83	183	2723	759
chr1	151368360	Swt1	NM_025819	2.13026	3006	2823	2822	99	98	-661	183	2723	759
chr1	151470223	Rnf2	NM_011277	2.56986	2378	2104	2103	1093	1092	-825	274	1010	1917
chr1	151470232	Rnf2	NM_011277	2.56517	2369	2095	2094	1084	1083	-834	274	1010	1917
chr1	151470417	Rnf2	NM_011277	2.46872	2184	1910	1909	899	898	-1019	274	1010	1917
chr1	151470428	Rnf2	NM_011277	2.46298	2173	1899	1898	888	887	-1030	274	1010	1917
chr1	151470837	Rnf2	NM_011277	2.24974	1764	1490	1489	479	478	-1439	274	1010	1917
chr1	152774537	Arpc5	NM_026369	2.17091	853	671	670	215	214	-1043	182	455	1257
chr1	152775525	Arpc5	NM_026369	2.95628	1841	1659	1658	1203	1202	-55	182	455	1257
chr1	152837219	Smg7	NM_001005507	2.90162	5566	5458	5457	2053	2052	-224	108	3404	2276
chr1	152837378	Smg7	NM_001005507	2.8318	5407	5299	5298	1894	1893	-383	108	3404	2276
chr1	152837384	Smg7	NM_001005507	2.82916	5401	5293	5292	1888	1887	-389	108	3404	2276
chr1	152837509	Smg7	NM_001005507	2.77426	5276	5168	5167	1763	1762	-514	108	3404	2276
chr1	152837513	Smg7	NM_001005507	2.77251	5272	5164	5163	1759	1758	-518	108	3404	2276
chr1	152838361	Smg7	NM_001005507	2.40009	4424	4316	4315	911	910	-1366	108	3404	2276
chr1	153452492	Shcbp1l	NM_001033162	2.25455	1962	1948	1947	28	27	-82	14	1919	109
chr1	153452499	Shcbp1l	NM_001033162	2.31818	1969	1955	1954	35	34	-75	14	1919	109
chr1	153452549	Shcbp1l	NM_001033162	2.77273	2019	2005	2004	85	84	-25	14	1919	109
chr1	153455791	Dhx9	NM_007842	2.89389	4579	4430	4429	278	277	-33	149	4151	310
chr1	153908291	Glul	NM_008131	2.07073	1374	1231	1230	109	108	-1432	143	1121	1540
chr1	153908472	Glul	NM_008131	2.18819	1555	1412	1411	290	289	-1251	143	1121	1540
chr1	153908568	Glul	NM_008131	2.25049	1651	1508	1507	386	385	-1155	143	1121	1540
chr1	153908791	Glul	NM_008131	2.3952	1874	1731	1730	609	608	-932	143	1121	1540
chr1	153908793	Glul	NM_008131	2.3965	1876	1733	1732	611	610	-930	143	1121	1540
chr1	153908798	Glul	NM_008131	2.39974	1881	1738	1737	616	615	-925	143	1121	1540
chr1	153908805	Glul	NM_008131	2.40428	1888	1745	1744	623	622	-918	143	1121	1540
chr1	153908819	Glul	NM_008131	2.41337	1902	1759	1758	637	636	-904	143	1121	1540
chr1	153908821	Glul	NM_008131	2.41467	1904	1761	1760	639	638	-902	143	1121	1540
chr1	153908827	Glul	NM_008131	2.41856	1910	1767	1766	645	644	-896	143	1121	1540
chr1	153908829	Glul	NM_008131	2.41986	1912	1769	1768	647	646	-894	143	1121	1540
chr1	153908969	Glul	NM_008131	2.51071	2052	1909	1908	787	786	-754	143	1121	1540
chr1	153909185	Glul	NM_008131	2.65088	2268	2125	2124	1003	1002	-538	143	1121	1540
chr1	153909195	Glul	NM_008131	2.65737	2278	2135	2134	1013	1012	-528	143	1121	1540
chr1	153909198	Glul	NM_008131	2.65931	2281	2138	2137	1016	1015	-525	143	1121	1540
chr1	153909201	Glul	NM_008131	2.66126	2284	2141	2140	1019	1018	-522	143	1121	1540
chr1	153909250	Glul	NM_008131	2.69306	2333	2190	2189	1068	1067	-473	143	1121	1540
chr1	153909253	Glul	NM_008131	2.695	2336	2193	2192	1071	1070	-470	143	1121	1540
chr1	153909319	Glul	NM_008131	2.73783	2402	2259	2258	1137	1136	-404	143	1121	1540
chr1	153909324	Glul	NM_008131	2.74108	2407	2264	2263	1142	1141	-399	143	1121	1540
chr1	153909519	Glul	NM_008131	2.86762	2602	2459	2458	1337	1336	-204	143	1121	1540
chr1	153909680	Glul	NM_008131	2.9721	2763	2620	2619	1498	1497	-43	143	1121	1540
chr1	153909683	Glul	NM_008131	2.97404	2766	2623	2622	1501	1500	-40	143	1121	1540
chr1	155203437	Stx6	NM_021433	2.9467	2378	2189	2188	1421	1420	-80	189	767	1500
chr1	155203442	Stx6	NM_021433	2.95003	2383	2194	2193	1426	1425	-75	189	767	1500
chr1	156052314	Tor1aip2	NM_001160180	2.02802	1274	437	436	41	40	-1422	837	395	1462
chr1	156052382	Tor1aip2	NM_001160180	2.0745	1342	505	504	109	108	-1354	837	395	1462
chr1	156052447	Tor1aip2	NM_001160180	2.11893	1407	570	569	174	173	-1289	837	395	1462
chr1	156052491	Tor1aip2	NM_001160180	2.14901	1451	614	613	218	217	-1245	837	395	1462
chr1	156255429	Tdrd5	NM_001134741	2.52158	3309	3268	3267	145	144	-133	41	3122	277
chr1	156430434	Soat1	NM_009230	2.21179	2458	2248	2247	625	624	-2326	210	1622	2950
chr1	156649423	Abl2	NM_009595	2.97161	10517	10256	10255	6707	6706	-196	261	3548	6902
chr1	156649448	Abl2	NM_009595	2.97523	10542	10281	10280	6732	6731	-171	261	3548	6902
chr1	156678590	Fam20b	NM_145413	2.99331	4218	4051	4050	2821	2820	-19	167	1229	2839
chr1	156678701	Fam20b	NM_145413	2.95423	4107	3940	3939	2710	2709	-130	167	1229	2839
chr1	156808188	Ralgps2	NM_001159967	2.19528	2891	2671	2670	976	975	-4022	220	1694	4997
chr1	156808219	Ralgps2	NM_001159967	2.18908	2860	2640	2639	945	944	-4053	220	1694	4997
chr1	156808235	Ralgps2	NM_001159967	2.18587	2844	2624	2623	929	928	-4069	220	1694	4997
chr1	160199770	Mrps14	NM_001347121	2.10152	715	529	528	160	159	-1416	186	368	1575
chr1	160203080	Cacybp	NM_009786	2.40583	1401	1177	1176	487	486	-713	224	689	1199
chr1	160203215	Cacybp	NM_009786	2.29333	1266	1042	1041	352	351	-848	224	689	1199
chr1	160203227	Cacybp	NM_009786	2.28333	1254	1030	1029	340	339	-860	224	689	1199
chr1	160203342	Cacybp	NM_009786	2.1875	1139	915	914	225	224	-975	224	689	1199
chr1	160203362	Cacybp	NM_009786	2.17083	1119	895	894	205	204	-995	224	689	1199
chr1	160203366	Cacybp	NM_009786	2.1675	1115	891	890	201	200	-999	224	689	1199
chr1	160203368	Cacybp	NM_009786	2.16583	1113	889	888	199	198	-1001	224	689	1199
chr1	160203467	Cacybp	NM_009786	2.08333	1014	790	789	100	99	-1100	224	689	1199
chr1	160203485	Cacybp	NM_009786	2.06833	996	772	771	82	81	-1118	224	689	1199
chr1	160203489	Cacybp	NM_009786	2.065	992	768	767	78	77	-1122	224	689	1199
chr1	160203515	Cacybp	NM_009786	2.04333	966	742	741	52	51	-1148	224	689	1199
chr1	160967962	Rc3h1	NM_001024952	2.02298	3996	3558	3557	165	164	-7014	438	3392	7178
chr1	161019063	Zbtb37	NM_173424	2.3963	2672	2373	2372	858	857	-1307	299	1514	2164
chr1	161170250	Ankrd45	NM_028664	2.90883	3465	3411	3410	2562	2561	-257	54	848	2818
chr1	161817201	Suco	NM_172645	2.51686	5239	4930	4929	1165	1164	-1089	309	3764	2253
chr1	162597765	Vamp4	NM_001356527	2.70817	3935	3617	3616	3191	3190	-1315	318	425	4505
chr1	165592271	Mpzl1	NM_001001880	2.93886	2159	2012	2011	1382	1381	-90	147	629	1471
chr1	165592289	Mpzl1	NM_001001880	2.92663	2141	1994	1993	1364	1363	-108	147	629	1471
chr1	165592299	Mpzl1	NM_001001880	2.91984	2131	1984	1983	1354	1353	-118	147	629	1471
chr1	165592311	Mpzl1	NM_001001880	2.91168	2119	1972	1971	1342	1341	-130	147	629	1471
chr1	165593130	Mpzl1	NM_001001880	2.3553	1300	1153	1152	523	522	-949	147	629	1471
chr1	165593134	Mpzl1	NM_001001880	2.35258	1296	1149	1148	519	518	-953	147	629	1471
chr1	165593317	Mpzl1	NM_001001880	2.22826	1113	966	965	336	335	-1136	147	629	1471
chr1	165866109	Pou2f1	NM_198933	2.90977	12022	11906	11905	9629	9628	-955	116	2276	10583
chr1	165866195	Pou2f1	NM_198933	2.90164	11936	11820	11819	9543	9542	-1041	116	2276	10583
chr1	165870485	Pou2f1	NM_198933	2.49632	7646	7530	7529	5253	5252	-5331	116	2276	10583
chr1	165872863	Pou2f1	NM_198933	2.27164	5268	5152	5151	2875	2874	-7709	116	2276	10583
chr1	165875265	Pou2f1	NM_198933	2.04469	2866	2750	2749	473	472	-10111	116	2276	10583
chr1	167330573	Tmco1	NM_001039483	2.08295	1068	875	874	308	307	-3405	193	566	3712
chr1	167330639	Tmco1	NM_001039483	2.10073	1134	941	940	374	373	-3339	193	566	3712
chr1	167330700	Tmco1	NM_001039483	2.11716	1195	1002	1001	435	434	-3278	193	566	3712
chr1	169950331	Hsd17b7	NM_010476	2.77288	3779	3707	3706	2702	2701	-794	72	1004	3495
chr1	171129254	Sdhc	NM_025321	2.84938	1081	1057	1056	547	546	-97	24	509	643
chr1	171129261	Sdhc	NM_025321	2.83851	1074	1050	1049	540	539	-104	24	509	643
chr1	171129272	Sdhc	NM_025321	2.82143	1063	1039	1038	529	528	-115	24	509	643
chr1	171129747	Sdhc	NM_025321	2.08385	588	564	563	54	53	-590	24	509	643
chr1	171129759	Sdhc	NM_025321	2.06522	576	552	551	42	41	-602	24	509	643
chr1	171358093	Pfdn2	NM_011070	2.05456	568	532	531	67	66	-1161	36	464	1227
chr1	171463326	F11r	NM_172647	2.15477	1214	1135	1134	232	231	-1267	79	902	1498
chr1	171463916	F11r	NM_172647	2.54837	1804	1725	1724	822	821	-677	79	902	1498
chr1	171463970	F11r	NM_172647	2.58439	1858	1779	1778	876	875	-623	79	902	1498
chr1	172066050	Ncstn	NM_021607	2.94402	2817	2751	2750	624	623	-37	66	2126	660
chr1	172122256	Copa	NM_009938	2.86736	4552	4172	4171	497	496	-76	380	3674	572
chr1	172122264	Copa	NM_009938	2.88133	4560	4180	4179	505	504	-68	380	3674	572
chr1	172122284	Copa	NM_009938	2.91623	4580	4200	4199	525	524	-48	380	3674	572
chr1	172195082	Dcaf8	NM_001357204	2.23823	2601	2186	2185	410	409	-1311	415	1775	1720
chr1	172195366	Dcaf8	NM_001357204	2.40325	2885	2470	2469	694	693	-1027	415	1775	1720
chr1	172195381	Dcaf8	NM_001357204	2.41197	2900	2485	2484	709	708	-1012	415	1775	1720
chr1	172195415	Dcaf8	NM_001357204	2.43173	2934	2519	2518	743	742	-978	415	1775	1720
chr1	172195430	Dcaf8	NM_001357204	2.44044	2949	2534	2533	758	757	-963	415	1775	1720
chr1	172195458	Dcaf8	NM_001357204	2.45671	2977	2562	2561	786	785	-935	415	1775	1720
chr1	172319750	Igsf8	NM_080419	2.66182	2186	2018	2017	182	181	-93	168	1835	274
chr1	172319770	Igsf8	NM_080419	2.73455	2206	2038	2037	202	201	-73	168	1835	274
chr1	172319785	Igsf8	NM_080419	2.78909	2221	2053	2052	217	216	-58	168	1835	274
chr1	175684562	Chml	NM_021350	2.45318	3792	3792	3791	1926	1925	-2324	0	1865	4249
chr1	176733730	Cep170	NM_001099637	2.96201	6852	6687	6686	1950	1949	-77	165	4736	2026
chr1	176734736	Cep170	NM_001099637	2.46571	5846	5681	5680	944	943	-1083	165	4736	2026
chr1	177024397	Akt3	NM_011785	2.18287	2452	2407	2406	967	966	-4321	45	1439	5287
chr1	177024427	Akt3	NM_011785	2.17719	2422	2377	2376	937	936	-4351	45	1439	5287
chr1	177449479	Zbtb18	NM_001355103	2.55126	2448	2292	2291	1581	1580	-1287	156	710	2867
chr1	177450434	Zbtb18	NM_001355103	2.88424	3403	3247	3246	2536	2535	-332	156	710	2867
chr1	177763874	Adss	NM_007422	2.3477	1856	1742	1741	371	370	-696	114	1370	1066
chr1	177763935	Adss	NM_007422	2.29053	1795	1681	1680	310	309	-757	114	1370	1066
chr1	178250503	Desi2	NM_024282	2.33078	2118	1620	1619	1035	1034	-2094	498	584	3128
chr1	178329068	Hnrnpu	NM_016805	2.10916	2932	2689	2688	286	285	-2334	243	2402	2619
chr1	178329109	Hnrnpu	NM_016805	2.09351	2891	2648	2647	245	244	-2375	243	2402	2619
chr1	178329169	Hnrnpu	NM_016805	2.07061	2831	2588	2587	185	184	-2435	243	2402	2619
chr1	178329272	Hnrnpu	NM_016805	2.0313	2728	2485	2484	82	81	-2538	243	2402	2619
chr1	178957017	Smyd3	NM_027188	2.08071	1820	1731	1730	444	443	-5057	89	1286	5500
chr1	179746148	Ahctf1	NM_026375	2.12946	7586	6917	6916	185	184	-1244	669	6731	1428
chr1	179746184	Ahctf1	NM_026375	2.10427	7550	6881	6880	149	148	-1280	669	6731	1428
chr1	180162473	Cdc42bpa	NM_001346804	2.08932	5816	5467	5466	307	306	-3130	349	5159	3436
chr1	180600669	Parp1	NM_007415	2.29487	3325	3183	3182	138	137	-330	142	3044	467
chr1	180600671	Parp1	NM_007415	2.29915	3327	3185	3184	140	139	-328	142	3044	467
chr1	180600684	Parp1	NM_007415	2.32692	3340	3198	3197	153	152	-315	142	3044	467
chr1	180600698	Parp1	NM_007415	2.35684	3354	3212	3211	167	166	-301	142	3044	467
chr1	180600740	Parp1	NM_007415	2.44658	3396	3254	3253	209	208	-259	142	3044	467
chr1	180600747	Parp1	NM_007415	2.46154	3403	3261	3260	216	215	-252	142	3044	467
chr1	180600798	Parp1	NM_007415	2.57051	3454	3312	3311	267	266	-201	142	3044	467
chr1	180600811	Parp1	NM_007415	2.59829	3467	3325	3324	280	279	-188	142	3044	467
chr1	180600816	Parp1	NM_007415	2.60897	3472	3330	3329	285	284	-183	142	3044	467
chr1	180600851	Parp1	NM_007415	2.68376	3507	3365	3364	320	319	-148	142	3044	467
chr1	180600860	Parp1	NM_007415	2.70299	3516	3374	3373	329	328	-139	142	3044	467
chr1	180600876	Parp1	NM_007415	2.73718	3532	3390	3389	345	344	-123	142	3044	467
chr1	180600917	Parp1	NM_007415	2.82479	3573	3431	3430	386	385	-82	142	3044	467
chr1	180600927	Parp1	NM_007415	2.84615	3583	3441	3440	396	395	-72	142	3044	467
chr1	180600939	Parp1	NM_007415	2.87179	3595	3453	3452	408	407	-60	142	3044	467
chr1	180600956	Parp1	NM_007415	2.90812	3612	3470	3469	425	424	-43	142	3044	467
chr1	180600963	Parp1	NM_007415	2.92308	3619	3477	3476	432	431	-36	142	3044	467
chr1	180600967	Parp1	NM_007415	2.93162	3623	3481	3480	436	435	-32	142	3044	467
chr1	180600987	Parp1	NM_007415	2.97436	3643	3501	3500	456	455	-12	142	3044	467
chr1	180690612	Lin9	NM_001103182	2.94292	3084	2916	2915	1239	1238	-75	168	1676	1313
chr1	180752485	Acbd3	NM_133225	2.0627	1751	1693	1692	115	114	-1719	58	1577	1833
chr1	180752487	Acbd3	NM_133225	2.06379	1753	1695	1694	117	116	-1717	58	1577	1833
chr1	180752900	Acbd3	NM_133225	2.28899	2166	2108	2107	530	529	-1304	58	1577	1833
chr1	180753702	Acbd3	NM_133225	2.72628	2968	2910	2909	1332	1331	-502	58	1577	1833
chr1	180753707	Acbd3	NM_133225	2.72901	2973	2915	2914	1337	1336	-497	58	1577	1833
chr1	180753792	Acbd3	NM_133225	2.77535	3058	3000	2999	1422	1421	-412	58	1577	1833
chr1	180754068	Acbd3	NM_133225	2.92585	3334	3276	3275	1698	1697	-136	58	1577	1833
chr1	180802753	H3f3a	NM_008210	2.62669	892	735	734	324	323	-193	157	410	516
chr1	180866485	Sde2	NM_145943	2.10544	1560	1539	1538	192	191	-1629	21	1346	1820
chr1	180866872	Sde2	NM_145943	2.31796	1947	1926	1925	579	578	-1242	21	1346	1820
chr1	180866918	Sde2	NM_145943	2.34322	1993	1972	1971	625	624	-1196	21	1346	1820
chr1	180867082	Sde2	NM_145943	2.43328	2157	2136	2135	789	788	-1032	21	1346	1820
chr1	181092922	Nvl	NM_026171	2.14018	3607	3511	3510	943	942	-5784	96	2567	6726
chr1	181173506	Wdr26	NM_145514	2.93886	6766	6226	6225	4300	4299	-280	540	1925	4579
chr1	181177193	Wdr26	NM_145514	2.13384	3079	2539	2538	613	612	-3967	540	1925	4579
chr1	181177511	Wdr26	NM_145514	2.06441	2761	2221	2220	295	294	-4285	540	1925	4579
chr1	181815346	Lbr	NM_133815	2.97991	3520	3393	3392	1512	1511	-31	127	1880	1542
chr1	181815378	Lbr	NM_133815	2.95917	3488	3361	3360	1480	1479	-63	127	1880	1542
chr1	181815388	Lbr	NM_133815	2.95269	3478	3351	3350	1470	1469	-73	127	1880	1542
chr1	181815398	Lbr	NM_133815	2.94621	3468	3341	3340	1460	1459	-83	127	1880	1542
chr1	181815483	Lbr	NM_133815	2.89112	3383	3256	3255	1375	1374	-168	127	1880	1542
chr1	181815696	Lbr	NM_133815	2.75308	3170	3043	3042	1162	1161	-381	127	1880	1542
chr1	181815761	Lbr	NM_133815	2.71095	3105	2978	2977	1097	1096	-446	127	1880	1542
chr1	181815765	Lbr	NM_133815	2.70836	3101	2974	2973	1093	1092	-450	127	1880	1542
chr1	181815815	Lbr	NM_133815	2.67596	3051	2924	2923	1043	1042	-500	127	1880	1542
chr1	181815849	Lbr	NM_133815	2.65392	3017	2890	2889	1009	1008	-534	127	1880	1542
chr1	181815872	Lbr	NM_133815	2.63901	2994	2867	2866	986	985	-557	127	1880	1542
chr1	181815929	Lbr	NM_133815	2.60207	2937	2810	2809	929	928	-614	127	1880	1542
chr1	181815934	Lbr	NM_133815	2.59883	2932	2805	2804	924	923	-619	127	1880	1542
chr1	181815953	Lbr	NM_133815	2.58652	2913	2786	2785	905	904	-638	127	1880	1542
chr1	181815967	Lbr	NM_133815	2.57745	2899	2772	2771	891	890	-652	127	1880	1542
chr1	181815979	Lbr	NM_133815	2.56967	2887	2760	2759	879	878	-664	127	1880	1542
chr1	181815989	Lbr	NM_133815	2.56319	2877	2750	2749	869	868	-674	127	1880	1542
chr1	181815996	Lbr	NM_133815	2.55865	2870	2743	2742	862	861	-681	127	1880	1542
chr1	181816001	Lbr	NM_133815	2.55541	2865	2738	2737	857	856	-686	127	1880	1542
chr1	181816012	Lbr	NM_133815	2.54828	2854	2727	2726	846	845	-697	127	1880	1542
chr1	181816026	Lbr	NM_133815	2.53921	2840	2713	2712	832	831	-711	127	1880	1542
chr1	181816085	Lbr	NM_133815	2.50097	2781	2654	2653	773	772	-770	127	1880	1542
chr1	181816123	Lbr	NM_133815	2.47634	2743	2616	2615	735	734	-808	127	1880	1542
chr1	181816127	Lbr	NM_133815	2.47375	2739	2612	2611	731	730	-812	127	1880	1542
chr1	181816171	Lbr	NM_133815	2.44524	2695	2568	2567	687	686	-856	127	1880	1542
chr1	181816190	Lbr	NM_133815	2.43292	2676	2549	2548	668	667	-875	127	1880	1542
chr1	181816207	Lbr	NM_133815	2.42191	2659	2532	2531	651	650	-892	127	1880	1542
chr1	181816256	Lbr	NM_133815	2.39015	2610	2483	2482	602	601	-941	127	1880	1542
chr1	181816524	Lbr	NM_133815	2.21646	2342	2215	2214	334	333	-1209	127	1880	1542
chr1	181816547	Lbr	NM_133815	2.20156	2319	2192	2191	311	310	-1232	127	1880	1542
chr1	181816562	Lbr	NM_133815	2.19183	2304	2177	2176	296	295	-1247	127	1880	1542
chr1	181816598	Lbr	NM_133815	2.1685	2268	2141	2140	260	259	-1283	127	1880	1542
chr1	181816703	Lbr	NM_133815	2.10045	2163	2036	2035	155	154	-1388	127	1880	1542
chr1	181903727	Enah	NM_001083121	2.22514	4204	3759	3758	2133	2132	-7341	445	1625	9473
chr1	181904002	Enah	NM_001083121	2.19612	3929	3484	3483	1858	1857	-7616	445	1625	9473
chr1	181904326	Enah	NM_001083121	2.16192	3605	3160	3159	1534	1533	-7940	445	1625	9473
chr1	181905192	Enah	NM_001083121	2.07051	2739	2294	2293	668	667	-8806	445	1625	9473
chr1	181905246	Enah	NM_001083121	2.06481	2685	2240	2239	614	613	-8860	445	1625	9473
chr1	181905430	Enah	NM_001083121	2.04539	2501	2056	2055	430	429	-9044	445	1625	9473
chr1	182131460	Srp9	NM_012058	2.00521	432	266	265	5	4	-955	166	260	959
chr1	182132217	Srp9	NM_012058	2.79375	1189	1023	1022	762	761	-198	166	260	959
chr1	182132301	Srp9	NM_012058	2.88125	1273	1107	1106	846	845	-114	166	260	959
chr1	182132336	Srp9	NM_012058	2.91771	1308	1142	1141	881	880	-79	166	260	959
chr1	182132346	Srp9	NM_012058	2.92813	1318	1152	1151	891	890	-69	166	260	959
chr1	182132354	Srp9	NM_012058	2.93646	1326	1160	1159	899	898	-61	166	260	959
chr1	182315219	Fbxo28	NM_175127	2.44128	2795	2779	2778	1672	1671	-2117	16	1106	3788
chr1	182316431	Fbxo28	NM_175127	2.1214	1583	1567	1566	460	459	-3329	16	1106	3788
chr1	182316436	Fbxo28	NM_175127	2.12008	1578	1562	1561	455	454	-3334	16	1106	3788
chr1	182316544	Fbxo28	NM_175127	2.09158	1470	1454	1453	347	346	-3442	16	1106	3788
chr1	182316625	Fbxo28	NM_175127	2.0702	1389	1373	1372	266	265	-3523	16	1106	3788
chr1	182462292	Trp53bp2	NM_173378	2.79661	4225	3969	3968	564	563	-144	256	3404	707
chr1	184898282	Mark1	NM_145515	2.11524	2706	2630	2629	242	241	-1858	76	2387	2099
chr1	184898293	Mark1	NM_145515	2.11	2695	2619	2618	231	230	-1869	76	2387	2099
chr1	184898386	Mark1	NM_145515	2.06571	2602	2526	2525	138	137	-1962	76	2387	2099
chr1	189642020	Cenpf	NM_001081363	2.29169	9715	9573	9572	579	578	-1406	142	8993	1984
chr1	189642064	Cenpf	NM_001081363	2.26952	9671	9529	9528	535	534	-1450	142	8993	1984
chr1	189642096	Cenpf	NM_001081363	2.2534	9639	9497	9496	503	502	-1482	142	8993	1984
chr1	189642178	Cenpf	NM_001081363	2.21209	9557	9415	9414	421	420	-1564	142	8993	1984
chr1	190946340	Angel2	NM_021421	2.89214	3078	2884	2883	1249	1248	-151	194	1634	1399
chr1	190946464	Angel2	NM_021421	2.98071	3202	3008	3007	1373	1372	-27	194	1634	1399
chr1	191621549	Ints7	NM_178632	2.03819	3207	2986	2985	85	84	-2141	221	2900	2225
chr1	191621606	Ints7	NM_178632	2.06379	3264	3043	3042	142	141	-2084	221	2900	2225
chr1	191621632	Ints7	NM_178632	2.07547	3290	3069	3068	168	167	-2058	221	2900	2225
chr1	191621638	Ints7	NM_178632	2.07817	3296	3075	3074	174	173	-2052	221	2900	2225
chr1	191621879	Ints7	NM_178632	2.18643	3537	3316	3315	415	414	-1811	221	2900	2225
chr1	191622234	Ints7	NM_178632	2.34591	3892	3671	3670	770	769	-1456	221	2900	2225
chr1	191622276	Ints7	NM_178632	2.36478	3934	3713	3712	812	811	-1414	221	2900	2225
chr1	191909974	Slc30a1	NM_009579	2.06271	1956	1731	1730	219	218	-3273	225	1511	3491
chr1	191910010	Slc30a1	NM_009579	2.07302	1992	1767	1766	255	254	-3237	225	1511	3491
chr1	191912441	Slc30a1	NM_009579	2.76919	4423	4198	4197	2686	2685	-806	225	1511	3491
chr1	191913111	Slc30a1	NM_009579	2.96105	5093	4868	4867	3356	3355	-136	225	1511	3491
chr1	191913157	Slc30a1	NM_009579	2.97423	5139	4914	4913	3402	3401	-90	225	1511	3491
chr1	192844519	Sertad4	NM_198247	2.98355	3314	2988	2987	1854	1853	-31	326	1133	1884
chr1	192844524	Sertad4	NM_198247	2.9809	3309	2983	2982	1849	1848	-36	326	1133	1884
chr1	192844644	Sertad4	NM_198247	2.91724	3189	2863	2862	1729	1728	-156	326	1133	1884
chr1	192845011	Sertad4	NM_198247	2.72255	2822	2496	2495	1362	1361	-523	326	1133	1884
chr1	192845021	Sertad4	NM_198247	2.71724	2812	2486	2485	1352	1351	-533	326	1133	1884
chr1	192845030	Sertad4	NM_198247	2.71247	2803	2477	2476	1343	1342	-542	326	1133	1884
chr1	192845080	Sertad4	NM_198247	2.68594	2753	2427	2426	1293	1292	-592	326	1133	1884
chr1	192845145	Sertad4	NM_198247	2.65146	2688	2362	2361	1228	1227	-657	326	1133	1884
chr1	192845152	Sertad4	NM_198247	2.64775	2681	2355	2354	1221	1220	-664	326	1133	1884
chr1	192845173	Sertad4	NM_198247	2.6366	2660	2334	2333	1200	1199	-685	326	1133	1884
chr1	192845179	Sertad4	NM_198247	2.63342	2654	2328	2327	1194	1193	-691	326	1133	1884
chr1	192845369	Sertad4	NM_198247	2.53263	2464	2138	2137	1004	1003	-881	326	1133	1884
chr1	192845433	Sertad4	NM_198247	2.49867	2400	2074	2073	940	939	-945	326	1133	1884
chr1	192846065	Sertad4	NM_198247	2.1634	1768	1442	1441	308	307	-1577	326	1133	1884
chr1	192846193	Sertad4	NM_198247	2.09549	1640	1314	1313	180	179	-1705	326	1133	1884
chr1	193169743	Irf6	NM_016851	2.09371	1831	1641	1640	237	236	-2292	190	1403	2528
chr10	7119133	Cnksr3	NM_172546	2.94209	3376	2823	2822	1155	1154	-71	553	1667	1225
chr10	7120167	Cnksr3	NM_172546	2.09869	2342	1789	1788	121	120	-1105	553	1667	1225
chr10	7624760	Lrp11	NM_172784	2.57649	2679	2428	2427	976	975	-717	251	1451	1692
chr10	7625005	Lrp11	NM_172784	2.7212	2924	2673	2672	1221	1220	-472	251	1451	1692
chr10	7821414	Ppil4	NM_026141	2.15515	1746	1690	1689	211	210	-1149	56	1478	1359
chr10	7821702	Ppil4	NM_026141	2.36691	2034	1978	1977	499	498	-861	56	1478	1359
chr10	7821710	Ppil4	NM_026141	2.37279	2042	1986	1985	507	506	-853	56	1478	1359
chr10	7821821	Ppil4	NM_026141	2.45441	2153	2097	2096	618	617	-742	56	1478	1359
chr10	7821973	Ppil4	NM_026141	2.56618	2305	2249	2248	770	769	-590	56	1478	1359
chr10	8722372	Sash1	NM_175155	2.95333	7029	6818	6817	3125	3124	-153	211	3692	3277
chr10	8724218	Sash1	NM_175155	2.39018	5183	4972	4971	1279	1278	-1999	211	3692	3277
chr10	8724747	Sash1	NM_175155	2.2288	4654	4443	4442	750	749	-2528	211	3692	3277
chr10	11214060	Shprh	NM_001077707	2.29844	5735	5541	5540	516	515	-1213	194	5024	1728
chr10	11296183	Fbxo30	NM_001168297	2.29933	3156	3004	3003	763	762	-1786	152	2240	2548
chr10	11296201	Fbxo30	NM_001168297	2.30639	3174	3022	3021	781	780	-1768	152	2240	2548
chr10	12383178	Utrn	NM_011682	2.505	11391	11303	11302	1010	1009	-990	88	10292	1999
chr10	13178691	Ltv1	NM_181470	2.78629	1714	1608	1607	195	194	-53	106	1412	247
chr10	13647450	Aig1	NM_001347362	2.35668	1134	936	935	219	218	-395	198	716	613
chr10	14149843	Hivep2	NM_001358783	2.06516	8521	7400	7399	107	106	-1535	1121	7292	1641
chr10	17725472	Cited2	NM_010828	2.7802	1766	1527	1526	717	716	-202	239	809	918
chr10	17900496	Heca	NM_001033432	2.98283	3636	3352	3351	1717	1716	-30	284	1634	1746
chr10	17900510	Heca	NM_001033432	2.97481	3622	3338	3337	1703	1702	-44	284	1634	1746
chr10	17900534	Heca	NM_001033432	2.96108	3598	3314	3313	1679	1678	-68	284	1634	1746
chr10	17900550	Heca	NM_001033432	2.95192	3582	3298	3297	1663	1662	-84	284	1634	1746
chr10	17901227	Heca	NM_001033432	2.5644	2905	2621	2620	986	985	-761	284	1634	1746
chr10	17901243	Heca	NM_001033432	2.55524	2889	2605	2604	970	969	-777	284	1634	1746
chr10	20142066	Map3k5	NM_008580	2.41538	4708	4629	4628	486	485	-684	79	4142	1169
chr10	20142077	Map3k5	NM_008580	2.42479	4719	4640	4639	497	496	-673	79	4142	1169
chr10	20142173	Map3k5	NM_008580	2.50684	4815	4736	4735	593	592	-577	79	4142	1169
chr10	20142186	Map3k5	NM_008580	2.51795	4828	4749	4748	606	605	-564	79	4142	1169
chr10	20142218	Map3k5	NM_008580	2.5453	4860	4781	4780	638	637	-532	79	4142	1169
chr10	20142244	Map3k5	NM_008580	2.56752	4886	4807	4806	664	663	-506	79	4142	1169
chr10	20340119	Bclaf1	NM_001025392	2.02537	3071	2822	2821	62	61	-2382	249	2759	2443
chr10	20340142	Bclaf1	NM_001025392	2.03478	3094	2845	2844	85	84	-2359	249	2759	2443
chr10	20340185	Bclaf1	NM_001025392	2.05237	3137	2888	2887	128	127	-2316	249	2759	2443
chr10	21079622	Ahi1	NM_026203	2.39911	4043	3680	3679	536	535	-807	363	3143	1342
chr10	21079628	Ahi1	NM_026203	2.40357	4049	3686	3685	542	541	-801	363	3143	1342
chr10	21079718	Ahi1	NM_026203	2.47059	4139	3776	3775	632	631	-711	363	3143	1342
chr10	21999611	Sgk1	NM_001161850	2.7293	2295	2122	2121	784	783	-291	173	1337	1074
chr10	21999618	Sgk1	NM_001161850	2.73581	2302	2129	2128	791	790	-284	173	1337	1074
chr10	21999669	Sgk1	NM_001161850	2.78326	2353	2180	2179	842	841	-233	173	1337	1074
chr10	22705412	Tbpl1	NM_011603	2.20835	1339	965	964	404	403	-1535	374	560	1938
chr10	22705418	Tbpl1	NM_011603	2.20526	1333	959	958	398	397	-1541	374	560	1938
chr10	22705597	Tbpl1	NM_011603	2.11294	1154	780	779	219	218	-1720	374	560	1938
chr10	22705635	Tbpl1	NM_011603	2.09335	1116	742	741	181	180	-1758	374	560	1938
chr10	24187798	Stx7	NM_016797	2.06285	1338	864	863	78	77	-1163	474	785	1240
chr10	24187945	Stx7	NM_016797	2.18131	1485	1011	1010	225	224	-1016	474	785	1240
chr10	24188125	Stx7	NM_016797	2.32635	1665	1191	1190	405	404	-836	474	785	1240
chr10	24188191	Stx7	NM_016797	2.37953	1731	1257	1256	471	470	-770	474	785	1240
chr10	24188226	Stx7	NM_016797	2.40774	1766	1292	1291	506	505	-735	474	785	1240
chr10	24188253	Stx7	NM_016797	2.42949	1793	1319	1318	533	532	-708	474	785	1240
chr10	24188255	Stx7	NM_016797	2.4311	1795	1321	1320	535	534	-706	474	785	1240
chr10	24912965	Med23	NM_027347	2.19658	4363	4251	4250	138	137	-564	112	4112	701
chr10	24912990	Med23	NM_027347	2.23219	4388	4276	4275	163	162	-539	112	4112	701
chr10	24912999	Med23	NM_027347	2.24501	4397	4285	4284	172	171	-530	112	4112	701
chr10	25522582	Epb41l2	NM_001358751	2.23467	3241	3044	3043	287	286	-936	197	2756	1222
chr10	25522690	Epb41l2	NM_001358751	2.32298	3349	3152	3151	395	394	-828	197	2756	1222
chr10	25522730	Epb41l2	NM_001358751	2.35568	3389	3192	3191	435	434	-788	197	2756	1222
chr10	25523423	Epb41l2	NM_001358751	2.92232	4082	3885	3884	1128	1127	-95	197	2756	1222
chr10	25523490	Epb41l2	NM_001358751	2.97711	4149	3952	3951	1195	1194	-28	197	2756	1222
chr10	29345428	Echdc1	NM_025855	2.35513	1814	1648	1647	679	678	-1233	166	968	1911
chr10	29345428	Rnf146	NM_001110198	2.5245	3131	2461	2460	1381	1380	-1252	670	1079	2632
chr10	30534757	Trmt11	NM_028604	2.4009	1777	1739	1738	356	355	-532	38	1382	887
chr10	34283704	Tspyl1	NM_009433	2.19386	1514	1424	1423	284	283	-1181	90	1139	1464
chr10	34283777	Tspyl1	NM_009433	2.24369	1587	1497	1496	357	356	-1108	90	1139	1464
chr10	34284349	Tspyl1	NM_009433	2.63413	2159	2069	2068	929	928	-536	90	1139	1464
chr10	34284385	Tspyl1	NM_009433	2.6587	2195	2105	2104	965	964	-500	90	1139	1464
chr10	34284392	Tspyl1	NM_009433	2.66348	2202	2112	2111	972	971	-493	90	1139	1464
chr10	34284396	Tspyl1	NM_009433	2.66621	2206	2116	2115	976	975	-489	90	1139	1464
chr10	34284406	Tspyl1	NM_009433	2.67304	2216	2126	2125	986	985	-479	90	1139	1464
chr10	34284432	Tspyl1	NM_009433	2.69078	2242	2152	2151	1012	1011	-453	90	1139	1464
chr10	34284808	Tspyl1	NM_009433	2.94744	2618	2528	2527	1388	1387	-77	90	1139	1464
chr10	37001790	Hdac2	NM_008229	2.70213	1905	1698	1697	231	230	-98	207	1466	328
chr10	39150137	Tube1	NM_028006	2.36086	2007	1948	1947	520	519	-921	59	1427	1440
chr10	39564337	Fyn	NM_001122893	2.26034	2491	1979	1978	365	364	-1037	512	1613	1401
chr10	40832945	Cdc40	NM_027879	2.15029	2041	1974	1973	234	233	-1323	67	1739	1556
chr10	40937934	Wasf1	NM_031877	2.17102	1914	1811	1810	131	130	-635	103	1679	765
chr10	40938042	Wasf1	NM_031877	2.31201	2022	1919	1918	239	238	-527	103	1679	765
chr10	40938124	Wasf1	NM_031877	2.41906	2104	2001	2000	321	320	-445	103	1679	765
chr10	40938470	Wasf1	NM_031877	2.87076	2450	2347	2346	667	666	-99	103	1679	765
chr10	41529003	Cd164	NM_016898	2.0736	790	756	755	162	161	-2039	34	593	2200
chr10	41529012	Cd164	NM_016898	2.07769	799	765	764	171	170	-2030	34	593	2200
chr10	41529070	Cd164	NM_016898	2.10404	857	823	822	229	228	-1972	34	593	2200
chr10	41529097	Cd164	NM_016898	2.11631	884	850	849	256	255	-1945	34	593	2200
chr10	41529371	Cd164	NM_016898	2.2408	1158	1124	1123	530	529	-1671	34	593	2200
chr10	41529644	Cd164	NM_016898	2.36483	1431	1397	1396	803	802	-1398	34	593	2200
chr10	41529648	Cd164	NM_016898	2.36665	1435	1401	1400	807	806	-1394	34	593	2200
chr10	41529723	Cd164	NM_016898	2.40073	1510	1476	1475	882	881	-1319	34	593	2200
chr10	41529735	Cd164	NM_016898	2.40618	1522	1488	1487	894	893	-1307	34	593	2200
chr10	41529758	Cd164	NM_016898	2.41663	1545	1511	1510	917	916	-1284	34	593	2200
chr10	41529882	Cd164	NM_016898	2.47297	1669	1635	1634	1041	1040	-1160	34	593	2200
chr10	41529886	Cd164	NM_016898	2.47478	1673	1639	1638	1045	1044	-1156	34	593	2200
chr10	41530195	Cd164	NM_016898	2.61517	1982	1948	1947	1354	1353	-847	34	593	2200
chr10	41530212	Cd164	NM_016898	2.6229	1999	1965	1964	1371	1370	-830	34	593	2200
chr10	41530221	Cd164	NM_016898	2.62699	2008	1974	1973	1380	1379	-821	34	593	2200
chr10	41530231	Cd164	NM_016898	2.63153	2018	1984	1983	1390	1389	-811	34	593	2200
chr10	41530238	Cd164	NM_016898	2.63471	2025	1991	1990	1397	1396	-804	34	593	2200
chr10	41530265	Cd164	NM_016898	2.64698	2052	2018	2017	1424	1423	-777	34	593	2200
chr10	41530352	Cd164	NM_016898	2.68651	2139	2105	2104	1511	1510	-690	34	593	2200
chr10	41530384	Cd164	NM_016898	2.70104	2171	2137	2136	1543	1542	-658	34	593	2200
chr10	41530396	Cd164	NM_016898	2.7065	2183	2149	2148	1555	1554	-646	34	593	2200
chr10	41530402	Cd164	NM_016898	2.70922	2189	2155	2154	1561	1560	-640	34	593	2200
chr10	41530415	Cd164	NM_016898	2.71513	2202	2168	2167	1574	1573	-627	34	593	2200
chr10	41530423	Cd164	NM_016898	2.71876	2210	2176	2175	1582	1581	-619	34	593	2200
chr10	41530441	Cd164	NM_016898	2.72694	2228	2194	2193	1600	1599	-601	34	593	2200
chr10	41530443	Cd164	NM_016898	2.72785	2230	2196	2195	1602	1601	-599	34	593	2200
chr10	41530452	Cd164	NM_016898	2.73194	2239	2205	2204	1611	1610	-590	34	593	2200
chr10	41530454	Cd164	NM_016898	2.73285	2241	2207	2206	1613	1612	-588	34	593	2200
chr10	41530458	Cd164	NM_016898	2.73467	2245	2211	2210	1617	1616	-584	34	593	2200
chr10	41530463	Cd164	NM_016898	2.73694	2250	2216	2215	1622	1621	-579	34	593	2200
chr10	41530471	Cd164	NM_016898	2.74057	2258	2224	2223	1630	1629	-571	34	593	2200
chr10	41530478	Cd164	NM_016898	2.74375	2265	2231	2230	1637	1636	-564	34	593	2200
chr10	41530495	Cd164	NM_016898	2.75148	2282	2248	2247	1654	1653	-547	34	593	2200
chr10	41530512	Cd164	NM_016898	2.7592	2299	2265	2264	1671	1670	-530	34	593	2200
chr10	41530519	Cd164	NM_016898	2.76238	2306	2272	2271	1678	1677	-523	34	593	2200
chr10	41530535	Cd164	NM_016898	2.76965	2322	2288	2287	1694	1693	-507	34	593	2200
chr10	41530539	Cd164	NM_016898	2.77147	2326	2292	2291	1698	1697	-503	34	593	2200
chr10	41530567	Cd164	NM_016898	2.78419	2354	2320	2319	1726	1725	-475	34	593	2200
chr10	41530961	Cd164	NM_016898	2.9632	2748	2714	2713	2120	2119	-81	34	593	2200
chr10	41530966	Cd164	NM_016898	2.96547	2753	2719	2718	2125	2124	-76	34	593	2200
chr10	41530972	Cd164	NM_016898	2.9682	2759	2725	2724	2131	2130	-70	34	593	2200
chr10	41530976	Cd164	NM_016898	2.97001	2763	2729	2728	2135	2134	-66	34	593	2200
chr10	41530997	Cd164	NM_016898	2.97955	2784	2750	2749	2156	2155	-45	34	593	2200
chr10	41531015	Cd164	NM_016898	2.98773	2802	2768	2767	2174	2173	-27	34	593	2200
chr10	41531027	Cd164	NM_016898	2.99318	2814	2780	2779	2186	2185	-15	34	593	2200
chr10	42534896	Snx3	NM_017472	2.22586	903	627	626	138	137	-473	276	488	610
chr10	42535348	Snx3	NM_017472	2.96563	1355	1079	1078	590	589	-21	276	488	610
chr10	43583256	Cd24a	NM_009846	2.32733	806	722	721	491	490	-1009	84	230	1499
chr10	43951593	Crybg1	NM_172393	2.1767	6129	5352	5351	276	275	-1286	777	5075	1561
chr10	43951666	Crybg1	NM_172393	2.12996	6056	5279	5278	203	202	-1359	777	5075	1561
chr10	43951670	Crybg1	NM_172393	2.1274	6052	5275	5274	199	198	-1363	777	5075	1561
chr10	43951678	Crybg1	NM_172393	2.12228	6044	5267	5266	191	190	-1371	777	5075	1561
chr10	43951693	Crybg1	NM_172393	2.11268	6029	5252	5251	176	175	-1386	777	5075	1561
chr10	44363421	Atg5	NM_053069	2.29591	1500	1197	1196	369	368	-878	303	827	1246
chr10	44363976	Atg5	NM_053069	2.74098	2055	1752	1751	924	923	-323	303	827	1246
chr10	44364032	Atg5	NM_053069	2.78589	2111	1808	1807	980	979	-267	303	827	1246
chr10	45158906	Prep	NM_011156	2.08994	2627	2513	2512	380	379	-3845	114	2132	4224
chr10	45379840	Lin28b	NM_001031772	2.27553	2181	2041	2040	1225	1224	-3221	140	815	4445
chr10	50850949	Ascc3	NM_198007	2.58456	7223	6953	6952	356	355	-253	270	6596	608
chr10	52338424	Gopc	NM_053187	2.48129	2892	2667	2666	1299	1298	-1400	225	1367	2698
chr10	53607977	Asf1a	NM_025541	2.07474	943	715	714	100	99	-1238	228	614	1337
chr10	53608078	Asf1a	NM_025541	2.15022	1044	816	815	201	200	-1137	228	614	1337
chr10	53608089	Asf1a	NM_025541	2.15845	1055	827	826	212	211	-1126	228	614	1337
chr10	56116847	Msl3l2	NM_001163833	2.94349	2106	1667	1666	551	550	-33	439	1115	583
chr10	57512291	Hsf2	NM_008297	2.09841	1770	1647	1646	93	92	-852	123	1553	944
chr10	57512525	Hsf2	NM_008297	2.34603	2004	1881	1880	327	326	-618	123	1553	944
chr10	57512535	Hsf2	NM_008297	2.35661	2014	1891	1890	337	336	-608	123	1553	944
chr10	57512581	Hsf2	NM_008297	2.40529	2060	1937	1936	383	382	-562	123	1553	944
chr10	57512664	Hsf2	NM_008297	2.49312	2143	2020	2019	466	465	-479	123	1553	944
chr10	57512796	Hsf2	NM_008297	2.6328	2275	2152	2151	598	597	-347	123	1553	944
chr10	58494005	Ranbp2	NM_011240	2.19892	9326	9199	9198	37	36	-149	127	9161	185
chr10	58494025	Ranbp2	NM_011240	2.30645	9346	9219	9218	57	56	-129	127	9161	185
chr10	58494044	Ranbp2	NM_011240	2.4086	9365	9238	9237	76	75	-110	127	9161	185
chr10	58494048	Ranbp2	NM_011240	2.43011	9369	9242	9241	80	79	-106	127	9161	185
chr10	58494053	Ranbp2	NM_011240	2.45699	9374	9247	9246	85	84	-101	127	9161	185
chr10	58494069	Ranbp2	NM_011240	2.54301	9390	9263	9262	101	100	-85	127	9161	185
chr10	58494098	Ranbp2	NM_011240	2.69892	9419	9292	9291	130	129	-56	127	9161	185
chr10	58494114	Ranbp2	NM_011240	2.78495	9435	9308	9307	146	145	-40	127	9161	185
chr10	58576061	Ccdc138	NM_001162956	2.53077	2282	2250	2249	207	206	-183	32	2042	389
chr10	59949700	Ddit4	NM_029083	2.97096	1659	1526	1525	836	835	-25	133	689	860
chr10	59949728	Ddit4	NM_029083	2.93844	1631	1498	1497	808	807	-53	133	689	860
chr10	59949747	Ddit4	NM_029083	2.91638	1612	1479	1478	789	788	-72	133	689	860
chr10	59950005	Ddit4	NM_029083	2.61672	1354	1221	1220	531	530	-330	133	689	860
chr10	59950043	Ddit4	NM_029083	2.57259	1316	1183	1182	493	492	-368	133	689	860
chr10	59950055	Ddit4	NM_029083	2.55865	1304	1171	1170	481	480	-380	133	689	860
chr10	59950103	Ddit4	NM_029083	2.5029	1256	1123	1122	433	432	-428	133	689	860
chr10	60301813	Psap	NM_011179	2.09644	1872	1758	1757	84	83	-787	114	1673	870
chr10	60302079	Psap	NM_011179	2.40184	2138	2024	2023	350	349	-521	114	1673	870
chr10	60302091	Psap	NM_011179	2.41561	2150	2036	2035	362	361	-509	114	1673	870
chr10	60302242	Psap	NM_011179	2.58898	2301	2187	2186	513	512	-358	114	1673	870
chr10	60302328	Psap	NM_011179	2.68772	2387	2273	2272	599	598	-272	114	1673	870
chr10	60302370	Psap	NM_011179	2.73594	2429	2315	2314	641	640	-230	114	1673	870
chr10	61098705	Sgpl1	NM_009163	2.9717	4078	3870	3869	2163	2162	-63	208	1706	2225
chr10	61098775	Sgpl1	NM_009163	2.94025	4008	3800	3799	2093	2092	-133	208	1706	2225
chr10	61319691	Pald1	NM_013753	2.97627	4239	3979	3978	1399	1398	-34	260	2579	1432
chr10	61319704	Pald1	NM_013753	2.9672	4226	3966	3965	1386	1385	-47	260	2579	1432
chr10	61433627	Eif4ebp2	NM_010124	2.13077	655	533	532	170	169	-1130	122	362	1299
chr10	61673986	Ppa1	NM_026438	2.43175	1112	1006	1005	136	135	-179	106	869	314
chr10	61691728	Sar1a	NM_001358487	2.17247	1195	924	923	327	326	-1569	271	596	1895
chr10	61738701	H2afy2	NM_207000	2.91692	1855	1715	1714	596	595	-54	140	1118	649
chr10	61738721	H2afy2	NM_207000	2.88615	1835	1695	1694	576	575	-74	140	1118	649
chr10	61738793	H2afy2	NM_207000	2.77538	1763	1623	1622	504	503	-146	140	1118	649
chr10	62456225	Vps26a	NM_133672	2.2734	1648	1504	1503	520	519	-1382	144	983	1901
chr10	62456299	Vps26a	NM_133672	2.23449	1574	1430	1429	446	445	-1456	144	983	1901
chr10	62456347	Vps26a	NM_133672	2.20925	1526	1382	1381	398	397	-1504	144	983	1901
chr10	62456519	Vps26a	NM_133672	2.11882	1354	1210	1209	226	225	-1676	144	983	1901
chr10	62456577	Vps26a	NM_133672	2.08833	1296	1152	1151	168	167	-1734	144	983	1901
chr10	62456593	Vps26a	NM_133672	2.07992	1280	1136	1135	152	151	-1750	144	983	1901
chr10	62558763	Kif1bp	NM_028197	2.45539	2178	2099	2098	245	244	-293	79	1853	537
chr10	62580449	Ddx21	NM_019553	2.90395	4540	4457	4456	1901	1900	-202	83	2555	2102
chr10	62580870	Ddx21	NM_019553	2.70376	4119	4036	4035	1480	1479	-623	83	2555	2102
chr10	62616234	Ddx50	NM_001358819	2.00897	2425	2014	2013	4	3	-442	411	2009	445
chr10	62744628	Ccar1	NM_026201	2.16168	3777	3576	3575	135	134	-700	201	3440	834
chr10	62744646	Ccar1	NM_026201	2.14012	3759	3558	3557	117	116	-718	201	3440	834
chr10	62744695	Ccar1	NM_026201	2.08144	3710	3509	3508	68	67	-767	201	3440	834
chr10	63319129	Sirt1	NM_001159589	2.92397	3668	3604	3603	1507	1506	-124	64	2096	1630
chr10	63408693	Dnajc12	NM_013888	2.73609	1141	1007	1006	410	409	-147	134	596	556
chr10	67255934	Jmjd1c	NM_207221	2.50317	7990	7990	7989	397	396	-392	0	7592	788
chr10	67256238	Jmjd1c	NM_207221	2.88847	8294	8294	8293	701	700	-88	0	7592	788
chr10	67256290	Jmjd1c	NM_207221	2.95437	8346	8346	8345	753	752	-36	0	7592	788
chr10	67542134	Egr2	NM_010118	2.955	2910	2559	2558	1146	1145	-54	351	1412	1199
chr10	67547041	Ado	NM_001005419	2.27549	1914	1733	1732	962	961	-2530	181	770	3491
chr10	68042272	Rtkn2	NM_001359318	2.18233	2373	2170	2169	355	354	-1592	203	1814	1946
chr10	69291751	Rhobtb1	NM_001252637	2.98425	4392	4150	4149	2062	2061	-33	242	2087	2094
chr10	70190817	Ccdc6	NM_001111121	2.3924	3127	2949	2948	1539	1538	-2383	178	1409	3921
chr10	70192160	Ccdc6	NM_001111121	2.73483	4470	4292	4291	2882	2881	-1040	178	1409	3921
chr10	70192243	Ccdc6	NM_001111121	2.75599	4553	4375	4374	2965	2964	-957	178	1409	3921
chr10	70192250	Ccdc6	NM_001111121	2.75778	4560	4382	4381	2972	2971	-950	178	1409	3921
chr10	70192274	Ccdc6	NM_001111121	2.7639	4584	4406	4405	2996	2995	-926	178	1409	3921
chr10	70192313	Ccdc6	NM_001111121	2.77384	4623	4445	4444	3035	3034	-887	178	1409	3921
chr10	70192476	Ccdc6	NM_001111121	2.8154	4786	4608	4607	3198	3197	-724	178	1409	3921
chr10	70192484	Ccdc6	NM_001111121	2.81744	4794	4616	4615	3206	3205	-716	178	1409	3921
chr10	70192488	Ccdc6	NM_001111121	2.81846	4798	4620	4619	3210	3209	-712	178	1409	3921
chr10	70192494	Ccdc6	NM_001111121	2.81999	4804	4626	4625	3216	3215	-706	178	1409	3921
chr10	70192509	Ccdc6	NM_001111121	2.82381	4819	4641	4640	3231	3230	-691	178	1409	3921
chr10	70192518	Ccdc6	NM_001111121	2.82611	4828	4650	4649	3240	3239	-682	178	1409	3921
chr10	70192524	Ccdc6	NM_001111121	2.82764	4834	4656	4655	3246	3245	-676	178	1409	3921
chr10	70193089	Ccdc6	NM_001111121	2.9717	5399	5221	5220	3811	3810	-111	178	1409	3921
chr10	70193113	Ccdc6	NM_001111121	2.97782	5423	5245	5244	3835	3834	-87	178	1409	3921
chr10	70193131	Ccdc6	NM_001111121	2.98241	5441	5263	5262	3853	3852	-69	178	1409	3921
chr10	70923805	Bicc1	NM_031397	2.59627	4447	4374	4373	1440	1439	-975	73	2933	2414
chr10	71228042	Tfam	NM_009360	2.16775	1352	1249	1248	517	516	-2565	103	731	3081
chr10	71381993	Ipmk	NM_027184	2.04303	1554	1366	1365	175	174	-3892	188	1190	4066
chr10	72674061	Zwint	NM_001293683	2.0979	929	857	856	98	97	-903	72	758	1000
chr10	72674869	Zwint	NM_001293683	2.90509	1737	1665	1664	906	905	-95	72	758	1000
chr10	75183363	Bcr	NM_001081412	2.39861	4976	4847	4846	1034	1033	-1560	129	3812	2593
chr10	75311389	Specc1l	NM_001145826	2.59897	5279	4918	4917	1510	1509	-1011	361	3407	2520
chr10	75312297	Specc1l	NM_001145826	2.95914	6187	5826	5825	2418	2417	-103	361	3407	2520
chr10	75535434	Snrpd3	NM_026095	2.94915	597	493	492	112	111	-6	104	380	117
chr10	75859415	Mif	NM_010798	2.5	518	410	409	62	61	-62	108	347	123
chr10	76042753	Zfp280b	NM_177475	2.92978	4657	4465	4464	2860	2859	-216	192	1604	3075
chr10	77616310	Sumo3	NM_019929	2.02508	608	385	384	52	51	-2021	223	332	2072
chr10	77616413	Sumo3	NM_019929	2.07477	711	488	487	155	154	-1918	223	332	2072
chr10	77616448	Sumo3	NM_019929	2.09165	746	523	522	190	189	-1883	223	332	2072
chr10	77616454	Sumo3	NM_019929	2.09455	752	529	528	196	195	-1877	223	332	2072
chr10	77616459	Sumo3	NM_019929	2.09696	757	534	533	201	200	-1872	223	332	2072
chr10	77616486	Sumo3	NM_019929	2.10999	784	561	560	228	227	-1845	223	332	2072
chr10	77616558	Sumo3	NM_019929	2.14472	856	633	632	300	299	-1773	223	332	2072
chr10	77616667	Sumo3	NM_019929	2.1973	965	742	741	409	408	-1664	223	332	2072
chr10	77616978	Sumo3	NM_019929	2.34732	1276	1053	1052	720	719	-1353	223	332	2072
chr10	77616999	Sumo3	NM_019929	2.35745	1297	1074	1073	741	740	-1332	223	332	2072
chr10	77617011	Sumo3	NM_019929	2.36324	1309	1086	1085	753	752	-1320	223	332	2072
chr10	77617243	Sumo3	NM_019929	2.47516	1541	1318	1317	985	984	-1088	223	332	2072
chr10	77617346	Sumo3	NM_019929	2.52484	1644	1421	1420	1088	1087	-985	223	332	2072
chr10	77617353	Sumo3	NM_019929	2.52822	1651	1428	1427	1095	1094	-978	223	332	2072
chr10	77617364	Sumo3	NM_019929	2.53353	1662	1439	1438	1106	1105	-967	223	332	2072
chr10	77617371	Sumo3	NM_019929	2.5369	1669	1446	1445	1113	1112	-960	223	332	2072
chr10	77617379	Sumo3	NM_019929	2.54076	1677	1454	1453	1121	1120	-952	223	332	2072
chr10	77617384	Sumo3	NM_019929	2.54317	1682	1459	1458	1126	1125	-947	223	332	2072
chr10	77617387	Sumo3	NM_019929	2.54462	1685	1462	1461	1129	1128	-944	223	332	2072
chr10	79864024	Ptbp1	NM_001077363	2.64508	2696	2415	2414	747	746	-411	281	1667	1157
chr10	79864351	Ptbp1	NM_001077363	2.92746	3023	2742	2741	1074	1073	-84	281	1667	1157
chr10	80036008	Polr2e	NM_025554	2.84507	952	933	932	300	299	-55	19	632	354
chr10	80036014	Polr2e	NM_025554	2.82817	946	927	926	294	293	-61	19	632	354
chr10	80157950	Midn	NM_001305798	2.75782	3176	2703	2702	1308	1307	-418	473	1394	1725
chr10	80158343	Midn	NM_001305798	2.98552	3569	3096	3095	1701	1700	-25	473	1394	1725
chr10	80171036	Cirbp	NM_007705	2.05775	640	557	556	38	37	-620	83	518	657
chr10	80171062	Cirbp	NM_007705	2.09726	666	583	582	64	63	-594	83	518	657
chr10	80171082	Cirbp	NM_007705	2.12766	686	603	602	84	83	-574	83	518	657
chr10	80171090	Cirbp	NM_007705	2.13982	694	611	610	92	91	-566	83	518	657
chr10	80171101	Cirbp	NM_007705	2.15653	705	622	621	103	102	-555	83	518	657
chr10	80171106	Cirbp	NM_007705	2.16413	710	627	626	108	107	-550	83	518	657
chr10	80171127	Cirbp	NM_007705	2.19605	731	648	647	129	128	-529	83	518	657
chr10	80171161	Cirbp	NM_007705	2.24772	765	682	681	163	162	-495	83	518	657
chr10	80171164	Cirbp	NM_007705	2.25228	768	685	684	166	165	-492	83	518	657
chr10	80171204	Cirbp	NM_007705	2.31307	808	725	724	206	205	-452	83	518	657
chr10	80171223	Cirbp	NM_007705	2.34195	827	744	743	225	224	-433	83	518	657
chr10	80171254	Cirbp	NM_007705	2.38906	858	775	774	256	255	-402	83	518	657
chr10	80171258	Cirbp	NM_007705	2.39514	862	779	778	260	259	-398	83	518	657
chr10	80171283	Cirbp	NM_007705	2.43313	887	804	803	285	284	-373	83	518	657
chr10	80171289	Cirbp	NM_007705	2.44225	893	810	809	291	290	-367	83	518	657
chr10	80171296	Cirbp	NM_007705	2.45289	900	817	816	298	297	-360	83	518	657
chr10	80171298	Cirbp	NM_007705	2.45593	902	819	818	300	299	-358	83	518	657
chr10	80171301	Cirbp	NM_007705	2.46049	905	822	821	303	302	-355	83	518	657
chr10	80171305	Cirbp	NM_007705	2.46657	909	826	825	307	306	-351	83	518	657
chr10	80171312	Cirbp	NM_007705	2.4772	916	833	832	314	313	-344	83	518	657
chr10	80171329	Cirbp	NM_007705	2.50304	933	850	849	331	330	-327	83	518	657
chr10	80171333	Cirbp	NM_007705	2.50912	937	854	853	335	334	-323	83	518	657
chr10	80171335	Cirbp	NM_007705	2.51216	939	856	855	337	336	-321	83	518	657
chr10	80171525	Cirbp	NM_007705	2.80091	1129	1046	1045	527	526	-131	83	518	657
chr10	80171530	Cirbp	NM_007705	2.80851	1134	1051	1050	532	531	-126	83	518	657
chr10	80171543	Cirbp	NM_007705	2.82827	1147	1064	1063	545	544	-113	83	518	657
chr10	80171547	Cirbp	NM_007705	2.83435	1151	1068	1067	549	548	-109	83	518	657
chr10	80171580	Cirbp	NM_007705	2.8845	1184	1101	1100	582	581	-76	83	518	657
chr10	80171598	Cirbp	NM_007705	2.91185	1202	1119	1118	600	599	-58	83	518	657
chr10	80171601	Cirbp	NM_007705	2.91641	1205	1122	1121	603	602	-55	83	518	657
chr10	80171604	Cirbp	NM_007705	2.92097	1208	1125	1124	606	605	-52	83	518	657
chr10	80171612	Cirbp	NM_007705	2.93313	1216	1133	1132	614	613	-44	83	518	657
chr10	80171634	Cirbp	NM_007705	2.96657	1238	1155	1154	636	635	-22	83	518	657
chr10	80243821	Pwwp3a	NM_023431	2.11859	2393	2227	2226	178	177	-1323	166	2048	1500
chr10	80243873	Pwwp3a	NM_023431	2.15323	2445	2279	2278	230	229	-1271	166	2048	1500
chr10	80243880	Pwwp3a	NM_023431	2.15789	2452	2286	2285	237	236	-1264	166	2048	1500
chr10	80288029	Dazap1	NM_133188	2.45299	1694	1536	1535	318	317	-384	158	1217	701
chr10	80380590	Mex3d	NM_198615	2.72989	3022	2792	2791	635	634	-235	230	2156	869
chr10	80380593	Mex3d	NM_198615	2.72644	3019	2789	2788	632	631	-238	230	2156	869
chr10	80380599	Mex3d	NM_198615	2.71954	3013	2783	2782	626	625	-244	230	2156	869
chr10	80409647	Tcf3	NM_001164149	2.50155	2831	2441	2440	485	484	-482	390	1955	966
chr10	80409661	Tcf3	NM_001164149	2.48707	2817	2427	2426	471	470	-496	390	1955	966
chr10	80409689	Tcf3	NM_001164149	2.45812	2789	2399	2398	443	442	-524	390	1955	966
chr10	80409726	Tcf3	NM_001164149	2.41986	2752	2362	2361	406	405	-561	390	1955	966
chr10	80409931	Tcf3	NM_001164149	2.20786	2547	2157	2156	201	200	-766	390	1955	966
chr10	80583736	Abhd17a	NM_145421	2.53968	1385	1035	1034	102	101	-87	350	932	188
chr10	80615747	Scamp4	NM_019575	2.964	1765	1657	1656	964	963	-36	108	692	999
chr10	80665902	Mknk2	NM_021462	2.67356	2863	2585	2584	1205	1204	-584	278	1379	1788
chr10	80665914	Mknk2	NM_021462	2.66685	2851	2573	2572	1193	1192	-596	278	1379	1788
chr10	80665948	Mknk2	NM_021462	2.64785	2817	2539	2538	1159	1158	-630	278	1379	1788
chr10	80793662	Dot1l	NM_199322	2.07601	5011	4771	4770	148	147	-1799	240	4622	1946
chr10	80796345	Plekhj1	NM_023900	2.21406	1013	562	561	67	66	-246	451	494	312
chr10	80852860	Lsm7	NM_001359149	2.73684	538	443	442	98	97	-35	95	344	132
chr10	81044913	Sgta	NM_001358550	2.10235	1220	1041	1040	96	95	-842	179	944	937
chr10	81319941	Pip5k1c	NM_001146687	2.98504	4176	4081	4080	2173	2172	-33	95	1907	2205
chr10	81530291	Gna11	NM_010301	2.24336	1818	1584	1583	504	503	-1567	234	1079	2070
chr10	82750095	Nfyb	NM_010914	2.18659	1156	944	943	320	319	-1395	212	623	1714
chr10	82750186	Nfyb	NM_010914	2.13353	1065	853	852	229	228	-1486	212	623	1714
chr10	83366196	D10Wsu102e	NM_026579	2.09406	869	832	831	274	273	-2639	37	557	2912
chr10	83366216	D10Wsu102e	NM_026579	2.10093	889	852	851	294	293	-2619	37	557	2912
chr10	83366234	D10Wsu102e	NM_026579	2.10711	907	870	869	312	311	-2601	37	557	2912
chr10	83366340	D10Wsu102e	NM_026579	2.14349	1013	976	975	418	417	-2495	37	557	2912
chr10	83366363	D10Wsu102e	NM_026579	2.15139	1036	999	998	441	440	-2472	37	557	2912
chr10	83366370	D10Wsu102e	NM_026579	2.15379	1043	1006	1005	448	447	-2465	37	557	2912
chr10	84726118	Polr3b	NM_027423	2.24177	3908	3740	3739	338	337	-1060	168	3401	1397
chr10	84726237	Polr3b	NM_027423	2.3269	4027	3859	3858	457	456	-941	168	3401	1397
chr10	84726244	Polr3b	NM_027423	2.3319	4034	3866	3865	464	463	-934	168	3401	1397
chr10	84726251	Polr3b	NM_027423	2.33691	4041	3873	3872	471	470	-927	168	3401	1397
chr10	84726286	Polr3b	NM_027423	2.36195	4076	3908	3907	506	505	-892	168	3401	1397
chr10	84726963	Polr3b	NM_027423	2.84621	4753	4585	4584	1183	1182	-215	168	3401	1397
chr10	85131731	Cry1	NM_007771	2.94935	2984	2402	2401	581	580	-31	582	1820	611
chr10	85132026	Cry1	NM_007771	2.46732	2689	2107	2106	286	285	-326	582	1820	611
chr10	85132204	Cry1	NM_007771	2.17647	2511	1929	1928	108	107	-504	582	1820	611
chr10	85888740	Pwp1	NM_133993	2.62227	2215	2104	2103	598	597	-363	111	1505	960
chr10	85888770	Pwp1	NM_133993	2.65349	2245	2134	2133	628	627	-333	111	1505	960
chr10	85888821	Pwp1	NM_133993	2.70656	2296	2185	2184	679	678	-282	111	1505	960
chr10	85888868	Pwp1	NM_133993	2.75546	2343	2232	2231	726	725	-235	111	1505	960
chr10	85889060	Pwp1	NM_133993	2.95525	2535	2424	2423	918	917	-43	111	1505	960
chr10	85892323	Prdm4	NM_001302886	2.69449	3583	3198	3197	807	806	-355	385	2390	1161
chr10	86691027	Hsp90b1	NM_011631	2.28736	2572	2484	2483	75	74	-186	88	2408	260
chr10	88473003	Sycp3	NM_011517	2.16187	888	810	809	45	44	-233	78	764	277
chr10	88473091	Sycp3	NM_011517	2.47842	976	898	897	133	132	-145	78	764	277
chr10	88473095	Sycp3	NM_011517	2.49281	980	902	901	137	136	-141	78	764	277
chr10	88473100	Sycp3	NM_011517	2.51079	985	907	906	142	141	-136	78	764	277
chr10	88473133	Sycp3	NM_011517	2.6295	1018	940	939	175	174	-103	78	764	277
chr10	88473146	Sycp3	NM_011517	2.67626	1031	953	952	188	187	-90	78	764	277
chr10	88473163	Sycp3	NM_011517	2.73741	1048	970	969	205	204	-73	78	764	277
chr10	88473177	Sycp3	NM_011517	2.78777	1062	984	983	219	218	-59	78	764	277
chr10	88473181	Sycp3	NM_011517	2.80216	1066	988	987	223	222	-55	78	764	277
chr10	88473184	Sycp3	NM_011517	2.81295	1069	991	990	226	225	-52	78	764	277
chr10	88473194	Sycp3	NM_011517	2.84892	1079	1001	1000	236	235	-42	78	764	277
chr10	88473197	Sycp3	NM_011517	2.85971	1082	1004	1003	239	238	-39	78	764	277
chr10	89409332	Gas2l3	NM_001284344	2.88272	5250	4938	4937	3831	3830	-509	312	1106	4339
chr10	89712212	Actr6	NM_025914	2.473	1463	1410	1409	219	218	-244	53	1190	462
chr10	89712276	Actr6	NM_025914	2.33477	1399	1346	1345	155	154	-308	53	1190	462
chr10	91160448	Tmpo	NM_011605	2.97825	3781	3476	3475	1394	1393	-31	305	2081	1424
chr10	91160537	Tmpo	NM_011605	2.91579	3692	3387	3386	1305	1304	-120	305	2081	1424
chr10	93239831	Cdk17	NM_146239	2.11998	2131	1778	1777	206	205	-1511	353	1571	1716
chr10	93240016	Cdk17	NM_146239	2.22772	2316	1963	1962	391	390	-1326	353	1571	1716
chr10	93240051	Cdk17	NM_146239	2.24811	2351	1998	1997	426	425	-1291	353	1571	1716
chr10	93240098	Cdk17	NM_146239	2.27548	2398	2045	2044	473	472	-1244	353	1571	1716
chr10	93240100	Cdk17	NM_146239	2.27665	2400	2047	2046	475	474	-1242	353	1571	1716
chr10	93240111	Cdk17	NM_146239	2.28305	2411	2058	2057	486	485	-1231	353	1571	1716
chr10	93240887	Cdk17	NM_146239	2.735	3187	2834	2833	1262	1261	-455	353	1571	1716
chr10	93240945	Cdk17	NM_146239	2.76878	3245	2892	2891	1320	1319	-397	353	1571	1716
chr10	93240974	Cdk17	NM_146239	2.78567	3274	2921	2920	1349	1348	-368	353	1571	1716
chr10	93240985	Cdk17	NM_146239	2.79208	3285	2932	2931	1360	1359	-357	353	1571	1716
chr10	93241019	Cdk17	NM_146239	2.81188	3319	2966	2965	1394	1393	-323	353	1571	1716
chr10	93241289	Cdk17	NM_146239	2.96913	3589	3236	3235	1664	1663	-53	353	1571	1716
chr10	93241296	Cdk17	NM_146239	2.97321	3596	3243	3242	1671	1670	-46	353	1571	1716
chr10	93583419	Snrpf	NM_027246	2.10345	422	306	305	45	44	-390	116	260	434
chr10	93861016	Metap2	NM_019648	2.11678	2462	1771	1770	334	333	-2526	691	1436	2859
chr10	93861145	Metap2	NM_019648	2.07168	2333	1642	1641	205	204	-2655	691	1436	2859
chr10	93861261	Metap2	NM_019648	2.03112	2217	1526	1525	89	88	-2771	691	1436	2859
chr10	94141910	Fgd6	NM_053072	2.03408	4614	4321	4320	121	120	-3429	293	4199	3549
chr10	94141925	Fgd6	NM_053072	2.03831	4629	4336	4335	136	135	-3414	293	4199	3549
chr10	94144652	Fgd6	NM_053072	2.80648	7356	7063	7062	2863	2862	-687	293	4199	3549
chr10	94590023	Tmcc3	NM_001359762	2.76274	4719	4379	4378	2993	2992	-931	340	1385	3923
chr10	94590256	Tmcc3	NM_001359762	2.82212	4952	4612	4611	3226	3225	-698	340	1385	3923
chr10	95547044	Nudt4	NM_027722	2.98378	3172	2784	2783	2244	2243	-37	388	539	2280
chr10	95547124	Nudt4	NM_027722	2.94871	3092	2704	2703	2164	2163	-117	388	539	2280
chr10	99023518	Atp2b1	NM_026482	2.13194	4504	4062	4061	399	398	-2625	442	3662	3023
chr10	99023562	Atp2b1	NM_026482	2.14649	4548	4106	4105	443	442	-2581	442	3662	3023
chr10	99023582	Atp2b1	NM_026482	2.15311	4568	4126	4125	463	462	-2561	442	3662	3023
chr10	99023589	Atp2b1	NM_026482	2.15542	4575	4133	4132	470	469	-2554	442	3662	3023
chr10	99023865	Atp2b1	NM_026482	2.24669	4851	4409	4408	746	745	-2278	442	3662	3023
chr10	99023887	Atp2b1	NM_026482	2.25397	4873	4431	4430	768	767	-2256	442	3662	3023
chr10	99023970	Atp2b1	NM_026482	2.28142	4956	4514	4513	851	850	-2173	442	3662	3023
chr10	99023978	Atp2b1	NM_026482	2.28406	4964	4522	4521	859	858	-2165	442	3662	3023
chr10	100444005	Tmtc3	NM_001110013	2.96597	5886	5687	5686	2924	2923	-103	199	2762	3026
chr10	100444295	Tmtc3	NM_001110013	2.87017	5596	5397	5396	2634	2633	-393	199	2762	3026
chr10	108277485	Ppp1r12a	NM_027892	2.1065	3614	3313	3312	298	297	-2500	301	3014	2797
chr10	108277491	Ppp1r12a	NM_027892	2.10865	3620	3319	3318	304	303	-2494	301	3014	2797
chr10	108413900	Pawr	NM_054056	2.2292	1336	1148	1147	146	145	-491	188	1001	636
chr10	108413915	Pawr	NM_054056	2.25275	1351	1163	1162	161	160	-476	188	1001	636
chr10	111497860	Nap1l1	NM_015781	2.79678	2457	2313	2312	1137	1136	-290	144	1175	1426
chr10	111984888	Krr1	NM_178610	2.05521	1447	1350	1349	207	206	-3542	97	1142	3748
chr10	112925774	Atxn7l3b	NM_001033474	2.88471	3252	2949	2948	2655	2654	-346	303	293	3000
chr10	112925958	Atxn7l3b	NM_001033474	2.82339	3068	2765	2764	2471	2470	-530	303	293	3000
chr10	112925960	Atxn7l3b	NM_001033474	2.82273	3066	2763	2762	2469	2468	-532	303	293	3000
chr10	112925979	Atxn7l3b	NM_001033474	2.81639	3047	2744	2743	2450	2449	-551	303	293	3000
chr10	112925989	Atxn7l3b	NM_001033474	2.81306	3037	2734	2733	2440	2439	-561	303	293	3000
chr10	112926653	Atxn7l3b	NM_001033474	2.5918	2373	2070	2069	1776	1775	-1225	303	293	3000
chr10	112926661	Atxn7l3b	NM_001033474	2.58914	2365	2062	2061	1768	1767	-1233	303	293	3000
chr10	112926719	Atxn7l3b	NM_001033474	2.56981	2307	2004	2003	1710	1709	-1291	303	293	3000
chr10	112926758	Atxn7l3b	NM_001033474	2.55681	2268	1965	1964	1671	1670	-1330	303	293	3000
chr10	112926762	Atxn7l3b	NM_001033474	2.55548	2264	1961	1960	1667	1666	-1334	303	293	3000
chr10	112926768	Atxn7l3b	NM_001033474	2.55348	2258	1955	1954	1661	1660	-1340	303	293	3000
chr10	112926771	Atxn7l3b	NM_001033474	2.55248	2255	1952	1951	1658	1657	-1343	303	293	3000
chr10	112927517	Atxn7l3b	NM_001033474	2.3039	1509	1206	1205	912	911	-2089	303	293	3000
chr10	115289893	Rab21	NM_024454	2.96593	1792	1548	1547	879	878	-31	244	668	909
chr10	115340770	Tmem19	NM_001359470	2.98301	3057	2792	2791	1736	1735	-30	265	1055	1765
chr10	115341979	Tmem19	NM_001359470	2.29841	1848	1583	1582	527	526	-1239	265	1055	1765
chr10	116112163	Taf7l2	NM_001161855	2.39072	1754	1457	1456	320	319	-499	297	1136	818
chr10	116112172	Taf7l2	NM_001161855	2.37973	1745	1448	1447	311	310	-508	297	1136	818
chr10	117051048	Cct2	NM_001358767	2.79518	2018	1806	1805	198	197	-51	212	1607	248
chr10	117051054	Cct2	NM_001358767	2.77108	2012	1800	1799	192	191	-57	212	1607	248
chr10	117051134	Cct2	NM_001358767	2.4498	1932	1720	1719	112	111	-137	212	1607	248
chr10	117070479	Frs2	NM_177798	2.90742	5331	4977	4976	3450	3449	-352	354	1526	3801
chr10	117071637	Frs2	NM_177798	2.60284	4173	3819	3818	2292	2291	-1510	354	1526	3801
chr10	117072904	Frs2	NM_177798	2.26959	2906	2552	2551	1025	1024	-2777	354	1526	3801
chr10	117073030	Frs2	NM_177798	2.23645	2780	2426	2425	899	898	-2903	354	1526	3801
chr10	117073055	Frs2	NM_177798	2.22988	2755	2401	2400	874	873	-2928	354	1526	3801
chr10	117215248	Yeats4	NM_026570	2.79658	1300	1103	1102	419	418	-107	197	683	525
chr10	117215252	Yeats4	NM_026570	2.78897	1296	1099	1098	415	414	-111	197	683	525
chr10	117215268	Yeats4	NM_026570	2.75856	1280	1083	1082	399	398	-127	197	683	525
chr10	117215300	Yeats4	NM_026570	2.69772	1248	1051	1050	367	366	-159	197	683	525
chr10	117215303	Yeats4	NM_026570	2.69202	1245	1048	1047	364	363	-162	197	683	525
chr10	117215351	Yeats4	NM_026570	2.60076	1197	1000	999	316	315	-210	197	683	525
chr10	117215407	Yeats4	NM_026570	2.4943	1141	944	943	260	259	-266	197	683	525
chr10	117215431	Yeats4	NM_026570	2.44867	1117	920	919	236	235	-290	197	683	525
chr10	117215461	Yeats4	NM_026570	2.39163	1087	890	889	206	205	-320	197	683	525
chr10	117349018	Cpsf6	NM_001013391	2.09432	2183	2109	2108	453	452	-4350	74	1655	4802
chr10	117349116	Cpsf6	NM_001013391	2.07391	2085	2011	2010	355	354	-4448	74	1655	4802
chr10	117349124	Cpsf6	NM_001013391	2.07225	2077	2003	2002	347	346	-4456	74	1655	4802
chr10	117349130	Cpsf6	NM_001013391	2.071	2071	1997	1996	341	340	-4462	74	1655	4802
chr10	117349144	Cpsf6	NM_001013391	2.06808	2057	1983	1982	327	326	-4476	74	1655	4802
chr10	117349234	Cpsf6	NM_001013391	2.04934	1967	1893	1892	237	236	-4566	74	1655	4802
chr10	117349263	Cpsf6	NM_001013391	2.04331	1938	1864	1863	208	207	-4595	74	1655	4802
chr10	117349268	Cpsf6	NM_001013391	2.04227	1933	1859	1858	203	202	-4600	74	1655	4802
chr10	117688932	Mdm2	NM_010786	2.9573	3041	2748	2747	1278	1277	-57	293	1469	1334
chr10	117689319	Mdm2	NM_010786	2.66742	2654	2361	2360	891	890	-444	293	1469	1334
chr10	117689398	Mdm2	NM_010786	2.60824	2575	2282	2281	812	811	-523	293	1469	1334
chr10	117689502	Mdm2	NM_010786	2.53034	2471	2178	2177	708	707	-627	293	1469	1334
chr10	117689794	Mdm2	NM_010786	2.31161	2179	1886	1885	416	415	-919	293	1469	1334
chr10	117689841	Mdm2	NM_010786	2.2764	2132	1839	1838	369	368	-966	293	1469	1334
chr10	117689965	Mdm2	NM_010786	2.18352	2008	1715	1714	245	244	-1090	293	1469	1334
chr10	117689970	Mdm2	NM_010786	2.17978	2003	1710	1709	240	239	-1095	293	1469	1334
chr10	117750683	Nup107	NM_134010	2.81567	3051	2958	2957	177	176	-40	93	2780	216
chr10	117750739	Nup107	NM_134010	2.5576	2995	2902	2901	121	120	-96	93	2780	216
chr10	117750744	Nup107	NM_134010	2.53456	2990	2897	2896	116	115	-101	93	2780	216
chr10	117814663	Rap1b	NM_024457	2.94563	1870	1703	1702	1148	1147	-66	167	554	1213
chr10	117815086	Rap1b	NM_024457	2.5972	1447	1280	1279	725	724	-489	167	554	1213
chr10	117815088	Rap1b	NM_024457	2.59555	1445	1278	1277	723	722	-491	167	554	1213
chr10	117815094	Rap1b	NM_024457	2.59061	1439	1272	1271	717	716	-497	167	554	1213
chr10	117815130	Rap1b	NM_024457	2.56096	1403	1236	1235	681	680	-533	167	554	1213
chr10	117815262	Rap1b	NM_024457	2.45222	1271	1104	1103	549	548	-665	167	554	1213
chr10	117815603	Rap1b	NM_024457	2.17133	930	763	762	208	207	-1006	167	554	1213
chr10	119202685	Cand1	NM_027994	2.071	4335	3989	3988	296	295	-3873	346	3692	4168
chr10	119202764	Cand1	NM_027994	2.05205	4256	3910	3909	217	216	-3952	346	3692	4168
chr10	119202828	Cand1	NM_027994	2.0367	4192	3846	3845	153	152	-4016	346	3692	4168
chr10	119202880	Cand1	NM_027994	2.02423	4140	3794	3793	101	100	-4068	346	3692	4168
chr10	120923479	Lemd3	NM_001081193	2.96569	4674	4671	4670	1914	1913	-68	3	2756	1981
chr10	120923882	Lemd3	NM_001081193	2.76236	4271	4268	4267	1511	1510	-471	3	2756	1981
chr10	121410381	Rassf3	NM_138956	2.98839	3393	3254	3253	2555	2554	-30	139	698	2584
chr10	121410424	Rassf3	NM_138956	2.97176	3350	3211	3210	2512	2511	-73	139	698	2584
chr10	121410427	Rassf3	NM_138956	2.9706	3347	3208	3207	2509	2508	-76	139	698	2584
chr10	121410442	Rassf3	NM_138956	2.9648	3332	3193	3192	2494	2493	-91	139	698	2584
chr10	121410448	Rassf3	NM_138956	2.96248	3326	3187	3186	2488	2487	-97	139	698	2584
chr10	121410453	Rassf3	NM_138956	2.96054	3321	3182	3181	2483	2482	-102	139	698	2584
chr10	121411089	Rassf3	NM_138956	2.71451	2685	2546	2545	1847	1846	-738	139	698	2584
chr10	121411105	Rassf3	NM_138956	2.70832	2669	2530	2529	1831	1830	-754	139	698	2584
chr10	121411126	Rassf3	NM_138956	2.70019	2648	2509	2508	1810	1809	-775	139	698	2584
chr10	121411130	Rassf3	NM_138956	2.69865	2644	2505	2504	1806	1805	-779	139	698	2584
chr10	121411369	Rassf3	NM_138956	2.60619	2405	2266	2265	1567	1566	-1018	139	698	2584
chr10	121411397	Rassf3	NM_138956	2.59536	2377	2238	2237	1539	1538	-1046	139	698	2584
chr10	121411418	Rassf3	NM_138956	2.58723	2356	2217	2216	1518	1517	-1067	139	698	2584
chr10	121411727	Rassf3	NM_138956	2.4677	2047	1908	1907	1209	1208	-1376	139	698	2584
chr10	121411732	Rassf3	NM_138956	2.46576	2042	1903	1902	1204	1203	-1381	139	698	2584
chr10	121412709	Rassf3	NM_138956	2.08781	1065	926	925	227	226	-2358	139	698	2584
chr10	121589734	Xpot	NM_001359618	2.16347	3625	3349	3348	460	459	-2354	276	2888	2813
chr10	121589742	Xpot	NM_001359618	2.16063	3617	3341	3340	452	451	-2362	276	2888	2813
chr10	121589751	Xpot	NM_001359618	2.15743	3608	3332	3331	443	442	-2371	276	2888	2813
chr10	121589766	Xpot	NM_001359618	2.1521	3593	3317	3316	428	427	-2386	276	2888	2813
chr10	121589823	Xpot	NM_001359618	2.13184	3536	3260	3259	371	370	-2443	276	2888	2813
chr10	121589928	Xpot	NM_001359618	2.09453	3431	3155	3154	266	265	-2548	276	2888	2813
chr10	121590130	Xpot	NM_001359618	2.02274	3229	2953	2952	64	63	-2750	276	2888	2813
chr10	121751187	BC048403	NM_173022	2.03895	1451	1406	1405	68	67	-1678	45	1337	1745
chr10	126997303	Ctdsp2	NM_001113470	2.23416	2150	1630	1629	817	816	-2672	520	812	3488
chr10	127499201	R3hdm2	NM_001359246	2.72889	4107	3573	3572	492	491	-183	534	3080	674
chr10	127499309	R3hdm2	NM_001359246	2.88889	4215	3681	3680	600	599	-75	534	3080	674
chr10	127499318	R3hdm2	NM_001359246	2.90222	4224	3690	3689	609	608	-66	534	3080	674
chr10	127499341	R3hdm2	NM_001359246	2.9363	4247	3713	3712	632	631	-43	534	3080	674
chr10	127517348	Shmt2	NM_028230	2.66216	2079	1956	1955	441	440	-225	123	1514	665
chr10	127517405	Shmt2	NM_028230	2.57658	2022	1899	1898	384	383	-282	123	1514	665
chr10	127660951	Nab2	NM_001122895	2.95612	2349	2105	2104	719	718	-33	244	1385	751
chr10	127660951	Stat6	NM_009284	2.96421	3768	3484	3483	970	969	-36	284	2513	1005
chr10	127661180	Nab2	NM_001122895	2.6516	2120	1876	1875	490	489	-262	244	1385	751
chr10	128077006	Ptges3	NM_019766	2.78767	1705	1403	1402	920	919	-248	302	482	1167
chr10	128077018	Ptges3	NM_019766	2.79795	1717	1415	1414	932	931	-236	302	482	1167
chr10	128077029	Ptges3	NM_019766	2.80736	1728	1426	1425	943	942	-225	302	482	1167
chr10	128077089	Ptges3	NM_019766	2.85873	1788	1486	1485	1003	1002	-165	302	482	1167
chr10	128090180	Atp5b	NM_016774	2.22677	1670	1651	1650	61	60	-208	19	1589	268
chr10	128128486	Baz2a	NM_054078	2.67961	7551	7397	7396	1733	1732	-817	154	5663	2549
chr10	128129139	Baz2a	NM_054078	2.93569	8204	8050	8049	2386	2385	-164	154	5663	2549
chr10	128129183	Baz2a	NM_054078	2.95294	8248	8094	8093	2430	2429	-120	154	5663	2549
chr10	128321277	Pan2	NM_001252326	2.86341	4341	4088	4087	512	511	-81	253	3575	592
chr10	128439070	Rnf41	NM_001164237	2.21151	2005	1590	1589	636	635	-2371	415	953	3006
chr10	128439263	Rnf41	NM_001164237	2.27569	2198	1783	1782	829	828	-2178	415	953	3006
chr10	128439300	Rnf41	NM_001164237	2.28799	2235	1820	1819	866	865	-2141	415	953	3006
chr10	128439357	Rnf41	NM_001164237	2.30695	2292	1877	1876	923	922	-2084	415	953	3006
chr10	128624591	Rps26	NM_013765	2.13889	385	358	357	10	9	-62	27	347	71
chr10	128697975	Cdk2	NM_016756	2.96915	2251	2028	2027	1131	1130	-36	223	896	1166
chr10	128697988	Cdk2	NM_016756	2.95801	2238	2015	2014	1118	1117	-49	223	896	1166
chr10	128697995	Cdk2	NM_016756	2.95201	2231	2008	2007	1111	1110	-56	223	896	1166
chr10	128698055	Cdk2	NM_016756	2.9006	2171	1948	1947	1051	1050	-116	223	896	1166
chr10	128698111	Cdk2	NM_016756	2.85261	2115	1892	1891	995	994	-172	223	896	1166
chr10	128698172	Cdk2	NM_016756	2.80034	2054	1831	1830	934	933	-233	223	896	1166
chr10	128698178	Cdk2	NM_016756	2.7952	2048	1825	1824	928	927	-239	223	896	1166
chr10	128698496	Cdk2	NM_016756	2.52271	1730	1507	1506	610	609	-557	223	896	1166
chr10	128698593	Cdk2	NM_016756	2.43959	1633	1410	1409	513	512	-654	223	896	1166
chr10	128698622	Cdk2	NM_016756	2.41474	1604	1381	1380	484	483	-683	223	896	1166
chr10	128766425	Pym1	NM_001253704	2.84995	1076	999	998	810	809	-143	77	188	952
chr10	128818082	Dnajc14	NM_001359825	2.32941	2955	2783	2782	671	670	-1366	172	2111	2036
chr10	128818082	Ormdl2	NM_001359170	2.81595	1473	1260	1259	798	797	-180	213	461	977
chr10	128877432	Sarnp	NM_001359406	2.2197	915	442	441	58	57	-206	473	383	263
chr11	3244447	Eif4enif1	NM_001166547	2.71743	3537	3310	3309	358	357	-141	227	2951	498
chr11	3244552	Eif4enif1	NM_001166547	2.92786	3642	3415	3414	463	462	-36	227	2951	498
chr11	3244563	Eif4enif1	NM_001166547	2.9499	3653	3426	3425	474	473	-25	227	2951	498
chr11	3308176	Patz1	NM_019574	2.10816	2192	2036	2035	110	109	-907	156	1925	1016
chr11	3308670	Patz1	NM_019574	2.5939	2686	2530	2529	604	603	-413	156	1925	1016
chr11	3308682	Patz1	NM_019574	2.6057	2698	2542	2541	616	615	-401	156	1925	1016
chr11	3308733	Patz1	NM_019574	2.65585	2749	2593	2592	667	666	-350	156	1925	1016
chr11	3308749	Patz1	NM_019574	2.67158	2765	2609	2608	683	682	-334	156	1925	1016
chr11	3308814	Patz1	NM_019574	2.7355	2830	2674	2673	748	747	-269	156	1925	1016
chr11	3308832	Patz1	NM_019574	2.7532	2848	2692	2691	766	765	-251	156	1925	1016
chr11	3308836	Patz1	NM_019574	2.75713	2852	2696	2695	770	769	-247	156	1925	1016
chr11	3308853	Patz1	NM_019574	2.77384	2869	2713	2712	787	786	-230	156	1925	1016
chr11	3308868	Patz1	NM_019574	2.78859	2884	2728	2727	802	801	-215	156	1925	1016
chr11	3308891	Patz1	NM_019574	2.81121	2907	2751	2750	825	824	-192	156	1925	1016
chr11	3308903	Patz1	NM_019574	2.82301	2919	2763	2762	837	836	-180	156	1925	1016
chr11	3309062	Patz1	NM_019574	2.97935	3078	2922	2921	996	995	-21	156	1925	1016
chr11	3690232	Morc2a	NM_001363202	2.82169	5164	4222	4221	1129	1128	-245	942	3092	1373
chr11	4180231	Sf3a1	NM_026175	2.0399	2605	2472	2471	96	95	-2310	133	2375	2405
chr11	4180268	Sf3a1	NM_026175	2.05528	2642	2509	2508	133	132	-2273	133	2375	2405
chr11	4180489	Sf3a1	NM_026175	2.14713	2863	2730	2729	354	353	-2052	133	2375	2405
chr11	4180496	Sf3a1	NM_026175	2.15004	2870	2737	2736	361	360	-2045	133	2375	2405
chr11	4180573	Sf3a1	NM_026175	2.18204	2947	2814	2813	438	437	-1968	133	2375	2405
chr11	4180584	Sf3a1	NM_026175	2.18662	2958	2825	2824	449	448	-1957	133	2375	2405
chr11	4180586	Sf3a1	NM_026175	2.18745	2960	2827	2826	451	450	-1955	133	2375	2405
chr11	4180595	Sf3a1	NM_026175	2.19119	2969	2836	2835	460	459	-1946	133	2375	2405
chr11	4180602	Sf3a1	NM_026175	2.1941	2976	2843	2842	467	466	-1939	133	2375	2405
chr11	4181525	Sf3a1	NM_026175	2.57772	3899	3766	3765	1390	1389	-1016	133	2375	2405
chr11	4182430	Sf3a1	NM_026175	2.95387	4804	4671	4670	2295	2294	-111	133	2375	2405
chr11	4480919	Mtmr3	NM_028860	2.97316	5622	5329	5328	1849	1848	-51	293	3479	1899
chr11	4480961	Mtmr3	NM_028860	2.95105	5580	5287	5286	1807	1806	-93	293	3479	1899
chr11	4481046	Mtmr3	NM_028860	2.90632	5495	5202	5201	1722	1721	-178	293	3479	1899
chr11	4481077	Mtmr3	NM_028860	2.89	5464	5171	5170	1691	1690	-209	293	3479	1899
chr11	4482608	Mtmr3	NM_028860	2.08421	3933	3640	3639	160	159	-1740	293	3479	1899
chr11	5069742	Ewsr1	NM_001283062	2.85411	2253	2179	2178	322	321	-55	74	1856	376
chr11	5279356	Znrf3	NM_001290501	2.32206	4171	3868	3867	1438	1437	-3027	303	2429	4464
chr11	5528918	Ccdc117	NM_134033	2.98754	3370	3212	3211	2378	2377	-30	158	833	2407
chr11	5529133	Ccdc117	NM_134033	2.89826	3155	2997	2996	2163	2162	-245	158	833	2407
chr11	5529982	Ccdc117	NM_134033	2.54568	2306	2148	2147	1314	1313	-1094	158	833	2407
chr11	5529989	Ccdc117	NM_134033	2.54277	2299	2141	2140	1307	1306	-1101	158	833	2407
chr11	5967746	Ykt6	NM_019661	2.97985	2441	2299	2298	1702	1701	-35	142	596	1736
chr11	6106152	Nudcd3	NM_173748	2.81982	3501	3185	3184	2093	2092	-460	316	1091	2552
chr11	6356552	Ogdh	NM_001252288	2.25673	4120	3938	3937	878	877	-2542	182	3059	3419
chr11	6428191	H2afv	NM_029938	2.15721	670	567	566	180	179	-965	103	386	1144
chr11	6428242	H2afv	NM_029938	2.11266	619	516	515	129	128	-1016	103	386	1144
chr11	6428256	H2afv	NM_029938	2.10044	605	502	501	115	114	-1030	103	386	1144
chr11	11800779	Fignl1	NM_021891	2.31232	2472	2275	2274	223	222	-491	197	2051	713
chr11	11800805	Fignl1	NM_021891	2.27591	2446	2249	2248	197	196	-517	197	2051	713
chr11	11800918	Fignl1	NM_021891	2.11765	2333	2136	2135	84	83	-630	197	2051	713
chr11	11930539	Grb10	NM_010345	2.9865	5048	4715	4714	2924	2923	-40	333	1790	2963
chr11	11930910	Grb10	NM_010345	2.86134	4677	4344	4343	2553	2552	-411	333	1790	2963
chr11	11931646	Grb10	NM_010345	2.61302	3941	3608	3607	1817	1816	-1147	333	1790	2963
chr11	11931690	Grb10	NM_010345	2.59818	3897	3564	3563	1773	1772	-1191	333	1790	2963
chr11	11931701	Grb10	NM_010345	2.59447	3886	3553	3552	1762	1761	-1202	333	1790	2963
chr11	17198592	Ppp3r1	NM_024459	2.1379	1040	799	798	286	285	-1788	241	512	2073
chr11	17198594	Ppp3r1	NM_024459	2.13886	1042	801	800	288	287	-1786	241	512	2073
chr11	17198633	Ppp3r1	NM_024459	2.15767	1081	840	839	327	326	-1747	241	512	2073
chr11	17198664	Ppp3r1	NM_024459	2.17261	1112	871	870	358	357	-1716	241	512	2073
chr11	17198759	Ppp3r1	NM_024459	2.21842	1207	966	965	453	452	-1621	241	512	2073
chr11	17198769	Ppp3r1	NM_024459	2.22324	1217	976	975	463	462	-1611	241	512	2073
chr11	17198846	Ppp3r1	NM_024459	2.26037	1294	1053	1052	540	539	-1534	241	512	2073
chr11	17198869	Ppp3r1	NM_024459	2.27146	1317	1076	1075	563	562	-1511	241	512	2073
chr11	17198890	Ppp3r1	NM_024459	2.28158	1338	1097	1096	584	583	-1490	241	512	2073
chr11	17198896	Ppp3r1	NM_024459	2.28447	1344	1103	1102	590	589	-1484	241	512	2073
chr11	17198921	Ppp3r1	NM_024459	2.29653	1369	1128	1127	615	614	-1459	241	512	2073
chr11	17198997	Ppp3r1	NM_024459	2.33317	1445	1204	1203	691	690	-1383	241	512	2073
chr11	17199134	Ppp3r1	NM_024459	2.39923	1582	1341	1340	828	827	-1246	241	512	2073
chr11	17199152	Ppp3r1	NM_024459	2.40791	1600	1359	1358	846	845	-1228	241	512	2073
chr11	17199509	Ppp3r1	NM_024459	2.58004	1957	1716	1715	1203	1202	-871	241	512	2073
chr11	17199872	Ppp3r1	NM_024459	2.75506	2320	2079	2078	1566	1565	-508	241	512	2073
chr11	17200104	Ppp3r1	NM_024459	2.86692	2552	2311	2310	1798	1797	-276	241	512	2073
chr11	17200111	Ppp3r1	NM_024459	2.8703	2559	2318	2317	1805	1804	-269	241	512	2073
chr11	17200241	Ppp3r1	NM_024459	2.93298	2689	2448	2447	1935	1934	-139	241	512	2073
chr11	17200270	Ppp3r1	NM_024459	2.94696	2718	2477	2476	1964	1963	-110	241	512	2073
chr11	17200283	Ppp3r1	NM_024459	2.95323	2731	2490	2489	1977	1976	-97	241	512	2073
chr11	17200290	Ppp3r1	NM_024459	2.95661	2738	2497	2496	1984	1983	-90	241	512	2073
chr11	17200325	Ppp3r1	NM_024459	2.97348	2773	2532	2531	2019	2018	-55	241	512	2073
chr11	17200335	Ppp3r1	NM_024459	2.9783	2783	2542	2541	2029	2028	-45	241	512	2073
chr11	17266760	C1d	NM_001330649	2.0262	819	491	490	65	64	-2416	328	425	2480
chr11	17266932	C1d	NM_001330649	2.09553	991	663	662	237	236	-2244	328	425	2480
chr11	17266947	C1d	NM_001330649	2.10157	1006	678	677	252	251	-2229	328	425	2480
chr11	17267103	C1d	NM_001330649	2.16445	1162	834	833	408	407	-2073	328	425	2480
chr11	17267198	C1d	NM_001330649	2.20274	1257	929	928	503	502	-1978	328	425	2480
chr11	17267212	C1d	NM_001330649	2.20838	1271	943	942	517	516	-1964	328	425	2480
chr11	17940018	Etaa1	NM_026576	2.14121	2922	2842	2841	208	207	-1265	80	2633	1472
chr11	20225049	Rab1a	NM_008996	2.10144	1039	822	821	204	203	-1807	217	617	2010
chr11	20225070	Rab1a	NM_008996	2.11188	1060	843	842	225	224	-1786	217	617	2010
chr11	20225119	Rab1a	NM_008996	2.13625	1109	892	891	274	273	-1737	217	617	2010
chr11	20225148	Rab1a	NM_008996	2.15067	1138	921	920	303	302	-1708	217	617	2010
chr11	20225156	Rab1a	NM_008996	2.15465	1146	929	928	311	310	-1700	217	617	2010
chr11	20225158	Rab1a	NM_008996	2.15564	1148	931	930	313	312	-1698	217	617	2010
chr11	20225169	Rab1a	NM_008996	2.16111	1159	942	941	324	323	-1687	217	617	2010
chr11	20225184	Rab1a	NM_008996	2.16857	1174	957	956	339	338	-1672	217	617	2010
chr11	20225204	Rab1a	NM_008996	2.17852	1194	977	976	359	358	-1652	217	617	2010
chr11	20225212	Rab1a	NM_008996	2.1825	1202	985	984	367	366	-1644	217	617	2010
chr11	20225247	Rab1a	NM_008996	2.1999	1237	1020	1019	402	401	-1609	217	617	2010
chr11	20225261	Rab1a	NM_008996	2.20686	1251	1034	1033	416	415	-1595	217	617	2010
chr11	20225273	Rab1a	NM_008996	2.21283	1263	1046	1045	428	427	-1583	217	617	2010
chr11	20225298	Rab1a	NM_008996	2.22526	1288	1071	1070	453	452	-1558	217	617	2010
chr11	20225312	Rab1a	NM_008996	2.23222	1302	1085	1084	467	466	-1544	217	617	2010
chr11	20225349	Rab1a	NM_008996	2.25062	1339	1122	1121	504	503	-1507	217	617	2010
chr11	20225428	Rab1a	NM_008996	2.28991	1418	1201	1200	583	582	-1428	217	617	2010
chr11	20823632	Lgalsl	NM_173752	2.90819	3357	3259	3258	2740	2739	-277	98	518	3016
chr11	20824937	Lgalsl	NM_173752	2.47564	2052	1954	1953	1435	1434	-1582	98	518	3016
chr11	21149245	Peli1	NM_023324	2.40022	2402	1979	1978	722	721	-1082	423	1256	1803
chr11	21149262	Peli1	NM_023324	2.40965	2419	1996	1995	739	738	-1065	423	1256	1803
chr11	21149383	Peli1	NM_023324	2.47672	2540	2117	2116	860	859	-944	423	1256	1803
chr11	21149391	Peli1	NM_023324	2.48115	2548	2125	2124	868	867	-936	423	1256	1803
chr11	21320321	Vps54	NM_001290628	2.36314	3720	3361	3360	463	462	-812	359	2897	1274
chr11	22974764	Zrsr1	NM_011663	2.12614	2759	1537	1536	250	249	-1732	1222	1286	1981
chr11	22974784	Zrsr1	NM_011663	2.13623	2779	1557	1556	270	269	-1712	1222	1286	1981
chr11	22974826	Zrsr1	NM_011663	2.15742	2821	1599	1598	312	311	-1670	1222	1286	1981
chr11	22974849	Zrsr1	NM_011663	2.16902	2844	1622	1621	335	334	-1647	1222	1286	1981
chr11	22974866	Zrsr1	NM_011663	2.1776	2861	1639	1638	352	351	-1630	1222	1286	1981
chr11	23003315	Cct4	NM_009837	2.88649	1944	1784	1783	164	163	-21	160	1619	184
chr11	23296278	Xpo1	NM_134014	2.11477	3824	3387	3386	171	170	-1319	437	3215	1489
chr11	23296312	Xpo1	NM_134014	2.13758	3858	3421	3420	205	204	-1285	437	3215	1489
chr11	23296316	Xpo1	NM_134014	2.14027	3862	3425	3424	209	208	-1281	437	3215	1489
chr11	23296336	Xpo1	NM_134014	2.15369	3882	3445	3444	229	228	-1261	437	3215	1489
chr11	23296345	Xpo1	NM_134014	2.15973	3891	3454	3453	238	237	-1252	437	3215	1489
chr11	23296373	Xpo1	NM_134014	2.17852	3919	3482	3481	266	265	-1224	437	3215	1489
chr11	23296726	Xpo1	NM_134014	2.41544	4272	3835	3834	619	618	-871	437	3215	1489
chr11	23296769	Xpo1	NM_134014	2.4443	4315	3878	3877	662	661	-828	437	3215	1489
chr11	23296773	Xpo1	NM_134014	2.44698	4319	3882	3881	666	665	-824	437	3215	1489
chr11	23489403	Ahsa2	NM_001290654	2.39547	2170	1847	1846	995	994	-1521	323	851	2515
chr11	23489403	Usp34	NM_001190401	2.15671	11042	10964	10963	215	214	-1157	78	10748	1371
chr11	23489419	Ahsa2	NM_001290654	2.38911	2154	1831	1830	979	978	-1537	323	851	2515
chr11	23489419	Usp34	NM_001190401	2.16837	11058	10980	10979	231	230	-1141	78	10748	1371
chr11	23489450	Ahsa2	NM_001290654	2.37679	2123	1800	1799	948	947	-1568	323	851	2515
chr11	23489450	Usp34	NM_001190401	2.19096	11089	11011	11010	262	261	-1110	78	10748	1371
chr11	23489540	Ahsa2	NM_001290654	2.34102	2033	1710	1709	858	857	-1658	323	851	2515
chr11	23489540	Usp34	NM_001190401	2.25656	11179	11101	11100	352	351	-1020	78	10748	1371
chr11	23649158	Pex13	NM_023651	2.0667	1390	1352	1351	134	133	-1875	38	1217	2008
chr11	23863491	Papolg	NM_172555	2.35595	2918	2687	2686	467	466	-845	231	2219	1311
chr11	23863570	Papolg	NM_172555	2.29573	2839	2608	2607	388	387	-924	231	2219	1311
chr11	29742130	Rtn4	NM_194054	2.04235	3880	3590	3589	101	100	-2284	290	3488	2384
chr11	30099783	Sptbn1	NM_175836	2.64759	7850	7805	7804	713	712	-388	45	7091	1100
chr11	30099882	Sptbn1	NM_175836	2.55767	7751	7706	7705	614	613	-487	45	7091	1100
chr11	30100203	Sptbn1	NM_175836	2.26612	7430	7385	7384	293	292	-808	45	7091	1100
chr11	30100282	Sptbn1	NM_175836	2.19437	7351	7306	7305	214	213	-887	45	7091	1100
chr11	30100291	Sptbn1	NM_175836	2.18619	7342	7297	7296	205	204	-896	45	7091	1100
chr11	30100345	Sptbn1	NM_175836	2.13715	7288	7243	7242	151	150	-950	45	7091	1100
chr11	31101339	Asb3	NM_023906	2.06635	1859	1675	1674	97	96	-1365	184	1577	1461
chr11	31665224	Bod1	NM_001024919	2.89708	1327	1167	1166	645	644	-74	160	521	718
chr11	31665227	Bod1	NM_001024919	2.89291	1324	1164	1163	642	641	-77	160	521	718
chr11	31665234	Bod1	NM_001024919	2.88317	1317	1157	1156	635	634	-84	160	521	718
chr11	31665241	Bod1	NM_001024919	2.87344	1310	1150	1149	628	627	-91	160	521	718
chr11	31935504	Cpeb4	NM_001290676	2.96807	7485	6138	6137	3972	3971	-131	1347	2165	4102
chr11	32517156	Ubtd2	NM_173784	2.30108	1480	1374	1373	669	668	-1553	106	704	2221
chr11	32517453	Ubtd2	NM_173784	2.43474	1777	1671	1670	966	965	-1256	106	704	2221
chr11	32518078	Ubtd2	NM_173784	2.71602	2402	2296	2295	1591	1590	-631	106	704	2221
chr11	32518478	Ubtd2	NM_173784	2.89604	2802	2696	2695	1991	1990	-231	106	704	2221
chr11	32518486	Ubtd2	NM_173784	2.89964	2810	2704	2703	1999	1998	-223	106	704	2221
chr11	32518493	Ubtd2	NM_173784	2.90279	2817	2711	2710	2006	2005	-216	106	704	2221
chr11	32518674	Ubtd2	NM_173784	2.98425	2998	2892	2891	2187	2186	-35	106	704	2221
chr11	32745136	Fbxw11	NM_001271349	2.27328	2493	2158	2157	631	630	-1678	335	1526	2308
chr11	32745143	Fbxw11	NM_001271349	2.27631	2500	2165	2164	638	637	-1671	335	1526	2308
chr11	32745881	Fbxw11	NM_001271349	2.59593	3238	2903	2902	1376	1375	-933	335	1526	2308
chr11	32746281	Fbxw11	NM_001271349	2.76916	3638	3303	3302	1776	1775	-533	335	1526	2308
chr11	32746531	Fbxw11	NM_001271349	2.87744	3888	3553	3552	2026	2025	-283	335	1526	2308
chr11	33152598	Npm1	NM_008722	2.68354	1321	1095	1094	216	215	-100	226	878	315
chr11	35708466	Slit3	NM_011412	2.88767	4954	4896	4895	324	323	-41	58	4571	364
chr11	35785866	Pank3	NM_145962	2.07002	1945	1521	1520	408	407	-5419	424	1112	5826
chr11	35791246	Pank3	NM_145962	2.99331	7325	6901	6900	5788	5787	-39	424	1112	5826
chr11	40679533	Mat2b	NM_134017	2.69155	1637	1496	1495	491	490	-219	141	1004	709
chr11	40679705	Mat2b	NM_134017	2.4493	1465	1324	1323	319	318	-391	141	1004	709
chr11	40679761	Mat2b	NM_134017	2.37042	1409	1268	1267	263	262	-447	141	1004	709
chr11	40679837	Mat2b	NM_134017	2.26338	1333	1192	1191	187	186	-523	141	1004	709
chr11	40749238	Ccng1	NM_009831	2.7038	2800	2515	2514	1630	1629	-686	285	884	2315
chr11	43586902	Ccnjl	NM_001045530	2.92445	2611	2351	2350	1187	1186	-97	260	1163	1283
chr11	43586906	Ccnjl	NM_001045530	2.92757	2615	2355	2354	1191	1190	-93	260	1163	1283
chr11	43586933	Ccnjl	NM_001045530	2.9486	2642	2382	2381	1218	1217	-66	260	1163	1283
chr11	43586993	Ccnjl	NM_001045530	2.99533	2702	2442	2441	1278	1277	-6	260	1163	1283
chr11	45910259	Clint1	NM_001045520	2.72646	3026	2844	2843	972	971	-366	182	1871	1337
chr11	45910303	Clint1	NM_001045520	2.75934	3070	2888	2887	1016	1015	-322	182	1871	1337
chr11	45910592	Clint1	NM_001045520	2.97534	3359	3177	3176	1305	1304	-33	182	1871	1337
chr11	46017960	Sox30	NM_173384	2.94969	2962	2953	2952	604	603	-32	9	2348	635
chr11	46441495	Med7	NM_025426	2.14861	1333	916	915	214	213	-1226	417	701	1439
chr11	48806049	Rack1	NM_008143	2.02041	1061	958	957	4	3	-192	103	953	195
chr11	48806456	Trim41	NM_145377	2.93817	3417	2682	2681	789	788	-52	735	1892	840
chr11	49671870	Cnot6	NM_001290741	2.89908	5367	4997	4996	3323	3322	-373	370	1673	3695
chr11	50200194	Sqstm1	NM_011018	2.93417	1987	1925	1924	596	595	-42	62	1328	637
chr11	50200240	Sqstm1	NM_011018	2.86207	1941	1879	1878	550	549	-88	62	1328	637
chr11	50200412	Sqstm1	NM_011018	2.59248	1769	1707	1706	378	377	-260	62	1328	637
chr11	50200443	Sqstm1	NM_011018	2.54389	1738	1676	1675	347	346	-291	62	1328	637
chr11	50200445	Sqstm1	NM_011018	2.54075	1736	1674	1673	345	344	-293	62	1328	637
chr11	50200451	Sqstm1	NM_011018	2.53135	1730	1668	1667	339	338	-299	62	1328	637
chr11	50294549	Canx	NM_001110499	2.74538	3692	3509	3508	1733	1732	-592	183	1775	2324
chr11	50294876	Canx	NM_001110499	2.60473	3365	3182	3181	1406	1405	-919	183	1775	2324
chr11	50294881	Canx	NM_001110499	2.60258	3360	3177	3176	1401	1400	-924	183	1775	2324
chr11	50295012	Canx	NM_001110499	2.54624	3229	3046	3045	1270	1269	-1055	183	1775	2324
chr11	50295113	Canx	NM_001110499	2.5028	3128	2945	2944	1169	1168	-1156	183	1775	2324
chr11	50295223	Canx	NM_001110499	2.45548	3018	2835	2834	1059	1058	-1266	183	1775	2324
chr11	50295394	Canx	NM_001110499	2.38194	2847	2664	2663	888	887	-1437	183	1775	2324
chr11	50295671	Canx	NM_001110499	2.2628	2570	2387	2386	611	610	-1714	183	1775	2324
chr11	50295716	Canx	NM_001110499	2.24344	2525	2342	2341	566	565	-1759	183	1775	2324
chr11	50295735	Canx	NM_001110499	2.23527	2506	2323	2322	547	546	-1778	183	1775	2324
chr11	50295746	Canx	NM_001110499	2.23054	2495	2312	2311	536	535	-1789	183	1775	2324
chr11	50295768	Canx	NM_001110499	2.22108	2473	2290	2289	514	513	-1811	183	1775	2324
chr11	50295809	Canx	NM_001110499	2.20344	2432	2249	2248	473	472	-1852	183	1775	2324
chr11	50295813	Canx	NM_001110499	2.20172	2428	2245	2244	469	468	-1856	183	1775	2324
chr11	50295832	Canx	NM_001110499	2.19355	2409	2226	2225	450	449	-1875	183	1775	2324
chr11	50295888	Canx	NM_001110499	2.16946	2353	2170	2169	394	393	-1931	183	1775	2324
chr11	50295896	Canx	NM_001110499	2.16602	2345	2162	2161	386	385	-1939	183	1775	2324
chr11	50295904	Canx	NM_001110499	2.16258	2337	2154	2153	378	377	-1947	183	1775	2324
chr11	50295932	Canx	NM_001110499	2.15054	2309	2126	2125	350	349	-1975	183	1775	2324
chr11	50295952	Canx	NM_001110499	2.14194	2289	2106	2105	330	329	-1995	183	1775	2324
chr11	50386209	Hnrnph1	NM_001362523	2.5758	2107	1783	1782	433	432	-319	324	1349	751
chr11	50386288	Hnrnph1	NM_001362523	2.68085	2186	1862	1861	512	511	-240	324	1349	751
chr11	50386296	Hnrnph1	NM_001362523	2.69149	2194	1870	1869	520	519	-232	324	1349	751
chr11	50386354	Hnrnph1	NM_001362523	2.76862	2252	1928	1927	578	577	-174	324	1349	751
chr11	50386359	Hnrnph1	NM_001362523	2.77527	2257	1933	1932	583	582	-169	324	1349	751
chr11	50386373	Hnrnph1	NM_001362523	2.79388	2271	1947	1946	597	596	-155	324	1349	751
chr11	51600907	Hnrnpab	NM_010448	2.38303	1596	1359	1358	501	500	-807	237	857	1307
chr11	51600936	Hnrnpab	NM_010448	2.36086	1567	1330	1329	472	471	-836	237	857	1307
chr11	51600953	Hnrnpab	NM_010448	2.34786	1550	1313	1312	455	454	-853	237	857	1307
chr11	51601038	Hnrnpab	NM_010448	2.28287	1465	1228	1227	370	369	-938	237	857	1307
chr11	51601040	Hnrnpab	NM_010448	2.28135	1463	1226	1225	368	367	-940	237	857	1307
chr11	51601045	Hnrnpab	NM_010448	2.27752	1458	1221	1220	363	362	-945	237	857	1307
chr11	51601047	Hnrnpab	NM_010448	2.27599	1456	1219	1218	361	360	-947	237	857	1307
chr11	51601061	Hnrnpab	NM_010448	2.26529	1442	1205	1204	347	346	-961	237	857	1307
chr11	51601288	Hnrnpab	NM_010448	2.09174	1215	978	977	120	119	-1188	237	857	1307
chr11	51601317	Hnrnpab	NM_010448	2.06957	1186	949	948	91	90	-1217	237	857	1307
chr11	51601330	Hnrnpab	NM_010448	2.05963	1173	936	935	78	77	-1230	237	857	1307
chr11	51813860	Jade2	NM_199299	2.88048	5882	5525	5524	3035	3034	-412	357	2489	3446
chr11	51976281	Cdkn2aipnl	NM_029976	2.25965	808	721	720	370	369	-1055	87	350	1424
chr11	51976660	Cdkn2aipnl	NM_029976	2.52561	1187	1100	1099	749	748	-676	87	350	1424
chr11	51986289	Ube2b	NM_001362685	2.25453	986	852	851	393	392	-1151	134	458	1543
chr11	51986295	Ube2b	NM_001362685	2.25065	980	846	845	387	386	-1157	134	458	1543
chr11	51986339	Ube2b	NM_001362685	2.22215	936	802	801	343	342	-1201	134	458	1543
chr11	51986378	Ube2b	NM_001362685	2.19689	897	763	762	304	303	-1240	134	458	1543
chr11	51986419	Ube2b	NM_001362685	2.17034	856	722	721	263	262	-1281	134	458	1543
chr11	51986458	Ube2b	NM_001362685	2.14508	817	683	682	224	223	-1320	134	458	1543
chr11	51986488	Ube2b	NM_001362685	2.12565	787	653	652	194	193	-1350	134	458	1543
chr11	51986554	Ube2b	NM_001362685	2.0829	721	587	586	128	127	-1416	134	458	1543
chr11	51986611	Ube2b	NM_001362685	2.04598	664	530	529	71	70	-1473	134	458	1543
chr11	52122296	Ppp2ca	NM_019411	2.41548	1476	1252	1251	322	321	-453	224	929	774
chr11	52122502	Ppp2ca	NM_019411	2.68129	1682	1458	1457	528	527	-247	224	929	774
chr11	52122588	Ppp2ca	NM_019411	2.79226	1768	1544	1543	614	613	-161	224	929	774
chr11	52246070	Skp1a	NM_011543	2.05967	665	542	541	50	49	-788	123	491	837
chr11	52246082	Skp1a	NM_011543	2.07399	677	554	553	62	61	-776	123	491	837
chr11	52246092	Skp1a	NM_011543	2.08592	687	564	563	72	71	-766	123	491	837
chr11	52246195	Skp1a	NM_011543	2.20883	790	667	666	175	174	-663	123	491	837
chr11	52246198	Skp1a	NM_011543	2.21241	793	670	669	178	177	-660	123	491	837
chr11	52246201	Skp1a	NM_011543	2.21599	796	673	672	181	180	-657	123	491	837
chr11	52246210	Skp1a	NM_011543	2.22673	805	682	681	190	189	-648	123	491	837
chr11	52246237	Skp1a	NM_011543	2.25895	832	709	708	217	216	-621	123	491	837
chr11	52246256	Skp1a	NM_011543	2.28162	851	728	727	236	235	-602	123	491	837
chr11	52246436	Skp1a	NM_011543	2.49642	1031	908	907	416	415	-422	123	491	837
chr11	52246542	Skp1a	NM_011543	2.62291	1137	1014	1013	522	521	-316	123	491	837
chr11	52246574	Skp1a	NM_011543	2.6611	1169	1046	1045	554	553	-284	123	491	837
chr11	52246591	Skp1a	NM_011543	2.68138	1186	1063	1062	571	570	-267	123	491	837
chr11	52246602	Skp1a	NM_011543	2.69451	1197	1074	1073	582	581	-256	123	491	837
chr11	52246610	Skp1a	NM_011543	2.70406	1205	1082	1081	590	589	-248	123	491	837
chr11	52252363	Tcf7	NM_001313981	2.95	2614	2432	2431	1520	1519	-80	182	911	1599
chr11	52252533	Tcf7	NM_001313981	2.84375	2444	2262	2261	1350	1349	-250	182	911	1599
chr11	52252667	Tcf7	NM_001313981	2.76	2310	2128	2127	1216	1215	-384	182	911	1599
chr11	52252669	Tcf7	NM_001313981	2.75875	2308	2126	2125	1214	1213	-386	182	911	1599
chr11	52252682	Tcf7	NM_001313981	2.75062	2295	2113	2112	1201	1200	-399	182	911	1599
chr11	52252687	Tcf7	NM_001313981	2.7475	2290	2108	2107	1196	1195	-404	182	911	1599
chr11	52252808	Tcf7	NM_001313981	2.67188	2169	1987	1986	1075	1074	-525	182	911	1599
chr11	52407255	9530068E07Rik	NM_153117	2.10868	998	959	958	179	178	-1468	39	779	1646
chr11	52407345	9530068E07Rik	NM_153117	2.16333	1088	1049	1048	269	268	-1378	39	779	1646
chr11	53260053	Hspa4	NM_008300	2.86707	4400	4088	4087	1559	1558	-239	312	2528	1797
chr11	53261394	Hspa4	NM_008300	2.12125	3059	2747	2746	218	217	-1580	312	2528	1797
chr11	53261504	Hspa4	NM_008300	2.06007	2949	2637	2636	108	107	-1690	312	2528	1797
chr11	53332688	Zcchc10	NM_026479	2.13418	643	632	631	95	94	-613	11	536	707
chr11	53332753	Zcchc10	NM_026479	2.22599	708	697	696	160	159	-548	11	536	707
chr11	53333018	Zcchc10	NM_026479	2.60028	973	962	961	425	424	-283	11	536	707
chr11	53333083	Zcchc10	NM_026479	2.69209	1038	1027	1026	490	489	-218	11	536	707
chr11	53333185	Zcchc10	NM_026479	2.83616	1140	1129	1128	592	591	-116	11	536	707
chr11	53333197	Zcchc10	NM_026479	2.85311	1152	1141	1140	604	603	-104	11	536	707
chr11	54517129	Fnip1	NM_173753	2.58274	5168	5051	5050	1553	1552	-1112	117	3497	2664
chr11	54517168	Fnip1	NM_173753	2.59737	5207	5090	5089	1592	1591	-1073	117	3497	2664
chr11	54718904	Cdc42se2	NM_178626	2.35985	1648	1092	1091	837	836	-1489	556	254	2325
chr11	54719093	Cdc42se2	NM_178626	2.27859	1459	903	902	648	647	-1678	556	254	2325
chr11	54719409	Cdc42se2	NM_178626	2.14273	1143	587	586	332	331	-1994	556	254	2325
chr11	54719689	Cdc42se2	NM_178626	2.02236	863	307	306	52	51	-2274	556	254	2325
chr11	55499805	G3bp1	NM_013716	2.11239	1602	1535	1534	137	136	-1082	67	1397	1218
chr11	55499865	G3bp1	NM_013716	2.16161	1662	1595	1594	197	196	-1022	67	1397	1218
chr11	55499880	G3bp1	NM_013716	2.17391	1677	1610	1609	212	211	-1007	67	1397	1218
chr11	55499882	G3bp1	NM_013716	2.17555	1679	1612	1611	214	213	-1005	67	1397	1218
chr11	55500260	G3bp1	NM_013716	2.48564	2057	1990	1989	592	591	-627	67	1397	1218
chr11	55500304	G3bp1	NM_013716	2.52174	2101	2034	2033	636	635	-583	67	1397	1218
chr11	55500310	G3bp1	NM_013716	2.52666	2107	2040	2039	642	641	-577	67	1397	1218
chr11	55500315	G3bp1	NM_013716	2.53076	2112	2045	2044	647	646	-572	67	1397	1218
chr11	55500320	G3bp1	NM_013716	2.53486	2117	2050	2049	652	651	-567	67	1397	1218
chr11	55500801	G3bp1	NM_013716	2.92945	2598	2531	2530	1133	1132	-86	67	1397	1218
chr11	55500814	G3bp1	NM_013716	2.94011	2611	2544	2543	1146	1145	-73	67	1397	1218
chr11	57483029	Fam114a2	NM_001168668	2.96206	2568	2483	2482	989	988	-39	85	1493	1027
chr11	57483033	Fam114a2	NM_001168668	2.95817	2564	2479	2478	985	984	-43	85	1493	1027
chr11	57483039	Fam114a2	NM_001168668	2.95233	2558	2473	2472	979	978	-49	85	1493	1027
chr11	57483042	Fam114a2	NM_001168668	2.94942	2555	2470	2469	976	975	-52	85	1493	1027
chr11	57483076	Fam114a2	NM_001168668	2.91634	2521	2436	2435	942	941	-86	85	1493	1027
chr11	57483092	Fam114a2	NM_001168668	2.90078	2505	2420	2419	926	925	-102	85	1493	1027
chr11	57483129	Fam114a2	NM_001168668	2.86479	2468	2383	2382	889	888	-139	85	1493	1027
chr11	57483196	Fam114a2	NM_001168668	2.79961	2401	2316	2315	822	821	-206	85	1493	1027
chr11	57483200	Fam114a2	NM_001168668	2.79572	2397	2312	2311	818	817	-210	85	1493	1027
chr11	58061988	Larp1	NM_028451	2.98653	6570	6442	6441	3223	3222	-44	128	3218	3266
chr11	58932322	Rnf187	NM_022423	2.96926	1904	1783	1782	1072	1071	-34	121	710	1105
chr11	58955158	Hist3h2a	NM_178218	2.45161	473	421	420	28	27	-34	52	392	61
chr11	59211478	Arf1	NM_001130408	2.94118	1924	1602	1601	1056	1055	-66	322	545	1121
chr11	59211490	Arf1	NM_001130408	2.93048	1912	1590	1589	1044	1043	-78	322	545	1121
chr11	59212169	Arf1	NM_001130408	2.32531	1233	911	910	365	364	-757	322	545	1121
chr11	59784002	Pld6	NM_001290283	2.89954	1663	1642	1641	976	975	-109	21	665	1084
chr11	59784008	Pld6	NM_001290283	2.89401	1657	1636	1635	970	969	-115	21	665	1084
chr11	59791834	Flcn	NM_146018	2.64559	3033	2516	2515	776	775	-426	517	1739	1201
chr11	59792338	Flcn	NM_146018	2.22629	2529	2012	2011	272	271	-930	517	1739	1201
chr11	60199034	Rai1	NM_009021	2.86	7186	6659	6658	989	988	-161	527	5669	1149
chr11	60199097	Rai1	NM_009021	2.91478	7249	6722	6721	1052	1051	-98	527	5669	1149
chr11	60199097	Srebf1	NM_001358314	2.98449	4274	4158	4157	825	824	-13	116	3332	837
chr11	60199109	Rai1	NM_009021	2.92522	7261	6734	6733	1064	1063	-86	527	5669	1149
chr11	60199109	Srebf1	NM_001358314	2.97017	4262	4146	4145	813	812	-25	116	3332	837
chr11	60199115	Rai1	NM_009021	2.93043	7267	6740	6739	1070	1069	-80	527	5669	1149
chr11	60199115	Srebf1	NM_001358314	2.96301	4256	4140	4139	807	806	-31	116	3332	837
chr11	60199118	Rai1	NM_009021	2.93304	7270	6743	6742	1073	1072	-77	527	5669	1149
chr11	60199118	Srebf1	NM_001358314	2.95943	4253	4137	4136	804	803	-34	116	3332	837
chr11	60554472	Alkbh5	NM_172943	2.01391	1984	1245	1244	57	56	-4040	739	1187	4096
chr11	60554477	Alkbh5	NM_172943	2.01513	1989	1250	1249	62	61	-4035	739	1187	4096
chr11	60554490	Alkbh5	NM_172943	2.01831	2002	1263	1262	75	74	-4022	739	1187	4096
chr11	60554499	Alkbh5	NM_172943	2.0205	2011	1272	1271	84	83	-4013	739	1187	4096
chr11	60554502	Alkbh5	NM_172943	2.02124	2014	1275	1274	87	86	-4010	739	1187	4096
chr11	60554510	Alkbh5	NM_172943	2.02319	2022	1283	1282	95	94	-4002	739	1187	4096
chr11	60554518	Alkbh5	NM_172943	2.02514	2030	1291	1290	103	102	-3994	739	1187	4096
chr11	60554528	Alkbh5	NM_172943	2.02758	2040	1301	1300	113	112	-3984	739	1187	4096
chr11	60554540	Alkbh5	NM_172943	2.03051	2052	1313	1312	125	124	-3972	739	1187	4096
chr11	60554582	Alkbh5	NM_172943	2.04076	2094	1355	1354	167	166	-3930	739	1187	4096
chr11	60554634	Alkbh5	NM_172943	2.05345	2146	1407	1406	219	218	-3878	739	1187	4096
chr11	60554688	Alkbh5	NM_172943	2.06663	2200	1461	1460	273	272	-3824	739	1187	4096
chr11	60554709	Alkbh5	NM_172943	2.07176	2221	1482	1481	294	293	-3803	739	1187	4096
chr11	60554716	Alkbh5	NM_172943	2.07347	2228	1489	1488	301	300	-3796	739	1187	4096
chr11	60554729	Alkbh5	NM_172943	2.07664	2241	1502	1501	314	313	-3783	739	1187	4096
chr11	60554737	Alkbh5	NM_172943	2.07859	2249	1510	1509	322	321	-3775	739	1187	4096
chr11	60554761	Alkbh5	NM_172943	2.08445	2273	1534	1533	346	345	-3751	739	1187	4096
chr11	60554925	Alkbh5	NM_172943	2.12448	2437	1698	1697	510	509	-3587	739	1187	4096
chr11	60554993	Alkbh5	NM_172943	2.14108	2505	1766	1765	578	577	-3519	739	1187	4096
chr11	60555107	Alkbh5	NM_172943	2.1689	2619	1880	1879	692	691	-3405	739	1187	4096
chr11	60555138	Alkbh5	NM_172943	2.17647	2650	1911	1910	723	722	-3374	739	1187	4096
chr11	60555173	Alkbh5	NM_172943	2.18501	2685	1946	1945	758	757	-3339	739	1187	4096
chr11	60555211	Alkbh5	NM_172943	2.19429	2723	1984	1983	796	795	-3301	739	1187	4096
chr11	60555218	Alkbh5	NM_172943	2.196	2730	1991	1990	803	802	-3294	739	1187	4096
chr11	60555246	Alkbh5	NM_172943	2.20283	2758	2019	2018	831	830	-3266	739	1187	4096
chr11	60555251	Alkbh5	NM_172943	2.20405	2763	2024	2023	836	835	-3261	739	1187	4096
chr11	60555259	Alkbh5	NM_172943	2.206	2771	2032	2031	844	843	-3253	739	1187	4096
chr11	60555297	Alkbh5	NM_172943	2.21528	2809	2070	2069	882	881	-3215	739	1187	4096
chr11	60555678	Alkbh5	NM_172943	2.30827	3190	2451	2450	1263	1262	-2834	739	1187	4096
chr11	60555772	Alkbh5	NM_172943	2.33122	3284	2545	2544	1357	1356	-2740	739	1187	4096
chr11	60555786	Alkbh5	NM_172943	2.33464	3298	2559	2558	1371	1370	-2726	739	1187	4096
chr11	60555791	Alkbh5	NM_172943	2.33586	3303	2564	2563	1376	1375	-2721	739	1187	4096
chr11	60555796	Alkbh5	NM_172943	2.33708	3308	2569	2568	1381	1380	-2716	739	1187	4096
chr11	60555803	Alkbh5	NM_172943	2.33878	3315	2576	2575	1388	1387	-2709	739	1187	4096
chr11	60555808	Alkbh5	NM_172943	2.34	3320	2581	2580	1393	1392	-2704	739	1187	4096
chr11	60714088	Llgl1	NM_001159404	2.91251	4324	4154	4153	1043	1042	-100	170	3110	1142
chr11	60714122	Llgl1	NM_001159404	2.94226	4358	4188	4187	1077	1076	-66	170	3110	1142
chr11	60788952	Shmt1	NM_009171	2.77733	2009	1629	1628	192	191	-55	380	1436	246
chr11	60788963	Shmt1	NM_009171	2.73279	1998	1618	1617	181	180	-66	380	1436	246
chr11	60789026	Shmt1	NM_009171	2.47773	1935	1555	1554	118	117	-129	380	1436	246
chr11	61151905	Usp22	NM_001004143	2.9539	4317	4144	4143	2566	2565	-124	173	1577	2689
chr11	61151969	Usp22	NM_001004143	2.93011	4253	4080	4079	2502	2501	-188	173	1577	2689
chr11	61151972	Usp22	NM_001004143	2.929	4250	4077	4076	2499	2498	-191	173	1577	2689
chr11	61151974	Usp22	NM_001004143	2.92825	4248	4075	4074	2497	2496	-193	173	1577	2689
chr11	61151978	Usp22	NM_001004143	2.92677	4244	4071	4070	2493	2492	-197	173	1577	2689
chr11	61151980	Usp22	NM_001004143	2.92602	4242	4069	4068	2491	2490	-199	173	1577	2689
chr11	61151997	Usp22	NM_001004143	2.9197	4225	4052	4051	2474	2473	-216	173	1577	2689
chr11	61153113	Usp22	NM_001004143	2.50483	3109	2936	2935	1358	1357	-1332	173	1577	2689
chr11	61153433	Usp22	NM_001004143	2.38587	2789	2616	2615	1038	1037	-1652	173	1577	2689
chr11	61153506	Usp22	NM_001004143	2.35874	2716	2543	2542	965	964	-1725	173	1577	2689
chr11	61153513	Usp22	NM_001004143	2.35613	2709	2536	2535	958	957	-1732	173	1577	2689
chr11	61153926	Usp22	NM_001004143	2.2026	2296	2123	2122	545	544	-2145	173	1577	2689
chr11	61153928	Usp22	NM_001004143	2.20186	2294	2121	2120	543	542	-2147	173	1577	2689
chr11	61244933	Aldh3a2	NM_007437	2.88383	3011	2832	2831	1377	1376	-181	179	1454	1557
chr11	61244962	Aldh3a2	NM_007437	2.86521	2982	2803	2802	1348	1347	-210	179	1454	1557
chr11	61517813	Epn2	NM_001362587	2.45403	3788	3393	3392	1605	1604	-1930	395	1787	3534
chr11	61518808	Epn2	NM_001362587	2.17256	2793	2398	2397	610	609	-2925	395	1787	3534
chr11	61518814	Epn2	NM_001362587	2.17086	2787	2392	2391	604	603	-2931	395	1787	3534
chr11	61518840	Epn2	NM_001362587	2.16351	2761	2366	2365	578	577	-2957	395	1787	3534
chr11	61518855	Epn2	NM_001362587	2.15926	2746	2351	2350	563	562	-2972	395	1787	3534
chr11	61518865	Epn2	NM_001362587	2.15644	2736	2341	2340	553	552	-2982	395	1787	3534
chr11	61518871	Epn2	NM_001362587	2.15474	2730	2335	2334	547	546	-2988	395	1787	3534
chr11	61518877	Epn2	NM_001362587	2.15304	2724	2329	2328	541	540	-2994	395	1787	3534
chr11	61518892	Epn2	NM_001362587	2.1488	2709	2314	2313	526	525	-3009	395	1787	3534
chr11	62314163	Ttc19	NM_028360	2.00877	1157	1118	1117	20	19	-2261	39	1097	2280
chr11	62314267	Ttc19	NM_028360	2.05436	1261	1222	1221	124	123	-2157	39	1097	2280
chr11	62315212	Ttc19	NM_028360	2.46865	2206	2167	2166	1069	1068	-1212	39	1097	2280
chr11	62553151	Ubb	NM_011664	2.58667	1436	1006	1005	88	87	-62	430	917	149
chr11	62666218	Mmgt2	NM_175002	2.87845	1741	1391	1390	1019	1018	-141	350	371	1159
chr11	62711542	Zfp287	NM_133208	2.9758	4964	4538	4537	2258	2257	-56	426	2279	2313
chr11	65002070	Arhgap44	NM_175003	2.97871	4042	3720	3719	1425	1424	-31	322	2294	1455
chr11	65002070	Elac2	NM_001362983	2.99527	3392	3317	3316	842	841	-4	75	2474	845
chr11	65002363	Arhgap44	NM_175003	2.77747	3749	3427	3426	1132	1131	-324	322	2294	1455
chr11	68821637	Ndel1	NM_023668	2.83037	2178	1973	1972	935	934	-191	205	1037	1125
chr11	68821648	Ndel1	NM_023668	2.8206	2167	1962	1961	924	923	-202	205	1037	1125
chr11	68985774	Pfas	NM_001159519	2.96773	6295	6203	6202	2189	2188	-73	92	4013	2261
chr11	68987252	Pfas	NM_001159519	2.31432	4817	4725	4724	711	710	-1551	92	4013	2261
chr11	69109918	Per1	NM_011065	2.93478	4627	4435	4434	559	558	-39	192	3875	597
chr11	69109928	Per1	NM_011065	2.95151	4637	4445	4444	569	568	-29	192	3875	597
chr11	69332616	Kcnab3	NM_010599	2.52673	2111	1688	1687	473	472	-425	423	1214	897
chr11	69667342	Eif4a1	NM_144958	2.24395	1473	1352	1351	131	130	-406	121	1220	536
chr11	69667348	Eif4a1	NM_144958	2.23277	1467	1346	1345	125	124	-412	121	1220	536
chr11	69667363	Eif4a1	NM_144958	2.20484	1452	1331	1330	110	109	-427	121	1220	536
chr11	69667369	Eif4a1	NM_144958	2.19367	1446	1325	1324	104	103	-433	121	1220	536
chr11	69917221	Eif5a	NM_001166595	2.20593	706	597	596	132	131	-509	109	464	640
chr11	69917238	Eif5a	NM_001166595	2.17941	689	580	579	115	114	-526	109	464	640
chr11	69917249	Eif5a	NM_001166595	2.16225	678	569	568	104	103	-537	109	464	640
chr11	69999825	Phf23	NM_001291125	2.66726	1631	1378	1377	373	372	-186	253	1004	558
chr11	70009641	Dvl2	NM_007888	2.09478	2500	2260	2259	49	48	-468	240	2210	516
chr11	70009778	Dvl2	NM_007888	2.35977	2637	2397	2396	186	185	-331	240	2210	516
chr11	70009864	Dvl2	NM_007888	2.52611	2723	2483	2482	272	271	-245	240	2210	516
chr11	70224837	Bcl6b	NM_007528	2.62632	2715	2615	2614	1190	1189	-710	100	1424	1899
chr11	70225448	Bcl6b	NM_007528	2.30474	2104	2004	2003	579	578	-1321	100	1424	1899
chr11	70225464	Bcl6b	NM_007528	2.29632	2088	1988	1987	563	562	-1337	100	1424	1899
chr11	70225708	Bcl6b	NM_007528	2.16789	1844	1744	1743	319	318	-1581	100	1424	1899
chr11	70651376	Rnf167	NM_027445	2.81	1839	1206	1205	162	161	-38	633	1043	199
chr11	70651885	Pfn1	NM_011072	2.86282	831	662	661	239	238	-38	169	422	276
chr11	70652051	Pfn1	NM_011072	2.26354	665	496	495	73	72	-204	169	422	276
chr11	70729383	Kif1c	NM_153103	2.16305	4176	3807	3806	504	503	-2587	369	3302	3090
chr11	70729464	Kif1c	NM_153103	2.18926	4257	3888	3887	585	584	-2506	369	3302	3090
chr11	70940878	Rabep1	NM_001291143	2.15065	3268	2732	2731	395	394	-2227	536	2336	2621
chr11	70943127	Nup88	NM_172394	2.65672	2382	2361	2360	132	131	-69	21	2228	200
chr11	70943133	Nup88	NM_172394	2.62687	2376	2355	2354	126	125	-75	21	2228	200
chr11	72211755	Med31	NM_026068	2.80745	1129	526	525	130	129	-31	603	395	160
chr11	72684054	Ube2g1	NM_025985	2.18965	1409	1081	1080	568	567	-2427	328	512	2994
chr11	72684305	Ube2g1	NM_025985	2.27346	1660	1332	1331	819	818	-2176	328	512	2994
chr11	72768865	Ankfy1	NM_009671	2.27105	4752	4730	4729	1220	1219	-3281	22	3509	4500
chr11	73176259	Emc6	NM_001168470	2.12903	645	445	444	112	111	-756	200	332	867
chr11	73183649	Ctns	NM_001357891	2.95991	2670	2373	2372	1269	1268	-53	297	1103	1321
chr11	73183656	Ctns	NM_001357891	2.95461	2663	2366	2365	1262	1261	-60	297	1103	1321
chr11	74908661	Tsr1	NM_177325	2.27302	2705	2667	2666	255	254	-679	38	2411	933
chr11	75163761	Smg6	NM_001002764	2.54139	5129	5068	5067	811	810	-687	61	4256	1497
chr11	75300379	Rpa1	NM_026653	2.88528	2922	2798	2797	926	925	-120	124	1871	1045
chr11	75300392	Rpa1	NM_026653	2.87285	2909	2785	2784	913	912	-133	124	1871	1045
chr11	75300479	Rpa1	NM_026653	2.78967	2822	2698	2697	826	825	-220	124	1871	1045
chr11	75300824	Rpa1	NM_026653	2.45985	2477	2353	2352	481	480	-565	124	1871	1045
chr11	75300837	Rpa1	NM_026653	2.44742	2464	2340	2339	468	467	-578	124	1871	1045
chr11	75706035	Crk	NM_133656	2.51411	3611	3447	3446	2532	2531	-2393	164	914	4924
chr11	75764772	Ywhae	NM_009536	2.08554	1008	868	867	100	99	-1069	140	767	1168
chr11	75764826	Ywhae	NM_009536	2.13174	1062	922	921	154	153	-1015	140	767	1168
chr11	75764830	Ywhae	NM_009536	2.13516	1066	926	925	158	157	-1011	140	767	1168
chr11	75764851	Ywhae	NM_009536	2.15312	1087	947	946	179	178	-990	140	767	1168
chr11	75764892	Ywhae	NM_009536	2.1882	1128	988	987	220	219	-949	140	767	1168
chr11	75764920	Ywhae	NM_009536	2.21215	1156	1016	1015	248	247	-921	140	767	1168
chr11	75764945	Ywhae	NM_009536	2.23353	1181	1041	1040	273	272	-896	140	767	1168
chr11	75764976	Ywhae	NM_009536	2.26005	1212	1072	1071	304	303	-865	140	767	1168
chr11	75765039	Ywhae	NM_009536	2.31394	1275	1135	1134	367	366	-802	140	767	1168
chr11	75765124	Ywhae	NM_009536	2.38666	1360	1220	1219	452	451	-717	140	767	1168
chr11	75765132	Ywhae	NM_009536	2.3935	1368	1228	1227	460	459	-709	140	767	1168
chr11	75765142	Ywhae	NM_009536	2.40205	1378	1238	1237	470	469	-699	140	767	1168
chr11	75765155	Ywhae	NM_009536	2.41317	1391	1251	1250	483	482	-686	140	767	1168
chr11	75765167	Ywhae	NM_009536	2.42344	1403	1263	1262	495	494	-674	140	767	1168
chr11	75765174	Ywhae	NM_009536	2.42943	1410	1270	1269	502	501	-667	140	767	1168
chr11	75765187	Ywhae	NM_009536	2.44055	1423	1283	1282	515	514	-654	140	767	1168
chr11	75765198	Ywhae	NM_009536	2.44996	1434	1294	1293	526	525	-643	140	767	1168
chr11	75765201	Ywhae	NM_009536	2.45252	1437	1297	1296	529	528	-640	140	767	1168
chr11	75765210	Ywhae	NM_009536	2.46022	1446	1306	1305	538	537	-631	140	767	1168
chr11	75765228	Ywhae	NM_009536	2.47562	1464	1324	1323	556	555	-613	140	767	1168
chr11	75765276	Ywhae	NM_009536	2.51668	1512	1372	1371	604	603	-565	140	767	1168
chr11	75765318	Ywhae	NM_009536	2.55261	1554	1414	1413	646	645	-523	140	767	1168
chr11	75765328	Ywhae	NM_009536	2.56116	1564	1424	1423	656	655	-513	140	767	1168
chr11	75765365	Ywhae	NM_009536	2.59281	1601	1461	1460	693	692	-476	140	767	1168
chr11	75765375	Ywhae	NM_009536	2.60137	1611	1471	1470	703	702	-466	140	767	1168
chr11	75765413	Ywhae	NM_009536	2.63388	1649	1509	1508	741	740	-428	140	767	1168
chr11	75765513	Ywhae	NM_009536	2.71942	1749	1609	1608	841	840	-328	140	767	1168
chr11	75765532	Ywhae	NM_009536	2.73567	1768	1628	1627	860	859	-309	140	767	1168
chr11	75765539	Ywhae	NM_009536	2.74166	1775	1635	1634	867	866	-302	140	767	1168
chr11	75765545	Ywhae	NM_009536	2.74679	1781	1641	1640	873	872	-296	140	767	1168
chr11	75765815	Ywhae	NM_009536	2.97776	2051	1911	1910	1143	1142	-26	140	767	1168
chr11	77044945	Nsrp1	NM_001012309	2.54903	2462	2424	2423	795	794	-653	38	1628	1447
chr11	77045475	Nsrp1	NM_001012309	2.18301	1932	1894	1893	265	264	-1183	38	1628	1447
chr11	77045479	Nsrp1	NM_001012309	2.18025	1928	1890	1889	261	260	-1187	38	1628	1447
chr11	77456543	Ssh2	NM_001291190	2.22431	5498	5353	5352	1063	1062	-3676	145	4289	4738
chr11	77456562	Ssh2	NM_001291190	2.22832	5517	5372	5371	1082	1081	-3657	145	4289	4738
chr11	77456643	Ssh2	NM_001291190	2.24541	5598	5453	5452	1163	1162	-3576	145	4289	4738
chr11	77456686	Ssh2	NM_001291190	2.25448	5641	5496	5495	1206	1205	-3533	145	4289	4738
chr11	77456724	Ssh2	NM_001291190	2.2625	5679	5534	5533	1244	1243	-3495	145	4289	4738
chr11	77458978	Ssh2	NM_001291190	2.73813	7933	7788	7787	3498	3497	-1241	145	4289	4738
chr11	77458989	Ssh2	NM_001291190	2.74045	7944	7799	7798	3509	3508	-1230	145	4289	4738
chr11	77460186	Ssh2	NM_001291190	2.99304	9141	8996	8995	4706	4705	-33	145	4289	4738
chr11	77537635	Taok1	NM_144825	2.02665	3935	3238	3237	232	231	-8473	697	3005	8704
chr11	77710024	Nufip2	NM_001024205	2.03511	2456	2368	2367	289	288	-7942	88	2078	8230
chr11	77710033	Nufip2	NM_001024205	2.0362	2465	2377	2376	298	297	-7933	88	2078	8230
chr11	77710244	Nufip2	NM_001024205	2.06184	2676	2588	2587	509	508	-7722	88	2078	8230
chr11	77710250	Nufip2	NM_001024205	2.06257	2682	2594	2593	515	514	-7716	88	2078	8230
chr11	77710311	Nufip2	NM_001024205	2.06998	2743	2655	2654	576	575	-7655	88	2078	8230
chr11	77710328	Nufip2	NM_001024205	2.07204	2760	2672	2671	593	592	-7638	88	2078	8230
chr11	77710336	Nufip2	NM_001024205	2.07302	2768	2680	2679	601	600	-7630	88	2078	8230
chr11	77710341	Nufip2	NM_001024205	2.07362	2773	2685	2684	606	605	-7625	88	2078	8230
chr11	77710343	Nufip2	NM_001024205	2.07387	2775	2687	2686	608	607	-7623	88	2078	8230
chr11	77710424	Nufip2	NM_001024205	2.08371	2856	2768	2767	689	688	-7542	88	2078	8230
chr11	77710458	Nufip2	NM_001024205	2.08784	2890	2802	2801	723	722	-7508	88	2078	8230
chr11	77710477	Nufip2	NM_001024205	2.09015	2909	2821	2820	742	741	-7489	88	2078	8230
chr11	77710493	Nufip2	NM_001024205	2.09209	2925	2837	2836	758	757	-7473	88	2078	8230
chr11	77710507	Nufip2	NM_001024205	2.09379	2939	2851	2850	772	771	-7459	88	2078	8230
chr11	77710513	Nufip2	NM_001024205	2.09452	2945	2857	2856	778	777	-7453	88	2078	8230
chr11	77710521	Nufip2	NM_001024205	2.09549	2953	2865	2864	786	785	-7445	88	2078	8230
chr11	77710696	Nufip2	NM_001024205	2.11675	3128	3040	3039	961	960	-7270	88	2078	8230
chr11	77710730	Nufip2	NM_001024205	2.12088	3162	3074	3073	995	994	-7236	88	2078	8230
chr11	77710732	Nufip2	NM_001024205	2.12113	3164	3076	3075	997	996	-7234	88	2078	8230
chr11	77710736	Nufip2	NM_001024205	2.12161	3168	3080	3079	1001	1000	-7230	88	2078	8230
chr11	77710742	Nufip2	NM_001024205	2.12234	3174	3086	3085	1007	1006	-7224	88	2078	8230
chr11	77710745	Nufip2	NM_001024205	2.12271	3177	3089	3088	1010	1009	-7221	88	2078	8230
chr11	77710794	Nufip2	NM_001024205	2.12866	3226	3138	3137	1059	1058	-7172	88	2078	8230
chr11	77710997	Nufip2	NM_001024205	2.15332	3429	3341	3340	1262	1261	-6969	88	2078	8230
chr11	77711477	Nufip2	NM_001024205	2.21164	3909	3821	3820	1742	1741	-6489	88	2078	8230
chr11	77711682	Nufip2	NM_001024205	2.23654	4114	4026	4025	1947	1946	-6284	88	2078	8230
chr11	78155379	Fam222b	NM_001364110	2.03733	2016	1765	1764	76	75	-1960	251	1688	2035
chr11	78156080	Fam222b	NM_001364110	2.38163	2717	2466	2465	777	776	-1259	251	1688	2035
chr11	78156218	Fam222b	NM_001364110	2.44941	2855	2604	2603	915	914	-1121	251	1688	2035
chr11	78156461	Fam222b	NM_001364110	2.56876	3098	2847	2846	1158	1157	-878	251	1688	2035
chr11	78156646	Fam222b	NM_001364110	2.65963	3283	3032	3031	1343	1342	-693	251	1688	2035
chr11	78156648	Fam222b	NM_001364110	2.66061	3285	3034	3033	1345	1344	-691	251	1688	2035
chr11	78156655	Fam222b	NM_001364110	2.66405	3292	3041	3040	1352	1351	-684	251	1688	2035
chr11	78156668	Fam222b	NM_001364110	2.67043	3305	3054	3053	1365	1364	-671	251	1688	2035
chr11	78156675	Fam222b	NM_001364110	2.67387	3312	3061	3060	1372	1371	-664	251	1688	2035
chr11	78349129	Unc119	NM_001313988	2.93282	1087	924	923	486	485	-35	163	437	520
chr11	78507122	Tmem199	NM_199199	2.89771	1275	1215	1214	588	587	-67	60	626	654
chr11	78507139	Tmem199	NM_199199	2.87176	1258	1198	1197	571	570	-84	60	626	654
chr11	78507147	Tmem199	NM_199199	2.85954	1250	1190	1189	563	562	-92	60	626	654
chr11	78507193	Tmem199	NM_199199	2.78931	1204	1144	1143	517	516	-138	60	626	654
chr11	78524834	Tnfaip1	NM_001159392	2.19185	1711	1422	1421	471	470	-1984	289	950	2454
chr11	79239417	Wsb1	NM_019653	2.962	2454	2152	2151	886	885	-35	302	1265	920
chr11	79693231	Rab11fip4	NM_175543	2.33419	2363	2300	2299	392	391	-781	63	1907	1172
chr11	80032256	Suz12	NM_199196	2.03414	2505	2292	2291	66	65	-1867	213	2225	1932
chr11	80032272	Suz12	NM_199196	2.04242	2521	2308	2307	82	81	-1851	213	2225	1932
chr11	80032307	Suz12	NM_199196	2.06053	2556	2343	2342	117	116	-1816	213	2225	1932
chr11	80032422	Suz12	NM_199196	2.12002	2671	2458	2457	232	231	-1701	213	2225	1932
chr11	80032425	Suz12	NM_199196	2.12157	2674	2461	2460	235	234	-1698	213	2225	1932
chr11	80032441	Suz12	NM_199196	2.12985	2690	2477	2476	251	250	-1682	213	2225	1932
chr11	80032480	Suz12	NM_199196	2.15003	2729	2516	2515	290	289	-1643	213	2225	1932
chr11	80032493	Suz12	NM_199196	2.15675	2742	2529	2528	303	302	-1630	213	2225	1932
chr11	80032506	Suz12	NM_199196	2.16348	2755	2542	2541	316	315	-1617	213	2225	1932
chr11	80032518	Suz12	NM_199196	2.16968	2767	2554	2553	328	327	-1605	213	2225	1932
chr11	80032582	Suz12	NM_199196	2.20279	2831	2618	2617	392	391	-1541	213	2225	1932
chr11	80032718	Suz12	NM_199196	2.27315	2967	2754	2753	528	527	-1405	213	2225	1932
chr11	80032897	Suz12	NM_199196	2.36575	3146	2933	2932	707	706	-1226	213	2225	1932
chr11	80033046	Suz12	NM_199196	2.44283	3295	3082	3081	856	855	-1077	213	2225	1932
chr11	80033199	Suz12	NM_199196	2.52199	3448	3235	3234	1009	1008	-924	213	2225	1932
chr11	80033372	Suz12	NM_199196	2.61148	3621	3408	3407	1182	1181	-751	213	2225	1932
chr11	80033511	Suz12	NM_199196	2.68339	3760	3547	3546	1321	1320	-612	213	2225	1932
chr11	80033564	Suz12	NM_199196	2.71081	3813	3600	3599	1374	1373	-559	213	2225	1932
chr11	80033767	Suz12	NM_199196	2.81583	4016	3803	3802	1577	1576	-356	213	2225	1932
chr11	80033868	Suz12	NM_199196	2.86808	4117	3904	3903	1678	1677	-255	213	2225	1932
chr11	80033871	Suz12	NM_199196	2.86963	4120	3907	3906	1681	1680	-252	213	2225	1932
chr11	80033909	Suz12	NM_199196	2.88929	4158	3945	3944	1719	1718	-214	213	2225	1932
chr11	80033914	Suz12	NM_199196	2.89188	4163	3950	3949	1724	1723	-209	213	2225	1932
chr11	80033916	Suz12	NM_199196	2.89291	4165	3952	3951	1726	1725	-207	213	2225	1932
chr11	80034024	Suz12	NM_199196	2.94878	4273	4060	4059	1834	1833	-99	213	2225	1932
chr11	80034060	Suz12	NM_199196	2.96741	4309	4096	4095	1870	1869	-63	213	2225	1932
chr11	80034089	Suz12	NM_199196	2.98241	4338	4125	4124	1899	1898	-34	213	2225	1932
chr11	80046550	Crlf3	NM_018776	2.94231	2338	2260	2259	931	930	-57	78	1328	987
chr11	80046557	Crlf3	NM_018776	2.93522	2331	2253	2252	924	923	-64	78	1328	987
chr11	80046696	Crlf3	NM_018776	2.79453	2192	2114	2113	785	784	-203	78	1328	987
chr11	80046704	Crlf3	NM_018776	2.78644	2184	2106	2105	777	776	-211	78	1328	987
chr11	80046779	Crlf3	NM_018776	2.71053	2109	2031	2030	702	701	-286	78	1328	987
chr11	80046887	Crlf3	NM_018776	2.60121	2001	1923	1922	594	593	-394	78	1328	987
chr11	80395776	Zfp207	NM_001130171	2.32378	1796	1621	1620	226	225	-472	175	1394	697
chr11	80395783	Zfp207	NM_001130171	2.33381	1803	1628	1627	233	232	-465	175	1394	697
chr11	80396026	Zfp207	NM_001130171	2.68195	2046	1871	1870	476	475	-222	175	1394	697
chr11	80396063	Zfp207	NM_001130171	2.73496	2083	1908	1907	513	512	-185	175	1394	697
chr11	82803850	Lig3	NM_001291245	2.84638	5542	5375	5374	2336	2335	-424	167	3038	2759
chr11	82803850	Rffl	NM_001007465	2.98584	3460	3250	3249	2158	2157	-31	210	1091	2188
chr11	82803863	Lig3	NM_001291245	2.85109	5555	5388	5387	2349	2348	-411	167	3038	2759
chr11	82803863	Rffl	NM_001007465	2.9799	3447	3237	3236	2145	2144	-44	210	1091	2188
chr11	82803895	Lig3	NM_001291245	2.86268	5587	5420	5419	2381	2380	-379	167	3038	2759
chr11	82803895	Rffl	NM_001007465	2.96528	3415	3205	3204	2113	2112	-76	210	1091	2188
chr11	82804013	Lig3	NM_001291245	2.90543	5705	5538	5537	2499	2498	-261	167	3038	2759
chr11	82804013	Rffl	NM_001007465	2.91138	3297	3087	3086	1995	1994	-194	210	1091	2188
chr11	83782513	Heatr6	NM_145432	2.38927	4431	4346	4345	791	790	-1241	85	3554	2031
chr11	84048072	Dusp14	NM_019819	2.9528	1415	1142	1141	545	544	-27	273	596	571
chr11	84048157	Dusp14	NM_019819	2.8042	1330	1057	1056	460	459	-112	273	596	571
chr11	84048238	Dusp14	NM_019819	2.66259	1249	976	975	379	378	-193	273	596	571
chr11	84832818	Ggnbp2	NM_001364115	2.29584	2538	2283	2282	192	191	-457	255	2090	648
chr11	84876370	Pigw	NM_001077636	2.91581	2200	2132	2131	620	619	-57	68	1511	676
chr11	84985366	Usp32	NM_001029934	2.54318	6045	5859	5858	1044	1043	-878	186	4814	1921
chr11	85191374	Appbp2	NM_025825	2.80952	2340	2030	2029	272	271	-64	310	1757	335
chr11	85191378	Appbp2	NM_025825	2.79762	2336	2026	2025	268	267	-68	310	1757	335
chr11	86496083	Rnft1	NM_029788	2.04194	1509	1316	1315	128	127	-2924	193	1187	3051
chr11	86496316	Rnft1	NM_029788	2.11828	1742	1549	1548	361	360	-2691	193	1187	3051
chr11	86584856	Vmp1	NM_029478	2.43212	1959	1673	1672	452	451	-594	286	1220	1045
chr11	86584940	Vmp1	NM_029478	2.35182	1875	1589	1588	368	367	-678	286	1220	1045
chr11	86585166	Vmp1	NM_029478	2.13576	1649	1363	1362	142	141	-904	286	1220	1045
chr11	86585178	Vmp1	NM_029478	2.12428	1637	1351	1350	130	129	-916	286	1220	1045
chr11	86585299	Vmp1	NM_029478	2.0086	1516	1230	1229	9	8	-1037	286	1220	1045
chr11	86694708	Cltc	NM_001003908	2.70792	6163	5886	5885	858	857	-354	277	5027	1211
chr11	86694771	Cltc	NM_001003908	2.65594	6100	5823	5822	795	794	-417	277	5027	1211
chr11	86694820	Cltc	NM_001003908	2.61551	6051	5774	5773	746	745	-466	277	5027	1211
chr11	86695263	Cltc	NM_001003908	2.25	5608	5331	5330	303	302	-909	277	5027	1211
chr11	86695369	Cltc	NM_001003908	2.16254	5502	5225	5224	197	196	-1015	277	5027	1211
chr11	86695505	Cltc	NM_001003908	2.05033	5366	5089	5088	61	60	-1151	277	5027	1211
chr11	87034951	Gdpd1	NM_025638	2.16099	1326	1167	1166	222	221	-1157	159	944	1378
chr11	87077885	Smg8	NM_024262	2.30769	3067	3044	3043	68	67	-153	23	2975	220
chr11	87555624	Tex14	NM_001199293	2.34323	4582	4493	4492	104	103	-199	89	4388	302
chr11	87658075	Hsf5	NM_001045527	2.32552	2690	2583	2582	708	707	-1467	107	1874	2174
chr11	87979612	Dynll2	NM_026556	2.9544	2388	2091	2090	1821	1820	-87	297	269	1907
chr11	87979624	Dynll2	NM_026556	2.94811	2376	2079	2078	1809	1808	-99	297	269	1907
chr11	87979692	Dynll2	NM_026556	2.91247	2308	2011	2010	1741	1740	-167	297	269	1907
chr11	87979737	Dynll2	NM_026556	2.88889	2263	1966	1965	1696	1695	-212	297	269	1907
chr11	87979747	Dynll2	NM_026556	2.88365	2253	1956	1955	1686	1685	-222	297	269	1907
chr11	87980419	Dynll2	NM_026556	2.53145	1581	1284	1283	1014	1013	-894	297	269	1907
chr11	87980489	Dynll2	NM_026556	2.49476	1511	1214	1213	944	943	-964	297	269	1907
chr11	87980858	Dynll2	NM_026556	2.30136	1142	845	844	575	574	-1333	297	269	1907
chr11	87981256	Dynll2	NM_026556	2.09277	744	447	446	177	176	-1731	297	269	1907
chr11	88049462	Srsf1	NM_173374	1.80723	1068	603	602	-144	-145	-4295	465	746	4150
chr11	88049624	Srsf1	NM_173374	2.00434	1230	765	764	18	17	-4133	465	746	4150
chr11	88049639	Srsf1	NM_173374	2.00795	1245	780	779	33	32	-4118	465	746	4150
chr11	88049649	Srsf1	NM_173374	2.01036	1255	790	789	43	42	-4108	465	746	4150
chr11	88049656	Srsf1	NM_173374	2.01205	1262	797	796	50	49	-4101	465	746	4150
chr11	88049673	Srsf1	NM_173374	2.01614	1279	814	813	67	66	-4084	465	746	4150
chr11	88049679	Srsf1	NM_173374	2.01759	1285	820	819	73	72	-4078	465	746	4150
chr11	88049681	Srsf1	NM_173374	2.01807	1287	822	821	75	74	-4076	465	746	4150
chr11	88049686	Srsf1	NM_173374	2.01927	1292	827	826	80	79	-4071	465	746	4150
chr11	88049695	Srsf1	NM_173374	2.02144	1301	836	835	89	88	-4062	465	746	4150
chr11	88049700	Srsf1	NM_173374	2.02265	1306	841	840	94	93	-4057	465	746	4150
chr11	88049761	Srsf1	NM_173374	2.03734	1367	902	901	155	154	-3996	465	746	4150
chr11	88049792	Srsf1	NM_173374	2.04481	1398	933	932	186	185	-3965	465	746	4150
chr11	88049820	Srsf1	NM_173374	2.05155	1426	961	960	214	213	-3937	465	746	4150
chr11	88049826	Srsf1	NM_173374	2.053	1432	967	966	220	219	-3931	465	746	4150
chr11	88049830	Srsf1	NM_173374	2.05396	1436	971	970	224	223	-3927	465	746	4150
chr11	88049835	Srsf1	NM_173374	2.05517	1441	976	975	229	228	-3922	465	746	4150
chr11	88049860	Srsf1	NM_173374	2.06119	1466	1001	1000	254	253	-3897	465	746	4150
chr11	88049885	Srsf1	NM_173374	2.06721	1491	1026	1025	279	278	-3872	465	746	4150
chr11	88049902	Srsf1	NM_173374	2.07131	1508	1043	1042	296	295	-3855	465	746	4150
chr11	88049912	Srsf1	NM_173374	2.07372	1518	1053	1052	306	305	-3845	465	746	4150
chr11	88049918	Srsf1	NM_173374	2.07516	1524	1059	1058	312	311	-3839	465	746	4150
chr11	88049920	Srsf1	NM_173374	2.07564	1526	1061	1060	314	313	-3837	465	746	4150
chr11	88049924	Srsf1	NM_173374	2.07661	1530	1065	1064	318	317	-3833	465	746	4150
chr11	88049928	Srsf1	NM_173374	2.07757	1534	1069	1068	322	321	-3829	465	746	4150
chr11	88049938	Srsf1	NM_173374	2.07998	1544	1079	1078	332	331	-3819	465	746	4150
chr11	88049940	Srsf1	NM_173374	2.08046	1546	1081	1080	334	333	-3817	465	746	4150
chr11	88049946	Srsf1	NM_173374	2.08191	1552	1087	1086	340	339	-3811	465	746	4150
chr11	88049948	Srsf1	NM_173374	2.08239	1554	1089	1088	342	341	-3809	465	746	4150
chr11	88049951	Srsf1	NM_173374	2.08311	1557	1092	1091	345	344	-3806	465	746	4150
chr11	88049957	Srsf1	NM_173374	2.08456	1563	1098	1097	351	350	-3800	465	746	4150
chr11	88049967	Srsf1	NM_173374	2.08697	1573	1108	1107	361	360	-3790	465	746	4150
chr11	88050006	Srsf1	NM_173374	2.09636	1612	1147	1146	400	399	-3751	465	746	4150
chr11	88050013	Srsf1	NM_173374	2.09805	1619	1154	1153	407	406	-3744	465	746	4150
chr11	88050041	Srsf1	NM_173374	2.10479	1647	1182	1181	435	434	-3716	465	746	4150
chr11	88050170	Srsf1	NM_173374	2.13587	1776	1311	1310	564	563	-3587	465	746	4150
chr11	88050172	Srsf1	NM_173374	2.13635	1778	1313	1312	566	565	-3585	465	746	4150
chr11	88050207	Srsf1	NM_173374	2.14478	1813	1348	1347	601	600	-3550	465	746	4150
chr11	88050236	Srsf1	NM_173374	2.15177	1842	1377	1376	630	629	-3521	465	746	4150
chr11	88050284	Srsf1	NM_173374	2.16333	1890	1425	1424	678	677	-3473	465	746	4150
chr11	88050300	Srsf1	NM_173374	2.16719	1906	1441	1440	694	693	-3457	465	746	4150
chr11	88050306	Srsf1	NM_173374	2.16863	1912	1447	1446	700	699	-3451	465	746	4150
chr11	88050358	Srsf1	NM_173374	2.18116	1964	1499	1498	752	751	-3399	465	746	4150
chr11	88050481	Srsf1	NM_173374	2.21079	2087	1622	1621	875	874	-3276	465	746	4150
chr11	88050493	Srsf1	NM_173374	2.21368	2099	1634	1633	887	886	-3264	465	746	4150
chr11	88050605	Srsf1	NM_173374	2.24066	2211	1746	1745	999	998	-3152	465	746	4150
chr11	88050622	Srsf1	NM_173374	2.24476	2228	1763	1762	1016	1015	-3135	465	746	4150
chr11	88050799	Srsf1	NM_173374	2.2874	2405	1940	1939	1193	1192	-2958	465	746	4150
chr11	88050807	Srsf1	NM_173374	2.28933	2413	1948	1947	1201	1200	-2950	465	746	4150
chr11	88050815	Srsf1	NM_173374	2.29126	2421	1956	1955	1209	1208	-2942	465	746	4150
chr11	88050961	Srsf1	NM_173374	2.32643	2567	2102	2101	1355	1354	-2796	465	746	4150
chr11	88050970	Srsf1	NM_173374	2.3286	2576	2111	2110	1364	1363	-2787	465	746	4150
chr11	88051143	Srsf1	NM_173374	2.37027	2749	2284	2283	1537	1536	-2614	465	746	4150
chr11	88051160	Srsf1	NM_173374	2.37437	2766	2301	2300	1554	1553	-2597	465	746	4150
chr11	88051204	Srsf1	NM_173374	2.38497	2810	2345	2344	1598	1597	-2553	465	746	4150
chr11	88051340	Srsf1	NM_173374	2.41773	2946	2481	2480	1734	1733	-2417	465	746	4150
chr11	88051365	Srsf1	NM_173374	2.42375	2971	2506	2505	1759	1758	-2392	465	746	4150
chr11	88051391	Srsf1	NM_173374	2.43002	2997	2532	2531	1785	1784	-2366	465	746	4150
chr11	88051398	Srsf1	NM_173374	2.4317	3004	2539	2538	1792	1791	-2359	465	746	4150
chr11	88051437	Srsf1	NM_173374	2.4411	3043	2578	2577	1831	1830	-2320	465	746	4150
chr11	88051579	Srsf1	NM_173374	2.47531	3185	2720	2719	1973	1972	-2178	465	746	4150
chr11	88082774	Vezf1	NM_016686	2.32679	2627	2506	2505	949	948	-1955	121	1556	2903
chr11	88083652	Vezf1	NM_016686	2.62913	3505	3384	3383	1827	1826	-1077	121	1556	2903
chr11	88210875	Mrps23	NM_001291272	2.15054	794	589	588	112	111	-632	205	476	743
chr11	88341458	Msi2	NM_001363195	2.60904	4397	4221	4220	3234	3233	-2076	176	986	5309
chr11	88341627	Msi2	NM_001363195	2.57721	4228	4052	4051	3065	3064	-2245	176	986	5309
chr11	88341672	Msi2	NM_001363195	2.56874	4183	4007	4006	3020	3019	-2290	176	986	5309
chr11	88342410	Msi2	NM_001363195	2.42976	3445	3269	3268	2282	2281	-3028	176	986	5309
chr11	88342418	Msi2	NM_001363195	2.42825	3437	3261	3260	2274	2273	-3036	176	986	5309
chr11	88342423	Msi2	NM_001363195	2.42731	3432	3256	3255	2269	2268	-3041	176	986	5309
chr11	88342427	Msi2	NM_001363195	2.42655	3428	3252	3251	2265	2264	-3045	176	986	5309
chr11	88342435	Msi2	NM_001363195	2.42505	3420	3244	3243	2257	2256	-3053	176	986	5309
chr11	88342511	Msi2	NM_001363195	2.41073	3344	3168	3167	2181	2180	-3129	176	986	5309
chr11	88342711	Msi2	NM_001363195	2.37307	3144	2968	2967	1981	1980	-3329	176	986	5309
chr11	88342769	Msi2	NM_001363195	2.36215	3086	2910	2909	1923	1922	-3387	176	986	5309
chr11	88342981	Msi2	NM_001363195	2.32222	2874	2698	2697	1711	1710	-3599	176	986	5309
chr11	88343565	Msi2	NM_001363195	2.21224	2290	2114	2113	1127	1126	-4183	176	986	5309
chr11	88343811	Msi2	NM_001363195	2.16591	2044	1868	1867	881	880	-4429	176	986	5309
chr11	88343860	Msi2	NM_001363195	2.15669	1995	1819	1818	832	831	-4478	176	986	5309
chr11	88343874	Msi2	NM_001363195	2.15405	1981	1805	1804	818	817	-4492	176	986	5309
chr11	88343877	Msi2	NM_001363195	2.15348	1978	1802	1801	815	814	-4495	176	986	5309
chr11	88343884	Msi2	NM_001363195	2.15217	1971	1795	1794	808	807	-4502	176	986	5309
chr11	88343944	Msi2	NM_001363195	2.14087	1911	1735	1734	748	747	-4562	176	986	5309
chr11	88344010	Msi2	NM_001363195	2.12844	1845	1669	1668	682	681	-4628	176	986	5309
chr11	88344015	Msi2	NM_001363195	2.1275	1840	1664	1663	677	676	-4633	176	986	5309
chr11	88344139	Msi2	NM_001363195	2.10414	1716	1540	1539	553	552	-4757	176	986	5309
chr11	88344158	Msi2	NM_001363195	2.10056	1697	1521	1520	534	533	-4776	176	986	5309
chr11	88344205	Msi2	NM_001363195	2.09171	1650	1474	1473	487	486	-4823	176	986	5309
chr11	88344214	Msi2	NM_001363195	2.09002	1641	1465	1464	478	477	-4832	176	986	5309
chr11	88344225	Msi2	NM_001363195	2.08795	1630	1454	1453	467	466	-4843	176	986	5309
chr11	88344246	Msi2	NM_001363195	2.08399	1609	1433	1432	446	445	-4864	176	986	5309
chr11	88344293	Msi2	NM_001363195	2.07514	1562	1386	1385	399	398	-4911	176	986	5309
chr11	88344295	Msi2	NM_001363195	2.07476	1560	1384	1383	397	396	-4913	176	986	5309
chr11	88344357	Msi2	NM_001363195	2.06309	1498	1322	1321	335	334	-4975	176	986	5309
chr11	88344390	Msi2	NM_001363195	2.05687	1465	1289	1288	302	301	-5008	176	986	5309
chr11	88344433	Msi2	NM_001363195	2.04878	1422	1246	1245	259	258	-5051	176	986	5309
chr11	88344518	Msi2	NM_001363195	2.03277	1337	1161	1160	174	173	-5136	176	986	5309
chr11	89016986	Trim25	NM_009546	2.07419	2255	2170	2169	265	264	-3307	85	1904	3571
chr11	89038387	Dgke	NM_019505	2.42229	4402	4040	4039	2345	2344	-3208	362	1694	5552
chr11	90644802	Cox11	NM_199008	2.17544	1083	1078	1077	250	249	-1175	5	827	1424
chr11	93944066	Mbtd1	NM_001346525	2.11478	2575	2248	2247	379	378	-2923	327	1868	3301
chr11	93945380	Mbtd1	NM_001346525	2.51272	3889	3562	3561	1693	1692	-1609	327	1868	3301
chr11	93959267	Nme1	NM_008704	2.27389	892	588	587	129	128	-342	304	458	470
chr11	94291208	Luc7l3	NM_001361575	2.74954	1877	1703	1702	404	403	-135	174	1298	538
chr11	95274425	Kat7	NM_001195003	2.34605	3393	3197	3196	1361	1360	-2572	196	1835	3932
chr11	95274435	Kat7	NM_001195003	2.3435	3383	3187	3186	1351	1350	-2582	196	1835	3932
chr11	95381765	Fam117a	NM_172543	2.8828	2209	2162	2161	806	805	-107	47	1355	912
chr11	95381771	Fam117a	NM_172543	2.88938	2215	2168	2167	812	811	-101	47	1355	912
chr11	95381779	Fam117a	NM_172543	2.89814	2223	2176	2175	820	819	-93	47	1355	912
chr11	95381792	Fam117a	NM_172543	2.91238	2236	2189	2188	833	832	-80	47	1355	912
chr11	95381800	Fam117a	NM_172543	2.92114	2244	2197	2196	841	840	-72	47	1355	912
chr11	95381809	Fam117a	NM_172543	2.931	2253	2206	2205	850	849	-63	47	1355	912
chr11	95381841	Fam117a	NM_172543	2.96605	2285	2238	2237	882	881	-31	47	1355	912
chr11	96048524	Ube2z	NM_172300	2.61145	2880	2791	2790	1720	1719	-1093	89	1070	2812
chr11	96048609	Ube2z	NM_172300	2.58123	2795	2706	2705	1635	1634	-1178	89	1070	2812
chr11	96049230	Ube2z	NM_172300	2.36047	2174	2085	2084	1014	1013	-1799	89	1070	2812
chr11	96049342	Ube2z	NM_172300	2.32065	2062	1973	1972	902	901	-1911	89	1070	2812
chr11	96049823	Ube2z	NM_172300	2.14966	1581	1492	1491	421	420	-2392	89	1070	2812
chr11	96768907	Snx11	NM_028965	2.09285	1222	955	954	139	138	-1358	267	815	1496
chr11	96817507	Nfe2l1	NM_008686	2.94722	4560	3895	3894	1669	1668	-93	665	2225	1761
chr11	96817509	Nfe2l1	NM_008686	2.94608	4558	3893	3892	1667	1666	-95	665	2225	1761
chr11	96817513	Nfe2l1	NM_008686	2.94381	4554	3889	3888	1663	1662	-99	665	2225	1761
chr11	96817546	Nfe2l1	NM_008686	2.92509	4521	3856	3855	1630	1629	-132	665	2225	1761
chr11	96817713	Nfe2l1	NM_008686	2.83031	4354	3689	3688	1463	1462	-299	665	2225	1761
chr11	96817716	Nfe2l1	NM_008686	2.8286	4351	3686	3685	1460	1459	-302	665	2225	1761
chr11	96817851	Nfe2l1	NM_008686	2.75199	4216	3551	3550	1325	1324	-437	665	2225	1761
chr11	96817947	Nfe2l1	NM_008686	2.6975	4120	3455	3454	1229	1228	-533	665	2225	1761
chr11	96818141	Nfe2l1	NM_008686	2.5874	3926	3261	3260	1035	1034	-727	665	2225	1761
chr11	96818410	Nfe2l1	NM_008686	2.43473	3657	2992	2991	766	765	-996	665	2225	1761
chr11	96818673	Nfe2l1	NM_008686	2.28547	3394	2729	2728	503	502	-1259	665	2225	1761
chr11	97161800	Kpnb1	NM_008379	2.29653	3818	3512	3511	881	880	-2090	306	2630	2970
chr11	97161832	Kpnb1	NM_008379	2.28576	3786	3480	3479	849	848	-2122	306	2630	2970
chr11	97161885	Kpnb1	NM_008379	2.26792	3733	3427	3426	796	795	-2175	306	2630	2970
chr11	97161964	Kpnb1	NM_008379	2.24133	3654	3348	3347	717	716	-2254	306	2630	2970
chr11	97161968	Kpnb1	NM_008379	2.23999	3650	3344	3343	713	712	-2258	306	2630	2970
chr11	97161975	Kpnb1	NM_008379	2.23763	3643	3337	3336	706	705	-2265	306	2630	2970
chr11	97162050	Kpnb1	NM_008379	2.21239	3568	3262	3261	631	630	-2340	306	2630	2970
chr11	97162068	Kpnb1	NM_008379	2.20633	3550	3244	3243	613	612	-2358	306	2630	2970
chr11	97683083	Mllt6	NM_139311	2.38646	4895	4736	4735	1496	1495	-2375	159	3239	3870
chr11	97683094	Mllt6	NM_139311	2.38931	4906	4747	4746	1507	1506	-2364	159	3239	3870
chr11	97683107	Mllt6	NM_139311	2.39266	4919	4760	4759	1520	1519	-2351	159	3239	3870
chr11	97715214	Pip4k2b	NM_054051	2.9846	4995	4896	4895	3645	3644	-57	99	1250	3701
chr11	97715231	Pip4k2b	NM_054051	2.98001	4978	4879	4878	3628	3627	-74	99	1250	3701
chr11	97715238	Pip4k2b	NM_054051	2.97812	4971	4872	4871	3621	3620	-81	99	1250	3701
chr11	97715249	Pip4k2b	NM_054051	2.97515	4960	4861	4860	3610	3609	-92	99	1250	3701
chr11	97716760	Pip4k2b	NM_054051	2.56699	3449	3350	3349	2099	2098	-1603	99	1250	3701
chr11	97716767	Pip4k2b	NM_054051	2.5651	3442	3343	3342	2092	2091	-1610	99	1250	3701
chr11	97716853	Pip4k2b	NM_054051	2.54187	3356	3257	3256	2006	2005	-1696	99	1250	3701
chr11	97716869	Pip4k2b	NM_054051	2.53755	3340	3241	3240	1990	1989	-1712	99	1250	3701
chr11	97716889	Pip4k2b	NM_054051	2.53214	3320	3221	3220	1970	1969	-1732	99	1250	3701
chr11	97716896	Pip4k2b	NM_054051	2.53025	3313	3214	3213	1963	1962	-1739	99	1250	3701
chr11	97716910	Pip4k2b	NM_054051	2.52647	3299	3200	3199	1949	1948	-1753	99	1250	3701
chr11	97716918	Pip4k2b	NM_054051	2.52431	3291	3192	3191	1941	1940	-1761	99	1250	3701
chr11	97745950	Cwc25	NM_026186	2.74536	2826	2656	2655	1405	1404	-480	170	1250	1884
chr11	98088785	Fbxl20	NM_028149	2.11454	2375	2117	2116	806	805	-6231	258	1310	7036
chr11	98437191	Erbb2	NM_001003817	2.49905	4472	4294	4293	523	522	-525	178	3770	1047
chr11	98582546	Ormdl3	NM_025661	2.11707	770	628	627	166	165	-1252	142	461	1417
chr11	98704660	Med24	NM_001361995	2.7767	3331	3204	3203	240	239	-69	127	2963	308
chr11	98704666	Med24	NM_001361995	2.75728	3325	3198	3197	234	233	-75	127	2963	308
chr11	98768108	Nr1d1	NM_145434	2.38889	2588	1960	1959	112	111	-176	628	1847	287
chr11	98832608	Casc3	NM_138660	2.24544	2542	2487	2486	390	389	-1199	55	2096	1588
chr11	98832654	Casc3	NM_138660	2.27439	2588	2533	2532	436	435	-1153	55	2096	1588
chr11	98832667	Casc3	NM_138660	2.28257	2601	2546	2545	449	448	-1140	55	2096	1588
chr11	98832736	Casc3	NM_138660	2.32599	2670	2615	2614	518	517	-1071	55	2096	1588
chr11	98833226	Casc3	NM_138660	2.63436	3160	3105	3104	1008	1007	-581	55	2096	1588
chr11	100322039	Eif1	NM_011508	2.9187	1200	1020	1019	678	677	-60	180	341	737
[truncated: 9,673 more rows]

## Sheet: 3' UTR random positions
gene_name	refseqID	utr3_size	random_utr3_st	random_utr3_end	random_rel_location
Lypla1	NM_008866	1718	852	-866	2.49593
Lypla1	NM_008866	1718	349	-1369	2.20314
Lypla1	NM_008866	1718	147	-1571	2.08556
Lypla1	NM_008866	1718	228	-1490	2.13271
Lypla1	NM_008866	1718	1371	-347	2.79802
Lypla1	NM_008866	1718	21	-1697	2.01222
Lypla1	NM_008866	1718	852	-866	2.49593
Atp6v1h	NM_133826	383	51	-332	2.13316
Rrs1	NM_021511	833	443	-390	2.53181
Rrs1	NM_021511	833	697	-136	2.83673
Rrs1	NM_021511	833	493	-340	2.59184
Rrs1	NM_021511	833	83	-750	2.09964
Vcpip1	NM_173443	5859	753	-5106	2.12852
Vcpip1	NM_173443	5859	2187	-3672	2.37327
Vcpip1	NM_173443	5859	2653	-3206	2.45281
Vcpip1	NM_173443	5859	5625	-234	2.96006
Vcpip1	NM_173443	5859	3176	-2683	2.54207
Vcpip1	NM_173443	5859	3007	-2852	2.51323
Vcpip1	NM_173443	5859	2066	-3793	2.35262
Vcpip1	NM_173443	5859	260	-5599	2.04438
Vcpip1	NM_173443	5859	5751	-108	2.98157
Vcpip1	NM_173443	5859	4553	-1306	2.7771
Vcpip1	NM_173443	5859	3953	-1906	2.67469
Vcpip1	NM_173443	5859	2493	-3366	2.4255
Vcpip1	NM_173443	5859	2231	-3628	2.38078
Vcpip1	NM_173443	5859	1281	-4578	2.21864
Vcpip1	NM_173443	5859	3127	-2732	2.53371
Vcpip1	NM_173443	5859	236	-5623	2.04028
Vcpip1	NM_173443	5859	1003	-4856	2.17119
Vcpip1	NM_173443	5859	3353	-2506	2.57228
Vcpip1	NM_173443	5859	3527	-2332	2.60198
Sgk3	NM_133220	3677	3381	-296	2.9195
Sgk3	NM_133220	3677	3260	-417	2.88659
Sgk3	NM_133220	3677	3006	-671	2.81751
Sgk3	NM_133220	3677	3607	-70	2.98096
Sgk3	NM_133220	3677	1380	-2297	2.37531
Sgk3	NM_133220	3677	3424	-253	2.93119
Sgk3	NM_133220	3677	1376	-2301	2.37422
Sgk3	NM_133220	3677	449	-3228	2.12211
Sgk3	NM_133220	3677	1712	-1965	2.4656
Sgk3	NM_133220	3677	662	-3015	2.18004
Sgk3	NM_133220	3677	1915	-1762	2.52081
Sgk3	NM_133220	3677	747	-2930	2.20315
Sgk3	NM_133220	3677	3408	-269	2.92684
Sgk3	NM_133220	3677	339	-3338	2.09219
Arfgef1	NM_001102430	1324	263	-1061	2.19864
Sulf1	NM_172294	1529	1012	-517	2.66187
Ncoa2	NM_008678	3655	1686	-1969	2.46129
Ncoa2	NM_008678	3655	285	-3370	2.07798
Ncoa2	NM_008678	3655	3580	-75	2.97948
Ncoa2	NM_008678	3655	1374	-2281	2.37592
Ncoa2	NM_008678	3655	2854	-801	2.78085
Terf1	NM_009352	969	916	-53	2.9453
Terf1	NM_009352	969	278	-691	2.28689
Terf1	NM_009352	969	353	-616	2.36429
Terf1	NM_009352	969	464	-505	2.47884
Rdh10	NM_133832	1132	140	-992	2.12367
Stau2	NM_001347044	1406	660	-746	2.46942
Ube2w	NM_025773	2594	501	-2093	2.19314
Ube2w	NM_025773	2594	17	-2577	2.00655
Ube2w	NM_025773	2594	730	-1864	2.28142
Ube2w	NM_025773	2594	2317	-277	2.89322
Ube2w	NM_025773	2594	329	-2265	2.12683
Ube2w	NM_025773	2594	1045	-1549	2.40285
Ube2w	NM_025773	2594	374	-2220	2.14418
Eloc	NM_026456	522	31	-491	2.05939
Eloc	NM_026456	522	42	-480	2.08046
Tmem70	NM_026392	849	197	-652	2.23204
Tmem70	NM_026392	849	421	-428	2.49588
Tmem70	NM_026392	849	53	-796	2.06243
Mcm3	NM_008563	487	385	-102	2.79055
Mcm3	NM_008563	487	481	-6	2.98768
B3gat2	NM_172124	2670	1022	-1648	2.38277
Smap1	NM_028534	803	596	-207	2.74222
Lmbrd1	NM_026719	3564	3395	-169	2.95258
Imp4	NM_178601	1276	531	-745	2.41614
Fam168b	NM_174997	4203	1116	-3087	2.26552
Fam168b	NM_174997	4203	141	-4062	2.03355
Fam168b	NM_174997	4203	3765	-438	2.89579
Fam168b	NM_174997	4203	670	-3533	2.15941
Fam168b	NM_174997	4203	1782	-2421	2.42398
Fam168b	NM_174997	4203	434	-3769	2.10326
Fam168b	NM_174997	4203	1282	-2921	2.30502
Fam168b	NM_174997	4203	2285	-1918	2.54366
Plekhb2	NM_001357425	2506	1471	-1035	2.58699
Plekhb2	NM_001357425	2506	1704	-802	2.67997
Plekhb2	NM_001357425	2506	1191	-1315	2.47526
Plekhb2	NM_001357425	2506	69	-2437	2.02753
Plekhb2	NM_001357425	2506	845	-1661	2.33719
Plekhb2	NM_001357425	2506	1220	-1286	2.48683
Plekhb2	NM_001357425	2506	551	-1955	2.21987
Plekhb2	NM_001357425	2506	1763	-743	2.70351
Plekhb2	NM_001357425	2506	418	-2088	2.1668
Inpp4a	NM_030266	2480	1092	-1388	2.44032
Coa5	NM_198006	3500	889	-2611	2.254
Coa5	NM_198006	3500	2402	-1098	2.68629
Coa5	NM_198006	3500	164	-3336	2.04686
2010300C02Rik	NM_028096	580	129	-451	2.22241
Eif5b	NM_198303	3865	1863	-2002	2.48202
Rev1	NM_001359288	300	7	-293	2.02333
Eif5b	NM_198303	3865	1812	-2053	2.46882
Rev1	NM_001359288	300	110	-190	2.36667
Eif5b	NM_198303	3865	1934	-1931	2.50039
Rev1	NM_001359288	300	106	-194	2.35333
Aff3	NM_001290814	3457	956	-2501	2.27654
Aff3	NM_001290814	3457	439	-3018	2.12699
Aff3	NM_001290814	3457	578	-2879	2.1672
Aff3	NM_001290814	3457	2710	-747	2.78392
Aff3	NM_001290814	3457	1603	-1854	2.4637
Aff3	NM_001290814	3457	54	-3403	2.01562
Aff3	NM_001290814	3457	2271	-1186	2.65693
Aff3	NM_001290814	3457	2989	-468	2.86462
Aff3	NM_001290814	3457	1595	-1862	2.46138
Cnot11	NM_028043	1610	9	-1601	2.00559
Cnot11	NM_028043	1610	184	-1426	2.11429
Cnot11	NM_028043	1610	260	-1350	2.16149
Rnf149	NM_001033135	1175	627	-548	2.53362
Rnf149	NM_001033135	1175	1117	-58	2.95064
Rnf149	NM_001033135	1175	322	-853	2.27404
Rnf149	NM_001033135	1175	164	-1011	2.13957
Rnf149	NM_001033135	1175	1106	-69	2.94128
Rnf149	NM_001033135	1175	139	-1036	2.1183
Rnf149	NM_001033135	1175	91	-1084	2.07745
Rnf149	NM_001033135	1175	90	-1085	2.0766
Rnf149	NM_001033135	1175	1168	-7	2.99404
Rnf149	NM_001033135	1175	690	-485	2.58723
Rnf149	NM_001033135	1175	866	-309	2.73702
Rnf149	NM_001033135	1175	815	-360	2.69362
Rnf149	NM_001033135	1175	1122	-53	2.95489
Rnf149	NM_001033135	1175	1158	-17	2.98553
Rnf149	NM_001033135	1175	1025	-150	2.87234
Rnf149	NM_001033135	1175	745	-430	2.63404
Rnf149	NM_001033135	1175	1116	-59	2.94979
Rnf149	NM_001033135	1175	740	-435	2.62979
Rnf149	NM_001033135	1175	904	-271	2.76936
Map4k4	NM_001252201	1597	196	-1401	2.12273
Map4k4	NM_001252201	1597	562	-1035	2.35191
Map4k4	NM_001252201	1597	1336	-261	2.83657
Map4k4	NM_001252201	1597	693	-904	2.43394
Map4k4	NM_001252201	1597	1216	-381	2.76143
Map4k4	NM_001252201	1597	1316	-281	2.82405
Map4k4	NM_001252201	1597	440	-1157	2.27552
Map4k4	NM_001252201	1597	151	-1446	2.09455
Map4k4	NM_001252201	1597	288	-1309	2.18034
Map4k4	NM_001252201	1597	546	-1051	2.34189
Map4k4	NM_001252201	1597	1196	-401	2.7489
Map4k4	NM_001252201	1597	1048	-549	2.65623
Map4k4	NM_001252201	1597	1195	-402	2.74828
Map4k4	NM_001252201	1597	639	-958	2.40013
Map4k4	NM_001252201	1597	1208	-389	2.75642
Map4k4	NM_001252201	1597	42	-1555	2.0263
Map4k4	NM_001252201	1597	652	-945	2.40827
Map4k4	NM_001252201	1597	619	-978	2.3876
Map4k4	NM_001252201	1597	184	-1413	2.11522
Map4k4	NM_001252201	1597	542	-1055	2.33939
Map4k4	NM_001252201	1597	1347	-250	2.84346
Map4k4	NM_001252201	1597	1537	-60	2.96243
Map4k4	NM_001252201	1597	989	-608	2.61929
Map4k4	NM_001252201	1597	239	-1358	2.14966
Mrps9	NM_023514	186	70	-116	2.37634
Mrps9	NM_023514	186	124	-62	2.66667
AI597479	NM_133818	2703	1160	-1543	2.42915
AI597479	NM_133818	2703	750	-1953	2.27747
Nck2	NM_010879	1175	921	-254	2.78383
Nabp1	NM_028696	1756	459	-1297	2.26139
Nabp1	NM_028696	1756	1413	-343	2.80467
Nabp1	NM_028696	1756	1155	-601	2.65774
Nabp1	NM_028696	1756	593	-1163	2.3377
Myo1b	NM_001161817	1414	1337	-77	2.94554
Myo1b	NM_001161817	1414	1355	-59	2.95827
Nab1	NM_008667	3368	3133	-235	2.93023
Nab1	NM_008667	3368	2979	-389	2.8845
Nab1	NM_008667	3368	725	-2643	2.21526
Stk17b	NM_133810	1975	1348	-627	2.68253
Pgap1	NM_001163314	7705	2595	-5110	2.33679
Pgap1	NM_001163314	7705	3848	-3857	2.49942
Pgap1	NM_001163314	7705	1731	-5974	2.22466
Sf3b1	NM_031179	2163	1160	-1003	2.53629
Sf3b1	NM_031179	2163	460	-1703	2.21267
Coq10b	NM_001039710	898	92	-806	2.10245
Coq10b	NM_001039710	898	483	-415	2.53786
Coq10b	NM_001039710	898	157	-741	2.17483
Hspe1	NM_008303	196	1	-195	2.0051
Mob4	NM_025283	2092	1930	-162	2.92256
Mob4	NM_025283	2092	1882	-210	2.89962
Mob4	NM_025283	2092	1188	-904	2.56788
Mob4	NM_025283	2092	297	-1795	2.14197
1700066M21Rik	NM_028546	1857	823	-1034	2.44319
Kctd18	NM_001159864	1226	1199	-27	2.97798
Kctd18	NM_001159864	1226	1094	-132	2.89233
Kctd18	NM_001159864	1226	316	-910	2.25775
Kctd18	NM_001159864	1226	917	-309	2.74796
Kctd18	NM_001159864	1226	778	-448	2.63458
Kctd18	NM_001159864	1226	1167	-59	2.95188
Kctd18	NM_001159864	1226	448	-778	2.36542
Kctd18	NM_001159864	1226	1224	-2	2.99837
Kctd18	NM_001159864	1226	865	-361	2.70555
Kctd18	NM_001159864	1226	741	-485	2.6044
Kctd18	NM_001159864	1226	446	-780	2.36378
Kctd18	NM_001159864	1226	1160	-66	2.94617
Kctd18	NM_001159864	1226	215	-1011	2.17537
Kctd18	NM_001159864	1226	696	-530	2.5677
Kctd18	NM_001159864	1226	415	-811	2.3385
Kctd18	NM_001159864	1226	601	-625	2.49021
Kctd18	NM_001159864	1226	206	-1020	2.16803
Kctd18	NM_001159864	1226	586	-640	2.47798
Kctd18	NM_001159864	1226	924	-302	2.75367
Kctd18	NM_001159864	1226	540	-686	2.44046
Kctd18	NM_001159864	1226	790	-436	2.64437
Kctd18	NM_001159864	1226	15	-1211	2.01223
Kctd18	NM_001159864	1226	1008	-218	2.82219
Kctd18	NM_001159864	1226	812	-414	2.66232
Kctd18	NM_001159864	1226	419	-807	2.34176
Bzw1	NM_025824	2287	1568	-719	2.68561
Bzw1	NM_025824	2287	1251	-1036	2.547
Bzw1	NM_025824	2287	1850	-437	2.80892
Bzw1	NM_025824	2287	458	-1829	2.20026
Bzw1	NM_025824	2287	21	-2266	2.00918
Bzw1	NM_025824	2287	1260	-1027	2.55094
Bzw1	NM_025824	2287	1028	-1259	2.4495
Nif3l1	NM_022988	950	877	-73	2.92316
Als2	NM_001159948	1420	1201	-219	2.84577
Mpp4	NM_001164682	317	11	-306	2.0347
Als2	NM_001159948	1420	625	-795	2.44014
Mpp4	NM_001164682	317	30	-287	2.09464
Sumo1	NM_009460	765	497	-268	2.64967
Fam117b	NM_001037725	3620	2842	-778	2.78508
Fam117b	NM_001037725	3620	1325	-2295	2.36602
Fam117b	NM_001037725	3620	2589	-1031	2.71519
Fam117b	NM_001037725	3620	2265	-1355	2.62569
Fam117b	NM_001037725	3620	344	-3276	2.09503
Fam117b	NM_001037725	3620	165	-3455	2.04558
Fam117b	NM_001037725	3620	411	-3209	2.11354
Fam117b	NM_001037725	3620	3536	-84	2.9768
Fam117b	NM_001037725	3620	742	-2878	2.20497
Fam117b	NM_001037725	3620	182	-3438	2.05028
Fam117b	NM_001037725	3620	1964	-1656	2.54254
Fam117b	NM_001037725	3620	466	-3154	2.12873
Fam117b	NM_001037725	3620	2112	-1508	2.58343
Fam117b	NM_001037725	3620	2457	-1163	2.67873
Fam117b	NM_001037725	3620	2732	-888	2.7547
Ndufs1	NM_001160039	238	183	-55	2.76891
Creb1	NM_009952	7169	7018	-151	2.97894
Idh1	NM_010497	848	581	-267	2.68514
Idh1	NM_010497	848	356	-492	2.41981
Idh1	NM_010497	848	134	-714	2.15802
Pikfyve	NM_001310624	4937	242	-4695	2.04902
Pikfyve	NM_001310624	4937	1540	-3397	2.31193
Atic	NM_026195	731	345	-386	2.47196
Atic	NM_026195	731	373	-358	2.51026
Atic	NM_026195	731	206	-525	2.28181
Fn1	NM_010233	738	291	-447	2.39431
Rpl37a	NM_009084	247	204	-43	2.82591
Rpl37a	NM_009084	247	16	-231	2.06478
Arpc2	NM_029711	413	343	-70	2.83051
Aamp	NM_146110	393	137	-256	2.3486
Aamp	NM_146110	393	44	-349	2.11196
Usp37	NM_176972	3880	2653	-1227	2.68376
Usp37	NM_176972	3880	1801	-2079	2.46418
Cnot9	NM_021383	1987	1818	-169	2.91495
Cnot9	NM_021383	1987	650	-1337	2.32713
Cnot9	NM_021383	1987	524	-1463	2.26371
Retreg2	NM_170755	853	835	-18	2.9789
Retreg2	NM_170755	853	326	-527	2.38218
Retreg2	NM_170755	853	783	-70	2.91794
Stk11ip	NM_027886	1099	349	-750	2.31756
Farsb	NM_011811	448	281	-167	2.62723
Farsb	NM_011811	448	199	-249	2.4442
Acsl3	NM_001033606	1327	484	-843	2.36473
Acsl3	NM_001033606	1327	853	-474	2.6428
Acsl3	NM_001033606	1327	311	-1016	2.23436
Acsl3	NM_001033606	1327	1025	-302	2.77242
Acsl3	NM_001033606	1327	1326	-1	2.99925
Mrpl44	NM_001081210	306	233	-73	2.76144
Serpine2	NM_009255	683	230	-453	2.33675
Serpine2	NM_009255	683	549	-134	2.80381
Cul3	NM_016716	2232	1064	-1168	2.4767
Agfg1	NM_010472	5942	4620	-1322	2.77752
Trip12	NM_133975	3428	1419	-2009	2.41394
Trip12	NM_133975	3428	1992	-1436	2.5811
Trip12	NM_133975	3428	1464	-1964	2.42707
Trip12	NM_133975	3428	1504	-1924	2.43874
Trip12	NM_133975	3428	17	-3411	2.00496
Trip12	NM_133975	3428	3267	-161	2.95303
Trip12	NM_133975	3428	3181	-247	2.92795
Trip12	NM_133975	3428	808	-2620	2.23571
Trip12	NM_133975	3428	1068	-2360	2.31155
Cab39	NM_133781	2355	81	-2274	2.03439
Cab39	NM_133781	2355	1984	-371	2.84246
Cab39	NM_133781	2355	803	-1552	2.34098
Cab39	NM_133781	2355	1503	-852	2.63822
Cab39	NM_133781	2355	728	-1627	2.30913
Cab39	NM_133781	2355	357	-1998	2.15159
Itm2c	NM_022417	1059	665	-394	2.62795
Ncl	NM_010880	5900	441	-5459	2.07475
Ncl	NM_010880	5900	758	-5142	2.12847
Ncl	NM_010880	5900	2935	-2965	2.49746
Ncl	NM_010880	5900	334	-5566	2.05661
Ptma	NM_008972	698	632	-66	2.90544
Ptma	NM_008972	698	285	-413	2.40831
Cops7b	NM_172974	1611	1014	-597	2.62942
Dgkd	NM_177646	2016	1340	-676	2.66468
Dgkd	NM_177646	2016	1681	-335	2.83383
Dgkd	NM_177646	2016	773	-1243	2.38343
Dgkd	NM_177646	2016	266	-1750	2.13194
Dgkd	NM_177646	2016	697	-1319	2.34573
Hjurp	NM_198652	6324	3058	-3266	2.48355
Sh3bp4	NM_133816	1735	892	-843	2.51412
Cops8	NM_133805	1087	1019	-68	2.93744
Cops8	NM_133805	1087	822	-265	2.75621
Cops8	NM_133805	1087	34	-1053	2.03128
Cops8	NM_133805	1087	146	-941	2.13431
Cops8	NM_133805	1087	779	-308	2.71665
Cops8	NM_133805	1087	869	-218	2.79945
2019-09-02	NM_001159719	2037	1636	-401	2.80314
2019-09-02	NM_001159719	2037	895	-1142	2.43937
2019-09-02	NM_001159719	2037	968	-1069	2.47521
2019-09-02	NM_001159719	2037	1697	-340	2.83309
2019-09-02	NM_001159719	2037	1269	-768	2.62297
2019-09-02	NM_001159719	2037	48	-1989	2.02356
Fam174a	NM_026321	1344	782	-562	2.58185
Fam174a	NM_026321	1344	454	-890	2.3378
Fam174a	NM_026321	1344	454	-890	2.3378
Fam174a	NM_026321	1344	4	-1340	2.00298
Pam	NM_013626	715	17	-698	2.02378
Tsn	NM_011650	2289	435	-1854	2.19004
Tsn	NM_011650	2289	791	-1498	2.34557
Tsn	NM_011650	2289	496	-1793	2.21669
Tsn	NM_011650	2289	1597	-692	2.69768
Tsn	NM_011650	2289	1154	-1135	2.50415
Tsn	NM_011650	2289	308	-1981	2.13456
Tsn	NM_011650	2289	1739	-550	2.75972
Tsn	NM_011650	2289	2207	-82	2.96418
Tsn	NM_011650	2289	147	-2142	2.06422
Tsn	NM_011650	2289	1993	-296	2.87069
Tsn	NM_011650	2289	1318	-971	2.5758
Tsn	NM_011650	2289	2142	-147	2.93578
Tsn	NM_011650	2289	742	-1547	2.32416
Tsn	NM_011650	2289	270	-2019	2.11796
Tsn	NM_011650	2289	183	-2106	2.07995
Tsn	NM_011650	2289	206	-2083	2.09
Tsn	NM_011650	2289	1287	-1002	2.56225
Tsn	NM_011650	2289	1738	-551	2.75928
Tsn	NM_011650	2289	318	-1971	2.13893
Tsn	NM_011650	2289	396	-1893	2.173
Tsn	NM_011650	2289	864	-1425	2.37746
Tsn	NM_011650	2289	1999	-290	2.87331
Tsn	NM_011650	2289	307	-1982	2.13412
Tsn	NM_011650	2289	790	-1499	2.34513
Tsn	NM_011650	2289	1004	-1285	2.43862
Tsn	NM_011650	2289	173	-2116	2.07558
Tsn	NM_011650	2289	732	-1557	2.31979
Tsn	NM_011650	2289	159	-2130	2.06946
Tsn	NM_011650	2289	1958	-331	2.8554
Tsn	NM_011650	2289	2006	-283	2.87637
Tsn	NM_011650	2289	270	-2019	2.11796
Tsn	NM_011650	2289	1839	-450	2.80341
Tsn	NM_011650	2289	1277	-1012	2.55789
Tsn	NM_011650	2289	159	-2130	2.06946
Tsn	NM_011650	2289	1782	-507	2.77851
Tsn	NM_011650	2289	1841	-448	2.80428
Nifk	NM_026472	889	566	-323	2.63667
Nifk	NM_026472	889	374	-515	2.4207
Nifk	NM_026472	889	136	-753	2.15298
Nifk	NM_026472	889	240	-649	2.26997
Clasp1	NM_001293301	2467	1263	-1204	2.51196
Clasp1	NM_001293301	2467	1892	-575	2.76692
Tmem185b	NM_146103	1419	992	-427	2.69908
Slc35f5	NM_028787	942	654	-288	2.69427
R3hdm1	NM_181750	976	874	-102	2.89549
R3hdm1	NM_181750	976	290	-686	2.29713
R3hdm1	NM_181750	976	657	-319	2.67316
R3hdm1	NM_181750	976	609	-367	2.62398
Dars	NM_177445	526	241	-285	2.45817
Cxcr4	NM_001356509	643	157	-486	2.24417
Srgap2	NM_001081011	4105	2704	-1401	2.65871
Nucks1	NM_175294	5114	2194	-2920	2.42902
Dstyk	NM_172516	3447	1513	-1934	2.43893
Dstyk	NM_172516	3447	3396	-51	2.9852
Dstyk	NM_172516	3447	1876	-1571	2.54424
Dstyk	NM_172516	3447	3405	-42	2.98782
Dstyk	NM_172516	3447	1109	-2338	2.32173
Rbbp5	NM_001357486	1872	179	-1693	2.09562
Rbbp5	NM_001357486	1872	1363	-509	2.7281
Mdm4	NM_008575	5550	3118	-2432	2.5618
Mdm4	NM_008575	5550	5367	-183	2.96703
Mdm4	NM_008575	5550	2134	-3416	2.3845
Mdm4	NM_008575	5550	2516	-3034	2.45333
Ppp1r15b	NM_133819	2912	366	-2546	2.12569
Ppp1r15b	NM_133819	2912	1155	-1757	2.39663
Ppp1r15b	NM_133819	2912	1745	-1167	2.59924
Ppp1r15b	NM_133819	2912	1736	-1176	2.59615
Ppp1r15b	NM_133819	2912	2794	-118	2.95948
Ppp1r15b	NM_133819	2912	2463	-449	2.84581
Ppp1r15b	NM_133819	2912	897	-2015	2.30804
Ppp1r15b	NM_133819	2912	1806	-1106	2.62019
Ppp1r15b	NM_133819	2912	1874	-1038	2.64354
Ppp1r15b	NM_133819	2912	2725	-187	2.93578
Ppp1r15b	NM_133819	2912	812	-2100	2.27885
Ppp1r15b	NM_133819	2912	2665	-247	2.91518
Ppp1r15b	NM_133819	2912	2066	-846	2.70948
Ppp1r15b	NM_133819	2912	645	-2267	2.2215
Ppp1r15b	NM_133819	2912	1668	-1244	2.5728
Ppp1r15b	NM_133819	2912	1187	-1725	2.40762
Ppp1r15b	NM_133819	2912	1386	-1526	2.47596
Ppp1r15b	NM_133819	2912	1640	-1272	2.56319
Sox13	NM_011439	1350	1266	-84	2.93778
Sox13	NM_011439	1350	91	-1259	2.06741
Zc3h11a	NM_001276767	1671	1564	-107	2.93597
Zbed6	NM_001166552	775	286	-489	2.36903
Atp2b4	NM_213616	4016	915	-3101	2.22784
Klhl12	NM_001311136	1414	1161	-253	2.82107
Klhl12	NM_001311136	1414	668	-746	2.47242
Klhl12	NM_001311136	1414	488	-926	2.34512
Klhl12	NM_001311136	1414	423	-991	2.29915
Klhl12	NM_001311136	1414	1151	-263	2.814
Klhl12	NM_001311136	1414	306	-1108	2.21641
Klhl12	NM_001311136	1414	915	-499	2.6471
Kdm5b	NM_152895	1503	1465	-38	2.97472
Kdm5b	NM_152895	1503	663	-840	2.44112
Kdm5b	NM_152895	1503	738	-765	2.49102
Kdm5b	NM_152895	1503	1436	-67	2.95542
Kdm5b	NM_152895	1503	1394	-109	2.92748
Kdm5b	NM_152895	1503	909	-594	2.60479
Kdm5b	NM_152895	1503	636	-867	2.42315
Kdm5b	NM_152895	1503	593	-910	2.39454
Kdm5b	NM_152895	1503	1193	-310	2.79375
Kdm5b	NM_152895	1503	679	-824	2.45176
Kdm5b	NM_152895	1503	1400	-103	2.93147
Ube2t	NM_026024	232	96	-136	2.41379
Arl8a	NM_026823	996	543	-453	2.54518
Arl8a	NM_026823	996	633	-363	2.63554
Arl8a	NM_026823	996	419	-577	2.42068
Arl8a	NM_026823	996	954	-42	2.95783
Arl8a	NM_026823	996	352	-644	2.35341
Arl8a	NM_026823	996	25	-971	2.0251
Arl8a	NM_026823	996	117	-879	2.11747
Camsap2	NM_001347110	2718	427	-2291	2.1571
Camsap2	NM_001347110	2718	2090	-628	2.76895
Zfp281	NM_177643	2423	1172	-1251	2.4837
Zfp281	NM_177643	2423	308	-2115	2.12712
Zfp281	NM_177643	2423	8	-2415	2.0033
Zfp281	NM_177643	2423	94	-2329	2.03879
Zfp281	NM_177643	2423	2364	-59	2.97565
Zfp281	NM_177643	2423	1687	-736	2.69624
Nek7	NM_021605	3162	2133	-1029	2.67457
Nek7	NM_021605	3162	2620	-542	2.82859
Cdc73	NM_145991	5244	2119	-3125	2.40408
Cdc73	NM_145991	5244	5094	-150	2.9714
Cdc73	NM_145991	5244	3126	-2118	2.59611
Prg4	NM_001110146	571	253	-318	2.44308
Prg4	NM_001110146	571	514	-57	2.90018
Tpr	NM_133780	147	91	-56	2.61905
Ivns1abp	NM_054102	1079	628	-451	2.58202
Ivns1abp	NM_054102	1079	107	-972	2.09917
Ivns1abp	NM_054102	1079	314	-765	2.29101
Ivns1abp	NM_054102	1079	907	-172	2.84059
Swt1	NM_025819	759	613	-146	2.80764
Swt1	NM_025819	759	692	-67	2.91173
Rnf2	NM_011277	1917	1580	-337	2.8242
Rnf2	NM_011277	1917	91	-1826	2.04747
Rnf2	NM_011277	1917	1052	-865	2.54877
Rnf2	NM_011277	1917	1881	-36	2.98122
Rnf2	NM_011277	1917	1693	-224	2.88315
Arpc5	NM_026369	1257	637	-620	2.50676
Arpc5	NM_026369	1257	699	-558	2.55609
Smg7	NM_001005507	2276	219	-2057	2.09622
Smg7	NM_001005507	2276	1638	-638	2.71968
Smg7	NM_001005507	2276	1371	-905	2.60237
Smg7	NM_001005507	2276	968	-1308	2.42531
Smg7	NM_001005507	2276	879	-1397	2.3862
Smg7	NM_001005507	2276	463	-1813	2.20343
Shcbp1l	NM_001033162	109	75	-34	2.68807
Shcbp1l	NM_001033162	109	90	-19	2.82569
Shcbp1l	NM_001033162	109	94	-15	2.86239
Dhx9	NM_007842	310	176	-134	2.56774
Glul	NM_008131	1540	1464	-76	2.95065
Glul	NM_008131	1540	546	-994	2.35455
Glul	NM_008131	1540	917	-623	2.59545
Glul	NM_008131	1540	1183	-357	2.76818
Glul	NM_008131	1540	142	-1398	2.09221
Glul	NM_008131	1540	780	-760	2.50649
Glul	NM_008131	1540	945	-595	2.61364
Glul	NM_008131	1540	185	-1355	2.12013
Glul	NM_008131	1540	1437	-103	2.93312
Glul	NM_008131	1540	881	-659	2.57208
Glul	NM_008131	1540	389	-1151	2.2526
Glul	NM_008131	1540	377	-1163	2.24481
Glul	NM_008131	1540	421	-1119	2.27338
Glul	NM_008131	1540	859	-681	2.55779
Glul	NM_008131	1540	1	-1539	2.00065
Glul	NM_008131	1540	308	-1232	2.2
Glul	NM_008131	1540	287	-1253	2.18636
Glul	NM_008131	1540	127	-1413	2.08247
Glul	NM_008131	1540	443	-1097	2.28766
Glul	NM_008131	1540	969	-571	2.62922
Glul	NM_008131	1540	1455	-85	2.94481
Glul	NM_008131	1540	1361	-179	2.88377
Glul	NM_008131	1540	1537	-3	2.99805
Stx6	NM_021433	1500	595	-905	2.39667
Stx6	NM_021433	1500	835	-665	2.55667
Tor1aip2	NM_001160180	1462	496	-966	2.33926
Tor1aip2	NM_001160180	1462	70	-1392	2.04788
Tor1aip2	NM_001160180	1462	1391	-71	2.95144
Tor1aip2	NM_001160180	1462	144	-1318	2.0985
Tdrd5	NM_001134741	277	268	-9	2.96751
Soat1	NM_009230	2950	1226	-1724	2.41559
Abl2	NM_009595	6902	6796	-106	2.98464
Abl2	NM_009595	6902	5207	-1695	2.75442
Fam20b	NM_145413	2839	2729	-110	2.96125
Fam20b	NM_145413	2839	779	-2060	2.27439
Ralgps2	NM_001159967	4997	341	-4656	2.06824
Ralgps2	NM_001159967	4997	2689	-2308	2.53812
Ralgps2	NM_001159967	4997	4916	-81	2.98379
Mrps14	NM_001347121	1575	881	-694	2.55937
Cacybp	NM_009786	1199	1000	-199	2.83403
Cacybp	NM_009786	1199	911	-288	2.7598
Cacybp	NM_009786	1199	682	-517	2.56881
Cacybp	NM_009786	1199	853	-346	2.71143
Cacybp	NM_009786	1199	1093	-106	2.91159
Cacybp	NM_009786	1199	484	-715	2.40367
Cacybp	NM_009786	1199	978	-221	2.81568
Cacybp	NM_009786	1199	585	-614	2.48791
Cacybp	NM_009786	1199	657	-542	2.54796
Cacybp	NM_009786	1199	1011	-188	2.8432
Cacybp	NM_009786	1199	273	-926	2.22769
Rc3h1	NM_001024952	7178	1034	-6144	2.14405
Zbtb37	NM_173424	2164	1259	-905	2.58179
Ankrd45	NM_028664	2818	1196	-1622	2.42441
Suco	NM_172645	2253	1042	-1211	2.46249
Vamp4	NM_001356527	4505	2794	-1711	2.6202
Mpzl1	NM_001001880	1471	497	-974	2.33787
Mpzl1	NM_001001880	1471	1450	-21	2.98572
Mpzl1	NM_001001880	1471	1141	-330	2.77566
Mpzl1	NM_001001880	1471	141	-1330	2.09585
Mpzl1	NM_001001880	1471	213	-1258	2.1448
Mpzl1	NM_001001880	1471	1171	-300	2.79606
Mpzl1	NM_001001880	1471	704	-767	2.47859
Pou2f1	NM_198933	10583	10137	-446	2.95786
Pou2f1	NM_198933	10583	2572	-8011	2.24303
Pou2f1	NM_198933	10583	1092	-9491	2.10318
Pou2f1	NM_198933	10583	9273	-1310	2.87622
Pou2f1	NM_198933	10583	7923	-2660	2.74865
Tmco1	NM_001039483	3712	912	-2800	2.24569
Tmco1	NM_001039483	3712	1555	-2157	2.41891
Tmco1	NM_001039483	3712	3302	-410	2.88955
Hsd17b7	NM_010476	3495	403	-3092	2.11531
Sdhc	NM_025321	643	479	-164	2.74495
Sdhc	NM_025321	643	597	-46	2.92846
Sdhc	NM_025321	643	521	-122	2.81026
Sdhc	NM_025321	643	73	-570	2.11353
Sdhc	NM_025321	643	2	-641	2.00311
Pfdn2	NM_011070	1227	458	-769	2.37327
F11r	NM_172647	1498	861	-637	2.57477
F11r	NM_172647	1498	66	-1432	2.04406
F11r	NM_172647	1498	1118	-380	2.74633
Ncstn	NM_021607	660	543	-117	2.82273
Copa	NM_009938	572	291	-281	2.50874
Copa	NM_009938	572	391	-181	2.68357
Copa	NM_009938	572	173	-399	2.30245
Dcaf8	NM_001357204	1720	1044	-676	2.60698
Dcaf8	NM_001357204	1720	116	-1604	2.06744
Dcaf8	NM_001357204	1720	302	-1418	2.17558
Dcaf8	NM_001357204	1720	51	-1669	2.02965
Dcaf8	NM_001357204	1720	1198	-522	2.69651
Dcaf8	NM_001357204	1720	1086	-634	2.6314
Igsf8	NM_080419	274	151	-123	2.55109
Igsf8	NM_080419	274	245	-29	2.89416
Igsf8	NM_080419	274	241	-33	2.87956
Chml	NM_021350	4249	3317	-932	2.78065
Cep170	NM_001099637	2026	1885	-141	2.9304
Cep170	NM_001099637	2026	122	-1904	2.06022
Akt3	NM_011785	5287	2234	-3053	2.42255
Akt3	NM_011785	5287	2090	-3197	2.39531
Zbtb18	NM_001355103	2867	2603	-264	2.90792
Zbtb18	NM_001355103	2867	2202	-665	2.76805
Adss	NM_007422	1066	166	-900	2.15572
Adss	NM_007422	1066	466	-600	2.43715
Desi2	NM_024282	3128	539	-2589	2.17231
Hnrnpu	NM_016805	2619	657	-1962	2.25086
Hnrnpu	NM_016805	2619	1958	-661	2.74761
Hnrnpu	NM_016805	2619	2425	-194	2.92593
Hnrnpu	NM_016805	2619	522	-2097	2.19931
Smyd3	NM_027188	5500	2773	-2727	2.50418
Ahctf1	NM_026375	1428	367	-1061	2.257
Ahctf1	NM_026375	1428	1239	-189	2.86765
Cdc42bpa	NM_001346804	3436	3374	-62	2.98196
Parp1	NM_007415	467	80	-387	2.17131
Parp1	NM_007415	467	68	-399	2.14561
Parp1	NM_007415	467	373	-94	2.79872
Parp1	NM_007415	467	400	-67	2.85653
Parp1	NM_007415	467	114	-353	2.24411
Parp1	NM_007415	467	3	-464	2.00642
Parp1	NM_007415	467	384	-83	2.82227
Parp1	NM_007415	467	406	-61	2.86938
Parp1	NM_007415	467	410	-57	2.87794
Parp1	NM_007415	467	52	-415	2.11135
Parp1	NM_007415	467	11	-456	2.02355
Parp1	NM_007415	467	426	-41	2.91221
Parp1	NM_007415	467	84	-383	2.17987
Parp1	NM_007415	467	181	-286	2.38758
Parp1	NM_007415	467	451	-16	2.96574
Parp1	NM_007415	467	206	-261	2.44111
Parp1	NM_007415	467	400	-67	2.85653
Parp1	NM_007415	467	402	-65	2.86081
Parp1	NM_007415	467	77	-390	2.16488
Lin9	NM_001103182	1313	145	-1168	2.11043
Acbd3	NM_133225	1833	1555	-278	2.84834
Acbd3	NM_133225	1833	1344	-489	2.73322
Acbd3	NM_133225	1833	1126	-707	2.61429
Acbd3	NM_133225	1833	352	-1481	2.19203
Acbd3	NM_133225	1833	1305	-528	2.71195
Acbd3	NM_133225	1833	888	-945	2.48445
Acbd3	NM_133225	1833	1767	-66	2.96399
H3f3a	NM_008210	516	118	-398	2.22868
Sde2	NM_145943	1820	1810	-10	2.99451
Sde2	NM_145943	1820	487	-1333	2.26758
Sde2	NM_145943	1820	437	-1383	2.24011
Sde2	NM_145943	1820	1413	-407	2.77637
Nvl	NM_026171	6726	6709	-17	2.99747
Wdr26	NM_145514	4579	3990	-589	2.87137
Wdr26	NM_145514	4579	258	-4321	2.05634
Wdr26	NM_145514	4579	2161	-2418	2.47194
Lbr	NM_133815	1542	270	-1272	2.1751
Lbr	NM_133815	1542	214	-1328	2.13878
Lbr	NM_133815	1542	1470	-72	2.95331
Lbr	NM_133815	1542	141	-1401	2.09144
Lbr	NM_133815	1542	926	-616	2.60052
Lbr	NM_133815	1542	567	-975	2.3677
Lbr	NM_133815	1542	1066	-476	2.69131
Lbr	NM_133815	1542	1031	-511	2.66861
Lbr	NM_133815	1542	585	-957	2.37938
Lbr	NM_133815	1542	844	-698	2.54734
Lbr	NM_133815	1542	282	-1260	2.18288
Lbr	NM_133815	1542	1069	-473	2.69326
Lbr	NM_133815	1542	1526	-16	2.98962
Lbr	NM_133815	1542	798	-744	2.51751
Lbr	NM_133815	1542	785	-757	2.50908
Lbr	NM_133815	1542	1020	-522	2.66148
Lbr	NM_133815	1542	517	-1025	2.33528
Lbr	NM_133815	1542	412	-1130	2.26719
Lbr	NM_133815	1542	422	-1120	2.27367
Lbr	NM_133815	1542	291	-1251	2.18872
Lbr	NM_133815	1542	173	-1369	2.11219
Lbr	NM_133815	1542	1343	-199	2.87095
Lbr	NM_133815	1542	1315	-227	2.85279
Lbr	NM_133815	1542	313	-1229	2.20298
Lbr	NM_133815	1542	683	-859	2.44293
Lbr	NM_133815	1542	1394	-148	2.90402
Lbr	NM_133815	1542	884	-658	2.57328
Lbr	NM_133815	1542	781	-761	2.50649
Lbr	NM_133815	1542	566	-976	2.36706
Lbr	NM_133815	1542	550	-992	2.35668
Lbr	NM_133815	1542	260	-1282	2.16861
Lbr	NM_133815	1542	1475	-67	2.95655
Lbr	NM_133815	1542	1365	-177	2.88521
Enah	NM_001083121	9473	8218	-1255	2.86752
Enah	NM_001083121	9473	4047	-5426	2.42721
Enah	NM_001083121	9473	5597	-3876	2.59084
Enah	NM_001083121	9473	8088	-1385	2.85379
Enah	NM_001083121	9473	92	-9381	2.00971
Enah	NM_001083121	9473	2855	-6618	2.30138
Srp9	NM_012058	959	348	-611	2.36288
Srp9	NM_012058	959	292	-667	2.30448
Srp9	NM_012058	959	879	-80	2.91658
Srp9	NM_012058	959	316	-643	2.32951
Srp9	NM_012058	959	244	-715	2.25443
Srp9	NM_012058	959	350	-609	2.36496
Fbxo28	NM_175127	3788	3727	-61	2.9839
Fbxo28	NM_175127	3788	2083	-1705	2.54989
Fbxo28	NM_175127	3788	942	-2846	2.24868
Fbxo28	NM_175127	3788	2238	-1550	2.59081
Fbxo28	NM_175127	3788	2059	-1729	2.54356
Trp53bp2	NM_173378	707	407	-300	2.57567
Mark1	NM_145515	2099	1810	-289	2.86232
Mark1	NM_145515	2099	645	-1454	2.30729
Mark1	NM_145515	2099	1490	-609	2.70986
Cenpf	NM_001081363	1984	280	-1704	2.14113
Cenpf	NM_001081363	1984	1075	-909	2.54183
Cenpf	NM_001081363	1984	1923	-61	2.96925
Cenpf	NM_001081363	1984	1585	-399	2.79889
Angel2	NM_021421	1399	275	-1124	2.19657
Angel2	NM_021421	1399	531	-868	2.37956
Ints7	NM_178632	2225	760	-1465	2.34157
Ints7	NM_178632	2225	812	-1413	2.36494
Ints7	NM_178632	2225	666	-1559	2.29933
Ints7	NM_178632	2225	2162	-63	2.97169
Ints7	NM_178632	2225	1521	-704	2.6836
Ints7	NM_178632	2225	257	-1968	2.11551
Ints7	NM_178632	2225	260	-1965	2.11685
Slc30a1	NM_009579	3491	181	-3310	2.05185
Slc30a1	NM_009579	3491	378	-3113	2.10828
Slc30a1	NM_009579	3491	2129	-1362	2.60985
Slc30a1	NM_009579	3491	1811	-1680	2.51876
Slc30a1	NM_009579	3491	2045	-1446	2.58579
Sertad4	NM_198247	1884	26	-1858	2.0138
Sertad4	NM_198247	1884	1016	-868	2.53928
Sertad4	NM_198247	1884	406	-1478	2.2155
Sertad4	NM_198247	1884	1450	-434	2.76964
Sertad4	NM_198247	1884	1113	-771	2.59076
Sertad4	NM_198247	1884	1880	-4	2.99788
Sertad4	NM_198247	1884	1771	-113	2.94002
Sertad4	NM_198247	1884	1717	-167	2.91136
Sertad4	NM_198247	1884	1300	-584	2.69002
Sertad4	NM_198247	1884	385	-1499	2.20435
Sertad4	NM_198247	1884	1628	-256	2.86412
Sertad4	NM_198247	1884	147	-1737	2.07803
Sertad4	NM_198247	1884	1707	-177	2.90605
Sertad4	NM_198247	1884	601	-1283	2.319
Sertad4	NM_198247	1884	323	-1561	2.17144
Irf6	NM_016851	2528	2435	-93	2.96321
Cnksr3	NM_172546	1225	210	-1015	2.17143
Cnksr3	NM_172546	1225	321	-904	2.26204
Lrp11	NM_172784	1692	1106	-586	2.65366
Lrp11	NM_172784	1692	1454	-238	2.85934
Ppil4	NM_026141	1359	407	-952	2.29948
Ppil4	NM_026141	1359	429	-930	2.31567
Ppil4	NM_026141	1359	918	-441	2.6755
Ppil4	NM_026141	1359	1119	-240	2.8234
Ppil4	NM_026141	1359	34	-1325	2.02502
Sash1	NM_175155	3277	797	-2480	2.24321
Sash1	NM_175155	3277	2543	-734	2.77601
Sash1	NM_175155	3277	489	-2788	2.14922
Shprh	NM_001077707	1728	1091	-637	2.63137
Fbxo30	NM_001168297	2548	2054	-494	2.80612
Fbxo30	NM_001168297	2548	2215	-333	2.86931
Utrn	NM_011682	1999	754	-1245	2.37719
Ltv1	NM_181470	247	211	-36	2.85425
Aig1	NM_001347362	613	276	-337	2.45024
Hivep2	NM_001358783	1641	959	-682	2.5844
Cited2	NM_010828	918	818	-100	2.89107
Heca	NM_001033432	1746	616	-1130	2.35281
Heca	NM_001033432	1746	483	-1263	2.27663
Heca	NM_001033432	1746	759	-987	2.43471
Heca	NM_001033432	1746	830	-916	2.47537
Heca	NM_001033432	1746	583	-1163	2.33391
Heca	NM_001033432	1746	948	-798	2.54296
Map3k5	NM_008580	1169	1088	-81	2.93071
Map3k5	NM_008580	1169	1054	-115	2.90163
Map3k5	NM_008580	1169	1093	-76	2.93499
Map3k5	NM_008580	1169	75	-1094	2.06416
Map3k5	NM_008580	1169	1095	-74	2.9367
Map3k5	NM_008580	1169	84	-1085	2.07186
Bclaf1	NM_001025392	2443	1093	-1350	2.4474
Bclaf1	NM_001025392	2443	1165	-1278	2.47687
Bclaf1	NM_001025392	2443	948	-1495	2.38805
Ahi1	NM_026203	1342	135	-1207	2.1006
Ahi1	NM_026203	1342	1073	-269	2.79955
Ahi1	NM_026203	1342	615	-727	2.45827
Sgk1	NM_001161850	1074	1002	-72	2.93296
Sgk1	NM_001161850	1074	323	-751	2.30074
Sgk1	NM_001161850	1074	861	-213	2.80168
Tbpl1	NM_011603	1938	997	-941	2.51445
Tbpl1	NM_011603	1938	1805	-133	2.93137
Tbpl1	NM_011603	1938	1026	-912	2.52941
Tbpl1	NM_011603	1938	1284	-654	2.66254
Stx7	NM_016797	1240	696	-544	2.56129
Stx7	NM_016797	1240	334	-906	2.26935
Stx7	NM_016797	1240	127	-1113	2.10242
Stx7	NM_016797	1240	980	-260	2.79032
Stx7	NM_016797	1240	74	-1166	2.05968
Stx7	NM_016797	1240	224	-1016	2.18065
Stx7	NM_016797	1240	320	-920	2.25806
Med23	NM_027347	701	312	-389	2.44508
Med23	NM_027347	701	421	-280	2.60057
Med23	NM_027347	701	16	-685	2.02282
Epb41l2	NM_001358751	1222	276	-946	2.22586
Epb41l2	NM_001358751	1222	662	-560	2.54173
Epb41l2	NM_001358751	1222	392	-830	2.32079
Epb41l2	NM_001358751	1222	331	-891	2.27087
Epb41l2	NM_001358751	1222	991	-231	2.81097
Echdc1	NM_025855	1911	89	-1822	2.04657
Rnf146	NM_001110198	2632	14	-2618	2.00532
Trmt11	NM_028604	887	637	-250	2.71815
Tspyl1	NM_009433	1464	134	-1330	2.09153
Tspyl1	NM_009433	1464	413	-1051	2.2821
Tspyl1	NM_009433	1464	130	-1334	2.0888
Tspyl1	NM_009433	1464	584	-880	2.39891
Tspyl1	NM_009433	1464	856	-608	2.5847
Tspyl1	NM_009433	1464	701	-763	2.47883
Tspyl1	NM_009433	1464	904	-560	2.61749
Tspyl1	NM_009433	1464	1446	-18	2.9877
Tspyl1	NM_009433	1464	625	-839	2.42691
Hdac2	NM_008229	328	241	-87	2.73476
Tube1	NM_028006	1440	736	-704	2.51111
Fyn	NM_001122893	1401	1269	-132	2.90578
Cdc40	NM_027879	1556	1484	-72	2.95373
Wasf1	NM_031877	765	619	-146	2.80915
Wasf1	NM_031877	765	447	-318	2.58431
Wasf1	NM_031877	765	664	-101	2.86797
Wasf1	NM_031877	765	322	-443	2.42092
Cd164	NM_016898	2200	359	-1841	2.16318
Cd164	NM_016898	2200	2085	-115	2.94773
Cd164	NM_016898	2200	2012	-188	2.91455
Cd164	NM_016898	2200	1584	-616	2.72
Cd164	NM_016898	2200	2163	-37	2.98318
Cd164	NM_016898	2200	1622	-578	2.73727
Cd164	NM_016898	2200	1924	-276	2.87455
Cd164	NM_016898	2200	2084	-116	2.94727
Cd164	NM_016898	2200	1382	-818	2.62818
Cd164	NM_016898	2200	29	-2171	2.01318
Cd164	NM_016898	2200	1163	-1037	2.52864
Cd164	NM_016898	2200	662	-1538	2.30091
Cd164	NM_016898	2200	1055	-1145	2.47955
Cd164	NM_016898	2200	1966	-234	2.89364
Cd164	NM_016898	2200	2089	-111	2.94955
Cd164	NM_016898	2200	2005	-195	2.91136
Cd164	NM_016898	2200	1769	-431	2.80409
Cd164	NM_016898	2200	896	-1304	2.40727
Cd164	NM_016898	2200	735	-1465	2.33409
Cd164	NM_016898	2200	1028	-1172	2.46727
Cd164	NM_016898	2200	1583	-617	2.71955
Cd164	NM_016898	2200	1992	-208	2.90545
Cd164	NM_016898	2200	1188	-1012	2.54
Cd164	NM_016898	2200	1780	-420	2.80909
Cd164	NM_016898	2200	1784	-416	2.81091
Cd164	NM_016898	2200	1320	-880	2.6
Cd164	NM_016898	2200	1633	-567	2.74227
Cd164	NM_016898	2200	476	-1724	2.21636
Cd164	NM_016898	2200	120	-2080	2.05455
Cd164	NM_016898	2200	2104	-96	2.95636
Cd164	NM_016898	2200	557	-1643	2.25318
Cd164	NM_016898	2200	1569	-631	2.71318
Cd164	NM_016898	2200	1706	-494	2.77545
Cd164	NM_016898	2200	726	-1474	2.33
Cd164	NM_016898	2200	719	-1481	2.32682
Cd164	NM_016898	2200	121	-2079	2.055
Cd164	NM_016898	2200	2084	-116	2.94727
Cd164	NM_016898	2200	275	-1925	2.125
Cd164	NM_016898	2200	1433	-767	2.65136
Cd164	NM_016898	2200	1062	-1138	2.48273
Cd164	NM_016898	2200	763	-1437	2.34682
Cd164	NM_016898	2200	1926	-274	2.87545
Cd164	NM_016898	2200	1185	-1015	2.53864
Cd164	NM_016898	2200	420	-1780	2.19091
Cd164	NM_016898	2200	328	-1872	2.14909
Snx3	NM_017472	610	52	-558	2.08525
Snx3	NM_017472	610	142	-468	2.23279
Cd24a	NM_009846	1499	1242	-257	2.82855
Crybg1	NM_172393	1561	1202	-359	2.77002
Crybg1	NM_172393	1561	954	-607	2.61115
Crybg1	NM_172393	1561	1057	-504	2.67713
Crybg1	NM_172393	1561	381	-1180	2.24407
Crybg1	NM_172393	1561	938	-623	2.6009
Atg5	NM_053069	1246	569	-677	2.45666
Atg5	NM_053069	1246	784	-462	2.62921
Atg5	NM_053069	1246	253	-993	2.20305
Prep	NM_011156	4224	3640	-584	2.86174
Lin28b	NM_001031772	4445	2172	-2273	2.48864
Ascc3	NM_198007	608	531	-77	2.87336
Gopc	NM_053187	2698	219	-2479	2.08117
Asf1a	NM_025541	1337	755	-582	2.5647
Asf1a	NM_025541	1337	188	-1149	2.14061
Asf1a	NM_025541	1337	208	-1129	2.15557
Msl3l2	NM_001163833	583	70	-513	2.12007
Hsf2	NM_008297	944	602	-342	2.63771
Hsf2	NM_008297	944	894	-50	2.94703
Hsf2	NM_008297	944	740	-204	2.7839
Hsf2	NM_008297	944	679	-265	2.71928
Hsf2	NM_008297	944	56	-888	2.05932
Hsf2	NM_008297	944	438	-506	2.46398
Ranbp2	NM_011240	185	31	-154	2.16757
Ranbp2	NM_011240	185	152	-33	2.82162
Ranbp2	NM_011240	185	13	-172	2.07027
Ranbp2	NM_011240	185	134	-51	2.72432
Ranbp2	NM_011240	185	66	-119	2.35676
Ranbp2	NM_011240	185	113	-72	2.61081
Ranbp2	NM_011240	185	129	-56	2.6973
Ranbp2	NM_011240	185	8	-177	2.04324
Ccdc138	NM_001162956	389	252	-137	2.64781
Ddit4	NM_029083	860	177	-683	2.20581
Ddit4	NM_029083	860	183	-677	2.21279
Ddit4	NM_029083	860	694	-166	2.80698
Ddit4	NM_029083	860	849	-11	2.98721
Ddit4	NM_029083	860	143	-717	2.16628
Ddit4	NM_029083	860	852	-8	2.9907
Ddit4	NM_029083	860	105	-755	2.12209
Psap	NM_011179	870	563	-307	2.64713
Psap	NM_011179	870	688	-182	2.7908
Psap	NM_011179	870	108	-762	2.12414
Psap	NM_011179	870	859	-11	2.98736
Psap	NM_011179	870	215	-655	2.24713
Psap	NM_011179	870	94	-776	2.10805
Sgpl1	NM_009163	2225	1063	-1162	2.47775
Sgpl1	NM_009163	2225	1995	-230	2.89663
Pald1	NM_013753	1432	162	-1270	2.11313
Pald1	NM_013753	1432	1372	-60	2.9581
Eif4ebp2	NM_010124	1299	755	-544	2.58122
Ppa1	NM_026438	314	242	-72	2.7707
Sar1a	NM_001358487	1895	252	-1643	2.13298
H2afy2	NM_207000	649	269	-380	2.41448
H2afy2	NM_207000	649	262	-387	2.4037
H2afy2	NM_207000	649	443	-206	2.68259
Vps26a	NM_133672	1901	1126	-775	2.59232
Vps26a	NM_133672	1901	769	-1132	2.40452
Vps26a	NM_133672	1901	618	-1283	2.32509
Vps26a	NM_133672	1901	874	-1027	2.45976
Vps26a	NM_133672	1901	856	-1045	2.45029
Vps26a	NM_133672	1901	842	-1059	2.44292
Kif1bp	NM_028197	537	6	-531	2.01117
Ddx21	NM_019553	2102	1723	-379	2.8197
Ddx21	NM_019553	2102	478	-1624	2.2274
Ddx50	NM_001358819	445	233	-212	2.5236
Ccar1	NM_026201	834	152	-682	2.18225
Ccar1	NM_026201	834	566	-268	2.67866
Ccar1	NM_026201	834	200	-634	2.23981
Sirt1	NM_001159589	1630	346	-1284	2.21227
Dnajc12	NM_013888	556	16	-540	2.02878
Jmjd1c	NM_207221	788	747	-41	2.94797
Jmjd1c	NM_207221	788	692	-96	2.87817
Jmjd1c	NM_207221	788	405	-383	2.51396
Egr2	NM_010118	1199	97	-1102	2.0809
Ado	NM_001005419	3491	1261	-2230	2.36121
Rtkn2	NM_001359318	1946	99	-1847	2.05087
Rhobtb1	NM_001252637	2094	1781	-313	2.85053
Ccdc6	NM_001111121	3921	158	-3763	2.0403
Ccdc6	NM_001111121	3921	1054	-2867	2.26881
Ccdc6	NM_001111121	3921	3725	-196	2.95001
Ccdc6	NM_001111121	3921	3219	-702	2.82096
Ccdc6	NM_001111121	3921	3354	-567	2.85539
Ccdc6	NM_001111121	3921	1683	-2238	2.42923
Ccdc6	NM_001111121	3921	2823	-1098	2.71997
Ccdc6	NM_001111121	3921	290	-3631	2.07396
Ccdc6	NM_001111121	3921	3899	-22	2.99439
Ccdc6	NM_001111121	3921	620	-3301	2.15812
Ccdc6	NM_001111121	3921	1071	-2850	2.27314
Ccdc6	NM_001111121	3921	3874	-47	2.98801
Ccdc6	NM_001111121	3921	742	-3179	2.18924
Ccdc6	NM_001111121	3921	2438	-1483	2.62178
Ccdc6	NM_001111121	3921	1728	-2193	2.4407
Ccdc6	NM_001111121	3921	923	-2998	2.2354
Bicc1	NM_031397	2414	1155	-1259	2.47846
Tfam	NM_009360	3081	1165	-1916	2.37812
Ipmk	NM_027184	4066	3381	-685	2.83153
Zwint	NM_001293683	1000	171	-829	2.171
Zwint	NM_001293683	1000	932	-68	2.932
Bcr	NM_001081412	2593	1734	-859	2.66872
Specc1l	NM_001145826	2520	1590	-930	2.63095
Specc1l	NM_001145826	2520	159	-2361	2.0631
Snrpd3	NM_026095	117	54	-63	2.46154
Mif	NM_010798	123	96	-27	2.78049
Zfp280b	NM_177475	3075	2450	-625	2.79675
Sumo3	NM_019929	2072	854	-1218	2.41216
Sumo3	NM_019929	2072	870	-1202	2.41988
Sumo3	NM_019929	2072	169	-1903	2.08156
Sumo3	NM_019929	2072	712	-1360	2.34363
Sumo3	NM_019929	2072	1982	-90	2.95656
Sumo3	NM_019929	2072	1153	-919	2.55647
Sumo3	NM_019929	2072	1284	-788	2.61969
Sumo3	NM_019929	2072	1932	-140	2.93243
Sumo3	NM_019929	2072	1018	-1054	2.49131
Sumo3	NM_019929	2072	1246	-826	2.60135
Sumo3	NM_019929	2072	1088	-984	2.5251
Sumo3	NM_019929	2072	1460	-612	2.70463
Sumo3	NM_019929	2072	1438	-634	2.69402
Sumo3	NM_019929	2072	1077	-995	2.51979
Sumo3	NM_019929	2072	841	-1231	2.40589
Sumo3	NM_019929	2072	619	-1453	2.29875
Sumo3	NM_019929	2072	1179	-893	2.56902
Sumo3	NM_019929	2072	1615	-457	2.77944
Sumo3	NM_019929	2072	380	-1692	2.1834
Ptbp1	NM_001077363	1157	1088	-69	2.94036
Ptbp1	NM_001077363	1157	488	-669	2.42178
Polr2e	NM_025554	354	309	-45	2.87288
Polr2e	NM_025554	354	199	-155	2.56215
Midn	NM_001305798	1725	1434	-291	2.8313
Midn	NM_001305798	1725	812	-913	2.47072
Cirbp	NM_007705	657	655	-2	2.99696
Cirbp	NM_007705	657	355	-302	2.54033
Cirbp	NM_007705	657	503	-154	2.7656
Cirbp	NM_007705	657	530	-127	2.8067
Cirbp	NM_007705	657	341	-316	2.51903
Cirbp	NM_007705	657	382	-275	2.58143
Cirbp	NM_007705	657	171	-486	2.26027
Cirbp	NM_007705	657	128	-529	2.19482
Cirbp	NM_007705	657	440	-217	2.66971
Cirbp	NM_007705	657	141	-516	2.21461
Cirbp	NM_007705	657	400	-257	2.60883
Cirbp	NM_007705	657	173	-484	2.26332
Cirbp	NM_007705	657	147	-510	2.22374
Cirbp	NM_007705	657	621	-36	2.94521
Cirbp	NM_007705	657	290	-367	2.4414
Cirbp	NM_007705	657	15	-642	2.02283
Cirbp	NM_007705	657	96	-561	2.14612
Cirbp	NM_007705	657	214	-443	2.32572
Cirbp	NM_007705	657	412	-245	2.62709
Cirbp	NM_007705	657	535	-122	2.81431
Cirbp	NM_007705	657	130	-527	2.19787
Cirbp	NM_007705	657	466	-191	2.70928
Cirbp	NM_007705	657	596	-61	2.90715
Cirbp	NM_007705	657	318	-339	2.48402
Cirbp	NM_007705	657	509	-148	2.77473
Cirbp	NM_007705	657	342	-315	2.52055
Cirbp	NM_007705	657	78	-579	2.11872
Cirbp	NM_007705	657	217	-440	2.33029
Cirbp	NM_007705	657	92	-565	2.14003
Cirbp	NM_007705	657	111	-546	2.16895
Cirbp	NM_007705	657	512	-145	2.7793
Cirbp	NM_007705	657	55	-602	2.08371
Cirbp	NM_007705	657	273	-384	2.41553
Pwwp3a	NM_023431	1500	1378	-122	2.91867
Pwwp3a	NM_023431	1500	1455	-45	2.97
Pwwp3a	NM_023431	1500	208	-1292	2.13867
Dazap1	NM_133188	701	135	-566	2.19258
Mex3d	NM_198615	869	110	-759	2.12658
Mex3d	NM_198615	869	619	-250	2.71231
Mex3d	NM_198615	869	636	-233	2.73188
Tcf3	NM_001164149	966	526	-440	2.54451
Tcf3	NM_001164149	966	819	-147	2.84783
Tcf3	NM_001164149	966	380	-586	2.39337
Tcf3	NM_001164149	966	760	-206	2.78675
Tcf3	NM_001164149	966	23	-943	2.02381
Abhd17a	NM_145421	188	89	-99	2.4734
Scamp4	NM_019575	999	695	-304	2.6957
Mknk2	NM_021462	1788	1102	-686	2.61633
Mknk2	NM_021462	1788	868	-920	2.48546
Mknk2	NM_021462	1788	1548	-240	2.86577
Dot1l	NM_199322	1946	409	-1537	2.21017
Plekhj1	NM_023900	312	45	-267	2.14423
Lsm7	NM_001359149	132	51	-81	2.38636
Sgta	NM_001358550	937	186	-751	2.19851
Pip5k1c	NM_001146687	2205	705	-1500	2.31973
Gna11	NM_010301	2070	1646	-424	2.79517
Nfyb	NM_010914	1714	1395	-319	2.81389
Nfyb	NM_010914	1714	83	-1631	2.04842
D10Wsu102e	NM_026579	2912	399	-2513	2.13702
D10Wsu102e	NM_026579	2912	1533	-1379	2.52644
D10Wsu102e	NM_026579	2912	1561	-1351	2.53606
D10Wsu102e	NM_026579	2912	1230	-1682	2.42239
D10Wsu102e	NM_026579	2912	177	-2735	2.06078
D10Wsu102e	NM_026579	2912	691	-2221	2.23729
Polr3b	NM_027423	1397	1365	-32	2.97709
Polr3b	NM_027423	1397	955	-442	2.68361
Polr3b	NM_027423	1397	1177	-220	2.84252
Polr3b	NM_027423	1397	1144	-253	2.8189
Polr3b	NM_027423	1397	587	-810	2.42019
Polr3b	NM_027423	1397	194	-1203	2.13887
Cry1	NM_007771	611	131	-480	2.2144
Cry1	NM_007771	611	566	-45	2.92635
Cry1	NM_007771	611	526	-85	2.86088
Pwp1	NM_133993	960	836	-124	2.87083
Pwp1	NM_133993	960	394	-566	2.41042
Pwp1	NM_133993	960	763	-197	2.79479
Pwp1	NM_133993	960	443	-517	2.46146
Pwp1	NM_133993	960	888	-72	2.925
Prdm4	NM_001302886	1161	1073	-88	2.9242
Hsp90b1	NM_011631	260	98	-162	2.37692
Sycp3	NM_011517	277	200	-77	2.72202
Sycp3	NM_011517	277	272	-5	2.98195
Sycp3	NM_011517	277	141	-136	2.50903
Sycp3	NM_011517	277	190	-87	2.68592
Sycp3	NM_011517	277	205	-72	2.74007
Sycp3	NM_011517	277	192	-85	2.69314
Sycp3	NM_011517	277	80	-197	2.28881
Sycp3	NM_011517	277	59	-218	2.213
Sycp3	NM_011517	277	63	-214	2.22744
Sycp3	NM_011517	277	161	-116	2.58123
Sycp3	NM_011517	277	195	-82	2.70397
Sycp3	NM_011517	277	54	-223	2.19495
Gas2l3	NM_001284344	4339	2210	-2129	2.50933
Actr6	NM_025914	462	38	-424	2.08225
Actr6	NM_025914	462	212	-250	2.45887
Tmpo	NM_011605	1424	1307	-117	2.91784
Tmpo	NM_011605	1424	144	-1280	2.10112
Cdk17	NM_146239	1716	396	-1320	2.23077
Cdk17	NM_146239	1716	1052	-664	2.61305
Cdk17	NM_146239	1716	1316	-400	2.7669
Cdk17	NM_146239	1716	1399	-317	2.81527
Cdk17	NM_146239	1716	1484	-232	2.8648
Cdk17	NM_146239	1716	105	-1611	2.06119
Cdk17	NM_146239	1716	898	-818	2.52331
Cdk17	NM_146239	1716	355	-1361	2.20688
Cdk17	NM_146239	1716	270	-1446	2.15734
Cdk17	NM_146239	1716	1566	-150	2.91259
Cdk17	NM_146239	1716	1598	-118	2.93124
Cdk17	NM_146239	1716	387	-1329	2.22552
Cdk17	NM_146239	1716	1047	-669	2.61014
Snrpf	NM_027246	434	98	-336	2.22581
Metap2	NM_019648	2859	469	-2390	2.16404
Metap2	NM_019648	2859	2340	-519	2.81847
Metap2	NM_019648	2859	620	-2239	2.21686
Fgd6	NM_053072	3549	2894	-655	2.81544
Fgd6	NM_053072	3549	925	-2624	2.26064
Fgd6	NM_053072	3549	1568	-1981	2.44181
Tmcc3	NM_001359762	3923	3174	-749	2.80907
Tmcc3	NM_001359762	3923	1315	-2608	2.3352
Nudt4	NM_027722	2280	627	-1653	2.275
Nudt4	NM_027722	2280	1876	-404	2.82281
Atp2b1	NM_026482	3023	922	-2101	2.305
Atp2b1	NM_026482	3023	2253	-770	2.74529
Atp2b1	NM_026482	3023	2382	-641	2.78796
Atp2b1	NM_026482	3023	2817	-206	2.93186
Atp2b1	NM_026482	3023	965	-2058	2.31922
Atp2b1	NM_026482	3023	658	-2365	2.21766
Atp2b1	NM_026482	3023	2744	-279	2.90771
Atp2b1	NM_026482	3023	1854	-1169	2.6133
Tmtc3	NM_001110013	3026	2891	-135	2.95539
Tmtc3	NM_001110013	3026	2721	-305	2.89921
Ppp1r12a	NM_027892	2797	2133	-664	2.7626
Ppp1r12a	NM_027892	2797	558	-2239	2.1995
Pawr	NM_054056	636	438	-198	2.68868
Pawr	NM_054056	636	554	-82	2.87107
Nap1l1	NM_015781	1426	1135	-291	2.79593
Krr1	NM_178610	3748	2679	-1069	2.71478
Atxn7l3b	NM_001033474	3000	1157	-1843	2.38567
Atxn7l3b	NM_001033474	3000	286	-2714	2.09533
Atxn7l3b	NM_001033474	3000	2322	-678	2.774
Atxn7l3b	NM_001033474	3000	962	-2038	2.32067
Atxn7l3b	NM_001033474	3000	2083	-917	2.69433
Atxn7l3b	NM_001033474	3000	374	-2626	2.12467
Atxn7l3b	NM_001033474	3000	157	-2843	2.05233
Atxn7l3b	NM_001033474	3000	142	-2858	2.04733
Atxn7l3b	NM_001033474	3000	969	-2031	2.323
Atxn7l3b	NM_001033474	3000	1888	-1112	2.62933
Atxn7l3b	NM_001033474	3000	1347	-1653	2.449
Atxn7l3b	NM_001033474	3000	2494	-506	2.83133
Atxn7l3b	NM_001033474	3000	2514	-486	2.838
Rab21	NM_024454	909	650	-259	2.71507
Tmem19	NM_001359470	1765	1721	-44	2.97507
Tmem19	NM_001359470	1765	1042	-723	2.59037
Taf7l2	NM_001161855	818	773	-45	2.94499
Taf7l2	NM_001161855	818	487	-331	2.59535
Cct2	NM_001358767	248	168	-80	2.67742
Cct2	NM_001358767	248	60	-188	2.24194
Cct2	NM_001358767	248	137	-111	2.55242
Frs2	NM_177798	3801	2278	-1523	2.59932
Frs2	NM_177798	3801	784	-3017	2.20626
Frs2	NM_177798	3801	3043	-758	2.80058
Frs2	NM_177798	3801	222	-3579	2.05841
Frs2	NM_177798	3801	1705	-2096	2.44857
Yeats4	NM_026570	525	429	-96	2.81714
Yeats4	NM_026570	525	104	-421	2.1981
Yeats4	NM_026570	525	428	-97	2.81524
Yeats4	NM_026570	525	471	-54	2.89714
Yeats4	NM_026570	525	69	-456	2.13143
Yeats4	NM_026570	525	403	-122	2.76762
Yeats4	NM_026570	525	403	-122	2.76762
Yeats4	NM_026570	525	360	-165	2.68571
Yeats4	NM_026570	525	478	-47	2.91048
Cpsf6	NM_001013391	4802	3505	-1297	2.7299
Cpsf6	NM_001013391	4802	2518	-2284	2.52436
Cpsf6	NM_001013391	4802	1081	-3721	2.22511
Cpsf6	NM_001013391	4802	1369	-3433	2.28509
Cpsf6	NM_001013391	4802	2068	-2734	2.43065
Cpsf6	NM_001013391	4802	4031	-771	2.83944
Cpsf6	NM_001013391	4802	823	-3979	2.17139
Cpsf6	NM_001013391	4802	3118	-1684	2.64931
Mdm2	NM_010786	1334	358	-976	2.26837
Mdm2	NM_010786	1334	1221	-113	2.91529
Mdm2	NM_010786	1334	92	-1242	2.06897
Mdm2	NM_010786	1334	1289	-45	2.96627
Mdm2	NM_010786	1334	1328	-6	2.9955
Mdm2	NM_010786	1334	167	-1167	2.12519
Mdm2	NM_010786	1334	1008	-326	2.75562
Mdm2	NM_010786	1334	1099	-235	2.82384
Nup107	NM_134010	216	4	-212	2.01852
Nup107	NM_134010	216	38	-178	2.17593
Nup107	NM_134010	216	39	-177	2.18056
Rap1b	NM_024457	1213	1207	-6	2.99505
Rap1b	NM_024457	1213	91	-1122	2.07502
Rap1b	NM_024457	1213	666	-547	2.54905
Rap1b	NM_024457	1213	589	-624	2.48557
Rap1b	NM_024457	1213	752	-461	2.61995
Rap1b	NM_024457	1213	84	-1129	2.06925
Rap1b	NM_024457	1213	801	-412	2.66035
Cand1	NM_027994	4168	896	-3272	2.21497
Cand1	NM_027994	4168	3860	-308	2.9261
Cand1	NM_027994	4168	3091	-1077	2.7416
Cand1	NM_027994	4168	2139	-2029	2.5132
Lemd3	NM_001081193	1981	793	-1188	2.4003
Lemd3	NM_001081193	1981	522	-1459	2.2635
Rassf3	NM_138956	2584	132	-2452	2.05108
Rassf3	NM_138956	2584	1683	-901	2.65132
Rassf3	NM_138956	2584	489	-2095	2.18924
Rassf3	NM_138956	2584	1312	-1272	2.50774
Rassf3	NM_138956	2584	968	-1616	2.37461
Rassf3	NM_138956	2584	2254	-330	2.87229
Rassf3	NM_138956	2584	1028	-1556	2.39783
Rassf3	NM_138956	2584	803	-1781	2.31076
Rassf3	NM_138956	2584	1443	-1141	2.55844
Rassf3	NM_138956	2584	408	-2176	2.15789
Rassf3	NM_138956	2584	1779	-805	2.68847
Rassf3	NM_138956	2584	1056	-1528	2.40867
Rassf3	NM_138956	2584	1475	-1109	2.57082
Rassf3	NM_138956	2584	1052	-1532	2.40712
Rassf3	NM_138956	2584	2042	-542	2.79025
Rassf3	NM_138956	2584	637	-1947	2.24652
Xpot	NM_001359618	2813	455	-2358	2.16175
Xpot	NM_001359618	2813	236	-2577	2.0839
Xpot	NM_001359618	2813	429	-2384	2.15251
Xpot	NM_001359618	2813	613	-2200	2.21792
Xpot	NM_001359618	2813	559	-2254	2.19872
Xpot	NM_001359618	2813	1189	-1624	2.42268
Xpot	NM_001359618	2813	1020	-1793	2.3626
BC048403	NM_173022	1745	1522	-223	2.87221
Ctdsp2	NM_001113470	3488	2853	-635	2.81795
R3hdm2	NM_001359246	674	430	-244	2.63798
R3hdm2	NM_001359246	674	597	-77	2.88576
R3hdm2	NM_001359246	674	551	-123	2.81751
R3hdm2	NM_001359246	674	6	-668	2.0089
Shmt2	NM_028230	665	339	-326	2.50977
Shmt2	NM_028230	665	145	-520	2.21805
Nab2	NM_001122895	751	743	-8	2.98935
Stat6	NM_009284	1005	266	-739	2.26468
Nab2	NM_001122895	751	685	-66	2.91212
Ptges3	NM_019766	1167	254	-913	2.21765
Ptges3	NM_019766	1167	428	-739	2.36675
Ptges3	NM_019766	1167	741	-426	2.63496
Ptges3	NM_019766	1167	1097	-70	2.94002
Atp5b	NM_016774	268	141	-127	2.52612
Baz2a	NM_054078	2549	830	-1719	2.32562
Baz2a	NM_054078	2549	1780	-769	2.69831
Baz2a	NM_054078	2549	63	-2486	2.02472
Pan2	NM_001252326	592	50	-542	2.08446
Rnf41	NM_001164237	3006	282	-2724	2.09381
Rnf41	NM_001164237	3006	2316	-690	2.77046
Rnf41	NM_001164237	3006	1776	-1230	2.59082
Rnf41	NM_001164237	3006	1140	-1866	2.37924
Rps26	NM_013765	71	4	-67	2.05634
Cdk2	NM_016756	1166	1002	-164	2.85935
Cdk2	NM_016756	1166	372	-794	2.31904
Cdk2	NM_016756	1166	311	-855	2.26672
Cdk2	NM_016756	1166	552	-614	2.47341
Cdk2	NM_016756	1166	770	-396	2.66038
Cdk2	NM_016756	1166	668	-498	2.5729
Cdk2	NM_016756	1166	1072	-94	2.91938
Cdk2	NM_016756	1166	109	-1057	2.09348
Cdk2	NM_016756	1166	359	-807	2.30789
Cdk2	NM_016756	1166	4	-1162	2.00343
Pym1	NM_001253704	952	155	-797	2.16282
Dnajc14	NM_001359825	2036	34	-2002	2.0167
Ormdl2	NM_001359170	977	234	-743	2.23951
Sarnp	NM_001359406	263	237	-26	2.90114
Eif4enif1	NM_001166547	498	186	-312	2.37349
Eif4enif1	NM_001166547	498	248	-250	2.49799
Eif4enif1	NM_001166547	498	465	-33	2.93373
Patz1	NM_019574	1016	991	-25	2.97539
Patz1	NM_019574	1016	4	-1012	2.00394
Patz1	NM_019574	1016	54	-962	2.05315
Patz1	NM_019574	1016	794	-222	2.7815
Patz1	NM_019574	1016	592	-424	2.58268
Patz1	NM_019574	1016	815	-201	2.80217
Patz1	NM_019574	1016	939	-77	2.92421
Patz1	NM_019574	1016	890	-126	2.87598
Patz1	NM_019574	1016	712	-304	2.70079
Patz1	NM_019574	1016	686	-330	2.6752
Patz1	NM_019574	1016	142	-874	2.13976
Patz1	NM_019574	1016	46	-970	2.04528
Patz1	NM_019574	1016	744	-272	2.73228
Morc2a	NM_001363202	1373	228	-1145	2.16606
Sf3a1	NM_026175	2405	909	-1496	2.37796
Sf3a1	NM_026175	2405	127	-2278	2.05281
Sf3a1	NM_026175	2405	1421	-984	2.59085
Sf3a1	NM_026175	2405	1291	-1114	2.5368
Sf3a1	NM_026175	2405	528	-1877	2.21954
Sf3a1	NM_026175	2405	2169	-236	2.90187
Sf3a1	NM_026175	2405	773	-1632	2.32141
Sf3a1	NM_026175	2405	469	-1936	2.19501
Sf3a1	NM_026175	2405	1045	-1360	2.43451
Sf3a1	NM_026175	2405	837	-1568	2.34802
Sf3a1	NM_026175	2405	865	-1540	2.35967
Mtmr3	NM_028860	1899	728	-1171	2.38336
Mtmr3	NM_028860	1899	615	-1284	2.32385
Mtmr3	NM_028860	1899	1523	-376	2.802
Mtmr3	NM_028860	1899	15	-1884	2.0079
Mtmr3	NM_028860	1899	1575	-324	2.82938
Ewsr1	NM_001283062	376	217	-159	2.57713
Znrf3	NM_001290501	4464	695	-3769	2.15569
Ccdc117	NM_134033	2407	1677	-730	2.69672
Ccdc117	NM_134033	2407	2175	-232	2.90361
Ccdc117	NM_134033	2407	2053	-354	2.85293
Ccdc117	NM_134033	2407	306	-2101	2.12713
Ykt6	NM_019661	1736	307	-1429	2.17684
Nudcd3	NM_173748	2552	2537	-15	2.99412
Ogdh	NM_001252288	3419	3000	-419	2.87745
H2afv	NM_029938	1144	370	-774	2.32343
H2afv	NM_029938	1144	730	-414	2.63811
H2afv	NM_029938	1144	979	-165	2.85577
Fignl1	NM_021891	713	72	-641	2.10098
Fignl1	NM_021891	713	705	-8	2.98878
Fignl1	NM_021891	713	641	-72	2.89902
Grb10	NM_010345	2963	932	-2031	2.31455
Grb10	NM_010345	2963	1461	-1502	2.49308
Grb10	NM_010345	2963	2453	-510	2.82788
Grb10	NM_010345	2963	1325	-1638	2.44718
Grb10	NM_010345	2963	729	-2234	2.24603
Ppp3r1	NM_024459	2073	1236	-837	2.59624
Ppp3r1	NM_024459	2073	388	-1685	2.18717
Ppp3r1	NM_024459	2073	2014	-59	2.97154
Ppp3r1	NM_024459	2073	877	-1196	2.42306
Ppp3r1	NM_024459	2073	1995	-78	2.96237
Ppp3r1	NM_024459	2073	950	-1123	2.45827
Ppp3r1	NM_024459	2073	1023	-1050	2.49349
Ppp3r1	NM_024459	2073	213	-1860	2.10275
Ppp3r1	NM_024459	2073	1408	-665	2.67921
Ppp3r1	NM_024459	2073	1459	-614	2.70381
Ppp3r1	NM_024459	2073	1918	-155	2.92523
Ppp3r1	NM_024459	2073	1888	-185	2.91076
Ppp3r1	NM_024459	2073	1455	-618	2.70188
Ppp3r1	NM_024459	2073	616	-1457	2.29715
Ppp3r1	NM_024459	2073	1692	-381	2.81621
Ppp3r1	NM_024459	2073	89	-1984	2.04293
Ppp3r1	NM_024459	2073	959	-1114	2.46261
Ppp3r1	NM_024459	2073	1604	-469	2.77376
Ppp3r1	NM_024459	2073	1193	-880	2.57549
Ppp3r1	NM_024459	2073	606	-1467	2.29233
Ppp3r1	NM_024459	2073	43	-2030	2.02074
Ppp3r1	NM_024459	2073	1461	-612	2.70478
Ppp3r1	NM_024459	2073	1767	-306	2.85239
Ppp3r1	NM_024459	2073	46	-2027	2.02219
C1d	NM_001330649	2480	1477	-1003	2.59556
C1d	NM_001330649	2480	866	-1614	2.34919
C1d	NM_001330649	2480	2074	-406	2.83629
C1d	NM_001330649	2480	2436	-44	2.98226
C1d	NM_001330649	2480	596	-1884	2.24032
C1d	NM_001330649	2480	1028	-1452	2.41452
Etaa1	NM_026576	1472	1003	-469	2.68139
Rab1a	NM_008996	2010	795	-1215	2.39552
Rab1a	NM_008996	2010	215	-1795	2.10697
Rab1a	NM_008996	2010	843	-1167	2.4194
Rab1a	NM_008996	2010	72	-1938	2.03582
Rab1a	NM_008996	2010	1704	-306	2.84776
Rab1a	NM_008996	2010	795	-1215	2.39552
Rab1a	NM_008996	2010	1626	-384	2.80896
Rab1a	NM_008996	2010	520	-1490	2.25871
Rab1a	NM_008996	2010	902	-1108	2.44876
Rab1a	NM_008996	2010	997	-1013	2.49602
Rab1a	NM_008996	2010	109	-1901	2.05423
Rab1a	NM_008996	2010	419	-1591	2.20846
Rab1a	NM_008996	2010	977	-1033	2.48607
Rab1a	NM_008996	2010	23	-1987	2.01144
Rab1a	NM_008996	2010	1677	-333	2.83433
Rab1a	NM_008996	2010	1371	-639	2.68209
Rab1a	NM_008996	2010	662	-1348	2.32935
Lgalsl	NM_173752	3016	690	-2326	2.22878
Lgalsl	NM_173752	3016	1625	-1391	2.53879
Peli1	NM_023324	1803	1228	-575	2.68109
Peli1	NM_023324	1803	11	-1792	2.0061
Peli1	NM_023324	1803	32	-1771	2.01775
Peli1	NM_023324	1803	8	-1795	2.00444
Vps54	NM_001290628	1274	1237	-37	2.97096
Zrsr1	NM_011663	1981	425	-1556	2.21454
Zrsr1	NM_011663	1981	1566	-415	2.79051
Zrsr1	NM_011663	1981	363	-1618	2.18324
Zrsr1	NM_011663	1981	652	-1329	2.32913
Zrsr1	NM_011663	1981	406	-1575	2.20495
Cct4	NM_009837	184	174	-10	2.94565
Xpo1	NM_134014	1489	790	-699	2.53056
Xpo1	NM_134014	1489	930	-559	2.62458
Xpo1	NM_134014	1489	384	-1105	2.25789
Xpo1	NM_134014	1489	441	-1048	2.29617
Xpo1	NM_134014	1489	1228	-261	2.82471
Xpo1	NM_134014	1489	1139	-350	2.76494
Xpo1	NM_134014	1489	222	-1267	2.14909
Xpo1	NM_134014	1489	171	-1318	2.11484
Xpo1	NM_134014	1489	40	-1449	2.02686
Ahsa2	NM_001290654	2515	2316	-199	2.92087
Usp34	NM_001190401	1371	693	-678	2.50547
Ahsa2	NM_001290654	2515	2200	-315	2.87475
Usp34	NM_001190401	1371	722	-649	2.52662
Ahsa2	NM_001290654	2515	2202	-313	2.87555
Usp34	NM_001190401	1371	606	-765	2.44201
Ahsa2	NM_001290654	2515	196	-2319	2.07793
Usp34	NM_001190401	1371	957	-414	2.69803
Pex13	NM_023651	2008	1829	-179	2.91086
Papolg	NM_172555	1311	81	-1230	2.06178
Papolg	NM_172555	1311	729	-582	2.55606
Rtn4	NM_194054	2384	809	-1575	2.33935
Sptbn1	NM_175836	1100	693	-407	2.63
Sptbn1	NM_175836	1100	83	-1017	2.07545
Sptbn1	NM_175836	1100	553	-547	2.50273
Sptbn1	NM_175836	1100	415	-685	2.37727
Sptbn1	NM_175836	1100	898	-202	2.81636
Sptbn1	NM_175836	1100	5	-1095	2.00455
Asb3	NM_023906	1461	812	-649	2.55578
Bod1	NM_001024919	718	620	-98	2.86351
Bod1	NM_001024919	718	717	-1	2.99861
Bod1	NM_001024919	718	191	-527	2.26602
Bod1	NM_001024919	718	182	-536	2.25348
Cpeb4	NM_001290676	4102	410	-3692	2.09995
Ubtd2	NM_173784	2221	1813	-408	2.8163
Ubtd2	NM_173784	2221	2006	-215	2.9032
Ubtd2	NM_173784	2221	158	-2063	2.07114
Ubtd2	NM_173784	2221	646	-1575	2.29086
Ubtd2	NM_173784	2221	2174	-47	2.97884
Ubtd2	NM_173784	2221	247	-1974	2.11121
Ubtd2	NM_173784	2221	1734	-487	2.78073
Fbxw11	NM_001271349	2308	571	-1737	2.2474
Fbxw11	NM_001271349	2308	329	-1979	2.14255
Fbxw11	NM_001271349	2308	39	-2269	2.0169
Fbxw11	NM_001271349	2308	708	-1600	2.30676
Fbxw11	NM_001271349	2308	1522	-786	2.65945
Npm1	NM_008722	315	172	-143	2.54603
Slit3	NM_011412	364	116	-248	2.31868
Pank3	NM_145962	5826	3619	-2207	2.62118
Pank3	NM_145962	5826	2640	-3186	2.45314
Mat2b	NM_134017	709	391	-318	2.55148
Mat2b	NM_134017	709	30	-679	2.04231
Mat2b	NM_134017	709	304	-405	2.42877
Mat2b	NM_134017	709	373	-336	2.52609
Ccng1	NM_009831	2315	2186	-129	2.94428
Ccnjl	NM_001045530	1283	845	-438	2.65861
Ccnjl	NM_001045530	1283	581	-702	2.45284
Ccnjl	NM_001045530	1283	599	-684	2.46687
Ccnjl	NM_001045530	1283	1032	-251	2.80436
Clint1	NM_001045520	1337	37	-1300	2.02767
Clint1	NM_001045520	1337	912	-425	2.68212
Clint1	NM_001045520	1337	1206	-131	2.90202
Sox30	NM_173384	635	333	-302	2.52441
Med7	NM_025426	1439	125	-1314	2.08687
Rack1	NM_008143	195	172	-23	2.88205
Trim41	NM_145377	840	419	-421	2.49881
Cnot6	NM_001290741	3695	2147	-1548	2.58106
Sqstm1	NM_011018	637	155	-482	2.24333
Sqstm1	NM_011018	637	251	-386	2.39403
Sqstm1	NM_011018	637	452	-185	2.70958
Sqstm1	NM_011018	637	19	-618	2.02983
Sqstm1	NM_011018	637	503	-134	2.78964
Sqstm1	NM_011018	637	362	-275	2.56829
Canx	NM_001110499	2324	196	-2128	2.08434
Canx	NM_001110499	2324	1217	-1107	2.52367
Canx	NM_001110499	2324	366	-1958	2.15749
Canx	NM_001110499	2324	155	-2169	2.0667
Canx	NM_001110499	2324	1674	-650	2.72031
Canx	NM_001110499	2324	150	-2174	2.06454
Canx	NM_001110499	2324	1570	-754	2.67556
Canx	NM_001110499	2324	1212	-1112	2.52151
Canx	NM_001110499	2324	144	-2180	2.06196
Canx	NM_001110499	2324	918	-1406	2.39501
Canx	NM_001110499	2324	2315	-9	2.99613
Canx	NM_001110499	2324	895	-1429	2.38511
Canx	NM_001110499	2324	1402	-922	2.60327
Canx	NM_001110499	2324	119	-2205	2.0512
Canx	NM_001110499	2324	923	-1401	2.39716
Canx	NM_001110499	2324	203	-2121	2.08735
Canx	NM_001110499	2324	2191	-133	2.94277
Canx	NM_001110499	2324	544	-1780	2.23408
Canx	NM_001110499	2324	1979	-345	2.85155
Canx	NM_001110499	2324	1642	-682	2.70654
Hnrnph1	NM_001362523	751	171	-580	2.2277
Hnrnph1	NM_001362523	751	169	-582	2.22503
Hnrnph1	NM_001362523	751	315	-436	2.41944
Hnrnph1	NM_001362523	751	414	-337	2.55126
Hnrnph1	NM_001362523	751	506	-245	2.67377
Hnrnph1	NM_001362523	751	550	-201	2.73236
Hnrnpab	NM_010448	1307	69	-1238	2.05279
Hnrnpab	NM_010448	1307	571	-736	2.43688
Hnrnpab	NM_010448	1307	82	-1225	2.06274
Hnrnpab	NM_010448	1307	239	-1068	2.18286
Hnrnpab	NM_010448	1307	267	-1040	2.20428
Hnrnpab	NM_010448	1307	87	-1220	2.06656
Hnrnpab	NM_010448	1307	1056	-251	2.80796
Hnrnpab	NM_010448	1307	857	-450	2.6557
Hnrnpab	NM_010448	1307	264	-1043	2.20199
Hnrnpab	NM_010448	1307	384	-923	2.2938
Hnrnpab	NM_010448	1307	568	-739	2.43458
Jade2	NM_199299	3446	680	-2766	2.19733
Cdkn2aipnl	NM_029976	1424	1267	-157	2.88975
Cdkn2aipnl	NM_029976	1424	376	-1048	2.26404
Ube2b	NM_001362685	1543	129	-1414	2.0836
Ube2b	NM_001362685	1543	1079	-464	2.69929
Ube2b	NM_001362685	1543	1228	-315	2.79585
Ube2b	NM_001362685	1543	741	-802	2.48023
Ube2b	NM_001362685	1543	1331	-212	2.86261
Ube2b	NM_001362685	1543	1496	-47	2.96954
Ube2b	NM_001362685	1543	969	-574	2.628
Ube2b	NM_001362685	1543	309	-1234	2.20026
Ube2b	NM_001362685	1543	1334	-209	2.86455
Ppp2ca	NM_019411	774	262	-512	2.3385
Ppp2ca	NM_019411	774	702	-72	2.90698
Ppp2ca	NM_019411	774	107	-667	2.13824
Skp1a	NM_011543	837	549	-288	2.65591
Skp1a	NM_011543	837	416	-421	2.49701
Skp1a	NM_011543	837	546	-291	2.65233
Skp1a	NM_011543	837	560	-277	2.66906
Skp1a	NM_011543	837	528	-309	2.63082
Skp1a	NM_011543	837	29	-808	2.03465
Skp1a	NM_011543	837	717	-120	2.85663
Skp1a	NM_011543	837	301	-536	2.35962
Skp1a	NM_011543	837	663	-174	2.79211
Skp1a	NM_011543	837	678	-159	2.81004
Skp1a	NM_011543	837	593	-244	2.70848
Skp1a	NM_011543	837	237	-600	2.28315
Skp1a	NM_011543	837	650	-187	2.77658
Skp1a	NM_011543	837	490	-347	2.58542
Skp1a	NM_011543	837	811	-26	2.96894
Tcf7	NM_001313981	1599	791	-808	2.49468
Tcf7	NM_001313981	1599	146	-1453	2.09131
Tcf7	NM_001313981	1599	1519	-80	2.94997
Tcf7	NM_001313981	1599	361	-1238	2.22577
Tcf7	NM_001313981	1599	1049	-550	2.65604
Tcf7	NM_001313981	1599	1203	-396	2.75235
Tcf7	NM_001313981	1599	722	-877	2.45153
9530068E07Rik	NM_153117	1646	1464	-182	2.88943
9530068E07Rik	NM_153117	1646	531	-1115	2.3226
Hspa4	NM_008300	1797	1164	-633	2.64775
Hspa4	NM_008300	1797	483	-1314	2.26878
Hspa4	NM_008300	1797	1092	-705	2.60768
Zcchc10	NM_026479	707	662	-45	2.93635
Zcchc10	NM_026479	707	343	-364	2.48515
Zcchc10	NM_026479	707	152	-555	2.21499
Zcchc10	NM_026479	707	390	-317	2.55163
Zcchc10	NM_026479	707	44	-663	2.06223
Zcchc10	NM_026479	707	486	-221	2.68741
Fnip1	NM_173753	2664	2652	-12	2.9955
Fnip1	NM_173753	2664	229	-2435	2.08596
Cdc42se2	NM_178626	2325	1298	-1027	2.55828
Cdc42se2	NM_178626	2325	2133	-192	2.91742
Cdc42se2	NM_178626	2325	213	-2112	2.09161
Cdc42se2	NM_178626	2325	907	-1418	2.39011
G3bp1	NM_013716	1218	1031	-187	2.84647
G3bp1	NM_013716	1218	586	-632	2.48112
G3bp1	NM_013716	1218	1203	-15	2.98768
G3bp1	NM_013716	1218	665	-553	2.54598
G3bp1	NM_013716	1218	1056	-162	2.867
G3bp1	NM_013716	1218	246	-972	2.20197
G3bp1	NM_013716	1218	157	-1061	2.1289
G3bp1	NM_013716	1218	535	-683	2.43924
G3bp1	NM_013716	1218	566	-652	2.4647
G3bp1	NM_013716	1218	949	-269	2.77915
G3bp1	NM_013716	1218	490	-728	2.4023
Fam114a2	NM_001168668	1027	174	-853	2.16943
Fam114a2	NM_001168668	1027	25	-1002	2.02434
Fam114a2	NM_001168668	1027	639	-388	2.6222
Fam114a2	NM_001168668	1027	6	-1021	2.00584
Fam114a2	NM_001168668	1027	101	-926	2.09834
Fam114a2	NM_001168668	1027	294	-733	2.28627
Fam114a2	NM_001168668	1027	949	-78	2.92405
Fam114a2	NM_001168668	1027	540	-487	2.5258
Fam114a2	NM_001168668	1027	831	-196	2.80915
Larp1	NM_028451	3266	278	-2988	2.08512
Rnf187	NM_022423	1105	878	-227	2.79457
Hist3h2a	NM_178218	61	42	-19	2.68852
Arf1	NM_001130408	1121	469	-652	2.41838
Arf1	NM_001130408	1121	635	-486	2.56646
Arf1	NM_001130408	1121	347	-774	2.30955
Pld6	NM_001290283	1084	807	-277	2.74446
Pld6	NM_001290283	1084	333	-751	2.3072
Flcn	NM_146018	1201	545	-656	2.45379
Flcn	NM_146018	1201	825	-376	2.68693
Rai1	NM_009021	1149	817	-332	2.71105
Rai1	NM_009021	1149	560	-589	2.48738
Srebf1	NM_001358314	837	69	-768	2.08244
Rai1	NM_009021	1149	282	-867	2.24543
Srebf1	NM_001358314	837	635	-202	2.75866
Rai1	NM_009021	1149	272	-877	2.23673
Srebf1	NM_001358314	837	496	-341	2.59259
Rai1	NM_009021	1149	256	-893	2.2228
Srebf1	NM_001358314	837	415	-422	2.49582
Alkbh5	NM_172943	4096	199	-3897	2.04858
Alkbh5	NM_172943	4096	1040	-3056	2.25391
Alkbh5	NM_172943	4096	1736	-2360	2.42383
Alkbh5	NM_172943	4096	271	-3825	2.06616
Alkbh5	NM_172943	4096	3297	-799	2.80493
Alkbh5	NM_172943	4096	520	-3576	2.12695
Alkbh5	NM_172943	4096	75	-4021	2.01831
Alkbh5	NM_172943	4096	856	-3240	2.20898
Alkbh5	NM_172943	4096	2044	-2052	2.49902
Alkbh5	NM_172943	4096	3645	-451	2.88989
Alkbh5	NM_172943	4096	1630	-2466	2.39795
Alkbh5	NM_172943	4096	1842	-2254	2.44971
Alkbh5	NM_172943	4096	719	-3377	2.17554
Alkbh5	NM_172943	4096	2802	-1294	2.68408
Alkbh5	NM_172943	4096	1619	-2477	2.39526
Alkbh5	NM_172943	4096	750	-3346	2.18311
Alkbh5	NM_172943	4096	3622	-474	2.88428
Alkbh5	NM_172943	4096	3617	-479	2.88306
Alkbh5	NM_172943	4096	64	-4032	2.01562
Alkbh5	NM_172943	4096	1796	-2300	2.43848
Alkbh5	NM_172943	4096	2421	-1675	2.59106
Alkbh5	NM_172943	4096	171	-3925	2.04175
Alkbh5	NM_172943	4096	1579	-2517	2.3855
Alkbh5	NM_172943	4096	3695	-401	2.9021
Alkbh5	NM_172943	4096	1899	-2197	2.46362
Alkbh5	NM_172943	4096	2130	-1966	2.52002
Alkbh5	NM_172943	4096	396	-3700	2.09668
Alkbh5	NM_172943	4096	2068	-2028	2.50488
Alkbh5	NM_172943	4096	644	-3452	2.15723
Alkbh5	NM_172943	4096	2956	-1140	2.72168
Alkbh5	NM_172943	4096	1456	-2640	2.35547
Alkbh5	NM_172943	4096	854	-3242	2.2085
Alkbh5	NM_172943	4096	3056	-1040	2.74609
Alkbh5	NM_172943	4096	1177	-2919	2.28735
Alkbh5	NM_172943	4096	372	-3724	2.09082
Llgl1	NM_001159404	1142	955	-187	2.83625
Llgl1	NM_001159404	1142	486	-656	2.42557
Shmt1	NM_009171	246	147	-99	2.59756
Shmt1	NM_009171	246	82	-164	2.33333
Shmt1	NM_009171	246	62	-184	2.25203
Usp22	NM_001004143	2689	304	-2385	2.11305
Usp22	NM_001004143	2689	1352	-1337	2.50279
Usp22	NM_001004143	2689	1635	-1054	2.60803
Usp22	NM_001004143	2689	485	-2204	2.18036
Usp22	NM_001004143	2689	639	-2050	2.23763
Usp22	NM_001004143	2689	1705	-984	2.63406
Usp22	NM_001004143	2689	2402	-287	2.89327
Usp22	NM_001004143	2689	2335	-354	2.86835
Usp22	NM_001004143	2689	2234	-455	2.83079
Usp22	NM_001004143	2689	589	-2100	2.21904
Usp22	NM_001004143	2689	1308	-1381	2.48643
Usp22	NM_001004143	2689	2577	-112	2.95835
Usp22	NM_001004143	2689	2361	-328	2.87802
Aldh3a2	NM_007437	1557	431	-1126	2.27681
Aldh3a2	NM_007437	1557	200	-1357	2.12845
Epn2	NM_001362587	3534	2961	-573	2.83786
Epn2	NM_001362587	3534	57	-3477	2.01613
Epn2	NM_001362587	3534	3466	-68	2.98076
Epn2	NM_001362587	3534	3019	-515	2.85427
Epn2	NM_001362587	3534	1532	-2002	2.4335
Epn2	NM_001362587	3534	1777	-1757	2.50283
Epn2	NM_001362587	3534	1224	-2310	2.34635
Epn2	NM_001362587	3534	1649	-1885	2.46661
Epn2	NM_001362587	3534	829	-2705	2.23458
Ttc19	NM_028360	2280	491	-1789	2.21535
Ttc19	NM_028360	2280	1182	-1098	2.51842
Ttc19	NM_028360	2280	955	-1325	2.41886
Ubb	NM_011664	149	78	-71	2.52349
Mmgt2	NM_175002	1159	597	-562	2.5151
Zfp287	NM_133208	2313	3	-2310	2.0013
Arhgap44	NM_175003	1455	356	-1099	2.24467
Elac2	NM_001362983	845	538	-307	2.63669
Arhgap44	NM_175003	1455	746	-709	2.51271
Ndel1	NM_023668	1125	292	-833	2.25956
Ndel1	NM_023668	1125	915	-210	2.81333
Pfas	NM_001159519	2261	1554	-707	2.68731
Pfas	NM_001159519	2261	366	-1895	2.16188
Per1	NM_011065	597	280	-317	2.46901
Per1	NM_011065	597	33	-564	2.05528
Kcnab3	NM_010599	897	593	-304	2.66109
Eif4a1	NM_144958	536	268	-268	2.5
Eif4a1	NM_144958	536	482	-54	2.89925
Eif4a1	NM_144958	536	223	-313	2.41604
Eif4a1	NM_144958	536	505	-31	2.94216
Eif5a	NM_001166595	640	335	-305	2.52344
Eif5a	NM_001166595	640	198	-442	2.30938
Eif5a	NM_001166595	640	451	-189	2.70469
Phf23	NM_001291125	558	443	-115	2.79391
Dvl2	NM_007888	516	6	-510	2.01163
Dvl2	NM_007888	516	117	-399	2.22674
Dvl2	NM_007888	516	327	-189	2.63372
Bcl6b	NM_007528	1899	1169	-730	2.61559
Bcl6b	NM_007528	1899	294	-1605	2.15482
Bcl6b	NM_007528	1899	677	-1222	2.3565
Bcl6b	NM_007528	1899	1806	-93	2.95103
Rnf167	NM_027445	199	60	-139	2.30151
Pfn1	NM_011072	276	100	-176	2.36232
Pfn1	NM_011072	276	196	-80	2.71014
Kif1c	NM_153103	3090	194	-2896	2.06278
Kif1c	NM_153103	3090	466	-2624	2.15081
Rabep1	NM_001291143	2621	1117	-1504	2.42617
Nup88	NM_172394	200	97	-103	2.485
Nup88	NM_172394	200	1	-199	2.005
Med31	NM_026068	160	6	-154	2.0375
Ube2g1	NM_025985	2994	2141	-853	2.7151
Ube2g1	NM_025985	2994	2495	-499	2.83333
Ankfy1	NM_009671	4500	3795	-705	2.84333
Emc6	NM_001168470	867	723	-144	2.83391
Ctns	NM_001357891	1321	107	-1214	2.081
Ctns	NM_001357891	1321	1177	-144	2.89099
Tsr1	NM_177325	933	885	-48	2.94855
Smg6	NM_001002764	1497	704	-793	2.47027
Rpa1	NM_026653	1045	190	-855	2.18182
Rpa1	NM_026653	1045	435	-610	2.41627
Rpa1	NM_026653	1045	249	-796	2.23828
Rpa1	NM_026653	1045	454	-591	2.43445
Rpa1	NM_026653	1045	467	-578	2.44689
Crk	NM_133656	4924	1614	-3310	2.32778
Ywhae	NM_009536	1168	653	-515	2.55908
Ywhae	NM_009536	1168	584	-584	2.5
Ywhae	NM_009536	1168	506	-662	2.43322
Ywhae	NM_009536	1168	901	-267	2.7714
Ywhae	NM_009536	1168	454	-714	2.3887
Ywhae	NM_009536	1168	794	-374	2.67979
Ywhae	NM_009536	1168	669	-499	2.57277
Ywhae	NM_009536	1168	1026	-142	2.87842
Ywhae	NM_009536	1168	229	-939	2.19606
Ywhae	NM_009536	1168	892	-276	2.7637
Ywhae	NM_009536	1168	710	-458	2.60788
Ywhae	NM_009536	1168	600	-568	2.5137
Ywhae	NM_009536	1168	873	-295	2.74743
Ywhae	NM_009536	1168	335	-833	2.28682
Ywhae	NM_009536	1168	155	-1013	2.13271
Ywhae	NM_009536	1168	551	-617	2.47175
Ywhae	NM_009536	1168	369	-799	2.31592
Ywhae	NM_009536	1168	253	-915	2.21661
Ywhae	NM_009536	1168	47	-1121	2.04024
Ywhae	NM_009536	1168	1077	-91	2.92209
Ywhae	NM_009536	1168	469	-699	2.40154
Ywhae	NM_009536	1168	141	-1027	2.12072
Ywhae	NM_009536	1168	961	-207	2.82277
Ywhae	NM_009536	1168	1048	-120	2.89726
Ywhae	NM_009536	1168	209	-959	2.17894
Ywhae	NM_009536	1168	219	-949	2.1875
Ywhae	NM_009536	1168	998	-170	2.85445
Ywhae	NM_009536	1168	1090	-78	2.93322
Ywhae	NM_009536	1168	878	-290	2.75171
Ywhae	NM_009536	1168	700	-468	2.59932
Ywhae	NM_009536	1168	655	-513	2.56079
Nsrp1	NM_001012309	1447	353	-1094	2.24395
Nsrp1	NM_001012309	1447	648	-799	2.44782
Nsrp1	NM_001012309	1447	987	-460	2.6821
Ssh2	NM_001291190	4738	2934	-1804	2.61925
Ssh2	NM_001291190	4738	3539	-1199	2.74694
Ssh2	NM_001291190	4738	2350	-2388	2.49599
Ssh2	NM_001291190	4738	370	-4368	2.07809
Ssh2	NM_001291190	4738	2119	-2619	2.44724
Ssh2	NM_001291190	4738	2117	-2621	2.44681
Ssh2	NM_001291190	4738	1612	-3126	2.34023
Ssh2	NM_001291190	4738	3290	-1448	2.69439
Taok1	NM_144825	8704	1869	-6835	2.21473
Nufip2	NM_001024205	8230	7988	-242	2.9706
Nufip2	NM_001024205	8230	4681	-3549	2.56877
Nufip2	NM_001024205	8230	100	-8130	2.01215
Nufip2	NM_001024205	8230	1792	-6438	2.21774
Nufip2	NM_001024205	8230	4761	-3469	2.57849
Nufip2	NM_001024205	8230	4425	-3805	2.53767
Nufip2	NM_001024205	8230	5820	-2410	2.70717
Nufip2	NM_001024205	8230	2681	-5549	2.32576
Nufip2	NM_001024205	8230	2016	-6214	2.24496
Nufip2	NM_001024205	8230	1800	-6430	2.21871
Nufip2	NM_001024205	8230	4234	-3996	2.51446
Nufip2	NM_001024205	8230	4355	-3875	2.52916
Nufip2	NM_001024205	8230	3963	-4267	2.48153
Nufip2	NM_001024205	8230	6375	-1855	2.77461
Nufip2	NM_001024205	8230	5781	-2449	2.70243
Nufip2	NM_001024205	8230	400	-7830	2.0486
Nufip2	NM_001024205	8230	1286	-6944	2.15626
Nufip2	NM_001024205	8230	2575	-5655	2.31288
Nufip2	NM_001024205	8230	6769	-1461	2.82248
Nufip2	NM_001024205	8230	2851	-5379	2.34642
Nufip2	NM_001024205	8230	5485	-2745	2.66646
Nufip2	NM_001024205	8230	2896	-5334	2.35188
Nufip2	NM_001024205	8230	7696	-534	2.93512
Nufip2	NM_001024205	8230	8212	-18	2.99781
Nufip2	NM_001024205	8230	498	-7732	2.06051
Nufip2	NM_001024205	8230	5390	-2840	2.65492
Fam222b	NM_001364110	2035	1158	-877	2.56904
Fam222b	NM_001364110	2035	483	-1552	2.23735
Fam222b	NM_001364110	2035	669	-1366	2.32875
Fam222b	NM_001364110	2035	530	-1505	2.26044
Fam222b	NM_001364110	2035	102	-1933	2.05012
Fam222b	NM_001364110	2035	251	-1784	2.12334
Fam222b	NM_001364110	2035	1211	-824	2.59509
Fam222b	NM_001364110	2035	1279	-756	2.6285
Fam222b	NM_001364110	2035	1854	-181	2.91106
Unc119	NM_001313988	520	434	-86	2.83462
Tmem199	NM_199199	654	242	-412	2.37003
Tmem199	NM_199199	654	387	-267	2.59174
Tmem199	NM_199199	654	239	-415	2.36544
Tmem199	NM_199199	654	246	-408	2.37615
Tnfaip1	NM_001159392	2454	523	-1931	2.21312
Wsb1	NM_019653	920	596	-324	2.64783
Rab11fip4	NM_175543	1172	657	-515	2.56058
Suz12	NM_199196	1932	1689	-243	2.87422
Suz12	NM_199196	1932	557	-1375	2.2883
Suz12	NM_199196	1932	260	-1672	2.13458
Suz12	NM_199196	1932	1137	-795	2.58851
Suz12	NM_199196	1932	1745	-187	2.90321
Suz12	NM_199196	1932	1728	-204	2.89441
Suz12	NM_199196	1932	1472	-460	2.7619
Suz12	NM_199196	1932	661	-1271	2.34213
Suz12	NM_199196	1932	303	-1629	2.15683
Suz12	NM_199196	1932	865	-1067	2.44772
Suz12	NM_199196	1932	1079	-853	2.55849
Suz12	NM_199196	1932	46	-1886	2.02381
Suz12	NM_199196	1932	1001	-931	2.51812
Suz12	NM_199196	1932	1530	-402	2.79193
Suz12	NM_199196	1932	545	-1387	2.28209
Suz12	NM_199196	1932	605	-1327	2.31315
Suz12	NM_199196	1932	547	-1385	2.28313
Suz12	NM_199196	1932	221	-1711	2.11439
Suz12	NM_199196	1932	1457	-475	2.75414
Suz12	NM_199196	1932	242	-1690	2.12526
Suz12	NM_199196	1932	1442	-490	2.74638
Suz12	NM_199196	1932	1538	-394	2.79607
Suz12	NM_199196	1932	545	-1387	2.28209
Suz12	NM_199196	1932	1512	-420	2.78261
Suz12	NM_199196	1932	482	-1450	2.24948
Suz12	NM_199196	1932	1242	-690	2.64286
Suz12	NM_199196	1932	1203	-729	2.62267
Crlf3	NM_018776	987	113	-874	2.11449
Crlf3	NM_018776	987	455	-532	2.46099
Crlf3	NM_018776	987	186	-801	2.18845
Crlf3	NM_018776	987	442	-545	2.44782
Crlf3	NM_018776	987	58	-929	2.05876
Crlf3	NM_018776	987	128	-859	2.12969
Zfp207	NM_001130171	697	576	-121	2.8264
Zfp207	NM_001130171	697	480	-217	2.68867
Zfp207	NM_001130171	697	245	-452	2.35151
Zfp207	NM_001130171	697	659	-38	2.94548
Lig3	NM_001291245	2759	778	-1981	2.28199
Rffl	NM_001007465	2188	1280	-908	2.58501
Lig3	NM_001291245	2759	2171	-588	2.78688
Rffl	NM_001007465	2188	697	-1491	2.31856
Lig3	NM_001291245	2759	183	-2576	2.06633
Rffl	NM_001007465	2188	1543	-645	2.70521
Lig3	NM_001291245	2759	1808	-951	2.65531
Rffl	NM_001007465	2188	1061	-1127	2.48492
Heatr6	NM_145432	2031	1922	-109	2.94633
Dusp14	NM_019819	571	3	-568	2.00525
Dusp14	NM_019819	571	85	-486	2.14886
Dusp14	NM_019819	571	114	-457	2.19965
Ggnbp2	NM_001364115	648	10	-638	2.01543
Pigw	NM_001077636	676	12	-664	2.01775
Usp32	NM_001029934	1921	1508	-413	2.78501
Appbp2	NM_025825	335	177	-158	2.52836
Appbp2	NM_025825	335	26	-309	2.07761
Rnft1	NM_029788	3051	2217	-834	2.72665
Rnft1	NM_029788	3051	2763	-288	2.9056
Vmp1	NM_029478	1045	1010	-35	2.96651
Vmp1	NM_029478	1045	885	-160	2.84689
Vmp1	NM_029478	1045	169	-876	2.16172
Vmp1	NM_029478	1045	905	-140	2.86603
Vmp1	NM_029478	1045	552	-493	2.52823
Cltc	NM_001003908	1211	597	-614	2.49298
Cltc	NM_001003908	1211	69	-1142	2.05698
Cltc	NM_001003908	1211	559	-652	2.4616
Cltc	NM_001003908	1211	838	-373	2.69199
Cltc	NM_001003908	1211	635	-576	2.52436
Cltc	NM_001003908	1211	675	-536	2.55739
Gdpd1	NM_025638	1378	278	-1100	2.20174
Smg8	NM_024262	220	145	-75	2.65909
Tex14	NM_001199293	302	299	-3	2.99007
Hsf5	NM_001045527	2174	1776	-398	2.81693
Dynll2	NM_026556	1907	1855	-52	2.97273
Dynll2	NM_026556	1907	946	-961	2.49607
Dynll2	NM_026556	1907	1756	-151	2.92082
Dynll2	NM_026556	1907	1429	-478	2.74934
Dynll2	NM_026556	1907	1282	-625	2.67226
Dynll2	NM_026556	1907	776	-1131	2.40692
Dynll2	NM_026556	1907	189	-1718	2.09911
Dynll2	NM_026556	1907	304	-1603	2.15941
Dynll2	NM_026556	1907	675	-1232	2.35396
Srsf1	NM_173374	4150	3331	-819	2.80265
Srsf1	NM_173374	4150	1291	-2859	2.31108
Srsf1	NM_173374	4150	1964	-2186	2.47325
Srsf1	NM_173374	4150	925	-3225	2.22289
Srsf1	NM_173374	4150	3784	-366	2.91181
Srsf1	NM_173374	4150	1714	-2436	2.41301
Srsf1	NM_173374	4150	1629	-2521	2.39253
Srsf1	NM_173374	4150	2988	-1162	2.72
Srsf1	NM_173374	4150	3730	-420	2.8988
Srsf1	NM_173374	4150	3267	-883	2.78723
Srsf1	NM_173374	4150	2308	-1842	2.55614
Srsf1	NM_173374	4150	4050	-100	2.9759
Srsf1	NM_173374	4150	373	-3777	2.08988
Srsf1	NM_173374	4150	493	-3657	2.1188
Srsf1	NM_173374	4150	3324	-826	2.80096
Srsf1	NM_173374	4150	2903	-1247	2.69952
Srsf1	NM_173374	4150	1169	-2981	2.28169
Srsf1	NM_173374	4150	3654	-496	2.88048
Srsf1	NM_173374	4150	2261	-1889	2.54482
Srsf1	NM_173374	4150	4055	-95	2.97711
Srsf1	NM_173374	4150	2194	-1956	2.52867
Srsf1	NM_173374	4150	2237	-1913	2.53904
Srsf1	NM_173374	4150	3491	-659	2.8412
Srsf1	NM_173374	4150	3667	-483	2.88361
Srsf1	NM_173374	4150	1999	-2151	2.48169
Srsf1	NM_173374	4150	339	-3811	2.08169
Srsf1	NM_173374	4150	3671	-479	2.88458
Srsf1	NM_173374	4150	2221	-1929	2.53518
Srsf1	NM_173374	4150	275	-3875	2.06627
Srsf1	NM_173374	4150	2781	-1369	2.67012
Srsf1	NM_173374	4150	344	-3806	2.08289
Srsf1	NM_173374	4150	3386	-764	2.8159
Srsf1	NM_173374	4150	733	-3417	2.17663
Srsf1	NM_173374	4150	776	-3374	2.18699
Srsf1	NM_173374	4150	1145	-3005	2.2759
Srsf1	NM_173374	4150	3788	-362	2.91277
Srsf1	NM_173374	4150	4089	-61	2.9853
Srsf1	NM_173374	4150	42	-4108	2.01012
Srsf1	NM_173374	4150	3043	-1107	2.73325
Srsf1	NM_173374	4150	3251	-899	2.78337
Srsf1	NM_173374	4150	167	-3983	2.04024
Srsf1	NM_173374	4150	3973	-177	2.95735
Srsf1	NM_173374	4150	1370	-2780	2.33012
Srsf1	NM_173374	4150	3169	-981	2.76361
Srsf1	NM_173374	4150	3325	-825	2.8012
Srsf1	NM_173374	4150	571	-3579	2.13759
Srsf1	NM_173374	4150	1382	-2768	2.33301
Srsf1	NM_173374	4150	1037	-3113	2.24988
Srsf1	NM_173374	4150	2420	-1730	2.58313
Srsf1	NM_173374	4150	752	-3398	2.1812
Srsf1	NM_173374	4150	528	-3622	2.12723
Srsf1	NM_173374	4150	2160	-1990	2.52048
Srsf1	NM_173374	4150	1012	-3138	2.24386
Srsf1	NM_173374	4150	43	-4107	2.01036
Srsf1	NM_173374	4150	562	-3588	2.13542
Srsf1	NM_173374	4150	2504	-1646	2.60337
Srsf1	NM_173374	4150	1919	-2231	2.46241
Srsf1	NM_173374	4150	2472	-1678	2.59566
Srsf1	NM_173374	4150	1289	-2861	2.3106
Srsf1	NM_173374	4150	513	-3637	2.12361
Srsf1	NM_173374	4150	1765	-2385	2.4253
Vezf1	NM_016686	2903	1383	-1520	2.4764
Vezf1	NM_016686	2903	2117	-786	2.72925
Mrps23	NM_001291272	743	395	-348	2.53163
Msi2	NM_001363195	5309	3029	-2280	2.57054
Msi2	NM_001363195	5309	1630	-3679	2.30703
Msi2	NM_001363195	5309	710	-4599	2.13374
Msi2	NM_001363195	5309	3328	-1981	2.62686
Msi2	NM_001363195	5309	4376	-933	2.82426
Msi2	NM_001363195	5309	2367	-2942	2.44585
Msi2	NM_001363195	5309	3859	-1450	2.72688
Msi2	NM_001363195	5309	5186	-123	2.97683
Msi2	NM_001363195	5309	5296	-13	2.99755
Msi2	NM_001363195	5309	296	-5013	2.05575
Msi2	NM_001363195	5309	2430	-2879	2.45771
Msi2	NM_001363195	5309	3947	-1362	2.74345
Msi2	NM_001363195	5309	2219	-3090	2.41797
Msi2	NM_001363195	5309	820	-4489	2.15445
Msi2	NM_001363195	5309	4218	-1091	2.7945
Msi2	NM_001363195	5309	748	-4561	2.14089
Msi2	NM_001363195	5309	3425	-1884	2.64513
Msi2	NM_001363195	5309	165	-5144	2.03108
Msi2	NM_001363195	5309	2368	-2941	2.44604
Msi2	NM_001363195	5309	4162	-1147	2.78395
Msi2	NM_001363195	5309	1574	-3735	2.29648
Msi2	NM_001363195	5309	5122	-187	2.96478
Msi2	NM_001363195	5309	4122	-1187	2.77642
Msi2	NM_001363195	5309	1773	-3536	2.33396
Msi2	NM_001363195	5309	1303	-4006	2.24543
Msi2	NM_001363195	5309	1050	-4259	2.19778
Msi2	NM_001363195	5309	182	-5127	2.03428
Msi2	NM_001363195	5309	3844	-1465	2.72405
Msi2	NM_001363195	5309	4195	-1114	2.79017
Msi2	NM_001363195	5309	4474	-835	2.84272
Msi2	NM_001363195	5309	747	-4562	2.1407
Msi2	NM_001363195	5309	207	-5102	2.03899
Msi2	NM_001363195	5309	225	-5084	2.04238
Trim25	NM_009546	3571	2671	-900	2.74797
Dgke	NM_019505	5552	355	-5197	2.06394
Cox11	NM_199008	1424	1064	-360	2.74719
Mbtd1	NM_001346525	3301	3279	-22	2.99334
Mbtd1	NM_001346525	3301	1436	-1865	2.43502
Nme1	NM_008704	470	184	-286	2.39149
Luc7l3	NM_001361575	538	467	-71	2.86803
Kat7	NM_001195003	3932	1827	-2105	2.46465
Kat7	NM_001195003	3932	3280	-652	2.83418
Fam117a	NM_172543	912	214	-698	2.23465
Fam117a	NM_172543	912	257	-655	2.2818
Fam117a	NM_172543	912	598	-314	2.6557
Fam117a	NM_172543	912	108	-804	2.11842
Fam117a	NM_172543	912	216	-696	2.23684
Fam117a	NM_172543	912	373	-539	2.40899
Fam117a	NM_172543	912	410	-502	2.44956
Ube2z	NM_172300	2812	206	-2606	2.07326
Ube2z	NM_172300	2812	2062	-750	2.73329
Ube2z	NM_172300	2812	2302	-510	2.81863
Ube2z	NM_172300	2812	2333	-479	2.82966
Ube2z	NM_172300	2812	2014	-798	2.71622
Snx11	NM_028965	1496	408	-1088	2.27273
Nfe2l1	NM_008686	1761	778	-983	2.44179
Nfe2l1	NM_008686	1761	688	-1073	2.39069
Nfe2l1	NM_008686	1761	1719	-42	2.97615
Nfe2l1	NM_008686	1761	661	-1100	2.37535
Nfe2l1	NM_008686	1761	102	-1659	2.05792
Nfe2l1	NM_008686	1761	1253	-508	2.71153
Nfe2l1	NM_008686	1761	294	-1467	2.16695
Nfe2l1	NM_008686	1761	1119	-642	2.63543
Nfe2l1	NM_008686	1761	772	-989	2.43839
Nfe2l1	NM_008686	1761	519	-1242	2.29472
Nfe2l1	NM_008686	1761	262	-1499	2.14878
Kpnb1	NM_008379	2970	1062	-1908	2.35758
Kpnb1	NM_008379	2970	2166	-804	2.72929
Kpnb1	NM_008379	2970	2389	-581	2.80438
Kpnb1	NM_008379	2970	798	-2172	2.26869
Kpnb1	NM_008379	2970	350	-2620	2.11785
Kpnb1	NM_008379	2970	893	-2077	2.30067
Kpnb1	NM_008379	2970	2069	-901	2.69663
Kpnb1	NM_008379	2970	2662	-308	2.8963
Mllt6	NM_139311	3870	3689	-181	2.95323
Mllt6	NM_139311	3870	1890	-1980	2.48837
Mllt6	NM_139311	3870	5	-3865	2.00129
Pip4k2b	NM_054051	3701	616	-3085	2.16644
Pip4k2b	NM_054051	3701	1505	-2196	2.40665
Pip4k2b	NM_054051	3701	132	-3569	2.03567
Pip4k2b	NM_054051	3701	1216	-2485	2.32856
Pip4k2b	NM_054051	3701	191	-3510	2.05161
Pip4k2b	NM_054051	3701	1984	-1717	2.53607
Pip4k2b	NM_054051	3701	215	-3486	2.05809
Pip4k2b	NM_054051	3701	1249	-2452	2.33748
Pip4k2b	NM_054051	3701	1611	-2090	2.43529
Pip4k2b	NM_054051	3701	2424	-1277	2.65496
Pip4k2b	NM_054051	3701	2331	-1370	2.62983
Pip4k2b	NM_054051	3701	696	-3005	2.18806
Cwc25	NM_026186	1884	1159	-725	2.61518
Fbxl20	NM_028149	7036	1317	-5719	2.18718
Erbb2	NM_001003817	1047	684	-363	2.6533
Ormdl3	NM_025661	1417	1165	-252	2.82216
Med24	NM_001361995	308	86	-222	2.27922
Med24	NM_001361995	308	60	-248	2.19481
Nr1d1	NM_145434	287	257	-30	2.89547
Casc3	NM_138660	1588	565	-1023	2.35579
Casc3	NM_138660	1588	1322	-266	2.83249
Casc3	NM_138660	1588	220	-1368	2.13854
Casc3	NM_138660	1588	657	-931	2.41373
Casc3	NM_138660	1588	1101	-487	2.69332
Eif1	NM_011508	737	500	-237	2.67843
[truncated: 9,673 more rows]

## Sheet: 3' UTR UGUU(UorA) positions
refseqID	utr3_size	UGUU.UorA_utr3_st	UGUU.UorA_utr3_stop	UGUU.UorA_rel_location
NM_008866	1719	99	-1620	2.05759
NM_008866	1719	107	-1612	2.06225
NM_008866	1719	145	-1574	2.08435
NM_008866	1719	433	-1286	2.25189
NM_008866	1719	1125	-594	2.65445
NM_008866	1719	1172	-547	2.68179
NM_008866	1719	1367	-352	2.79523
NM_008866	1719	1431	-288	2.83246
NM_008866	1719	1671	-48	2.97208
NM_133826	384	152	-232	2.39583
NM_133826	384	160	-224	2.41667
NM_133826	384	208	-176	2.54167
NM_021511	834	505	-329	2.60552
NM_021511	834	622	-212	2.7458
NM_021511	834	642	-192	2.76978
NM_021511	834	758	-76	2.90887
NM_021511	834	777	-57	2.93165
NM_021511	834	787	-47	2.94365
NM_133220	3678	205	-3473	2.05574
NM_133220	3678	289	-3389	2.07858
NM_133220	3678	303	-3375	2.08238
NM_133220	3678	347	-3331	2.09434
NM_133220	3678	715	-2963	2.1944
NM_133220	3678	771	-2907	2.20962
NM_133220	3678	888	-2790	2.24144
NM_133220	3678	925	-2753	2.2515
NM_133220	3678	1218	-2460	2.33116
NM_133220	3678	1351	-2327	2.36732
NM_133220	3678	1493	-2185	2.40593
NM_133220	3678	1679	-1999	2.4565
NM_133220	3678	1736	-1942	2.472
NM_133220	3678	1923	-1755	2.52284
NM_133220	3678	2001	-1677	2.54405
NM_133220	3678	2123	-1555	2.57722
NM_133220	3678	2223	-1455	2.6044
NM_133220	3678	2525	-1153	2.68651
NM_133220	3678	2798	-880	2.76074
NM_133220	3678	2802	-876	2.76183
NM_133220	3678	3605	-73	2.98015
NM_172294	1530	822	-708	2.53725
NM_172294	1530	1009	-521	2.65948
NM_172294	1530	1022	-508	2.66797
NM_172294	1530	1191	-339	2.77843
NM_172294	1530	1284	-246	2.83922
NM_172294	1530	1389	-141	2.90784
NM_009352	970	68	-902	2.0701
NM_009352	970	150	-820	2.15464
NM_009352	970	165	-805	2.1701
NM_009352	970	169	-801	2.17423
NM_009352	970	173	-797	2.17835
NM_009352	970	177	-793	2.18247
NM_009352	970	181	-789	2.1866
NM_009352	970	185	-785	2.19072
NM_009352	970	302	-668	2.31134
NM_133832	1133	5	-1128	2.00441
NM_133832	1133	244	-889	2.21536
NM_133832	1133	299	-834	2.2639
NM_133832	1133	571	-562	2.50397
NM_133832	1133	667	-466	2.5887
NM_133832	1133	1014	-119	2.89497
NM_133832	1133	1055	-78	2.93116
NM_133832	1133	1065	-68	2.93998
NM_133832	1133	1097	-36	2.96823
NM_026392	850	66	-784	2.07765
NM_026392	850	72	-778	2.08471
NM_026392	850	148	-702	2.17412
NM_026392	850	381	-469	2.44824
NM_026392	850	460	-390	2.54118
NM_026392	850	784	-66	2.92235
NM_026392	850	788	-62	2.92706
NM_026392	850	806	-44	2.94824
NM_026392	850	810	-40	2.95294
NM_026392	850	815	-35	2.95882
NM_172124	2671	161	-2510	2.06028
NM_172124	2671	453	-2218	2.1696
NM_172124	2671	558	-2113	2.20891
NM_172124	2671	727	-1944	2.27218
NM_172124	2671	899	-1772	2.33658
NM_172124	2671	1553	-1118	2.58143
NM_172124	2671	1796	-875	2.67241
NM_172124	2671	1809	-862	2.67727
NM_172124	2671	2310	-361	2.86484
NM_172124	2671	2457	-214	2.91988
NM_026719	3565	143	-3422	2.04011
NM_026719	3565	235	-3330	2.06592
NM_026719	3565	267	-3298	2.07489
NM_026719	3565	508	-3057	2.1425
NM_026719	3565	610	-2955	2.17111
NM_026719	3565	1191	-2374	2.33408
NM_026719	3565	1195	-2370	2.3352
NM_026719	3565	1362	-2203	2.38205
NM_026719	3565	1512	-2053	2.42412
NM_026719	3565	1793	-1772	2.50295
NM_026719	3565	2000	-1565	2.56101
NM_026719	3565	2200	-1365	2.61711
NM_026719	3565	2519	-1046	2.70659
NM_026719	3565	2558	-1007	2.71753
NM_026719	3565	2610	-955	2.73212
NM_026719	3565	3021	-544	2.84741
NM_026719	3565	3397	-168	2.95288
NM_026719	3565	3429	-136	2.96185
NM_178601	1277	531	-746	2.41582
NM_178601	1277	535	-742	2.41895
NM_178601	1277	637	-640	2.49883
NM_001357425	2507	31	-2476	2.01237
NM_001357425	2507	72	-2435	2.02872
NM_001357425	2507	432	-2075	2.17232
NM_001357425	2507	626	-1881	2.2497
NM_001357425	2507	637	-1870	2.25409
NM_001357425	2507	742	-1765	2.29597
NM_001357425	2507	746	-1761	2.29757
NM_001357425	2507	847	-1660	2.33785
NM_001357425	2507	1012	-1495	2.40367
NM_001357425	2507	1193	-1314	2.47587
NM_001357425	2507	1310	-1197	2.52254
NM_001357425	2507	1534	-973	2.61189
NM_001357425	2507	1716	-791	2.68448
NM_001357425	2507	2433	-74	2.97048
NM_001357425	2507	2487	-20	2.99202
NM_001357425	2507	2503	-4	2.9984
NM_030266	2481	25	-2456	2.01008
NM_030266	2481	104	-2377	2.04192
NM_030266	2481	444	-2037	2.17896
NM_030266	2481	621	-1860	2.2503
NM_030266	2481	898	-1583	2.36195
NM_030266	2481	961	-1520	2.38734
NM_030266	2481	1129	-1352	2.45506
NM_030266	2481	1158	-1323	2.46675
NM_030266	2481	1166	-1315	2.46997
NM_030266	2481	1278	-1203	2.51511
NM_030266	2481	1283	-1198	2.51713
NM_030266	2481	1291	-1190	2.52035
NM_030266	2481	1300	-1181	2.52398
NM_030266	2481	1306	-1175	2.5264
NM_030266	2481	1311	-1170	2.52842
NM_030266	2481	1324	-1157	2.53366
NM_030266	2481	1331	-1150	2.53648
NM_030266	2481	1728	-753	2.69649
NM_030266	2481	1735	-746	2.69931
NM_030266	2481	1739	-742	2.70093
NM_030266	2481	1805	-676	2.72753
NM_030266	2481	1930	-551	2.77791
NM_030266	2481	1998	-483	2.80532
NM_030266	2481	2281	-200	2.91939
NM_030266	2481	2346	-135	2.94559
NM_030266	2481	2385	-96	2.96131
NM_198303	3866	101	-3765	2.02613
NM_198303	3866	211	-3655	2.05458
NM_198303	3866	640	-3226	2.16555
NM_198303	3866	819	-3047	2.21185
NM_198303	3866	1662	-2204	2.4299
NM_198303	3866	2060	-1806	2.53285
NM_198303	3866	2795	-1071	2.72297
NM_198303	3866	2810	-1056	2.72685
NM_198303	3866	3203	-663	2.8285
NM_028043	1611	140	-1471	2.0869
NM_028043	1611	180	-1431	2.11173
NM_028043	1611	290	-1321	2.18001
NM_028043	1611	614	-997	2.38113
NM_028043	1611	1119	-492	2.6946
NM_001252201	1598	683	-915	2.42741
NM_001252201	1598	881	-717	2.55131
NM_001252201	1598	952	-646	2.59574
NM_001252201	1598	962	-636	2.602
NM_001252201	1598	967	-631	2.60513
NM_001252201	1598	986	-612	2.61702
NM_001252201	1598	1041	-557	2.65144
NM_001252201	1598	1409	-189	2.88173
NM_001252201	1598	1463	-135	2.91552
NM_023514	187	143	-44	2.76471
NM_133818	2704	573	-2131	2.21191
NM_133818	2704	889	-1815	2.32877
NM_133818	2704	933	-1771	2.34504
NM_133818	2704	1051	-1653	2.38868
NM_133818	2704	1251	-1453	2.46265
NM_133818	2704	1784	-920	2.65976
NM_133818	2704	2162	-542	2.79956
NM_133818	2704	2375	-329	2.87833
NM_133818	2704	2565	-139	2.94859
NM_010879	1176	262	-914	2.22279
NM_010879	1176	413	-763	2.35119
NM_010879	1176	770	-406	2.65476
NM_010879	1176	1007	-169	2.85629
NM_001039710	899	94	-805	2.10456
NM_001039710	899	347	-552	2.38598
NM_001039710	899	366	-533	2.40712
NM_001039710	899	403	-496	2.44828
NM_001039710	899	558	-341	2.62069
NM_001039710	899	600	-299	2.66741
NM_001039710	899	607	-292	2.67519
NM_001039710	899	614	-285	2.68298
NM_001039710	899	881	-18	2.97998
NM_008303	197	153	-44	2.77665
NM_025283	2093	104	-1989	2.04969
NM_025283	2093	242	-1851	2.11562
NM_025283	2093	328	-1765	2.15671
NM_025283	2093	375	-1718	2.17917
NM_025283	2093	439	-1654	2.20975
NM_025283	2093	467	-1626	2.22312
NM_025283	2093	539	-1554	2.25753
NM_025283	2093	607	-1486	2.29001
NM_025283	2093	687	-1406	2.32824
NM_025283	2093	815	-1278	2.38939
NM_025283	2093	1537	-556	2.73435
NM_025283	2093	1541	-552	2.73626
NM_025283	2093	1723	-370	2.82322
NM_025283	2093	1758	-335	2.83994
NM_025283	2093	1920	-173	2.91734
NM_025283	2093	2003	-90	2.957
NM_025283	2093	2063	-30	2.98567
NM_028546	1858	44	-1814	2.02368
NM_028546	1858	148	-1710	2.07966
NM_028546	1858	157	-1701	2.0845
NM_028546	1858	219	-1639	2.11787
NM_028546	1858	260	-1598	2.13994
NM_028546	1858	472	-1386	2.25404
NM_028546	1858	477	-1381	2.25673
NM_028546	1858	482	-1376	2.25942
NM_028546	1858	605	-1253	2.32562
NM_028546	1858	1068	-790	2.57481
NM_028546	1858	1161	-697	2.62487
NM_028546	1858	1378	-480	2.74166
NM_028546	1858	1542	-316	2.82992
NM_028546	1858	1549	-309	2.83369
NM_028546	1858	1605	-253	2.86383
NM_028546	1858	1667	-191	2.8972
NM_028546	1858	1701	-157	2.9155
NM_028546	1858	1806	-52	2.97201
NM_025824	2288	141	-2147	2.06163
NM_025824	2288	375	-1913	2.1639
NM_025824	2288	391	-1897	2.17089
NM_025824	2288	566	-1722	2.24738
NM_025824	2288	758	-1530	2.33129
NM_025824	2288	826	-1462	2.36101
NM_025824	2288	1689	-599	2.7382
NM_025824	2288	1814	-474	2.79283
NM_025824	2288	1946	-342	2.85052
NM_025824	2288	2047	-241	2.89467
NM_025824	2288	2057	-231	2.89904
NM_022988	951	206	-745	2.21661
NM_022988	951	211	-740	2.22187
NM_022988	951	245	-706	2.25762
NM_022988	951	552	-399	2.58044
NM_022988	951	567	-384	2.59621
NM_022988	951	689	-262	2.7245
NM_001037725	3621	279	-3342	2.07705
NM_001037725	3621	295	-3326	2.08147
NM_001037725	3621	467	-3154	2.12897
NM_001037725	3621	474	-3147	2.1309
NM_001037725	3621	507	-3114	2.14002
NM_001037725	3621	661	-2960	2.18255
NM_001037725	3621	713	-2908	2.19691
NM_001037725	3621	817	-2804	2.22563
NM_001037725	3621	1331	-2290	2.36758
NM_001037725	3621	1482	-2139	2.40928
NM_001037725	3621	1733	-1888	2.4786
NM_001037725	3621	1891	-1730	2.52223
NM_001037725	3621	1896	-1725	2.52361
NM_001037725	3621	1900	-1721	2.52472
NM_001037725	3621	2041	-1580	2.56366
NM_001037725	3621	2132	-1489	2.58879
NM_001037725	3621	2141	-1480	2.59127
NM_001037725	3621	2434	-1187	2.67219
NM_001037725	3621	2837	-784	2.78349
NM_001037725	3621	2867	-754	2.79177
NM_001037725	3621	2951	-670	2.81497
NM_001037725	3621	2960	-661	2.81745
NM_001037725	3621	3073	-548	2.84866
NM_001037725	3621	3384	-237	2.93455
NM_001037725	3621	3418	-203	2.94394
NM_009952	7170	23	-7147	2.00321
NM_009952	7170	335	-6835	2.04672
NM_009952	7170	346	-6824	2.04826
NM_009952	7170	351	-6819	2.04895
NM_009952	7170	355	-6815	2.04951
NM_009952	7170	499	-6671	2.0696
NM_009952	7170	865	-6305	2.12064
NM_009952	7170	1105	-6065	2.15411
NM_009952	7170	1234	-5936	2.17211
NM_009952	7170	1246	-5924	2.17378
NM_009952	7170	1293	-5877	2.18033
NM_009952	7170	1399	-5771	2.19512
NM_009952	7170	1511	-5659	2.21074
NM_009952	7170	1565	-5605	2.21827
NM_009952	7170	2237	-4933	2.31199
NM_009952	7170	2333	-4837	2.32538
NM_009952	7170	2548	-4622	2.35537
NM_009952	7170	2687	-4483	2.37476
NM_009952	7170	2870	-4300	2.40028
NM_009952	7170	2882	-4288	2.40195
NM_009952	7170	2943	-4227	2.41046
NM_009952	7170	2948	-4222	2.41116
NM_009952	7170	2972	-4198	2.4145
NM_009952	7170	3024	-4146	2.42176
NM_009952	7170	3081	-4089	2.42971
NM_009952	7170	3115	-4055	2.43445
NM_009952	7170	3148	-4022	2.43905
NM_009952	7170	3391	-3779	2.47294
NM_009952	7170	3766	-3404	2.52524
NM_009952	7170	3907	-3263	2.54491
NM_009952	7170	3954	-3216	2.55146
NM_009952	7170	3981	-3189	2.55523
NM_009952	7170	4048	-3122	2.56457
NM_009952	7170	4152	-3018	2.57908
NM_009952	7170	4184	-2986	2.58354
NM_009952	7170	4458	-2712	2.62176
NM_009952	7170	4615	-2555	2.64365
NM_009952	7170	4623	-2547	2.64477
NM_009952	7170	4860	-2310	2.67782
NM_009952	7170	5155	-2015	2.71897
NM_009952	7170	5322	-1848	2.74226
NM_009952	7170	5643	-1527	2.78703
NM_009952	7170	5670	-1500	2.79079
NM_009952	7170	6247	-923	2.87127
NM_009952	7170	6699	-471	2.93431
NM_009952	7170	6703	-467	2.93487
NM_001310624	4938	71	-4867	2.01438
NM_001310624	4938	76	-4862	2.01539
NM_001310624	4938	245	-4693	2.04962
NM_001310624	4938	435	-4503	2.08809
NM_001310624	4938	508	-4430	2.10288
NM_001310624	4938	645	-4293	2.13062
NM_001310624	4938	738	-4200	2.14945
NM_001310624	4938	943	-3995	2.19097
NM_001310624	4938	947	-3991	2.19178
NM_001310624	4938	953	-3985	2.19299
NM_001310624	4938	1207	-3731	2.24443
NM_001310624	4938	1295	-3643	2.26225
NM_001310624	4938	1451	-3487	2.29384
NM_001310624	4938	1516	-3422	2.30701
NM_001310624	4938	1722	-3216	2.34872
NM_001310624	4938	1728	-3210	2.34994
NM_001310624	4938	1857	-3081	2.37606
NM_001310624	4938	1931	-3007	2.39105
NM_001310624	4938	1954	-2984	2.39571
NM_001310624	4938	1959	-2979	2.39672
NM_001310624	4938	1964	-2974	2.39773
NM_001310624	4938	1991	-2947	2.4032
NM_001310624	4938	2021	-2917	2.40928
NM_001310624	4938	2060	-2878	2.41717
NM_001310624	4938	2316	-2622	2.46902
NM_001310624	4938	2713	-2225	2.54941
NM_001310624	4938	2776	-2162	2.56217
NM_001310624	4938	2929	-2009	2.59316
NM_001310624	4938	2939	-1999	2.59518
NM_001310624	4938	2957	-1981	2.59883
NM_001310624	4938	3238	-1700	2.65573
NM_001310624	4938	4604	-334	2.93236
NM_001310624	4938	4624	-314	2.93641
NM_001310624	4938	4636	-302	2.93884
NM_001310624	4938	4750	-188	2.96193
NM_001310624	4938	4841	-97	2.98036
NM_026195	732	15	-717	2.02049
NM_026195	732	167	-565	2.22814
NM_026195	732	367	-365	2.50137
NM_026195	732	480	-252	2.65574
NM_009084	248	73	-175	2.29435
NM_009084	248	132	-116	2.53226
NM_029711	414	274	-140	2.66184
NM_029711	414	290	-124	2.70048
NM_029711	414	329	-85	2.79469
NM_021383	1988	253	-1735	2.12726
NM_021383	1988	454	-1534	2.22837
NM_021383	1988	471	-1517	2.23692
NM_021383	1988	498	-1490	2.2505
NM_021383	1988	549	-1439	2.27616
NM_021383	1988	561	-1427	2.28219
NM_021383	1988	1145	-843	2.57596
NM_021383	1988	1209	-779	2.60815
NM_021383	1988	1247	-741	2.62726
NM_021383	1988	1930	-58	2.97082
NM_021383	1988	1984	-4	2.99799
NM_170755	854	394	-460	2.46136
NM_170755	854	820	-34	2.96019
NM_027886	1100	330	-770	2.3
NM_027886	1100	1042	-58	2.94727
NM_001033606	1328	109	-1219	2.08208
NM_001033606	1328	555	-773	2.41792
NM_001033606	1328	781	-547	2.5881
NM_001033606	1328	901	-427	2.67846
NM_001033606	1328	983	-345	2.74021
NM_001033606	1328	1175	-153	2.88479
NM_001081210	307	152	-155	2.49511
NM_001081210	307	170	-137	2.55375
NM_010472	5943	77	-5866	2.01296
NM_010472	5943	241	-5702	2.04055
NM_010472	5943	345	-5598	2.05805
NM_010472	5943	359	-5584	2.06041
NM_010472	5943	571	-5372	2.09608
NM_010472	5943	623	-5320	2.10483
NM_010472	5943	974	-4969	2.16389
NM_010472	5943	1087	-4856	2.1829
NM_010472	5943	1126	-4817	2.18947
NM_010472	5943	1191	-4752	2.2004
NM_010472	5943	1210	-4733	2.2036
NM_010472	5943	1374	-4569	2.2312
NM_010472	5943	1420	-4523	2.23894
NM_010472	5943	1559	-4384	2.26233
NM_010472	5943	1693	-4250	2.28487
NM_010472	5943	1886	-4057	2.31735
NM_010472	5943	2420	-3523	2.4072
NM_010472	5943	2607	-3336	2.43867
NM_010472	5943	2762	-3181	2.46475
NM_010472	5943	3111	-2832	2.52347
NM_010472	5943	3144	-2799	2.52903
NM_010472	5943	3187	-2756	2.53626
NM_010472	5943	3314	-2629	2.55763
NM_010472	5943	3433	-2510	2.57765
NM_010472	5943	3438	-2505	2.5785
NM_010472	5943	3751	-2192	2.63116
NM_010472	5943	3779	-2164	2.63587
NM_010472	5943	3826	-2117	2.64378
NM_010472	5943	4322	-1621	2.72724
NM_010472	5943	4463	-1480	2.75097
NM_010472	5943	4549	-1394	2.76544
NM_010472	5943	4771	-1172	2.80279
NM_010472	5943	4917	-1026	2.82736
NM_010472	5943	5046	-897	2.84907
NM_010472	5943	5600	-343	2.94229
NM_010472	5943	5715	-228	2.96164
NM_010472	5943	5797	-146	2.97543
NM_133781	2356	103	-2253	2.04372
NM_133781	2356	135	-2221	2.0573
NM_133781	2356	630	-1726	2.2674
NM_133781	2356	653	-1703	2.27716
NM_133781	2356	688	-1668	2.29202
NM_133781	2356	781	-1575	2.33149
NM_133781	2356	1103	-1253	2.46817
NM_133781	2356	1108	-1248	2.47029
NM_133781	2356	1113	-1243	2.47241
NM_133781	2356	1118	-1238	2.47453
NM_133781	2356	1509	-847	2.64049
NM_133781	2356	2046	-310	2.86842
NM_133781	2356	2160	-196	2.91681
NM_133781	2356	2249	-107	2.95458
NM_133781	2356	2266	-90	2.9618
NM_022417	1060	856	-204	2.80755
NM_022417	1060	870	-190	2.82075
NM_008972	699	259	-440	2.37053
NM_008972	699	300	-399	2.42918
NM_008972	699	601	-98	2.8598
NM_008972	699	620	-79	2.88698
NM_172974	1612	540	-1072	2.33499
NM_172974	1612	672	-940	2.41687
NM_172974	1612	1066	-546	2.66129
NM_172974	1612	1215	-397	2.75372
NM_172974	1612	1442	-170	2.89454
NM_172974	1612	1532	-80	2.95037
NM_172974	1612	1576	-36	2.97767
NM_177646	2017	106	-1911	2.05255
NM_177646	2017	557	-1460	2.27615
NM_177646	2017	608	-1409	2.30144
NM_177646	2017	620	-1397	2.30739
NM_177646	2017	931	-1086	2.46158
NM_177646	2017	1261	-756	2.62519
NM_177646	2017	1654	-363	2.82003
NM_177646	2017	1668	-349	2.82697
NM_177646	2017	1939	-78	2.96133
NM_177646	2017	2004	-13	2.99355
NM_133816	1736	514	-1222	2.29608
NM_133816	1736	1368	-368	2.78802
NM_133805	1088	514	-574	2.47243
NM_133805	1088	1010	-78	2.92831
NM_001159719	2038	139	-1899	2.0682
NM_001159719	2038	146	-1892	2.07164
NM_001159719	2038	153	-1885	2.07507
NM_001159719	2038	210	-1828	2.10304
NM_001159719	2038	300	-1738	2.1472
NM_001159719	2038	359	-1679	2.17615
NM_001159719	2038	581	-1457	2.28508
NM_001159719	2038	663	-1375	2.32532
NM_001159719	2038	706	-1332	2.34642
NM_001159719	2038	975	-1063	2.47841
NM_001159719	2038	1226	-812	2.60157
NM_001159719	2038	1566	-472	2.7684
NM_001159719	2038	1708	-330	2.83808
NM_001159719	2038	1797	-241	2.88175
NM_001159719	2038	2026	-12	2.99411
NM_026321	1345	210	-1135	2.15613
NM_026321	1345	246	-1099	2.1829
NM_026321	1345	268	-1077	2.19926
NM_026321	1345	461	-884	2.34275
NM_026321	1345	559	-786	2.41561
NM_026321	1345	599	-746	2.44535
NM_026321	1345	632	-713	2.46989
NM_026321	1345	970	-375	2.72119
NM_026321	1345	1045	-300	2.77695
NM_026321	1345	1087	-258	2.80818
NM_026321	1345	1188	-157	2.88327
NM_026472	890	41	-849	2.04607
NM_026472	890	117	-773	2.13146
NM_026472	890	262	-628	2.29438
NM_026472	890	604	-286	2.67865
NM_001293301	2468	866	-1602	2.35089
NM_001293301	2468	875	-1593	2.35454
NM_001293301	2468	1419	-1049	2.57496
NM_001293301	2468	1887	-581	2.76459
NM_001293301	2468	2299	-169	2.93152
NM_001293301	2468	2303	-165	2.93314
NM_001293301	2468	2331	-137	2.94449
NM_001293301	2468	2363	-105	2.95746
NM_001293301	2468	2415	-53	2.97853
NM_146103	1420	269	-1151	2.18944
NM_146103	1420	307	-1113	2.2162
NM_146103	1420	311	-1109	2.21901
NM_146103	1420	346	-1074	2.24366
NM_146103	1420	468	-952	2.32958
NM_146103	1420	498	-922	2.3507
NM_146103	1420	592	-828	2.4169
NM_146103	1420	603	-817	2.42465
NM_146103	1420	644	-776	2.45352
NM_146103	1420	1086	-334	2.76479
NM_146103	1420	1115	-305	2.78521
NM_146103	1420	1312	-108	2.92394
NM_028787	943	76	-867	2.08059
NM_028787	943	165	-778	2.17497
NM_028787	943	282	-661	2.29905
NM_028787	943	382	-561	2.40509
NM_028787	943	657	-286	2.69671
NM_028787	943	759	-184	2.80488
NM_181750	977	64	-913	2.06551
NM_181750	977	102	-875	2.1044
NM_181750	977	114	-863	2.11668
NM_181750	977	225	-752	2.2303
NM_181750	977	275	-702	2.28147
NM_181750	977	824	-153	2.8434
NM_181750	977	833	-144	2.85261
NM_181750	977	966	-11	2.98874
NM_175294	5115	8	-5107	2.00156
NM_175294	5115	115	-5000	2.02248
NM_175294	5115	167	-4948	2.03265
NM_175294	5115	171	-4944	2.03343
NM_175294	5115	188	-4927	2.03675
NM_175294	5115	192	-4923	2.03754
NM_175294	5115	196	-4919	2.03832
NM_175294	5115	403	-4712	2.07879
NM_175294	5115	488	-4627	2.09541
NM_175294	5115	847	-4268	2.16559
NM_175294	5115	962	-4153	2.18807
NM_175294	5115	996	-4119	2.19472
NM_175294	5115	1099	-4016	2.21486
NM_175294	5115	1218	-3897	2.23812
NM_175294	5115	1310	-3805	2.25611
NM_175294	5115	1344	-3771	2.26276
NM_175294	5115	1610	-3505	2.31476
NM_175294	5115	1626	-3489	2.31789
NM_175294	5115	2060	-3055	2.40274
NM_175294	5115	2224	-2891	2.4348
NM_175294	5115	2335	-2780	2.4565
NM_175294	5115	2639	-2476	2.51593
NM_175294	5115	3020	-2095	2.59042
NM_175294	5115	3025	-2090	2.5914
NM_175294	5115	3030	-2085	2.59238
NM_175294	5115	3665	-1450	2.71652
NM_175294	5115	3670	-1445	2.7175
NM_175294	5115	3675	-1440	2.71848
NM_175294	5115	3696	-1419	2.72258
NM_175294	5115	3735	-1380	2.73021
NM_175294	5115	4072	-1043	2.79609
NM_175294	5115	4077	-1038	2.79707
NM_175294	5115	4180	-935	2.8172
NM_175294	5115	4257	-858	2.83226
NM_175294	5115	4899	-216	2.95777
NM_175294	5115	5073	-42	2.99179
NM_175294	5115	5078	-37	2.99277
NM_172516	3448	173	-3275	2.05017
NM_172516	3448	227	-3221	2.06584
NM_172516	3448	282	-3166	2.08179
NM_172516	3448	480	-2968	2.13921
NM_172516	3448	542	-2906	2.15719
NM_172516	3448	607	-2841	2.17604
NM_172516	3448	733	-2715	2.21259
NM_172516	3448	1230	-2218	2.35673
NM_172516	3448	2208	-1240	2.64037
NM_172516	3448	2252	-1196	2.65313
NM_172516	3448	2448	-1000	2.70998
NM_172516	3448	3116	-332	2.90371
NM_172516	3448	3122	-326	2.90545
NM_172516	3448	3138	-310	2.91009
NM_172516	3448	3150	-298	2.91357
NM_172516	3448	3272	-176	2.94896
NM_172516	3448	3295	-153	2.95563
NM_172516	3448	3299	-149	2.95679
NM_172516	3448	3306	-142	2.95882
NM_172516	3448	3310	-138	2.95998
NM_172516	3448	3315	-133	2.96143
NM_172516	3448	3396	-52	2.98492
NM_001357486	1873	137	-1736	2.07314
NM_001357486	1873	300	-1573	2.16017
NM_001357486	1873	448	-1425	2.23919
NM_001357486	1873	652	-1221	2.3481
NM_001357486	1873	792	-1081	2.42285
NM_001357486	1873	1114	-759	2.59477
NM_001357486	1873	1423	-450	2.75974
NM_001357486	1873	1765	-108	2.94234
NM_001357486	1873	1858	-15	2.99199
NM_133819	2913	82	-2831	2.02815
NM_133819	2913	255	-2658	2.08754
NM_133819	2913	317	-2596	2.10882
NM_133819	2913	348	-2565	2.11946
NM_133819	2913	844	-2069	2.28974
NM_133819	2913	854	-2059	2.29317
NM_133819	2913	866	-2047	2.29729
NM_133819	2913	946	-1967	2.32475
NM_133819	2913	956	-1957	2.32818
NM_133819	2913	962	-1951	2.33024
NM_133819	2913	968	-1945	2.3323
NM_133819	2913	1012	-1901	2.34741
NM_133819	2913	1262	-1651	2.43323
NM_133819	2913	1632	-1281	2.56025
NM_133819	2913	1655	-1258	2.56814
NM_133819	2913	1945	-968	2.6677
NM_133819	2913	2267	-646	2.77824
NM_133819	2913	2380	-533	2.81703
NM_001311136	1415	3	-1412	2.00212
NM_001311136	1415	80	-1335	2.05654
NM_001311136	1415	144	-1271	2.10177
NM_001311136	1415	284	-1131	2.20071
NM_001311136	1415	326	-1089	2.23039
NM_001311136	1415	548	-867	2.38728
NM_001311136	1415	703	-712	2.49682
NM_001311136	1415	1039	-376	2.73428
NM_001311136	1415	1186	-229	2.83816
NM_001311136	1415	1349	-66	2.95336
NM_152895	1504	212	-1292	2.14096
NM_152895	1504	244	-1260	2.16223
NM_152895	1504	921	-583	2.61237
NM_152895	1504	1361	-143	2.90492
NM_152895	1504	1498	-6	2.99601
NM_026024	233	50	-183	2.21459
NM_026024	233	76	-157	2.32618
NM_026024	233	104	-129	2.44635
NM_026024	233	146	-87	2.62661
NM_026024	233	212	-21	2.90987
NM_026024	233	223	-10	2.95708
NM_026823	997	161	-836	2.16148
NM_026823	997	330	-667	2.33099
NM_026823	997	826	-171	2.82849
NM_026823	997	830	-167	2.8325
NM_026823	997	834	-163	2.83651
NM_026823	997	838	-159	2.84052
NM_026823	997	842	-155	2.84453
NM_026823	997	846	-151	2.84855
NM_026823	997	916	-81	2.91876
NM_177643	2424	41	-2383	2.01691
NM_177643	2424	71	-2353	2.02929
NM_177643	2424	141	-2283	2.05817
NM_177643	2424	161	-2263	2.06642
NM_177643	2424	226	-2198	2.09323
NM_177643	2424	491	-1933	2.20256
NM_177643	2424	844	-1580	2.34818
NM_177643	2424	865	-1559	2.35685
NM_177643	2424	958	-1466	2.39521
NM_177643	2424	1178	-1246	2.48597
NM_177643	2424	1495	-929	2.61675
NM_177643	2424	1531	-893	2.6316
NM_177643	2424	1577	-847	2.65058
NM_177643	2424	1663	-761	2.68606
NM_177643	2424	1677	-747	2.69183
NM_177643	2424	1805	-619	2.74464
NM_177643	2424	1961	-463	2.80899
NM_177643	2424	2033	-391	2.8387
NM_177643	2424	2065	-359	2.8519
NM_177643	2424	2375	-49	2.97979
NM_133780	148	45	-103	2.30405
NM_133780	148	77	-71	2.52027
NM_054102	1080	45	-1035	2.04167
NM_054102	1080	159	-921	2.14722
NM_054102	1080	189	-891	2.175
NM_054102	1080	308	-772	2.28519
NM_054102	1080	474	-606	2.43889
NM_054102	1080	638	-442	2.59074
NM_054102	1080	728	-352	2.67407
NM_054102	1080	910	-170	2.84259
NM_026369	1258	95	-1163	2.07552
NM_026369	1258	214	-1044	2.17011
NM_026369	1258	477	-781	2.37917
NM_026369	1258	575	-683	2.45707
NM_026369	1258	921	-337	2.73211
NM_026369	1258	934	-324	2.74245
NM_026369	1258	977	-281	2.77663
NM_026369	1258	1175	-83	2.93402
NM_026369	1258	1197	-61	2.95151
NM_026369	1258	1207	-51	2.95946
NM_001033162	110	26	-84	2.23636
NM_001033162	110	77	-33	2.7
NM_001033162	110	100	-10	2.90909
NM_008131	1541	384	-1157	2.24919
NM_008131	1541	622	-919	2.40363
NM_008131	1541	976	-565	2.63335
NM_008131	1541	1136	-405	2.73718
NM_008131	1541	1140	-401	2.73978
NM_008131	1541	1235	-306	2.80143
NM_008131	1541	1336	-205	2.86697
NM_008131	1541	1496	-45	2.9708
NM_021433	1501	460	-1041	2.30646
NM_021433	1501	465	-1036	2.30979
NM_021433	1501	490	-1011	2.32645
NM_021433	1501	585	-916	2.38974
NM_021433	1501	1420	-81	2.94604
NM_021433	1501	1425	-76	2.94937
NM_001160180	1463	73	-1390	2.0499
NM_001160180	1463	79	-1384	2.054
NM_001160180	1463	216	-1247	2.14764
NM_001160180	1463	450	-1013	2.30759
NM_001160180	1463	468	-995	2.31989
NM_001160180	1463	651	-812	2.44498
NM_001160180	1463	711	-752	2.48599
NM_001160180	1463	1021	-442	2.69788
NM_001160180	1463	1274	-189	2.87081
NM_001160180	1463	1280	-183	2.87491
NM_009595	6903	108	-6795	2.01565
NM_009595	6903	461	-6442	2.06678
NM_009595	6903	709	-6194	2.10271
NM_009595	6903	1401	-5502	2.20296
NM_009595	6903	1458	-5445	2.21121
NM_009595	6903	1606	-5297	2.23265
NM_009595	6903	2097	-4806	2.30378
NM_009595	6903	2121	-4782	2.30726
NM_009595	6903	2125	-4778	2.30784
NM_009595	6903	2129	-4774	2.30842
NM_009595	6903	3017	-3886	2.43706
NM_009595	6903	3077	-3826	2.44575
NM_009595	6903	3124	-3779	2.45256
NM_009595	6903	3517	-3386	2.50949
NM_009595	6903	3650	-3253	2.52876
NM_009595	6903	3922	-2981	2.56816
NM_009595	6903	4225	-2678	2.61205
NM_009595	6903	4381	-2522	2.63465
NM_009595	6903	4935	-1968	2.71491
NM_009595	6903	4996	-1907	2.72374
NM_009595	6903	5041	-1862	2.73026
NM_009595	6903	5613	-1290	2.81312
NM_009595	6903	5800	-1103	2.84021
NM_009595	6903	5921	-982	2.85774
NM_009595	6903	5955	-948	2.86267
NM_009595	6903	6244	-659	2.90453
NM_009595	6903	6449	-454	2.93423
NM_009595	6903	6541	-362	2.94756
NM_009595	6903	6716	-187	2.97291
NM_009595	6903	6739	-164	2.97624
NM_009595	6903	6789	-114	2.98349
NM_009595	6903	6832	-71	2.98971
NM_009595	6903	6867	-36	2.99478
NM_001347121	1576	86	-1490	2.05457
NM_001347121	1576	236	-1340	2.14975
NM_001347121	1576	463	-1113	2.29378
NM_001347121	1576	501	-1075	2.31789
NM_001347121	1576	662	-914	2.42005
NM_001347121	1576	718	-858	2.45558
NM_001347121	1576	722	-854	2.45812
NM_001347121	1576	770	-806	2.48858
NM_001347121	1576	871	-705	2.55266
NM_001347121	1576	1001	-575	2.63515
NM_001347121	1576	1065	-511	2.67576
NM_001347121	1576	1142	-434	2.72462
NM_001347121	1576	1323	-253	2.83947
NM_001024952	7179	238	-6941	2.03315
NM_001024952	7179	330	-6849	2.04597
NM_001024952	7179	557	-6622	2.07759
NM_001024952	7179	591	-6588	2.08232
NM_001024952	7179	672	-6507	2.09361
NM_001024952	7179	740	-6439	2.10308
NM_001024952	7179	749	-6430	2.10433
NM_001024952	7179	892	-6287	2.12425
NM_001024952	7179	958	-6221	2.13344
NM_001024952	7179	1240	-5939	2.17273
NM_001024952	7179	1399	-5780	2.19487
NM_001024952	7179	1472	-5707	2.20504
NM_001024952	7179	1520	-5659	2.21173
NM_001024952	7179	1736	-5443	2.24182
NM_001024952	7179	1882	-5297	2.26215
NM_001024952	7179	2058	-5121	2.28667
NM_001024952	7179	2282	-4897	2.31787
NM_001024952	7179	2439	-4740	2.33974
NM_001024952	7179	2760	-4419	2.38445
NM_001024952	7179	2842	-4337	2.39588
NM_001024952	7179	2892	-4287	2.40284
NM_001024952	7179	3270	-3909	2.4555
NM_001024952	7179	3308	-3871	2.46079
NM_001024952	7179	3482	-3697	2.48503
NM_001024952	7179	3542	-3637	2.49338
NM_001024952	7179	4012	-3167	2.55885
NM_001024952	7179	4105	-3074	2.57181
NM_001024952	7179	4193	-2986	2.58406
NM_001024952	7179	4432	-2747	2.61736
NM_001024952	7179	4642	-2537	2.64661
NM_001024952	7179	4657	-2522	2.6487
NM_001024952	7179	4941	-2238	2.68826
NM_001024952	7179	4946	-2233	2.68895
NM_001024952	7179	5015	-2164	2.69857
NM_001024952	7179	5491	-1688	2.76487
NM_001024952	7179	5674	-1505	2.79036
NM_001024952	7179	5817	-1362	2.81028
NM_001024952	7179	5853	-1326	2.81529
NM_001024952	7179	5858	-1321	2.81599
NM_001024952	7179	5868	-1311	2.81738
NM_001024952	7179	6199	-980	2.86349
NM_001024952	7179	6204	-975	2.86419
NM_001024952	7179	6450	-729	2.89845
NM_001024952	7179	6477	-702	2.90221
NM_001024952	7179	6587	-592	2.91754
NM_001024952	7179	6702	-477	2.93356
NM_001024952	7179	6762	-417	2.94191
NM_001024952	7179	6829	-350	2.95125
NM_001024952	7179	6939	-240	2.96657
NM_001024952	7179	6964	-215	2.97005
NM_028664	2819	234	-2585	2.08301
NM_028664	2819	545	-2274	2.19333
NM_028664	2819	850	-1969	2.30153
NM_028664	2819	1130	-1689	2.40085
NM_028664	2819	1140	-1679	2.4044
NM_028664	2819	1558	-1261	2.55268
NM_028664	2819	2391	-428	2.84817
NM_028664	2819	2605	-214	2.92409
NM_028664	2819	2644	-175	2.93792
NM_028664	2819	2718	-101	2.96417
NM_001356527	4506	273	-4233	2.06059
NM_001356527	4506	321	-4185	2.07124
NM_001356527	4506	525	-3981	2.11651
NM_001356527	4506	705	-3801	2.15646
NM_001356527	4506	1319	-3187	2.29272
NM_001356527	4506	1356	-3150	2.30093
NM_001356527	4506	1770	-2736	2.39281
NM_001356527	4506	1868	-2638	2.41456
NM_001356527	4506	1892	-2614	2.41988
NM_001356527	4506	2038	-2468	2.45229
NM_001356527	4506	2202	-2304	2.48868
NM_001356527	4506	2580	-1926	2.57257
NM_001356527	4506	2712	-1794	2.60186
NM_001356527	4506	2837	-1669	2.6296
NM_001356527	4506	2931	-1575	2.65047
NM_001356527	4506	3189	-1317	2.70772
NM_001356527	4506	3228	-1278	2.71638
NM_001356527	4506	3244	-1262	2.71993
NM_001356527	4506	3506	-1000	2.77807
NM_001356527	4506	3510	-996	2.77896
NM_001356527	4506	3514	-992	2.77985
NM_001356527	4506	3518	-988	2.78074
NM_001356527	4506	3522	-984	2.78162
NM_001356527	4506	3537	-969	2.78495
NM_001356527	4506	3773	-733	2.83733
NM_001356527	4506	3847	-659	2.85375
NM_001356527	4506	4169	-337	2.92521
NM_001356527	4506	4247	-259	2.94252
NM_001356527	4506	4406	-100	2.97781
NM_001039483	3713	87	-3626	2.02343
NM_001039483	3713	342	-3371	2.09211
NM_001039483	3713	400	-3313	2.10773
NM_001039483	3713	417	-3296	2.11231
NM_001039483	3713	594	-3119	2.15998
NM_001039483	3713	1158	-2555	2.31188
NM_001039483	3713	1552	-2161	2.41799
NM_001039483	3713	1828	-1885	2.49232
NM_001039483	3713	2166	-1547	2.58336
NM_001039483	3713	3085	-628	2.83086
NM_001039483	3713	3192	-521	2.85968
NM_011070	1228	101	-1127	2.08225
NM_011070	1228	127	-1101	2.10342
NM_011070	1228	370	-858	2.3013
NM_011070	1228	444	-784	2.36156
NM_011070	1228	543	-685	2.44218
NM_011070	1228	1089	-139	2.88681
NM_172647	1499	553	-946	2.36891
NM_172647	1499	820	-679	2.54703
NM_172647	1499	859	-640	2.57305
NM_172647	1499	869	-630	2.57972
NM_172647	1499	1230	-269	2.82055
NM_172647	1499	1376	-123	2.91795
NM_009938	573	258	-315	2.45026
NM_009938	573	366	-207	2.63874
NM_009938	573	495	-78	2.86387
NM_001357204	1721	111	-1610	2.0645
NM_001357204	1721	314	-1407	2.18245
NM_001357204	1721	408	-1313	2.23707
NM_001357204	1721	436	-1285	2.25334
NM_001357204	1721	475	-1246	2.276
NM_001357204	1721	742	-979	2.43114
NM_001355103	2868	871	-1997	2.3037
NM_001355103	2868	905	-1963	2.31555
NM_001355103	2868	1126	-1742	2.39261
NM_001355103	2868	1131	-1737	2.39435
NM_001355103	2868	1136	-1732	2.39609
NM_001355103	2868	1141	-1727	2.39784
NM_001355103	2868	1440	-1428	2.50209
NM_001355103	2868	1602	-1266	2.55858
NM_001355103	2868	1686	-1182	2.58787
NM_001355103	2868	1776	-1092	2.61925
NM_001355103	2868	1842	-1026	2.64226
NM_001355103	2868	1955	-913	2.68166
NM_001355103	2868	2237	-631	2.77999
NM_001355103	2868	2241	-627	2.78138
NM_001355103	2868	2300	-568	2.80195
NM_001355103	2868	2331	-537	2.81276
NM_001355103	2868	2423	-445	2.84484
NM_001355103	2868	2450	-418	2.85425
NM_001355103	2868	2579	-289	2.89923
NM_001355103	2868	2755	-113	2.9606
NM_001355103	2868	2790	-78	2.9728
NM_024282	3129	271	-2858	2.08661
NM_024282	3129	287	-2842	2.09172
NM_024282	3129	319	-2810	2.10195
NM_024282	3129	509	-2620	2.16267
NM_024282	3129	514	-2615	2.16427
NM_024282	3129	771	-2358	2.2464
NM_024282	3129	785	-2344	2.25088
NM_024282	3129	1216	-1913	2.38862
NM_024282	3129	1544	-1585	2.49345
NM_024282	3129	1557	-1572	2.4976
NM_024282	3129	1618	-1511	2.5171
NM_024282	3129	1813	-1316	2.57942
NM_024282	3129	1839	-1290	2.58773
NM_024282	3129	1865	-1264	2.59604
NM_024282	3129	2302	-827	2.7357
NM_024282	3129	2318	-811	2.74081
NM_024282	3129	2368	-761	2.75679
NM_024282	3129	2663	-466	2.85107
NM_024282	3129	2782	-347	2.8891
NM_024282	3129	2804	-325	2.89613
NM_024282	3129	2887	-242	2.92266
NM_024282	3129	3022	-107	2.9658
NM_024282	3129	3081	-48	2.98466
NM_001346804	3437	371	-3066	2.10794
NM_001346804	3437	429	-3008	2.12482
NM_001346804	3437	440	-2997	2.12802
NM_001346804	3437	569	-2868	2.16555
NM_001346804	3437	1332	-2105	2.38755
NM_001346804	3437	1708	-1729	2.49695
NM_001346804	3437	2242	-1195	2.65231
NM_001346804	3437	2330	-1107	2.67792
NM_001346804	3437	2456	-981	2.71458
NM_001346804	3437	2553	-884	2.7428
NM_001346804	3437	2572	-865	2.74833
NM_007415	468	208	-260	2.44444
NM_007415	468	287	-181	2.61325
NM_007415	468	424	-44	2.90598
NM_001103182	1314	230	-1084	2.17504
NM_001103182	1314	296	-1018	2.22527
NM_001103182	1314	533	-781	2.40563
NM_001103182	1314	621	-693	2.4726
NM_001103182	1314	723	-591	2.55023
NM_001103182	1314	782	-532	2.59513
NM_001103182	1314	907	-407	2.69026
NM_001103182	1314	912	-402	2.69406
NM_001103182	1314	922	-392	2.70167
NM_001103182	1314	989	-325	2.75266
NM_001103182	1314	1026	-288	2.78082
NM_001103182	1314	1237	-77	2.9414
NM_001103182	1314	1242	-72	2.94521
NM_133225	1834	87	-1747	2.04744
NM_133225	1834	259	-1575	2.14122
NM_133225	1834	528	-1306	2.2879
NM_133225	1834	706	-1128	2.38495
NM_133225	1834	925	-909	2.50436
NM_133225	1834	1298	-536	2.70774
NM_133225	1834	1335	-499	2.72792
NM_133225	1834	1379	-455	2.75191
NM_133225	1834	1420	-414	2.77426
NM_133225	1834	1599	-235	2.87186
NM_133225	1834	1662	-172	2.90622
NM_133225	1834	1786	-48	2.97383
NM_133225	1834	1807	-27	2.98528
NM_133225	1834	1813	-21	2.98855
NM_145943	1821	169	-1652	2.09281
NM_145943	1821	182	-1639	2.09995
NM_145943	1821	191	-1630	2.10489
NM_145943	1821	437	-1384	2.23998
NM_145943	1821	578	-1243	2.31741
NM_145943	1821	677	-1144	2.37177
NM_145943	1821	768	-1053	2.42175
NM_145943	1821	774	-1047	2.42504
NM_145943	1821	787	-1034	2.43218
NM_145943	1821	1393	-428	2.76496
NM_145943	1821	1505	-316	2.82647
NM_145943	1821	1688	-133	2.92696
NM_145943	1821	1716	-105	2.94234
NM_012058	960	358	-602	2.37292
NM_012058	960	492	-468	2.5125
NM_012058	960	633	-327	2.65937
NM_012058	960	832	-128	2.86667
NM_012058	960	898	-62	2.93542
NM_173378	708	423	-285	2.59746
NM_173378	708	440	-268	2.62147
NM_173378	708	563	-145	2.7952
NM_173378	708	625	-83	2.88277
NM_021421	1400	108	-1292	2.07714
NM_021421	1400	184	-1216	2.13143
NM_021421	1400	221	-1179	2.15786
NM_021421	1400	936	-464	2.66857
NM_021421	1400	1046	-354	2.74714
NM_021421	1400	1371	-29	2.97929
NM_178632	2226	83	-2143	2.03729
NM_178632	2226	141	-2085	2.06334
NM_178632	2226	162	-2064	2.07278
NM_178632	2226	696	-1530	2.31267
NM_178632	2226	707	-1519	2.31761
NM_178632	2226	769	-1457	2.34546
NM_178632	2226	848	-1378	2.38095
NM_178632	2226	1218	-1008	2.54717
NM_178632	2226	1296	-930	2.58221
NM_178632	2226	1378	-848	2.61905
NM_178632	2226	2046	-180	2.91914
NM_178632	2226	2119	-107	2.95193
NM_178632	2226	2130	-96	2.95687
NM_009579	3492	243	-3249	2.06959
NM_009579	3492	254	-3238	2.07274
NM_009579	3492	341	-3151	2.09765
NM_009579	3492	398	-3094	2.11397
NM_009579	3492	451	-3041	2.12915
NM_009579	3492	557	-2935	2.15951
NM_009579	3492	770	-2722	2.2205
NM_009579	3492	1427	-2065	2.40865
NM_009579	3492	1662	-1830	2.47595
NM_009579	3492	1755	-1737	2.50258
NM_009579	3492	1942	-1550	2.55613
NM_009579	3492	1946	-1546	2.55727
NM_009579	3492	2068	-1424	2.59221
NM_009579	3492	2173	-1319	2.62228
NM_009579	3492	2578	-914	2.73826
NM_009579	3492	2607	-885	2.74656
NM_009579	3492	2675	-817	2.76604
NM_009579	3492	2685	-807	2.7689
NM_009579	3492	2694	-798	2.77148
NM_009579	3492	2793	-699	2.79983
NM_009579	3492	2833	-659	2.81128
NM_009579	3492	2983	-509	2.85424
NM_009579	3492	2988	-504	2.85567
NM_009579	3492	3082	-410	2.88259
NM_009579	3492	3339	-153	2.95619
NM_009579	3492	3354	-138	2.96048
NM_009579	3492	3400	-92	2.97365
NM_009579	3492	3441	-51	2.9854
NM_016851	2529	267	-2262	2.10558
NM_016851	2529	401	-2128	2.15856
NM_016851	2529	442	-2087	2.17477
NM_016851	2529	517	-2012	2.20443
NM_016851	2529	1000	-1529	2.39541
NM_016851	2529	1222	-1307	2.48319
NM_016851	2529	1546	-983	2.61131
NM_016851	2529	2197	-332	2.86872
NM_016851	2529	2374	-155	2.93871
NM_173443	5860	30	-5830	2.00512
NM_173443	5860	124	-5736	2.02116
NM_173443	5860	317	-5543	2.0541
NM_173443	5860	324	-5536	2.05529
NM_173443	5860	378	-5482	2.06451
NM_173443	5860	740	-5120	2.12628
NM_173443	5860	904	-4956	2.15427
NM_173443	5860	1097	-4763	2.1872
NM_173443	5860	1118	-4742	2.19078
NM_173443	5860	1165	-4695	2.19881
NM_173443	5860	1207	-4653	2.20597
NM_173443	5860	1234	-4626	2.21058
NM_173443	5860	1280	-4580	2.21843
NM_173443	5860	1355	-4505	2.23123
NM_173443	5860	1440	-4420	2.24573
NM_173443	5860	1499	-4361	2.2558
NM_173443	5860	1866	-3994	2.31843
NM_173443	5860	2073	-3787	2.35375
NM_173443	5860	2307	-3553	2.39369
NM_173443	5860	2745	-3115	2.46843
NM_173443	5860	2754	-3106	2.46997
NM_173443	5860	3072	-2788	2.52423
NM_173443	5860	3214	-2646	2.54846
NM_173443	5860	3709	-2151	2.63294
NM_173443	5860	3866	-1994	2.65973
NM_173443	5860	3946	-1914	2.67338
NM_173443	5860	4089	-1771	2.69778
NM_173443	5860	4258	-1602	2.72662
NM_173443	5860	4287	-1573	2.73157
NM_173443	5860	4343	-1517	2.74113
NM_173443	5860	4536	-1324	2.77406
NM_173443	5860	4936	-924	2.84232
NM_173443	5860	5337	-523	2.91075
NM_173443	5860	5379	-481	2.91792
NM_173443	5860	5824	-36	2.99386
NM_001102430	1325	12	-1313	2.00906
NM_001102430	1325	26	-1299	2.01962
NM_001102430	1325	85	-1240	2.06415
NM_001102430	1325	383	-942	2.28906
NM_001102430	1325	584	-741	2.44075
NM_001102430	1325	1105	-220	2.83396
NM_001102430	1325	1268	-57	2.95698
NM_001102430	1325	1277	-48	2.96377
NM_001102430	1325	1284	-41	2.96906
NM_001102430	1325	1288	-37	2.97208
NM_008678	3656	333	-3323	2.09108
NM_008678	3656	647	-3009	2.17697
NM_008678	3656	683	-2973	2.18682
NM_008678	3656	733	-2923	2.20049
NM_008678	3656	744	-2912	2.2035
NM_008678	3656	1079	-2577	2.29513
NM_008678	3656	1188	-2468	2.32495
NM_008678	3656	1293	-2363	2.35367
NM_008678	3656	1351	-2305	2.36953
NM_008678	3656	1441	-2215	2.39415
NM_008678	3656	1505	-2151	2.41165
NM_008678	3656	1727	-1929	2.47237
NM_008678	3656	2181	-1475	2.59655
NM_008678	3656	2280	-1376	2.62363
NM_008678	3656	2749	-907	2.75191
NM_008678	3656	2888	-768	2.78993
NM_008678	3656	2984	-672	2.81619
NM_008678	3656	3089	-567	2.84491
NM_008678	3656	3191	-465	2.87281
NM_008678	3656	3382	-274	2.92505
NM_008678	3656	3450	-206	2.94365
NM_008678	3656	3561	-95	2.97402
NM_008678	3656	3595	-61	2.98332
NM_001347044	1407	420	-987	2.29851
NM_001347044	1407	458	-949	2.32552
NM_001347044	1407	464	-943	2.32978
NM_001347044	1407	602	-805	2.42786
NM_001347044	1407	878	-529	2.62402
NM_001347044	1407	1121	-286	2.79673
NM_001347044	1407	1180	-227	2.83866
NM_001347044	1407	1251	-156	2.88913
NM_001347044	1407	1364	-43	2.96944
NM_001347044	1407	1396	-11	2.99218
NM_025773	2595	500	-2095	2.19268
NM_025773	2595	603	-1992	2.23237
NM_025773	2595	624	-1971	2.24046
NM_025773	2595	673	-1922	2.25934
NM_025773	2595	773	-1822	2.29788
NM_025773	2595	836	-1759	2.32216
NM_025773	2595	866	-1729	2.33372
NM_025773	2595	927	-1668	2.35723
NM_025773	2595	954	-1641	2.36763
NM_025773	2595	966	-1629	2.37225
NM_025773	2595	975	-1620	2.37572
NM_025773	2595	980	-1615	2.37765
NM_025773	2595	990	-1605	2.3815
NM_025773	2595	998	-1597	2.38459
NM_025773	2595	1125	-1470	2.43353
NM_025773	2595	1191	-1404	2.45896
NM_025773	2595	1243	-1352	2.479
NM_025773	2595	1248	-1347	2.48092
NM_025773	2595	1493	-1102	2.57534
NM_025773	2595	1507	-1088	2.58073
NM_025773	2595	1530	-1065	2.5896
NM_025773	2595	1675	-920	2.64547
NM_025773	2595	1721	-874	2.6632
NM_025773	2595	1860	-735	2.71676
NM_025773	2595	2332	-263	2.89865
NM_025773	2595	2553	-42	2.98382
NM_026456	523	23	-500	2.04398
NM_026456	523	163	-360	2.31166
NM_026456	523	341	-182	2.65201
NM_026456	523	350	-173	2.66922
NM_026456	523	426	-97	2.81453
NM_026456	523	490	-33	2.9369
NM_026456	523	513	-10	2.98088
NM_008563	488	226	-262	2.46311
NM_008563	488	255	-233	2.52254
NM_008563	488	264	-224	2.54098
NM_028534	804	326	-478	2.40547
NM_028534	804	405	-399	2.50373
NM_028534	804	447	-357	2.55597
NM_028534	804	499	-305	2.62065
NM_028534	804	736	-68	2.91542
NM_028534	804	770	-34	2.95771
NM_174997	4204	203	-4001	2.04829
NM_174997	4204	294	-3910	2.06993
NM_174997	4204	1116	-3088	2.26546
NM_174997	4204	1433	-2771	2.34087
NM_174997	4204	2107	-2097	2.50119
NM_174997	4204	2176	-2028	2.5176
NM_174997	4204	2393	-1811	2.56922
NM_174997	4204	2696	-1508	2.64129
NM_174997	4204	2995	-1209	2.71242
NM_174997	4204	3055	-1149	2.72669
NM_174997	4204	3092	-1112	2.73549
NM_174997	4204	3507	-697	2.83421
NM_174997	4204	3895	-309	2.9265
NM_174997	4204	3965	-239	2.94315
NM_174997	4204	4067	-137	2.96741
NM_174997	4204	4148	-56	2.98668
NM_198006	3501	152	-3349	2.04342
NM_198006	3501	354	-3147	2.10111
NM_198006	3501	1165	-2336	2.33276
NM_198006	3501	1421	-2080	2.40588
NM_198006	3501	1541	-1960	2.44016
NM_198006	3501	1847	-1654	2.52756
NM_198006	3501	1886	-1615	2.5387
NM_198006	3501	1964	-1537	2.56098
NM_198006	3501	2511	-990	2.71722
NM_198006	3501	2744	-757	2.78378
NM_198006	3501	2891	-610	2.82576
NM_198006	3501	3107	-394	2.88746
NM_198006	3501	3466	-35	2.99
NM_028096	581	344	-237	2.59208
NM_028096	581	364	-217	2.62651
NM_028096	581	492	-89	2.84682
NM_028096	581	557	-24	2.95869
NM_001359288	301	121	-180	2.40199
NM_001359288	301	182	-119	2.60465
NM_001359288	301	227	-74	2.75415
NM_001359288	301	261	-40	2.86711
NM_001359288	301	271	-30	2.90033
NM_001290814	3458	26	-3432	2.00752
NM_001290814	3458	51	-3407	2.01475
NM_001290814	3458	121	-3337	2.03499
NM_001290814	3458	140	-3318	2.04049
NM_001290814	3458	554	-2904	2.16021
NM_001290814	3458	1145	-2313	2.33112
NM_001290814	3458	1178	-2280	2.34066
NM_001290814	3458	1204	-2254	2.34818
NM_001290814	3458	1224	-2234	2.35396
NM_001290814	3458	1269	-2189	2.36698
NM_001290814	3458	1279	-2179	2.36987
NM_001290814	3458	1736	-1722	2.50202
NM_001290814	3458	1752	-1706	2.50665
NM_001290814	3458	1839	-1619	2.53181
NM_001290814	3458	2009	-1449	2.58097
NM_001290814	3458	2092	-1366	2.60497
NM_001290814	3458	2675	-783	2.77357
NM_001290814	3458	2926	-532	2.84615
NM_001290814	3458	3092	-366	2.89416
NM_001290814	3458	3190	-268	2.9225
NM_001290814	3458	3251	-207	2.94014
NM_001033135	1176	263	-913	2.22364
NM_001033135	1176	745	-431	2.6335
NM_001033135	1176	805	-371	2.68452
NM_001033135	1176	943	-233	2.80187
NM_001033135	1176	1017	-159	2.8648
NM_028696	1757	161	-1596	2.09163
NM_028696	1757	266	-1491	2.15139
NM_028696	1757	343	-1414	2.19522
NM_028696	1757	355	-1402	2.20205
NM_028696	1757	541	-1216	2.30791
NM_028696	1757	725	-1032	2.41264
NM_028696	1757	856	-901	2.48719
NM_028696	1757	1096	-661	2.62379
NM_028696	1757	1232	-525	2.7012
NM_028696	1757	1649	-108	2.93853
NM_028696	1757	1665	-92	2.94764
NM_028696	1757	1698	-59	2.96642
NM_028696	1757	1715	-42	2.9761
NM_001161817	1415	31	-1384	2.02191
NM_001161817	1415	60	-1355	2.0424
NM_001161817	1415	83	-1332	2.05866
NM_001161817	1415	108	-1307	2.07633
NM_001161817	1415	242	-1173	2.17102
NM_001161817	1415	639	-776	2.45159
NM_001161817	1415	643	-772	2.45442
NM_001161817	1415	647	-768	2.45724
NM_001161817	1415	651	-764	2.46007
NM_001161817	1415	655	-760	2.4629
NM_001161817	1415	1112	-303	2.78587
NM_001161817	1415	1153	-262	2.81484
NM_001161817	1415	1293	-122	2.91378
NM_001081081	2708	117	-2591	2.04321
NM_001081081	2708	383	-2325	2.14143
NM_001081081	2708	441	-2267	2.16285
NM_001081081	2708	474	-2234	2.17504
NM_001081081	2708	584	-2124	2.21566
NM_001081081	2708	594	-2114	2.21935
NM_001081081	2708	745	-1963	2.27511
NM_001081081	2708	1142	-1566	2.42171
NM_001081081	2708	1147	-1561	2.42356
NM_001081081	2708	1152	-1556	2.42541
NM_001081081	2708	1183	-1525	2.43685
NM_001081081	2708	1474	-1234	2.54431
NM_001081081	2708	1751	-957	2.6466
NM_001081081	2708	1857	-851	2.68575
NM_001081081	2708	2139	-569	2.78988
NM_001081081	2708	2166	-542	2.79985
NM_001081081	2708	2315	-393	2.85487
NM_001081081	2708	2319	-389	2.85635
NM_001081081	2708	2405	-303	2.88811
NM_001081081	2708	2536	-172	2.93648
NM_008667	3369	407	-2962	2.12081
NM_008667	3369	533	-2836	2.15821
NM_008667	3369	771	-2598	2.22885
NM_008667	3369	859	-2510	2.25497
NM_008667	3369	886	-2483	2.26299
NM_008667	3369	910	-2459	2.27011
NM_008667	3369	936	-2433	2.27783
NM_008667	3369	1138	-2231	2.33779
NM_008667	3369	1701	-1668	2.5049
NM_008667	3369	1819	-1550	2.53992
NM_008667	3369	2072	-1297	2.61502
NM_008667	3369	2236	-1133	2.6637
NM_008667	3369	2416	-953	2.71713
NM_008667	3369	2491	-878	2.73939
NM_008667	3369	2520	-849	2.748
NM_008667	3369	2821	-548	2.83734
NM_133810	1976	63	-1913	2.03188
NM_133810	1976	84	-1892	2.04251
NM_133810	1976	181	-1795	2.0916
NM_133810	1976	229	-1747	2.11589
NM_133810	1976	383	-1593	2.19383
NM_133810	1976	565	-1411	2.28593
NM_133810	1976	767	-1209	2.38816
NM_133810	1976	1059	-917	2.53593
NM_133810	1976	1143	-833	2.57844
NM_133810	1976	1175	-801	2.59464
NM_133810	1976	1238	-738	2.62652
NM_133810	1976	1269	-707	2.64221
NM_133810	1976	1290	-686	2.65283
NM_133810	1976	1385	-591	2.70091
NM_133810	1976	1533	-443	2.77581
NM_133810	1976	1588	-388	2.80364
NM_133810	1976	1728	-248	2.87449
NM_001163314	7706	353	-7353	2.04581
NM_001163314	7706	378	-7328	2.04905
NM_001163314	7706	416	-7290	2.05398
NM_001163314	7706	432	-7274	2.05606
NM_001163314	7706	553	-7153	2.07176
NM_001163314	7706	780	-6926	2.10122
NM_001163314	7706	830	-6876	2.10771
NM_001163314	7706	1241	-6465	2.16104
NM_001163314	7706	1318	-6388	2.17104
NM_001163314	7706	1330	-6376	2.17259
NM_001163314	7706	1397	-6309	2.18129
NM_001163314	7706	1510	-6196	2.19595
NM_001163314	7706	1590	-6116	2.20633
NM_001163314	7706	1630	-6076	2.21152
NM_001163314	7706	1876	-5830	2.24345
NM_001163314	7706	1990	-5716	2.25824
NM_001163314	7706	2234	-5472	2.2899
NM_001163314	7706	2290	-5416	2.29717
NM_001163314	7706	2352	-5354	2.30522
NM_001163314	7706	2360	-5346	2.30625
NM_001163314	7706	2798	-4908	2.36309
NM_001163314	7706	3872	-3834	2.50247
NM_001163314	7706	4224	-3482	2.54814
NM_001163314	7706	4391	-3315	2.56982
NM_001163314	7706	4399	-3307	2.57085
NM_001163314	7706	4529	-3177	2.58772
NM_001163314	7706	4680	-3026	2.60732
NM_001163314	7706	4771	-2935	2.61913
NM_001163314	7706	4803	-2903	2.62328
NM_001163314	7706	4899	-2807	2.63574
NM_001163314	7706	5176	-2530	2.67168
NM_001163314	7706	5338	-2368	2.69271
NM_001163314	7706	5372	-2334	2.69712
NM_001163314	7706	5435	-2271	2.70529
NM_001163314	7706	5556	-2150	2.721
NM_001163314	7706	5586	-2120	2.72489
NM_001163314	7706	6441	-1265	2.83584
NM_001163314	7706	6758	-948	2.87698
NM_001163314	7706	6841	-865	2.88775
NM_001163314	7706	6986	-720	2.90657
NM_001163314	7706	7000	-706	2.90838
NM_001163314	7706	7025	-681	2.91163
NM_001163314	7706	7472	-234	2.96963
NM_001163314	7706	7553	-153	2.98015
NM_001163314	7706	7641	-65	2.99157
NM_031179	2164	20	-2144	2.00924
NM_031179	2164	141	-2023	2.06516
NM_031179	2164	152	-2012	2.07024
NM_031179	2164	260	-1904	2.12015
NM_031179	2164	273	-1891	2.12616
NM_031179	2164	321	-1843	2.14834
NM_031179	2164	457	-1707	2.21118
NM_031179	2164	475	-1689	2.2195
NM_031179	2164	1076	-1088	2.49723
NM_031179	2164	1115	-1049	2.51525
NM_031179	2164	1122	-1042	2.51848
NM_031179	2164	1151	-1013	2.53189
NM_031179	2164	1178	-986	2.54436
NM_031179	2164	1302	-862	2.60166
NM_031179	2164	1506	-658	2.69593
NM_031179	2164	1638	-526	2.75693
NM_031179	2164	1815	-349	2.83872
NM_031179	2164	1934	-230	2.89372
NM_031179	2164	2065	-99	2.95425
NM_001159864	1227	20	-1207	2.0163
NM_001159864	1227	163	-1064	2.13284
NM_001159864	1227	294	-933	2.23961
NM_001159864	1227	309	-918	2.25183
NM_001159864	1227	446	-781	2.36349
NM_001159864	1227	573	-654	2.46699
NM_001159864	1227	891	-336	2.72616
NM_001159864	1227	943	-284	2.76854
NM_001159864	1227	1144	-83	2.93236
NM_001159864	1227	1219	-8	2.99348
NM_001159948	1421	368	-1053	2.25897
NM_001159948	1421	1027	-394	2.72273
NM_001159948	1421	1177	-244	2.82829
NM_001159948	1421	1188	-233	2.83603
NM_009460	766	156	-610	2.20366
NM_009460	766	487	-279	2.63577
NM_009460	766	678	-88	2.88512
NM_001160039	239	70	-169	2.29289
NM_001160039	239	226	-13	2.94561
NM_010497	849	115	-734	2.13545
NM_010497	849	146	-703	2.17197
NM_010497	849	252	-597	2.29682
NM_010497	849	281	-568	2.33098
NM_010497	849	517	-332	2.60895
NM_010497	849	807	-42	2.95053
NM_010233	739	60	-679	2.08119
NM_010233	739	174	-565	2.23545
NM_010233	739	250	-489	2.33829
NM_010233	739	509	-230	2.68877
NM_010233	739	513	-226	2.69418
NM_010233	739	665	-74	2.89986
NM_010233	739	730	-9	2.98782
NM_146110	394	30	-364	2.07614
NM_176972	3881	161	-3720	2.04148
NM_176972	3881	365	-3516	2.09405
NM_176972	3881	527	-3354	2.13579
NM_176972	3881	652	-3229	2.168
NM_176972	3881	717	-3164	2.18475
NM_176972	3881	1104	-2777	2.28446
NM_176972	3881	1278	-2603	2.3293
NM_176972	3881	1351	-2530	2.34811
NM_176972	3881	1369	-2512	2.35274
NM_176972	3881	1555	-2326	2.40067
NM_176972	3881	1622	-2259	2.41793
NM_176972	3881	1650	-2231	2.42515
NM_176972	3881	1683	-2198	2.43365
NM_176972	3881	1987	-1894	2.51198
NM_176972	3881	2242	-1639	2.57769
NM_176972	3881	2345	-1536	2.60423
NM_176972	3881	2467	-1414	2.63566
NM_176972	3881	2501	-1380	2.64442
NM_176972	3881	2555	-1326	2.65834
NM_176972	3881	2630	-1251	2.67766
NM_176972	3881	3747	-134	2.96547
NM_176972	3881	3796	-85	2.9781
NM_176972	3881	3831	-50	2.98712
NM_176972	3881	3836	-45	2.98841
NM_176972	3881	3841	-40	2.98969
NM_011811	449	82	-367	2.18263
NM_011811	449	364	-85	2.81069
NM_009255	684	83	-601	2.12135
NM_009255	684	151	-533	2.22076
NM_009255	684	400	-284	2.5848
NM_009255	684	498	-186	2.72807
NM_009255	684	615	-69	2.89912
NM_009255	684	639	-45	2.93421
NM_016716	2233	96	-2137	2.04299
NM_016716	2233	113	-2120	2.0506
NM_016716	2233	252	-1981	2.11285
NM_016716	2233	367	-1866	2.16435
NM_016716	2233	489	-1744	2.21899
NM_016716	2233	623	-1610	2.279
NM_016716	2233	786	-1447	2.35199
NM_016716	2233	930	-1303	2.41648
NM_016716	2233	1007	-1226	2.45096
NM_016716	2233	1085	-1148	2.48589
NM_016716	2233	1163	-1070	2.52082
NM_016716	2233	1341	-892	2.60054
NM_016716	2233	1395	-838	2.62472
NM_016716	2233	1482	-751	2.66368
NM_016716	2233	1621	-612	2.72593
NM_016716	2233	2014	-219	2.90193
NM_016716	2233	2110	-123	2.94492
NM_133975	3429	27	-3402	2.00787
NM_133975	3429	204	-3225	2.05949
NM_133975	3429	273	-3156	2.07962
NM_133975	3429	355	-3074	2.10353
NM_133975	3429	506	-2923	2.14756
NM_133975	3429	517	-2912	2.15077
NM_133975	3429	521	-2908	2.15194
NM_133975	3429	525	-2904	2.15311
NM_133975	3429	742	-2687	2.21639
NM_133975	3429	954	-2475	2.27822
NM_133975	3429	958	-2471	2.27938
NM_133975	3429	1074	-2355	2.31321
NM_133975	3429	1120	-2309	2.32663
NM_133975	3429	1161	-2268	2.33858
NM_133975	3429	1268	-2161	2.36979
NM_133975	3429	1646	-1783	2.48002
NM_133975	3429	1724	-1705	2.50277
NM_133975	3429	1768	-1661	2.5156
NM_133975	3429	1793	-1636	2.52289
NM_133975	3429	1828	-1601	2.5331
NM_133975	3429	1914	-1515	2.55818
NM_133975	3429	2171	-1258	2.63313
NM_133975	3429	2554	-875	2.74482
NM_133975	3429	2558	-871	2.74599
NM_133975	3429	2565	-864	2.74803
NM_133975	3429	2679	-750	2.78128
NM_133975	3429	2911	-518	2.84894
NM_133975	3429	2946	-483	2.85914
NM_133975	3429	2956	-473	2.86206
NM_133975	3429	2976	-453	2.86789
NM_133975	3429	3286	-143	2.9583
NM_010880	5901	62	-5839	2.01051
NM_010880	5901	594	-5307	2.10066
NM_010880	5901	996	-4905	2.16878
NM_010880	5901	1009	-4892	2.17099
NM_010880	5901	1016	-4885	2.17217
NM_010880	5901	1020	-4881	2.17285
NM_010880	5901	1075	-4826	2.18217
NM_010880	5901	1310	-4591	2.222
NM_010880	5901	1322	-4579	2.22403
NM_010880	5901	1605	-4296	2.27199
NM_010880	5901	3201	-2700	2.54245
NM_010880	5901	3230	-2671	2.54736
NM_010880	5901	3598	-2303	2.60973
NM_010880	5901	3645	-2256	2.61769
NM_010880	5901	3809	-2092	2.64548
NM_010880	5901	3934	-1967	2.66667
NM_010880	5901	3953	-1948	2.66989
NM_010880	5901	4072	-1829	2.69005
NM_010880	5901	4118	-1783	2.69785
NM_010880	5901	4200	-1701	2.71174
NM_010880	5901	4630	-1271	2.78461
NM_010880	5901	4662	-1239	2.79004
NM_010880	5901	4805	-1096	2.81427
NM_010880	5901	5433	-468	2.92069
NM_010880	5901	5729	-172	2.97085
NM_198652	6325	23	-6302	2.00364
NM_198652	6325	97	-6228	2.01534
NM_198652	6325	428	-5897	2.06767
NM_198652	6325	516	-5809	2.08158
NM_198652	6325	631	-5694	2.09976
NM_198652	6325	774	-5551	2.12237
NM_198652	6325	1469	-4856	2.23225
NM_198652	6325	2095	-4230	2.33123
NM_198652	6325	2147	-4178	2.33945
NM_198652	6325	2486	-3839	2.39304
NM_198652	6325	2506	-3819	2.39621
NM_198652	6325	3453	-2872	2.54593
NM_198652	6325	3505	-2820	2.55415
NM_198652	6325	3509	-2816	2.55478
NM_198652	6325	3684	-2641	2.58245
NM_198652	6325	4054	-2271	2.64095
NM_198652	6325	4098	-2227	2.64791
NM_198652	6325	4135	-2190	2.65375
NM_198652	6325	4149	-2176	2.65597
NM_198652	6325	4339	-1986	2.68601
NM_198652	6325	6000	-325	2.94862
NM_198652	6325	6019	-306	2.95162
NM_198652	6325	6204	-121	2.98087
NM_013626	716	162	-554	2.22626
NM_013626	716	619	-97	2.86453
NM_013626	716	654	-62	2.91341
NM_013626	716	702	-14	2.98045
NM_011650	2290	352	-1938	2.15371
NM_011650	2290	384	-1906	2.16769
NM_011650	2290	652	-1638	2.28472
NM_011650	2290	854	-1436	2.37293
NM_011650	2290	1305	-985	2.56987
NM_011650	2290	1577	-713	2.68865
NM_011650	2290	1600	-690	2.69869
NM_011650	2290	1773	-517	2.77424
NM_011650	2290	1837	-453	2.80218
NM_011650	2290	2268	-22	2.99039
NM_177445	527	242	-285	2.4592
NM_177445	527	484	-43	2.91841
NM_001356509	644	61	-583	2.09472
NM_001356509	644	189	-455	2.29348
NM_001356509	644	193	-451	2.29969
NM_001356509	644	197	-447	2.3059
NM_001356509	644	250	-394	2.3882
NM_001356509	644	416	-228	2.64596
NM_001356509	644	441	-203	2.68478
NM_001356509	644	461	-183	2.71584
NM_001356509	644	467	-177	2.72516
NM_001356509	644	473	-171	2.73447
NM_001356509	644	545	-99	2.84627
NM_001356509	644	549	-95	2.85248
NM_001356509	644	553	-91	2.8587
NM_001356509	644	618	-26	2.95963
NM_001081011	4106	153	-3953	2.03726
NM_001081011	4106	358	-3748	2.08719
NM_001081011	4106	386	-3720	2.09401
NM_001081011	4106	599	-3507	2.14588
NM_001081011	4106	727	-3379	2.17706
NM_001081011	4106	861	-3245	2.20969
NM_001081011	4106	928	-3178	2.22601
NM_001081011	4106	1102	-3004	2.26839
NM_001081011	4106	1176	-2930	2.28641
NM_001081011	4106	1183	-2923	2.28811
NM_001081011	4106	1237	-2869	2.30127
NM_001081011	4106	1423	-2683	2.34657
NM_001081011	4106	1459	-2647	2.35533
NM_001081011	4106	1500	-2606	2.36532
NM_001081011	4106	2064	-2042	2.50268
NM_001081011	4106	2210	-1896	2.53824
NM_001081011	4106	2381	-1725	2.57988
NM_001081011	4106	3095	-1011	2.75377
NM_001081011	4106	3783	-323	2.92133
NM_008575	5551	178	-5373	2.03207
NM_008575	5551	368	-5183	2.06629
NM_008575	5551	676	-4875	2.12178
NM_008575	5551	683	-4868	2.12304
NM_008575	5551	917	-4634	2.1652
NM_008575	5551	1019	-4532	2.18357
NM_008575	5551	1123	-4428	2.20231
NM_008575	5551	1672	-3879	2.30121
NM_008575	5551	1763	-3788	2.3176
NM_008575	5551	2529	-3022	2.45559
NM_008575	5551	2626	-2925	2.47307
NM_008575	5551	2771	-2780	2.49919
NM_008575	5551	2842	-2709	2.51198
NM_008575	5551	2888	-2663	2.52027
NM_008575	5551	3207	-2344	2.57773
NM_008575	5551	3214	-2337	2.57899
NM_008575	5551	3255	-2296	2.58638
NM_008575	5551	3263	-2288	2.58782
NM_008575	5551	3273	-2278	2.58962
NM_008575	5551	3320	-2231	2.59809
NM_008575	5551	3521	-2030	2.6343
NM_008575	5551	3751	-1800	2.67573
NM_008575	5551	3871	-1680	2.69735
NM_008575	5551	3928	-1623	2.70762
NM_008575	5551	3934	-1617	2.7087
NM_008575	5551	3944	-1607	2.7105
NM_008575	5551	3949	-1602	2.7114
NM_008575	5551	4061	-1490	2.73158
NM_008575	5551	4295	-1256	2.77373
NM_008575	5551	4457	-1094	2.80292
NM_008575	5551	4606	-945	2.82976
NM_008575	5551	5305	-246	2.95568
NM_008575	5551	5368	-183	2.96703
NM_008575	5551	5406	-145	2.97388
NM_008575	5551	5441	-110	2.98018
NM_008575	5551	5497	-54	2.99027
NM_011439	1351	368	-983	2.27239
NM_011439	1351	793	-558	2.58697
NM_011439	1351	1230	-121	2.91044
NM_011439	1351	1271	-80	2.94078
NM_011439	1351	1313	-38	2.97187
NM_001276767	1672	205	-1467	2.12261
NM_001276767	1672	327	-1345	2.19557
NM_001276767	1672	331	-1341	2.19797
NM_001276767	1672	469	-1203	2.2805
NM_001276767	1672	574	-1098	2.3433
NM_001276767	1672	1173	-499	2.70156
NM_001276767	1672	1481	-191	2.88577
NM_001276767	1672	1650	-22	2.98684
NM_001166552	776	66	-710	2.08505
NM_001166552	776	206	-570	2.26546
NM_001166552	776	392	-384	2.50515
NM_001166552	776	555	-221	2.71521
NM_001166552	776	566	-210	2.72938
NM_001166552	776	602	-174	2.77577
NM_001166552	776	661	-115	2.8518
NM_213616	4017	390	-3627	2.09709
NM_213616	4017	997	-3020	2.2482
NM_213616	4017	1483	-2534	2.36918
NM_213616	4017	2156	-1861	2.53672
NM_213616	4017	2217	-1800	2.5519
NM_213616	4017	2243	-1774	2.55838
NM_213616	4017	2386	-1631	2.59398
NM_213616	4017	2400	-1617	2.59746
NM_213616	4017	2410	-1607	2.59995
NM_213616	4017	2698	-1319	2.67165
NM_213616	4017	3706	-311	2.92258
NM_213616	4017	3816	-201	2.94996
NM_213616	4017	3886	-131	2.96739
NM_001347110	2719	155	-2564	2.05701
NM_001347110	2719	259	-2460	2.09526
NM_001347110	2719	444	-2275	2.1633
NM_001347110	2719	448	-2271	2.16477
NM_001347110	2719	566	-2153	2.20816
NM_001347110	2719	656	-2063	2.24127
NM_001347110	2719	1005	-1714	2.36962
NM_001347110	2719	1190	-1529	2.43766
NM_001347110	2719	1234	-1485	2.45384
NM_001347110	2719	1257	-1462	2.4623
NM_001347110	2719	1310	-1409	2.48179
NM_001347110	2719	1336	-1383	2.49136
NM_001347110	2719	1499	-1220	2.55131
NM_001347110	2719	2131	-588	2.78374
NM_001347110	2719	2348	-371	2.86355
NM_001347110	2719	2364	-355	2.86944
NM_001347110	2719	2595	-124	2.95439
NM_021605	3163	45	-3118	2.01423
NM_021605	3163	84	-3079	2.02656
NM_021605	3163	247	-2916	2.07809
NM_021605	3163	273	-2890	2.08631
NM_021605	3163	369	-2794	2.11666
NM_021605	3163	452	-2711	2.1429
NM_021605	3163	614	-2549	2.19412
NM_021605	3163	648	-2515	2.20487
NM_021605	3163	695	-2468	2.21973
NM_021605	3163	717	-2446	2.22668
NM_021605	3163	740	-2423	2.23396
NM_021605	3163	860	-2303	2.27189
NM_021605	3163	959	-2204	2.30319
NM_021605	3163	1048	-2115	2.33133
NM_021605	3163	1072	-2091	2.33892
NM_021605	3163	1082	-2081	2.34208
NM_021605	3163	1102	-2061	2.3484
NM_021605	3163	1131	-2032	2.35757
NM_021605	3163	1653	-1510	2.52261
NM_021605	3163	1659	-1504	2.5245
NM_021605	3163	1665	-1498	2.5264
NM_021605	3163	1772	-1391	2.56023
NM_021605	3163	1834	-1329	2.57983
NM_021605	3163	2235	-928	2.70661
NM_021605	3163	2311	-852	2.73064
NM_021605	3163	2659	-504	2.84066
NM_021605	3163	2674	-489	2.8454
NM_021605	3163	2700	-463	2.85362
NM_021605	3163	2788	-375	2.88144
NM_021605	3163	2821	-342	2.89187
NM_145991	5245	140	-5105	2.02669
NM_145991	5245	537	-4708	2.10238
NM_145991	5245	703	-4542	2.13403
NM_145991	5245	1213	-4032	2.23127
NM_145991	5245	1239	-4006	2.23622
NM_145991	5245	1529	-3716	2.29152
NM_145991	5245	1628	-3617	2.31039
NM_145991	5245	1742	-3503	2.33213
NM_145991	5245	1793	-3452	2.34185
NM_145991	5245	1956	-3289	2.37293
NM_145991	5245	2006	-3239	2.38246
NM_145991	5245	2133	-3112	2.40667
NM_145991	5245	2233	-3012	2.42574
NM_145991	5245	2511	-2734	2.47874
NM_145991	5245	2625	-2620	2.50048
NM_145991	5245	2698	-2547	2.51439
NM_145991	5245	2845	-2400	2.54242
NM_145991	5245	2878	-2367	2.54871
NM_145991	5245	2904	-2341	2.55367
NM_145991	5245	3030	-2215	2.57769
NM_145991	5245	3088	-2157	2.58875
NM_145991	5245	3095	-2150	2.59009
NM_145991	5245	3514	-1731	2.66997
NM_145991	5245	3526	-1719	2.67226
NM_145991	5245	3820	-1425	2.72831
NM_145991	5245	3913	-1332	2.74604
NM_145991	5245	4038	-1207	2.76988
NM_145991	5245	4186	-1059	2.79809
NM_145991	5245	4202	-1043	2.80114
NM_145991	5245	4373	-872	2.83375
NM_145991	5245	4383	-862	2.83565
NM_145991	5245	4509	-736	2.85968
NM_145991	5245	4557	-688	2.86883
NM_145991	5245	4887	-358	2.93174
NM_145991	5245	5013	-232	2.95577
NM_145991	5245	5213	-32	2.9939
NM_001110146	572	368	-204	2.64336
NM_025819	760	612	-148	2.80526
NM_025819	760	651	-109	2.85658
NM_025819	760	676	-84	2.88947
NM_025819	760	716	-44	2.94211
NM_011277	1918	70	-1848	2.0365
NM_011277	1918	125	-1793	2.06517
NM_011277	1918	505	-1413	2.2633
NM_011277	1918	527	-1391	2.27477
NM_011277	1918	714	-1204	2.37226
NM_011277	1918	719	-1199	2.37487
NM_011277	1918	732	-1186	2.38165
NM_011277	1918	898	-1020	2.4682
NM_011277	1918	1057	-861	2.55109
NM_011277	1918	1092	-826	2.56934
NM_011277	1918	1368	-550	2.71324
NM_011277	1918	1575	-343	2.82117
NM_011277	1918	1669	-249	2.87018
NM_011277	1918	1716	-202	2.89468
NM_011277	1918	1864	-54	2.97185
NM_001005507	2277	103	-2174	2.04523
NM_001005507	2277	240	-2037	2.1054
NM_001005507	2277	607	-1670	2.26658
NM_001005507	2277	989	-1288	2.43434
NM_001005507	2277	1325	-952	2.58191
NM_001005507	2277	1711	-566	2.75143
NM_001005507	2277	1719	-558	2.75494
NM_001005507	2277	1727	-550	2.75845
NM_001005507	2277	1732	-545	2.76065
NM_001005507	2277	1753	-524	2.76987
NM_001005507	2277	1758	-519	2.77207
NM_001005507	2277	1763	-514	2.77426
NM_001005507	2277	2043	-234	2.89723
NM_001005507	2277	2052	-225	2.90119
NM_001005507	2277	2159	-118	2.94818
NM_001005507	2277	2164	-113	2.95037
NM_001005507	2277	2190	-87	2.96179
NM_007842	311	52	-259	2.1672
NM_007842	311	65	-246	2.209
NM_007842	311	154	-157	2.49518
NM_007842	311	185	-126	2.59486
NM_001134741	278	51	-227	2.18345
NM_001134741	278	96	-182	2.34532
NM_001134741	278	154	-124	2.55396
NM_001134741	278	190	-88	2.68345
NM_001134741	278	200	-78	2.71942
NM_001134741	278	208	-70	2.7482
NM_001134741	278	212	-66	2.76259
NM_001134741	278	218	-60	2.78417
NM_001134741	278	224	-54	2.80576
NM_001134741	278	231	-47	2.83094
NM_009230	2951	101	-2850	2.03423
NM_009230	2951	174	-2777	2.05896
NM_009230	2951	179	-2772	2.06066
NM_009230	2951	184	-2767	2.06235
NM_009230	2951	279	-2672	2.09454
NM_009230	2951	441	-2510	2.14944
NM_009230	2951	490	-2461	2.16605
NM_009230	2951	637	-2314	2.21586
NM_009230	2951	642	-2309	2.21755
NM_009230	2951	806	-2145	2.27313
NM_009230	2951	1111	-1840	2.37648
NM_009230	2951	1663	-1288	2.56354
NM_009230	2951	1755	-1196	2.59471
NM_009230	2951	1760	-1191	2.59641
NM_009230	2951	1765	-1186	2.5981
NM_009230	2951	1770	-1181	2.5998
NM_009230	2951	1778	-1173	2.60251
NM_009230	2951	2600	-351	2.88106
NM_009230	2951	2607	-344	2.88343
NM_009230	2951	2643	-308	2.89563
NM_009230	2951	2693	-258	2.91257
NM_145413	2840	142	-2698	2.05
NM_145413	2840	268	-2572	2.09437
NM_145413	2840	457	-2383	2.16092
NM_145413	2840	613	-2227	2.21585
NM_145413	2840	1296	-1544	2.45634
NM_145413	2840	1663	-1177	2.58556
NM_145413	2840	1731	-1109	2.60951
NM_145413	2840	1999	-841	2.70387
NM_145413	2840	2114	-726	2.74437
NM_145413	2840	2747	-93	2.96725
NM_001159967	4998	432	-4566	2.08643
NM_001159967	4998	842	-4156	2.16847
NM_001159967	4998	869	-4129	2.17387
NM_001159967	4998	910	-4088	2.18207
NM_001159967	4998	944	-4054	2.18888
NM_001159967	4998	1129	-3869	2.22589
NM_001159967	4998	1133	-3865	2.22669
NM_001159967	4998	1502	-3496	2.30052
NM_001159967	4998	1758	-3240	2.35174
NM_001159967	4998	1776	-3222	2.35534
NM_001159967	4998	1797	-3201	2.35954
NM_001159967	4998	2165	-2833	2.43317
NM_001159967	4998	2275	-2723	2.45518
NM_001159967	4998	2343	-2655	2.46879
NM_001159967	4998	2508	-2490	2.5018
NM_001159967	4998	2646	-2352	2.52941
NM_001159967	4998	2708	-2290	2.54182
NM_001159967	4998	2884	-2114	2.57703
NM_001159967	4998	3112	-1886	2.62265
NM_001159967	4998	3708	-1290	2.7419
NM_001159967	4998	3993	-1005	2.79892
NM_001159967	4998	4174	-824	2.83513
NM_001159967	4998	4326	-672	2.86555
NM_001159967	4998	4625	-373	2.92537
NM_001159967	4998	4636	-362	2.92757
NM_001159967	4998	4878	-120	2.97599
NM_001159967	4998	4921	-77	2.98459
NM_009786	1200	199	-1001	2.16583
NM_009786	1200	294	-906	2.245
NM_009786	1200	341	-859	2.28417
NM_009786	1200	453	-747	2.3775
NM_009786	1200	664	-536	2.55333
NM_009786	1200	748	-452	2.62333
NM_173424	2165	249	-1916	2.11501
NM_173424	2165	272	-1893	2.12564
NM_173424	2165	491	-1674	2.22679
NM_173424	2165	553	-1612	2.25543
NM_173424	2165	588	-1577	2.27159
NM_173424	2165	795	-1370	2.36721
NM_173424	2165	802	-1363	2.37044
NM_173424	2165	838	-1327	2.38707
NM_173424	2165	849	-1316	2.39215
NM_173424	2165	873	-1292	2.40323
NM_173424	2165	1048	-1117	2.48406
NM_173424	2165	1116	-1049	2.51547
NM_173424	2165	1236	-929	2.5709
NM_173424	2165	1248	-917	2.57644
NM_173424	2165	2087	-78	2.96397
NM_172645	2254	236	-2018	2.1047
NM_172645	2254	423	-1831	2.18767
NM_172645	2254	959	-1295	2.42547
NM_172645	2254	1024	-1230	2.4543
NM_172645	2254	1032	-1222	2.45785
NM_172645	2254	1037	-1217	2.46007
NM_172645	2254	1127	-1127	2.5
NM_172645	2254	1193	-1061	2.52928
NM_172645	2254	1203	-1051	2.53372
NM_172645	2254	1237	-1017	2.5488
NM_172645	2254	1268	-986	2.56256
NM_172645	2254	1298	-956	2.57587
NM_172645	2254	1594	-660	2.70719
NM_172645	2254	1613	-641	2.71562
NM_172645	2254	1633	-621	2.72449
NM_172645	2254	1638	-616	2.72671
NM_172645	2254	1937	-317	2.85936
NM_172645	2254	2128	-126	2.9441
NM_172645	2254	2211	-43	2.98092
NM_001001880	1472	296	-1176	2.20109
NM_001001880	1472	1348	-124	2.91576
NM_001001880	1472	1429	-43	2.97079
NM_198933	10584	415	-10169	2.03921
NM_198933	10584	421	-10163	2.03978
NM_198933	10584	514	-10070	2.04856
NM_198933	10584	599	-9985	2.05659
NM_198933	10584	603	-9981	2.05697
NM_198933	10584	652	-9932	2.0616
NM_198933	10584	676	-9908	2.06387
NM_198933	10584	1145	-9439	2.10818
NM_198933	10584	1151	-9433	2.10875
NM_198933	10584	1155	-9429	2.10913
NM_198933	10584	1159	-9425	2.1095
NM_198933	10584	1167	-9417	2.11026
NM_198933	10584	1171	-9413	2.11064
NM_198933	10584	1270	-9314	2.11999
NM_198933	10584	1296	-9288	2.12245
NM_198933	10584	1622	-8962	2.15325
NM_198933	10584	1926	-8658	2.18197
NM_198933	10584	1992	-8592	2.18821
NM_198933	10584	2213	-8371	2.20909
NM_198933	10584	2218	-8366	2.20956
NM_198933	10584	2222	-8362	2.20994
NM_198933	10584	2227	-8357	2.21041
NM_198933	10584	2232	-8352	2.21088
NM_198933	10584	2391	-8193	2.22591
NM_198933	10584	2460	-8124	2.23243
NM_198933	10584	2532	-8052	2.23923
NM_198933	10584	2543	-8041	2.24027
NM_198933	10584	2604	-7980	2.24603
NM_198933	10584	2788	-7796	2.26342
NM_198933	10584	2874	-7710	2.27154
NM_198933	10584	3046	-7538	2.28779
NM_198933	10584	3381	-7203	2.31944
NM_198933	10584	3390	-7194	2.32029
NM_198933	10584	3554	-7030	2.33579
NM_198933	10584	3564	-7020	2.33673
NM_198933	10584	3687	-6897	2.34836
NM_198933	10584	3809	-6775	2.35988
NM_198933	10584	3865	-6719	2.36517
NM_198933	10584	3896	-6688	2.3681
NM_198933	10584	3968	-6616	2.37491
NM_198933	10584	4168	-6416	2.3938
NM_198933	10584	4615	-5969	2.43604
NM_198933	10584	4660	-5924	2.44029
NM_198933	10584	5251	-5333	2.49613
NM_198933	10584	5351	-5233	2.50557
NM_198933	10584	5364	-5220	2.5068
NM_198933	10584	5401	-5183	2.5103
NM_198933	10584	5451	-5133	2.51502
NM_198933	10584	5482	-5102	2.51795
NM_198933	10584	5869	-4715	2.55452
NM_198933	10584	6655	-3929	2.62878
NM_198933	10584	6673	-3911	2.63048
NM_198933	10584	6798	-3786	2.64229
NM_198933	10584	6826	-3758	2.64494
NM_198933	10584	7303	-3281	2.69
NM_198933	10584	7467	-3117	2.7055
NM_198933	10584	8014	-2570	2.75718
NM_198933	10584	8274	-2310	2.78175
NM_198933	10584	8534	-2050	2.80631
NM_198933	10584	8539	-2045	2.80678
NM_198933	10584	9086	-1498	2.85847
NM_198933	10584	9134	-1450	2.863
NM_198933	10584	9146	-1438	2.86413
NM_198933	10584	9359	-1225	2.88426
NM_198933	10584	9538	-1046	2.90117
NM_198933	10584	9542	-1042	2.90155
NM_198933	10584	9628	-956	2.90967
NM_198933	10584	9807	-777	2.92659
NM_198933	10584	9820	-764	2.92782
NM_198933	10584	9858	-726	2.93141
NM_198933	10584	9897	-687	2.93509
NM_198933	10584	9959	-625	2.94095
NM_198933	10584	10242	-342	2.96769
NM_198933	10584	10266	-318	2.96995
NM_010476	3496	403	-3093	2.11527
NM_010476	3496	539	-2957	2.15418
NM_010476	3496	666	-2830	2.1905
NM_010476	3496	1120	-2376	2.32037
NM_010476	3496	1328	-2168	2.37986
NM_010476	3496	1562	-1934	2.4468
NM_010476	3496	1644	-1852	2.47025
NM_010476	3496	1707	-1789	2.48827
NM_010476	3496	1724	-1772	2.49314
NM_010476	3496	2346	-1150	2.67105
NM_010476	3496	2509	-987	2.71768
NM_010476	3496	2571	-925	2.73541
NM_010476	3496	2632	-864	2.75286
NM_010476	3496	2879	-617	2.82351
NM_010476	3496	2895	-601	2.82809
NM_010476	3496	3221	-275	2.92134
NM_010476	3496	3330	-166	2.95252
NM_010476	3496	3382	-114	2.96739
NM_010476	3496	3403	-93	2.9734
NM_025321	644	53	-591	2.0823
NM_025321	644	105	-539	2.16304
NM_025321	644	539	-105	2.83696
NM_021607	661	184	-477	2.27837
NM_021607	661	489	-172	2.73979
NM_021607	661	506	-155	2.76551
NM_021350	4250	306	-3944	2.072
NM_021350	4250	389	-3861	2.09153
NM_021350	4250	423	-3827	2.09953
NM_021350	4250	1239	-3011	2.29153
NM_021350	4250	1436	-2814	2.33788
NM_021350	4250	1739	-2511	2.40918
NM_021350	4250	1743	-2507	2.41012
NM_021350	4250	1747	-2503	2.41106
NM_021350	4250	1751	-2499	2.412
NM_021350	4250	1755	-2495	2.41294
NM_021350	4250	1759	-2491	2.41388
NM_021350	4250	1763	-2487	2.41482
NM_021350	4250	1767	-2483	2.41576
NM_021350	4250	1925	-2325	2.45294
NM_021350	4250	2205	-2045	2.51882
NM_021350	4250	2605	-1645	2.61294
NM_021350	4250	3234	-1016	2.76094
[truncated: 25,069 more rows]
