# Supplementary material for: DAZL mediates a broad translational program regulating expansion and differentiation of spermatogonial progenitors
Source: eLife journal article supplement (doi:10.7554/elife.56523), 2020-07-20
Supplement: supp [file elife-56523-supp-v1.zip › elife_poa_e56523_Figure_5_source_data_1.xlsx]

## Sheet: Description
Figure 5 - source data 1
Tab Name	Description
Sample metadata	Sample variables. "Ribotag.specific", "Ribotag.nonspecific", and "germ.cell.specific" were incorporated into the DESeq2 model for the calculation of translational efficiency.
TE - DESeq output	Translational efficiciency (TE) calculated via DESeq, DESeq normalized counts from Ribotag samples (labeled as "MM291") and 3S undiff gonia samples (labeled as "MM257"), and mean TPM from 3S undiff gonia samples ("MM257_mean.gene.TPM"). Input and IP samples are labeled accordingly. RiboTag-positive and RiboTag-negative samples are labeled as "Ribotag" and "control", respectively.
TE, covariates, and adj TE	Translational efficiencies (TE) in undifferentiated spermatogonia; variables that correlate with translation - transcript abundance (TPM), CDS length, 3' UTR length, and Codon Adaptation Index (CAI); and adjusted translational efficiency (adj TE) calculated by subtracting the effects of these variables using a multiple log-linear regression model. Transcript ID indicates the isoform that was used…
Nontargets, TPM-matched	Subset of nontargets sampled to match DAZL targets in TPM (Kolmogorov-Smirnov test, P = 0.27 ). Translational efficiency of these nontargets were compared to DAZL targets in Figure 5D. Transcript ID indicates the isoform that was used for CDS length, 3' UTR length, and codon usage.
Nontargets, CDS length-matched	Subset of nontargets sampled to match DAZL targets in CDS length (Kolmogorov-Smirnov test, P = 1). Translational efficiency of these nontargets were compared to DAZL targets in Figure 5D. Transcript ID indicates the isoform that was used for CDS length, 3' UTR length, and codon usage.

## Sheet: Sample metadata
Sample.name	Tissue.type	Tissue.id	Genotype	IP.type	Ribotag.specific	Ribotag.nonspecific	germ.cell.specific
MM291.1.Ribotag.input	Unsorted undifferentiated spermatogonia	1	Rpl22HA/+; Ddx4Cre/+	RiboTag input	0	0	0
MM291.1.Ribotag.IP	Unsorted undifferentiated spermatogonia	1	Rpl22HA/+; Ddx4Cre/+	RiboTag IP	1	1	1
MM291.3.control.input	Unsorted undifferentiated spermatogonia	2	Rpl22HA/+; Ddx4+/+	RiboTag-negative control input	0	0	0
MM291.3.control.IP	Unsorted undifferentiated spermatogonia	2	Rpl22HA/+; Ddx4+/+	RiboTag-negative control IP	0	1	0
MM291.4.Ribotag.input	Unsorted undifferentiated spermatogonia	3	Rpl22HA/+; Ddx4Cre/+	RiboTag input	0	0	0
MM291.4.Ribotag.IP	Unsorted undifferentiated spermatogonia	3	Rpl22HA/+; Ddx4Cre/+	RiboTag IP	1	1	1
MM291.6.control.input	Unsorted undifferentiated spermatogonia	4	Rpl22HA/+; Ddx4+/+	RiboTag-negative control input	0	0	0
MM291.6.control.IP	Unsorted undifferentiated spermatogonia	4	Rpl22HA/+; Ddx4+/+	RiboTag-negative control IP	0	1	0
MM291.7.Ribotag.input	Unsorted undifferentiated spermatogonia	5	Rpl22HA/+; Ddx4Cre/+	RiboTag input	0	0	0
MM291.7.Ribotag.IP	Unsorted undifferentiated spermatogonia	5	Rpl22HA/+; Ddx4Cre/+	RiboTag IP	1	1	1
MM291.9.control.input	Unsorted undifferentiated spermatogonia	6	Rpl22HA/+; Ddx4+/+	RiboTag-negative control input	0	0	0
MM291.9.control.IP	Unsorted undifferentiated spermatogonia	6	Rpl22HA/+; Ddx4+/+	RiboTag-negative control IP	0	1	0
MM257.1b_3S	3S undifferentiated spermatogonia	7	ROSA26tdTomato/+; Ddx4Cre/+	n/a	0	0	1
MM257.1a_3S	3S undifferentiated spermatogonia	8	ROSA26tdTomato/+; Ddx4Cre/+	n/a	0	0	1

## Sheet: TE - DESeq output
gene.id	baseMean	log2TE	lfcSE	stat	pvalue	padj	MM291.1.Ribotag.input	MM291.1.Ribotag.IP	MM291.3.control.input	MM291.3.control.IP	MM291.4.Ribotag.input	MM291.4.Ribotag.IP	MM291.6.control.input	MM291.6.control.IP	MM291.7.Ribotag.input	MM291.7.Ribotag.IP	MM291.9.control.input	MM291.9.control.IP	MM257.1b_3S	MM257.1a_3S	Dazl_target	MM257_mean.gene.TPM
Zfp85	46.381	0.969818	0.551865	1.75735	0.0788585	0.131985	37.8136	32.1243	59.919	67.3519	60.0599	63.2097	47.7562	28.9606	72.8942	44.6375	47.0649	24.2147	31.6883	31.6398	Nontarget	12.4494
Scap	291.386	-3.8178	0.372649	-10.245	1.24597e-24	2.46893e-23	173.361	201.006	174.431	551.851	89.7281	128.251	131.636	623.97	112.706	178.55	116.486	370.485	575.049	651.899	Nontarget	83.4828
Zfp458	10.7661	1.14678	1.17788	0.973599	0.330256	0.435371	8.14446	13.7675	15.9784	15.2085	11.5778	10.0769	5.51033	0	12.3359	6.94361	27.6507	0	13.9801	9.55164	Nontarget	2.68126
A2ml1	16.6531	0.284539	0.706444	0.402776	0.687113	0.765071	10.4714	28.4529	6.65766	6.51793	7.23613	32.0629	14.6942	5.26557	8.41086	35.71	5.88312	12.1073	29.8243	29.8489	Nontarget	4.09915
Zfp941	39.5975	-1.72089	0.560138	-3.07226	0.00212444	0.00521672	40.1406	36.7134	39.946	60.834	27.4973	29.3146	24.4904	44.7573	37.5685	13.8872	35.887	19.3718	78.2887	65.6675	Nontarget	12.7582
BC031181	81.0094	-0.323029	0.354748	-0.910586	0.362513	0.469359	75.0454	71.5912	121.169	73.8698	78.8739	76.9509	82.0427	89.5146	72.3334	50.5891	87.0701	77.487	98.7929	78.801	Nontarget	76.3235
Zfp738	168.423	0.0131323	0.310652	0.0422733	0.966281	0.977796	152.418	166.128	163.779	121.668	141.105	261.083	122.452	184.295	145.228	180.534	167.669	181.61	208.77	161.184	Nontarget	33.0572
Slc35d2	46.9561	-4.95776	0.644915	-7.68746	1.50081e-14	1.36351e-13	26.7604	16.521	27.9622	119.495	15.9195	5.49649	26.3271	55.2884	26.354	4.95972	30.0039	181.61	63.3766	57.3098	Nontarget	19.809
Hexdc	31.9722	-2.45415	0.550489	-4.45812	8.26814e-06	3.00438e-05	38.3953	15.6032	18.6415	45.6255	31.1154	10.993	37.9601	71.0851	20.7468	6.94361	28.239	60.5367	28.8923	32.8338	Nontarget	10.0754
Tpm4	433.27	0.854364	0.373127	2.28974	0.0220364	0.0432613	646.903	44.0561	645.793	386.73	754.005	77.867	870.633	547.619	563.528	47.6133	829.52	559.359	58.7166	33.4307	Nontarget	15.5343
Lca5l	57.9173	1.38821	0.411501	3.37354	0.00074209	0.00199152	54.6842	81.6874	59.919	56.4887	55.7182	77.867	50.8175	60.554	72.8942	96.2185	36.4753	38.7435	33.5523	35.2217	Nontarget	6.82241
Wdr83os	34.2064	-0.235022	0.508448	-0.462234	0.643914	0.730392	23.8516	45.8918	22.6361	45.6255	42.6932	22.902	33.062	39.4917	37.5685	28.7664	38.2403	33.9006	32.6203	31.6398	Nontarget	50.8739
Chpf	46.3564	-1.40306	0.440107	-3.18799	0.00143264	0.00363571	46.5398	32.1243	39.946	89.0783	37.6279	30.2307	26.9394	97.413	44.2972	22.8147	25.2974	99.2802	25.1642	32.2368	Nontarget	5.64319
Sohlh1	185.65	1.36166	0.309668	4.39717	1.0967e-05	3.91858e-05	44.7945	450.657	53.2613	28.2443	58.6127	523.999	57.5524	31.5934	67.8476	488.036	61.1844	33.9006	336.455	362.962	Nontarget	199.616
Nsd3	599.473	0.5418	0.207012	2.61724	0.00886427	0.0191241	674.245	452.493	639.136	577.923	757.623	492.852	703.486	921.474	693.055	509.859	687.148	629.582	343.911	309.831	Nontarget	51.4638
Zfp950	120.284	-3.81046	0.487795	-7.8116	5.64673e-15	5.33855e-14	109.95	38.5491	91.8757	328.069	84.6628	41.2237	61.2259	134.272	100.93	16.863	92.3649	230.04	204.11	149.841	Nontarget	35.0937
Zfp239	30.5064	0.243189	0.526766	0.461665	0.644322	0.730771	27.9239	38.5491	38.6144	26.0717	28.9445	29.3146	35.511	2.63278	26.354	23.8066	34.7104	24.2147	45.6684	44.7733	Nontarget	10.0965
Ephx4	5.51876	-5.31649	1.33006	-3.99717	6.41029e-05	0.000205423	0	8.26052	0	6.51793	0	3.66433	0	18.4295	1.12145	4.95972	1.17662	19.3718	8.38808	5.3728	Nontarget	4.86286
2510009E07Rik	129.855	0.68998	0.386479	1.7853	0.0742129	0.125337	147.764	25.6994	190.409	160.776	213.466	21.986	208.78	179.029	205.786	29.7583	221.205	174.346	27.0283	11.9396	Nontarget	2.60989
Nckap5l	290.211	0.964001	0.27419	3.51581	0.000438417	0.00122947	304.254	309.311	262.312	169.466	297.405	393.915	306.13	331.731	318.491	370.987	301.804	268.783	183.606	244.761	Nontarget	23.3167
H2-K1	37.7013	-2.23466	0.74935	-2.98213	0.00286254	0.00685437	40.7223	8.26052	27.9622	126.013	22.432	7.32866	16.531	152.701	32.522	7.93555	16.4727	50.8509	12.1161	5.96978	Nontarget	3.84967
Eea1	536.216	0.925768	0.249922	3.70422	0.000212039	0.00062979	691.116	265.255	648.456	480.154	831.432	405.824	698.588	489.698	764.267	443.399	770.1	380.171	329.931	308.637	Nontarget	29.6469
Pi4ka	661.16	1.20673	0.306351	3.93904	8.18085e-05	0.000257714	503.793	841.655	504.651	204.228	492.057	1473.06	442.663	389.652	479.98	1388.72	463.001	261.519	868.632	942.628	Nontarget	84.8493
Kdm2a	1203.2	1.15794	0.132604	8.7323	2.49548e-18	3.12426e-17	1234.47	1427.23	1260.96	860.366	1266.32	1604.98	1204.31	1103.14	1249.29	1675.39	1236.63	862.043	945.057	914.57	Nontarget	81.3489
Nat8l	25.132	-2.36792	0.545038	-4.34451	1.39588e-05	4.91756e-05	8.14446	33.9599	7.9892	15.2085	8.68336	29.3146	5.51033	31.5934	5.60724	45.6294	10.0013	19.3718	63.3766	67.4585	Nontarget	5.91702
2610507B11Rik	1983.77	-1.49918	0.222432	-6.73998	1.58409e-11	1.07334e-10	1628.89	1814.56	1543.25	2859.2	1369.08	1732.31	1340.85	2859.2	1516.2	1920.4	1383.12	1745.88	3133.41	2926.38	Nontarget	239.469
Panx2	14.6161	-2.05939	1.07719	-1.9118	0.0559014	0.0982035	5.23572	17.4389	2.66307	6.51793	2.89445	12.8251	11.0207	42.1245	13.4574	13.8872	13.5312	4.84294	22.3682	35.8187	Nontarget	5.33266
Zfp948	59.5754	-0.184601	0.490837	-0.376095	0.706846	0.781413	37.8136	69.7555	65.2451	23.8991	54.271	58.6292	71.6343	84.2491	61.1189	58.5247	45.8883	38.7435	86.6768	77.6071	Nontarget	23.0083
Rpl17	542.356	-2.47234	1.11443	-2.21849	0.0265216	0.0510181	41.304	617.704	327.557	593.131	319.114	1013.19	365.519	544.986	128.406	314.446	71.1857	1627.23	862.108	767.116	Nontarget	1171.69
Tmem158	8.72588	-0.61171	0.927573	-0.659473	0.509592	0.612268	8.14446	16.521	2.66307	8.69057	4.34168	12.8251	4.89807	2.63278	8.97159	4.95972	7.05974	9.68588	15.8441	14.9244	Nontarget	6.62567
Nlrp14	14.0547	0.397066	0.880932	0.450733	0.652182	0.736478	4.65398	22.9459	6.65766	13.0359	7.95975	33.895	4.28582	0	4.48579	44.6375	3.52987	2.42147	27.9603	20.2972	Nontarget	5.24764
AI413582	11.752	-4.3168	0.978452	-4.41186	1.02484e-05	3.67786e-05	1.74524	9.17836	10.6523	17.3811	1.44723	7.32866	1.83678	15.7967	1.68217	5.95166	6.47143	9.68588	41.9404	33.4307	Nontarget	68.6966
Nup85	188.115	1.43154	0.255966	5.5927	2.23563e-08	1.0973e-07	90.1708	390.998	90.5442	41.2802	105.648	439.719	88.7776	39.4917	93.6409	449.35	106.484	62.9582	318.747	315.801	Nontarget	100.737
Zfp457	67.8992	-5.02628	1.06554	-4.71713	2.39193e-06	9.27259e-06	70.9731	16.521	38.6144	171.639	57.1655	0	34.8988	157.967	58.876	0	108.838	65.3797	103.453	66.2645	Nontarget	33.0372
Krt87	5.52827	3.65614	1.49699	2.44233	0.0145929	0.0298694	5.23572	14.6854	1.33153	0	2.17084	13.7412	2.44904	0	2.80362	18.8469	1.17662	0	8.38808	6.56675	Nontarget	2.85332
Ttc41	18.9452	-1.06929	0.59628	-1.79327	0.0729291	0.123423	14.5437	20.1924	21.3045	13.0359	10.1306	17.4056	12.2452	31.5934	17.9432	15.8711	17.061	12.1073	30.7563	31.0428	Nontarget	5.69915
Mars	726.76	2.59754	0.211238	12.2967	9.43099e-35	3.5024e-33	347.303	1668.63	376.824	110.805	315.495	2100.58	308.579	107.944	336.435	2185.25	300.039	123.495	912.437	980.834	Nontarget	205.287
Zc4h2	33.0715	1.5001	0.525296	2.85571	0.00429402	0.0099249	36.6501	34.8778	37.2829	17.3811	54.271	27.4825	50.8175	18.4295	53.2688	20.8308	38.2403	36.322	18.6402	18.5063	Nontarget	6.39
Brsk1	26.073	-1.21979	0.674411	-1.80868	0.0705012	0.11983	12.2167	27.5351	11.9838	8.69057	26.0501	27.4825	20.2046	44.7573	12.8967	38.6858	14.7078	48.4294	39.1444	32.2368	Nontarget	7.42822
Cyp4x1	544.692	-3.50225	1.33305	-2.62725	0.00860787	0.0186196	635.268	176.224	410.112	1816.33	293.063	8.24474	208.168	939.904	642.029	6.94361	420.643	1639.33	218.09	211.33	Nontarget	34.3153
Tmem259	125.671	-4.60478	0.392609	-11.7287	9.08665e-32	2.82798e-30	77.3724	49.5631	78.5604	356.313	72.3613	23.8181	55.1033	300.137	55.5117	35.71	55.3013	191.296	205.974	202.375	Nontarget	65.4749
Rab11fip5	144.489	1.1226	0.319484	3.51378	0.000441773	0.00123762	139.619	98.2084	157.121	141.222	166.431	123.671	145.718	273.809	162.049	137.88	158.844	239.725	39.1444	39.4005	Nontarget	3.67836
Ppp3r2	4.89264	-2.19111	1.49664	-1.46401	0.14319	0.219739	1.16349	3.67134	6.65766	2.17264	0	6.41257	4.89807	15.7967	1.68217	5.95166	0.588312	2.42147	9.32009	7.76071	Nontarget	2.04162
Crtc1	189.259	-0.881404	0.235731	-3.73902	0.000184737	0.000553474	131.475	179.896	182.42	232.473	131.698	187.797	128.574	308.036	151.956	220.211	145.901	259.097	181.742	208.345	Nontarget	19.4018
Zfp386	196.387	0.274068	0.370902	0.738923	0.459954	0.566323	205.938	192.746	237.013	210.746	240.963	206.118	217.352	68.4524	198.496	160.695	195.908	208.246	203.178	203.569	Nontarget	32.2958
Zfp619	22.2559	-1.27206	0.630291	-2.01821	0.0435698	0.0789166	25.0151	11.014	22.6361	47.7981	26.7737	12.8251	19.5923	23.695	24.6719	2.97583	34.1221	26.6362	17.7082	16.1184	Nontarget	2.03891
Git1	510.49	1.83398	0.222545	8.24093	1.70875e-16	1.84568e-15	415.367	807.696	501.988	258.544	450.088	766.761	472.664	368.59	504.091	1076.26	462.413	348.692	342.979	370.723	Nontarget	57.5816
Rragb	128.954	1.5614	0.323544	4.82594	1.39344e-06	5.55159e-06	215.246	67.9199	185.083	139.049	188.14	58.6292	181.229	89.5146	252.887	68.4441	180.612	96.8588	44.7364	37.0126	Nontarget	13.2943
Gnptab	267.071	-2.22783	0.320772	-6.94519	3.77939e-12	2.71912e-11	293.782	179.896	235.681	491.017	172.22	137.412	153.065	368.59	191.207	170.614	202.968	372.906	383.988	385.647	Nontarget	47.8575
Sgpp2	59.288	-3.38087	0.391759	-8.62999	6.13598e-18	7.4726e-17	48.285	27.5351	46.6036	71.6972	28.2209	23.8181	33.062	107.944	34.7649	29.7583	43.5351	62.9582	135.141	136.708	Nontarget	22.6816
Maml3	304.337	0.327353	0.24299	1.34719	0.17792	0.262761	301.345	232.212	312.91	417.147	299.576	234.517	339.804	650.297	342.603	197.397	281.213	428.6	117.433	105.665	Nontarget	10.3935
Frg2f1	12.6322	-1.42373	0.969653	-1.46829	0.142025	0.218356	2.90874	16.521	9.32073	32.5896	12.3014	13.7412	13.4697	5.26557	8.97159	7.93555	7.05974	4.84294	18.6402	23.2821	Nontarget	7.14828
Fam222a	144.444	0.7898	0.312561	2.52687	0.0115086	0.0241328	178.596	58.7415	242.339	204.228	168.602	67.7901	193.474	231.685	174.385	66.4602	215.322	145.288	40.0764	35.2217	Nontarget	8.07187
Tmem178b	79.1687	-0.692841	0.398301	-1.73949	0.0819481	0.136286	121.003	15.6032	101.196	121.668	107.818	12.8251	94.2879	171.131	99.2482	22.8147	85.8935	113.809	19.5722	21.4912	Nontarget	1.23417
Whamm	52.1095	1.78071	0.553953	3.21456	0.00130646	0.00334063	79.1176	22.0281	59.919	19.5538	79.5975	40.3076	82.655	65.8196	76.8192	42.6536	90.0117	26.6362	28.8923	15.5214	Nontarget	4.68823
Zfp560	60.9255	-0.699829	0.353209	-1.98135	0.0475523	0.0852516	38.9771	61.495	49.2667	76.0425	54.271	48.5523	49.593	131.639	44.2972	58.5247	54.713	99.2802	39.1444	47.1612	Nontarget	6.93502
Gm5617	10.6471	-2.15031	0.802239	-2.68039	0.0073537	0.0161605	5.23572	9.17836	7.9892	19.5538	3.61807	9.16082	12.2452	5.26557	7.28942	7.93555	5.88312	12.1073	23.3002	20.2972	Nontarget	38.4682
Rhox8	1632.96	3.82704	0.515533	7.42346	1.14102e-13	9.55724e-13	3611.49	131.251	1607.16	1357.9	4137.62	73.2866	2889.86	855.655	3451.82	78.3635	2808.01	1828.21	17.7082	13.1335	Nontarget	10.0723
Nlrp4e	6.94249	-1.09101	1.25793	-0.867304	0.385776	0.493256	1.16349	14.6854	1.33153	19.5538	1.44723	19.2377	0.612259	0	4.48579	12.8953	2.35325	2.42147	7.45607	9.55164	Nontarget	1.80502
Tpgs2	134.301	0.207013	0.244691	0.846019	0.397542	0.504979	87.2621	210.184	107.854	84.733	83.9392	220.776	108.37	81.6163	83.5479	208.308	95.8948	72.6441	225.546	209.539	Nontarget	39.8312
Nuak1	102.292	-0.0759953	0.282804	-0.268721	0.788144	0.845991	86.0986	109.222	93.2073	104.287	73.8086	112.678	93.0634	131.639	74.5763	134.904	93.5416	162.238	87.6088	75.2192	Nontarget	9.49762
Asap2	97.6133	0.390188	0.278393	1.40158	0.161042	0.242186	84.9351	134.004	66.5766	93.4236	77.4266	172.223	75.9202	100.046	68.4084	146.808	62.9494	125.916	77.3567	80.592	Nontarget	9.38675
Actr3b	66.1485	0.722053	0.332894	2.16902	0.0300812	0.0569179	47.7033	95.4549	75.8974	54.3161	65.1252	91.6082	60.6137	55.2884	65.044	85.3072	51.1831	65.3797	54.0565	59.1008	Nontarget	19.4517
Scube3	29.6512	-2.99765	0.577526	-5.19051	2.09722e-07	9.21284e-07	16.2889	27.5351	13.3153	45.6255	11.5778	37.5594	7.34711	47.3901	6.72869	24.7986	12.9429	16.9503	73.6287	73.4282	Nontarget	14.5757
Cxxc4	93.8597	1.70982	0.373998	4.57175	4.8367e-06	1.80432e-05	113.441	44.974	129.159	106.459	107.095	48.5523	143.269	131.639	121.677	42.6536	131.782	167.081	14.9121	11.3426	Nontarget	1.66764
Pik3r6	11.7124	0.267509	0.692367	0.386369	0.699223	0.77558	8.72621	17.4389	7.9892	19.5538	7.95975	16.4895	9.18389	10.5311	9.53231	17.855	9.41299	9.68588	13.0481	6.56675	Nontarget	1.84176
Pigu	59.2412	-5.46722	0.68068	-8.032	9.58978e-16	9.74666e-15	29.0874	24.7816	33.2883	234.645	13.025	7.32866	19.5923	81.6163	22.9897	15.8711	21.7675	77.487	133.277	114.62	Nontarget	56.759
Ypel2	147.466	0.231079	0.286724	0.805928	0.420285	0.527422	209.429	77.0982	187.746	186.847	178.009	65.9579	217.964	115.842	243.915	84.3152	185.907	130.759	87.6088	93.1285	Nontarget	12.2148
Sp9	8.88118	-0.284933	0.897706	-0.317401	0.75094	0.816656	5.81747	13.7675	7.9892	13.0359	7.23613	16.4895	6.73485	0	3.92507	6.94361	7.05974	14.5288	13.0481	7.76071	Nontarget	2.72666
Zfp960	28.5395	-1.16332	0.95372	-1.21977	0.222552	0.316241	22.6881	17.4389	43.9406	8.69057	19.5376	21.0699	28.7762	57.9212	19.6253	16.863	35.887	0	52.1925	54.9219	Nontarget	16.7743
Gprasp1	1288.5	0.96099	0.196454	4.89169	9.9974e-07	4.0564e-06	1756.29	860.93	1387.46	1470.88	1653.46	950.893	1331.05	1942.99	1597.5	1087.17	1509.61	1569.11	471.596	450.121	Nontarget	48.9842
Ppp1r26	139.421	1.34124	0.269662	4.97376	6.56655e-07	2.72729e-06	169.288	139.511	191.741	128.186	163.537	141.077	164.698	126.374	124.481	156.727	172.375	123.495	82.9488	67.4585	Nontarget	7.99801
Mreg	83.5384	0.259818	0.362596	0.716549	0.473653	0.578835	45.958	151.443	39.946	34.7623	45.5876	142.909	61.8382	55.2884	52.1474	181.526	48.8299	92.0158	106.249	111.038	Nontarget	29.8347
Barhl2	52.1707	1.14044	0.554505	2.05669	0.039716	0.0726186	40.1406	100.044	54.5928	23.8991	21.7084	59.5453	39.7969	21.0623	33.6435	111.098	48.8299	14.5288	68.9686	92.5315	Nontarget	26.1594
Arhgap30	44.6704	0.270621	0.489044	0.553367	0.580012	0.675542	44.7945	25.6994	33.2883	91.251	47.7585	21.986	41.0214	52.6557	53.2688	23.8066	54.713	113.809	11.1841	10.1486	Nontarget	1.39357
Eif2a	214.688	0.755521	0.396284	1.90651	0.0565838	0.0991417	147.182	281.776	218.371	206.401	195.376	342.615	213.066	71.0851	194.011	307.503	170.61	82.33	300.107	275.207	Nontarget	92.3746
Itgb4	19.0077	-0.439344	0.773798	-0.567776	0.570187	0.666672	8.72621	47.7275	6.65766	6.51793	1.44723	45.8041	3.67356	2.63278	6.72869	42.6536	5.88312	21.7932	35.4163	30.4459	Nontarget	3.13235
Parl	78.4925	-0.0505713	0.323338	-0.156404	0.875715	0.912776	45.3763	120.236	43.9406	47.7981	54.271	154.818	47.144	68.4524	57.7546	108.122	58.2429	62.9582	112.773	117.008	Nontarget	66.2572
Patj	262.219	0.877901	0.254762	3.44596	0.000569034	0.00156262	294.364	315.736	230.355	197.71	211.295	405.824	202.658	247.482	223.168	429.512	247.091	222.775	239.526	203.569	Nontarget	30.2206
Zfp69	16.7619	0.0700671	0.763392	0.0917839	0.92687	0.94921	15.1254	22.9459	13.3153	2.17264	18.814	23.8181	19.5923	13.1639	7.28942	17.855	8.23636	14.5288	27.9603	29.8489	Nontarget	8.02779
Mtus1	512.958	1.24569	0.151585	8.21779	2.07291e-16	2.22159e-15	724.275	319.407	681.745	504.053	697.563	352.692	761.038	437.042	671.748	388.842	707.151	493.98	231.138	210.733	Nontarget	22.2473
Zbtb9	145.928	0.116932	0.266871	0.438161	0.66127	0.743765	121.585	172.553	93.2073	84.733	122.291	227.188	124.289	123.741	118.313	199.381	130.017	106.545	184.538	234.612	Nontarget	51.1406
Adam22	48.8294	-2.4299	0.613287	-3.96209	7.42953e-05	0.000235753	40.1406	34.8778	35.9514	95.5963	26.0501	22.902	31.8375	15.7967	29.1577	37.6939	41.7701	33.9006	130.481	107.456	Nontarget	16.8226
Zdhhc23	19.8958	-4.95512	0.679138	-7.29619	2.96026e-13	2.3806e-12	4.07223	16.521	5.32613	28.2443	4.34168	8.24474	3.0613	7.89835	3.36435	10.9114	4.11818	14.5288	80.1528	87.7557	Nontarget	51.5263
Spag8	5.53355	-0.848299	1.21297	-0.699357	0.484329	0.589056	1.16349	6.42485	2.66307	10.8632	5.06529	11.9091	1.22452	5.26557	1.68217	12.8953	2.35325	0	11.1841	4.77582	Nontarget	4.17382
Slc25a42	65.1045	-3.91862	0.54452	-7.19646	6.17956e-13	4.81487e-12	43.0493	32.1243	19.973	206.401	40.5224	8.24474	37.3478	173.764	46.5401	10.9114	38.2403	140.445	57.7845	56.1159	Nontarget	10.9434
D8Ertd738e	49.064	-1.78738	0.511946	-3.49135	0.000480593	0.00133821	19.1977	55.0702	26.6307	54.3161	14.4723	76.0348	37.9601	44.7573	31.9613	39.6777	30.0039	70.2226	92.2689	94.3225	Nontarget	141.792
Trpv5	4.55481	-0.633237	1.38611	-0.456844	0.647783	0.733338	4.07223	6.42485	3.9946	2.17264	2.17084	2.74825	0.612259	2.63278	1.12145	12.8953	1.76494	2.42147	11.1841	9.55164	Nontarget	2.5373
A830010M20Rik	74.4675	-0.114827	0.409848	-0.28017	0.779347	0.839711	85.5168	69.7555	74.5658	76.0425	68.7433	79.6991	66.7363	115.842	63.9226	91.2588	55.3013	36.322	84.8128	74.0252	Nontarget	8.82771
Zfp58	42.1525	0.599844	0.530703	1.13028	0.258358	0.357021	32.5778	44.974	54.5928	26.0717	52.1002	55.881	38.5723	28.9606	24.6719	58.5247	37.0636	12.1073	72.6967	51.3401	Nontarget	20.6833
Tceanc	57.0229	-0.614997	0.387638	-1.58652	0.11262	0.178597	61.0834	44.974	54.5928	73.8698	73.8086	31.1468	58.7769	31.5934	58.3153	40.6697	75.3039	46.0079	71.7647	76.4131	Nontarget	14.4158
Armcx6	44.2866	-0.307528	0.497507	-0.618138	0.536484	0.637585	57.593	11.9319	51.9298	39.1076	57.8891	11.9091	53.8788	76.3507	58.3153	17.855	52.9481	104.123	13.0481	13.1335	Nontarget	4.02572
Fndc3c1	61.6195	-0.019595	0.775833	-0.0252568	0.97985	0.987211	18.0342	103.715	26.6307	15.2085	16.6431	138.328	18.3678	84.2491	29.7184	149.783	17.061	186.453	29.8243	28.6549	Nontarget	4.26691
Trp53rka	80.7995	0.503202	0.273319	1.84108	0.0656097	0.112636	69.8097	119.319	62.582	73.8698	59.3363	114.51	72.8589	55.2884	72.3334	123.001	67.0675	77.487	80.1528	83.5769	Nontarget	32.0688
Rtn1	17.3829	-3.30542	1.54101	-2.14497	0.031955	0.0600169	8.14446	26.6172	0	8.69057	10.1306	15.5734	0	36.859	2.2429	27.7744	0.588312	2.42147	49.3965	54.9219	Nontarget	24.3125
Daam2	2074.18	2.71529	0.314527	8.63293	5.97979e-18	7.29313e-17	4118.77	185.403	3376.77	1777.22	3557.28	206.118	2745.37	2803.91	4168.98	297.583	3346.91	2346.4	55.9205	51.937	Nontarget	5.34195
Asap3	42.9822	-0.171157	0.391201	-0.437518	0.661736	0.743956	28.5056	42.2204	37.2829	56.4887	36.9043	39.3915	38.5723	73.7179	38.69	50.5891	46.4766	50.8509	29.8243	32.2368	Nontarget	3.28593
Bnip2	658.247	1.16712	0.152301	7.66322	1.81323e-14	1.62679e-13	845.86	469.932	901.448	606.167	993.521	485.523	915.328	518.658	950.428	435.463	922.473	445.55	359.755	365.35	Nontarget	42.8198
Nol10	498.115	2.68043	0.239861	11.1749	5.40992e-29	1.40132e-27	511.937	817.792	362.177	186.847	551.393	958.222	436.541	218.521	537.174	1039.56	456.53	188.875	373.736	334.307	Nontarget	88.2528
Scaf1	578.594	1.01586	0.268213	3.78749	0.000152174	0.000461183	571.857	674.609	511.309	417.147	555.012	685.229	563.279	845.123	582.592	861.999	570.074	600.524	322.475	339.083	Nontarget	46.0711
Thoc6	58.7333	0.817887	0.355463	2.3009	0.021397	0.0420961	39.5588	115.647	25.2991	28.2443	31.1154	133.748	37.9601	55.2884	37.0078	119.033	37.652	36.322	61.5126	63.8766	Nontarget	27.4592
Zfp975	97.9328	-0.319628	0.361442	-0.884312	0.376528	0.483564	95.4065	44.974	142.474	156.43	115.055	52.2167	145.105	113.21	131.77	33.7261	124.134	106.545	65.2406	44.7733	Nontarget	14.4548
Wdr34	95.2609	-0.264887	0.321926	-0.822821	0.41061	0.51819	63.4104	132.168	97.2019	119.495	62.9544	111.762	71.6343	63.1868	80.1836	124.985	77.0688	75.0655	135.141	119.396	Nontarget	47.079
Zfp760	59.9647	-2.28665	0.633405	-3.61008	0.000306097	0.000884827	65.7374	9.17836	78.5604	71.6972	71.6377	16.4895	74.6956	168.498	56.6331	10.9114	88.2468	31.4791	43.8044	51.937	Nontarget	8.50541
Bbs12	30.8079	0.477177	0.498574	0.957083	0.338525	0.4439	26.1786	36.7134	34.6198	8.69057	23.8792	48.5523	23.2659	21.0623	23.5504	42.6536	21.7675	14.5288	50.3285	55.5189	Nontarget	17.1982
Zfp658	27.5103	1.50796	0.585538	2.57534	0.0100142	0.0212992	19.7794	36.7134	31.9568	8.69057	31.1154	37.5594	36.7356	7.89835	21.3075	37.6939	30.0039	14.5288	33.5523	37.6096	Nontarget	6.46242
Zfyve26	319.712	0.0306103	0.300878	0.101737	0.918966	0.943985	264.113	355.202	255.654	165.121	225.044	507.509	205.107	310.668	245.597	549.537	238.266	305.105	422.2	426.839	Nontarget	26.6091
Il4ra	49.6353	-4.21477	0.416137	-10.1283	4.13656e-24	7.90297e-23	27.9239	24.7816	26.6307	121.668	23.8792	18.3216	25.7149	118.475	17.9432	14.8792	25.2974	92.0158	62.4446	94.9194	Nontarget	8.75376
Kbtbd8	152.319	1.09531	0.341952	3.2031	0.00135955	0.00346461	114.604	218.445	119.838	63.0066	109.989	309.636	100.411	28.9606	117.752	309.486	97.6598	101.702	223.682	217.3	Nontarget	35.4074
Armcx5	82.5338	1.65794	0.36385	4.55666	5.19723e-06	1.9314e-05	85.5168	89.0301	107.854	45.6255	86.11	102.601	94.2879	36.859	119.434	93.2427	97.0714	12.1073	93.2009	92.5315	Nontarget	23.9033
Mief2	62.2285	0.50725	0.363046	1.39721	0.162351	0.243867	52.3572	81.6874	73.2343	45.6255	46.3113	83.3635	59.3892	34.2262	53.2688	76.3797	63.5377	46.0079	91.3369	64.4736	Nontarget	18.451
Slc25a51	265.908	-2.36484	0.256507	-9.21938	2.9881e-20	4.38167e-19	237.935	55.988	324.894	504.053	301.023	68.7061	303.681	389.652	273.073	59.5166	361.812	404.385	223.682	214.315	Nontarget	34.1338
Cep44	89.3419	2.45424	0.354759	6.91805	4.57916e-12	3.26467e-11	62.2469	201.924	63.9136	39.1076	73.8086	211.615	58.1646	13.1639	66.7262	195.413	56.4779	21.7932	103.453	82.9799	Nontarget	59.5062
Ficd	22.0085	-2.71019	0.808195	-3.35338	0.000798298	0.00213232	18.6159	18.3567	14.6469	60.834	12.3014	12.8251	10.4084	5.26557	9.53231	18.8469	11.1779	14.5288	42.8724	57.9068	Nontarget	9.97119
Mdc1	554.026	1.23263	0.160581	7.67611	1.63998e-14	1.481e-13	703.914	574.565	641.799	328.069	587.574	674.236	615.933	421.245	619.6	628.892	674.205	365.642	445.5	475.194	Nontarget	37.8142
Ppp1r13l	53.6566	2.61523	0.446081	5.86267	4.55485e-09	2.41804e-08	50.612	96.3728	62.582	17.3811	38.3515	82.4474	48.3685	31.5934	46.5401	120.025	57.6546	48.4294	25.1642	25.67	Nontarget	5.10322
Ecm2	89.4278	-4.93382	0.544864	-9.05514	1.36392e-19	1.89255e-18	64.5739	32.1243	42.609	215.092	62.2308	6.41257	42.8582	229.052	60.5582	6.94361	42.3584	227.618	110.909	108.65	Nontarget	21.8786
Zfp708	55.5226	-0.0476458	0.447619	-0.106443	0.915231	0.941436	53.5207	35.7956	71.9028	54.3161	47.0349	37.5594	80.8182	60.554	68.4084	49.5972	73.539	21.7932	63.3766	59.1008	Nontarget	21.1451
Hacd1	22.5236	-2.66164	0.612758	-4.3437	1.40102e-05	4.93358e-05	13.9619	7.34269	18.6415	60.834	21.7084	10.993	15.3065	18.4295	21.3075	8.92749	24.1208	38.7435	25.1642	29.8489	Nontarget	31.9707
AU022252	38.1621	-1.04564	0.526384	-1.98645	0.0469833	0.0843413	25.5969	18.3567	59.919	21.7264	39.7987	23.8181	42.8582	50.0229	31.9613	29.7583	42.9468	31.4791	58.7166	57.3098	Nontarget	21.8772
Ankrd6	110.326	0.136542	0.299915	0.455271	0.648915	0.734317	81.4446	191.828	59.919	95.5963	73.8086	159.398	80.206	34.2262	76.8192	181.526	80.5987	75.0655	178.014	176.108	Nontarget	25.2385
Rims1	122.316	-0.10954	0.298898	-0.366479	0.714008	0.786908	76.2089	196.417	57.2559	173.811	78.1503	182.3	67.9608	131.639	90.8373	242.034	69.4208	106.545	125.821	114.023	Nontarget	11.6974
Adcy5	100.478	-1.22456	0.357984	-3.42071	0.000624573	0.00169737	98.3153	58.7415	95.8703	108.632	94.0698	36.6433	114.492	200.092	110.463	50.5891	90.0117	217.932	63.3766	67.4585	Nontarget	5.53766
Zfp787	56.8962	-0.24007	0.387596	-0.619381	0.535665	0.636956	52.3572	60.5772	62.582	49.9708	50.6529	42.1398	61.2259	84.2491	66.7262	41.6616	48.2416	89.5944	38.2124	48.3552	Nontarget	15.6684
Usp13	14.1574	1.14876	0.808656	1.42058	0.15544	0.235195	16.8707	17.4389	5.32613	10.8632	23.1556	21.986	16.531	5.26557	10.6538	11.9033	20.5909	12.1073	11.1841	14.3275	Nontarget	1.74844
Tgfbrap1	221.176	0.652551	0.276473	2.36027	0.0182615	0.0366028	180.342	259.748	219.703	136.876	174.391	304.139	233.883	247.482	216.44	345.196	181.788	188.875	202.246	205.36	Nontarget	21.6889
Ttf2	167.927	1.50615	0.258169	5.83399	5.41176e-09	2.84915e-08	106.46	305.639	133.153	58.6613	123.738	358.188	114.492	63.1868	113.827	371.979	117.662	101.702	173.354	208.942	Nontarget	27.1105
Tmem263	126.115	-0.567314	0.407124	-1.39347	0.163479	0.245159	166.38	34.8778	185.083	117.323	185.245	21.986	235.108	100.046	178.871	20.8308	198.849	220.354	47.5324	53.131	Nontarget	10.3184
Ctc1	237.1	0.782476	0.202146	3.87085	0.000108455	0.00033558	220.482	283.611	238.344	202.056	223.597	347.195	218.577	192.193	220.925	341.229	198.261	251.833	173.354	207.748	Nontarget	26.4873
Npcd	42.2987	-0.253631	0.54543	-0.465012	0.641923	0.728764	60.5017	31.2064	39.946	78.2151	28.9445	38.4754	28.7762	89.5146	37.5685	31.7422	34.7104	48.4294	29.8243	14.3275	Nontarget	2.63915
Wdr91	90.1243	0.881156	0.331693	2.65654	0.00789463	0.0172256	51.7755	143.182	65.2451	71.6972	62.2308	189.629	63.0627	47.3901	70.0905	183.51	57.0662	31.4791	107.181	118.202	Nontarget	26.8512
Prkaa1	175.814	1.10276	0.316411	3.48521	0.000491743	0.00136558	247.243	107.387	266.307	117.323	261.948	109.93	241.842	215.888	239.429	127.961	248.856	82.33	92.2689	102.68	Nontarget	15.5379
E2f8	56.0437	-0.362421	0.505938	-0.716335	0.473784	0.578953	42.4675	29.3707	70.5712	41.2802	75.9794	39.3915	71.6343	86.8818	40.9329	43.6455	84.1286	58.1153	51.2605	48.9522	Nontarget	9.09374
Dtx3l	124.154	1.1726	0.305433	3.83913	0.000123472	0.000379204	103.551	167.964	115.843	99.9415	131.698	192.377	121.84	52.6557	122.799	206.324	94.7182	65.3797	147.257	115.814	Nontarget	17.7443
Nrp	10.4658	-2.3213	0.98962	-2.34565	0.0189938	0.0378594	6.98097	14.6854	2.66307	10.8632	7.95975	9.16082	6.73485	2.63278	1.12145	6.94361	7.05974	21.7932	27.0283	20.8942	Nontarget	18.746
Lman2l	27.3545	-3.48807	0.685129	-5.09112	3.55964e-07	1.52558e-06	26.7604	22.0281	18.6415	69.5246	12.3014	10.993	9.79615	31.5934	17.3825	6.94361	14.1195	33.9006	54.0565	54.9219	Nontarget	15.5152
Utp18	379.385	2.65729	0.220035	12.0767	1.40299e-33	4.84047e-32	400.242	550.702	368.835	121.668	437.786	660.495	435.929	71.0851	441.851	608.061	380.049	152.553	344.843	337.292	Nontarget	98.7682
Rpp38	29.549	-1.53586	0.713339	-2.15306	0.0313143	0.0589475	8.72621	48.6453	14.6469	47.7981	28.2209	35.7272	11.0207	13.1639	13.4574	41.6616	7.64805	19.3718	61.5126	62.0857	Nontarget	51.8925
Arhgef39	10.7462	1.11809	0.854913	1.30784	0.190926	0.278707	8.14446	17.4389	10.6523	8.69057	5.06529	24.7342	13.4697	13.1639	5.60724	17.855	4.70649	4.84294	6.52406	9.55164	Nontarget	2.2065
Zfp930	45.0807	-1.45162	0.489005	-2.96852	0.00299238	0.0071442	24.4334	33.9599	45.2721	43.4528	30.3918	35.7272	45.9194	31.5934	24.1111	39.6777	40.0052	19.3718	104.385	112.829	Nontarget	27.8892
Rsad1	70.5756	-0.710253	0.326854	-2.173	0.0297806	0.0564504	50.612	86.2766	47.9352	54.3161	47.7585	92.5243	48.9807	110.577	61.6797	80.3474	50.0065	60.5367	101.589	94.9194	Nontarget	15.6013
Zfp182	63.6571	-0.642277	0.439901	-1.46005	0.144277	0.221159	99.4788	11.9319	105.191	82.5604	95.517	10.0769	112.656	34.2262	86.9123	13.8872	115.309	58.1153	37.2803	28.0579	Nontarget	4.11995
Mrs2	87.059	-0.0692687	0.29587	-0.234119	0.814893	0.867099	85.5168	77.0982	86.5496	95.5963	109.266	62.2936	94.9002	65.8196	97.566	78.3635	92.9533	118.652	82.0168	72.2343	Nontarget	26.8569
Tcaim	44.6877	1.00496	0.470493	2.13598	0.0326812	0.0612762	52.939	61.495	61.2505	41.2802	35.4571	54.9649	37.9601	13.1639	39.2507	50.5891	56.4779	31.4791	47.5324	41.7884	Nontarget	11.4253
Neurl4	310.239	0.555818	0.298422	1.86252	0.0625295	0.108042	211.174	520.413	233.018	143.394	210.572	549.649	223.475	358.059	210.832	570.368	215.91	198.56	343.911	354.008	Nontarget	37.7225
Ric8b	302.659	0.889294	0.2193	4.05514	5.01048e-05	0.000163449	220.482	491.96	227.692	206.401	222.149	534.992	221.638	226.419	230.458	579.295	239.443	111.388	377.464	347.441	Nontarget	50.686
Inip	93.4383	-1.47276	0.417727	-3.52566	0.000422437	0.00118808	82.6081	59.6593	91.8757	152.085	85.3864	43.9719	115.717	50.0229	93.0802	51.5811	100.601	152.553	115.569	113.426	Nontarget	23.5329
Ercc6l2	307.445	0.364783	0.192346	1.89649	0.0578948	0.101149	338.577	238.637	384.813	367.177	327.797	243.678	371.641	308.036	392.507	273.776	346.516	259.097	237.662	214.315	Nontarget	34.0384
Tmem151b	19.8667	-3.39457	0.706771	-4.80292	1.56365e-06	6.18945e-06	8.72621	15.6032	10.6523	65.1793	12.3014	2.74825	7.34711	63.1868	9.53231	7.93555	11.1779	29.0576	16.7762	17.9093	Nontarget	2.1571
5730409E04Rik	108.174	0.394045	0.339138	1.1619	0.245276	0.342321	154.745	51.3988	139.811	169.466	124.462	34.8111	169.596	105.311	141.863	54.5569	140.607	157.395	29.8243	40.5945	Nontarget	8.29217
Grhl3	30.7327	1.748	0.892564	1.9584	0.0501829	0.0893027	22.1064	57.8237	19.973	0	14.4723	88.8599	9.18389	0	14.5788	50.5891	30.5922	21.7932	53.1245	47.1612	Nontarget	12.2644
Rsl1	25.1012	-0.561046	1.04094	-0.538981	0.5899	0.684166	23.8516	34.8778	14.6469	4.34528	7.95975	39.3915	23.2659	63.1868	27.4755	14.8792	20.0026	4.84294	34.4843	38.2066	Nontarget	12.6255
Lipo3	46.7753	-1.34342	0.648267	-2.07233	0.0382346	0.0702385	48.285	18.3567	66.5766	117.323	59.3363	8.24474	48.3685	21.0623	69.5298	17.855	52.3597	65.3797	25.1642	37.0126	Nontarget	8.73626
Zfp488	777.395	-5.95224	1.07367	-5.54384	2.95902e-08	1.4332e-07	602.69	241.391	430.085	2198.71	398.711	27.4825	243.679	1066.28	484.466	17.855	464.766	1314.86	1795.05	1597.51	Nontarget	264.306
Tvp23a	19.3282	-1.46596	0.647409	-2.26435	0.0235528	0.0459165	16.2889	14.6854	11.9838	13.0359	13.7487	19.2377	20.2046	13.1639	18.5039	9.91944	18.2377	43.5864	25.1642	32.8338	Nontarget	5.40804
Aim2	109.909	-2.29454	0.768327	-2.98641	0.00282274	0.00677627	145.437	76.1804	83.8866	286.789	86.8336	13.7412	48.3685	157.967	142.424	14.8792	102.366	222.775	93.2009	63.8766	Nontarget	26.3151
Ccdc92b	24.023	-0.377311	0.562002	-0.67137	0.501985	0.605445	10.4714	39.4669	21.3045	28.2443	11.5778	34.8111	10.4084	21.0623	10.6538	56.5408	12.3545	12.1073	34.4843	32.8338	Nontarget	4.64566
Zscan26	179.801	-1.11424	0.212952	-5.23236	1.67355e-07	7.44472e-07	194.304	73.4269	219.703	197.71	213.466	67.7901	222.25	255.38	210.272	82.3313	237.09	242.147	149.121	152.229	Nontarget	26.2684
Fam169b	56.2128	-2.91207	0.569936	-5.10947	3.23064e-07	1.39289e-06	36.6501	47.7275	18.6415	112.977	32.5626	32.0629	16.531	94.7802	42.0543	46.6214	33.5338	38.7435	131.413	102.68	Nontarget	29.2307
Maml2	44.2855	-0.629689	0.604678	-1.04136	0.297708	0.400123	50.0303	7.34269	55.9244	45.6255	73.085	10.993	54.4911	86.8818	52.1474	2.97583	65.8909	96.8588	11.1841	6.56675	Nontarget	1.1119
Gm5622	27.2367	-0.460974	0.900437	-0.511945	0.60869	0.700502	19.1977	45.8918	9.32073	63.0066	26.0501	29.3146	15.3065	2.63278	29.1577	30.7503	22.9442	12.1073	41.0084	34.6247	Nontarget	20.3167
Sp140	10.9001	1.88077	1.08494	1.73352	0.0830031	0.137791	7.56271	13.7675	6.65766	6.51793	22.432	10.0769	5.51033	7.89835	21.8682	15.8711	14.7078	0	8.38808	11.3426	Nontarget	2.6615
Shf	54.7433	1.02096	0.3956	2.58078	0.00985766	0.0209987	65.1557	59.6593	67.9082	54.3161	56.4419	77.867	62.4504	23.695	56.0724	61.5005	47.0649	26.6362	50.3285	57.3098	Nontarget	23.9372
Prkg1	48.8984	0.319482	0.454624	0.702738	0.482219	0.587046	61.0834	28.4529	43.9406	56.4887	79.5975	29.3146	44.0827	76.3507	63.9226	42.6536	52.9481	55.6938	27.9603	22.0882	Nontarget	2.73678
Dyrk2	113.224	2.02077	0.377612	5.35143	8.72598e-08	4.01798e-07	141.946	33.0421	197.067	154.258	159.195	40.3076	163.473	115.842	176.628	49.5972	187.671	140.445	14.9121	10.7456	Nontarget	3.87395
Zfp985	30.771	0.43748	0.564109	0.775524	0.43803	0.54512	30.2508	24.7816	25.2991	15.2085	28.9445	45.8041	30.0007	0	24.1111	40.6697	25.2974	21.7932	64.3086	54.325	Nontarget	18.1668
Abi3bp	44.0256	-0.0862738	0.463132	-0.186283	0.852223	0.896397	55.8477	24.7816	62.582	84.733	31.1154	21.986	42.8582	68.4524	48.783	24.7986	40.0052	79.9085	16.7762	13.7305	Nontarget	2.69164
Snx13	343.16	-2.35395	0.295257	-7.97255	1.55436e-15	1.54279e-14	388.025	82.6052	388.808	951.617	322.732	82.4474	301.232	608.173	327.463	95.2266	310.04	510.93	221.818	213.121	Nontarget	24.6874
Ttll4	477.957	0.224434	0.194122	1.15615	0.247621	0.344686	354.284	762.722	356.851	510.571	322.008	816.229	265.721	500.229	357.181	810.418	292.979	414.071	429.656	498.476	Nontarget	64.3267
Fam189b	33.4807	-2.71874	0.594442	-4.57361	4.79397e-06	1.78959e-05	19.1977	35.7956	14.6469	26.0717	15.9195	34.8111	9.18389	81.6163	8.41086	44.6375	8.23636	46.0079	61.5126	62.6826	Nontarget	11.1293
Cenpj	394.9	1.85717	0.272134	6.82446	8.8257e-12	6.1283e-11	329.851	681.952	338.209	330.242	327.073	780.502	271.843	176.396	333.631	830.257	353.575	171.924	309.427	293.713	Nontarget	46.3364
Zfyve28	49.6127	-0.641339	0.448743	-1.42919	0.152949	0.232021	48.285	47.7275	35.9514	65.1793	49.2057	62.2936	37.3478	34.2262	30.2791	67.4522	27.0623	36.322	79.2207	74.0252	Nontarget	11.6834
Rap1gap2	18.2535	-3.33717	1.79632	-1.85778	0.0631999	0.109103	13.3802	0	11.9838	26.0717	13.025	29.3146	14.082	18.4295	0	0	12.9429	33.9006	46.6004	35.8187	Nontarget	3.58587
Dcaf1	553.034	1.78492	0.206438	8.64625	5.32195e-18	6.52937e-17	581.747	672.774	552.586	336.76	559.353	969.215	538.176	268.544	559.042	961.193	522.421	268.783	487.441	464.449	Nontarget	58.4968
Tyw1	156.762	-2.73788	0.426075	-6.42582	1.31159e-10	8.06672e-10	155.908	117.483	98.5334	280.271	83.2156	96.1886	65.5117	294.872	86.3515	119.033	70.5974	174.346	262.826	289.534	Nontarget	54.6174
Taf9	340.968	0.00385454	0.333211	0.0115679	0.99077	0.994172	123.33	605.772	167.773	121.668	130.25	742.942	174.494	144.803	120.556	537.633	154.726	55.6938	829.488	864.423	Nontarget	638.392
Tbata	254.532	-1.64856	1.00096	-1.64698	0.0995626	0.160917	24.4334	103.715	61.2505	2018.38	54.9946	252.839	78.9814	205.357	51.5866	151.767	50.5948	445.55	33.5523	30.4459	Nontarget	32.3866
Kdm6b	1222.51	1.09705	0.251106	4.36889	1.24878e-05	4.43243e-05	1360.12	945.371	1468.68	1092.84	1410.32	1008.61	1411.87	2111.49	1493.21	1057.41	1367.82	1547.32	377.464	462.658	Nontarget	34.7107
Rasef	12.076	1.13216	0.813322	1.39202	0.163917	0.245695	13.3802	19.2746	6.65766	19.5538	10.8542	15.5734	9.79615	0	15.7003	19.8389	11.1779	7.26441	7.45607	12.5365	Nontarget	1.39078
Cox17	77.7866	2.26988	0.491802	4.61544	3.92254e-06	1.4844e-05	97.1518	40.3848	94.5388	36.9349	159.919	37.5594	157.351	18.4295	140.742	34.718	154.138	65.3797	26.0962	25.67	Nontarget	145.028
Btbd11	17.5257	1.67256	0.645358	2.59169	0.00955068	0.0204237	11.0532	33.9599	9.32073	17.3811	15.9195	34.8111	13.4697	10.5311	14.0181	42.6536	11.1779	2.42147	14.9121	13.7305	Nontarget	2.36755
Zscan18	192.105	1.008	0.251113	4.01412	5.96669e-05	0.000191914	120.422	295.543	133.153	143.394	165.707	376.51	139.595	118.475	152.517	402.729	130.605	123.495	187.334	199.987	Nontarget	31.8399
Ddi2	395.593	0.851025	0.160714	5.29528	1.18837e-07	5.37611e-07	315.889	556.209	350.193	308.515	337.928	617.439	348.376	371.222	345.406	668.57	321.807	280.89	352.299	363.559	Nontarget	65.0051
C2cd3	336.272	-0.162283	0.197292	-0.822553	0.410762	0.518283	258.877	352.449	264.975	347.623	272.802	389.335	290.211	444.94	285.969	443.399	278.86	518.194	294.515	265.655	Nontarget	20.482
Rtl8b	13.3103	-0.0533498	0.765751	-0.0696699	0.944456	0.961089	8.14446	11.014	14.6469	19.5538	18.814	9.16082	10.4084	13.1639	10.093	14.8792	13.5312	29.0576	3.72803	10.1486	Nontarget	3.64461
Nxf3	150.144	1.1991	0.494325	2.42574	0.0152772	0.0311462	221.646	36.7134	235.681	197.71	216.36	37.5594	180.004	89.5146	425.029	39.6777	237.678	123.495	31.6883	29.2519	Nontarget	7.39613
Fbxo10	324.1	0.542908	0.190317	2.85265	0.0043356	0.0100126	155.908	670.02	146.469	149.912	165.707	689.81	159.187	207.99	154.199	811.41	154.138	152.553	483.713	436.391	Nontarget	57.4925
Trappc1	30.3562	-0.962223	0.595109	-1.61689	0.105903	0.169473	19.7794	23.8637	26.6307	8.69057	33.2862	20.1538	37.9601	34.2262	19.6253	23.8066	37.652	26.6362	49.3965	63.2796	Nontarget	76.9911
Crls1	115.102	0.479945	0.327531	1.46534	0.142827	0.219324	134.384	61.495	173.099	182.502	147.617	59.5453	186.127	110.577	127.845	63.4844	149.431	118.652	44.7364	51.937	Nontarget	21.5452
Diras2	18.2401	-1.65799	0.712388	-2.32737	0.0199456	0.0395419	17.4524	12.8497	19.973	32.5896	22.432	7.32866	9.18389	31.5934	11.2145	5.95166	21.7675	33.9006	19.5722	9.55164	Nontarget	2.16023
Brd9	175.98	0.634318	0.270983	2.34081	0.0192421	0.0382943	165.216	184.485	150.463	134.704	212.742	240.93	188.576	200.092	155.881	192.437	194.731	147.71	143.529	152.229	Nontarget	41.9772
Fam149b	150.474	-0.00052253	0.226631	-0.00230565	0.99816	0.998825	157.653	146.854	133.153	162.948	143.275	146.573	183.678	163.233	160.367	128.953	155.903	138.024	146.325	139.693	Nontarget	42.8088
Shc2	60.354	0.591708	0.464112	1.27492	0.202336	0.292291	79.1176	20.1924	61.2505	54.3161	91.8989	29.3146	91.8389	118.475	69.5298	26.7825	74.1273	99.2802	12.1161	16.7154	Nontarget	2.32938
Cep170b	562.265	1.12133	0.176823	6.34154	2.27474e-10	1.37249e-09	673.663	355.202	778.947	573.578	708.418	386.587	695.527	721.383	786.696	376.939	673.029	786.977	171.49	183.272	Nontarget	15.2368
Ankrd28	365.534	0.473346	0.213857	2.21338	0.0268715	0.0515891	368.246	298.297	456.716	345.45	415.354	343.531	363.07	413.347	454.187	374.955	418.878	285.733	305.699	274.013	Nontarget	38.0276
Pdp2	85.3468	0.31192	0.319085	0.977544	0.3283	0.433345	62.8287	106.469	83.8866	56.4887	85.3864	122.755	56.3279	89.5146	81.8657	116.057	71.774	77.487	95.0649	88.9497	Nontarget	17.0145
Rabl6	741.794	1.65025	0.287302	5.74396	9.24889e-09	4.74681e-08	1039.58	437.808	841.529	460.6	1138.24	476.363	1089.82	921.474	1107.99	563.424	1065.43	786.977	230.206	225.658	Nontarget	41.9563
Tsku	28.3463	-4.72389	0.649894	-7.26871	3.6293e-13	2.90028e-12	5.23572	19.2746	13.3153	34.7623	7.95975	10.0769	9.18389	10.5311	7.85014	15.8711	8.82468	55.6938	93.2009	105.068	Nontarget	22.8587
Cdkl5	71.2621	0.433094	0.42175	1.0269	0.304469	0.407751	79.6994	74.3447	50.5982	63.0066	66.5724	83.3635	66.124	110.577	63.3618	91.2588	87.6585	38.7435	68.0366	54.325	Nontarget	12.8563
Carmil3	37.9015	1.00257	0.678	1.47871	0.139217	0.214817	36.6501	20.1924	19.973	21.7264	31.839	70.5383	33.062	26.3278	43.7365	86.2991	32.3571	43.5864	34.4843	29.8489	Nontarget	4.16086
Lrp3	21.9648	-1.12516	0.566203	-1.9872	0.0469005	0.0842109	16.2889	24.7816	11.9838	17.3811	12.3014	20.1538	16.531	21.0623	17.9432	26.7825	16.4727	53.2723	23.3002	29.2519	Nontarget	4.12105
Gm3696	21.5766	1.42092	1.085	1.3096	0.19033	0.278033	16.2889	38.5491	7.9892	26.0717	34.7334	46.7202	11.6329	15.7967	29.1577	32.7341	5.29481	0	25.1642	11.9396	Nontarget	6.81508
Triobp	301.556	0.995387	0.235805	4.22123	2.42968e-05	8.29433e-05	250.733	399.259	279.622	236.818	285.104	394.831	308.579	368.59	294.941	371.979	362.988	268.783	194.79	204.763	Nontarget	32.3335
Hmcn1	286.263	-2.58235	0.230361	-11.21	3.64293e-29	9.60175e-28	268.767	146.854	246.334	484.499	199.717	105.349	216.74	602.907	232.701	127.961	203.556	527.88	349.503	294.907	Nontarget	10.597
Zfp607a	60.5144	-3.55158	0.40068	-8.86389	7.72708e-19	1.00077e-17	34.9048	17.4389	37.2829	117.323	45.5876	21.986	49.593	173.764	47.6616	13.8872	31.1805	135.602	55.9205	65.0706	Nontarget	12.1473
Gm20939	18.9063	-1.59555	0.707349	-2.25568	0.0240909	0.0468218	18.0342	14.6854	23.9676	32.5896	15.9195	13.7412	20.8168	13.1639	8.41086	10.9114	12.9429	7.26441	38.2124	34.0277	Nontarget	11.9921
Cebpz	972.993	2.99586	0.209741	14.2836	2.76844e-46	1.92232e-44	1081.47	1319.85	1103.84	371.522	1118.71	1767.12	1096.56	215.888	1184.81	1523.63	1067.79	249.411	774.499	746.819	Nontarget	133.631
Adarb1	97.6976	-0.729363	0.985993	-0.739724	0.459467	0.565809	76.7906	156.95	83.8866	78.2151	84.6628	105.349	1.22452	81.6163	66.7262	130.937	71.1857	75.0655	189.198	165.96	Nontarget	16.7488
Gm128	3.06916	1.24162	1.71557	0.723733	0.469229	0.575344	1.16349	6.42485	0	0	0	5.49649	1.83678	0	1.68217	7.93555	2.35325	0	6.52406	9.55164	Nontarget	3.8264
Gm14325	168.28	-3.21561	0.318689	-10.0901	6.10921e-24	1.15648e-22	197.212	44.974	169.105	271.58	156.301	30.2307	180.616	302.77	188.403	28.7664	156.491	176.767	256.302	196.406	Nontarget	38.1015
Rhox10	56.1335	-2.64494	0.551088	-4.79949	1.59068e-06	6.2934e-06	13.3802	73.4269	13.3153	169.466	9.40698	110.846	19.5923	68.4524	11.7752	71.4199	15.8844	60.5367	68.9686	79.398	Nontarget	87.2637
Ttbk2	370.863	0.0769532	0.206617	0.372444	0.709562	0.783213	352.539	353.367	400.791	351.968	369.766	338.034	429.806	447.573	379.05	407.689	341.221	300.262	382.124	337.889	Nontarget	21.3398
Sept10	351.729	1.95489	0.348312	5.61245	1.99477e-08	9.84928e-08	653.302	75.2625	391.471	312.86	633.885	98.9368	723.078	213.255	707.073	76.3797	622.434	322.055	42.8724	51.3401	Nontarget	18.0894
N4bp2	568.546	1.56043	0.183555	8.50116	1.87709e-17	2.21736e-16	672.5	555.291	660.44	391.076	634.609	648.586	617.77	400.183	759.781	759.829	701.856	411.65	361.619	384.454	Nontarget	45.5285
Trp53i13	15.9619	-1.62954	0.7727	-2.10889	0.0349541	0.0650729	5.23572	29.3707	5.32613	10.8632	13.025	14.6573	6.12259	7.89835	8.41086	25.7905	4.11818	29.0576	30.7563	32.8338	Nontarget	15.9772
Ddx49	145.634	1.98654	0.362754	5.47627	4.34385e-08	2.06639e-07	125.076	261.583	109.186	39.1076	143.275	217.111	121.84	28.9606	141.303	326.349	110.603	87.1729	156.577	170.736	Nontarget	51.9679
Cyb5d2	12.5927	-1.91935	0.846794	-2.26661	0.0234142	0.0456624	13.9619	8.26052	13.3153	30.417	11.5778	5.49649	14.082	2.63278	16.8217	1.98389	11.1779	9.68588	19.5722	17.3123	Nontarget	5.35207
Zfp667	131.583	2.21152	0.277402	7.97226	1.558e-15	1.54547e-14	111.114	222.116	142.474	78.2151	142.552	236.349	137.758	81.6163	137.377	206.324	118.251	41.165	91.3369	95.5164	Nontarget	18.0042
Qsox1	106.072	-3.98665	0.594645	-6.70425	2.02449e-11	1.35837e-10	97.7335	37.6313	122.501	351.968	44.864	11.9091	54.4911	184.295	62.2404	18.8469	72.9507	205.825	108.113	111.635	Nontarget	23.4349
Zfp563	48.1943	-0.210081	0.481056	-0.436708	0.662323	0.744342	54.6842	36.7134	50.5982	56.4887	75.2558	23.8181	71.6343	81.6163	54.951	19.8389	51.1831	31.4791	35.4163	31.0428	Nontarget	3.65237
Lrig2	151.819	-3.12015	0.388873	-8.02357	1.02716e-15	1.04204e-14	112.277	104.633	101.196	308.515	72.3613	94.3564	71.0221	200.092	73.4549	91.2588	87.6585	123.495	353.231	331.92	Nontarget	32.2257
Rhox1	23.6959	5.23122	1.28299	4.07737	4.55484e-05	0.000149464	15.1254	54.1523	13.3153	0	7.95975	61.3775	11.6329	0	8.97159	54.5569	18.826	0	34.4843	51.3401	Nontarget	41.5005
Cracr2b	13.4762	-1.05495	0.755607	-1.39616	0.162666	0.244251	12.2167	8.26052	15.9784	6.51793	8.68336	7.32866	13.4697	5.26557	16.261	13.8872	12.3545	26.6362	23.3002	18.5063	Nontarget	8.31489
Ccdc93	204.06	1.47519	0.252983	5.83116	5.50436e-09	2.89237e-08	224.554	227.623	179.757	123.841	240.24	243.678	258.373	129.006	254.008	286.672	218.852	176.767	153.781	139.693	Nontarget	12.449
Cxadr	149.611	-2.7195	0.61084	-4.45206	8.50485e-06	3.08226e-05	282.147	25.6994	242.339	447.564	131.698	16.4895	94.9002	184.295	142.424	20.8308	144.725	186.453	93.2009	81.7859	Nontarget	16.1971
Mbp	46.6238	-1.23144	0.618713	-1.99032	0.0465555	0.0836824	25.0151	59.6593	25.2991	108.632	31.1154	68.7061	18.3678	15.7967	31.9613	66.4602	21.1792	46.0079	58.7166	75.8161	Nontarget	14.4145
Miip	74.7889	-1.68391	0.384731	-4.37685	1.20404e-05	4.28374e-05	45.958	53.2345	43.9406	134.704	50.6529	51.3006	74.6956	168.498	40.9329	57.5327	71.1857	118.652	67.1046	68.6524	Nontarget	25.981
Adcyap1r1	44.627	-3.10024	0.577892	-5.36474	8.10645e-08	3.74106e-07	44.7945	21.1102	31.9568	126.013	34.7334	16.4895	28.1639	100.046	19.0646	17.855	32.9455	36.322	54.9885	60.2947	Nontarget	5.74314
Zfp943	83.5589	0.385043	0.405483	0.94959	0.342321	0.447988	84.9351	89.9479	106.523	63.0066	90.4517	97.1047	95.5124	47.3901	72.8942	47.6133	117.074	72.6441	90.4048	94.3225	Nontarget	27.7888
Gm14685	16.7291	0.375944	1.97425	0.190424	0.848977	0.894288	0	45.8918	13.3153	10.8632	13.7487	0	6.12259	18.4295	0	62.4924	15.2961	21.7932	14.9121	11.3426	Nontarget	3.09352
DXBay18	7.92619	3.56598	6.07346	0.587142	0.557109	0.65538	13.3802	0	0	0	0	51.3006	0	0	15.1396	0	0	0	10.2521	20.8942	Nontarget	3.45713
Eno1b	175.448	5.32472	2.72172	1.95638	0.0504203	0.0896349	317.052	537.852	0	4.34528	0	332.538	172.657	26.3278	22.9897	713.207	75.3039	0	113.705	140.29	Nontarget	46.7761
Src	260.357	0.778161	0.246997	3.15049	0.00162996	0.00408751	187.323	390.08	203.724	143.394	198.27	444.3	214.903	286.973	197.375	483.077	204.144	191.296	240.458	259.685	Nontarget	38.9485
Camk2d	173.412	0.62674	0.339427	1.84646	0.0648248	0.111523	241.425	72.509	262.312	115.15	272.079	66.874	228.985	268.544	254.008	64.4763	230.03	246.99	51.2605	53.131	Nontarget	6.9957
Sox6	132.433	1.23004	0.313808	3.91973	8.86491e-05	0.000278203	196.049	45.8918	185.083	175.984	185.245	46.7202	174.494	150.069	239.99	55.5488	179.435	169.503	27.9603	22.0882	Nontarget	1.89453
Dmbx1	10.2134	-1.29114	0.921991	-1.40039	0.161397	0.242676	8.14446	16.521	6.65766	28.2443	5.78891	13.7412	3.0613	10.5311	2.2429	4.95972	7.64805	19.3718	6.52406	9.55164	Nontarget	1.14292
Ccdc141	298.149	1.05283	0.232241	4.53338	5.80485e-06	2.14467e-05	271.676	341.435	259.649	154.258	284.38	439.719	304.905	189.56	324.659	409.673	333.573	118.652	393.308	348.635	Nontarget	38.499
Maf	193.602	0.165114	0.57605	0.286631	0.774395	0.835628	228.045	11.9319	197.067	208.574	380.621	6.41257	303.068	318.567	365.592	5.95166	341.809	326.898	9.32009	6.56675	Nontarget	1.83712
Nr2c2ap	18.4082	-0.202307	1.35948	-0.148813	0.881701	0.91667	22.1064	21.1102	22.6361	0	15.1959	15.5734	21.4291	44.7573	5.04652	29.7583	6.47143	0	27.9603	25.67	Nontarget	17.0075
Rfxank	68.2156	-1.72053	0.358214	-4.80309	1.56234e-06	6.18574e-06	61.6652	49.5631	59.919	91.251	60.7835	39.3915	45.9194	89.5146	77.3799	30.7503	64.7143	123.495	78.2887	82.3829	Nontarget	13.2671
Trim26	658.008	1.68589	0.141954	11.8763	1.57079e-32	5.08001e-31	984.316	554.373	884.138	562.714	898.004	523.083	860.224	589.743	926.877	555.488	828.343	491.558	270.283	282.967	Nontarget	53.0745
Szrd1	207.694	-0.996437	0.783175	-1.2723	0.203265	0.293376	33.7413	105.551	280.953	165.121	303.194	99.8529	337.967	376.488	280.362	107.13	130.605	377.749	153.781	155.214	Nontarget	30.1333
Dnm1l	347.635	0.386492	0.166709	2.31836	0.0204297	0.0404108	447.364	233.13	414.107	349.795	460.942	251.923	426.745	313.301	479.419	232.115	447.117	297.841	281.467	231.627	Nontarget	44.6847
Entpd5	78.3532	-2.51423	0.530091	-4.74302	2.1056e-06	8.21074e-06	121.003	11.014	90.5442	234.645	81.0447	17.4056	64.2872	115.842	91.9588	11.9033	67.6559	101.702	50.3285	37.6096	Nontarget	5.90221
Atad5	218.737	-0.33871	0.220273	-1.53768	0.124126	0.194442	174.524	190.91	185.083	297.652	209.848	243.678	203.882	242.216	177.189	250.962	214.734	239.725	228.342	203.569	Nontarget	20.9517
Pdzd4	87.9382	1.92051	0.34557	5.55752	2.73631e-08	1.32771e-07	70.9731	149.607	86.5496	19.5538	83.9392	133.748	84.4918	52.6557	91.9588	157.719	89.4234	58.1153	65.2406	87.1587	Nontarget	12.1038
Nova2	87.6775	-0.561855	0.314783	-1.7849	0.0742783	0.125412	42.4675	131.251	43.9406	73.8698	44.864	162.146	39.7969	134.272	48.2223	160.695	41.7701	133.181	75.4927	95.5164	Nontarget	6.03751
Lonrf2	143.016	0.917834	0.292162	3.14152	0.00168072	0.00420015	84.9351	249.651	87.8812	84.733	82.4919	335.286	78.3692	123.741	82.9872	349.164	70.0091	142.867	128.617	101.486	Nontarget	14.8004
Usf3	345.423	-0.56515	0.37327	-1.51405	0.130013	0.202334	436.892	77.0982	528.618	338.932	434.168	71.4544	454.296	829.327	455.869	101.178	468.884	423.757	112.773	102.68	Nontarget	5.41313
Mex3a	539.874	0.633273	0.195948	3.23184	0.00122996	0.00316068	544.515	521.331	520.629	423.665	631.715	564.306	612.872	663.461	569.135	555.488	624.787	583.574	360.687	382.066	Nontarget	40.4043
Ate1	324.698	0.981042	0.173017	5.67022	1.42615e-08	7.1615e-08	375.227	375.395	316.905	275.926	346.611	431.475	339.804	242.216	344.845	383.882	337.103	193.718	297.311	285.355	Nontarget	39.6814
Zswim5	264.449	2.0033	0.382141	5.2423	1.58583e-07	7.08501e-07	84.3533	603.018	118.506	39.1076	89.7281	852.872	86.9408	44.7573	104.295	909.612	65.8909	92.0158	278.671	332.516	Nontarget	36.0642
Zmynd15	10.7735	-2.43994	0.809844	-3.01285	0.00258803	0.00625288	2.32699	13.7675	5.32613	21.7264	7.95975	10.0769	7.95937	21.0623	2.2429	9.91944	2.94156	16.9503	13.0481	15.5214	Nontarget	3.04753
Rilp	8.09687	2.78284	1.18409	2.35019	0.0187637	0.0374593	12.7984	6.42485	9.32073	0	7.23613	7.32866	9.18389	5.26557	21.8682	7.93555	12.9429	2.42147	4.66004	5.96978	Nontarget	2.52494
Safb2	863.447	2.74436	0.274686	9.99091	1.67039e-23	3.08434e-22	1473.57	574.565	1061.23	441.046	1357.5	615.607	1170.64	645.032	1516.76	882.83	1286.64	573.888	229.274	259.685	Nontarget	41.9864
Man1b1	162.959	-3.65232	0.291263	-12.5396	4.53394e-36	1.83198e-34	133.22	61.495	139.811	371.522	117.949	43.0558	116.329	271.177	91.3981	55.5488	101.19	268.783	254.438	255.506	Nontarget	41.7982
Kcp	30.0874	-5.26419	0.806289	-6.52891	6.62494e-11	4.20768e-10	9.8897	14.6854	14.6469	10.8632	9.40698	10.0769	6.12259	105.311	10.6538	9.91944	9.41299	38.7435	80.1528	91.3376	Nontarget	9.30088
Mettl17	22.9727	-1.22142	0.605476	-2.01729	0.0436654	0.0790464	8.72621	38.5491	10.6523	17.3811	13.025	21.0699	18.98	39.4917	18.5039	28.7664	11.1779	26.6362	38.2124	30.4459	Nontarget	16.1886
Zc3h18	717.26	1.52493	0.295791	5.15544	2.53038e-07	1.10016e-06	801.066	761.804	689.734	404.111	815.512	903.257	742.058	863.553	860.151	1043.52	790.103	554.516	427.792	384.454	Nontarget	65.8264
Mcat	53.9215	-0.925095	0.508053	-1.82086	0.0686278	0.117031	25.0151	73.4269	39.946	76.0425	26.0501	71.4544	29.3884	18.4295	20.1861	103.162	35.887	50.8509	91.3369	93.7255	Nontarget	36.3998
Ndufs5	30.8219	3.60511	3.27938	1.09933	0.271624	0.371792	0	16.521	0	0	11.5778	31.1468	0	0	31.9613	149.783	2.35325	0	86.6768	101.486	Nontarget	276.818
Nudt10	59.5585	1.70561	0.731274	2.33239	0.0196804	0.0390489	76.2089	70.6734	67.9082	76.0425	67.2961	49.4684	77.7569	39.4917	94.7624	59.5166	81.187	0	40.0764	33.4307	Nontarget	17.7145
Gsk3a	215.228	0.179977	0.210939	0.853215	0.39354	0.501167	208.265	199.17	211.714	186.847	220.702	208.867	241.23	300.137	219.243	216.244	211.792	268.783	150.053	170.139	Nontarget	42.5625
Mrpl41	54.1108	0.329673	0.443668	0.743062	0.457444	0.56378	48.285	61.495	49.2667	36.9349	63.678	82.4474	58.1646	18.4295	42.0543	43.6455	54.1247	48.4294	80.1528	70.4433	Nontarget	23.0949
Smg1	2448.78	-0.461812	0.233643	-1.97657	0.0480905	0.0861325	3083.26	1145.46	3191.68	2355.14	2906.76	1605.89	2692.72	2724.93	2971.28	1736.89	2788.6	1791.89	2842.63	2445.82	Nontarget	109.933
Pecam1	25.5922	-2.36178	0.666187	-3.54522	0.000392279	0.00110836	24.4334	13.7675	33.2883	71.6972	19.5376	12.8251	12.8574	28.9606	17.9432	5.95166	13.5312	62.9582	21.4362	19.1033	Nontarget	4.13678
Ccdc189	41.8394	0.0143338	0.540799	0.0265048	0.978855	0.986685	23.2699	67.9199	22.6361	10.8632	27.4973	71.4544	37.9601	47.3901	39.2507	54.5569	25.8857	53.2723	51.2605	52.534	Nontarget	12.6025
Lrrc14b	12.8649	-4.51524	1.12955	-3.99737	6.40508e-05	0.000205296	2.90874	11.014	6.65766	28.2443	4.34168	1.83216	6.12259	0	9.53231	2.97583	5.29481	31.4791	34.4843	35.2217	Nontarget	7.74359
Ntrk1	19.6405	-1.55973	0.691148	-2.25672	0.0240255	0.0467168	11.6349	14.6854	22.6361	32.5896	18.814	10.0769	13.4697	7.89835	20.1861	9.91944	24.1208	46.0079	21.4362	21.4912	Nontarget	4.90612
Bbs1	42.5991	-0.761741	0.410834	-1.85414	0.0637197	0.10984	54.6842	34.8778	27.9622	43.4528	41.9696	29.3146	40.4091	39.4917	44.2972	31.7422	51.7714	38.7435	54.9885	62.6826	Nontarget	6.45202
Commd6	26.531	-0.266	0.751755	-0.353839	0.723459	0.794464	23.8516	9.17836	42.609	28.2443	31.1154	15.5734	29.3884	55.2884	28.5969	21.8228	40.0052	4.84294	15.8441	25.0731	Nontarget	28.4021
Rmdn3	70.4842	0.161855	0.548241	0.295227	0.76782	0.830541	93.0795	82.6052	50.5982	54.3161	52.8238	66.874	65.5117	126.374	70.6513	107.13	45.8883	36.322	60.5806	74.0252	Nontarget	19.057
Spindoc	108.824	-0.437607	0.313914	-1.39403	0.163308	0.244947	53.5207	200.088	49.2667	54.3161	59.3363	175.888	65.5117	47.3901	63.3618	163.671	65.8909	108.966	211.566	204.763	Nontarget	54.8267
Sdhaf1	36.4521	-0.688812	0.493141	-1.39678	0.162478	0.244013	33.7413	18.3567	54.5928	60.834	36.1807	14.6573	45.3072	39.4917	34.7649	13.8872	54.1247	65.3797	20.5042	18.5063	Nontarget	17.7237
Rnf166	109.938	1.26319	0.354654	3.56176	0.000368373	0.0010478	125.657	112.894	114.512	104.287	143.999	87.9439	177.555	76.3507	149.153	80.3474	167.669	50.8509	72.6967	75.2192	Nontarget	26.2469
Ttc9	8.49547	-3.26546	0.974985	-3.34924	0.000810343	0.00216135	0.581747	8.26052	2.66307	19.5538	4.34168	6.41257	4.28582	18.4295	2.80362	7.93555	5.29481	2.42147	18.6402	17.3123	Nontarget	2.60955
Dnajb14	79.8963	0.824378	0.443813	1.85749	0.0632415	0.109163	130.893	41.3026	95.8703	67.3519	128.08	37.5594	91.2266	78.9835	164.853	23.8066	111.779	84.7514	38.2124	23.8791	Nontarget	13.1432
5730507C01Rik	107.593	-1.21466	0.356023	-3.41175	0.000645483	0.00175074	68.0644	123.908	103.86	158.603	70.1905	109.014	79.5937	65.8196	75.137	92.2508	90.0117	108.966	175.218	185.66	Nontarget	60.4444
Tradd	15.0067	0.738574	0.757656	0.974815	0.329652	0.434644	24.4334	7.34269	11.9838	8.69057	20.9848	9.16082	23.8781	10.5311	14.5788	11.9033	27.0623	21.7932	11.1841	6.56675	Nontarget	4.84824
Dnajc25	58.7436	-1.76588	0.384611	-4.59133	4.40422e-06	1.65381e-05	76.7906	16.521	73.2343	117.323	68.7433	12.8251	67.3485	63.1868	58.876	18.8469	71.1857	96.8588	40.0764	40.5945	Nontarget	16.9082
Klrg2	7.07335	-1.68574	1.23693	-1.36285	0.172931	0.256287	1.74524	11.9319	0	8.69057	2.17084	6.41257	2.44904	5.26557	5.04652	18.8469	0.588312	0	16.7762	19.1033	Nontarget	5.09197
Rab11fip2	258.607	0.123558	0.291278	0.424192	0.671426	0.752283	335.668	120.236	334.215	252.027	345.887	167.643	311.64	379.121	334.192	164.663	347.692	184.032	188.266	155.214	Nontarget	23.6948
Osbp	384.203	2.04192	0.160007	12.7615	2.68994e-37	1.18861e-35	482.85	414.862	492.667	282.443	497.846	459.873	461.031	202.724	500.727	445.383	458.883	278.469	195.722	205.36	Nontarget	27.9625
Cln6	39.9258	-3.40498	0.459362	-7.41242	1.24017e-13	1.03458e-12	12.7984	31.2064	23.9676	91.251	13.7487	23.8181	17.1433	76.3507	19.0646	17.855	22.9442	108.966	41.9404	57.9068	Nontarget	15.5976
Jrkl	70.2034	-0.182929	0.584665	-0.312879	0.754373	0.819535	85.5168	23.8637	79.892	180.329	101.306	21.0699	92.4512	73.7179	98.6875	10.9114	122.369	53.2723	16.7762	22.6851	Nontarget	5.30693
C77080	128.467	-0.529858	0.391916	-1.35197	0.176385	0.260728	66.9009	176.224	51.9298	86.9057	78.8739	204.286	96.737	100.046	88.5944	202.357	95.8948	193.718	166.83	189.242	Nontarget	18.9718
Naa11	9.87469	0.638994	1.22488	0.521677	0.601895	0.694569	5.23572	14.6854	11.9838	2.17264	5.06529	13.7412	4.89807	0	4.48579	7.93555	6.47143	2.42147	31.6883	27.461	Nontarget	6.50947
Fam8a1	33.7578	-1.2657	0.49103	-2.57765	0.00994733	0.0211706	27.9239	23.8637	37.2829	60.834	39.0751	12.8251	36.7356	44.7573	33.6435	16.863	42.9468	24.2147	38.2124	33.4307	Nontarget	24.2109
Gtf3c3	313.541	1.82086	0.262882	6.92655	4.3124e-12	3.08514e-11	267.022	496.549	234.35	171.639	272.802	676.068	277.966	78.9835	265.223	614.013	236.501	147.71	305.699	345.053	Nontarget	46.4047
Znfx1	1748.26	2.41129	0.274696	8.77804	1.66351e-18	2.10016e-17	2517.22	1787.94	1889.44	884.265	2144.07	2399.22	1684.94	1240.04	2341.02	2893.5	1928.49	973.431	826.692	965.313	Nontarget	70.8881
Usp30	90.2653	0.218534	0.274379	0.796466	0.425761	0.532924	78.5359	122.99	85.2181	80.3878	63.678	134.664	75.3079	73.7179	75.137	116.057	72.9507	48.4294	120.229	116.411	Nontarget	28.754
Rpusd3	16.6903	-0.606686	0.855418	-0.709227	0.478183	0.583207	8.72621	36.7134	9.32073	2.17264	3.61807	20.1538	9.18389	10.5311	7.85014	23.8066	16.4727	26.6362	29.8243	28.6549	Nontarget	16.6474
Pls1	62.6372	1.29508	0.499899	2.59069	0.00957831	0.0204749	36.6501	126.661	45.2721	4.34528	49.2057	138.328	26.3271	18.4295	37.0078	127.961	30.5922	38.7435	109.045	88.3527	Nontarget	19.2544
Rprml	12.2588	-1.13114	0.810231	-1.39607	0.162694	0.244269	4.65398	12.8497	6.65766	15.2085	7.95975	10.0769	11.0207	34.2262	15.1396	11.9033	9.41299	7.26441	12.1161	13.1335	Nontarget	10.3865
Ttc7b	131.531	0.0762806	0.353159	0.215995	0.828992	0.878481	136.711	48.6453	155.789	199.883	186.692	51.3006	195.923	136.905	168.217	50.5891	153.549	280.89	36.3483	39.9975	Nontarget	7.14967
Slc45a4	440.406	-1.25535	0.366289	-3.42721	0.000609809	0.00166244	535.789	235.884	493.999	1110.22	353.847	157.566	344.09	771.405	374.564	268.817	420.643	554.516	263.758	280.579	Nontarget	21.1261
Itga1	40.1573	-1.34211	0.448121	-2.99496	0.0027448	0.00659887	36.6501	36.7134	30.6252	69.5246	29.6682	30.2307	26.9394	26.3278	25.2326	44.6375	32.9455	70.2226	55.9205	46.5642	Nontarget	5.81005
Mcrip1	113.279	-1.43882	0.257412	-5.58954	2.27676e-08	1.11649e-07	50.612	127.579	63.9136	147.74	70.1905	146.573	70.4098	121.108	72.8942	151.767	58.8312	154.974	169.626	179.69	Nontarget	103.436
Gm9	8.75935	2.12333	1.45174	1.46261	0.143574	0.220266	1.74524	10.0962	3.9946	0	7.95975	24.7342	6.12259	0	2.80362	15.8711	5.29481	2.42147	17.7082	23.8791	Nontarget	9.50648
Vcpkmt	39.5966	-0.773682	0.620613	-1.24664	0.212529	0.304434	20.9429	28.4529	39.946	45.6255	24.6029	52.2167	44.0827	15.7967	34.7649	37.6939	36.4753	77.487	41.9404	54.325	Nontarget	35.9261
Cfap44	17.8993	-2.2957	0.974752	-2.35517	0.0185144	0.0370378	11.6349	5.50702	19.973	54.3161	13.025	13.7412	8.57163	0	20.1861	11.9033	11.7662	29.0576	27.0283	23.8791	Nontarget	2.415
Zfp583	96.2496	1.31793	0.309818	4.25389	2.10086e-05	7.2376e-05	83.1898	150.525	71.9028	30.417	84.6628	177.72	90.0021	57.9212	93.0802	151.767	81.187	79.9085	91.3369	103.874	Nontarget	24.8061
Arfgef3	35.2037	0.455161	0.599946	0.758671	0.448049	0.555016	33.1596	51.3988	29.2937	23.8991	13.025	51.3006	18.3678	7.89835	21.8682	80.3474	30.0039	31.4791	51.2605	49.5491	Nontarget	3.7797
Mcu	38.501	0.927692	0.499096	1.85874	0.0630636	0.108913	47.7033	17.4389	42.609	30.417	54.9946	22.902	54.4911	60.554	44.2972	18.8469	64.7143	58.1153	11.1841	10.7456	Nontarget	2.63651
Stox1	32.223	0.918789	0.470636	1.95223	0.0509111	0.0903615	21.5246	52.3166	19.973	13.0359	28.9445	66.874	29.3884	23.695	21.8682	52.573	22.9442	24.2147	39.1444	34.6247	Nontarget	9.63509
Zfc3h1	1020.97	-3.67098	0.261748	-14.0249	1.09816e-44	6.82262e-43	528.808	169.8	482.015	2394.25	468.178	181.384	391.234	3596.38	536.613	187.477	524.774	4172.19	339.251	321.174	Nontarget	31.9303
March9	34.3432	-0.973416	0.501338	-1.94164	0.052181	0.0923576	16.8707	53.2345	23.9676	52.1434	23.1556	29.3146	25.7149	60.554	15.7003	54.5569	17.061	36.322	29.8243	42.3854	Nontarget	11.2283
Gls2	15.9295	1.15018	0.742506	1.54905	0.12137	0.190679	9.8897	33.9599	13.3153	15.2085	9.40698	32.9789	7.34711	2.63278	9.53231	36.7019	7.05974	0	20.5042	24.4761	Nontarget	6.19079
Slc4a7	247.633	-2.29274	0.243257	-9.42519	4.29332e-21	6.64962e-20	294.946	89.9479	237.013	414.975	245.305	93.4404	208.168	392.285	265.783	87.291	248.268	276.047	319.679	293.713	Nontarget	28.452
Pip4p1	61.1967	-0.655475	0.3654	-1.79385	0.0728365	0.123279	34.9048	97.2906	43.9406	41.2802	40.5224	105.349	27.5517	47.3901	33.6435	86.2991	31.1805	79.9085	84.8128	102.68	Nontarget	42.6281
Spata13	190.992	0.702038	0.320339	2.19155	0.0284122	0.0541944	136.711	250.569	130.49	108.632	186.692	272.076	129.799	142.17	175.507	387.85	170.022	154.974	191.994	236.403	Nontarget	17.2176
Spryd3	242.228	2.3613	0.324958	7.26648	3.6898e-13	2.94721e-12	321.124	303.804	214.377	86.9057	276.42	308.72	262.659	121.108	395.311	353.132	287.684	154.974	142.597	162.378	Nontarget	37.8236
D17Wsu92e	842.958	0.849186	0.188493	4.50513	6.63311e-06	2.43435e-05	958.719	656.253	958.703	919.028	1039.11	636.677	944.104	1229.51	1161.26	696.344	1015.43	835.407	370.007	380.872	Nontarget	61.456
Slc30a10	11.6334	-3.08369	0.857848	-3.59468	0.000324786	0.000934764	6.98097	14.6854	7.9892	32.5896	3.61807	10.993	4.89807	13.1639	4.48579	5.95166	1.76494	12.1073	16.7762	26.864	Nontarget	2.59185
Uap1l1	53.5064	1.72975	0.58697	2.94691	0.00320972	0.00761795	27.3421	90.8657	29.2937	26.0717	21.7084	143.825	35.511	0	40.9329	118.041	47.6533	21.7932	70.8327	75.2192	Nontarget	26.0988
Ddx31	163.498	1.22524	0.47842	2.56101	0.0104369	0.02211	105.878	322.16	115.843	13.0359	100.582	384.754	87.5531	78.9835	78.5014	336.269	102.366	99.2802	233.934	229.836	Nontarget	47.2103
Kiz	232.295	0.815177	0.210977	3.86382	0.00011163	0.000344885	176.269	319.407	229.024	195.538	223.597	327.957	235.72	168.498	224.85	328.333	202.968	184.032	239.526	196.406	Nontarget	76.3358
Gmps	779.013	2.15395	0.160911	13.386	7.30452e-41	3.84441e-39	764.416	1193.19	720.359	334.587	730.85	1485.88	688.792	258.013	708.755	1489.9	721.27	300.262	772.635	737.267	Nontarget	120.077
Fhdc1	37.1457	1.43931	0.572166	2.51555	0.0118848	0.024843	18.0342	67.9199	19.973	19.5538	29.6682	67.7901	33.062	21.0623	24.1111	113.082	14.7078	29.0576	36.3483	25.67	Nontarget	3.21654
Ciart	63.1065	-0.0806976	0.432705	-0.186496	0.852056	0.896313	29.0874	129.415	23.9676	34.7623	23.8792	147.489	27.5517	18.4295	20.1861	160.695	19.4143	70.2226	81.0848	97.3073	Nontarget	44.1521
Ndufb6	33.227	2.554	0.968888	2.63601	0.0083888	0.0181703	22.1064	45.8918	42.609	10.8632	35.4571	56.7971	44.0827	0	24.6719	46.6214	8.82468	0	63.3766	63.8766	Nontarget	119.092
Shb	134.076	0.416488	0.357659	1.16448	0.244228	0.341148	61.6652	313.9	67.9082	34.7623	65.8488	251.006	77.1447	81.6163	58.876	307.503	66.4792	118.652	177.082	194.615	Nontarget	46.5885
Themis2	63.3258	1.01266	0.450462	2.24805	0.0245733	0.0476529	22.6881	155.114	19.973	43.4528	42.6932	163.063	36.7356	28.9606	20.1861	159.703	30.5922	60.5367	50.3285	52.534	Nontarget	12.6623
Vsig10	163.02	-2.61393	0.343243	-7.6154	2.62882e-14	2.3232e-13	189.65	61.495	137.148	421.493	117.225	38.4754	116.942	371.222	129.527	55.5488	131.194	266.362	123.025	122.977	Nontarget	18.7704
Fbxl18	82.8638	-1.99043	0.449757	-4.42557	9.619e-06	3.46477e-05	38.9771	83.5231	59.919	121.668	56.4419	92.5243	37.9601	181.662	28.0362	106.138	28.8273	92.0158	103.453	128.947	Nontarget	24.5659
Ccdc61	157.271	1.7636	0.261437	6.74578	1.52208e-11	1.03429e-10	117.513	329.503	99.8649	49.9708	105.648	288.566	112.043	84.2491	121.677	380.906	118.251	82.33	158.441	152.826	Nontarget	53.1599
Cog7	160.522	-0.14897	0.361303	-0.412313	0.68011	0.75958	219.319	93.6193	177.094	106.459	197.546	115.426	157.351	210.623	213.636	96.2185	180.023	249.411	133.277	97.3073	Nontarget	25.3438
Tmem231	55.4701	-1.13072	0.427353	-2.64587	0.0081481	0.0177062	62.8287	48.6453	43.9406	84.733	42.6932	40.3076	40.4091	89.5146	65.044	40.6697	31.1805	79.9085	49.3965	57.3098	Nontarget	12.4368
Gucy1a2	66.1771	-1.63499	0.545158	-2.99911	0.00270769	0.00651723	73.8819	21.1102	82.555	102.114	73.8086	8.24474	80.8182	113.21	65.044	2.97583	94.7182	167.081	15.8441	25.0731	Nontarget	1.1425
Dhrsx	19.8394	-2.80319	0.61313	-4.57193	4.8325e-06	1.80316e-05	16.2889	5.50702	17.3099	41.2802	22.432	8.24474	20.2046	34.2262	12.8967	2.97583	19.4143	41.165	14.9121	20.8942	Nontarget	5.69851
Ttc38	72.8064	-1.52857	0.288869	-5.29155	1.21283e-07	5.47928e-07	48.285	64.2485	63.9136	89.0783	46.3113	73.2866	54.4911	84.2491	48.783	74.3958	47.0649	62.9582	133.277	128.947	Nontarget	22.1697
Zfp407	352.77	-0.475248	0.209253	-2.27116	0.0231375	0.0451813	340.904	323.996	288.943	341.105	325.626	405.824	265.721	318.567	334.192	387.85	298.862	254.254	567.593	485.343	Nontarget	41.2727
Cdc42bpg	127.575	0.714542	0.289649	2.46692	0.0136279	0.0280992	127.984	147.772	97.2019	126.013	114.331	176.804	111.431	113.21	115.509	216.244	123.545	77.487	107.181	131.335	Nontarget	11.2253
Lrrc55	19.1675	-2.04887	0.736033	-2.78367	0.00537485	0.0121877	9.8897	31.2064	6.65766	10.8632	7.23613	13.7412	16.531	36.859	7.28942	24.7986	5.88312	26.6362	30.7563	39.9975	Nontarget	3.75678
D430041D05Rik	38.4456	-2.13544	0.583842	-3.65757	0.000254621	0.000747136	29.6691	30.2886	21.3045	82.5604	24.6029	18.3216	18.98	39.4917	51.0259	30.7503	25.2974	50.8509	57.7845	57.3098	Nontarget	3.50827
Ralgapa2	479.114	-0.563205	0.25468	-2.21142	0.0270067	0.0518064	645.158	211.102	652.451	582.268	562.971	248.258	474.501	842.491	580.91	243.026	519.479	537.566	334.591	272.819	Nontarget	19.4241
Bank1	10.8321	-0.914584	1.06059	-0.862338	0.388502	0.496127	3.49048	18.3567	1.33153	4.34528	1.44723	13.7412	12.2452	7.89835	7.28942	21.8228	5.29481	24.2147	15.8441	14.3275	Nontarget	3.38836
Mucl3	13.7474	-1.83643	0.751918	-2.44232	0.0145931	0.0298694	9.30795	6.42485	5.32613	30.417	13.7487	8.24474	6.73485	23.695	12.3359	4.95972	9.41299	48.4294	7.45607	5.96978	Nontarget	1.81139
Washc4	642.75	-0.844064	0.190286	-4.43576	9.1748e-06	3.31343e-05	719.039	433.219	583.211	662.656	697.563	415.901	661.852	818.796	768.753	447.367	670.087	542.409	795.003	782.638	Nontarget	92.9529
Dcp1b	59.7078	0.460688	0.691876	0.665853	0.505505	0.60858	48.285	119.319	42.609	93.4236	51.3766	81.5313	39.1846	5.26557	52.7081	96.2185	30.5922	33.9006	76.4247	65.0706	Nontarget	13.6546
Itpripl2	100.083	0.125274	0.440427	0.284438	0.776075	0.836949	154.163	22.0281	138.479	154.258	124.462	11.9091	151.84	139.538	125.042	7.93555	150.02	198.56	13.9801	8.95466	Nontarget	1.06938
Zfp865	71.4235	-1.50499	0.345902	-4.35092	1.35568e-05	4.78205e-05	40.1406	54.1523	47.9352	121.668	47.0349	46.7202	42.2459	176.396	44.8579	50.5891	55.8896	188.875	49.3965	34.0277	Nontarget	7.07776
Tbc1d32	236.151	0.831218	0.281818	2.94948	0.00318305	0.007559	210.011	293.707	190.409	123.841	214.19	436.971	176.943	115.842	229.897	381.898	159.432	167.081	318.747	287.146	Nontarget	28.9515
Tmem104	46.1301	-3.58216	0.430657	-8.3179	8.95336e-17	9.93042e-16	34.3231	18.3567	23.9676	104.287	23.1556	21.986	20.2046	142.17	17.3825	21.8228	22.3558	92.0158	51.2605	52.534	Nontarget	6.46605
Rbm44	172.155	0.993905	0.299594	3.3175	0.000908256	0.00239812	91.916	340.517	62.582	60.834	88.2808	491.02	66.7363	68.4524	82.9872	392.81	89.4234	67.8011	250.71	256.103	Nontarget	46.4653
Shisa3	21.0241	-1.55634	0.57097	-2.72578	0.00641494	0.0143242	18.6159	17.4389	19.973	23.8991	20.9848	15.5734	12.8574	13.1639	13.4574	15.8711	18.826	41.165	26.0962	36.4156	Nontarget	5.66718
Thoc2	1494.96	1.73502	0.25345	6.84559	7.6161e-12	5.32869e-11	3056.5	315.736	2270.26	882.093	2728.02	440.635	2254.34	1137.36	2980.25	516.803	2643.28	1038.81	349.503	315.801	Nontarget	34.0041
Gm773	74.4057	1.84205	0.420915	4.3763	1.20713e-05	4.2938e-05	48.8668	132.168	55.9244	13.0359	48.4821	184.132	60.6137	31.5934	45.4187	128.953	50.0065	12.1073	112.773	117.605	Nontarget	125.34
Kdm7a	1906.87	0.375835	0.136929	2.74474	0.00605583	0.0135847	3381.11	442.397	3093.15	1877.16	3076.8	447.048	2738.02	1816.62	3307.15	499.94	2912.14	1932.33	574.117	598.171	Nontarget	44.7538
Gm884	93.9227	0.315115	0.490685	0.642195	0.520747	0.622981	66.9009	131.251	83.8866	52.1434	65.8488	169.475	55.1033	7.89835	73.4549	142.84	50.0065	75.0655	156.577	184.466	Nontarget	25.7652
Atxn7l1	45.1257	-0.169402	0.459494	-0.36867	0.712374	0.785579	49.4485	36.7134	38.6144	30.417	41.246	39.3915	47.7562	100.046	42.615	47.6133	38.2403	53.2723	33.5523	32.8338	Nontarget	10.5406
Garem1	72.867	1.08483	0.375567	2.88852	0.00387062	0.0090387	50.0303	101.88	45.2721	56.4887	51.3766	134.664	71.6343	44.7573	57.1939	168.63	50.0065	55.6938	68.0366	64.4736	Nontarget	8.65375
Ap5b1	20.3853	-1.28964	0.587614	-2.1947	0.0281852	0.0538234	9.8897	19.2746	26.6307	26.0717	13.7487	18.3216	16.531	28.9606	11.2145	24.7986	11.7662	19.3718	30.7563	28.0579	Nontarget	5.65291
Tmem237	67.9061	-0.701364	0.494838	-1.41736	0.156377	0.236308	75.6271	73.4269	66.5766	104.287	43.4168	53.1328	64.8995	57.9212	72.8942	65.4683	45.3	29.0576	95.9969	102.68	Nontarget	39.2668
Zfp408	98.4284	-0.874347	0.252902	-3.45725	0.000545712	0.00150302	94.8248	72.509	83.8866	136.876	91.8989	81.5313	97.3492	115.842	109.341	76.3797	84.7169	121.073	102.521	109.247	Nontarget	17.176
Gm1673	23.9762	-1.2591	0.60571	-2.07872	0.0376433	0.0692831	12.7984	29.3707	10.6523	34.7623	13.7487	33.895	15.3065	13.1639	7.85014	30.7503	21.7675	16.9503	54.0565	40.5945	Nontarget	139.727
Drc1	9.62657	0.742182	1.03448	0.717442	0.473102	0.578546	7.56271	14.6854	7.9892	26.0717	4.34168	16.4895	7.95937	0	6.72869	17.855	8.23636	2.42147	10.2521	4.17884	Nontarget	1.89433
Zbtb2	107.821	-0.242377	0.308395	-0.785933	0.431907	0.539153	70.9731	125.744	113.18	108.632	99.135	151.154	77.7569	123.741	69.5298	140.856	81.187	92.0158	116.501	139.096	Nontarget	28.3337
Foxr1	62.6161	-3.00525	0.400452	-7.50464	6.15972e-14	5.27712e-13	21.5246	67.9199	11.9838	149.912	23.1556	76.0348	24.4904	136.905	17.3825	54.5569	25.8857	87.1729	76.4247	103.277	Nontarget	39.7991
Bclaf3	392.125	2.6249	0.21569	12.1698	4.50166e-34	1.61376e-32	438.637	621.375	330.22	219.437	390.028	762.18	373.478	157.967	394.189	726.103	420.643	145.288	253.506	256.7	Nontarget	57.8346
Tmed8	133.028	-1.22655	0.235305	-5.21258	1.86231e-07	8.22025e-07	152.999	60.5772	145.137	106.459	141.105	64.1257	162.861	142.17	144.667	72.4119	165.904	106.545	193.858	203.569	Nontarget	18.3444
Myrf	101.535	-1.8397	0.640228	-2.87351	0.0040594	0.00943407	57.0112	105.551	37.2829	76.0425	39.0751	125.503	40.4091	355.426	19.0646	124.985	27.0623	283.312	61.5126	69.2494	Nontarget	6.38245
Iqgap3	42.8691	-1.23552	0.596534	-2.07117	0.0383429	0.0704217	31.9961	29.3707	42.609	41.2802	33.2862	42.1398	35.511	34.2262	19.0646	38.6858	43.5351	116.231	45.6684	46.5642	Nontarget	4.63753
Pusl1	36.6157	-0.572909	0.626515	-0.914437	0.360487	0.467065	13.9619	48.6453	17.3099	45.6255	20.9848	53.1328	36.1233	15.7967	15.7003	59.5166	32.9455	21.7932	77.3567	53.728	Nontarget	39.5368
Zfp213	89.4406	0.970039	0.350114	2.77064	0.00559464	0.0126428	55.8477	154.196	90.5442	36.9349	60.7835	139.244	59.3892	34.2262	68.4084	170.614	78.2455	62.9582	126.753	114.023	Nontarget	27.2826
Gramd2	38.1452	1.76192	0.470726	3.74299	0.000181847	0.00054521	23.8516	95.4549	18.6415	17.3811	19.5376	87.9439	26.3271	15.7967	23.5504	100.186	17.061	16.9503	30.7563	40.5945	Nontarget	5.13026
Kcnk6	36.9052	-2.69225	0.533697	-5.04453	4.5463e-07	1.92449e-06	44.7945	16.521	25.2991	56.4887	26.7737	12.8251	19.5923	73.7179	42.0543	9.91944	38.8286	60.5367	47.5324	41.7884	Nontarget	7.18215
Usp36	448.408	1.89523	0.22784	8.31825	8.92751e-17	9.9084e-16	469.47	634.225	408.781	275.926	449.364	765.844	343.477	236.95	445.776	898.701	408.877	302.684	328.999	308.637	Nontarget	32.5049
AW146154	49.9396	-0.796475	0.448494	-1.77589	0.0757513	0.127572	41.8858	45.8918	45.2721	86.9057	50.6529	48.5523	42.2459	28.9606	48.783	27.7744	55.3013	70.2226	49.3965	57.3098	Nontarget	11.7018
AW554918	228.221	-0.842174	0.223277	-3.77187	0.000162027	0.000489607	153.581	232.212	131.822	343.277	185.969	230.853	191.025	308.036	192.328	266.833	156.491	365.642	229.274	207.748	Nontarget	26.6545
Ccdc102a	51.6003	2.94456	0.631508	4.66275	3.12013e-06	1.19304e-05	57.593	23.8637	57.2559	13.0359	94.7934	32.9789	120.615	50.0229	81.8657	41.6616	86.4818	41.165	12.1161	8.95466	Nontarget	3.00902
Pgap3	12.255	-3.85949	0.921814	-4.18684	2.82868e-05	9.55968e-05	6.98097	7.34269	6.65766	34.7623	7.23613	6.41257	10.4084	13.1639	5.04652	4.95972	1.17662	9.68588	26.0962	31.6398	Nontarget	7.2396
Slc47a2	46.5898	-1.67178	0.695325	-2.40432	0.0162028	0.0328348	64.5739	11.9319	53.2613	171.639	39.0751	4.58041	22.0413	94.7802	38.1292	8.92749	32.3571	92.0158	11.1841	7.76071	Nontarget	2.61309
Il20rb	5.98673	-1.35248	1.0227	-1.32245	0.186018	0.272747	5.23572	6.42485	5.32613	0	2.89445	3.66433	6.12259	10.5311	3.36435	4.95972	6.47143	9.68588	8.38808	10.7456	Nontarget	2.67418
Dnaaf3	17.2607	-0.42006	0.652141	-0.644125	0.519494	0.621978	7.56271	34.8778	9.32073	13.0359	7.95975	28.3985	6.73485	2.63278	8.97159	27.7744	12.3545	16.9503	38.2124	26.864	Nontarget	8.93196
Lrrc8b	152.209	-1.49332	0.364812	-4.09341	4.25078e-05	0.000139909	151.836	73.4269	167.773	358.486	107.818	71.4544	104.084	365.957	148.592	86.2991	106.484	205.825	96.9289	85.9648	Nontarget	9.67816
Zdhhc6	117.908	-1.16852	0.362376	-3.2246	0.00126149	0.00323817	136.711	62.4128	134.485	238.991	125.909	59.5453	116.329	147.436	130.649	61.5005	128.252	84.7514	110.909	112.829	Nontarget	35.6236
2310061I04Rik	83.4038	-1.7745	0.289113	-6.13774	8.37063e-10	4.76354e-09	32.5778	112.894	37.2829	136.876	30.3918	120.923	38.5723	84.2491	35.3256	139.864	30.5922	101.702	133.277	133.126	Nontarget	88.2351
Zyg11b	606.038	-0.0581353	0.166159	-0.349878	0.72643	0.796985	565.458	643.403	623.157	451.91	535.474	687.978	582.871	476.534	543.342	627.9	608.903	641.689	720.443	775.474	Nontarget	48.2343
Prex2	37.9687	-0.132656	0.576574	-0.230077	0.818032	0.869331	59.3382	22.0281	39.946	43.4528	31.839	25.6503	26.9394	50.0229	62.8011	17.855	37.652	77.487	18.6402	17.9093	Nontarget	1.51329
Dnah1	42.9993	-0.661183	0.483809	-1.36662	0.171744	0.254962	15.1254	79.8517	13.3153	41.2802	17.3667	110.846	12.2452	10.5311	10.6538	99.1944	11.1779	24.2147	85.7448	70.4433	Nontarget	3.41912
Ube2u	40.9864	-0.0720967	0.580503	-0.124197	0.901159	0.930901	65.1557	18.3567	65.2451	78.2151	62.9544	8.24474	46.5317	47.3901	59.9975	3.96777	47.6533	48.4294	12.1161	9.55164	Nontarget	6.28922
Zfp872	16.5624	-2.10954	0.7579	-2.7834	0.00537926	0.0121945	18.0342	5.50702	6.65766	15.2085	14.4723	9.16082	9.79615	34.2262	21.8682	5.95166	18.2377	43.5864	13.0481	16.1184	Nontarget	3.70804
Zfp551	36.8906	-0.261066	0.450462	-0.579551	0.562217	0.659886	33.1596	51.3988	29.2937	28.2443	30.3918	46.7202	28.7762	47.3901	26.354	41.6616	19.4143	67.8011	35.4163	30.4459	Nontarget	9.492
Cpne8	42.2483	-0.124288	0.60893	-0.204108	0.838269	0.885451	45.958	40.3848	46.6036	43.4528	33.2862	21.0699	44.0827	97.413	70.6513	26.7825	40.5935	26.6362	28.8923	25.67	Nontarget	19.1276
Rps27a	2351.18	-0.25238	0.352869	-0.715223	0.474471	0.579578	1789.45	2759.01	1623.14	5114.4	2489.95	1949.42	2456.38	2680.17	2174.49	2035.47	2090.27	2457.79	1616.1	1680.49	Nontarget	2014.29
Ak8	20.4598	1.46415	0.745956	1.96278	0.0496719	0.0885711	6.39922	55.988	2.66307	10.8632	7.23613	72.3705	6.12259	0	10.6538	49.5972	8.23636	7.26441	25.1642	23.8791	Nontarget	10.8632
Adamts17	42.0489	-2.57603	0.429157	-6.00254	1.94249e-09	1.06898e-08	36.6501	34.8778	26.6307	71.6972	27.4973	21.0699	20.8168	84.2491	26.354	22.8147	30.0039	65.3797	69.9007	50.7431	Nontarget	6.04922
Thnsl2	22.2816	0.663554	0.713919	0.929452	0.352655	0.459402	19.7794	12.8497	34.6198	6.51793	18.814	19.2377	43.4704	7.89835	36.4471	15.8711	22.9442	16.9503	26.0962	30.4459	Nontarget	9.11052
Ncoa4	316.555	0.741295	0.26013	2.84971	0.00437594	0.0100987	304.254	394.669	274.296	230.3	227.938	622.936	271.231	242.216	255.69	433.479	274.153	283.312	335.523	281.773	Nontarget	52.2851
Shank1	19.6573	-2.73686	0.661926	-4.13469	3.55432e-05	0.000118469	10.4714	8.26052	10.6523	39.1076	18.814	5.49649	17.7555	57.9212	14.0181	3.96777	22.3558	38.7435	12.1161	15.5214	Nontarget	1.03528
Armc2	168.319	-4.84914	0.55866	-8.67994	3.95983e-18	4.89822e-17	78.5359	27.5351	82.555	812.568	61.5071	18.3216	114.492	213.255	109.902	17.855	105.308	491.558	109.045	114.023	Nontarget	15.1031
Gm4841	166.456	-4.66872	0.705188	-6.62054	3.5789e-11	2.3433e-10	101.806	66.0842	58.5874	530.125	54.9946	20.1538	37.9601	497.596	88.0337	7.93555	85.3052	566.624	128.617	86.5617	Nontarget	29.3179
Erich1	58.4903	1.39103	0.387049	3.59394	0.000325715	0.000936948	80.2811	45.8918	87.8812	49.9708	79.5975	36.6433	95.5124	15.7967	79.0621	49.5972	77.0688	50.8509	37.2803	33.4307	Nontarget	17.4767
Tmem136	37.6636	-3.17433	0.574867	-5.52184	3.3546e-08	1.6158e-07	30.2508	11.014	41.2775	73.8698	15.1959	5.49649	28.7762	105.311	26.354	5.95166	27.0623	118.652	19.5722	18.5063	Nontarget	3.82464
Pnldc1	124.566	-0.256801	0.366953	-0.69982	0.48404	0.588846	25.5969	256.994	35.9514	23.8991	35.4571	375.594	33.062	52.6557	24.6719	286.672	27.0623	53.2723	264.69	248.343	Nontarget	96.0254
Pm20d2	167.775	0.500639	0.211115	2.3714	0.0177206	0.0356223	184.996	163.375	199.73	145.567	194.652	147.489	171.433	202.724	192.328	140.856	188.848	191.296	119.297	106.262	Nontarget	14.1651
Shisa6	101.208	-1.69855	0.61826	-2.74731	0.00600871	0.0134845	134.965	29.3707	129.159	228.127	70.1905	18.3216	78.9814	342.262	41.4936	11.9033	83.5403	203.403	26.0962	19.1033	Nontarget	1.83508
Kbtbd6	22.7903	-0.258622	0.911773	-0.283648	0.77668	0.837493	12.7984	39.4669	23.9676	28.2443	4.34168	35.7272	7.34711	0	15.1396	43.6455	9.41299	7.26441	47.5324	44.1763	Nontarget	12.1817
Zfp936	105.068	-1.66048	0.316027	-5.25423	1.48643e-07	6.6553e-07	48.285	83.5231	51.9298	65.1793	52.8238	112.678	57.5524	47.3901	63.3618	92.2508	63.5377	33.9006	367.211	331.323	Nontarget	88.6173
Zfr2	22.3713	-0.489494	0.62075	-0.788553	0.430373	0.537714	20.9429	12.8497	17.3099	28.2443	21.7084	19.2377	26.3271	10.5311	28.0362	22.8147	18.2377	48.4294	15.8441	22.6851	Nontarget	3.46429
Zfp345	20.0698	-3.73693	0.986088	-3.78966	0.000150856	0.000457523	5.81747	7.34269	11.9838	4.34528	3.61807	21.986	11.0207	57.9212	5.60724	19.8389	3.52987	24.2147	57.7845	45.9673	Nontarget	15.1948
Zc3h12b	64.7138	-1.83944	0.356017	-5.16672	2.38233e-07	1.03935e-06	68.0644	33.0421	59.919	56.4887	69.4669	21.986	71.6343	100.046	74.0156	21.8228	78.2455	92.0158	87.6088	71.6373	Nontarget	8.59646
Sorbs1	285.311	0.911661	0.272859	3.34114	0.000834355	0.00222002	317.052	234.966	298.263	173.811	405.947	253.755	321.436	326.465	345.406	283.696	385.344	283.312	186.402	178.496	Nontarget	20.9331
Setd6	39.3088	1.33715	0.736223	1.81624	0.0693342	0.118077	30.8326	47.7275	25.2991	36.9349	43.4168	60.4614	31.2252	0	33.0827	74.3958	43.5351	2.42147	55.9205	65.0706	Nontarget	25.5404
St3gal5	450.002	-0.94144	0.431362	-2.18248	0.0290738	0.0552459	685.298	101.88	685.739	1323.14	497.846	64.1257	491.032	652.93	528.202	70.428	481.239	513.351	108.113	96.7104	Nontarget	32.4395
Zfp748	172.123	0.27662	0.213547	1.29536	0.195196	0.283773	147.764	215.691	137.148	106.459	140.381	253.755	140.207	81.6163	139.06	249.97	145.313	140.445	266.554	245.358	Nontarget	40.7155
Trpm3	145.896	-1.46732	0.432591	-3.39194	0.00069399	0.00187308	111.114	80.7696	107.854	367.177	111.436	56.7971	105.921	260.646	209.15	41.6616	147.666	300.262	76.4247	65.6675	Nontarget	8.34356
Akap2	291.342	2.07879	0.607589	3.42138	0.000623042	0.00169376	510.774	81.6874	388.808	154.258	488.439	147.489	397.969	400.183	480.541	130.937	561.249	232.461	86.6768	17.3123	Nontarget	5.03228
Nrbf2	140.346	1.48539	0.25674	5.78557	7.22686e-09	3.75333e-08	129.148	217.527	99.8649	78.2151	130.25	240.013	132.248	73.7179	128.967	232.115	142.96	60.5367	164.966	134.32	Nontarget	66.5579
Nacc2	172.384	-0.319521	0.28579	-1.11803	0.263555	0.362506	167.543	82.6052	171.768	228.127	217.808	67.7901	235.108	305.403	217.561	70.428	245.914	256.676	70.8327	75.8161	Nontarget	6.67526
Ccne2	56.6187	-2.42745	0.46363	-5.23575	1.64313e-07	7.32714e-07	31.9961	34.8778	29.2937	80.3878	55.7182	43.0558	45.9194	55.2884	23.5504	38.6858	44.1234	48.4294	125.821	135.514	Nontarget	32.7003
Tomm40l	39.6008	0.0709003	0.538905	0.131564	0.895329	0.926965	43.0493	21.1102	53.2613	26.0717	34.0098	25.6503	64.8995	23.695	72.3334	16.863	58.8312	46.0079	29.8243	38.8035	Nontarget	7.29009
Nfatc2	145.937	-0.643878	0.264734	-2.43217	0.0150085	0.0306361	161.726	64.2485	146.469	252.027	129.527	65.9579	120.615	331.731	158.685	71.4199	140.607	297.841	50.3285	51.937	Nontarget	6.02162
Slc41a3	54.9675	-1.96673	0.905627	-2.17168	0.0298796	0.0566143	52.3572	12.8497	63.9136	325.896	20.9848	5.49649	20.2046	73.7179	36.4471	4.95972	28.239	111.388	6.52406	6.56675	Nontarget	1.88203
Prok2	14.5177	1.32461	1.05067	1.26073	0.207408	0.298391	5.23572	50.481	3.9946	19.5538	8.68336	22.902	9.79615	0	6.16797	30.7503	13.5312	0	13.0481	19.1033	Nontarget	9.50548
Zfp27	70.5062	-3.1773	0.446217	-7.12053	1.07517e-12	8.17681e-12	66.3192	13.7675	79.892	91.251	95.517	11.9091	110.207	71.0851	71.7727	5.95166	78.8338	118.652	91.3369	80.592	Nontarget	16.5794
Rusc2	125.061	0.247812	0.320613	0.772933	0.439562	0.546715	94.243	172.553	98.5334	52.1434	73.085	196.958	107.145	123.741	106.538	193.429	98.8364	113.809	164.034	155.811	Nontarget	16.9983
Gm10439	135.135	2.16912	0.813525	2.66633	0.00766851	0.0167816	69.8097	260.665	117.175	56.4887	87.5572	355.44	94.2879	121.108	106.538	278.736	120.604	0	111.841	111.635	Nontarget	46.7047
Slc38a6	36.4595	-5.46762	0.522587	-10.4626	1.28284e-25	2.69037e-24	24.4334	5.50702	19.973	89.0783	20.9848	7.32866	19.5923	71.0851	17.9432	4.95972	23.5325	41.165	78.2887	86.5617	Nontarget	18.9439
Adam15	62.798	-2.4326	0.345206	-7.0468	1.83079e-12	1.36656e-11	30.8326	79.8517	33.2883	112.977	20.2612	64.1257	21.4291	92.1474	32.522	71.4199	23.5325	77.487	111.841	107.456	Nontarget	21.3957
Arnt	449.271	0.980727	0.228595	4.29023	1.78488e-05	6.19683e-05	521.827	361.627	491.336	323.724	604.217	383.838	598.79	539.721	589.321	385.866	605.373	339.006	269.351	275.804	Nontarget	40.8597
Tyw5	42.4629	-0.287125	0.484204	-0.592983	0.553193	0.65198	40.7223	45.8918	25.2991	21.7264	49.2057	36.6433	52.042	50.0229	32.522	36.7019	51.1831	50.8509	50.3285	51.3401	Nontarget	31.8692
Timm8a2	13.5035	-1.64053	0.849722	-1.93067	0.0535236	0.0944506	2.32699	25.6994	2.66307	8.69057	2.17084	14.6573	7.95937	13.1639	4.48579	25.7905	10.0013	16.9503	27.0283	27.461	Nontarget	27.7588
Prps1l3	283.271	1.15664	0.221685	5.2175	1.81355e-07	8.02215e-07	362.428	207.431	318.236	193.365	369.043	235.433	426.132	260.646	388.021	209.3	418.878	261.519	171.49	143.872	Nontarget	30.4553
Baiap2	110.429	0.864803	0.283041	3.0554	0.0022476	0.00549545	98.897	148.689	111.849	84.733	133.145	163.063	91.8389	68.4524	95.3231	140.856	104.719	62.9582	122.093	119.396	Nontarget	33.5327
Brms1l	94.8233	1.07764	1.98026	0.54419	0.586311	0.681151	186.741	48.6453	38.6144	0	316.943	32.0629	132.86	165.865	126.724	35.71	138.842	0	31.6883	72.8313	Nontarget	13.8104
Washc1	249.726	0.752806	0.209827	3.58774	0.000333558	0.000957675	174.524	371.724	162.447	180.329	209.848	469.95	193.474	229.052	199.057	447.367	187.671	181.61	233.002	256.103	Nontarget	51.185
Zdhhc12	25.7114	-3.51882	0.631429	-5.57279	2.50692e-08	1.22247e-07	17.4524	11.014	14.6469	95.5963	8.68336	10.993	13.4697	50.0229	18.5039	13.8872	11.1779	29.0576	32.6203	32.8338	Nontarget	22.8235
Tcf25	962.122	0.914923	0.15731	5.81604	6.02571e-09	3.15729e-08	791.176	1316.18	749.653	675.692	896.557	1648.03	842.469	621.337	879.776	1539.5	820.695	770.027	934.805	983.819	Nontarget	253.535
Lipt1	22.9877	1.21132	0.643667	1.88191	0.0598482	0.104045	18.0342	37.6313	22.6361	10.8632	18.814	43.9719	29.3884	7.89835	12.3359	35.71	14.1195	19.3718	30.7563	20.2972	Nontarget	13.1152
Cks1brt	12.8268	-2.92384	0.78951	-3.70336	0.000212761	0.000631482	10.4714	11.9319	5.32613	28.2443	12.3014	7.32866	6.12259	31.5934	3.36435	5.95166	4.70649	16.9503	16.7762	18.5063	Nontarget	5.6421
Lekr1	16.5467	-0.538891	0.94976	-0.567397	0.570444	0.666796	13.3802	17.4389	25.2991	21.7264	14.4723	12.8251	25.1026	0	23.5504	5.95166	6.47143	14.5288	27.0283	23.8791	Nontarget	9.05364
Zfp987	151.358	1.70579	0.539267	3.16317	0.00156062	0.00393032	109.95	205.595	193.072	73.8698	84.6628	287.65	169.596	13.1639	109.341	211.284	155.314	36.322	227.41	241.776	Nontarget	67.1524
Wdr93	13.6793	-1.28844	1.30284	-0.988946	0.32269	0.42734	6.98097	29.3707	2.66307	34.7623	6.51252	23.8181	9.79615	0	2.2429	19.8389	2.94156	0	31.6883	20.8942	Nontarget	8.14153
Gm11992	8.8265	-0.314586	0.909264	-0.345978	0.729359	0.798767	7.56271	6.42485	6.65766	10.8632	5.06529	10.0769	11.6329	0	7.28942	14.8792	6.47143	14.5288	8.38808	13.7305	Nontarget	3.25472
Dusp22	85.1015	-1.03999	0.330779	-3.14405	0.00166625	0.00416902	76.7906	67.9199	83.8866	145.567	71.6377	78.783	83.8795	89.5146	66.1655	62.4924	78.2455	82.33	84.8128	119.396	Nontarget	27.1471
Fer	281.646	0.750048	0.274946	2.72799	0.0063722	0.0142384	324.033	245.98	290.274	343.277	324.179	286.734	306.13	202.724	343.724	301.551	354.164	176.767	242.322	201.181	Nontarget	50.973
Kat2a	466.288	1.71772	0.165418	10.3841	2.92939e-25	5.97667e-24	279.239	1004.11	328.889	160.776	301.747	1090.14	274.904	192.193	283.726	1110.98	264.152	174.346	515.401	547.428	Nontarget	108.392
Grk6	141.693	0.188463	0.285925	0.659134	0.509809	0.612441	147.764	102.798	159.784	86.9057	169.326	102.601	175.718	173.764	199.057	109.114	171.199	157.395	120.229	108.053	Nontarget	26.2416
Ctsa	136.443	-4.22078	0.462183	-9.13228	6.70734e-20	9.57216e-19	99.4788	70.6734	83.8866	412.802	60.7835	45.8041	48.9807	186.928	62.2404	46.6214	62.9494	205.825	258.166	265.058	Nontarget	46.6208
Glrx2	144.228	-3.01278	0.444245	-6.7818	1.18691e-11	8.15248e-11	136.129	73.4269	113.18	267.235	137.487	30.2307	103.472	250.114	152.517	21.8228	154.726	203.403	189.198	186.257	Nontarget	39.6105
Ric3	53.0462	-3.31183	0.777305	-4.26066	2.03825e-05	7.02926e-05	87.8438	14.6854	74.5658	134.704	28.2209	6.41257	33.062	28.9606	67.2869	9.91944	42.3584	67.8011	82.9488	63.8766	Nontarget	10.8148
Sertad2	168.637	-0.902652	0.238758	-3.78062	0.00015644	0.00047359	182.669	78.9339	219.703	178.157	206.23	70.5383	210.005	273.809	207.468	68.4441	201.791	213.089	112.773	137.305	Nontarget	15.1293
Slx4ip	88.3549	-1.26744	0.52712	-2.40445	0.0161966	0.0328263	90.1708	76.1804	106.523	156.43	71.6377	50.3845	67.3485	39.4917	100.93	37.6939	98.8364	118.652	114.637	108.053	Nontarget	15.913
Zfp953	49.4843	-1.48486	0.443502	-3.34803	0.000813868	0.0021697	65.7374	21.1102	54.5928	76.0425	44.864	19.2377	49.593	34.2262	52.1474	33.7261	54.713	46.0079	81.0848	59.6978	Nontarget	11.6096
Slc16a3	126.313	-1.26361	0.716566	-1.76342	0.0778289	0.130512	138.456	22.9459	111.849	680.037	50.6529	12.8251	52.6543	210.623	65.6047	20.8308	68.8325	314.791	9.32009	8.95466	Nontarget	2.39774
Kdm3a	1045.9	2.07638	0.165921	12.5143	6.23657e-36	2.49473e-34	796.994	1987.11	742.995	399.766	773.543	2478	672.873	352.793	715.484	2514.58	687.736	372.906	1107.23	1040.53	Nontarget	147.537
Fthl17f	4.77502	-1.24577	1.95593	-0.636922	0.524176	0.626222	1.16349	7.34269	0	0	0	14.6573	0	0	0	2.97583	1.17662	0	18.6402	20.8942	Nontarget	26.5045
Gabrb3	16.172	-2.20532	0.763818	-2.88723	0.00388651	0.00907439	7.56271	15.6032	7.9892	36.9349	13.025	7.32866	9.18389	13.1639	12.8967	22.8147	5.29481	14.5288	32.6203	27.461	Nontarget	3.83713
P2rx7	30.0357	-1.47929	0.799704	-1.8498	0.0643421	0.11082	33.7413	11.014	51.9298	99.9415	15.9195	5.49649	19.5923	71.0851	29.1577	4.95972	30.5922	29.0576	10.2521	7.76071	Nontarget	2.12303
Svbp	43.1428	-1.30004	0.489503	-2.65583	0.00791133	0.0172575	23.8516	45.8918	23.9676	36.9349	27.4973	48.5523	51.4298	55.2884	28.5969	45.6294	21.7675	53.2723	64.3086	77.0101	Nontarget	71.1259
Kif5a	180.157	0.317464	0.325454	0.975451	0.329337	0.434402	98.897	269.844	74.5658	139.049	102.753	361.852	121.227	131.639	126.724	400.745	110.603	77.487	250.71	256.103	Nontarget	27.6598
Kctd21	44.9166	-1.44552	0.378457	-3.81951	0.000133714	0.000408837	31.4143	38.5491	29.2937	32.5896	28.2209	55.881	36.1233	52.6557	29.1577	38.6858	32.9455	41.165	93.2009	88.9497	Nontarget	19.1824
Pigc	46.8185	-3.17678	0.550912	-5.7664	8.09811e-09	4.19002e-08	49.4485	10.0962	43.9406	173.811	38.3515	5.49649	39.1846	92.1474	42.0543	6.94361	34.1221	70.2226	25.1642	24.4761	Nontarget	5.35839
Klhl15	235.339	0.692044	0.207743	3.33125	0.000864574	0.00229194	203.611	374.477	201.061	152.085	175.114	378.342	177.555	215.888	176.067	419.592	160.021	152.553	245.118	263.267	Nontarget	74.3195
Ldb3	8.51148	-1.75793	1.03205	-1.70333	0.088506	0.145639	6.39922	6.42485	0	10.8632	11.5778	9.16082	2.44904	5.26557	4.48579	8.92749	8.23636	14.5288	17.7082	13.1335	Nontarget	2.02132
Rbms2	538.757	-1.32864	0.18745	-7.08798	1.36081e-12	1.02548e-11	501.466	171.635	474.026	1088.49	611.453	157.566	651.444	1092.61	583.153	164.663	577.134	1031.55	208.77	228.642	Nontarget	25.3052
Mrpl1	148.209	1.26602	0.384605	3.29174	0.000995686	0.00260937	140.783	230.377	130.49	130.359	138.934	258.335	144.493	28.9606	108.22	230.131	132.958	104.123	146.325	150.438	Nontarget	48.7857
Seh1l	240.523	-0.00148199	0.177891	-0.0083309	0.993353	0.995401	226.881	209.267	267.638	234.645	278.591	218.027	244.904	268.544	247.279	228.147	245.914	268.783	222.75	205.957	Nontarget	56.6512
Sel1l	321.676	-2.75523	0.442365	-6.22841	4.71189e-10	2.76522e-09	413.622	128.497	407.449	708.281	230.109	72.3705	190.413	584.478	294.941	93.2427	287.684	365.642	370.939	355.799	Nontarget	37.4734
Negr1	21.9076	-2.08144	0.683544	-3.04507	0.0023263	0.00567193	23.2699	5.50702	14.6469	36.9349	36.1807	10.0769	16.531	21.0623	28.5969	9.91944	18.2377	26.6362	38.2124	20.8942	Nontarget	5.1509
Zkscan4	17.0647	1.81865	0.73884	2.4615	0.0138358	0.0284735	26.1786	20.1924	22.6361	19.5538	17.3667	14.6573	33.062	7.89835	22.429	11.9033	15.2961	12.1073	10.2521	5.3728	Nontarget	2.22886
Asb1	76.6323	-2.23346	0.321899	-6.9384	3.96572e-12	2.85069e-11	62.8287	40.3848	54.5928	141.222	65.1252	28.3985	74.0834	123.741	79.6228	33.7261	56.4779	164.66	74.5607	73.4282	Nontarget	7.67832
Hnrnpa1	1814.37	1.94567	0.295737	6.57905	4.73479e-11	3.05892e-10	1898.82	2156.91	2282.25	1861.95	2531.2	1807.43	2609.45	1197.92	1920.48	2126.73	2297.36	920.158	842.536	948	Nontarget	348.003
Clip2	177.466	0.49923	0.301756	1.65442	0.0980429	0.158864	136.711	278.104	109.186	71.6972	112.884	303.223	145.718	168.498	111.023	341.229	129.429	121.073	234.866	220.882	Nontarget	27.073
Eif4e2	516.994	0.833915	0.192319	4.3361	1.45032e-05	5.09957e-05	507.865	527.756	507.314	504.053	584.68	493.768	626.341	429.144	620.722	541.601	622.434	617.475	331.795	322.965	Nontarget	77.6958
Cep350	1244.47	-0.156592	0.174427	-0.897751	0.369318	0.476304	1678.34	562.633	1703.03	1344.87	1497.16	708.131	1499.42	1482.26	1752.26	699.32	1488.43	1295.49	950.649	760.549	Nontarget	40.491
Zfhx2	204.487	-0.969752	0.281925	-3.43975	0.000582247	0.00159414	184.414	130.333	252.991	260.717	179.456	147.489	187.351	410.714	168.778	157.719	169.434	268.783	179.878	164.766	Nontarget	11.0709
Emc1	164.071	-3.64594	0.429046	-8.49779	1.93232e-17	2.28097e-16	161.726	66.0842	189.078	330.242	85.3864	49.4684	91.8389	234.318	110.463	40.6697	100.601	249.411	296.379	291.325	Nontarget	28.86
Hdhd2	263.867	1.6905	0.221285	7.63946	2.18128e-14	1.93702e-13	363.592	160.621	459.379	195.538	412.46	169.475	379.601	244.849	382.975	175.574	340.044	225.197	100.657	84.1738	Nontarget	30.6366
Zfp982	58.7679	-0.868788	0.51922	-1.67325	0.0942773	0.153712	53.5207	15.6032	86.5496	89.0783	73.8086	14.6573	103.472	73.7179	63.9226	14.8792	118.839	50.8509	29.8243	34.0277	Nontarget	22.4603
Zfp951	122.436	0.0807564	0.44054	0.183313	0.854553	0.898482	64.5739	182.649	74.5658	91.251	66.5724	232.685	127.962	44.7573	70.0905	175.574	63.5377	46.0079	240.458	233.418	Nontarget	65.3567
Zfp808	136.413	-0.845409	0.381952	-2.21339	0.0268708	0.0515891	184.414	40.3848	226.361	95.5963	142.552	56.7971	173.882	57.9212	205.225	40.6697	222.382	142.867	171.49	149.244	Nontarget	46.2155
March10	16.3204	0.711737	0.880977	0.807895	0.419151	0.526318	11.0532	33.9599	14.6469	23.8991	7.95975	28.3985	12.8574	10.5311	15.1396	29.7583	4.70649	0	24.2322	11.3426	Nontarget	6.06448
Tmem267	12.0398	0.143085	1.42184	0.100634	0.919841	0.944473	12.2167	7.34269	6.65766	8.69057	21.7084	6.41257	0.612259	34.2262	35.3256	8.92749	10.5896	2.42147	7.45607	5.96978	Nontarget	3.69116
Kcnd3	208.081	-1.75712	0.307698	-5.71052	1.1263e-08	5.72012e-08	241.425	55.0702	201.061	438.874	233.727	30.2307	244.291	450.206	268.587	55.5488	193.555	319.634	84.8128	96.1134	Nontarget	10.7117
Nolc1	909.755	3.3242	0.281449	11.811	3.42363e-32	1.08806e-30	1147.21	1299.66	900.116	223.782	1103.51	1543.6	990.636	452.839	1095.09	1658.53	1030.72	464.922	404.492	421.466	Nontarget	69.8595
Mobp	34.8681	-0.901126	0.626426	-1.43852	0.150286	0.228801	15.7072	68.8377	14.6469	63.0066	10.1306	64.1257	15.9187	10.5311	24.1111	49.5972	12.9429	58.1153	42.8724	37.6096	Nontarget	12.3481
Polr2k	50.627	1.17229	0.700274	1.67405	0.0941205	0.153532	39.5588	73.4269	26.6307	10.8632	57.8891	87.0278	58.1646	2.63278	47.1008	46.6214	62.361	46.0079	69.9007	80.592	Nontarget	159.751
Slc22a15	37.7003	-4.45928	0.7197	-6.19603	5.79053e-10	3.36063e-09	26.1786	12.8497	21.3045	108.632	11.5778	5.49649	11.0207	89.5146	24.6719	0.991944	28.8273	133.181	26.0962	27.461	Nontarget	2.60647
Nsmf	169.115	-0.795503	0.200072	-3.97608	7.00603e-05	0.000222871	131.475	172.553	137.148	197.71	143.999	173.139	129.799	244.849	139.06	177.558	139.43	174.346	220.886	185.66	Nontarget	41.4831
Rab43	68.044	0.128798	0.582155	0.221244	0.824902	0.874989	74.4636	59.6593	63.9136	45.6255	78.8739	62.2936	31.2252	68.4524	105.416	61.5005	95.8948	65.3797	43.8044	96.1134	Nontarget	8.61876
Trim46	13.0294	-0.678504	0.915148	-0.741415	0.458442	0.564757	5.23572	22.0281	6.65766	4.34528	4.34168	21.986	12.8574	21.0623	6.72869	19.8389	5.29481	19.3718	26.0962	6.56675	Nontarget	3.39225
Kif21b	315.403	1.38343	0.317467	4.35772	1.31423e-05	4.65074e-05	355.447	129.415	371.498	297.652	480.479	219.86	432.255	487.065	441.851	205.332	477.121	358.377	81.0848	78.2041	Nontarget	4.8361
Klhl20	173.686	0.942537	0.250356	3.76478	0.000166697	0.000502339	149.509	244.144	162.447	99.9415	183.798	244.594	149.391	163.233	136.817	298.575	146.49	121.073	166.83	164.766	Nontarget	26.4978
Kcnj10	26.3416	-4.47316	0.692392	-6.46044	1.044e-10	6.49347e-10	13.9619	11.014	13.3153	73.8698	6.51252	3.66433	12.2452	55.2884	16.261	1.98389	12.3545	108.966	21.4362	17.9093	Nontarget	2.3019
Piezo2	77.7818	-1.84829	0.319975	-5.77636	7.63341e-09	3.95578e-08	69.8097	52.3166	77.2289	89.0783	70.9141	44.888	50.2053	144.803	65.6047	43.6455	65.3026	128.338	97.8609	88.9497	Nontarget	5.36599
Lrif1	124.618	0.623204	0.294188	2.11839	0.0341424	0.0637052	155.326	74.3447	173.099	123.841	172.22	72.3705	186.739	97.413	195.132	67.4522	192.966	53.2723	88.5408	91.9345	Nontarget	26.9329
Plekhm3	207.905	-0.0225461	0.207617	-0.108595	0.913524	0.940031	204.193	200.088	229.024	184.675	184.521	201.538	228.373	168.498	232.701	199.381	200.026	242.147	213.43	222.076	Nontarget	15.8094
Adora1	756.205	2.81819	0.373649	7.54234	4.616e-14	3.98975e-13	1134.99	125.744	1047.92	1707.7	858.929	96.1886	805.733	1642.86	858.469	101.178	883.056	1305.17	11.1841	7.76071	Nontarget	1.02133
Dhps	73.0241	0.669047	0.377714	1.77131	0.0765098	0.128627	40.1406	138.593	47.9352	36.9349	62.2308	146.573	44.0827	28.9606	44.2972	102.17	51.1831	26.6362	131.413	121.186	Nontarget	70.9528
Arl4a	246.261	1.10175	0.338274	3.25697	0.00112608	0.00292052	314.143	190.91	303.589	232.473	361.083	184.132	366.743	100.046	400.918	166.647	325.925	104.123	219.022	177.899	Nontarget	42.4604
Rrn3	314.474	0.827744	0.202452	4.08858	4.34015e-05	0.000142709	297.855	345.106	312.91	169.466	306.812	484.607	285.313	157.967	321.295	407.689	307.099	196.139	387.716	422.66	Nontarget	79.414
Leo1	553.78	3.98017	0.25192	15.7994	3.14335e-56	3.50993e-54	1013.4	293.707	876.148	184.675	1031.87	363.685	892.062	300.137	1083.32	380.906	896.587	263.94	97.8609	74.6222	Nontarget	26.9064
Parp14	131.511	1.45153	0.381756	3.80223	0.000143399	0.000436188	135.547	202.842	103.86	58.6613	112.16	235.433	78.3692	100.046	128.406	272.785	92.3649	96.8588	136.073	87.7557	Nontarget	9.85285
Pstk	52.7756	-0.145707	0.411528	-0.354064	0.723291	0.794366	26.1786	103.715	25.2991	45.6255	28.9445	92.5243	34.8988	36.859	25.2326	90.2669	28.239	12.1073	107.181	81.7859	Nontarget	77.9368
Pigl	21.445	0.217296	0.644385	0.337215	0.735955	0.804604	20.9429	22.0281	33.2883	15.2085	28.2209	17.4056	17.1433	13.1639	15.7003	16.863	30.5922	31.4791	14.9121	23.2821	Nontarget	10.6703
Myo6	366.785	2.00806	0.308331	6.51267	7.38265e-11	4.66561e-10	717.876	179.896	605.847	345.45	549.223	192.377	446.949	213.255	642.029	253.938	499.477	273.626	109.977	105.068	Nontarget	8.75785
Rad54b	122.491	0.458988	0.345129	1.3299	0.18355	0.269775	87.2621	178.978	73.2343	73.8698	57.8891	226.272	101.023	113.21	106.538	221.203	94.1299	72.6441	159.373	149.244	Nontarget	37.5008
Ankrd37	16.5229	-0.249544	0.830453	-0.300492	0.763802	0.82706	11.0532	28.4529	9.32073	15.2085	15.1959	12.8251	25.7149	5.26557	15.7003	12.8953	11.1779	31.4791	23.3002	13.7305	Nontarget	20.7047
Abca3	101.33	-3.51152	0.461725	-7.6052	2.84454e-14	2.50581e-13	52.939	71.5912	71.9028	223.782	44.864	65.9579	33.6743	84.2491	41.4936	62.4924	42.3584	104.123	261.894	257.297	Nontarget	23.8453
Edem3	228.324	-1.99289	0.327243	-6.08994	1.12954e-09	6.33416e-09	298.436	82.6052	292.937	499.708	208.401	74.2026	192.249	292.239	229.336	69.4361	251.209	305.105	192.926	207.748	Nontarget	21.3366
Tesmin	8.64782	1.23549	1.27627	0.968045	0.333022	0.438423	4.65398	30.2886	1.33153	4.34528	2.17084	16.4895	0	0	4.48579	23.8066	7.05974	4.84294	10.2521	11.3426	Nontarget	3.27946
Iffo1	107.863	2.38083	0.475006	5.01221	5.38072e-07	2.25862e-06	165.216	110.14	134.485	63.0066	151.959	114.51	128.574	23.695	155.881	128.953	128.252	99.2802	72.6967	33.4307	Nontarget	11.4846
Slc30a2	129.01	-1.27907	0.471749	-2.71133	0.00670143	0.0148906	166.961	37.6313	113.18	349.795	144.723	17.4056	121.227	352.793	142.985	22.8147	124.134	152.553	28.8923	31.0428	Nontarget	5.83677
Mks1	43.6078	-0.586762	0.38911	-1.50796	0.131565	0.204443	33.1596	46.8096	31.9568	52.1434	32.5626	54.9649	28.1639	89.5146	36.4471	52.573	30.0039	38.7435	42.8724	40.5945	Nontarget	11.1304
Arhgap12	420.171	0.385259	0.176707	2.18021	0.0292415	0.0555199	460.162	279.94	493.999	504.053	450.088	360.936	529.604	437.042	521.474	339.245	487.122	510.93	268.419	239.388	Nontarget	34.8858
Rhox4g	3.02839	1.80851	1.95185	0.92656	0.354155	0.460775	0	6.42485	0	0	2.89445	5.49649	0.612259	0	2.80362	5.95166	4.11818	0	9.32009	4.77582	Nontarget	5.70013
Tmem120b	22.9894	-2.64982	0.789773	-3.35517	0.000793161	0.00211997	10.4714	18.3567	7.9892	30.417	7.23613	41.2237	7.95937	0	5.04652	20.8308	9.41299	29.0576	71.7647	62.0857	Nontarget	23.4812
Asxl1	1310.53	0.685025	0.185048	3.70187	0.000214014	0.000634745	1054.13	1801.71	946.72	1188.44	1076.74	2294.79	975.329	1540.18	1045.19	2220.96	1024.25	1058.18	1035.46	1085.31	Nontarget	91.1405
Zfp869	125.988	0.0932309	0.33665	0.276937	0.781828	0.841462	126.239	93.6193	154.458	86.9057	120.12	122.755	154.902	144.803	146.91	137.88	107.073	75.0655	144.461	148.647	Nontarget	28.7209
Rnf213	1219.66	0.0296389	0.263855	0.11233	0.910562	0.93797	2056.48	298.297	2027.92	1753.32	1541.3	287.65	1301.05	2064.1	1633.95	356.108	1593.74	1581.22	331.795	248.343	Nontarget	10.1577
Sco1	71.1332	-0.537714	0.459761	-1.16955	0.242182	0.339063	98.897	33.0421	67.9082	119.495	86.8336	31.1468	94.9002	31.5934	91.3981	45.6294	98.2481	67.8011	61.5126	67.4585	Nontarget	10.2933
Arap1	262.075	1.73576	0.274044	6.33385	2.39111e-10	1.43954e-09	352.539	125.744	360.845	202.056	397.987	158.482	401.642	318.567	358.303	196.405	420.055	227.618	80.1528	68.6524	Nontarget	7.1529
Selenot	614.708	0.0167774	0.286273	0.0586064	0.953266	0.967729	966.864	110.14	1039.93	814.741	967.471	84.2795	1151.05	418.613	992.482	82.3313	1077.2	593.26	139.801	167.751	Nontarget	34.1624
Setd1b	588.846	0.38133	0.326259	1.16879	0.242487	0.339231	631.777	317.571	652.451	647.447	613.624	343.531	617.77	1513.85	646.515	423.56	604.196	888.679	164.966	177.899	Nontarget	11.1903
Larp1b	83.2338	3.37838	0.420587	8.03255	9.54661e-16	9.70876e-15	80.8628	175.307	79.892	17.3811	82.4919	141.077	71.6343	36.859	94.7624	203.348	56.4779	21.7932	48.4645	54.9219	Nontarget	23.108
Tet2	268.031	-0.0501382	0.24871	-0.201593	0.840235	0.887153	357.193	50.481	348.862	443.219	364.701	43.9719	348.376	508.127	372.321	70.428	387.109	363.22	48.4645	45.9673	Nontarget	3.29012
Thsd4	77.4633	-2.64724	0.32813	-8.06765	7.16614e-16	7.38327e-15	52.3572	73.4269	31.9568	106.459	42.6932	54.9649	30.613	105.311	49.9045	63.4844	44.7117	99.2802	162.17	167.154	Nontarget	11.2766
Tacc3	409.194	2.16738	0.274358	7.89982	2.79298e-15	2.71032e-14	254.805	842.573	263.643	121.668	281.486	930.739	331.845	184.295	233.822	998.887	355.34	150.131	338.319	441.166	Nontarget	94.6772
Rspo4	63.2038	-2.42402	0.442207	-5.48165	4.21371e-08	2.00853e-07	26.1786	82.6052	25.2991	102.114	32.5626	61.3775	40.4091	42.1245	21.8682	61.5005	24.1208	58.1153	145.393	161.184	Nontarget	40.6274
Rap1gds1	273.559	0.659923	0.208291	3.16827	0.00153348	0.00386668	240.843	313.9	250.328	204.228	328.521	322.461	300.619	202.724	265.783	336.269	287.684	261.519	260.03	254.909	Nontarget	49.1153
Uevld	101.751	-0.315384	0.302919	-1.04115	0.297806	0.400158	137.292	77.0982	129.159	108.632	102.03	69.6222	124.901	131.639	109.902	58.5247	108.838	75.0655	88.5408	103.277	Nontarget	14.321
Mtmr7	132.594	0.541232	0.315999	1.71276	0.0867562	0.14317	54.6842	291.872	54.5928	69.5246	62.2308	315.132	75.3079	39.4917	49.3437	289.648	48.8299	41.165	214.362	250.134	Nontarget	47.1398
Pex10	12.8548	-1.24798	0.683293	-1.82641	0.0677878	0.11578	5.23572	14.6854	10.6523	8.69057	8.68336	12.8251	11.6329	10.5311	8.97159	13.8872	7.64805	12.1073	25.1642	29.2519	Nontarget	11.3554
Kntc1	137.823	-0.554268	0.370982	-1.49406	0.135161	0.20936	86.0986	130.333	119.838	80.3878	82.4919	220.776	77.1447	126.374	74.0156	214.26	108.249	77.487	262.826	269.237	Nontarget	23.7999
Zhx1	374.757	1.72805	0.233048	7.41502	1.21605e-13	1.016e-12	549.169	165.21	515.303	319.378	660.659	136.496	699.812	318.567	662.776	170.614	587.723	266.362	104.385	90.1436	Nontarget	13.5949
Txnrd1	354.531	1.83511	0.208947	8.78269	1.59607e-18	2.01657e-17	454.344	394.669	460.71	165.121	467.454	474.53	383.887	236.95	389.703	415.624	404.759	225.197	230.206	260.282	Nontarget	46.9841
Cacna1b	69.2943	-3.66353	0.439803	-8.32992	8.08942e-17	9.01455e-16	45.3763	33.0421	43.9406	71.6972	28.9445	27.4825	26.3271	57.9212	57.7546	23.8066	45.8883	75.0655	237.662	195.212	Nontarget	13.8323
Akap1	155.83	-1.94858	0.328763	-5.92702	3.0849e-09	1.66932e-08	137.874	152.361	106.523	167.293	102.03	140.161	91.2266	102.679	75.6978	116.057	87.0701	142.867	391.444	368.335	Nontarget	60.8038
Rpf2	118.463	2.02784	0.327898	6.18436	6.23531e-10	3.59542e-09	123.33	145.018	125.164	58.6613	153.406	150.237	130.411	15.7967	141.303	140.856	161.786	26.6362	142.597	143.275	Nontarget	75.521
Apaf1	100.614	-0.463939	0.253236	-1.83204	0.0669453	0.114563	87.8438	92.7014	93.2073	84.733	107.095	92.5243	86.9408	105.311	88.5944	104.154	102.955	113.809	123.957	124.768	Nontarget	12.4645
Selenop	431.838	-1.75418	0.440954	-3.97814	6.94575e-05	0.000221124	325.197	109.222	456.716	1835.88	335.757	82.4474	349.6	853.022	363.91	63.4844	276.507	820.878	106.249	66.8615	Nontarget	33.7616
Phc1	518.63	1.62861	0.169368	9.61585	6.85391e-22	1.12704e-20	406.641	822.381	435.411	382.385	432.721	920.662	511.237	358.059	454.747	1012.77	447.117	336.584	361.619	378.484	Nontarget	55.1471
Clk1	156.439	-0.104472	0.430137	-0.24288	0.808098	0.8617	204.775	64.2485	231.687	136.876	191.758	70.5383	216.128	55.2884	266.344	99.1944	181.788	186.453	160.306	124.768	Nontarget	62.0822
Dcun1d2	94.1908	-0.489366	0.335211	-1.45987	0.144325	0.221212	81.4446	53.2345	114.512	80.3878	117.225	50.3845	122.452	97.413	127.845	55.5488	117.074	142.867	78.2887	79.995	Nontarget	19.6157
Oip5	21.779	-1.64613	0.599797	-2.74447	0.00606087	0.0135923	11.6349	22.9459	9.32073	21.7264	12.3014	27.4825	16.531	18.4295	5.60724	24.7986	18.2377	21.7932	47.5324	46.5642	Nontarget	26.1236
Tbc1d17	87.691	0.0821347	0.373151	0.220111	0.825785	0.875532	89.5891	94.5371	105.191	106.459	83.9392	87.0278	81.4305	44.7573	91.3981	107.13	60.0078	77.487	89.4728	109.247	Nontarget	23.8333
Rbpms	238.782	0.609488	0.242184	2.51663	0.0118483	0.0247792	264.113	118.401	327.557	230.3	391.475	112.678	351.437	239.583	322.977	132.92	366.518	266.362	109.977	108.65	Nontarget	55.6744
Drc7	7.07629	-0.782967	1.17796	-0.664681	0.506254	0.609171	1.74524	11.9319	1.33153	0	2.89445	14.6573	4.28582	18.4295	7.85014	6.94361	2.94156	12.1073	5.59205	8.35769	Nontarget	1.57164
Neo1	519.535	-3.25638	0.561767	-5.79667	6.76432e-09	3.52419e-08	710.313	183.567	627.152	1707.7	342.993	92.5243	289.599	642.399	320.734	113.082	404.17	770.027	526.585	542.653	Nontarget	46.4107
Map6	64.8809	1.0085	0.329347	3.06211	0.00219785	0.00538417	65.7374	85.3587	57.2559	47.7981	74.5322	79.6991	68.573	78.9835	66.7262	76.3797	60.0078	60.5367	50.3285	36.4156	Nontarget	7.48109
Zfp2	21.6832	0.0225054	0.695452	0.0323609	0.974184	0.983108	30.2508	4.58918	35.9514	30.417	21.7084	7.32866	39.7969	36.859	30.8398	4.95972	30.0039	19.3718	3.72803	7.76071	Nontarget	1.34121
Zfp41	82.0662	-1.27986	0.458241	-2.79299	0.00522235	0.0118746	55.8477	77.0982	73.2343	84.733	52.8238	53.1328	90.0021	184.295	53.2688	70.428	78.2455	96.8588	72.6967	106.262	Nontarget	15.1159
Gcdh	56.6209	1.29118	0.398351	3.2413	0.00118987	0.00306864	94.243	30.2886	85.2181	49.9708	91.8989	37.5594	80.206	10.5311	91.3981	31.7422	81.187	38.7435	34.4843	35.2217	Nontarget	11.7718
Zfp68	298.739	1.14022	0.221114	5.15672	2.51311e-07	1.09323e-06	269.931	379.984	358.182	249.854	337.928	400.328	354.498	184.295	272.512	348.172	316.512	203.403	248.846	257.894	Nontarget	39.3062
Mapk1ip1	36.5812	-0.704201	0.426757	-1.65012	0.0989181	0.160094	31.4143	23.8637	19.973	49.9708	31.839	38.4754	35.511	57.9212	35.8864	37.6939	35.887	43.5864	37.2803	32.8338	Nontarget	16.0098
Zfp180	93.2434	-0.626718	0.28459	-2.20218	0.0276527	0.0529044	87.8438	44.0561	111.849	134.704	98.4114	49.4684	114.492	139.538	100.93	44.6375	115.309	162.238	49.3965	52.534	Nontarget	8.33398
Raph1	177.347	-0.388986	0.284934	-1.36518	0.172197	0.255474	119.84	225.788	138.479	128.186	143.999	237.265	140.207	221.154	95.3231	267.825	121.781	208.246	209.702	225.061	Nontarget	15.5028
Proca1	39.6064	0.999539	0.781387	1.27919	0.200832	0.29055	45.3763	10.0962	39.946	84.733	70.9141	5.49649	72.2466	13.1639	74.0156	11.9033	62.361	53.2723	5.59205	5.3728	Nontarget	2.62731
Cep126	50.3938	-1.63057	0.431097	-3.78237	0.000155344	0.000470446	41.304	36.7134	42.609	58.6613	60.0599	28.3985	52.6543	86.8818	49.3437	28.7664	33.5338	38.7435	70.8327	77.0101	Nontarget	14.5946
Cyb5d1	22.8158	-0.931067	0.650658	-1.43096	0.152441	0.231492	26.1786	8.26052	33.2883	36.9349	33.2862	7.32866	32.4497	5.26557	21.3075	12.8953	32.9455	14.5288	26.0962	28.6549	Nontarget	39.5754
Fkbp15	305.556	1.8623	0.343731	5.4179	6.03015e-08	2.82547e-07	456.671	191.828	379.487	121.668	435.615	264.748	405.316	239.583	459.233	326.349	425.938	285.733	143.529	142.081	Nontarget	19.7129
Spata22	18.7931	-0.303499	0.852302	-0.356093	0.721771	0.793084	11.0532	33.9599	5.32613	4.34528	3.61807	49.4684	4.89807	26.3278	8.41086	32.7341	11.7662	2.42147	33.5523	35.2217	Nontarget	24.386
March4	19.6844	-2.45708	0.776229	-3.16541	0.00154863	0.00390311	18.6159	16.521	18.6415	43.4528	12.3014	1.83216	9.18389	42.1245	15.1396	5.95166	20.5909	36.322	22.3682	12.5365	Nontarget	2.49347
Zzef1	333.464	-0.330654	0.275326	-1.20095	0.229769	0.324377	332.178	290.036	294.269	373.694	249.647	437.887	226.536	289.606	311.763	420.584	280.036	382.592	426.86	352.814	Nontarget	20.2285
Xlr5a	118.939	0.669651	0.712151	0.940321	0.347053	0.453286	21.5246	311.146	42.609	19.5538	34.0098	292.23	60.6137	55.2884	27.4755	250.962	28.8273	0	260.03	260.879	Nontarget	121.578
Zfp952	52.2369	-0.353368	0.386817	-0.913529	0.360964	0.467646	50.612	32.1243	58.5874	80.3878	54.9946	51.3006	58.7769	71.0851	40.3721	43.6455	55.8896	48.4294	39.1444	45.9673	Nontarget	10.9901
Rbm15	322.833	0.163287	0.169165	0.965257	0.334416	0.439764	281.566	413.026	262.312	189.02	284.38	428.726	289.599	279.075	267.465	409.673	292.979	285.733	404.492	431.615	Nontarget	80.0731
Nelfe	149.687	0.639786	0.275517	2.32213	0.0202261	0.0400642	114.604	237.719	99.8649	60.834	117.225	246.426	146.942	73.7179	95.3231	226.163	115.897	89.5944	228.342	242.97	Nontarget	108.231
Mink1	958.367	2.35798	0.302326	7.79946	6.21751e-15	5.8514e-14	781.868	1765.92	782.941	236.818	893.663	1880.72	798.998	581.845	776.603	2278.49	729.507	411.65	761.451	736.67	Nontarget	89.0902
Ttc21b	391.829	2.39861	0.265072	9.04888	1.44441e-19	1.99919e-18	309.489	646.156	290.274	108.632	285.827	1042.5	280.415	76.3507	284.287	872.91	281.801	135.602	451.092	420.272	Nontarget	63.3331
Syce1l	36.9164	1.28867	0.549636	2.34459	0.0190483	0.0379541	16.2889	71.5912	19.973	23.8991	33.2862	95.2725	23.8781	18.4295	21.3075	79.3555	16.4727	4.84294	45.6684	46.5642	Nontarget	44.3095
Zgpat	109.3	0.610591	0.255304	2.39163	0.0167739	0.0338923	115.186	131.251	106.523	73.8698	112.884	117.258	103.472	118.475	119.434	127.961	118.251	82.33	92.2689	111.038	Nontarget	30.5522
Ghr	42.3103	-1.93905	0.733183	-2.6447	0.00817642	0.0177607	43.0493	9.17836	57.2559	76.0425	68.0197	5.49649	41.0214	134.272	58.3153	2.97583	38.8286	29.0576	12.1161	16.7154	Nontarget	5.32615
Zfp455	16.7824	0.319125	0.700138	0.455803	0.648532	0.733984	13.3802	21.1102	15.9784	8.69057	18.814	17.4056	21.4291	0	16.8217	15.8711	11.1779	14.5288	31.6883	28.0579	Nontarget	9.08056
Lyrm9	45.5984	-3.66134	0.440861	-8.30497	9.98456e-17	1.10371e-15	41.8858	10.0962	34.6198	123.841	27.4973	8.24474	37.9601	115.842	34.2042	6.94361	35.2987	94.4373	31.6883	35.8187	Nontarget	4.12702
Zfp874b	65.5522	-1.89493	0.357263	-5.304	1.1329e-07	5.13785e-07	38.3953	63.3307	39.946	84.733	57.1655	48.5523	57.5524	57.9212	41.4936	51.5811	42.9468	72.6441	144.461	117.008	Nontarget	26.4784
Bsg	472.144	-2.91036	0.493196	-5.90102	3.61264e-09	1.93902e-08	744.636	151.443	553.918	1153.67	398.711	69.6222	283.476	755.609	490.073	102.17	421.231	523.037	481.849	480.567	Nontarget	241.639
Gsta3	52.5954	1.64694	0.429156	3.83763	0.000124227	0.000381311	79.1176	26.6172	77.2289	21.7264	94.0698	24.7342	82.0427	21.0623	94.7624	23.8066	102.955	24.2147	33.5523	30.4459	Nontarget	18.3843
Nexmif	340.478	2.47286	0.322635	7.66457	1.79436e-14	1.61161e-13	607.344	47.7275	580.548	325.896	574.549	63.2097	594.504	444.94	500.727	65.4683	642.436	283.312	20.5042	15.5214	Nontarget	1.14663
Nrp2	79.0952	-1.51225	0.439944	-3.43738	0.000587379	0.00160579	92.4978	25.6994	61.2505	171.639	60.0599	21.986	53.2666	213.255	98.1267	21.8228	56.4779	181.61	25.1642	24.4761	Nontarget	2.40322
Pik3r1	329.221	1.12089	0.184365	6.07972	1.20389e-09	6.73284e-09	480.523	152.361	450.058	293.307	524.62	144.741	470.215	389.652	487.269	154.743	501.242	365.642	101.589	93.1285	Nontarget	9.81105
Scn8a	46.1453	-1.63202	0.487005	-3.35114	0.000804782	0.00214756	36.0683	55.0702	26.6307	49.9708	37.6279	37.5594	23.2659	97.413	43.1758	35.71	22.9442	53.2723	65.2406	62.0857	Nontarget	3.3517
Slc1a2	33.4813	-4.11153	0.438926	-9.36724	7.44532e-21	1.14033e-19	20.3611	14.6854	17.3099	43.4528	16.6431	13.7412	18.98	71.0851	20.7468	9.91944	17.6494	55.6938	79.2207	69.2494	Nontarget	6.25267
Nme2	318.154	-0.677251	0.244963	-2.76471	0.00569735	0.0128416	228.045	337.764	215.708	260.717	295.958	356.356	301.844	323.832	255.69	322.382	281.213	418.914	402.628	453.106	Nontarget	524.308
Prmt2	116.291	0.653651	0.315883	2.06928	0.0385199	0.0707157	86.0986	173.471	86.5496	63.0066	103.477	199.706	102.86	142.17	94.7624	177.558	81.7753	108.966	89.4728	118.202	Nontarget	33.8762
Urgcp	167.643	0.519312	0.259033	2.00481	0.0449832	0.081121	145.437	219.363	125.164	141.222	138.21	267.496	140.82	197.459	129.527	247.986	162.962	101.702	163.102	166.557	Nontarget	17.7631
Ccdc173	60.7299	1.30175	0.549582	2.36861	0.017855	0.0358685	79.1176	12.8497	77.2289	80.3878	87.5572	26.5664	100.411	44.7573	98.1267	42.6536	73.539	101.702	13.9801	11.3426	Nontarget	5.83609
Fmnl1	68.7443	-0.241601	0.400874	-0.602685	0.546718	0.646516	42.4675	105.551	35.9514	41.2802	46.3113	118.175	44.0827	105.311	30.8398	108.122	54.1247	82.33	79.2207	68.6524	Nontarget	12.317
Tcf7l1	145.225	1.54878	0.349394	4.43275	9.3039e-06	3.35566e-05	117.513	187.239	146.469	110.805	172.22	152.986	160.412	184.295	159.246	153.751	149.431	244.568	42.8724	51.3401	Nontarget	9.70895
Hnrnph3	330.363	3.45237	0.220867	15.631	4.47779e-55	4.74359e-53	488.086	312.064	402.123	152.085	517.384	332.538	525.931	118.475	499.045	385.866	525.362	140.445	114.637	111.038	Nontarget	39.7928
Hoxb3	11.1591	0.521998	0.922859	0.565631	0.571644	0.667774	9.30795	22.0281	9.32073	0	5.06529	10.0769	11.0207	7.89835	5.04652	22.8147	10.5896	16.9503	11.1841	14.9244	Nontarget	2.45629
Bcl11b	38.408	0.0202726	0.617247	0.0328436	0.973799	0.982899	33.1596	24.7816	42.609	32.5896	57.1655	39.3915	38.5723	65.8196	20.1861	33.7261	32.3571	75.0655	27.9603	14.3275	Nontarget	1.81337
Repin1	64.6259	0.403784	0.371684	1.08636	0.277318	0.377789	70.3914	34.8778	89.2127	110.805	77.4266	32.0629	69.7976	89.5146	59.4368	36.7019	71.774	128.338	17.7082	16.7154	Nontarget	3.53181
Cenpm	16.6517	-0.409624	0.871689	-0.46992	0.638412	0.725762	9.30795	28.4529	10.6523	32.5896	14.4723	13.7412	19.5923	5.26557	12.8967	11.9033	21.1792	4.84294	19.5722	28.6549	Nontarget	15.9784
Usp6nl	182.913	-0.755334	0.223812	-3.37486	0.000738545	0.00198297	155.908	140.429	205.056	241.163	188.863	129.168	193.474	231.685	150.274	143.832	190.025	242.147	163.102	185.66	Nontarget	23.8904
Grk4	533.3	-2.92785	0.559354	-5.23435	1.65566e-07	7.37702e-07	646.321	274.433	371.498	1318.79	415.354	79.6991	276.741	739.812	593.246	115.065	599.49	845.093	646.814	543.847	Nontarget	136.258
Uhrf1bp1	479.345	0.979142	0.206677	4.73753	2.16334e-06	8.42198e-06	375.227	674.609	350.193	267.235	383.515	950.893	339.192	315.934	371.199	946.314	365.93	341.427	486.509	542.653	Nontarget	35.1477
Myo1c	326.195	0.790328	0.292196	2.70479	0.00683478	0.015141	293.782	399.259	299.595	152.085	275.697	482.775	337.967	310.668	289.894	470.181	320.63	343.849	295.447	294.907	Nontarget	32.5654
Ret	305.333	-4.90992	0.626449	-7.8377	4.58858e-15	4.38329e-14	106.46	187.239	102.528	456.255	40.5224	131	53.8788	115.842	68.9691	115.065	68.2442	133.181	1426.91	1268.58	Nontarget	108.944
Aff1	469.786	0.121133	0.14303	0.846901	0.39705	0.504518	479.36	404.766	519.298	527.952	450.088	440.635	503.277	637.134	487.269	450.342	473.003	513.351	353.231	337.292	Nontarget	25.9889
Bicdl1	46.4246	0.646599	0.822317	0.786313	0.431684	0.539067	12.2167	107.387	30.6252	43.4528	27.4973	54.0488	30.0007	0	37.5685	107.13	40.5935	43.5864	61.5126	54.325	Nontarget	11.4309
Cdc14a	55.9849	-0.162812	0.500708	-0.325163	0.745058	0.812352	61.0834	11.9319	77.2289	110.805	81.0447	8.24474	82.0427	57.9212	66.7262	14.8792	79.4221	111.388	12.1161	8.95466	Nontarget	1.87201
Cass4	24.4811	0.969152	0.656849	1.47546	0.14009	0.215943	13.3802	48.6453	14.6469	17.3811	18.0903	54.9649	20.8168	0	10.093	42.6536	12.9429	9.68588	46.6004	32.8338	Nontarget	7.11711
Rapgefl1	31.9389	-0.0285874	0.518435	-0.0551416	0.956026	0.969917	24.4334	43.1383	39.946	36.9349	23.8792	42.1398	34.8988	23.695	17.3825	36.7019	22.9442	21.7932	34.4843	44.7733	Nontarget	5.82831
Lrp8	125.887	-0.338187	0.57256	-0.590658	0.55475	0.653302	228.627	28.4529	201.061	269.408	133.868	19.2377	88.1653	123.741	231.579	22.8147	141.783	225.197	18.6402	29.8489	Nontarget	2.14737
Cdr2l	118.015	0.104428	0.325759	0.320568	0.748538	0.814964	140.201	69.7555	145.137	112.977	171.496	69.6222	160.412	197.459	109.341	70.428	130.605	154.974	55.9205	63.8766	Nontarget	10.2864
Atxn1l	269.913	-1.25921	0.257941	-4.8818	1.05124e-06	4.25596e-06	288.547	120.236	304.921	301.997	285.827	89.776	307.966	521.291	316.809	116.057	349.457	370.485	199.45	205.957	Nontarget	15.8347
Med13	1617.18	1.07174	0.114907	9.32707	1.08839e-20	1.64714e-19	2268.81	833.395	2387.44	1531.71	2214.98	936.236	2226.79	1629.69	2395.41	1013.77	2325.6	1590.91	667.318	618.469	Nontarget	38.5808
Foxk2	433.487	-0.288541	0.205418	-1.40465	0.160124	0.241113	428.166	213.856	512.64	527.952	481.203	251.006	573.075	660.829	480.541	271.793	568.309	583.574	260.962	254.909	Nontarget	32.0096
Zfp429	16.7078	-0.95204	0.948591	-1.00364	0.315554	0.419638	18.6159	8.26052	33.2883	21.7264	17.3667	10.993	12.8574	36.859	2.2429	10.9114	14.1195	24.2147	9.32009	13.1335	Nontarget	4.14944
Golga2	587.114	3.02636	0.175684	17.2261	1.69079e-66	3.17523e-64	849.933	604.854	719.028	249.854	845.181	691.642	750.63	292.239	894.916	723.127	828.343	268.783	256.302	244.761	Nontarget	33.8097
Thg1l	81.6302	0.703288	0.308854	2.27709	0.022781	0.0445696	66.3192	115.647	70.5712	56.4887	70.1905	103.517	75.9202	73.7179	68.4084	124.985	92.3649	46.0079	88.5408	90.1436	Nontarget	16.343
Rsbn1l	487.686	2.1347	0.185464	11.51	1.17456e-30	3.43554e-29	663.773	433.219	563.238	241.163	740.98	501.097	682.669	318.567	690.252	515.811	667.734	278.469	272.147	258.491	Nontarget	36.6423
Ddx23	748.203	2.0651	0.333468	6.19279	5.91074e-10	3.42519e-09	820.845	892.136	665.766	451.91	882.808	1009.52	729.813	1068.91	852.862	1165.53	771.277	624.739	249.778	288.937	Nontarget	60.8216
Trmt2a	105.52	0.430852	0.365104	1.18008	0.237967	0.334352	74.4636	179.896	75.8974	23.8991	66.5724	194.209	71.6343	100.046	72.3334	158.711	81.187	67.8011	164.966	145.663	Nontarget	27.3086
Zfp382	138.012	-2.15079	0.243313	-8.83961	9.60543e-19	1.23918e-17	142.528	58.7415	125.164	208.574	143.275	49.4684	140.207	255.38	121.677	48.6052	150.608	193.718	157.509	136.708	Nontarget	12.3941
Parp8	291.38	0.932811	0.247193	3.77361	0.000160902	0.000486473	210.592	541.523	143.806	219.437	207.677	598.201	185.515	171.131	203.543	617.981	179.435	121.073	343.911	335.501	Nontarget	81.0148
Unc79	18.1555	-1.54186	0.777996	-1.98184	0.0474977	0.0851629	13.9619	11.014	19.973	30.417	11.5778	7.32866	14.6942	5.26557	16.261	13.8872	18.826	60.5367	14.9121	15.5214	Nontarget	1.07776
Zfp780b	115.138	-1.58154	0.314027	-5.03633	4.7453e-07	2.00411e-06	110.532	53.2345	109.186	119.495	122.291	50.3845	141.432	86.8818	153.078	49.5972	132.37	169.503	165.898	148.05	Nontarget	20.3526
D430042O09Rik	205.098	0.644867	0.254676	2.5321	0.0113381	0.0237993	208.847	268.008	169.105	149.912	146.17	310.552	152.453	192.193	181.675	350.156	166.492	203.403	172.422	199.987	Nontarget	18.0266
Maats1	19.7896	2.16132	0.70146	3.08117	0.00206188	0.00507515	15.1254	54.1523	7.9892	17.3811	8.68336	38.4754	14.082	0	17.3825	52.573	11.7662	14.5288	11.1841	13.7305	Nontarget	2.90236
Tmem243	18.8422	1.43578	0.802064	1.7901	0.0734374	0.124182	15.7072	22.0281	10.6523	8.69057	15.9195	27.4825	15.3065	0	19.6253	33.7261	12.9429	2.42147	42.8724	36.4156	Nontarget	43.4563
Sbf1	485.197	0.0505712	0.195464	0.258724	0.795848	0.851983	350.212	701.227	350.193	297.652	293.063	784.166	360.621	326.465	301.109	824.305	356.517	433.443	681.298	732.491	Nontarget	64.8018
Btbd16	6.08931	-2.11348	1.04759	-2.01748	0.0436458	0.0790281	8.14446	5.50702	0	6.51793	4.34168	5.49649	2.44904	5.26557	3.36435	5.95166	2.94156	9.68588	13.0481	12.5365	Nontarget	2.39875
Coq10a	26.1095	-0.426587	0.604058	-0.706202	0.480063	0.584893	14.5437	31.2064	17.3099	45.6255	15.9195	24.7342	18.3678	47.3901	33.6435	35.71	19.4143	16.9503	21.4362	23.2821	Nontarget	6.19278
Vps51	57.4331	0.407372	0.356763	1.14186	0.253513	0.351443	35.4866	84.4409	41.2775	34.7623	42.6932	106.266	37.3478	55.2884	33.0827	119.033	38.2403	38.7435	63.3766	74.0252	Nontarget	16.8095
Ptpn23	446.285	0.656812	0.324915	2.02149	0.0432291	0.078351	360.101	532.345	334.215	312.86	384.962	660.495	349.6	637.134	348.77	775.7	457.118	409.228	292.651	392.811	Nontarget	35.4568
Pard3b	408.31	1.28538	0.315321	4.07641	4.57365e-05	0.000149969	752.781	48.6453	535.276	493.19	662.83	59.5453	506.951	584.478	742.399	73.4038	640.083	559.359	25.1642	32.2368	Nontarget	2.11472
Qrsl1	56.3756	0.515331	0.3979	1.29513	0.195277	0.283855	27.9239	127.579	19.973	15.2085	29.6682	124.587	28.1639	26.3278	22.429	111.098	29.4156	26.6362	90.4048	109.844	Nontarget	36.4073
Trappc10	230.754	-1.50808	0.209714	-7.19112	6.42641e-13	4.99308e-12	223.973	127.579	199.73	345.45	217.084	98.9368	243.067	426.511	264.101	108.122	219.44	375.328	191.994	189.242	Nontarget	17.9537
Tecpr2	84.5152	-2.56987	0.390383	-6.58295	4.61212e-11	2.98317e-10	65.7374	52.3166	59.919	65.1793	59.3363	39.3915	69.7976	171.131	77.3799	39.6777	64.126	145.288	142.597	131.335	Nontarget	10.5786
Mcur1	81.976	-0.0292003	0.310605	-0.0940113	0.9251	0.948047	100.642	33.0421	94.5388	99.9415	102.753	43.9719	96.1247	144.803	112.145	46.6214	98.8364	99.2802	39.1444	35.8187	Nontarget	5.86833
Ccno	8.16144	1.31096	1.21525	1.07876	0.280695	0.381708	3.49048	20.1924	6.65766	4.34528	3.61807	22.902	1.22452	0	1.12145	26.7825	1.17662	2.42147	8.38808	11.9396	Nontarget	3.46794
Zfp707	54.8142	-0.392641	0.339915	-1.15511	0.248044	0.345057	30.2508	77.0982	34.6198	41.2802	38.3515	82.4474	31.8375	57.9212	37.5685	87.291	41.1818	36.322	81.0848	90.1436	Nontarget	29.7851
Dennd3	15.023	-0.237613	0.918893	-0.258586	0.795954	0.851994	10.4714	11.014	11.9838	30.417	9.40698	17.4056	11.6329	13.1639	6.72869	27.7744	11.7662	29.0576	17.7082	1.79093	Nontarget	1.15105
Ltn1	406.204	0.784382	0.308538	2.54225	0.0110141	0.023196	393.261	437.808	338.209	365.004	337.928	707.215	316.538	194.826	389.143	651.707	377.696	213.089	487.441	476.985	Nontarget	43.1504
Lclat1	92.5513	-2.98083	0.465601	-6.40211	1.53243e-10	9.37266e-10	105.878	55.0702	83.8866	193.365	54.271	23.8181	61.2259	121.108	62.2404	37.6939	71.774	108.966	152.849	163.572	Nontarget	24.9668
Slc27a6	101.144	-0.497498	0.712168	-0.698569	0.484822	0.58939	138.456	16.521	135.816	408.457	75.9794	5.49649	61.2259	144.803	112.145	12.8953	85.3052	205.825	6.52406	6.56675	Nontarget	1.8316
Cep76	50.9678	1.33871	0.465976	2.87292	0.00406695	0.00944895	38.9771	78.016	31.9568	28.2443	44.864	109.014	51.4298	10.5311	33.6435	73.4038	46.4766	16.9503	73.6287	76.4131	Nontarget	12.4446
Fra10ac1	164.161	3.23604	0.360461	8.97748	2.7704e-19	3.75583e-18	191.977	226.705	166.442	30.417	206.23	307.804	183.678	36.859	205.786	258.897	190.025	101.702	101.589	90.1436	Nontarget	63.8559
Ogfrl1	84.575	-0.623385	0.358324	-1.73972	0.0819077	0.136232	77.3724	63.3307	111.849	99.9415	116.502	41.2237	113.268	89.5146	82.9872	44.6375	98.8364	65.3797	86.6768	92.5315	Nontarget	13.6808
Phf3	1196.5	2.16089	0.218865	9.87317	5.44146e-23	9.66942e-22	1753.97	1048.17	1611.15	606.167	1676.61	1233.96	1509.22	1050.48	1626.1	1252.82	1515.49	840.25	542.429	484.149	Nontarget	44.8578
Cubn	32.6051	-1.49523	0.666145	-2.2446	0.0247936	0.048035	23.8516	36.7134	15.9784	34.7623	22.432	32.0629	16.531	2.63278	20.1861	41.6616	22.3558	65.3797	56.8525	65.0706	Nontarget	3.37982
Sapcd2	33.4764	-1.43266	0.458276	-3.12618	0.00177092	0.00441353	9.8897	63.3307	11.9838	26.0717	8.68336	55.881	9.79615	23.695	11.2145	56.5408	14.7078	14.5288	82.9488	79.398	Nontarget	14.1373
Ppig	2115.49	3.5337	0.244983	14.4243	3.6417e-47	2.65122e-45	3407.29	1670.46	2643.09	849.503	3418.35	2033.7	3120.07	1445.4	3491.63	2258.66	3159.82	1162.31	468.8	487.731	Nontarget	59.3759
Lrp2	26.8541	-2.84573	0.735143	-3.871	0.000108391	0.000335506	21.5246	12.8497	11.9838	17.3811	22.432	11.9091	14.082	100.046	18.5039	7.93555	27.6507	55.6938	28.8923	25.0731	Nontarget	1.04736
Gpat2	162.265	-0.0522612	0.34456	-0.151675	0.879443	0.915414	41.304	338.681	51.9298	41.2802	39.0751	347.195	30.0007	13.1639	31.9613	319.406	39.4169	26.6362	443.636	508.028	Nontarget	107.971
Cep152	115.93	0.174556	0.426241	0.409523	0.682156	0.760985	112.859	121.154	118.506	236.818	117.949	89.776	118.778	147.436	113.266	112.09	120.604	65.3797	77.3567	71.0403	Nontarget	7.8209
Znhit6	311.081	2.49516	0.220276	11.3274	9.59853e-30	2.64817e-28	372.318	394.669	310.247	184.675	379.897	421.398	369.192	134.272	417.74	496.964	362.4	135.602	181.742	194.018	Nontarget	53.054
Grik3	190.862	-1.99675	0.236007	-8.46055	2.66108e-17	3.09045e-16	107.623	187.239	125.164	204.228	97.6878	185.049	91.2266	152.701	116.631	212.276	114.132	251.833	420.336	405.945	Nontarget	26.6797
Zfp362	326.673	1.3362	0.368601	3.62505	0.000288901	0.000839526	350.212	118.401	436.743	323.724	458.047	108.098	486.746	750.343	388.582	101.178	431.821	552.095	29.8243	37.6096	Nontarget	7.13918
Aunip	48.8131	-0.423926	0.436006	-0.972295	0.330904	0.436086	21.5246	94.5371	13.3153	13.0359	16.6431	121.839	20.2046	36.859	16.261	100.186	18.2377	43.5864	91.3369	75.8161	Nontarget	45.8799
Helq	53.8232	-0.526293	0.385476	-1.36531	0.172157	0.255438	43.631	50.481	61.2505	71.6972	54.9946	46.7202	43.4704	26.3278	49.9045	54.5569	53.5364	38.7435	76.4247	81.7859	Nontarget	14.0337
Lamtor4	62.2746	1.25937	0.435225	2.8936	0.00380854	0.00891248	50.0303	100.962	53.2613	26.0717	58.6127	88.8599	83.8795	13.1639	65.044	71.4199	54.713	41.165	81.0848	83.5769	Nontarget	81.646
Lmtk2	270.505	-3.80173	0.490463	-7.75131	9.0951e-15	8.42521e-14	217.573	114.729	155.789	1160.19	108.542	65.0418	118.778	600.275	125.602	85.3072	134.135	414.071	248.846	238.194	Nontarget	18.2808
Tmf1	931.775	0.575971	0.281739	2.04434	0.0409199	0.0745416	1285.66	381.82	1256.97	1342.69	1398.02	428.726	1425.95	610.806	1378.26	446.375	1366.65	934.687	409.152	379.081	Nontarget	43.4985
Ankrd26	428.168	0.767976	0.297595	2.58061	0.00986263	0.0210038	450.854	451.575	396.797	588.786	435.615	552.397	407.765	384.386	428.393	586.239	413.583	259.097	337.387	301.474	Nontarget	38.2156
Ipo8	355.32	1.37484	0.232821	5.90513	3.52379e-09	1.89503e-08	389.771	335.928	416.77	204.228	437.786	492.852	382.662	260.646	396.993	408.681	428.291	324.477	248.846	246.552	Nontarget	30.8032
Clip3	403.331	0.838077	0.233452	3.58994	0.000330758	0.000950108	441.546	304.721	588.537	430.183	482.65	362.768	483.073	494.963	381.292	340.237	521.833	409.228	181.742	223.867	Nontarget	38.3109
Arhgef17	733.482	-0.338113	0.201291	-1.67972	0.0930115	0.151933	815.609	440.561	936.067	834.295	791.633	481.859	793.488	1137.36	656.047	498.948	828.931	1121.14	457.616	475.194	Nontarget	26.3616
Mki67	1177.12	0.170204	0.370864	0.458939	0.646278	0.732236	1051.22	998.605	1346.18	914.682	1190.34	1162.51	1311.46	1890.34	785.014	987.976	1654.92	1649.02	712.987	824.426	Nontarget	46.8585
Phrf1	1062.34	0.623274	0.24951	2.49799	0.01249	0.0259765	919.742	1178.5	984.003	992.898	945.039	1419.93	776.957	1763.96	915.663	1544.46	880.114	1375.39	548.021	628.02	Nontarget	59.7184
Abhd13	118.707	-2.82013	0.323302	-8.7229	2.71157e-18	3.38199e-17	94.8248	75.2625	89.2127	288.961	76.703	57.7132	88.1653	171.131	82.4265	52.573	71.774	162.238	172.422	178.496	Nontarget	24.9175
Gpr161	40.7797	-2.92377	0.524734	-5.57191	2.51957e-08	1.22827e-07	23.8516	33.0421	10.6523	60.834	28.2209	19.2377	28.7762	28.9606	28.5969	21.8228	33.5338	67.8011	89.4728	96.1134	Nontarget	8.3736
Ogdhl	253.684	1.79623	0.291125	6.16996	6.83066e-10	3.91109e-09	126.239	496.549	115.843	56.4887	115.055	771.341	120.003	68.4524	118.874	655.675	118.839	55.6938	320.611	411.914	Nontarget	58.9636
Dhtkd1	41.2375	-0.33067	0.460733	-0.717703	0.47294	0.578392	38.9771	54.1523	23.9676	47.7981	28.9445	56.7971	33.6743	42.1245	31.4006	55.5488	26.474	12.1073	53.1245	72.2343	Nontarget	10.5837
Kif16b	357.293	1.60432	0.192171	8.34842	6.9181e-17	7.76161e-16	416.531	467.178	335.546	345.45	358.912	495.6	335.518	300.137	390.264	545.569	351.222	259.097	210.634	190.436	Nontarget	23.6759
Tigd2	107.765	1.17644	0.324148	3.62932	0.000284168	0.000826789	107.623	129.415	117.175	71.6972	138.934	140.161	117.554	18.4295	116.07	124.985	105.896	70.2226	132.345	118.202	Nontarget	31.1019
Oxtr	84.5664	-1.70456	0.4997	-3.41116	0.000646873	0.00175393	73.3001	11.014	93.2073	173.811	99.135	4.58041	121.84	192.193	88.5944	4.95972	102.366	196.139	10.2521	12.5365	Nontarget	1.66073
Lonrf1	144.413	0.135577	0.262784	0.515926	0.605906	0.697895	136.129	124.826	146.469	189.02	153.406	108.098	172.657	207.99	169.899	141.848	141.783	130.759	101.589	97.3073	Nontarget	17.7301
Gan	72.6394	0.457051	0.371346	1.2308	0.218399	0.311439	81.4446	88.1122	71.9028	80.3878	53.5474	91.6082	63.675	65.8196	62.8011	99.1944	73.539	26.6362	78.2887	79.995	Nontarget	15.384
Trnp1	46.8342	-0.254559	0.520722	-0.488858	0.624942	0.714282	19.1977	108.305	19.973	41.2802	12.3014	72.3705	18.3678	15.7967	31.9613	106.138	24.1208	43.5864	73.6287	68.6524	Nontarget	31.9292
Lmod3	7.86645	0.345591	1.01291	0.341186	0.732964	0.801843	4.65398	14.6854	5.32613	15.2085	10.8542	11.9091	4.89807	0	3.36435	7.93555	6.47143	14.5288	3.72803	6.56675	Nontarget	1.70038
Cluh	548.335	0.712391	0.168022	4.23987	2.23649e-05	7.67767e-05	391.516	861.848	390.139	323.724	407.394	1040.67	354.498	415.98	398.675	1058.4	395.934	397.121	585.301	655.481	Nontarget	66.6891
Slc4a11	29.5387	-2.72029	0.688189	-3.95282	7.72354e-05	0.00024452	5.81747	55.0702	11.9838	39.1076	7.23613	38.4754	7.95937	7.89835	4.48579	54.5569	2.35325	41.165	71.7647	65.6675	Nontarget	12.9627
Sap30l	97.7137	0.807142	0.416174	1.93943	0.0524487	0.0927519	66.9009	109.222	81.2235	69.5246	110.713	112.678	120.615	173.764	94.7624	123.001	94.7182	101.702	51.2605	57.9068	Nontarget	27.8897
Aspg	14.8142	-0.351336	0.935009	-0.375757	0.707098	0.781419	1.16349	33.0421	2.66307	2.17264	9.40698	40.3076	4.89807	5.26557	5.04652	31.7422	5.29481	21.7932	26.0962	18.5063	Nontarget	4.84574
Pacs2	476.748	-0.689486	0.14988	-4.60026	4.21962e-06	1.58846e-05	426.421	397.423	444.732	586.613	445.746	370.097	442.051	797.733	467.083	400.745	417.701	665.904	404.492	407.736	Nontarget	45.0057
Lama5	134.283	-4.36291	0.398863	-10.9383	7.5566e-28	1.81776e-26	67.4827	64.2485	93.2073	284.616	60.7835	44.888	51.4298	168.498	53.2688	58.5247	58.2429	130.759	377.464	366.544	Nontarget	18.4663
Frmpd1	134.313	1.6396	0.376748	4.35197	1.34919e-05	4.76529e-05	80.8628	286.365	65.2451	54.3161	96.9642	305.971	65.5117	78.9835	115.509	352.14	64.7143	101.702	103.453	108.65	Nontarget	12.6576
Lrch2	227.486	3.17336	0.256693	12.3625	4.17115e-35	1.57022e-33	396.17	170.717	323.562	108.632	353.847	178.636	300.619	144.803	372.321	192.437	384.168	154.974	46.6004	57.3098	Nontarget	8.08459
Itpkb	253.955	1.32439	0.258578	5.12182	3.02599e-07	1.30841e-06	389.189	68.8377	420.764	215.092	395.817	63.2097	375.315	331.731	414.936	63.4844	425.349	317.212	41.0084	33.4307	Nontarget	4.16568
Kif13b	372.152	1.68533	0.216326	7.79072	6.66305e-15	6.24226e-14	409.55	480.028	392.802	195.538	423.314	574.383	309.803	255.38	381.853	612.029	363.577	237.304	296.379	278.192	Nontarget	30.6059
Heatr5b	322.515	0.931095	0.302242	3.08062	0.00206567	0.00508223	302.508	337.764	256.986	169.466	290.893	592.705	234.495	160.6	255.69	619.965	275.33	213.089	383.056	422.66	Nontarget	38.8216
Maip1	59.8461	0.893094	0.524009	1.70435	0.0883157	0.145388	69.8097	59.6593	86.5496	34.7623	70.1905	69.6222	60.6137	7.89835	53.2688	63.4844	68.8325	72.6441	51.2605	69.2494	Nontarget	41.3724
Atp8b2	649.764	-2.76407	0.353194	-7.82591	5.03994e-15	4.79505e-14	655.629	306.557	565.901	1814.16	409.565	184.132	369.805	1487.52	499.045	211.284	480.062	1017.02	539.633	556.383	Nontarget	59.1287
Focad	180.13	-0.19724	0.321379	-0.613731	0.539393	0.639795	73.8819	240.473	86.5496	156.43	85.3864	388.419	88.7776	115.842	110.463	411.657	95.8948	118.652	286.127	263.267	Nontarget	29.3949
Flnc	153.616	0.42962	0.404303	1.06262	0.287955	0.389391	148.927	161.539	147.8	78.2151	164.26	154.818	150.616	236.95	141.863	141.848	200.026	220.354	102.521	100.889	Nontarget	6.20577
Exosc7	53.5507	1.41254	0.421138	3.35409	0.000796272	0.00212725	28.5056	103.715	46.6036	26.0717	42.6932	110.846	47.7562	23.695	43.7365	92.2508	37.0636	29.0576	48.4645	69.2494	Nontarget	46.2006
Uprt	108.102	-1.72533	0.362252	-4.76279	1.9093e-06	7.48415e-06	138.456	28.4529	127.827	202.056	120.843	16.4895	129.187	123.741	165.974	23.8066	165.904	130.759	67.1046	72.8313	Nontarget	7.22509
Hcn4	7.82426	-3.25978	0.906625	-3.59551	0.000323759	0.000932132	2.32699	9.17836	6.65766	13.0359	0.723613	5.49649	3.0613	13.1639	1.12145	9.91944	2.35325	14.5288	13.0481	14.9244	Nontarget	1.26526
Arid4a	632.561	0.111986	0.770731	0.145298	0.884476	0.918778	761.507	151.443	605.847	236.818	772.096	194.209	594.504	1895.6	905.57	240.05	740.096	1542.48	124.889	90.7406	Nontarget	12.9529
Dpy19l4	82.1488	-3.45121	0.559146	-6.17229	6.73079e-10	3.8569e-09	83.7716	36.7134	67.9082	247.681	41.9696	23.8181	56.3279	86.8818	77.3799	15.8711	60.5961	106.545	125.821	118.799	Nontarget	31.4471
B3glct	19.8949	-2.51178	0.587865	-4.27271	1.93114e-05	6.67937e-05	15.1254	12.8497	19.973	26.0717	12.3014	8.24474	11.0207	18.4295	17.9432	11.9033	15.2961	48.4294	31.6883	29.2519	Nontarget	4.31369
Dgki	119.137	-1.25616	0.322937	-3.88982	0.000100319	0.000311866	60.5017	189.074	53.2613	178.157	62.9544	179.552	42.8582	84.2491	50.4652	206.324	54.713	113.809	215.294	176.705	Nontarget	10.0984
Irs2	187.023	0.8884	0.370858	2.39552	0.0165967	0.0335794	145.437	260.665	157.121	117.323	136.763	289.482	143.269	242.216	149.713	411.657	137.077	94.4373	161.238	171.93	Nontarget	14.8788
Ermp1	95.0611	-3.17879	0.420633	-7.55715	4.11983e-14	3.59095e-13	70.9731	51.3988	77.2289	136.876	50.6529	43.9719	60.0014	255.38	61.1189	40.6697	64.126	92.0158	172.422	154.02	Nontarget	20.95
Zfp174	33.7214	-1.49176	0.494172	-3.0187	0.00253859	0.00613973	27.3421	26.6172	33.2883	41.2802	20.2612	18.3216	28.7762	78.9835	31.9613	31.7422	22.9442	33.9006	37.2803	39.4005	Nontarget	4.15168
Hcfc2	127.039	0.496459	0.262171	1.89364	0.0582725	0.101712	84.3533	213.856	82.555	80.3878	68.0197	238.181	88.7776	76.3507	103.734	221.203	86.4818	65.3797	183.606	185.66	Nontarget	58.2146
Myo1a	23.9571	1.33166	0.594396	2.24035	0.0250681	0.0485044	16.8707	35.7956	23.9676	4.34528	20.9848	38.4754	18.3678	18.4295	23.5504	42.6536	21.1792	38.7435	17.7082	14.3275	Nontarget	3.09773
Ercc6	374.482	0.247208	0.194542	1.27072	0.203828	0.294112	462.489	239.555	444.732	464.945	460.942	294.062	424.296	389.652	474.933	314.446	404.17	334.163	275.875	258.491	Nontarget	21.0214
Esco1	475.204	-0.280642	0.205388	-1.36639	0.171815	0.254999	360.101	460.754	416.77	614.858	407.394	563.39	462.256	429.144	447.458	535.65	439.469	445.55	517.265	552.801	Nontarget	90.2639
Rbbp8	292.273	1.66005	1.29917	1.27778	0.201327	0.291139	274.585	485.535	288.943	252.027	219.979	477.279	402.867	207.99	184.478	521.762	231.207	0	292.651	252.521	Nontarget	55.9501
2310009B15Rik	16.9261	-0.243076	0.644449	-0.377184	0.706037	0.780779	18.6159	14.6854	18.6415	17.3811	20.2612	18.3216	19.5923	7.89835	17.3825	4.95972	21.1792	19.3718	19.5722	19.1033	Nontarget	49.8413
D5Ertd579e	1085.98	2.11724	0.236584	8.94918	3.58132e-19	4.78454e-18	1681.25	739.776	1495.31	669.174	1633.2	867.53	1337.17	1121.57	1715.26	912.588	1535.49	786.977	376.532	331.92	Nontarget	33.7065
Pigg	41.2043	-2.98907	0.59298	-5.04076	4.63686e-07	1.96132e-06	44.2128	19.2746	38.6144	110.805	34.7334	17.4056	27.5517	55.2884	40.3721	4.95972	28.239	43.5864	50.3285	61.4887	Nontarget	9.66615
Mn1	591.357	-4.34854	1.26327	-3.4423	0.0005768	0.00158106	56.4295	220.281	67.9082	43.4528	62.2308	284.901	52.6543	3164.61	52.7081	223.187	67.6559	3726.64	120.229	136.111	Nontarget	11.2402
2410131K14Rik	64.5307	-1.81581	0.322011	-5.63896	1.71076e-08	8.50028e-08	42.4675	67.002	43.9406	91.251	45.5876	60.4614	30.613	118.475	37.0078	66.4602	34.7104	89.5944	77.3567	98.5013	Nontarget	20.9679
Klhl42	154.074	1.0071	0.31012	3.24745	0.00116446	0.00301203	214.083	42.2204	230.355	223.782	216.36	27.4825	216.128	186.928	227.093	39.6777	240.031	256.676	17.7082	18.5063	Nontarget	1.83604
Palb2	102.522	1.08988	0.34724	3.13869	0.00169703	0.00423706	59.92	197.335	57.2559	52.1434	91.1753	221.692	60.0014	26.3278	68.4084	195.413	56.4779	43.5864	142.597	162.975	Nontarget	29.6114
Prmt9	222.89	2.2181	0.257298	8.62075	6.65156e-18	8.08791e-17	158.817	401.094	151.795	71.6972	146.17	540.488	150.004	81.6163	153.078	601.118	151.196	79.9085	222.75	210.733	Nontarget	56.4263
Ripor1	233.053	0.998007	0.247811	4.0273	5.64219e-05	0.000182293	251.315	149.607	310.247	252.027	272.079	158.482	281.639	389.652	312.884	165.655	301.216	268.783	66.1726	82.9799	Nontarget	10.506
Tln2	522.676	1.08378	0.224179	4.83445	1.33513e-06	5.33212e-06	414.204	721.419	419.433	358.486	370.49	1039.75	384.499	502.862	389.143	1078.24	388.874	428.6	426.86	394.602	Nontarget	19.6492
Polr3a	354.579	1.02992	0.290649	3.54353	0.000394813	0.00111514	212.919	672.774	215.708	115.15	242.411	820.809	163.473	239.583	195.693	828.273	190.025	154.974	422.2	490.119	Nontarget	61.1844
Uggt2	57.9268	-2.94111	0.456303	-6.44551	1.15211e-10	7.13366e-10	78.5359	18.3567	53.2613	93.4236	44.864	20.1538	48.3685	36.859	52.7081	16.863	48.2416	65.3797	112.773	121.186	Nontarget	12.3651
Fbxo43	15.4606	-1.66889	0.680328	-2.45307	0.0141643	0.0290927	12.7984	19.2746	10.6523	15.2085	12.3014	10.993	15.9187	18.4295	9.53231	10.9114	5.29481	14.5288	30.7563	29.8489	Nontarget	5.53647
Hpse2	26.1928	-1.57838	0.53192	-2.96732	0.00300408	0.00717005	10.4714	55.988	3.9946	21.7264	10.1306	38.4754	9.79615	13.1639	8.97159	37.6939	11.7662	31.4791	58.7166	54.325	Nontarget	17.5688
Tnks1bp1	836.624	2.34096	0.344719	6.79094	1.11406e-11	7.67441e-11	899.381	1157.39	720.359	208.574	852.417	1558.26	712.058	523.924	869.683	1791.45	751.274	365.642	602.078	700.255	Nontarget	62.5419
Dnaaf5	145.66	0.027956	0.239847	0.116557	0.907211	0.935165	83.7716	245.062	86.5496	123.841	66.5724	285.818	78.3692	155.334	84.6694	297.583	84.7169	99.2802	173.354	174.317	Nontarget	32.7823
Ccdc142	17.7004	-1.91567	0.636986	-3.00739	0.00263503	0.00635993	14.5437	10.0962	21.3045	45.6255	12.3014	5.49649	12.8574	18.4295	12.3359	13.8872	15.8844	31.4791	18.6402	14.9244	Nontarget	3.21141
Rsf1	1387.07	2.43787	0.224245	10.8715	1.57596e-27	3.71001e-26	2482.31	722.337	2122.46	1036.35	2207.74	982.956	1822.7	976.763	2273.18	1080.23	2123.81	791.82	410.084	386.244	Nontarget	24.8409
Dscaml1	78.2461	1.40218	0.369604	3.79373	0.000148403	0.000450414	40.1406	194.581	30.6252	36.9349	33.2862	171.307	33.6743	31.5934	34.2042	262.865	33.5338	36.322	82.9488	73.4282	Nontarget	6.59927
Tbc1d4	167.896	1.04845	0.445732	2.35219	0.0186632	0.0372904	224.554	95.4549	238.344	117.323	247.476	88.8599	226.536	271.177	183.918	122.009	222.97	196.139	82.9488	32.8338	Nontarget	5.57496
Fam217b	133.671	0.363366	0.304344	1.19393	0.232505	0.327624	54.1025	313.9	78.5604	93.4236	62.9544	306.887	80.206	78.9835	59.9975	250.962	54.713	55.6938	186.402	194.615	Nontarget	56.9152
Prrc2c	6650.77	2.99857	0.267661	11.2029	3.9478e-29	1.03558e-27	8691.3	8453.27	7700.25	3009.11	7660.17	10578	6135.45	5439.33	7932.01	11535.3	7423.32	3818.66	2298.33	2436.27	Nontarget	140.009
Prr19	61.3119	0.319865	0.566634	0.5645	0.572414	0.668548	7.56271	137.675	13.3153	21.7264	25.3265	160.314	20.8168	15.7967	20.7468	147.8	16.4727	9.68588	105.317	155.811	Nontarget	62.6047
Arhgef26	22.926	0.309455	0.56141	0.55121	0.58149	0.676835	23.2699	19.2746	26.6307	15.2085	36.1807	20.1538	24.4904	31.5934	19.0646	16.863	30.0039	24.2147	14.9121	19.1033	Nontarget	2.29178
Adgrl2	334.607	-3.44711	0.48146	-7.1597	8.08537e-13	6.23222e-12	453.763	65.1663	451.39	992.898	238.069	44.888	236.332	600.275	211.393	66.4602	279.448	462.501	293.583	288.34	Nontarget	31.9783
Trio	4122.5	-2.75577	0.202012	-13.6416	2.26514e-42	1.26894e-40	1034.35	746.201	1031.94	16820.6	898.004	671.488	739.609	17984.5	857.908	822.321	888.939	14662	307.563	249.537	Nontarget	14.9192
Atf6	166.955	-1.90879	0.413608	-4.61498	3.9314e-06	1.48741e-05	229.79	76.1804	190.409	341.105	158.471	61.3775	123.064	342.262	179.432	53.565	128.84	169.503	147.257	136.111	Nontarget	12.2947
Ppp1r12b	145.492	-1.22375	0.426709	-2.86787	0.00413244	0.00958092	206.52	35.7956	175.762	139.049	224.32	45.8041	191.637	336.996	164.292	31.7422	181.2	138.024	85.7448	79.995	Nontarget	17.9928
Pik3r4	398.159	2.15655	0.262683	8.20971	2.2173e-16	2.36865e-15	336.25	655.335	319.568	128.186	314.048	921.578	250.414	139.538	275.316	1006.82	262.975	147.71	391.444	425.048	Nontarget	49.8513
Brpf3	527.445	1.19892	0.220017	5.44923	5.05883e-08	2.39137e-07	712.058	245.98	680.413	599.649	674.408	275.741	688.179	950.435	637.543	262.865	637.142	828.142	84.8128	106.859	Nontarget	9.4042
Dsel	139.688	-2.14772	0.310996	-6.90593	4.98755e-12	3.54818e-11	164.053	28.4529	142.474	236.818	172.944	56.7971	173.882	171.131	155.881	38.6858	149.431	150.131	168.694	146.259	Nontarget	19.5646
Cyb561d1	22.8568	-4.0306	0.522688	-7.71128	1.24559e-14	1.13979e-13	13.3802	13.7675	9.32073	43.4528	9.40698	11.9091	9.79615	47.3901	11.2145	7.93555	10.5896	46.0079	34.4843	51.3401	Nontarget	5.83963
Pds5a	594.956	0.181323	0.178599	1.01525	0.309986	0.413498	766.161	390.998	691.065	438.874	774.99	517.586	653.893	494.963	648.197	481.093	747.156	513.351	618.854	592.202	Nontarget	63.8254
Agl	360.093	-0.684686	0.146248	-4.68168	2.84538e-06	1.09279e-05	319.379	368.97	291.606	456.255	296.682	374.677	276.129	387.019	291.016	373.963	312.982	489.137	410.084	393.408	Nontarget	33.3544
Zkscan2	111.069	-0.164174	0.284684	-0.57669	0.564149	0.661402	97.7335	138.593	73.2343	139.049	77.4266	164.895	68.573	89.5146	79.6228	180.534	83.5403	96.8588	130.481	134.917	Nontarget	15.1622
Dnah2	86.1619	-1.86761	0.433135	-4.31184	1.61899e-05	5.65294e-05	68.0644	54.1523	71.9028	102.114	68.0197	53.1328	56.9401	163.233	95.3231	69.4361	63.5377	53.2723	144.461	142.678	Nontarget	5.91886
Slc9a5	13.694	-1.26147	0.705514	-1.78802	0.0737734	0.124686	8.72621	15.6032	6.65766	21.7264	10.1306	8.24474	10.4084	7.89835	10.093	16.863	14.1195	24.2147	23.3002	13.7305	Nontarget	2.06451
Plekhg4	89.8257	0.314595	0.388509	0.809752	0.418083	0.525377	23.2699	197.335	25.2991	28.2443	20.9848	229.937	33.6743	13.1639	21.3075	246.002	21.7675	29.0576	177.082	190.436	Nontarget	23.1014
Cul9	139.922	1.53015	0.347523	4.403	1.06763e-05	3.81979e-05	147.182	182.649	150.463	84.733	94.0698	251.006	117.554	55.2884	131.209	268.817	120.604	116.231	122.093	117.008	Nontarget	8.36895
Dgkh	235.334	-0.282077	0.293202	-0.962056	0.336021	0.441457	128.566	284.529	182.42	228.127	175.838	327.041	168.371	200.092	172.142	396.777	172.964	128.338	318.747	410.721	Nontarget	16.5612
Setd2	2046.88	0.450208	0.181181	2.48485	0.0129606	0.0268471	2525.36	1161.98	2386.11	2333.42	2447.26	1444.66	2172.91	3298.88	2468.31	1485.93	2446.2	2765.32	891.932	828.008	Nontarget	64.9063
C9orf72	192.662	1.26712	0.233079	5.43646	5.43506e-08	2.56043e-07	186.741	257.912	194.404	108.632	216.36	221.692	216.74	129.006	251.204	246.994	192.378	113.809	173.354	188.048	Nontarget	41.7735
Stxbp5	189.007	0.480693	0.260579	1.84471	0.06508	0.111869	116.349	270.762	122.501	184.675	144.723	360.02	121.84	142.17	114.948	364.043	156.491	193.718	178.946	174.914	Nontarget	14.424
Chd2	1037.23	1.72603	0.224797	7.67816	1.61387e-14	1.46061e-13	1504.98	735.187	1318.22	866.884	1322.77	963.718	1220.23	1184.75	1449.47	1061.38	1288.4	818.457	403.56	383.26	Nontarget	25.9788
Slc43a1	9.06718	-2.57888	0.974574	-2.64617	0.00814097	0.017693	7.56271	9.17836	0	19.5538	2.89445	13.7412	3.0613	5.26557	5.60724	5.95166	4.11818	9.68588	15.8441	24.4761	Nontarget	5.12083
Ttc37	208.133	0.192273	0.292075	0.658299	0.510346	0.612846	206.52	202.842	193.072	123.841	233.727	215.279	172.045	263.278	222.608	238.066	232.971	179.189	220.886	209.539	Nontarget	27.8692
2210408I21Rik	42.4848	-1.61742	0.415957	-3.88843	0.000100894	0.000313475	43.631	15.6032	50.5982	84.733	46.3113	13.7412	47.7562	50.0229	45.9794	13.8872	51.7714	67.8011	37.2803	25.67	Nontarget	9.40124
Arhgap21	1116.1	1.09202	0.173359	6.29922	2.99155e-10	1.78349e-09	1330.46	962.81	1327.54	988.552	1271.39	1055.33	1257.58	1463.83	1223.5	1168.51	1328.41	1186.52	521.925	539.071	Nontarget	47.1146
Tbccd1	81.8881	-0.377707	0.358384	-1.05392	0.29192	0.393593	80.8628	72.509	75.8974	108.632	67.2961	84.2795	77.1447	44.7573	67.8476	96.2185	72.9507	128.338	80.1528	89.5466	Nontarget	20.2193
Dmxl1	632.946	-1.02184	0.258927	-3.94645	7.9317e-05	0.0002505	828.99	284.529	699.055	719.145	699.734	344.447	722.466	966.231	663.898	318.414	801.281	532.723	718.579	561.756	Nontarget	37.599
Cep164	353.432	2.63361	0.278262	9.46448	2.95021e-21	4.62134e-20	407.223	468.096	355.519	132.531	369.043	570.719	376.539	255.38	449.14	665.594	342.397	184.032	195.722	176.108	Nontarget	19.5623
Chd5	195.906	2.4802	0.369891	6.70521	2.01112e-11	1.34995e-10	168.125	354.285	127.827	71.6972	166.431	385.67	115.717	89.5146	208.029	549.537	131.782	89.5944	160.306	124.171	Nontarget	8.29359
Ankrd11	1446.9	0.739817	1.72224	0.429568	0.66751	0.749051	2529.44	955.467	1873.47	0	1677.34	984.788	1498.81	2788.12	1985.52	1118.91	1857.89	1266.43	781.955	938.449	Nontarget	57.3821
Elp6	30.9694	-0.0920617	0.494277	-0.186255	0.852245	0.896397	18.0342	52.3166	17.3099	26.0717	20.2612	48.5523	21.4291	5.26557	15.1396	64.4763	15.2961	31.4791	46.6004	51.3401	Nontarget	16.851
Zfp777	237.159	1.65255	0.208682	7.919	2.39425e-15	2.33161e-14	258.877	312.982	250.328	147.74	287.275	295.894	238.781	192.193	255.69	358.092	235.913	193.718	135.141	157.602	Nontarget	27.1821
Ctcfl	73.5331	-3.48028	0.490124	-7.10082	1.24021e-12	9.39311e-12	34.9048	40.3848	15.9784	189.02	49.2057	47.6363	41.0214	131.639	31.4006	50.5891	38.8286	94.4373	97.8609	166.557	Nontarget	27.9114
Amotl1	465.084	-0.334796	0.45113	-0.742129	0.458009	0.564352	521.245	190.91	391.471	380.212	536.921	229.937	516.747	1416.44	531.006	202.357	510.066	777.292	145.393	161.184	Nontarget	10.6445
Adamts3	29.9238	-1.98121	0.49994	-3.9629	7.4045e-05	0.000235004	13.3802	33.0421	14.6469	36.9349	14.4723	28.3985	25.1026	21.0623	16.8217	29.7583	19.4143	58.1153	54.0565	53.728	Nontarget	4.50993
Lrr1	11.6033	3.53513	1.46001	2.42131	0.0154647	0.0315012	4.07223	32.1243	3.9946	0	2.17084	29.3146	3.0613	0	2.80362	21.8228	11.7662	0	29.8243	21.4912	Nontarget	13.8694
Plb1	23.8449	-2.17186	0.819864	-2.64905	0.00807185	0.0175659	6.98097	30.2886	17.3099	41.2802	5.06529	35.7272	7.95937	2.63278	10.6538	26.7825	6.47143	9.68588	72.6967	60.2947	Nontarget	12.1927
Phf20l1	565.754	-0.270618	0.149999	-1.80413	0.0712102	0.12091	892.4	150.525	810.903	595.304	885.703	143.825	843.081	552.884	897.159	166.647	885.409	510.93	315.951	269.834	Nontarget	33.3915
Sclt1	181.442	2.36014	0.358097	6.59078	4.37522e-11	2.8366e-10	228.045	145.018	207.719	143.394	260.501	181.384	257.149	76.3507	282.605	160.695	282.978	198.56	68.0366	47.7582	Nontarget	14.5655
Samd1	389.369	1.67007	0.317175	5.26546	1.39841e-07	6.2748e-07	394.425	542.441	248.997	186.847	429.103	547.817	444.5	305.403	471.569	590.206	463.001	191.296	306.631	328.935	Nontarget	106.857
Fndc1	14.8258	-1.95499	1.01708	-1.92216	0.0545861	0.0961409	7.56271	16.521	2.66307	19.5538	18.0903	26.5664	1.83678	15.7967	2.2429	15.8711	5.29481	33.9006	19.5722	22.0882	Nontarget	2.1139
Bicra	166.042	0.392883	0.312211	1.25839	0.208251	0.29937	131.475	166.128	169.105	171.639	137.487	163.063	175.106	323.832	126.163	204.34	157.079	232.461	80.1528	86.5617	Nontarget	8.20814
Dip2a	202.094	-0.197863	0.25087	-0.788706	0.430284	0.537644	186.741	143.182	187.746	215.092	210.572	170.391	197.76	308.036	213.075	216.244	225.323	220.354	172.422	162.378	Nontarget	16.1821
Fam206a	116.958	-1.93727	0.283748	-6.82744	8.64415e-12	6.01234e-11	67.4827	96.3728	82.555	169.466	74.5322	97.1047	93.6757	129.006	68.4084	109.114	90.6	101.702	231.138	226.254	Nontarget	35.6928
Bod1l	1324.25	2.5861	0.2313	11.1807	5.06838e-29	1.31906e-27	2646.37	552.537	2067.87	788.669	2127.42	674.236	1825.76	1074.18	2373.55	768.756	2168.52	951.637	250.71	269.237	Nontarget	16.0366
Rbm24	9.91185	-0.467594	0.895927	-0.521911	0.601732	0.694478	7.56271	5.50702	6.65766	10.8632	14.4723	12.8251	12.8574	7.89835	3.92507	12.8953	7.05974	7.26441	15.8441	13.1335	Nontarget	3.07281
Dip2c	242.857	0.897943	0.189075	4.74914	2.04287e-06	7.98121e-06	332.759	185.403	284.948	243.336	279.315	206.118	292.66	239.583	283.726	201.365	312.982	292.998	123.025	121.783	Nontarget	9.58613
Fam184a	48.1151	0.607086	0.461536	1.31536	0.188388	0.275709	43.0493	53.2345	25.2991	49.9708	47.0349	62.2936	45.3072	55.2884	47.6616	95.2266	31.1805	41.165	42.8724	34.0277	Nontarget	6.3194
Ccdc15	202.777	1.47446	0.215681	6.83633	8.12493e-12	5.6679e-11	243.752	205.595	287.611	149.912	264.843	186.881	231.434	200.092	238.869	222.195	238.266	145.288	113.705	110.441	Nontarget	22.8837
Zscan25	73.9156	1.41092	0.410044	3.44089	0.000579796	0.00158795	55.8477	124.826	66.5766	73.8698	66.5724	121.839	54.4911	18.4295	57.1939	152.759	66.4792	26.6362	69.9007	79.398	Nontarget	22.135
Ankrd44	118.815	0.359462	0.256046	1.40389	0.160351	0.24141	89.0073	178.06	97.2019	95.5963	94.0698	152.986	100.411	136.905	83.5479	199.381	101.778	94.4373	123.025	117.008	Nontarget	13.0156
Fbxo47	35.3077	0.275442	0.446201	0.617305	0.537033	0.637939	13.9619	68.8377	19.973	21.7264	16.6431	79.6991	21.4291	13.1639	19.6253	73.4038	17.061	33.9006	44.7364	50.1461	Nontarget	22.1048
Wdr86	7.32002	-2.68954	1.09776	-2.45002	0.0142847	0.0293108	1.74524	7.34269	3.9946	6.51793	4.34168	4.58041	3.67356	36.859	4.48579	5.95166	1.17662	7.26441	5.59205	8.95466	Nontarget	2.66536
Ncam1	133.166	-1.42649	0.309514	-4.60883	4.04948e-06	1.52824e-05	163.471	70.6734	95.8703	258.544	119.396	58.6292	105.309	236.95	135.135	60.5086	140.018	242.147	100.657	77.0101	Nontarget	9.54921
Iqck	24.1214	-0.45548	0.786616	-0.579037	0.562564	0.6602	18.0342	20.1924	15.9784	45.6255	15.9195	24.7342	22.6536	2.63278	13.4574	34.718	32.3571	46.0079	23.3002	22.0882	Nontarget	7.3067
Nin	198.796	1.55821	0.359821	4.33052	1.4876e-05	5.21892e-05	295.528	35.7956	279.622	162.948	345.887	52.2167	380.825	215.888	319.052	43.6455	350.634	256.676	13.9801	30.4459	Nontarget	1.46403
Gtf2ird1	153.673	0.296375	0.306279	0.967665	0.333212	0.438568	175.106	110.14	195.735	110.805	170.049	117.258	185.515	229.052	168.778	102.17	178.258	242.147	87.6088	78.801	Nontarget	12.5179
Zxdb	90.6147	1.01658	0.40298	2.52266	0.0116469	0.0244075	95.9883	22.9459	109.186	189.02	104.924	36.6433	115.105	194.826	106.538	31.7422	104.719	138.024	11.1841	7.76071	Nontarget	1.27902
Brwd3	1069.15	1.82461	0.1893	9.63872	5.48696e-22	9.05869e-21	1547.45	933.439	1371.48	669.174	1353.16	1122.2	1189.62	568.681	1556.57	1233.98	1402.54	607.789	744.675	667.421	Nontarget	38.5425
Tbc1d8b	111.993	-0.723583	0.292221	-2.47615	0.0132809	0.0274453	151.254	49.5631	133.153	108.632	115.778	59.5453	129.799	115.842	127.284	57.5327	172.964	130.759	113.705	102.083	Nontarget	13.5019
Camta1	267.092	-0.861639	0.261144	-3.29948	0.000968642	0.00254415	210.011	241.391	235.681	232.473	212.019	289.482	233.271	147.436	209.15	298.575	185.907	302.684	489.305	451.912	Nontarget	54.0848
Ccnd3	188.652	0.0181948	0.304091	0.0598334	0.952288	0.967034	125.657	207.431	145.137	160.776	157.748	266.58	192.862	229.052	145.788	221.203	182.965	280.89	151.917	173.123	Nontarget	50.4792
Xlr4a	18.6486	1.45344	1.44554	1.00547	0.314672	0.418768	20.9429	22.9459	0	0	17.3667	40.3076	3.0613	15.7967	8.41086	54.5569	15.2961	0	30.7563	31.6398	Nontarget	21.7241
Xlr3b	36.2284	-0.901355	1.27666	-0.706029	0.48017	0.58494	24.4334	89.0301	1.33153	21.7264	31.839	44.888	2.44904	0	10.6538	55.5488	17.6494	41.165	89.4728	77.0101	Nontarget	41.4011
Gm15107	318.628	1.44782	1.23389	1.17337	0.240647	0.3374	188.486	957.303	279.622	169.466	97.6878	697.138	129.799	0	114.948	524.738	170.61	77.487	559.205	494.297	Nontarget	192.076
Nacad	6.97743	-0.655711	0.993381	-0.660079	0.509203	0.611962	5.81747	13.7675	9.32073	6.51793	2.89445	8.24474	3.0613	5.26557	5.04652	6.94361	2.35325	7.26441	7.45607	13.7305	Nontarget	1.22628
Dact3	45.7172	-0.796366	0.653541	-1.21854	0.223019	0.316798	28.5056	23.8637	34.6198	39.1076	41.9696	15.5734	63.0627	134.272	44.2972	14.8792	65.8909	101.702	16.7762	15.5214	Nontarget	3.73225
Neurl1b	130.673	-1.63185	0.442969	-3.68388	0.000229711	0.000678136	83.1898	124.826	78.5604	152.085	117.225	93.4404	97.3492	376.488	81.8657	89.2749	112.956	154.974	130.481	136.708	Nontarget	12.8697
Nup62cl	128.501	0.457525	0.349547	1.30891	0.190566	0.278304	40.1406	271.679	49.2667	69.5246	60.0599	305.971	44.6949	118.475	73.4549	362.059	50.0065	94.4373	133.277	125.962	Nontarget	104.726
Zfp800	209.397	-0.369298	0.195459	-1.88939	0.0588398	0.102605	264.695	116.565	248.997	208.574	272.802	116.342	282.864	244.849	241.111	117.049	261.799	176.767	199.45	179.69	Nontarget	36.8277
Zfp72	17.6596	1.79929	0.668949	2.68972	0.00715112	0.0157551	19.7794	15.6032	25.2991	17.3811	20.9848	19.2377	31.2252	5.26557	22.9897	16.863	21.1792	9.68588	13.9801	7.76071	Nontarget	5.72051
Nckap5	369.568	1.0972	0.270355	4.05838	4.9415e-05	0.000161326	552.078	245.98	464.705	351.968	431.997	310.552	349.6	489.698	506.334	341.229	438.292	375.328	162.17	154.02	Nontarget	14.3577
Sap25	10.4883	-2.99124	1.76742	-1.69243	0.0905637	0.148448	0	21.1102	0	0	7.23613	12.8251	0	34.2262	4.48579	13.8872	1.76494	16.9503	15.8441	18.5063	Nontarget	10.9327
Jcad	493.547	1.1193	0.277217	4.03762	5.39956e-05	0.000175207	778.959	155.114	659.109	475.809	723.613	133.748	686.955	610.806	1009.86	194.421	796.574	462.501	101.589	120.589	Nontarget	10.0821
Mfap1b	966.595	5.09179	0.254744	19.9878	7.02903e-89	3.31891e-86	1677.18	893.054	1260.96	256.372	1699.04	909.669	1413.09	289.606	1838.05	1115.94	1518.43	363.22	170.558	127.156	Nontarget	52.026
Nfix	1098.86	0.817375	0.161451	5.06269	4.13372e-07	1.75704e-06	1307.77	314.818	1316.89	1727.25	1408.88	323.377	1473.1	1971.95	1295.27	321.39	1457.84	2210.8	130.481	124.171	Nontarget	13.4305
Slc25a53	8.64404	-2.64743	1.24997	-2.11799	0.0341756	0.06376	8.72621	6.42485	1.33153	15.2085	4.34168	1.83216	3.67356	0	5.04652	9.91944	5.29481	38.7435	12.1161	8.35769	Nontarget	2.3659
Sh3d19	524.32	2.04511	0.149234	13.7041	9.59896e-43	5.50807e-41	741.146	335.01	790.93	471.463	777.161	364.601	752.467	463.37	716.606	411.657	774.807	445.55	150.053	145.663	Nontarget	14.9534
Ndor1	114.083	-0.70105	0.263828	-2.65722	0.00787871	0.0171977	75.0454	148.689	55.9244	97.7689	86.11	166.727	67.3485	115.842	74.0156	156.727	87.0701	135.602	156.577	173.72	Nontarget	22.1844
Efr3b	46.4817	-2.05741	0.481337	-4.27437	1.91681e-05	6.63258e-05	29.6691	48.6453	25.2991	36.9349	17.3667	61.3775	29.3884	50.0229	27.4755	25.7905	31.1805	62.9582	110.909	93.7255	Nontarget	9.46578
Pigyl	34.885	1.56132	0.579333	2.69503	0.00703833	0.0155315	48.8668	15.6032	58.5874	32.5896	71.6377	10.0769	54.4911	18.4295	65.044	7.93555	58.2429	31.4791	4.66004	10.7456	Nontarget	9.22119
Mkl1	242.169	1.08525	0.254402	4.26588	1.99112e-05	6.87674e-05	123.33	470.85	138.479	141.222	164.26	508.425	137.146	173.764	164.853	626.908	126.487	174.346	198.518	241.776	Nontarget	27.4614
Snrpn	52.6437	-0.5816	0.541828	-1.0734	0.28309	0.384448	48.8668	41.3026	74.5658	52.1434	62.2308	33.895	58.1646	76.3507	48.2223	52.573	30.5922	21.7932	73.6287	62.6826	Nontarget	23.7733
Gm15114	21.7332	-1.85803	1.21959	-1.52348	0.127638	0.19922	9.30795	18.3567	0	41.2802	24.6029	21.986	16.531	0	15.1396	25.7905	12.9429	31.4791	60.5806	26.267	Nontarget	17.1165
Sdr39u1	12.7088	-1.36094	1.39574	-0.975071	0.329525	0.434546	8.14446	20.1924	17.3099	15.2085	0	25.6503	6.12259	0	1.68217	9.91944	4.11818	16.9503	25.1642	27.461	Nontarget	14.8065
Terf2	190.717	1.10094	0.251116	4.38419	1.1642e-05	4.14913e-05	210.011	169.8	264.975	112.977	214.19	170.391	221.638	152.701	256.251	189.461	261.799	179.189	147.257	119.396	Nontarget	35.9065
Lhx6	27.2012	0.86394	0.732579	1.17931	0.238274	0.334697	16.8707	40.3848	30.6252	39.1076	17.3667	35.7272	22.6536	36.859	22.429	49.5972	27.6507	0	24.2322	17.3123	Nontarget	3.80279
Mtg2	32.7551	-0.375124	0.588311	-0.637627	0.523716	0.625718	19.7794	49.5631	23.9676	36.9349	34.0098	32.0629	26.3271	71.0851	25.2326	38.6858	22.3558	12.1073	35.4163	31.0428	Nontarget	16.6577
Bin1	107.862	1.30925	0.419812	3.11866	0.00181673	0.0045209	109.368	93.6193	139.811	39.1076	162.089	98.0208	176.331	113.21	105.977	99.1944	142.96	99.2802	62.4446	68.6524	Nontarget	19.1737
Tns3	1055.35	1.19925	0.216129	5.54876	2.87698e-08	1.39428e-07	1179.78	1198.69	1111.83	751.734	1065.16	1464.81	901.858	995.192	943.699	1581.16	1117.79	1089.66	673.842	699.658	Nontarget	53.4282
Greb1l	228.977	-0.117372	0.383938	-0.305705	0.75983	0.823849	314.143	47.7275	335.546	406.284	268.461	41.2237	293.884	579.212	284.848	40.6697	271.212	254.254	41.9404	26.267	Nontarget	2.56467
Rusc1	19.8006	-1.1764	0.646891	-1.81855	0.0689807	0.117523	4.65398	44.0561	7.9892	34.7623	4.34168	26.5664	8.57163	23.695	13.4574	32.7341	8.82468	19.3718	26.0962	22.0882	Nontarget	6.25496
Prr5l	12.6735	-1.28553	0.809965	-1.58714	0.11248	0.17841	7.56271	16.521	10.6523	15.2085	2.17084	10.993	9.18389	5.26557	11.2145	18.8469	6.47143	21.7932	24.2322	17.3123	Nontarget	3.27261
1600012H06Rik	89.1669	-2.96286	0.471572	-6.28294	3.32239e-10	1.97219e-09	80.8628	38.5491	81.2235	271.58	44.1404	36.6433	63.675	94.7802	67.8476	26.7825	66.4792	181.61	95.0649	99.0983	Nontarget	25.4709
Pars2	38.7859	-1.21113	0.383804	-3.15558	0.0016018	0.00402116	29.0874	48.6453	26.6307	43.4528	21.7084	41.2237	30.613	63.1868	25.7933	37.6939	23.5325	55.6938	43.8044	51.937	Nontarget	10.1242
Ndufv3	84.6254	1.24977	0.461037	2.71078	0.00671253	0.0149121	117.513	52.3166	78.5604	30.417	128.08	87.0278	138.371	39.4917	130.649	47.6133	128.84	70.2226	56.8525	78.801	Nontarget	203.495
Fetub	5.43386	-3.04803	1.43171	-2.12894	0.0332592	0.0622049	1.74524	8.26052	0	0	1.44723	7.32866	2.44904	0	2.80362	1.98389	1.17662	14.5288	15.8441	18.5063	Nontarget	9.1583
Zfp991	583.394	1.0776	0.311998	3.45386	0.000552627	0.00152085	673.081	388.245	905.442	543.161	674.408	401.244	1047.58	421.245	749.128	321.39	1016.01	355.956	279.603	391.02	Nontarget	96.0559
Rbck1	228.205	0.124403	0.228956	0.543351	0.586888	0.681747	199.539	251.487	222.366	232.473	269.908	196.042	265.108	234.318	218.122	232.115	237.678	186.453	221.818	227.448	Nontarget	56.6149
Wbp1	52.4821	-2.48528	0.505662	-4.91489	8.8832e-07	3.62926e-06	40.1406	25.6994	51.9298	130.359	48.4821	24.7342	58.1646	78.9835	38.1292	13.8872	47.6533	41.165	66.1726	69.2494	Nontarget	39.447
Pth1r	35.0926	0.23937	0.507088	0.472048	0.636893	0.724325	22.6881	67.002	18.6415	13.0359	25.3265	48.5523	36.7356	31.5934	27.4755	50.5891	20.0026	24.2147	47.5324	57.9068	Nontarget	15.0051
Rnaset2a	37.8388	-1.27254	1.93234	-0.658549	0.510186	0.612704	70.3914	12.8497	17.3099	13.0359	36.1807	57.7132	20.2046	0	45.4187	0	39.4169	87.1729	66.1726	63.8766	Nontarget	63.4427
Rsph3b	238.76	2.51238	0.318197	7.89566	2.88775e-15	2.799e-14	269.931	238.637	304.921	160.776	419.696	229.937	358.172	144.803	399.236	218.228	258.857	167.081	102.521	69.8464	Nontarget	39.5555
Arid1b	753.833	1.15926	0.207263	5.59318	2.22949e-08	1.09494e-07	915.088	547.03	957.372	721.317	916.095	593.621	817.366	1176.85	935.849	643.771	914.825	893.522	253.506	267.446	Nontarget	14.1115
Mcc	144.91	-0.831185	0.396341	-2.09715	0.0359806	0.0667207	169.288	89.0301	83.8866	241.163	162.813	53.1328	165.31	189.56	171.021	68.4441	175.905	300.262	71.7647	87.1587	Nontarget	6.33584
1600014C10Rik	35.9668	1.34547	0.525436	2.56067	0.0104469	0.0221256	37.2318	19.2746	59.919	19.5538	61.5071	18.3216	49.593	42.1245	56.6331	19.8389	62.361	29.0576	16.7762	11.3426	Nontarget	3.16042
Dusp5	28.299	1.91661	0.68735	2.78841	0.00529678	0.0120289	15.1254	68.8377	23.9676	8.69057	15.1959	46.7202	14.082	0	17.3825	69.4361	14.1195	7.26441	49.3965	45.9673	Nontarget	34.9389
Sdccag3	256.259	-0.565565	0.283538	-1.99467	0.046079	0.0829071	144.855	363.463	151.795	267.235	203.335	348.111	244.904	260.646	169.339	330.317	150.608	203.403	368.143	381.469	Nontarget	126.673
Zfp467	150.179	-0.490056	0.350117	-1.39969	0.161605	0.242923	201.284	38.5491	231.687	325.896	159.919	54.9649	152.453	231.685	138.499	47.6133	172.964	261.519	48.4645	37.0126	Nontarget	21.1669
Tspyl5	53.5855	-0.069011	0.385851	-0.178854	0.858052	0.900337	69.2279	23.8637	73.2343	65.1793	74.5322	31.1468	63.675	86.8818	71.7727	25.7905	67.0675	33.9006	31.6883	32.2368	Nontarget	5.28024
Smcr8	196.547	-0.89871	0.209995	-4.27967	1.87173e-05	6.48203e-05	219.9	108.305	203.724	193.365	232.28	145.657	202.658	181.662	187.843	130.937	217.675	222.775	246.982	257.894	Nontarget	26.9329
Ndufaf6	19.6123	0.825047	0.788745	1.04603	0.295549	0.397773	18.0342	26.6172	27.9622	28.2443	17.3667	21.986	19.5923	0	16.261	36.7019	8.82468	12.1073	22.3682	18.5063	Nontarget	17.8281
Arfgef2	229.485	0.884064	0.304623	2.90216	0.003706	0.0086873	266.44	238.637	210.382	191.193	192.481	340.782	227.76	110.577	282.605	307.503	204.732	188.875	231.138	219.688	Nontarget	16.3267
Chmp6	52.0835	0.227508	0.46595	0.488267	0.625361	0.714527	43.631	41.3026	58.5874	34.7623	62.2308	47.6363	65.5117	86.8818	45.4187	51.5811	64.7143	46.0079	30.7563	50.1461	Nontarget	16.6177
Gm595	54.5224	4.29239	0.610676	7.02891	2.08159e-12	1.53985e-11	55.266	107.387	51.9298	6.51793	45.5876	120.923	51.4298	0	49.3437	114.074	45.8883	9.68588	58.7166	46.5642	Nontarget	19.8913
Cisd3	20.8409	-0.757397	0.64362	-1.17678	0.239285	0.335832	6.98097	52.3166	9.32073	6.51793	7.23613	32.9789	9.18389	10.5311	7.28942	29.7583	5.88312	12.1073	50.3285	51.3401	Nontarget	64.6201
Ppp1r3d	17.3677	-2.32546	1.04869	-2.21749	0.0265899	0.0511317	4.07223	18.3567	7.9892	4.34528	2.89445	32.0629	5.51033	42.1245	5.04652	23.8066	7.64805	0	39.1444	50.1461	Nontarget	9.18544
Magea10	16.3211	1.74551	1.2545	1.3914	0.164104	0.245895	5.23572	30.2886	11.9838	2.17264	10.1306	46.7202	3.0613	0	3.36435	30.7503	3.52987	2.42147	46.6004	32.2368	Nontarget	16.3026
Zbtb34	178.669	-1.49661	0.186909	-8.00717	1.1738e-15	1.1785e-14	169.288	107.387	161.115	291.134	144.723	117.258	156.738	326.465	149.713	114.074	150.02	283.312	167.762	162.378	Nontarget	16.8746
Myom3	26.7038	-0.0161088	0.660744	-0.0243799	0.98055	0.98737	23.8516	18.3567	30.6252	28.2443	42.6932	8.24474	32.4497	50.0229	48.2223	7.93555	31.7688	29.0576	7.45607	14.9244	Nontarget	1.16675
Zfp992	167.448	-0.601616	0.423724	-1.41983	0.155657	0.235459	190.231	97.2906	229.024	238.991	178.733	96.1886	217.964	136.905	200.179	90.2669	207.674	60.5367	213.43	186.854	Nontarget	41.9921
Fthl17b	16.323	2.30061	1.9138	1.20211	0.229319	0.323825	8.72621	38.5491	0	0	0	33.895	0	0	5.60724	41.6616	1.76494	0	41.0084	57.3098	Nontarget	54.7846
Fthl17c	5.91621	3.73225	6.02309	0.619656	0.535484	0.636831	0	22.9459	14.6469	0	0	15.5734	11.0207	0	0	0	0	0	18.6402	0	Nontarget	10.3411
Mpzl3	25.6344	0.213058	0.813117	0.262027	0.793301	0.84998	19.1977	40.3848	18.6415	23.8991	13.025	25.6503	14.6942	0	21.8682	52.573	8.82468	2.42147	63.3766	54.325	Nontarget	11.7697
Ccnyl1	117.096	0.755915	0.339393	2.22726	0.0259302	0.0500085	93.0795	151.443	106.523	49.9708	102.03	167.643	144.493	71.0851	80.1836	182.518	97.0714	72.6441	169.626	151.035	Nontarget	41.1849
Purg	80.2596	0.449134	0.341482	1.31525	0.188426	0.275715	101.224	50.481	81.2235	93.4236	115.778	39.3915	108.982	131.639	109.341	50.5891	98.8364	70.2226	37.2803	35.2217	Nontarget	18.4057
Zbtb3	16.361	1.31392	0.741328	1.77238	0.0763313	0.128392	15.1254	14.6854	26.6307	2.17264	15.1959	23.8181	14.6942	10.5311	11.7752	25.7905	19.4143	9.68588	18.6402	20.8942	Nontarget	5.82409
Pwwp2b	33.6009	2.13817	0.665877	3.21107	0.00132244	0.00337679	40.1406	14.6854	55.9244	36.9349	43.4168	18.3216	42.8582	63.1868	61.6797	25.7905	37.0636	19.3718	7.45607	3.58187	Nontarget	1.34321
Yy2	64.1896	-0.632299	0.360646	-1.75324	0.079561	0.132958	31.9961	98.2084	25.2991	54.3161	49.2057	98.0208	45.9194	34.2262	40.9329	85.3072	39.4169	50.8509	126.753	118.202	Nontarget	34.0787
Atxn7l3	282.251	-0.66308	0.218293	-3.03757	0.00238498	0.0057979	183.832	338.681	198.398	280.271	256.159	306.887	252.251	371.222	206.347	319.406	228.265	288.155	355.095	366.544	Nontarget	58.0229
Pik3c2b	217.985	-0.997539	0.196147	-5.08567	3.6633e-07	1.56839e-06	134.384	292.79	118.506	228.127	125.909	298.643	146.942	186.928	116.631	331.309	119.427	246.99	339.251	365.947	Nontarget	26.7004
Ajap1	4.60427	-0.0129146	1.31605	-0.00981313	0.99217	0.994769	5.23572	7.34269	1.33153	2.17264	2.17084	6.41257	4.28582	0	2.2429	4.95972	4.70649	4.84294	13.9801	4.77582	Nontarget	2.1418
Gm6890	40.7622	0.765015	0.626605	1.22089	0.222128	0.31588	20.3611	92.7014	18.6415	26.0717	49.9293	91.6082	20.8168	26.3278	19.0646	64.4763	17.6494	12.1073	57.7845	53.131	Nontarget	66.6704
Rhox2b	3.6131	-1.20048	3.56868	-0.336393	0.736574	0.804962	0	0	0	0	0	10.993	0	10.5311	4.48579	8.92749	3.52987	0	12.1161	0	Nontarget	7.6342
Zfp831	23.4655	0.907515	0.532939	1.70285	0.0885965	0.145759	16.2889	51.3988	13.3153	17.3811	15.9195	54.0488	13.4697	18.4295	14.5788	39.6777	14.1195	7.26441	25.1642	27.461	Nontarget	1.61137
Sh2d5	45.24	-1.18481	0.514366	-2.30344	0.0212539	0.0418244	15.7072	77.0982	10.6523	39.1076	20.2612	68.7061	25.1026	5.26557	19.6253	76.3797	20.5909	46.0079	104.385	104.471	Nontarget	19.1226
Rnf39	12.5441	0.484033	0.836098	0.578918	0.562644	0.660229	10.4714	18.3567	3.9946	6.51793	7.23613	22.902	4.28582	26.3278	11.2145	30.7503	4.70649	12.1073	8.38808	8.35769	Nontarget	4.63434
Myof	290.021	0.758773	0.306727	2.47377	0.0133695	0.0276147	374.645	242.309	351.525	175.984	340.822	319.713	288.374	276.442	232.14	373.963	332.396	239.725	252.574	259.685	Nontarget	22.0984
Myh3	68.9875	3.72058	0.438862	8.47778	2.2953e-17	2.68641e-16	66.9009	133.086	50.5982	30.417	80.3211	151.154	52.6543	7.89835	58.876	179.542	62.361	26.6362	30.7563	34.6247	Nontarget	3.05375
Pnmal2	88.0234	2.51321	0.478105	5.25661	1.46736e-07	6.57528e-07	149.509	11.9319	150.463	47.7981	171.496	21.0699	171.433	60.554	149.153	21.8228	170.61	89.5944	12.1161	4.77582	Nontarget	1.23553
Dnajc28	128.311	1.3836	0.321829	4.29917	1.71436e-05	5.96577e-05	207.102	65.1663	186.415	115.15	180.18	44.888	225.924	97.413	238.308	67.4522	198.849	72.6441	41.9404	54.9219	Nontarget	9.2298
Gm15093	139.165	1.23902	3.18775	0.388682	0.697512	0.774149	206.52	0	1.33153	0	2.89445	249.174	206.331	0	173.264	382.89	114.132	130.759	87.6088	393.408	Nontarget	86.294
Srp54b	1172.99	2.79786	0.156496	17.8781	1.74776e-71	4.31097e-69	1721.97	1068.36	1609.82	730.008	1668.65	1119.45	1617.59	542.353	1697.87	1283.58	1782	753.077	411.016	416.093	Nontarget	91.3569
Srp54c	356.188	1.43095	0.286856	4.9884	6.0882e-07	2.53819e-06	466.561	283.611	379.487	141.222	494.228	422.314	520.42	202.724	486.148	248.978	510.655	174.346	346.707	309.234	Nontarget	100.261
1700047I17Rik2	269.524	1.21404	0.268836	4.51592	6.30423e-06	2.31725e-05	366.501	186.321	306.252	184.675	407.394	157.566	468.378	186.928	393.628	160.695	409.465	285.733	124.889	134.917	Nontarget	23.8872
Msl2	271.967	0.285873	0.270818	1.05559	0.291155	0.39269	294.946	102.798	392.802	304.17	369.043	145.657	438.378	223.787	374.003	154.743	417.701	278.469	152.849	158.199	Nontarget	24.3843
Bicral	294.104	0.271967	0.270578	1.00513	0.314833	0.418918	285.056	270.762	335.546	323.724	273.526	282.153	287.15	476.534	344.285	283.696	309.452	234.883	212.498	198.197	Nontarget	19.85
Zbtb42	11.4571	-0.796174	0.743088	-1.07144	0.283972	0.385286	7.56271	13.7675	5.32613	13.0359	8.68336	10.993	4.28582	31.5934	7.85014	17.855	7.64805	14.5288	6.52406	10.7456	Nontarget	1.4561
Adat3	4.2015	-1.85219	1.75602	-1.05477	0.291532	0.393134	0	6.42485	1.33153	0	0.723613	11.9091	0	2.63278	0.560724	4.95972	0.588312	0	11.1841	18.5063	Nontarget	7.2593
Psmg4	103.17	1.14945	0.335115	3.43002	0.000603528	0.00164656	111.114	117.483	86.5496	93.4236	150.512	91.6082	119.391	86.8818	126.724	120.025	101.778	125.916	56.8525	56.1159	Nontarget	160.601
Zcchc24	156.197	0.789337	0.376268	2.09781	0.0359221	0.0666271	168.707	28.4529	213.045	310.688	228.662	32.9789	254.088	260.646	199.618	25.7905	210.027	227.618	12.1161	14.3275	Nontarget	2.00365
Foxi3	12.4794	0.27223	0.996099	0.273296	0.784625	0.843312	1.74524	34.8778	9.32073	8.69057	5.06529	30.2307	4.28582	0	1.68217	22.8147	5.88312	4.84294	27.9603	17.3123	Nontarget	14.8676
Akap5	112.577	-1.18694	0.400472	-2.96386	0.00303809	0.00724525	132.057	39.4669	137.148	173.811	180.18	26.5664	150.616	76.3507	144.667	29.7583	141.783	200.982	76.4247	66.2645	Nontarget	7.49437
F830016B08Rik	52.5248	-1.0584	1.23113	-0.859699	0.389955	0.497637	95.4065	31.2064	42.609	112.977	50.6529	0	17.1433	68.4524	99.2482	1.98389	64.126	123.495	14.9121	13.1335	Nontarget	3.18858
D3Ertd254e	209.629	-1.31514	0.23305	-5.64314	1.66973e-08	8.31642e-08	244.334	93.6193	263.643	284.616	230.109	106.266	248.577	202.724	217	71.4199	262.975	280.89	220.886	207.748	Nontarget	23.3227
Pabpc4l	26.6176	0.753078	0.672642	1.11958	0.262892	0.361865	31.9961	19.2746	31.9568	21.7264	34.0098	19.2377	63.675	10.5311	21.8682	15.8711	36.4753	26.6362	14.9121	24.4761	Nontarget	2.94385
Lbhd2	9.28821	-0.365153	1.17626	-0.310437	0.756229	0.820904	1.16349	23.8637	0	4.34528	1.44723	13.7412	7.95937	7.89835	4.48579	26.7825	1.76494	2.42147	18.6402	15.5214	Nontarget	21.9922
Clec2l	10.2525	-2.33305	0.960909	-2.42796	0.0151839	0.0309751	4.07223	6.42485	6.65766	30.417	3.61807	10.0769	6.12259	28.9606	2.2429	14.8792	4.70649	2.42147	13.9801	8.95466	Nontarget	5.8715
Ccdc8	209.03	1.59665	0.490599	3.25449	0.00113598	0.00294296	271.094	18.3567	263.643	182.502	394.369	32.9789	339.804	410.714	320.174	35.71	310.04	326.898	11.1841	8.95466	Nontarget	1.5446
Isoc2a	39.9048	1.00574	0.488384	2.05932	0.039464	0.0722319	37.8136	33.9599	42.609	19.5538	53.5474	42.1398	55.7156	60.554	44.2972	48.6052	39.4169	26.6362	25.1642	28.6549	Nontarget	18.5974
Acbd5	311.518	1.67558	0.31793	5.27028	1.36216e-07	6.11881e-07	379.881	126.661	474.026	158.603	491.334	170.391	499.604	236.95	688.009	171.606	498.888	225.197	124.889	115.217	Nontarget	24.7356
Cnnm2	44.1495	-3.04833	0.57871	-5.26745	1.38331e-07	6.21042e-07	50.612	13.7675	55.9244	106.459	22.432	7.32866	26.9394	76.3507	28.0362	10.9114	47.0649	101.702	33.5523	37.0126	Nontarget	6.87152
Prrt2	47.8567	-3.09293	0.50083	-6.17562	6.59036e-10	3.78167e-09	16.8707	15.6032	27.9622	110.805	28.2209	24.7342	25.7149	126.374	29.7184	37.6939	37.0636	70.2226	58.7166	60.2947	Nontarget	14.4679
Smyd4	136.322	-1.43328	0.291809	-4.91169	9.02947e-07	3.68538e-06	63.4104	177.142	55.9244	182.502	71.6377	188.713	49.593	136.905	77.3799	225.171	74.1273	215.511	184.538	205.957	Nontarget	33.5658
Phldb3	7.49135	2.41749	1.17905	2.05037	0.0403285	0.0736237	13.3802	7.34269	2.66307	2.17264	15.1959	7.32866	10.4084	0	11.7752	7.93555	9.41299	4.84294	4.66004	7.76071	Nontarget	1.77776
Kif19a	29.5218	1.57412	0.524895	2.99891	0.00270944	0.00651859	11.0532	76.1804	17.3099	17.3811	13.7487	87.9439	12.8574	10.5311	13.4574	80.3474	10.0013	14.5288	20.5042	27.461	Nontarget	4.11345
Steap2	45.5818	-2.21324	0.485611	-4.55764	5.1731e-06	1.9233e-05	52.939	22.0281	43.9406	78.2151	29.6682	18.3216	27.5517	50.0229	37.5685	34.718	42.9468	43.5864	82.0168	74.6222	Nontarget	5.34942
Zfp980	139.581	1.1361	0.382499	2.97022	0.00297588	0.00710891	107.041	242.309	63.9136	67.3519	136.763	266.58	83.2673	36.859	113.266	269.809	87.6585	62.9582	181.742	234.612	Nontarget	42.5055
Zglp1	13.2849	-0.859801	0.929674	-0.924841	0.355049	0.461568	0.581747	42.2204	0	2.17264	3.61807	30.2307	2.44904	2.63278	2.80362	29.7583	4.11818	12.1073	27.0283	26.267	Nontarget	21.0221
Tfe3	279.464	0.629966	0.174344	3.61335	0.000302267	0.000874982	328.105	224.87	339.541	271.58	328.521	235.433	323.885	289.606	344.845	252.946	311.217	322.055	150.053	189.839	Nontarget	32.2838
Zfp938	19.7707	-1.19761	0.625101	-1.91586	0.0553831	0.0973992	13.3802	13.7675	15.9784	10.8632	18.0903	15.5734	23.8781	18.4295	22.9897	17.855	11.1779	31.4791	31.6883	31.6398	Nontarget	13.2005
Zfp185	34.5743	-1.1433	0.447863	-2.5528	0.0106861	0.0225859	29.0874	42.2204	25.2991	54.3161	26.0501	29.3146	26.9394	18.4295	30.8398	27.7744	27.0623	41.165	57.7845	47.7582	Nontarget	9.99666
Bach2	109.421	-1.16131	0.387238	-2.99897	0.00270892	0.00651859	107.041	60.5772	63.9136	149.912	112.884	79.6991	107.758	76.3507	123.359	83.3233	133.547	130.759	139.801	162.975	Nontarget	11.1955
Cenpw	8.71965	-2.89685	1.66168	-1.74332	0.0812772	0.135396	0.581747	6.42485	0	0	7.23613	21.0699	1.22452	13.1639	5.04652	0.991944	4.70649	19.3718	19.5722	22.6851	Nontarget	13.558
Bcan	154.379	-0.27771	0.649975	-0.427263	0.669188	0.750424	250.151	65.1663	219.703	580.095	123.738	38.4754	101.023	302.77	103.173	35.71	109.426	184.032	25.1642	22.6851	Nontarget	5.5661
Sec61g	127.836	-0.427493	0.313552	-1.36339	0.17276	0.256103	84.3533	178.978	111.849	99.9415	110.713	136.496	130.411	86.8818	109.902	114.074	102.366	133.181	201.314	189.242	Nontarget	295.972
Nos1ap	76.9988	0.762944	0.347129	2.19787	0.0279584	0.0534275	51.7755	141.347	53.2613	60.834	61.5071	135.58	41.6336	86.8818	57.1939	162.679	41.7701	50.8509	56.8525	75.8161	Nontarget	7.8734
Mgat1	91.8103	-1.13615	0.340263	-3.33903	0.00084071	0.00223461	73.3001	89.9479	94.5388	149.912	89.7281	72.3705	63.0627	78.9835	68.4084	84.3152	73.539	94.4373	113.705	139.096	Nontarget	25.7368
Pfdn4	67.1128	1.06174	0.451866	2.34968	0.0187896	0.0374974	98.897	33.0421	55.9244	43.4528	100.582	49.4684	109.594	34.2262	117.752	42.6536	103.543	70.2226	43.8044	36.4156	Nontarget	44.1216
Cdca2	236.776	1.82365	0.269763	6.76021	1.37796e-11	9.39631e-11	143.11	458	154.458	76.0425	152.682	509.342	187.351	94.7802	135.135	602.11	185.318	108.966	239.526	268.043	Nontarget	47.1615
Acvr1	81.3998	-2.64571	0.406615	-6.50667	7.68358e-11	4.84837e-10	59.3382	35.7956	61.2505	275.926	56.4419	33.895	63.675	163.233	56.0724	21.8228	67.0675	121.073	64.3086	59.6978	Nontarget	14.0847
Akt2	605.142	0.691637	0.199699	3.46339	0.000533417	0.00147194	606.762	583.744	623.157	477.981	688.88	567.971	721.241	626.602	634.179	673.53	710.681	743.391	400.764	413.108	Nontarget	54.8922
Lnpk	57.1182	-3.5915	0.479094	-7.49644	6.55765e-14	5.6093e-13	52.3572	15.6032	59.919	152.085	44.864	11.9091	42.2459	52.6557	51.5866	14.8792	47.6533	75.0655	92.2689	86.5617	Nontarget	7.52766
Gigyf2	1101.05	1.97332	0.186772	10.5654	4.31064e-26	9.34877e-25	1560.83	953.631	1259.63	821.259	1400.92	1157.93	1318.81	808.264	1673.76	1245.88	1420.18	762.763	544.293	486.537	Nontarget	54.9329
Cbx5	1169.01	-0.997034	0.163302	-6.10546	1.02505e-09	5.7717e-09	1467.17	317.571	1386.13	1418.74	1583.27	342.615	1692.28	1727.11	1555.45	297.583	1780.23	1496.47	634.698	666.824	Nontarget	47.707
Ppm1h	44.2801	-0.510035	0.452391	-1.12742	0.259564	0.358269	29.6691	37.6313	55.9244	39.1076	38.3515	49.4684	29.3884	63.1868	33.6435	47.6133	35.887	84.7514	40.0764	35.2217	Nontarget	4.10225
Bex3	447.675	2.85068	0.258552	11.0256	2.87736e-28	7.08662e-27	756.271	94.5371	801.583	297.652	819.13	99.8529	936.144	389.652	698.102	123.993	845.992	334.163	36.3483	34.0277	Nontarget	32.8266
Ndufaf8	37.9131	0.882833	0.538592	1.63915	0.101182	0.163087	40.1406	32.1243	41.2775	43.4528	54.271	35.7272	61.2259	10.5311	49.9045	17.855	59.4195	26.6362	30.7563	27.461	Nontarget	108.496
Zfp945	106.887	-1.01769	0.317519	-3.20513	0.00135001	0.00344188	127.403	44.0561	150.463	147.74	163.537	31.1468	147.554	81.6163	136.817	39.6777	125.899	104.123	106.249	90.1436	Nontarget	11.2344
Itsn1	990.011	1.95099	0.197202	9.89336	4.44862e-23	7.95648e-22	1522.43	748.036	1209.03	588.786	1458.08	742.942	1386.16	874.084	1464.61	879.854	1396.06	837.828	382.124	370.126	Nontarget	38.6408
Keap1	136.106	0.6226	0.286596	2.17239	0.0298259	0.0565192	165.798	79.8517	147.8	126.013	167.878	79.6991	182.453	165.865	209.15	116.057	179.435	138.024	76.4247	71.0403	Nontarget	13.3985
Gprc5c	30.0296	-4.76694	0.802329	-5.94138	2.8264e-09	1.53497e-08	17.4524	14.6854	21.3045	34.7623	7.23613	14.6573	11.6329	68.4524	3.36435	12.8953	4.11818	36.322	94.1329	79.398	Nontarget	13.1873
Ifnar2	58.2272	-2.03898	0.456048	-4.47097	7.78643e-06	2.83745e-05	72.1366	17.4389	83.8866	143.394	58.6127	10.993	57.5524	63.1868	56.0724	14.8792	58.2429	106.545	38.2124	34.0277	Nontarget	14.6775
Capn1	106.562	0.78372	0.366662	2.13745	0.0325615	0.0611005	162.307	41.3026	157.121	82.5604	140.381	32.0629	138.983	163.233	146.349	53.565	159.432	159.817	26.0962	28.6549	Nontarget	5.2133
Efcab12	13.7184	-1.56084	0.714924	-2.18323	0.0290188	0.0551605	6.98097	18.3567	2.66307	10.8632	3.61807	25.6503	4.89807	10.5311	7.28942	20.8308	4.11818	7.26441	39.1444	29.8489	Nontarget	8.8939
Xlr3a	63.1226	-1.35848	0.604886	-2.24584	0.0247142	0.0478981	20.9429	102.798	21.3045	17.3811	16.6431	122.755	20.2046	81.6163	16.8217	115.065	20.5909	9.68588	160.306	157.602	Nontarget	76.6726
Dnpep	139.399	0.868029	0.342815	2.53206	0.0113394	0.0237993	87.8438	293.707	98.5334	28.2443	65.8488	252.839	90.6144	84.2491	93.0802	279.728	91.1883	92.0158	190.13	203.569	Nontarget	73.6462
Cacna2d1	133.976	-3.1188	0.443624	-7.03028	2.06125e-12	1.52549e-11	186.741	26.6172	155.789	299.825	104.2	15.5734	129.187	308.036	98.6875	28.7664	141.195	164.66	113.705	102.68	Nontarget	10.7367
Crem	31.8096	-1.0798	0.72326	-1.49296	0.135449	0.209728	39.5588	19.2746	45.2721	73.8698	27.4973	21.986	28.7762	23.695	23.5504	9.91944	49.4182	14.5288	36.3483	31.6398	Nontarget	16.1473
Nav2	934.052	1.03931	0.227897	4.56044	5.10457e-06	1.89953e-05	1008.17	1066.53	938.73	773.461	934.909	1131.36	838.183	1358.52	903.327	1241.91	944.829	915.315	511.673	509.819	Nontarget	26.6537
Serac1	127.337	-0.779843	0.23808	-3.27555	0.00105457	0.00275105	89.0073	133.086	98.5334	119.495	86.11	163.063	90.6144	165.865	90.8373	154.743	109.426	130.759	171.49	179.69	Nontarget	20.243
Runx1	33.6906	-0.726318	0.559632	-1.29785	0.194339	0.28279	16.8707	40.3848	15.9784	39.1076	11.5778	35.7272	17.7555	68.4524	33.0827	50.5891	25.2974	67.8011	25.1642	23.8791	Nontarget	2.62937
Pigx	49.5994	-2.54417	0.90782	-2.8025	0.00507076	0.0115553	16.2889	76.1804	37.2829	97.7689	20.2612	50.3845	14.082	10.5311	7.85014	45.6294	14.1195	14.5288	150.985	138.499	Nontarget	135.112
Runx1t1	85.051	1.31758	0.40516	3.25201	0.00114591	0.00296776	104.714	39.4669	101.196	106.459	110.713	48.5523	127.962	76.3507	160.928	46.6214	101.778	123.495	25.1642	17.3123	Nontarget	1.97966
Kctd9	150.595	0.339303	0.316627	1.07162	0.283892	0.38522	167.543	94.5371	206.388	134.704	236.622	92.5243	211.842	213.255	156.442	78.3635	207.674	138.024	75.4927	94.9194	Nontarget	18.469
Cd59a	79.1096	-1.89645	0.704526	-2.69181	0.00710644	0.0156672	86.6803	20.1924	83.8866	306.343	83.2156	8.24474	72.8589	92.1474	98.1267	1.98389	67.0675	152.553	20.5042	13.7305	Nontarget	7.70797
Comt	846.305	-3.19519	0.550447	-5.80472	6.44743e-09	3.36545e-08	475.287	294.625	450.058	3545.75	376.279	94.3564	446.949	1640.22	527.081	84.3152	483.592	2939.66	174.286	315.801	Nontarget	91.6872
Cdc25b	78.2223	0.648072	0.393399	1.64737	0.0994829	0.160819	72.7184	82.6052	71.9028	67.3519	89.7281	84.2795	115.105	68.4524	63.9226	81.3394	78.8338	116.231	44.7364	57.9068	Nontarget	10.5495
Cdkn1a	16.1452	-1.43791	0.772052	-1.86245	0.0625395	0.108042	4.65398	17.4389	3.9946	30.417	11.5778	15.5734	14.082	34.2262	15.1396	10.9114	17.6494	16.9503	14.9121	18.5063	Nontarget	5.46102
Lmna	144.883	2.6072	0.335021	7.7822	7.12746e-15	6.66224e-14	219.9	57.8237	218.371	65.1793	263.395	67.7901	274.292	110.577	241.672	58.5247	268.27	133.181	26.0962	23.2821	Nontarget	7.68302
Atg16l2	30.2353	-0.440996	0.602238	-0.732261	0.464009	0.570297	13.3802	34.8778	19.973	26.0717	18.814	63.2097	28.1639	26.3278	11.2145	45.6294	17.6494	43.5864	47.5324	26.864	Nontarget	11.6681
Ccnb1ip1	31.0159	-0.462544	0.633734	-0.72987	0.46547	0.571667	10.4714	54.1523	15.9784	6.51793	18.0903	65.9579	12.8574	39.4917	7.85014	56.5408	18.826	16.9503	63.3766	47.1612	Nontarget	29.3426
Sprtn	262.16	1.36406	0.211022	6.46408	1.01919e-10	6.34631e-10	204.193	446.068	221.034	184.675	203.335	503.845	212.454	150.069	217.561	492.004	197.673	89.5944	266.554	281.176	Nontarget	40.9624
Lrrc73	17.6128	0.306373	0.632048	0.484731	0.627867	0.716732	9.8897	27.5351	6.65766	8.69057	7.95975	36.6433	11.0207	15.7967	12.8967	44.6375	7.05974	14.5288	22.3682	20.8942	Nontarget	11.2805
Igf1	1180.27	3.18138	0.351703	9.04564	1.48791e-19	2.05595e-18	1653.91	72.509	1840.18	979.862	2351.02	61.3775	2302.09	1434.87	2296.73	75.3877	2155.57	1273.69	13.9801	12.5365	Nontarget	1.38446
Eif2b3	163.893	1.02916	0.317032	3.24624	0.00116938	0.00302353	96.57	316.653	89.2127	43.4528	81.7683	383.838	86.3286	73.7179	120.556	350.156	69.4208	65.3797	255.37	262.073	Nontarget	122.348
Wdfy1	276.767	0.373629	0.2125	1.75825	0.078705	0.131741	274.003	264.337	300.926	206.401	287.275	254.671	328.783	265.911	302.23	295.599	327.69	154.974	320.611	291.325	Nontarget	58.2033
Sco2	6.20777	-4.71639	1.87746	-2.51211	0.0120011	0.0250638	0	10.0962	0	0	2.17084	13.7412	0	21.0623	0	1.98389	1.17662	14.5288	16.7762	5.3728	Nontarget	7.25035
Xlr5b	216.558	0.671917	0.36387	1.84658	0.0648076	0.111505	84.9351	413.944	83.8866	93.4236	138.21	511.174	151.228	71.0851	92.5195	402.729	124.134	72.6441	449.228	342.665	Nontarget	296.588
Lrrfip1	358.785	2.72838	0.212979	12.8106	1.43069e-37	6.40745e-36	491.576	356.12	516.635	180.329	471.072	437.887	472.664	134.272	465.962	464.23	468.884	232.461	156.577	174.317	Nontarget	29.9897
Nedd9	531.887	2.29922	0.31605	7.27486	3.46768e-13	2.78054e-12	945.921	57.8237	987.997	730.008	911.753	52.2167	813.08	679.258	783.892	43.6455	796.574	617.475	13.0481	13.7305	Nontarget	1.88381
Cyth1	85.8013	1.00099	0.311929	3.20903	0.00133185	0.00339978	112.277	52.3166	102.528	95.5963	121.567	67.7901	116.942	100.046	125.042	49.5972	121.192	58.1153	38.2124	39.9975	Nontarget	7.07704
Ifitm1	16.1724	-2.35852	0.814002	-2.89743	0.0037623	0.008813	8.72621	18.3567	10.6523	10.8632	13.025	12.8251	11.6329	52.6557	11.2145	4.95972	5.88312	19.3718	22.3682	23.8791	Nontarget	40.6673
Arhgef10l	50.2086	0.150794	0.466254	0.323417	0.74638	0.813414	62.2469	34.8778	49.2667	80.3878	75.9794	36.6433	48.9807	50.0229	42.615	32.7341	79.4221	46.0079	34.4843	29.2519	Nontarget	4.21133
Arhgef16	23.6217	0.652139	0.579651	1.12505	0.260567	0.359383	11.0532	49.5631	10.6523	6.51793	11.5778	59.5453	7.95937	7.89835	14.0181	54.5569	10.0013	19.3718	36.3483	31.6398	Nontarget	8.414
Bub1	289.305	1.0727	0.292851	3.66296	0.000249322	0.000732626	136.711	501.138	149.132	80.3878	173.667	741.11	143.881	131.639	127.845	659.643	164.727	67.8011	490.237	482.358	Nontarget	80.1259
Gria4	9.00746	-1.48729	0.82282	-1.80755	0.0706762	0.120084	7.56271	7.34269	2.66307	15.2085	5.78891	7.32866	6.73485	7.89835	7.28942	8.92749	10.5896	12.1073	17.7082	8.95466	Nontarget	1.74165
Nfib	831.134	0.337772	0.166798	2.02503	0.0428639	0.0777829	1288.57	170.717	1387.46	923.373	1251.85	179.552	1245.34	1121.57	1136.59	212.276	1274.87	1084.82	178.014	180.884	Nontarget	13.7816
Nemp1	133.447	-3.95084	0.352508	-11.2078	3.73375e-29	9.82547e-28	104.133	67.002	90.5442	221.61	64.4016	43.9719	62.4504	207.99	77.3799	47.6133	70.0091	140.445	357.891	312.816	Nontarget	42.7091
Glb1l3	66.405	-1.63231	0.556117	-2.93519	0.00333348	0.00788678	86.0986	41.3026	58.5874	165.121	44.1404	56.7971	34.2865	65.8196	41.4936	51.5811	44.7117	92.0158	90.4048	57.3098	Nontarget	22.5546
Synj2	318.224	1.49495	0.282747	5.28722	1.24188e-07	5.60747e-07	325.197	382.738	307.584	293.307	320.561	462.621	226.536	313.301	393.628	522.754	284.155	283.312	191.994	147.453	Nontarget	19.0838
Dad1	73.9175	-2.18327	0.325747	-6.70237	2.0507e-11	1.37484e-10	44.7945	82.6052	50.5982	71.6972	39.0751	63.2097	44.0827	105.311	36.4471	65.4683	38.2403	128.338	142.597	122.38	Nontarget	165.981
Boll	72.2613	-3.26613	0.505048	-6.46697	9.99871e-11	6.23307e-10	23.8516	59.6593	29.2937	175.984	17.3667	82.4474	32.4497	63.1868	35.8864	50.5891	31.7688	87.1729	173.354	148.647	Nontarget	133.892
Shank2	58.5417	-0.454108	0.414306	-1.09607	0.273049	0.373306	61.6652	33.0421	61.2505	93.4236	71.6377	39.3915	55.1033	110.577	34.2042	44.6375	59.4195	94.4373	27.9603	32.8338	Nontarget	2.78525
Gnao1	119.499	0.64244	0.295596	2.17337	0.0297525	0.0564059	80.8628	174.389	81.2235	89.0783	85.3864	198.79	93.6757	176.396	90.8373	232.115	82.952	106.545	87.6088	93.1285	Nontarget	11.3561
Mfsd4b5	61.6064	-2.79174	0.623857	-4.47496	7.64251e-06	2.78747e-05	57.593	28.4529	26.6307	175.984	45.5876	8.24474	24.4904	115.842	48.2223	10.9114	50.0065	215.511	25.1642	29.8489	Nontarget	6.29989
Fggy	39.7084	0.223304	0.413674	0.539808	0.58933	0.683697	33.1596	54.1523	39.946	41.2802	36.9043	35.7272	41.6336	36.859	39.8114	49.5972	28.8273	48.4294	39.1444	30.4459	Nontarget	12.6965
Ebf3	34.6703	-0.572919	0.463675	-1.2356	0.216606	0.309279	27.9239	41.3026	18.6415	32.5896	17.3667	40.3076	21.4291	39.4917	26.354	60.5086	30.0039	24.2147	50.3285	54.9219	Nontarget	7.50359
Ppara	33.5066	-1.10308	0.527323	-2.09185	0.0364524	0.0674518	32.5778	5.50702	42.609	45.6255	53.5474	10.0769	43.4704	63.1868	35.8864	9.91944	42.9468	55.6938	14.9121	13.1335	Nontarget	1.21911
Iqschfp	8.40123	4.29453	2.22629	1.929	0.0537306	0.0947567	0	8.26052	14.6469	0	7.23613	30.2307	12.8574	0	11.7752	0	6.47143	0	19.5722	6.56675	Nontarget	3.7715
Schip1	202.073	1.94173	0.267619	7.25558	3.9995e-13	3.18409e-12	275.748	196.417	302.258	156.43	293.063	176.804	282.864	68.4524	263.54	197.397	245.326	159.817	103.453	107.456	Nontarget	44.6272
Slain2	519.021	1.33385	0.173869	7.67159	1.69873e-14	1.53071e-13	803.975	279.94	797.588	388.903	786.568	213.447	832.06	508.127	811.929	268.817	813.047	377.749	190.13	194.018	Nontarget	28.5627
Tec	34.1789	0.622994	0.547987	1.13688	0.255589	0.353757	20.3611	60.5772	18.6415	49.9708	39.0751	53.1328	21.4291	26.3278	28.5969	60.5086	21.7675	21.7932	20.5042	35.8187	Nontarget	7.33635
Sept9	705.732	2.01762	0.223242	9.0378	1.59858e-19	2.20151e-18	1161.75	204.677	1082.54	656.138	1220.74	249.174	1049.41	953.068	1103.51	230.131	1171.33	627.161	81.0848	89.5466	Nontarget	15.284
Csf1	41.555	-3.53212	0.693001	-5.09684	3.45368e-07	1.48248e-06	47.1215	9.17836	26.6307	65.1793	21.7084	7.32866	32.4497	173.764	42.615	1.98389	30.0039	77.487	24.2322	22.0882	Nontarget	4.51703
Ltbp4	267.677	-0.118107	0.719888	-0.164063	0.869682	0.90877	309.489	122.072	260.98	473.636	150.512	34.8111	121.227	1084.71	170.46	27.7744	141.195	818.457	13.0481	19.1033	Nontarget	1.8665
Irak2	21.4783	-1.94179	0.650775	-2.98382	0.00284677	0.00682217	27.9239	9.17836	13.3153	19.5538	20.9848	9.16082	16.531	65.8196	20.7468	9.91944	15.8844	36.322	18.6402	16.7154	Nontarget	3.63539
Glo1	244.082	1.46346	0.361322	4.05029	5.11539e-05	0.000166575	274.585	202.842	350.193	280.271	334.309	246.426	286.537	113.21	325.781	237.075	341.221	116.231	155.645	152.826	Nontarget	102.076
Cutc	18.3182	0.245569	0.710468	0.345644	0.729611	0.798989	6.98097	26.6172	17.3099	21.7264	22.432	17.4056	14.6942	13.1639	22.429	21.8228	20.0026	9.68588	17.7082	24.4761	Nontarget	13.5087
Nde1	122.04	0.00850581	0.34322	0.0247824	0.980229	0.987233	72.1366	152.361	102.528	110.805	120.843	168.559	132.86	144.803	81.305	150.775	103.543	92.0158	135.141	140.887	Nontarget	46.0731
Pdlim7	213.48	0.588851	0.253913	2.31911	0.0203892	0.0403583	134.384	335.928	185.083	160.776	146.894	342.615	189.8	144.803	148.031	351.148	200.026	186.453	216.226	246.552	Nontarget	99.9311
Smarcc2	682.346	1.69113	0.250963	6.73855	1.59979e-11	1.08353e-10	1101.25	292.79	976.013	460.6	1059.37	309.636	953.288	787.202	1073.79	360.076	1107.79	757.92	175.218	137.902	Nontarget	19.6141
Mtcl1	1169.03	2.77753	0.294252	9.43931	3.75242e-21	5.83373e-20	2293.25	237.719	1858.82	942.927	1865.48	258.335	1546.57	1613.9	2070.19	324.366	1864.95	1372.97	59.6486	57.3098	Nontarget	4.84869
Dab2ip	656.962	0.817693	0.226477	3.61049	0.000305615	0.000883589	860.404	446.986	762.968	567.06	803.935	478.195	804.509	963.599	733.427	547.553	825.401	840.25	264.69	298.489	Nontarget	28.061
Fam189a2	61.6792	-2.46819	0.674709	-3.65816	0.000254031	0.000745801	84.3533	18.3567	65.2451	230.3	30.3918	5.49649	47.144	136.905	56.6331	8.92749	37.0636	101.702	17.7082	23.2821	Nontarget	5.26464
Shtn1	618.074	2.69712	0.19868	13.5752	5.62133e-42	3.0966e-40	1092.52	297.379	928.078	482.327	1005.82	366.433	859.612	516.026	1054.16	378.922	927.768	537.566	110.909	95.5164	Nontarget	17.7038
Luzp4	132.696	1.98028	1.12975	1.75286	0.0796265	0.133054	48.8668	315.736	14.6469	15.2085	70.9141	339.866	75.3079	0	67.8476	429.512	23.5325	53.2723	184.538	218.494	Nontarget	73.6942
Nedd4l	167.524	0.659068	0.28977	2.27445	0.022939	0.0448574	92.4978	316.653	103.86	117.323	77.4266	337.118	94.9002	155.334	136.817	365.035	95.3065	128.338	174.286	150.438	Nontarget	13.4724
Zmym4	1231.42	1.70582	0.163477	10.4346	1.72353e-25	3.58729e-24	1036.09	2037.6	1141.12	808.223	1060.82	2293.87	1067.78	563.416	1085	2338.01	1004.25	581.153	1151.03	1071.57	Nontarget	107.155
Gm15127	57.9674	1.64589	2.63108	0.625557	0.531606	0.633404	27.3421	163.375	19.973	0	0	229.02	37.3478	0	17.9432	118.041	0	33.9006	64.3086	100.292	Nontarget	29.5492
Ino80d	634.833	-0.856654	0.286933	-2.98556	0.00283061	0.00678719	812.701	205.595	906.774	536.643	798.869	218.944	758.589	1147.89	817.536	259.889	778.925	849.936	400.764	394.602	Nontarget	19.3917
Stxbp5l	28.3246	-2.60882	0.524895	-4.97017	6.68932e-07	2.77479e-06	27.3421	14.6854	23.9676	36.9349	21.7084	10.0769	27.5517	36.859	28.0362	6.94361	30.5922	19.3718	67.1046	45.3703	Nontarget	3.37957
Jmjd7	32.3968	0.687706	0.572701	1.20081	0.229824	0.324428	31.4143	44.974	19.973	36.9349	18.814	43.9719	36.1233	5.26557	35.8864	45.6294	36.4753	29.0576	32.6203	36.4156	Nontarget	17.7029
Scfd2	84.3731	0.259131	0.333409	0.777218	0.43703	0.54414	61.0834	115.647	62.582	56.4887	57.1655	149.321	54.4911	97.413	71.7727	151.767	49.4182	60.5367	86.6768	106.859	Nontarget	17.4776
Plcl1	167.217	1.96066	0.332594	5.89506	3.74551e-09	2.00643e-08	141.946	324.914	125.164	108.632	136.039	348.111	134.697	107.944	131.77	369.003	102.955	38.7435	154.713	116.411	Nontarget	13.8213
Iqsec2	91.4587	0.655307	0.31719	2.06597	0.038831	0.0711916	59.3382	122.072	69.2397	91.251	71.6377	122.755	83.2673	142.17	62.8011	166.647	67.6559	118.652	52.1925	50.7431	Nontarget	5.14683
9930111J21Rik1	39.2406	-2.6225	0.837316	-3.13204	0.00173598	0.00433104	36.6501	18.3567	37.2829	115.15	36.9043	6.41257	18.3678	71.0851	44.8579	0	30.0039	96.8588	26.0962	11.3426	Nontarget	3.28329
Lin54	219.259	-1.47995	0.263346	-5.6198	1.91184e-08	9.45959e-08	156.49	174.389	167.773	312.86	170.049	192.377	197.147	226.419	160.367	155.735	224.735	324.477	334.591	272.222	Nontarget	47.6272
Tssc4	33.6608	-1.43573	0.494987	-2.90054	0.00372516	0.00872972	19.1977	44.0561	6.65766	34.7623	19.5376	51.3006	15.3065	42.1245	20.7468	39.6777	22.3558	21.7932	76.4247	57.3098	Nontarget	41.0146
Fancf	30.8221	-3.20245	0.523865	-6.11313	9.76986e-10	5.518e-09	15.1254	22.9459	18.6415	32.5896	18.814	13.7412	15.3065	89.5146	17.3825	18.8469	18.826	38.7435	53.1245	57.9068	Nontarget	25.2523
Ncaph2	256.776	1.14892	2.08328	0.551497	0.581293	0.676653	295.528	234.048	316.905	0	110.713	126.419	356.335	323.832	403.161	409.673	358.282	0	304.767	355.202	Nontarget	60.5435
Uspl1	370.872	1.13593	0.29471	3.85438	0.000116022	0.000357519	383.953	412.108	431.417	254.199	376.279	486.439	402.867	326.465	411.011	468.197	404.17	128.338	386.784	319.98	Nontarget	67.2122
Phlpp2	254.946	0.05628	0.261951	0.21485	0.829884	0.87892	153.581	374.477	157.121	156.43	163.537	482.775	137.146	289.606	173.264	501.923	145.901	227.618	310.359	295.504	Nontarget	23.834
Zcchc2	287.042	0.905613	0.256697	3.52794	0.000418803	0.00117847	253.642	359.792	256.986	256.372	237.345	440.635	287.15	142.17	255.13	507.875	230.618	237.304	286.127	267.446	Nontarget	30.3851
Bdh1	129.786	3.32422	0.365493	9.09517	9.44386e-20	1.32825e-18	214.665	144.1	161.115	65.1793	193.928	125.503	154.902	34.2262	217.561	163.671	170.61	87.1729	35.4163	48.9522	Nontarget	9.56776
Gm15085	168.131	1.1593	2.84907	0.406906	0.684077	0.762567	2.32699	635.142	115.843	117.323	211.295	513.922	10.4084	36.859	0.560724	249.97	0	0	378.396	81.7859	Nontarget	86.7121
Gm15091	44.6056	-0.252741	1.9382	-0.1304	0.89625	0.927503	8.14446	91.7836	26.6307	21.7264	17.3667	73.2866	0	63.1868	0	157.719	36.4753	16.9503	65.2406	45.9673	Nontarget	20.2953
Sirt2	78.2169	0.219322	0.328004	0.668656	0.503715	0.606778	81.4446	56.9058	86.5496	73.8698	98.4114	49.4684	103.472	131.639	88.5944	49.5972	88.2468	106.545	45.6684	34.6247	Nontarget	14.6037
Lrrc8d	227.349	-2.21812	0.325171	-6.82139	9.01629e-12	6.25801e-11	223.391	111.976	245.002	512.744	170.049	82.4474	162.861	487.065	149.713	122.009	159.432	355.956	219.954	180.287	Nontarget	34.6994
Ap3m2	107.671	1.29573	0.387987	3.33961	0.000838963	0.00223121	74.4636	179.896	93.2073	45.6255	92.6225	187.797	56.3279	65.8196	96.4446	217.236	86.4818	31.4791	167.762	112.232	Nontarget	27.8818
Ubl7	101.371	0.556328	0.270392	2.05749	0.0396395	0.072505	51.1937	207.431	69.2397	69.5246	48.4821	231.769	57.5524	71.0851	54.3903	205.332	54.713	67.8011	105.317	125.365	Nontarget	58.8436
Lepr	54.3899	-5.39904	0.666405	-8.10174	5.41798e-16	5.65262e-15	37.2318	10.0962	15.9784	223.782	18.0903	6.41257	25.7149	110.577	41.4936	2.97583	19.4143	159.817	54.0565	35.8187	Nontarget	5.75615
Nfia	1251.25	-0.24398	0.221601	-1.10099	0.270901	0.370943	1461.35	131.251	1812.22	2339.94	1708.45	188.713	1885.76	1914.03	1627.78	197.397	1903.19	2007.4	183.606	156.408	Nontarget	12.9823
Pla2g5	88.4581	-0.507828	0.318215	-1.59587	0.110519	0.175822	116.931	53.2345	101.196	95.5963	105.648	51.3006	112.656	152.701	84.1086	45.6294	90.0117	106.545	57.7845	65.0706	Nontarget	21.4108
Gmeb1	293.097	-1.32517	0.271537	-4.88024	1.05956e-06	4.28753e-06	300.182	179.896	248.997	278.098	256.159	181.384	256.537	502.862	304.473	183.51	320.63	474.608	333.659	282.37	Nontarget	31.4678
Eif4a2	345.864	-2.25727	0.417406	-5.40786	6.37826e-08	2.97844e-07	447.364	102.798	402.123	719.145	472.52	39.3915	438.99	318.567	400.918	54.5569	414.171	510.93	237.662	282.967	Nontarget	67.4313
Gm3435	105.855	-0.480398	0.288541	-1.66492	0.0959281	0.155957	98.897	115.647	73.2343	106.459	94.0698	85.1956	94.9002	131.639	117.752	114.074	97.6598	99.2802	123.025	130.141	Nontarget	47.086
Il1r1	70.8939	-1.79682	0.417667	-4.30203	1.69242e-05	5.89565e-05	85.5168	26.6172	94.5388	110.805	51.3766	20.1538	62.4504	123.741	95.8838	15.8711	87.0701	121.073	48.4645	48.9522	Nontarget	6.59699
Fam178b	112.667	-0.486445	0.510917	-0.952101	0.341046	0.44653	33.7413	228.541	35.9514	26.0717	28.9445	276.657	33.6743	39.4917	18.5039	263.857	48.8299	94.4373	213.43	235.209	Nontarget	88.015
Gm1140	10.0754	2.88362	2.19241	1.31528	0.188417	0.275715	0	30.2886	0	0	7.95975	21.0699	3.67356	0	0	16.863	10.0013	0	34.4843	16.7154	Nontarget	35.2915
Mroh7	7.76863	-2.0478	1.00811	-2.03132	0.0422224	0.0767169	3.49048	11.014	3.9946	19.5538	3.61807	10.0769	1.22452	0	3.92507	13.8872	1.17662	9.68588	13.9801	13.1335	Nontarget	1.79841
Zfp984	179.669	1.01949	0.372625	2.73597	0.00621972	0.0139316	175.688	183.567	190.409	149.912	185.245	211.615	244.291	44.7573	222.608	169.622	242.384	92.0158	190.13	213.121	Nontarget	61.4923
Snx16	51.8678	0.346351	0.402613	0.860258	0.389647	0.49732	51.7755	51.3988	69.2397	32.5896	54.9946	35.7272	66.124	26.3278	55.5117	51.5811	61.1844	62.9582	57.7845	48.9522	Nontarget	15.9387
Trp63	18.5506	-0.248611	0.860372	-0.288958	0.772614	0.834415	23.8516	2.75351	15.9784	15.2085	27.4973	6.41257	17.1433	18.4295	31.9613	7.93555	32.3571	48.4294	2.79603	8.95466	Nontarget	1.17118
Ndufaf2	48.1276	0.900727	0.447129	2.01447	0.0439604	0.079502	39.5588	67.9199	53.2613	47.7981	39.0751	72.3705	52.6543	21.0623	41.4936	53.565	58.2429	24.2147	42.8724	59.6978	Nontarget	73.2398
Eif2b4	205.014	2.03333	0.292663	6.94768	3.71349e-12	2.6752e-11	233.281	261.583	209.051	95.5963	204.059	325.209	194.698	81.6163	228.215	388.842	194.143	133.181	133.277	187.451	Nontarget	55.861
Meioc	69.5358	-0.773192	0.352815	-2.19149	0.0284161	0.0541956	54.6842	80.7696	54.5928	78.2151	39.7987	77.867	51.4298	65.8196	49.3437	94.2346	50.5948	29.0576	112.773	134.32	Nontarget	20.9184
Anks1b	68.0985	-2.93908	0.335893	-8.75006	2.13239e-18	2.68392e-17	31.9961	62.4128	23.9676	191.193	27.4973	57.7132	23.8781	118.475	33.0827	58.5247	25.2974	123.495	92.2689	83.5769	Nontarget	8.22269
Atp13a3	247.782	-2.9472	0.32679	-9.01861	1.90485e-19	2.61241e-18	215.246	111.058	255.654	434.528	180.903	119.091	151.228	329.098	176.628	101.178	178.258	217.932	494.897	503.252	Nontarget	48.8231
Cyld	261.894	-0.370168	0.250852	-1.47564	0.14004	0.215927	321.124	172.553	234.35	315.033	274.25	195.125	266.333	265.911	282.605	202.357	284.743	457.658	202.246	192.227	Nontarget	16.5678
Gpank1	107.607	1.16736	0.339177	3.44175	0.000577966	0.00158373	104.714	129.415	83.8866	54.3161	117.225	132.832	108.37	105.311	106.538	194.421	111.191	58.1153	103.453	96.7104	Nontarget	45.1458
Lpin1	196.868	0.838545	0.240592	3.48533	0.000491525	0.0013652	126.821	373.559	165.11	115.15	119.396	371.929	113.268	81.6163	142.985	361.067	128.252	87.1729	304.767	265.058	Nontarget	32.6134
Hras	163.085	0.408175	0.344998	1.18313	0.236759	0.332853	146.6	210.184	146.469	99.9415	178.733	146.573	204.495	168.498	187.843	183.51	125.899	188.875	146.325	149.244	Nontarget	43.1853
Sema6b	11.391	-2.98447	0.767124	-3.89047	0.000100049	0.000311143	5.81747	17.4389	5.32613	15.2085	2.89445	14.6573	3.0613	15.7967	2.80362	8.92749	1.76494	9.68588	29.8243	26.267	Nontarget	4.61843
Tcn2	47.2722	-3.78044	0.410067	-9.21908	2.99669e-20	4.39036e-19	37.8136	19.2746	31.9568	115.15	20.2612	16.4895	23.8781	110.577	25.2326	18.8469	25.8857	84.7514	62.4446	69.2494	Nontarget	20.784
Hexim2	40.8611	0.815955	0.443581	1.83947	0.0658458	0.112939	23.2699	81.6874	30.6252	34.7623	22.432	65.0418	31.8375	31.5934	42.615	71.4199	27.6507	38.7435	36.3483	34.0277	Nontarget	11.8342
Zkscan17	121.118	0.0632477	0.235679	0.268363	0.78842	0.846121	129.73	98.2084	110.517	141.222	135.316	97.1047	128.574	184.295	126.724	100.186	131.194	167.081	64.3086	81.1889	Nontarget	10.7374
Kars	580.148	1.79476	0.149194	12.0297	2.48079e-33	8.43571e-32	499.139	968.317	492.667	225.955	516.66	1046.17	486.134	226.419	556.238	1055.43	537.129	300.262	593.69	617.872	Nontarget	184.413
Gm10220	61.8529	-3.44517	0.752076	-4.58089	4.63009e-06	1.73233e-05	38.3953	22.9459	22.6361	56.4887	21.7084	22.902	20.2046	218.521	68.4084	22.8147	60.0078	154.974	79.2207	56.7129	Nontarget	16.6926
Nol4l	159.378	0.613134	0.250757	2.44513	0.01448	0.0296682	182.087	76.1804	185.083	208.574	204.059	76.0348	194.698	229.052	199.618	85.3072	203.556	305.105	41.9404	39.9975	Nontarget	3.96085
Iqsec1	519.974	0.234431	0.258691	0.906221	0.364819	0.471827	463.071	398.341	551.254	819.086	445.746	345.363	514.91	1234.78	423.347	466.214	503.595	760.341	179.878	173.72	Nontarget	16.8038
Apobec1	18.7577	-0.677649	0.822394	-0.823996	0.409942	0.517666	26.7604	15.6032	17.3099	10.8632	17.3667	3.66433	17.7555	44.7573	24.6719	4.95972	18.826	43.5864	9.32009	7.16373	Nontarget	2.51801
Nxpe3	22.3135	-1.18254	0.556993	-2.12307	0.0337476	0.0630468	22.6881	15.6032	27.9622	39.1076	15.9195	21.0699	20.8168	18.4295	15.7003	13.8872	20.0026	29.0576	20.5042	31.6398	Nontarget	2.74603
Prickle2	159.143	1.727	0.420198	4.10997	3.95705e-05	0.000130998	180.342	26.6172	234.35	162.948	260.501	43.9719	273.68	242.216	275.876	33.7261	270.035	196.139	18.6402	8.95466	Nontarget	1.17354
Plcxd2	12.3923	-2.23228	0.905504	-2.46523	0.0136924	0.0282181	14.5437	3.67134	9.32073	2.17264	13.025	2.74825	10.4084	10.5311	8.97159	11.9033	10.5896	26.6362	23.3002	25.67	Nontarget	2.16691
Tomm5	20.2558	-0.945362	1.4441	-0.654639	0.5127	0.615181	0	16.521	21.3045	58.6613	20.9848	18.3216	20.8168	0	17.3825	13.8872	20.0026	46.0079	11.1841	18.5063	Nontarget	25.8037
Prr23a1	6.2643	3.1679	1.52262	2.08056	0.0374746	0.0690727	2.32699	16.521	3.9946	0	3.61807	18.3216	0	0	4.48579	13.8872	2.35325	0	10.2521	11.9396	Nontarget	7.85912
Ost4	111.036	-1.8397	0.387715	-4.74497	2.08537e-06	8.13378e-06	55.8477	118.401	61.2505	165.121	79.5975	98.9368	102.247	129.006	58.876	90.2669	62.9494	244.568	151.917	135.514	Nontarget	324.751
Ctxn3	9.14754	1.69463	1.26602	1.33855	0.180716	0.266249	8.72621	18.3567	0	2.17264	12.3014	10.993	4.28582	0	7.28942	17.855	10.5896	4.84294	20.5042	10.1486	Nontarget	8.07654
2810006K23Rik	100.725	0.448952	0.315816	1.42156	0.155153	0.234804	109.95	78.016	98.5334	80.3878	157.748	74.2026	139.595	57.9212	135.695	70.428	134.723	82.33	88.5408	102.083	Nontarget	44.0818
CK137956	10.1672	-2.9478	0.970552	-3.03723	0.0023876	0.00580341	3.49048	9.17836	3.9946	15.2085	4.34168	2.74825	1.22452	47.3901	5.60724	7.93555	2.35325	26.6362	7.45607	4.77582	Nontarget	1.5646
Ccdc62	26.3368	-2.70964	0.891566	-3.03919	0.00237214	0.00577265	13.3802	16.521	14.6469	80.3878	22.432	17.4056	20.8168	0	15.1396	15.8711	18.826	36.322	52.1925	44.7733	Nontarget	8.68422
Lpgat1	207.134	0.321491	0.180886	1.77731	0.0755171	0.12723	223.973	193.663	233.018	169.466	251.817	193.293	228.373	142.17	226.533	184.502	241.796	142.867	230.206	238.194	Nontarget	22.5592
Nkapd1	294.472	0.898136	0.257501	3.48789	0.000486856	0.00135383	411.295	104.633	395.465	169.466	462.389	119.091	579.81	226.419	509.698	126.969	505.948	217.932	138.869	154.617	Nontarget	29.7677
Ppp2r5c	411.664	1.09492	0.189111	5.78983	7.04576e-09	3.66158e-08	486.922	262.501	591.2	356.313	609.283	247.342	652.668	394.917	531.006	275.76	590.077	394.699	187.334	183.272	Nontarget	50.9368
Dnaja3	312.948	1.65684	0.50662	3.27038	0.00107405	0.00279611	129.73	358.874	174.431	104.287	290.893	767.677	312.864	218.521	281.484	743.958	251.209	193.718	264.69	288.937	Nontarget	71.2729
Ccdc36	40.2618	0.0486087	0.726097	0.0669452	0.946625	0.962958	20.9429	60.5772	19.973	60.834	36.9043	69.6222	26.9394	0	25.7933	72.4119	26.474	21.7932	58.7166	62.6826	Nontarget	14.7345
Sos2	325.944	1.04225	0.184993	5.634	1.76072e-08	8.73806e-08	483.432	136.758	535.276	380.212	492.781	137.412	453.072	286.973	487.269	155.735	487.71	322.055	100.657	103.874	Nontarget	13.0864
1190007I07Rik	7.94821	0.286913	1.16109	0.247107	0.804826	0.858992	4.07223	11.9319	3.9946	2.17264	3.61807	9.16082	9.79615	0	10.093	6.94361	4.70649	4.84294	21.4362	18.5063	Nontarget	34.304
Sh3kbp1	163.004	0.888682	0.301035	2.95208	0.00315636	0.00750209	151.254	169.8	159.784	167.293	209.848	163.979	199.597	229.052	137.938	164.663	205.321	147.71	83.8808	91.9345	Nontarget	11.5794
Crmp1	5.92907	0.656682	1.27196	0.516275	0.605662	0.697746	3.49048	12.8497	5.32613	0	1.44723	15.5734	1.83678	0	2.80362	13.8872	0.588312	7.26441	8.38808	9.55164	Nontarget	1.78628
Ldha	230.948	1.59136	0.272275	5.8447	5.07493e-09	2.67608e-08	250.151	243.226	276.959	162.948	305.365	292.23	281.639	118.475	233.822	284.688	273.565	220.354	122.093	167.751	Nontarget	59.6983
Eif2d	104.593	0.766174	0.286864	2.67086	0.00756565	0.0165888	76.7906	156.032	91.8757	41.2802	77.4266	167.643	97.9615	44.7573	88.0337	145.816	94.7182	70.2226	163.102	148.647	Nontarget	53.2384
P4ha2	26.4373	-1.51301	0.628465	-2.40747	0.0160634	0.0325883	27.9239	28.4529	26.6307	43.4528	20.9848	14.6573	15.9187	21.0623	12.8967	16.863	20.5909	67.8011	24.2322	28.6549	Nontarget	8.04033
Dpysl3	221.892	1.28477	0.273747	4.69326	2.6889e-06	1.03582e-05	321.706	65.1663	291.606	182.502	379.173	87.9439	366.131	242.216	365.031	93.2427	380.638	222.775	45.6684	62.6826	Nontarget	6.07791
Tcirg1	15.4106	-3.10897	0.797457	-3.8986	9.67496e-05	0.00030179	9.8897	7.34269	5.32613	34.7623	8.68336	11.9091	9.18389	44.7573	16.261	5.95166	4.70649	14.5288	16.7762	25.67	Nontarget	4.5302
Utp14b	162.503	0.202363	0.282219	0.717042	0.473348	0.578698	214.083	108.305	161.115	95.5963	209.124	131.916	178.167	171.131	197.936	120.025	238.266	130.759	155.645	162.975	Nontarget	27.852
Kctd14	860.893	2.34783	0.225059	10.432	1.77057e-25	3.67132e-24	1596.9	86.2766	1744.31	686.555	1605.7	62.2936	1676.98	658.196	1464.61	69.4361	1581.38	753.077	36.3483	30.4459	Nontarget	9.36556
Inafm1	28.8491	-0.217397	0.492534	-0.441384	0.658935	0.741947	16.2889	48.6453	17.3099	19.5538	14.4723	45.8041	22.6536	44.7573	17.9432	37.6939	25.2974	31.4791	27.9603	34.0277	Nontarget	12.5663
Zfp935	97.5192	-2.36717	0.362279	-6.53409	6.39957e-11	4.07707e-10	100.642	20.1924	111.849	169.466	124.462	26.5664	137.758	131.639	103.734	9.91944	136.488	130.759	76.4247	85.3678	Nontarget	27.7471
Nr4a2	20.8804	-0.0499789	0.707828	-0.0706088	0.943709	0.960624	16.2889	12.8497	35.9514	26.0717	21.7084	9.16082	28.1639	21.0623	14.5788	11.9033	38.8286	33.9006	9.32009	12.5365	Nontarget	2.38702
Rbl1	115.3	-0.0144798	0.402613	-0.0359646	0.971311	0.981167	123.912	74.3447	143.806	141.222	169.326	101.685	133.473	76.3507	90.8373	76.3797	168.845	75.0655	118.365	120.589	Nontarget	26.2734
Zbp1	7.90947	-0.556794	1.20641	-0.461529	0.644419	0.730831	1.16349	11.014	3.9946	8.69057	6.51252	12.8251	4.28582	28.9606	6.72869	12.8953	1.76494	0	6.52406	5.3728	Nontarget	5.31034
Bean1	16.2838	-2.74341	0.740157	-3.70653	0.000210117	0.000624644	4.65398	21.1102	6.65766	21.7264	6.51252	10.993	12.2452	39.4917	12.3359	5.95166	8.82468	26.6362	25.1642	25.67	Nontarget	5.03312
Nmi	107.915	2.51621	0.335216	7.50624	6.08513e-14	5.21862e-13	126.821	131.251	125.164	69.5246	149.788	117.258	131.636	36.859	148.031	132.92	147.666	106.545	50.3285	37.0126	Nontarget	32.211
Naa20	39.5478	-1.81448	0.478372	-3.79303	0.000148821	0.000451434	24.4334	21.1102	35.9514	28.2443	34.7334	29.3146	45.3072	57.9212	42.0543	17.855	35.887	50.8509	72.6967	57.3098	Nontarget	49.4624
Tpx2	806.222	2.99845	0.15441	19.4188	5.35252e-84	2.10609e-81	1004.68	829.724	1051.91	421.493	1137.52	908.753	1102.68	452.839	1234.15	949.29	1149.56	498.823	267.487	278.192	Nontarget	39.159
Rbm43	55.1998	0.947375	0.388045	2.44141	0.0146301	0.0299266	47.1215	82.6052	37.2829	52.1434	63.678	66.874	55.7156	55.2884	48.2223	84.3152	56.4779	31.4791	52.1925	39.4005	Nontarget	15.7064
Myo9b	635.745	0.735747	0.213997	3.43811	0.000585784	0.00160196	670.754	665.431	579.217	373.694	642.569	853.788	599.402	584.478	610.629	932.427	629.494	481.872	625.378	651.302	Nontarget	49.0295
Lmo2	25.6675	0.981649	0.682473	1.43837	0.150329	0.228845	13.3802	40.3848	21.3045	36.9349	35.4571	27.4825	30.0007	31.5934	28.0362	25.7905	25.8857	12.1073	21.4362	9.55164	Nontarget	7.70402
Alg12	31.8895	-6.11026	0.533232	-11.4589	2.12134e-30	6.1182e-29	9.8897	8.26052	11.9838	84.733	10.8542	4.58041	11.6329	71.0851	6.16797	9.91944	6.47143	96.8588	53.1245	60.8917	Nontarget	17.6069
Gm14124	24.8592	-1.64725	0.649101	-2.53774	0.011157	0.0234611	11.6349	19.2746	10.6523	13.0359	5.78891	24.7342	10.4084	7.89835	13.4574	23.8066	12.3545	2.42147	92.2689	100.292	Nontarget	25.68
Zfp937	214.278	-2.7651	0.335778	-8.23492	1.79672e-16	1.93185e-15	242.589	75.2625	219.703	408.457	196.823	32.0629	191.637	415.98	214.757	32.7341	257.092	355.956	178.946	177.899	Nontarget	18.1882
Sap18b	90.9685	-0.289629	2.41614	-0.119873	0.904584	0.933287	15.7072	68.8377	91.8757	8.69057	49.9293	0	181.841	7.89835	43.1758	162.679	0	43.5864	303.835	295.504	Nontarget	370.943
Chid1	53.4515	-2.62978	0.602709	-4.36327	1.28134e-05	4.54486e-05	46.5398	44.974	53.2613	84.733	34.7334	26.5664	31.8375	65.8196	39.8114	15.8711	32.9455	19.3718	127.685	124.171	Nontarget	18.5214
Dmrtc1c2	4.75965	2.07675	1.46367	1.41886	0.15594	0.235736	2.32699	10.0962	3.9946	2.17264	2.17084	12.8251	1.83678	0	2.80362	10.9114	2.35325	0	5.59205	9.55164	Nontarget	3.3883
Dmrtc1c1	4.75965	2.07675	1.46367	1.41886	0.15594	0.235736	2.32699	10.0962	3.9946	2.17264	2.17084	12.8251	1.83678	0	2.80362	10.9114	2.35325	0	5.59205	9.55164	Nontarget	3.3883
Atat1	41.576	-0.733381	0.535001	-1.3708	0.170437	0.253528	34.3231	44.974	29.2937	54.3161	46.3113	54.0488	41.0214	68.4524	30.8398	27.7744	27.0623	19.3718	55.9205	48.3552	Nontarget	22.5637
Slc6a8	64.8197	-1.73701	0.534314	-3.25092	0.00115032	0.00297731	44.7945	8.26052	50.5982	182.502	79.5975	11.9091	66.7363	173.764	40.9329	7.93555	65.8909	152.553	13.0481	8.95466	Nontarget	1.70235
Gon7	82.3854	-3.93205	0.42605	-9.22907	2.72982e-20	4.01718e-19	36.0683	18.3567	38.6144	173.811	60.7835	16.4895	63.675	207.99	49.9045	17.855	51.7714	297.841	67.1046	53.131	Nontarget	47.5919
Gm20604	107.443	2.93347	1.67157	1.75492	0.0792733	0.132545	75.6271	125.744	115.843	119.495	162.813	141.077	171.433	0	157.564	139.864	168.845	0	74.5607	51.3401	Nontarget	11.3686
Zfp949	80.7592	0.675365	0.327211	2.064	0.0390177	0.0714862	76.7906	91.7836	77.2289	89.0783	86.11	77.867	89.3899	42.1245	93.6409	112.09	77.0688	79.9085	67.1046	70.4433	Nontarget	14.6261
Nars	362.519	2.10243	0.262303	8.01528	1.09886e-15	1.10674e-14	392.679	460.754	391.471	219.437	431.997	589.041	432.867	152.701	411.011	592.19	282.39	191.296	266.554	260.879	Nontarget	71.9905
Tent5c	127.022	0.198948	0.292665	0.67978	0.496644	0.600369	134.965	81.6874	189.078	210.746	144.723	70.5383	137.758	165.865	123.92	78.3635	168.257	162.238	54.0565	56.1159	Nontarget	18.1386
Zfp955b	114.485	0.092402	0.338105	0.273293	0.784628	0.843312	95.4065	131.251	101.196	67.3519	75.9794	163.979	127.35	102.679	104.855	111.098	122.957	96.8588	153.781	148.05	Nontarget	38.392
Gm10778	82.5474	-1.22636	0.331014	-3.70486	0.000211509	0.000628329	90.1708	57.8237	69.2397	149.912	83.9392	49.4684	82.0427	68.4524	71.7727	57.5327	83.5403	99.2802	90.4048	102.083	Nontarget	15.9866
Frrs1l	13.4517	-1.57944	0.913422	-1.72915	0.0837825	0.138828	12.7984	13.7675	10.6523	6.51793	12.3014	15.5734	3.0613	26.3278	10.093	10.9114	4.11818	4.84294	31.6883	25.67	Nontarget	5.46797
Mpped2	58.4369	-0.210811	0.463598	-0.454728	0.649305	0.734444	17.4524	99.1263	23.9676	21.7264	34.0098	109.014	17.1433	15.7967	24.1111	110.106	33.5338	26.6362	148.189	137.305	Nontarget	35.5676
H2-Q4	28.3703	-2.32656	0.725717	-3.20588	0.00134651	0.003434	19.7794	19.2746	15.9784	93.4236	20.9848	7.32866	18.3678	23.695	19.6253	15.8711	9.41299	99.2802	18.6402	15.5214	Nontarget	7.46706
Syce1	142.776	1.43036	0.312723	4.5739	4.7873e-06	1.78791e-05	79.1176	332.257	74.5658	71.6972	109.989	337.118	89.3899	60.554	60.5582	327.341	78.2455	55.6938	174.286	148.05	Nontarget	76.84
Fam13c	108.486	1.95459	0.350688	5.57357	2.49566e-08	1.2177e-07	75.6271	184.485	74.5658	41.2802	80.3211	187.797	107.758	50.0229	109.902	255.921	90.6	46.0079	111.841	102.68	Nontarget	21.8316
Fam196a	22.8871	-1.07326	0.513471	-2.09021	0.0365989	0.0676775	18.6159	22.9459	9.32073	19.5538	19.5376	26.5664	14.082	28.9606	22.429	22.8147	17.6494	26.6362	37.2803	34.0277	Nontarget	5.02898
Ppfia4	110.377	-0.848018	0.300375	-2.8232	0.00475468	0.0108876	77.9541	149.607	62.582	78.2151	81.7683	129.168	56.3279	129.006	67.8476	156.727	83.5403	94.4373	203.178	174.914	Nontarget	17.5282
Vwa5b2	13.0275	-1.78673	0.914576	-1.95362	0.0507467	0.0901183	1.16349	17.4389	7.9892	6.51793	2.89445	24.7342	4.89807	2.63278	2.2429	31.7422	2.35325	19.3718	27.9603	30.4459	Nontarget	3.95556
Spg20	243.353	2.81745	0.270407	10.4193	2.0247e-25	4.18253e-24	385.698	147.772	342.204	128.186	426.208	124.587	383.887	226.419	450.262	136.888	401.817	162.238	46.6004	44.1763	Nontarget	7.28965
Btbd18	219.811	1.74804	0.242842	7.19824	6.09943e-13	4.75468e-12	99.4788	491.042	103.86	76.0425	115.055	576.216	110.207	36.859	112.145	563.424	119.427	58.1153	312.223	303.265	Nontarget	54.9031
Ube2ql1	8.4525	-2.39313	1.1635	-2.05683	0.0397022	0.0726035	1.74524	15.6032	0	23.8991	0.723613	10.993	0.612259	13.1639	2.2429	18.8469	5.29481	2.42147	10.2521	12.5365	Nontarget	2.85128
1500009L16Rik	53.4821	-2.0631	0.619269	-3.3315	0.000863788	0.00229132	33.1596	16.521	30.6252	71.6972	38.3515	33.895	63.0627	84.2491	44.8579	16.863	45.3	203.403	27.9603	38.8035	Nontarget	24.0673
Kcnt1	67.7571	-4.20896	0.428863	-9.81422	9.77949e-23	1.69943e-21	46.5398	21.1102	39.946	208.574	41.246	21.0699	28.7762	176.396	30.2791	20.8308	37.0636	96.8588	96.9289	82.9799	Nontarget	8.86351
Smim20	43.8233	-0.119094	0.553138	-0.215305	0.829529	0.878703	32.5778	48.6453	45.2721	84.733	36.9043	39.3915	70.4098	52.6557	36.4471	20.8308	38.8286	53.2723	26.0962	27.461	Nontarget	26.3441
Lrrc74b	11.2063	-4.56934	1.25266	-3.64771	0.000264593	0.000774471	2.90874	7.34269	2.66307	30.417	5.06529	7.32866	0	42.1245	3.92507	2.97583	7.64805	2.42147	22.3682	19.7003	Nontarget	6.36144
Arhgef33	27.4334	2.07107	0.669215	3.09477	0.00196964	0.00486552	26.7604	55.988	15.9784	10.8632	23.8792	49.4684	15.9187	5.26557	25.7933	53.565	15.2961	2.42147	42.8724	39.9975	Nontarget	8.46338
Rfx8	17.2766	1.3656	0.85429	1.59852	0.109928	0.175169	5.81747	33.9599	5.32613	8.69057	12.3014	35.7272	10.4084	0	11.7752	38.6858	17.061	7.26441	36.3483	18.5063	Nontarget	9.82853
Use1	229.649	0.270061	0.243283	1.11007	0.266969	0.366379	239.68	127.579	247.665	267.235	337.204	152.07	320.212	276.442	319.052	151.767	268.858	244.568	131.413	131.335	Nontarget	91.4403
Ctla2a	272.131	-2.59289	1.1014	-2.35417	0.0185641	0.0371237	452.599	99.1263	367.503	514.916	232.28	8.24474	151.84	260.646	482.223	9.91944	390.051	435.864	202.246	202.375	Nontarget	138.696
Igsf9	29.0904	-2.55073	0.633312	-4.02761	5.6347e-05	0.000182116	14.5437	40.3848	9.32073	36.9349	13.7487	31.1468	12.2452	2.63278	9.53231	24.7986	8.82468	36.322	75.4927	91.3376	Nontarget	11.7116
Mak	14.9936	2.47732	1.20729	2.05196	0.0401732	0.0733836	9.8897	42.2204	5.32613	2.17264	5.78891	41.2237	2.44904	2.63278	9.53231	26.7825	6.47143	0	27.9603	27.461	Nontarget	5.42593
Gpd2	43.8154	1.12106	0.516468	2.17063	0.0299589	0.0567321	55.266	21.1102	46.6036	39.1076	81.7683	38.4754	50.2053	44.7573	43.1758	29.7583	69.4208	60.5367	17.7082	15.5214	Nontarget	1.96782
Kifc3	63.7359	0.274439	0.364133	0.753677	0.451043	0.557805	34.3231	95.4549	30.6252	65.1793	44.1404	109.014	58.7769	84.2491	39.2507	115.065	42.3584	75.0655	45.6684	53.131	Nontarget	8.59992
Pak6	165.07	2.48599	0.452276	5.49662	3.8715e-08	1.85075e-07	266.44	28.4529	308.916	210.746	261.948	23.8181	206.944	173.764	275.316	29.7583	274.742	237.304	7.45607	5.3728	Nontarget	1.03267
Sh3bp2	42.5178	-0.504696	0.603782	-0.835891	0.403216	0.510969	34.9048	27.5351	21.3045	36.9349	34.7334	51.3006	42.2459	115.842	26.354	46.6214	41.1818	58.1153	37.2803	20.8942	Nontarget	6.10645
Gm14139	17.2792	-1.84294	0.943022	-1.95429	0.0506664	0.0900144	5.23572	8.26052	7.9892	4.34528	8.68336	23.8181	11.0207	0	8.97159	5.95166	12.3545	14.5288	76.4247	54.325	Nontarget	31.9845
Itgb5	149.225	-2.35205	0.556964	-4.22299	2.41079e-05	8.23837e-05	144.855	139.511	95.8703	354.141	74.5322	70.5383	96.737	265.911	84.1086	127.961	78.8338	92.0158	243.254	220.882	Nontarget	42.3653
Tiam1	1255.32	1.63877	0.294283	5.56869	2.56664e-08	1.24901e-07	1766.77	1009.62	1629.8	856.021	1586.16	1140.52	1394.73	1885.07	1586.29	1185.37	1485.49	1188.94	437.112	422.66	Nontarget	35.4463
Zfat	64.5709	0.555103	0.439775	1.26224	0.206862	0.297761	42.4675	81.6874	45.2721	32.5896	41.9696	139.244	45.9194	13.1639	42.0543	130.937	38.2403	60.5367	93.2009	96.7104	Nontarget	12.9242
Yeats2	345.915	-0.726821	0.152314	-4.77186	1.8253e-06	7.17186e-06	301.345	322.16	300.926	428.011	296.682	369.181	282.864	397.55	282.605	369.003	277.683	346.27	454.82	413.705	Nontarget	57.4558
Zfp691	58.7193	0.702963	0.444802	1.5804	0.114016	0.180534	45.958	44.974	67.9082	78.2151	82.4919	34.8111	61.8382	76.3507	92.5195	41.6616	61.1844	92.0158	24.2322	17.9093	Nontarget	8.18902
Tenm3	311.978	-1.79636	0.432674	-4.15177	3.29912e-05	0.000110367	418.858	138.593	406.117	806.05	256.883	97.1047	213.678	550.252	291.016	127.961	250.621	360.799	249.778	199.987	Nontarget	13.011
Pigv	59.8504	-4.50599	0.486666	-9.2589	2.06558e-20	3.0615e-19	52.3572	21.1102	31.9568	132.531	35.4571	8.24474	33.062	71.0851	45.4187	10.9114	41.1818	140.445	117.433	96.7104	Nontarget	36.1082
Crocc	293.56	1.9764	0.489324	4.03905	5.36692e-05	0.000174239	315.889	310.229	292.937	82.5604	281.486	405.824	292.048	310.668	342.042	627.9	315.923	128.338	193.858	210.136	Nontarget	17.33
Dlgap2	11.6656	-0.199238	0.969006	-0.205611	0.837095	0.884742	7.56271	9.17836	11.9838	23.8991	11.5778	25.6503	3.67356	18.4295	8.41086	16.863	3.52987	2.42147	11.1841	8.95466	Nontarget	1.44231
Parp4	224.016	0.611181	0.275328	2.21983	0.0264306	0.0508726	267.022	154.196	243.67	321.551	224.32	177.72	214.291	434.409	274.755	171.606	248.856	239.725	89.4728	74.6222	Nontarget	8.31139
C5ar2	1281.13	-7.46581	0.769498	-9.70218	2.95136e-22	4.97189e-21	18.0342	54.1523	10.6523	5916.1	23.1556	18.3216	29.3884	2714.4	23.5504	23.8066	24.7091	9036.92	28.8923	13.7305	Nontarget	4.33593
Trim12c	204.288	0.1995	0.267202	0.746626	0.45529	0.561879	225.718	201.006	175.762	212.919	220.702	245.51	176.943	165.865	210.272	247.986	177.082	125.916	260.03	214.315	Nontarget	50.5369
Wdfy4	127.76	-0.447149	0.384824	-1.16196	0.245253	0.342319	73.3001	137.675	87.8812	52.1434	91.1753	203.37	77.1447	76.3507	94.2017	218.228	67.6559	135.602	248.846	225.061	Nontarget	14.1649
Fam98c	15.1401	0.926255	0.707731	1.30877	0.190613	0.278348	19.7794	13.7675	13.3153	4.34528	24.6029	14.6573	12.8574	7.89835	20.1861	12.8953	21.7675	19.3718	13.9801	12.5365	Nontarget	8.41496
Zfp444	95.1334	-0.433698	0.300424	-1.44362	0.148846	0.226914	75.0454	95.4549	95.8703	97.7689	102.03	80.6152	85.7163	100.046	89.7159	103.162	85.8935	60.5367	145.393	114.62	Nontarget	18.319
Nrcam	21.7224	-2.9522	0.661529	-4.46269	8.09366e-06	2.94422e-05	27.3421	8.26052	21.3045	28.2443	11.5778	5.49649	14.082	39.4917	24.6719	3.96777	22.9442	48.4294	21.4362	26.864	Nontarget	2.15618
Htatip2	25.4194	-0.158211	0.6012	-0.263159	0.792428	0.849256	23.8516	28.4529	19.973	43.4528	10.8542	46.7202	9.79615	21.0623	18.5039	34.718	18.2377	41.165	22.3682	16.7154	Nontarget	9.47394
Acot7	128.357	2.00674	0.322356	6.22524	4.80833e-10	2.81682e-09	79.6994	304.721	73.2343	26.0717	86.8336	291.314	98.5737	23.695	69.5298	283.696	71.774	55.6938	158.441	173.72	Nontarget	88.7441
Als2cl	46.641	1.21159	2.29793	0.527251	0.598019	0.691468	91.3343	38.5491	0	91.251	72.3613	71.4544	46.5317	0	68.9691	46.6214	45.8883	0	23.3002	56.7129	Nontarget	4.4402
Fancb	19.8999	-0.125202	0.826531	-0.151478	0.879598	0.915414	20.9429	31.2064	13.3153	23.8991	8.68336	34.8111	7.95937	31.5934	16.8217	24.7986	14.7078	0	30.7563	19.1033	Nontarget	6.75214
Fastkd5	93.2227	-0.178123	0.285285	-0.624371	0.532384	0.634086	57.0112	144.1	55.9244	102.114	60.7835	163.063	54.4911	50.0229	65.6047	143.832	64.7143	62.9582	142.597	137.902	Nontarget	30.5759
Fbxo34	220.145	1.60577	0.360922	4.44909	8.62345e-06	3.12139e-05	280.402	281.776	280.953	99.9415	251.094	196.958	219.801	142.17	320.174	295.599	207.674	217.932	132.345	155.214	Nontarget	31.0799
Smim19	32.2998	-0.779767	0.527252	-1.47893	0.13916	0.21475	22.6881	26.6172	34.6198	63.0066	34.0098	25.6503	35.511	23.695	24.1111	19.8389	40.0052	43.5864	24.2322	34.6247	Nontarget	18.1001
Rangap1	303.469	2.13928	1.32048	1.62008	0.105214	0.168649	539.28	214.774	123.833	180.329	365.425	240.93	525.931	0	602.218	241.042	569.486	67.8011	249.778	327.741	Nontarget	58.5584
Dbnl	348.837	2.30189	0.268949	8.55884	1.14008e-17	1.36135e-16	404.314	454.329	356.851	141.222	459.495	435.139	467.154	102.679	449.14	451.334	440.057	239.725	233.934	248.343	Nontarget	65.4303
Cnp	87.9322	1.53799	0.357155	4.30621	1.66075e-05	5.7938e-05	59.92	172.553	69.2397	32.5896	60.7835	188.713	54.4911	15.7967	41.4936	199.381	57.6546	43.5864	120.229	114.62	Nontarget	26.7451
Eng	31.5068	-1.12576	0.621677	-1.81085	0.0701645	0.119355	23.8516	11.9319	38.6144	97.7689	26.0501	4.58041	26.9394	60.554	23.5504	10.9114	38.2403	62.9582	5.59205	9.55164	Nontarget	1.33056
Rnf217	95.3934	0.347029	0.293661	1.18173	0.237312	0.333545	57.593	178.06	66.5766	95.5963	74.5322	134.664	69.1853	52.6557	74.0156	159.703	70.5974	92.0158	103.453	106.859	Nontarget	25.5126
Ephb6	75.3666	-3.1208	0.534818	-5.83526	5.37077e-09	2.82847e-08	52.3572	44.0561	69.2397	215.092	47.7585	27.4825	31.8375	155.334	30.2791	50.5891	40.5935	79.9085	110.909	99.6952	Nontarget	17.5741
Magi3	489.939	2.34599	0.259668	9.03456	1.64669e-19	2.26588e-18	377.554	803.106	360.845	175.984	427.656	1141.44	401.03	281.708	351.574	1212.16	391.227	179.189	393.308	362.365	Nontarget	38.0254
Dip2b	415.937	0.302979	0.171369	1.76799	0.0770625	0.129424	402.569	471.768	411.444	321.551	351.676	540.488	334.294	342.262	387.46	570.368	380.638	392.278	448.296	468.03	Nontarget	32.0283
Upp1	185.402	0.821663	0.75575	1.08722	0.276942	0.377463	26.1786	527.756	31.9568	63.0066	109.266	544.153	35.511	18.4295	19.6253	573.343	23.5325	50.8509	269.351	302.668	Nontarget	188.538
Irf9	112.39	-1.62882	0.31119	-5.23418	1.65723e-07	7.38203e-07	112.859	44.974	115.843	169.466	128.803	31.1468	108.982	250.114	146.349	32.7341	109.426	188.875	65.2406	68.6524	Nontarget	18.5367
Mcf2l	93.3035	1.10912	0.490316	2.26205	0.023694	0.0461645	103.551	46.8096	131.822	47.7981	159.195	54.0488	145.105	139.538	132.331	54.5569	161.197	41.165	50.3285	38.8035	Nontarget	5.11561
Grip2	14.0557	-1.94074	0.789408	-2.45848	0.0139526	0.0286757	7.56271	12.8497	13.3153	13.0359	9.40698	10.993	4.28582	42.1245	7.85014	16.863	8.82468	7.26441	23.3002	19.1033	Nontarget	2.27059
Plxnb2	305.088	-3.09672	0.537283	-5.76367	8.23046e-09	4.25318e-08	385.117	81.6874	352.856	1125.43	180.903	49.4684	174.494	713.484	189.525	47.6133	202.379	435.864	172.422	159.99	Nontarget	14.7788
Wdr35	146.072	1.40376	0.295483	4.75073	2.02685e-06	7.92237e-06	157.653	195.499	141.142	110.805	134.592	262.916	121.227	118.475	116.631	219.22	160.021	67.8011	120.229	118.799	Nontarget	17.7064
Adcy3	70.2276	-3.03947	0.426011	-7.13472	9.69828e-13	7.42008e-12	48.8668	65.1663	45.2721	71.6972	32.5626	30.2307	31.2252	121.108	39.2507	52.573	30.5922	108.966	152.849	152.826	Nontarget	19.5178
H13	186.598	-4.09414	0.2412	-16.9741	1.27801e-64	2.13337e-62	156.49	37.6313	145.137	425.838	149.064	41.2237	127.962	344.895	149.153	36.7019	157.079	295.419	277.739	268.043	Nontarget	60.6954
Atp23	79.359	-0.711086	0.40469	-1.75711	0.0788986	0.132038	33.7413	131.251	35.9514	45.6255	40.5224	141.077	40.4091	34.2262	32.522	126.969	55.3013	94.4373	157.509	141.484	Nontarget	85.4099
Vsir	30.3063	-4.258	0.763976	-5.57347	2.49713e-08	1.21805e-07	17.4524	16.521	6.65766	97.7689	7.95975	9.16082	7.95937	139.538	8.41086	17.855	7.05974	29.0576	32.6203	26.267	Nontarget	3.66832
Mutyh	21.982	0.460274	0.627912	0.733022	0.463545	0.569911	15.1254	44.974	14.6469	13.0359	13.025	43.9719	17.1433	2.63278	10.093	26.7825	12.9429	12.1073	40.0764	41.1914	Nontarget	15.8292
Csnk1g2	379.928	-0.0734437	0.186836	-0.393092	0.694251	0.771255	353.702	229.459	444.732	460.6	466.007	268.412	465.929	505.494	454.187	246.994	464.178	481.872	232.07	245.358	Nontarget	68.6492
Axin1	557.237	1.63282	0.138453	11.7933	4.22683e-32	1.33817e-30	572.439	828.806	527.287	380.212	575.996	759.432	588.993	402.816	610.068	845.136	560.073	375.328	361.619	413.108	Nontarget	61.9206
Nol9	448.469	2.79128	1.37541	2.02942	0.042416	0.0770378	376.39	1008.7	50.5982	106.459	312.601	1213.81	250.414	0	404.282	1199.26	120.604	116.231	552.681	566.532	Nontarget	103.808
Lrrc57	32.3665	0.0179632	0.678234	0.0264853	0.97887	0.986685	40.7223	22.0281	26.6307	13.0359	48.4821	24.7342	40.4091	73.7179	40.9329	21.8228	33.5338	14.5288	23.3002	29.2519	Nontarget	10.2002
Heph	67.1005	-1.6902	0.971214	-1.7403	0.0818069	0.136092	107.623	16.521	73.2343	319.378	39.0751	6.41257	42.2459	23.695	54.951	4.95972	72.9507	154.974	10.2521	13.1335	Nontarget	1.65665
Atp6v1c2	10.695	0.446434	1.07749	0.414328	0.678634	0.758341	2.32699	30.2886	3.9946	4.34528	4.34168	21.0699	0	0	2.80362	35.71	3.52987	4.84294	16.7762	19.7003	Nontarget	8.45689
Proser2	85.9711	0.62271	0.340493	1.82885	0.0674224	0.115284	37.2318	189.074	43.9406	32.5896	49.9293	154.818	46.5317	42.1245	43.1758	184.502	61.1844	43.5864	137.005	137.902	Nontarget	26.5118
Efl1	172.383	1.24704	0.244667	5.09687	3.45311e-07	1.48248e-06	222.809	155.114	194.404	117.323	221.426	180.468	194.086	123.741	229.897	154.743	232.383	162.238	128.617	96.1134	Nontarget	19.8704
Tfap2c	65.561	1.20784	0.403537	2.99313	0.00276135	0.00663575	34.3231	148.689	34.6198	23.8991	28.2209	141.993	28.7762	26.3278	38.1292	186.485	39.4169	60.5367	57.7845	68.6524	Nontarget	15.7965
Efcc1	37.8351	-3.34275	0.580681	-5.7566	8.58251e-09	4.42403e-08	24.4334	5.50702	17.3099	76.0425	30.3918	6.41257	35.511	73.7179	33.6435	8.92749	31.1805	145.288	18.6402	22.6851	Nontarget	4.89605
Ikbkb	125.44	1.09668	0.259879	4.21997	2.44336e-05	8.33586e-05	172.197	73.4269	158.452	108.632	151.959	95.2725	174.494	113.21	172.703	91.2588	184.73	147.71	57.7845	54.325	Nontarget	8.84812
Zfand2a	68.3111	-1.4578	0.365628	-3.98712	6.68809e-05	0.000213621	43.0493	40.3848	58.5874	119.495	70.1905	55.881	64.8995	86.8818	51.5866	41.6616	55.3013	145.288	65.2406	57.9068	Nontarget	12.9172
Ccdc85c	28.635	0.797682	0.542554	1.47024	0.141498	0.217707	24.4334	32.1243	21.3045	6.51793	26.7737	44.888	22.6536	23.695	31.4006	43.6455	30.5922	33.9006	34.4843	24.4761	Nontarget	14.2773
Cenpl	10.0763	3.0941	4.69557	0.658941	0.509934	0.612528	0	29.3707	21.3045	0	0	21.0699	0	0	0	23.8066	0	0	3.72803	41.7884	Nontarget	6.78773
Plekhg1	483.919	2.0598	0.233255	8.83069	1.04035e-18	1.33796e-17	752.781	266.172	643.13	469.291	717.825	326.125	568.789	502.862	823.704	360.076	643.613	484.294	101.589	114.62	Nontarget	9.29181
Pde1c	34.6061	-0.903689	0.813882	-1.11034	0.266851	0.366277	23.8516	34.8778	15.9784	56.4887	15.1959	40.3076	28.1639	0	26.354	63.4844	17.6494	19.3718	78.2887	64.4736	Nontarget	9.41444
Tor1aip1	373.325	-1.08941	0.259985	-4.19026	2.78636e-05	9.42251e-05	537.534	107.387	533.945	680.037	422.59	121.839	391.846	602.907	471.008	113.082	427.114	421.336	201.314	194.615	Nontarget	32.3
Foxg1	16.1292	-0.889521	0.680677	-1.30682	0.191275	0.279125	11.6349	21.1102	7.9892	30.417	5.78891	17.4056	6.12259	21.0623	15.1396	15.8711	11.1779	41.165	8.38808	12.5365	Nontarget	1.68971
Tmem9	53.6661	-3.1396	0.693815	-4.52513	6.03588e-06	2.22505e-05	45.3763	15.6032	54.5928	241.163	23.8792	4.58041	33.6743	136.905	29.1577	6.94361	19.4143	106.545	16.7762	16.7154	Nontarget	7.07944
Blzf1	171.044	1.19718	0.257579	4.64781	3.35478e-06	1.27833e-05	178.015	175.307	215.708	147.74	180.18	163.979	180.616	123.741	233.822	199.381	220.617	157.395	96.9289	121.186	Nontarget	19.1041
Fam78b	51.4489	-0.689263	0.396946	-1.73642	0.0824905	0.137078	51.7755	55.0702	45.2721	102.114	39.7987	54.0488	43.4704	60.554	33.6435	39.6777	45.8883	53.2723	50.3285	45.3703	Nontarget	5.83906
Plekha6	276.256	2.32614	0.359357	6.47306	9.60402e-11	6.00061e-10	369.991	347.86	271.633	126.013	278.591	349.027	245.516	263.278	399.796	485.06	289.449	186.453	129.549	125.365	Nontarget	10.262
Nfasc	46.4878	-4.56298	0.550878	-8.28309	1.20015e-16	1.32048e-15	18.0342	22.9459	17.3099	56.4887	23.1556	15.5734	14.082	31.5934	25.2326	18.8469	22.9442	113.809	123.957	146.856	Nontarget	8.17199
Ubr4	4498.93	-0.757464	0.344806	-2.19678	0.0280361	0.0535635	5349.75	1809.05	5101.1	4469.13	4799.73	3478.36	4214.18	6760.99	5301.09	3644.4	4515.88	3607.99	4939.65	4993.72	Nontarget	177.612
Mocs3	27.6005	0.0832501	0.496548	0.167658	0.866853	0.906489	26.1786	31.2064	14.6469	21.7264	27.4973	43.0558	30.0007	23.695	22.9897	31.7422	20.0026	19.3718	37.2803	37.0126	Nontarget	17.578
Svip	36.0341	0.255072	0.577023	0.442049	0.658454	0.741607	41.304	32.1243	39.946	32.5896	48.4821	23.8181	41.6336	5.26557	48.2223	36.7019	30.5922	55.6938	31.6883	36.4156	Nontarget	8.32957
Uqcc3	54.5738	0.60549	0.441171	1.37246	0.16992	0.252937	47.7033	43.1383	89.2127	47.7981	70.1905	33.895	76.5324	55.2884	75.6978	35.71	53.5364	79.9085	27.9603	27.461	Nontarget	28.8891
A130010J15Rik	53.0947	0.0610456	0.401845	0.151913	0.879255	0.915372	45.3763	73.4269	35.9514	52.1434	52.8238	50.3845	64.8995	44.7573	46.5401	69.4361	37.652	50.8509	60.5806	58.5038	Nontarget	11.308
Tmem74b	5.48583	0.373343	1.48993	0.250578	0.80214	0.85684	0.581747	14.6854	1.33153	4.34528	0	9.16082	3.67356	0	6.16797	10.9114	3.52987	2.42147	7.45607	12.5365	Nontarget	4.97594
Ssc4d	5.83129	-1.12524	1.025	-1.0978	0.272293	0.372602	4.65398	8.26052	5.32613	4.34528	5.78891	2.74825	4.89807	13.1639	2.80362	6.94361	2.94156	2.42147	8.38808	8.95466	Nontarget	1.975
Tent5a	69.8108	0.64168	0.420777	1.52499	0.127262	0.19869	106.46	16.521	86.5496	91.251	107.095	13.7412	106.533	65.8196	111.584	20.8308	107.661	118.652	12.1161	12.5365	Nontarget	1.61262
Megf8	228.562	-2.21275	0.303026	-7.3022	2.83102e-13	2.27945e-12	247.243	147.772	231.687	347.623	178.009	113.594	132.86	297.505	190.086	121.017	177.67	273.626	366.279	374.902	Nontarget	19.7942
Triml2	7.58967	-0.445761	1.40466	-0.317345	0.750982	0.816656	1.74524	8.26052	2.66307	0	2.89445	18.3216	7.95937	0	6.72869	11.9033	0.588312	12.1073	13.9801	19.1033	Nontarget	8.4081
Optc	31.8686	-1.01703	0.472879	-2.15072	0.0314979	0.0592594	29.6691	17.4389	31.9568	32.5896	31.1154	18.3216	36.7356	28.9606	32.522	19.8389	41.7701	65.3797	27.0283	32.8338	Nontarget	13.5646
Ppp2r3a	425.45	0.80531	0.206408	3.90155	9.55791e-05	0.000298477	607.926	204.677	619.163	397.594	653.423	241.846	566.34	376.488	682.962	250.962	617.727	251.833	244.186	241.179	Nontarget	24.5297
Rin3	170.536	1.96431	0.413279	4.75298	2.00439e-06	7.842e-06	219.9	30.2886	241.007	247.681	220.702	34.8111	247.353	363.324	236.065	36.7019	255.327	239.725	7.45607	7.16373	Nontarget	1.16208
Ss18	459.843	1.21621	0.158421	7.67707	1.62769e-14	1.47144e-13	563.713	427.712	617.831	306.343	552.117	398.496	566.34	394.917	625.208	401.737	605.373	423.757	273.079	281.176	Nontarget	60.7835
Grhl1	39.389	-1.4821	0.418252	-3.54355	0.000394785	0.00111514	18.6159	50.481	22.6361	39.1076	14.4723	51.3006	15.9187	47.3901	19.0646	74.3958	17.061	26.6362	77.3567	77.0101	Nontarget	15.5583
Ikbkg	260.586	0.352337	0.21208	1.66134	0.0966444	0.156952	342.649	187.239	292.937	297.652	284.38	198.79	271.231	373.855	336.435	203.348	298.862	256.676	151.917	152.229	Nontarget	14.3298
Cdkn1c	114.488	1.67679	0.390136	4.29797	1.72369e-05	5.99446e-05	118.095	146.854	98.5334	52.1434	159.195	178.636	145.718	65.8196	112.706	111.098	141.783	29.0576	135.141	108.053	Nontarget	40.6755
Tfeb	34.8911	0.658229	0.486423	1.3532	0.175991	0.260286	15.1254	60.5772	17.3099	26.0717	35.4571	74.2026	24.4904	34.2262	22.429	60.5086	23.5325	31.4791	32.6203	30.4459	Nontarget	8.94465
Glmn	126.433	1.60344	0.421555	3.80365	0.000142582	0.000433864	103.551	155.114	137.148	49.9708	151.959	261.999	110.207	23.695	97.0053	194.421	98.8364	75.0655	146.325	164.766	Nontarget	73.0826
Palm	224.195	1.44157	0.26765	5.38604	7.2025e-08	3.34726e-07	214.665	344.188	234.35	134.704	225.044	315.132	250.414	157.967	225.972	368.011	149.431	145.288	178.946	194.615	Nontarget	43.698
Fmo5	61.1312	0.230629	0.45904	0.502415	0.615376	0.70618	48.285	74.3447	45.2721	49.9708	39.7987	87.0278	36.7356	121.108	64.4833	94.2346	50.5948	48.4294	46.6004	48.9522	Nontarget	6.11596
Galnt6	72.3984	-2.89183	0.546855	-5.28811	1.23584e-07	5.58169e-07	44.2128	73.4269	30.6252	126.013	36.9043	58.6292	19.5923	34.2262	42.615	49.5972	28.8273	62.9582	220.886	185.063	Nontarget	21.6097
Trim32	286.262	1.1216	0.216714	5.17551	2.27289e-07	9.94489e-07	357.774	226.705	370.166	278.098	337.204	255.587	288.374	413.347	347.649	252.946	338.868	309.948	121.161	109.844	Nontarget	23.2651
Mfap2	27.4465	-3.26134	0.728933	-4.47413	7.67231e-06	2.79772e-05	8.14446	14.6854	14.6469	26.0717	13.025	17.4056	14.082	123.741	7.28942	13.8872	7.05974	84.7514	16.7762	22.6851	Nontarget	13.5067
Kdm4a	438.623	1.46502	0.233567	6.27238	3.55576e-10	2.10467e-09	673.081	292.79	579.217	282.443	610.73	322.461	531.441	479.167	624.086	376.939	603.608	385.014	184.538	195.212	Nontarget	27.5739
T2	14.5897	-3.86203	1.19794	-3.22389	0.00126462	0.00324521	11.0532	8.26052	7.9892	21.7264	2.17084	4.58041	0.612259	18.4295	8.41086	2.97583	14.7078	72.6441	13.9801	16.7154	Nontarget	6.51432
Miga1	124.652	-1.61248	0.389144	-4.14367	3.41795e-05	0.000114203	205.357	37.6313	171.768	212.919	96.9642	33.895	123.064	157.967	160.928	42.6536	138.253	171.924	103.453	88.3527	Nontarget	13.5011
Arhgap4	11.9151	-0.676194	0.713191	-0.948125	0.343066	0.448857	9.8897	14.6854	9.32073	8.69057	11.5778	15.5734	12.2452	15.7967	7.85014	9.91944	5.29481	14.5288	17.7082	13.7305	Nontarget	2.96548
Lck	16.3381	-1.30832	0.705654	-1.85405	0.0637317	0.109849	8.14446	17.4389	6.65766	21.7264	6.51252	22.902	15.3065	7.89835	12.8967	23.8066	5.88312	21.7932	34.4843	23.2821	Nontarget	9.77872
Arrdc1	20.0443	-0.763893	0.52909	-1.44379	0.148799	0.226891	9.8897	33.9599	10.6523	28.2443	6.51252	32.9789	11.0207	42.1245	8.41086	31.7422	8.23636	24.2147	17.7082	14.9244	Nontarget	5.94916
Mpst	30.023	0.0520025	0.635836	0.0817861	0.934817	0.954394	27.9239	10.0962	39.946	32.5896	41.9696	7.32866	44.0827	71.0851	46.5401	5.95166	37.0636	43.5864	5.59205	6.56675	Nontarget	3.44508
Fzd6	62.0553	-2.02321	0.649816	-3.1135	0.00184879	0.00459446	88.4256	27.5351	87.8812	186.847	44.1404	15.5734	58.7769	110.577	55.5117	10.9114	54.1247	46.0079	40.0764	42.3854	Nontarget	6.82441
Dguok	59.2554	-0.142342	0.598606	-0.23779	0.812044	0.864551	29.6691	106.469	70.5712	32.5896	23.8792	97.1047	42.8582	26.3278	40.3721	75.3877	31.7688	87.1729	84.8128	80.592	Nontarget	67.2821
Fam174b	30.4547	0.276223	0.472579	0.584501	0.558883	0.657	24.4334	43.1383	26.6307	32.5896	36.1807	23.8181	26.9394	44.7573	30.2791	31.7422	30.5922	31.4791	20.5042	23.2821	Nontarget	5.33494
Sh3d21	43.7519	1.12151	0.431271	2.60047	0.00930959	0.0199857	48.8668	61.495	27.9622	26.0717	45.5876	54.0488	51.4298	21.0623	52.1474	55.5488	43.5351	21.7932	45.6684	57.3098	Nontarget	15.8555
9330159F19Rik	37.7343	-2.3648	0.694892	-3.40312	0.00066622	0.00180343	38.3953	25.6994	19.973	95.5963	28.9445	7.32866	30.613	57.9212	34.7649	2.97583	35.887	104.123	25.1642	20.8942	Nontarget	2.95364
Odf2l	74.0811	0.505362	0.32622	1.54914	0.121347	0.190662	89.5891	59.6593	79.892	63.0066	94.0698	58.6292	107.145	57.9212	83.5479	46.6214	112.368	67.8011	57.7845	59.1008	Nontarget	19.195
Nsmce4a	293.115	2.59923	0.209747	12.3922	2.88021e-35	1.09421e-33	417.694	212.02	426.09	173.811	460.942	221.692	478.787	136.905	486.709	197.397	525.951	159.817	102.521	103.277	Nontarget	59.236
Ttbk1	68.2692	0.619175	0.365582	1.69367	0.090328	0.148165	45.3763	139.511	43.9406	65.1793	46.3113	111.762	43.4704	31.5934	46.5401	144.824	34.7104	75.0655	54.0565	73.4282	Nontarget	5.13436
Rab11fip3	661.147	1.54437	0.259392	5.95381	2.61977e-09	1.42603e-08	1016.31	296.461	846.855	491.017	1039.11	309.636	1007.78	600.275	1321.63	426.536	907.765	552.095	205.974	234.612	Nontarget	27.3059
Exoc7	164.468	1.36505	0.250733	5.44426	5.20204e-08	2.45696e-07	188.486	169.8	221.034	104.287	203.335	198.79	176.331	121.108	171.582	206.324	181.788	108.966	106.249	144.469	Nontarget	22.0237
Fam183b	5.3322	1.9141	1.42268	1.34542	0.178489	0.263461	1.74524	13.7675	3.9946	0	2.89445	12.8251	1.83678	0	1.68217	10.9114	7.05974	4.84294	6.52406	6.56675	Nontarget	15.1605
Syce3	14.5473	0.407683	1.3458	0.30293	0.761944	0.825805	3.49048	25.6994	1.33153	0	2.17084	26.5664	4.28582	0	0.560724	24.7986	2.35325	2.42147	56.8525	53.131	Nontarget	201.139
Cplane1	802.278	1.13663	0.222946	5.09823	3.42846e-07	1.47395e-06	680.644	1090.39	667.098	504.053	607.112	1529.86	597.565	502.862	634.74	1668.45	594.195	368.063	908.709	878.154	Nontarget	54.2982
Sesn1	261.212	0.757194	0.210268	3.60109	0.000316886	0.000913936	268.767	242.309	247.665	219.437	323.455	284.901	276.741	252.747	326.902	289.648	285.331	249.411	208.77	180.884	Nontarget	46.6698
Gm3604	48.1891	-1.02493	0.588002	-1.74308	0.0813205	0.135419	54.6842	13.7675	58.5874	78.2151	41.9696	23.8181	73.4711	15.7967	56.6331	28.7664	71.774	33.9006	60.5806	62.6826	Nontarget	17.1445
Zfp934	87.1563	-1.35242	0.384796	-3.51464	0.000440346	0.00123425	91.3343	30.2886	79.892	121.668	99.8587	37.5594	131.023	144.803	107.659	38.6858	104.131	62.9582	88.5408	81.7859	Nontarget	32.6526
Dennd4a	491.223	1.45038	0.257844	5.62502	1.85482e-08	9.18574e-08	506.702	519.495	443.4	341.105	521.002	627.516	470.215	450.206	647.637	788.595	520.656	443.129	316.883	280.579	Nontarget	23.2476
Zc3h12c	136.254	0.495033	0.284345	1.74096	0.0816909	0.135913	192.558	32.1243	206.388	162.948	193.928	34.8111	211.229	165.865	205.225	31.7422	219.44	196.139	28.8923	26.267	Nontarget	3.13735
Zfp931	18.4839	-3.31689	0.800773	-4.14211	3.44124e-05	0.000114889	8.14446	3.67134	7.9892	32.5896	11.5778	6.41257	22.6536	50.0229	23.5504	5.95166	17.6494	19.3718	28.8923	20.2972	Nontarget	11.4921
Rasl12	167.455	-0.4748	0.288671	-1.64478	0.100015	0.161537	214.083	30.2886	218.371	249.854	206.953	32.9789	229.597	234.318	243.354	32.7341	242.973	336.584	31.6883	40.5945	Nontarget	10.1869
Fam84b	24.9021	-3.07525	0.654782	-4.6966	2.64526e-06	1.02044e-05	20.3611	7.34269	15.9784	60.834	35.4571	7.32866	24.4904	39.4917	14.5788	8.92749	20.5909	21.7932	41.0084	30.4459	Nontarget	4.44207
Rmi2	157.753	-5.66538	0.571082	-9.92043	3.39289e-23	6.16164e-22	65.1557	53.2345	62.582	436.701	71.6377	10.993	69.7976	305.403	73.4549	10.9114	82.952	542.409	214.362	208.942	Nontarget	40.1338
Dchs1	55.9935	-3.99827	0.568075	-7.03827	1.94646e-12	1.44897e-11	30.2508	30.2886	39.946	91.251	16.6431	18.3216	19.5923	223.787	20.7468	19.8389	16.4727	145.288	49.3965	62.0857	Nontarget	3.02839
Mtx3	134.318	-2.35782	0.3451	-6.83228	8.35776e-12	5.81804e-11	179.76	26.6172	141.142	223.782	184.521	20.1538	148.167	247.482	163.171	23.8066	190.025	128.338	104.385	99.0983	Nontarget	11.5409
Pcx	109.431	0.032909	0.302457	0.108805	0.913357	0.939917	82.0263	192.746	61.2505	45.6255	67.2961	193.293	56.3279	100.046	62.8011	197.397	60.5961	82.33	156.577	173.72	Nontarget	22.9814
Gm8267	6.72455	-2.55063	1.37474	-1.85535	0.0635458	0.109597	1.74524	10.0962	0	19.5538	6.51252	9.16082	0.612259	10.5311	4.48579	5.95166	1.17662	0	11.1841	13.1335	Nontarget	9.46434
Rsph4a	8.40979	-1.00083	0.89657	-1.11629	0.264299	0.363348	7.56271	5.50702	7.9892	10.8632	2.89445	10.0769	6.12259	5.26557	8.97159	7.93555	7.64805	16.9503	13.9801	5.96978	Nontarget	2.04376
Sgsm1	51.0431	-0.0676565	0.437727	-0.154563	0.877166	0.914058	20.3611	82.6052	30.6252	36.9349	31.1154	91.6082	25.1026	23.695	23.5504	120.025	32.3571	65.3797	66.1726	65.0706	Nontarget	8.65503
Crybg2	23.0885	-1.69693	0.599829	-2.82902	0.00466908	0.0107079	4.65398	43.1383	7.9892	32.5896	6.51252	36.6433	10.4084	15.7967	8.97159	46.6214	4.11818	12.1073	44.7364	48.9522	Nontarget	5.74643
Megf6	20.86	-4.70169	0.604137	-7.78249	7.11119e-15	6.65079e-14	11.6349	13.7675	5.32613	32.5896	5.78891	9.16082	5.51033	34.2262	6.16797	6.94361	10.0013	46.0079	49.3965	55.5189	Nontarget	4.07134
Eml2	60.0091	1.3804	0.383953	3.59523	0.000324101	0.000932954	47.1215	98.2084	42.609	34.7623	43.4168	120.923	48.3685	21.0623	58.3153	118.041	40.0052	38.7435	73.6287	54.9219	Nontarget	16.5955
Fnip2	455.469	0.913365	0.19878	4.59485	4.33059e-06	1.62764e-05	293.201	810.449	251.66	186.847	290.169	940.816	279.19	276.442	321.856	996.903	290.038	251.833	633.766	553.398	Nontarget	54.4393
Tnik	909.061	1.84055	0.299562	6.14415	8.03946e-10	4.5798e-09	1819.12	181.731	1645.77	823.431	1551.43	165.811	1151.05	871.451	1820.11	281.712	1373.12	825.721	98.7929	117.605	Nontarget	10.0615
Ythdc2	164.425	1.44323	0.247577	5.82943	5.56167e-09	2.9197e-08	182.669	210.184	151.795	69.5246	192.481	218.944	148.779	63.1868	179.432	236.083	181.788	96.8588	192.926	177.302	Nontarget	20.7169
Gprasp2	286.525	2.05837	0.239053	8.6105	7.27402e-18	8.80663e-17	475.287	124.826	392.802	254.199	478.309	138.328	404.703	286.973	529.324	138.872	413.583	266.362	54.0565	53.728	Nontarget	9.22292
Dnajc13	962.516	1.87	0.191637	9.75804	1.70414e-22	2.90037e-21	1114.05	1073.87	1065.23	510.571	1023.91	1512.45	982.064	610.806	1056.97	1535.53	1026.6	549.674	750.267	663.242	Nontarget	60.112
Tent5d	36.5164	-0.0377429	0.574275	-0.0657227	0.947599	0.963338	68.0644	9.17836	45.2721	32.5896	60.7835	8.24474	51.4298	5.26557	74.0156	12.8953	60.0078	16.9503	37.2803	29.2519	Nontarget	8.93109
Cog5	132.549	0.0732434	0.287566	0.254701	0.798954	0.85432	130.893	142.265	89.2127	89.0783	117.225	154.818	135.309	86.8818	119.434	175.574	127.664	128.338	203.178	155.811	Nontarget	42.3513
Macc1	14.5449	2.34432	0.988378	2.37189	0.0176973	0.0355798	9.8897	16.521	10.6523	8.69057	11.5778	43.9719	12.2452	13.1639	10.6538	44.6375	2.94156	0	12.1161	6.56675	Nontarget	1.87774
Card6	108.982	1.93612	0.304518	6.35799	2.04415e-10	1.23787e-09	94.243	202.842	91.8757	49.9708	72.3613	206.118	87.5531	73.7179	94.7624	253.938	71.774	82.33	70.8327	73.4282	Nontarget	9.63017
Pcyt1a	370.344	1.17149	0.230061	5.09211	3.54105e-07	1.51801e-06	566.622	160.621	560.575	273.753	593.363	201.538	509.4	434.409	525.399	207.316	501.242	401.964	128.617	119.992	Nontarget	16.0659
Lix1l	161.852	0.635582	0.276651	2.29741	0.0215953	0.0424559	205.357	100.044	242.339	119.495	234.451	78.783	227.76	194.826	198.496	110.106	198.849	196.139	81.0848	78.2041	Nontarget	23.4485
Begain	57.1037	-1.14071	0.604274	-1.88774	0.0590605	0.102968	24.4334	76.1804	26.6307	47.7981	25.3265	101.685	28.1639	147.436	25.2326	109.114	18.826	26.6362	66.1726	75.8161	Nontarget	16.6015
Enthd1	11.6487	-0.4924	0.790011	-0.623283	0.533099	0.634726	4.07223	24.7816	5.32613	4.34528	2.17084	27.4825	2.44904	10.5311	5.04652	29.7583	3.52987	12.1073	11.1841	20.2972	Nontarget	4.97301
Nqo2	56.0909	0.475217	0.368217	1.29059	0.196846	0.285784	77.3724	42.2204	58.5874	71.6972	80.3211	37.5594	68.573	42.1245	67.8476	31.7422	74.1273	70.2226	35.4163	27.461	Nontarget	5.34753
Zfp729b	237.256	1.34093	0.256549	5.22678	1.72485e-07	7.65438e-07	172.197	365.299	191.741	86.9057	162.813	520.335	181.841	105.311	192.328	439.431	173.552	113.809	348.571	267.446	Nontarget	51.4789
Baiap3	17.1986	0.999643	0.800507	1.24876	0.211752	0.303537	2.90874	52.3166	6.65766	4.34528	3.61807	44.888	4.89807	0	4.48579	52.573	5.88312	9.68588	27.0283	21.4912	Nontarget	3.06372
Susd1	56.935	-2.25605	0.481168	-4.6887	2.74949e-06	1.05793e-05	19.7794	76.1804	23.9676	43.4528	14.4723	67.7901	26.3271	21.0623	21.8682	64.4763	29.4156	82.33	160.306	145.663	Nontarget	33.1864
Tubgcp6	255.818	0.257978	0.222199	1.16102	0.245632	0.342616	184.996	368.97	147.8	204.228	178.733	469.034	167.147	179.029	155.321	494.98	179.435	162.238	320.611	368.932	Nontarget	28.4158
2700049A03Rik	197.668	0.372523	0.256396	1.45292	0.146245	0.223678	127.403	303.804	127.827	117.323	129.527	374.677	121.84	184.295	122.799	366.027	160.021	106.545	272.147	253.118	Nontarget	30.7591
Agpat1	110.762	-3.29289	0.369776	-8.90508	5.33495e-19	7.00281e-18	91.916	48.6453	90.5442	241.163	65.1252	32.0629	54.4911	305.403	62.8011	48.6052	74.1273	184.032	117.433	134.32	Nontarget	37.8165
Evl	714.685	1.16272	0.201523	5.76968	7.94236e-09	4.1133e-08	1009.91	252.405	913.431	686.555	1104.96	272.992	1093.5	960.966	1120.89	296.591	1048.37	949.216	137.005	158.796	Nontarget	46.9681
Elavl4	7.08241	1.47693	1.12761	1.30979	0.190266	0.277964	8.14446	7.34269	5.32613	0	11.5778	10.0769	8.57163	5.26557	4.48579	9.91944	5.88312	2.42147	11.1841	8.95466	Nontarget	2.0453
Ppp2r3d	37.4379	-0.733295	0.54345	-1.34933	0.17723	0.26186	27.3421	33.9599	51.9298	49.9708	23.1556	25.6503	30.613	36.859	32.522	44.6375	22.3558	82.33	33.5523	29.2519	Nontarget	4.78557
Tatdn3	14.1882	0.866089	0.749991	1.1548	0.248172	0.345169	13.3802	16.521	19.973	15.2085	7.95975	15.5734	17.1433	2.63278	11.2145	19.8389	20.0026	9.68588	13.9801	15.5214	Nontarget	8.56714
Cops9	9.55602	-4.53931	1.70722	-2.65888	0.00784	0.0171177	1.74524	12.8497	0	13.0359	0	1.83216	0	2.63278	6.72869	6.94361	5.29481	31.4791	27.9603	23.2821	Nontarget	120.24
Tmem258	18.9097	-2.97162	0.808961	-3.67338	0.000239368	0.000704629	3.49048	33.0421	9.32073	17.3811	5.06529	26.5664	1.22452	7.89835	3.92507	11.9033	7.05974	19.3718	60.5806	57.9068	Nontarget	280.769
Hspa5	825.698	-2.04669	0.543949	-3.76265	0.000168124	0.000506457	1591.08	367.134	1061.23	1888.03	675.855	201.538	568.177	905.677	881.459	206.324	803.046	711.912	835.08	863.23	Nontarget	208.671
Smim10l1	487.883	2.18412	0.340411	6.41614	1.39775e-10	8.5839e-10	744.055	82.6052	781.61	321.551	1094.1	59.5453	1023.7	452.839	892.112	46.6214	971.303	288.155	36.3483	35.8187	Nontarget	12.3235
Trpc4ap	447.357	1.24434	0.212274	5.86195	4.57465e-09	2.42777e-08	286.22	764.557	342.204	182.502	337.204	916.998	320.212	252.747	301.109	918.54	364.753	295.419	502.353	478.179	Nontarget	96.9153
Mapk8ip3	212.267	-1.47026	0.280594	-5.23981	1.60739e-07	7.17745e-07	178.596	171.635	171.768	252.027	157.024	163.063	161.024	334.363	153.078	185.493	213.557	171.924	342.979	315.204	Nontarget	33.975
Prorsd1	60.4664	-0.617168	0.47261	-1.30587	0.191596	0.279513	63.9922	55.0702	41.2775	65.1793	88.2808	52.2167	59.3892	28.9606	48.783	52.573	47.0649	79.9085	90.4048	73.4282	Nontarget	30.7354
Tbck	248.785	-0.0660051	0.286129	-0.230683	0.817561	0.869147	293.782	154.196	209.051	258.544	292.34	210.699	291.435	184.295	298.866	230.131	284.743	319.634	230.206	225.061	Nontarget	23.0132
Cox18	16.3151	0.561399	0.880053	0.637915	0.523529	0.625585	10.4714	41.3026	6.65766	0	13.7487	33.895	6.73485	13.1639	8.97159	29.7583	5.29481	29.0576	10.2521	19.1033	Nontarget	8.41847
Rhpn1	50.6164	0.873875	0.481801	1.81377	0.0697135	0.118686	30.2508	115.647	29.2937	8.69057	37.6279	103.517	29.3884	44.7573	34.7649	81.3394	24.1208	14.5288	78.2887	76.4131	Nontarget	20.479
Zfp746	128.287	0.492233	0.349136	1.40986	0.158581	0.239138	107.623	152.361	113.18	60.834	104.924	161.23	107.145	157.967	130.088	217.236	110.014	125.916	115.569	131.932	Nontarget	20.0434
Rpl30	519.966	-2.21191	0.392702	-5.63254	1.77577e-08	8.80743e-08	224.554	551.619	355.519	842.985	298.129	348.111	428.582	468.635	308.398	419.592	323.571	380.171	1186.45	1143.21	Nontarget	3396.25
Pfkm	189.125	2.55835	0.286935	8.91613	4.82853e-19	6.3735e-18	220.482	217.527	210.382	82.5604	230.833	292.23	199.597	155.334	265.783	275.76	207.086	125.916	78.2887	85.9648	Nontarget	17.795
Elmsan1	223.607	0.642324	0.200107	3.2099	0.00132781	0.00338999	286.22	145.936	264.975	228.127	280.038	151.154	263.271	321.2	257.933	171.606	266.505	302.684	94.1329	96.7104	Nontarget	7.97865
Ccdc166	30.8451	-1.05271	0.524138	-2.00847	0.0445936	0.0805151	18.0342	41.3026	23.9676	43.4528	10.1306	37.5594	20.8168	31.5934	21.8682	45.6294	17.061	12.1073	52.1925	56.1159	Nontarget	16.0407
Clhc1	7.98431	2.60746	1.49338	1.74601	0.0808101	0.134732	1.74524	10.0962	13.3153	0	7.23613	10.993	3.67356	0	7.85014	5.95166	7.05974	0	22.3682	21.4912	Nontarget	8.28585
Itpripl1	84.798	-2.87772	0.376254	-7.64835	2.03578e-14	1.81562e-13	70.9731	34.8778	66.5766	267.235	53.5474	30.2307	60.0014	144.803	57.1939	36.7019	58.2429	145.288	68.9686	92.5315	Nontarget	14.2552
Pou2f2	33.854	0.173982	0.46187	0.376691	0.706403	0.781051	20.9429	70.6734	14.6469	10.8632	18.814	66.874	18.3678	31.5934	18.5039	66.4602	12.9429	21.7932	53.1245	48.3552	Nontarget	9.08114
Lrriq1	17.1432	-1.53743	0.711837	-2.15981	0.0307876	0.058095	21.5246	11.014	5.32613	43.4528	11.5778	12.8251	15.3065	23.695	17.3825	8.92749	18.826	14.5288	17.7082	17.9093	Nontarget	2.59015
Naf1	142.975	1.53017	0.257797	5.93557	2.92834e-09	1.58824e-08	164.053	155.114	149.132	76.0425	201.888	150.237	175.718	63.1868	199.057	159.703	170.022	94.4373	116.501	126.559	Nontarget	32.1174
Crb2	14.0882	-1.83501	0.764455	-2.40041	0.0163767	0.0331667	4.65398	16.521	9.32073	21.7264	7.23613	13.7412	13.4697	21.0623	2.2429	19.8389	7.05974	19.3718	17.7082	23.2821	Nontarget	1.73291
Fam102b	289.626	0.851389	0.210184	4.05069	5.10673e-05	0.000166392	391.516	94.5371	450.058	260.717	456.6	123.671	489.195	310.668	445.215	112.09	443.587	288.155	86.6768	102.083	Nontarget	12.0965
Parp10	66.0815	0.704527	0.369961	1.90433	0.0568676	0.0995756	41.8858	120.236	38.6144	52.1434	39.0751	149.321	37.9601	34.2262	49.3437	113.082	48.2416	33.9006	97.8609	69.2494	Nontarget	14.0903
Nhsl2	344.265	0.0251849	0.416744	0.0604325	0.951811	0.966609	367.082	89.9479	400.791	306.343	427.656	96.1886	442.051	974.13	395.871	101.178	421.82	678.011	64.3086	54.325	Nontarget	2.81526
Ascl4	14.926	-2.22081	0.941467	-2.35888	0.01833	0.0367267	16.8707	11.9319	18.6415	54.3161	10.8542	4.58041	10.4084	15.7967	7.28942	1.98389	16.4727	12.1073	13.9801	13.7305	Nontarget	11.2974
Prepl	227.621	2.21786	0.240408	9.22541	2.82476e-20	4.14583e-19	276.912	324.914	271.633	132.531	261.948	369.181	219.189	86.8818	239.429	355.116	205.909	111.388	168.694	162.975	Nontarget	31.4869
Sult6b1	8.03017	-1.05566	1.07547	-0.981578	0.326308	0.431095	6.39922	8.26052	1.33153	19.5538	10.1306	10.993	5.51033	0	6.16797	5.95166	7.05974	2.42147	14.9121	13.7305	Nontarget	5.60107
Jakmip2	42.6903	2.12269	0.522017	4.06632	4.77616e-05	0.000156206	61.0834	47.7275	50.5982	47.7981	61.5071	33.895	50.8175	18.4295	36.4471	64.4763	55.8896	33.9006	19.5722	15.5214	Nontarget	3.2745
Cfap70	18.7957	0.843682	0.816128	1.03376	0.301247	0.404166	19.1977	35.7956	9.32073	15.2085	7.95975	44.888	7.95937	0	8.41086	30.7503	10.5896	2.42147	35.4163	35.2217	Nontarget	6.49369
Chn2	38.6982	-0.227435	0.532466	-0.427135	0.669281	0.750427	21.5246	84.4409	35.9514	41.2802	19.5376	56.7971	18.3678	47.3901	25.2326	51.5811	22.3558	12.1073	56.8525	48.3552	Nontarget	12.0973
Telo2	131.222	0.464047	0.304853	1.5222	0.127959	0.199646	107.041	171.635	77.2289	95.5963	104.2	236.349	80.206	89.5146	91.9588	247.986	114.721	123.495	149.121	148.05	Nontarget	25.5842
Nucb1	181.297	-1.58689	0.394974	-4.01771	5.87653e-05	0.000189235	289.128	121.154	207.719	193.365	166.431	85.1956	124.901	202.724	177.189	74.3958	164.727	167.081	274.011	290.131	Nontarget	65.7671
Abcc4	105.68	-3.43827	0.527801	-6.51434	7.30103e-11	4.61756e-10	62.2469	85.3587	55.9244	156.43	47.7585	57.7132	22.0413	73.7179	48.2223	74.3958	31.1805	67.8011	343.911	352.814	Nontarget	37.9726
Dok5	9.61806	-3.13718	1.0928	-2.87077	0.00409475	0.00950553	1.16349	8.26052	3.9946	30.417	5.78891	4.58041	5.51033	7.89835	2.80362	7.93555	0.588312	41.165	5.59205	8.95466	Nontarget	3.18058
Pnpla2	86.0869	2.05796	0.471777	4.36215	1.28788e-05	4.56628e-05	94.8248	88.1122	135.816	58.6613	102.753	105.349	98.5737	121.108	117.752	102.17	63.5377	53.2723	38.2124	25.0731	Nontarget	7.34856
Fbxo6	23.8252	-0.2185	0.608436	-0.359117	0.719507	0.791228	15.1254	29.3707	33.2883	21.7264	19.5376	38.4754	15.9187	10.5311	12.3359	27.7744	14.1195	16.9503	35.4163	42.9824	Nontarget	22.4736
Tsr3	96.8736	2.49058	0.37549	6.63289	3.29169e-11	2.16124e-10	85.5168	160.621	74.5658	34.7623	99.8587	200.622	106.533	18.4295	103.734	134.904	108.838	33.9006	89.4728	104.471	Nontarget	69.3965
4930563E22Rik	37.2068	-1.76461	0.45994	-3.8366	0.00012475	0.00038263	29.6691	25.6994	26.6307	45.6255	39.0751	13.7412	38.5723	50.0229	42.615	19.8389	38.8286	46.0079	63.3766	41.1914	Nontarget	11.4539
Ccdc167	35.7923	-4.12566	0.64621	-6.3844	1.72069e-10	1.0493e-09	33.7413	9.17836	23.9676	76.0425	18.814	5.49649	41.6336	18.4295	27.4755	6.94361	33.5338	62.9582	73.6287	69.2494	Nontarget	9.34515
Nlrx1	35.5005	-0.14156	0.527227	-0.268499	0.788315	0.846091	18.0342	64.2485	13.3153	6.51793	22.432	63.2097	18.3678	31.5934	15.7003	75.3877	21.1792	38.7435	43.8044	64.4736	Nontarget	8.09233
Spsb3	98.0081	-0.688449	0.317982	-2.16505	0.0303835	0.0574243	37.2318	175.307	41.2775	52.1434	51.3766	211.615	32.4497	68.4524	44.8579	167.638	32.3571	58.1153	195.722	203.569	Nontarget	70.2051
Rab3gap2	528.926	2.28293	0.203286	11.2302	2.89977e-29	7.72928e-28	414.204	972.906	367.503	186.847	369.766	1345.72	353.886	179.029	400.357	1263.74	351.81	174.346	506.081	518.773	Nontarget	47.4755
Skor1	7.90474	0.00676654	0.964046	0.0070189	0.9944	0.996087	1.74524	17.4389	3.9946	8.69057	2.17084	19.2377	2.44904	5.26557	1.12145	22.8147	4.70649	2.42147	10.2521	8.35769	Nontarget	1.65842
Dhx57	171.57	0.259177	0.283196	0.915186	0.360094	0.4668	210.011	164.293	195.735	193.365	156.301	152.07	170.82	115.842	225.972	146.808	178.258	213.089	137.937	141.484	Nontarget	18.2694
6430548M08Rik	43.2876	0.0532996	0.362202	0.147154	0.88301	0.917545	31.9961	54.1523	37.2829	39.1076	43.4168	55.881	36.1233	47.3901	37.0078	53.565	35.2987	46.0079	49.3965	39.4005	Nontarget	5.50298
Tcf19	29.2231	-0.882142	0.56822	-1.55247	0.120551	0.189718	22.6881	17.4389	21.3045	30.417	29.6682	24.7342	36.1233	68.4524	19.6253	15.8711	36.4753	43.5864	24.2322	18.5063	Nontarget	9.29447
Wdr90	143.56	-1.27379	0.395033	-3.22452	0.00126183	0.00323854	41.304	270.762	39.946	43.4528	47.0349	283.985	28.1639	131.639	44.2972	323.374	44.7117	123.495	287.991	299.683	Nontarget	26.6016
Taok2	554.213	0.928936	0.221689	4.19026	2.78639e-05	9.42251e-05	622.469	591.086	603.184	417.147	555.735	660.495	507.563	637.134	578.667	771.732	569.486	411.65	414.744	417.884	Nontarget	47.6593
Ick	157.329	-0.371819	0.227873	-1.63169	0.102744	0.165219	182.669	116.565	191.741	167.293	154.853	104.433	191.637	202.724	160.928	113.082	154.138	203.403	123.025	136.111	Nontarget	12.5053
C530008M17Rik	127.739	2.772	0.454164	6.10351	1.03762e-09	5.84048e-09	213.501	93.6193	167.773	78.2151	181.627	110.846	175.718	39.4917	139.62	142.84	237.09	133.181	35.4163	39.4005	Nontarget	3.47375
Ppp1r10	481.555	1.80317	0.189788	9.50099	2.07914e-21	3.28488e-20	612.58	652.581	545.928	304.17	494.228	618.355	494.706	418.613	553.435	675.514	493.005	290.576	290.787	297.295	Nontarget	44.1149
Pabpc6	6.5956	-0.460677	1.11588	-0.412836	0.679727	0.759277	10.4714	7.34269	2.66307	6.51793	2.89445	5.49649	10.4084	0	7.28942	2.97583	7.64805	9.68588	11.1841	7.76071	Nontarget	2.13282
Tbc1d24	121.912	-2.01467	0.305394	-6.59696	4.19687e-11	2.72524e-10	94.8248	64.2485	121.169	123.841	92.6225	78.783	119.391	210.623	92.5195	73.4038	110.014	116.231	209.702	199.39	Nontarget	17.5912
Rpl3l	3.69192	1.68882	1.90827	0.885001	0.376156	0.483201	1.74524	4.58918	0	0	1.44723	9.16082	2.44904	0	0	6.94361	5.88312	0	9.32009	10.1486	Nontarget	4.98034
Zfp605	105.425	0.378781	0.296396	1.27796	0.201264	0.291074	108.787	68.8377	137.148	130.359	118.673	65.9579	143.881	105.311	138.499	68.4441	136.488	150.131	41.9404	61.4887	Nontarget	11.8395
Ly6e	151.473	-0.496587	0.303227	-1.63767	0.10149	0.163521	196.631	42.2204	234.35	234.645	169.326	40.3076	175.718	210.623	176.628	36.7019	199.438	319.634	43.8044	40.5945	Nontarget	13.7624
Tank	143.274	0.814663	0.443974	1.83493	0.0665156	0.113899	192.558	33.9599	222.366	271.58	236.622	52.2167	228.373	129.006	211.954	44.6375	220.029	96.8588	38.2124	27.461	Nontarget	12.3978
Timeless	282.595	2.366	0.28349	8.34599	7.0622e-17	7.91254e-16	248.406	403.848	245.002	106.459	285.827	552.397	250.414	165.865	280.923	599.134	279.448	77.487	234.866	226.254	Nontarget	30.7746
Homer2	114.766	0.905851	0.276093	3.28096	0.00103453	0.0027026	105.296	160.621	103.86	65.1793	104.924	150.237	107.145	65.8196	121.677	144.824	125.899	53.2723	169.626	128.35	Nontarget	8.87635
Tnfrsf19	11.0727	-0.938847	0.826788	-1.13554	0.256151	0.354506	11.6349	10.0962	3.9946	13.0359	14.4723	11.9091	6.73485	10.5311	4.48579	16.863	5.88312	9.68588	19.5722	16.1184	Nontarget	2.69239
Lsr	418.502	-0.683624	0.529807	-1.29033	0.196938	0.285892	781.868	73.4269	555.249	1433.94	378.45	41.2237	382.662	663.461	461.476	46.6214	435.351	506.087	48.4645	50.7431	Nontarget	14.0641
Mtm1	50.0807	-0.725905	0.548257	-1.32402	0.185496	0.27215	79.6994	10.0962	61.2505	34.7623	61.5071	21.986	74.0834	107.944	75.137	9.91944	60.0078	55.6938	25.1642	23.8791	Nontarget	6.58609
Mmp19	20.7555	-2.25832	0.658402	-3.43	0.000603587	0.00164656	22.6881	6.42485	11.9838	21.7264	14.4723	7.32866	15.9187	57.9212	21.8682	9.91944	16.4727	53.2723	18.6402	11.9396	Nontarget	3.18048
Prkacb	301.609	0.700506	0.27607	2.53742	0.0111673	0.0234767	397.915	107.387	483.346	301.997	428.379	122.755	483.685	437.042	425.029	129.945	475.356	222.775	100.657	106.262	Nontarget	16.7944
Cers3	14.085	-3.56809	1.03625	-3.44327	0.000574719	0.00157614	9.8897	6.42485	11.9838	43.4528	4.34168	7.32866	4.89807	0	13.4574	6.94361	5.29481	24.2147	34.4843	24.4761	Nontarget	6.45466
Fbxl16	44.9891	1.5898	0.453307	3.50712	0.000452987	0.00126604	24.4334	92.7014	25.2991	26.0717	31.839	87.0278	35.511	15.7967	25.7933	116.057	36.4753	43.5864	38.2124	31.0428	Nontarget	5.72649
Nrf1	237.756	0.265697	0.182041	1.45954	0.144416	0.221331	214.665	286.365	227.692	193.365	216.36	277.573	206.944	284.341	231.579	298.575	215.322	234.883	206.906	234.015	Nontarget	47.1152
Tpm1	1307.74	2.70825	0.215948	12.5412	4.44094e-36	1.7988e-34	2034.37	300.132	2094.5	710.454	2626.72	287.65	2832.31	916.209	2493.54	280.72	2594.45	876.572	134.209	126.559	Nontarget	63.0108
Xrra1	24.3498	1.61204	0.76274	2.11349	0.0345593	0.0644103	9.8897	44.974	2.66307	6.51793	11.5778	62.2936	10.4084	0	12.8967	87.291	11.7662	12.1073	34.4843	34.0277	Nontarget	8.21176
Kalrn	192.191	-0.244886	0.322629	-0.759033	0.447833	0.554789	126.821	150.525	122.501	249.854	140.381	212.531	138.371	437.042	167.657	248.978	131.782	375.328	90.4048	98.5013	Nontarget	5.43584
Prrg1	81.1485	-0.243765	0.479055	-0.508847	0.61086	0.702553	142.528	8.26052	130.49	139.049	115.055	8.24474	125.513	107.944	107.659	6.94361	114.132	111.388	9.32009	9.55164	Nontarget	2.04085
Wars	149.815	0.183757	0.253284	0.725499	0.468146	0.574442	114.022	207.431	125.164	82.5604	136.763	219.86	121.84	142.17	105.977	216.244	111.779	157.395	185.47	170.736	Nontarget	49.7544
Slc25a25	82.5965	0.532456	0.307309	1.73264	0.0831595	0.137968	62.2469	138.593	46.6036	63.0066	58.6127	139.244	50.8175	44.7573	62.2404	154.743	66.4792	48.4294	98.7929	121.783	Nontarget	20.4126
Atp13a2	157.564	-1.84123	0.303285	-6.07097	1.27144e-09	7.10818e-09	95.4065	217.527	83.8866	236.818	70.1905	156.65	64.8995	218.521	91.3981	207.316	69.4208	145.288	280.535	268.043	Nontarget	37.7211
Bcas1	36.0626	1.17946	0.509709	2.31398	0.0206687	0.0408235	26.7604	61.495	30.6252	17.3811	18.0903	72.3705	25.7149	15.7967	22.429	62.4924	35.2987	9.68588	57.7845	48.9522	Nontarget	11.2108
Mipol1	108.351	-0.38032	0.611822	-0.621618	0.534193	0.635708	133.22	35.7956	118.506	288.961	144.723	40.3076	153.065	44.7573	162.61	27.7744	148.843	135.602	47.5324	35.2217	Nontarget	24.3506
Cnot4	418.678	0.289545	0.163974	1.7658	0.0774302	0.129963	390.934	386.409	448.726	391.076	439.233	451.628	490.42	415.98	416.618	429.512	454.765	368.063	402.628	375.499	Nontarget	70.5581
Pqlc1	44.395	-1.78867	0.469789	-3.80739	0.000140442	0.000427666	41.304	38.5491	29.2937	102.114	39.7987	28.3985	39.1846	36.859	29.1577	26.7825	37.652	48.4294	64.3086	59.6978	Nontarget	18.8958
Synj1	176.12	0.961138	0.242597	3.96187	7.43651e-05	0.00023593	158.817	223.952	206.388	152.085	161.366	236.349	133.473	147.436	168.778	273.776	171.787	162.238	129.549	139.693	Nontarget	12.3336
Klhl29	69.6584	0.642009	0.395719	1.62238	0.104721	0.168005	75.6271	85.3587	77.2289	43.4528	75.9794	65.9579	70.4098	115.842	68.4084	81.3394	63.5377	46.0079	55.9205	50.1461	Nontarget	4.93945
Syn3	84.1584	-1.27482	0.424637	-3.00215	0.00268079	0.00646001	94.243	81.6874	55.9244	112.977	75.2558	54.0488	56.3279	73.7179	59.9975	60.5086	100.013	135.602	114.637	103.277	Nontarget	11.8444
Papd5	403.189	1.63196	0.199584	8.17684	2.91384e-16	3.10071e-15	417.113	526.838	376.824	260.717	392.922	647.67	364.907	239.583	408.768	727.095	395.346	188.875	345.775	352.217	Nontarget	55.1635
Rnf165	50.6632	-0.853822	0.597203	-1.4297	0.152803	0.231941	36.6501	61.495	14.6469	34.7623	38.3515	43.9719	31.2252	107.944	39.2507	60.5086	34.1221	135.602	30.7563	39.9975	Nontarget	3.00462
Iglon5	15.1895	-2.50436	0.688789	-3.63589	0.000277023	0.000807708	12.2167	11.014	3.9946	30.417	15.1959	7.32866	6.12259	26.3278	10.093	12.8953	8.23636	29.0576	24.2322	15.5214	Nontarget	5.36557
Cpsf4l	13.5085	-2.03214	0.818029	-2.48419	0.0129846	0.0268801	4.65398	22.9459	3.9946	17.3811	4.34168	30.2307	3.67356	31.5934	3.36435	20.8308	1.17662	4.84294	25.1642	14.9244	Nontarget	11.721
Acnat1	60.3801	-5.2607	0.614374	-8.56269	1.10263e-17	1.31948e-16	29.6691	24.7816	27.9622	136.876	18.814	6.41257	20.2046	252.747	33.0827	7.93555	23.5325	108.966	68.9686	85.3678	Nontarget	9.96884
Vill	60.2794	1.18649	0.529679	2.24001	0.0250901	0.0485413	25.5969	128.497	33.2883	2.17264	30.3918	142.909	23.2659	42.1245	20.1861	188.469	22.9442	21.7932	81.0848	81.1889	Nontarget	17.3128
Zfp169	66.6992	-2.58317	0.422199	-6.11838	9.45297e-10	5.34999e-09	51.1937	47.7275	42.609	95.5963	39.0751	32.0629	50.8175	121.108	56.6331	41.6616	44.1234	41.165	141.665	128.35	Nontarget	20.5338
Mosmo	104.935	-1.22254	0.304003	-4.02146	5.78376e-05	0.000186648	112.277	37.6313	141.142	160.776	132.421	25.6503	138.983	118.475	122.799	45.6294	145.901	121.073	85.7448	80.592	Nontarget	12.9291
Zfp961	60.4151	-1.42147	0.391318	-3.63253	0.000280654	0.000817428	46.5398	64.2485	50.5982	47.7981	34.0098	60.4614	49.593	105.311	42.0543	50.5891	40.0052	46.0079	105.317	103.277	Nontarget	28.9285
Zfp512b	327.945	0.20571	0.169234	1.21553	0.224162	0.318011	336.832	266.172	355.519	347.623	377.003	316.048	354.498	310.668	356.06	331.309	340.633	346.27	253.506	299.086	Nontarget	29.4289
Smpd4	288.298	1.31653	0.289372	4.5496	5.37474e-06	1.99155e-05	251.315	450.657	207.719	102.114	269.908	503.845	231.434	244.849	254.008	506.883	269.447	140.445	312.223	291.325	Nontarget	39.7026
Ccdc157	67.6471	-0.894203	0.336773	-2.65521	0.0079259	0.017287	79.6994	49.5631	66.5766	86.9057	61.5071	46.7202	75.9202	47.3901	68.9691	50.5891	60.5961	46.0079	108.113	98.5013	Nontarget	11.9119
Zfp809	97.2966	2.19207	0.50454	4.3447	1.39466e-05	4.9143e-05	184.414	15.6032	182.42	106.459	172.22	12.8251	175.718	65.8196	165.974	10.9114	162.374	94.4373	11.1841	1.79093	Nontarget	3.46827
Cdpf1	31.1953	0.501792	0.467424	1.07353	0.283035	0.384405	24.4334	42.2204	26.6307	17.3811	24.6029	38.4754	32.4497	13.1639	25.2326	45.6294	28.8273	16.9503	49.3965	51.3401	Nontarget	38.1598
Arhgap8	3.56863	1.42156	1.69179	0.840273	0.400756	0.508404	3.49048	3.67134	6.65766	0	0.723613	8.24474	1.22452	0	2.2429	6.94361	1.17662	2.42147	8.38808	4.77582	Nontarget	3.07275
Endov	79.6346	-2.15126	0.358478	-6.0011	1.95983e-09	1.07781e-08	52.939	45.8918	57.2559	143.394	53.5474	34.8111	81.4305	139.538	74.0156	31.7422	75.3039	184.032	63.3766	77.6071	Nontarget	7.904
Trappc9	222.765	-1.26888	0.234802	-5.40405	6.51529e-08	3.03814e-07	209.429	210.184	141.142	319.378	181.627	206.118	137.758	286.973	183.918	206.324	177.082	266.362	279.603	312.816	Nontarget	65.9416
Trank1	3529.65	3.0741	0.265298	11.5874	4.77613e-31	1.42217e-29	7577.84	436.89	5604.42	3962.9	5860.55	431.475	4402.14	4636.33	6258.24	577.311	5630.73	3874.35	80.1528	81.7859	Nontarget	4.63015
Cyfip1	496.445	1.08632	0.279697	3.88393	0.000102782	0.00031892	642.831	339.599	644.462	354.141	665.724	513.922	513.073	550.252	561.285	532.674	617.139	414.071	263.758	337.292	Nontarget	29.9487
Soga1	1221.98	-0.504559	0.349315	-1.44443	0.148619	0.226659	966.282	234.048	960.035	1916.27	921.884	256.503	832.06	4554.71	790.621	273.776	903.647	4317.48	95.0649	85.3678	Nontarget	3.89202
Zfp229	108.135	0.714251	0.342369	2.0862	0.0369601	0.0682386	136.129	64.2485	143.806	108.632	175.114	74.2026	153.065	34.2262	149.153	71.4199	146.49	101.702	81.0848	74.6222	Nontarget	12.8968
Gm6710	185.06	-0.795007	0.287402	-2.76619	0.00567158	0.0127957	246.661	45.8918	258.317	278.098	255.436	62.2936	292.048	173.764	266.344	51.5811	248.856	188.875	91.3369	131.335	Nontarget	22.0151
Sh3pxd2a	496.754	0.143718	0.172835	0.831534	0.405672	0.513269	529.39	396.505	577.885	421.493	618.69	414.985	601.851	558.15	505.773	434.471	538.305	491.558	461.344	404.154	Nontarget	23.6567
Gm10406	8.45302	0.595138	1.74253	0.341536	0.7327	0.801628	15.7072	10.0962	0	4.34528	8.68336	7.32866	10.4084	15.7967	0	15.8711	12.3545	0	11.1841	6.56675	Nontarget	3.56989
Rarres1	51.17	-1.5397	0.85134	-1.80856	0.0705191	0.119848	67.4827	11.014	67.9082	236.818	28.2209	2.74825	32.4497	113.21	33.6435	4.95972	36.4753	70.2226	4.66004	6.56675	Nontarget	3.21818
Adamts20	25.6643	-1.20525	0.579631	-2.07933	0.0375866	0.0692096	16.2889	41.3026	15.9784	54.3161	18.0903	30.2307	11.0207	26.3278	12.3359	29.7583	17.061	12.1073	34.4843	39.9975	Nontarget	3.44533
Map3k20	211.153	0.337345	0.255603	1.3198	0.186902	0.273922	232.699	122.99	245.002	282.443	267.737	119.091	323.273	213.255	231.579	128.953	301.216	288.155	100.657	99.0983	Nontarget	13.18
Coro2a	60.9331	1.82997	0.568161	3.22086	0.00127804	0.00327561	49.4485	85.3587	41.2775	34.7623	65.8488	76.0348	52.6543	39.4917	106.538	84.3152	70.0091	94.4373	24.2322	28.6549	Nontarget	4.31031
Thsd7a	18.4798	-1.9799	0.685366	-2.88881	0.00386697	0.00903258	21.5246	9.17836	18.6415	41.2802	14.4723	12.8251	10.4084	10.5311	11.7752	7.93555	20.0026	38.7435	20.5042	20.8942	Nontarget	1.25159
Slc52a3	68.5942	-0.940882	0.887648	-1.05997	0.289157	0.390505	108.205	9.17836	110.517	306.343	34.7334	7.32866	37.3478	100.046	68.9691	4.95972	38.8286	123.495	5.59205	4.77582	Nontarget	1.48182
Rgs9	25.034	-0.394412	0.734799	-0.536762	0.591432	0.685488	22.1064	32.1243	15.9784	10.8632	25.3265	29.3146	16.531	2.63278	14.5788	28.7664	26.474	48.4294	39.1444	38.2066	Nontarget	3.65586
Nsun6	142.773	-2.49027	0.227968	-10.9238	8.87147e-28	2.12171e-26	91.916	117.483	83.8866	234.645	89.7281	88.8599	94.9002	265.911	93.6409	79.3555	92.9533	292.998	191.062	181.481	Nontarget	19.8757
Pias3	48.179	-1.10847	0.554847	-1.9978	0.045738	0.082333	48.8668	10.0962	65.2451	45.6255	65.1252	3.66433	65.5117	105.311	73.4549	15.8711	70.5974	67.8011	15.8441	21.4912	Nontarget	3.85651
Trim45	72.6352	1.02195	0.358175	2.85321	0.00432802	0.00999928	62.2469	145.018	41.2775	49.9708	47.7585	141.077	39.7969	31.5934	43.7365	141.848	61.1844	38.7435	86.6768	85.9648	Nontarget	14.7784
Phc3	377.719	-0.036215	0.263508	-0.137434	0.890688	0.92378	605.599	91.7836	520.629	319.378	524.62	95.2725	565.728	547.619	565.771	121.017	540.07	542.409	117.433	130.738	Nontarget	7.46803
Hnrnpa1l2-ps2	1204.91	7.0547	1.15285	6.11933	9.39701e-10	5.32197e-09	2569	997.688	2283.58	156.43	2871.3	189.629	2724.55	476.534	2708.3	1316.31	364.165	94.4373	64.3086	52.534	Nontarget	44.7102
Dcaf17	267.188	-0.621878	0.205003	-3.03351	0.00241726	0.00587206	314.725	199.17	255.654	323.724	270.631	163.063	261.435	344.895	325.781	179.542	311.217	276.047	262.826	251.925	Nontarget	45.8218
Ubap2l	1348.43	1.27659	0.183706	6.94908	3.6767e-12	2.65216e-11	1404.34	1765	1383.46	856.021	1316.98	1889.88	1225.13	1355.88	1389.47	1955.12	1338.41	1140.51	885.408	972.476	Nontarget	156.807
Arfrp1	45.5948	-0.416326	2.50991	-0.165873	0.868257	0.907636	0	96.3728	45.2721	0	0	82.4474	38.5723	73.7179	70.0905	30.7503	20.0026	50.8509	48.4645	81.7859	Nontarget	16.3276
Spopl	97.4632	-1.63009	0.426773	-3.81957	0.000133684	0.000408818	96.57	40.3848	103.86	158.603	89.7281	52.2167	127.35	57.9212	106.538	33.7261	111.779	174.346	109.977	101.486	Nontarget	31.6026
Lingo2	17.8303	-2.7297	0.928734	-2.93916	0.00329099	0.00779628	18.0342	8.26052	5.32613	71.6972	14.4723	8.24474	6.12259	18.4295	20.7468	4.95972	18.826	16.9503	21.4362	16.1184	Nontarget	3.37493
Cfap74	54.7527	-0.714814	0.39079	-1.82915	0.0673767	0.11523	50.0303	69.7555	43.9406	84.733	37.6279	51.3006	33.6743	68.4524	55.5117	59.5166	37.652	48.4294	59.6486	66.2645	Nontarget	15.4174
Syde2	138.015	0.0309908	0.253794	0.12211	0.902812	0.932084	118.095	149.607	137.148	121.668	111.436	167.643	140.82	89.5146	142.985	166.647	108.838	130.759	164.966	182.078	Nontarget	21.3751
Gcnt4	21.2239	-3.34971	0.561102	-5.96987	2.37447e-09	1.29807e-08	18.0342	11.014	15.9784	26.0717	11.5778	5.49649	16.531	28.9606	16.261	9.91944	11.1779	21.7932	49.3965	54.9219	Nontarget	6.8168
Slc4a5	52.4978	-2.71776	0.59595	-4.56038	5.10602e-06	1.89964e-05	32.5778	56.9058	33.2883	136.876	26.7737	29.3146	17.1433	52.6557	26.354	51.5811	24.1208	36.322	107.181	103.874	Nontarget	12.2657
Ccdc74a	7.64093	-0.349523	1.01793	-0.343366	0.731323	0.800493	7.56271	11.9319	5.32613	4.34528	5.06529	10.993	9.18389	15.7967	3.36435	7.93555	2.94156	0	11.1841	11.3426	Nontarget	6.55958
Fam129c	18.3379	-1.82708	0.724925	-2.52037	0.0117232	0.0245436	7.56271	17.4389	10.6523	6.51793	9.40698	20.1538	6.73485	42.1245	8.97159	24.7986	12.3545	46.0079	26.0962	17.9093	Nontarget	5.48637
Zfp712	26.9831	-0.212149	0.529704	-0.400504	0.688785	0.766281	29.6691	31.2064	21.3045	10.8632	18.0903	21.0699	24.4904	21.0623	28.5969	25.7905	31.1805	16.9503	50.3285	47.1612	Nontarget	10.0312
Mgll	49.3584	-0.926059	0.51986	-1.78136	0.0748532	0.12624	20.3611	65.1663	22.6361	32.5896	45.5876	72.3705	34.2865	63.1868	18.5039	79.3555	24.1208	29.0576	89.4728	94.3225	Nontarget	17.9663
Fgf8	6.75315	-1.78969	1.38526	-1.29195	0.196374	0.285223	5.81747	10.0962	3.9946	0	7.95975	0.916082	1.22452	2.63278	2.80362	4.95972	7.64805	14.5288	15.8441	16.1184	Nontarget	12.4945
Fam219b	70.3063	-1.69391	0.391529	-4.32639	1.51573e-05	5.31263e-05	62.2469	17.4389	75.8974	99.9415	99.135	24.7342	79.5937	142.17	89.7159	24.7986	81.7753	75.0655	56.8525	54.9219	Nontarget	12.0602
Fam122b	37.5995	-0.0804797	0.545782	-0.147458	0.882771	0.917441	26.7604	20.1924	65.2451	30.417	35.4571	30.2307	52.042	57.9212	41.4936	24.7986	37.0636	58.1153	25.1642	21.4912	Nontarget	3.84575
Trmt112	106.655	1.63309	0.348046	4.69216	2.70337e-06	1.04116e-05	100.642	172.553	98.5334	52.1434	81.7683	137.412	101.023	63.1868	95.8838	205.332	124.134	29.0576	110.909	120.589	Nontarget	91.2997
Armcx1	130.57	1.46588	0.299565	4.89336	9.9127e-07	4.02401e-06	160.562	122.072	118.506	117.323	178.009	143.825	162.249	89.5146	173.264	151.767	134.723	140.445	73.6287	62.0857	Nontarget	19.1845
Rad52	41.7725	-2.61973	1.45939	-1.79509	0.0726397	0.122996	11.6349	14.6854	26.6307	0	9.40698	36.6433	11.6329	15.7967	22.429	49.5972	31.7688	273.626	47.5324	33.4307	Nontarget	16.4596
Tnfaip3	23.3414	0.689198	0.646286	1.0664	0.286244	0.38771	17.4524	22.0281	18.6415	23.8991	31.839	15.5734	32.4497	23.695	16.261	35.71	27.0623	36.322	12.1161	13.7305	Nontarget	1.85308
Kif20a	478.643	1.86761	0.231268	8.0755	6.72014e-16	6.94106e-15	218.155	1145.46	238.344	121.668	223.597	1402.52	224.087	186.928	178.871	1363.92	227.677	152.553	448.296	568.92	Nontarget	92.1092
Rbm3	759.693	0.982059	0.287547	3.4153	0.000637126	0.00172949	931.959	564.469	928.078	523.607	1285.86	673.32	983.288	355.426	792.864	547.553	1201.92	610.21	606.738	630.408	Nontarget	436.987
Rfx3	238.117	-1.3048	0.195881	-6.66116	2.71673e-11	1.79947e-10	224.554	138.593	226.361	380.212	187.416	152.986	223.475	355.426	237.186	164.663	217.087	380.171	247.914	197.6	Nontarget	17.1292
AU022751	44.7783	0.730491	0.560026	1.30439	0.192101	0.280126	17.4524	102.798	11.9838	2.17264	10.1306	125.503	12.2452	18.4295	12.8967	115.065	13.5312	12.1073	69.9007	102.68	Nontarget	26.3861
Tbc1d25	91.2031	0.616088	0.453764	1.35773	0.17455	0.258339	57.593	142.265	73.2343	60.834	60.7835	161.23	54.4911	126.374	65.044	175.574	80.5987	29.0576	89.4728	100.292	Nontarget	23.4536
Slc38a1	100.901	-2.55217	0.502725	-5.07666	3.84121e-07	1.64158e-06	82.6081	53.2345	94.5388	245.509	69.4669	28.3985	108.37	202.724	38.69	32.7341	107.661	167.081	86.6768	94.9194	Nontarget	7.78155
Brcc3	128.054	2.1383	0.272464	7.84802	4.22644e-15	4.05847e-14	197.794	112.894	163.779	63.0066	178.009	110.846	216.74	81.6163	171.021	105.146	190.025	70.2226	68.9686	62.6826	Nontarget	36.4737
Spock1	8.97777	-0.975846	0.929135	-1.05027	0.293592	0.395493	6.39922	10.0962	6.65766	4.34528	2.17084	8.24474	4.89807	2.63278	5.04652	16.863	8.82468	16.9503	15.8441	16.7154	Nontarget	2.78433
Mthfsd	19.8871	-1.1647	0.671683	-1.734	0.0829188	0.137669	11.6349	18.3567	7.9892	28.2443	23.1556	17.4056	18.98	42.1245	21.3075	11.9033	19.4143	12.1073	26.0962	19.7003	Nontarget	7.8423
Dennd1b	324.733	-1.51856	0.26662	-5.69559	1.22943e-08	6.22091e-08	328.105	69.7555	292.937	793.014	366.872	79.6991	334.906	537.088	355.499	111.098	307.687	728.862	133.277	107.456	Nontarget	10.4135
Dynlt1f	169.582	-0.869796	0.506814	-1.71621	0.0861244	0.142201	102.969	206.513	119.838	132.531	49.2057	284.901	104.696	236.95	113.827	172.598	155.903	307.527	178.946	207.748	Nontarget	220.605
Dynlt1a	108.2	-5.0091	0.549585	-9.11432	7.91623e-20	1.12199e-18	87.8438	47.7275	46.6036	273.753	54.9946	21.986	33.6743	221.154	46.5401	13.8872	52.3597	188.875	245.118	180.287	Nontarget	28.417
Havcr1	28.3379	1.43935	0.577995	2.49025	0.0127654	0.0264793	19.1977	64.2485	11.9838	19.5538	12.3014	63.2097	21.4291	0	21.8682	62.4924	16.4727	14.5288	35.4163	34.0277	Nontarget	13.4625
Large2	165.073	-4.16705	0.381292	-10.9288	8.39825e-28	2.01144e-26	41.304	137.675	46.6036	228.127	30.3918	117.258	37.9601	126.374	37.5685	145.816	35.887	82.33	591.826	651.899	Nontarget	169.267
Bcas3	487.21	0.441101	0.168433	2.61885	0.00882255	0.0190466	185.577	1081.21	166.442	210.746	180.903	1248.62	162.249	200.092	177.75	1321.27	184.142	237.304	729.763	734.879	Nontarget	133.257
Zfp651	161.407	-0.0150247	0.372439	-0.0403413	0.967821	0.978598	183.25	71.5912	167.773	139.049	224.32	85.1956	219.801	321.2	194.011	103.162	215.91	164.66	82.0168	87.7557	Nontarget	7.41843
Zfp882	55.4387	-3.1615	0.411402	-7.68469	1.5337e-14	1.39187e-13	47.7033	14.6854	46.6036	117.323	54.9946	18.3216	58.1646	65.8196	58.876	13.8872	41.1818	70.2226	76.4247	91.9345	Nontarget	10.5916
Cdkl3	64.6614	-0.373753	0.652342	-0.572941	0.566684	0.663293	76.2089	39.4669	73.2343	86.9057	57.1655	94.3564	42.8582	28.9606	100.93	29.7583	54.1247	48.4294	92.2689	80.592	Nontarget	24.2767
Rtel1	109.452	-0.111068	1.76847	-0.0628045	0.949922	0.965106	55.266	191.828	0	0	74.5322	249.174	60.6137	31.5934	26.354	167.638	56.4779	79.9085	240.458	298.489	Nontarget	35.8103
Gemin5	746.483	1.72699	0.203568	8.4836	2.18337e-17	2.5645e-16	402.569	1428.15	423.427	208.574	451.535	1918.28	392.458	252.747	444.094	1985.87	375.931	230.04	941.329	995.759	Nontarget	92.8965
Cfap77	5.80789	-1.02521	1.36543	-0.750831	0.452754	0.55946	0.581747	7.34269	0	8.69057	3.61807	9.16082	3.0613	18.4295	2.80362	8.92749	7.05974	0	7.45607	4.17884	Nontarget	5.32714
Ift122	241.116	1.94965	0.213176	9.14572	5.92324e-20	8.46777e-19	190.813	400.176	230.355	115.15	203.335	460.789	188.576	97.413	210.272	507.875	210.616	104.123	229.274	226.851	Nontarget	33.6826
Rbm10	361.307	1.77055	0.212951	8.31435	9.22549e-17	1.02254e-15	360.683	564.469	340.872	165.121	397.264	516.67	339.192	255.38	446.897	513.827	380.049	227.618	285.195	265.058	Nontarget	49.5365
Asxl3	108.36	-2.05906	0.281885	-7.3046	2.78098e-13	2.24188e-12	55.8477	89.9479	74.5658	191.193	61.5071	108.098	51.4298	192.193	56.0724	128.953	61.1844	133.181	161.238	151.632	Nontarget	8.80981
Stx5a	214.433	0.38115	0.194848	1.95614	0.0504481	0.0896651	157.653	320.325	187.746	169.466	163.537	312.384	185.515	110.577	167.657	320.398	179.435	174.346	279.603	273.416	Nontarget	98.5951
Wipf3	1078.36	2.32865	0.186641	12.4766	1.00131e-35	3.92126e-34	1730.7	253.323	1728.33	1197.13	1709.9	259.251	1512.28	1442.77	1825.72	318.414	1625.51	1353.6	70.8327	69.2494	Nontarget	10.1131
Hps5	236.206	1.43874	0.21515	6.68714	2.2758e-11	1.51959e-10	248.406	278.104	243.67	165.121	249.647	297.727	225.924	194.826	287.091	366.027	250.033	169.503	169.626	161.184	Nontarget	22.3267
Zfp568	228.631	0.760421	0.221754	3.42913	0.000605522	0.0016513	216.992	234.048	215.708	165.121	235.898	314.216	213.678	218.521	224.85	329.325	235.325	198.56	185.47	213.121	Nontarget	18.1027
Garem2	133.705	1.13764	0.35046	3.24614	0.00116982	0.00302353	37.2318	371.724	37.2829	28.2443	36.1807	364.601	34.8988	63.1868	37.5685	411.657	54.1247	21.7932	181.742	191.63	Nontarget	28.2722
Ankrd50	180.663	0.66372	0.252882	2.62462	0.00867445	0.0187589	190.813	177.142	221.034	123.841	217.084	180.468	203.882	234.318	186.721	159.703	218.852	145.288	137.005	133.126	Nontarget	18.1373
Kmt5b	526.811	0.386751	0.203629	1.89929	0.0575259	0.100579	607.926	392.834	717.696	632.239	557.182	399.412	620.219	444.94	573.06	488.036	628.317	595.681	341.115	376.693	Nontarget	56.5353
Nrg2	26.6861	-0.0373039	0.589651	-0.0632644	0.949556	0.9649	19.1977	24.7816	25.2991	45.6255	31.1154	23.8181	14.082	44.7573	25.7933	28.7664	34.7104	19.3718	19.5722	16.7154	Nontarget	4.1173
Ppp1r3e	54.5274	0.202385	0.496914	0.407284	0.683799	0.762386	68.6462	12.8497	59.919	39.1076	81.0447	15.5734	95.5124	92.1474	85.7908	15.8711	81.7753	87.1729	13.0481	14.9244	Nontarget	5.34557
Atxn3	126.066	-0.446316	0.262439	-1.70065	0.0890091	0.146336	131.475	111.058	131.822	121.668	143.999	98.0208	142.656	60.554	125.042	99.1944	113.544	99.2802	191.994	194.615	Nontarget	49.9459
D830031N03Rik	546.246	0.576039	0.23239	2.47876	0.0131841	0.0272624	763.834	338.681	643.13	369.349	705.523	347.195	644.097	502.862	865.758	436.455	717.152	537.566	412.88	362.962	Nontarget	30.5485
A730017C20Rik	14.6317	-1.51744	1.93386	-0.784668	0.432649	0.539823	0	13.7675	17.3099	23.8991	21.7084	10.0769	5.51033	34.2262	18.5039	0	0	46.0079	10.2521	3.58187	Nontarget	2.82179
Zyg11a	104.752	-1.31615	0.312827	-4.20728	2.58467e-05	8.78714e-05	30.8326	188.156	27.9622	45.6255	27.4973	188.713	26.9394	60.554	21.3075	197.397	37.0636	36.322	281.467	296.698	Nontarget	84.3405
Galnt7	88.6307	-1.62391	0.513684	-3.1613	0.00157064	0.00395195	150.673	24.7816	99.8649	189.02	94.7934	33.895	90.0021	50.0229	114.388	27.7744	89.4234	118.652	74.5607	82.9799	Nontarget	12.6918
Sipa1l1	1358.17	0.815457	0.114379	7.12944	1.00777e-12	7.6961e-12	830.153	2704.86	818.893	990.725	798.869	2652.97	853.489	908.31	844.451	3088.91	800.104	878.993	1392.42	1451.25	Nontarget	112.795
Trmt2b	67.2246	-0.493235	0.440051	-1.12086	0.262348	0.361387	55.266	33.0421	85.2181	97.7689	101.306	30.2307	70.4098	150.069	72.3334	34.718	76.4805	67.8011	28.8923	37.6096	Nontarget	9.04681
Clec2g	52.4204	-1.62863	0.994035	-1.6384	0.101338	0.163306	66.9009	39.4669	26.6307	219.437	28.2209	4.58041	18.98	81.6163	52.1474	3.96777	47.0649	116.231	14.9121	13.7305	Nontarget	4.9905
Fam83h	22.135	0.370439	0.588	0.629998	0.528696	0.630619	22.6881	11.9319	22.6361	34.7623	18.0903	14.6573	23.8781	36.859	34.2042	16.863	23.5325	33.9006	9.32009	6.56675	Nontarget	1.04557
Foxred2	23.7294	-4.35939	0.799077	-5.45553	4.88267e-08	2.31405e-07	11.6349	14.6854	3.9946	67.3519	9.40698	18.3216	6.12259	36.859	10.6538	9.91944	6.47143	7.26441	68.0366	61.4887	Nontarget	8.01232
Zfp647	26.438	0.617218	0.569944	1.08294	0.278833	0.379603	21.5246	25.6994	33.2883	39.1076	20.9848	25.6503	28.1639	13.1639	35.3256	29.7583	37.0636	16.9503	19.5722	23.8791	Nontarget	6.14791
Nfatc4	31.153	0.0106483	0.583639	0.0182447	0.985444	0.990599	37.8136	12.8497	37.2829	23.8991	35.4571	10.993	39.7969	63.1868	34.7649	15.8711	36.4753	67.8011	13.9801	5.96978	Nontarget	1.52285
Ube2m	103.038	0.11453	0.355796	0.321899	0.747529	0.814275	127.984	38.5491	114.512	95.5963	129.527	70.5383	157.351	134.272	127.845	46.6214	161.786	128.338	47.5324	62.0857	Nontarget	29.0581
Ttc23	132.42	-0.375765	0.269178	-1.39597	0.162723	0.244269	144.855	59.6593	125.164	165.121	171.496	67.7901	162.861	210.623	178.31	66.4602	165.316	193.718	79.2207	63.2796	Nontarget	20.0648
Ncmap	8.99473	-2.76366	1.27156	-2.17343	0.0297479	0.0564035	4.65398	13.7675	6.65766	21.7264	5.78891	4.58041	0	2.63278	1.68217	7.93555	5.29481	4.84294	17.7082	28.6549	Nontarget	8.79384
Zfp57	15.0753	1.11381	0.658184	1.69224	0.0905998	0.148463	12.7984	18.3567	11.9838	6.51793	12.3014	21.986	15.9187	15.7967	12.3359	31.7422	11.7662	16.9503	13.0481	9.55164	Nontarget	4.05854
Zfp574	126.393	-0.0557401	0.304444	-0.183088	0.854729	0.898505	91.916	117.483	105.191	104.287	139.657	167.643	108.982	163.233	106.538	166.647	108.838	123.495	127.685	137.902	Nontarget	15.7323
Ctps2	118.146	2.3861	1.21086	1.97058	0.0487716	0.0871916	213.501	43.1383	175.762	117.323	222.873	53.1328	104.696	152.701	237.747	48.6052	47.0649	217.932	19.5722	0	Nontarget	1.24847
Tceal8	235.918	2.93942	0.387689	7.5819	3.40529e-14	2.97914e-13	364.755	54.1523	382.15	158.603	542.71	47.6363	496.542	100.046	449.701	37.6939	435.351	198.56	15.8441	19.1033	Nontarget	5.68602
Gnl3l	233.886	-0.509279	0.190923	-2.66746	0.00764273	0.0167356	313.562	105.551	304.921	254.199	316.943	103.517	292.048	215.888	348.77	94.2346	295.921	261.519	179.878	187.451	Nontarget	24.5737
Socs2	437.65	2.35282	0.305772	7.69468	1.41846e-14	1.29154e-13	699.26	70.6734	822.887	540.988	660.659	81.5313	806.958	602.907	562.406	80.3474	668.322	491.558	17.7082	20.8942	Nontarget	7.58886
Gtse1	124.26	0.910767	0.291905	3.12008	0.00180801	0.00450055	48.8668	279.022	47.9352	43.4528	49.2057	319.713	55.1033	60.554	49.3437	317.422	65.8909	38.7435	173.354	191.033	Nontarget	41.217
Mlf2	360.466	1.07014	0.179651	5.95678	2.57258e-09	1.40173e-08	489.249	208.349	476.689	308.515	518.107	237.265	544.911	334.363	499.045	215.252	487.71	431.022	150.985	145.066	Nontarget	66.6198
Slc35b3	31.3799	-3.06784	0.566813	-5.41243	6.21745e-08	2.90746e-07	24.4334	11.9319	26.6307	80.3878	28.2209	10.993	34.8988	39.4917	24.6719	6.94361	29.4156	26.6362	39.1444	55.5189	Nontarget	16.6096
Tada2b	278.696	0.821826	0.233214	3.52391	0.000425223	0.00119491	399.079	72.509	439.406	243.336	455.153	61.3775	460.419	342.262	438.486	73.4038	463.59	339.006	60.5806	53.131	Nontarget	9.52655
Tprkb	150.204	-0.748498	0.270861	-2.76341	0.00572016	0.0128842	126.239	163.375	143.806	191.193	163.537	118.175	121.84	165.865	134.574	127.961	127.664	145.288	211.566	161.781	Nontarget	59.5706
Aplf	387.232	0.807473	0.200034	4.03668	5.42118e-05	0.00017584	358.938	551.619	312.91	358.486	286.551	550.565	327.559	300.137	380.171	591.198	371.225	421.336	323.407	287.146	Nontarget	68.7931
Rnf144b	175.675	1.92373	0.444538	4.32747	1.50829e-05	5.28766e-05	264.113	22.9459	320.899	278.098	259.777	37.5594	248.577	131.639	342.603	46.6214	279.448	200.982	13.0481	13.1335	Nontarget	1.87222
Wdr59	297.479	0.850441	0.197707	4.30152	1.69632e-05	5.90674e-05	256.55	422.204	270.301	219.437	227.215	513.006	217.964	218.521	262.98	507.875	237.09	205.825	276.807	328.935	Nontarget	36.4726
Magi2	71.7703	-1.04799	0.520383	-2.01389	0.0440215	0.0795952	107.623	17.4389	107.854	139.049	95.517	10.0769	57.5524	97.413	112.706	5.95166	86.4818	130.759	21.4362	14.9244	Nontarget	1.86333
Lrrc36	5.64754	-1.11417	1.19939	-0.928953	0.352914	0.459667	4.65398	5.50702	10.6523	2.17264	2.89445	4.58041	1.22452	2.63278	2.80362	7.93555	2.35325	7.26441	13.0481	11.3426	Nontarget	3.74192
Rbm20	31.3165	-0.132476	0.547512	-0.24196	0.808811	0.862183	35.4866	22.0281	31.9568	17.3811	21.7084	22.902	47.144	31.5934	40.9329	21.8228	41.7701	48.4294	24.2322	31.0428	Nontarget	2.50272
Trim36	31.5237	-1.22578	0.666667	-1.83867	0.0659644	0.11306	29.6691	38.5491	19.973	65.1793	24.6029	41.2237	9.79615	39.4917	19.0646	27.7744	23.5325	12.1073	43.8044	46.5642	Nontarget	7.38332
Abat	408.958	0.977371	0.322554	3.0301	0.00244472	0.00593267	610.253	42.2204	625.82	577.923	589.021	50.3845	525.931	666.094	656.608	96.2185	554.778	670.747	30.7563	28.6549	Nontarget	4.26383
Ahcyl2	232.037	0.600368	0.202497	2.96483	0.00302854	0.00722635	258.877	244.144	234.35	184.675	262.672	218.944	219.189	252.747	279.801	246.994	260.622	225.197	183.606	176.705	Nontarget	21.6489
Senp8	122.846	0.900297	0.4136	2.17673	0.0295006	0.0559668	99.4788	138.593	130.49	141.222	138.934	137.412	142.044	39.4917	160.928	155.735	124.134	70.2226	121.161	119.992	Nontarget	24.5549
Depdc1a	64.1648	-0.21233	0.569162	-0.373058	0.709105	0.782967	43.631	67.9199	35.9514	41.2802	76.703	95.2725	67.3485	92.1474	27.4755	71.4199	69.4208	46.0079	80.1528	83.5769	Nontarget	19.653
Kdm4c	186.756	1.314	0.326996	4.01841	5.85926e-05	0.00018879	288.547	98.2084	250.328	180.329	285.827	113.594	223.475	94.7802	280.362	127.961	300.627	222.775	68.9686	78.801	Nontarget	11.8549
Traf7	316.836	0.636431	0.181123	3.5138	0.00044175	0.00123762	222.809	537.852	211.714	206.401	221.426	526.747	274.292	202.724	246.158	567.392	214.145	191.296	402.628	410.124	Nontarget	100.473
Aimp2	80.0556	0.943124	0.417548	2.25872	0.023901	0.0465075	40.1406	147.772	61.2505	13.0359	45.5876	159.398	51.4298	21.0623	35.3256	156.727	33.5338	31.4791	149.121	174.914	Nontarget	116.699
Rbm41	65.8091	-3.71982	0.404277	-9.20116	3.54099e-20	5.16036e-19	59.3382	16.521	61.2505	126.013	66.5724	6.41257	65.5117	102.679	51.5866	10.9114	80.5987	99.2802	92.2689	82.3829	Nontarget	11.8017
Wdr17	11.3265	-1.53567	1.106	-1.3885	0.164986	0.246949	4.65398	12.8497	5.32613	4.34528	13.7487	14.6573	5.51033	42.1245	4.48579	11.9033	5.29481	2.42147	20.5042	10.7456	Nontarget	2.72032
Sphk1	77.8293	0.899878	0.365609	2.46131	0.0138429	0.0284821	47.7033	158.786	58.5874	21.7264	41.9696	151.154	53.8788	50.0229	52.7081	123.993	57.6546	31.4791	136.073	103.874	Nontarget	43.4313
Sphk2	140.188	-0.292056	0.221311	-1.31966	0.186948	0.273965	141.365	103.715	145.137	195.538	131.698	97.1047	126.125	255.38	131.77	118.041	136.488	222.775	81.0848	76.4131	Nontarget	13.272
Speg	24.0173	-0.54241	0.726337	-0.746774	0.4552	0.56181	25.0151	6.42485	23.9676	17.3811	36.9043	5.49649	39.7969	50.0229	17.9432	12.8953	38.8286	41.165	10.2521	10.1486	Nontarget	1.32038
Cacna2d2	32.6197	-1.38586	0.588659	-2.35427	0.018559	0.037118	19.1977	33.9599	33.2883	73.8698	25.3265	23.8181	30.613	39.4917	29.1577	27.7744	11.7662	33.9006	42.8724	31.6398	Nontarget	4.10869
Camk2b	40.7552	1.07928	0.56591	1.90716	0.0565001	0.099016	15.1254	90.8657	27.9622	15.2085	29.6682	107.182	12.8574	15.7967	17.3825	100.186	12.9429	19.3718	62.4446	43.5794	Nontarget	7.93546
Map3k9	136.958	-0.437599	0.270391	-1.61839	0.105578	0.169036	66.3192	227.623	65.2451	67.3519	65.8488	227.188	77.7569	94.7802	84.6694	257.905	72.3623	130.759	226.478	253.118	Nontarget	19.3355
Rara	488.894	0.618191	0.255501	2.41953	0.0155407	0.0316366	496.812	320.325	589.869	525.779	487.715	328.873	611.035	900.412	624.086	372.971	591.842	627.161	172.422	195.212	Nontarget	32.3544
Aldoa	823.208	0.733567	0.187583	3.91062	9.20606e-05	0.000288143	968.027	804.942	1015.96	495.362	932.014	816.229	913.491	721.383	893.794	819.345	956.595	823.3	671.978	692.494	Nontarget	282.998
Orc4	95.6973	0.628759	1.26192	0.498254	0.618305	0.708557	38.9771	149.607	81.2235	8.69057	214.913	115.426	25.1026	15.7967	28.0362	161.687	54.1247	89.5944	179.878	176.705	Nontarget	54.6404
Ubr2	950.789	1.44736	0.2716	5.32902	9.87449e-08	4.50789e-07	951.157	1202.36	905.442	493.19	848.075	1714.91	697.363	847.756	870.805	1723.01	893.646	779.713	665.454	718.164	Nontarget	55.6679
4933403O08Rik	19.5526	0.664911	0.838693	0.792794	0.427898	0.535147	9.8897	22.9459	15.9784	8.69057	20.9848	46.7202	9.18389	0	12.8967	35.71	6.47143	14.5288	42.8724	26.864	Nontarget	19.5234
Zfp971	113.694	-3.06943	0.467277	-6.56875	5.07387e-11	3.26521e-10	118.676	21.1102	130.49	254.199	124.462	11.9091	155.514	202.724	132.331	10.9114	149.431	99.2802	109.045	71.6373	Nontarget	32.3038
Cebpzos	27.1367	-0.402299	0.551478	-0.729493	0.4657	0.571908	20.9429	27.5351	25.2991	32.5896	31.1154	23.8181	38.5723	10.5311	20.1861	19.8389	29.4156	26.6362	38.2124	35.2217	Nontarget	21.2128
Zfp967	86.9769	-2.59184	0.465564	-5.56711	2.59004e-08	1.25965e-07	98.897	18.3567	89.2127	156.43	117.225	11.9091	100.411	97.413	120.556	19.8389	123.545	48.4294	112.773	102.68	Nontarget	37.6051
Zfp966	86.9769	-2.59184	0.465564	-5.56711	2.59004e-08	1.25965e-07	98.897	18.3567	89.2127	156.43	117.225	11.9091	100.411	97.413	120.556	19.8389	123.545	48.4294	112.773	102.68	Nontarget	37.6051
Usp35	56.6719	0.277717	0.535443	0.518668	0.603993	0.696454	48.285	101.88	35.9514	41.2802	44.864	90.6921	31.8375	76.3507	53.8295	85.3072	27.0623	14.5288	69.9007	71.6373	Nontarget	10.9058
Eid2b	40.0912	0.439756	0.446386	0.985147	0.324552	0.429324	57.593	32.1243	42.609	34.7623	42.6932	25.6503	67.9608	39.4917	54.951	27.7744	42.9468	29.0576	32.6203	31.0428	Nontarget	10.0309
Plekhd1	24.0753	0.613642	0.638394	0.961229	0.336437	0.441758	20.9429	41.3026	15.9784	8.69057	29.6682	41.2237	16.531	13.1639	15.7003	36.7019	9.41299	19.3718	30.7563	37.6096	Nontarget	6.13789
Gm7102	80.0906	-3.82123	0.739544	-5.16701	2.37864e-07	1.03829e-06	77.9541	55.0702	42.609	167.293	58.6127	8.24474	41.0214	89.5146	63.3618	9.91944	55.3013	188.875	135.141	128.35	Nontarget	55.5754
EU599041	18.076	-1.86628	0.94212	-1.98093	0.0475987	0.0853162	8.14446	9.17836	5.32613	21.7264	12.3014	11.9091	18.98	0	11.7752	13.8872	11.7662	0	68.9686	59.1008	Nontarget	45.257
Zfp964	16.4556	-0.827799	0.714108	-1.15921	0.246372	0.343416	8.14446	23.8637	10.6523	13.0359	13.7487	21.986	13.4697	7.89835	14.0181	8.92749	8.82468	7.26441	39.1444	39.4005	Nontarget	18.9262
0610010B08Rik	83.4294	-2.49084	2.57015	-0.969144	0.332474	0.437771	181.505	25.6994	0	0	107.818	26.5664	33.6743	15.7967	91.3981	0	152.961	118.652	302.903	111.038	Nontarget	34.3816
Hist1h2ao	256.671	-2.01007	3.86078	-0.520637	0.602619	0.695186	0	28.4529	290.274	0	0	168.559	172.045	0	0.560724	476.133	261.799	355.956	876.088	963.522	Nontarget	2563.78
Zfp600	118.587	2.84425	0.547635	5.1937	2.06157e-07	9.06585e-07	101.224	182.649	85.2181	39.1076	118.673	258.335	140.207	0	135.135	206.324	107.661	46.0079	151.917	87.7557	Nontarget	23.563
Trim61	23.3203	0.780893	0.670778	1.16416	0.244359	0.341273	9.8897	34.8778	10.6523	10.8632	15.1959	47.6363	10.4084	36.859	15.1396	68.4441	15.8844	9.68588	24.2322	16.7154	Nontarget	6.70161
Gng12	602.312	0.307799	0.190498	1.61576	0.106147	0.169814	734.747	220.281	860.17	660.483	874.849	221.692	948.39	816.163	779.967	245.01	840.109	828.142	182.674	219.688	Nontarget	33.0721
Zfp970	295.225	-3.12187	0.261491	-11.9387	7.43573e-33	2.43332e-31	303.672	78.016	267.638	556.196	312.601	45.8041	266.945	576.58	342.042	48.6052	324.16	423.757	304.767	282.37	Nontarget	44.517
Slc25a13	46.4016	0.787919	0.545653	1.44399	0.148741	0.226825	35.4866	62.4128	53.2613	65.1793	46.3113	69.6222	37.3478	15.7967	28.5969	69.4361	51.7714	19.3718	48.4645	46.5642	Nontarget	10.8068
Gm10471	43.178	-4.8639	1.1222	-4.33427	1.46246e-05	5.13679e-05	47.7033	8.26052	11.9838	23.8991	8.68336	6.41257	14.082	231.685	42.0543	9.91944	35.2987	29.0576	74.5607	60.8917	Nontarget	14.2026
0610010K14Rik	117.31	-1.35333	0.45857	-2.9512	0.0031654	0.00751925	23.2699	203.76	41.2775	95.5963	60.0599	204.286	67.3485	60.554	47.6616	161.687	51.1831	125.916	237.662	262.073	Nontarget	278.3
Ube2i	255.28	0.164532	0.224977	0.731328	0.464579	0.570777	183.25	383.655	193.072	228.127	191.034	328.873	250.414	181.662	209.15	333.293	244.149	215.511	307.563	324.159	Nontarget	64.1061
Etl4	508761	2.42732	0.365979	6.63239	3.303e-11	2.16694e-10	3147.83	60774.5	2822.85	1.57869e+06	2664.34	48455.2	2609.45	2.66259e+06	3440.04	61283.3	2436.79	2.69372e+06	12.1161	13.7305	Nontarget	1.16012
Fnbp1	191.601	0.844609	0.267296	3.15983	0.00157863	0.00396904	175.688	237.719	147.8	141.222	226.491	243.678	202.658	223.787	199.057	245.01	164.139	210.668	137.937	126.559	Nontarget	22.3445
Mrpl15	110.51	-0.142184	0.395357	-0.359635	0.71912	0.790908	54.6842	182.649	57.2559	60.834	70.1905	226.272	61.2259	21.0623	57.1939	172.598	63.5377	104.123	205.974	209.539	Nontarget	35.1653
Gm2897	7.50549	2.71113	1.39836	1.93879	0.0525265	0.0928796	7.56271	3.67134	13.3153	0	6.51252	23.8181	6.73485	2.63278	9.53231	10.9114	3.52987	4.84294	1.86402	10.1486	Nontarget	2.25426
Gm10767	24.8461	0.167891	0.661349	0.253862	0.799602	0.854676	23.8516	21.1102	23.9676	21.7264	23.8792	13.7412	44.6949	21.0623	21.8682	21.8228	41.7701	7.26441	35.4163	25.67	Nontarget	16.642
Tnfaip8	45.0813	-0.825668	0.677589	-1.21854	0.22302	0.316798	47.1215	29.3707	49.2667	15.2085	38.3515	21.0699	56.3279	118.475	41.4936	17.855	54.713	89.5944	24.2322	28.0579	Nontarget	5.61726
Rex2	90.188	-1.21981	1.36357	-0.894572	0.371016	0.478008	38.3953	154.196	54.5928	54.3161	67.2961	160.314	20.2046	150.069	12.3359	112.09	48.2416	0	171.49	219.091	Nontarget	40.0845
Clcc1	73.2652	-3.82855	0.563456	-6.79477	1.08489e-11	7.48285e-11	65.7374	36.7134	57.2559	197.71	46.3113	25.6503	45.3072	68.4524	38.1292	19.8389	29.4156	84.7514	167.762	142.678	Nontarget	48.2018
Dlg3	72.6554	1.84891	0.369495	5.00388	5.61873e-07	2.35314e-06	89.0073	48.6453	101.196	34.7623	106.371	66.874	104.084	36.859	111.584	63.4844	106.484	79.9085	34.4843	33.4307	Nontarget	6.81782
Afap1l2	130.949	1.95299	0.239023	8.1707	3.06595e-16	3.25629e-15	158.817	168.882	137.148	67.3519	151.235	185.965	154.289	92.1474	139.06	171.606	154.726	84.7514	80.1528	87.1587	Nontarget	12.624
Taf6l	95.9924	0.524792	0.349236	1.50269	0.132919	0.206275	59.92	162.457	50.5982	39.1076	48.4821	179.552	45.9194	50.0229	72.3334	225.171	59.4195	70.2226	139.801	140.887	Nontarget	38.203
Rapgef3	31.1259	-1.38237	0.584799	-2.36383	0.0180869	0.0362748	24.4334	23.8637	25.2991	23.8991	16.6431	31.1468	20.2046	18.4295	31.4006	28.7664	27.0623	72.6441	46.6004	45.3703	Nontarget	7.19615
Wbp1l	227.105	-1.69974	0.347211	-4.89543	9.80933e-07	3.98596e-06	211.756	103.715	248.997	482.327	180.18	87.0278	240.006	600.275	173.825	96.2185	198.849	268.783	138.869	148.647	Nontarget	25.0354
Smox	97.561	1.43503	0.320994	4.47058	7.80073e-06	2.84141e-05	152.999	56.9058	126.496	86.9057	136.039	45.8041	134.697	126.374	155.321	44.6375	139.43	113.809	19.5722	26.864	Nontarget	9.61979
Frmd4a	509.841	2.51877	0.245072	10.2777	8.88409e-25	1.77103e-23	845.86	118.401	860.17	532.297	767.03	123.671	802.06	737.179	792.864	156.727	769.512	571.467	28.8923	31.6398	Nontarget	3.02147
Tirap	79.5091	-2.724	0.340392	-8.00253	1.21887e-15	1.22153e-14	74.4636	43.1383	53.2613	134.704	55.7182	36.6433	50.8175	121.108	53.8295	35.71	57.0662	205.825	94.1329	96.7104	Nontarget	13.6155
Asph	135.484	-2.69369	0.344326	-7.82309	5.15426e-15	4.89537e-14	133.802	59.6593	111.849	371.522	104.2	43.0558	97.9615	234.318	112.706	51.5811	86.4818	232.461	149.121	108.053	Nontarget	26.3801
Filip1l	185.833	0.407491	0.324572	1.25547	0.209308	0.30068	296.109	24.7816	263.643	178.157	294.511	39.3915	371.029	242.216	254.569	41.6616	307.687	213.089	35.4163	39.4005	Nontarget	7.35015
Phka2	223.79	0.230068	0.299743	0.76755	0.442754	0.549693	112.277	370.806	153.126	102.114	102.753	465.37	112.043	207.99	136.817	486.052	125.899	152.553	310.359	294.907	Nontarget	47.0971
Skap1	7.88691	0.154069	1.14315	0.134776	0.892789	0.925112	2.90874	11.9319	2.66307	15.2085	6.51252	10.0769	4.89807	0	11.2145	13.8872	7.05974	0	12.1161	11.9396	Nontarget	3.83665
Zfp513	93.7225	-0.07657	0.293963	-0.260475	0.794497	0.851041	91.916	86.2766	115.843	49.9708	102.03	80.6152	99.7983	107.944	101.491	77.3716	94.7182	104.123	99.7249	100.292	Nontarget	28.4427
Eda	10.3418	-2.96817	0.746226	-3.97758	6.96194e-05	0.000221597	5.81747	7.34269	7.9892	15.2085	3.61807	7.32866	5.51033	10.5311	5.04652	5.95166	7.64805	9.68588	29.8243	23.2821	Nontarget	3.30358
Aamdc	57.1932	1.73865	0.384124	4.52628	6.00319e-06	2.21399e-05	70.9731	49.5631	77.2289	23.8991	84.6628	50.3845	89.3899	28.9606	74.0156	41.6616	93.5416	43.5864	38.2124	34.6247	Nontarget	43.1495
Dcdc2c	97.3467	-6.1072	0.791432	-7.71665	1.19424e-14	1.09523e-13	36.6501	40.3848	46.6036	241.163	18.814	6.41257	19.5923	331.731	33.6435	4.95972	51.7714	220.354	168.694	142.081	Nontarget	77.9037
Irak1	458.728	-2.86902	0.270903	-10.5906	3.29468e-26	7.2021e-25	360.101	83.5231	315.573	1229.72	337.204	64.1257	364.907	913.576	365.031	73.4038	397.699	1610.28	150.053	157.005	Nontarget	24.6223
Acsm2	45.8259	-3.59825	0.796513	-4.51751	6.25713e-06	2.30045e-05	36.0683	16.521	38.6144	110.805	31.839	7.32866	16.531	76.3507	49.3437	0	51.1831	140.445	37.2803	29.2519	Nontarget	3.41811
Pde4b	94.1709	1.9814	0.432072	4.58581	4.5224e-06	1.69395e-05	174.524	32.1243	161.115	117.323	125.909	31.1468	166.535	65.8196	123.359	37.6939	142.371	113.809	17.7082	8.95466	Nontarget	2.54918
Sfxn3	236.573	-0.120577	0.36731	-0.32827	0.742708	0.810378	322.87	52.3166	207.719	462.773	327.797	29.3146	297.558	452.839	343.724	22.8147	318.865	421.336	27.0283	25.0731	Nontarget	6.01983
Mitf	42.4656	0.556488	0.466363	1.19325	0.232771	0.327971	55.266	28.4529	43.9406	52.1434	52.1002	21.986	58.1646	31.5934	63.3618	18.8469	72.9507	58.1153	14.9121	22.6851	Nontarget	2.78776
Rhox13	47.3814	3.03709	0.526633	5.767	8.06974e-09	4.17665e-08	31.4143	116.565	38.6144	13.0359	37.6279	110.846	30.0007	2.63278	37.0078	120.025	22.9442	14.5288	39.1444	48.9522	Nontarget	31.0637
Vegfb	83.0326	1.65307	0.545234	3.03185	0.00243061	0.00590103	76.2089	23.8637	114.512	95.5963	101.306	21.0699	152.453	139.538	111.584	23.8066	121.192	169.503	4.66004	7.16373	Nontarget	3.72011
Psrc1	8.5989	-0.771066	1.20898	-0.637783	0.523615	0.625643	6.98097	1.83567	7.9892	17.3811	12.3014	11.9091	9.79615	15.7967	4.48579	1.98389	14.7078	0	7.45607	7.76071	Nontarget	3.07015
Nup35	51.8425	-0.172872	0.479572	-0.360472	0.718494	0.790411	32.5778	75.2625	26.6307	17.3811	27.4973	79.6991	46.5317	18.4295	23.5504	91.2588	30.5922	48.4294	111.841	96.1134	Nontarget	30.3118
Gm14326	118.984	-1.97377	0.446854	-4.41704	1.00062e-05	3.59562e-05	133.22	24.7816	134.485	210.746	168.602	12.8251	151.84	263.278	162.049	11.9033	179.435	108.966	47.5324	56.1159	Nontarget	17.0851
Chchd7	70.7722	1.7561	0.46188	3.80206	0.000143498	0.000436409	86.6803	69.7555	77.2289	34.7623	82.4919	111.762	113.88	15.7967	87.473	53.565	84.7169	48.4294	63.3766	60.8917	Nontarget	165.829
Tmem132b	13.2248	-2.42981	0.714762	-3.39946	0.000675192	0.00182584	8.14446	11.9319	11.9838	19.5538	6.51252	11.9091	5.51033	34.2262	8.41086	8.92749	2.94156	21.7932	19.5722	13.7305	Nontarget	1.32865
Kcng2	67.2731	-1.60048	0.590618	-2.70984	0.00673158	0.0149431	50.0303	20.1924	81.2235	282.443	39.7987	11.9091	39.1846	126.374	52.1474	10.9114	59.4195	142.867	13.9801	11.3426	Nontarget	2.97354
Magt1	139.962	-3.80694	0.360028	-10.574	3.93338e-26	8.58692e-25	161.726	30.2886	118.506	351.968	124.462	17.4056	91.8389	226.419	123.359	26.7825	124.134	251.833	160.306	150.438	Nontarget	24.9911
Gne	115.789	1.19862	0.311051	3.85345	0.000116466	0.000358821	136.129	118.401	138.479	106.459	128.803	135.58	117.554	57.9212	126.163	141.848	121.781	154.974	67.1046	69.8464	Nontarget	7.74656
Fau	1304.92	-0.206983	0.275458	-0.751413	0.452404	0.559152	1342.67	779.243	1450.04	1798.95	1843.77	720.04	1916.98	1021.52	1656.38	623.933	1617.27	1738.61	840.672	918.748	Nontarget	1563.28
Abhd11	42.0731	4.53108	0.847477	5.34655	8.96471e-08	4.12102e-07	39.5588	57.8237	51.9298	0	54.271	75.1187	39.7969	5.26557	32.522	98.2024	40.0052	4.84294	56.8525	32.8338	Nontarget	32.8657
Faap20	11.1852	2.56776	1.4291	1.79676	0.0723734	0.122604	11.0532	9.17836	13.3153	0	7.23613	1.83216	19.5923	0	14.0181	8.92749	8.82468	0	36.3483	26.267	Nontarget	24.6271
Ddah2	183.346	1.53424	0.263043	5.83266	5.45504e-09	2.8701e-08	206.52	188.156	223.697	141.222	255.436	138.328	285.313	173.764	248.401	160.695	237.678	118.652	92.2689	96.7104	Nontarget	50.1895
Dcn	199.689	0.0636943	0.722421	0.0881677	0.929743	0.950918	182.087	45.8918	258.317	321.551	189.587	10.0769	166.535	621.337	184.478	5.95166	163.551	632.003	6.52406	7.76071	Nontarget	2.77093
Hilpda	16.6384	-1.96039	1.06356	-1.84324	0.0652937	0.112181	6.39922	20.1924	7.9892	15.2085	15.9195	19.2377	11.0207	0	1.12145	9.91944	5.29481	12.1073	57.7845	50.7431	Nontarget	45.1712
Pcsk5	90.8459	-1.80834	0.521731	-3.46603	0.000528201	0.00145922	133.22	22.9459	99.8649	204.228	91.1753	9.16082	74.6956	268.544	58.3153	16.863	67.6559	179.189	23.3002	22.6851	Nontarget	1.93866
Dmpk	32.3308	-0.317154	1.198	-0.264735	0.791213	0.848348	34.9048	12.8497	45.2721	4.34528	55.7182	6.41257	37.3478	115.842	28.0362	0	38.2403	62.9582	6.52406	4.17884	Nontarget	1.12057
Dlk1	57.462	-3.19831	2.52661	-1.26585	0.205567	0.296259	40.1406	27.5351	0	252.027	4.34168	43.9719	16.531	68.4524	0	2.97583	0	326.898	10.2521	11.3426	Nontarget	1.68189
Kat2b	259.211	0.314431	0.219596	1.43186	0.152183	0.231177	365.337	100.962	387.476	256.372	377.726	75.1187	383.274	226.419	389.703	95.2266	449.47	305.105	108.113	108.65	Nontarget	17.9742
Axl	474.532	-1.07685	0.48269	-2.23094	0.0256851	0.0495936	730.674	96.3728	660.44	1470.88	382.068	43.9719	360.621	1058.38	468.765	47.6133	422.996	779.713	62.4446	58.5038	Nontarget	7.44768
Kif17	62.0005	0.440295	0.393841	1.11795	0.263588	0.362521	28.5056	132.168	31.9568	26.0717	30.3918	110.846	33.062	63.1868	35.3256	160.695	28.8273	33.9006	67.1046	85.9648	Nontarget	12.838
Lancl1	263.068	1.10547	0.186554	5.92573	3.10918e-09	1.68136e-08	166.38	500.221	163.779	128.186	164.984	558.81	183.678	107.944	168.217	537.633	190.025	152.553	334.591	325.95	Nontarget	49.186
Lins1	36.6878	1.54735	2.17707	0.710751	0.477239	0.582275	52.939	55.988	21.3045	0	55.7182	52.2167	0	0	43.7365	78.3635	14.7078	41.165	50.3285	47.1612	Nontarget	5.88078
Dync1i1	175.831	1.20654	0.410241	2.94106	0.00327095	0.00775327	297.855	11.9319	271.633	223.782	293.787	17.4056	252.251	226.419	348.77	29.7583	248.856	217.932	9.32009	11.9396	Nontarget	2.60892
Meis1	132.908	0.530084	0.583274	0.908806	0.363452	0.470427	203.611	25.6994	194.404	130.359	190.31	14.6573	150.004	397.55	175.507	20.8308	202.968	130.759	12.1161	11.9396	Nontarget	2.60908
Cldn12	121.058	-2.50858	0.308028	-8.144	3.82423e-16	4.02543e-15	78.5359	88.1122	101.196	223.782	83.9392	85.1956	66.7363	126.374	63.9226	92.2508	73.539	147.71	219.954	243.567	Nontarget	44.1222
Phactr2	957.685	1.95156	0.293559	6.64792	2.97254e-11	1.96104e-10	1535.81	154.196	1282.27	873.402	1614.38	125.503	1629.22	1353.25	1811.14	203.348	1473.72	1239.79	51.2605	60.2947	Nontarget	4.38534
Fsd1l	133.654	-0.970196	0.267977	-3.62044	0.000294101	0.000853285	93.6613	151.443	75.8974	130.359	68.7433	180.468	83.8795	89.5146	84.6694	182.518	89.4234	72.6441	279.603	288.34	Nontarget	43.9622
Kifc1	95.1149	1.5116	0.437902	3.45191	0.000556633	0.00153086	59.3382	167.046	71.9028	73.8698	72.3613	185.049	79.5937	31.5934	51.0259	194.421	114.132	62.9582	82.9488	85.3678	Nontarget	22.2253
Cngb1	59.8152	-0.874627	0.506989	-1.72514	0.0845026	0.139859	84.3533	18.3567	78.5604	139.049	63.678	12.8251	40.4091	126.374	76.2585	11.9033	55.3013	101.702	14.9121	13.7305	Nontarget	1.95465
Hist1h4m	74.0851	-2.39559	1.0674	-2.24432	0.024812	0.0480595	5.81747	242.309	13.3153	95.5963	10.1306	132.832	33.6743	68.4524	10.093	96.2185	0	58.1153	111.841	158.796	Nontarget	1029.96
Epg5	245.474	-1.20465	0.212721	-5.66307	1.48686e-08	7.45957e-08	250.151	149.607	250.328	256.372	244.581	178.636	208.78	226.419	280.362	166.647	220.029	263.94	401.696	339.083	Nontarget	18.4322
Nuggc	8.1607	0.816315	1.00766	0.810108	0.417878	0.525215	8.14446	7.34269	9.32073	6.51793	9.40698	8.24474	10.4084	0	4.48579	9.91944	12.9429	4.84294	14.9121	7.76071	Nontarget	2.83858
Rgs22	109.669	0.490084	0.363289	1.34902	0.177331	0.261962	193.14	21.1102	165.11	141.222	165.707	24.7342	140.207	152.701	179.432	15.8711	178.847	121.073	17.7082	18.5063	Nontarget	3.17548
Rcc1	155.944	1.95289	0.280138	6.97117	3.14315e-12	2.28124e-11	86.0986	368.97	81.2235	41.2802	84.6628	385.67	101.635	52.6557	94.7624	332.301	94.7182	24.2147	208.77	226.254	Nontarget	58.3234
Usp40	263	0.564479	0.27164	2.07804	0.0377055	0.0693899	223.973	312.064	214.377	162.948	237.345	397.58	236.332	318.567	235.504	359.084	255.916	278.469	251.642	198.197	Nontarget	27.5739
Postn	36.1121	-1.40446	0.815246	-1.72275	0.0849339	0.140446	38.3953	13.7675	6.65766	47.7981	27.4973	17.4056	18.98	113.21	12.3359	12.8953	29.4156	150.131	9.32009	7.76071	Nontarget	1.81764
Ccpg1os	40.7386	1.04946	0.540957	1.94	0.0523796	0.0926595	21.5246	66.0842	47.9352	17.3811	27.4973	76.0348	41.0214	7.89835	29.1577	51.5811	33.5338	21.7932	59.6486	69.2494	Nontarget	106.131
Frem1	30.0214	-2.9202	0.696625	-4.19192	2.76602e-05	9.36322e-05	19.7794	10.0962	26.6307	65.1793	36.9043	4.58041	28.1639	26.3278	21.3075	6.94361	22.9442	108.966	25.1642	17.3123	Nontarget	1.35169
App	827.689	-0.99643	0.510111	-1.95336	0.0507772	0.0901626	1695.79	171.635	1366.15	1933.65	722.166	81.5313	607.361	1463.83	1002.57	85.3072	768.923	1399.61	141.665	147.453	Nontarget	31.3409
Bcar1	364.302	1.23704	0.204281	6.05557	1.39924e-09	7.79896e-09	445.618	347.86	533.945	375.867	432.721	257.419	437.153	452.839	440.169	283.696	419.466	394.699	144.461	134.32	Nontarget	26.8202
Dync1i2	395.13	2.02279	0.258353	7.82957	4.89544e-15	4.66294e-14	503.211	347.86	520.629	301.997	574.549	463.537	566.952	147.436	475.494	409.673	528.892	225.197	224.614	241.776	Nontarget	72.5149
Gm7694	75.4381	1.22711	0.369071	3.32486	0.000884635	0.00234061	51.7755	160.621	53.2613	67.3519	35.4571	165.811	53.8788	31.5934	46.5401	176.566	34.1221	43.5864	69.9007	65.6675	Nontarget	10.3155
Syk	45.9217	0.848016	0.48941	1.73273	0.0831436	0.137967	55.266	22.9459	57.2559	78.2151	74.5322	25.6503	60.0014	65.8196	37.5685	23.8066	54.1247	65.3797	13.9801	8.35769	Nontarget	1.28472
Gm15097	79.5819	7.55497	1.33848	5.64444	1.65722e-08	8.25943e-08	63.9922	89.9479	49.2667	0	28.2209	320.629	42.8582	0	72.8942	146.808	61.1844	0	133.277	105.068	Nontarget	44.1764
Golga5	435.75	2.51625	0.176607	14.2478	4.62951e-46	3.18781e-44	528.226	577.319	468.699	243.336	499.293	665.075	500.828	160.6	518.67	699.32	478.886	222.775	271.215	266.252	Nontarget	62.3423
Dcaf11	112.606	-0.639056	0.490847	-1.30195	0.192935	0.281068	20.9429	223.034	50.5982	147.74	61.5071	240.013	45.3072	65.8196	38.1292	223.187	45.3	181.61	110.909	122.38	Nontarget	27.81
Pla2g6	168.24	-0.24217	0.280739	-0.862615	0.388349	0.49597	64.5739	310.229	115.843	152.085	94.7934	296.811	83.2673	179.029	68.4084	338.253	95.8948	179.189	190.13	186.854	Nontarget	31.5007
Zfp942	161.519	0.522198	0.296874	1.75899	0.07858	0.131558	147.182	145.936	177.094	93.4236	167.155	195.125	189.188	78.9835	169.339	183.51	179.435	169.503	176.15	189.242	Nontarget	44.5896
Lpin3	80.9803	1.4303	0.413714	3.45722	0.000545783	0.00150302	57.0112	130.333	55.9244	34.7623	58.6127	148.405	44.6949	52.6557	71.7727	199.381	61.1844	14.5288	98.7929	105.665	Nontarget	17.5716
Gpsm1	144.996	1.20608	0.255437	4.72162	2.33969e-06	9.07645e-06	200.703	109.222	210.382	136.876	180.903	107.182	181.841	110.577	204.664	123.993	166.492	162.238	59.6486	75.2192	Nontarget	11.114
Sncaip	45.6281	-0.89572	0.773858	-1.15747	0.247079	0.344169	30.8326	20.1924	43.9406	43.4528	57.1655	23.8181	47.7562	200.092	30.2791	17.855	48.8299	38.7435	23.3002	12.5365	Nontarget	3.26489
Kat5	161.871	1.08087	0.258528	4.18087	2.9039e-05	9.79984e-05	146.019	236.802	114.512	119.495	157.748	272.992	166.535	81.6163	131.209	251.954	144.136	123.495	175.218	144.469	Nontarget	53.5033
Slc43a2	191.835	-4.4166	0.459023	-9.62175	6.47237e-22	1.06642e-20	149.509	65.1663	109.186	577.923	94.0698	31.1468	66.7363	334.363	130.649	68.4441	105.896	339.006	301.971	311.622	Nontarget	24.9702
Atxn1	122.741	0.0348146	0.376833	0.0923872	0.92639	0.948898	141.365	43.1383	149.132	128.186	154.853	45.8041	135.309	310.668	155.881	46.6214	137.077	210.668	29.8243	29.8489	Nontarget	1.84908
Gm14440	85.0376	-1.57589	0.456789	-3.44994	0.000560718	0.00154106	102.387	11.9319	123.833	80.3878	138.21	12.8251	125.513	50.0229	122.799	16.863	171.199	79.9085	99.7249	54.9219	Nontarget	18.0532
Lig1	663.419	2.49044	0.214196	11.6269	3.00713e-31	9.06858e-30	518.337	1090.39	517.966	197.71	604.941	1539.02	558.38	260.646	545.024	1441.29	620.669	263.94	549.885	579.665	Nontarget	111.335
AI987944	58.9337	-0.425089	0.632301	-0.672288	0.5014	0.605114	62.2469	20.1924	66.5766	110.805	84.6628	36.6433	99.186	63.1868	89.1552	19.8389	71.1857	16.9503	37.2803	47.1612	Nontarget	11.8683
Apoo	62.3586	0.752953	0.337277	2.23245	0.0255852	0.0494065	62.2469	82.6052	59.919	41.2802	60.0599	87.0278	52.6543	23.695	52.1474	83.3233	67.0675	58.1153	73.6287	69.2494	Nontarget	63.7226
Cd99l2	155.246	0.053676	0.32779	0.163751	0.869927	0.908807	251.896	37.6313	274.296	202.056	238.792	42.1398	251.639	144.803	257.372	17.855	219.44	140.445	41.9404	53.131	Nontarget	8.70795
Pnck	8.61071	0.177422	1.02481	0.173127	0.862551	0.903271	5.23572	10.0962	9.32073	4.34528	7.23613	11.9091	5.51033	26.3278	9.53231	12.8953	4.11818	0	7.45607	6.56675	Nontarget	3.04721
Tmem164	260.292	-2.10955	0.248785	-8.4794	2.2636e-17	2.65263e-16	228.045	90.8657	214.377	454.082	217.084	89.776	216.128	766.14	240.551	78.3635	220.029	544.831	143.529	140.29	Nontarget	16.6918
4931406C07Rik	130	2.27417	0.275426	8.25692	1.49476e-16	1.6209e-15	185.577	129.415	173.099	60.834	203.335	149.321	165.922	60.554	186.16	126.969	154.138	67.8011	72.6967	84.1738	Nontarget	19.3214
Fkbp8	177.632	-0.48854	0.294231	-1.6604	0.0968346	0.15723	143.11	172.553	169.105	136.876	148.341	193.293	202.658	229.052	134.013	156.727	171.199	232.461	202.246	195.212	Nontarget	74.0497
Vps37d	28.4832	1.14997	0.557228	2.06373	0.0390434	0.0715176	26.7604	44.0561	30.6252	32.5896	23.1556	31.1468	35.511	44.7573	33.6435	30.7503	24.1208	9.68588	15.8441	16.1184	Nontarget	6.67919
Adgrb2	25.3412	-2.44015	0.584637	-4.17379	2.99573e-05	0.00010085	15.1254	29.3707	7.9892	21.7264	11.5778	27.4825	18.3678	39.4917	5.60724	22.8147	11.1779	26.6362	55.9205	61.4887	Nontarget	6.81307
Daxx	325.106	1.87425	0.221583	8.45845	2.70954e-17	3.1423e-16	484.595	285.447	403.454	297.652	512.318	254.671	448.786	247.482	479.98	241.042	425.938	208.246	147.257	114.62	Nontarget	31.7626
Topaz1	348.511	2.09946	0.334586	6.27481	3.50064e-10	2.07427e-09	161.144	744.365	186.415	156.43	183.074	1062.66	146.33	60.554	205.225	940.363	190.613	79.9085	404.492	357.59	Nontarget	54.3189
Zfp839	219.477	0.261784	0.249306	1.05005	0.293695	0.395599	218.155	258.83	159.784	219.437	194.652	227.188	191.025	310.668	235.504	276.752	181.2	290.576	166.83	142.081	Nontarget	28.9551
Ift43	61.9676	1.587	0.448863	3.53559	0.000406859	0.00114701	47.1215	99.1263	62.582	10.8632	68.7433	100.769	56.3279	7.89835	57.1939	72.4119	61.1844	38.7435	86.6768	97.9043	Nontarget	116.171
Tmppe	106.507	-4.36212	0.381953	-11.4206	3.30074e-30	9.37252e-29	86.0986	44.974	67.9082	204.228	58.6127	17.4056	63.675	226.419	75.137	22.8147	55.3013	174.346	194.79	199.39	Nontarget	17.48
1700013H16Rik	57.8188	3.72466	0.514185	7.24383	4.36203e-13	3.45906e-12	46.5398	138.593	39.946	19.5538	40.5224	150.237	53.8788	0	45.4187	125.977	41.7701	7.26441	54.9885	44.7733	Nontarget	37.1627
Zfp963	21.3249	-1.35184	0.635411	-2.12751	0.0333777	0.0624123	8.72621	22.0281	17.3099	28.2443	9.40698	23.8181	13.4697	10.5311	19.6253	21.8228	20.0026	33.9006	41.0084	28.6549	Nontarget	11.6746
2410004P03Rik	5.12122	-0.678748	1.10107	-0.616445	0.537601	0.638384	3.49048	5.50702	3.9946	8.69057	5.78891	4.58041	3.0613	2.63278	5.60724	7.93555	1.76494	2.42147	10.2521	5.96978	Nontarget	2.81195
Tmem200b	71.5551	-1.10579	0.461628	-2.39542	0.0166015	0.0335851	59.3382	17.4389	67.9082	230.3	53.5474	15.5734	58.7769	215.888	65.6047	12.8953	60.0078	123.495	10.2521	10.7456	Nontarget	5.54723
Ccdc136	384.66	1.84415	0.177411	10.3948	2.61772e-25	5.36066e-24	268.185	808.613	275.627	152.085	252.541	752.103	274.292	179.029	289.334	923.5	278.86	159.817	371.871	399.378	Nontarget	73.861
Hbb-bs	102.897	-0.805409	0.787189	-1.02315	0.306239	0.409558	59.92	12.8497	222.366	382.385	82.4919	10.993	120.003	118.475	99.8089	6.94361	98.2481	208.246	13.0481	4.77582	Nontarget	14.7414
Apbb2	222.699	0.150434	0.296231	0.507826	0.611575	0.703137	225.718	200.088	238.344	149.912	208.401	184.132	256.537	215.888	267.465	243.026	220.617	312.37	207.838	187.451	Nontarget	19.8687
Atp9b	384.853	-3.50206	0.40031	-8.74837	2.16464e-18	2.72037e-17	484.014	77.0982	364.84	1149.33	304.641	54.9649	259.598	758.242	305.595	84.3152	335.926	518.194	370.007	321.174	Nontarget	38.4458
Armcx4	250.153	0.662433	0.247905	2.67213	0.0075372	0.0165352	269.931	356.12	210.382	234.645	216.36	266.58	270.006	268.544	233.822	356.108	208.851	188.875	217.158	204.763	Nontarget	13.2776
C1qtnf6	71.1837	-1.14638	0.609631	-1.88044	0.0600479	0.104359	52.3572	14.6854	42.609	204.228	54.271	5.49649	63.675	171.131	45.9794	6.94361	55.3013	268.783	9.32009	1.79093	Nontarget	1.46931
Tead3	31.5456	-0.625462	0.740585	-0.844551	0.398361	0.505787	27.9239	12.8497	23.9676	28.2443	38.3515	3.66433	53.8788	71.0851	34.7649	6.94361	40.5935	84.7514	7.45607	7.16373	Nontarget	1.61174
Rapgef4	241.436	-6.42349	0.633887	-10.1335	3.92316e-24	7.53011e-23	78.5359	36.7134	86.5496	351.968	99.8587	21.986	94.2879	107.944	98.6875	25.7905	94.1299	169.503	417.54	1696.61	Nontarget	183.702
Spp1	96.9589	0.440699	0.804931	0.547499	0.584036	0.679128	241.425	14.6854	170.436	273.753	114.331	4.58041	110.819	105.311	122.799	6.94361	114.132	65.3797	7.45607	5.3728	Nontarget	3.7732
Clec16a	185.014	0.200858	0.247397	0.811887	0.416856	0.524354	157.072	213.856	141.142	212.919	169.326	222.608	151.84	205.357	172.703	258.897	190.025	133.181	192.926	168.348	Nontarget	17.2337
Ptrhd1	50.6843	0.0730726	0.46126	0.158419	0.874126	0.911535	37.8136	45.8918	34.6198	43.4528	69.4669	40.3076	70.4098	42.1245	53.2688	53.565	57.6546	65.3797	48.4645	47.1612	Nontarget	7.74809
Reep2	232.295	-1.55918	0.492858	-3.16354	0.00155861	0.00392647	367.082	33.0421	250.328	695.246	183.074	10.993	180.616	584.478	238.308	20.8308	204.144	431.022	26.0962	26.864	Nontarget	8.78518
Reep3	471.138	-2.47259	0.440931	-5.60765	2.0509e-08	1.01053e-07	698.097	105.551	571.227	1336.18	447.193	44.888	456.745	797.733	536.052	44.6375	465.355	685.276	217.158	189.839	Nontarget	28.7735
Reep6	70.85	-1.21543	0.34015	-3.57323	0.000352606	0.00100746	44.7945	88.1122	41.2775	97.7689	51.3766	69.6222	52.6543	71.0851	45.4187	101.178	31.7688	94.4373	99.7249	102.68	Nontarget	32.636
Sars	403.283	1.75152	0.236805	7.39645	1.39876e-13	1.15927e-12	261.786	761.804	255.654	93.4236	264.843	1006.77	286.537	155.334	269.148	893.741	248.268	191.296	459.48	497.879	Nontarget	79.0639
Cep85l	200.019	-0.507501	0.223851	-2.26714	0.0233817	0.0456098	280.402	55.0702	268.97	306.343	290.169	51.3006	291.435	268.544	239.429	56.5408	275.33	266.362	74.5607	75.8161	Nontarget	7.0971
Jagn1	28.8012	-2.98556	0.598987	-4.98435	6.21715e-07	2.58803e-06	15.1254	22.9459	15.9784	86.9057	11.5778	21.0699	11.6329	28.9606	15.7003	18.8469	21.7675	29.0576	47.5324	56.1159	Nontarget	33.7648
Gm14295	53.1866	-1.83188	0.693232	-2.64253	0.00822897	0.0178678	49.4485	10.0962	75.8974	128.186	70.9141	10.993	86.9408	23.695	67.2869	3.96777	57.6546	113.809	24.2322	21.4912	Nontarget	18.9354
Josd2	10.8902	-2.03694	0.947891	-2.14891	0.0316412	0.0594952	5.23572	4.58918	11.9838	28.2443	7.95975	5.49649	13.4697	21.0623	7.85014	7.93555	10.5896	0	14.9121	13.1335	Nontarget	10.6715
Scarb1	228.088	-1.6892	0.31226	-5.40961	6.31614e-08	2.9511e-07	268.185	111.058	262.312	525.779	172.944	93.4404	199.597	418.613	173.825	69.4361	209.439	409.228	144.461	134.917	Nontarget	36.5175
Zfp994	80.8389	-0.5541	0.341423	-1.62291	0.104608	0.167841	114.022	22.0281	113.18	95.5963	117.225	27.4825	125.513	65.8196	97.0053	23.8066	138.842	92.0158	48.4645	50.7431	Nontarget	7.77877
Abhd4	777.142	1.1561	0.214378	5.39283	6.93583e-08	3.22605e-07	1082.05	220.281	1170.42	836.467	1115.09	227.188	1114.31	1226.88	1258.83	290.639	1139.56	946.794	118.365	133.126	Nontarget	30.9613
Rxrb	143.156	0.750851	0.241881	3.10421	0.00190785	0.00472488	147.764	156.95	125.164	147.74	155.577	165.811	140.207	113.21	155.881	184.502	165.904	94.4373	122.093	128.947	Nontarget	29.3331
Nrxn2	45.059	-1.00969	0.448558	-2.25097	0.0243877	0.0473485	31.4143	73.4269	23.9676	30.417	17.3667	69.6222	26.3271	23.695	19.0646	63.4844	21.1792	58.1153	96.9289	75.8161	Nontarget	7.7426
Fgfr3	8.40313	-4.11524	0.9992	-4.11853	3.81291e-05	0.000126556	1.74524	5.50702	3.9946	19.5538	4.34168	3.66433	2.44904	0	2.80362	6.94361	2.35325	7.26441	30.7563	26.267	Nontarget	4.20185
Arap3	48.2081	1.25751	0.503979	2.49517	0.0125898	0.0261643	40.7223	76.1804	54.5928	71.6972	41.246	70.5383	43.4704	47.3901	37.0078	85.3072	34.1221	12.1073	28.8923	31.6398	Nontarget	3.27779
Sun2	159.432	-2.85065	0.417604	-6.82621	8.71876e-12	6.05659e-11	186.741	57.8237	155.789	356.313	105.648	54.9649	68.573	350.16	111.584	65.4683	112.956	288.155	151.917	165.96	Nontarget	24.775
Gramd4	126.698	-1.34166	0.426584	-3.14513	0.00166012	0.00415433	100.061	172.553	97.2019	204.228	81.0447	123.671	61.2259	200.092	85.2301	113.082	88.8351	79.9085	207.838	158.796	Nontarget	25.5987
Dcun1d1	207.655	0.16849	0.379283	0.444232	0.656875	0.740283	212.338	108.305	276.959	312.86	254.712	158.482	255.924	113.21	250.644	139.864	288.273	271.205	127.685	136.708	Nontarget	23.4711
Atg16l1	243.179	0.639958	0.238346	2.685	0.00725298	0.0159604	128.566	458	113.18	156.43	171.496	520.335	137.146	123.741	154.199	506.883	134.723	101.702	341.115	356.993	Nontarget	72.804
Usp44	30.5149	-0.513935	0.741553	-0.693053	0.488276	0.592566	16.8707	52.3166	21.3045	8.69057	14.4723	60.4614	13.4697	0	11.2145	35.71	18.2377	41.165	65.2406	68.0554	Nontarget	10.3161
Fignl2	22.0435	-1.21968	0.692104	-1.76227	0.0780235	0.130759	9.30795	20.1924	15.9784	54.3161	13.7487	19.2377	11.6329	39.4917	24.1111	30.7503	12.9429	12.1073	23.3002	21.4912	Nontarget	3.41479
Gm14625	3.3533	2.65407	2.00275	1.32522	0.185099	0.271714	0	4.58918	3.9946	0	3.61807	10.993	4.28582	0	0.560724	6.94361	0.588312	0	8.38808	2.98489	Nontarget	11.6968
Ano1	20.0359	-0.260566	0.718349	-0.36273	0.716807	0.789212	12.7984	22.9459	5.32613	32.5896	20.2612	16.4895	21.4291	23.695	24.1111	13.8872	29.4156	29.0576	11.1841	17.3123	Nontarget	2.03292
Trnt1	216.903	1.60441	0.290541	5.52214	3.34904e-08	1.61359e-07	229.208	207.431	195.735	86.9057	261.224	306.887	282.864	73.7179	268.026	278.736	258.269	116.231	253.506	217.897	Nontarget	86.2652
Fam160a2	185.449	0.370099	0.222821	1.66097	0.09672	0.15706	158.235	208.349	179.757	139.049	149.788	251.006	187.964	118.475	166.535	238.066	192.966	135.602	222.75	247.746	Nontarget	13.3634
Gon4l	1452.02	1.35529	0.195623	6.92806	4.26642e-12	3.05754e-11	1389.79	1950.4	1135.8	986.38	1350.26	2529.3	1265.54	1111.03	1360.32	2658.41	1288.4	791.82	1255.42	1255.44	Nontarget	97.9667
Zfp976	95.231	-1.20293	0.37896	-3.17429	0.00150206	0.00379498	130.311	21.1102	157.121	67.3519	149.788	22.902	118.166	139.538	162.049	19.8389	121.781	77.487	71.7647	74.0252	Nontarget	11.1824
Srgap1	60.9075	0.227382	0.525973	0.432307	0.665518	0.747222	45.3763	90.8657	42.609	39.1076	47.7585	87.9439	47.7562	31.5934	47.6616	103.162	33.5338	128.338	56.8525	50.1461	Nontarget	4.36213
Otulinl	39.9089	-0.694868	0.723938	-0.959844	0.337134	0.442356	30.8326	36.7134	43.9406	119.495	26.7737	38.4754	20.2046	28.9606	41.4936	45.6294	24.1208	38.7435	16.7762	46.5642	Nontarget	7.28656
Slc37a1	17.5826	-3.59445	0.631558	-5.69139	1.26006e-08	6.36227e-08	6.39922	14.6854	13.3153	34.7623	4.34168	12.8251	4.28582	31.5934	10.6538	8.92749	7.05974	29.0576	35.4163	32.8338	Nontarget	6.55899
Nit1	45.9469	0.227019	0.509436	0.445627	0.655867	0.739399	31.4143	85.3587	29.2937	36.9349	39.7987	71.4544	41.0214	5.26557	23.5504	62.4924	25.2974	29.0576	74.5607	87.7557	Nontarget	46.9719
Taz	61.0017	-1.06536	0.406284	-2.62222	0.00873595	0.0188793	49.4485	55.0702	31.9568	69.5246	57.8891	78.783	39.7969	107.944	31.4006	65.4683	42.3584	94.4373	55.9205	74.0252	Nontarget	22.405
Bcl11a	35.7416	-0.395888	0.589297	-0.671797	0.501713	0.605286	19.1977	51.3988	7.9892	32.5896	30.3918	43.0558	21.4291	31.5934	35.3256	57.5327	32.9455	38.7435	60.5806	37.6096	Nontarget	8.75464
Gm7903	108.483	-0.850311	0.260855	-3.25971	0.00111527	0.00289385	47.7033	164.293	41.2775	52.1434	57.1655	179.552	53.2666	63.1868	53.8295	162.679	51.7714	62.9582	259.098	269.834	Nontarget	51.2026
Gm3264	11.604	1.72189	1.34114	1.2839	0.199178	0.288663	7.56271	25.6994	5.32613	4.34528	13.025	32.0629	0	2.63278	5.04652	17.855	7.64805	0	16.7762	24.4761	Nontarget	7.82421
Col6a3	261.579	-2.61266	0.61817	-4.22643	2.37423e-05	8.12182e-05	242.589	103.715	181.088	284.616	160.642	44.888	139.595	895.146	139.06	39.6777	126.487	1140.51	89.4728	74.6222	Nontarget	4.5815
Zfp433	88.3148	-0.670398	0.428695	-1.56381	0.117862	0.185894	76.2089	82.6052	113.18	139.049	76.703	89.776	74.6956	47.3901	56.0724	90.2669	70.5974	84.7514	119.297	115.814	Nontarget	42.7395
Gm11837	11.7368	0.789881	0.899418	0.878213	0.379828	0.487007	19.1977	4.58918	11.9838	4.34528	10.1306	4.58041	23.8781	15.7967	19.0646	6.94361	24.1208	7.26441	4.66004	7.76071	Nontarget	8.02533
2010315B03Rik	34.5418	-2.20807	0.545639	-4.04675	5.19333e-05	0.000169035	44.2128	12.8497	41.2775	52.1434	52.1002	3.66433	42.2459	60.554	43.1758	4.95972	30.0039	41.165	30.7563	24.4761	Nontarget	8.52724
Zfp981	96.4267	-1.51969	0.431931	-3.51836	0.00043422	0.00121832	62.8287	92.7014	66.5766	76.0425	41.9696	122.755	80.206	63.1868	72.8942	79.3555	37.652	72.6441	274.011	207.151	Nontarget	65.8496
Alg11	123.5	-2.47533	0.720391	-3.43609	0.00059017	0.00161316	143.692	46.8096	129.159	286.789	18.0903	50.3845	131.023	205.357	146.349	42.6536	115.897	125.916	145.393	141.484	Nontarget	21.3576
Serpinb6a	667.121	1.99242	0.238897	8.34009	7.42334e-17	8.28347e-16	1302.53	80.7696	1089.19	608.34	1238.83	66.874	1236.76	531.822	1086.12	87.291	1264.28	670.747	30.7563	45.3703	Nontarget	16.9121
Gm4791	16.7494	-3.7758	1.07785	-3.5031	0.000459881	0.00128443	5.81747	16.521	6.65766	32.5896	7.95975	0	9.18389	47.3901	8.97159	0.991944	12.3545	55.6938	13.0481	17.3123	Nontarget	13.7595
C87436	51.8834	-1.22535	0.687046	-1.7835	0.0745054	0.125743	25.0151	66.0842	21.3045	52.1434	52.8238	108.098	15.3065	57.9212	9.53231	75.3877	18.826	41.165	78.2887	104.471	Nontarget	20.4561
Pde2a	16.0225	-1.83691	1.27639	-1.43914	0.15011	0.22857	15.7072	3.67134	1.33153	30.417	13.7487	18.3216	16.531	44.7573	20.1861	0	19.4143	14.5288	8.38808	17.3123	Nontarget	1.87701
Clcn5	127.311	-1.95916	0.596868	-3.28239	0.00102931	0.00269023	178.015	42.2204	158.452	482.327	102.753	18.3216	82.0427	210.623	83.5479	20.8308	95.3065	227.618	45.6684	34.6247	Nontarget	6.20382
Esrrg	13.864	0.282313	0.833073	0.338882	0.734699	0.803496	12.7984	7.34269	21.3045	8.69057	14.4723	10.993	15.3065	21.0623	26.354	15.8711	7.64805	7.26441	13.0481	11.9396	Nontarget	1.6449
Fam124a	169.486	0.74848	0.232987	3.21254	0.00131568	0.00336109	227.463	132.168	206.388	217.264	212.742	116.342	233.883	202.724	188.964	99.1944	213.557	171.924	77.3567	72.8313	Nontarget	13.1725
Zfp383	28.2269	1.4415	0.568887	2.53389	0.0112805	0.0236846	31.9961	30.2886	27.9622	15.2085	25.3265	27.4825	40.4091	26.3278	45.4187	27.7744	42.9468	7.26441	20.5042	26.267	Nontarget	6.53974
B4galnt1	63.362	-1.29323	0.696107	-1.8578	0.0631967	0.109103	73.3001	33.0421	66.5766	184.675	45.5876	27.4825	12.8574	155.334	59.4368	31.7422	43.5351	101.702	34.4843	17.3123	Nontarget	8.75968
Gm8765	11.3946	-2.77808	2.00203	-1.38763	0.165249	0.247231	0	12.8497	3.9946	0	10.1306	5.49649	7.95937	50.0229	16.8217	0	10.0013	2.42147	26.0962	13.7305	Nontarget	4.38957
St18	13.7445	-0.331861	2.18352	-0.151985	0.879199	0.915372	9.8897	28.4529	11.9838	23.8991	7.23613	36.6433	0	0	10.093	0	8.23636	33.9006	0	22.0882	Nontarget	1.25882
Sall2	156.051	2.64708	0.472156	5.60635	2.06634e-08	1.01723e-07	265.277	22.0281	227.692	110.805	266.29	33.895	254.088	210.623	255.13	39.6777	277.095	205.825	12.1161	4.17884	Nontarget	1.0313
Lcp1	67.5118	1.18927	0.372042	3.1966	0.00139057	0.00353875	70.3914	55.988	62.582	110.805	75.9794	41.2237	89.3899	115.842	82.4265	46.6214	75.3039	87.1729	17.7082	13.7305	Nontarget	2.52078
Gm38425	39.1646	-0.810342	0.457524	-1.77115	0.0765362	0.128649	16.2889	72.509	15.9784	15.2085	13.025	80.6152	20.2046	26.3278	12.8967	58.5247	20.5909	36.322	79.2207	80.592	Nontarget	35.2483
Cacna1a	100.343	-3.91337	0.343517	-11.3921	4.57891e-30	1.28912e-28	55.266	39.4669	41.2775	152.085	58.6127	37.5594	57.5524	100.046	44.8579	66.4602	51.7714	162.238	274.943	262.67	Nontarget	21.5506
Hs3st4	18.8091	-2.58213	0.856462	-3.01488	0.00257079	0.00621396	14.5437	15.6032	15.9784	36.9349	5.78891	6.41257	6.12259	21.0623	16.261	4.95972	13.5312	77.487	14.9121	13.7305	Nontarget	3.27275
Zfp384	217.705	0.315334	0.208252	1.51419	0.129976	0.202297	169.288	279.022	217.04	199.883	185.245	263.832	224.087	176.396	177.75	308.494	190.025	198.56	230.206	228.045	Nontarget	47.7676
Cadps2	158.516	1.62858	0.503747	3.23293	0.00122525	0.00315055	94.8248	321.243	95.8703	95.5963	92.6225	403.076	89.3899	7.89835	98.6875	383.882	98.2481	89.5944	196.654	151.632	Nontarget	34.169
Lrch1	226.541	1.15378	0.220437	5.23407	1.65822e-07	7.38247e-07	273.421	168.882	282.285	180.329	286.551	188.713	276.741	221.154	317.37	192.437	284.743	295.419	97.8609	105.665	Nontarget	14.5809
Amz2	160.08	0.0825423	0.282257	0.292436	0.769953	0.832323	148.927	167.964	146.469	108.632	146.894	167.643	157.963	100.046	177.75	202.357	136.488	186.453	216.226	177.302	Nontarget	44.426
Rpl31	993.373	-2.02541	0.304656	-6.6482	2.967e-11	1.95817e-10	535.207	845.327	432.748	2146.57	711.312	886.767	693.69	1408.54	659.412	612.029	689.501	2239.86	1069.01	977.252	Nontarget	667.008
Fam19a5	136.94	1.35031	0.406576	3.32117	0.000896421	0.00236839	184.996	42.2204	304.921	134.704	201.165	38.4754	225.311	184.295	179.992	25.7905	222.382	133.181	15.8441	23.8791	Nontarget	5.09485
Ncor1	2154.04	0.983037	0.163707	6.00488	1.91478e-09	1.05479e-08	3101.88	1170.24	2687.03	2094.43	3005.17	1263.28	2648.02	2738.09	2959.5	1458.16	2949.21	2532.86	804.324	744.431	Nontarget	72.3688
Slc25a19	84.1029	0.972433	0.338662	2.8714	0.0040866	0.00948927	77.9541	125.744	66.5766	39.1076	91.8989	99.8529	81.4305	76.3507	98.6875	104.154	90.0117	41.165	84.8128	99.6952	Nontarget	22.5938
Tle2	36.6687	-0.897868	0.648775	-1.38394	0.166376	0.248668	47.1215	21.1102	31.9568	54.3161	53.5474	15.5734	34.2865	102.679	38.69	6.94361	42.9468	26.6362	21.4362	16.1184	Nontarget	4.21114
D16Ertd472e	157.296	0.632306	0.328273	1.92616	0.0540847	0.0952984	119.258	265.255	126.496	110.805	81.0447	274.825	115.717	36.859	101.491	292.623	110.014	96.8588	240.458	230.433	Nontarget	27.9468
Phldb2	275.313	1.78227	0.431651	4.12896	3.64414e-05	0.000121344	482.85	42.2204	410.112	317.206	445.746	39.3915	366.131	352.793	338.677	29.7583	435.351	571.467	14.9121	7.76071	Nontarget	1.34221
Ppil2	282.276	0.619539	0.196162	3.15831	0.00158689	0.00398738	180.923	452.493	183.751	169.466	210.572	518.502	211.229	134.272	215.879	466.214	230.618	176.767	411.948	389.229	Nontarget	136.205
Strada	106.158	-0.133078	0.320872	-0.414737	0.678334	0.758089	50.612	205.595	55.9244	47.7981	57.1655	166.727	74.6956	71.0851	57.7546	200.373	57.0662	96.8588	154.713	189.839	Nontarget	43.1041
Prkd2	33.2528	0.750341	0.586601	1.27913	0.20085	0.29055	28.5056	38.5491	43.9406	17.3811	28.2209	43.0558	47.144	18.4295	21.3075	46.6214	25.8857	46.0079	35.4163	25.0731	Nontarget	5.33653
Cyfip2	103.651	1.24827	0.295698	4.22145	2.42734e-05	8.28979e-05	81.4446	166.128	73.2343	39.1076	91.1753	165.811	94.2879	47.3901	104.855	180.534	91.7766	77.487	113.705	124.171	Nontarget	11.036
Mlst8	106.252	-0.224617	0.264972	-0.847701	0.396604	0.504235	78.5359	136.758	69.2397	86.9057	88.2808	158.482	72.2466	94.7802	91.3981	150.775	68.2442	121.073	138.869	131.932	Nontarget	21.7676
Prmt1	316.689	1.81589	0.210914	8.60961	7.33124e-18	8.86288e-17	234.444	595.675	207.719	126.013	231.556	666.908	230.209	131.639	257.933	631.868	271.8	77.487	372.803	397.587	Nontarget	214.568
Slc30a6	19.448	-4.59228	0.744725	-6.16641	6.98596e-10	3.99481e-09	8.72621	11.014	6.65766	54.3161	2.89445	7.32866	8.57163	18.4295	8.41086	11.9033	5.88312	14.5288	50.3285	63.2796	Nontarget	19.8409
March2	116.374	-1.14956	0.348596	-3.29769	0.000974825	0.00255835	107.041	75.2625	118.506	225.955	122.291	67.7901	131.636	181.662	106.538	63.4844	111.191	111.388	127.685	78.801	Nontarget	44.8029
D430019H16Rik	208.535	-1.05604	0.322049	-3.27914	0.00104124	0.00271755	229.79	55.0702	339.541	278.098	282.209	40.3076	296.333	394.917	284.848	49.5972	268.858	205.825	93.2009	100.889	Nontarget	9.70228
Ehbp1	288.015	1.14256	0.237604	4.80868	1.51928e-06	6.03114e-06	389.771	153.279	350.193	397.594	389.304	162.146	403.479	236.95	406.525	171.606	402.994	401.964	87.6088	78.801	Nontarget	10.0664
Cacnb2	50.1606	1.03807	0.573464	1.81018	0.0702677	0.119497	65.7374	12.8497	89.2127	69.5246	54.271	9.16082	69.1853	57.9212	89.7159	14.8792	64.126	94.4373	4.66004	6.56675	Nontarget	1.01136
Sh2d3c	87.2121	0.209441	0.335463	0.624334	0.532408	0.634086	22.6881	238.637	34.6198	36.9349	29.6682	218.027	27.5517	44.7573	31.4006	231.123	18.826	60.5367	112.773	113.426	Nontarget	23.8134
Cybc1	55.2845	-2.42934	0.579575	-4.1916	2.76995e-05	9.3746e-05	70.3914	19.2746	54.5928	206.401	37.6279	12.8251	45.9194	73.7179	47.1008	13.8872	47.0649	75.0655	37.2803	32.8338	Nontarget	9.94601
Gstz1	80.226	-0.127764	0.338843	-0.377059	0.706129	0.780829	68.6462	71.5912	75.8974	69.5246	104.924	78.783	82.655	110.577	85.2301	65.4683	81.7753	65.3797	92.2689	70.4433	Nontarget	29.4166
Rad51b	16.544	-3.68051	0.750203	-4.90601	9.29456e-07	3.7889e-06	9.8897	0.917836	9.32073	19.5538	12.3014	10.993	15.3065	34.2262	6.72869	7.93555	9.41299	33.9006	28.8923	32.2368	Nontarget	12.4329
Cttn	614.264	2.39639	0.205533	11.6594	2.05466e-31	6.25329e-30	957.556	469.014	928.078	328.069	945.039	500.181	893.286	560.783	917.345	463.238	878.349	353.534	202.246	202.972	Nontarget	41.7846
Slc35c2	95.712	-2.8108	0.402372	-6.98556	2.83714e-12	2.06731e-11	49.4485	107.387	43.9406	165.121	56.4419	76.0348	34.8988	221.154	44.2972	77.3716	34.1221	96.8588	177.082	155.811	Nontarget	51.9452
Zmynd8	1019.15	-0.584604	0.15278	-3.82645	0.000130003	0.000398078	874.366	1094.98	773.62	1316.62	790.91	1054.41	761.651	1079.44	864.637	1256.79	823.048	1360.87	1169.67	1047.1	Nontarget	234.891
Ptgr2	165.963	0.746332	0.338927	2.20204	0.0276623	0.0529166	204.775	165.21	189.078	232.473	194.652	155.734	197.76	78.9835	193.45	134.904	201.791	140.445	111.841	122.38	Nontarget	26.8565
Smn1	103.089	1.23106	0.385191	3.19596	0.00139367	0.00354554	87.8438	167.046	117.175	32.5896	79.5975	163.979	109.594	44.7573	104.295	120.025	98.8364	94.4373	109.045	114.023	Nontarget	64.2527
Cdh23	242.441	-3.83084	1.48492	-2.57982	0.00988506	0.0210462	267.604	10.0962	271.633	832.122	183.798	0	20.8168	655.563	160.928	48.6052	184.142	615.053	74.5607	69.2494	Nontarget	3.76473
Tbc1d7	54.976	0.770538	0.453822	1.69789	0.0895291	0.147059	34.3231	122.99	25.2991	32.5896	36.1807	104.433	33.6743	50.0229	27.4755	105.146	42.9468	7.26441	72.6967	74.6222	Nontarget	42.624
Ldlr	81.2607	-3.85752	0.496019	-7.77694	7.42978e-15	6.92915e-14	94.8248	32.1243	77.2289	145.567	56.4419	22.902	48.3685	152.701	45.9794	12.8953	44.1234	108.966	152.849	142.678	Nontarget	19.9143
Dmtn	13.6494	-0.873873	0.917013	-0.952956	0.340612	0.446096	4.65398	16.521	9.32073	21.7264	20.9848	18.3216	14.6942	5.26557	7.28942	10.9114	5.29481	16.9503	24.2322	14.9244	Nontarget	2.96124
Dhx30	591.997	1.62302	0.184718	8.78648	1.54325e-18	1.95282e-17	439.801	1161.06	387.476	236.818	418.972	1307.25	405.316	365.957	438.486	1325.24	364.165	259.097	590.894	587.426	Nontarget	82.8261
Smc5	996.379	1.71267	0.144846	11.824	2.93229e-32	9.35502e-31	1340.93	1023.39	1151.78	743.044	1226.52	1101.13	1136.35	697.688	1247.05	1224.06	1228.98	610.21	625.378	592.799	Nontarget	81.75
Fam214b	55.3381	-0.373026	0.527432	-0.707249	0.479412	0.58436	58.7565	27.5351	49.2667	106.459	46.3113	17.4056	58.7769	150.069	56.6331	25.7905	80.0104	65.3797	10.2521	22.0882	Nontarget	2.84111
Kcnma1	136.252	-1.16128	0.469923	-2.47122	0.0134652	0.0277983	210.592	35.7956	153.126	380.212	80.3211	37.5594	124.901	321.2	125.602	40.6697	115.897	205.825	38.2124	37.6096	Nontarget	4.82619
Mtfr1	125.908	-0.476723	0.342412	-1.39225	0.163847	0.245645	100.642	155.114	101.196	63.0066	97.6878	129.168	120.615	171.131	123.92	123.993	104.131	111.388	186.402	174.317	Nontarget	43.8048
Zfp219	388.455	0.97695	0.139833	6.98654	2.81748e-12	2.05479e-11	381.626	472.685	395.465	412.802	397.987	452.544	369.192	450.206	399.236	492.004	374.166	404.385	205.042	231.03	Nontarget	45.9312
Sept6	392.928	3.09658	0.370442	8.35915	6.31722e-17	7.1116e-16	749.29	111.058	601.853	219.437	730.126	110.846	597.565	286.973	1016.59	156.727	663.027	162.238	39.1444	56.1159	Nontarget	7.29398
Atg7	72.6138	0.668425	0.363228	1.84023	0.0657338	0.112805	47.1215	107.387	51.9298	36.9349	50.6529	149.321	58.1646	21.0623	42.615	138.872	42.9468	53.2723	111.841	104.471	Nontarget	16.1277
Tpm3	1993.54	2.4396	0.17822	13.6887	1.18553e-42	6.77089e-41	2864.52	1642.01	2704.34	821.259	2907.48	1951.25	2972.52	1179.49	3071.65	1809.31	2949.21	1247.06	891	898.451	Nontarget	271.573
Fdps	450.03	2.19841	0.195898	11.2222	3.17328e-29	8.43113e-28	254.805	974.742	295.6	130.359	312.601	994.865	297.558	163.233	321.295	1120.9	310.629	101.702	505.149	516.983	Nontarget	266.164
Gpm6a	12.5656	-2.49301	0.941603	-2.64762	0.00810595	0.0176262	6.39922	5.50702	11.9838	30.417	4.34168	5.49649	9.79615	5.26557	6.72869	8.92749	11.1779	48.4294	6.52406	14.9244	Nontarget	2.75036
Prlr	157.011	-2.17723	0.387975	-5.61178	2.00258e-08	9.88196e-08	176.269	25.6994	179.757	297.652	204.059	8.24474	142.656	363.324	200.739	7.93555	172.375	351.113	37.2803	31.0428	Nontarget	4.36725
Elp3	460.23	2.24931	0.173189	12.9876	1.43901e-38	6.77522e-37	411.877	792.092	360.845	180.329	456.6	928.907	399.193	207.99	426.711	905.645	397.11	191.296	400.764	383.857	Nontarget	92.418
Ano6	174.692	-1.84515	0.314842	-5.86056	4.6131e-09	2.44582e-08	199.539	43.1383	170.436	477.981	163.537	36.6433	144.493	405.449	169.339	25.7905	147.666	358.377	61.5126	41.7884	Nontarget	5.65036
Ankle2	258.104	-2.87573	0.472601	-6.0849	1.16562e-09	6.52984e-09	208.265	211.102	191.741	669.174	124.462	156.65	115.717	273.809	120.556	168.63	138.253	254.254	494.897	485.94	Nontarget	62.2893
Fibp	86.8412	-1.13061	0.444495	-2.54358	0.0109724	0.0231229	56.4295	84.4409	42.609	193.365	60.0599	95.2725	83.8795	131.639	66.1655	92.2508	57.0662	65.3797	100.657	86.5617	Nontarget	56.69
Tet1	194.918	0.499835	0.258777	1.93152	0.0534184	0.0942751	279.239	53.2345	271.633	228.127	331.415	40.3076	277.353	273.809	319.613	50.5891	290.626	230.04	42.8724	39.9975	Nontarget	1.88327
Apbb1	221.406	1.90699	0.255708	7.45767	8.80635e-14	7.46327e-13	120.422	504.81	109.186	56.4887	111.436	532.244	115.105	44.7573	134.013	582.271	97.6598	53.2723	308.495	329.532	Nontarget	68.7608
Ecsit	101.622	1.12038	0.269685	4.15439	3.26157e-05	0.000109266	55.266	217.527	59.919	47.7981	60.0599	231.769	64.2872	47.3901	57.7546	215.252	61.1844	46.0079	129.549	128.947	Nontarget	56.1265
Sez6l	7.77547	-2.77091	0.898573	-3.08367	0.00204462	0.00503492	3.49048	11.014	2.66307	10.8632	0.723613	10.0769	4.28582	5.26557	2.80362	4.95972	3.52987	12.1073	16.7762	20.2972	Nontarget	1.92626
Akt1s1	103.725	-1.11477	0.280435	-3.97513	7.03403e-05	0.000223676	95.4065	56.9058	133.153	115.15	111.436	45.8041	122.452	155.334	110.463	48.6052	122.957	157.395	85.7448	91.3376	Nontarget	37.6618
E030030I06Rik	107.306	-3.65118	0.819015	-4.45801	8.27247e-06	3.00529e-05	122.749	68.8377	86.5496	204.228	59.3363	11.9091	34.8988	210.623	92.5195	7.93555	99.4247	205.825	171.49	125.962	Nontarget	53.4868
Echdc2	19.1636	-0.289541	0.608459	-0.47586	0.634174	0.722037	14.5437	16.521	13.3153	15.2085	22.432	12.8251	20.8168	18.4295	27.4755	16.863	22.3558	31.4791	20.5042	15.5214	Nontarget	10.0808
Ubox5	80.5658	-0.0144612	0.340588	-0.0424594	0.966132	0.977728	43.0493	143.182	58.5874	39.1076	46.3113	147.489	37.9601	68.4524	51.0259	152.759	39.4169	67.8011	97.8609	134.917	Nontarget	18.1718
Cacna1c	101.617	-3.16123	0.295702	-10.6906	1.12653e-26	2.52948e-25	68.6462	74.3447	75.8974	178.157	60.7835	49.4684	60.0014	155.334	55.5117	50.5891	50.0065	145.288	208.77	189.839	Nontarget	8.65645
Rslcan18	22.9706	-1.34887	0.740784	-1.82087	0.0686268	0.117031	20.3611	12.8497	23.9676	26.0717	13.025	10.993	12.2452	55.2884	23.5504	21.8228	34.7104	14.5288	28.8923	23.2821	Nontarget	6.17121
Eif3j2	258.061	8.8604	2.15824	4.10539	4.03629e-05	0.000133434	359.52	184.485	661.772	0	962.406	137.412	427.357	42.1245	302.23	365.035	137.077	0	0	33.4307	Nontarget	5.70113
Gm5141	39.4723	-1.44982	0.522046	-2.77719	0.00548304	0.0124059	52.939	9.17836	42.609	82.5604	47.0349	12.8251	45.9194	26.3278	54.3903	9.91944	64.126	48.4294	28.8923	27.461	Nontarget	6.74772
Myo7a	1388.02	1.33903	0.269702	4.96485	6.87539e-07	2.84983e-06	1371.76	1608.97	1206.37	968.998	1152.72	2439.53	974.717	1261.1	1415.27	2769.51	1191.33	1096.93	937.601	1037.55	Nontarget	76.4622
Dtx2	267.311	0.70828	0.212183	3.33806	0.000843653	0.00224115	90.7525	722.337	89.2127	80.3878	94.0698	614.691	90.0021	63.1868	99.8089	643.771	93.5416	87.1729	480.917	492.506	Nontarget	108.169
Mtif3	130.199	0.850386	0.404901	2.10023	0.0357085	0.0662757	152.418	122.99	115.843	143.394	156.301	128.251	154.902	39.4917	154.76	173.59	136.488	121.073	114.637	108.65	Nontarget	13.9328
Mib2	142.468	0.421757	0.40639	1.03781	0.299357	0.401893	133.802	178.06	113.18	193.365	120.12	189.629	104.084	226.419	126.724	196.405	134.723	65.3797	109.977	102.68	Nontarget	15.0932
Limch1	115.571	2.21161	0.529637	4.1757	2.97067e-05	0.000100109	242.589	52.3166	159.784	89.0783	127.356	46.7202	126.738	123.741	300.548	71.4199	152.961	77.487	25.1642	22.0882	Nontarget	2.48374
Eif4g3	1004.33	1.97527	0.236683	8.34561	7.08471e-17	7.93237e-16	1213.52	1157.39	1113.16	716.972	1065.16	1139.61	979.003	1184.75	1093.41	1477	1243.1	912.894	399.832	364.753	Nontarget	39.7767
3110082J24Rik	5.02741	2.44386	2.10742	1.15965	0.246193	0.343195	4.65398	15.6032	0	0	0	9.16082	2.44904	0	7.85014	13.8872	0	2.42147	8.38808	5.96978	Nontarget	10.0893
9030624G23Rik	46.8234	-2.07179	0.631669	-3.27986	0.00103858	0.00271233	27.3421	45.8918	25.2991	80.3878	14.4723	34.8111	33.062	39.4917	38.1292	32.7341	40.0052	128.338	77.3567	38.2066	Nontarget	17.3256
Zfp995	52.6019	0.83997	0.403819	2.08006	0.0375197	0.0691095	45.958	58.7415	43.9406	45.6255	57.8891	89.776	57.5524	52.6557	55.5117	61.5005	44.7117	24.2147	49.3965	48.9522	Nontarget	17.3493
Zfp672	36.4177	0.18307	0.484652	0.377736	0.705627	0.780578	41.304	20.1924	41.2775	49.9708	38.3515	18.3216	58.7769	55.2884	43.1758	21.8228	40.0052	53.2723	8.38808	19.7003	Nontarget	3.10536
Tmem250-ps	107.565	-1.0932	0.405012	-2.69918	0.00695103	0.0153655	75.6271	113.812	65.2451	134.704	79.5975	79.6991	109.594	263.278	75.6978	102.17	87.0701	116.231	96.9289	106.262	Nontarget	26.2269
Kcnj12	13.5287	-3.57283	1.05947	-3.37229	0.000745448	0.00199988	9.30795	11.9319	7.9892	52.1434	5.78891	3.66433	3.67356	2.63278	3.92507	4.95972	7.05974	46.0079	19.5722	10.7456	Nontarget	2.01232
Gfi1	17.3743	0.198759	0.759886	0.261565	0.793657	0.850251	12.2167	42.2204	5.32613	13.0359	10.1306	29.3146	4.89807	23.695	10.6538	33.7261	11.1779	0	22.3682	24.4761	Nontarget	5.74779
Ttc28	223.659	-0.594509	0.289591	-2.05293	0.0400797	0.0732453	263.531	79.8517	320.899	197.71	301.747	76.0348	307.966	384.386	273.633	65.4683	312.982	326.898	117.433	102.68	Nontarget	6.02361
Asb13	98.493	-3.99269	0.714765	-5.58601	2.32342e-08	1.13836e-07	57.593	40.3848	39.946	310.688	68.7433	7.32866	55.1033	121.108	41.4936	12.8953	75.8922	418.914	72.6967	56.1159	Nontarget	22.7289
Zdbf2	513.438	1.1722	0.211911	5.53158	3.17352e-08	1.5326e-07	803.393	311.146	785.604	384.558	668.619	318.797	677.159	479.167	666.701	438.439	709.504	409.228	274.943	260.879	Nontarget	15.929
Tmem254c	18.9307	1.33423	1.84897	0.721607	0.470536	0.57639	34.3231	20.1924	6.65766	0	0	9.16082	9.79615	2.63278	38.1292	14.8792	64.7143	46.0079	8.38808	10.1486	Nontarget	5.67033
Gm3376	30.1768	2.96933	4.98549	0.595594	0.551446	0.650525	0	66.0842	0	0	87.5572	83.3635	40.4091	0	0	49.5972	0	82.33	0	13.1335	Nontarget	3.09043
Gm21693	15.5815	1.15302	2.09655	0.549963	0.582345	0.677496	9.30795	33.9599	33.2883	28.2443	0	22.902	14.082	0	0	27.7744	16.4727	0	19.5722	12.5365	Nontarget	7.7831
Gm21704	163.028	2.27022	2.30224	0.986093	0.324087	0.428847	184.996	421.287	0	49.9708	1.44723	367.349	75.3079	0	133.452	396.777	33.5338	7.26441	319.679	291.325	Nontarget	149.61
Bin2	194.757	1.65043	0.219078	7.53353	4.93863e-14	4.26415e-13	108.787	448.822	117.175	91.251	122.291	436.971	124.901	134.272	111.584	501.923	110.603	84.7514	171.49	161.781	Nontarget	55.1606
Gm3558	49.4115	-0.353102	0.702142	-0.502893	0.61504	0.705897	15.1254	63.3307	54.5928	123.841	36.9043	53.1328	9.18389	71.0851	22.9897	76.3797	25.2974	94.4373	25.1642	20.2972	Nontarget	8.81037
Asxl2	460.111	-1.45027	0.168019	-8.63159	6.05061e-18	7.37408e-17	521.827	153.279	424.759	932.064	480.479	171.307	451.235	926.74	495.68	164.663	467.12	767.606	252.574	232.224	Nontarget	18.4297
Gfra4	10.171	-1.25066	1.03191	-1.21199	0.225517	0.319521	1.16349	16.521	2.66307	0	3.61807	15.5734	7.95937	10.5311	2.2429	14.8792	4.70649	4.84294	32.6203	25.0731	Nontarget	16.733
Arrb2	340.895	0.306431	0.279872	1.09489	0.273563	0.373814	148.346	692.048	157.121	186.847	137.487	742.026	214.291	160.6	151.956	762.805	121.192	118.652	604.874	574.292	Nontarget	217.2
Dyrk1b	186.053	0.0334349	0.278552	0.120031	0.904458	0.933259	136.129	244.144	189.078	158.603	147.617	247.342	156.738	218.521	123.359	267.825	149.431	113.809	211.566	240.582	Nontarget	58.8174
Nol8	767.135	3.39227	0.379463	8.93965	3.90398e-19	5.19462e-18	869.13	1344.63	845.523	351.968	794.528	1611.39	836.346	113.21	754.735	1504.78	547.13	242.147	417.54	506.834	Nontarget	69.7303
Ephx2	30.9488	1.34589	0.583812	2.30535	0.021147	0.0416439	26.7604	34.8778	29.2937	26.0717	34.0098	66.874	22.6536	7.89835	34.2042	42.6536	27.0623	12.1073	27.0283	41.7884	Nontarget	10.7353
Capg	34.6064	-0.616519	0.532866	-1.15699	0.247277	0.344363	16.8707	59.6593	18.6415	21.7264	10.1306	45.8041	29.3884	28.9606	23.5504	54.5569	18.2377	19.3718	60.5806	77.0101	Nontarget	37.38
Cd82	41.5836	-2.95838	0.43912	-6.73708	1.616e-11	1.09406e-10	51.7755	11.014	42.609	78.2151	35.4571	7.32866	35.511	71.0851	42.615	10.9114	45.3	58.1153	45.6684	46.5642	Nontarget	16.5242
Ndufs8	161.523	-0.582093	0.250149	-2.32698	0.0199663	0.0395781	82.6081	292.79	75.8974	84.733	76.703	284.901	82.0427	86.8818	77.3799	250.962	91.7766	154.974	312.223	307.443	Nontarget	276.982
Enox2	86.5823	1.50863	0.28581	5.27845	1.30278e-07	5.86644e-07	102.387	111.976	91.8757	65.1793	83.9392	112.678	99.7983	36.859	92.5195	118.041	97.6598	62.9582	65.2406	71.0403	Nontarget	11.2236
Tnip1	525.751	2.94496	0.217536	13.5378	9.35224e-42	5.10083e-40	607.926	688.377	543.265	182.502	621.584	786.914	595.728	273.809	678.476	923.5	653.614	278.469	261.894	264.461	Nontarget	56.5661
Gfm2	161.996	0.778638	0.280195	2.77891	0.00545413	0.0123456	119.84	310.229	98.5334	73.8698	88.2808	355.44	90.6144	129.006	103.173	301.551	101.19	60.5367	225.546	210.136	Nontarget	44.3353
Gabpb1	124.505	1.0552	0.251106	4.2022	2.6433e-05	8.97355e-05	155.326	109.222	155.789	63.0066	157.748	121.839	157.351	68.4524	150.274	101.178	173.552	53.2723	143.529	132.529	Nontarget	54.7368
Scube1	34.7913	-2.72455	0.594716	-4.58126	4.62181e-06	1.72962e-05	27.3421	30.2886	21.3045	36.9349	28.2209	11.9091	26.3271	100.046	21.8682	16.863	15.8844	50.8509	56.8525	42.3854	Nontarget	3.71924
Clip4	120.946	0.188377	0.304223	0.619206	0.535781	0.636995	104.714	178.06	85.2181	130.359	94.7934	182.3	113.88	84.2491	94.7624	143.832	101.778	75.0655	177.082	127.156	Nontarget	41.022
Chka	169.052	-0.0949828	0.273022	-0.347895	0.727919	0.798142	187.904	98.2084	169.105	260.717	206.23	95.2725	174.494	279.075	234.383	105.146	202.379	181.61	75.4927	96.7104	Nontarget	21.9087
Spag16	15.0933	-2.20992	0.821817	-2.68907	0.00716512	0.0157776	11.6349	15.6032	2.66307	32.5896	5.78891	15.5734	5.51033	5.26557	8.41086	16.863	10.5896	7.26441	33.5523	39.9975	Nontarget	8.48597
Myh14	128.592	2.94385	0.368594	7.9867	1.38596e-15	1.37978e-14	175.688	149.607	155.789	63.0066	131.698	199.706	120.615	55.2884	184.478	232.115	131.194	94.4373	55.9205	50.7431	Nontarget	4.63112
Gm715	16.4302	0.180311	0.732526	0.24615	0.805566	0.85961	10.4714	20.1924	22.6361	17.3811	18.814	10.993	11.6329	5.26557	14.0181	23.8066	20.0026	16.9503	13.9801	23.8791	Nontarget	10.738
Sec1	32.8868	-1.25818	0.667752	-1.88421	0.0595367	0.103612	12.7984	38.5491	30.6252	15.2085	10.8542	38.4754	11.6329	0	11.2145	35.71	17.6494	21.7932	109.045	106.859	Nontarget	26.4117
Dnajc5	250.301	-1.252	0.262498	-4.76956	1.84633e-06	7.2497e-06	267.022	95.4549	205.056	404.111	322.008	87.9439	317.15	423.878	292.137	118.041	280.625	348.692	152.849	189.242	Nontarget	25.2674
Rpl37rt	23.6995	-4.36485	0.846019	-5.15929	2.47893e-07	1.07978e-06	8.72621	8.26052	6.65766	41.2802	0	21.0699	9.18389	18.4295	10.093	17.855	6.47143	24.2147	80.1528	79.398	Nontarget	134.197
Sort1	212.749	-3.29398	0.486178	-6.77525	1.24191e-11	8.50901e-11	223.391	101.88	170.436	456.255	115.055	87.9439	99.7983	194.826	119.434	105.146	131.782	184.032	507.945	480.567	Nontarget	44.6032
Socs1	21.1161	-2.66445	0.667464	-3.99189	6.55479e-05	0.000209687	4.07223	27.5351	10.6523	10.8632	8.68336	22.902	10.4084	44.7573	4.48579	28.7664	6.47143	33.9006	39.1444	42.9824	Nontarget	24.9378
Runx2	16.256	-2.51235	1.31882	-1.90499	0.0567811	0.0994556	8.14446	12.8497	26.6307	23.8991	9.40698	0	14.082	42.1245	19.0646	8.92749	8.82468	0	27.9603	25.67	Nontarget	2.90394
Ifi47	4.83399	-1.60194	1.53134	-1.0461	0.295513	0.397756	0.581747	11.014	3.9946	19.5538	0.723613	9.16082	2.44904	0	1.12145	3.96777	2.35325	0	5.59205	7.16373	Nontarget	2.5138
Wnk3	927.419	1.27886	0.254956	5.01601	5.27545e-07	2.21612e-06	1674.85	294.625	1386.13	877.747	1358.95	371.013	1182.27	1108.4	1697.31	424.552	1344.88	796.663	249.778	216.703	Nontarget	15.5333
Surf1	60.7369	0.131195	0.439745	0.298344	0.76544	0.828508	53.5207	66.0842	65.2451	65.1793	66.5724	32.0629	61.2259	36.859	67.2869	68.4441	81.7753	70.2226	61.5126	54.325	Nontarget	39.7829
Trim2	131.892	0.0588442	0.396869	0.148271	0.882129	0.916972	193.722	21.1102	222.366	223.782	198.27	16.4895	162.249	181.662	166.535	14.8792	235.913	174.346	21.4362	13.7305	Nontarget	1.69129
Xbp1	131.197	0.0704793	0.267618	0.263358	0.792275	0.849211	144.855	96.3728	133.153	130.359	178.733	92.5243	161.024	102.679	168.217	77.3716	191.201	135.602	111.841	112.829	Nontarget	35.007
Add2	30.3736	-1.16553	0.612862	-1.90178	0.0572	0.100083	22.1064	26.6172	41.2775	26.0717	28.2209	33.895	18.3678	73.7179	19.6253	16.863	19.4143	36.322	31.6883	31.0428	Nontarget	3.97815
Eya2	6.73121	-1.3604	0.973591	-1.3973	0.162325	0.243848	0.581747	8.26052	2.66307	13.0359	4.34168	6.41257	2.44904	13.1639	3.92507	14.8792	2.94156	9.68588	6.52406	5.3728	Nontarget	1.76393
Sema6c	48.5204	-2.94723	2.2553	-1.3068	0.19128	0.279125	6.98097	32.1243	62.582	221.61	100.582	0	11.6329	0	13.4574	17.855	10.5896	125.916	56.8525	19.1033	Nontarget	5.88166
Arvcf	231.59	1.21644	0.224357	5.42189	5.89705e-08	2.76467e-07	120.422	539.687	107.854	82.5604	96.2406	560.642	97.3492	76.3507	121.116	608.061	117.662	108.966	297.311	308.04	Nontarget	39.8701
AA414768	96.612	1.04876	0.504898	2.07717	0.0377862	0.0694998	185.577	11.9319	151.795	54.3161	207.677	7.32866	194.698	92.1474	202.982	6.94361	150.608	62.9582	15.8441	7.76071	Nontarget	5.66774
Abhd10	85.8283	2.104	1.00076	2.1024	0.0355179	0.066011	69.2279	142.265	101.196	0	91.8989	149.321	93.0634	5.26557	80.1836	123.993	82.952	94.4373	84.8128	82.9799	Nontarget	40.4144
Cp	78.4411	-1.42783	0.563305	-2.53474	0.011253	0.0236388	136.129	14.6854	91.8757	158.603	106.371	12.8251	55.1033	118.475	96.4446	3.96777	84.7169	184.032	15.8441	19.1033	Nontarget	2.70489
Ednrb	28.2041	-1.73618	0.680543	-2.55117	0.0107363	0.0226716	37.8136	9.17836	18.6415	73.8698	20.2612	3.66433	25.7149	63.1868	30.2791	3.96777	22.3558	72.6441	3.72803	9.55164	Nontarget	1.5957
Epc1	378.766	0.666054	0.178957	3.72186	0.000197762	0.000589505	329.851	467.178	402.123	473.636	374.108	487.356	361.233	368.59	366.153	452.326	339.456	339.006	287.991	253.715	Nontarget	80.6174
Setmar	24.7667	0.532798	0.632175	0.842801	0.39934	0.506912	11.6349	55.988	15.9784	10.8632	13.7487	30.2307	17.1433	2.63278	16.8217	42.6536	14.7078	12.1073	56.8525	45.3703	Nontarget	20.3515
Whrn	99.3523	-0.61028	0.297575	-2.05084	0.0402824	0.0735506	100.061	74.3447	111.849	143.394	77.4266	68.7061	96.1247	202.724	97.0053	52.573	85.8935	171.924	52.1925	56.7129	Nontarget	10.9609
Fgf12	21.9109	-1.55311	0.585669	-2.65185	0.00800525	0.0174347	12.7984	20.1924	27.9622	23.8991	18.814	18.3216	17.7555	42.1245	17.9432	7.93555	17.061	29.0576	24.2322	28.6549	Nontarget	5.40862
Acy1	48.6075	1.44457	0.513706	2.81205	0.00492262	0.0112459	30.2508	95.4549	17.3099	32.5896	30.3918	118.175	25.7149	2.63278	33.0827	109.114	29.4156	7.26441	72.6967	76.4131	Nontarget	35.6172
Ahsg	10.7488	-0.489365	1.14566	-0.427145	0.669274	0.750427	9.30795	8.26052	0	0	15.9195	11.9091	11.6329	18.4295	7.85014	16.863	7.05974	9.68588	18.6402	14.9244	Nontarget	7.93848
Asap1	949.981	2.29611	0.1754	13.0907	3.71982e-39	1.80275e-37	841.206	1606.21	757.642	419.32	915.371	1818.42	822.264	516.026	873.048	2119.78	796.574	414.071	682.23	717.567	Nontarget	72.4633
Vps13d	978.567	-0.437216	0.193475	-2.2598	0.0238337	0.0463963	1207.13	493.796	1087.86	1236.23	1093.38	683.397	1035.33	1337.45	1125.37	700.312	1085.44	1067.87	842.536	703.837	Nontarget	29.1331
Cited1	182.626	2.88911	0.394433	7.32472	2.39395e-13	1.94028e-12	318.797	31.2064	404.786	139.049	329.968	32.0629	303.681	107.944	333.07	37.6939	312.394	186.453	6.52406	13.1335	Nontarget	9.43313
Syt6	4.22331	-2.30413	1.51053	-1.52538	0.127164	0.198575	3.49048	7.34269	0	2.17264	2.17084	3.66433	0	0	1.68217	5.95166	0.588312	7.26441	15.8441	8.95466	Nontarget	3.02831
Fthl17-ps1	13.9536	0.186332	2.14278	0.0869582	0.930705	0.951489	2.32699	22.9459	0	0	7.95975	14.6573	0	0	2.2429	0	4.11818	0	58.7166	82.3829	Nontarget	72.8131
Bmpr1b	44.3082	-1.66457	0.463682	-3.5899	0.000330807	0.000950108	44.7945	42.2204	22.6361	47.7981	32.5626	26.5664	23.2659	55.2884	31.4006	48.6052	36.4753	36.322	87.6088	84.7708	Nontarget	11.2007
Zbtb24	105.731	2.30346	0.319667	7.2058	5.77049e-13	4.50677e-12	116.931	122.99	121.169	39.1076	149.064	148.405	128.574	86.8818	120.556	158.711	110.603	55.6938	62.4446	59.1008	Nontarget	16.8051
Ank1	13.0451	2.00591	0.882392	2.27327	0.02301	0.0449803	14.5437	19.2746	13.3153	0	9.40698	18.3216	12.8574	13.1639	12.3359	25.7905	11.1779	0	20.5042	11.9396	Nontarget	1.59425
Grip1	68.1548	-0.48378	0.441372	-1.09608	0.273043	0.373306	83.1898	34.8778	79.892	73.8698	62.9544	22.902	64.2872	179.029	83.5479	34.718	74.1273	106.545	27.9603	26.267	Nontarget	3.46685
Adck1	71.7784	0.797712	0.359257	2.22045	0.0263884	0.0507973	44.7945	134.004	38.6144	17.3811	44.864	131.916	44.0827	60.554	43.1758	166.647	45.8883	36.322	105.317	91.3376	Nontarget	22.577
Mea1	15.3517	1.76944	3.96078	0.446739	0.655063	0.738947	0	50.481	0	0	63.678	18.3216	0	7.89835	0	8.92749	1.76494	0	29.8243	34.0277	Nontarget	29.7915
Retreg1	58.9348	-2.677	0.554283	-4.82966	1.36765e-06	5.45672e-06	53.5207	22.0281	61.2505	197.71	47.7585	19.2377	44.0827	65.8196	61.1189	21.8228	35.887	75.0655	70.8327	48.9522	Nontarget	14.293
Mphosph9	91.269	-0.241915	2.81697	-0.0858776	0.931564	0.952073	9.8897	0	151.795	0	257.606	163.063	22.6536	0	34.7649	85.3072	49.4182	142.867	208.77	151.632	Nontarget	14.9454
Tpm2	422.78	4.22852	0.583306	7.24924	4.1911e-13	3.32991e-12	637.595	36.7134	525.955	147.74	997.139	48.5523	860.224	381.754	948.185	51.5811	868.348	401.964	8.38808	4.77582	Nontarget	1.72554
Rad51d	61.0158	-0.766327	0.803759	-0.953429	0.340373	0.445916	62.2469	61.495	66.5766	8.69057	63.678	53.1328	69.1853	89.5146	64.4833	11.9033	64.7143	70.2226	99.7249	68.6524	Nontarget	7.77753
Snap91	21.4335	0.145883	0.681867	0.213947	0.830589	0.87944	6.98097	44.974	11.9838	19.5538	8.68336	41.2237	10.4084	0	6.72869	51.5811	8.82468	4.84294	48.4645	35.8187	Nontarget	8.00098
Prnp	788.021	-4.7666	0.715783	-6.65927	2.75187e-11	1.82055e-10	674.827	284.529	533.945	2029.25	390.751	48.5523	380.825	1737.64	607.264	83.3233	534.187	1477.1	1182.72	1067.4	Nontarget	190.529
Gm44504	49.5353	0.159244	0.413544	0.385071	0.700185	0.776178	27.3421	75.2625	37.2829	56.4887	41.246	76.0348	50.2053	23.695	35.3256	74.3958	32.3571	48.4294	58.7166	56.7129	Nontarget	38.7451
Ndufv2	242.248	1.4746	0.284006	5.19214	2.07888e-07	9.13711e-07	270.512	255.158	268.97	108.632	393.646	285.818	318.987	142.17	276.437	211.284	297.686	164.66	180.81	216.703	Nontarget	94.2355
Rtl5	11.0775	0.158286	0.841621	0.188073	0.850819	0.895476	13.3802	10.0962	15.9784	2.17264	13.025	5.49649	16.531	13.1639	13.4574	2.97583	18.2377	12.1073	6.52406	11.9396	Nontarget	1.29576
Psme2b	109.928	3.12314	0.429535	7.27099	3.56858e-13	2.85452e-12	127.984	213.856	93.2073	26.0717	89.0045	235.433	115.105	60.554	95.3231	167.638	147.078	26.6362	58.7166	82.3829	Nontarget	55.7713
Slc25a44	113.719	-0.320624	0.281259	-1.13996	0.254303	0.352362	118.095	67.002	133.153	147.74	150.512	57.7132	143.269	168.498	111.584	70.428	149.431	125.916	78.2887	70.4433	Nontarget	12.8477
Specc1	432.789	-0.150825	0.225075	-0.670112	0.502787	0.606013	270.512	602.1	268.97	378.04	257.606	682.481	240.618	458.104	336.435	820.337	278.86	491.558	519.129	454.3	Nontarget	45.594
Pcsk7	72.166	-1.51949	0.492187	-3.08723	0.00202033	0.00497956	83.7716	54.1523	67.9082	112.977	59.3363	29.3146	44.0827	152.701	59.4368	43.6455	70.5974	104.123	89.4728	38.8035	Nontarget	9.13876
Crtam	15.7633	-0.370097	0.751897	-0.492218	0.622565	0.712358	4.07223	31.2064	3.9946	10.8632	6.51252	27.4825	8.57163	5.26557	7.85014	32.7341	4.70649	2.42147	32.6203	42.3854	Nontarget	15.0458
Glrb	6.63683	-2.32027	1.17679	-1.97169	0.0486447	0.0870025	5.81747	2.75351	6.65766	8.69057	2.89445	8.24474	5.51033	15.7967	1.68217	6.94361	0.588312	2.42147	11.1841	13.7305	Nontarget	2.94625
Rbl2	279.9	1.34796	0.29303	4.60006	4.22364e-06	1.58961e-05	449.109	36.7134	535.276	291.134	468.178	29.3146	469.603	218.521	564.649	43.6455	494.77	261.519	31.6883	24.4761	Nontarget	3.93881
Tekt1	10.915	1.44151	0.940863	1.53211	0.125495	0.196274	1.74524	31.2064	5.32613	8.69057	6.51252	26.5664	7.95937	0	2.80362	29.7583	5.88312	9.68588	6.52406	10.1486	Nontarget	4.03611
P2ry1	5.68488	-1.74208	1.25886	-1.38386	0.166402	0.248685	5.81747	4.58918	1.33153	19.5538	0.723613	5.49649	3.0613	0	2.2429	9.91944	4.70649	7.26441	6.52406	8.35769	Nontarget	1.52893
Prr3	158.603	0.698668	0.298083	2.34387	0.0190847	0.038013	182.087	147.772	167.773	108.632	217.808	130.084	198.372	89.5146	209.711	141.848	178.258	193.718	136.073	118.799	Nontarget	55.3159
Sh3glb1	478.077	0.547403	0.202924	2.69757	0.00698471	0.0154338	520.082	394.669	531.282	451.91	666.448	350.859	699.812	489.698	550.07	345.196	627.729	394.699	332.727	337.889	Nontarget	66.3877
Ddx46	6226.56	-1.98376	0.214132	-9.26417	1.96592e-20	2.91641e-19	1898.24	2385.46	1543.25	18682.6	1842.32	2733.59	1679.43	19780.1	1901.42	3031.38	1752.58	28229.5	881.68	830.396	Nontarget	102.921
Deaf1	195.304	-0.405614	0.356584	-1.1375	0.255329	0.353457	154.163	191.828	211.714	238.991	151.959	178.636	198.372	434.409	171.582	157.719	173.552	181.61	141.665	148.05	Nontarget	44.7599
Gtf2a2	191.635	0.994113	0.300185	3.31167	0.000927401	0.00244554	272.258	46.8096	330.22	149.912	337.928	50.3845	387.56	113.21	301.109	42.6536	365.93	179.189	54.9885	50.7431	Nontarget	51.2401
Wac	875.17	0.867317	0.154245	5.623	1.87674e-08	9.29147e-08	1050.64	623.211	1161.1	677.864	1065.16	727.369	1250.85	839.858	1063.13	709.24	1174.27	818.457	539.633	551.607	Nontarget	77.487
Tjp3	14.5184	-0.544935	1.18355	-0.460423	0.645213	0.73143	12.7984	33.0421	3.9946	4.34528	4.34168	26.5664	4.28582	47.3901	5.04652	23.8066	7.05974	0	18.6402	11.9396	Nontarget	3.21843
Mtif2	294.063	0.437017	0.261348	1.67216	0.0944918	0.153986	277.493	289.118	246.334	315.033	354.571	373.761	287.762	413.347	287.652	319.406	268.27	259.097	235.798	189.242	Nontarget	55.727
Brpf1	352.365	1.1931	0.156072	7.64454	2.09702e-14	1.8672e-13	363.592	429.547	372.829	234.645	363.978	501.097	350.212	229.052	368.396	498.948	340.044	268.783	299.175	312.816	Nontarget	38.5605
Gm15816	7.56233	-1.93301	1.45633	-1.32732	0.184404	0.270862	1.74524	10.0962	2.66307	6.51793	2.89445	10.0769	4.89807	39.4917	0	12.8953	1.76494	0	7.45607	5.3728	Nontarget	2.79992
Magoh	421.676	3.26703	0.225572	14.4833	1.54506e-47	1.15537e-45	474.706	604.854	452.721	115.15	555.012	612.859	582.259	97.413	517.548	637.82	558.896	184.032	268.419	241.776	Nontarget	443.248
Fancc	83.8087	-1.46329	0.419088	-3.49161	0.000480116	0.00133711	29.6691	131.251	47.9352	82.5604	34.0098	107.182	48.3685	134.272	31.4006	132.92	43.5351	48.4294	160.306	141.484	Nontarget	31.2637
Pcnt	960.642	2.04222	0.268469	7.6069	2.80749e-14	2.4758e-13	1390.38	695.72	1254.3	751.734	1134.63	1146.02	1038.39	800.366	1271.72	1296.47	1150.15	704.648	400.764	413.705	Nontarget	24.3297
Cobl	99.5066	2.24578	0.319105	7.03774	1.9538e-12	1.45378e-11	94.8248	155.114	87.8812	45.6255	114.331	165.811	97.9615	94.7802	109.902	172.598	94.1299	50.8509	46.6004	62.6826	Nontarget	6.12852
Dnmt3l	51.8826	1.57578	0.475809	3.3118	0.000926984	0.00244483	21.5246	122.072	14.6469	28.2443	23.1556	162.146	23.8781	18.4295	26.9148	154.743	14.7078	14.5288	57.7845	43.5794	Nontarget	20.9222
Agtpbp1	279.564	-0.790227	0.192622	-4.10247	4.08758e-05	0.000134995	191.977	297.379	229.024	328.069	221.426	327.957	236.332	223.787	224.29	280.72	236.501	302.684	405.424	408.333	Nontarget	70.1534
Tmem201	168.108	-2.56855	0.321969	-7.97765	1.49145e-15	1.48124e-14	94.243	190.91	101.196	280.271	75.9794	129.168	69.1853	239.583	82.4265	170.614	67.0675	154.974	335.523	362.365	Nontarget	57.6115
Shisa5	25.8575	-3.31252	0.707011	-4.68525	2.79621e-06	1.07415e-05	19.1977	15.6032	25.2991	76.0425	13.025	4.58041	17.1433	68.4524	11.7752	8.92749	19.4143	21.7932	34.4843	26.267	Nontarget	12.0194
3830406C13Rik	86.1569	0.172883	0.446748	0.386981	0.69877	0.775338	121.003	37.6313	69.2397	80.3878	147.617	27.4825	153.065	60.554	151.956	28.7664	135.312	104.123	48.4645	40.5945	Nontarget	14.14
Vps25	66.1306	0.479289	0.354298	1.35279	0.176124	0.260412	65.1557	57.8237	69.2397	49.9708	69.4669	60.4614	83.8795	18.4295	77.9407	74.3958	80.0104	53.2723	79.2207	86.5617	Nontarget	60.381
Smtn	133.321	0.917527	0.377736	2.42901	0.0151399	0.0308892	161.726	54.1523	194.404	91.251	238.069	54.0488	192.249	207.99	183.918	48.6052	230.03	133.181	34.4843	42.3854	Nontarget	6.41226
Cask	170.679	-0.187091	0.41221	-0.453874	0.649919	0.73485	219.319	58.7415	268.97	360.659	204.059	87.9439	184.29	134.272	210.272	54.5569	228.853	242.147	66.1726	69.2494	Nontarget	5.29066
Cmah	255.305	-3.91015	1.14121	-3.42631	0.000611839	0.0016677	308.326	117.483	139.811	825.604	179.456	10.0769	104.696	331.731	270.269	10.9114	246.503	508.509	274.943	245.955	Nontarget	19.2222
Esd	422.851	1.93323	0.17877	10.8141	2.95324e-27	6.87399e-26	410.132	607.607	427.422	156.43	424.761	695.306	450.623	160.6	380.171	687.417	464.178	208.246	431.52	415.496	Nontarget	139.38
Tcf24	54.5485	-0.199928	0.414085	-0.482818	0.629225	0.717935	31.4143	69.7555	50.5982	32.5896	34.7334	66.874	37.9601	52.6557	58.876	82.3313	38.2403	43.5864	81.0848	82.9799	Nontarget	16.2122
Eef1d	738.727	1.30625	0.206819	6.31592	2.68557e-10	1.60862e-09	617.234	1084.88	543.265	397.594	644.016	1202.82	741.446	326.465	675.112	1339.12	701.268	491.558	766.111	811.292	Nontarget	276.606
Rbfox3	19.6601	1.56993	0.754284	2.08135	0.0374018	0.0689538	9.30795	26.6172	14.6469	21.7264	21.7084	43.0558	17.7555	0	12.8967	48.6052	11.7662	19.3718	15.8441	11.9396	Nontarget	2.52943
Mapt	17.0988	0.103698	0.69506	0.149193	0.881401	0.916449	11.6349	17.4389	15.9784	13.0359	26.7737	19.2377	9.18389	18.4295	22.9897	15.8711	17.061	14.5288	20.5042	16.7154	Nontarget	2.31642
Fmn1	101.585	-0.851479	0.389071	-2.18849	0.0286336	0.0545411	82.0263	97.2906	74.5658	93.4236	71.6377	103.517	88.1653	68.4524	74.0156	121.017	92.3649	186.453	152.849	116.411	Nontarget	7.63243
Carf	89.4257	-0.473798	0.282279	-1.67847	0.0932546	0.15227	82.0263	70.6734	95.8703	99.9415	94.0698	65.0418	105.309	60.554	103.734	72.4119	92.3649	94.4373	114.637	100.889	Nontarget	14.9434
Htr1d	9.5979	-0.964123	0.834255	-1.15567	0.247816	0.344848	6.39922	14.6854	6.65766	13.0359	11.5778	3.66433	7.34711	18.4295	7.28942	7.93555	8.82468	7.26441	9.32009	11.9396	Nontarget	2.51711
Mknk1	62.6889	-0.287733	0.377879	-0.761442	0.446393	0.553337	60.5017	76.1804	42.609	89.0783	60.0599	66.874	58.1646	31.5934	52.1474	72.4119	50.5948	62.9582	87.6088	66.8615	Nontarget	19.9142
Gnb1l	26.3055	-2.75415	0.703863	-3.9129	9.1194e-05	0.000285701	11.6349	24.7816	22.6361	34.7623	15.1959	21.986	17.7555	57.9212	20.1861	9.91944	5.29481	31.4791	55.9205	38.8035	Nontarget	7.56841
Arhgap9	10.6343	-2.0792	0.73385	-2.83327	0.0046074	0.0105782	6.98097	11.014	10.6523	13.0359	8.68336	6.41257	6.73485	21.0623	5.60724	5.95166	5.29481	21.7932	14.9121	10.7456	Nontarget	4.40032
B4galt4	50.2431	-1.9327	0.643069	-3.00543	0.00265206	0.00639824	74.4636	27.5351	33.2883	128.186	18.0903	25.6503	41.0214	89.5146	40.3721	31.7422	45.3	43.5864	50.3285	54.325	Nontarget	15.473
Zbtb20	228.376	-0.092495	0.24261	-0.38125	0.703017	0.778378	254.805	105.551	263.643	299.825	250.37	110.846	244.904	487.065	228.215	130.937	256.504	409.228	80.1528	75.2192	Nontarget	15.0065
Tmem53	7.77491	-3.08534	1.21102	-2.54773	0.0108426	0.0228668	2.90874	3.67134	2.66307	21.7264	7.95975	9.16082	1.22452	2.63278	2.2429	8.92749	1.76494	2.42147	24.2322	17.3123	Nontarget	15.555
Snrpa	282.79	1.12971	0.284776	3.96701	7.27799e-05	0.000231078	221.064	414.862	271.633	202.056	268.461	474.53	302.456	160.6	265.783	453.318	175.905	140.445	279.603	328.338	Nontarget	158.496
Ppil3	79.1128	1.34906	0.312165	4.32161	1.54892e-05	5.42205e-05	64.5739	121.154	65.2451	47.7981	78.8739	121.839	85.7163	42.1245	67.2869	129.945	76.4805	33.9006	86.6768	85.9648	Nontarget	67.401
Nox4	16.5471	-2.74117	0.796979	-3.43946	0.000582881	0.00159508	10.4714	18.3567	11.9838	34.7623	4.34168	9.16082	12.2452	5.26557	5.04652	15.8711	6.47143	26.6362	38.2124	32.8338	Nontarget	7.23196
Osgepl1	30.6843	6.14101	2.60374	2.35853	0.0183474	0.0367482	48.285	48.6453	0	0	32.5626	63.2097	20.2046	0	17.9432	106.138	0	0	16.7762	75.8161	Nontarget	19.8855
Paqr7	204.739	-4.03434	0.61538	-6.55585	5.5327e-11	3.54668e-10	163.471	46.8096	107.854	895.129	104.2	10.0769	66.7363	687.156	127.284	14.8792	91.7766	421.336	63.3766	66.2645	Nontarget	9.91721
Matk	13.8398	-0.254717	0.733475	-0.347275	0.728385	0.798406	7.56271	19.2746	6.65766	28.2443	5.78891	20.1538	8.57163	13.1639	12.3359	31.7422	5.88312	7.26441	13.9801	13.1335	Nontarget	4.70605
Zmym6	107.436	1.18103	0.886853	1.33171	0.182956	0.269189	49.4485	172.553	74.5658	71.6972	117.949	207.951	104.084	97.413	51.5866	175.574	127.075	0	134.209	119.992	Nontarget	17.1579
Med15	309.121	1.38776	0.218139	6.3618	1.99404e-10	1.2093e-09	245.497	466.261	303.589	228.127	264.119	521.251	246.74	226.419	254.008	542.593	297.686	336.584	188.266	206.554	Nontarget	35.6517
Vps8	425.043	1.62363	0.224966	7.21721	5.30661e-13	4.1602e-12	328.105	742.529	290.274	186.847	301.747	955.473	264.496	226.419	307.277	1017.73	292.391	292.998	370.007	374.305	Nontarget	48.1588
Calr4	69.0303	0.720296	0.585982	1.22921	0.218992	0.31215	108.205	3.67134	91.8757	54.3161	114.331	12.8251	127.35	110.577	134.013	9.91944	94.7182	89.5944	10.2521	4.77582	Nontarget	2.61291
Ubxn10	59.5262	-1.15709	0.445358	-2.59812	0.00937369	0.0201155	19.1977	101.88	35.9514	30.417	34.0098	95.2725	22.6536	42.1245	34.7649	79.3555	25.8857	77.487	115.569	118.799	Nontarget	24.6001
Fyb2	67.821	1.99078	0.962066	2.06928	0.0385201	0.0707157	127.403	17.4389	111.849	117.323	96.9642	16.4895	77.1447	0	160.367	27.7744	105.896	72.6441	7.45607	10.7456	Nontarget	2.08883
Podn	17.2212	-3.21244	0.781468	-4.11078	3.94327e-05	0.000130594	12.2167	4.58918	5.32613	34.7623	5.06529	5.49649	6.73485	78.9835	7.85014	8.92749	7.64805	46.0079	12.1161	5.3728	Nontarget	1.79166
Plekhg5	207.35	0.857631	1.36282	0.629306	0.529149	0.631114	269.931	122.072	268.97	195.538	172.22	354.524	209.393	0	215.879	210.292	242.384	259.097	112.773	269.834	Nontarget	30.8505
Tubgcp2	141.831	1.13619	0.241633	4.70214	2.57452e-06	9.93843e-06	151.254	160.621	173.099	95.5963	159.919	177.72	162.249	78.9835	135.695	170.614	155.314	130.759	109.045	124.768	Nontarget	24.9687
Dlk2	7.61456	-2.99396	1.05134	-2.84775	0.00440294	0.0101553	1.16349	6.42485	2.66307	8.69057	0	7.32866	2.44904	18.4295	3.92507	17.855	1.17662	12.1073	13.0481	11.3426	Nontarget	5.41658
Dhx32	402.444	1.89851	0.229279	8.28032	1.22849e-16	1.34808e-15	574.766	361.627	608.51	341.105	533.303	341.699	519.196	186.928	622.404	360.076	540.07	213.089	208.77	222.673	Nontarget	46.3094
Stx2	171.604	0.475859	0.241229	1.97264	0.0485362	0.0868365	145.437	266.172	129.159	117.323	159.195	262.916	145.105	155.334	160.928	227.155	115.897	121.073	191.994	204.763	Nontarget	45.6192
Klc3	50.1137	-0.021754	0.424334	-0.0512661	0.959113	0.971976	24.4334	105.551	26.6307	26.0717	20.2612	94.3564	22.0413	36.859	19.6253	123.993	14.7078	19.3718	74.5607	93.1285	Nontarget	27.2139
Anks1	282.15	0.614821	0.181737	3.38302	0.000716923	0.00192962	218.737	461.671	194.404	184.675	207.677	484.607	184.29	229.052	209.15	541.601	194.731	227.618	288.923	322.965	Nontarget	27.1596
Ripor2	88.5594	0.67492	0.382333	1.76527	0.0775191	0.130085	79.1176	66.0842	85.2181	84.733	102.03	66.874	103.472	105.311	103.173	79.3555	115.309	176.767	41.9404	30.4459	Nontarget	5.23204
Lbhd1	20.8763	3.83256	1.05942	3.6176	0.000297344	0.000861635	31.4143	30.2886	15.9784	15.2085	30.3918	4.58041	54.4911	0	38.69	19.8389	34.1221	4.84294	4.66004	7.76071	Nontarget	3.95232
Nadk2	275.361	1.41641	0.182285	7.77031	7.82956e-15	7.28965e-14	240.843	399.259	264.975	173.811	280.038	392.083	304.293	213.255	274.194	412.649	275.33	213.089	195.722	215.509	Nontarget	53.7855
Pard6a	14.6234	-1.23449	0.980844	-1.2586	0.208175	0.299287	5.23572	19.2746	7.9892	4.34528	9.40698	28.3985	2.44904	36.859	3.92507	29.7583	5.88312	2.42147	26.0962	22.6851	Nontarget	14.1897
Trim9	34.3711	-1.17502	0.489325	-2.40131	0.0163367	0.0330939	23.2699	32.1243	34.6198	41.2802	33.2862	27.4825	23.8781	42.1245	28.0362	17.855	44.7117	50.8509	42.8724	38.8035	Nontarget	5.79905
Zfp821	136.14	0.106463	0.262202	0.406034	0.684718	0.763097	142.528	151.443	97.2019	175.984	137.487	145.657	137.146	136.905	146.91	146.808	111.191	140.445	125.821	110.441	Nontarget	39.6268
Fut10	146.259	-1.38222	0.313765	-4.40529	1.05643e-05	3.78384e-05	115.186	147.772	154.458	202.056	117.225	134.664	91.8389	142.17	85.7908	130.937	100.013	130.759	255.37	239.388	Nontarget	49.9352
Daam1	320.902	1.88112	0.360532	5.21764	1.81221e-07	8.01838e-07	536.953	389.162	331.552	171.639	357.465	324.293	291.435	118.475	400.918	529.698	325.336	186.453	289.855	239.388	Nontarget	29.8738
Tex264	59.4516	-4.26737	0.470439	-9.07103	1.17897e-19	1.64977e-18	17.4524	26.6172	31.9568	106.459	13.025	41.2237	35.511	118.475	20.1861	31.7422	21.1792	82.33	150.053	136.111	Nontarget	56.8466
Nrap	19.5838	0.251583	0.619774	0.405927	0.684796	0.763111	19.1977	21.1102	13.3153	30.417	13.7487	25.6503	24.4904	34.2262	16.261	23.8066	15.2961	9.68588	10.2521	16.7154	Nontarget	1.4941
Fam131b	15.7693	-1.16004	0.616982	-1.88018	0.0600831	0.104389	6.98097	16.521	7.9892	10.8632	7.95975	21.0699	9.18389	15.7967	11.2145	23.8066	10.5896	9.68588	34.4843	34.6247	Nontarget	5.00888
Xndc1	96.2189	0.79765	0.286549	2.78364	0.0053753	0.0121877	67.4827	156.95	78.5604	58.6613	60.7835	163.063	80.206	34.2262	80.7443	168.63	71.1857	58.1153	132.345	136.111	Nontarget	25.9931
Pacsin1	122.412	2.03733	0.432429	4.71137	2.46061e-06	9.52095e-06	77.3724	265.255	47.9352	32.5896	76.703	364.601	70.4098	23.695	80.7443	314.446	51.1831	79.9085	113.705	115.217	Nontarget	15.2056
Tiam2	36.2704	1.14002	0.488441	2.334	0.0195957	0.0388996	53.5207	34.8778	31.9568	41.2802	36.9043	43.0558	30.0007	31.5934	51.5866	43.6455	38.8286	24.2147	24.2322	22.0882	Nontarget	3.70864
Magi1	215.03	0.26876	0.373725	0.719139	0.472055	0.577737	153.581	342.353	159.784	162.948	157.024	307.804	164.085	276.442	168.217	376.939	141.783	82.33	277.739	239.388	Nontarget	23.995
Camk2a	27.5891	-4.459	0.698732	-6.38156	1.75295e-10	1.06819e-09	3.49048	13.7675	9.32073	49.9708	7.95975	8.24474	7.34711	100.046	6.16797	5.95166	10.5896	130.759	17.7082	14.9244	Nontarget	2.44056
Mkks	93.7198	-0.20839	0.333318	-0.6252	0.53184	0.633563	68.0644	128.497	65.2451	93.4236	63.678	127.335	93.6757	78.9835	77.9407	102.17	81.187	43.5864	150.985	137.305	Nontarget	32.7551
Dram2	55.9069	-4.37238	0.425045	-10.2869	8.07573e-25	1.61573e-23	34.9048	14.6854	43.9406	149.912	39.0751	11.9091	38.5723	100.046	47.6616	9.91944	31.7688	82.33	93.2009	84.7708	Nontarget	29.25
Npnt	23.5393	-0.41623	0.727821	-0.571885	0.5674	0.663895	16.8707	26.6172	13.3153	13.0359	10.1306	41.2237	9.79615	65.8196	14.5788	48.6052	11.7662	14.5288	22.3682	20.8942	Nontarget	3.28397
Nup98	930.643	0.780107	0.17127	4.55485	5.24233e-06	1.94729e-05	676.572	1401.54	696.392	647.447	694.669	1891.71	592.667	692.422	626.329	1805.34	681.265	605.367	1000.05	1017.25	Nontarget	126.369
Alpl	49.3058	-2.56377	0.531266	-4.82576	1.39468e-06	5.55517e-06	43.631	41.3026	39.946	86.9057	25.3265	31.1468	23.2659	57.9212	17.9432	42.6536	26.474	33.9006	103.453	116.411	Nontarget	26.9172
Kif14	191.132	1.36607	0.30914	4.41896	9.9178e-06	3.56695e-05	128.566	268.926	150.463	82.5604	176.562	316.048	184.29	76.3507	144.667	352.14	218.852	92.0158	234.866	249.537	Nontarget	19.179
Rpl34	1339.08	-0.416219	0.351864	-1.1829	0.23685	0.332952	959.301	1496.07	1259.63	1549.09	1330	1384.2	1504.93	637.134	1185.93	1076.26	1273.11	1271.27	1981.45	1838.69	Nontarget	5108.49
Adh5	296.767	1.78029	0.209899	8.48163	2.22054e-17	2.60444e-16	317.634	405.683	319.568	121.668	306.089	482.775	300.619	139.538	262.98	415.624	347.692	125.916	320.611	288.34	Nontarget	148.283
Atg9a	40.676	-3.27519	1.9869	-1.64839	0.0992725	0.160542	40.7223	24.7816	43.9406	147.74	25.3265	23.8181	0	0	6.72869	21.8228	24.7091	33.9006	72.6967	103.277	Nontarget	12.9843
Cipc	67.4993	-1.03568	1.59833	-0.647974	0.517002	0.619623	143.692	22.0281	9.32073	17.3811	122.291	71.4544	12.8574	113.21	5.04652	60.5086	84.1286	130.759	78.2887	74.0252	Nontarget	11.5599
Mme	378.121	0.572288	0.425525	1.3449	0.178658	0.263616	585.238	57.8237	615.168	806.05	473.243	32.9789	407.765	729.281	469.326	20.8308	432.997	627.161	23.3002	12.5365	Nontarget	2.27094
Cd84	53.8194	-3.91778	0.933254	-4.19798	2.6931e-05	9.13133e-05	49.4485	22.9459	37.2829	123.841	44.1404	0	14.082	129.006	47.6616	3.96777	47.6533	152.553	45.6684	35.2217	Nontarget	8.43035
Erbin	928.894	0.606322	0.187861	3.22751	0.00124874	0.00320745	1564.9	295.543	1394.11	708.281	1487.75	340.782	1489.63	542.353	1418.07	415.624	1568.44	757.92	517.265	503.849	Nontarget	57.0785
Ispd	32.8576	0.444736	0.651651	0.682475	0.494939	0.598694	34.3231	23.8637	29.2937	63.0066	47.7585	23.8181	48.9807	23.695	38.69	22.8147	51.1831	7.26441	21.4362	23.8791	Nontarget	5.79817
Ankib1	550.246	0.0703926	0.143385	0.490935	0.623473	0.713144	625.96	445.15	580.548	662.656	567.313	450.712	631.239	597.642	588.2	482.085	655.968	518.194	454.82	442.957	Nontarget	45.2755
Cndp2	83.8426	1.23375	0.33565	3.67569	0.000237204	0.000698758	110.532	55.988	123.833	95.5963	107.818	45.8041	120.003	113.21	116.631	56.5408	89.4234	89.5944	19.5722	29.2519	Nontarget	7.14702
Hormad1	134.245	3.00866	0.410205	7.33454	2.22489e-13	1.81215e-12	172.197	262.501	134.485	54.3161	112.884	272.992	106.533	13.1639	125.042	231.123	106.484	19.3718	137.005	131.335	Nontarget	79.2539
St6galnac6	39.0643	-0.485201	0.505711	-0.959444	0.337335	0.44248	27.9239	15.6032	33.2883	110.805	23.1556	21.986	37.9601	78.9835	40.9329	26.7825	28.239	79.9085	11.1841	10.1486	Nontarget	2.85492
Mpv17l	308.014	-5.268	1.04563	-5.03812	4.70134e-07	1.98707e-06	205.357	88.1122	154.458	823.431	147.617	7.32866	145.105	734.547	217	5.95166	172.375	1099.35	280.535	231.03	Nontarget	64.5675
Sass6	71.8265	-0.407535	0.349174	-1.16714	0.243153	0.339904	58.7565	51.3988	58.5874	76.0425	71.6377	96.1886	60.6137	81.6163	64.4833	72.4119	75.3039	72.6441	89.4728	76.4131	Nontarget	13.4826
Spata7	44.0403	0.995462	0.55772	1.78488	0.0742809	0.125412	27.3421	52.3166	46.6036	47.7981	41.9696	49.4684	65.5117	10.5311	61.1189	51.5811	48.2416	36.322	41.9404	35.8187	Nontarget	14.6848
Zfp12	181.178	-0.250123	0.20494	-1.22047	0.222286	0.31601	194.304	155.114	162.447	178.157	186.692	156.65	195.923	155.334	184.478	151.767	221.794	188.875	203.178	201.778	Nontarget	24.1684
Brd8	722.536	0.937214	0.197398	4.74783	2.05607e-06	8.02706e-06	835.971	800.353	685.739	708.281	736.639	1038.84	642.872	592.376	709.316	975.081	711.857	510.93	575.049	592.202	Nontarget	90.4831
Zap70	8.34987	-0.134194	1.27131	-0.105555	0.915935	0.941867	2.90874	21.1102	3.9946	0	3.61807	21.986	4.28582	0	0	16.863	2.35325	14.5288	12.1161	13.1335	Nontarget	5.04879
St7	22.0138	-2.49611	0.664074	-3.75878	0.000170744	0.000513881	19.1977	13.7675	17.3099	76.0425	14.4723	5.49649	14.6942	60.554	9.53231	8.92749	11.7662	29.0576	13.0481	14.3275	Nontarget	5.03264
Fhod3	32.4554	1.02941	0.694879	1.48143	0.138493	0.213821	45.3763	43.1383	45.2721	10.8632	31.1154	32.0629	31.2252	55.2884	15.1396	38.6858	34.7104	33.9006	14.9121	22.6851	Nontarget	1.82473
Agbl3	28.7011	-0.519766	0.556464	-0.93405	0.350278	0.456774	32.5778	35.7956	33.2883	32.5896	28.9445	21.0699	30.613	31.5934	20.7468	17.855	24.7091	9.68588	44.7364	37.6096	Nontarget	19.0059
Resf1	594.479	-0.409328	0.206143	-1.98565	0.0470723	0.0844736	600.945	402.93	617.831	897.301	581.785	503.845	565.115	1111.03	532.688	451.334	585.37	697.383	402.628	372.514	Nontarget	46.057
Arhgap33	66.859	-0.574414	0.436961	-1.31457	0.188655	0.276026	29.0874	141.347	29.2937	47.7981	50.6529	93.4404	34.8988	102.679	26.354	120.025	30.5922	60.5367	85.7448	83.5769	Nontarget	11.1727
Kctd17	56.594	0.357321	0.483255	0.739404	0.459662	0.566007	77.9541	20.1924	63.9136	84.733	54.9946	20.1538	67.3485	97.413	77.9407	10.9114	96.4831	99.2802	10.2521	10.7456	Nontarget	4.33533
Fbxo41	146.689	-1.908	0.225884	-8.44681	2.99362e-17	3.45962e-16	56.4295	205.595	43.9406	102.114	52.1002	213.447	52.042	94.7802	58.3153	185.493	55.8896	94.4373	434.316	404.751	Nontarget	37.3777
Arntl2	13.4608	-1.76941	0.893975	-1.97926	0.0477863	0.0856247	8.14446	10.0962	2.66307	8.69057	4.34168	23.8181	3.0613	2.63278	10.093	16.863	4.11818	12.1073	46.6004	35.2217	Nontarget	12.2238
Sh3glb2	129.553	-0.283135	0.259761	-1.08998	0.27572	0.376126	66.9009	216.609	63.9136	73.8698	80.3211	226.272	91.8389	105.311	67.2869	203.348	77.0688	77.487	234.866	228.642	Nontarget	80.2966
Bcl2l1	359.938	0.96346	0.252849	3.81042	0.000138733	0.000423007	342.067	474.521	366.171	186.847	375.555	464.454	410.214	358.059	355.499	452.326	322.395	353.534	279.603	297.892	Nontarget	71.528
Mturn	57.6614	-1.99463	0.388939	-5.12837	2.92259e-07	1.26635e-06	73.3001	12.8497	53.2613	67.3519	73.085	19.2377	66.124	113.21	74.5763	16.863	61.1844	70.2226	54.0565	51.937	Nontarget	6.44178
Tgm6	10.8741	-4.77834	1.15207	-4.14762	3.35947e-05	0.000112318	5.23572	7.34269	0	15.2085	7.95975	4.58041	0	28.9606	2.2429	3.96777	2.94156	41.165	17.7082	14.9244	Nontarget	2.81802
Exoc1	310.569	1.27563	0.222894	5.72303	1.04642e-08	5.34069e-08	354.866	291.872	352.856	230.3	328.521	405.824	304.905	281.708	378.489	413.641	345.339	239.725	196.654	223.27	Nontarget	40.3246
Rufy3	354.268	0.553744	0.219565	2.52201	0.0116688	0.0244439	541.607	155.114	525.955	338.932	520.278	136.496	489.807	244.849	657.169	151.767	515.361	324.477	168.694	189.242	Nontarget	31.0218
Hadhb	476.345	0.66063	0.203508	3.24622	0.00116948	0.00302353	271.676	899.479	298.263	280.271	248.923	1051.66	240.006	179.029	245.597	993.928	266.505	176.767	786.615	730.104	Nontarget	265.302
Poln	20.4487	-3.26953	0.659581	-4.95697	7.15994e-07	2.96109e-06	5.81747	19.2746	11.9838	49.9708	6.51252	14.6573	10.4084	13.1639	5.04652	17.855	11.1779	43.5864	41.0084	35.8187	Nontarget	9.4593
Dgcr6	66.2425	0.235732	0.485532	0.485512	0.627313	0.716447	48.285	109.222	38.6144	67.3519	54.9946	88.8599	72.2466	73.7179	48.783	74.3958	64.7143	53.2723	94.1329	38.8035	Nontarget	34.0524
Eps15l1	380.743	-0.83904	0.228638	-3.66974	0.000242799	0.000714223	353.12	262.501	284.948	551.851	306.812	311.468	304.293	834.592	349.892	326.349	337.103	573.888	278.671	254.909	Nontarget	55.3898
Rora	140.597	0.0971761	0.313258	0.310211	0.7564	0.821036	144.273	115.647	157.121	136.876	169.326	109.93	146.33	215.888	146.349	145.816	146.49	99.2802	132.345	102.68	Nontarget	9.53034
Rorb	86.4097	-3.40649	0.659563	-5.16477	2.40736e-07	1.04943e-06	70.3914	27.5351	41.2775	334.587	70.1905	7.32866	59.3892	84.2491	67.2869	13.8872	89.4234	239.725	53.1245	51.3401	Nontarget	4.17453
Egr3	9.08905	-3.07197	1.30944	-2.34602	0.018975	0.0378265	6.98097	6.42485	2.66307	6.51793	5.06529	0	6.73485	39.4917	6.72869	9.91944	3.52987	2.42147	15.8441	14.9244	Nontarget	2.70228
2010111I01Rik	82.088	-3.59455	0.513464	-7.00059	2.5488e-12	1.86874e-11	43.631	51.3988	18.6415	204.228	29.6682	43.9719	17.1433	189.56	47.6616	57.5327	52.3597	154.974	128.617	109.844	Nontarget	12.5006
Pemt	19.4771	-4.02478	0.604667	-6.65618	2.81031e-11	1.85772e-10	7.56271	20.1924	3.9946	49.9708	4.34168	15.5734	6.12259	34.2262	7.85014	12.8953	2.35325	33.9006	37.2803	36.4156	Nontarget	40.373
Rbm4	76.368	-3.62377	0.881891	-4.10909	3.97217e-05	0.000131472	40.7223	11.014	53.2613	136.876	40.5224	36.6433	80.8182	44.7573	16.8217	29.7583	56.4779	348.692	90.4048	82.3829	Nontarget	34.2047
Nudt7	23.6031	-1.07415	0.562926	-1.90815	0.0563718	0.0988539	22.6881	22.9459	25.2991	39.1076	26.7737	14.6573	24.4904	10.5311	24.1111	10.9114	19.4143	26.6362	35.4163	27.461	Nontarget	14.7287
Ddit3	92.7284	2.29544	0.443932	5.1707	2.33213e-07	1.01879e-06	154.163	29.3707	131.822	84.733	158.471	22.902	210.617	44.7573	187.843	25.7905	147.078	75.0655	13.0481	12.5365	Nontarget	13.3629
Rcor3	134.333	1.2155	0.317902	3.82349	0.000131575	0.000402592	179.178	35.7956	194.404	143.394	201.165	41.2237	191.025	168.498	215.879	44.6375	208.262	217.932	19.5722	19.7003	Nontarget	4.90149
Samd15	10.7388	1.39908	1.00941	1.38603	0.165737	0.247871	18.0342	8.26052	14.6469	8.69057	4.34168	15.5734	4.89807	2.63278	15.7003	15.8711	15.2961	7.26441	8.38808	10.7456	Nontarget	3.38595
Ism2	6.08807	-3.566	0.989722	-3.60303	0.000314526	0.000907288	2.32699	8.26052	1.33153	10.8632	3.61807	3.66433	3.0613	10.5311	1.12145	3.96777	1.17662	7.26441	14.9121	13.1335	Nontarget	3.34086
Nrde2	274.851	1.32627	0.450309	2.94525	0.00322696	0.00765557	164.053	506.645	141.142	52.1434	217.084	657.747	185.515	121.108	163.731	653.691	138.253	215.511	334.591	296.698	Nontarget	50.9122
Rgs20	19.637	-5.33501	1.34226	-3.97465	7.04819e-05	0.000224083	5.81747	5.50702	0	84.733	13.025	3.66433	3.0613	23.695	1.68217	7.93555	0	99.2802	13.9801	12.5365	Nontarget	6.80539
Camk1d	140.084	-0.0548749	0.269676	-0.203485	0.838756	0.885818	128.566	138.593	109.186	145.567	134.592	161.23	153.065	129.006	145.788	163.671	115.309	84.7514	173.354	178.496	Nontarget	15.607
Hist1h2bc	113.369	-1.27296	0.401079	-3.17385	0.00150432	0.00380013	94.243	90.8657	114.512	149.912	114.331	87.0278	109.594	68.4524	85.2301	63.4844	115.309	205.825	137.937	150.438	Nontarget	621.93
Arhgef9	64.0202	-0.0936064	0.408235	-0.229295	0.818639	0.869742	77.9541	42.2204	51.9298	69.5246	71.6377	43.9719	77.1447	126.374	76.8192	30.7503	84.7169	72.6441	41.9404	28.6549	Nontarget	4.43082
Mybl1	95.5173	0.751719	0.378232	1.98746	0.0468718	0.084196	121.003	61.495	131.822	106.459	136.039	42.1398	159.8	39.4917	136.256	48.6052	155.903	92.0158	59.6486	46.5642	Nontarget	8.75525
Rdh13	123.737	0.300747	0.268564	1.11983	0.262785	0.361748	72.7184	188.156	101.196	132.531	88.2808	216.195	104.696	113.21	84.6694	201.365	82.952	84.7514	124.889	136.708	Nontarget	26.6468
Ftsj1	72.908	0.517923	0.353271	1.46608	0.142627	0.219036	45.958	120.236	50.5982	69.5246	62.9544	115.426	59.3892	39.4917	50.4652	114.074	67.6559	29.0576	93.2009	102.68	Nontarget	20.1899
Zscan22	59.4984	-0.940793	0.363322	-2.58942	0.00961376	0.0205427	40.1406	44.974	34.6198	102.114	52.1002	39.3915	56.9401	126.374	62.2404	45.6294	50.5948	101.702	39.1444	37.0126	Nontarget	7.18892
Relb	49.4199	1.31935	0.457852	2.88161	0.00395653	0.00921574	24.4334	118.401	21.3045	15.2085	16.6431	109.014	34.2865	21.0623	30.8398	124.985	31.1805	31.4791	58.7166	54.325	Nontarget	16.9412
Hdx	22.4744	-0.00700875	0.671971	-0.0104301	0.991678	0.994627	31.4143	16.521	42.609	10.8632	23.1556	15.5734	25.7149	26.3278	25.7933	4.95972	25.8857	36.322	13.9801	15.5214	Nontarget	2.7997
Hist1h2bp	15.1546	-2.16033	1.19818	-1.80302	0.0713856	0.121146	0	17.4389	0	6.51793	2.89445	27.4825	5.51033	50.0229	4.48579	27.7744	4.70649	46.0079	5.59205	13.7305	Nontarget	28.8446
Rnf185	106.831	-0.455039	0.524461	-0.867632	0.385596	0.493102	66.3192	174.389	106.523	123.841	115.055	118.175	54.4911	129.006	43.1758	163.671	45.8883	111.388	95.0649	148.647	Nontarget	23.6113
Dmac2	116.99	-0.335499	0.307581	-1.09077	0.275376	0.375778	65.1557	192.746	55.9244	65.1793	71.6377	174.972	91.2266	89.5146	85.7908	183.51	68.2442	123.495	183.606	186.854	Nontarget	65.1341
Zer1	247.398	0.144198	0.221522	0.650945	0.515082	0.617545	134.965	427.712	121.169	175.984	136.039	493.768	147.554	244.849	143.545	538.625	122.369	152.553	312.223	312.219	Nontarget	44.2261
Lrriq4	13.1033	0.836458	1.1012	0.759585	0.447503	0.554505	21.5246	15.6032	11.9838	2.17264	10.1306	28.3985	15.9187	18.4295	10.093	7.93555	4.70649	0	18.6402	17.9093	Nontarget	5.5548
Mid1	358.143	-3.03462	1.05723	-2.87034	0.00410026	0.00951697	211.174	96.3728	197.067	662.656	202.612	18.3216	203.27	629.235	552.874	340.237	226.5	658.64	507.013	508.028	Nontarget	111.129
BC024978	65.8536	-1.15282	0.461474	-2.49812	0.0124856	0.0259706	54.1025	52.3166	63.9136	117.323	60.7835	43.9719	85.104	34.2262	67.8476	32.7341	62.9494	94.4373	76.4247	75.8161	Nontarget	22.2898
Slc31a2	26.3237	-2.98676	0.645743	-4.6253	3.74048e-06	1.41973e-05	11.6349	11.9319	22.6361	47.7981	23.8792	7.32866	20.2046	89.5146	17.3825	2.97583	20.5909	58.1153	13.0481	21.4912	Nontarget	6.77838
Wdr31	29.3985	0.225734	0.502552	0.449176	0.653305	0.737366	19.7794	45.8918	23.9676	23.8991	26.0501	48.5523	16.531	7.89835	27.4755	37.6939	20.0026	21.7932	48.4645	43.5794	Nontarget	12.4632
Map3k10	181.843	-0.397943	0.270534	-1.47095	0.141304	0.217489	176.269	97.2906	139.811	280.271	200.441	113.594	220.413	265.911	196.814	142.84	212.381	283.312	115.569	100.889	Nontarget	18.2868
Nxt2	81.8447	0.208661	0.489002	0.426707	0.669593	0.750624	91.916	44.974	107.854	84.733	115.055	23.8181	174.494	89.5146	140.181	17.855	110.014	70.2226	29.8243	45.3703	Nontarget	12.1017
Acer2	39.638	-2.24449	0.443105	-5.06537	4.07613e-07	1.73569e-06	19.1977	37.6313	15.9784	86.9057	20.2612	32.9789	21.4291	55.2884	30.2791	24.7986	27.0623	96.8588	45.6684	40.5945	Nontarget	22.1166
Pja1	816.212	2.34526	0.187559	12.5041	7.08915e-36	2.80948e-34	1413.06	244.144	1367.48	551.851	1410.32	272.076	1292.48	792.468	1475.83	280.72	1411.95	697.383	119.297	97.9043	Nontarget	23.584
Ttc16	5.76157	-3.29248	1.05974	-3.10689	0.00189068	0.00468728	2.90874	3.67134	3.9946	19.5538	0.723613	6.41257	0.612259	10.5311	1.12145	5.95166	1.17662	12.1073	6.52406	5.3728	Nontarget	1.42601
Ralgps1	123.592	-2.65884	0.240467	-11.057	2.02732e-28	5.02301e-27	83.7716	86.2766	98.5334	219.437	77.4266	72.3705	65.5117	189.56	82.9872	82.3313	74.1273	203.403	204.11	190.436	Nontarget	19.6707
Kmt2b	962.465	0.550368	0.27366	2.01114	0.0443108	0.080057	781.286	1321.68	744.327	630.066	809.723	1509.7	653.893	1192.65	796.789	1780.54	668.322	801.506	821.1	962.925	Nontarget	59.2917
Pbx3	84.247	0.180093	0.378015	0.476417	0.633777	0.721734	109.368	51.3988	95.8703	112.977	103.477	42.1398	115.717	173.764	79.6228	39.6777	107.661	82.33	32.6203	32.8338	Nontarget	8.27669
Atp4a	12.7447	-0.580452	0.652354	-0.889782	0.373583	0.480716	7.56271	15.6032	10.6523	10.8632	7.95975	13.7412	12.2452	21.0623	10.093	17.855	7.05974	16.9503	13.0481	13.7305	Nontarget	2.18491
Dock7	1339.53	1.46677	0.203849	7.19537	6.22935e-13	4.84909e-12	1691.14	1200.53	1544.58	966.826	1505.12	1736.89	1331.66	1137.36	1617.13	1773.6	1548.44	1017.02	857.448	825.62	Nontarget	75.8182
Cd302	34.6738	-2.34452	0.637962	-3.67502	0.000237831	0.000700355	33.1596	16.521	14.6469	76.0425	37.6279	7.32866	41.6336	100.046	24.6719	3.96777	31.7688	60.5367	19.5722	17.9093	Nontarget	11.9667
Shroom2	170.347	1.40938	0.316786	4.44899	8.62768e-06	3.12198e-05	97.1518	356.12	101.196	52.1434	96.2406	356.356	83.2673	105.311	114.948	493.988	83.5403	94.4373	183.606	166.557	Nontarget	14.7587
Meaf6	60.1433	0.520873	1.25106	0.416344	0.677158	0.757204	106.46	82.6052	19.973	0	16.6431	46.7202	77.7569	92.1474	35.8864	95.2266	48.8299	154.974	30.7563	34.0277	Nontarget	4.66152
Slc25a14	33.2253	1.12034	0.449918	2.4901	0.0127707	0.026487	31.9961	53.2345	21.3045	23.8991	25.3265	56.7971	26.9394	18.4295	30.2791	51.5811	35.887	24.2147	35.4163	29.8489	Nontarget	15.9168
Ebf1	194.301	1.18564	0.552081	2.14758	0.0317469	0.0596734	205.938	23.8637	235.681	169.466	294.511	25.6503	326.334	484.432	312.884	17.855	317.1	288.155	11.1841	7.16373	Nontarget	1.37174
Suv39h1	272.357	0.273702	0.233053	1.17442	0.240229	0.336928	133.802	575.483	150.463	143.394	109.266	542.32	133.473	134.272	98.6875	633.852	130.605	121.073	428.724	477.582	Nontarget	90.9196
Sytl4	333.103	2.48773	0.392168	6.34353	2.24559e-10	1.35539e-09	748.127	36.7134	587.206	228.127	564.419	38.4754	475.725	352.793	726.138	39.6777	527.716	309.948	15.8441	12.5365	Nontarget	3.11541
[truncated: 9,997 more rows]

## Sheet: TE, covariates, and adjTE 
gene.id	transcript.id	TE.Ribotag.DESeq	mean.gene.TPM	CDS_length	CAI	utr3_length	Dazl_target	adj.TE
1110004F10Rik	NM_019772	6.83713	119.356	546	0.828056	771	DAZL target	3.27444
1110038F14Rik	NM_001347540	3.80153	46.4693	669	0.770109	591	DAZL target	2.19146
1110065P20Rik	NM_001347196	0.192961	62.3916	333	0.777119	382	DAZL target	0.117012
1190002N15Rik	NM_001033145	0.5039	39.09	1293	0.769115	2451	DAZL target	0.306562
1700030K09Rik	NM_028170	0.757556	10.6309	1926	0.809697	390	DAZL target	0.345244
1700066M21Rik	NM_028546	0.775603	24.0364	1098	0.777771	1858	DAZL target	0.488059
1810013L24Rik	NM_001081400	1.54231	58.8269	828	0.793614	2886	DAZL target	0.946006
2010300C02Rik	NM_028096	2.69015	40.7364	3528	0.836057	581	DAZL target	0.897223
2310057M21Rik	NM_026655	10.7683	16.1738	1335	0.763225	1959	DAZL target	7.11303
2510039O18Rik	NM_029841	0.111441	35.2878	1905	0.795214	696	DAZL target	0.0496698
2610001J05Rik	NM_001352887	1.73788	3.05264	180	0.668398	2797	DAZL target	3.07697
2610301B20Rik	NM_026005	1.80217	26.2733	630	0.826531	1371	DAZL target	1.07482
4833420G17Rik	NM_026127	1.82406	72.316	1920	0.783334	200	DAZL target	0.657822
4833439L19Rik	NM_001252646	0.762685	105.394	855	0.824509	1394	DAZL target	0.364035
4930452B06Rik	NM_028934	4.90446	40.5807	2025	0.800441	434	DAZL target	1.96817
4930550L24Rik	NM_023774	4.53387	71.1843	963	0.824939	459	DAZL target	1.90834
4930579G24Rik	NM_029482	0.275327	22.4993	336	0.700399	1535	DAZL target	0.280688
4931406P16Rik	NM_172741	1.45136	55.5617	3180	0.822647	2215	DAZL target	0.588203
4931428F04Rik	NM_001166394	0.553107	33.6934	1404	0.823748	1571	DAZL target	0.273361
4932438A13Rik	NM_172679	0.112097	151.682	15018	0.788851	493	DAZL target	0.0255904
4933416C03Rik	NM_001161855	5.96434	18.8586	1137	0.807825	819	DAZL target	3.17451
4933425L06Rik	NM_025751	7.22822	20.0498	1758	0.782335	361	DAZL target	3.33576
5031439G07Rik	NM_001033273	1.29443	18.0752	1215	0.833853	5302	DAZL target	0.808854
9530068E07Rik	NM_153117	0.117657	62.001	780	0.829419	1647	DAZL target	0.061492
9930021J03Rik	NM_172836	2.0179	41.9236	6285	0.776094	1606	DAZL target	0.786665
Aamp	NM_146110	3.01938	254.619	1308	0.821763	394	DAZL target	1.01138
Abca1	NM_013454	0.080011	99.0107	6786	0.827354	3154	DAZL target	0.0263451
Abcc5	NM_013790	0.0843469	42.2661	4311	0.809931	1300	DAZL target	0.0317799
Abcd3	NM_008991	1.79903	26.5989	1980	0.769097	1328	DAZL target	0.959075
Abhd17a	NM_145421	0.414675	63.3671	933	0.813639	189	DAZL target	0.163847
Abhd17c	NM_133722	1.4442	41.6064	963	0.766626	1226	DAZL target	0.860059
Abhd2	NM_018811	0.103219	36.2605	1278	0.841748	1445	DAZL target	0.048793
Abi1	NM_007380	1.20499	107.978	1428	0.825693	1798	DAZL target	0.525093
Abl1	NM_001283046	1.13709	44.9186	3354	0.832129	2463	DAZL target	0.461301
Abl2	NM_009595	0.777486	59.0172	3549	0.814537	6903	DAZL target	0.3607
Abraxas1	NM_172405	2.51649	53.4183	1224	0.764926	1257	DAZL target	1.38917
Acadm	NM_007382	9.06908	88.7493	1266	0.794977	578	DAZL target	3.90072
Acbd3	NM_133225	7.82348	65.8102	1578	0.777699	1834	DAZL target	4.02734
Acly	NM_134037	4.16988	220.363	3276	0.83444	892	DAZL target	1.23557
Aco1	NM_007386	2.9005	31.4102	2670	0.804265	1342	DAZL target	1.28702
Aco2	NM_080633	0.829158	134.334	2343	0.848365	375	DAZL target	0.242496
Acsl1	NM_001302163	1.86876	44.7647	2100	0.802393	1571	DAZL target	0.862707
Acsl3	NM_001033606	0.190788	127.976	2163	0.798864	1328	DAZL target	0.0765842
Acss2	NM_019811	2.94389	47.6528	2106	0.83196	663	DAZL target	1.11595
Actb	NM_007393	2.38587	1704.41	1128	0.877129	683	DAZL target	0.618671
Actl6a	NM_019673	3.09918	94.1721	1290	0.805993	369	DAZL target	1.20784
Actn1	NM_134156	3.44	22.6845	2679	0.842212	780	DAZL target	1.33639
Actr10	NM_019785	0.618583	76.3538	1254	0.765286	2669	DAZL target	0.35857
Actr6	NM_025914	3.12605	82.795	1191	0.79748	463	DAZL target	1.32684
Acvr2b	NM_001313757	0.302073	18.7607	1539	0.816716	8687	DAZL target	0.198402
Adal	NM_001290811	1.22857	50.0529	882	0.807714	1133	DAZL target	0.645966
Adam10	NM_007399	0.240853	47.1544	2250	0.824911	2135	DAZL target	0.106557
Add3	NM_001277100	8.15874	34.2392	2121	0.799206	2036	DAZL target	4.04159
Adgra3	NM_133911	0.264368	30.7155	3933	0.792398	321	DAZL target	0.0924953
Adgrg1	NM_018882	0.219908	18.7026	2064	0.816878	1221	DAZL target	0.104965
Adi1	NM_134052	1.19251	36.3389	540	0.858245	1089	DAZL target	0.635078
Adipor2	NM_001355692	0.458624	81.4305	1161	0.803316	2650	DAZL target	0.241538
Adk	NM_134079	2.21894	100.619	1086	0.811412	631	DAZL target	0.942628
Adnp	NM_001310086	3.23	26.4214	3327	0.799923	1082	DAZL target	1.36815
Ado	NM_001005419	1.07216	42.6877	771	0.776294	3492	DAZL target	0.745697
Adprh	NM_007414	1.97626	153.66	1089	0.807418	291	DAZL target	0.731314
Adss	NM_007422	5.45451	103.788	1371	0.756969	1067	DAZL target	2.72201
Aebp2	NM_001005605	2.01865	28.0451	1491	0.775306	4695	DAZL target	1.31916
Afdn	NM_010806	4.8457	44.5541	5463	0.818241	1787	DAZL target	1.75099
Aff3	NM_001290814	2.04421	83.5776	3690	0.810274	3458	DAZL target	0.835821
Afg3l2	NM_027130	2.535	67.9936	2409	0.799121	514	DAZL target	0.944674
Aga	NM_001005847	0.280856	22.3195	1041	0.809079	146	DAZL target	0.119516
Agfg1	NM_010472	1.05329	26.7733	1680	0.802043	5943	DAZL target	0.644732
Agpat5	NM_026792	0.51169	65.8822	1098	0.766981	2450	DAZL target	0.306167
Agps	NM_172666	1.80678	38.5983	2016	0.777593	5307	DAZL target	1.07181
Ahctf1	NM_026375	2.93357	128.837	6732	0.769765	1429	DAZL target	0.991885
Ahcyl1	NM_145542	2.51946	79.0998	1593	0.806176	1987	DAZL target	1.18398
Ahdc1	NM_146155	1.44472	47.2572	4785	0.816419	1167	DAZL target	0.50856
Ahi1	NM_026203	5.86453	40.8104	3144	0.798623	1343	DAZL target	2.46958
Ahsa2	NM_001290654	1.68306	11.0617	852	0.801828	2516	DAZL target	1.19467
AI597479	NM_133818	0.573973	27.6119	699	0.782603	2704	DAZL target	0.408222
Aig1	NM_001347362	0.100396	37.5635	717	0.804979	614	DAZL target	0.053286
Ajuba	NM_010590	1.0454	26.0219	1644	0.779224	1462	DAZL target	0.573814
Ak2	NM_016895	1.72481	73.4994	699	0.809276	962	DAZL target	0.892447
Ak4	NM_001177602	1.64683	41.5162	672	0.769008	4104	DAZL target	1.23577
Akap11	NM_001164503	2.1362	120.681	5685	0.782407	3530	DAZL target	0.820108
Akap13	NM_029332	3.10988	68.3297	8331	0.814728	3986	DAZL target	1.08626
Akap17b	NM_001081956	5.24415	23.7246	2880	0.796632	2790	DAZL target	2.64878
Akap8	NM_019774	4.20494	75.3331	2064	0.82218	1585	DAZL target	1.74293
Akirin1	NM_023423	1.09878	151.616	576	0.709255	1659	DAZL target	0.780786
Akirin2	NM_001007589	3.34069	119.071	606	0.75609	683	DAZL target	1.87398
Akt3	NM_011785	0.443344	71.1462	1440	0.782336	5288	DAZL target	0.261205
Aldh1a2	NM_009022	8.10135	29.0688	1557	0.824065	649	DAZL target	3.54765
Aldh3a2	NM_007437	2.69852	27.4608	1455	0.783466	1558	DAZL target	1.50843
Aldh7a1	NM_001127338	3.5808	93.0489	1536	0.825244	1217	DAZL target	1.48653
Alg10b	NM_001033441	0.139729	41.8592	1425	0.757998	2175	DAZL target	0.0838317
Alg2	NM_019998	0.162122	32.8006	1248	0.805705	1726	DAZL target	0.0876961
Alkbh1	NM_001102565	1.46927	49.2913	1170	0.794839	763	DAZL target	0.713858
Alkbh5	NM_172943	1.61424	81.5832	1188	0.816902	4097	DAZL target	0.862136
Als2	NM_001159948	2.57527	97.3302	4956	0.802705	1421	DAZL target	0.880363
Amfr	NM_011787	0.097757	27.2836	1920	0.783578	1579	DAZL target	0.0513834
Ammecr1l	NM_153515	1.35638	57.4736	933	0.807217	3328	DAZL target	0.796674
Amot	NM_153319	1.55711	39.4846	3381	0.814668	3577	DAZL target	0.702981
Amotl2	NM_019764	9.77581	7.47925	2319	0.819497	1711	DAZL target	5.23584
Ampd2	NM_001346665	3.30869	69.1557	2475	0.830244	856	DAZL target	1.20177
Anapc1	NM_008569	3.34573	132.415	5835	0.781108	2865	DAZL target	1.23428
Anapc10	NM_001357236	1.61612	30.9567	558	0.800563	2159	DAZL target	1.10484
Anapc11	NM_001038230	0.788278	45.918	255	0.859384	2772	DAZL target	0.545731
Angel1	NM_144524	0.160476	24.3683	2004	0.813712	1779	DAZL target	0.0791669
Angel2	NM_021421	1.02066	86.7186	1635	0.78144	1400	DAZL target	0.482598
Ank	NM_020332	0.212004	7.57854	1479	0.812668	1690	DAZL target	0.127814
Ankfy1	NM_009671	1.19824	46.6906	3510	0.798786	4501	DAZL target	0.565459
Ankrd10	NM_133971	0.712044	94.2166	1248	0.806138	903	DAZL target	0.313503
Ankrd12	NM_001025572	2.17998	63.3318	6126	0.797341	2651	DAZL target	0.819821
Ankrd13c	NM_001013806	1.09052	40.1685	1626	0.784089	2164	DAZL target	0.592207
Ankrd17	NM_030886	6.24494	183.582	7812	0.779236	2116	DAZL target	2.00621
Ankrd29	NM_001190371	1.05808	3.04831	930	0.788633	2237	DAZL target	0.872015
Ankrd45	NM_028664	1.1438	17.2239	849	0.779193	2819	DAZL target	0.833716
Ankrd46	NM_175134	1.49095	40.7776	687	0.803707	1589	DAZL target	0.897397
Anln	NM_028390	3.50759	76.5689	3366	0.784217	1836	DAZL target	1.46448
Anp32e	NM_023210	14.5226	80.3499	783	0.827965	2137	DAZL target	7.63935
Anxa7	NM_001110794	3.83635	122.338	1392	0.80148	1218	DAZL target	1.68199
Ap1ar	NM_145964	3.02149	57.2929	897	0.817675	1484	DAZL target	1.57062
Ap1g1	NM_009677	2.32248	58.5594	2478	0.768478	4014	DAZL target	1.2396
Ap2a1	NM_001077264	2.23025	101.036	2868	0.820376	365	DAZL target	0.689646
Ap3s2	NM_009682	0.559262	25.7724	582	0.820028	5159	DAZL target	0.410491
Apba2	NM_001291167	2.07532	41.8947	2253	0.84983	734	DAZL target	0.760604
Apbb1ip	NM_019456	1.16757	4.39156	2013	0.789233	332	DAZL target	0.603933
Apc	NM_007462	2.7018	74.1519	8529	0.801377	3609	DAZL target	0.951584
Apex1	NM_009687	1.99312	284.759	954	0.768827	215	DAZL target	0.757571
Api5	NM_007466	1.91942	105.824	1515	0.788815	2032	DAZL target	0.92772
Aplp2	NM_001102455	0.197475	113.557	2256	0.809243	1314	DAZL target	0.0772904
Appbp2	NM_025825	4.62748	166.998	1758	0.7896	336	DAZL target	1.62449
Appl1	NM_145221	4.23628	42.5059	2124	0.767758	4740	DAZL target	2.48812
Aqr	NM_009702	4.10028	101.59	4446	0.798049	278	DAZL target	1.17469
Araf	NM_009703	0.96129	40.7337	1815	0.816493	408	DAZL target	0.37575
Arcn1	NM_145985	4.43175	110.358	1536	0.790206	1783	DAZL target	2.08163
Arf1	NM_001130408	4.30746	250.725	546	0.814089	1122	DAZL target	2.06194
Arf3	NM_001355510	1.55461	162.204	546	0.83525	2709	DAZL target	0.828695
Arf4	NM_007479	3.20947	148.717	543	0.793049	860	DAZL target	1.67125
Arf6	NM_007481	1.56598	96.3337	528	0.834626	2659	DAZL target	0.892572
Arfgap3	NM_001357756	1.73572	30.173	1578	0.83764	945	DAZL target	0.76418
Arfgef1	NM_001102430	2.37929	100.499	5541	0.770689	1325	DAZL target	0.855109
Arfip1	NM_001293801	0.859657	29.4897	1026	0.775912	1643	DAZL target	0.531
Arglu1	NM_176849	1.18707	81.5395	816	0.733736	676	DAZL target	0.692456
Arhgap1	NM_146124	5.21381	22.9193	1320	0.839175	1420	DAZL target	2.5906
Arhgap17	NM_144529	4.09385	30.1485	2541	0.799749	837	DAZL target	1.7589
Arhgap29	NM_172525	4.59135	87.8875	3801	0.772652	1702	DAZL target	1.8766
Arhgap32	NM_001195632	2.10843	56.0227	6270	0.810441	4363	DAZL target	0.823083
Arhgap44	NM_175003	1.22694	50.7471	2295	0.823763	1456	DAZL target	0.511669
Arhgap5	NM_009706	1.94333	105.791	4512	0.771805	513	DAZL target	0.642409
Arhgef1	NM_001130152	3.41101	54.8072	2763	0.815091	341	DAZL target	1.14759
Arhgef11	NM_001003912	2.29081	51.082	4659	0.81379	937	DAZL target	0.78727
Arhgef18	NM_133962	3.44593	45.1596	3066	0.812429	2065	DAZL target	1.46875
Arhgef2	NM_008487	3.82941	29.1093	2958	0.796842	1189	DAZL target	1.68202
Arhgef3	NM_001289686	3.99073	34.7531	1656	0.800001	1932	DAZL target	2.07043
Arhgef7	NM_017402	2.84298	77.3445	1941	0.816752	2125	DAZL target	1.25511
Arid1a	NM_001080819	3.23428	54.5487	6852	0.815895	1323	DAZL target	1.04939
Arid4b	NM_194262	3.69385	55.7596	3945	0.811907	1870	DAZL target	1.43386
Arih1	NM_019927	1.89438	69.2085	1668	0.821441	4740	DAZL target	0.960192
Arih2	NM_001357285	2.52733	40.667	1479	0.820482	2139	DAZL target	1.26743
Arl14epl	NM_001033446	1.09449	53.007	459	0.840868	1594	DAZL target	0.635918
Arl2bp	NM_024191	1.06044	85.0695	492	0.839073	1339	DAZL target	0.564129
Arl5a	NM_182994	0.965108	29.2788	540	0.768719	4433	DAZL target	0.801316
Arl5b	NM_029466	0.459323	32.7172	540	0.77148	6152	DAZL target	0.389645
Arl6ip1	NM_019419	0.0520147	164.303	612	0.786624	1402	DAZL target	0.0282301
Arl6ip6	NM_022989	0.632998	34.8776	681	0.748663	1833	DAZL target	0.461796
Arl8a	NM_026823	1.8275	44.9642	561	0.787298	997	DAZL target	1.12246
Armc8	NM_001166138	1.53536	48.6375	1200	0.745814	2176	DAZL target	0.975574
Armcx2	NM_001166397	1.20344	32.5446	2355	0.796086	386	DAZL target	0.476974
Arntl	NM_007489	2.55035	36.1033	1881	0.777352	507	DAZL target	1.14691
Arpc1a	NM_019767	0.512406	185.997	1113	0.8475	341	DAZL target	0.169555
Arpc2	NM_029711	2.23498	219.873	903	0.816678	414	DAZL target	0.845625
Arpc3	NM_019824	1.98354	404.937	537	0.812191	250	DAZL target	0.747678
Arpc5	NM_026369	0.815297	159.335	456	0.812411	1258	DAZL target	0.436863
Arpc5l	NM_028809	1.46347	90.1302	462	0.761945	752	DAZL target	0.898261
Arrdc3	NM_001042591	0.26729	172.817	1245	0.790468	2617	DAZL target	0.131336
Arrdc4	NM_001042592	2.93319	38.9702	1248	0.786997	2483	DAZL target	1.71498
Asah1	NM_019734	0.0756545	74.1229	1185	0.764764	950	DAZL target	0.0391046
Asb3	NM_023906	0.62238	18.5298	1578	0.769126	1462	DAZL target	0.368907
Asb8	NM_030121	1.17264	44.5552	867	0.794423	1166	DAZL target	0.652749
Ascc3	NM_198007	0.76085	63.2018	6597	0.770929	609	DAZL target	0.250658
Asf1a	NM_025541	1.78445	60.6532	615	0.770116	1338	DAZL target	1.12943
Asz1	NM_023729	6.82688	233.348	1428	0.780237	287	DAZL target	2.43249
Atad1	NM_026487	0.151689	99.8546	1086	0.758506	1681	DAZL target	0.0846601
Atad2	NM_027435	0.665681	112.585	4095	0.783044	1480	DAZL target	0.248024
Atad2b	NM_001362349	1.8985	29.4379	4374	0.777759	3347	DAZL target	0.91631
Atf1	NM_007497	1.6904	82.1	810	0.781838	1289	DAZL target	0.93413
Atf2	NM_001025093	0.547342	80.8588	1464	0.784476	2413	DAZL target	0.28455
Atf7ip2	NM_153123	1.40619	58.6219	1359	0.802438	1095	DAZL target	0.663898
Atg101	NM_026566	3.94426	71.704	657	0.828426	262	DAZL target	1.66998
Atg14	NM_172599	3.43723	81.3141	1479	0.801429	1944	DAZL target	1.65431
Atg5	NM_053069	2.71732	92.5357	828	0.805089	1247	DAZL target	1.37692
Atic	NM_026195	5.20675	130.341	1779	0.786296	732	DAZL target	2.09166
Atl1	NM_178628	2.408	32.8937	1677	0.796724	747	DAZL target	1.11966
Atm	NM_007499	1.21295	66.6542	9192	0.768687	2624	DAZL target	0.446685
Atp11b	NM_029570	0.184797	63.2382	3528	0.770567	1090	DAZL target	0.0758145
Atp11c	NM_001037863	0.0867582	33.3793	3390	0.766453	2514	DAZL target	0.0435442
Atp2a2	NM_001110140	0.267214	64.0428	3135	0.818938	827	DAZL target	0.0951245
Atp2b1	NM_026482	0.253989	71.7677	3663	0.779035	3024	DAZL target	0.11333
Atp2b4	NM_213616	0.22007	17.359	3618	0.810307	4017	DAZL target	0.110427
Atp5b	NM_016774	1.38908	807.804	1590	0.792687	269	DAZL target	0.401018
Atp5g3	NM_001301721	0.683933	243.162	426	0.824152	146	DAZL target	0.26071
Atp6ap1	NM_018794	0.0605157	35.7834	1392	0.803511	715	DAZL target	0.0283941
Atp6ap2	NM_027439	0.103876	41.3834	1053	0.753128	1178	DAZL target	0.0627039
Atp6v1a	NM_007508	2.62433	44.7051	1854	0.810378	2020	DAZL target	1.26036
Atp6v1b2	NM_007509	2.56341	177.342	1536	0.822005	1148	DAZL target	0.98899
[truncated: 11,794 more rows]

## Sheet: Nontargets, TPM-matched
gene.id	transcript.id	trans.eff.Ribotag.DESeq	mean.gene.TPM	CDS_length	CAI	utr3_length	Dazl_target
[truncated: 2,518 more rows]

[truncated: 1 more sheets: Nontargets, CDS length-matched]
