# Supplementary material for: DAZL mediates a broad translational program regulating expansion and differentiation of spermatogonial progenitors
Source: eLife journal article supplement (doi:10.7554/elife.56523), 2020-07-20
Supplement: supp [file elife-56523-supp-v1.zip › elife_poa_e56523_Supplementary_file_1.xlsx]

## Sheet: Sheet1
Legend: Information on statistical tests, alternative hypotheses, and P values used
Figure panel	Sample	Comparison	Test	Alternative hypothesis	P value
Figure 1C	FOXC2-positive cells per 100 SOX9-positive cells	DAZL-positive control vs. mosaic Dazl cKO	Mann-Whitney U	two-sided	0.095
Figure 1C	FOXC2-positive cells per 100 SOX9-positive cells	DAZL-positive control vs. DAZL-negative Dazl cKO	Mann-Whitney U	two-sided	0.019
Figure 1C	ZBTB16-positive cells per 100 SOX9-positive cells	DAZL-positive control vs. mosaic Dazl cKO	Mann-Whitney U	two-sided	1.85 x 10-6
Figure 1C	ZBTB16-positive cells per 100 SOX9-positive cells	DAZL-positive control vs. DAZL-negative Dazl cKO	Mann-Whitney U	two-sided	1.57 x 10-10
Figure 1C	KIT-positive cells per 100 SOX9-positive cells	DAZL-positive control vs. mosaic Dazl cKO	Mann-Whitney U	two-sided	7.06 x 10-9
Figure 1C	KIT-positive cells per 100 SOX9-positive cells	DAZL-positive control vs. DAZL-negative Dazl cKO	Mann-Whitney U	two-sided	1.33 x 10-10
Figure 1C	KIT-positive cells per 100 ZBTB16-positive cells	DAZL-positive control vs. mosaic Dazl cKO	Odds ratio	two-sided	1.06 x 10-4
Figure 1C	KIT-positive cells per 100 ZBTB16-positive cells	DAZL-positive control vs. DAZL-negative Dazl cKO	Odds ratio	two-sided	1.40 x 10-6
Figure 1 - figure supplement 2C	SOX9-positive cells per 0.03mm^2 tubule cross section	DAZL-positive control vs. mosaic Dazl cKO	Mann-Whitney U	two-sided	< 2.2 x 10-16
Figure 1 - figure supplement 2C	SOX9-positive cells per 0.03mm^2 tubule cross section	DAZL-positive control vs. DAZL-negative Dazl cKO	Mann-Whitney U	two-sided	< 2.2 x 10-16
Figure 2D	Percentage of genes that regulate undifferentiated spermatogonia	DAZL targets vs. expressed genes	Hypergeometric	one-sided (upper tail)	1.71 x 10-8
Figure 3C	Percentage of testis-specific genes	DAZL targets vs. expressed genes	Hypergeometric	one-sided (lower tail)	1.78 x 10-13
Figure 3D	Mouse expression breadth	DAZL targets vs. nontargets	Mann-Whitney U	one-sided	< 2.2 x 10-16
Figure 3E	Percentage of genes with yeast orthologs	DAZL targets vs. expressed genes	Hypergeometric	one-sided (upper tail)	2.09 x 10-17
Figure 3F	Mouse-human dN/dS ratio	DAZL targets vs. nontargets	Mann-Whitney U	one-sided	< 2.2 x 10-16
Figure 3G	Human CNV intolerance score	DAZL targets vs. nontargets	Mann-Whitney U	one-sided	7.51 x 10-5
Figure 3H	Human haploinsufficiency score	DAZL targets vs. nontargets	Mann-Whitney U	one-sided	< 2.2 x 10-16
Figure 3I	Human deletion intolerance score	DAZL targets vs. nontargets	Mann-Whitney U	one-sided	5.6 x 10-16
Figure 3J	Human duplication intolerance score	DAZL targets vs. nontargets	Mann-Whitney U	one-sided	0.045
Figure 3K	mRNA conservation score (Pct)	DAZL targets vs. nontargets	Mann-Whitney U	one-sided	< 2.2 x 10-16
Figure 4D	phyloP conservation score	DAZL bound nucleotides vs. unbound nucleotides	Mann-Whitney U	two-sided	< 2.2 x 10-16
Figure 4E	phastCons conservation score	DAZL bound nucleotides vs. unbound nucleotides	Mann-Whitney U	two-sided	< 2.2 x 10-16
Figure 4H	Relative position of binding sites within 3' UTR	DAZL binding sites vs. random sites	Kolmogorov-Smirnov	two-sided	< 2.2 x 10-16
Figure 4I	Binding sites' distance from start of 3' UTR	DAZL binding sites vs. random sites	Kolmogorov-Smirnov	two-sided	5.20 x 10-10
Figure 4I	Binding sites' distance from end of 3' UTR	DAZL binding sites vs. random sites	Kolmogorov-Smirnov	two-sided	< 2.2 x 10-16
Figure 4 - figure supplement 2E	Relative position of binding site density within 3' UTR	DAZL binding sites vs. random sites	Kolmogorov-Smirnov	two-sided	< 2.2 x 10-16
Figure 4 - figure supplement 2F	Binding site density from start of 3' UTR	DAZL binding sites vs. random sites	Kolmogorov-Smirnov	two-sided	2.00 x 10-15
Figure 4 - figure supplement 2F	Binding site density from end of 3' UTR	DAZL binding sites vs. random sites	Kolmogorov-Smirnov	two-sided	< 2.2 x 10-16
Figure 5C	Translational efficiency	DAZL targets vs. nontargets	Mann-Whitney U	two-sided	< 2.2 x 10-16
Figure 5D	Translational efficiency	DAZL targets vs. nontargets matched for transcript abundance	Mann-Whitney U	two-sided	1.22 x 10-14
Figure 5D	Translational efficiency	DAZL targets vs. nontargets matched for CDS length	Mann-Whitney U	two-sided	< 2.2 x 10-16
Figure 5E	Adjusted translational efficiency	DAZL targets vs. nontargets	Mann-Whitney U	two-sided	< 2.2 x 10-16
Figure 5 - figure supplement 1A	Translational efficiency (log2)	Non-histones vs. replicated-dependent histones	Mann-Whitney U	two-sided	5.62 x 10-10
Figure 5 - figure supplement 1B	Transcript abundance (log2 TPM)	DAZL targets vs. nontargets	Kolmogorov-Smirnov	two-sided	< 2.2 x 10-16
Figure 5 - figure supplement 1B	CDS length (log2 nt)	DAZL targets vs. nontargets	Kolmogorov-Smirnov	two-sided	< 2.2 x 10-16
Figure 5 - figure supplement 1B	3' UTR length (log2 nt)	DAZL targets vs. nontargets	Kolmogorov-Smirnov	two-sided	< 2.2 x 10-16
Figure 5 - figure supplement 1B	Codon usage (CAI)	DAZL targets vs. nontargets	Kolmogorov-Smirnov	two-sided	< 2.2 x 10-16
