# Supplementary figures and images for: DAZL mediates a broad translational program regulating expansion and differentiation of spermatogonial progenitors
Source: eLife journal article supplement (doi:10.7554/elife.56523), 2020-07-20

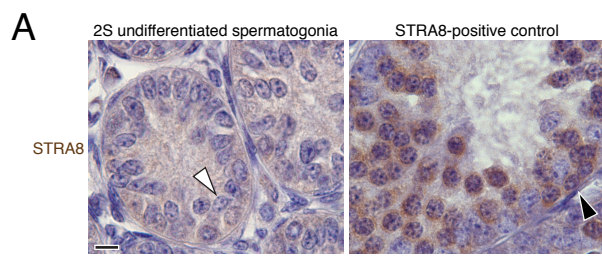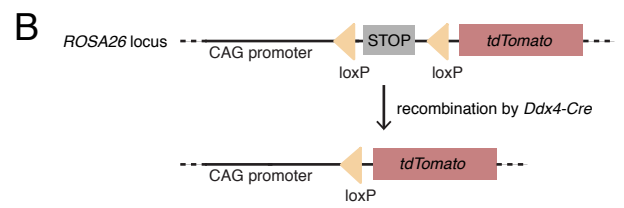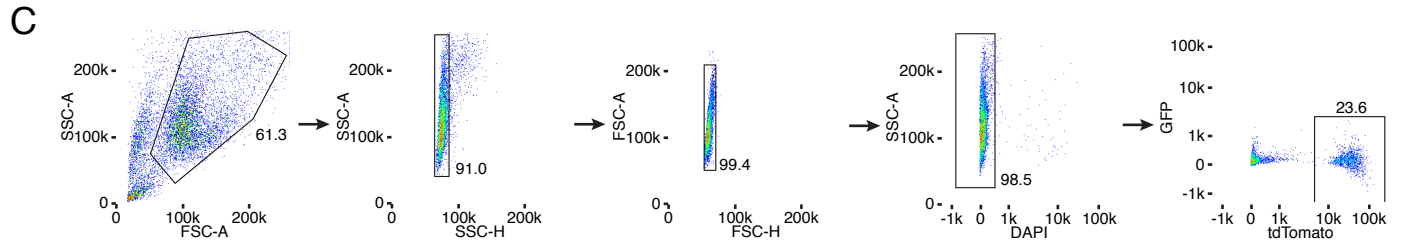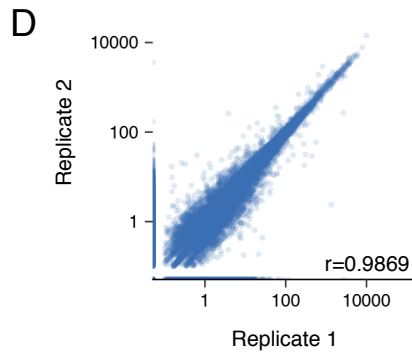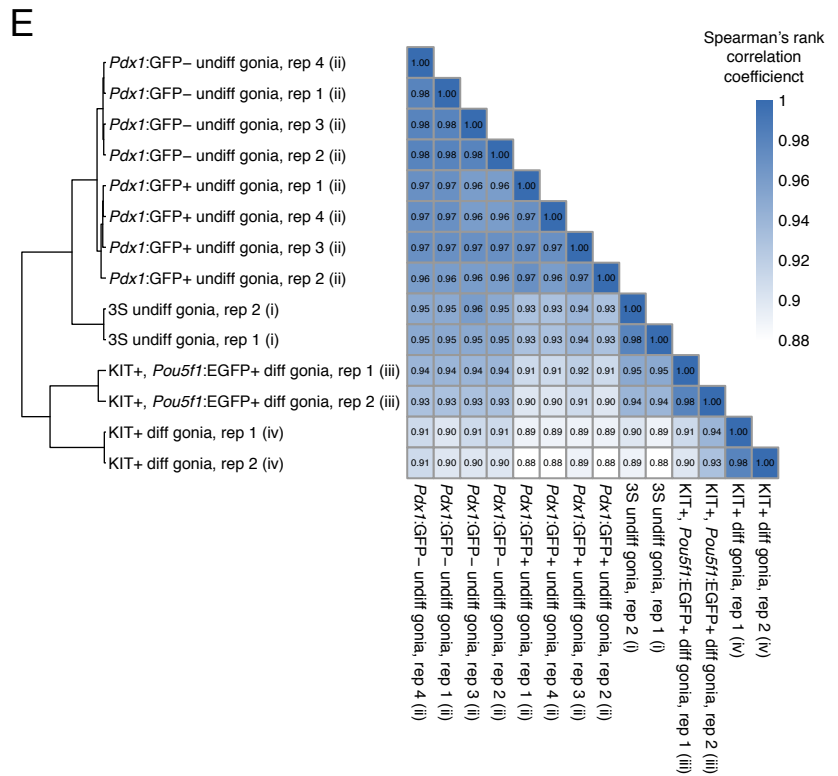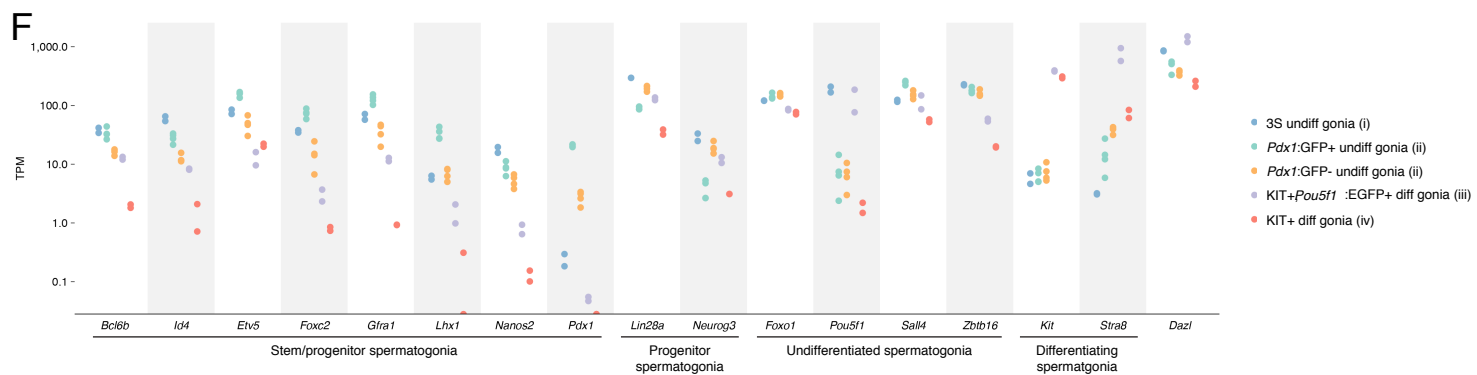

Supplement: supp [file elife-56523-supp-v1.zip]

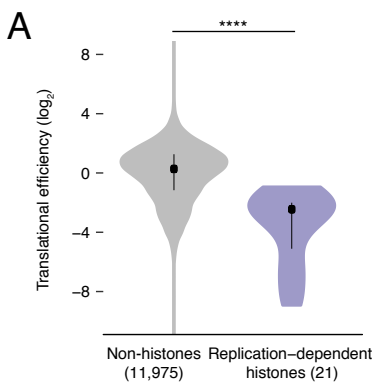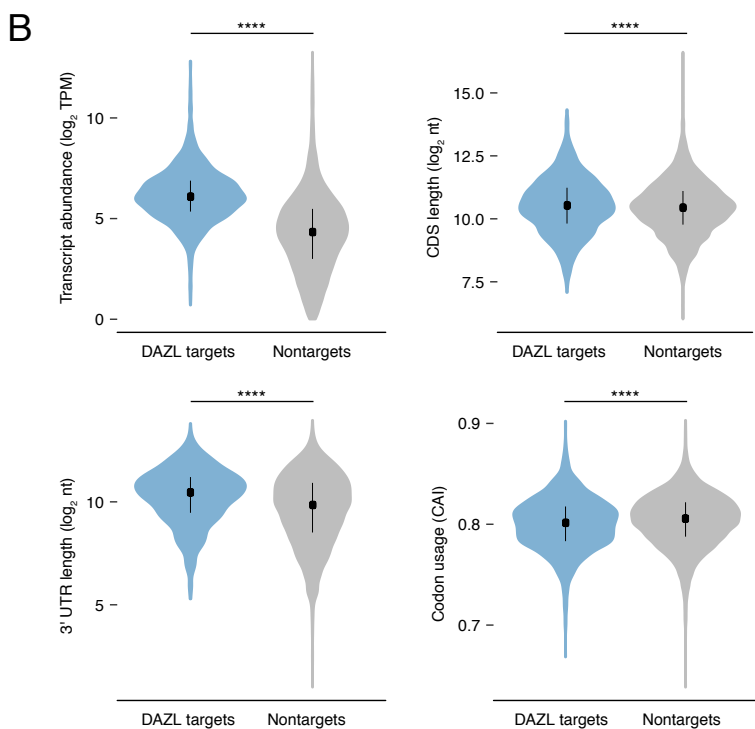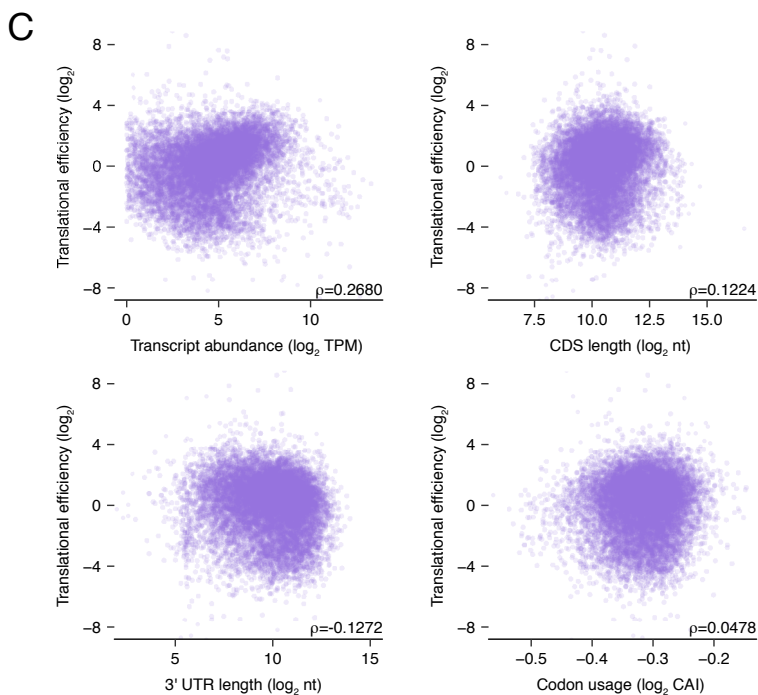

Supplement: supp [file elife-56523-supp-v1.zip]

A

*Dazl*:tdTomato  
SOX9  
DNA

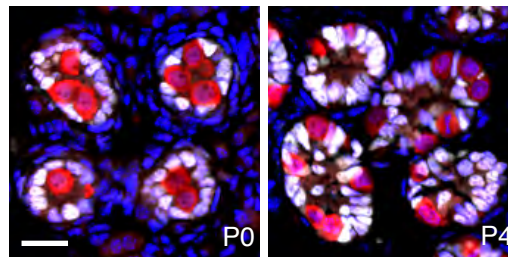

B

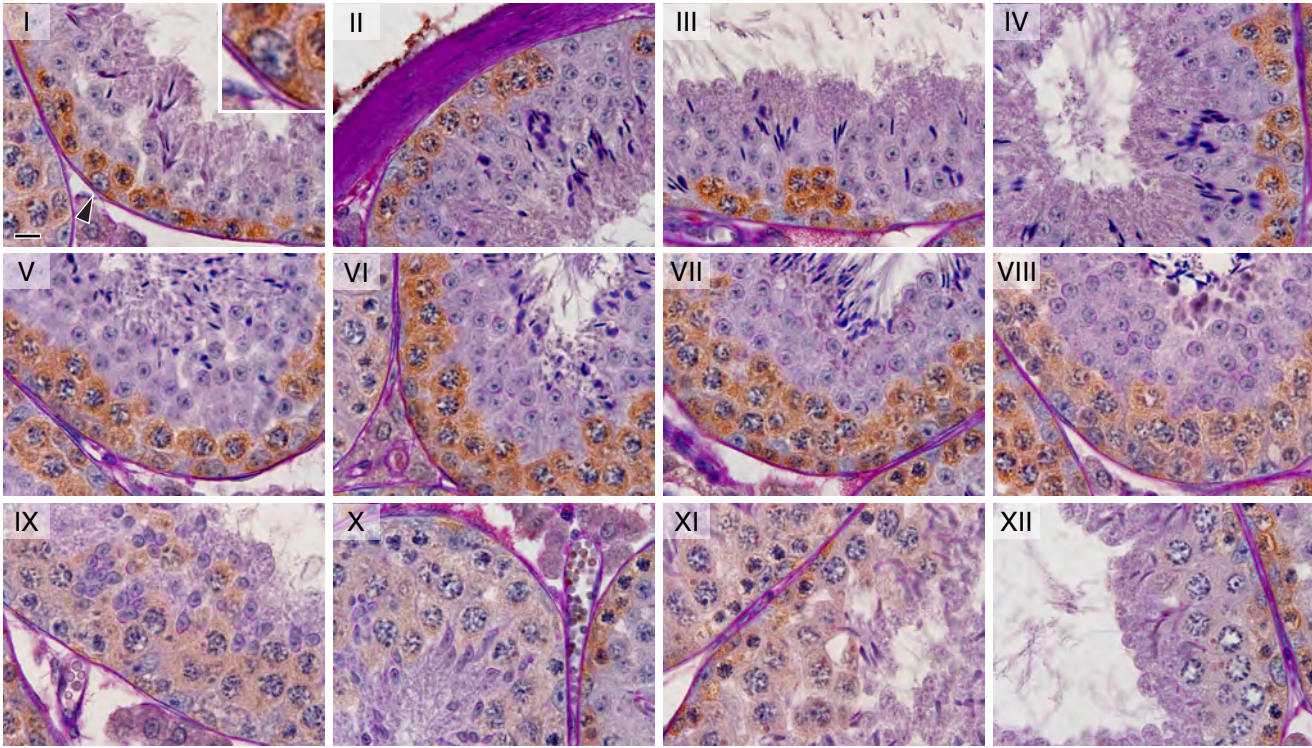

C

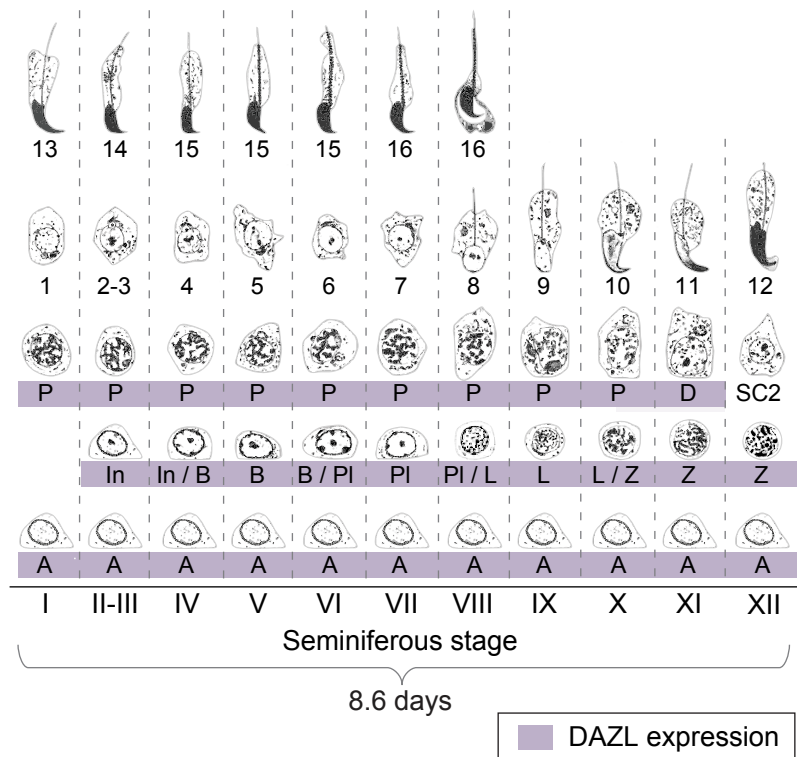

Supplement: supp [file elife-56523-supp-v1.zip]

A

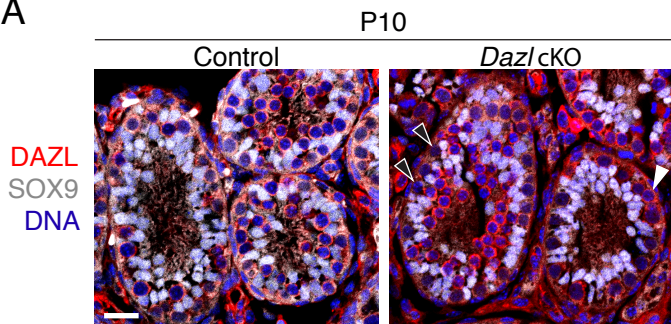

B

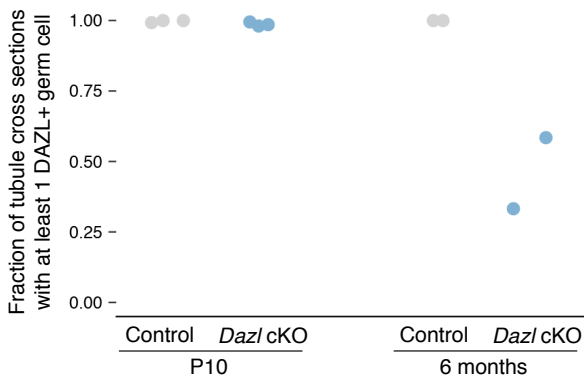

C

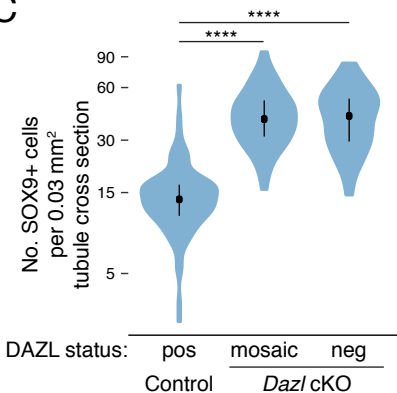

Supplement: supp [file elife-56523-supp-v1.zip › elife_poa_e56523_Figure_1_figure_supplement_2.pdf]

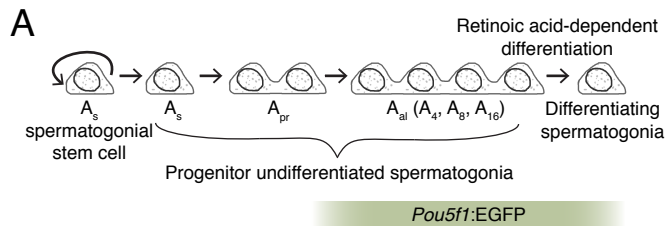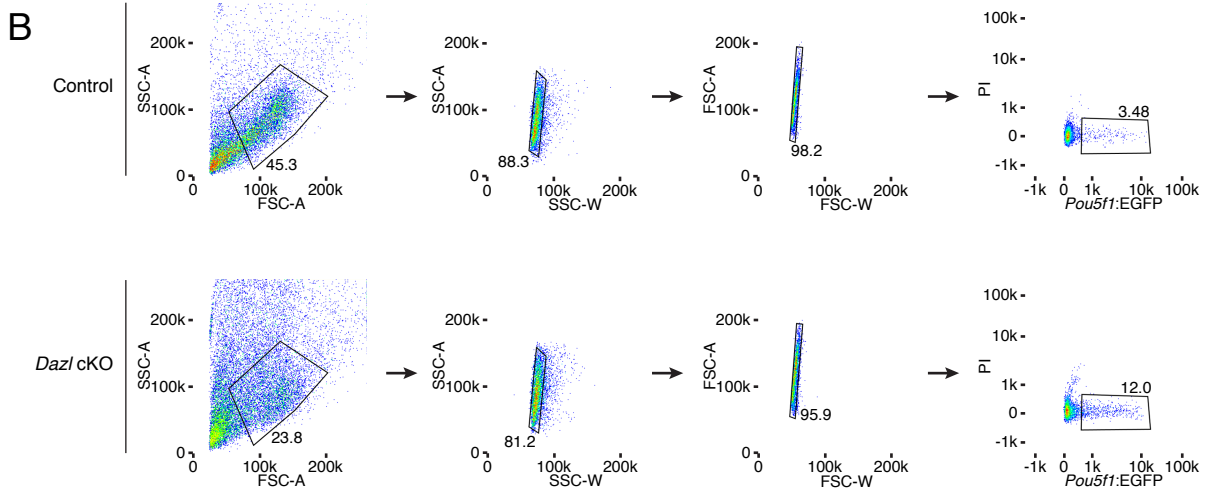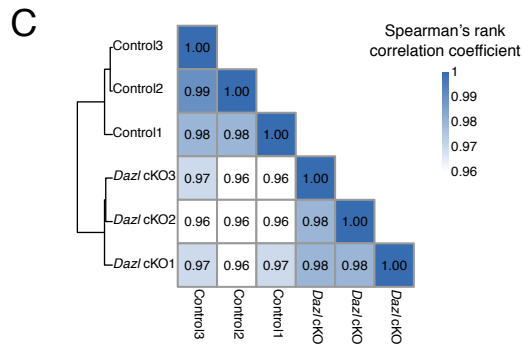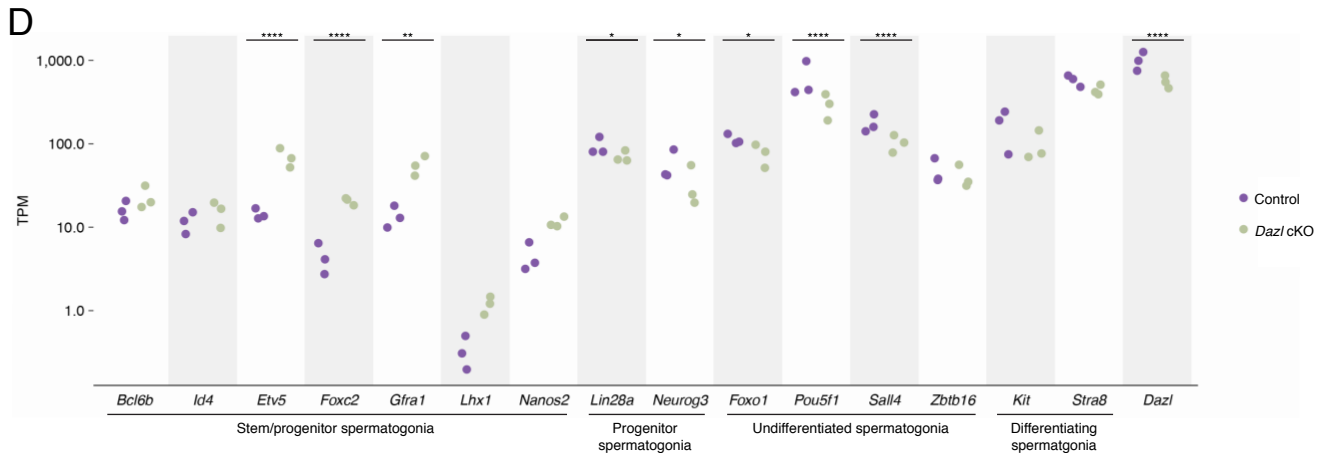

Supplement: supp [file elife-56523-supp-v1.zip › elife_poa_e56523_Figure_1_figure_supplement_3.pdf]

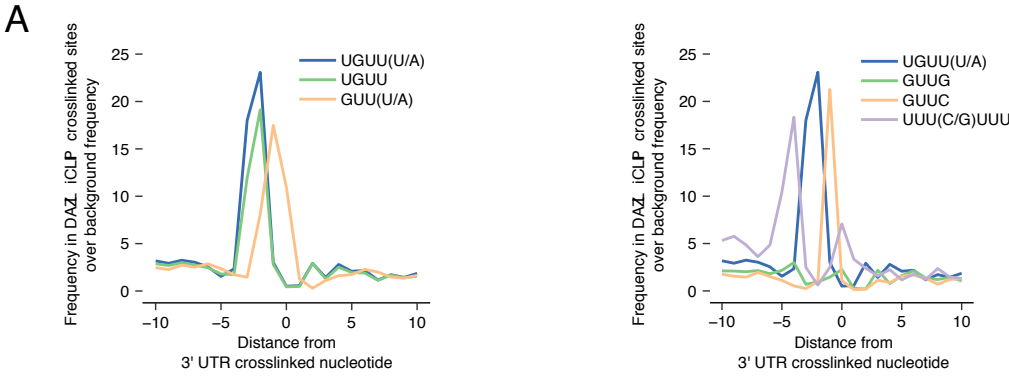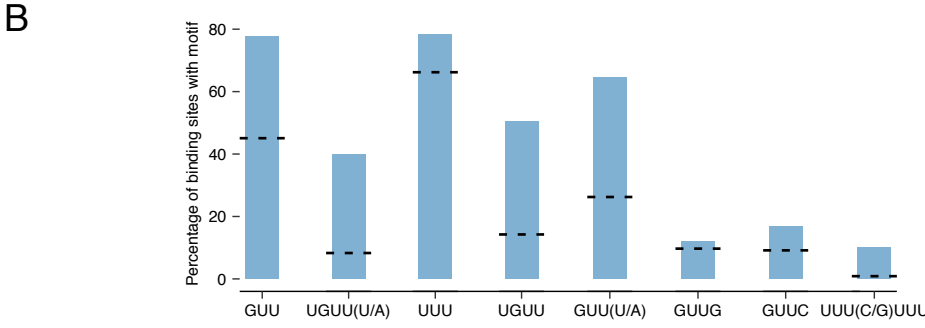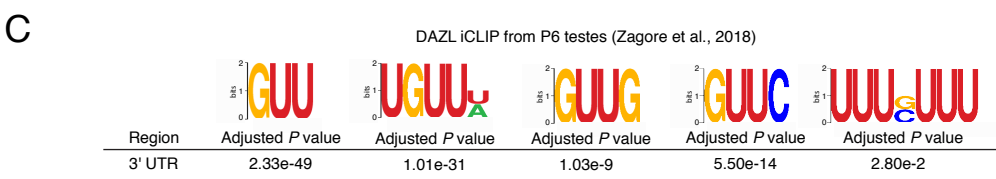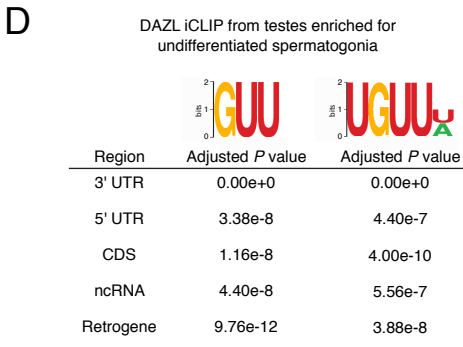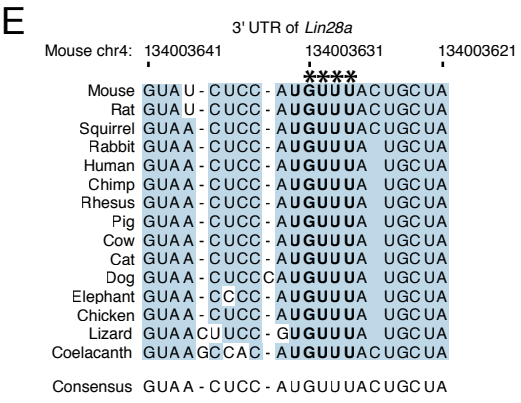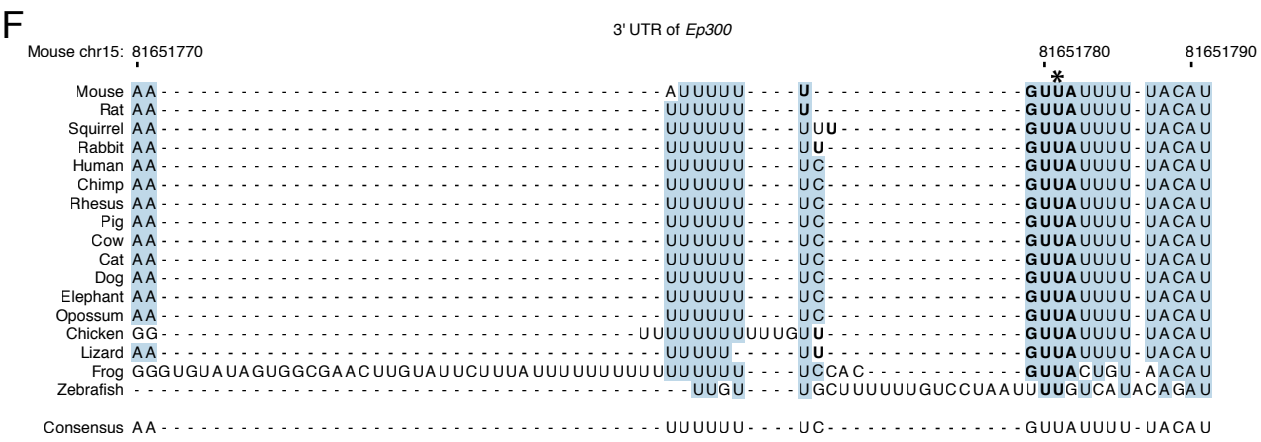

Supplement: supp [file elife-56523-supp-v1.zip › elife_poa_e56523_Figure_4_figure_supplement_1.pdf]

**A**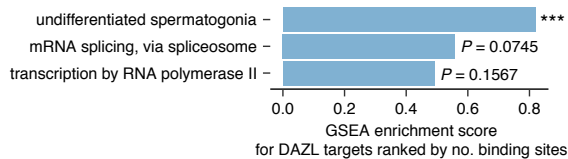**B**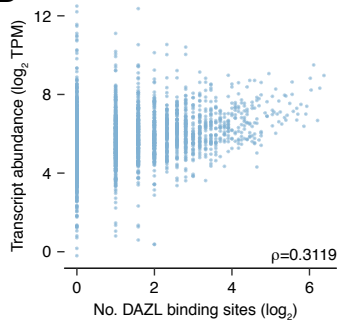**C**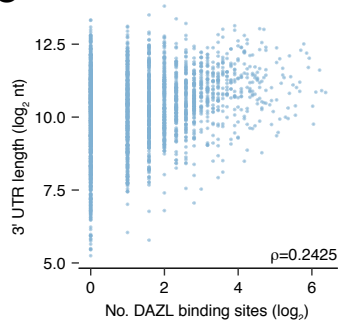**D**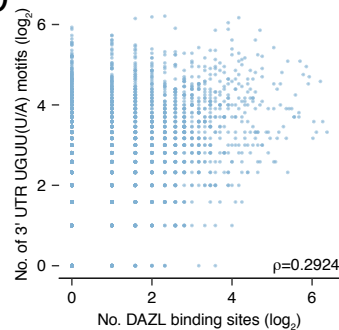**E**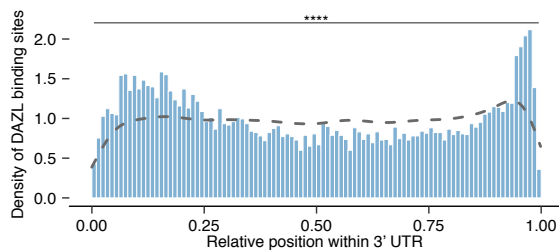**F**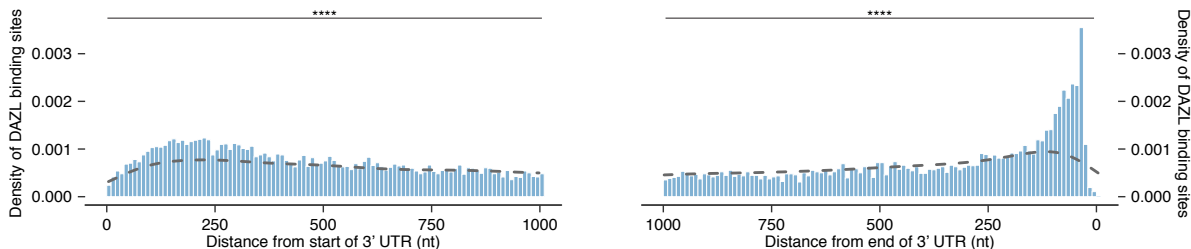

Supplement: supp [file elife-56523-supp-v1.zip › elife_poa_e56523_Figure_4_figure_supplement_2.pdf]
